# Supplementary material for: Reactions of chemically activated C9H9 species II: The reaction of phenyl radicals with allene and cyclopropene, and of benzyl radicals with acetyleneElectronic supplementary information (ESI) available: Full [C9H9] reaction scheme. Additional quantum chemical calculations not reported yet in earlier publications. Full product distribution and over-all rate coefficient listings, both uncorrected and effective data, for all reaction conditions examined. For the most important products, tables are included listing the yield as function of temperature and pressure. Modified Arrhenius fits for the over-all TST rate coefficient and the TST rate coefficient of the different entrance channels are listed for different temperature intervals. See http://www.rsc.org/suppdata/cp/b3/b303908k/ or contact the authors directly, or download from the website http://arrhenius.chem.kuleuven.ac.be.
Source: Royal Society of Chemistry journal article supplement (doi:10.1039/b303908k), 2003-01-01
Supplement: phenylcyclopropene.pdf [file phenylcyclopropene.pdf]

**Reactions of chemically activated C<sub>9</sub>H<sub>9</sub> species II:  
The reaction of phenyl radicals with allene and cyclopropene,  
and of benzyl with acetylene**

- Supporting information -

Luc Vereecken, Jozef Peeters

Submitted to Phys. Chem. Chem. Phys

---

## Content

Page 2 : Modified Arrhenius expressions for the rate coefficient of the phenyl + cyclopropene reaction, and the partial rate coefficients for the three entrance channels, as derived in the TST calculations.

Page 3 : Temperature and pressure-dependent product yields (all products)

Page 911 : Tabulated effective product yields for the major products

Product species needed to obtain a product fraction of 0.995

| species                                          | maximum contribution |
|--------------------------------------------------|----------------------|
| Indene+H                                         | 0.999773             |
| rad9                                             | 0.995618             |
| rad19anti                                        | 0.992414             |
| Benzene+cycloprop-2-enylidene                    | 0.510559             |
| PhCHCCH <sub>2</sub> +H                          | 0.378742             |
| Benzene+cycloprop-1-enylidene                    | 0.246352             |
| rad19syn                                         | 0.135199             |
| PhCH <sub>2</sub> CCH+H                          | 0.0168111            |
| Ph+MeAc                                          | 0.0150749            |
| C <sub>2</sub> H <sub>2</sub> +PhCH <sub>2</sub> | 0.0127872            |
| Ph+Allene                                        | 0.0119308            |
| rad15                                            | 0.0100785            |
| PhCCH+CH <sub>3</sub>                            | 0.00793383           |
| rad12                                            | 0.00769961           |
| rad8                                             | 0.00765395           |
| rad67                                            | 0.00522213           |
| PhCCCH <sub>3</sub> +H                           | 0.00385133           |
| rad35                                            | 0.00211841           |
| PAH10+CH <sub>3</sub>                            | 0.00159320           |
| rad6                                             | 0.00110745           |
| PAH3+H                                           | 0.00105686           |
| Phenyl+cycC <sub>3</sub> H <sub>4</sub>          | 0.00000              |

More information is available (population-averaged unimolecular rate coefficients, relative concentrations of intermediates,...), which is not included here due to the volume of the data. Contact the authors directly for obtaining additional supporting information.

## Modified Arrhenius expressions

Modified Arrhenius expressions for the total and partial rate coefficients of the initial reaction of phenyl + cyclopropene.

10-300 K :

$$k_{\text{rad19}}(T) = 6.864 \times 10^{-16} \cdot T^{0.931} \cdot \exp(-3.045 \text{ kJ mol}^{-1} / kT)$$
$$k_{\text{benzene+cycloprop-1-enyl}}(T) = 1.489 \times 10^{-11} \cdot T^{-0.619} \cdot \exp(-35.828 \text{ kJ mol}^{-1} / kT)$$
$$k_{\text{benzene+cycloprop-2-enyl}}(T) = 1.829 \times 10^{-11} \cdot T^{-0.722} \cdot \exp(-21.342 \text{ kJ mol}^{-1} / kT)$$
$$k_{\text{tot}}(T) = 6.845 \times 10^{-16} \cdot T^{0.931} \cdot \exp(-3.044 \text{ kJ mol}^{-1} / kT)$$

reproduces TST calculations within factor of 1.5

200-2000 K :

$$k_{\text{rad19}}(T) = 3.989 \times 10^{-20} \cdot T^{2.574} \cdot \exp(-1.375 \text{ kJ mol}^{-1} / kT)$$
$$k_{\text{benzene+cycloprop-1-enyl}}(T) = 9.873 \times 10^{-22} \cdot T^{3.127} \cdot \exp(-29.881 \text{ kJ mol}^{-1} / kT)$$
$$k_{\text{benzene+cycloprop-2-enyl}}(T) = 4.339 \times 10^{-22} \cdot T^{3.196} \cdot \exp(-15.240 \text{ kJ mol}^{-1} / kT)$$
$$k_{\text{tot}}(T) = 3.533 \times 10^{-22} \cdot T^{3.253} \cdot \exp(-0.646 \text{ kJ mol}^{-1} / kT)$$

reproduces TST calculations within factor of 1.1

1000-4000 K :

$$k_{\text{rad19}}(T) = 6.195 \times 10^{-20} \cdot T^{2.520} \cdot \exp(-1.936 \text{ kJ mol}^{-1} / kT)$$
$$k_{\text{benzene+cycloprop-1-enyl}}(T) = 8.870 \times 10^{-21} \cdot T^{2.867} \cdot \exp(-33.466 \text{ kJ mol}^{-1} / kT)$$
$$k_{\text{benzene+cycloprop-2-enyl}}(T) = 7.747 \times 10^{-21} \cdot T^{2.851} \cdot \exp(-19.555 \text{ kJ mol}^{-1} / kT)$$
$$k_{\text{tot}}(T) = 9.873 \times 10^{-23} \cdot T^{3.426} \cdot \exp(-0.897 \text{ kJ mol}^{-1} / kT)$$

reproduces TST calculations within factor of 1.02

## Temperature and pressure-dependent product yields (all products)

- Pressure range spans 1E-9 to 1E8 Pa, in steps of 1 order of magnitude.
- Temperature starts at 20K, increases in steps of 10K to 300K, then in steps of 100K to 1500K, and finally in steps of 250K up to 4000K.
- Rate constants are in units of  $\text{cm}^3 \text{ molecule}^{-1} \text{ s}^{-1}$ , product yields (PY) in fractions.
- The "effective" rate constants and product yields are corrected for redissociation to the original reactants, the columns denoted "true" are the original values prior to correction.
- Products are listed in order of importance. The columns marked "Cumul" give the cumulative sum of all product yields, to facilitate the selection of major versus minor products.
- cyc1enyl stands for cycloprop-1-enyl, cyc2enyl stands for cycloprop-2-enyl

100000000. Pa, 20.0000000 K

=====

| Rate constant             | True (fraction)         | Effective (fraction)    |
|---------------------------|-------------------------|-------------------------|
| Total                     | 1.24541e-22 (1.00 )     | 1.24541e-22 (1.00 )     |
| Formation of rad19        | 1.24541e-22 (1.00 )     | 1.24541e-22 (1.00 )     |
| H-abstraction to cyc2enyl | 3.84323e-68 (3.09e-46)  | 3.84323e-68 (3.09e-46)  |
| H-abstraction to cyc1enyl | 6.26313e-106 (5.03e-84) | 6.26313e-106 (5.03e-84) |

| species        | PYtrue      | Cumul    | PYeffective | Cumul    |
|----------------|-------------|----------|-------------|----------|
| rad19anti      | 0.863102    | 0.863102 | 0.863102    | 0.863102 |
| rad19syn       | 0.135199    | 0.998301 | 0.135199    | 0.998301 |
| rad8           | 0.00108078  | 0.999382 | 0.00108078  | 0.999382 |
| rad9           | 0.000618618 | 1.00000  | 0.000618618 | 1.00000  |
| rad12          | 5.24808e-10 | 1.00000  | 5.24808e-10 | 1.00000  |
| rad15          | 3.03571e-10 | 1.00000  | 3.03571e-10 | 1.00000  |
| rad7           | 1.00585e-11 | 1.00000  | 1.00585e-11 | 1.00000  |
| Indene+H       | 3.05043e-15 | 1.00000  | 3.05043e-15 | 1.00000  |
| PhCHCCH2+H     | 2.85778e-15 | 1.00000  | 2.85778e-15 | 1.00000  |
| rad6           | 2.79979e-16 | 1.00000  | 2.79979e-16 | 1.00000  |
| rad2           | 1.82590e-16 | 1.00000  | 1.82590e-16 | 1.00000  |
| rad5           | 1.06096e-16 | 1.00000  | 1.06096e-16 | 1.00000  |
| PhcycC3H3_A+H  | 1.00649e-16 | 1.00000  | 1.00649e-16 | 1.00000  |
| rad1           | 6.04383e-17 | 1.00000  | 6.04383e-17 | 1.00000  |
| rad11          | 5.72257e-17 | 1.00000  | 5.72257e-17 | 1.00000  |
| rad20          | 1.18790e-17 | 1.00000  | 1.18790e-17 | 1.00000  |
| Phenyl+cycC3H4 | 8.04586e-18 | 1.00000  | 0.00000     | 1.00000  |
| rad21          | 6.40939e-18 | 1.00000  | 6.40939e-18 | 1.00000  |
| rad26          | 4.55726e-20 | 1.00000  | 4.55726e-20 | 1.00000  |
| rad18          | 1.79114e-20 | 1.00000  | 1.79114e-20 | 1.00000  |
| rad22          | 1.89405e-21 | 1.00000  | 1.89405e-21 | 1.00000  |
| C2H2+PhCH2     | 6.21793e-22 | 1.00000  | 6.21793e-22 | 1.00000  |
| rad24          | 4.88298e-22 | 1.00000  | 4.88298e-22 | 1.00000  |
| rad67          | 1.36482e-22 | 1.00000  | 1.36482e-22 | 1.00000  |
| PhCCH+CH3      | 1.14331e-22 | 1.00000  | 1.14331e-22 | 1.00000  |
| rad10          | 9.97813e-23 | 1.00000  | 9.97813e-23 | 1.00000  |
| rad35          | 6.40731e-23 | 1.00000  | 6.40731e-23 | 1.00000  |
| rad31          | 5.92351e-23 | 1.00000  | 5.92351e-23 | 1.00000  |
| PhcycC3H3_B+H  | 3.32165e-23 | 1.00000  | 3.32165e-23 | 1.00000  |
| rad13          | 1.58685e-23 | 1.00000  | 1.58685e-23 | 1.00000  |
| rad3           | 1.22307e-23 | 1.00000  | 1.22307e-23 | 1.00000  |
| rad45          | 7.84370e-24 | 1.00000  | 7.84370e-24 | 1.00000  |
| PhCCCH3+H      | 4.68710e-24 | 1.00000  | 4.68710e-24 | 1.00000  |
| rad4           | 4.41412e-24 | 1.00000  | 4.41412e-24 | 1.00000  |
| Ph+MeAc        | 1.30680e-24 | 1.00000  | 1.30680e-24 | 1.00000  |
| rad36          | 1.29244e-24 | 1.00000  | 1.29244e-24 | 1.00000  |
| rad27          | 1.21566e-24 | 1.00000  | 1.21566e-24 | 1.00000  |
| rad25          | 3.42904e-25 | 1.00000  | 3.42904e-25 | 1.00000  |
| rad33          | 3.29127e-25 | 1.00000  | 3.29127e-25 | 1.00000  |
| Ph+Allene      | 1.80930e-25 | 1.00000  | 1.80930e-25 | 1.00000  |
| PhCH2CCH+H     | 2.66884e-26 | 1.00000  | 2.66884e-26 | 1.00000  |
| rad23          | 1.66427e-27 | 1.00000  | 1.66427e-27 | 1.00000  |
| rad30          | 1.00111e-28 | 1.00000  | 1.00111e-28 | 1.00000  |
| rad28          | 3.06710e-30 | 1.00000  | 3.06710e-30 | 1.00000  |
| rad37          | 1.36096e-30 | 1.00000  | 1.36096e-30 | 1.00000  |
| rad60syn       | 2.29511e-31 | 1.00000  | 2.29511e-31 | 1.00000  |
| rad14          | 1.39074e-31 | 1.00000  | 1.39074e-31 | 1.00000  |
| rad60anti      | 1.06819e-31 | 1.00000  | 1.06819e-31 | 1.00000  |

|                               |             |         |             |         |
|-------------------------------|-------------|---------|-------------|---------|
| PAH3+H                        | 5.23855e-32 | 1.00000 | 5.23855e-32 | 1.00000 |
| PAH7+H                        | 4.20792e-32 | 1.00000 | 4.20792e-32 | 1.00000 |
| rad59                         | 1.15777e-32 | 1.00000 | 1.15777e-32 | 1.00000 |
| rad38                         | 2.03467e-33 | 1.00000 | 2.03467e-33 | 1.00000 |
| PAH10+CH3                     | 5.40369e-34 | 1.00000 | 5.40369e-34 | 1.00000 |
| rad43                         | 1.78036e-35 | 1.00000 | 1.78036e-35 | 1.00000 |
| rad46                         | 1.01399e-36 | 1.00000 | 1.01399e-36 | 1.00000 |
| rad54                         | 5.66916e-37 | 1.00000 | 5.66916e-37 | 1.00000 |
| rad58                         | 1.86505e-37 | 1.00000 | 1.86505e-37 | 1.00000 |
| rad70                         | 7.88110e-38 | 1.00000 | 7.88110e-38 | 1.00000 |
| PAH1+H                        | 1.10558e-38 | 1.00000 | 1.10558e-38 | 1.00000 |
| PAH9+H                        | 6.28726e-39 | 1.00000 | 6.28726e-39 | 1.00000 |
| rad50                         | 2.62022e-39 | 1.00000 | 2.62022e-39 | 1.00000 |
| rad55                         | 2.52552e-39 | 1.00000 | 2.52552e-39 | 1.00000 |
| rad34                         | 4.78339e-40 | 1.00000 | 4.78339e-40 | 1.00000 |
| rad39                         | 3.41140e-40 | 1.00000 | 3.41140e-40 | 1.00000 |
| rad41                         | 7.34432e-41 | 1.00000 | 7.34432e-41 | 1.00000 |
| rad52                         | 4.04508e-43 | 1.00000 | 4.04508e-43 | 1.00000 |
| rad62                         | 3.78247e-43 | 1.00000 | 3.78247e-43 | 1.00000 |
| rad51                         | 5.82841e-44 | 1.00000 | 5.82841e-44 | 1.00000 |
| rad47                         | 2.10820e-44 | 1.00000 | 2.10820e-44 | 1.00000 |
| Benzene+cycloprop-2-enylidene | 3.08591e-46 | 1.00000 | 3.08591e-46 | 1.00000 |
| rad53                         | 5.23484e-47 | 1.00000 | 5.23484e-47 | 1.00000 |
| rad42                         | 6.88546e-48 | 1.00000 | 6.88546e-48 | 1.00000 |
| rad65                         | 4.12471e-48 | 1.00000 | 4.12471e-48 | 1.00000 |
| rad61                         | 1.66256e-49 | 1.00000 | 1.66256e-49 | 1.00000 |
| rad68syn                      | 1.93314e-53 | 1.00000 | 1.93314e-53 | 1.00000 |
| rad68anti                     | 1.57259e-53 | 1.00000 | 1.57259e-53 | 1.00000 |
| rad56                         | 1.41678e-53 | 1.00000 | 1.41678e-53 | 1.00000 |
| rad64                         | 8.50436e-56 | 1.00000 | 8.50436e-56 | 1.00000 |
| rad40syn                      | 1.92346e-58 | 1.00000 | 1.92346e-58 | 1.00000 |
| rad40anti                     | 1.50802e-58 | 1.00000 | 1.50802e-58 | 1.00000 |
| PAH8+H                        | 3.66370e-61 | 1.00000 | 3.66370e-61 | 1.00000 |
| rad73                         | 2.72062e-65 | 1.00000 | 2.72062e-65 | 1.00000 |
| rad71                         | 2.13752e-70 | 1.00000 | 2.13752e-70 | 1.00000 |
| Benzene+cycloprop-1-enylidene | 5.02895e-84 | 1.00000 | 5.02895e-84 | 1.00000 |

10000000. Pa, 30.000000 K

| Rate constant             | True (fraction)        | Effective (fraction)   |
|---------------------------|------------------------|------------------------|
| Total                     | 8.13009e-20 (1.00 )    | 8.13009e-20 (1.00 )    |
| Formation of rad19        | 8.13009e-20 (1.00 )    | 8.13009e-20 (1.00 )    |
| H-abstraction to cyc2enyl | 1.08880e-49 (1.34e-30) | 1.08880e-49 (1.34e-30) |
| H-abstraction to cyc1enyl | 7.55172e-75 (9.29e-56) | 7.55172e-75 (9.29e-56) |

| species        | PYtrue      | Cumul    | PYeffective | Cumul    |
|----------------|-------------|----------|-------------|----------|
| rad19anti      | 0.976087    | 0.976087 | 0.976087    | 0.976087 |
| rad19syn       | 0.0204673   | 0.996554 | 0.0204673   | 0.996554 |
| rad9           | 0.00189231  | 0.998447 | 0.00189231  | 0.998447 |
| rad8           | 0.00155322  | 1.000000 | 0.00155322  | 1.000000 |
| rad12          | 3.43812e-09 | 1.000000 | 3.43812e-09 | 1.000000 |
| rad15          | 2.03392e-09 | 1.000000 | 2.03392e-09 | 1.000000 |
| rad7           | 1.82045e-11 | 1.000000 | 1.82045e-11 | 1.000000 |
| Indene+H       | 4.29381e-14 | 1.000000 | 4.29381e-14 | 1.000000 |
| PhCHCCH2+H     | 1.45265e-14 | 1.000000 | 1.45265e-14 | 1.000000 |
| rad6           | 1.03543e-15 | 1.000000 | 1.03543e-15 | 1.000000 |
| rad2           | 7.42015e-16 | 1.000000 | 7.42015e-16 | 1.000000 |
| rad11          | 4.13871e-16 | 1.000000 | 4.13871e-16 | 1.000000 |
| rad5           | 3.80167e-16 | 1.000000 | 3.80167e-16 | 1.000000 |
| rad1           | 2.92930e-16 | 1.000000 | 2.92930e-16 | 1.000000 |
| PhcycC3H3_A+H  | 2.17924e-16 | 1.000000 | 2.17924e-16 | 1.000000 |
| rad20          | 4.27529e-17 | 1.000000 | 4.27529e-17 | 1.000000 |
| rad21          | 3.32074e-17 | 1.000000 | 3.32074e-17 | 1.000000 |
| Phenyl+cycC3H4 | 1.91196e-17 | 1.000000 | 0.000000    | 1.000000 |
| rad26          | 6.64396e-19 | 1.000000 | 6.64396e-19 | 1.000000 |
| rad18          | 2.49263e-19 | 1.000000 | 2.49263e-19 | 1.000000 |
| rad22          | 1.96486e-20 | 1.000000 | 1.96486e-20 | 1.000000 |
| rad24          | 4.96843e-21 | 1.000000 | 4.96843e-21 | 1.000000 |
| C2H2+PhCH2     | 4.61195e-21 | 1.000000 | 4.61195e-21 | 1.000000 |
| rad67          | 2.03398e-21 | 1.000000 | 2.03398e-21 | 1.000000 |
| rad35          | 9.53265e-22 | 1.000000 | 9.53265e-22 | 1.000000 |
| PhCCH+CH3      | 8.50818e-22 | 1.000000 | 8.50818e-22 | 1.000000 |
| rad10          | 7.40889e-22 | 1.000000 | 7.40889e-22 | 1.000000 |
| rad31          | 2.55393e-22 | 1.000000 | 2.55393e-22 | 1.000000 |
| rad45          | 1.53368e-22 | 1.000000 | 1.53368e-22 | 1.000000 |
| rad3           | 1.20735e-22 | 1.000000 | 1.20735e-22 | 1.000000 |
| rad13          | 1.19848e-22 | 1.000000 | 1.19848e-22 | 1.000000 |
| PhcycC3H3_B+H  | 9.47490e-23 | 1.000000 | 9.47490e-23 | 1.000000 |

|                               |             |          |             |          |
|-------------------------------|-------------|----------|-------------|----------|
| rad4                          | 7.24473e-23 | 1.000000 | 7.24473e-23 | 1.000000 |
| PhCCCH3+H                     | 4.32499e-23 | 1.000000 | 4.32499e-23 | 1.000000 |
| rad36                         | 3.43801e-23 | 1.000000 | 3.43801e-23 | 1.000000 |
| Ph+MeAc                       | 1.87723e-23 | 1.000000 | 1.87723e-23 | 1.000000 |
| rad27                         | 9.05906e-24 | 1.000000 | 9.05906e-24 | 1.000000 |
| rad25                         | 5.14224e-24 | 1.000000 | 5.14224e-24 | 1.000000 |
| Ph+Allene                     | 2.74645e-24 | 1.000000 | 2.74645e-24 | 1.000000 |
| rad33                         | 2.48986e-24 | 1.000000 | 2.48986e-24 | 1.000000 |
| PhCH2CCH+H                    | 3.93255e-25 | 1.000000 | 3.93255e-25 | 1.000000 |
| rad23                         | 3.47765e-26 | 1.000000 | 3.47765e-26 | 1.000000 |
| rad30                         | 2.92289e-27 | 1.000000 | 2.92289e-27 | 1.000000 |
| rad28                         | 5.56911e-29 | 1.000000 | 5.56911e-29 | 1.000000 |
| rad37                         | 4.17033e-29 | 1.000000 | 4.17033e-29 | 1.000000 |
| rad60syn                      | 6.77554e-30 | 1.000000 | 6.77554e-30 | 1.000000 |
| rad14                         | 3.56425e-30 | 1.000000 | 3.56425e-30 | 1.000000 |
| rad60anti                     | 3.15632e-30 | 1.000000 | 3.15632e-30 | 1.000000 |
| PAH3+H                        | 1.56394e-30 | 1.000000 | 1.56394e-30 | 1.000000 |
| Benzene+cycloprop-2-enylidene | 1.33923e-30 | 1.000000 | 1.33923e-30 | 1.000000 |
| PAH7+H                        | 9.20783e-31 | 1.000000 | 9.20783e-31 | 1.000000 |
| rad59                         | 3.45184e-31 | 1.000000 | 3.45184e-31 | 1.000000 |
| rad38                         | 6.34449e-32 | 1.000000 | 6.34449e-32 | 1.000000 |
| PAH10+CH3                     | 1.70739e-32 | 1.000000 | 1.70739e-32 | 1.000000 |
| rad43                         | 2.79546e-34 | 1.000000 | 2.79546e-34 | 1.000000 |
| rad46                         | 4.13082e-35 | 1.000000 | 4.13082e-35 | 1.000000 |
| rad54                         | 9.04931e-36 | 1.000000 | 9.04931e-36 | 1.000000 |
| rad58                         | 5.76874e-36 | 1.000000 | 5.76874e-36 | 1.000000 |
| rad70                         | 2.54377e-36 | 1.000000 | 2.54377e-36 | 1.000000 |
| PAH1+H                        | 3.62891e-37 | 1.000000 | 3.62891e-37 | 1.000000 |
| PAH9+H                        | 2.62772e-37 | 1.000000 | 2.62772e-37 | 1.000000 |
| rad50                         | 1.07685e-37 | 1.000000 | 1.07685e-37 | 1.000000 |
| rad55                         | 4.09059e-38 | 1.000000 | 4.09059e-38 | 1.000000 |
| rad34                         | 1.58141e-38 | 1.000000 | 1.58141e-38 | 1.000000 |
| rad39                         | 1.35150e-38 | 1.000000 | 1.35150e-38 | 1.000000 |
| rad41                         | 1.23641e-39 | 1.000000 | 1.23641e-39 | 1.000000 |
| rad52                         | 3.24171e-41 | 1.000000 | 3.24171e-41 | 1.000000 |
| rad62                         | 2.21079e-41 | 1.000000 | 2.21079e-41 | 1.000000 |
| rad51                         | 4.72951e-42 | 1.000000 | 4.72951e-42 | 1.000000 |
| rad47                         | 9.14059e-43 | 1.000000 | 9.14059e-43 | 1.000000 |
| rad53                         | 9.67960e-46 | 1.000000 | 9.67960e-46 | 1.000000 |
| rad42                         | 4.32632e-46 | 1.000000 | 4.32632e-46 | 1.000000 |
| rad65                         | 1.76204e-46 | 1.000000 | 1.76204e-46 | 1.000000 |
| rad61                         | 6.68208e-48 | 1.000000 | 6.68208e-48 | 1.000000 |
| rad68syn                      | 8.05830e-52 | 1.000000 | 8.05830e-52 | 1.000000 |
| rad68anti                     | 6.55318e-52 | 1.000000 | 6.55318e-52 | 1.000000 |
| rad56                         | 2.66648e-52 | 1.000000 | 2.66648e-52 | 1.000000 |
| rad64                         | 4.87545e-54 | 1.000000 | 4.87545e-54 | 1.000000 |
| Benzene+cycloprop-1-enylidene | 9.28861e-56 | 1.000000 | 9.28861e-56 | 1.000000 |
| rad40syn                      | 4.31254e-57 | 1.000000 | 4.31254e-57 | 1.000000 |
| rad40anti                     | 3.31298e-57 | 1.000000 | 3.31298e-57 | 1.000000 |
| PAH8+H                        | 9.96518e-60 | 1.000000 | 9.96518e-60 | 1.000000 |
| rad73                         | 3.85895e-63 | 1.000000 | 3.85895e-63 | 1.000000 |
| rad71                         | 3.36207e-68 | 1.000000 | 3.36207e-68 | 1.000000 |

100000000. Pa, 40.0000000 K

| Rate constant             | True (fraction)        | Effective (fraction)   |
|---------------------------|------------------------|------------------------|
| Total                     | 2.24819e-18 (1.00)     | 2.24819e-18 (1.00)     |
| Formation of rad19        | 2.24819e-18 (1.00)     | 2.24819e-18 (1.00)     |
| H-abstraction to cyc2enyl | 1.72361e-40 (7.67e-23) | 1.72361e-40 (7.67e-23) |
| H-abstraction to cyc1enyl | 2.48792e-59 (1.11e-41) | 2.48792e-59 (1.11e-41) |

| species       | PYtrue      | Cumul    | PYeffective | Cumul    |
|---------------|-------------|----------|-------------|----------|
| rad19anti     | 0.991065    | 0.991065 | 0.991065    | 0.991065 |
| rad19syn      | 0.00381482  | 0.994880 | 0.00381482  | 0.994880 |
| rad9          | 0.00334691  | 0.998227 | 0.00334691  | 0.998227 |
| rad8          | 0.00177324  | 1.000000 | 0.00177324  | 1.000000 |
| rad12         | 9.35759e-09 | 1.000000 | 9.35759e-09 | 1.000000 |
| rad15         | 5.65979e-09 | 1.000000 | 5.65979e-09 | 1.000000 |
| rad7          | 2.51144e-11 | 1.000000 | 2.51144e-11 | 1.000000 |
| Indene+H      | 1.83189e-13 | 1.000000 | 1.83189e-13 | 1.000000 |
| PhCHCCH2+H    | 3.73749e-14 | 1.000000 | 3.73749e-14 | 1.000000 |
| rad6          | 2.14986e-15 | 1.000000 | 2.14986e-15 | 1.000000 |
| rad2          | 1.73772e-15 | 1.000000 | 1.73772e-15 | 1.000000 |
| rad11         | 1.23392e-15 | 1.000000 | 1.23392e-15 | 1.000000 |
| rad5          | 7.63712e-16 | 1.000000 | 7.63712e-16 | 1.000000 |
| rad1          | 6.58682e-16 | 1.000000 | 6.58682e-16 | 1.000000 |
| PhcycC3H3_A+H | 3.72484e-16 | 1.000000 | 3.72484e-16 | 1.000000 |
| rad21         | 8.70969e-17 | 1.000000 | 8.70969e-17 | 1.000000 |

|                               |             |          |             |          |
|-------------------------------|-------------|----------|-------------|----------|
| rad20                         | 8.63058e-17 | 1.000000 | 8.63058e-17 | 1.000000 |
| Phenyl+cycC3H4                | 4.18900e-17 | 1.000000 | 0.00000     | 1.000000 |
| rad26                         | 2.93666e-18 | 1.000000 | 2.93666e-18 | 1.000000 |
| rad18                         | 1.08472e-18 | 1.000000 | 1.08472e-18 | 1.000000 |
| rad22                         | 7.64267e-20 | 1.000000 | 7.64267e-20 | 1.000000 |
| rad24                         | 1.90142e-20 | 1.000000 | 1.90142e-20 | 1.000000 |
| C2H2+PhCH2                    | 1.41368e-20 | 1.000000 | 1.41368e-20 | 1.000000 |
| rad67                         | 9.20806e-21 | 1.000000 | 9.20806e-21 | 1.000000 |
| rad35                         | 4.30696e-21 | 1.000000 | 4.30696e-21 | 1.000000 |
| PhCCH+CH3                     | 2.61821e-21 | 1.000000 | 2.61821e-21 | 1.000000 |
| rad10                         | 2.32787e-21 | 1.000000 | 2.32787e-21 | 1.000000 |
| rad45                         | 8.65050e-22 | 1.000000 | 8.65050e-22 | 1.000000 |
| rad31                         | 4.96400e-22 | 1.000000 | 4.96400e-22 | 1.000000 |
| rad3                          | 4.22527e-22 | 1.000000 | 4.22527e-22 | 1.000000 |
| rad13                         | 3.75112e-22 | 1.000000 | 3.75112e-22 | 1.000000 |
| rad4                          | 3.04361e-22 | 1.000000 | 3.04361e-22 | 1.000000 |
| PhcycC3H3_B+H                 | 2.73947e-22 | 1.000000 | 2.73947e-22 | 1.000000 |
| rad36                         | 2.06111e-22 | 1.000000 | 2.06111e-22 | 1.000000 |
| PhCCCH3+H                     | 1.57200e-22 | 1.000000 | 1.57200e-22 | 1.000000 |
| Ph+MeAc                       | 8.29744e-23 | 1.000000 | 8.29744e-23 | 1.000000 |
| Benzene+cycloprop-2-enylidene | 7.66665e-23 | 1.000000 | 7.66665e-23 | 1.000000 |
| rad27                         | 2.84984e-23 | 1.000000 | 2.84984e-23 | 1.000000 |
| rad25                         | 2.34587e-23 | 1.000000 | 2.34587e-23 | 1.000000 |
| Ph+Allene                     | 1.27398e-23 | 1.000000 | 1.27398e-23 | 1.000000 |
| rad33                         | 7.81399e-24 | 1.000000 | 7.81399e-24 | 1.000000 |
| PhCH2CCH+H                    | 1.81972e-24 | 1.000000 | 1.81972e-24 | 1.000000 |
| rad23                         | 2.02863e-25 | 1.000000 | 2.02863e-25 | 1.000000 |
| rad30                         | 1.95587e-26 | 1.000000 | 1.95587e-26 | 1.000000 |
| rad28                         | 3.00294e-28 | 1.000000 | 3.00294e-28 | 1.000000 |
| rad37                         | 2.87784e-28 | 1.000000 | 2.87784e-28 | 1.000000 |
| rad60syn                      | 4.60307e-29 | 1.000000 | 4.60307e-29 | 1.000000 |
| rad60anti                     | 2.14711e-29 | 1.000000 | 2.14711e-29 | 1.000000 |
| rad14                         | 2.14408e-29 | 1.000000 | 2.14408e-29 | 1.000000 |
| PAH3+H                        | 1.08075e-29 | 1.000000 | 1.08075e-29 | 1.000000 |
| PAH7+H                        | 5.59559e-30 | 1.000000 | 5.59559e-30 | 1.000000 |
| rad59                         | 2.38028e-30 | 1.000000 | 2.38028e-30 | 1.000000 |
| rad38                         | 4.48983e-31 | 1.000000 | 4.48983e-31 | 1.000000 |
| PAH10+CH3                     | 1.23425e-31 | 1.000000 | 1.23425e-31 | 1.000000 |
| rad43                         | 1.37694e-33 | 1.000000 | 1.37694e-33 | 1.000000 |
| rad46                         | 3.53189e-34 | 1.000000 | 3.53189e-34 | 1.000000 |
| rad54                         | 4.52152e-35 | 1.000000 | 4.52152e-35 | 1.000000 |
| rad58                         | 4.23896e-35 | 1.000000 | 4.23896e-35 | 1.000000 |
| rad70                         | 1.90082e-35 | 1.000000 | 1.90082e-35 | 1.000000 |
| PAH1+H                        | 2.80943e-36 | 1.000000 | 2.80943e-36 | 1.000000 |
| PAH9+H                        | 2.30092e-36 | 1.000000 | 2.30092e-36 | 1.000000 |
| rad50                         | 9.40177e-37 | 1.000000 | 9.40177e-37 | 1.000000 |
| rad55                         | 2.09714e-37 | 1.000000 | 2.09714e-37 | 1.000000 |
| rad34                         | 1.23387e-37 | 1.000000 | 1.23387e-37 | 1.000000 |
| rad39                         | 1.16332e-37 | 1.000000 | 1.16332e-37 | 1.000000 |
| rad41                         | 6.89629e-39 | 1.000000 | 6.89629e-39 | 1.000000 |
| rad52                         | 4.11402e-40 | 1.000000 | 4.11402e-40 | 1.000000 |
| rad62                         | 2.25014e-40 | 1.000000 | 2.25014e-40 | 1.000000 |
| rad51                         | 6.14128e-41 | 1.000000 | 6.14128e-41 | 1.000000 |
| Benzene+cycloprop-1-enylidene | 1.10663e-41 | 1.000000 | 1.10663e-41 | 1.000000 |
| rad47                         | 8.85622e-42 | 1.000000 | 8.85622e-42 | 1.000000 |
| rad53                         | 6.94708e-45 | 1.000000 | 6.94708e-45 | 1.000000 |
| rad42                         | 4.97551e-45 | 1.000000 | 4.97551e-45 | 1.000000 |
| rad65                         | 1.64302e-45 | 1.000000 | 1.64302e-45 | 1.000000 |
| rad61                         | 8.51936e-47 | 1.000000 | 8.51936e-47 | 1.000000 |
| rad68syn                      | 1.14450e-50 | 1.000000 | 1.14450e-50 | 1.000000 |
| rad68anti                     | 9.29787e-51 | 1.000000 | 9.29787e-51 | 1.000000 |
| rad56                         | 2.39455e-51 | 1.000000 | 2.39455e-51 | 1.000000 |
| rad64                         | 7.08475e-53 | 1.000000 | 7.08475e-53 | 1.000000 |
| rad40syn                      | 5.46210e-56 | 1.000000 | 5.46210e-56 | 1.000000 |
| rad40anti                     | 4.12556e-56 | 1.000000 | 4.12556e-56 | 1.000000 |
| PAH8+H                        | 1.58173e-58 | 1.000000 | 1.58173e-58 | 1.000000 |
| rad73                         | 1.26901e-61 | 1.000000 | 1.26901e-61 | 1.000000 |
| rad71                         | 1.37315e-66 | 1.000000 | 1.37315e-66 | 1.000000 |

100000000. Pa, 50.0000000 K

| Rate constant             | True (fraction)        | Effective (fraction)   |
|---------------------------|------------------------|------------------------|
| Total                     | 1.72707e-17 (1.00 )    | 1.72707e-17 (1.00 )    |
| Formation of rad19        | 1.72707e-17 (1.00 )    | 1.72707e-17 (1.00 )    |
| H-abstraction to cyc2enyl | 5.49905e-35 (3.18e-18) | 5.49905e-35 (3.18e-18) |
| H-abstraction to cyclenyl | 4.93090e-50 (2.86e-33) | 4.93090e-50 (2.86e-33) |
| species                   | PYtrue                 | Cumul                  |
| species                   | PYeffective            | Cumul                  |

|                               |             |          |             |          |
|-------------------------------|-------------|----------|-------------|----------|
| rad19anti                     | 0.992414    | 0.992414 | 0.992414    | 0.992414 |
| rad9                          | 0.00485849  | 0.997272 | 0.00485849  | 0.997272 |
| rad8                          | 0.00188556  | 0.999158 | 0.00188556  | 0.999158 |
| rad19syn                      | 0.000841486 | 1.000000 | 0.000841486 | 1.000000 |
| rad12                         | 1.82901e-08 | 1.000000 | 1.82901e-08 | 1.000000 |
| rad15                         | 1.13061e-08 | 1.000000 | 1.13061e-08 | 1.000000 |
| rad7                          | 3.14502e-11 | 1.000000 | 3.14502e-11 | 1.000000 |
| Indene+H                      | 4.95117e-13 | 1.000000 | 4.95117e-13 | 1.000000 |
| PhCHCCH2+H                    | 7.32185e-14 | 1.000000 | 7.32185e-14 | 1.000000 |
| rad6                          | 3.59551e-15 | 1.000000 | 3.59551e-15 | 1.000000 |
| rad2                          | 3.23004e-15 | 1.000000 | 3.23004e-15 | 1.000000 |
| rad11                         | 2.62790e-15 | 1.000000 | 2.62790e-15 | 1.000000 |
| rad5                          | 1.23557e-15 | 1.000000 | 1.23557e-15 | 1.000000 |
| rad1                          | 1.14680e-15 | 1.000000 | 1.14680e-15 | 1.000000 |
| PhcycC3H3_A+H                 | 5.87159e-16 | 1.000000 | 5.87159e-16 | 1.000000 |
| rad21                         | 1.73960e-16 | 1.000000 | 1.73960e-16 | 1.000000 |
| rad20                         | 1.40361e-16 | 1.000000 | 1.40361e-16 | 1.000000 |
| Phenyl+cycC3H4                | 8.78414e-17 | 1.000000 | 0.00000     | 1.000000 |
| rad26                         | 8.22272e-18 | 1.000000 | 8.22272e-18 | 1.000000 |
| Benzene+cycloprop-2-enylidene | 3.18404e-18 | 1.000000 | 3.18404e-18 | 1.000000 |
| rad18                         | 3.01218e-18 | 1.000000 | 3.01218e-18 | 1.000000 |
| rad22                         | 2.01356e-19 | 1.000000 | 2.01356e-19 | 1.000000 |
| rad24                         | 4.93711e-20 | 1.000000 | 4.93711e-20 | 1.000000 |
| C2H2+PhCH2                    | 3.09797e-20 | 1.000000 | 3.09797e-20 | 1.000000 |
| rad67                         | 2.64346e-20 | 1.000000 | 2.64346e-20 | 1.000000 |
| rad35                         | 1.23377e-20 | 1.000000 | 1.23377e-20 | 1.000000 |
| PhCCH+CH3                     | 5.76189e-21 | 1.000000 | 5.76189e-21 | 1.000000 |
| rad10                         | 5.30429e-21 | 1.000000 | 5.30429e-21 | 1.000000 |
| rad45                         | 2.97518e-21 | 1.000000 | 2.97518e-21 | 1.000000 |
| rad3                          | 1.02315e-21 | 1.000000 | 1.02315e-21 | 1.000000 |
| PhcycC3H3_B+H                 | 8.44807e-22 | 1.000000 | 8.44807e-22 | 1.000000 |
| rad13                         | 8.40367e-22 | 1.000000 | 8.40367e-22 | 1.000000 |
| rad4                          | 7.93522e-22 | 1.000000 | 7.93522e-22 | 1.000000 |
| rad31                         | 7.38411e-22 | 1.000000 | 7.38411e-22 | 1.000000 |
| rad36                         | 7.07480e-22 | 1.000000 | 7.07480e-22 | 1.000000 |
| PhCCCH3+H                     | 3.96944e-22 | 1.000000 | 3.96944e-22 | 1.000000 |
| Ph+MeAc                       | 2.34658e-22 | 1.000000 | 2.34658e-22 | 1.000000 |
| rad25                         | 6.79220e-23 | 1.000000 | 6.79220e-23 | 1.000000 |
| rad27                         | 6.49876e-23 | 1.000000 | 6.49876e-23 | 1.000000 |
| Ph+Allene                     | 3.76003e-23 | 1.000000 | 3.76003e-23 | 1.000000 |
| rad33                         | 1.75637e-23 | 1.000000 | 1.75637e-23 | 1.000000 |
| PhCH2CCH+H                    | 5.39851e-24 | 1.000000 | 5.39851e-24 | 1.000000 |
| rad23                         | 7.15026e-25 | 1.000000 | 7.15026e-25 | 1.000000 |
| rad30                         | 7.41071e-26 | 1.000000 | 7.41071e-26 | 1.000000 |
| rad37                         | 1.12245e-27 | 1.000000 | 1.12245e-27 | 1.000000 |
| rad28                         | 1.00971e-27 | 1.000000 | 1.00971e-27 | 1.000000 |
| rad60syn                      | 1.77496e-28 | 1.000000 | 1.77496e-28 | 1.000000 |
| rad60anti                     | 8.29213e-29 | 1.000000 | 8.29213e-29 | 1.000000 |
| rad14                         | 7.50951e-29 | 1.000000 | 7.50951e-29 | 1.000000 |
| PAH3+H                        | 4.25342e-29 | 1.000000 | 4.25342e-29 | 1.000000 |
| PAH7+H                        | 2.05436e-29 | 1.000000 | 2.05436e-29 | 1.000000 |
| rad59                         | 9.34338e-30 | 1.000000 | 9.34338e-30 | 1.000000 |
| rad38                         | 1.80457e-30 | 1.000000 | 1.80457e-30 | 1.000000 |
| PAH10+CH3                     | 5.09345e-31 | 1.000000 | 5.09345e-31 | 1.000000 |
| rad43                         | 4.39212e-33 | 1.000000 | 4.39212e-33 | 1.000000 |
| Benzene+cycloprop-1-enylidene | 2.85507e-33 | 1.000000 | 2.85507e-33 | 1.000000 |
| rad46                         | 1.63900e-33 | 1.000000 | 1.63900e-33 | 1.000000 |
| rad58                         | 1.80111e-34 | 1.000000 | 1.80111e-34 | 1.000000 |
| rad54                         | 1.45775e-34 | 1.000000 | 1.45775e-34 | 1.000000 |
| rad70                         | 8.16857e-35 | 1.000000 | 8.16857e-35 | 1.000000 |
| PAH1+H                        | 1.26438e-35 | 1.000000 | 1.26438e-35 | 1.000000 |
| PAH9+H                        | 1.09175e-35 | 1.000000 | 1.09175e-35 | 1.000000 |
| rad50                         | 4.48682e-36 | 1.000000 | 4.48682e-36 | 1.000000 |
| rad55                         | 6.98460e-37 | 1.000000 | 6.98460e-37 | 1.000000 |
| rad34                         | 5.60151e-37 | 1.000000 | 5.60151e-37 | 1.000000 |
| rad39                         | 5.52937e-37 | 1.000000 | 5.52937e-37 | 1.000000 |
| rad41                         | 2.56973e-38 | 1.000000 | 2.56973e-38 | 1.000000 |
| rad52                         | 2.55361e-39 | 1.000000 | 2.55361e-39 | 1.000000 |
| rad62                         | 1.18804e-39 | 1.000000 | 1.18804e-39 | 1.000000 |
| rad51                         | 3.92580e-40 | 1.000000 | 3.92580e-40 | 1.000000 |
| rad47                         | 4.84145e-41 | 1.000000 | 4.84145e-41 | 1.000000 |
| rad53                         | 3.69175e-44 | 1.000000 | 3.69175e-44 | 1.000000 |
| rad42                         | 3.05744e-44 | 1.000000 | 3.05744e-44 | 1.000000 |
| rad65                         | 8.51349e-45 | 1.000000 | 8.51349e-45 | 1.000000 |
| rad61                         | 7.78445e-46 | 1.000000 | 7.78445e-46 | 1.000000 |
| rad68syn                      | 1.22971e-49 | 1.000000 | 1.22971e-49 | 1.000000 |
| rad68anti                     | 9.97463e-50 | 1.000000 | 9.97463e-50 | 1.000000 |
| rad56                         | 1.83835e-50 | 1.000000 | 1.83835e-50 | 1.000000 |
| rad64                         | 6.40947e-52 | 1.000000 | 6.40947e-52 | 1.000000 |
| rad40syn                      | 6.77032e-55 | 1.000000 | 6.77032e-55 | 1.000000 |

|           |             |          |             |          |
|-----------|-------------|----------|-------------|----------|
| rad40anti | 5.04410e-55 | 1.000000 | 5.04410e-55 | 1.000000 |
| PAH8+H    | 2.51729e-57 | 1.000000 | 2.51729e-57 | 1.000000 |
| rad73     | 2.77183e-60 | 1.000000 | 2.77183e-60 | 1.000000 |
| rad71     | 4.11232e-65 | 1.000000 | 4.11232e-65 | 1.000000 |

100000000. Pa, 60.0000000 K

=====

| Rate constant             | True (fraction)        | Effective (fraction)   |
|---------------------------|------------------------|------------------------|
| Total                     | 6.93738e-17 (1.00 )    | 6.93738e-17 (1.00 )    |
| Formation of rad19        | 6.93738e-17 (1.000 )   | 6.93738e-17 (1.000 )   |
| H-abstraction to cyc2enyl | 2.50609e-31 (3.61e-15) | 2.50609e-31 (3.61e-15) |
| H-abstraction to cyclenyl | 7.62015e-44 (1.10e-27) | 7.62015e-44 (1.10e-27) |

| species                       | PYtrue      | Cumul    | PYeffective | Cumul    |
|-------------------------------|-------------|----------|-------------|----------|
| rad19anti                     | 0.991453    | 0.991453 | 0.991453    | 0.991453 |
| rad9                          | 0.00638887  | 0.997842 | 0.00638887  | 0.997842 |
| rad8                          | 0.00194425  | 0.999786 | 0.00194425  | 0.999786 |
| rad19syn                      | 0.000213569 | 1.000000 | 0.000213569 | 1.000000 |
| rad12                         | 3.01237e-08 | 1.000000 | 3.01237e-08 | 1.000000 |
| rad15                         | 1.90245e-08 | 1.000000 | 1.90245e-08 | 1.000000 |
| rad7                          | 3.75209e-11 | 1.000000 | 3.75209e-11 | 1.000000 |
| Indene+H                      | 1.05377e-12 | 1.000000 | 1.05377e-12 | 1.000000 |
| PhCHCCH2+H                    | 1.23852e-13 | 1.000000 | 1.23852e-13 | 1.000000 |
| rad6                          | 5.37464e-15 | 1.000000 | 5.37464e-15 | 1.000000 |
| rad2                          | 5.27570e-15 | 1.000000 | 5.27570e-15 | 1.000000 |
| rad11                         | 4.69666e-15 | 1.000000 | 4.69666e-15 | 1.000000 |
| Benzene+cycloprop-2-enylidene | 3.61245e-15 | 1.000000 | 3.61245e-15 | 1.000000 |
| rad5                          | 1.78751e-15 | 1.000000 | 1.78751e-15 | 1.000000 |
| rad1                          | 1.76740e-15 | 1.000000 | 1.76740e-15 | 1.000000 |
| PhcycC3H3_A+H                 | 8.86760e-16 | 1.000000 | 8.86760e-16 | 1.000000 |
| rad21                         | 2.99993e-16 | 1.000000 | 2.99993e-16 | 1.000000 |
| rad20                         | 2.04181e-16 | 1.000000 | 2.04181e-16 | 1.000000 |
| Phenyl+cycC3H4                | 1.74045e-16 | 1.000000 | 0.000000    | 1.000000 |
| rad26                         | 1.81234e-17 | 1.000000 | 1.81234e-17 | 1.000000 |
| rad18                         | 6.60293e-18 | 1.000000 | 6.60293e-18 | 1.000000 |
| rad22                         | 4.30306e-19 | 1.000000 | 4.30306e-19 | 1.000000 |
| rad24                         | 1.04088e-19 | 1.000000 | 1.04088e-19 | 1.000000 |
| rad67                         | 5.97657e-20 | 1.000000 | 5.97657e-20 | 1.000000 |
| C2H2+PhCH2                    | 5.69661e-20 | 1.000000 | 5.69661e-20 | 1.000000 |
| rad35                         | 2.78313e-20 | 1.000000 | 2.78313e-20 | 1.000000 |
| PhCCH+CH3                     | 1.06412e-20 | 1.000000 | 1.06412e-20 | 1.000000 |
| rad10                         | 1.02282e-20 | 1.000000 | 1.02282e-20 | 1.000000 |
| rad45                         | 7.82718e-21 | 1.000000 | 7.82718e-21 | 1.000000 |
| PhcycC3H3_B+H                 | 2.71193e-21 | 1.000000 | 2.71193e-21 | 1.000000 |
| rad3                          | 2.05459e-21 | 1.000000 | 2.05459e-21 | 1.000000 |
| rad36                         | 1.82369e-21 | 1.000000 | 1.82369e-21 | 1.000000 |
| rad4                          | 1.64233e-21 | 1.000000 | 1.64233e-21 | 1.000000 |
| rad13                         | 1.58030e-21 | 1.000000 | 1.58030e-21 | 1.000000 |
| rad31                         | 9.71904e-22 | 1.000000 | 9.71904e-22 | 1.000000 |
| PhCCCH3+H                     | 8.25434e-22 | 1.000000 | 8.25434e-22 | 1.000000 |
| Ph+MeAc                       | 5.26040e-22 | 1.000000 | 5.26040e-22 | 1.000000 |
| rad25                         | 1.54962e-22 | 1.000000 | 1.54962e-22 | 1.000000 |
| rad27                         | 1.25478e-22 | 1.000000 | 1.25478e-22 | 1.000000 |
| Ph+Allene                     | 8.75758e-23 | 1.000000 | 8.75758e-23 | 1.000000 |
| rad33                         | 3.31498e-23 | 1.000000 | 3.31498e-23 | 1.000000 |
| PhCH2CCH+H                    | 1.26818e-23 | 1.000000 | 1.26818e-23 | 1.000000 |
| rad23                         | 1.92388e-24 | 1.000000 | 1.92388e-24 | 1.000000 |
| rad30                         | 2.08062e-25 | 1.000000 | 2.08062e-25 | 1.000000 |
| rad37                         | 3.24492e-27 | 1.000000 | 3.24492e-27 | 1.000000 |
| rad28                         | 2.63974e-27 | 1.000000 | 2.63974e-27 | 1.000000 |
| Benzene+cycloprop-1-enylidene | 1.09842e-27 | 1.000000 | 1.09842e-27 | 1.000000 |
| rad60syn                      | 5.07922e-28 | 1.000000 | 5.07922e-28 | 1.000000 |
| rad60anti                     | 2.37690e-28 | 1.000000 | 2.37690e-28 | 1.000000 |
| rad14                         | 1.99298e-28 | 1.000000 | 1.99298e-28 | 1.000000 |
| PAH3+H                        | 1.24497e-28 | 1.000000 | 1.24497e-28 | 1.000000 |
| PAH7+H                        | 5.76305e-29 | 1.000000 | 5.76305e-29 | 1.000000 |
| rad59                         | 2.72679e-29 | 1.000000 | 2.72679e-29 | 1.000000 |
| rad38                         | 5.39307e-30 | 1.000000 | 5.39307e-30 | 1.000000 |
| PAH10+CH3                     | 1.56836e-30 | 1.000000 | 1.56836e-30 | 1.000000 |
| rad43                         | 1.11964e-32 | 1.000000 | 1.11964e-32 | 1.000000 |
| rad46                         | 5.49295e-33 | 1.000000 | 5.49295e-33 | 1.000000 |
| rad58                         | 5.74755e-34 | 1.000000 | 5.74755e-34 | 1.000000 |
| rad54                         | 3.74115e-34 | 1.000000 | 3.74115e-34 | 1.000000 |
| rad70                         | 2.63239e-34 | 1.000000 | 2.63239e-34 | 1.000000 |
| PAH1+H                        | 4.29501e-35 | 1.000000 | 4.29501e-35 | 1.000000 |
| PAH9+H                        | 3.73621e-35 | 1.000000 | 3.73621e-35 | 1.000000 |
| rad50                         | 1.55363e-35 | 1.000000 | 1.55363e-35 | 1.000000 |
| rad34                         | 1.92117e-36 | 1.000000 | 1.92117e-36 | 1.000000 |



|           |             |          |             |          |
|-----------|-------------|----------|-------------|----------|
| rad39     | 1.91716e-36 | 1.000000 | 1.91716e-36 | 1.000000 |
| rad55     | 1.86009e-36 | 1.000000 | 1.86009e-36 | 1.000000 |
| rad41     | 7.79489e-38 | 1.000000 | 7.79489e-38 | 1.000000 |
| rad52     | 1.08595e-38 | 1.000000 | 1.08595e-38 | 1.000000 |
| rad62     | 4.47333e-39 | 1.000000 | 4.47333e-39 | 1.000000 |
| rad51     | 1.72710e-39 | 1.000000 | 1.72710e-39 | 1.000000 |
| rad47     | 1.96260e-40 | 1.000000 | 1.96260e-40 | 1.000000 |
| rad53     | 1.71068e-43 | 1.000000 | 1.71068e-43 | 1.000000 |
| rad42     | 1.36471e-43 | 1.000000 | 1.36471e-43 | 1.000000 |
| rad65     | 3.23732e-44 | 1.000000 | 3.23732e-44 | 1.000000 |
| rad61     | 6.19858e-45 | 1.000000 | 6.19858e-45 | 1.000000 |
| rad68syn  | 1.19694e-48 | 1.000000 | 1.19694e-48 | 1.000000 |
| rad68anti | 9.68989e-49 | 1.000000 | 9.68989e-49 | 1.000000 |
| rad56     | 1.34994e-49 | 1.000000 | 1.34994e-49 | 1.000000 |
| rad64     | 4.60987e-51 | 1.000000 | 4.60987e-51 | 1.000000 |
| rad40syn  | 8.87509e-54 | 1.000000 | 8.87509e-54 | 1.000000 |
| rad40anti | 6.53815e-54 | 1.000000 | 6.53815e-54 | 1.000000 |
| PAH8+H    | 4.32191e-56 | 1.000000 | 4.32191e-56 | 1.000000 |
| rad73     | 5.17313e-59 | 1.000000 | 5.17313e-59 | 1.000000 |
| rad71     | 1.13397e-63 | 1.000000 | 1.13397e-63 | 1.000000 |

100000000. Pa, 70.0000000 K

| Rate constant             | True (fraction)        | Effective (fraction)   |
|---------------------------|------------------------|------------------------|
| Total                     | 1.91520e-16 (1.00 )    | 1.91520e-16 (1.00 )    |
| Formation of rad19        | 1.91520e-16 (1.000 )   | 1.91520e-16 (1.000 )   |
| H-abstraction to cyc2enyl | 1.01125e-28 (5.28e-13) | 1.01125e-28 (5.28e-13) |
| H-abstraction to cyclenyl | 1.97822e-39 (1.03e-23) | 1.97822e-39 (1.03e-23) |

| species                       | PYtrue      | Cumul    | PYeffective | Cumul    |
|-------------------------------|-------------|----------|-------------|----------|
| rad19anti                     | 0.990039    | 0.990039 | 0.990039    | 0.990039 |
| rad9                          | 0.00792644  | 0.997965 | 0.00792644  | 0.997965 |
| rad8                          | 0.00197335  | 0.999939 | 0.00197335  | 0.999939 |
| rad19syn                      | 6.10776e-05 | 1.000000 | 6.10776e-05 | 1.000000 |
| rad12                         | 4.47500e-08 | 1.000000 | 4.47500e-08 | 1.000000 |
| rad15                         | 2.88647e-08 | 1.000000 | 2.88647e-08 | 1.000000 |
| rad7                          | 4.35272e-11 | 1.000000 | 4.35272e-11 | 1.000000 |
| Indene+H                      | 1.93940e-12 | 1.000000 | 1.93940e-12 | 1.000000 |
| Benzene+cycloprop-2-enylidene | 5.28015e-13 | 1.000000 | 5.28015e-13 | 1.000000 |
| PhCHCCH2+H                    | 1.91337e-13 | 1.000000 | 1.91337e-13 | 1.000000 |
| rad2                          | 7.94505e-15 | 1.000000 | 7.94505e-15 | 1.000000 |
| rad11                         | 7.54997e-15 | 1.000000 | 7.54997e-15 | 1.000000 |
| rad6                          | 7.51058e-15 | 1.000000 | 7.51058e-15 | 1.000000 |
| rad1                          | 2.53823e-15 | 1.000000 | 2.53823e-15 | 1.000000 |
| rad5                          | 2.41857e-15 | 1.000000 | 2.41857e-15 | 1.000000 |
| PhcycC3H3_A+H                 | 1.30593e-15 | 1.000000 | 1.30593e-15 | 1.000000 |
| rad21                         | 4.72495e-16 | 1.000000 | 4.72495e-16 | 1.000000 |
| Phenyl+cycC3H4                | 3.26585e-16 | 1.000000 | 0.000000    | 1.000000 |
| rad20                         | 2.77869e-16 | 1.000000 | 2.77869e-16 | 1.000000 |
| rad26                         | 3.45363e-17 | 1.000000 | 3.45363e-17 | 1.000000 |
| rad18                         | 1.25311e-17 | 1.000000 | 1.25311e-17 | 1.000000 |
| rad22                         | 8.08113e-19 | 1.000000 | 8.08113e-19 | 1.000000 |
| rad24                         | 1.92983e-19 | 1.000000 | 1.92983e-19 | 1.000000 |
| rad67                         | 1.16881e-19 | 1.000000 | 1.16881e-19 | 1.000000 |
| C2H2+PhCH2                    | 9.42031e-20 | 1.000000 | 9.42031e-20 | 1.000000 |
| rad35                         | 5.43011e-20 | 1.000000 | 5.43011e-20 | 1.000000 |
| rad10                         | 1.78228e-20 | 1.000000 | 1.78228e-20 | 1.000000 |
| PhCCH+CH3                     | 1.76754e-20 | 1.000000 | 1.76754e-20 | 1.000000 |
| rad45                         | 1.74301e-20 | 1.000000 | 1.74301e-20 | 1.000000 |
| PhcycC3H3_B+H                 | 8.96088e-21 | 1.000000 | 8.96088e-21 | 1.000000 |
| rad36                         | 3.96064e-21 | 1.000000 | 3.96064e-21 | 1.000000 |
| rad3                          | 3.68723e-21 | 1.000000 | 3.68723e-21 | 1.000000 |
| rad4                          | 2.98061e-21 | 1.000000 | 2.98061e-21 | 1.000000 |
| rad13                         | 2.67305e-21 | 1.000000 | 2.67305e-21 | 1.000000 |
| PhCCCH3+H                     | 1.52402e-21 | 1.000000 | 1.52402e-21 | 1.000000 |
| rad31                         | 1.19882e-21 | 1.000000 | 1.19882e-21 | 1.000000 |
| Ph+MeAc                       | 1.02548e-21 | 1.000000 | 1.02548e-21 | 1.000000 |
| rad25                         | 3.05955e-22 | 1.000000 | 3.05955e-22 | 1.000000 |
| rad27                         | 2.19170e-22 | 1.000000 | 2.19170e-22 | 1.000000 |
| Ph+Allene                     | 1.76744e-22 | 1.000000 | 1.76744e-22 | 1.000000 |
| rad33                         | 5.62961e-23 | 1.000000 | 5.62961e-23 | 1.000000 |
| PhCH2CCH+H                    | 2.58670e-23 | 1.000000 | 2.58670e-23 | 1.000000 |
| Benzene+cycloprop-1-enylidene | 1.03290e-23 | 1.000000 | 1.03290e-23 | 1.000000 |
| rad23                         | 4.38256e-24 | 1.000000 | 4.38256e-24 | 1.000000 |
| rad30                         | 4.86603e-25 | 1.000000 | 4.86603e-25 | 1.000000 |
| rad37                         | 7.82218e-27 | 1.000000 | 7.82218e-27 | 1.000000 |
| rad28                         | 5.91441e-27 | 1.000000 | 5.91441e-27 | 1.000000 |
| rad60syn                      | 1.21231e-27 | 1.000000 | 1.21231e-27 | 1.000000 |

|           |             |          |             |          |
|-----------|-------------|----------|-------------|----------|
| rad60anti | 5.68349e-28 | 1.000000 | 5.68349e-28 | 1.000000 |
| rad14     | 4.48536e-28 | 1.000000 | 4.48536e-28 | 1.000000 |
| PAH3+H    | 3.04496e-28 | 1.000000 | 3.04496e-28 | 1.000000 |
| PAH7+H    | 1.37122e-28 | 1.000000 | 1.37122e-28 | 1.000000 |
| rad59     | 6.64781e-29 | 1.000000 | 6.64781e-29 | 1.000000 |
| rad38     | 1.34757e-29 | 1.000000 | 1.34757e-29 | 1.000000 |
| PAH10+CH3 | 4.04969e-30 | 1.000000 | 4.04969e-30 | 1.000000 |
| rad43     | 2.50014e-32 | 1.000000 | 2.50014e-32 | 1.000000 |
| rad46     | 1.50839e-32 | 1.000000 | 1.50839e-32 | 1.000000 |
| rad58     | 1.54490e-33 | 1.000000 | 1.54490e-33 | 1.000000 |
| rad54     | 8.38085e-34 | 1.000000 | 8.38085e-34 | 1.000000 |
| rad70     | 7.14457e-34 | 1.000000 | 7.14457e-34 | 1.000000 |
| PAH1+H    | 1.23454e-34 | 1.000000 | 1.23454e-34 | 1.000000 |
| PAH9+H    | 1.04664e-34 | 1.000000 | 1.04664e-34 | 1.000000 |
| rad50     | 4.42499e-35 | 1.000000 | 4.42499e-35 | 1.000000 |
| rad34     | 5.58166e-36 | 1.000000 | 5.58166e-36 | 1.000000 |
| rad39     | 5.48583e-36 | 1.000000 | 5.48583e-36 | 1.000000 |
| rad55     | 4.34052e-36 | 1.000000 | 4.34052e-36 | 1.000000 |
| rad41     | 2.09995e-37 | 1.000000 | 2.09995e-37 | 1.000000 |
| rad52     | 3.67194e-38 | 1.000000 | 3.67194e-38 | 1.000000 |
| rad62     | 1.37975e-38 | 1.000000 | 1.37975e-38 | 1.000000 |
| rad51     | 6.06454e-39 | 1.000000 | 6.06454e-39 | 1.000000 |
| rad47     | 6.66431e-40 | 1.000000 | 6.66431e-40 | 1.000000 |
| rad53     | 7.39722e-43 | 1.000000 | 7.39722e-43 | 1.000000 |
| rad42     | 5.06062e-43 | 1.000000 | 5.06062e-43 | 1.000000 |
| rad65     | 1.02268e-43 | 1.000000 | 1.02268e-43 | 1.000000 |
| rad61     | 4.63396e-44 | 1.000000 | 4.63396e-44 | 1.000000 |
| rad68syn  | 1.12559e-47 | 1.000000 | 1.12559e-47 | 1.000000 |
| rad68anti | 9.09165e-48 | 1.000000 | 9.09165e-48 | 1.000000 |
| rad56     | 9.89681e-49 | 1.000000 | 9.89681e-49 | 1.000000 |
| rad64     | 2.92359e-50 | 1.000000 | 2.92359e-50 | 1.000000 |
| rad40syn  | 1.24135e-52 | 1.000000 | 1.24135e-52 | 1.000000 |
| rad40anti | 9.05609e-53 | 1.000000 | 9.05609e-53 | 1.000000 |
| PAH8+H    | 8.05260e-55 | 1.000000 | 8.05260e-55 | 1.000000 |
| rad73     | 9.05820e-58 | 1.000000 | 9.05820e-58 | 1.000000 |
| rad71     | 3.10172e-62 | 1.000000 | 3.10172e-62 | 1.000000 |

10000000. Pa, 80.000000 K

| Rate constant             | True (fraction)        | Effective (fraction)   |
|---------------------------|------------------------|------------------------|
| Total                     | 4.17084e-16 (1.00 )    | 4.17084e-16 (1.00 )    |
| Formation of rad19        | 4.17084e-16 (1.000 )   | 4.17084e-16 (1.000 )   |
| H-abstraction to cyc2enyl | 8.98751e-27 (2.15e-11) | 8.98751e-27 (2.15e-11) |
| H-abstraction to cyc1enyl | 4.00120e-36 (9.59e-21) | 4.00120e-36 (9.59e-21) |

| species                       | PYtrue      | Cumul    | PYeffective | Cumul    |
|-------------------------------|-------------|----------|-------------|----------|
| rad19anti                     | 0.988526    | 0.988526 | 0.988526    | 0.988526 |
| rad9                          | 0.00946934  | 0.997995 | 0.00946934  | 0.997995 |
| rad8                          | 0.00198493  | 0.999980 | 0.00198493  | 0.999980 |
| rad19syn                      | 1.93729e-05 | 1.000000 | 1.93729e-05 | 1.000000 |
| rad12                         | 6.20998e-08 | 1.000000 | 6.20998e-08 | 1.000000 |
| rad15                         | 4.08997e-08 | 1.000000 | 4.08997e-08 | 1.000000 |
| rad7                          | 4.96264e-11 | 1.000000 | 4.96264e-11 | 1.000000 |
| Benzene+cycloprop-2-enylidene | 2.15484e-11 | 1.000000 | 2.15484e-11 | 1.000000 |
| Indene+H                      | 3.24061e-12 | 1.000000 | 3.24061e-12 | 1.000000 |
| PhCHCCH2+H                    | 2.78209e-13 | 1.000000 | 2.78209e-13 | 1.000000 |
| rad2                          | 1.13305e-14 | 1.000000 | 1.13305e-14 | 1.000000 |
| rad11                         | 1.13189e-14 | 1.000000 | 1.13189e-14 | 1.000000 |
| rad6                          | 1.00457e-14 | 1.000000 | 1.00457e-14 | 1.000000 |
| rad1                          | 3.48209e-15 | 1.000000 | 3.48209e-15 | 1.000000 |
| rad5                          | 3.13281e-15 | 1.000000 | 3.13281e-15 | 1.000000 |
| PhcycC3H3_A+H                 | 1.89459e-15 | 1.000000 | 1.89459e-15 | 1.000000 |
| rad21                         | 7.00563e-16 | 1.000000 | 7.00563e-16 | 1.000000 |
| Phenyl+cycC3H4                | 5.84536e-16 | 1.000000 | 0.00000     | 1.000000 |
| rad20                         | 3.62147e-16 | 1.000000 | 3.62147e-16 | 1.000000 |
| rad26                         | 5.97656e-17 | 1.000000 | 5.97656e-17 | 1.000000 |
| rad18                         | 2.16115e-17 | 1.000000 | 2.16115e-17 | 1.000000 |
| rad22                         | 1.39211e-18 | 1.000000 | 1.39211e-18 | 1.000000 |
| rad24                         | 3.28375e-19 | 1.000000 | 3.28375e-19 | 1.000000 |
| rad67                         | 2.07696e-19 | 1.000000 | 2.07696e-19 | 1.000000 |
| C2H2+PhCH2                    | 1.45292e-19 | 1.000000 | 1.45292e-19 | 1.000000 |
| rad35                         | 9.62593e-20 | 1.000000 | 9.62593e-20 | 1.000000 |
| rad45                         | 3.46978e-20 | 1.000000 | 3.46978e-20 | 1.000000 |
| PhcycC3H3_B+H                 | 2.99513e-20 | 1.000000 | 2.99513e-20 | 1.000000 |
| rad10                         | 2.90403e-20 | 1.000000 | 2.90403e-20 | 1.000000 |
| PhCCH+CH3                     | 2.73857e-20 | 1.000000 | 2.73857e-20 | 1.000000 |
| Benzene+cycloprop-1-enylidene | 9.59328e-21 | 1.000000 | 9.59328e-21 | 1.000000 |
| rad36                         | 7.68892e-21 | 1.000000 | 7.68892e-21 | 1.000000 |

|            |             |          |             |          |
|------------|-------------|----------|-------------|----------|
| rad3       | 6.14574e-21 | 1.000000 | 6.14574e-21 | 1.000000 |
| rad4       | 4.98079e-21 | 1.000000 | 4.98079e-21 | 1.000000 |
| rad13      | 4.21824e-21 | 1.000000 | 4.21824e-21 | 1.000000 |
| PhCCCH3+H  | 2.60109e-21 | 1.000000 | 2.60109e-21 | 1.000000 |
| Ph+MeAc    | 1.82515e-21 | 1.000000 | 1.82515e-21 | 1.000000 |
| rad31      | 1.42424e-21 | 1.000000 | 1.42424e-21 | 1.000000 |
| rad25      | 5.49184e-22 | 1.000000 | 5.49184e-22 | 1.000000 |
| rad27      | 3.58452e-22 | 1.000000 | 3.58452e-22 | 1.000000 |
| Ph+Allene  | 3.24703e-22 | 1.000000 | 3.24703e-22 | 1.000000 |
| rad33      | 8.92202e-23 | 1.000000 | 8.92202e-23 | 1.000000 |
| PhCH2CCH+H | 4.81018e-23 | 1.000000 | 4.81018e-23 | 1.000000 |
| rad23      | 8.93295e-24 | 1.000000 | 8.93295e-24 | 1.000000 |
| rad30      | 1.00831e-24 | 1.000000 | 1.00831e-24 | 1.000000 |
| rad37      | 1.67310e-26 | 1.000000 | 1.67310e-26 | 1.000000 |
| rad28      | 1.19642e-26 | 1.000000 | 1.19642e-26 | 1.000000 |
| rad60syn   | 2.56702e-27 | 1.000000 | 2.56702e-27 | 1.000000 |
| rad60anti  | 1.20580e-27 | 1.000000 | 1.20580e-27 | 1.000000 |
| rad14      | 9.07522e-28 | 1.000000 | 9.07522e-28 | 1.000000 |
| PAH3+H     | 6.61905e-28 | 1.000000 | 6.61905e-28 | 1.000000 |
| PAH7+H     | 2.92688e-28 | 1.000000 | 2.92688e-28 | 1.000000 |
| rad59      | 1.44005e-28 | 1.000000 | 1.44005e-28 | 1.000000 |
| rad38      | 2.99558e-29 | 1.000000 | 2.99558e-29 | 1.000000 |
| PAH10+CH3  | 9.33008e-30 | 1.000000 | 9.33008e-30 | 1.000000 |
| rad43      | 5.13526e-32 | 1.000000 | 5.13526e-32 | 1.000000 |
| rad46      | 3.63091e-32 | 1.000000 | 3.63091e-32 | 1.000000 |
| rad58      | 3.71890e-33 | 1.000000 | 3.71890e-33 | 1.000000 |
| rad70      | 1.73760e-33 | 1.000000 | 1.73760e-33 | 1.000000 |
| rad54      | 1.72190e-33 | 1.000000 | 1.72190e-33 | 1.000000 |
| PAH1+H     | 3.19180e-34 | 1.000000 | 3.19180e-34 | 1.000000 |
| PAH9+H     | 2.56851e-34 | 1.000000 | 2.56851e-34 | 1.000000 |
| rad50      | 1.10890e-34 | 1.000000 | 1.10890e-34 | 1.000000 |
| rad34      | 1.46064e-35 | 1.000000 | 1.46064e-35 | 1.000000 |
| rad39      | 1.38448e-35 | 1.000000 | 1.38448e-35 | 1.000000 |
| rad55      | 9.32375e-36 | 1.000000 | 9.32375e-36 | 1.000000 |
| rad41      | 5.26747e-37 | 1.000000 | 5.26747e-37 | 1.000000 |
| rad52      | 1.06919e-37 | 1.000000 | 1.06919e-37 | 1.000000 |
| rad62      | 3.75259e-38 | 1.000000 | 3.75259e-38 | 1.000000 |
| rad51      | 1.84058e-38 | 1.000000 | 1.84058e-38 | 1.000000 |
| rad47      | 2.02562e-39 | 1.000000 | 2.02562e-39 | 1.000000 |
| rad53      | 3.07562e-42 | 1.000000 | 3.07562e-42 | 1.000000 |
| rad42      | 1.67542e-42 | 1.000000 | 1.67542e-42 | 1.000000 |
| rad61      | 3.36986e-43 | 1.000000 | 3.36986e-43 | 1.000000 |
| rad65      | 2.87119e-43 | 1.000000 | 2.87119e-43 | 1.000000 |
| rad68syn   | 1.05350e-46 | 1.000000 | 1.05350e-46 | 1.000000 |
| rad68anti  | 8.48742e-47 | 1.000000 | 8.48742e-47 | 1.000000 |
| rad56      | 7.49607e-48 | 1.000000 | 7.49607e-48 | 1.000000 |
| rad64      | 1.72424e-49 | 1.000000 | 1.72424e-49 | 1.000000 |
| rad40syn   | 1.85040e-51 | 1.000000 | 1.85040e-51 | 1.000000 |
| rad40anti  | 1.33796e-51 | 1.000000 | 1.33796e-51 | 1.000000 |
| PAH8+H     | 1.62247e-53 | 1.000000 | 1.62247e-53 | 1.000000 |
| rad73      | 1.55775e-56 | 1.000000 | 1.55775e-56 | 1.000000 |
| rad71      | 8.69296e-61 | 1.000000 | 8.69296e-61 | 1.000000 |

100000000. Pa, 90.0000000 K

| Rate constant             | True (fraction)        | Effective (fraction)   |
|---------------------------|------------------------|------------------------|
| Total                     | 7.74016e-16 (1.00)     | 7.74016e-16 (1.00)     |
| Formation of rad19        | 7.74016e-16 (1.000)    | 7.74016e-16 (1.000)    |
| H-abstraction to cyc2enyl | 2.91736e-25 (3.77e-10) | 2.91736e-25 (3.77e-10) |
| H-abstraction to cyc1enyl | 1.47814e-33 (1.91e-18) | 1.47814e-33 (1.91e-18) |

| species                       | PYtrue      | Cumul    | PYeffective | Cumul    |
|-------------------------------|-------------|----------|-------------|----------|
| rad19anti                     | 0.986988    | 0.986988 | 0.986988    | 0.986988 |
| rad9                          | 0.0110197   | 0.998008 | 0.0110197   | 0.998008 |
| rad8                          | 0.00198560  | 0.999993 | 0.00198560  | 0.999993 |
| rad19syn                      | 6.73286e-06 | 1.00000  | 6.73286e-06 | 1.00000  |
| rad12                         | 8.21509e-08 | 1.00000  | 8.21509e-08 | 1.00000  |
| rad15                         | 5.52342e-08 | 1.00000  | 5.52342e-08 | 1.00000  |
| Benzene+cycloprop-2-enylidene | 3.76912e-10 | 1.00000  | 3.76912e-10 | 1.00000  |
| rad7                          | 5.59530e-11 | 1.00000  | 5.59530e-11 | 1.00000  |
| Indene+H                      | 5.05815e-12 | 1.00000  | 5.05815e-12 | 1.00000  |
| PhCHCCH2+H                    | 3.87644e-13 | 1.00000  | 3.87644e-13 | 1.00000  |
| rad11                         | 1.61661e-14 | 1.00000  | 1.61661e-14 | 1.00000  |
| rad2                          | 1.55520e-14 | 1.00000  | 1.55520e-14 | 1.00000  |
| rad6                          | 1.30412e-14 | 1.00000  | 1.30412e-14 | 1.00000  |
| rad1                          | 4.62752e-15 | 1.00000  | 4.62752e-15 | 1.00000  |
| rad5                          | 3.93828e-15 | 1.00000  | 3.93828e-15 | 1.00000  |
| PhcycC3H3_A+H                 | 2.72513e-15 | 1.00000  | 2.72513e-15 | 1.00000  |

|                               |             |         |             |         |
|-------------------------------|-------------|---------|-------------|---------|
| Phenyl+cycC3H4                | 1.00607e-15 | 1.00000 | 0.00000     | 1.00000 |
| rad21                         | 9.95776e-16 | 1.00000 | 9.95776e-16 | 1.00000 |
| rad20                         | 4.58254e-16 | 1.00000 | 4.58254e-16 | 1.00000 |
| rad26                         | 9.66731e-17 | 1.00000 | 9.66731e-17 | 1.00000 |
| rad18                         | 3.48513e-17 | 1.00000 | 3.48513e-17 | 1.00000 |
| rad22                         | 2.25705e-18 | 1.00000 | 2.25705e-18 | 1.00000 |
| Benzene+cycloprop-1-enylidene | 1.90970e-18 | 1.00000 | 1.90970e-18 | 1.00000 |
| rad24                         | 5.26099e-19 | 1.00000 | 5.26099e-19 | 1.00000 |
| rad67                         | 3.45251e-19 | 1.00000 | 3.45251e-19 | 1.00000 |
| C2H2+PhCH2                    | 2.13546e-19 | 1.00000 | 2.13546e-19 | 1.00000 |
| rad35                         | 1.59608e-19 | 1.00000 | 1.59608e-19 | 1.00000 |
| PhcycC3H3_B+H                 | 9.79135e-20 | 1.00000 | 9.79135e-20 | 1.00000 |
| rad45                         | 6.38111e-20 | 1.00000 | 6.38111e-20 | 1.00000 |
| rad10                         | 4.51475e-20 | 1.00000 | 4.51475e-20 | 1.00000 |
| PhCCH+CH3                     | 4.04397e-20 | 1.00000 | 4.04397e-20 | 1.00000 |
| rad36                         | 1.38098e-20 | 1.00000 | 1.38098e-20 | 1.00000 |
| rad3                          | 9.73097e-21 | 1.00000 | 9.73097e-21 | 1.00000 |
| rad4                          | 7.87503e-21 | 1.00000 | 7.87503e-21 | 1.00000 |
| rad13                         | 6.34622e-21 | 1.00000 | 6.34622e-21 | 1.00000 |
| PhCCCH3+H                     | 4.20428e-21 | 1.00000 | 4.20428e-21 | 1.00000 |
| Ph+MeAc                       | 3.05240e-21 | 1.00000 | 3.05240e-21 | 1.00000 |
| rad31                         | 1.65395e-21 | 1.00000 | 1.65395e-21 | 1.00000 |
| rad25                         | 9.22716e-22 | 1.00000 | 9.22716e-22 | 1.00000 |
| rad27                         | 5.60188e-22 | 1.00000 | 5.60188e-22 | 1.00000 |
| Ph+Allene                     | 5.59153e-22 | 1.00000 | 5.59153e-22 | 1.00000 |
| rad33                         | 1.34849e-22 | 1.00000 | 1.34849e-22 | 1.00000 |
| PhCH2CCH+H                    | 8.39595e-23 | 1.00000 | 8.39595e-23 | 1.00000 |
| rad23                         | 1.68415e-23 | 1.00000 | 1.68415e-23 | 1.00000 |
| rad30                         | 1.92008e-24 | 1.00000 | 1.92008e-24 | 1.00000 |
| rad37                         | 3.29471e-26 | 1.00000 | 3.29471e-26 | 1.00000 |
| rad28                         | 2.25473e-26 | 1.00000 | 2.25473e-26 | 1.00000 |
| rad60syn                      | 5.00227e-27 | 1.00000 | 5.00227e-27 | 1.00000 |
| rad60anti                     | 2.35459e-27 | 1.00000 | 2.35459e-27 | 1.00000 |
| rad14                         | 1.70816e-27 | 1.00000 | 1.70816e-27 | 1.00000 |
| PAH3+H                        | 1.32673e-27 | 1.00000 | 1.32673e-27 | 1.00000 |
| PAH7+H                        | 5.79785e-28 | 1.00000 | 5.79785e-28 | 1.00000 |
| rad59                         | 2.87554e-28 | 1.00000 | 2.87554e-28 | 1.00000 |
| rad38                         | 6.14787e-29 | 1.00000 | 6.14787e-29 | 1.00000 |
| PAH10+CH3                     | 1.99068e-29 | 1.00000 | 1.99068e-29 | 1.00000 |
| rad43                         | 9.99270e-32 | 1.00000 | 9.99270e-32 | 1.00000 |
| rad46                         | 7.97890e-32 | 1.00000 | 7.97890e-32 | 1.00000 |
| rad58                         | 8.31940e-33 | 1.00000 | 8.31940e-33 | 1.00000 |
| rad70                         | 3.93143e-33 | 1.00000 | 3.93143e-33 | 1.00000 |
| rad54                         | 3.34349e-33 | 1.00000 | 3.34349e-33 | 1.00000 |
| PAH1+H                        | 7.70220e-34 | 1.00000 | 7.70220e-34 | 1.00000 |
| PAH9+H                        | 5.75238e-34 | 1.00000 | 5.75238e-34 | 1.00000 |
| rad50                         | 2.54683e-34 | 1.00000 | 2.54683e-34 | 1.00000 |
| rad34                         | 3.57350e-35 | 1.00000 | 3.57350e-35 | 1.00000 |
| rad39                         | 3.20861e-35 | 1.00000 | 3.20861e-35 | 1.00000 |
| rad55                         | 1.90011e-35 | 1.00000 | 1.90011e-35 | 1.00000 |
| rad41                         | 1.26671e-36 | 1.00000 | 1.26671e-36 | 1.00000 |
| rad52                         | 2.81342e-37 | 1.00000 | 2.81342e-37 | 1.00000 |
| rad62                         | 9.40851e-38 | 1.00000 | 9.40851e-38 | 1.00000 |
| rad51                         | 5.06741e-38 | 1.00000 | 5.06741e-38 | 1.00000 |
| rad47                         | 5.74162e-39 | 1.00000 | 5.74162e-39 | 1.00000 |
| rad53                         | 1.24027e-41 | 1.00000 | 1.24027e-41 | 1.00000 |
| rad42                         | 5.17533e-42 | 1.00000 | 5.17533e-42 | 1.00000 |
| rad61                         | 2.42390e-42 | 1.00000 | 2.42390e-42 | 1.00000 |
| rad65                         | 7.46804e-43 | 1.00000 | 7.46804e-43 | 1.00000 |
| rad68syn                      | 9.94997e-46 | 1.00000 | 9.94997e-46 | 1.00000 |
| rad68anti                     | 7.99276e-46 | 1.00000 | 7.99276e-46 | 1.00000 |
| rad56                         | 6.07648e-47 | 1.00000 | 6.07648e-47 | 1.00000 |
| rad64                         | 9.73631e-49 | 1.00000 | 9.73631e-49 | 1.00000 |
| rad40syn                      | 2.93063e-50 | 1.00000 | 2.93063e-50 | 1.00000 |
| rad40anti                     | 2.10127e-50 | 1.00000 | 2.10127e-50 | 1.00000 |
| PAH8+H                        | 3.51567e-52 | 1.00000 | 3.51567e-52 | 1.00000 |
| rad73                         | 2.69816e-55 | 1.00000 | 2.69816e-55 | 1.00000 |
| rad71                         | 2.53557e-59 | 1.00000 | 2.53557e-59 | 1.00000 |

100000000. Pa, 100.000000 K

| Rate constant             | True (fraction)        | Effective (fraction)   |
|---------------------------|------------------------|------------------------|
| Total                     | 1.28255e-15 (1.00)     | 1.28255e-15 (1.00)     |
| Formation of rad19        | 1.28255e-15 (1.000)    | 1.28255e-15 (1.000)    |
| H-abstraction to cyc2enyl | 4.68359e-24 (3.65e-09) | 4.68359e-24 (3.65e-09) |
| H-abstraction to cyclenyl | 1.66242e-31 (1.30e-16) | 1.66242e-31 (1.30e-16) |

| species | PYtrue | Cumul | PYeffective | Cumul |
|---------|--------|-------|-------------|-------|
| -----   | -----  | ----- | -----       | ----- |

|                               |             |          |             |          |
|-------------------------------|-------------|----------|-------------|----------|
| rad19anti                     | 0.985437    | 0.985437 | 0.985437    | 0.985437 |
| rad9                          | 0.0125815   | 0.998018 | 0.0125815   | 0.998018 |
| rad8                          | 0.00197925  | 0.999998 | 0.00197925  | 0.999998 |
| rad19syn                      | 2.54000e-06 | 1.00000  | 2.54000e-06 | 1.00000  |
| rad12                         | 1.04930e-07 | 1.00000  | 1.04930e-07 | 1.00000  |
| rad15                         | 7.20107e-08 | 1.00000  | 7.20107e-08 | 1.00000  |
| Benzene+cycloprop-2-enylidene | 3.65179e-09 | 1.00000  | 3.65179e-09 | 1.00000  |
| rad7                          | 6.26324e-11 | 1.00000  | 6.26324e-11 | 1.00000  |
| Indene+H                      | 7.50962e-12 | 1.00000  | 7.50962e-12 | 1.00000  |
| PhCHCCH2+H                    | 5.23665e-13 | 1.00000  | 5.23665e-13 | 1.00000  |
| rad11                         | 2.22963e-14 | 1.00000  | 2.22963e-14 | 1.00000  |
| rad2                          | 2.07640e-14 | 1.00000  | 2.07640e-14 | 1.00000  |
| rad6                          | 1.65790e-14 | 1.00000  | 1.65790e-14 | 1.00000  |
| rad1                          | 6.01064e-15 | 1.00000  | 6.01064e-15 | 1.00000  |
| rad5                          | 4.84662e-15 | 1.00000  | 4.84662e-15 | 1.00000  |
| PhcycC3H3_A+H                 | 3.90398e-15 | 1.00000  | 3.90398e-15 | 1.00000  |
| Phenyl+cycC3H4                | 1.67819e-15 | 1.00000  | 0.00000     | 1.00000  |
| rad21                         | 1.37306e-15 | 1.00000  | 1.37306e-15 | 1.00000  |
| rad20                         | 5.67942e-16 | 1.00000  | 5.67942e-16 | 1.00000  |
| rad26                         | 1.48886e-16 | 1.00000  | 1.48886e-16 | 1.00000  |
| Benzene+cycloprop-1-enylidene | 1.29619e-16 | 1.00000  | 1.29619e-16 | 1.00000  |
| rad18                         | 5.35206e-17 | 1.00000  | 5.35206e-17 | 1.00000  |
| rad22                         | 3.50212e-18 | 1.00000  | 3.50212e-18 | 1.00000  |
| rad24                         | 8.06918e-19 | 1.00000  | 8.06918e-19 | 1.00000  |
| rad67                         | 5.46982e-19 | 1.00000  | 5.46982e-19 | 1.00000  |
| PhcycC3H3_B+H                 | 3.03313e-19 | 1.00000  | 3.03313e-19 | 1.00000  |
| C2H2+PhCH2                    | 3.03259e-19 | 1.00000  | 3.03259e-19 | 1.00000  |
| rad35                         | 2.52202e-19 | 1.00000  | 2.52202e-19 | 1.00000  |
| rad45                         | 1.10766e-19 | 1.00000  | 1.10766e-19 | 1.00000  |
| rad10                         | 6.78497e-20 | 1.00000  | 6.78497e-20 | 1.00000  |
| PhCCH+CH3                     | 5.77088e-20 | 1.00000  | 5.77088e-20 | 1.00000  |
| rad36                         | 2.34545e-20 | 1.00000  | 2.34545e-20 | 1.00000  |
| rad3                          | 1.48513e-20 | 1.00000  | 1.48513e-20 | 1.00000  |
| rad4                          | 1.19792e-20 | 1.00000  | 1.19792e-20 | 1.00000  |
| rad13                         | 9.23060e-21 | 1.00000  | 9.23060e-21 | 1.00000  |
| PhCCCH3+H                     | 6.53855e-21 | 1.00000  | 6.53855e-21 | 1.00000  |
| Ph+MeAc                       | 4.88684e-21 | 1.00000  | 4.88684e-21 | 1.00000  |
| rad31                         | 1.89409e-21 | 1.00000  | 1.89409e-21 | 1.00000  |
| rad25                         | 1.47866e-21 | 1.00000  | 1.47866e-21 | 1.00000  |
| Ph+Allene                     | 9.19852e-22 | 1.00000  | 9.19852e-22 | 1.00000  |
| rad27                         | 8.47598e-22 | 1.00000  | 8.47598e-22 | 1.00000  |
| rad33                         | 1.97115e-22 | 1.00000  | 1.97115e-22 | 1.00000  |
| PhCH2CCH+H                    | 1.40186e-22 | 1.00000  | 1.40186e-22 | 1.00000  |
| rad23                         | 3.00106e-23 | 1.00000  | 3.00106e-23 | 1.00000  |
| rad30                         | 3.44018e-24 | 1.00000  | 3.44018e-24 | 1.00000  |
| rad37                         | 6.11786e-26 | 1.00000  | 6.11786e-26 | 1.00000  |
| rad28                         | 4.04103e-26 | 1.00000  | 4.04103e-26 | 1.00000  |
| rad60syn                      | 9.18633e-27 | 1.00000  | 9.18633e-27 | 1.00000  |
| rad60anti                     | 4.33369e-27 | 1.00000  | 4.33369e-27 | 1.00000  |
| rad14                         | 3.05721e-27 | 1.00000  | 3.05721e-27 | 1.00000  |
| PAH3+H                        | 2.51164e-27 | 1.00000  | 2.51164e-27 | 1.00000  |
| PAH7+H                        | 1.08992e-27 | 1.00000  | 1.08992e-27 | 1.00000  |
| rad59                         | 5.42126e-28 | 1.00000  | 5.42126e-28 | 1.00000  |
| rad38                         | 1.19344e-28 | 1.00000  | 1.19344e-28 | 1.00000  |
| PAH10+CH3                     | 4.03099e-29 | 1.00000  | 4.03099e-29 | 1.00000  |
| rad43                         | 1.87874e-31 | 1.00000  | 1.87874e-31 | 1.00000  |
| rad46                         | 1.64386e-31 | 1.00000  | 1.64386e-31 | 1.00000  |
| rad58                         | 1.77256e-32 | 1.00000  | 1.77256e-32 | 1.00000  |
| rad70                         | 8.48450e-33 | 1.00000  | 8.48450e-33 | 1.00000  |
| rad54                         | 6.26021e-33 | 1.00000  | 6.26021e-33 | 1.00000  |
| PAH1+H                        | 1.77807e-33 | 1.00000  | 1.77807e-33 | 1.00000  |
| PAH9+H                        | 1.20782e-33 | 1.00000  | 1.20782e-33 | 1.00000  |
| rad50                         | 5.50776e-34 | 1.00000  | 5.50776e-34 | 1.00000  |
| rad34                         | 8.38074e-35 | 1.00000  | 8.38074e-35 | 1.00000  |
| rad39                         | 7.01493e-35 | 1.00000  | 7.01493e-35 | 1.00000  |
| rad55                         | 3.74946e-35 | 1.00000  | 3.74946e-35 | 1.00000  |
| rad41                         | 2.97957e-36 | 1.00000  | 2.97957e-36 | 1.00000  |
| rad52                         | 6.90757e-37 | 1.00000  | 6.90757e-37 | 1.00000  |
| rad62                         | 2.23999e-37 | 1.00000  | 2.23999e-37 | 1.00000  |
| rad51                         | 1.30711e-37 | 1.00000  | 1.30711e-37 | 1.00000  |
| rad47                         | 1.56079e-38 | 1.00000  | 1.56079e-38 | 1.00000  |
| rad53                         | 4.84783e-41 | 1.00000  | 4.84783e-41 | 1.00000  |
| rad61                         | 1.72730e-41 | 1.00000  | 1.72730e-41 | 1.00000  |
| rad42                         | 1.53691e-41 | 1.00000  | 1.53691e-41 | 1.00000  |
| rad65                         | 1.85149e-42 | 1.00000  | 1.85149e-42 | 1.00000  |
| rad68syn                      | 9.47546e-45 | 1.00000  | 9.47546e-45 | 1.00000  |
| rad68anti                     | 7.58601e-45 | 1.00000  | 7.58601e-45 | 1.00000  |
| rad56                         | 5.36593e-46 | 1.00000  | 5.36593e-46 | 1.00000  |
| rad64                         | 5.34483e-48 | 1.00000  | 5.34483e-48 | 1.00000  |
| rad40syn                      | 4.88107e-49 | 1.00000  | 4.88107e-49 | 1.00000  |

|           |             |         |             |         |
|-----------|-------------|---------|-------------|---------|
| rad40anti | 3.47166e-49 | 1.00000 | 3.47166e-49 | 1.00000 |
| PAH8+H    | 8.08695e-51 | 1.00000 | 8.08695e-51 | 1.00000 |
| rad73     | 4.74793e-54 | 1.00000 | 4.74793e-54 | 1.00000 |
| rad71     | 7.70204e-58 | 1.00000 | 7.70204e-58 | 1.00000 |

100000000. Pa, 110.000000 K

=====

| Rate constant             | True (fraction)        | Effective (fraction)   |
|---------------------------|------------------------|------------------------|
| Total                     | 1.95524e-15 (1.00 )    | 1.95524e-15 (1.00 )    |
| Formation of rad19        | 1.95524e-15 (1.000 )   | 1.95524e-15 (1.000 )   |
| H-abstraction to cyc2enyl | 4.50936e-23 (2.31e-08) | 4.50936e-23 (2.31e-08) |
| H-abstraction to cyclenyl | 7.87782e-30 (4.03e-15) | 7.87782e-30 (4.03e-15) |

| species                       | PYtrue      | Cumul    | PYeffective | Cumul    |
|-------------------------------|-------------|----------|-------------|----------|
| rad19anti                     | 0.983871    | 0.983871 | 0.983871    | 0.983871 |
| rad9                          | 0.0141595   | 0.998030 | 0.0141595   | 0.998030 |
| rad8                          | 0.00196827  | 0.999999 | 0.00196827  | 0.999999 |
| rad19syn                      | 1.03264e-06 | 1.000000 | 1.03264e-06 | 1.000000 |
| rad12                         | 1.30513e-07 | 1.000000 | 1.30513e-07 | 1.000000 |
| rad15                         | 9.14157e-08 | 1.000000 | 9.14157e-08 | 1.000000 |
| Benzene+cycloprop-2-enylidene | 2.30629e-08 | 1.000000 | 2.30629e-08 | 1.000000 |
| rad7                          | 6.97920e-11 | 1.000000 | 6.97920e-11 | 1.000000 |
| Indene+H                      | 1.07353e-11 | 1.000000 | 1.07353e-11 | 1.000000 |
| PhCHCCH2+H                    | 6.91408e-13 | 1.000000 | 6.91408e-13 | 1.000000 |
| rad11                         | 2.99718e-14 | 1.000000 | 2.99718e-14 | 1.000000 |
| rad2                          | 2.71654e-14 | 1.000000 | 2.71654e-14 | 1.000000 |
| rad6                          | 2.07667e-14 | 1.000000 | 2.07667e-14 | 1.000000 |
| rad1                          | 7.67776e-15 | 1.000000 | 7.67776e-15 | 1.000000 |
| rad5                          | 5.87340e-15 | 1.000000 | 5.87340e-15 | 1.000000 |
| PhcycC3H3_A+H                 | 5.58978e-15 | 1.000000 | 5.58978e-15 | 1.000000 |
| Benzene+cycloprop-1-enylidene | 4.02908e-15 | 1.000000 | 4.02908e-15 | 1.000000 |
| Phenyl+cycC3H4                | 2.73192e-15 | 1.000000 | 0.000000    | 1.000000 |
| rad21                         | 1.85187e-15 | 1.000000 | 1.85187e-15 | 1.000000 |
| rad20                         | 6.93547e-16 | 1.000000 | 6.93547e-16 | 1.000000 |
| rad26                         | 2.21090e-16 | 1.000000 | 2.21090e-16 | 1.000000 |
| rad18                         | 7.92519e-17 | 1.000000 | 7.92519e-17 | 1.000000 |
| rad22                         | 5.26119e-18 | 1.000000 | 5.26119e-18 | 1.000000 |
| rad24                         | 1.19858e-18 | 1.000000 | 1.19858e-18 | 1.000000 |
| PhcycC3H3_B+H                 | 8.77092e-19 | 1.000000 | 8.77092e-19 | 1.000000 |
| rad67                         | 8.36604e-19 | 1.000000 | 8.36604e-19 | 1.000000 |
| C2H2+PhCH2                    | 4.20090e-19 | 1.000000 | 4.20090e-19 | 1.000000 |
| rad35                         | 3.84671e-19 | 1.000000 | 3.84671e-19 | 1.000000 |
| rad45                         | 1.84209e-19 | 1.000000 | 1.84209e-19 | 1.000000 |
| rad10                         | 9.94753e-20 | 1.000000 | 9.94753e-20 | 1.000000 |
| PhCCH+CH3                     | 8.03480e-20 | 1.000000 | 8.03480e-20 | 1.000000 |
| rad36                         | 3.82350e-20 | 1.000000 | 3.82350e-20 | 1.000000 |
| rad3                          | 2.20694e-20 | 1.000000 | 2.20694e-20 | 1.000000 |
| rad4                          | 1.77286e-20 | 1.000000 | 1.77286e-20 | 1.000000 |
| rad13                         | 1.31063e-20 | 1.000000 | 1.31063e-20 | 1.000000 |
| PhCCCH3+H                     | 9.89369e-21 | 1.000000 | 9.89369e-21 | 1.000000 |
| Ph+MeAc                       | 7.58692e-21 | 1.000000 | 7.58692e-21 | 1.000000 |
| rad25                         | 2.28954e-21 | 1.000000 | 2.28954e-21 | 1.000000 |
| rad31                         | 2.15150e-21 | 1.000000 | 2.15150e-21 | 1.000000 |
| Ph+Allene                     | 1.46484e-21 | 1.000000 | 1.46484e-21 | 1.000000 |
| rad27                         | 1.25310e-21 | 1.000000 | 1.25310e-21 | 1.000000 |
| rad33                         | 2.81387e-22 | 1.000000 | 2.81387e-22 | 1.000000 |
| PhCH2CCH+H                    | 2.26899e-22 | 1.000000 | 2.26899e-22 | 1.000000 |
| rad23                         | 5.13119e-23 | 1.000000 | 5.13119e-23 | 1.000000 |
| rad30                         | 5.89444e-24 | 1.000000 | 5.89444e-24 | 1.000000 |
| rad37                         | 1.08919e-25 | 1.000000 | 1.08919e-25 | 1.000000 |
| rad28                         | 6.98854e-26 | 1.000000 | 6.98854e-26 | 1.000000 |
| rad60syn                      | 1.61631e-26 | 1.000000 | 1.61631e-26 | 1.000000 |
| rad60anti                     | 7.64337e-27 | 1.000000 | 7.64337e-27 | 1.000000 |
| rad14                         | 5.28239e-27 | 1.000000 | 5.28239e-27 | 1.000000 |
| PAH3+H                        | 4.56698e-27 | 1.000000 | 4.56698e-27 | 1.000000 |
| PAH7+H                        | 1.97550e-27 | 1.000000 | 1.97550e-27 | 1.000000 |
| rad59                         | 9.81317e-28 | 1.000000 | 9.81317e-28 | 1.000000 |
| rad38                         | 2.22904e-28 | 1.000000 | 2.22904e-28 | 1.000000 |
| PAH10+CH3                     | 7.88309e-29 | 1.000000 | 7.88309e-29 | 1.000000 |
| rad43                         | 3.46197e-31 | 1.000000 | 3.46197e-31 | 1.000000 |
| rad46                         | 3.23559e-31 | 1.000000 | 3.23559e-31 | 1.000000 |
| rad58                         | 3.66109e-32 | 1.000000 | 3.66109e-32 | 1.000000 |
| rad70                         | 1.77835e-32 | 1.000000 | 1.77835e-32 | 1.000000 |
| rad54                         | 1.14690e-32 | 1.000000 | 1.14690e-32 | 1.000000 |
| PAH1+H                        | 3.99724e-33 | 1.000000 | 3.99724e-33 | 1.000000 |
| PAH9+H                        | 2.42358e-33 | 1.000000 | 2.42358e-33 | 1.000000 |
| rad50                         | 1.14351e-33 | 1.000000 | 1.14351e-33 | 1.000000 |
| rad34                         | 1.91872e-34 | 1.000000 | 1.91872e-34 | 1.000000 |

|           |             |         |             |         |
|-----------|-------------|---------|-------------|---------|
| rad39     | 1.47521e-34 | 1.00000 | 1.47521e-34 | 1.00000 |
| rad55     | 7.27240e-35 | 1.00000 | 7.27240e-35 | 1.00000 |
| rad41     | 6.95847e-36 | 1.00000 | 6.95847e-36 | 1.00000 |
| rad52     | 1.61916e-36 | 1.00000 | 1.61916e-36 | 1.00000 |
| rad62     | 5.17459e-37 | 1.00000 | 5.17459e-37 | 1.00000 |
| rad51     | 3.23350e-37 | 1.00000 | 3.23350e-37 | 1.00000 |
| rad47     | 4.15401e-38 | 1.00000 | 4.15401e-38 | 1.00000 |
| rad53     | 1.83485e-40 | 1.00000 | 1.83485e-40 | 1.00000 |
| rad61     | 1.20538e-40 | 1.00000 | 1.20538e-40 | 1.00000 |
| rad42     | 4.48516e-41 | 1.00000 | 4.48516e-41 | 1.00000 |
| rad65     | 4.46884e-42 | 1.00000 | 4.46884e-42 | 1.00000 |
| rad68syn  | 8.94466e-44 | 1.00000 | 8.94466e-44 | 1.00000 |
| rad68anti | 7.13268e-44 | 1.00000 | 7.13268e-44 | 1.00000 |
| rad56     | 5.00451e-45 | 1.00000 | 5.00451e-45 | 1.00000 |
| rad64     | 2.87300e-47 | 1.00000 | 2.87300e-47 | 1.00000 |
| rad40syn  | 8.34085e-48 | 1.00000 | 8.34085e-48 | 1.00000 |
| rad40anti | 5.88686e-48 | 1.00000 | 5.88686e-48 | 1.00000 |
| PAH8+H    | 1.92204e-49 | 1.00000 | 1.92204e-49 | 1.00000 |
| rad73     | 8.40587e-53 | 1.00000 | 8.40587e-53 | 1.00000 |
| rad71     | 2.39374e-56 | 1.00000 | 2.39374e-56 | 1.00000 |

100000000. Pa, 120.000000 K

| Rate constant             | True (fraction)        | Effective (fraction)   |
|---------------------------|------------------------|------------------------|
| Total                     | 2.79817e-15 (1.00 )    | 2.79817e-15 (1.00 )    |
| Formation of rad19        | 2.79817e-15 (1.000 )   | 2.79817e-15 (1.000 )   |
| H-abstraction to cyc2enyl | 2.96039e-22 (1.06e-07) | 2.96039e-22 (1.06e-07) |
| H-abstraction to cyclenyl | 1.95323e-28 (6.98e-14) | 1.95323e-28 (6.98e-14) |

| species                       | PYtrue      | Cumul    | PYeffective | Cumul    |
|-------------------------------|-------------|----------|-------------|----------|
| rad19anti                     | 0.982286    | 0.982286 | 0.982286    | 0.982286 |
| rad9                          | 0.0157595   | 0.998045 | 0.0157595   | 0.998045 |
| rad8                          | 0.00195422  | 1.000000 | 0.00195422  | 1.000000 |
| rad19syn                      | 4.49890e-07 | 1.000000 | 4.49890e-07 | 1.000000 |
| rad12                         | 1.59033e-07 | 1.000000 | 1.59033e-07 | 1.000000 |
| rad15                         | 1.13688e-07 | 1.000000 | 1.13688e-07 | 1.000000 |
| Benzene+cycloprop-2-enylidene | 1.05797e-07 | 1.000000 | 1.05797e-07 | 1.000000 |
| rad7                          | 7.75693e-11 | 1.000000 | 7.75693e-11 | 1.000000 |
| Indene+H                      | 1.49059e-11 | 1.000000 | 1.49059e-11 | 1.000000 |
| PhCHCCH2+H                    | 8.97489e-13 | 1.000000 | 8.97489e-13 | 1.000000 |
| Benzene+cycloprop-1-enylidene | 6.98038e-14 | 1.000000 | 6.98038e-14 | 1.000000 |
| rad11                         | 3.95316e-14 | 1.000000 | 3.95316e-14 | 1.000000 |
| rad2                          | 3.50139e-14 | 1.000000 | 3.50139e-14 | 1.000000 |
| rad6                          | 2.57447e-14 | 1.000000 | 2.57447e-14 | 1.000000 |
| rad1                          | 9.68894e-15 | 1.000000 | 9.68894e-15 | 1.000000 |
| PhcycC3H3_A+H                 | 8.02209e-15 | 1.000000 | 8.02209e-15 | 1.000000 |
| rad5                          | 7.03876e-15 | 1.000000 | 7.03876e-15 | 1.000000 |
| Phenyl+cycC3H4                | 4.36579e-15 | 1.000000 | 0.000000    | 1.000000 |
| rad21                         | 2.45790e-15 | 1.000000 | 2.45790e-15 | 1.000000 |
| rad20                         | 8.38112e-16 | 1.000000 | 8.38112e-16 | 1.000000 |
| rad26                         | 3.19437e-16 | 1.000000 | 3.19437e-16 | 1.000000 |
| rad18                         | 1.14179e-16 | 1.000000 | 1.14179e-16 | 1.000000 |
| rad22                         | 7.71785e-18 | 1.000000 | 7.71785e-18 | 1.000000 |
| PhcycC3H3_B+H                 | 2.36657e-18 | 1.000000 | 2.36657e-18 | 1.000000 |
| rad24                         | 1.73880e-18 | 1.000000 | 1.73880e-18 | 1.000000 |
| rad67                         | 1.24690e-18 | 1.000000 | 1.24690e-18 | 1.000000 |
| rad35                         | 5.71646e-19 | 1.000000 | 5.71646e-19 | 1.000000 |
| C2H2+PhCH2                    | 5.71599e-19 | 1.000000 | 5.71599e-19 | 1.000000 |
| rad45                         | 2.96740e-19 | 1.000000 | 2.96740e-19 | 1.000000 |
| rad10                         | 1.43252e-19 | 1.000000 | 1.43252e-19 | 1.000000 |
| PhCCH+CH3                     | 1.09910e-19 | 1.000000 | 1.09910e-19 | 1.000000 |
| rad36                         | 6.04769e-20 | 1.000000 | 6.04769e-20 | 1.000000 |
| rad3                          | 3.21724e-20 | 1.000000 | 3.21724e-20 | 1.000000 |
| rad4                          | 2.57316e-20 | 1.000000 | 2.57316e-20 | 1.000000 |
| rad13                         | 1.82959e-20 | 1.000000 | 1.82959e-20 | 1.000000 |
| PhCCCH3+H                     | 1.46868e-20 | 1.000000 | 1.46868e-20 | 1.000000 |
| Ph+MeAc                       | 1.15316e-20 | 1.000000 | 1.15316e-20 | 1.000000 |
| rad25                         | 3.45811e-21 | 1.000000 | 3.45811e-21 | 1.000000 |
| rad31                         | 2.43411e-21 | 1.000000 | 2.43411e-21 | 1.000000 |
| Ph+Allene                     | 2.28033e-21 | 1.000000 | 2.28033e-21 | 1.000000 |
| rad27                         | 1.82269e-21 | 1.000000 | 1.82269e-21 | 1.000000 |
| rad33                         | 3.95106e-22 | 1.000000 | 3.95106e-22 | 1.000000 |
| PhCH2CCH+H                    | 3.59552e-22 | 1.000000 | 3.59552e-22 | 1.000000 |
| rad23                         | 8.51241e-23 | 1.000000 | 8.51241e-23 | 1.000000 |
| rad30                         | 9.77406e-24 | 1.000000 | 9.77406e-24 | 1.000000 |
| rad37                         | 1.88228e-25 | 1.000000 | 1.88228e-25 | 1.000000 |
| rad28                         | 1.17901e-25 | 1.000000 | 1.17901e-25 | 1.000000 |
| rad60syn                      | 2.75814e-26 | 1.000000 | 2.75814e-26 | 1.000000 |

|           |             |         |             |         |
|-----------|-------------|---------|-------------|---------|
| rad60anti | 1.30769e-26 | 1.00000 | 1.30769e-26 | 1.00000 |
| rad14     | 8.91078e-27 | 1.00000 | 8.91078e-27 | 1.00000 |
| PAH3+H    | 8.07712e-27 | 1.00000 | 8.07712e-27 | 1.00000 |
| PAH7+H    | 3.49404e-27 | 1.00000 | 3.49404e-27 | 1.00000 |
| rad59     | 1.72694e-27 | 1.00000 | 1.72694e-27 | 1.00000 |
| rad38     | 4.05730e-28 | 1.00000 | 4.05730e-28 | 1.00000 |
| PAH10+CH3 | 1.50873e-28 | 1.00000 | 1.50873e-28 | 1.00000 |
| rad43     | 6.32288e-31 | 1.00000 | 6.32288e-31 | 1.00000 |
| rad46     | 6.17093e-31 | 1.00000 | 6.17093e-31 | 1.00000 |
| rad58     | 7.42995e-32 | 1.00000 | 7.42995e-32 | 1.00000 |
| rad70     | 3.67086e-32 | 1.00000 | 3.67086e-32 | 1.00000 |
| rad54     | 2.07937e-32 | 1.00000 | 2.07937e-32 | 1.00000 |
| PAH1+H    | 8.87010e-33 | 1.00000 | 8.87010e-33 | 1.00000 |
| PAH9+H    | 4.71539e-33 | 1.00000 | 4.71539e-33 | 1.00000 |
| rad50     | 2.31334e-33 | 1.00000 | 2.31334e-33 | 1.00000 |
| rad34     | 4.34856e-34 | 1.00000 | 4.34856e-34 | 1.00000 |
| rad39     | 3.02927e-34 | 1.00000 | 3.02927e-34 | 1.00000 |
| rad55     | 1.40273e-34 | 1.00000 | 1.40273e-34 | 1.00000 |
| rad41     | 1.63218e-35 | 1.00000 | 1.63218e-35 | 1.00000 |
| rad52     | 3.68760e-36 | 1.00000 | 3.68760e-36 | 1.00000 |
| rad62     | 1.17955e-36 | 1.00000 | 1.17955e-36 | 1.00000 |
| rad51     | 7.81046e-37 | 1.00000 | 7.81046e-37 | 1.00000 |
| rad47     | 1.09990e-37 | 1.00000 | 1.09990e-37 | 1.00000 |
| rad61     | 8.09112e-40 | 1.00000 | 8.09112e-40 | 1.00000 |
| rad53     | 6.73586e-40 | 1.00000 | 6.73586e-40 | 1.00000 |
| rad42     | 1.30790e-40 | 1.00000 | 1.30790e-40 | 1.00000 |
| rad65     | 1.06791e-41 | 1.00000 | 1.06791e-41 | 1.00000 |
| rad68syn  | 8.13985e-43 | 1.00000 | 8.13985e-43 | 1.00000 |
| rad68anti | 6.46005e-43 | 1.00000 | 6.46005e-43 | 1.00000 |
| rad56     | 4.59549e-44 | 1.00000 | 4.59549e-44 | 1.00000 |
| rad64     | 1.51763e-46 | 1.00000 | 1.51763e-46 | 1.00000 |
| rad40syn  | 1.40512e-46 | 1.00000 | 1.40512e-46 | 1.00000 |
| rad40anti | 9.84331e-47 | 1.00000 | 9.84331e-47 | 1.00000 |
| PAH8+H    | 4.53157e-48 | 1.00000 | 4.53157e-48 | 1.00000 |
| rad73     | 1.46022e-51 | 1.00000 | 1.46022e-51 | 1.00000 |
| rad71     | 7.35595e-55 | 1.00000 | 7.35595e-55 | 1.00000 |

10000000. Pa, 130.000000 K

| Rate constant             | True (fraction)        | Effective (fraction)   |
|---------------------------|------------------------|------------------------|
| Total                     | 3.81236e-15 (1.00 )    | 3.81236e-15 (1.00 )    |
| Formation of rad19        | 3.81236e-15 (1.000 )   | 3.81236e-15 (1.000 )   |
| H-abstraction to cyc2enyl | 1.44825e-21 (3.80e-07) | 1.44825e-21 (3.80e-07) |
| H-abstraction to cyclenyl | 2.94348e-27 (7.72e-13) | 2.94348e-27 (7.72e-13) |

| species                       | PYtrue      | Cumul    | PYeffective | Cumul    |
|-------------------------------|-------------|----------|-------------|----------|
| rad19anti                     | 0.980673    | 0.980673 | 0.980673    | 0.980673 |
| rad9                          | 0.0173879   | 0.998061 | 0.0173879   | 0.998061 |
| rad8                          | 0.00193814  | 0.999999 | 0.00193814  | 0.999999 |
| Benzene+cycloprop-2-enylidene | 3.79882e-07 | 0.999999 | 3.79882e-07 | 0.999999 |
| rad19syn                      | 2.09128e-07 | 0.999999 | 2.09128e-07 | 0.999999 |
| rad12                         | 1.90680e-07 | 0.999999 | 1.90680e-07 | 0.999999 |
| rad15                         | 1.39127e-07 | 1.000000 | 1.39127e-07 | 1.000000 |
| rad7                          | 8.61194e-11 | 1.000000 | 8.61194e-11 | 1.000000 |
| Indene+H                      | 2.02328e-11 | 1.000000 | 2.02328e-11 | 1.000000 |
| PhCHCCH2+H                    | 1.15050e-12 | 1.000000 | 1.15050e-12 | 1.000000 |
| Benzene+cycloprop-1-enylidene | 7.72089e-13 | 1.000000 | 7.72089e-13 | 1.000000 |
| rad11                         | 5.14184e-14 | 1.000000 | 5.14184e-14 | 1.000000 |
| rad2                          | 4.46462e-14 | 1.000000 | 4.46462e-14 | 1.000000 |
| rad6                          | 3.16956e-14 | 1.000000 | 3.16956e-14 | 1.000000 |
| rad1                          | 1.21227e-14 | 1.000000 | 1.21227e-14 | 1.000000 |
| PhcycC3H3_A+H                 | 1.15666e-14 | 1.000000 | 1.15666e-14 | 1.000000 |
| rad5                          | 8.36836e-15 | 1.000000 | 8.36836e-15 | 1.000000 |
| Phenyl+cycC3H4                | 6.88161e-15 | 1.000000 | 0.000000    | 1.000000 |
| rad21                         | 3.22544e-15 | 1.000000 | 3.22544e-15 | 1.000000 |
| rad20                         | 1.00559e-15 | 1.000000 | 1.00559e-15 | 1.000000 |
| rad26                         | 4.52141e-16 | 1.000000 | 4.52141e-16 | 1.000000 |
| rad18                         | 1.61138e-16 | 1.000000 | 1.61138e-16 | 1.000000 |
| rad22                         | 1.11280e-17 | 1.000000 | 1.11280e-17 | 1.000000 |
| PhcycC3H3_B+H                 | 6.00033e-18 | 1.000000 | 6.00033e-18 | 1.000000 |
| rad24                         | 2.47972e-18 | 1.000000 | 2.47972e-18 | 1.000000 |
| rad67                         | 1.82394e-18 | 1.000000 | 1.82394e-18 | 1.000000 |
| rad35                         | 8.33585e-19 | 1.000000 | 8.33585e-19 | 1.000000 |
| C2H2+PhCH2                    | 7.68011e-19 | 1.000000 | 7.68011e-19 | 1.000000 |
| rad45                         | 4.66932e-19 | 1.000000 | 4.66932e-19 | 1.000000 |
| rad10                         | 2.03723e-19 | 1.000000 | 2.03723e-19 | 1.000000 |
| PhCCH+CH3                     | 1.48510e-19 | 1.000000 | 1.48510e-19 | 1.000000 |
| rad36                         | 9.35815e-20 | 1.000000 | 9.35815e-20 | 1.000000 |



|            |             |          |             |          |
|------------|-------------|----------|-------------|----------|
| rad3       | 4.62790e-20 | 1.000000 | 4.62790e-20 | 1.000000 |
| rad4       | 3.68522e-20 | 1.000000 | 3.68522e-20 | 1.000000 |
| rad13      | 2.52480e-20 | 1.000000 | 2.52480e-20 | 1.000000 |
| PhCCCH3+H  | 2.15291e-20 | 1.000000 | 2.15291e-20 | 1.000000 |
| Ph+MeAc    | 1.72872e-20 | 1.000000 | 1.72872e-20 | 1.000000 |
| rad25      | 5.13231e-21 | 1.000000 | 5.13231e-21 | 1.000000 |
| Ph+Allene  | 3.49671e-21 | 1.000000 | 3.49671e-21 | 1.000000 |
| rad31      | 2.75157e-21 | 1.000000 | 2.75157e-21 | 1.000000 |
| rad27      | 2.62259e-21 | 1.000000 | 2.62259e-21 | 1.000000 |
| PhCH2CCH+H | 5.62187e-22 | 1.000000 | 5.62187e-22 | 1.000000 |
| rad33      | 5.48718e-22 | 1.000000 | 5.48718e-22 | 1.000000 |
| rad23      | 1.38208e-22 | 1.000000 | 1.38208e-22 | 1.000000 |
| rad30      | 1.58289e-23 | 1.000000 | 1.58289e-23 | 1.000000 |
| rad37      | 3.18791e-25 | 1.000000 | 3.18791e-25 | 1.000000 |
| rad28      | 1.95716e-25 | 1.000000 | 1.95716e-25 | 1.000000 |
| rad60syn   | 4.60822e-26 | 1.000000 | 4.60822e-26 | 1.000000 |
| rad60anti  | 2.19104e-26 | 1.000000 | 2.19104e-26 | 1.000000 |
| rad14      | 1.48047e-26 | 1.000000 | 1.48047e-26 | 1.000000 |
| PAH3+H     | 1.40328e-26 | 1.000000 | 1.40328e-26 | 1.000000 |
| PAH7+H     | 6.08841e-27 | 1.000000 | 6.08841e-27 | 1.000000 |
| rad59      | 2.98387e-27 | 1.000000 | 2.98387e-27 | 1.000000 |
| rad38      | 7.27038e-28 | 1.000000 | 7.27038e-28 | 1.000000 |
| PAH10+CH3  | 2.85594e-28 | 1.000000 | 2.85594e-28 | 1.000000 |
| rad43      | 1.15520e-30 | 1.000000 | 1.15520e-30 | 1.000000 |
| rad46      | 1.15325e-30 | 1.000000 | 1.15325e-30 | 1.000000 |
| rad58      | 1.49768e-31 | 1.000000 | 1.49768e-31 | 1.000000 |
| rad70      | 7.54633e-32 | 1.000000 | 7.54633e-32 | 1.000000 |
| rad54      | 3.76498e-32 | 1.000000 | 3.76498e-32 | 1.000000 |
| PAH1+H     | 1.96367e-32 | 1.000000 | 1.96367e-32 | 1.000000 |
| PAH9+H     | 8.99970e-33 | 1.000000 | 8.99970e-33 | 1.000000 |
| rad50      | 4.61509e-33 | 1.000000 | 4.61509e-33 | 1.000000 |
| rad34      | 9.86453e-34 | 1.000000 | 9.86453e-34 | 1.000000 |
| rad39      | 6.14898e-34 | 1.000000 | 6.14898e-34 | 1.000000 |
| rad55      | 2.71566e-34 | 1.000000 | 2.71566e-34 | 1.000000 |
| rad41      | 3.87967e-35 | 1.000000 | 3.87967e-35 | 1.000000 |
| rad52      | 8.27588e-36 | 1.000000 | 8.27588e-36 | 1.000000 |
| rad62      | 2.68984e-36 | 1.000000 | 2.68984e-36 | 1.000000 |
| rad51      | 1.86897e-36 | 1.000000 | 1.86897e-36 | 1.000000 |
| rad47      | 2.93391e-37 | 1.000000 | 2.93391e-37 | 1.000000 |
| rad61      | 5.14602e-39 | 1.000000 | 5.14602e-39 | 1.000000 |
| rad53      | 2.40691e-39 | 1.000000 | 2.40691e-39 | 1.000000 |
| rad42      | 3.85970e-40 | 1.000000 | 3.85970e-40 | 1.000000 |
| rad65      | 2.56192e-41 | 1.000000 | 2.56192e-41 | 1.000000 |
| rad68syn   | 6.95493e-42 | 1.000000 | 6.95493e-42 | 1.000000 |
| rad68anti  | 5.48807e-42 | 1.000000 | 5.48807e-42 | 1.000000 |
| rad56      | 3.90573e-43 | 1.000000 | 3.90573e-43 | 1.000000 |
| rad40syn   | 2.22834e-45 | 1.000000 | 2.22834e-45 | 1.000000 |
| rad40anti  | 1.54914e-45 | 1.000000 | 1.54914e-45 | 1.000000 |
| rad64      | 7.90116e-46 | 1.000000 | 7.90116e-46 | 1.000000 |
| PAH8+H     | 1.00878e-46 | 1.000000 | 1.00878e-46 | 1.000000 |
| rad73      | 2.41487e-50 | 1.000000 | 2.41487e-50 | 1.000000 |
| rad71      | 2.13819e-53 | 1.000000 | 2.13819e-53 | 1.000000 |

100000000. Pa, 140.000000 K

| Rate constant             | True (fraction)        | Effective (fraction)   |
|---------------------------|------------------------|------------------------|
| Total                     | 4.99515e-15 (1.00)     | 4.99515e-15 (1.00)     |
| Formation of rad19        | 4.99514e-15 (1.000)    | 4.99514e-15 (1.000)    |
| H-abstraction to cyc2enyl | 5.62488e-21 (1.13e-06) | 5.62488e-21 (1.13e-06) |
| H-abstraction to cyc1enyl | 3.00047e-26 (6.01e-12) | 3.00047e-26 (6.01e-12) |

| species                       | PYtrue      | Cumul    | PYeffective | Cumul    |
|-------------------------------|-------------|----------|-------------|----------|
| rad19anti                     | 0.979026    | 0.979026 | 0.979026    | 0.979026 |
| rad9                          | 0.0190516   | 0.998077 | 0.0190516   | 0.998077 |
| rad8                          | 0.00192073  | 0.999998 | 0.00192073  | 0.999998 |
| Benzene+cycloprop-2-enylidene | 1.12607e-06 | 0.999999 | 1.12607e-06 | 0.999999 |
| rad12                         | 2.25711e-07 | 1.000000 | 2.25711e-07 | 1.000000 |
| rad15                         | 1.68110e-07 | 1.000000 | 1.68110e-07 | 1.000000 |
| rad19syn                      | 1.03374e-07 | 1.000000 | 1.03374e-07 | 1.000000 |
| rad7                          | 9.56216e-11 | 1.000000 | 9.56216e-11 | 1.000000 |
| Indene+H                      | 2.69817e-11 | 1.000000 | 2.69817e-11 | 1.000000 |
| Benzene+cycloprop-1-enylidene | 6.00677e-12 | 1.000000 | 6.00677e-12 | 1.000000 |
| PhCHCCH2+H                    | 1.46172e-12 | 1.000000 | 1.46172e-12 | 1.000000 |
| rad11                         | 6.62159e-14 | 1.000000 | 6.62159e-14 | 1.000000 |
| rad2                          | 5.65052e-14 | 1.000000 | 5.65052e-14 | 1.000000 |
| rad6                          | 3.88572e-14 | 1.000000 | 3.88572e-14 | 1.000000 |
| PhcycC3H3_A+H                 | 1.67871e-14 | 1.000000 | 1.67871e-14 | 1.000000 |
| rad1                          | 1.50822e-14 | 1.000000 | 1.50822e-14 | 1.000000 |

|                |             |          |             |          |
|----------------|-------------|----------|-------------|----------|
| Phenyl+cycC3H4 | 1.07387e-14 | 1.000000 | 0.00000     | 1.000000 |
| rad5           | 9.89469e-15 | 1.000000 | 9.89469e-15 | 1.000000 |
| rad21          | 4.20072e-15 | 1.000000 | 4.20072e-15 | 1.000000 |
| rad20          | 1.20110e-15 | 1.000000 | 1.20110e-15 | 1.000000 |
| rad26          | 6.30320e-16 | 1.000000 | 6.30320e-16 | 1.000000 |
| rad18          | 2.23951e-16 | 1.000000 | 2.23951e-16 | 1.000000 |
| rad22          | 1.58537e-17 | 1.000000 | 1.58537e-17 | 1.000000 |
| PhcycC3H3_B+H  | 1.44318e-17 | 1.000000 | 1.44318e-17 | 1.000000 |
| rad24          | 3.49446e-18 | 1.000000 | 3.49446e-18 | 1.000000 |
| rad67          | 2.63345e-18 | 1.000000 | 2.63345e-18 | 1.000000 |
| rad35          | 1.19954e-18 | 1.000000 | 1.19954e-18 | 1.000000 |
| C2H2+PhCH2     | 1.02331e-18 | 1.000000 | 1.02331e-18 | 1.000000 |
| rad45          | 7.22549e-19 | 1.000000 | 7.22549e-19 | 1.000000 |
| rad10          | 2.87385e-19 | 1.000000 | 2.87385e-19 | 1.000000 |
| PhCCH+CH3      | 1.99058e-19 | 1.000000 | 1.99058e-19 | 1.000000 |
| rad36          | 1.42596e-19 | 1.000000 | 1.42596e-19 | 1.000000 |
| rad3           | 6.60042e-20 | 1.000000 | 6.60042e-20 | 1.000000 |
| rad4           | 5.23361e-20 | 1.000000 | 5.23361e-20 | 1.000000 |
| rad13          | 3.45933e-20 | 1.000000 | 3.45933e-20 | 1.000000 |
| PhCCCH3+H      | 3.13319e-20 | 1.000000 | 3.13319e-20 | 1.000000 |
| Ph+MeAc        | 2.57153e-20 | 1.000000 | 2.57153e-20 | 1.000000 |
| rad25          | 7.52875e-21 | 1.000000 | 7.52875e-21 | 1.000000 |
| Ph+Allene      | 5.31471e-21 | 1.000000 | 5.31471e-21 | 1.000000 |
| rad27          | 3.74982e-21 | 1.000000 | 3.74982e-21 | 1.000000 |
| rad31          | 3.11593e-21 | 1.000000 | 3.11593e-21 | 1.000000 |
| PhCH2CCH+H     | 8.72926e-22 | 1.000000 | 8.72926e-22 | 1.000000 |
| rad33          | 7.57063e-22 | 1.000000 | 7.57063e-22 | 1.000000 |
| rad23          | 2.21156e-22 | 1.000000 | 2.21156e-22 | 1.000000 |
| rad30          | 2.52206e-23 | 1.000000 | 2.52206e-23 | 1.000000 |
| rad37          | 5.33280e-25 | 1.000000 | 5.33280e-25 | 1.000000 |
| rad28          | 3.21955e-25 | 1.000000 | 3.21955e-25 | 1.000000 |
| rad60syn       | 7.59665e-26 | 1.000000 | 7.59665e-26 | 1.000000 |
| rad60anti      | 3.62314e-26 | 1.000000 | 3.62314e-26 | 1.000000 |
| rad14          | 2.44022e-26 | 1.000000 | 2.44022e-26 | 1.000000 |
| PAH3+H         | 2.41455e-26 | 1.000000 | 2.41455e-26 | 1.000000 |
| PAH7+H         | 1.05356e-26 | 1.000000 | 1.05356e-26 | 1.000000 |
| rad59          | 5.10296e-27 | 1.000000 | 5.10296e-27 | 1.000000 |
| rad38          | 1.29329e-27 | 1.000000 | 1.29329e-27 | 1.000000 |
| PAH10+CH3      | 5.39392e-28 | 1.000000 | 5.39392e-28 | 1.000000 |
| rad46          | 2.13157e-30 | 1.000000 | 2.13157e-30 | 1.000000 |
| rad43          | 2.12808e-30 | 1.000000 | 2.12808e-30 | 1.000000 |
| rad58          | 3.02514e-31 | 1.000000 | 3.02514e-31 | 1.000000 |
| rad70          | 1.55925e-31 | 1.000000 | 1.55925e-31 | 1.000000 |
| rad54          | 6.85804e-32 | 1.000000 | 6.85804e-32 | 1.000000 |
| PAH1+H         | 4.37345e-32 | 1.000000 | 4.37345e-32 | 1.000000 |
| PAH9+H         | 1.70144e-32 | 1.000000 | 1.70144e-32 | 1.000000 |
| rad50          | 9.17135e-33 | 1.000000 | 9.17135e-33 | 1.000000 |
| rad34          | 2.25940e-33 | 1.000000 | 2.25940e-33 | 1.000000 |
| rad39          | 1.24668e-33 | 1.000000 | 1.24668e-33 | 1.000000 |
| rad55          | 5.31474e-34 | 1.000000 | 5.31474e-34 | 1.000000 |
| rad41          | 9.40869e-35 | 1.000000 | 9.40869e-35 | 1.000000 |
| rad52          | 1.85173e-35 | 1.000000 | 1.85173e-35 | 1.000000 |
| rad62          | 6.20711e-36 | 1.000000 | 6.20711e-36 | 1.000000 |
| rad51          | 4.48341e-36 | 1.000000 | 4.48341e-36 | 1.000000 |
| rad47          | 7.96044e-37 | 1.000000 | 7.96044e-37 | 1.000000 |
| rad61          | 3.07878e-38 | 1.000000 | 3.07878e-38 | 1.000000 |
| rad53          | 8.40436e-39 | 1.000000 | 8.40436e-39 | 1.000000 |
| rad42          | 1.16363e-39 | 1.000000 | 1.16363e-39 | 1.000000 |
| rad65          | 6.24192e-41 | 1.000000 | 6.24192e-41 | 1.000000 |
| rad68syn       | 5.49385e-41 | 1.000000 | 5.49385e-41 | 1.000000 |
| rad68anti      | 4.30562e-41 | 1.000000 | 4.30562e-41 | 1.000000 |
| rad56          | 2.98220e-42 | 1.000000 | 2.98220e-42 | 1.000000 |
| rad40syn       | 3.21007e-44 | 1.000000 | 3.21007e-44 | 1.000000 |
| rad40anti      | 2.21346e-44 | 1.000000 | 2.21346e-44 | 1.000000 |
| rad64          | 4.06880e-45 | 1.000000 | 4.06880e-45 | 1.000000 |
| PAH8+H         | 2.03324e-45 | 1.000000 | 2.03324e-45 | 1.000000 |
| rad73          | 3.71475e-49 | 1.000000 | 3.71475e-49 | 1.000000 |
| rad71          | 5.64762e-52 | 1.000000 | 5.64762e-52 | 1.000000 |

100000000. Pa, 150.000000 K

| Rate constant             | True (fraction)        | Effective (fraction)   |
|---------------------------|------------------------|------------------------|
| Total                     | 6.34137e-15 (1.00 )    | 6.34137e-15 (1.00 )    |
| Formation of rad19        | 6.34135e-15 (1.000 )   | 6.34135e-15 (1.000 )   |
| H-abstraction to cyc2enyl | 1.81685e-20 (2.87e-06) | 1.81685e-20 (2.87e-06) |
| H-abstraction to cyclenyl | 2.23765e-25 (3.53e-11) | 2.23765e-25 (3.53e-11) |

  

| species | PYtrue | Cumul | PYeffective | Cumul |
|---------|--------|-------|-------------|-------|
| -----   | -----  | ----- | -----       | ----- |

|                               |             |          |             |          |
|-------------------------------|-------------|----------|-------------|----------|
| rad19anti                     | 0.977336    | 0.977336 | 0.977336    | 0.977336 |
| rad9                          | 0.0207584   | 0.998095 | 0.0207584   | 0.998095 |
| rad8                          | 0.00190249  | 0.999997 | 0.00190249  | 0.999997 |
| Benzene+cycloprop-2-enylidene | 2.86508e-06 | 1.000000 | 2.86508e-06 | 1.000000 |
| rad12                         | 2.64460e-07 | 1.000000 | 2.64460e-07 | 1.000000 |
| rad15                         | 2.01105e-07 | 1.000000 | 2.01105e-07 | 1.000000 |
| rad19syn                      | 5.41996e-08 | 1.000000 | 5.41996e-08 | 1.000000 |
| rad7                          | 1.06287e-10 | 1.000000 | 1.06287e-10 | 1.000000 |
| Indene+H                      | 3.54905e-11 | 1.000000 | 3.54905e-11 | 1.000000 |
| Benzene+cycloprop-1-enylidene | 3.52865e-11 | 1.000000 | 3.52865e-11 | 1.000000 |
| PhCHCCH2+H                    | 1.84599e-12 | 1.000000 | 1.84599e-12 | 1.000000 |
| rad11                         | 8.47008e-14 | 1.000000 | 8.47008e-14 | 1.000000 |
| rad2                          | 7.11786e-14 | 1.000000 | 7.11786e-14 | 1.000000 |
| rad6                          | 4.75396e-14 | 1.000000 | 4.75396e-14 | 1.000000 |
| PhcycC3H3_A+H                 | 2.45613e-14 | 1.000000 | 2.45613e-14 | 1.000000 |
| rad1                          | 1.87044e-14 | 1.000000 | 1.87044e-14 | 1.000000 |
| Phenyl+cycC3H4                | 1.66354e-14 | 1.000000 | 0.000000    | 1.000000 |
| rad5                          | 1.16588e-14 | 1.000000 | 1.16588e-14 | 1.000000 |
| rad21                         | 5.44669e-15 | 1.000000 | 5.44669e-15 | 1.000000 |
| rad20                         | 1.43128e-15 | 1.000000 | 1.43128e-15 | 1.000000 |
| rad26                         | 8.69234e-16 | 1.000000 | 8.69234e-16 | 1.000000 |
| rad18                         | 3.07843e-16 | 1.000000 | 3.07843e-16 | 1.000000 |
| PhcycC3H3_B+H                 | 3.32395e-17 | 1.000000 | 3.32395e-17 | 1.000000 |
| rad22                         | 2.24144e-17 | 1.000000 | 2.24144e-17 | 1.000000 |
| rad24                         | 4.88705e-18 | 1.000000 | 4.88705e-18 | 1.000000 |
| rad67                         | 3.77059e-18 | 1.000000 | 3.77059e-18 | 1.000000 |
| rad35                         | 1.71137e-18 | 1.000000 | 1.71137e-18 | 1.000000 |
| C2H2+PhCH2                    | 1.35683e-18 | 1.000000 | 1.35683e-18 | 1.000000 |
| rad45                         | 1.10568e-18 | 1.000000 | 1.10568e-18 | 1.000000 |
| rad10                         | 4.03666e-19 | 1.000000 | 4.03666e-19 | 1.000000 |
| PhCCH+CH3                     | 2.65595e-19 | 1.000000 | 2.65595e-19 | 1.000000 |
| rad36                         | 2.15124e-19 | 1.000000 | 2.15124e-19 | 1.000000 |
| rad3                          | 9.37163e-20 | 1.000000 | 9.37163e-20 | 1.000000 |
| rad4                          | 7.40077e-20 | 1.000000 | 7.40077e-20 | 1.000000 |
| rad13                         | 4.72270e-20 | 1.000000 | 4.72270e-20 | 1.000000 |
| PhCCCH3+H                     | 4.54775e-20 | 1.000000 | 4.54775e-20 | 1.000000 |
| Ph+MeAc                       | 3.81512e-20 | 1.000000 | 3.81512e-20 | 1.000000 |
| rad25                         | 1.09698e-20 | 1.000000 | 1.09698e-20 | 1.000000 |
| Ph+Allene                     | 8.04911e-21 | 1.000000 | 8.04911e-21 | 1.000000 |
| rad27                         | 5.34873e-21 | 1.000000 | 5.34873e-21 | 1.000000 |
| rad31                         | 3.54264e-21 | 1.000000 | 3.54264e-21 | 1.000000 |
| PhCH2CCH+H                    | 1.35340e-21 | 1.000000 | 1.35340e-21 | 1.000000 |
| rad33                         | 1.04143e-21 | 1.000000 | 1.04143e-21 | 1.000000 |
| rad23                         | 3.50837e-22 | 1.000000 | 3.50837e-22 | 1.000000 |
| rad30                         | 3.97784e-23 | 1.000000 | 3.97784e-23 | 1.000000 |
| rad37                         | 8.86917e-25 | 1.000000 | 8.86917e-25 | 1.000000 |
| rad28                         | 5.28006e-25 | 1.000000 | 5.28006e-25 | 1.000000 |
| rad60syn                      | 1.24368e-25 | 1.000000 | 1.24368e-25 | 1.000000 |
| rad60anti                     | 5.95170e-26 | 1.000000 | 5.95170e-26 | 1.000000 |
| PAH3+H                        | 4.14331e-26 | 1.000000 | 4.14331e-26 | 1.000000 |
| rad14                         | 4.01511e-26 | 1.000000 | 4.01511e-26 | 1.000000 |
| PAH7+H                        | 1.82285e-26 | 1.000000 | 1.82285e-26 | 1.000000 |
| rad59                         | 8.69744e-27 | 1.000000 | 8.69744e-27 | 1.000000 |
| rad38                         | 2.29998e-27 | 1.000000 | 2.29998e-27 | 1.000000 |
| PAH10+CH3                     | 1.02394e-27 | 1.000000 | 1.02394e-27 | 1.000000 |
| rad43                         | 3.98005e-30 | 1.000000 | 3.98005e-30 | 1.000000 |
| rad46                         | 3.92755e-30 | 1.000000 | 3.92755e-30 | 1.000000 |
| rad58                         | 6.16800e-31 | 1.000000 | 6.16800e-31 | 1.000000 |
| rad70                         | 3.26287e-31 | 1.000000 | 3.26287e-31 | 1.000000 |
| rad54                         | 1.26395e-31 | 1.000000 | 1.26395e-31 | 1.000000 |
| PAH1+H                        | 9.86402e-32 | 1.000000 | 9.86402e-32 | 1.000000 |
| PAH9+H                        | 3.21328e-32 | 1.000000 | 3.21328e-32 | 1.000000 |
| rad50                         | 1.83131e-32 | 1.000000 | 1.83131e-32 | 1.000000 |
| rad34                         | 5.26085e-33 | 1.000000 | 5.26085e-33 | 1.000000 |
| rad39                         | 2.54735e-33 | 1.000000 | 2.54735e-33 | 1.000000 |
| rad55                         | 1.05690e-33 | 1.000000 | 1.05690e-33 | 1.000000 |
| rad41                         | 2.33949e-34 | 1.000000 | 2.33949e-34 | 1.000000 |
| rad52                         | 4.17173e-35 | 1.000000 | 4.17173e-35 | 1.000000 |
| rad62                         | 1.46344e-35 | 1.000000 | 1.46344e-35 | 1.000000 |
| rad51                         | 1.08886e-35 | 1.000000 | 1.08886e-35 | 1.000000 |
| rad47                         | 2.21283e-36 | 1.000000 | 2.21283e-36 | 1.000000 |
| rad61                         | 1.73376e-37 | 1.000000 | 1.73376e-37 | 1.000000 |
| rad53                         | 2.87752e-38 | 1.000000 | 2.87752e-38 | 1.000000 |
| rad42                         | 3.60850e-39 | 1.000000 | 3.60850e-39 | 1.000000 |
| rad68syn                      | 4.00025e-40 | 1.000000 | 4.00025e-40 | 1.000000 |
| rad68anti                     | 3.11027e-40 | 1.000000 | 3.11027e-40 | 1.000000 |
| rad65                         | 1.55945e-40 | 1.000000 | 1.55945e-40 | 1.000000 |
| rad56                         | 2.03593e-41 | 1.000000 | 2.03593e-41 | 1.000000 |
| rad40syn                      | 4.12644e-43 | 1.000000 | 4.12644e-43 | 1.000000 |
| rad40anti                     | 2.82062e-43 | 1.000000 | 2.82062e-43 | 1.000000 |

|        |             |         |             |         |
|--------|-------------|---------|-------------|---------|
| PAH8+H | 3.61029e-44 | 1.00000 | 3.61029e-44 | 1.00000 |
| rad64  | 2.08207e-44 | 1.00000 | 2.08207e-44 | 1.00000 |
| rad73  | 5.25342e-48 | 1.00000 | 5.25342e-48 | 1.00000 |
| rad71  | 1.31562e-50 | 1.00000 | 1.31562e-50 | 1.00000 |

100000000. Pa, 160.000000 K

=====

| Rate constant             | True (fraction)        | Effective (fraction)   |
|---------------------------|------------------------|------------------------|
| Total                     | 7.84423e-15 (1.00 )    | 7.84423e-15 (1.00 )    |
| Formation of rad19        | 7.84418e-15 (1.000 )   | 7.84418e-15 (1.000 )   |
| H-abstraction to cyc2enyl | 5.05321e-20 (6.44e-06) | 5.05321e-20 (6.44e-06) |
| H-abstraction to cyclenyl | 1.29479e-24 (1.65e-10) | 1.29479e-24 (1.65e-10) |

| species                       | PYtrue      | Cumul    | PYeffective | Cumul    |
|-------------------------------|-------------|----------|-------------|----------|
| rad19anti                     | 0.975592    | 0.975592 | 0.975592    | 0.975592 |
| rad9                          | 0.0225171   | 0.998109 | 0.0225171   | 0.998109 |
| rad8                          | 0.00188378  | 0.999993 | 0.00188378  | 0.999993 |
| Benzene+cycloprop-2-enylidene | 6.44194e-06 | 0.999999 | 6.44194e-06 | 0.999999 |
| rad12                         | 3.07348e-07 | 0.999999 | 3.07348e-07 | 0.999999 |
| rad15                         | 2.38692e-07 | 1.000000 | 2.38692e-07 | 1.000000 |
| rad19syn                      | 3.00842e-08 | 1.000000 | 3.00842e-08 | 1.000000 |
| Benzene+cycloprop-1-enylidene | 1.65062e-10 | 1.000000 | 1.65062e-10 | 1.000000 |
| rad7                          | 1.18362e-10 | 1.000000 | 1.18362e-10 | 1.000000 |
| Indene+H                      | 4.61950e-11 | 1.000000 | 4.61950e-11 | 1.000000 |
| PhCHCCH2+H                    | 2.32315e-12 | 1.000000 | 2.32315e-12 | 1.000000 |
| rad11                         | 1.07914e-13 | 1.000000 | 1.07914e-13 | 1.000000 |
| rad2                          | 8.94528e-14 | 1.000000 | 8.94528e-14 | 1.000000 |
| rad6                          | 5.81473e-14 | 1.000000 | 5.81473e-14 | 1.000000 |
| PhcycC3H3_A+H                 | 3.62695e-14 | 1.000000 | 3.62695e-14 | 1.000000 |
| Phenyl+cycC3H4                | 2.56308e-14 | 1.000000 | 0.000000    | 1.000000 |
| rad1                          | 2.31724e-14 | 1.000000 | 2.31724e-14 | 1.000000 |
| rad5                          | 1.37120e-14 | 1.000000 | 1.37120e-14 | 1.000000 |
| rad21                         | 7.05000e-15 | 1.000000 | 7.05000e-15 | 1.000000 |
| rad20                         | 1.70477e-15 | 1.000000 | 1.70477e-15 | 1.000000 |
| rad26                         | 1.19008e-15 | 1.000000 | 1.19008e-15 | 1.000000 |
| rad18                         | 4.20052e-16 | 1.000000 | 4.20052e-16 | 1.000000 |
| PhcycC3H3_B+H                 | 7.39409e-17 | 1.000000 | 7.39409e-17 | 1.000000 |
| rad22                         | 3.15669e-17 | 1.000000 | 3.15669e-17 | 1.000000 |
| rad24                         | 6.80742e-18 | 1.000000 | 6.80742e-18 | 1.000000 |
| rad67                         | 5.37528e-18 | 1.000000 | 5.37528e-18 | 1.000000 |
| rad35                         | 2.43031e-18 | 1.000000 | 2.43031e-18 | 1.000000 |
| C2H2+PhCH2                    | 1.79550e-18 | 1.000000 | 1.79550e-18 | 1.000000 |
| rad45                         | 1.68107e-18 | 1.000000 | 1.68107e-18 | 1.000000 |
| rad10                         | 5.66466e-19 | 1.000000 | 5.66466e-19 | 1.000000 |
| PhCCH+CH3                     | 3.53788e-19 | 1.000000 | 3.53788e-19 | 1.000000 |
| rad36                         | 3.22793e-19 | 1.000000 | 3.22793e-19 | 1.000000 |
| rad3                          | 1.32943e-19 | 1.000000 | 1.32943e-19 | 1.000000 |
| rad4                          | 1.04581e-19 | 1.000000 | 1.04581e-19 | 1.000000 |
| PhCCCH3+H                     | 6.61005e-20 | 1.000000 | 6.61005e-20 | 1.000000 |
| rad13                         | 6.44307e-20 | 1.000000 | 6.44307e-20 | 1.000000 |
| Ph+MeAc                       | 5.67029e-20 | 1.000000 | 5.67029e-20 | 1.000000 |
| rad25                         | 1.59430e-20 | 1.000000 | 1.59430e-20 | 1.000000 |
| Ph+Allene                     | 1.22026e-20 | 1.000000 | 1.22026e-20 | 1.000000 |
| rad27                         | 7.63782e-21 | 1.000000 | 7.63782e-21 | 1.000000 |
| rad31                         | 4.05184e-21 | 1.000000 | 4.05184e-21 | 1.000000 |
| PhCH2CCH+H                    | 2.10520e-21 | 1.000000 | 2.10520e-21 | 1.000000 |
| rad33                         | 1.43261e-21 | 1.000000 | 1.43261e-21 | 1.000000 |
| rad23                         | 5.54576e-22 | 1.000000 | 5.54576e-22 | 1.000000 |
| rad30                         | 6.24319e-23 | 1.000000 | 6.24319e-23 | 1.000000 |
| rad37                         | 1.47486e-24 | 1.000000 | 1.47486e-24 | 1.000000 |
| rad28                         | 8.67826e-25 | 1.000000 | 8.67826e-25 | 1.000000 |
| rad60syn                      | 2.03350e-25 | 1.000000 | 2.03350e-25 | 1.000000 |
| rad60anti                     | 9.76764e-26 | 1.000000 | 9.76764e-26 | 1.000000 |
| PAH3+H                        | 7.13381e-26 | 1.000000 | 7.13381e-26 | 1.000000 |
| rad14                         | 6.63119e-26 | 1.000000 | 6.63119e-26 | 1.000000 |
| PAH7+H                        | 3.17236e-26 | 1.000000 | 3.17236e-26 | 1.000000 |
| rad59                         | 1.48625e-26 | 1.000000 | 1.48625e-26 | 1.000000 |
| rad38                         | 4.11431e-27 | 1.000000 | 4.11431e-27 | 1.000000 |
| PAH10+CH3                     | 1.96601e-27 | 1.000000 | 1.96601e-27 | 1.000000 |
| rad43                         | 7.60276e-30 | 1.000000 | 7.60276e-30 | 1.000000 |
| rad46                         | 7.26460e-30 | 1.000000 | 7.26460e-30 | 1.000000 |
| rad58                         | 1.27717e-30 | 1.000000 | 1.27717e-30 | 1.000000 |
| rad70                         | 6.95852e-31 | 1.000000 | 6.95852e-31 | 1.000000 |
| rad54                         | 2.36671e-31 | 1.000000 | 2.36671e-31 | 1.000000 |
| PAH1+H                        | 2.26464e-31 | 1.000000 | 2.26464e-31 | 1.000000 |
| PAH9+H                        | 6.10803e-32 | 1.000000 | 6.10803e-32 | 1.000000 |
| rad50                         | 3.70232e-32 | 1.000000 | 3.70232e-32 | 1.000000 |
| rad34                         | 1.25191e-32 | 1.000000 | 1.25191e-32 | 1.000000 |

|           |             |          |             |          |
|-----------|-------------|----------|-------------|----------|
| rad39     | 5.28733e-33 | 1.000000 | 5.28733e-33 | 1.000000 |
| rad55     | 2.14249e-33 | 1.000000 | 2.14249e-33 | 1.000000 |
| rad41     | 5.98630e-34 | 1.000000 | 5.98630e-34 | 1.000000 |
| rad52     | 9.54297e-35 | 1.000000 | 9.54297e-35 | 1.000000 |
| rad62     | 3.55360e-35 | 1.000000 | 3.55360e-35 | 1.000000 |
| rad51     | 2.69907e-35 | 1.000000 | 2.69907e-35 | 1.000000 |
| rad47     | 6.33538e-36 | 1.000000 | 6.33538e-36 | 1.000000 |
| rad61     | 9.24586e-37 | 1.000000 | 9.24586e-37 | 1.000000 |
| rad53     | 9.68577e-38 | 1.000000 | 9.68577e-38 | 1.000000 |
| rad42     | 1.15684e-38 | 1.000000 | 1.15684e-38 | 1.000000 |
| rad68syn  | 2.70187e-39 | 1.000000 | 2.70187e-39 | 1.000000 |
| rad68anti | 2.08214e-39 | 1.000000 | 2.08214e-39 | 1.000000 |
| rad65     | 4.02685e-40 | 1.000000 | 4.02685e-40 | 1.000000 |
| rad56     | 1.25225e-40 | 1.000000 | 1.25225e-40 | 1.000000 |
| rad40syn  | 4.72402e-42 | 1.000000 | 4.72402e-42 | 1.000000 |
| rad40anti | 3.20089e-42 | 1.000000 | 3.20089e-42 | 1.000000 |
| PAH8+H    | 5.57832e-43 | 1.000000 | 5.57832e-43 | 1.000000 |
| rad64     | 1.06476e-43 | 1.000000 | 1.06476e-43 | 1.000000 |
| rad73     | 6.81215e-47 | 1.000000 | 6.81215e-47 | 1.000000 |
| rad71     | 2.65269e-49 | 1.000000 | 2.65269e-49 | 1.000000 |

100000000. Pa, 170.000000 K

| Rate constant             | True (fraction)        | Effective (fraction)   |
|---------------------------|------------------------|------------------------|
| Total                     | 9.49598e-15 (1.00 )    | 9.49598e-15 (1.00 )    |
| Formation of rad19        | 9.49586e-15 (1.000 )   | 9.49586e-15 (1.000 )   |
| H-abstraction to cyc2enyl | 1.24279e-19 (1.31e-05) | 1.24279e-19 (1.31e-05) |
| H-abstraction to cyclenyl | 6.08025e-24 (6.40e-10) | 6.08025e-24 (6.40e-10) |

| species                       | PYtrue      | Cumul    | PYeffective | Cumul    |
|-------------------------------|-------------|----------|-------------|----------|
| rad19anti                     | 0.973784    | 0.973784 | 0.973784    | 0.973784 |
| rad9                          | 0.0243373   | 0.998122 | 0.0243373   | 0.998122 |
| rad8                          | 0.00186484  | 0.999986 | 0.00186484  | 0.999986 |
| Benzene+cycloprop-2-enylidene | 1.30875e-05 | 0.999999 | 1.30875e-05 | 0.999999 |
| rad12                         | 3.54896e-07 | 1.000000 | 3.54896e-07 | 1.000000 |
| rad15                         | 2.81590e-07 | 1.000000 | 2.81590e-07 | 1.000000 |
| rad19syn                      | 1.76540e-08 | 1.000000 | 1.76540e-08 | 1.000000 |
| Benzene+cycloprop-1-enylidene | 6.40297e-10 | 1.000000 | 6.40297e-10 | 1.000000 |
| rad7                          | 1.32144e-10 | 1.000000 | 1.32144e-10 | 1.000000 |
| Indene+H                      | 5.96620e-11 | 1.000000 | 5.96620e-11 | 1.000000 |
| PhCHCCH2+H                    | 2.91974e-12 | 1.000000 | 2.91974e-12 | 1.000000 |
| rad11                         | 1.37269e-13 | 1.000000 | 1.37269e-13 | 1.000000 |
| rad2                          | 1.12390e-13 | 1.000000 | 1.12390e-13 | 1.000000 |
| rad6                          | 7.12087e-14 | 1.000000 | 7.12087e-14 | 1.000000 |
| PhcycC3H3_A+H                 | 5.41041e-14 | 1.000000 | 5.41041e-14 | 1.000000 |
| Phenyl+cycC3H4                | 3.93271e-14 | 1.000000 | 0.000000    | 1.000000 |
| rad1                          | 2.87324e-14 | 1.000000 | 2.87324e-14 | 1.000000 |
| rad5                          | 1.61192e-14 | 1.000000 | 1.61192e-14 | 1.000000 |
| rad21                         | 9.13115e-15 | 1.000000 | 9.13115e-15 | 1.000000 |
| rad20                         | 2.03295e-15 | 1.000000 | 2.03295e-15 | 1.000000 |
| rad26                         | 1.62268e-15 | 1.000000 | 1.62268e-15 | 1.000000 |
| rad18                         | 5.70734e-16 | 1.000000 | 5.70734e-16 | 1.000000 |
| PhcycC3H3_B+H                 | 1.60048e-16 | 1.000000 | 1.60048e-16 | 1.000000 |
| rad22                         | 4.44287e-17 | 1.000000 | 4.44287e-17 | 1.000000 |
| rad24                         | 9.47471e-18 | 1.000000 | 9.47471e-18 | 1.000000 |
| rad67                         | 7.65629e-18 | 1.000000 | 7.65629e-18 | 1.000000 |
| rad35                         | 3.44730e-18 | 1.000000 | 3.44730e-18 | 1.000000 |
| rad45                         | 2.54990e-18 | 1.000000 | 2.54990e-18 | 1.000000 |
| C2H2+PhCH2                    | 2.37727e-18 | 1.000000 | 2.37727e-18 | 1.000000 |
| rad10                         | 7.96610e-19 | 1.000000 | 7.96610e-19 | 1.000000 |
| rad36                         | 4.83668e-19 | 1.000000 | 4.83668e-19 | 1.000000 |
| PhCCH+CH3                     | 4.71630e-19 | 1.000000 | 4.71630e-19 | 1.000000 |
| rad3                          | 1.89031e-19 | 1.000000 | 1.89031e-19 | 1.000000 |
| rad4                          | 1.48162e-19 | 1.000000 | 1.48162e-19 | 1.000000 |
| PhCCCH3+H                     | 9.65588e-20 | 1.000000 | 9.65588e-20 | 1.000000 |
| rad13                         | 8.80517e-20 | 1.000000 | 8.80517e-20 | 1.000000 |
| Ph+MeAc                       | 8.47637e-20 | 1.000000 | 8.47637e-20 | 1.000000 |
| rad25                         | 2.31984e-20 | 1.000000 | 2.31984e-20 | 1.000000 |
| Ph+Allene                     | 1.85942e-20 | 1.000000 | 1.85942e-20 | 1.000000 |
| rad27                         | 1.09535e-20 | 1.000000 | 1.09535e-20 | 1.000000 |
| rad31                         | 4.67038e-21 | 1.000000 | 4.67038e-21 | 1.000000 |
| PhCH2CCH+H                    | 3.29948e-21 | 1.000000 | 3.29948e-21 | 1.000000 |
| rad33                         | 1.97552e-21 | 1.000000 | 1.97552e-21 | 1.000000 |
| rad23                         | 8.77468e-22 | 1.000000 | 8.77468e-22 | 1.000000 |
| rad30                         | 9.79619e-23 | 1.000000 | 9.79619e-23 | 1.000000 |
| rad37                         | 2.46461e-24 | 1.000000 | 2.46461e-24 | 1.000000 |
| rad28                         | 1.43614e-24 | 1.000000 | 1.43614e-24 | 1.000000 |
| rad60syn                      | 3.33750e-25 | 1.000000 | 3.33750e-25 | 1.000000 |

|           |             |         |             |         |
|-----------|-------------|---------|-------------|---------|
| rad60anti | 1.60967e-25 | 1.00000 | 1.60967e-25 | 1.00000 |
| PAH3+H    | 1.23916e-25 | 1.00000 | 1.23916e-25 | 1.00000 |
| rad14     | 1.10479e-25 | 1.00000 | 1.10479e-25 | 1.00000 |
| PAH7+H    | 5.58309e-26 | 1.00000 | 5.58309e-26 | 1.00000 |
| rad59     | 2.56011e-26 | 1.00000 | 2.56011e-26 | 1.00000 |
| rad38     | 7.44317e-27 | 1.00000 | 7.44317e-27 | 1.00000 |
| PAH10+CH3 | 3.83879e-27 | 1.00000 | 3.83879e-27 | 1.00000 |
| rad43     | 1.49123e-29 | 1.00000 | 1.49123e-29 | 1.00000 |
| rad46     | 1.35734e-29 | 1.00000 | 1.35734e-29 | 1.00000 |
| rad58     | 2.69951e-30 | 1.00000 | 2.69951e-30 | 1.00000 |
| rad70     | 1.52034e-30 | 1.00000 | 1.52034e-30 | 1.00000 |
| PAH1+H    | 5.31443e-31 | 1.00000 | 5.31443e-31 | 1.00000 |
| rad54     | 4.51428e-31 | 1.00000 | 4.51428e-31 | 1.00000 |
| PAH9+H    | 1.17672e-31 | 1.00000 | 1.17672e-31 | 1.00000 |
| rad50     | 7.62978e-32 | 1.00000 | 7.62978e-32 | 1.00000 |
| rad34     | 3.05776e-32 | 1.00000 | 3.05776e-32 | 1.00000 |
| rad39     | 1.12267e-32 | 1.00000 | 1.12267e-32 | 1.00000 |
| rad55     | 4.43360e-33 | 1.00000 | 4.43360e-33 | 1.00000 |
| rad41     | 1.58102e-33 | 1.00000 | 1.58102e-33 | 1.00000 |
| rad52     | 2.23273e-34 | 1.00000 | 2.23273e-34 | 1.00000 |
| rad62     | 8.94791e-35 | 1.00000 | 8.94791e-35 | 1.00000 |
| rad51     | 6.87565e-35 | 1.00000 | 6.87565e-35 | 1.00000 |
| rad47     | 1.87574e-35 | 1.00000 | 1.87574e-35 | 1.00000 |
| rad61     | 4.71294e-36 | 1.00000 | 4.71294e-36 | 1.00000 |
| rad53     | 3.21090e-37 | 1.00000 | 3.21090e-37 | 1.00000 |
| rad42     | 3.85024e-38 | 1.00000 | 3.85024e-38 | 1.00000 |
| rad68syn  | 1.71221e-38 | 1.00000 | 1.71221e-38 | 1.00000 |
| rad68anti | 1.30689e-38 | 1.00000 | 1.30689e-38 | 1.00000 |
| rad65     | 1.08201e-39 | 1.00000 | 1.08201e-39 | 1.00000 |
| rad56     | 7.02039e-40 | 1.00000 | 7.02039e-40 | 1.00000 |
| rad40syn  | 4.84663e-41 | 1.00000 | 4.84663e-41 | 1.00000 |
| rad40anti | 3.25797e-41 | 1.00000 | 3.25797e-41 | 1.00000 |
| PAH8+H    | 7.47412e-42 | 1.00000 | 7.47412e-42 | 1.00000 |
| rad64     | 5.47760e-43 | 1.00000 | 5.47760e-43 | 1.00000 |
| rad73     | 8.10091e-46 | 1.00000 | 8.10091e-46 | 1.00000 |
| rad71     | 4.57783e-48 | 1.00000 | 4.57783e-48 | 1.00000 |

10000000. Pa, 180.000000 K

=====

| Rate constant             | True (fraction)        | Effective (fraction)   |
|---------------------------|------------------------|------------------------|
| Total                     | 1.12884e-14 (1.00 )    | 1.12884e-14 (1.00 )    |
| Formation of rad19        | 1.12881e-14 (1.000 )   | 1.12881e-14 (1.000 )   |
| H-abstraction to cyc2enyl | 2.75916e-19 (2.44e-05) | 2.75916e-19 (2.44e-05) |
| H-abstraction to cyclenyl | 2.39955e-23 (2.13e-09) | 2.39955e-23 (2.13e-09) |

| species                       | PYtrue      | Cumul    | PYeffective | Cumul    |
|-------------------------------|-------------|----------|-------------|----------|
| rad19anti                     | 0.971899    | 0.971899 | 0.971899    | 0.971899 |
| rad9                          | 0.0262298   | 0.998129 | 0.0262298   | 0.998129 |
| rad8                          | 0.00184582  | 0.999975 | 0.00184582  | 0.999975 |
| Benzene+cycloprop-2-enylidene | 2.44424e-05 | 0.999999 | 2.44424e-05 | 0.999999 |
| rad12                         | 4.07746e-07 | 1.000000 | 4.07746e-07 | 1.000000 |
| rad15                         | 3.30692e-07 | 1.000000 | 3.30692e-07 | 1.000000 |
| rad19syn                      | 1.09420e-08 | 1.000000 | 1.09420e-08 | 1.000000 |
| Benzene+cycloprop-1-enylidene | 2.12567e-09 | 1.000000 | 2.12567e-09 | 1.000000 |
| rad7                          | 1.47983e-10 | 1.000000 | 1.47983e-10 | 1.000000 |
| Indene+H                      | 7.66375e-11 | 1.000000 | 7.66375e-11 | 1.000000 |
| PhCHCCH2+H                    | 3.67184e-12 | 1.000000 | 3.67184e-12 | 1.000000 |
| rad11                         | 1.74695e-13 | 1.000000 | 1.74695e-13 | 1.000000 |
| rad2                          | 1.41438e-13 | 1.000000 | 1.41438e-13 | 1.000000 |
| rad6                          | 8.74146e-14 | 1.000000 | 8.74146e-14 | 1.000000 |
| PhcycC3H3_A+H                 | 8.15903e-14 | 1.000000 | 8.15903e-14 | 1.000000 |
| Phenyl+cycC3H4                | 6.01368e-14 | 1.000000 | 0.000000    | 1.000000 |
| rad1                          | 3.57201e-14 | 1.000000 | 3.57201e-14 | 1.000000 |
| rad5                          | 1.89615e-14 | 1.000000 | 1.89615e-14 | 1.000000 |
| rad21                         | 1.18597e-14 | 1.000000 | 1.18597e-14 | 1.000000 |
| rad20                         | 2.43084e-15 | 1.000000 | 2.43084e-15 | 1.000000 |
| rad26                         | 2.20954e-15 | 1.000000 | 2.20954e-15 | 1.000000 |
| rad18                         | 7.74326e-16 | 1.000000 | 7.74326e-16 | 1.000000 |
| PhcycC3H3_B+H                 | 3.39298e-16 | 1.000000 | 3.39298e-16 | 1.000000 |
| rad22                         | 6.26767e-17 | 1.000000 | 6.26767e-17 | 1.000000 |
| rad24                         | 1.32137e-17 | 1.000000 | 1.32137e-17 | 1.000000 |
| rad67                         | 1.09302e-17 | 1.000000 | 1.09302e-17 | 1.000000 |
| rad35                         | 4.89949e-18 | 1.000000 | 4.89949e-18 | 1.000000 |
| rad45                         | 3.87290e-18 | 1.000000 | 3.87290e-18 | 1.000000 |
| C2H2+PhCH2                    | 3.15610e-18 | 1.000000 | 3.15610e-18 | 1.000000 |
| rad10                         | 1.12583e-18 | 1.000000 | 1.12583e-18 | 1.000000 |
| rad36                         | 7.26295e-19 | 1.000000 | 7.26295e-19 | 1.000000 |
| PhCCH+CH3                     | 6.30488e-19 | 1.000000 | 6.30488e-19 | 1.000000 |

|            |             |         |             |         |
|------------|-------------|---------|-------------|---------|
| rad3       | 2.70215e-19 | 1.00000 | 2.70215e-19 | 1.00000 |
| rad4       | 2.11071e-19 | 1.00000 | 2.11071e-19 | 1.00000 |
| PhCCCH3+H  | 1.42242e-19 | 1.00000 | 1.42242e-19 | 1.00000 |
| Ph+MeAc    | 1.27912e-19 | 1.00000 | 1.27912e-19 | 1.00000 |
| rad13      | 1.20771e-19 | 1.00000 | 1.20771e-19 | 1.00000 |
| rad25      | 3.39110e-20 | 1.00000 | 3.39110e-20 | 1.00000 |
| Ph+Allene  | 2.85859e-20 | 1.00000 | 2.85859e-20 | 1.00000 |
| rad27      | 1.58235e-20 | 1.00000 | 1.58235e-20 | 1.00000 |
| rad31      | 5.43468e-21 | 1.00000 | 5.43468e-21 | 1.00000 |
| PhCH2CCH+H | 5.23101e-21 | 1.00000 | 5.23101e-21 | 1.00000 |
| rad33      | 2.73610e-21 | 1.00000 | 2.73610e-21 | 1.00000 |
| rad23      | 1.39545e-21 | 1.00000 | 1.39545e-21 | 1.00000 |
| rad30      | 1.54328e-22 | 1.00000 | 1.54328e-22 | 1.00000 |
| rad37      | 4.15776e-24 | 1.00000 | 4.15776e-24 | 1.00000 |
| rad28      | 2.40311e-24 | 1.00000 | 2.40311e-24 | 1.00000 |
| rad60syn   | 5.52411e-25 | 1.00000 | 5.52411e-25 | 1.00000 |
| rad60anti  | 2.67618e-25 | 1.00000 | 2.67618e-25 | 1.00000 |
| PAH3+H     | 2.18251e-25 | 1.00000 | 2.18251e-25 | 1.00000 |
| rad14      | 1.86548e-25 | 1.00000 | 1.86548e-25 | 1.00000 |
| PAH7+H     | 9.98547e-26 | 1.00000 | 9.98547e-26 | 1.00000 |
| rad59      | 4.46730e-26 | 1.00000 | 4.46730e-26 | 1.00000 |
| rad38      | 1.36846e-26 | 1.00000 | 1.36846e-26 | 1.00000 |
| PAH10+CH3  | 7.65948e-27 | 1.00000 | 7.65948e-27 | 1.00000 |
| rad43      | 3.01795e-29 | 1.00000 | 3.01795e-29 | 1.00000 |
| rad46      | 2.57672e-29 | 1.00000 | 2.57672e-29 | 1.00000 |
| rad58      | 5.85089e-30 | 1.00000 | 5.85089e-30 | 1.00000 |
| rad70      | 3.41883e-30 | 1.00000 | 3.41883e-30 | 1.00000 |
| PAH1+H     | 1.27945e-30 | 1.00000 | 1.27945e-30 | 1.00000 |
| rad54      | 8.78165e-31 | 1.00000 | 8.78165e-31 | 1.00000 |
| PAH9+H     | 2.31264e-31 | 1.00000 | 2.31264e-31 | 1.00000 |
| rad50      | 1.61284e-31 | 1.00000 | 1.61284e-31 | 1.00000 |
| rad34      | 7.69489e-32 | 1.00000 | 7.69489e-32 | 1.00000 |
| rad39      | 2.45443e-32 | 1.00000 | 2.45443e-32 | 1.00000 |
| rad55      | 9.36505e-33 | 1.00000 | 9.36505e-33 | 1.00000 |
| rad41      | 4.32284e-33 | 1.00000 | 4.32284e-33 | 1.00000 |
| rad52      | 5.37780e-34 | 1.00000 | 5.37780e-34 | 1.00000 |
| rad62      | 2.35066e-34 | 1.00000 | 2.35066e-34 | 1.00000 |
| rad51      | 1.81091e-34 | 1.00000 | 1.81091e-34 | 1.00000 |
| rad47      | 5.76420e-35 | 1.00000 | 5.76420e-35 | 1.00000 |
| rad61      | 2.32069e-35 | 1.00000 | 2.32069e-35 | 1.00000 |
| rad53      | 1.04947e-36 | 1.00000 | 1.04947e-36 | 1.00000 |
| rad42      | 1.33605e-37 | 1.00000 | 1.33605e-37 | 1.00000 |
| rad68syn   | 1.03105e-37 | 1.00000 | 1.03105e-37 | 1.00000 |
| rad68anti  | 7.79272e-38 | 1.00000 | 7.79272e-38 | 1.00000 |
| rad56      | 3.62932e-39 | 1.00000 | 3.62932e-39 | 1.00000 |
| rad65      | 3.04401e-39 | 1.00000 | 3.04401e-39 | 1.00000 |
| rad40syn   | 4.49257e-40 | 1.00000 | 4.49257e-40 | 1.00000 |
| rad40anti  | 3.00132e-40 | 1.00000 | 3.00132e-40 | 1.00000 |
| PAH8+H     | 8.70314e-41 | 1.00000 | 8.70314e-41 | 1.00000 |
| rad64      | 2.85254e-42 | 1.00000 | 2.85254e-42 | 1.00000 |
| rad73      | 8.82501e-45 | 1.00000 | 8.82501e-45 | 1.00000 |
| rad71      | 6.74369e-47 | 1.00000 | 6.74369e-47 | 1.00000 |

100000000. Pa, 190.000000 K

| Rate constant             | True (fraction)        | Effective (fraction)   |
|---------------------------|------------------------|------------------------|
| Total                     | 1.32132e-14 (1.00)     | 1.32132e-14 (1.00)     |
| Formation of rad19        | 1.32126e-14 (1.000)    | 1.32126e-14 (1.000)    |
| H-abstraction to cyc2enyl | 5.62053e-19 (4.25e-05) | 5.62053e-19 (4.25e-05) |
| H-abstraction to cyc1enyl | 8.18073e-23 (6.19e-09) | 8.18073e-23 (6.19e-09) |

| species                       | PYtrue      | Cumul    | PYeffective | Cumul    |
|-------------------------------|-------------|----------|-------------|----------|
| rad19anti                     | 0.969923    | 0.969923 | 0.969923    | 0.969923 |
| rad9                          | 0.0282066   | 0.998129 | 0.0282066   | 0.998129 |
| rad8                          | 0.00182687  | 0.999956 | 0.00182687  | 0.999956 |
| Benzene+cycloprop-2-enylidene | 4.25373e-05 | 0.999999 | 4.25373e-05 | 0.999999 |
| rad12                         | 4.66684e-07 | 0.999999 | 4.66684e-07 | 0.999999 |
| rad15                         | 3.87106e-07 | 1.000000 | 3.87106e-07 | 1.000000 |
| rad19syn                      | 7.15895e-09 | 1.000000 | 7.15895e-09 | 1.000000 |
| Benzene+cycloprop-1-enylidene | 6.19133e-09 | 1.000000 | 6.19133e-09 | 1.000000 |
| rad7                          | 1.66297e-10 | 1.000000 | 1.66297e-10 | 1.000000 |
| Indene+H                      | 9.81135e-11 | 1.000000 | 9.81135e-11 | 1.000000 |
| PhCHCCH2+H                    | 4.62891e-12 | 1.000000 | 4.62891e-12 | 1.000000 |
| rad11                         | 2.22865e-13 | 1.000000 | 2.22865e-13 | 1.000000 |
| rad2                          | 1.78597e-13 | 1.000000 | 1.78597e-13 | 1.000000 |
| PhcycC3H3_A+H                 | 1.24473e-13 | 1.000000 | 1.24473e-13 | 1.000000 |
| rad6                          | 1.07669e-13 | 1.000000 | 1.07669e-13 | 1.000000 |
| Phenyl+cycC3H4                | 9.16795e-14 | 1.000000 | 0.000000    | 1.000000 |

|               |             |          |             |          |
|---------------|-------------|----------|-------------|----------|
| rad1          | 4.45977e-14 | 1.000000 | 4.45977e-14 | 1.000000 |
| rad5          | 2.23411e-14 | 1.000000 | 2.23411e-14 | 1.000000 |
| rad21         | 1.54776e-14 | 1.000000 | 1.54776e-14 | 1.000000 |
| rad26         | 3.01202e-15 | 1.000000 | 3.01202e-15 | 1.000000 |
| rad20         | 2.91860e-15 | 1.000000 | 2.91860e-15 | 1.000000 |
| rad18         | 1.05166e-15 | 1.000000 | 1.05166e-15 | 1.000000 |
| PhcycC3H3_B+H | 7.08630e-16 | 1.000000 | 7.08630e-16 | 1.000000 |
| rad22         | 8.88687e-17 | 1.000000 | 8.88687e-17 | 1.000000 |
| rad24         | 1.85133e-17 | 1.000000 | 1.85133e-17 | 1.000000 |
| rad67         | 1.56857e-17 | 1.000000 | 1.56857e-17 | 1.000000 |
| rad35         | 6.99739e-18 | 1.000000 | 6.99739e-18 | 1.000000 |
| rad45         | 5.91010e-18 | 1.000000 | 5.91010e-18 | 1.000000 |
| C2H2+PhCH2    | 4.20961e-18 | 1.000000 | 4.20961e-18 | 1.000000 |
| rad10         | 1.60341e-18 | 1.000000 | 1.60341e-18 | 1.000000 |
| rad36         | 1.09662e-18 | 1.000000 | 1.09662e-18 | 1.000000 |
| PhCCH+CH3     | 8.46633e-19 | 1.000000 | 8.46633e-19 | 1.000000 |
| rad3          | 3.89448e-19 | 1.000000 | 3.89448e-19 | 1.000000 |
| rad4          | 3.03230e-19 | 1.000000 | 3.03230e-19 | 1.000000 |
| PhCCCH3+H     | 2.11991e-19 | 1.000000 | 2.11991e-19 | 1.000000 |
| Ph+MeAc       | 1.95536e-19 | 1.000000 | 1.95536e-19 | 1.000000 |
| rad13         | 1.66502e-19 | 1.000000 | 1.66502e-19 | 1.000000 |
| rad25         | 4.99578e-20 | 1.000000 | 4.99578e-20 | 1.000000 |
| Ph+Allene     | 4.44971e-20 | 1.000000 | 4.44971e-20 | 1.000000 |
| rad27         | 2.30935e-20 | 1.000000 | 2.30935e-20 | 1.000000 |
| PhCH2CCH+H    | 8.42064e-21 | 1.000000 | 8.42064e-21 | 1.000000 |
| rad31         | 6.39510e-21 | 1.000000 | 6.39510e-21 | 1.000000 |
| rad33         | 3.81178e-21 | 1.000000 | 3.81178e-21 | 1.000000 |
| rad23         | 2.23931e-21 | 1.000000 | 2.23931e-21 | 1.000000 |
| rad30         | 2.45085e-22 | 1.000000 | 2.45085e-22 | 1.000000 |
| rad37         | 7.11161e-24 | 1.000000 | 7.11161e-24 | 1.000000 |
| rad28         | 4.08232e-24 | 1.000000 | 4.08232e-24 | 1.000000 |
| rad60syn      | 9.26194e-25 | 1.000000 | 9.26194e-25 | 1.000000 |
| rad60anti     | 4.50896e-25 | 1.000000 | 4.50896e-25 | 1.000000 |
| PAH3+H        | 3.91659e-25 | 1.000000 | 3.91659e-25 | 1.000000 |
| rad14         | 3.20711e-25 | 1.000000 | 3.20711e-25 | 1.000000 |
| PAH7+H        | 1.82354e-25 | 1.000000 | 1.82354e-25 | 1.000000 |
| rad59         | 7.93448e-26 | 1.000000 | 7.93448e-26 | 1.000000 |
| rad38         | 2.56877e-26 | 1.000000 | 2.56877e-26 | 1.000000 |
| PAH10+CH3     | 1.56886e-26 | 1.000000 | 1.56886e-26 | 1.000000 |
| rad43         | 6.33202e-29 | 1.000000 | 6.33202e-29 | 1.000000 |
| rad46         | 4.99780e-29 | 1.000000 | 4.99780e-29 | 1.000000 |
| rad58         | 1.30607e-29 | 1.000000 | 1.30607e-29 | 1.000000 |
| rad70         | 7.94826e-30 | 1.000000 | 7.94826e-30 | 1.000000 |
| PAH1+H        | 3.17190e-30 | 1.000000 | 3.17190e-30 | 1.000000 |
| rad54         | 1.74221e-30 | 1.000000 | 1.74221e-30 | 1.000000 |
| PAH9+H        | 4.66698e-31 | 1.000000 | 4.66698e-31 | 1.000000 |
| rad50         | 3.51849e-31 | 1.000000 | 3.51849e-31 | 1.000000 |
| rad34         | 2.00308e-31 | 1.000000 | 2.00308e-31 | 1.000000 |
| rad39         | 5.56066e-32 | 1.000000 | 5.56066e-32 | 1.000000 |
| rad55         | 2.01671e-32 | 1.000000 | 2.01671e-32 | 1.000000 |
| rad41         | 1.22813e-32 | 1.000000 | 1.22813e-32 | 1.000000 |
| rad52         | 1.34188e-33 | 1.000000 | 1.34188e-33 | 1.000000 |
| rad62         | 6.48193e-34 | 1.000000 | 6.48193e-34 | 1.000000 |
| rad51         | 4.96037e-34 | 1.000000 | 4.96037e-34 | 1.000000 |
| rad47         | 1.84565e-34 | 1.000000 | 1.84565e-34 | 1.000000 |
| rad61         | 1.11495e-34 | 1.000000 | 1.11495e-34 | 1.000000 |
| rad53         | 3.38354e-36 | 1.000000 | 3.38354e-36 | 1.000000 |
| rad68syn      | 5.96168e-37 | 1.000000 | 5.96168e-37 | 1.000000 |
| rad42         | 4.85592e-37 | 1.000000 | 4.85592e-37 | 1.000000 |
| rad68anti     | 4.46290e-37 | 1.000000 | 4.46290e-37 | 1.000000 |
| rad56         | 1.74688e-38 | 1.000000 | 1.74688e-38 | 1.000000 |
| rad65         | 9.02279e-39 | 1.000000 | 9.02279e-39 | 1.000000 |
| rad40syn      | 3.78203e-39 | 1.000000 | 3.78203e-39 | 1.000000 |
| rad40anti     | 2.51708e-39 | 1.000000 | 2.51708e-39 | 1.000000 |
| PAH8+H        | 8.83341e-40 | 1.000000 | 8.83341e-40 | 1.000000 |
| rad64         | 1.50839e-41 | 1.000000 | 1.50839e-41 | 1.000000 |
| rad73         | 8.76777e-44 | 1.000000 | 8.76777e-44 | 1.000000 |
| rad71         | 8.49032e-46 | 1.000000 | 8.49032e-46 | 1.000000 |

100000000. Pa, 200.000000 K

| Rate constant             | True (fraction)        | Effective (fraction)   |
|---------------------------|------------------------|------------------------|
| Total                     | 1.52621e-14 (1.00 )    | 1.52621e-14 (1.00 )    |
| Formation of rad19        | 1.52610e-14 (1.000 )   | 1.52610e-14 (1.000 )   |
| H-abstraction to cyc2enyl | 1.06427e-18 (6.97e-05) | 1.06427e-18 (6.97e-05) |
| H-abstraction to cyclenyl | 2.46309e-22 (1.61e-08) | 2.46309e-22 (1.61e-08) |

  

| species | PYtrue | Cumul | PYeffective | Cumul |
|---------|--------|-------|-------------|-------|
| -----   |        |       |             |       |



|                               |             |          |             |          |
|-------------------------------|-------------|----------|-------------|----------|
| rad19anti                     | 0.967839    | 0.967839 | 0.967839    | 0.967839 |
| rad9                          | 0.0302815   | 0.998121 | 0.0302815   | 0.998121 |
| rad8                          | 0.00180801  | 0.999929 | 0.00180801  | 0.999929 |
| Benzene+cycloprop-2-enylidene | 6.97330e-05 | 0.999999 | 6.97330e-05 | 0.999999 |
| rad12                         | 5.32668e-07 | 0.999999 | 5.32668e-07 | 0.999999 |
| rad15                         | 4.52216e-07 | 1.000000 | 4.52216e-07 | 1.000000 |
| Benzene+cycloprop-1-enylidene | 1.61386e-08 | 1.000000 | 1.61386e-08 | 1.000000 |
| rad19syn                      | 4.94259e-09 | 1.000000 | 4.94259e-09 | 1.000000 |
| rad7                          | 1.87585e-10 | 1.000000 | 1.87585e-10 | 1.000000 |
| Indene+H                      | 1.25424e-10 | 1.000000 | 1.25424e-10 | 1.000000 |
| PhCHCCH2+H                    | 5.85967e-12 | 1.000000 | 5.85967e-12 | 1.000000 |
| rad11                         | 2.85531e-13 | 1.000000 | 2.85531e-13 | 1.000000 |
| rad2                          | 2.26666e-13 | 1.000000 | 2.26666e-13 | 1.000000 |
| PhcycC3H3_A+H                 | 1.92260e-13 | 1.000000 | 1.92260e-13 | 1.000000 |
| Phenyl+cycC3H4                | 1.39360e-13 | 1.000000 | 0.000000    | 1.000000 |
| rad6                          | 1.33161e-13 | 1.000000 | 1.33161e-13 | 1.000000 |
| rad1                          | 5.60104e-14 | 1.000000 | 5.60104e-14 | 1.000000 |
| rad5                          | 2.63863e-14 | 1.000000 | 2.63863e-14 | 1.000000 |
| rad21                         | 2.03352e-14 | 1.000000 | 2.03352e-14 | 1.000000 |
| rad26                         | 4.12017e-15 | 1.000000 | 4.12017e-15 | 1.000000 |
| rad20                         | 3.52360e-15 | 1.000000 | 3.52360e-15 | 1.000000 |
| PhcycC3H3_B+H                 | 1.46596e-15 | 1.000000 | 1.46596e-15 | 1.000000 |
| rad18                         | 1.43327e-15 | 1.000000 | 1.43327e-15 | 1.000000 |
| rad22                         | 1.26981e-16 | 1.000000 | 1.26981e-16 | 1.000000 |
| rad24                         | 2.61221e-17 | 1.000000 | 2.61221e-17 | 1.000000 |
| rad67                         | 2.26917e-17 | 1.000000 | 2.26917e-17 | 1.000000 |
| rad35                         | 1.00704e-17 | 1.000000 | 1.00704e-17 | 1.000000 |
| rad45                         | 9.09083e-18 | 1.000000 | 9.09083e-18 | 1.000000 |
| C2H2+PhCH2                    | 5.65097e-18 | 1.000000 | 5.65097e-18 | 1.000000 |
| rad10                         | 2.30755e-18 | 1.000000 | 2.30755e-18 | 1.000000 |
| rad36                         | 1.67014e-18 | 1.000000 | 1.67014e-18 | 1.000000 |
| PhCCH+CH3                     | 1.14351e-18 | 1.000000 | 1.14351e-18 | 1.000000 |
| rad3                          | 5.67541e-19 | 1.000000 | 5.67541e-19 | 1.000000 |
| rad4                          | 4.40567e-19 | 1.000000 | 4.40567e-19 | 1.000000 |
| PhCCCH3+H                     | 3.20686e-19 | 1.000000 | 3.20686e-19 | 1.000000 |
| Ph+MeAc                       | 3.03853e-19 | 1.000000 | 3.03853e-19 | 1.000000 |
| rad13                         | 2.30992e-19 | 1.000000 | 2.30992e-19 | 1.000000 |
| rad25                         | 7.44058e-20 | 1.000000 | 7.44058e-20 | 1.000000 |
| Ph+Allene                     | 7.03820e-20 | 1.000000 | 7.03820e-20 | 1.000000 |
| rad27                         | 3.41499e-20 | 1.000000 | 3.41499e-20 | 1.000000 |
| PhCH2CCH+H                    | 1.38151e-20 | 1.000000 | 1.38151e-20 | 1.000000 |
| rad31                         | 7.62277e-21 | 1.000000 | 7.62277e-21 | 1.000000 |
| rad33                         | 5.34733e-21 | 1.000000 | 5.34733e-21 | 1.000000 |
| rad23                         | 3.64016e-21 | 1.000000 | 3.64016e-21 | 1.000000 |
| rad30                         | 3.93912e-22 | 1.000000 | 3.93912e-22 | 1.000000 |
| rad37                         | 1.23862e-23 | 1.000000 | 1.23862e-23 | 1.000000 |
| rad28                         | 7.06880e-24 | 1.000000 | 7.06880e-24 | 1.000000 |
| rad60syn                      | 1.58008e-24 | 1.000000 | 1.58008e-24 | 1.000000 |
| rad60anti                     | 7.73343e-25 | 1.000000 | 7.73343e-25 | 1.000000 |
| PAH3+H                        | 7.19676e-25 | 1.000000 | 7.19676e-25 | 1.000000 |
| rad14                         | 5.64004e-25 | 1.000000 | 5.64004e-25 | 1.000000 |
| PAH7+H                        | 3.41671e-25 | 1.000000 | 3.41671e-25 | 1.000000 |
| rad59                         | 1.44138e-25 | 1.000000 | 1.44138e-25 | 1.000000 |
| rad38                         | 4.94620e-26 | 1.000000 | 4.94620e-26 | 1.000000 |
| PAH10+CH3                     | 3.31426e-26 | 1.000000 | 3.31426e-26 | 1.000000 |
| rad43                         | 1.38436e-28 | 1.000000 | 1.38436e-28 | 1.000000 |
| rad46                         | 9.96140e-29 | 1.000000 | 9.96140e-29 | 1.000000 |
| rad58                         | 3.01706e-29 | 1.000000 | 3.01706e-29 | 1.000000 |
| rad70                         | 1.91963e-29 | 1.000000 | 1.91963e-29 | 1.000000 |
| PAH1+H                        | 8.13146e-30 | 1.000000 | 8.13146e-30 | 1.000000 |
| rad54                         | 3.52162e-30 | 1.000000 | 3.52162e-30 | 1.000000 |
| PAH9+H                        | 9.73752e-31 | 1.000000 | 9.73752e-31 | 1.000000 |
| rad50                         | 7.97197e-31 | 1.000000 | 7.97197e-31 | 1.000000 |
| rad34                         | 5.41791e-31 | 1.000000 | 5.41791e-31 | 1.000000 |
| rad39                         | 1.31444e-31 | 1.000000 | 1.31444e-31 | 1.000000 |
| rad55                         | 4.41861e-32 | 1.000000 | 4.41861e-32 | 1.000000 |
| rad41                         | 3.64118e-32 | 1.000000 | 3.64118e-32 | 1.000000 |
| rad52                         | 3.49129e-33 | 1.000000 | 3.49129e-33 | 1.000000 |
| rad62                         | 1.88790e-33 | 1.000000 | 1.88790e-33 | 1.000000 |
| rad51                         | 1.42167e-33 | 1.000000 | 1.42167e-33 | 1.000000 |
| rad47                         | 6.17993e-34 | 1.000000 | 6.17993e-34 | 1.000000 |
| rad61                         | 5.26233e-34 | 1.000000 | 5.26233e-34 | 1.000000 |
| rad53                         | 1.07581e-35 | 1.000000 | 1.07581e-35 | 1.000000 |
| rad68syn                      | 3.32611e-36 | 1.000000 | 3.32611e-36 | 1.000000 |
| rad68anti                     | 2.46819e-36 | 1.000000 | 2.46819e-36 | 1.000000 |
| rad42                         | 1.85503e-36 | 1.000000 | 1.85503e-36 | 1.000000 |
| rad56                         | 7.88069e-38 | 1.000000 | 7.88069e-38 | 1.000000 |
| rad40syn                      | 2.89460e-38 | 1.000000 | 2.89460e-38 | 1.000000 |
| rad65                         | 2.83490e-38 | 1.000000 | 2.83490e-38 | 1.000000 |
| rad40anti                     | 1.92420e-38 | 1.000000 | 1.92420e-38 | 1.000000 |

|        |             |          |             |          |
|--------|-------------|----------|-------------|----------|
| PAH8+H | 7.83849e-39 | 1.000000 | 7.83849e-39 | 1.000000 |
| rad64  | 8.06465e-41 | 1.000000 | 8.06465e-41 | 1.000000 |
| rad73  | 7.89384e-43 | 1.000000 | 7.89384e-43 | 1.000000 |
| rad71  | 9.17332e-45 | 1.000000 | 9.17332e-45 | 1.000000 |

100000000. Pa, 210.000000 K

=====

| Rate constant             | True (fraction)        | Effective (fraction)   |
|---------------------------|------------------------|------------------------|
| Total                     | 1.74272e-14 (1.00 )    | 1.74272e-14 (1.00 )    |
| Formation of rad19        | 1.74253e-14 (1.000 )   | 1.74253e-14 (1.000 )   |
| H-abstraction to cyc2enyl | 1.89310e-18 (0.000109) | 1.89310e-18 (0.000109) |
| H-abstraction to cyclenyl | 6.66714e-22 (3.83e-08) | 6.66714e-22 (3.83e-08) |

| species                       | PYtrue      | Cumul    | PYeffective | Cumul    |
|-------------------------------|-------------|----------|-------------|----------|
| rad19anti                     | 0.965631    | 0.965631 | 0.965631    | 0.965631 |
| rad9                          | 0.0324699   | 0.998101 | 0.0324699   | 0.998101 |
| rad8                          | 0.00178931  | 0.999890 | 0.00178931  | 0.999890 |
| Benzene+cycloprop-2-enylidene | 0.000108629 | 0.999999 | 0.000108629 | 0.999999 |
| rad12                         | 6.06868e-07 | 0.999999 | 6.06868e-07 | 0.999999 |
| rad15                         | 5.27766e-07 | 1.000000 | 5.27766e-07 | 1.000000 |
| Benzene+cycloprop-1-enylidene | 3.82571e-08 | 1.000000 | 3.82571e-08 | 1.000000 |
| rad19syn                      | 3.60047e-09 | 1.000000 | 3.60047e-09 | 1.000000 |
| rad7                          | 2.12441e-10 | 1.000000 | 2.12441e-10 | 1.000000 |
| Indene+H                      | 1.60389e-10 | 1.000000 | 1.60389e-10 | 1.000000 |
| PhCHCCH2+H                    | 7.46107e-12 | 1.000000 | 7.46107e-12 | 1.000000 |
| rad11                         | 3.68039e-13 | 1.000000 | 3.68039e-13 | 1.000000 |
| PhcycC3H3_A+H                 | 3.00990e-13 | 1.000000 | 3.00990e-13 | 1.000000 |
| rad2                          | 2.89624e-13 | 1.000000 | 2.89624e-13 | 1.000000 |
| Phenyl+cycC3H4                | 2.11215e-13 | 1.000000 | 0.000000    | 1.000000 |
| rad6                          | 1.65447e-13 | 1.000000 | 1.65447e-13 | 1.000000 |
| rad1                          | 7.08742e-14 | 1.000000 | 7.08742e-14 | 1.000000 |
| rad5                          | 3.12581e-14 | 1.000000 | 3.12581e-14 | 1.000000 |
| rad21                         | 2.69486e-14 | 1.000000 | 2.69486e-14 | 1.000000 |
| rad26                         | 5.66831e-15 | 1.000000 | 5.66831e-15 | 1.000000 |
| rad20                         | 4.28396e-15 | 1.000000 | 4.28396e-15 | 1.000000 |
| PhcycC3H3_B+H                 | 3.01972e-15 | 1.000000 | 3.01972e-15 | 1.000000 |
| rad18                         | 1.96473e-15 | 1.000000 | 1.96473e-15 | 1.000000 |
| rad22                         | 1.83331e-16 | 1.000000 | 1.83331e-16 | 1.000000 |
| rad24                         | 3.72092e-17 | 1.000000 | 3.72092e-17 | 1.000000 |
| rad67                         | 3.31860e-17 | 1.000000 | 3.31860e-17 | 1.000000 |
| rad35                         | 1.46457e-17 | 1.000000 | 1.46457e-17 | 1.000000 |
| rad45                         | 1.41408e-17 | 1.000000 | 1.41408e-17 | 1.000000 |
| C2H2+PhCH2                    | 7.64803e-18 | 1.000000 | 7.64803e-18 | 1.000000 |
| rad10                         | 3.36533e-18 | 1.000000 | 3.36533e-18 | 1.000000 |
| rad36                         | 2.57391e-18 | 1.000000 | 2.57391e-18 | 1.000000 |
| PhCCH+CH3                     | 1.55511e-18 | 1.000000 | 1.55511e-18 | 1.000000 |
| rad3                          | 8.38791e-19 | 1.000000 | 8.38791e-19 | 1.000000 |
| rad4                          | 6.49298e-19 | 1.000000 | 6.49298e-19 | 1.000000 |
| PhCCCH3+H                     | 4.94101e-19 | 1.000000 | 4.94101e-19 | 1.000000 |
| Ph+MeAc                       | 4.81754e-19 | 1.000000 | 4.81754e-19 | 1.000000 |
| rad13                         | 3.22721e-19 | 1.000000 | 3.22721e-19 | 1.000000 |
| Ph+Allene                     | 1.13546e-19 | 1.000000 | 1.13546e-19 | 1.000000 |
| rad25                         | 1.12396e-19 | 1.000000 | 1.12396e-19 | 1.000000 |
| rad27                         | 5.13282e-20 | 1.000000 | 5.13282e-20 | 1.000000 |
| PhCH2CCH+H                    | 2.31931e-20 | 1.000000 | 2.31931e-20 | 1.000000 |
| rad31                         | 9.22031e-21 | 1.000000 | 9.22031e-21 | 1.000000 |
| rad33                         | 7.55912e-21 | 1.000000 | 7.55912e-21 | 1.000000 |
| rad23                         | 6.01860e-21 | 1.000000 | 6.01860e-21 | 1.000000 |
| rad30                         | 6.43416e-22 | 1.000000 | 6.43416e-22 | 1.000000 |
| rad37                         | 2.20668e-23 | 1.000000 | 2.20668e-23 | 1.000000 |
| rad28                         | 1.25308e-23 | 1.000000 | 1.25308e-23 | 1.000000 |
| rad60syn                      | 2.75591e-24 | 1.000000 | 2.75591e-24 | 1.000000 |
| PAH3+H                        | 1.36135e-24 | 1.000000 | 1.36135e-24 | 1.000000 |
| rad60anti                     | 1.35673e-24 | 1.000000 | 1.35673e-24 | 1.000000 |
| rad14                         | 1.01981e-24 | 1.000000 | 1.01981e-24 | 1.000000 |
| PAH7+H                        | 6.60269e-25 | 1.000000 | 6.60269e-25 | 1.000000 |
| rad59                         | 2.69212e-25 | 1.000000 | 2.69212e-25 | 1.000000 |
| rad38                         | 9.81886e-26 | 1.000000 | 9.81886e-26 | 1.000000 |
| PAH10+CH3                     | 7.25816e-26 | 1.000000 | 7.25816e-26 | 1.000000 |
| rad43                         | 3.17186e-28 | 1.000000 | 3.17186e-28 | 1.000000 |
| rad46                         | 2.05309e-28 | 1.000000 | 2.05309e-28 | 1.000000 |
| rad58                         | 7.24979e-29 | 1.000000 | 7.24979e-29 | 1.000000 |
| rad70                         | 4.84086e-29 | 1.000000 | 4.84086e-29 | 1.000000 |
| PAH1+H                        | 2.16523e-29 | 1.000000 | 2.16523e-29 | 1.000000 |
| rad54                         | 7.24062e-30 | 1.000000 | 7.24062e-30 | 1.000000 |
| PAH9+H                        | 2.11673e-30 | 1.000000 | 2.11673e-30 | 1.000000 |
| rad50                         | 1.88880e-30 | 1.000000 | 1.88880e-30 | 1.000000 |
| rad34                         | 1.52924e-30 | 1.000000 | 1.52924e-30 | 1.000000 |

|           |             |         |             |         |
|-----------|-------------|---------|-------------|---------|
| rad39     | 3.26556e-31 | 1.00000 | 3.26556e-31 | 1.00000 |
| rad41     | 1.13063e-31 | 1.00000 | 1.13063e-31 | 1.00000 |
| rad55     | 9.82508e-32 | 1.00000 | 9.82508e-32 | 1.00000 |
| rad52     | 9.53330e-33 | 1.00000 | 9.53330e-33 | 1.00000 |
| rad62     | 5.83811e-33 | 1.00000 | 5.83811e-33 | 1.00000 |
| rad51     | 4.28657e-33 | 1.00000 | 4.28657e-33 | 1.00000 |
| rad61     | 2.44250e-33 | 1.00000 | 2.44250e-33 | 1.00000 |
| rad47     | 2.16647e-33 | 1.00000 | 2.16647e-33 | 1.00000 |
| rad53     | 3.36943e-35 | 1.00000 | 3.36943e-35 | 1.00000 |
| rad68syn  | 1.78618e-35 | 1.00000 | 1.78618e-35 | 1.00000 |
| rad68anti | 1.31551e-35 | 1.00000 | 1.31551e-35 | 1.00000 |
| rad42     | 7.43724e-36 | 1.00000 | 7.43724e-36 | 1.00000 |
| rad56     | 3.34334e-37 | 1.00000 | 3.34334e-37 | 1.00000 |
| rad40syn  | 2.01006e-37 | 1.00000 | 2.01006e-37 | 1.00000 |
| rad40anti | 1.33781e-37 | 1.00000 | 1.33781e-37 | 1.00000 |
| rad65     | 9.47137e-38 | 1.00000 | 9.47137e-38 | 1.00000 |
| PAH8+H    | 6.09940e-38 | 1.00000 | 6.09940e-38 | 1.00000 |
| rad64     | 4.30018e-40 | 1.00000 | 4.30018e-40 | 1.00000 |
| rad73     | 6.40143e-42 | 1.00000 | 6.40143e-42 | 1.00000 |
| rad71     | 8.55466e-44 | 1.00000 | 8.55466e-44 | 1.00000 |

100000000. Pa, 220.000000 K

| Rate constant             | True (fraction)        | Effective (fraction)   |
|---------------------------|------------------------|------------------------|
| Total                     | 1.97009e-14 (1.00 )    | 1.97009e-14 (1.00 )    |
| Formation of rad19        | 1.96977e-14 (1.000 )   | 1.96977e-14 (1.000 )   |
| H-abstraction to cyc2enyl | 3.19064e-18 (0.000162) | 3.19064e-18 (0.000162) |
| H-abstraction to cyclenyl | 1.64627e-21 (8.36e-08) | 1.64627e-21 (8.36e-08) |

| species                       | PYtrue      | Cumul    | PYeffective | Cumul    |
|-------------------------------|-------------|----------|-------------|----------|
| rad19anti                     | 0.963277    | 0.963277 | 0.963277    | 0.963277 |
| rad9                          | 0.0347895   | 0.998066 | 0.0347895   | 0.998066 |
| rad8                          | 0.00177073  | 0.999837 | 0.00177073  | 0.999837 |
| Benzene+cycloprop-2-enylidene | 0.000161954 | 0.999999 | 0.000161954 | 0.999999 |
| rad12                         | 6.90723e-07 | 1.000000 | 6.90723e-07 | 1.000000 |
| rad15                         | 6.15961e-07 | 1.00000  | 6.15961e-07 | 1.00000  |
| Benzene+cycloprop-1-enylidene | 8.35632e-08 | 1.00000  | 8.35632e-08 | 1.00000  |
| rad19syn                      | 2.76735e-09 | 1.00000  | 2.76735e-09 | 1.00000  |
| rad7                          | 2.41577e-10 | 1.00000  | 2.41577e-10 | 1.00000  |
| Indene+H                      | 2.05521e-10 | 1.00000  | 2.05521e-10 | 1.00000  |
| PhCHCCH2+H                    | 9.57239e-12 | 1.00000  | 9.57239e-12 | 1.00000  |
| PhcycC3H3_A+H                 | 4.78304e-13 | 1.00000  | 4.78304e-13 | 1.00000  |
| rad11                         | 4.78151e-13 | 1.00000  | 4.78151e-13 | 1.00000  |
| rad2                          | 3.73233e-13 | 1.00000  | 3.73233e-13 | 1.00000  |
| Phenyl+cycC3H4                | 3.19127e-13 | 1.00000  | 0.00000     | 1.00000  |
| rad6                          | 2.06582e-13 | 1.00000  | 2.06582e-13 | 1.00000  |
| rad1                          | 9.05134e-14 | 1.00000  | 9.05134e-14 | 1.00000  |
| rad5                          | 3.71606e-14 | 1.00000  | 3.71606e-14 | 1.00000  |
| rad21                         | 3.60943e-14 | 1.00000  | 3.60943e-14 | 1.00000  |
| rad26                         | 7.86086e-15 | 1.00000  | 7.86086e-15 | 1.00000  |
| PhcycC3H3_B+H                 | 6.22561e-15 | 1.00000  | 6.22561e-15 | 1.00000  |
| rad20                         | 5.25392e-15 | 1.00000  | 5.25392e-15 | 1.00000  |
| rad18                         | 2.71553e-15 | 1.00000  | 2.71553e-15 | 1.00000  |
| rad22                         | 2.68203e-16 | 1.00000  | 2.68203e-16 | 1.00000  |
| rad24                         | 5.36426e-17 | 1.00000  | 5.36426e-17 | 1.00000  |
| rad67                         | 4.92134e-17 | 1.00000  | 4.92134e-17 | 1.00000  |
| rad45                         | 2.23203e-17 | 1.00000  | 2.23203e-17 | 1.00000  |
| rad35                         | 2.15884e-17 | 1.00000  | 2.15884e-17 | 1.00000  |
| C2H2+PhCH2                    | 1.04556e-17 | 1.00000  | 1.04556e-17 | 1.00000  |
| rad10                         | 4.98938e-18 | 1.00000  | 4.98938e-18 | 1.00000  |
| rad36                         | 4.02764e-18 | 1.00000  | 4.02764e-18 | 1.00000  |
| PhCCH+CH3                     | 2.13108e-18 | 1.00000  | 2.13108e-18 | 1.00000  |
| rad3                          | 1.26141e-18 | 1.00000  | 1.26141e-18 | 1.00000  |
| rad4                          | 9.73871e-19 | 1.00000  | 9.73871e-19 | 1.00000  |
| Ph+MeAc                       | 7.82518e-19 | 1.00000  | 7.82518e-19 | 1.00000  |
| PhCCCH3+H                     | 7.78401e-19 | 1.00000  | 7.78401e-19 | 1.00000  |
| rad13                         | 4.54269e-19 | 1.00000  | 4.54269e-19 | 1.00000  |
| Ph+Allene                     | 1.87613e-19 | 1.00000  | 1.87613e-19 | 1.00000  |
| rad25                         | 1.72804e-19 | 1.00000  | 1.72804e-19 | 1.00000  |
| rad27                         | 7.86874e-20 | 1.00000  | 7.86874e-20 | 1.00000  |
| PhCH2CCH+H                    | 4.00224e-20 | 1.00000  | 4.00224e-20 | 1.00000  |
| rad31                         | 1.13393e-20 | 1.00000  | 1.13393e-20 | 1.00000  |
| rad33                         | 1.07721e-20 | 1.00000  | 1.07721e-20 | 1.00000  |
| rad23                         | 1.01670e-20 | 1.00000  | 1.01670e-20 | 1.00000  |
| rad30                         | 1.07295e-21 | 1.00000  | 1.07295e-21 | 1.00000  |
| rad37                         | 4.04158e-23 | 1.00000  | 4.04158e-23 | 1.00000  |
| rad28                         | 2.28542e-23 | 1.00000  | 2.28542e-23 | 1.00000  |
| rad60syn                      | 4.94055e-24 | 1.00000  | 4.94055e-24 | 1.00000  |

|           |             |         |             |         |
|-----------|-------------|---------|-------------|---------|
| PAH3+H    | 2.66691e-24 | 1.00000 | 2.66691e-24 | 1.00000 |
| rad60anti | 2.44784e-24 | 1.00000 | 2.44784e-24 | 1.00000 |
| rad14     | 1.90705e-24 | 1.00000 | 1.90705e-24 | 1.00000 |
| PAH7+H    | 1.32367e-24 | 1.00000 | 1.32367e-24 | 1.00000 |
| rad59     | 5.19997e-25 | 1.00000 | 5.19997e-25 | 1.00000 |
| rad38     | 2.02063e-25 | 1.00000 | 2.02063e-25 | 1.00000 |
| PAH10+CH3 | 1.65648e-25 | 1.00000 | 1.65648e-25 | 1.00000 |
| rad43     | 7.65890e-28 | 1.00000 | 7.65890e-28 | 1.00000 |
| rad46     | 4.40560e-28 | 1.00000 | 4.40560e-28 | 1.00000 |
| rad58     | 1.82086e-28 | 1.00000 | 1.82086e-28 | 1.00000 |
| rad70     | 1.27978e-28 | 1.00000 | 1.27978e-28 | 1.00000 |
| PAH1+H    | 6.00710e-29 | 1.00000 | 6.00710e-29 | 1.00000 |
| rad54     | 1.51092e-29 | 1.00000 | 1.51092e-29 | 1.00000 |
| PAH9+H    | 4.83311e-30 | 1.00000 | 4.83311e-30 | 1.00000 |
| rad50     | 4.71045e-30 | 1.00000 | 4.71045e-30 | 1.00000 |
| rad34     | 4.51231e-30 | 1.00000 | 4.51231e-30 | 1.00000 |
| rad39     | 8.58072e-31 | 1.00000 | 8.58072e-31 | 1.00000 |
| rad41     | 3.67470e-31 | 1.00000 | 3.67470e-31 | 1.00000 |
| rad55     | 2.21064e-31 | 1.00000 | 2.21064e-31 | 1.00000 |
| rad52     | 2.74497e-32 | 1.00000 | 2.74497e-32 | 1.00000 |
| rad62     | 1.91762e-32 | 1.00000 | 1.91762e-32 | 1.00000 |
| rad51     | 1.36240e-32 | 1.00000 | 1.36240e-32 | 1.00000 |
| rad61     | 1.10806e-32 | 1.00000 | 1.10806e-32 | 1.00000 |
| rad47     | 7.91047e-33 | 1.00000 | 7.91047e-33 | 1.00000 |
| rad53     | 1.03689e-34 | 1.00000 | 1.03689e-34 | 1.00000 |
| rad68syn  | 9.15144e-35 | 1.00000 | 9.15144e-35 | 1.00000 |
| rad68anti | 6.69903e-35 | 1.00000 | 6.69903e-35 | 1.00000 |
| rad42     | 3.09565e-35 | 1.00000 | 3.09565e-35 | 1.00000 |
| rad56     | 1.33446e-36 | 1.00000 | 1.33446e-36 | 1.00000 |
| rad40syn  | 1.26231e-36 | 1.00000 | 1.26231e-36 | 1.00000 |
| rad40anti | 8.42812e-37 | 1.00000 | 8.42812e-37 | 1.00000 |
| PAH8+H    | 4.17464e-37 | 1.00000 | 4.17464e-37 | 1.00000 |
| rad65     | 3.34887e-37 | 1.00000 | 3.34887e-37 | 1.00000 |
| rad64     | 2.23983e-39 | 1.00000 | 2.23983e-39 | 1.00000 |
| rad73     | 4.65558e-41 | 1.00000 | 4.65558e-41 | 1.00000 |
| rad71     | 6.92992e-43 | 1.00000 | 6.92992e-43 | 1.00000 |

10000000. Pa, 230.00000 K

=====

| Rate constant             | True (fraction)        | Effective (fraction)   |
|---------------------------|------------------------|------------------------|
| Total                     | 2.20761e-14 (1.00 )    | 2.20761e-14 (1.00 )    |
| Formation of rad19        | 2.20710e-14 (1.000 )   | 2.20710e-14 (1.000 )   |
| H-abstraction to cyc2enyl | 5.13155e-18 (0.000232) | 5.13155e-18 (0.000232) |
| H-abstraction to cyclenyl | 3.75316e-21 (1.70e-07) | 3.75316e-21 (1.70e-07) |

| species                       | PYtrue      | Cumul    | PYeffective | Cumul    |
|-------------------------------|-------------|----------|-------------|----------|
| rad19anti                     | 0.960752    | 0.960752 | 0.960752    | 0.960752 |
| rad9                          | 0.0372608   | 0.998013 | 0.0372608   | 0.998013 |
| rad8                          | 0.00175228  | 0.999766 | 0.00175228  | 0.999766 |
| Benzene+cycloprop-2-enylidene | 0.000232448 | 0.999998 | 0.000232448 | 0.999998 |
| rad12                         | 7.86009e-07 | 0.999999 | 7.86009e-07 | 0.999999 |
| rad15                         | 7.19631e-07 | 1.000000 | 7.19631e-07 | 1.000000 |
| Benzene+cycloprop-1-enylidene | 1.70010e-07 | 1.000000 | 1.70010e-07 | 1.000000 |
| rad19syn                      | 2.24439e-09 | 1.000000 | 2.24439e-09 | 1.000000 |
| rad7                          | 2.75842e-10 | 1.000000 | 2.75842e-10 | 1.000000 |
| Indene+H                      | 2.64359e-10 | 1.000000 | 2.64359e-10 | 1.000000 |
| PhCHCCH2+H                    | 1.23978e-11 | 1.000000 | 1.23978e-11 | 1.000000 |
| PhcycC3H3_A+H                 | 7.73002e-13 | 1.000000 | 7.73002e-13 | 1.000000 |
| rad11                         | 6.27365e-13 | 1.000000 | 6.27365e-13 | 1.000000 |
| rad2                          | 4.86021e-13 | 1.000000 | 4.86021e-13 | 1.000000 |
| Phenyl+cycC3H4                | 4.80590e-13 | 1.000000 | 0.000000    | 1.000000 |
| rad6                          | 2.59271e-13 | 1.000000 | 2.59271e-13 | 1.000000 |
| rad1                          | 1.16886e-13 | 1.000000 | 1.16886e-13 | 1.000000 |
| rad21                         | 4.89676e-14 | 1.000000 | 4.89676e-14 | 1.000000 |
| rad5                          | 4.43507e-14 | 1.000000 | 4.43507e-14 | 1.000000 |
| PhcycC3H3_B+H                 | 1.29070e-14 | 1.000000 | 1.29070e-14 | 1.000000 |
| rad26                         | 1.10159e-14 | 1.000000 | 1.10159e-14 | 1.000000 |
| rad20                         | 6.51331e-15 | 1.000000 | 6.51331e-15 | 1.000000 |
| rad18                         | 3.79417e-15 | 1.000000 | 3.79417e-15 | 1.000000 |
| rad22                         | 3.98828e-16 | 1.000000 | 3.98828e-16 | 1.000000 |
| rad24                         | 7.84841e-17 | 1.000000 | 7.84841e-17 | 1.000000 |
| rad67                         | 7.42536e-17 | 1.000000 | 7.42536e-17 | 1.000000 |
| rad45                         | 3.58869e-17 | 1.000000 | 3.58869e-17 | 1.000000 |
| rad35                         | 3.23615e-17 | 1.000000 | 3.23615e-17 | 1.000000 |
| C2H2+PhCH2                    | 1.44726e-17 | 1.000000 | 1.44726e-17 | 1.000000 |
| rad10                         | 7.54700e-18 | 1.000000 | 7.54700e-18 | 1.000000 |
| rad36                         | 6.42341e-18 | 1.000000 | 6.42341e-18 | 1.000000 |
| PhCCH+CH3                     | 2.94433e-18 | 1.000000 | 2.94433e-18 | 1.000000 |

|            |             |          |             |          |
|------------|-------------|----------|-------------|----------|
| rad3       | 1.93752e-18 | 1.000000 | 1.93752e-18 | 1.000000 |
| rad4       | 1.49220e-18 | 1.000000 | 1.49220e-18 | 1.000000 |
| Ph+MeAc    | 1.30830e-18 | 1.000000 | 1.30830e-18 | 1.000000 |
| PhCCCH3+H  | 1.25944e-18 | 1.000000 | 1.25944e-18 | 1.000000 |
| rad13      | 6.44379e-19 | 1.000000 | 6.44379e-19 | 1.000000 |
| Ph+Allene  | 3.18997e-19 | 1.000000 | 3.18997e-19 | 1.000000 |
| rad25      | 2.71474e-19 | 1.000000 | 2.71474e-19 | 1.000000 |
| rad27      | 1.23535e-19 | 1.000000 | 1.23535e-19 | 1.000000 |
| PhCH2CCH+H | 7.13457e-20 | 1.000000 | 7.13457e-20 | 1.000000 |
| rad23      | 1.76367e-20 | 1.000000 | 1.76367e-20 | 1.000000 |
| rad33      | 1.54761e-20 | 1.000000 | 1.54761e-20 | 1.000000 |
| rad31      | 1.42096e-20 | 1.000000 | 1.42096e-20 | 1.000000 |
| rad30      | 1.83613e-21 | 1.000000 | 1.83613e-21 | 1.000000 |
| rad37      | 7.65139e-23 | 1.000000 | 7.65139e-23 | 1.000000 |
| rad28      | 4.31262e-23 | 1.000000 | 4.31262e-23 | 1.000000 |
| rad60syn   | 9.15756e-24 | 1.000000 | 9.15756e-24 | 1.000000 |
| PAH3+H     | 5.44428e-24 | 1.000000 | 5.44428e-24 | 1.000000 |
| rad60anti  | 4.56907e-24 | 1.000000 | 4.56907e-24 | 1.000000 |
| rad14      | 3.71197e-24 | 1.000000 | 3.71197e-24 | 1.000000 |
| PAH7+H     | 2.76879e-24 | 1.000000 | 2.76879e-24 | 1.000000 |
| rad59      | 1.04511e-24 | 1.000000 | 1.04511e-24 | 1.000000 |
| rad38      | 4.33363e-25 | 1.000000 | 4.33363e-25 | 1.000000 |
| PAH10+CH3  | 3.95477e-25 | 1.000000 | 3.95477e-25 | 1.000000 |
| rad43      | 1.95469e-27 | 1.000000 | 1.95469e-27 | 1.000000 |
| rad46      | 9.90661e-28 | 1.000000 | 9.90661e-28 | 1.000000 |
| rad58      | 4.78840e-28 | 1.000000 | 4.78840e-28 | 1.000000 |
| rad70      | 3.54572e-28 | 1.000000 | 3.54572e-28 | 1.000000 |
| PAH1+H     | 1.73373e-28 | 1.000000 | 1.73373e-28 | 1.000000 |
| rad54      | 3.19113e-29 | 1.000000 | 3.19113e-29 | 1.000000 |
| rad34      | 1.38545e-29 | 1.000000 | 1.38545e-29 | 1.000000 |
| rad50      | 1.24079e-29 | 1.000000 | 1.24079e-29 | 1.000000 |
| PAH9+H     | 1.16686e-29 | 1.000000 | 1.16686e-29 | 1.000000 |
| rad39      | 2.38831e-30 | 1.000000 | 2.38831e-30 | 1.000000 |
| rad41      | 1.23916e-30 | 1.000000 | 1.23916e-30 | 1.000000 |
| rad55      | 5.01569e-31 | 1.000000 | 5.01569e-31 | 1.000000 |
| rad52      | 8.32592e-32 | 1.000000 | 8.32592e-32 | 1.000000 |
| rad62      | 6.62880e-32 | 1.000000 | 6.62880e-32 | 1.000000 |
| rad61      | 4.85455e-32 | 1.000000 | 4.85455e-32 | 1.000000 |
| rad51      | 4.53779e-32 | 1.000000 | 4.53779e-32 | 1.000000 |
| rad47      | 2.96560e-32 | 1.000000 | 2.96560e-32 | 1.000000 |
| rad68syn   | 4.41943e-34 | 1.000000 | 4.41943e-34 | 1.000000 |
| rad68anti  | 3.21987e-34 | 1.000000 | 3.21987e-34 | 1.000000 |
| rad53      | 3.12259e-34 | 1.000000 | 3.12259e-34 | 1.000000 |
| rad42      | 1.31005e-34 | 1.000000 | 1.31005e-34 | 1.000000 |
| rad40syn   | 7.14672e-36 | 1.000000 | 7.14672e-36 | 1.000000 |
| rad56      | 5.00429e-36 | 1.000000 | 5.00429e-36 | 1.000000 |
| rad40anti  | 4.79412e-36 | 1.000000 | 4.79412e-36 | 1.000000 |
| PAH8+H     | 2.52103e-36 | 1.000000 | 2.52103e-36 | 1.000000 |
| rad65      | 1.23256e-36 | 1.000000 | 1.23256e-36 | 1.000000 |
| rad64      | 1.11456e-38 | 1.000000 | 1.11456e-38 | 1.000000 |
| rad73      | 3.02963e-40 | 1.000000 | 3.02963e-40 | 1.000000 |
| rad71      | 4.90741e-42 | 1.000000 | 4.90741e-42 | 1.000000 |

100000000. Pa, 240.000000 K

| Rate constant             | True (fraction)        | Effective (fraction)   |
|---------------------------|------------------------|------------------------|
| Total                     | 2.45462e-14 (1.00)     | 2.45462e-14 (1.00)     |
| Formation of rad19        | 2.45383e-14 (1.000)    | 2.45383e-14 (1.000)    |
| H-abstraction to cyc2enyl | 7.92234e-18 (0.000323) | 7.92234e-18 (0.000323) |
| H-abstraction to cyc1enyl | 7.97958e-21 (3.25e-07) | 7.97958e-21 (3.25e-07) |

| species                       | PYtrue      | Cumul    | PYeffective | Cumul    |
|-------------------------------|-------------|----------|-------------|----------|
| rad19anti                     | 0.958033    | 0.958033 | 0.958033    | 0.958033 |
| rad9                          | 0.0399076   | 0.997941 | 0.0399076   | 0.997941 |
| rad8                          | 0.00173391  | 0.999675 | 0.00173391  | 0.999675 |
| Benzene+cycloprop-2-enylidene | 0.000322752 | 0.999998 | 0.000322752 | 0.999998 |
| rad12                         | 8.94937e-07 | 0.999999 | 8.94937e-07 | 0.999999 |
| rad15                         | 8.42436e-07 | 0.999999 | 8.42436e-07 | 0.999999 |
| Benzene+cycloprop-1-enylidene | 3.25084e-07 | 1.000000 | 3.25084e-07 | 1.000000 |
| rad19syn                      | 1.92079e-09 | 1.000000 | 1.92079e-09 | 1.000000 |
| Indene+H                      | 3.41978e-10 | 1.000000 | 3.41978e-10 | 1.000000 |
| rad7                          | 3.16252e-10 | 1.000000 | 3.16252e-10 | 1.000000 |
| PhCHCCH2+H                    | 1.62436e-11 | 1.000000 | 1.62436e-11 | 1.000000 |
| PhcycC3H3_A+H                 | 1.27335e-12 | 1.000000 | 1.27335e-12 | 1.000000 |
| rad11                         | 8.33133e-13 | 1.000000 | 8.33133e-13 | 1.000000 |
| Phenyl+cycC3H4                | 7.21209e-13 | 1.000000 | 0.00000     | 1.000000 |
| rad2                          | 6.40914e-13 | 1.000000 | 6.40914e-13 | 1.000000 |
| rad6                          | 3.27092e-13 | 1.000000 | 3.27092e-13 | 1.000000 |

|               |             |          |             |          |
|---------------|-------------|----------|-------------|----------|
| rad1          | 1.52955e-13 | 1.000000 | 1.52955e-13 | 1.000000 |
| rad21         | 6.74570e-14 | 1.000000 | 6.74570e-14 | 1.000000 |
| rad5          | 5.31549e-14 | 1.000000 | 5.31549e-14 | 1.000000 |
| PhcycC3H3_B+H | 2.70028e-14 | 1.000000 | 2.70028e-14 | 1.000000 |
| rad26         | 1.56414e-14 | 1.000000 | 1.56414e-14 | 1.000000 |
| rad20         | 8.18441e-15 | 1.000000 | 8.18441e-15 | 1.000000 |
| rad18         | 5.37472e-15 | 1.000000 | 5.37472e-15 | 1.000000 |
| rad22         | 6.04984e-16 | 1.000000 | 6.04984e-16 | 1.000000 |
| rad24         | 1.16894e-16 | 1.000000 | 1.16894e-16 | 1.000000 |
| rad67         | 1.14422e-16 | 1.000000 | 1.14422e-16 | 1.000000 |
| rad45         | 5.90207e-17 | 1.000000 | 5.90207e-17 | 1.000000 |
| rad35         | 4.95177e-17 | 1.000000 | 4.95177e-17 | 1.000000 |
| C2H2+PhCH2    | 2.03498e-17 | 1.000000 | 2.03498e-17 | 1.000000 |
| rad10         | 1.16957e-17 | 1.000000 | 1.16957e-17 | 1.000000 |
| rad36         | 1.04845e-17 | 1.000000 | 1.04845e-17 | 1.000000 |
| PhCCH+CH3     | 4.10267e-18 | 1.000000 | 4.10267e-18 | 1.000000 |
| rad3          | 3.05298e-18 | 1.000000 | 3.05298e-18 | 1.000000 |
| rad4          | 2.34595e-18 | 1.000000 | 2.34595e-18 | 1.000000 |
| Ph+MeAc       | 2.26277e-18 | 1.000000 | 2.26277e-18 | 1.000000 |
| PhCCCH3+H     | 2.10327e-18 | 1.000000 | 2.10327e-18 | 1.000000 |
| rad13         | 9.21089e-19 | 1.000000 | 9.21089e-19 | 1.000000 |
| Ph+Allene     | 5.60905e-19 | 1.000000 | 5.60905e-19 | 1.000000 |
| rad25         | 4.37715e-19 | 1.000000 | 4.37715e-19 | 1.000000 |
| rad27         | 1.99534e-19 | 1.000000 | 1.99534e-19 | 1.000000 |
| PhCH2CCH+H    | 1.32034e-19 | 1.000000 | 1.32034e-19 | 1.000000 |
| rad23         | 3.15902e-20 | 1.000000 | 3.15902e-20 | 1.000000 |
| rad33         | 2.24134e-20 | 1.000000 | 2.24134e-20 | 1.000000 |
| rad31         | 1.81893e-20 | 1.000000 | 1.81893e-20 | 1.000000 |
| rad30         | 3.24261e-21 | 1.000000 | 3.24261e-21 | 1.000000 |
| rad37         | 1.50488e-22 | 1.000000 | 1.50488e-22 | 1.000000 |
| rad28         | 8.46547e-23 | 1.000000 | 8.46547e-23 | 1.000000 |
| rad60syn      | 1.76517e-23 | 1.000000 | 1.76517e-23 | 1.000000 |
| PAH3+H        | 1.16347e-23 | 1.000000 | 1.16347e-23 | 1.000000 |
| rad60anti     | 8.87394e-24 | 1.000000 | 8.87394e-24 | 1.000000 |
| rad14         | 7.56479e-24 | 1.000000 | 7.56479e-24 | 1.000000 |
| PAH7+H        | 6.06545e-24 | 1.000000 | 6.06545e-24 | 1.000000 |
| rad59         | 2.19624e-24 | 1.000000 | 2.19624e-24 | 1.000000 |
| PAH10+CH3     | 9.86886e-25 | 1.000000 | 9.86886e-25 | 1.000000 |
| rad38         | 9.71502e-25 | 1.000000 | 9.71502e-25 | 1.000000 |
| rad43         | 5.25164e-27 | 1.000000 | 5.25164e-27 | 1.000000 |
| rad46         | 2.34225e-27 | 1.000000 | 2.34225e-27 | 1.000000 |
| rad58         | 1.31170e-27 | 1.000000 | 1.31170e-27 | 1.000000 |
| rad70         | 1.02085e-27 | 1.000000 | 1.02085e-27 | 1.000000 |
| PAH1+H        | 5.15685e-28 | 1.000000 | 5.15685e-28 | 1.000000 |
| rad54         | 6.79849e-29 | 1.000000 | 6.79849e-29 | 1.000000 |
| rad34         | 4.36652e-29 | 1.000000 | 4.36652e-29 | 1.000000 |
| rad50         | 3.43871e-29 | 1.000000 | 3.43871e-29 | 1.000000 |
| PAH9+H        | 2.98141e-29 | 1.000000 | 2.98141e-29 | 1.000000 |
| rad39         | 6.98415e-30 | 1.000000 | 6.98415e-30 | 1.000000 |
| rad41         | 4.25762e-30 | 1.000000 | 4.25762e-30 | 1.000000 |
| rad55         | 1.14276e-30 | 1.000000 | 1.14276e-30 | 1.000000 |
| rad52         | 2.63229e-31 | 1.000000 | 2.63229e-31 | 1.000000 |
| rad62         | 2.36263e-31 | 1.000000 | 2.36263e-31 | 1.000000 |
| rad61         | 2.02433e-31 | 1.000000 | 2.02433e-31 | 1.000000 |
| rad51         | 1.55867e-31 | 1.000000 | 1.55867e-31 | 1.000000 |
| rad47         | 1.11671e-31 | 1.000000 | 1.11671e-31 | 1.000000 |
| rad68syn      | 1.98745e-33 | 1.000000 | 1.98745e-33 | 1.000000 |
| rad68anti     | 1.44286e-33 | 1.000000 | 1.44286e-33 | 1.000000 |
| rad53         | 9.15395e-34 | 1.000000 | 9.15395e-34 | 1.000000 |
| rad42         | 5.48976e-34 | 1.000000 | 5.48976e-34 | 1.000000 |
| rad40syn      | 3.64009e-35 | 1.000000 | 3.64009e-35 | 1.000000 |
| rad40anti     | 2.45602e-35 | 1.000000 | 2.45602e-35 | 1.000000 |
| rad56         | 1.75972e-35 | 1.000000 | 1.75972e-35 | 1.000000 |
| PAH8+H        | 1.34751e-35 | 1.000000 | 1.34751e-35 | 1.000000 |
| rad65         | 4.59934e-36 | 1.000000 | 4.59934e-36 | 1.000000 |
| rad64         | 5.19810e-38 | 1.000000 | 5.19810e-38 | 1.000000 |
| rad73         | 1.76320e-39 | 1.000000 | 1.76320e-39 | 1.000000 |
| rad71         | 3.05600e-41 | 1.000000 | 3.05600e-41 | 1.000000 |

100000000. Pa, 250.000000 K

| Rate constant             | True (fraction)        | Effective (fraction)   |
|---------------------------|------------------------|------------------------|
| Total                     | 2.71048e-14 (1.00 )    | 2.71048e-14 (1.00 )    |
| Formation of rad19        | 2.70930e-14 (1.000 )   | 2.70930e-14 (1.000 )   |
| H-abstraction to cyc2enyl | 1.17991e-17 (0.000435) | 1.17991e-17 (0.000435) |
| H-abstraction to cyclenyl | 1.59554e-20 (5.89e-07) | 1.59554e-20 (5.89e-07) |

  

| species | PYtrue | Cumul | PYeffective | Cumul |
|---------|--------|-------|-------------|-------|
| -----   | -----  | ----- | -----       | ----- |

|                               |             |          |             |          |
|-------------------------------|-------------|----------|-------------|----------|
| rad19anti                     | 0.955088    | 0.955088 | 0.955088    | 0.955088 |
| rad9                          | 0.0427580   | 0.997846 | 0.0427580   | 0.997846 |
| rad8                          | 0.00171556  | 0.999562 | 0.00171556  | 0.999562 |
| Benzene+cycloprop-2-enylidene | 0.000435312 | 0.999997 | 0.000435312 | 0.999997 |
| rad12                         | 1.02029e-06 | 0.999998 | 1.02029e-06 | 0.999998 |
| rad15                         | 9.89190e-07 | 0.999999 | 9.89190e-07 | 0.999999 |
| Benzene+cycloprop-1-enylidene | 5.88656e-07 | 1.000000 | 5.88656e-07 | 1.000000 |
| rad19syn                      | 1.73461e-09 | 1.000000 | 1.73461e-09 | 1.000000 |
| Indene+H                      | 4.45808e-10 | 1.000000 | 4.45808e-10 | 1.000000 |
| rad7                          | 3.64021e-10 | 1.000000 | 3.64021e-10 | 1.000000 |
| PhCHCCH2+H                    | 2.15805e-11 | 1.000000 | 2.15805e-11 | 1.000000 |
| PhcycC3H3_A+H                 | 2.14214e-12 | 1.000000 | 2.14214e-12 | 1.000000 |
| rad11                         | 1.12257e-12 | 1.000000 | 1.12257e-12 | 1.000000 |
| Phenyl+cycC3H4                | 1.07825e-12 | 1.000000 | 0.000000    | 1.000000 |
| rad2                          | 8.58000e-13 | 1.000000 | 8.58000e-13 | 1.000000 |
| rad6                          | 4.14779e-13 | 1.000000 | 4.14779e-13 | 1.000000 |
| rad1                          | 2.03324e-13 | 1.000000 | 2.03324e-13 | 1.000000 |
| rad21                         | 9.46229e-14 | 1.000000 | 9.46229e-14 | 1.000000 |
| rad5                          | 6.39878e-14 | 1.000000 | 6.39878e-14 | 1.000000 |
| PhcycC3H3_B+H                 | 5.70533e-14 | 1.000000 | 5.70533e-14 | 1.000000 |
| rad26                         | 2.25693e-14 | 1.000000 | 2.25693e-14 | 1.000000 |
| rad20                         | 1.04626e-14 | 1.000000 | 1.04626e-14 | 1.000000 |
| rad18                         | 7.74437e-15 | 1.000000 | 7.74437e-15 | 1.000000 |
| rad22                         | 9.39714e-16 | 1.000000 | 9.39714e-16 | 1.000000 |
| rad67                         | 1.80804e-16 | 1.000000 | 1.80804e-16 | 1.000000 |
| rad24                         | 1.77802e-16 | 1.000000 | 1.77802e-16 | 1.000000 |
| rad45                         | 9.97048e-17 | 1.000000 | 9.97048e-17 | 1.000000 |
| rad35                         | 7.76533e-17 | 1.000000 | 7.76533e-17 | 1.000000 |
| C2H2+PhCH2                    | 2.92031e-17 | 1.000000 | 2.92031e-17 | 1.000000 |
| rad10                         | 1.86532e-17 | 1.000000 | 1.86532e-17 | 1.000000 |
| rad36                         | 1.75874e-17 | 1.000000 | 1.75874e-17 | 1.000000 |
| PhCCH+CH3                     | 5.76662e-18 | 1.000000 | 5.76662e-18 | 1.000000 |
| rad3                          | 4.95772e-18 | 1.000000 | 4.95772e-18 | 1.000000 |
| Ph+MeAc                       | 4.06552e-18 | 1.000000 | 4.06552e-18 | 1.000000 |
| rad4                          | 3.80160e-18 | 1.000000 | 3.80160e-18 | 1.000000 |
| PhCCCH3+H                     | 3.64224e-18 | 1.000000 | 3.64224e-18 | 1.000000 |
| rad13                         | 1.32649e-18 | 1.000000 | 1.32649e-18 | 1.000000 |
| Ph+Allene                     | 1.02393e-18 | 1.000000 | 1.02393e-18 | 1.000000 |
| rad25                         | 7.27518e-19 | 1.000000 | 7.27518e-19 | 1.000000 |
| rad27                         | 3.33121e-19 | 1.000000 | 3.33121e-19 | 1.000000 |
| PhCH2CCH+H                    | 2.54424e-19 | 1.000000 | 2.54424e-19 | 1.000000 |
| rad23                         | 5.87020e-20 | 1.000000 | 5.87020e-20 | 1.000000 |
| rad33                         | 3.27103e-20 | 1.000000 | 3.27103e-20 | 1.000000 |
| rad31                         | 2.38534e-20 | 1.000000 | 2.38534e-20 | 1.000000 |
| rad30                         | 5.93875e-21 | 1.000000 | 5.93875e-21 | 1.000000 |
| rad37                         | 3.08261e-22 | 1.000000 | 3.08261e-22 | 1.000000 |
| rad28                         | 1.73357e-22 | 1.000000 | 1.73357e-22 | 1.000000 |
| rad60syn                      | 3.55054e-23 | 1.000000 | 3.55054e-23 | 1.000000 |
| PAH3+H                        | 2.60189e-23 | 1.000000 | 2.60189e-23 | 1.000000 |
| rad60anti                     | 1.79913e-23 | 1.000000 | 1.79913e-23 | 1.000000 |
| rad14                         | 1.61808e-23 | 1.000000 | 1.61808e-23 | 1.000000 |
| PAH7+H                        | 1.38892e-23 | 1.000000 | 1.38892e-23 | 1.000000 |
| rad59                         | 4.82740e-24 | 1.000000 | 4.82740e-24 | 1.000000 |
| PAH10+CH3                     | 2.55173e-24 | 1.000000 | 2.55173e-24 | 1.000000 |
| rad38                         | 2.27026e-24 | 1.000000 | 2.27026e-24 | 1.000000 |
| rad43                         | 1.46475e-26 | 1.000000 | 1.46475e-26 | 1.000000 |
| rad46                         | 5.80127e-27 | 1.000000 | 5.80127e-27 | 1.000000 |
| rad58                         | 3.69018e-27 | 1.000000 | 3.69018e-27 | 1.000000 |
| rad70                         | 3.00122e-27 | 1.000000 | 3.00122e-27 | 1.000000 |
| PAH1+H                        | 1.55342e-27 | 1.000000 | 1.55342e-27 | 1.000000 |
| rad54                         | 1.45482e-28 | 1.000000 | 1.45482e-28 | 1.000000 |
| rad34                         | 1.38309e-28 | 1.000000 | 1.38309e-28 | 1.000000 |
| rad50                         | 9.88519e-29 | 1.000000 | 9.88519e-29 | 1.000000 |
| PAH9+H                        | 7.98613e-29 | 1.000000 | 7.98613e-29 | 1.000000 |
| rad39                         | 2.10479e-29 | 1.000000 | 2.10479e-29 | 1.000000 |
| rad41                         | 1.45535e-29 | 1.000000 | 1.45535e-29 | 1.000000 |
| rad55                         | 2.60132e-30 | 1.000000 | 2.60132e-30 | 1.000000 |
| rad52                         | 8.50078e-31 | 1.000000 | 8.50078e-31 | 1.000000 |
| rad62                         | 8.44833e-31 | 1.000000 | 8.44833e-31 | 1.000000 |
| rad61                         | 7.92472e-31 | 1.000000 | 7.92472e-31 | 1.000000 |
| rad51                         | 5.39195e-31 | 1.000000 | 5.39195e-31 | 1.000000 |
| rad47                         | 4.12179e-31 | 1.000000 | 4.12179e-31 | 1.000000 |
| rad68syn                      | 8.24088e-33 | 1.000000 | 8.24088e-33 | 1.000000 |
| rad68anti                     | 5.96697e-33 | 1.000000 | 5.96697e-33 | 1.000000 |
| rad53                         | 2.59724e-33 | 1.000000 | 2.59724e-33 | 1.000000 |
| rad42                         | 2.22084e-33 | 1.000000 | 2.22084e-33 | 1.000000 |
| rad40syn                      | 1.66637e-34 | 1.000000 | 1.66637e-34 | 1.000000 |
| rad40anti                     | 1.13178e-34 | 1.000000 | 1.13178e-34 | 1.000000 |
| PAH8+H                        | 6.39565e-35 | 1.000000 | 6.39565e-35 | 1.000000 |
| rad56                         | 5.79380e-35 | 1.000000 | 5.79380e-35 | 1.000000 |

|       |             |          |             |          |
|-------|-------------|----------|-------------|----------|
| rad65 | 1.68993e-35 | 1.000000 | 1.68993e-35 | 1.000000 |
| rad64 | 2.24044e-37 | 1.000000 | 2.24044e-37 | 1.000000 |
| rad73 | 9.18499e-39 | 1.000000 | 9.18499e-39 | 1.000000 |
| rad71 | 1.68273e-40 | 1.000000 | 1.68273e-40 | 1.000000 |

100000000. Pa, 260.000000 K

=====

| Rate constant             | True (fraction)        | Effective (fraction)   |
|---------------------------|------------------------|------------------------|
| Total                     | 2.97464e-14 (1.00 )    | 2.97464e-14 (1.00 )    |
| Formation of rad19        | 2.97293e-14 (0.999 )   | 2.97293e-14 (0.999 )   |
| H-abstraction to cyc2enyl | 1.70236e-17 (0.000572) | 1.70236e-17 (0.000572) |
| H-abstraction to cyclenyl | 3.02186e-20 (1.02e-06) | 3.02186e-20 (1.02e-06) |

| species                       | PYtrue      | Cumul    | PYeffective | Cumul    |
|-------------------------------|-------------|----------|-------------|----------|
| rad19anti                     | 0.951882    | 0.951882 | 0.951882    | 0.951882 |
| rad9                          | 0.0458450   | 0.997727 | 0.0458450   | 0.997727 |
| rad8                          | 0.00169720  | 0.999424 | 0.00169720  | 0.999424 |
| Benzene+cycloprop-2-enylidene | 0.000572291 | 0.999996 | 0.000572291 | 0.999996 |
| rad15                         | 1.16629e-06 | 0.999998 | 1.16629e-06 | 0.999998 |
| rad12                         | 1.16555e-06 | 0.999999 | 1.16555e-06 | 0.999999 |
| Benzene+cycloprop-1-enylidene | 1.01588e-06 | 1.000000 | 1.01588e-06 | 1.000000 |
| rad19syn                      | 1.65268e-09 | 1.000000 | 1.65268e-09 | 1.000000 |
| Indene+H                      | 5.86951e-10 | 1.000000 | 5.86951e-10 | 1.000000 |
| rad7                          | 4.20605e-10 | 1.000000 | 4.20605e-10 | 1.000000 |
| PhCHCCH2+H                    | 2.91476e-11 | 1.000000 | 2.91476e-11 | 1.000000 |
| PhcycC3H3_A+H                 | 3.68216e-12 | 1.000000 | 3.68216e-12 | 1.000000 |
| Phenyl+cycC3H4                | 1.60555e-12 | 1.000000 | 0.000000    | 1.000000 |
| rad11                         | 1.53874e-12 | 1.000000 | 1.53874e-12 | 1.000000 |
| rad2                          | 1.16919e-12 | 1.000000 | 1.16919e-12 | 1.000000 |
| rad6                          | 5.28604e-13 | 1.000000 | 5.28604e-13 | 1.000000 |
| rad1                          | 2.75302e-13 | 1.000000 | 2.75302e-13 | 1.000000 |
| rad21                         | 1.35532e-13 | 1.000000 | 1.35532e-13 | 1.000000 |
| PhcycC3H3_B+H                 | 1.21335e-13 | 1.000000 | 1.21335e-13 | 1.000000 |
| rad5                          | 7.73791e-14 | 1.000000 | 7.73791e-14 | 1.000000 |
| rad26                         | 3.31922e-14 | 1.000000 | 3.31922e-14 | 1.000000 |
| rad20                         | 1.36737e-14 | 1.000000 | 1.36737e-14 | 1.000000 |
| rad18                         | 1.13886e-14 | 1.000000 | 1.13886e-14 | 1.000000 |
| rad22                         | 1.49974e-15 | 1.000000 | 1.49974e-15 | 1.000000 |
| rad67                         | 2.93968e-16 | 1.000000 | 2.93968e-16 | 1.000000 |
| rad24                         | 2.76974e-16 | 1.000000 | 2.76974e-16 | 1.000000 |
| rad45                         | 1.73515e-16 | 1.000000 | 1.73515e-16 | 1.000000 |
| rad35                         | 1.25240e-16 | 1.000000 | 1.25240e-16 | 1.000000 |
| C2H2+PhCH2                    | 4.30446e-17 | 1.000000 | 4.30446e-17 | 1.000000 |
| rad10                         | 3.07327e-17 | 1.000000 | 3.07327e-17 | 1.000000 |
| rad36                         | 3.04085e-17 | 1.000000 | 3.04085e-17 | 1.000000 |
| rad3                          | 8.32731e-18 | 1.000000 | 8.32731e-18 | 1.000000 |
| PhCCH+CH3                     | 8.17652e-18 | 1.000000 | 8.17652e-18 | 1.000000 |
| Ph+MeAc                       | 7.59593e-18 | 1.000000 | 7.59593e-18 | 1.000000 |
| PhCCH3+H                      | 6.55570e-18 | 1.000000 | 6.55570e-18 | 1.000000 |
| rad4                          | 6.37317e-18 | 1.000000 | 6.37317e-18 | 1.000000 |
| Ph+Allene                     | 1.94156e-18 | 1.000000 | 1.94156e-18 | 1.000000 |
| rad13                         | 1.92394e-18 | 1.000000 | 1.92394e-18 | 1.000000 |
| rad25                         | 1.25019e-18 | 1.000000 | 1.25019e-18 | 1.000000 |
| rad27                         | 5.76694e-19 | 1.000000 | 5.76694e-19 | 1.000000 |
| PhCH2CCH+H                    | 5.09564e-19 | 1.000000 | 5.09564e-19 | 1.000000 |
| rad23                         | 1.13350e-19 | 1.000000 | 1.13350e-19 | 1.000000 |
| rad33                         | 4.80800e-20 | 1.000000 | 4.80800e-20 | 1.000000 |
| rad31                         | 3.21485e-20 | 1.000000 | 3.21485e-20 | 1.000000 |
| rad30                         | 1.13019e-20 | 1.000000 | 1.13019e-20 | 1.000000 |
| rad37                         | 6.55576e-22 | 1.000000 | 6.55576e-22 | 1.000000 |
| rad28                         | 3.69236e-22 | 1.000000 | 3.69236e-22 | 1.000000 |
| rad60syn                      | 7.43676e-23 | 1.000000 | 7.43676e-23 | 1.000000 |
| PAH3+H                        | 6.03669e-23 | 1.000000 | 6.03669e-23 | 1.000000 |
| rad60anti                     | 3.79800e-23 | 1.000000 | 3.79800e-23 | 1.000000 |
| rad14                         | 3.61575e-23 | 1.000000 | 3.61575e-23 | 1.000000 |
| PAH7+H                        | 3.29050e-23 | 1.000000 | 3.29050e-23 | 1.000000 |
| rad59                         | 1.10166e-23 | 1.000000 | 1.10166e-23 | 1.000000 |
| PAH10+CH3                     | 6.72112e-24 | 1.000000 | 6.72112e-24 | 1.000000 |
| rad38                         | 5.47032e-24 | 1.000000 | 5.47032e-24 | 1.000000 |
| rad43                         | 4.14778e-26 | 1.000000 | 4.14778e-26 | 1.000000 |
| rad46                         | 1.48547e-26 | 1.000000 | 1.48547e-26 | 1.000000 |
| rad58                         | 1.04386e-26 | 1.000000 | 1.04386e-26 | 1.000000 |
| rad70                         | 8.80355e-27 | 1.000000 | 8.80355e-27 | 1.000000 |
| PAH1+H                        | 4.63611e-27 | 1.000000 | 4.63611e-27 | 1.000000 |
| rad34                         | 4.29990e-28 | 1.000000 | 4.29990e-28 | 1.000000 |
| rad54                         | 3.11111e-28 | 1.000000 | 3.11111e-28 | 1.000000 |
| rad50                         | 2.88209e-28 | 1.000000 | 2.88209e-28 | 1.000000 |
| PAH9+H                        | 2.19798e-28 | 1.000000 | 2.19798e-28 | 1.000000 |



|           |             |          |             |          |
|-----------|-------------|----------|-------------|----------|
| rad39     | 6.36837e-29 | 1.000000 | 6.36837e-29 | 1.000000 |
| rad41     | 4.83243e-29 | 1.000000 | 4.83243e-29 | 1.000000 |
| rad55     | 5.88163e-30 | 1.000000 | 5.88163e-30 | 1.000000 |
| rad62     | 2.94969e-30 | 1.000000 | 2.94969e-30 | 1.000000 |
| rad61     | 2.88082e-30 | 1.000000 | 2.88082e-30 | 1.000000 |
| rad52     | 2.73496e-30 | 1.000000 | 2.73496e-30 | 1.000000 |
| rad51     | 1.83172e-30 | 1.000000 | 1.83172e-30 | 1.000000 |
| rad47     | 1.45925e-30 | 1.000000 | 1.45925e-30 | 1.000000 |
| rad68syn  | 3.12881e-32 | 1.000000 | 3.12881e-32 | 1.000000 |
| rad68anti | 2.26100e-32 | 1.000000 | 2.26100e-32 | 1.000000 |
| rad42     | 8.49964e-33 | 1.000000 | 8.49964e-33 | 1.000000 |
| rad53     | 7.09374e-33 | 1.000000 | 7.09374e-33 | 1.000000 |
| rad40syn  | 6.85793e-34 | 1.000000 | 6.85793e-34 | 1.000000 |
| rad40anti | 4.69147e-34 | 1.000000 | 4.69147e-34 | 1.000000 |
| PAH8+H    | 2.70457e-34 | 1.000000 | 2.70457e-34 | 1.000000 |
| rad56     | 1.78517e-34 | 1.000000 | 1.78517e-34 | 1.000000 |
| rad65     | 5.96068e-35 | 1.000000 | 5.96068e-35 | 1.000000 |
| rad64     | 8.84370e-37 | 1.000000 | 8.84370e-37 | 1.000000 |
| rad73     | 4.29068e-38 | 1.000000 | 4.29068e-38 | 1.000000 |
| rad71     | 8.23474e-40 | 1.000000 | 8.23474e-40 | 1.000000 |

100000000. Pa, 270.000000 K

| Rate constant             | True (fraction)        | Effective (fraction)   |
|---------------------------|------------------------|------------------------|
| Total                     | 3.24655e-14 (1.00 )    | 3.24655e-14 (1.00 )    |
| Formation of rad19        | 3.24415e-14 (0.999 )   | 3.24415e-14 (0.999 )   |
| H-abstraction to cyc2enyl | 2.38790e-17 (0.000736) | 2.38790e-17 (0.000736) |
| H-abstraction to cyclenyl | 5.45397e-20 (1.68e-06) | 5.45397e-20 (1.68e-06) |

| species                       | PYtrue      | Cumul    | PYeffective | Cumul    |
|-------------------------------|-------------|----------|-------------|----------|
| rad19anti                     | 0.948373    | 0.948373 | 0.948373    | 0.948373 |
| rad9                          | 0.0492083   | 0.997582 | 0.0492083   | 0.997582 |
| rad8                          | 0.00167872  | 0.999260 | 0.00167872  | 0.999260 |
| Benzene+cycloprop-2-enylidene | 0.000735519 | 0.999996 | 0.000735519 | 0.999996 |
| Benzene+cycloprop-1-enylidene | 1.67993e-06 | 0.999998 | 1.67993e-06 | 0.999998 |
| rad15                         | 1.38235e-06 | 0.999999 | 1.38235e-06 | 0.999999 |
| rad12                         | 1.33519e-06 | 1.00000  | 1.33519e-06 | 1.00000  |
| rad19syn                      | 1.66061e-09 | 1.00000  | 1.66061e-09 | 1.00000  |
| Indene+H                      | 7.82276e-10 | 1.00000  | 7.82276e-10 | 1.00000  |
| rad7                          | 4.87737e-10 | 1.00000  | 4.87737e-10 | 1.00000  |
| PhCHCCH2+H                    | 4.01210e-11 | 1.00000  | 4.01210e-11 | 1.00000  |
| PhcycC3H3_A+H                 | 6.45146e-12 | 1.00000  | 6.45146e-12 | 1.00000  |
| Phenyl+cycC3H4                | 2.38025e-12 | 1.00000  | 0.00000     | 1.00000  |
| rad11                         | 2.15083e-12 | 1.00000  | 2.15083e-12 | 1.00000  |
| rad2                          | 1.62587e-12 | 1.00000  | 1.62587e-12 | 1.00000  |
| rad6                          | 6.76886e-13 | 1.00000  | 6.76886e-13 | 1.00000  |
| rad1                          | 3.80642e-13 | 1.00000  | 3.80642e-13 | 1.00000  |
| PhcycC3H3_B+H                 | 2.57689e-13 | 1.00000  | 2.57689e-13 | 1.00000  |
| rad21                         | 1.98663e-13 | 1.00000  | 1.98663e-13 | 1.00000  |
| rad5                          | 9.40077e-14 | 1.00000  | 9.40077e-14 | 1.00000  |
| rad26                         | 4.98727e-14 | 1.00000  | 4.98727e-14 | 1.00000  |
| rad20                         | 1.83756e-14 | 1.00000  | 1.83756e-14 | 1.00000  |
| rad18                         | 1.71399e-14 | 1.00000  | 1.71399e-14 | 1.00000  |
| rad22                         | 2.46298e-15 | 1.00000  | 2.46298e-15 | 1.00000  |
| rad67                         | 4.92388e-16 | 1.00000  | 4.92388e-16 | 1.00000  |
| rad24                         | 4.42389e-16 | 1.00000  | 4.42389e-16 | 1.00000  |
| rad45                         | 3.10975e-16 | 1.00000  | 3.10975e-16 | 1.00000  |
| rad35                         | 2.08031e-16 | 1.00000  | 2.08031e-16 | 1.00000  |
| C2H2+PhCH2                    | 6.56413e-17 | 1.00000  | 6.56413e-17 | 1.00000  |
| rad36                         | 5.41725e-17 | 1.00000  | 5.41725e-17 | 1.00000  |
| rad10                         | 5.23693e-17 | 1.00000  | 5.23693e-17 | 1.00000  |
| Ph+MeAc                       | 1.46878e-17 | 1.00000  | 1.46878e-17 | 1.00000  |
| rad3                          | 1.44759e-17 | 1.00000  | 1.44759e-17 | 1.00000  |
| PhCCCH3+H                     | 1.22321e-17 | 1.00000  | 1.22321e-17 | 1.00000  |
| PhCCH+CH3                     | 1.16943e-17 | 1.00000  | 1.16943e-17 | 1.00000  |
| rad4                          | 1.10596e-17 | 1.00000  | 1.10596e-17 | 1.00000  |
| Ph+Allene                     | 3.80289e-18 | 1.00000  | 3.80289e-18 | 1.00000  |
| rad13                         | 2.80874e-18 | 1.00000  | 2.80874e-18 | 1.00000  |
| rad25                         | 2.21973e-18 | 1.00000  | 2.21973e-18 | 1.00000  |
| PhCH2CCH+H                    | 1.05137e-18 | 1.00000  | 1.05137e-18 | 1.00000  |
| rad27                         | 1.03458e-18 | 1.00000  | 1.03458e-18 | 1.00000  |
| rad23                         | 2.26459e-19 | 1.00000  | 2.26459e-19 | 1.00000  |
| rad33                         | 7.11246e-20 | 1.00000  | 7.11246e-20 | 1.00000  |
| rad31                         | 4.46651e-20 | 1.00000  | 4.46651e-20 | 1.00000  |
| rad30                         | 2.22626e-20 | 1.00000  | 2.22626e-20 | 1.00000  |
| rad37                         | 1.43216e-21 | 1.00000  | 1.43216e-21 | 1.00000  |
| rad28                         | 8.09041e-22 | 1.00000  | 8.09041e-22 | 1.00000  |
| rad60syn                      | 1.60583e-22 | 1.00000  | 1.60583e-22 | 1.00000  |

|           |             |         |             |         |
|-----------|-------------|---------|-------------|---------|
| PAH3+H    | 1.42876e-22 | 1.00000 | 1.42876e-22 | 1.00000 |
| rad14     | 8.32817e-23 | 1.00000 | 8.32817e-23 | 1.00000 |
| rad60anti | 8.26062e-23 | 1.00000 | 8.26062e-23 | 1.00000 |
| PAH7+H    | 7.92047e-23 | 1.00000 | 7.92047e-23 | 1.00000 |
| rad59     | 2.56944e-23 | 1.00000 | 2.56944e-23 | 1.00000 |
| PAH10+CH3 | 1.76469e-23 | 1.00000 | 1.76469e-23 | 1.00000 |
| rad38     | 1.33474e-23 | 1.00000 | 1.33474e-23 | 1.00000 |
| rad43     | 1.16305e-25 | 1.00000 | 1.16305e-25 | 1.00000 |
| rad46     | 3.85199e-26 | 1.00000 | 3.85199e-26 | 1.00000 |
| rad58     | 2.90139e-26 | 1.00000 | 2.90139e-26 | 1.00000 |
| rad70     | 2.51755e-26 | 1.00000 | 2.51755e-26 | 1.00000 |
| PAH1+H    | 1.34178e-26 | 1.00000 | 1.34178e-26 | 1.00000 |
| rad34     | 1.28464e-27 | 1.00000 | 1.28464e-27 | 1.00000 |
| rad50     | 8.31299e-28 | 1.00000 | 8.31299e-28 | 1.00000 |
| rad54     | 6.61041e-28 | 1.00000 | 6.61041e-28 | 1.00000 |
| PAH9+H    | 6.05781e-28 | 1.00000 | 6.05781e-28 | 1.00000 |
| rad39     | 1.88481e-28 | 1.00000 | 1.88481e-28 | 1.00000 |
| rad41     | 1.52847e-28 | 1.00000 | 1.52847e-28 | 1.00000 |
| rad55     | 1.31269e-29 | 1.00000 | 1.31269e-29 | 1.00000 |
| rad62     | 9.83750e-30 | 1.00000 | 9.83750e-30 | 1.00000 |
| rad61     | 9.65228e-30 | 1.00000 | 9.65228e-30 | 1.00000 |
| rad52     | 8.56154e-30 | 1.00000 | 8.56154e-30 | 1.00000 |
| rad51     | 5.98059e-30 | 1.00000 | 5.98059e-30 | 1.00000 |
| rad47     | 4.87552e-30 | 1.00000 | 4.87552e-30 | 1.00000 |
| rad68syn  | 1.08332e-31 | 1.00000 | 1.08332e-31 | 1.00000 |
| rad68anti | 7.81688e-32 | 1.00000 | 7.81688e-32 | 1.00000 |
| rad42     | 3.03495e-32 | 1.00000 | 3.03495e-32 | 1.00000 |
| rad53     | 1.85688e-32 | 1.00000 | 1.85688e-32 | 1.00000 |
| rad40syn  | 2.54075e-33 | 1.00000 | 2.54075e-33 | 1.00000 |
| rad40anti | 1.75145e-33 | 1.00000 | 1.75145e-33 | 1.00000 |
| PAH8+H    | 1.02274e-33 | 1.00000 | 1.02274e-33 | 1.00000 |
| rad56     | 5.15009e-34 | 1.00000 | 5.15009e-34 | 1.00000 |
| rad65     | 1.98107e-34 | 1.00000 | 1.98107e-34 | 1.00000 |
| rad64     | 3.18119e-36 | 1.00000 | 3.18119e-36 | 1.00000 |
| rad73     | 1.80216e-37 | 1.00000 | 1.80216e-37 | 1.00000 |
| rad71     | 3.59913e-39 | 1.00000 | 3.59913e-39 | 1.00000 |

10000000. Pa, 280.00000 K

=====

| Rate constant             | True (fraction)        | Effective (fraction)   |
|---------------------------|------------------------|------------------------|
| Total                     | 3.52572e-14 (1.00 )    | 3.52572e-14 (1.00 )    |
| Formation of rad19        | 3.52244e-14 (0.999 )   | 3.52244e-14 (0.999 )   |
| H-abstraction to cyc2enyl | 3.26639e-17 (0.000926) | 3.26639e-17 (0.000926) |
| H-abstraction to cyc1enyl | 9.42926e-20 (2.67e-06) | 9.42926e-20 (2.67e-06) |

| species                       | PYtrue      | Cumul    | PYeffective | Cumul    |
|-------------------------------|-------------|----------|-------------|----------|
| rad19anti                     | 0.944513    | 0.944513 | 0.944513    | 0.944513 |
| rad9                          | 0.0528945   | 0.997407 | 0.0528945   | 0.997407 |
| rad8                          | 0.00166008  | 0.999067 | 0.00166008  | 0.999067 |
| Benzene+cycloprop-2-enylidene | 0.000926445 | 0.999994 | 0.000926445 | 0.999994 |
| Benzene+cycloprop-1-enylidene | 2.67442e-06 | 0.999996 | 2.67442e-06 | 0.999996 |
| rad15                         | 1.64899e-06 | 0.999998 | 1.64899e-06 | 0.999998 |
| rad12                         | 1.53486e-06 | 1.000000 | 1.53486e-06 | 1.000000 |
| rad19syn                      | 1.75856e-09 | 1.000000 | 1.75856e-09 | 1.000000 |
| Indene+H                      | 1.05754e-09 | 1.000000 | 1.05754e-09 | 1.000000 |
| rad7                          | 5.67489e-10 | 1.000000 | 5.67489e-10 | 1.000000 |
| PhCHCCH2+H                    | 5.63697e-11 | 1.000000 | 5.63697e-11 | 1.000000 |
| PhcycC3H3_A+H                 | 1.14480e-11 | 1.000000 | 1.14480e-11 | 1.000000 |
| Phenyl+cycC3H4                | 3.51165e-12 | 1.000000 | 0.000000    | 1.000000 |
| rad11                         | 3.06988e-12 | 1.000000 | 3.06988e-12 | 1.000000 |
| rad2                          | 2.31058e-12 | 1.000000 | 2.31058e-12 | 1.000000 |
| rad6                          | 8.70644e-13 | 1.000000 | 8.70644e-13 | 1.000000 |
| PhcycC3H3_B+H                 | 5.40359e-13 | 1.000000 | 5.40359e-13 | 1.000000 |
| rad1                          | 5.38223e-13 | 1.000000 | 5.38223e-13 | 1.000000 |
| rad21                         | 2.98098e-13 | 1.000000 | 2.98098e-13 | 1.000000 |
| rad5                          | 1.14747e-13 | 1.000000 | 1.14747e-13 | 1.000000 |
| rad26                         | 7.66030e-14 | 1.000000 | 7.66030e-14 | 1.000000 |
| rad18                         | 2.64222e-14 | 1.000000 | 2.64222e-14 | 1.000000 |
| rad20                         | 2.55335e-14 | 1.000000 | 2.55335e-14 | 1.000000 |
| rad22                         | 4.15314e-15 | 1.000000 | 4.15314e-15 | 1.000000 |
| rad67                         | 8.47084e-16 | 1.000000 | 8.47084e-16 | 1.000000 |
| rad24                         | 7.23037e-16 | 1.000000 | 7.23037e-16 | 1.000000 |
| rad45                         | 5.70840e-16 | 1.000000 | 5.70840e-16 | 1.000000 |
| rad35                         | 3.54959e-16 | 1.000000 | 3.54959e-16 | 1.000000 |
| C2H2+PhCH2                    | 1.04127e-16 | 1.000000 | 1.04127e-16 | 1.000000 |
| rad36                         | 9.89007e-17 | 1.000000 | 9.89007e-17 | 1.000000 |
| rad10                         | 9.19581e-17 | 1.000000 | 9.19581e-17 | 1.000000 |
| Ph+MeAc                       | 2.90540e-17 | 1.000000 | 2.90540e-17 | 1.000000 |

|            |             |          |             |          |
|------------|-------------|----------|-------------|----------|
| rad3       | 2.59225e-17 | 1.000000 | 2.59225e-17 | 1.000000 |
| PhCCCH3+H  | 2.34417e-17 | 1.000000 | 2.34417e-17 | 1.000000 |
| rad4       | 1.97742e-17 | 1.000000 | 1.97742e-17 | 1.000000 |
| PhCCH+CH3  | 1.68659e-17 | 1.000000 | 1.68659e-17 | 1.000000 |
| Ph+Allene  | 7.60038e-18 | 1.000000 | 7.60038e-18 | 1.000000 |
| rad13      | 4.12403e-18 | 1.000000 | 4.12403e-18 | 1.000000 |
| rad25      | 4.04682e-18 | 1.000000 | 4.04682e-18 | 1.000000 |
| PhCH2CCH+H | 2.20062e-18 | 1.000000 | 2.20062e-18 | 1.000000 |
| rad27      | 1.91069e-18 | 1.000000 | 1.91069e-18 | 1.000000 |
| rad23      | 4.62816e-19 | 1.000000 | 4.62816e-19 | 1.000000 |
| rad33      | 1.05779e-19 | 1.000000 | 1.05779e-19 | 1.000000 |
| rad31      | 6.40993e-20 | 1.000000 | 6.40993e-20 | 1.000000 |
| rad30      | 4.48930e-20 | 1.000000 | 4.48930e-20 | 1.000000 |
| rad37      | 3.16001e-21 | 1.000000 | 3.16001e-21 | 1.000000 |
| rad28      | 1.79189e-21 | 1.000000 | 1.79189e-21 | 1.000000 |
| rad60syn   | 3.51459e-22 | 1.000000 | 3.51459e-22 | 1.000000 |
| PAH3+H     | 3.37681e-22 | 1.000000 | 3.37681e-22 | 1.000000 |
| rad14      | 1.93841e-22 | 1.000000 | 1.93841e-22 | 1.000000 |
| PAH7+H     | 1.89568e-22 | 1.000000 | 1.89568e-22 | 1.000000 |
| rad60anti  | 1.81924e-22 | 1.000000 | 1.81924e-22 | 1.000000 |
| rad59      | 5.99946e-23 | 1.000000 | 5.99946e-23 | 1.000000 |
| PAH10+CH3  | 4.52136e-23 | 1.000000 | 4.52136e-23 | 1.000000 |
| rad38      | 3.22910e-23 | 1.000000 | 3.22910e-23 | 1.000000 |
| rad43      | 3.15863e-25 | 1.000000 | 3.15863e-25 | 1.000000 |
| rad46      | 9.88783e-26 | 1.000000 | 9.88783e-26 | 1.000000 |
| rad58      | 7.76609e-26 | 1.000000 | 7.76609e-26 | 1.000000 |
| rad70      | 6.88636e-26 | 1.000000 | 6.88636e-26 | 1.000000 |
| PAH1+H     | 3.70128e-26 | 1.000000 | 3.70128e-26 | 1.000000 |
| rad34      | 3.62976e-27 | 1.000000 | 3.62976e-27 | 1.000000 |
| rad50      | 2.32115e-27 | 1.000000 | 2.32115e-27 | 1.000000 |
| PAH9+H     | 1.63136e-27 | 1.000000 | 1.63136e-27 | 1.000000 |
| rad54      | 1.38722e-27 | 1.000000 | 1.38722e-27 | 1.000000 |
| rad39      | 5.34330e-28 | 1.000000 | 5.34330e-28 | 1.000000 |
| rad41      | 4.54187e-28 | 1.000000 | 4.54187e-28 | 1.000000 |
| rad62      | 3.08667e-29 | 1.000000 | 3.08667e-29 | 1.000000 |
| rad61      | 2.96821e-29 | 1.000000 | 2.96821e-29 | 1.000000 |
| rad55      | 2.87440e-29 | 1.000000 | 2.87440e-29 | 1.000000 |
| rad52      | 2.56013e-29 | 1.000000 | 2.56013e-29 | 1.000000 |
| rad51      | 1.84782e-29 | 1.000000 | 1.84782e-29 | 1.000000 |
| rad47      | 1.52119e-29 | 1.000000 | 1.52119e-29 | 1.000000 |
| rad68syn   | 3.41531e-31 | 1.000000 | 3.41531e-31 | 1.000000 |
| rad68anti  | 2.46158e-31 | 1.000000 | 2.46158e-31 | 1.000000 |
| rad42      | 1.00260e-31 | 1.000000 | 1.00260e-31 | 1.000000 |
| rad53      | 4.64384e-32 | 1.000000 | 4.64384e-32 | 1.000000 |
| rad40syn   | 8.49362e-33 | 1.000000 | 8.49362e-33 | 1.000000 |
| rad40anti  | 5.90193e-33 | 1.000000 | 5.90193e-33 | 1.000000 |
| PAH8+H     | 3.47229e-33 | 1.000000 | 3.47229e-33 | 1.000000 |
| rad56      | 1.39308e-33 | 1.000000 | 1.39308e-33 | 1.000000 |
| rad65      | 6.13104e-34 | 1.000000 | 6.13104e-34 | 1.000000 |
| rad64      | 1.04085e-35 | 1.000000 | 1.04085e-35 | 1.000000 |
| rad73      | 6.82831e-37 | 1.000000 | 6.82831e-37 | 1.000000 |
| rad71      | 1.41181e-38 | 1.000000 | 1.41181e-38 | 1.000000 |

100000000. Pa, 290.000000 K

| Rate constant             | True (fraction)        | Effective (fraction)   |
|---------------------------|------------------------|------------------------|
| Total                     | 3.81171e-14 (1.00 )    | 3.81171e-14 (1.00 )    |
| Formation of rad19        | 3.80733e-14 (0.999 )   | 3.80733e-14 (0.999 )   |
| H-abstraction to cyc2enyl | 4.36868e-17 (0.00115 ) | 4.36868e-17 (0.00115 ) |
| H-abstraction to cyc1enyl | 1.56861e-19 (4.12e-06) | 1.56861e-19 (4.12e-06) |

| species                       | PYtrue      | Cumul    | PYeffective | Cumul    |
|-------------------------------|-------------|----------|-------------|----------|
| rad19anti                     | 0.940246    | 0.940246 | 0.940246    | 0.940246 |
| rad9                          | 0.0569585   | 0.997205 | 0.0569585   | 0.997205 |
| rad8                          | 0.00164118  | 0.998846 | 0.00164118  | 0.998846 |
| Benzene+cycloprop-2-enylidene | 0.00114612  | 0.999992 | 0.00114612  | 0.999992 |
| Benzene+cycloprop-1-enylidene | 4.11523e-06 | 0.999996 | 4.11523e-06 | 0.999996 |
| rad15                         | 1.98171e-06 | 0.999998 | 1.98171e-06 | 0.999998 |
| rad12                         | 1.77156e-06 | 1.000000 | 1.77156e-06 | 1.000000 |
| rad19syn                      | 1.96078e-09 | 1.000000 | 1.96078e-09 | 1.000000 |
| Indene+H                      | 1.45169e-09 | 1.000000 | 1.45169e-09 | 1.000000 |
| rad7                          | 6.62319e-10 | 1.000000 | 6.62319e-10 | 1.000000 |
| PhCHCCH2+H                    | 8.08041e-11 | 1.000000 | 8.08041e-11 | 1.000000 |
| PhcycC3H3_A+H                 | 2.03666e-11 | 1.000000 | 2.03666e-11 | 1.000000 |
| Phenyl+cycC3H4                | 5.15238e-12 | 1.000000 | 0.000000    | 1.000000 |
| rad11                         | 4.47005e-12 | 1.000000 | 4.47005e-12 | 1.000000 |
| rad2                          | 3.35315e-12 | 1.000000 | 3.35315e-12 | 1.000000 |
| rad6                          | 1.12443e-12 | 1.000000 | 1.12443e-12 | 1.000000 |

|               |             |          |             |          |
|---------------|-------------|----------|-------------|----------|
| PhcycC3H3_B+H | 1.10500e-12 | 1.000000 | 1.10500e-12 | 1.000000 |
| rad1          | 7.77721e-13 | 1.000000 | 7.77721e-13 | 1.000000 |
| rad21         | 4.56600e-13 | 1.000000 | 4.56600e-13 | 1.000000 |
| rad5          | 1.40722e-13 | 1.000000 | 1.40722e-13 | 1.000000 |
| rad26         | 1.19973e-13 | 1.000000 | 1.19973e-13 | 1.000000 |
| rad18         | 4.16164e-14 | 1.000000 | 4.16164e-14 | 1.000000 |
| rad20         | 3.67849e-14 | 1.000000 | 3.67849e-14 | 1.000000 |
| rad22         | 7.13955e-15 | 1.000000 | 7.13955e-15 | 1.000000 |
| rad67         | 1.48461e-15 | 1.000000 | 1.48461e-15 | 1.000000 |
| rad24         | 1.20170e-15 | 1.000000 | 1.20170e-15 | 1.000000 |
| rad45         | 1.06177e-15 | 1.000000 | 1.06177e-15 | 1.000000 |
| rad35         | 6.17374e-16 | 1.000000 | 6.17374e-16 | 1.000000 |
| rad36         | 1.83058e-16 | 1.000000 | 1.83058e-16 | 1.000000 |
| C2H2+PhCH2    | 1.71775e-16 | 1.000000 | 1.71775e-16 | 1.000000 |
| rad10         | 1.64835e-16 | 1.000000 | 1.64835e-16 | 1.000000 |
| Ph+MeAc       | 5.78357e-17 | 1.000000 | 5.78357e-17 | 1.000000 |
| rad3          | 4.73163e-17 | 1.000000 | 4.73163e-17 | 1.000000 |
| PhCCCH3+H     | 4.54593e-17 | 1.000000 | 4.54593e-17 | 1.000000 |
| rad4          | 3.60455e-17 | 1.000000 | 3.60455e-17 | 1.000000 |
| PhCCH+CH3     | 2.45133e-17 | 1.000000 | 2.45133e-17 | 1.000000 |
| Ph+Allene     | 1.52413e-17 | 1.000000 | 1.52413e-17 | 1.000000 |
| rad25         | 7.48635e-18 | 1.000000 | 7.48635e-18 | 1.000000 |
| rad13         | 6.08313e-18 | 1.000000 | 6.08313e-18 | 1.000000 |
| PhCH2CCH+H    | 4.58668e-18 | 1.000000 | 4.58668e-18 | 1.000000 |
| rad27         | 3.58746e-18 | 1.000000 | 3.58746e-18 | 1.000000 |
| rad23         | 9.51698e-19 | 1.000000 | 9.51698e-19 | 1.000000 |
| rad33         | 1.57938e-19 | 1.000000 | 1.57938e-19 | 1.000000 |
| rad31         | 9.49990e-20 | 1.000000 | 9.49990e-20 | 1.000000 |
| rad30         | 9.11690e-20 | 1.000000 | 9.11690e-20 | 1.000000 |
| rad37         | 6.90868e-21 | 1.000000 | 6.90868e-21 | 1.000000 |
| rad28         | 3.93289e-21 | 1.000000 | 3.93289e-21 | 1.000000 |
| PAH3+H        | 7.80709e-22 | 1.000000 | 7.80709e-22 | 1.000000 |
| rad60syn      | 7.64387e-22 | 1.000000 | 7.64387e-22 | 1.000000 |
| rad14         | 4.46373e-22 | 1.000000 | 4.46373e-22 | 1.000000 |
| PAH7+H        | 4.42139e-22 | 1.000000 | 4.42139e-22 | 1.000000 |
| rad60anti     | 3.97662e-22 | 1.000000 | 3.97662e-22 | 1.000000 |
| rad59         | 1.37380e-22 | 1.000000 | 1.37380e-22 | 1.000000 |
| PAH10+CH3     | 1.11110e-22 | 1.000000 | 1.11110e-22 | 1.000000 |
| rad38         | 7.59748e-23 | 1.000000 | 7.59748e-23 | 1.000000 |
| rad43         | 8.17231e-25 | 1.000000 | 8.17231e-25 | 1.000000 |
| rad46         | 2.46315e-25 | 1.000000 | 2.46315e-25 | 1.000000 |
| rad58         | 1.97225e-25 | 1.000000 | 1.97225e-25 | 1.000000 |
| rad70         | 1.77770e-25 | 1.000000 | 1.77770e-25 | 1.000000 |
| PAH1+H        | 9.61453e-26 | 1.000000 | 9.61453e-26 | 1.000000 |
| rad34         | 9.59843e-27 | 1.000000 | 9.59843e-27 | 1.000000 |
| rad50         | 6.17510e-27 | 1.000000 | 6.17510e-27 | 1.000000 |
| PAH9+H        | 4.21134e-27 | 1.000000 | 4.21134e-27 | 1.000000 |
| rad54         | 2.85874e-27 | 1.000000 | 2.85874e-27 | 1.000000 |
| rad39         | 1.43015e-27 | 1.000000 | 1.43015e-27 | 1.000000 |
| rad41         | 1.25723e-27 | 1.000000 | 1.25723e-27 | 1.000000 |
| rad62         | 9.02824e-29 | 1.000000 | 9.02824e-29 | 1.000000 |
| rad61         | 8.36468e-29 | 1.000000 | 8.36468e-29 | 1.000000 |
| rad52         | 7.22352e-29 | 1.000000 | 7.22352e-29 | 1.000000 |
| rad55         | 6.14172e-29 | 1.000000 | 6.14172e-29 | 1.000000 |
| rad51         | 5.35083e-29 | 1.000000 | 5.35083e-29 | 1.000000 |
| rad47         | 4.40697e-29 | 1.000000 | 4.40697e-29 | 1.000000 |
| rad68syn      | 9.80844e-31 | 1.000000 | 9.80844e-31 | 1.000000 |
| rad68anti     | 7.06318e-31 | 1.000000 | 7.06318e-31 | 1.000000 |
| rad42         | 3.05172e-31 | 1.000000 | 3.05172e-31 | 1.000000 |
| rad53         | 1.10749e-31 | 1.000000 | 1.10749e-31 | 1.000000 |
| rad40syn      | 2.57033e-32 | 1.000000 | 2.57033e-32 | 1.000000 |
| rad40anti     | 1.80081e-32 | 1.000000 | 1.80081e-32 | 1.000000 |
| PAH8+H        | 1.06315e-32 | 1.000000 | 1.06315e-32 | 1.000000 |
| rad56         | 3.54029e-33 | 1.000000 | 3.54029e-33 | 1.000000 |
| rad65         | 1.75561e-33 | 1.000000 | 1.75561e-33 | 1.000000 |
| rad64         | 3.09902e-35 | 1.000000 | 3.09902e-35 | 1.000000 |
| rad73         | 2.34301e-36 | 1.000000 | 2.34301e-36 | 1.000000 |
| rad71         | 4.99494e-38 | 1.000000 | 4.99494e-38 | 1.000000 |

100000000. Pa, 300.000000 K

| Rate constant             | True (fraction)        | Effective (fraction)   |
|---------------------------|------------------------|------------------------|
| Total                     | 5.34809e-14 (1.00 )    | 5.34809e-14 (1.00 )    |
| Formation of rad19        | 5.34010e-14 (0.999 )   | 5.34010e-14 (0.999 )   |
| H-abstraction to cyc2enyl | 7.95823e-17 (0.00149 ) | 7.95823e-17 (0.00149 ) |
| H-abstraction to cyclenyl | 3.44981e-19 (6.45e-06) | 3.44981e-19 (6.45e-06) |

  

| species | PYtrue | Cumul | PYeffective | Cumul |
|---------|--------|-------|-------------|-------|
| -----   | -----  | ----- | -----       | ----- |

|                               |             |          |             |          |
|-------------------------------|-------------|----------|-------------|----------|
| rad19anti                     | 0.912273    | 0.912273 | 0.912273    | 0.912273 |
| rad9                          | 0.0847994   | 0.997072 | 0.0847994   | 0.997072 |
| Benzene+cycloprop-2-enylidene | 0.00148805  | 0.998560 | 0.00148805  | 0.998560 |
| rad8                          | 0.00142077  | 0.999981 | 0.00142077  | 0.999981 |
| rad15                         | 8.18359e-06 | 0.999989 | 8.18359e-06 | 0.999989 |
| Benzene+cycloprop-1-enylidene | 6.45054e-06 | 0.999995 | 6.45054e-06 | 0.999995 |
| rad12                         | 4.37817e-06 | 1.000000 | 4.37817e-06 | 1.000000 |
| Indene+H                      | 3.59185e-08 | 1.000000 | 3.59185e-08 | 1.000000 |
| rad19syn                      | 1.33247e-08 | 1.000000 | 1.33247e-08 | 1.000000 |
| PhcycC3H3_A+H                 | 6.09241e-09 | 1.000000 | 6.09241e-09 | 1.000000 |
| PhCHCCH2+H                    | 4.03795e-09 | 1.000000 | 4.03795e-09 | 1.000000 |
| PhcycC3H3_B+H                 | 2.01524e-09 | 1.000000 | 2.01524e-09 | 1.000000 |
| rad7                          | 9.15176e-10 | 1.000000 | 9.15176e-10 | 1.000000 |
| rad11                         | 2.93990e-10 | 1.000000 | 2.93990e-10 | 1.000000 |
| rad2                          | 2.13899e-10 | 1.000000 | 2.13899e-10 | 1.000000 |
| rad21                         | 5.07558e-11 | 1.000000 | 5.07558e-11 | 1.000000 |
| rad1                          | 4.77017e-11 | 1.000000 | 4.77017e-11 | 1.000000 |
| rad26                         | 1.82265e-11 | 1.000000 | 1.82265e-11 | 1.000000 |
| Phenyl+cycC3H4                | 1.28353e-11 | 1.000000 | 0.000000    | 1.000000 |
| rad20                         | 1.05741e-11 | 1.000000 | 1.05741e-11 | 1.000000 |
| rad18                         | 9.49715e-12 | 1.000000 | 9.49715e-12 | 1.000000 |
| rad6                          | 8.06883e-12 | 1.000000 | 8.06883e-12 | 1.000000 |
| rad22                         | 6.11916e-12 | 1.000000 | 6.11916e-12 | 1.000000 |
| C2H2+PhCH2                    | 2.84311e-12 | 1.000000 | 2.84311e-12 | 1.000000 |
| rad45                         | 2.51761e-12 | 1.000000 | 2.51761e-12 | 1.000000 |
| rad67                         | 2.25787e-12 | 1.000000 | 2.25787e-12 | 1.000000 |
| rad5                          | 1.61926e-12 | 1.000000 | 1.61926e-12 | 1.000000 |
| Ph+MeAc                       | 1.33352e-12 | 1.000000 | 1.33352e-12 | 1.000000 |
| rad35                         | 8.27233e-13 | 1.000000 | 8.27233e-13 | 1.000000 |
| PhCCCH3+H                     | 6.43375e-13 | 1.000000 | 6.43375e-13 | 1.000000 |
| rad10                         | 4.48528e-13 | 1.000000 | 4.48528e-13 | 1.000000 |
| Ph+Allene                     | 4.24013e-13 | 1.000000 | 4.24013e-13 | 1.000000 |
| PhCH2CCH+H                    | 3.49346e-13 | 1.000000 | 3.49346e-13 | 1.000000 |
| rad36                         | 3.07442e-13 | 1.000000 | 3.07442e-13 | 1.000000 |
| rad24                         | 2.94325e-13 | 1.000000 | 2.94325e-13 | 1.000000 |
| PhCCH+CH3                     | 1.63244e-13 | 1.000000 | 1.63244e-13 | 1.000000 |
| rad3                          | 1.45096e-13 | 1.000000 | 1.45096e-13 | 1.000000 |
| rad4                          | 1.10571e-13 | 1.000000 | 1.10571e-13 | 1.000000 |
| rad23                         | 4.01951e-14 | 1.000000 | 4.01951e-14 | 1.000000 |
| rad25                         | 3.14025e-14 | 1.000000 | 3.14025e-14 | 1.000000 |
| rad27                         | 1.73377e-14 | 1.000000 | 1.73377e-14 | 1.000000 |
| rad30                         | 4.13047e-15 | 1.000000 | 4.13047e-15 | 1.000000 |
| rad13                         | 2.89854e-15 | 1.000000 | 2.89854e-15 | 1.000000 |
| PAH3+H                        | 1.20894e-15 | 1.000000 | 1.20894e-15 | 1.000000 |
| rad37                         | 1.10310e-15 | 1.000000 | 1.10310e-15 | 1.000000 |
| rad28                         | 8.28533e-16 | 1.000000 | 8.28533e-16 | 1.000000 |
| PAH10+CH3                     | 5.49659e-16 | 1.000000 | 5.49659e-16 | 1.000000 |
| PAH7+H                        | 5.13995e-16 | 1.000000 | 5.13995e-16 | 1.000000 |
| rad60syn                      | 1.92269e-16 | 1.000000 | 1.92269e-16 | 1.000000 |
| rad14                         | 1.76817e-16 | 1.000000 | 1.76817e-16 | 1.000000 |
| rad59                         | 1.40568e-16 | 1.000000 | 1.40568e-16 | 1.000000 |
| rad60anti                     | 1.14033e-16 | 1.000000 | 1.14033e-16 | 1.000000 |
| rad38                         | 9.17925e-17 | 1.000000 | 9.17925e-17 | 1.000000 |
| rad33                         | 5.93354e-17 | 1.000000 | 5.93354e-17 | 1.000000 |
| rad43                         | 1.97915e-17 | 1.000000 | 1.97915e-17 | 1.000000 |
| rad70                         | 9.61121e-18 | 1.000000 | 9.61121e-18 | 1.000000 |
| rad31                         | 7.25599e-18 | 1.000000 | 7.25599e-18 | 1.000000 |
| rad58                         | 5.21386e-18 | 1.000000 | 5.21386e-18 | 1.000000 |
| PAH1+H                        | 5.14899e-18 | 1.000000 | 5.14899e-18 | 1.000000 |
| rad46                         | 1.91681e-18 | 1.000000 | 1.91681e-18 | 1.000000 |
| rad34                         | 1.73342e-18 | 1.000000 | 1.73342e-18 | 1.000000 |
| PAH9+H                        | 1.37147e-18 | 1.000000 | 1.37147e-18 | 1.000000 |
| rad39                         | 9.15154e-19 | 1.000000 | 9.15154e-19 | 1.000000 |
| rad50                         | 7.21592e-19 | 1.000000 | 7.21592e-19 | 1.000000 |
| rad41                         | 6.47632e-19 | 1.000000 | 6.47632e-19 | 1.000000 |
| rad62                         | 3.16801e-19 | 1.000000 | 3.16801e-19 | 1.000000 |
| rad61                         | 2.25704e-19 | 1.000000 | 2.25704e-19 | 1.000000 |
| rad54                         | 1.28680e-19 | 1.000000 | 1.28680e-19 | 1.000000 |
| PAH8+H                        | 1.10738e-19 | 1.000000 | 1.10738e-19 | 1.000000 |
| rad51                         | 1.02296e-19 | 1.000000 | 1.02296e-19 | 1.000000 |
| rad52                         | 4.19094e-20 | 1.000000 | 4.19094e-20 | 1.000000 |
| rad68syn                      | 4.18215e-20 | 1.000000 | 4.18215e-20 | 1.000000 |
| rad47                         | 3.11713e-20 | 1.000000 | 3.11713e-20 | 1.000000 |
| rad68anti                     | 2.76383e-20 | 1.000000 | 2.76383e-20 | 1.000000 |
| rad40syn                      | 2.55132e-20 | 1.000000 | 2.55132e-20 | 1.000000 |
| rad40anti                     | 2.05754e-20 | 1.000000 | 2.05754e-20 | 1.000000 |
| rad42                         | 1.40150e-20 | 1.000000 | 1.40150e-20 | 1.000000 |
| rad55                         | 8.04332e-21 | 1.000000 | 8.04332e-21 | 1.000000 |
| rad53                         | 1.16797e-21 | 1.000000 | 1.16797e-21 | 1.000000 |
| rad56                         | 8.74853e-22 | 1.000000 | 8.74853e-22 | 1.000000 |

|       |             |          |             |          |
|-------|-------------|----------|-------------|----------|
| rad73 | 4.28306e-22 | 1.000000 | 4.28306e-22 | 1.000000 |
| rad65 | 4.01079e-22 | 1.000000 | 4.01079e-22 | 1.000000 |
| rad71 | 3.68081e-22 | 1.000000 | 3.68081e-22 | 1.000000 |
| rad64 | 2.39933e-22 | 1.000000 | 2.39933e-22 | 1.000000 |
| rad72 | 4.45981e-24 | 1.000000 | 4.45981e-24 | 1.000000 |

100000000. Pa, 310.000000 K

| Rate constant             | True (fraction)        | Effective (fraction)   |
|---------------------------|------------------------|------------------------|
| Total                     | 5.92544e-14 (1.00 )    | 5.92544e-14 (1.00 )    |
| Formation of rad19        | 5.91462e-14 (0.998 )   | 5.91462e-14 (0.998 )   |
| H-abstraction to cyc2enyl | 1.07628e-16 (0.00182 ) | 1.07628e-16 (0.00182 ) |
| H-abstraction to cyclenyl | 5.62537e-19 (9.49e-06) | 5.62537e-19 (9.49e-06) |

| species                       | PYtrue      | Cumul    | PYeffective | Cumul    |
|-------------------------------|-------------|----------|-------------|----------|
| rad19anti                     | 0.930107    | 0.930107 | 0.930107    | 0.930107 |
| rad9                          | 0.0664596   | 0.996566 | 0.0664596   | 0.996566 |
| Benzene+cycloprop-2-enylidene | 0.00181637  | 0.998383 | 0.00181637  | 0.998383 |
| rad8                          | 0.00160211  | 0.999985 | 0.00160211  | 0.999985 |
| Benzene+cycloprop-1-enylidene | 9.49359e-06 | 0.999994 | 9.49359e-06 | 0.999994 |
| rad15                         | 2.93088e-06 | 0.999997 | 2.93088e-06 | 0.999997 |
| rad12                         | 2.39035e-06 | 1.000000 | 2.39035e-06 | 1.000000 |
| Indene+H                      | 2.84806e-09 | 1.000000 | 2.84806e-09 | 1.000000 |
| rad19syn                      | 2.82833e-09 | 1.000000 | 2.82833e-09 | 1.000000 |
| rad7                          | 9.09167e-10 | 1.000000 | 9.09167e-10 | 1.000000 |
| PhCHCCH2+H                    | 1.73372e-10 | 1.000000 | 1.73372e-10 | 1.000000 |
| PhcycC3H3_A+H                 | 6.19111e-11 | 1.000000 | 6.19111e-11 | 1.000000 |
| Phenyl+cycC3H4                | 1.08688e-11 | 1.000000 | 0.000000    | 1.000000 |
| rad11                         | 9.86857e-12 | 1.000000 | 9.86857e-12 | 1.000000 |
| rad2                          | 7.37462e-12 | 1.000000 | 7.37462e-12 | 1.000000 |
| PhcycC3H3_B+H                 | 4.10697e-12 | 1.000000 | 4.10697e-12 | 1.000000 |
| rad6                          | 1.89362e-12 | 1.000000 | 1.89362e-12 | 1.000000 |
| rad1                          | 1.69994e-12 | 1.000000 | 1.69994e-12 | 1.000000 |
| rad21                         | 1.10625e-12 | 1.000000 | 1.10625e-12 | 1.000000 |
| rad26                         | 3.03300e-13 | 1.000000 | 3.03300e-13 | 1.000000 |
| rad5                          | 2.14529e-13 | 1.000000 | 2.14529e-13 | 1.000000 |
| rad18                         | 1.06879e-13 | 1.000000 | 1.06879e-13 | 1.000000 |
| rad20                         | 8.36248e-14 | 1.000000 | 8.36248e-14 | 1.000000 |
| rad22                         | 2.13194e-14 | 1.000000 | 2.13194e-14 | 1.000000 |
| rad67                         | 4.58193e-15 | 1.000000 | 4.58193e-15 | 1.000000 |
| rad45                         | 3.60996e-15 | 1.000000 | 3.60996e-15 | 1.000000 |
| rad24                         | 3.34565e-15 | 1.000000 | 3.34565e-15 | 1.000000 |
| rad35                         | 1.88213e-15 | 1.000000 | 1.88213e-15 | 1.000000 |
| rad36                         | 6.17458e-16 | 1.000000 | 6.17458e-16 | 1.000000 |
| rad10                         | 5.32561e-16 | 1.000000 | 5.32561e-16 | 1.000000 |
| C2H2+PhCH2                    | 5.04645e-16 | 1.000000 | 5.04645e-16 | 1.000000 |
| Ph+MeAc                       | 2.18308e-16 | 1.000000 | 2.18308e-16 | 1.000000 |
| PhCCCH3+H                     | 1.65666e-16 | 1.000000 | 1.65666e-16 | 1.000000 |
| rad3                          | 1.57366e-16 | 1.000000 | 1.57366e-16 | 1.000000 |
| rad4                          | 1.19642e-16 | 1.000000 | 1.19642e-16 | 1.000000 |
| Ph+Allene                     | 5.78897e-17 | 1.000000 | 5.78897e-17 | 1.000000 |
| PhCCH+CH3                     | 5.26963e-17 | 1.000000 | 5.26963e-17 | 1.000000 |
| rad25                         | 2.51946e-17 | 1.000000 | 2.51946e-17 | 1.000000 |
| PhCH2CCH+H                    | 1.84041e-17 | 1.000000 | 1.84041e-17 | 1.000000 |
| rad13                         | 1.33261e-17 | 1.000000 | 1.33261e-17 | 1.000000 |
| rad27                         | 1.24728e-17 | 1.000000 | 1.24728e-17 | 1.000000 |
| rad23                         | 3.82747e-18 | 1.000000 | 3.82747e-18 | 1.000000 |
| rad30                         | 3.58407e-19 | 1.000000 | 3.58407e-19 | 1.000000 |
| rad33                         | 3.53442e-19 | 1.000000 | 3.53442e-19 | 1.000000 |
| rad31                         | 2.25903e-19 | 1.000000 | 2.25903e-19 | 1.000000 |
| rad37                         | 3.00949e-20 | 1.000000 | 3.00949e-20 | 1.000000 |
| rad28                         | 1.72427e-20 | 1.000000 | 1.72427e-20 | 1.000000 |
| PAH3+H                        | 3.67616e-21 | 1.000000 | 3.67616e-21 | 1.000000 |
| rad60syn                      | 3.31237e-21 | 1.000000 | 3.31237e-21 | 1.000000 |
| rad14                         | 2.14248e-21 | 1.000000 | 2.14248e-21 | 1.000000 |
| PAH7+H                        | 2.10169e-21 | 1.000000 | 2.10169e-21 | 1.000000 |
| rad60anti                     | 1.73524e-21 | 1.000000 | 1.73524e-21 | 1.000000 |
| rad59                         | 6.38489e-22 | 1.000000 | 6.38489e-22 | 1.000000 |
| PAH10+CH3                     | 5.67087e-22 | 1.000000 | 5.67087e-22 | 1.000000 |
| rad38                         | 3.66337e-22 | 1.000000 | 3.66337e-22 | 1.000000 |
| rad43                         | 4.55494e-24 | 1.000000 | 4.55494e-24 | 1.000000 |
| rad46                         | 1.32537e-24 | 1.000000 | 1.32537e-24 | 1.000000 |
| rad58                         | 1.05038e-24 | 1.000000 | 1.05038e-24 | 1.000000 |
| rad70                         | 9.67816e-25 | 1.000000 | 9.67816e-25 | 1.000000 |
| PAH1+H                        | 5.28382e-25 | 1.000000 | 5.28382e-25 | 1.000000 |
| rad34                         | 5.39480e-26 | 1.000000 | 5.39480e-26 | 1.000000 |
| rad50                         | 3.65013e-26 | 1.000000 | 3.65013e-26 | 1.000000 |
| PAH9+H                        | 2.36225e-26 | 1.000000 | 2.36225e-26 | 1.000000 |

|           |             |          |             |          |
|-----------|-------------|----------|-------------|----------|
| rad54     | 1.12759e-26 | 1.000000 | 1.12759e-26 | 1.000000 |
| rad39     | 8.37026e-27 | 1.000000 | 8.37026e-27 | 1.000000 |
| rad41     | 7.68105e-27 | 1.000000 | 7.68105e-27 | 1.000000 |
| rad62     | 6.16431e-28 | 1.000000 | 6.16431e-28 | 1.000000 |
| rad61     | 5.13281e-28 | 1.000000 | 5.13281e-28 | 1.000000 |
| rad52     | 4.71789e-28 | 1.000000 | 4.71789e-28 | 1.000000 |
| rad51     | 3.63467e-28 | 1.000000 | 3.63467e-28 | 1.000000 |
| rad47     | 2.94512e-28 | 1.000000 | 2.94512e-28 | 1.000000 |
| rad55     | 2.56165e-28 | 1.000000 | 2.56165e-28 | 1.000000 |
| rad68syn  | 6.17220e-30 | 1.000000 | 6.17220e-30 | 1.000000 |
| rad68anti | 4.43905e-30 | 1.000000 | 4.43905e-30 | 1.000000 |
| rad42     | 2.20733e-30 | 1.000000 | 2.20733e-30 | 1.000000 |
| rad53     | 5.44909e-31 | 1.000000 | 5.44909e-31 | 1.000000 |
| rad40syn  | 1.77516e-31 | 1.000000 | 1.77516e-31 | 1.000000 |
| rad40anti | 1.26500e-31 | 1.000000 | 1.26500e-31 | 1.000000 |
| PAH8+H    | 7.45648e-32 | 1.000000 | 7.45648e-32 | 1.000000 |
| rad56     | 1.91436e-32 | 1.000000 | 1.91436e-32 | 1.000000 |
| rad65     | 1.13254e-32 | 1.000000 | 1.13254e-32 | 1.000000 |
| rad64     | 2.09038e-34 | 1.000000 | 2.09038e-34 | 1.000000 |
| rad73     | 2.08558e-35 | 1.000000 | 2.08558e-35 | 1.000000 |
| rad71     | 4.68218e-37 | 1.000000 | 4.68218e-37 | 1.000000 |

100000000. Pa, 400.000000 K

| Rate constant             | True (fraction)        | Effective (fraction)   |
|---------------------------|------------------------|------------------------|
| Total                     | 1.29463e-13 (1.00 )    | 1.29463e-13 (1.00 )    |
| Formation of rad19        | 1.28526e-13 (0.993 )   | 1.28526e-13 (0.993 )   |
| H-abstraction to cyc2enyl | 9.19357e-16 (0.00710 ) | 9.19357e-16 (0.00710 ) |
| H-abstraction to cyclenyl | 1.69485e-17 (0.000131) | 1.69485e-17 (0.000131) |

| species                       | PYtrue      | Cumul    | PYeffective | Cumul    |
|-------------------------------|-------------|----------|-------------|----------|
| rad19anti                     | 0.665246    | 0.665246 | 0.665246    | 0.665246 |
| rad9                          | 0.325766    | 0.991012 | 0.325766    | 0.991012 |
| Benzene+cycloprop-2-enylidene | 0.00710133  | 0.998113 | 0.00710133  | 0.998113 |
| rad8                          | 0.00115653  | 0.999269 | 0.00115653  | 0.999269 |
| rad15                         | 0.000431514 | 0.999701 | 0.000431514 | 0.999701 |
| Benzene+cycloprop-1-enylidene | 0.000130914 | 0.999832 | 0.000130914 | 0.999832 |
| Indene+H                      | 6.11330e-05 | 0.999893 | 6.11330e-05 | 0.999893 |
| rad12                         | 4.07339e-05 | 0.999934 | 4.07339e-05 | 0.999934 |
| PhcycC3H3_A+H                 | 2.28413e-05 | 0.999957 | 2.28413e-05 | 0.999957 |
| PhCHCCH2+H                    | 2.00130e-05 | 0.999977 | 2.00130e-05 | 0.999977 |
| PhcycC3H3_B+H                 | 1.85739e-05 | 0.999995 | 1.85739e-05 | 0.999995 |
| rad11                         | 9.36165e-07 | 0.999996 | 9.36165e-07 | 0.999996 |
| rad19syn                      | 7.76055e-07 | 0.999997 | 7.76055e-07 | 0.999997 |
| rad2                          | 6.08891e-07 | 0.999997 | 6.08891e-07 | 0.999997 |
| C2H2+PhCH2                    | 3.72283e-07 | 0.999998 | 3.72283e-07 | 0.999998 |
| Ph+MeAc                       | 3.21960e-07 | 0.999998 | 3.21960e-07 | 0.999998 |
| rad6                          | 2.87308e-07 | 0.999998 | 2.87308e-07 | 0.999998 |
| PhCH2CCH+H                    | 1.65367e-07 | 0.999999 | 1.65367e-07 | 0.999999 |
| rad1                          | 1.51052e-07 | 0.999999 | 1.51052e-07 | 0.999999 |
| Ph+Allene                     | 1.50824e-07 | 0.999999 | 1.50824e-07 | 0.999999 |
| rad26                         | 1.35848e-07 | 0.999999 | 1.35848e-07 | 0.999999 |
| rad67                         | 1.33997e-07 | 0.999999 | 1.33997e-07 | 0.999999 |
| rad21                         | 1.25608e-07 | 0.999999 | 1.25608e-07 | 0.999999 |
| PhCCCH3+H                     | 1.23961e-07 | 0.999999 | 1.23961e-07 | 0.999999 |
| rad22                         | 1.21345e-07 | 1.000000 | 1.21345e-07 | 1.000000 |
| rad45                         | 1.15038e-07 | 1.000000 | 1.15038e-07 | 1.000000 |
| PhCCH+CH3                     | 6.97740e-08 | 1.000000 | 6.97740e-08 | 1.000000 |
| rad20                         | 6.02518e-08 | 1.000000 | 6.02518e-08 | 1.000000 |
| rad18                         | 5.30166e-08 | 1.000000 | 5.30166e-08 | 1.000000 |
| rad35                         | 4.77331e-08 | 1.000000 | 4.77331e-08 | 1.000000 |
| rad10                         | 3.27358e-08 | 1.000000 | 3.27358e-08 | 1.000000 |
| rad23                         | 1.73070e-08 | 1.000000 | 1.73070e-08 | 1.000000 |
| rad5                          | 1.43613e-08 | 1.000000 | 1.43613e-08 | 1.000000 |
| rad36                         | 1.16164e-08 | 1.000000 | 1.16164e-08 | 1.000000 |
| rad7                          | 7.32472e-09 | 1.000000 | 7.32472e-09 | 1.000000 |
| rad3                          | 3.06869e-09 | 1.000000 | 3.06869e-09 | 1.000000 |
| rad4                          | 2.41578e-09 | 1.000000 | 2.41578e-09 | 1.000000 |
| PAH10+CH3                     | 1.94727e-09 | 1.000000 | 1.94727e-09 | 1.000000 |
| PAH3+H                        | 1.78065e-09 | 1.000000 | 1.78065e-09 | 1.000000 |
| rad30                         | 1.43355e-09 | 1.000000 | 1.43355e-09 | 1.000000 |
| rad25                         | 1.15540e-09 | 1.000000 | 1.15540e-09 | 1.000000 |
| rad37                         | 1.12327e-09 | 1.000000 | 1.12327e-09 | 1.000000 |
| PAH7+H                        | 8.03113e-10 | 1.000000 | 8.03113e-10 | 1.000000 |
| rad24                         | 7.84217e-10 | 1.000000 | 7.84217e-10 | 1.000000 |
| Phenyl+cycC3H4                | 6.90116e-10 | 1.000000 | 0.00000     | 1.000000 |
| rad28                         | 6.58656e-10 | 1.000000 | 6.58656e-10 | 1.000000 |
| rad27                         | 5.45865e-10 | 1.000000 | 5.45865e-10 | 1.000000 |

|           |             |          |             |          |
|-----------|-------------|----------|-------------|----------|
| rad13     | 3.19168e-10 | 1.000000 | 3.19168e-10 | 1.000000 |
| rad38     | 2.34430e-10 | 1.000000 | 2.34430e-10 | 1.000000 |
| rad59     | 1.72668e-10 | 1.000000 | 1.72668e-10 | 1.000000 |
| rad60syn  | 1.44903e-10 | 1.000000 | 1.44903e-10 | 1.000000 |
| rad60anti | 9.02835e-11 | 1.000000 | 9.02835e-11 | 1.000000 |
| PAH9+H    | 4.90512e-11 | 1.000000 | 4.90512e-11 | 1.000000 |
| rad43     | 4.35460e-11 | 1.000000 | 4.35460e-11 | 1.000000 |
| PAH1+H    | 3.75450e-11 | 1.000000 | 3.75450e-11 | 1.000000 |
| rad70     | 3.53929e-11 | 1.000000 | 3.53929e-11 | 1.000000 |
| rad39     | 2.48943e-11 | 1.000000 | 2.48943e-11 | 1.000000 |
| rad14     | 2.38737e-11 | 1.000000 | 2.38737e-11 | 1.000000 |
| rad58     | 1.74755e-11 | 1.000000 | 1.74755e-11 | 1.000000 |
| rad46     | 1.61149e-11 | 1.000000 | 1.61149e-11 | 1.000000 |
| rad50     | 1.53734e-11 | 1.000000 | 1.53734e-11 | 1.000000 |
| rad33     | 9.32192e-12 | 1.000000 | 9.32192e-12 | 1.000000 |
| rad34     | 8.81662e-12 | 1.000000 | 8.81662e-12 | 1.000000 |
| rad51     | 4.48790e-12 | 1.000000 | 4.48790e-12 | 1.000000 |
| rad54     | 3.22964e-12 | 1.000000 | 3.22964e-12 | 1.000000 |
| rad61     | 3.14752e-12 | 1.000000 | 3.14752e-12 | 1.000000 |
| rad41     | 3.04587e-12 | 1.000000 | 3.04587e-12 | 1.000000 |
| PAH8+H    | 2.97134e-12 | 1.000000 | 2.97134e-12 | 1.000000 |
| rad62     | 1.42764e-12 | 1.000000 | 1.42764e-12 | 1.000000 |
| rad52     | 1.32286e-12 | 1.000000 | 1.32286e-12 | 1.000000 |
| rad68syn  | 5.99303e-13 | 1.000000 | 5.99303e-13 | 1.000000 |
| rad40syn  | 4.85984e-13 | 1.000000 | 4.85984e-13 | 1.000000 |
| rad40anti | 3.93426e-13 | 1.000000 | 3.93426e-13 | 1.000000 |
| rad68anti | 3.90698e-13 | 1.000000 | 3.90698e-13 | 1.000000 |
| rad55     | 2.44613e-13 | 1.000000 | 2.44613e-13 | 1.000000 |
| rad47     | 2.24435e-13 | 1.000000 | 2.24435e-13 | 1.000000 |
| rad31     | 1.28076e-13 | 1.000000 | 1.28076e-13 | 1.000000 |
| rad71     | 1.22681e-13 | 1.000000 | 1.22681e-13 | 1.000000 |
| rad42     | 1.10669e-13 | 1.000000 | 1.10669e-13 | 1.000000 |
| rad73     | 9.36299e-14 | 1.000000 | 9.36299e-14 | 1.000000 |
| rad56     | 7.74671e-14 | 1.000000 | 7.74671e-14 | 1.000000 |
| rad53     | 7.27968e-14 | 1.000000 | 7.27968e-14 | 1.000000 |
| rad65     | 5.91233e-14 | 1.000000 | 5.91233e-14 | 1.000000 |
| rad64     | 3.22968e-14 | 1.000000 | 3.22968e-14 | 1.000000 |
| rad72     | 3.63460e-15 | 1.000000 | 3.63460e-15 | 1.000000 |

10000000. Pa, 500.00000 K

=====

| Rate constant             | True (fraction)        | Effective (fraction)   |
|---------------------------|------------------------|------------------------|
| Total                     | 2.52837e-13 (1.00 )    | 2.52837e-13 (1.00 )    |
| Formation of rad19        | 2.47941e-13 (0.981 )   | 2.47941e-13 (0.981 )   |
| H-abstraction to cyc2enyl | 4.69058e-15 (0.0186 )  | 4.69058e-15 (0.0186 )  |
| H-abstraction to cyc1enyl | 2.05381e-16 (0.000812) | 2.05381e-16 (0.000812) |

| species                       | PYtrue      | Cumul    | PYeffective | Cumul    |
|-------------------------------|-------------|----------|-------------|----------|
| rad9                          | 0.812835    | 0.812835 | 0.812835    | 0.812835 |
| rad19anti                     | 0.146853    | 0.959689 | 0.146853    | 0.959689 |
| Benzene+cycloprop-2-enylidene | 0.0185518   | 0.978240 | 0.0185518   | 0.978240 |
| Indene+H                      | 0.00576294  | 0.984003 | 0.00576294  | 0.984003 |
| rad15                         | 0.00516934  | 0.989173 | 0.00516934  | 0.989173 |
| PhCHCCH2+H                    | 0.00372371  | 0.992896 | 0.00372371  | 0.992896 |
| PhcycC3H3_B+H                 | 0.00232827  | 0.995225 | 0.00232827  | 0.995225 |
| PhcycC3H3_A+H                 | 0.00212660  | 0.997351 | 0.00212660  | 0.997351 |
| rad8                          | 0.000866323 | 0.998218 | 0.000866323 | 0.998218 |
| Benzene+cycloprop-1-enylidene | 0.000812306 | 0.999030 | 0.000812306 | 0.999030 |
| rad12                         | 0.000164457 | 0.999194 | 0.000164457 | 0.999194 |
| C2H2+PhCH2                    | 0.000113009 | 0.999307 | 0.000113009 | 0.999307 |
| Ph+MeAc                       | 0.000110645 | 0.999418 | 0.000110645 | 0.999418 |
| PhCH2CCH+H                    | 7.70679e-05 | 0.999495 | 7.70679e-05 | 0.999495 |
| rad6                          | 6.66562e-05 | 0.999562 | 6.66562e-05 | 0.999562 |
| Ph+Allene                     | 6.65969e-05 | 0.999628 | 6.65969e-05 | 0.999628 |
| rad11                         | 5.72077e-05 | 0.999685 | 5.72077e-05 | 0.999685 |
| rad19syn                      | 5.51595e-05 | 0.999741 | 5.51595e-05 | 0.999741 |
| rad67                         | 4.15851e-05 | 0.999782 | 4.15851e-05 | 0.999782 |
| PhCCCH3+H                     | 3.92990e-05 | 0.999822 | 3.92990e-05 | 0.999822 |
| rad2                          | 2.94755e-05 | 0.999851 | 2.94755e-05 | 0.999851 |
| rad45                         | 2.94119e-05 | 0.999880 | 2.94119e-05 | 0.999880 |
| PhCCH+CH3                     | 2.58585e-05 | 0.999906 | 2.58585e-05 | 0.999906 |
| rad26                         | 2.14989e-05 | 0.999928 | 2.14989e-05 | 0.999928 |
| rad35                         | 1.48249e-05 | 0.999943 | 1.48249e-05 | 0.999943 |
| rad22                         | 1.24157e-05 | 0.999955 | 1.24157e-05 | 0.999955 |
| rad1                          | 9.02594e-06 | 0.999964 | 9.02594e-06 | 0.999964 |
| rad23                         | 7.35307e-06 | 0.999971 | 7.35307e-06 | 0.999971 |
| rad10                         | 6.94872e-06 | 0.999978 | 6.94872e-06 | 0.999978 |
| rad21                         | 5.40947e-06 | 0.999984 | 5.40947e-06 | 0.999984 |



|                |             |          |             |          |
|----------------|-------------|----------|-------------|----------|
| rad20          | 2.89437e-06 | 0.999987 | 2.89437e-06 | 0.999987 |
| rad36          | 2.75143e-06 | 0.999989 | 2.75143e-06 | 0.999989 |
| rad18          | 2.52701e-06 | 0.999992 | 2.52701e-06 | 0.999992 |
| PAH10+CH3      | 1.79034e-06 | 0.999994 | 1.79034e-06 | 0.999994 |
| PAH3+H         | 1.10972e-06 | 0.999995 | 1.10972e-06 | 0.999995 |
| rad7           | 9.14303e-07 | 0.999996 | 9.14303e-07 | 0.999996 |
| rad37          | 8.16419e-07 | 0.999997 | 8.16419e-07 | 0.999997 |
| rad5           | 6.84388e-07 | 0.999997 | 6.84388e-07 | 0.999997 |
| rad30          | 6.07515e-07 | 0.999998 | 6.07515e-07 | 0.999998 |
| PAH7+H         | 5.55077e-07 | 0.999998 | 5.55077e-07 | 0.999998 |
| rad28          | 3.49051e-07 | 0.999999 | 3.49051e-07 | 0.999999 |
| rad38          | 2.15092e-07 | 0.999999 | 2.15092e-07 | 0.999999 |
| rad3           | 2.02807e-07 | 0.999999 | 2.02807e-07 | 0.999999 |
| rad4           | 1.67245e-07 | 0.999999 | 1.67245e-07 | 0.999999 |
| rad25          | 1.10560e-07 | 0.999999 | 1.10560e-07 | 0.999999 |
| rad59          | 1.02452e-07 | 1.000000 | 1.02452e-07 | 1.000000 |
| Phenyl+cycC3H4 | 7.80279e-08 | 1.000000 | 0.000000    | 1.000000 |
| rad60syn       | 7.62922e-08 | 1.000000 | 7.62922e-08 | 1.000000 |
| PAH9+H         | 7.50043e-08 | 1.000000 | 7.50043e-08 | 1.000000 |
| rad13          | 6.91120e-08 | 1.000000 | 6.91120e-08 | 1.000000 |
| rad60anti      | 4.81403e-08 | 1.000000 | 4.81403e-08 | 1.000000 |
| rad27          | 3.98320e-08 | 1.000000 | 3.98320e-08 | 1.000000 |
| PAH1+H         | 3.67976e-08 | 1.000000 | 3.67976e-08 | 1.000000 |
| rad24          | 3.52585e-08 | 1.000000 | 3.52585e-08 | 1.000000 |
| rad39          | 3.36621e-08 | 1.000000 | 3.36621e-08 | 1.000000 |
| rad43          | 2.48238e-08 | 1.000000 | 2.48238e-08 | 1.000000 |
| rad70          | 2.46694e-08 | 1.000000 | 2.46694e-08 | 1.000000 |
| rad50          | 2.30453e-08 | 1.000000 | 2.30453e-08 | 1.000000 |
| rad46          | 2.06134e-08 | 1.000000 | 2.06134e-08 | 1.000000 |
| rad58          | 1.30028e-08 | 1.000000 | 1.30028e-08 | 1.000000 |
| rad51          | 7.42037e-09 | 1.000000 | 7.42037e-09 | 1.000000 |
| rad34          | 6.63103e-09 | 1.000000 | 6.63103e-09 | 1.000000 |
| rad54          | 3.91094e-09 | 1.000000 | 3.91094e-09 | 1.000000 |
| rad61          | 3.58734e-09 | 1.000000 | 3.58734e-09 | 1.000000 |
| PAH8+H         | 3.10663e-09 | 1.000000 | 3.10663e-09 | 1.000000 |
| rad14          | 2.45639e-09 | 1.000000 | 2.45639e-09 | 1.000000 |
| rad33          | 2.22066e-09 | 1.000000 | 2.22066e-09 | 1.000000 |
| rad41          | 2.12835e-09 | 1.000000 | 2.12835e-09 | 1.000000 |
| rad52          | 2.08399e-09 | 1.000000 | 2.08399e-09 | 1.000000 |
| rad47          | 1.82863e-09 | 1.000000 | 1.82863e-09 | 1.000000 |
| rad62          | 8.90130e-10 | 1.000000 | 8.90131e-10 | 1.000000 |
| rad68syn       | 5.58835e-10 | 1.000000 | 5.58835e-10 | 1.000000 |
| rad40syn       | 4.74257e-10 | 1.000000 | 4.74257e-10 | 1.000000 |
| rad40anti      | 3.83840e-10 | 1.000000 | 3.83840e-10 | 1.000000 |
| rad68anti      | 3.63343e-10 | 1.000000 | 3.63343e-10 | 1.000000 |
| rad55          | 3.05822e-10 | 1.000000 | 3.05822e-10 | 1.000000 |
| rad71          | 2.15631e-10 | 1.000000 | 2.15631e-10 | 1.000000 |
| rad73          | 1.61683e-10 | 1.000000 | 1.61683e-10 | 1.000000 |
| rad31          | 1.25616e-10 | 1.000000 | 1.25616e-10 | 1.000000 |
| rad56          | 1.14730e-10 | 1.000000 | 1.14730e-10 | 1.000000 |
| rad65          | 1.12924e-10 | 1.000000 | 1.12924e-10 | 1.000000 |
| rad53          | 1.02284e-10 | 1.000000 | 1.02284e-10 | 1.000000 |
| rad42          | 8.16162e-11 | 1.000000 | 8.16162e-11 | 1.000000 |
| rad64          | 5.30450e-11 | 1.000000 | 5.30450e-11 | 1.000000 |
| rad72          | 6.67572e-12 | 1.000000 | 6.67572e-12 | 1.000000 |

100000000. Pa, 600.000000 K

| Rate constant             | True (fraction)        | Effective (fraction)   |
|---------------------------|------------------------|------------------------|
| Total                     | 4.35570e-13 (1.00 )    | 4.35565e-13 (1.00 )    |
| Formation of rad19        | 4.18892e-13 (0.962 )   | 4.18886e-13 (0.962 )   |
| H-abstraction to cyc2enyl | 1.54751e-14 (0.0355 )  | 1.54751e-14 (0.0355 )  |
| H-abstraction to cyclenyl | 1.20343e-15 (0.00276 ) | 1.20342e-15 (0.00276 ) |

| species                       | PYtrue      | Cumul    | PYeffective | Cumul    |
|-------------------------------|-------------|----------|-------------|----------|
| rad9                          | 0.851854    | 0.851854 | 0.851865    | 0.851865 |
| Benzene+cycloprop-2-enylidene | 0.0355285   | 0.887382 | 0.0355289   | 0.887394 |
| rad19anti                     | 0.0345179   | 0.921900 | 0.0345184   | 0.921912 |
| Indene+H                      | 0.0253508   | 0.947251 | 0.0253512   | 0.947263 |
| PhCHCCH2+H                    | 0.0201418   | 0.967393 | 0.0201421   | 0.967405 |
| rad15                         | 0.00888907  | 0.976282 | 0.00888918  | 0.976295 |
| PhcycC3H3_B+H                 | 0.00817738  | 0.984459 | 0.00817748  | 0.984472 |
| PhcycC3H3_A+H                 | 0.00710161  | 0.991561 | 0.00710170  | 0.991574 |
| Benzene+cycloprop-1-enylidene | 0.00276289  | 0.994324 | 0.00276289  | 0.994337 |
| C2H2+PhCH2                    | 0.000655392 | 0.994979 | 0.000655400 | 0.994992 |
| rad19syn                      | 0.000639944 | 0.995619 | 0.000639952 | 0.995632 |
| Ph+MeAc                       | 0.000637674 | 0.996257 | 0.000637682 | 0.996270 |
| rad8                          | 0.000619494 | 0.996876 | 0.000619502 | 0.996889 |

|                |             |          |             |          |
|----------------|-------------|----------|-------------|----------|
| PhCH2CCH+H     | 0.000493794 | 0.997370 | 0.000493801 | 0.997383 |
| Ph+Allene      | 0.000422775 | 0.997793 | 0.000422780 | 0.997806 |
| rad6           | 0.000347283 | 0.998140 | 0.000347287 | 0.998153 |
| rad12          | 0.000337565 | 0.998478 | 0.000337569 | 0.998491 |
| rad67          | 0.000248909 | 0.998726 | 0.000248912 | 0.998740 |
| PhCCCH3+H      | 0.000221938 | 0.998948 | 0.000221941 | 0.998961 |
| rad45          | 0.000171308 | 0.999120 | 0.000171310 | 0.999133 |
| rad11          | 0.000165049 | 0.999285 | 0.000165051 | 0.999298 |
| PhCCH+CH3      | 0.000156261 | 0.999441 | 0.000156263 | 0.999454 |
| rad2           | 0.000106793 | 0.999548 | 0.000106794 | 0.999561 |
| rad26          | 0.000101252 | 0.999649 | 0.000101253 | 0.999662 |
| rad35          | 8.88233e-05 | 0.999738 | 8.88244e-05 | 0.999751 |
| rad22          | 4.15250e-05 | 0.999779 | 4.15255e-05 | 0.999793 |
| rad23          | 3.85750e-05 | 0.999818 | 3.85755e-05 | 0.999831 |
| rad1           | 3.59617e-05 | 0.999854 | 3.59622e-05 | 0.999867 |
| rad10          | 3.39894e-05 | 0.999888 | 3.39897e-05 | 0.999901 |
| rad36          | 1.62377e-05 | 0.999904 | 1.62379e-05 | 0.999917 |
| PAH10+CH3      | 1.49304e-05 | 0.999919 | 1.49306e-05 | 0.999932 |
| rad21          | 1.46228e-05 | 0.999934 | 1.46230e-05 | 0.999947 |
| Phenyl+cycC3H4 | 1.21067e-05 | 0.999946 | 0.00000     | 0.999947 |
| PAH3+H         | 7.85212e-06 | 0.999954 | 7.85221e-06 | 0.999955 |
| rad20          | 7.83953e-06 | 0.999962 | 7.83962e-06 | 0.999963 |
| rad37          | 6.37710e-06 | 0.999968 | 6.37717e-06 | 0.999969 |
| rad18          | 6.27865e-06 | 0.999974 | 6.27872e-06 | 0.999975 |
| rad7           | 5.68693e-06 | 0.999980 | 5.68700e-06 | 0.999981 |
| PAH7+H         | 4.12675e-06 | 0.999984 | 4.12680e-06 | 0.999985 |
| rad30          | 3.87047e-06 | 0.999988 | 3.87052e-06 | 0.999989 |
| rad28          | 2.20930e-06 | 0.999990 | 2.20933e-06 | 0.999991 |
| rad38          | 1.63490e-06 | 0.999992 | 1.63492e-06 | 0.999993 |
| rad5           | 1.60296e-06 | 0.999993 | 1.60298e-06 | 0.999994 |
| rad3           | 8.60221e-07 | 0.999994 | 8.60233e-07 | 0.999995 |
| rad59          | 7.14892e-07 | 0.999995 | 7.14901e-07 | 0.999996 |
| rad4           | 7.10166e-07 | 0.999996 | 7.10174e-07 | 0.999997 |
| PAH9+H         | 5.82705e-07 | 0.999996 | 5.82712e-07 | 0.999997 |
| rad60syn       | 5.15500e-07 | 0.999997 | 5.15506e-07 | 0.999998 |
| rad25          | 3.41238e-07 | 0.999997 | 3.41242e-07 | 0.999998 |
| rad13          | 3.37562e-07 | 0.999997 | 3.37566e-07 | 0.999998 |
| rad60anti      | 3.26392e-07 | 0.999998 | 3.26397e-07 | 0.999999 |
| PAH1+H         | 3.08204e-07 | 0.999998 | 3.08207e-07 | 0.999999 |
| rad39          | 2.83065e-07 | 0.999998 | 2.83068e-07 | 0.999999 |
| rad70          | 1.76219e-07 | 0.999998 | 1.76221e-07 | 0.999999 |
| rad43          | 1.63154e-07 | 0.999999 | 1.63156e-07 | 1.000000 |
| rad50          | 1.46334e-07 | 0.999999 | 1.46335e-07 | 1.000000 |
| rad46          | 1.28566e-07 | 0.999999 | 1.28568e-07 | 1.000000 |
| rad24          | 1.28066e-07 | 0.999999 | 1.28068e-07 | 1.000000 |
| rad27          | 1.13538e-07 | 0.999999 | 1.13539e-07 | 1.000000 |
| rad58          | 9.66027e-08 | 0.999999 | 9.66046e-08 | 1.000000 |
| rad34          | 4.85042e-08 | 0.999999 | 4.85047e-08 | 1.000000 |
| rad51          | 4.61139e-08 | 0.999999 | 4.61145e-08 | 1.000000 |
| rad47          | 4.11794e-08 | 0.999999 | 4.11800e-08 | 1.000000 |
| rad54          | 3.41557e-08 | 0.999999 | 3.41561e-08 | 1.000000 |
| rad61          | 3.18529e-08 | 0.999999 | 3.18533e-08 | 1.000000 |
| PAH8+H         | 2.48326e-08 | 0.999999 | 2.48328e-08 | 1.000000 |
| rad41          | 1.47905e-08 | 1.000000 | 1.47906e-08 | 1.000000 |
| rad52          | 1.28899e-08 | 1.000000 | 1.28901e-08 | 1.000000 |
| rad33          | 1.15861e-08 | 1.000000 | 1.15863e-08 | 1.000000 |
| rad31          | 1.04192e-08 | 1.000000 | 1.04192e-08 | 1.000000 |
| rad14          | 8.00661e-09 | 1.000000 | 8.00670e-09 | 1.000000 |
| rad62          | 5.81448e-09 | 1.000000 | 5.81455e-09 | 1.000000 |
| rad68syn       | 4.37589e-09 | 1.000000 | 4.37595e-09 | 1.000000 |
| rad40syn       | 3.68944e-09 | 1.000000 | 3.68949e-09 | 1.000000 |
| rad40anti      | 2.97176e-09 | 1.000000 | 2.97179e-09 | 1.000000 |
| rad68anti      | 2.84264e-09 | 1.000000 | 2.84267e-09 | 1.000000 |
| rad55          | 2.69879e-09 | 1.000000 | 2.69882e-09 | 1.000000 |
| rad56          | 1.07329e-09 | 1.000000 | 1.07330e-09 | 1.000000 |
| rad71          | 1.02081e-09 | 1.000000 | 1.02082e-09 | 1.000000 |
| rad53          | 9.39249e-10 | 1.000000 | 9.39260e-10 | 1.000000 |
| rad65          | 9.20583e-10 | 1.000000 | 9.20594e-10 | 1.000000 |
| rad73          | 7.92331e-10 | 1.000000 | 7.92340e-10 | 1.000000 |
| rad42          | 5.56233e-10 | 1.000000 | 5.56240e-10 | 1.000000 |
| rad64          | 5.27837e-10 | 1.000000 | 5.27843e-10 | 1.000000 |
| rad72          | 3.02984e-11 | 1.000000 | 3.02988e-11 | 1.000000 |

100000000. Pa, 700.000000 K

| Rate constant             | True (fraction)      | Effective (fraction) |
|---------------------------|----------------------|----------------------|
| Total                     | 6.91694e-13 (1.00)   | 6.91528e-13 (1.00)   |
| Formation of rad19        | 6.47922e-13 (0.937)  | 6.47758e-13 (0.937)  |
| H-abstraction to cyc2enyl | 3.91858e-14 (0.0567) | 3.91858e-14 (0.0567) |

H-abstraction to cyclenyl | 4.58543e-15 (0.00663 ) 4.58426e-15 (0.00663 )

| species                       | PYtrue      | Cumul    | PYeffective | Cumul    |
|-------------------------------|-------------|----------|-------------|----------|
| rad9                          | 0.789527    | 0.789527 | 0.789717    | 0.789717 |
| Benzene+cycloprop-2-enylidene | 0.0566520   | 0.846179 | 0.0566656   | 0.846382 |
| Indene+H                      | 0.0463437   | 0.892523 | 0.0463548   | 0.892737 |
| PhCHCCH2+H                    | 0.0412577   | 0.933781 | 0.0412676   | 0.934005 |
| rad19anti                     | 0.0198389   | 0.953620 | 0.0198435   | 0.953848 |
| PhcycC3H3_B+H                 | 0.0103536   | 0.963973 | 0.0103561   | 0.964204 |
| PhcycC3H3_A+H                 | 0.00888456  | 0.972858 | 0.00888669  | 0.973091 |
| rad15                         | 0.00879760  | 0.981655 | 0.00879970  | 0.981891 |
| Benzene+cycloprop-1-enylidene | 0.00662927  | 0.988285 | 0.00662918  | 0.988520 |
| rad19syn                      | 0.00143310  | 0.989718 | 0.00143344  | 0.989953 |
| C2H2+PhCH2                    | 0.00137811  | 0.991096 | 0.00137845  | 0.991332 |
| Ph+MeAc                       | 0.00125660  | 0.992353 | 0.00125690  | 0.992589 |
| rad12                         | 0.00110058  | 0.993453 | 0.00110084  | 0.993689 |
| PhCH2CCH+H                    | 0.00109114  | 0.994544 | 0.00109140  | 0.994781 |
| Ph+Allene                     | 0.000932058 | 0.995476 | 0.000932280 | 0.995713 |
| rad6                          | 0.000691740 | 0.996168 | 0.000691905 | 0.996405 |
| rad67                         | 0.000536273 | 0.996704 | 0.000536401 | 0.996941 |
| rad8                          | 0.000515108 | 0.997219 | 0.000515231 | 0.997457 |
| PhCCCH3+H                     | 0.000436702 | 0.997656 | 0.000436806 | 0.997893 |
| rad45                         | 0.000364455 | 0.998021 | 0.000364542 | 0.998258 |
| PhCCH+CH3                     | 0.000327224 | 0.998348 | 0.000327303 | 0.998585 |
| rad2                          | 0.000314905 | 0.998663 | 0.000314980 | 0.998900 |
| Phenyl+cycC3H4                | 0.000237530 | 0.998900 | 0.000000    | 0.998900 |
| rad11                         | 0.000217225 | 0.999117 | 0.000217277 | 0.999117 |
| rad35                         | 0.000191494 | 0.999309 | 0.000191540 | 0.999309 |
| rad26                         | 0.000180430 | 0.999489 | 0.000180472 | 0.999490 |
| rad1                          | 0.000104326 | 0.999594 | 0.000104351 | 0.999594 |
| rad23                         | 7.07479e-05 | 0.999664 | 7.07649e-05 | 0.999665 |
| rad10                         | 6.40320e-05 | 0.999729 | 6.40473e-05 | 0.999729 |
| rad22                         | 6.10333e-05 | 0.999790 | 6.10479e-05 | 0.999790 |
| rad36                         | 3.90511e-05 | 0.999829 | 3.90603e-05 | 0.999829 |
| PAH10+CH3                     | 3.78420e-05 | 0.999866 | 3.78511e-05 | 0.999867 |
| rad21                         | 2.37747e-05 | 0.999890 | 2.37804e-05 | 0.999890 |
| PAH3+H                        | 1.84853e-05 | 0.999909 | 1.84897e-05 | 0.999909 |
| rad37                         | 1.56070e-05 | 0.999924 | 1.56107e-05 | 0.999925 |
| rad7                          | 1.28570e-05 | 0.999937 | 1.28601e-05 | 0.999937 |
| rad20                         | 1.17019e-05 | 0.999949 | 1.17047e-05 | 0.999949 |
| PAH7+H                        | 9.91742e-06 | 0.999959 | 9.91980e-06 | 0.999959 |
| rad30                         | 8.58489e-06 | 0.999967 | 8.58695e-06 | 0.999968 |
| rad18                         | 7.71610e-06 | 0.999975 | 7.71795e-06 | 0.999975 |
| rad28                         | 4.63016e-06 | 0.999980 | 4.63128e-06 | 0.999980 |
| rad38                         | 3.88432e-06 | 0.999984 | 3.88525e-06 | 0.999984 |
| rad3                          | 2.05476e-06 | 0.999986 | 2.05525e-06 | 0.999986 |
| rad5                          | 1.83898e-06 | 0.999987 | 1.83942e-06 | 0.999988 |
| rad4                          | 1.67898e-06 | 0.999989 | 1.67939e-06 | 0.999989 |
| rad59                         | 1.66948e-06 | 0.999991 | 1.66987e-06 | 0.999991 |
| PAH9+H                        | 1.38544e-06 | 0.999992 | 1.38576e-06 | 0.999992 |
| rad60syn                      | 1.18207e-06 | 0.999993 | 1.18236e-06 | 0.999994 |
| PAH1+H                        | 7.73229e-07 | 0.999994 | 7.73413e-07 | 0.999994 |
| rad60anti                     | 7.49889e-07 | 0.999995 | 7.50069e-07 | 0.999995 |
| rad39                         | 7.16797e-07 | 0.999996 | 7.16968e-07 | 0.999996 |
| rad13                         | 6.60957e-07 | 0.999996 | 6.61115e-07 | 0.999997 |
| rad25                         | 4.75074e-07 | 0.999997 | 4.75188e-07 | 0.999997 |
| rad24                         | 4.65647e-07 | 0.999997 | 4.65758e-07 | 0.999997 |
| rad70                         | 4.12671e-07 | 0.999998 | 4.12770e-07 | 0.999998 |
| rad43                         | 3.35431e-07 | 0.999998 | 3.35511e-07 | 0.999998 |
| rad50                         | 2.80145e-07 | 0.999998 | 2.80213e-07 | 0.999998 |
| rad46                         | 2.45878e-07 | 0.999999 | 2.45937e-07 | 0.999999 |
| rad58                         | 2.33849e-07 | 0.999999 | 2.33905e-07 | 0.999999 |
| rad27                         | 1.93228e-07 | 0.999999 | 1.93275e-07 | 0.999999 |
| rad31                         | 1.70670e-07 | 0.999999 | 1.70711e-07 | 0.999999 |
| rad47                         | 1.19418e-07 | 0.999999 | 1.19446e-07 | 0.999999 |
| rad34                         | 1.15206e-07 | 0.999999 | 1.15233e-07 | 1.000000 |
| rad54                         | 9.28527e-08 | 0.999999 | 9.28749e-08 | 1.000000 |
| rad51                         | 8.74588e-08 | 1.000000 | 8.74797e-08 | 1.000000 |
| rad61                         | 8.34645e-08 | 1.000000 | 8.34845e-08 | 1.000000 |
| PAH8+H                        | 5.93791e-08 | 1.000000 | 5.93933e-08 | 1.000000 |
| rad41                         | 3.09094e-08 | 1.000000 | 3.09168e-08 | 1.000000 |
| rad33                         | 2.84161e-08 | 1.000000 | 2.84229e-08 | 1.000000 |
| rad52                         | 2.44041e-08 | 1.000000 | 2.44099e-08 | 1.000000 |
| rad14                         | 1.35080e-08 | 1.000000 | 1.35112e-08 | 1.000000 |
| rad62                         | 1.17213e-08 | 1.000000 | 1.17240e-08 | 1.000000 |
| rad68syn                      | 1.08257e-08 | 1.000000 | 1.08283e-08 | 1.000000 |
| rad40syn                      | 8.55421e-09 | 1.000000 | 8.55626e-09 | 1.000000 |
| rad55                         | 7.38989e-09 | 1.000000 | 7.39165e-09 | 1.000000 |
| rad68anti                     | 7.02880e-09 | 1.000000 | 7.03048e-09 | 1.000000 |

|           |             |          |             |          |
|-----------|-------------|----------|-------------|----------|
| rad40anti | 6.77083e-09 | 1.000000 | 6.77245e-09 | 1.000000 |
| rad56     | 3.06332e-09 | 1.000000 | 3.06406e-09 | 1.000000 |
| rad53     | 2.64529e-09 | 1.000000 | 2.64593e-09 | 1.000000 |
| rad65     | 2.26652e-09 | 1.000000 | 2.26707e-09 | 1.000000 |
| rad71     | 1.71034e-09 | 1.000000 | 1.71074e-09 | 1.000000 |
| rad64     | 1.49037e-09 | 1.000000 | 1.49073e-09 | 1.000000 |
| rad73     | 1.34150e-09 | 1.000000 | 1.34182e-09 | 1.000000 |
| rad42     | 1.13359e-09 | 1.000000 | 1.13386e-09 | 1.000000 |
| rad72     | 5.03934e-11 | 1.000000 | 5.04055e-11 | 1.000000 |

100000000. Pa, 800.000000 K

| Rate constant             | True (fraction)       | Effective (fraction)  |
|---------------------------|-----------------------|-----------------------|
| Total                     | 1.03759e-12 (1.00 )   | 1.03689e-12 (1.00 )   |
| Formation of rad19        | 9.41065e-13 (0.907 )  | 9.40382e-13 (0.907 )  |
| H-abstraction to cyc2enyl | 8.32953e-14 (0.0803 ) | 8.32953e-14 (0.0803 ) |
| H-abstraction to cyclenyl | 1.32261e-14 (0.0127 ) | 1.32165e-14 (0.0127 ) |

| species                       | PYtrue      | Cumul    | PYeffective | Cumul    |
|-------------------------------|-------------|----------|-------------|----------|
| rad9                          | 0.766809    | 0.766809 | 0.767321    | 0.767321 |
| Benzene+cycloprop-2-enylidene | 0.0802780   | 0.847087 | 0.0803316   | 0.847653 |
| Indene+H                      | 0.0411568   | 0.888244 | 0.0411843   | 0.888837 |
| PhCHCCH2+H                    | 0.0385897   | 0.926834 | 0.0386155   | 0.927453 |
| rad19anti                     | 0.0192244   | 0.946058 | 0.0192373   | 0.946690 |
| Benzene+cycloprop-1-enylidene | 0.0127470   | 0.958805 | 0.0127462   | 0.959436 |
| PhcycC3H3_B+H                 | 0.0112674   | 0.970073 | 0.0112749   | 0.970711 |
| PhcycC3H3_A+H                 | 0.00959335  | 0.979666 | 0.00959977  | 0.980311 |
| rad15                         | 0.00536361  | 0.985029 | 0.00536718  | 0.985678 |
| rad12                         | 0.00401958  | 0.989049 | 0.00402226  | 0.989701 |
| rad19syn                      | 0.00166164  | 0.990711 | 0.00166275  | 0.991363 |
| C2H2+PhCH2                    | 0.00129096  | 0.992002 | 0.00129183  | 0.992655 |
| Ph+MeAc                       | 0.00111347  | 0.993115 | 0.00111422  | 0.993769 |
| PhCH2CCH+H                    | 0.00104427  | 0.994159 | 0.00104497  | 0.994814 |
| Ph+Allene                     | 0.000895938 | 0.995055 | 0.000896536 | 0.995711 |
| rad8                          | 0.000680480 | 0.995736 | 0.000680934 | 0.996392 |
| Phenyl+cycC3H4                | 0.000658211 | 0.996394 | 0.000000    | 0.996392 |
| rad6                          | 0.000649684 | 0.997044 | 0.000650118 | 0.997042 |
| rad67                         | 0.000512832 | 0.997557 | 0.000513174 | 0.997555 |
| rad2                          | 0.000391327 | 0.997948 | 0.000391589 | 0.997947 |
| PhCCCH3+H                     | 0.000387516 | 0.998335 | 0.000387775 | 0.998334 |
| rad45                         | 0.000343482 | 0.998679 | 0.000343712 | 0.998678 |
| PhCCH+CH3                     | 0.000285531 | 0.998964 | 0.000285722 | 0.998964 |
| rad35                         | 0.000183170 | 0.999148 | 0.000183292 | 0.999147 |
| rad11                         | 0.000170535 | 0.999318 | 0.000170648 | 0.999318 |
| rad26                         | 0.000146922 | 0.999465 | 0.000147020 | 0.999465 |
| rad1                          | 0.000139531 | 0.999605 | 0.000139624 | 0.999604 |
| rad23                         | 5.96982e-05 | 0.999664 | 5.97381e-05 | 0.999664 |
| rad22                         | 5.69267e-05 | 0.999721 | 5.69648e-05 | 0.999721 |
| rad10                         | 5.40269e-05 | 0.999775 | 5.40629e-05 | 0.999775 |
| rad36                         | 4.08539e-05 | 0.999816 | 4.08811e-05 | 0.999816 |
| rad21                         | 3.85493e-05 | 0.999855 | 3.85750e-05 | 0.999855 |
| PAH10+CH3                     | 3.51833e-05 | 0.999890 | 3.52068e-05 | 0.999890 |
| PAH3+H                        | 1.82436e-05 | 0.999908 | 1.82558e-05 | 0.999908 |
| rad20                         | 1.45020e-05 | 0.999923 | 1.45117e-05 | 0.999923 |
| rad37                         | 1.43259e-05 | 0.999937 | 1.43354e-05 | 0.999937 |
| rad7                          | 1.38981e-05 | 0.999951 | 1.39075e-05 | 0.999951 |
| PAH7+H                        | 9.46383e-06 | 0.999960 | 9.47017e-06 | 0.999960 |
| rad30                         | 8.27052e-06 | 0.999969 | 8.27605e-06 | 0.999969 |
| rad18                         | 6.32367e-06 | 0.999975 | 6.32790e-06 | 0.999975 |
| rad28                         | 4.08828e-06 | 0.999979 | 4.09102e-06 | 0.999979 |
| rad38                         | 3.56651e-06 | 0.999982 | 3.56889e-06 | 0.999983 |
| rad24                         | 2.21185e-06 | 0.999985 | 2.21333e-06 | 0.999985 |
| rad3                          | 1.98611e-06 | 0.999987 | 1.98744e-06 | 0.999987 |
| rad4                          | 1.64580e-06 | 0.999988 | 1.64690e-06 | 0.999988 |
| rad59                         | 1.64210e-06 | 0.999990 | 1.64320e-06 | 0.999990 |
| rad5                          | 1.41067e-06 | 0.999991 | 1.41162e-06 | 0.999992 |
| PAH9+H                        | 1.36198e-06 | 0.999993 | 1.36289e-06 | 0.999993 |
| rad60syn                      | 1.15406e-06 | 0.999994 | 1.15484e-06 | 0.999994 |
| rad60anti                     | 7.32695e-07 | 0.999995 | 7.33185e-07 | 0.999995 |
| rad13                         | 7.25954e-07 | 0.999995 | 7.26438e-07 | 0.999995 |
| PAH1+H                        | 7.24243e-07 | 0.999996 | 7.24727e-07 | 0.999996 |
| rad39                         | 6.90438e-07 | 0.999997 | 6.90900e-07 | 0.999997 |
| rad25                         | 4.52006e-07 | 0.999997 | 4.52307e-07 | 0.999997 |
| rad70                         | 4.00771e-07 | 0.999998 | 4.01039e-07 | 0.999998 |
| rad31                         | 3.49940e-07 | 0.999998 | 3.50174e-07 | 0.999998 |
| rad43                         | 2.99739e-07 | 0.999998 | 2.99939e-07 | 0.999998 |
| rad50                         | 2.46355e-07 | 0.999999 | 2.46520e-07 | 0.999999 |
| rad58                         | 2.33513e-07 | 0.999999 | 2.33668e-07 | 0.999999 |

|           |             |          |             |          |
|-----------|-------------|----------|-------------|----------|
| rad46     | 2.14384e-07 | 0.999999 | 2.14527e-07 | 0.999999 |
| rad27     | 2.03694e-07 | 0.999999 | 2.03830e-07 | 0.999999 |
| rad47     | 1.27109e-07 | 0.999999 | 1.27194e-07 | 0.999999 |
| rad34     | 1.12514e-07 | 0.999999 | 1.12589e-07 | 1.000000 |
| rad54     | 1.03189e-07 | 1.000000 | 1.03258e-07 | 1.000000 |
| rad51     | 7.88009e-08 | 1.000000 | 7.88535e-08 | 1.000000 |
| rad61     | 7.86358e-08 | 1.000000 | 7.86884e-08 | 1.000000 |
| PAH8+H    | 5.76939e-08 | 1.000000 | 5.77324e-08 | 1.000000 |
| rad33     | 5.45834e-08 | 1.000000 | 5.46198e-08 | 1.000000 |
| rad41     | 2.77689e-08 | 1.000000 | 2.77875e-08 | 1.000000 |
| rad52     | 2.19057e-08 | 1.000000 | 2.19204e-08 | 1.000000 |
| rad14     | 1.16482e-08 | 1.000000 | 1.16559e-08 | 1.000000 |
| rad68syn  | 1.07537e-08 | 1.000000 | 1.07609e-08 | 1.000000 |
| rad62     | 1.06507e-08 | 1.000000 | 1.06578e-08 | 1.000000 |
| rad55     | 8.25335e-09 | 1.000000 | 8.25886e-09 | 1.000000 |
| rad40syn  | 8.16930e-09 | 1.000000 | 8.17476e-09 | 1.000000 |
| rad68anti | 6.98050e-09 | 1.000000 | 6.98516e-09 | 1.000000 |
| rad40anti | 6.39543e-09 | 1.000000 | 6.39970e-09 | 1.000000 |
| rad56     | 3.52380e-09 | 1.000000 | 3.52615e-09 | 1.000000 |
| rad53     | 3.01381e-09 | 1.000000 | 3.01582e-09 | 1.000000 |
| rad65     | 2.28163e-09 | 1.000000 | 2.28316e-09 | 1.000000 |
| rad71     | 1.51854e-09 | 1.000000 | 1.51956e-09 | 1.000000 |
| rad64     | 1.48792e-09 | 1.000000 | 1.48891e-09 | 1.000000 |
| rad73     | 1.18211e-09 | 1.000000 | 1.18289e-09 | 1.000000 |
| rad42     | 1.03900e-09 | 1.000000 | 1.03970e-09 | 1.000000 |
| rad72     | 4.54443e-11 | 1.000000 | 4.54746e-11 | 1.000000 |

10000000. Pa, 900.00000 K

| Rate constant             | True (fraction)       | Effective (fraction)  |
|---------------------------|-----------------------|-----------------------|
| Total                     | 1.49199e-12 (1.00 )   | 1.49072e-12 (1.00 )   |
| Formation of rad19        | 1.30395e-12 (0.874 )  | 1.30271e-12 (0.874 )  |
| H-abstraction to cyc2enyl | 1.56554e-13 (0.105 )  | 1.56554e-13 (0.105 )  |
| H-abstraction to cyclenyl | 3.14892e-14 (0.0211 ) | 3.14591e-14 (0.0211 ) |

| species                       | PYtrue      | Cumul    | PYeffective | Cumul    |
|-------------------------------|-------------|----------|-------------|----------|
| rad9                          | 0.774081    | 0.774081 | 0.774743    | 0.774743 |
| Benzene+cycloprop-2-enylidene | 0.104929    | 0.879011 | 0.105019    | 0.879762 |
| Indene+H                      | 0.0219763   | 0.900987 | 0.0219951   | 0.901757 |
| Benzene+cycloprop-1-enylidene | 0.0211054   | 0.922093 | 0.0211033   | 0.922861 |
| PhCHCCH2+H                    | 0.0206278   | 0.942720 | 0.0206454   | 0.943506 |
| rad19anti                     | 0.0182986   | 0.961019 | 0.0183144   | 0.961820 |
| PhcycC3H3_B+H                 | 0.0114272   | 0.972446 | 0.0114370   | 0.973257 |
| PhcycC3H3_A+H                 | 0.00969175  | 0.982138 | 0.00970004  | 0.982957 |
| rad12                         | 0.00725011  | 0.989388 | 0.00725631  | 0.990214 |
| rad15                         | 0.00265123  | 0.992039 | 0.00265350  | 0.992867 |
| rad19syn                      | 0.00161924  | 0.993659 | 0.00162062  | 0.994488 |
| rad8                          | 0.00123621  | 0.994895 | 0.00123727  | 0.995725 |
| Phenyl+cycC3H4                | 0.000834548 | 0.995729 | 0.000000    | 0.995725 |
| C2H2+PhCH2                    | 0.000667458 | 0.996397 | 0.000668029 | 0.996393 |
| Ph+MeAc                       | 0.000585352 | 0.996982 | 0.000585854 | 0.996979 |
| PhCH2CCH+H                    | 0.000555638 | 0.997538 | 0.000556114 | 0.997535 |
| Ph+Allene                     | 0.000483795 | 0.998022 | 0.000484209 | 0.998019 |
| rad6                          | 0.000359375 | 0.998381 | 0.000359683 | 0.998379 |
| rad67                         | 0.000277936 | 0.998659 | 0.000278173 | 0.998657 |
| rad2                          | 0.000222577 | 0.998881 | 0.000222767 | 0.998880 |
| PhCCCH3+H                     | 0.000202672 | 0.999084 | 0.000202845 | 0.999083 |
| rad45                         | 0.000179137 | 0.999263 | 0.000179290 | 0.999262 |
| PhCCH+CH3                     | 0.000135519 | 0.999399 | 0.000135635 | 0.999398 |
| rad35                         | 9.92754e-05 | 0.999498 | 9.93599e-05 | 0.999497 |
| rad11                         | 9.04073e-05 | 0.999588 | 9.04848e-05 | 0.999588 |
| rad1                          | 8.56889e-05 | 0.999674 | 8.57622e-05 | 0.999673 |
| rad26                         | 6.49646e-05 | 0.999739 | 6.50202e-05 | 0.999738 |
| rad21                         | 6.11885e-05 | 0.999800 | 6.12408e-05 | 0.999800 |
| rad22                         | 3.54988e-05 | 0.999836 | 3.55292e-05 | 0.999835 |
| rad23                         | 2.82175e-05 | 0.999864 | 2.82416e-05 | 0.999863 |
| rad10                         | 2.45221e-05 | 0.999889 | 2.45430e-05 | 0.999888 |
| rad36                         | 2.02650e-05 | 0.999909 | 2.02823e-05 | 0.999908 |
| PAH10+CH3                     | 1.73643e-05 | 0.999926 | 1.73792e-05 | 0.999926 |
| rad20                         | 1.61004e-05 | 0.999942 | 1.61142e-05 | 0.999942 |
| rad7                          | 1.01292e-05 | 0.999952 | 1.01378e-05 | 0.999952 |
| PAH3+H                        | 9.92763e-06 | 0.999962 | 9.93607e-06 | 0.999962 |
| rad37                         | 7.00064e-06 | 0.999969 | 7.00664e-06 | 0.999969 |
| rad24                         | 5.46256e-06 | 0.999975 | 5.46724e-06 | 0.999974 |
| PAH7+H                        | 4.86740e-06 | 0.999980 | 4.87157e-06 | 0.999979 |
| rad30                         | 4.46109e-06 | 0.999984 | 4.46491e-06 | 0.999984 |
| rad18                         | 3.70456e-06 | 0.999988 | 3.70773e-06 | 0.999987 |
| rad28                         | 1.94805e-06 | 0.999990 | 1.94972e-06 | 0.999989 |

|           |             |          |             |          |
|-----------|-------------|----------|-------------|----------|
| rad38     | 1.75734e-06 | 0.999992 | 1.75884e-06 | 0.999991 |
| rad3      | 1.09954e-06 | 0.999993 | 1.10048e-06 | 0.999992 |
| rad4      | 8.94005e-07 | 0.999994 | 8.94772e-07 | 0.999993 |
| rad59     | 8.92240e-07 | 0.999994 | 8.93007e-07 | 0.999994 |
| rad5      | 7.38137e-07 | 0.999995 | 7.38768e-07 | 0.999995 |
| PAH9+H    | 7.30363e-07 | 0.999996 | 7.30988e-07 | 0.999995 |
| rad13     | 6.40262e-07 | 0.999997 | 6.40810e-07 | 0.999996 |
| rad60syn  | 6.25222e-07 | 0.999997 | 6.25756e-07 | 0.999997 |
| rad60anti | 3.97059e-07 | 0.999998 | 3.97399e-07 | 0.999997 |
| rad25     | 3.65935e-07 | 0.999998 | 3.66248e-07 | 0.999997 |
| PAH1+H    | 3.65887e-07 | 0.999998 | 3.66200e-07 | 0.999998 |
| rad39     | 3.63635e-07 | 0.999999 | 3.63946e-07 | 0.999998 |
| rad31     | 2.25419e-07 | 0.999999 | 2.25612e-07 | 0.999998 |
| rad70     | 2.10182e-07 | 0.999999 | 2.10362e-07 | 0.999999 |
| rad43     | 1.55804e-07 | 0.999999 | 1.55938e-07 | 0.999999 |
| rad27     | 1.52945e-07 | 0.999999 | 1.53075e-07 | 0.999999 |
| rad58     | 1.27780e-07 | 1.000000 | 1.27889e-07 | 0.999999 |
| rad50     | 1.26144e-07 | 1.000000 | 1.26252e-07 | 0.999999 |
| rad46     | 1.08581e-07 | 1.000000 | 1.08674e-07 | 0.999999 |
| rad33     | 9.59483e-08 | 1.000000 | 9.60304e-08 | 0.999999 |
| rad47     | 6.62456e-08 | 1.000000 | 6.63023e-08 | 0.999999 |
| rad54     | 6.60454e-08 | 1.000000 | 6.61019e-08 | 0.999999 |
| rad34     | 5.90702e-08 | 1.000000 | 5.91207e-08 | 1.000000 |
| rad51     | 4.00223e-08 | 1.000000 | 4.00564e-08 | 1.000000 |
| rad61     | 3.92670e-08 | 1.000000 | 3.93005e-08 | 1.000000 |
| PAH8+H    | 3.05342e-08 | 1.000000 | 3.05603e-08 | 1.000000 |
| rad41     | 1.45060e-08 | 1.000000 | 1.45183e-08 | 1.000000 |
| rad52     | 1.10941e-08 | 1.000000 | 1.11037e-08 | 1.000000 |
| rad14     | 6.59162e-09 | 1.000000 | 6.59726e-09 | 1.000000 |
| rad62     | 5.73852e-09 | 1.000000 | 5.74342e-09 | 1.000000 |
| rad68syn  | 5.67150e-09 | 1.000000 | 5.67635e-09 | 1.000000 |
| rad55     | 5.29850e-09 | 1.000000 | 5.30303e-09 | 1.000000 |
| rad40syn  | 4.31325e-09 | 1.000000 | 4.31695e-09 | 1.000000 |
| rad68anti | 3.68124e-09 | 1.000000 | 3.68439e-09 | 1.000000 |
| rad40anti | 3.37656e-09 | 1.000000 | 3.37945e-09 | 1.000000 |
| rad56     | 2.30486e-09 | 1.000000 | 2.30683e-09 | 1.000000 |
| rad53     | 1.95921e-09 | 1.000000 | 1.96088e-09 | 1.000000 |
| rad65     | 1.24484e-09 | 1.000000 | 1.24590e-09 | 1.000000 |
| rad71     | 8.00854e-10 | 1.000000 | 8.01540e-10 | 1.000000 |
| rad64     | 8.00759e-10 | 1.000000 | 8.01444e-10 | 1.000000 |
| rad73     | 6.19007e-10 | 1.000000 | 6.19536e-10 | 1.000000 |
| rad42     | 5.64725e-10 | 1.000000 | 5.65208e-10 | 1.000000 |
| rad72     | 2.42766e-11 | 1.000000 | 2.42974e-11 | 1.000000 |

100000000. Pa, 1000.00000 K

| Rate constant             | True (fraction)       | Effective (fraction)  |
|---------------------------|-----------------------|-----------------------|
| Total                     | 2.07591e-12 (1.00 )   | 2.07409e-12 (1.00 )   |
| Formation of rad19        | 1.74189e-12 (0.839 )  | 1.74014e-12 (0.839 )  |
| H-abstraction to cyc2enyl | 2.68753e-13 (0.129 )  | 2.68753e-13 (0.130 )  |
| H-abstraction to cyclenyl | 6.52627e-14 (0.0314 ) | 6.51972e-14 (0.0314 ) |

| species                       | PYtrue      | Cumul    | PYeffective | Cumul    |
|-------------------------------|-------------|----------|-------------|----------|
| rad9                          | 0.759344    | 0.759344 | 0.760009    | 0.760009 |
| Benzene+cycloprop-2-enylidene | 0.129463    | 0.888807 | 0.129576    | 0.889585 |
| Benzene+cycloprop-1-enylidene | 0.0314382   | 0.920245 | 0.0314341   | 0.921019 |
| rad19anti                     | 0.0168046   | 0.937050 | 0.0168193   | 0.937839 |
| Indene+H                      | 0.0132484   | 0.950298 | 0.0132601   | 0.951099 |
| PhCHCCH2+H                    | 0.0125049   | 0.962803 | 0.0125158   | 0.963614 |
| PhcycC3H3_B+H                 | 0.0111350   | 0.973938 | 0.0111448   | 0.974759 |
| PhcycC3H3_A+H                 | 0.00943038  | 0.983369 | 0.00943863  | 0.984198 |
| rad12                         | 0.00769287  | 0.991062 | 0.00769961  | 0.991897 |
| rad8                          | 0.00231860  | 0.993380 | 0.00232063  | 0.994218 |
| rad15                         | 0.00165431  | 0.995035 | 0.00165575  | 0.995874 |
| rad19syn                      | 0.00150043  | 0.996535 | 0.00150175  | 0.997376 |
| Phenyl+cycC3H4                | 0.000843143 | 0.997378 | 0.000000    | 0.997376 |
| C2H2+PhCH2                    | 0.000365540 | 0.997744 | 0.000365860 | 0.997741 |
| Ph+MeAc                       | 0.000352510 | 0.998096 | 0.000352819 | 0.998094 |
| PhCH2CCH+H                    | 0.000330533 | 0.998427 | 0.000330822 | 0.998425 |
| Ph+Allene                     | 0.000293529 | 0.998720 | 0.000293786 | 0.998719 |
| rad6                          | 0.000223332 | 0.998944 | 0.000223528 | 0.998942 |
| rad67                         | 0.000170149 | 0.999114 | 0.000170298 | 0.999113 |
| rad2                          | 0.000140578 | 0.999254 | 0.000140701 | 0.999253 |
| PhCCCH3+H                     | 0.000121956 | 0.999376 | 0.000122063 | 0.999375 |
| rad21                         | 0.000105952 | 0.999482 | 0.000106045 | 0.999481 |
| rad45                         | 9.79321e-05 | 0.999580 | 9.80175e-05 | 0.999579 |
| PhCCH+CH3                     | 7.73022e-05 | 0.999657 | 7.73699e-05 | 0.999657 |
| rad11                         | 6.07812e-05 | 0.999718 | 6.08345e-05 | 0.999718 |

|           |             |          |             |          |
|-----------|-------------|----------|-------------|----------|
| rad35     | 6.07698e-05 | 0.999779 | 6.08230e-05 | 0.999779 |
| rad1      | 5.19131e-05 | 0.999831 | 5.19585e-05 | 0.999830 |
| rad26     | 3.34998e-05 | 0.999864 | 3.35291e-05 | 0.999864 |
| rad22     | 2.41196e-05 | 0.999888 | 2.41407e-05 | 0.999888 |
| rad20     | 2.08518e-05 | 0.999909 | 2.08700e-05 | 0.999909 |
| rad23     | 1.47613e-05 | 0.999924 | 1.47742e-05 | 0.999924 |
| rad10     | 1.29323e-05 | 0.999937 | 1.29436e-05 | 0.999937 |
| rad36     | 1.04840e-05 | 0.999948 | 1.04932e-05 | 0.999947 |
| PAH10+CH3 | 1.03799e-05 | 0.999958 | 1.03890e-05 | 0.999958 |
| rad7      | 8.86357e-06 | 0.999967 | 8.87139e-06 | 0.999966 |
| rad24     | 6.80424e-06 | 0.999974 | 6.81020e-06 | 0.999973 |
| PAH3+H    | 6.01331e-06 | 0.999980 | 6.01857e-06 | 0.999979 |
| rad37     | 4.12096e-06 | 0.999984 | 4.12456e-06 | 0.999983 |
| PAH7+H    | 2.80743e-06 | 0.999987 | 2.80989e-06 | 0.999986 |
| rad18     | 2.80107e-06 | 0.999989 | 2.80353e-06 | 0.999989 |
| rad30     | 2.68564e-06 | 0.999992 | 2.68799e-06 | 0.999992 |
| rad28     | 1.06928e-06 | 0.999993 | 1.07021e-06 | 0.999993 |
| rad38     | 1.03134e-06 | 0.999994 | 1.03225e-06 | 0.999994 |
| rad13     | 9.33934e-07 | 0.999995 | 9.34752e-07 | 0.999995 |
| rad3      | 6.75404e-07 | 0.999996 | 6.75996e-07 | 0.999995 |
| rad59     | 5.39848e-07 | 0.999996 | 5.40321e-07 | 0.999996 |
| rad4      | 5.30585e-07 | 0.999997 | 5.31049e-07 | 0.999997 |
| rad25     | 4.88687e-07 | 0.999997 | 4.89114e-07 | 0.999997 |
| rad5      | 4.25403e-07 | 0.999998 | 4.25775e-07 | 0.999997 |
| PAH9+H    | 4.19825e-07 | 0.999998 | 4.20192e-07 | 0.999998 |
| rad60syn  | 3.77492e-07 | 0.999998 | 3.77823e-07 | 0.999998 |
| rad60anti | 2.39784e-07 | 0.999999 | 2.39994e-07 | 0.999998 |
| rad39     | 2.22528e-07 | 0.999999 | 2.22723e-07 | 0.999999 |
| PAH1+H    | 2.20109e-07 | 0.999999 | 2.20301e-07 | 0.999999 |
| rad33     | 2.04676e-07 | 0.999999 | 2.04855e-07 | 0.999999 |
| rad27     | 1.91854e-07 | 1.000000 | 1.92022e-07 | 0.999999 |
| rad31     | 1.38476e-07 | 1.000000 | 1.38598e-07 | 0.999999 |
| rad70     | 1.17939e-07 | 1.000000 | 1.18042e-07 | 1.000000 |
| rad43     | 8.91677e-08 | 1.000000 | 8.92458e-08 | 1.000000 |
| rad58     | 7.77176e-08 | 1.000000 | 7.77856e-08 | 1.000000 |
| rad50     | 7.05333e-08 | 1.000000 | 7.05951e-08 | 1.000000 |
| rad46     | 6.03342e-08 | 1.000000 | 6.03870e-08 | 1.000000 |
| rad54     | 4.43634e-08 | 1.000000 | 4.44023e-08 | 1.000000 |
| rad47     | 3.57323e-08 | 1.000000 | 3.57636e-08 | 1.000000 |
| rad34     | 3.30779e-08 | 1.000000 | 3.31069e-08 | 1.000000 |
| rad61     | 2.38550e-08 | 1.000000 | 2.38759e-08 | 1.000000 |
| rad51     | 2.20993e-08 | 1.000000 | 2.21186e-08 | 1.000000 |
| PAH8+H    | 1.71555e-08 | 1.000000 | 1.71705e-08 | 1.000000 |
| rad41     | 8.29124e-09 | 1.000000 | 8.29850e-09 | 1.000000 |
| rad14     | 6.37471e-09 | 1.000000 | 6.38029e-09 | 1.000000 |
| rad52     | 6.11735e-09 | 1.000000 | 6.12270e-09 | 1.000000 |
| rad55     | 3.56115e-09 | 1.000000 | 3.56427e-09 | 1.000000 |
| rad62     | 3.40818e-09 | 1.000000 | 3.41116e-09 | 1.000000 |
| rad68syn  | 3.16265e-09 | 1.000000 | 3.16542e-09 | 1.000000 |
| rad40syn  | 2.43217e-09 | 1.000000 | 2.43429e-09 | 1.000000 |
| rad68anti | 2.05287e-09 | 1.000000 | 2.05467e-09 | 1.000000 |
| rad40anti | 1.90981e-09 | 1.000000 | 1.91149e-09 | 1.000000 |
| rad56     | 1.55884e-09 | 1.000000 | 1.56019e-09 | 1.000000 |
| rad53     | 1.32188e-09 | 1.000000 | 1.32304e-09 | 1.000000 |
| rad65     | 7.27439e-10 | 1.000000 | 7.28076e-10 | 1.000000 |
| rad64     | 5.09577e-10 | 1.000000 | 5.10023e-10 | 1.000000 |
| rad71     | 4.57785e-10 | 1.000000 | 4.58185e-10 | 1.000000 |
| rad73     | 3.52364e-10 | 1.000000 | 3.52673e-10 | 1.000000 |
| rad42     | 3.36127e-10 | 1.000000 | 3.36421e-10 | 1.000000 |
| rad72     | 1.39799e-11 | 1.000000 | 1.39921e-11 | 1.000000 |

100000000. Pa, 1100.00000 K

| Rate constant             | True (fraction)      | Effective (fraction) |
|---------------------------|----------------------|----------------------|
| Total                     | 2.81236e-12 (1.00)   | 2.80998e-12 (1.00)   |
| Formation of rad19        | 2.25993e-12 (0.804)  | 2.25767e-12 (0.803)  |
| H-abstraction to cyc2enyl | 4.30538e-13 (0.153)  | 4.30538e-13 (0.153)  |
| H-abstraction to cyc1enyl | 1.21896e-13 (0.0433) | 1.21774e-13 (0.0433) |

| species                       | PYtrue     | Cumul    | PYeffective | Cumul    |
|-------------------------------|------------|----------|-------------|----------|
| rad9                          | 0.731738   | 0.731738 | 0.732359    | 0.732359 |
| Benzene+cycloprop-2-enylidene | 0.153088   | 0.884825 | 0.153218    | 0.885576 |
| Benzene+cycloprop-1-enylidene | 0.0433429  | 0.928168 | 0.0433363   | 0.928913 |
| rad19anti                     | 0.0151662  | 0.943334 | 0.0151791   | 0.944092 |
| PhcycC3H3_B+H                 | 0.0106442  | 0.953979 | 0.0106533   | 0.954745 |
| Indene+H                      | 0.0102088  | 0.964187 | 0.0102174   | 0.964963 |
| PhCHCCH2+H                    | 0.00992047 | 0.974108 | 0.00992883  | 0.974891 |
| PhcycC3H3_A+H                 | 0.00901227 | 0.983120 | 0.00901997  | 0.983911 |

|                |             |          |             |          |
|----------------|-------------|----------|-------------|----------|
| rad12          | 0.00742795  | 0.990548 | 0.00743426  | 0.991346 |
| rad8           | 0.00375027  | 0.994298 | 0.00375344  | 0.995099 |
| rad15          | 0.00143364  | 0.995732 | 0.00143485  | 0.996534 |
| rad19syn       | 0.00135160  | 0.997084 | 0.00135275  | 0.997887 |
| Phenyl+cycC3H4 | 0.000804582 | 0.997888 | 0.000000    | 0.997887 |
| Ph+MeAc        | 0.000280458 | 0.998169 | 0.000280696 | 0.998167 |
| PhCH2CCH+H     | 0.000252057 | 0.998421 | 0.000252272 | 0.998420 |
| C2H2+PhCH2     | 0.000248050 | 0.998669 | 0.000248260 | 0.998668 |
| Ph+Allene      | 0.000228165 | 0.998897 | 0.000228359 | 0.998896 |
| rad6           | 0.000171460 | 0.999068 | 0.000171606 | 0.999068 |
| rad21          | 0.000157270 | 0.999226 | 0.000157404 | 0.999225 |
| rad67          | 0.000134762 | 0.999360 | 0.000134876 | 0.999360 |
| rad2           | 0.000111861 | 0.999472 | 0.000111955 | 0.999472 |
| PhCCCH3+H      | 9.70704e-05 | 0.999569 | 9.71527e-05 | 0.999569 |
| rad11          | 6.87937e-05 | 0.999638 | 6.88521e-05 | 0.999638 |
| rad45          | 6.70032e-05 | 0.999705 | 6.70600e-05 | 0.999705 |
| PhCCH+CH3      | 6.13573e-05 | 0.999766 | 6.14094e-05 | 0.999767 |
| rad35          | 4.81193e-05 | 0.999815 | 4.81602e-05 | 0.999815 |
| rad1           | 3.92005e-05 | 0.999854 | 3.92338e-05 | 0.999854 |
| rad20          | 2.65921e-05 | 0.999880 | 2.66147e-05 | 0.999881 |
| rad26          | 2.36222e-05 | 0.999904 | 2.36423e-05 | 0.999904 |
| rad22          | 1.85813e-05 | 0.999923 | 1.85970e-05 | 0.999923 |
| rad10          | 1.03295e-05 | 0.999933 | 1.03383e-05 | 0.999933 |
| rad7           | 1.01601e-05 | 0.999943 | 1.01687e-05 | 0.999943 |
| rad23          | 9.83384e-06 | 0.999953 | 9.84213e-06 | 0.999953 |
| PAH10+CH3      | 8.80013e-06 | 0.999962 | 8.80762e-06 | 0.999962 |
| rad36          | 6.97530e-06 | 0.999969 | 6.98122e-06 | 0.999969 |
| rad24          | 6.54704e-06 | 0.999975 | 6.55259e-06 | 0.999975 |
| PAH3+H         | 4.60148e-06 | 0.999980 | 4.60538e-06 | 0.999980 |
| rad18          | 3.63840e-06 | 0.999983 | 3.64149e-06 | 0.999984 |
| rad37          | 3.43193e-06 | 0.999987 | 3.43484e-06 | 0.999987 |
| PAH7+H         | 2.10536e-06 | 0.999989 | 2.10714e-06 | 0.999989 |
| rad30          | 2.05585e-06 | 0.999991 | 2.05759e-06 | 0.999991 |
| rad13          | 1.98197e-06 | 0.999993 | 1.98365e-06 | 0.999993 |
| rad25          | 9.11352e-07 | 0.999994 | 9.12128e-07 | 0.999994 |
| rad38          | 8.48722e-07 | 0.999995 | 8.49443e-07 | 0.999995 |
| rad28          | 7.81005e-07 | 0.999996 | 7.81668e-07 | 0.999996 |
| rad3           | 5.25072e-07 | 0.999996 | 5.25517e-07 | 0.999996 |
| rad59          | 4.13048e-07 | 0.999996 | 4.13398e-07 | 0.999997 |
| rad4           | 4.04500e-07 | 0.999997 | 4.04844e-07 | 0.999997 |
| rad33          | 3.84487e-07 | 0.999997 | 3.84814e-07 | 0.999998 |
| rad27          | 3.53115e-07 | 0.999998 | 3.53415e-07 | 0.999998 |
| PAH9+H         | 3.13101e-07 | 0.999998 | 3.13367e-07 | 0.999998 |
| rad5           | 3.09519e-07 | 0.999998 | 3.09782e-07 | 0.999999 |
| rad60syn       | 2.88812e-07 | 0.999999 | 2.89058e-07 | 0.999999 |
| rad39          | 1.84265e-07 | 0.999999 | 1.84421e-07 | 0.999999 |
| rad60anti      | 1.83453e-07 | 0.999999 | 1.83609e-07 | 0.999999 |
| PAH1+H         | 1.83117e-07 | 0.999999 | 1.83272e-07 | 0.999999 |
| rad31          | 1.05985e-07 | 0.999999 | 1.06075e-07 | 0.999999 |
| rad70          | 7.89719e-08 | 0.999999 | 7.90389e-08 | 1.000000 |
| rad43          | 6.20099e-08 | 0.999999 | 6.20625e-08 | 1.000000 |
| rad58          | 5.95106e-08 | 0.999999 | 5.95611e-08 | 1.000000 |
| rad50          | 5.06123e-08 | 0.999999 | 5.06553e-08 | 1.000000 |
| rad46          | 4.31698e-08 | 0.999999 | 4.32065e-08 | 1.000000 |
| rad54          | 3.50768e-08 | 1.000000 | 3.51067e-08 | 1.000000 |
| rad47          | 2.43618e-08 | 1.000000 | 2.43825e-08 | 1.000000 |
| rad34          | 2.20749e-08 | 1.000000 | 2.20936e-08 | 1.000000 |
| rad61          | 2.05749e-08 | 1.000000 | 2.05924e-08 | 1.000000 |
| rad51          | 1.57704e-08 | 1.000000 | 1.57838e-08 | 1.000000 |
| PAH8+H         | 1.14975e-08 | 1.000000 | 1.15073e-08 | 1.000000 |
| rad14          | 1.04871e-08 | 1.000000 | 1.04960e-08 | 1.000000 |
| rad41          | 5.73491e-09 | 1.000000 | 5.73977e-09 | 1.000000 |
| rad52          | 4.36272e-09 | 1.000000 | 4.36642e-09 | 1.000000 |
| rad55          | 2.81591e-09 | 1.000000 | 2.81830e-09 | 1.000000 |
| rad62          | 2.43438e-09 | 1.000000 | 2.43644e-09 | 1.000000 |
| rad68syn       | 2.09523e-09 | 1.000000 | 2.09700e-09 | 1.000000 |
| rad40syn       | 1.64028e-09 | 1.000000 | 1.64167e-09 | 1.000000 |
| rad68anti      | 1.36011e-09 | 1.000000 | 1.36126e-09 | 1.000000 |
| rad40anti      | 1.29426e-09 | 1.000000 | 1.29536e-09 | 1.000000 |
| rad56          | 1.23755e-09 | 1.000000 | 1.23861e-09 | 1.000000 |
| rad53          | 1.04758e-09 | 1.000000 | 1.04847e-09 | 1.000000 |
| rad65          | 5.52949e-10 | 1.000000 | 5.53419e-10 | 1.000000 |
| rad64          | 4.43998e-10 | 1.000000 | 4.44374e-10 | 1.000000 |
| rad71          | 3.34560e-10 | 1.000000 | 3.34845e-10 | 1.000000 |
| rad73          | 2.56818e-10 | 1.000000 | 2.57037e-10 | 1.000000 |
| rad42          | 2.39374e-10 | 1.000000 | 2.39576e-10 | 1.000000 |
| rad72          | 1.02655e-11 | 1.000000 | 1.02742e-11 | 1.000000 |

100000000. Pa, 1200.00000 K

=====



| Rate constant             | True (fraction)       | Effective (fraction)  |
|---------------------------|-----------------------|-----------------------|
| Total                     | 3.72623e-12 (1.00 )   | 3.72310e-12 (1.00 )   |
| Formation of rad19        | 2.86288e-12 (0.768 )  | 2.85996e-12 (0.768 )  |
| H-abstraction to cyc2enyl | 6.53266e-13 (0.175 )  | 6.53266e-13 (0.175 )  |
| H-abstraction to cyc1enyl | 2.10085e-13 (0.0564 ) | 2.09871e-13 (0.0564 ) |

| species                       | PYtrue      | Cumul    | PYeffective | Cumul    |
|-------------------------------|-------------|----------|-------------|----------|
| rad9                          | 0.700082    | 0.700082 | 0.700671    | 0.700671 |
| Benzene+cycloprop-2-enylidene | 0.175315    | 0.875398 | 0.175463    | 0.876134 |
| Benzene+cycloprop-1-enylidene | 0.0563801   | 0.931778 | 0.0563700   | 0.932504 |
| rad19anti                     | 0.0136061   | 0.945384 | 0.0136175   | 0.946122 |
| PhcycC3H3_B+H                 | 0.0100862   | 0.955470 | 0.0100946   | 0.956216 |
| PhCHCCH2+H                    | 0.00901583  | 0.964486 | 0.00902343  | 0.965240 |
| Indene+H                      | 0.00884780  | 0.973333 | 0.00885528  | 0.974095 |
| PhcycC3H3_A+H                 | 0.00854332  | 0.981877 | 0.00855055  | 0.982646 |
| rad12                         | 0.00708478  | 0.988962 | 0.00709075  | 0.989736 |
| rad8                          | 0.00520185  | 0.994163 | 0.00520622  | 0.994943 |
| rad15                         | 0.00190596  | 0.996069 | 0.00190757  | 0.996850 |
| rad19syn                      | 0.00120297  | 0.997272 | 0.00120398  | 0.998054 |
| Phenyl+cycC3H4                | 0.000783855 | 0.998056 | 0.000000    | 0.998054 |
| Ph+MeAc                       | 0.000256565 | 0.998313 | 0.000256781 | 0.998311 |
| PhCH2CCH+H                    | 0.000209834 | 0.998523 | 0.000210011 | 0.998521 |
| C2H2+PhCH2                    | 0.000196316 | 0.998719 | 0.000196481 | 0.998717 |
| Ph+Allene                     | 0.000193544 | 0.998912 | 0.000193707 | 0.998911 |
| rad21                         | 0.000187730 | 0.999100 | 0.000187888 | 0.999099 |
| rad6                          | 0.000140405 | 0.999241 | 0.000140524 | 0.999240 |
| rad11                         | 0.000119261 | 0.999360 | 0.000119362 | 0.999359 |
| rad67                         | 0.000118510 | 0.999478 | 0.000118610 | 0.999478 |
| rad2                          | 9.89046e-05 | 0.999577 | 9.89876e-05 | 0.999577 |
| PhCCCH3+H                     | 8.87361e-05 | 0.999666 | 8.88109e-05 | 0.999665 |
| PhCCH+CH3                     | 5.64751e-05 | 0.999722 | 5.65226e-05 | 0.999722 |
| rad45                         | 5.42535e-05 | 0.999777 | 5.42992e-05 | 0.999776 |
| rad35                         | 4.22997e-05 | 0.999819 | 4.23353e-05 | 0.999818 |
| rad1                          | 3.36244e-05 | 0.999853 | 3.36527e-05 | 0.999852 |
| rad20                         | 2.98353e-05 | 0.999882 | 2.98604e-05 | 0.999882 |
| rad26                         | 1.95218e-05 | 0.999902 | 1.95383e-05 | 0.999902 |
| rad7                          | 1.54137e-05 | 0.999917 | 1.54266e-05 | 0.999917 |
| rad22                         | 1.44199e-05 | 0.999932 | 1.44321e-05 | 0.999931 |
| rad10                         | 1.20359e-05 | 0.999944 | 1.20460e-05 | 0.999943 |
| PAH10+CH3                     | 8.56091e-06 | 0.999952 | 8.56814e-06 | 0.999952 |
| rad23                         | 7.60907e-06 | 0.999960 | 7.61547e-06 | 0.999960 |
| rad18                         | 7.32786e-06 | 0.999967 | 7.33403e-06 | 0.999967 |
| rad24                         | 5.98711e-06 | 0.999973 | 5.99215e-06 | 0.999973 |
| rad36                         | 5.57891e-06 | 0.999979 | 5.58361e-06 | 0.999979 |
| rad13                         | 3.91513e-06 | 0.999983 | 3.91843e-06 | 0.999982 |
| PAH3+H                        | 3.75966e-06 | 0.999987 | 3.76283e-06 | 0.999986 |
| rad37                         | 3.28751e-06 | 0.999990 | 3.29028e-06 | 0.999990 |
| PAH7+H                        | 1.77649e-06 | 0.999992 | 1.77798e-06 | 0.999991 |
| rad30                         | 1.69782e-06 | 0.999993 | 1.69925e-06 | 0.999993 |
| rad25                         | 1.42255e-06 | 0.999995 | 1.42375e-06 | 0.999994 |
| rad38                         | 8.08810e-07 | 0.999996 | 8.09487e-07 | 0.999995 |
| rad28                         | 6.40514e-07 | 0.999996 | 6.41054e-07 | 0.999996 |
| rad27                         | 5.69242e-07 | 0.999997 | 5.69721e-07 | 0.999996 |
| rad33                         | 5.27632e-07 | 0.999997 | 5.28076e-07 | 0.999997 |
| rad3                          | 4.57360e-07 | 0.999998 | 4.57745e-07 | 0.999997 |
| rad4                          | 3.49294e-07 | 0.999998 | 3.49588e-07 | 0.999998 |
| rad59                         | 3.37876e-07 | 0.999998 | 3.38160e-07 | 0.999998 |
| PAH9+H                        | 2.81360e-07 | 0.999999 | 2.81597e-07 | 0.999998 |
| rad5                          | 2.77531e-07 | 0.999999 | 2.77765e-07 | 0.999999 |
| rad60syn                      | 2.36964e-07 | 0.999999 | 2.37163e-07 | 0.999999 |
| PAH1+H                        | 1.74388e-07 | 0.999999 | 1.74534e-07 | 0.999999 |
| rad39                         | 1.74023e-07 | 1.000000 | 1.74170e-07 | 0.999999 |
| rad60anti                     | 1.50468e-07 | 1.000000 | 1.50595e-07 | 0.999999 |
| rad31                         | 9.15450e-08 | 1.000000 | 9.16224e-08 | 0.999999 |
| rad70                         | 5.49073e-08 | 1.000000 | 5.49535e-08 | 1.000000 |
| rad58                         | 4.84511e-08 | 1.000000 | 4.84919e-08 | 1.000000 |
| rad43                         | 4.71471e-08 | 1.000000 | 4.71868e-08 | 1.000000 |
| rad50                         | 4.33208e-08 | 1.000000 | 4.33573e-08 | 1.000000 |
| rad46                         | 3.69025e-08 | 1.000000 | 3.69336e-08 | 1.000000 |
| rad54                         | 3.12668e-08 | 1.000000 | 3.12931e-08 | 1.000000 |
| rad61                         | 2.02955e-08 | 1.000000 | 2.03126e-08 | 1.000000 |
| rad47                         | 1.97679e-08 | 1.000000 | 1.97845e-08 | 1.000000 |
| rad14                         | 1.74140e-08 | 1.000000 | 1.74286e-08 | 1.000000 |
| rad34                         | 1.53240e-08 | 1.000000 | 1.53368e-08 | 1.000000 |
| rad51                         | 1.34827e-08 | 1.000000 | 1.34941e-08 | 1.000000 |
| PAH8+H                        | 8.25036e-09 | 1.000000 | 8.25734e-09 | 1.000000 |
| rad41                         | 4.35434e-09 | 1.000000 | 4.35801e-09 | 1.000000 |
| rad52                         | 3.72877e-09 | 1.000000 | 3.73190e-09 | 1.000000 |

|           |             |         |             |          |
|-----------|-------------|---------|-------------|----------|
| rad55     | 2.51419e-09 | 1.00000 | 2.51631e-09 | 1.000000 |
| rad62     | 1.81129e-09 | 1.00000 | 1.81281e-09 | 1.000000 |
| rad68syn  | 1.45145e-09 | 1.00000 | 1.45267e-09 | 1.000000 |
| rad40syn  | 1.19119e-09 | 1.00000 | 1.19219e-09 | 1.000000 |
| rad56     | 1.11662e-09 | 1.00000 | 1.11755e-09 | 1.000000 |
| rad40anti | 9.50777e-10 | 1.00000 | 9.51575e-10 | 1.000000 |
| rad68anti | 9.42211e-10 | 1.00000 | 9.43002e-10 | 1.000000 |
| rad53     | 9.41934e-10 | 1.00000 | 9.42726e-10 | 1.000000 |
| rad65     | 5.06572e-10 | 1.00000 | 5.06998e-10 | 1.000000 |
| rad64     | 4.38229e-10 | 1.00000 | 4.38598e-10 | 1.000000 |
| rad71     | 2.91012e-10 | 1.00000 | 2.91258e-10 | 1.000000 |
| rad73     | 2.22924e-10 | 1.00000 | 2.23112e-10 | 1.000000 |
| rad42     | 1.77762e-10 | 1.00000 | 1.77911e-10 | 1.000000 |
| rad72     | 8.96158e-12 | 1.00000 | 8.96912e-12 | 1.000000 |

100000000. Pa, 1300.00000 K

| Rate constant             | True (fraction)       | Effective (fraction)  |
|---------------------------|-----------------------|-----------------------|
| Total                     | 4.84401e-12 (1.00 )   | 4.83963e-12 (1.00 )   |
| Formation of rad19        | 3.55537e-12 (0.734 )  | 3.55138e-12 (0.734 )  |
| H-abstraction to cyc2enyl | 9.48893e-13 (0.196 )  | 9.48893e-13 (0.196 )  |
| H-abstraction to cyclenyl | 3.39740e-13 (0.0701 ) | 3.39359e-13 (0.0701 ) |

| species                       | PYtrue      | Cumul    | PYeffective | Cumul    |
|-------------------------------|-------------|----------|-------------|----------|
| rad9                          | 0.667359    | 0.667359 | 0.667962    | 0.667962 |
| Benzene+cycloprop-2-enylidene | 0.195890    | 0.863249 | 0.196067    | 0.864029 |
| Benzene+cycloprop-1-enylidene | 0.0701362   | 0.933385 | 0.0701208   | 0.934150 |
| rad19anti                     | 0.0121924   | 0.945578 | 0.0122034   | 0.946353 |
| PhcycC3H3_B+H                 | 0.00952712  | 0.955105 | 0.00953574  | 0.955889 |
| PhCHCCH2+H                    | 0.00865362  | 0.963758 | 0.00866140  | 0.964550 |
| PhcycC3H3_A+H                 | 0.00807775  | 0.971836 | 0.00808507  | 0.972636 |
| Indene+H                      | 0.00780243  | 0.979639 | 0.00780952  | 0.980445 |
| rad12                         | 0.00674625  | 0.986385 | 0.00675235  | 0.987197 |
| rad8                          | 0.00636873  | 0.992754 | 0.00637449  | 0.993572 |
| rad15                         | 0.00346331  | 0.996217 | 0.00346644  | 0.997038 |
| rad19syn                      | 0.00106714  | 0.997284 | 0.00106810  | 0.998106 |
| Phenyl+cycC3H4                | 0.000824568 | 0.998109 | 0.00080000  | 0.998106 |
| Ph+MeAc                       | 0.000247810 | 0.998356 | 0.000248034 | 0.998354 |
| rad11                         | 0.000217798 | 0.998574 | 0.000217995 | 0.998572 |
| rad21                         | 0.000197844 | 0.998772 | 0.000198024 | 0.998771 |
| PhCH2CCH+H                    | 0.000170584 | 0.998943 | 0.000170738 | 0.998941 |
| C2H2+PhCH2                    | 0.000170415 | 0.999113 | 0.000170569 | 0.999112 |
| Ph+Allene                     | 0.000160103 | 0.999273 | 0.000160248 | 0.999272 |
| rad6                          | 0.000110101 | 0.999383 | 0.000110201 | 0.999382 |
| rad67                         | 0.000104182 | 0.999487 | 0.000104276 | 0.999487 |
| rad2                          | 9.10648e-05 | 0.999579 | 9.11468e-05 | 0.999578 |
| PhCCCH3+H                     | 8.55894e-05 | 0.999664 | 8.56667e-05 | 0.999663 |
| PhCCH+CH3                     | 5.48758e-05 | 0.999719 | 5.49255e-05 | 0.999718 |
| rad45                         | 4.85173e-05 | 0.999768 | 4.85612e-05 | 0.999767 |
| rad35                         | 3.71671e-05 | 0.999805 | 3.72007e-05 | 0.999804 |
| rad1                          | 3.04962e-05 | 0.999835 | 3.05238e-05 | 0.999835 |
| rad20                         | 3.03874e-05 | 0.999866 | 3.04149e-05 | 0.999865 |
| rad7                          | 2.73867e-05 | 0.999893 | 2.74114e-05 | 0.999892 |
| rad26                         | 1.82078e-05 | 0.999911 | 1.82242e-05 | 0.999911 |
| rad10                         | 1.60649e-05 | 0.999927 | 1.60794e-05 | 0.999927 |
| rad18                         | 1.49613e-05 | 0.999942 | 1.49748e-05 | 0.999942 |
| rad22                         | 1.16394e-05 | 0.999954 | 1.16499e-05 | 0.999953 |
| PAH10+CH3                     | 8.37464e-06 | 0.999962 | 8.38219e-06 | 0.999962 |
| rad23                         | 6.26438e-06 | 0.999968 | 6.27005e-06 | 0.999968 |
| rad24                         | 5.48121e-06 | 0.999974 | 5.48617e-06 | 0.999973 |
| rad13                         | 5.44272e-06 | 0.999979 | 5.44764e-06 | 0.999979 |
| rad36                         | 4.96188e-06 | 0.999984 | 4.96637e-06 | 0.999984 |
| rad37                         | 3.17469e-06 | 0.999988 | 3.17756e-06 | 0.999987 |
| PAH3+H                        | 2.94180e-06 | 0.999990 | 2.94446e-06 | 0.999990 |
| rad25                         | 1.56973e-06 | 0.999992 | 1.57115e-06 | 0.999992 |
| PAH7+H                        | 1.55928e-06 | 0.999994 | 1.56069e-06 | 0.999993 |
| rad30                         | 1.34195e-06 | 0.999995 | 1.34317e-06 | 0.999994 |
| rad38                         | 7.85080e-07 | 0.999996 | 7.85788e-07 | 0.999995 |
| rad27                         | 7.18787e-07 | 0.999996 | 7.19437e-07 | 0.999996 |
| rad33                         | 5.62487e-07 | 0.999997 | 5.62996e-07 | 0.999997 |
| rad28                         | 5.35163e-07 | 0.999998 | 5.35647e-07 | 0.999997 |
| rad3                          | 4.14751e-07 | 0.999998 | 4.15126e-07 | 0.999997 |
| rad4                          | 3.15498e-07 | 0.999998 | 3.15783e-07 | 0.999998 |
| rad5                          | 3.14205e-07 | 0.999999 | 3.14488e-07 | 0.999998 |
| PAH9+H                        | 2.78312e-07 | 0.999999 | 2.78564e-07 | 0.999998 |
| rad59                         | 2.64624e-07 | 0.999999 | 2.64863e-07 | 0.999999 |
| rad60syn                      | 1.86091e-07 | 0.999999 | 1.86259e-07 | 0.999999 |
| PAH1+H                        | 1.69295e-07 | 0.999999 | 1.69449e-07 | 0.999999 |

|           |             |          |             |          |
|-----------|-------------|----------|-------------|----------|
| rad39     | 1.66999e-07 | 1.000000 | 1.67150e-07 | 0.999999 |
| rad60anti | 1.18127e-07 | 1.000000 | 1.18234e-07 | 0.999999 |
| rad31     | 8.31644e-08 | 1.000000 | 8.32392e-08 | 0.999999 |
| rad50     | 4.09504e-08 | 1.000000 | 4.09874e-08 | 0.999999 |
| rad43     | 3.98460e-08 | 1.000000 | 3.98819e-08 | 0.999999 |
| rad70     | 3.90042e-08 | 1.000000 | 3.90394e-08 | 1.000000 |
| rad58     | 3.78123e-08 | 1.000000 | 3.78466e-08 | 1.000000 |
| rad46     | 3.48618e-08 | 1.000000 | 3.48933e-08 | 1.000000 |
| rad54     | 2.85128e-08 | 1.000000 | 2.85386e-08 | 1.000000 |
| rad14     | 2.29133e-08 | 1.000000 | 2.29340e-08 | 1.000000 |
| rad61     | 2.00605e-08 | 1.000000 | 2.00786e-08 | 1.000000 |
| rad47     | 1.77458e-08 | 1.000000 | 1.77618e-08 | 1.000000 |
| rad51     | 1.27551e-08 | 1.000000 | 1.27666e-08 | 1.000000 |
| rad34     | 1.09051e-08 | 1.000000 | 1.09150e-08 | 1.000000 |
| PAH8+H    | 6.37321e-09 | 1.000000 | 6.37897e-09 | 1.000000 |
| rad41     | 3.69829e-09 | 1.000000 | 3.70163e-09 | 1.000000 |
| rad52     | 3.52702e-09 | 1.000000 | 3.53021e-09 | 1.000000 |
| rad55     | 2.29861e-09 | 1.000000 | 2.30069e-09 | 1.000000 |
| rad62     | 1.43287e-09 | 1.000000 | 1.43417e-09 | 1.000000 |
| rad68syn  | 1.03952e-09 | 1.000000 | 1.04046e-09 | 1.000000 |
| rad56     | 1.03475e-09 | 1.000000 | 1.03569e-09 | 1.000000 |
| rad40syn  | 9.40426e-10 | 1.000000 | 9.41275e-10 | 1.000000 |
| rad53     | 8.69289e-10 | 1.000000 | 8.70074e-10 | 1.000000 |
| rad40anti | 7.66826e-10 | 1.000000 | 7.67523e-10 | 1.000000 |
| rad68anti | 6.74741e-10 | 1.000000 | 6.75351e-10 | 1.000000 |
| rad65     | 5.10515e-10 | 1.000000 | 5.10976e-10 | 1.000000 |
| rad64     | 4.34408e-10 | 1.000000 | 4.34801e-10 | 1.000000 |
| rad71     | 2.79110e-10 | 1.000000 | 2.79362e-10 | 1.000000 |
| rad73     | 2.13426e-10 | 1.000000 | 2.13619e-10 | 1.000000 |
| rad42     | 1.41051e-10 | 1.000000 | 1.41178e-10 | 1.000000 |
| rad72     | 8.62133e-12 | 1.000000 | 8.62911e-12 | 1.000000 |

100000000. Pa, 1400.00000 K

| Rate constant             | True (fraction)       | Effective (fraction)  |
|---------------------------|-----------------------|-----------------------|
| Total                     | 6.19360e-12 (1.00 )   | 6.18686e-12 (1.00 )   |
| Formation of rad19        | 4.34185e-12 (0.701 )  | 4.33584e-12 (0.701 )  |
| H-abstraction to cyc2enyl | 1.32990e-12 (0.215 )  | 1.32990e-12 (0.215 )  |
| H-abstraction to cyclenyl | 5.21850e-13 (0.0843 ) | 5.21128e-13 (0.0842 ) |

| species                       | PYtrue      | Cumul    | PYeffective | Cumul    |
|-------------------------------|-------------|----------|-------------|----------|
| rad9                          | 0.634690    | 0.634690 | 0.635381    | 0.635381 |
| Benzene+cycloprop-2-enylidene | 0.214721    | 0.849411 | 0.214955    | 0.850336 |
| Benzene+cycloprop-1-enylidene | 0.0842564   | 0.933668 | 0.0842313   | 0.934567 |
| rad19anti                     | 0.0109328   | 0.944601 | 0.0109447   | 0.945512 |
| PhcycC3H3_B+H                 | 0.00900856  | 0.953609 | 0.00901842  | 0.954530 |
| PhCHCCH2+H                    | 0.00847971  | 0.962089 | 0.00848896  | 0.963019 |
| PhcycC3H3_A+H                 | 0.00764956  | 0.969738 | 0.00765786  | 0.970677 |
| rad8                          | 0.00715912  | 0.976898 | 0.00716687  | 0.977844 |
| Indene+H                      | 0.00659025  | 0.983488 | 0.00659743  | 0.984441 |
| rad12                         | 0.00641926  | 0.989907 | 0.00642624  | 0.990868 |
| rad15                         | 0.00629989  | 0.996207 | 0.00630675  | 0.997174 |
| Phenyl+cycC3H4                | 0.000970565 | 0.997178 | 0.000000    | 0.997174 |
| rad19syn                      | 0.000947411 | 0.998125 | 0.000948439 | 0.998123 |
| rad11                         | 0.000319040 | 0.998444 | 0.000319387 | 0.998442 |
| Ph+MeAc                       | 0.000244353 | 0.998688 | 0.000244618 | 0.998687 |
| rad21                         | 0.000196705 | 0.998885 | 0.000196919 | 0.998884 |
| C2H2+PhCH2                    | 0.000156398 | 0.999041 | 0.000156569 | 0.999040 |
| PhCH2CCH+H                    | 0.000136912 | 0.999178 | 0.000137062 | 0.999177 |
| Ph+Allene                     | 0.000128576 | 0.999307 | 0.000128716 | 0.999306 |
| rad67                         | 8.75402e-05 | 0.999394 | 8.76354e-05 | 0.999394 |
| rad6                          | 8.68672e-05 | 0.999481 | 8.69619e-05 | 0.999481 |
| rad2                          | 8.53600e-05 | 0.999567 | 8.54523e-05 | 0.999566 |
| PhCCCH3+H                     | 8.42916e-05 | 0.999651 | 8.43836e-05 | 0.999650 |
| PhCCH+CH3                     | 5.42267e-05 | 0.999705 | 5.42857e-05 | 0.999705 |
| rad7                          | 4.59081e-05 | 0.999751 | 4.59581e-05 | 0.999751 |
| rad45                         | 4.55596e-05 | 0.999797 | 4.56092e-05 | 0.999796 |
| rad35                         | 3.12181e-05 | 0.999828 | 3.12521e-05 | 0.999828 |
| rad20                         | 2.94706e-05 | 0.999857 | 2.95026e-05 | 0.999857 |
| rad1                          | 2.83639e-05 | 0.999886 | 2.83948e-05 | 0.999885 |
| rad18                         | 2.21860e-05 | 0.999908 | 2.22101e-05 | 0.999908 |
| rad26                         | 2.03935e-05 | 0.999928 | 2.04157e-05 | 0.999928 |
| rad10                         | 1.88869e-05 | 0.999947 | 1.89074e-05 | 0.999947 |
| rad22                         | 1.11038e-05 | 0.999958 | 1.11158e-05 | 0.999958 |
| PAH10+CH3                     | 7.45944e-06 | 0.999966 | 7.46759e-06 | 0.999966 |
| rad23                         | 5.47715e-06 | 0.999971 | 5.48311e-06 | 0.999971 |
| rad13                         | 5.30166e-06 | 0.999977 | 5.30743e-06 | 0.999976 |
| rad24                         | 5.08015e-06 | 0.999982 | 5.08568e-06 | 0.999981 |

|           |             |          |             |          |
|-----------|-------------|----------|-------------|----------|
| rad36     | 4.64652e-06 | 0.999986 | 4.65158e-06 | 0.999986 |
| rad37     | 2.80304e-06 | 0.999989 | 2.80610e-06 | 0.999989 |
| PAH3+H    | 2.17569e-06 | 0.999991 | 2.17806e-06 | 0.999991 |
| rad25     | 1.41828e-06 | 0.999993 | 1.41983e-06 | 0.999993 |
| PAH7+H    | 1.32322e-06 | 0.999994 | 1.32466e-06 | 0.999994 |
| rad30     | 9.91743e-07 | 0.999995 | 9.92822e-07 | 0.999995 |
| rad27     | 7.87129e-07 | 0.999996 | 7.87988e-07 | 0.999996 |
| rad38     | 7.06175e-07 | 0.999997 | 7.06946e-07 | 0.999996 |
| rad5      | 4.81940e-07 | 0.999997 | 4.82464e-07 | 0.999997 |
| rad33     | 4.77204e-07 | 0.999997 | 4.77724e-07 | 0.999997 |
| rad28     | 4.64254e-07 | 0.999998 | 4.64759e-07 | 0.999998 |
| rad3      | 3.80527e-07 | 0.999998 | 3.80941e-07 | 0.999998 |
| rad4      | 2.88680e-07 | 0.999999 | 2.88993e-07 | 0.999998 |
| PAH9+H    | 2.79948e-07 | 0.999999 | 2.80253e-07 | 0.999999 |
| rad59     | 1.95614e-07 | 0.999999 | 1.95827e-07 | 0.999999 |
| PAH1+H    | 1.51780e-07 | 0.999999 | 1.51945e-07 | 0.999999 |
| rad39     | 1.46692e-07 | 0.999999 | 1.46851e-07 | 0.999999 |
| rad60syn  | 1.37481e-07 | 1.000000 | 1.37631e-07 | 0.999999 |
| rad60anti | 8.72745e-08 | 1.000000 | 8.73697e-08 | 0.999999 |
| rad31     | 7.72856e-08 | 1.000000 | 7.73698e-08 | 1.000000 |
| rad50     | 4.05371e-08 | 1.000000 | 4.05812e-08 | 1.000000 |
| rad43     | 3.68250e-08 | 1.000000 | 3.68650e-08 | 1.000000 |
| rad46     | 3.44993e-08 | 1.000000 | 3.45369e-08 | 1.000000 |
| rad70     | 2.93926e-08 | 1.000000 | 2.94246e-08 | 1.000000 |
| rad58     | 2.80259e-08 | 1.000000 | 2.80564e-08 | 1.000000 |
| rad14     | 2.53141e-08 | 1.000000 | 2.53417e-08 | 1.000000 |
| rad54     | 2.34870e-08 | 1.000000 | 2.35126e-08 | 1.000000 |
| rad61     | 1.79867e-08 | 1.000000 | 1.80062e-08 | 1.000000 |
| rad47     | 1.67291e-08 | 1.000000 | 1.67473e-08 | 1.000000 |
| rad51     | 1.26438e-08 | 1.000000 | 1.26576e-08 | 1.000000 |
| rad34     | 8.24697e-09 | 1.000000 | 8.25594e-09 | 1.000000 |
| PAH8+H    | 5.36241e-09 | 1.000000 | 5.36825e-09 | 1.000000 |
| rad52     | 3.49594e-09 | 1.000000 | 3.49974e-09 | 1.000000 |
| rad41     | 3.44020e-09 | 1.000000 | 3.44395e-09 | 1.000000 |
| rad55     | 1.89760e-09 | 1.000000 | 1.89967e-09 | 1.000000 |
| rad62     | 1.24352e-09 | 1.000000 | 1.24487e-09 | 1.000000 |
| rad56     | 8.63723e-10 | 1.000000 | 8.64664e-10 | 1.000000 |
| rad40syn  | 8.11398e-10 | 1.000000 | 8.12285e-10 | 1.000000 |
| rad68syn  | 7.94230e-10 | 1.000000 | 7.95094e-10 | 1.000000 |
| rad53     | 7.23224e-10 | 1.000000 | 7.24011e-10 | 1.000000 |
| rad40anti | 6.77245e-10 | 1.000000 | 6.77982e-10 | 1.000000 |
| rad65     | 5.23034e-10 | 1.000000 | 5.23603e-10 | 1.000000 |
| rad68anti | 5.15459e-10 | 1.000000 | 5.16020e-10 | 1.000000 |
| rad64     | 3.86207e-10 | 1.000000 | 3.86626e-10 | 1.000000 |
| rad71     | 2.79962e-10 | 1.000000 | 2.80266e-10 | 1.000000 |
| rad73     | 2.13731e-10 | 1.000000 | 2.13964e-10 | 1.000000 |
| rad42     | 1.23130e-10 | 1.000000 | 1.23264e-10 | 1.000000 |
| rad72     | 8.67137e-12 | 1.000000 | 8.68084e-12 | 1.000000 |

10000000. Pa, 1500.00000 K

| Rate constant             | True (fraction)      | Effective (fraction) |
|---------------------------|----------------------|----------------------|
| Total                     | 7.80417e-12 (1.00)   | 7.79284e-12 (1.00)   |
| Formation of rad19        | 5.22661e-12 (0.670)  | 5.21673e-12 (0.669)  |
| H-abstraction to cyc2enyl | 1.80920e-12 (0.232)  | 1.80920e-12 (0.232)  |
| H-abstraction to cyclenyl | 7.68359e-13 (0.0985) | 7.66906e-13 (0.0984) |

| species                       | PYtrue      | Cumul    | PYeffective | Cumul    |
|-------------------------------|-------------|----------|-------------|----------|
| rad9                          | 0.603226    | 0.603226 | 0.604104    | 0.604104 |
| Benzene+cycloprop-2-enylidene | 0.231825    | 0.835051 | 0.232162    | 0.836266 |
| Benzene+cycloprop-1-enylidene | 0.0984549   | 0.933506 | 0.0984117   | 0.934677 |
| rad19anti                     | 0.00981642  | 0.943323 | 0.00983066  | 0.944508 |
| rad15                         | 0.00924991  | 0.952572 | 0.00926339  | 0.953771 |
| PhcycC3H3_B+H                 | 0.00856371  | 0.961136 | 0.00857622  | 0.962348 |
| PhCHCCH2+H                    | 0.00838048  | 0.969517 | 0.00839266  | 0.970740 |
| rad8                          | 0.00764285  | 0.977160 | 0.00765395  | 0.978394 |
| PhcycC3H3_A+H                 | 0.00728455  | 0.984444 | 0.00729514  | 0.985689 |
| rad12                         | 0.00610916  | 0.990553 | 0.00611805  | 0.991807 |
| Indene+H                      | 0.00546531  | 0.996019 | 0.00547326  | 0.997281 |
| Phenyl+cycC3H4                | 0.00126607  | 0.997285 | 0.000000    | 0.997281 |
| rad19syn                      | 0.000843379 | 0.998128 | 0.000844602 | 0.998125 |
| rad11                         | 0.000379358 | 0.998507 | 0.000379910 | 0.998505 |
| Ph+MeAc                       | 0.000243120 | 0.998750 | 0.000243474 | 0.998749 |
| rad21                         | 0.000191800 | 0.998942 | 0.000192078 | 0.998941 |
| C2H2+PhCH2                    | 0.000149980 | 0.999092 | 0.000150198 | 0.999091 |
| PhCH2CCH+H                    | 0.000117269 | 0.999210 | 0.000117439 | 0.999208 |
| Ph+Allene                     | 0.000107058 | 0.999317 | 0.000107214 | 0.999316 |
| PhCCCH3+H                     | 8.38048e-05 | 0.999400 | 8.39266e-05 | 0.999400 |

|           |             |          |             |          |
|-----------|-------------|----------|-------------|----------|
| rad2      | 8.08888e-05 | 0.999481 | 8.10059e-05 | 0.999481 |
| rad6      | 8.03972e-05 | 0.999562 | 8.05139e-05 | 0.999561 |
| rad67     | 7.30705e-05 | 0.999635 | 7.31770e-05 | 0.999634 |
| rad7      | 6.72145e-05 | 0.999702 | 6.73122e-05 | 0.999702 |
| PhCCH+CH3 | 5.37106e-05 | 0.999756 | 5.37887e-05 | 0.999755 |
| rad45     | 4.36703e-05 | 0.999799 | 4.37338e-05 | 0.999799 |
| rad20     | 2.83416e-05 | 0.999828 | 2.83828e-05 | 0.999827 |
| rad1      | 2.67478e-05 | 0.999854 | 2.67867e-05 | 0.999854 |
| rad26     | 2.61312e-05 | 0.999881 | 2.61692e-05 | 0.999880 |
| rad35     | 2.60537e-05 | 0.999907 | 2.60916e-05 | 0.999907 |
| rad18     | 2.47146e-05 | 0.999931 | 2.47506e-05 | 0.999931 |
| rad10     | 1.87340e-05 | 0.999950 | 1.87612e-05 | 0.999950 |
| rad22     | 1.35747e-05 | 0.999964 | 1.35944e-05 | 0.999964 |
| PAH10+CH3 | 5.63309e-06 | 0.999969 | 5.64128e-06 | 0.999969 |
| rad23     | 5.62840e-06 | 0.999975 | 5.63658e-06 | 0.999975 |
| rad24     | 4.78277e-06 | 0.999980 | 4.78972e-06 | 0.999980 |
| rad36     | 4.44534e-06 | 0.999984 | 4.45181e-06 | 0.999984 |
| rad13     | 4.02248e-06 | 0.999988 | 4.02833e-06 | 0.999988 |
| rad37     | 2.10795e-06 | 0.999990 | 2.11102e-06 | 0.999990 |
| PAH3+H    | 1.67208e-06 | 0.999992 | 1.67451e-06 | 0.999992 |
| rad25     | 1.25389e-06 | 0.999993 | 1.25571e-06 | 0.999993 |
| PAH7+H    | 1.03612e-06 | 0.999994 | 1.03762e-06 | 0.999994 |
| rad5      | 9.83625e-07 | 0.999995 | 9.85054e-07 | 0.999995 |
| rad27     | 8.05814e-07 | 0.999996 | 8.06987e-07 | 0.999996 |
| rad30     | 7.54252e-07 | 0.999997 | 7.55347e-07 | 0.999997 |
| rad38     | 5.54359e-07 | 0.999997 | 5.55165e-07 | 0.999997 |
| rad28     | 4.44324e-07 | 0.999998 | 4.44970e-07 | 0.999998 |
| rad3      | 3.52059e-07 | 0.999998 | 3.52571e-07 | 0.999998 |
| rad33     | 3.37035e-07 | 0.999998 | 3.37525e-07 | 0.999998 |
| rad4      | 2.66450e-07 | 0.999999 | 2.66837e-07 | 0.999999 |
| PAH9+H    | 2.63459e-07 | 0.999999 | 2.63842e-07 | 0.999999 |
| rad59     | 1.50098e-07 | 0.999999 | 1.50316e-07 | 0.999999 |
| PAH1+H    | 1.17379e-07 | 0.999999 | 1.17550e-07 | 0.999999 |
| rad39     | 1.09920e-07 | 0.999999 | 1.10080e-07 | 0.999999 |
| rad60syn  | 1.05139e-07 | 0.999999 | 1.05292e-07 | 1.000000 |
| rad31     | 7.27885e-08 | 1.000000 | 7.28945e-08 | 1.000000 |
| rad60anti | 6.67663e-08 | 1.000000 | 6.68634e-08 | 1.000000 |
| rad50     | 4.08262e-08 | 1.000000 | 4.08856e-08 | 1.000000 |
| rad43     | 3.56415e-08 | 1.000000 | 3.56933e-08 | 1.000000 |
| rad46     | 3.47398e-08 | 1.000000 | 3.47904e-08 | 1.000000 |
| rad14     | 2.56748e-08 | 1.000000 | 2.57121e-08 | 1.000000 |
| rad70     | 2.46558e-08 | 1.000000 | 2.46917e-08 | 1.000000 |
| rad58     | 2.16593e-08 | 1.000000 | 2.16908e-08 | 1.000000 |
| rad54     | 1.68755e-08 | 1.000000 | 1.69000e-08 | 1.000000 |
| rad47     | 1.60891e-08 | 1.000000 | 1.61125e-08 | 1.000000 |
| rad61     | 1.36345e-08 | 1.000000 | 1.36544e-08 | 1.000000 |
| rad51     | 1.27454e-08 | 1.000000 | 1.27640e-08 | 1.000000 |
| rad34     | 6.94004e-09 | 1.000000 | 6.95012e-09 | 1.000000 |
| PAH8+H    | 4.89595e-09 | 1.000000 | 4.90307e-09 | 1.000000 |
| rad52     | 3.52386e-09 | 1.000000 | 3.52898e-09 | 1.000000 |
| rad41     | 3.34507e-09 | 1.000000 | 3.34994e-09 | 1.000000 |
| rad55     | 1.36529e-09 | 1.000000 | 1.36727e-09 | 1.000000 |
| rad62     | 1.14828e-09 | 1.000000 | 1.14994e-09 | 1.000000 |
| rad40syn  | 7.53442e-10 | 1.000000 | 7.54537e-10 | 1.000000 |
| rad68syn  | 6.74348e-10 | 1.000000 | 6.75331e-10 | 1.000000 |
| rad40anti | 6.38477e-10 | 1.000000 | 6.39405e-10 | 1.000000 |
| rad56     | 6.25684e-10 | 1.000000 | 6.26594e-10 | 1.000000 |
| rad53     | 5.22845e-10 | 1.000000 | 5.23605e-10 | 1.000000 |
| rad65     | 4.99256e-10 | 1.000000 | 4.99982e-10 | 1.000000 |
| rad68anti | 4.37606e-10 | 1.000000 | 4.38243e-10 | 1.000000 |
| rad71     | 2.85342e-10 | 1.000000 | 2.85757e-10 | 1.000000 |
| rad64     | 2.81666e-10 | 1.000000 | 2.82075e-10 | 1.000000 |
| rad73     | 2.17512e-10 | 1.000000 | 2.17829e-10 | 1.000000 |
| rad42     | 1.14248e-10 | 1.000000 | 1.14414e-10 | 1.000000 |
| rad72     | 8.86047e-12 | 1.000000 | 8.87338e-12 | 1.000000 |

10000000.0 Pa, 20.0000000 K

| Rate constant             | True (fraction)         | Effective (fraction)    |             |          |
|---------------------------|-------------------------|-------------------------|-------------|----------|
| Total                     | 1.24541e-22 (1.00 )     | 1.24541e-22 (1.00 )     |             |          |
| Formation of rad19        | 1.24541e-22 (1.00 )     | 1.24541e-22 (1.00 )     |             |          |
| H-abstraction to cyc2enyl | 3.84323e-68 (3.09e-46)  | 3.84323e-68 (3.09e-46)  |             |          |
| H-abstraction to cyclenyl | 6.26313e-106 (5.03e-84) | 6.26313e-106 (5.03e-84) |             |          |
| species                   | PYtrue                  | Cumul                   | PYeffective | Cumul    |
| rad19anti                 | 0.983084                | 0.983084                | 0.983084    | 0.983084 |
| rad9                      | 0.0151076               | 0.998192                | 0.0151076   | 0.998192 |
| rad8                      | 0.00180782              | 0.999999                | 0.00180782  | 0.999999 |

|                               |             |          |             |          |
|-------------------------------|-------------|----------|-------------|----------|
| rad19syn                      | 1.83256e-07 | 1.000000 | 1.83256e-07 | 1.000000 |
| rad12                         | 1.39531e-07 | 1.000000 | 1.39531e-07 | 1.000000 |
| rad15                         | 1.00225e-07 | 1.000000 | 1.00225e-07 | 1.000000 |
| rad7                          | 4.55902e-11 | 1.000000 | 4.55902e-11 | 1.000000 |
| Indene+H                      | 1.18820e-11 | 1.000000 | 1.18820e-11 | 1.000000 |
| PhCHCCH2+H                    | 5.81631e-13 | 1.000000 | 5.81631e-13 | 1.000000 |
| rad11                         | 2.49403e-14 | 1.000000 | 2.49403e-14 | 1.000000 |
| rad2                          | 2.21916e-14 | 1.000000 | 2.21916e-14 | 1.000000 |
| rad6                          | 1.34708e-14 | 1.000000 | 1.34708e-14 | 1.000000 |
| rad1                          | 6.02557e-15 | 1.000000 | 6.02557e-15 | 1.000000 |
| rad5                          | 4.46693e-15 | 1.000000 | 4.46693e-15 | 1.000000 |
| rad21                         | 1.38417e-15 | 1.000000 | 1.38417e-15 | 1.000000 |
| PhcycC3H3_A+H                 | 9.74627e-16 | 1.000000 | 9.74627e-16 | 1.000000 |
| rad20                         | 5.14894e-16 | 1.000000 | 5.14894e-16 | 1.000000 |
| rad26                         | 1.94383e-16 | 1.000000 | 1.94383e-16 | 1.000000 |
| rad18                         | 7.26372e-17 | 1.000000 | 7.26372e-17 | 1.000000 |
| Phenyl+cycC3H4                | 3.43288e-17 | 1.000000 | 0.00000     | 1.000000 |
| rad22                         | 4.09987e-18 | 1.000000 | 4.09987e-18 | 1.000000 |
| rad24                         | 8.96148e-19 | 1.000000 | 8.96148e-19 | 1.000000 |
| rad67                         | 6.48437e-19 | 1.000000 | 6.48437e-19 | 1.000000 |
| rad35                         | 3.02794e-19 | 1.000000 | 3.02794e-19 | 1.000000 |
| C2H2+PhCH2                    | 2.92727e-19 | 1.000000 | 2.92727e-19 | 1.000000 |
| rad45                         | 1.48671e-19 | 1.000000 | 1.48671e-19 | 1.000000 |
| rad10                         | 7.57342e-20 | 1.000000 | 7.57342e-20 | 1.000000 |
| PhCCH+CH3                     | 5.41762e-20 | 1.000000 | 5.41762e-20 | 1.000000 |
| rad36                         | 2.98099e-20 | 1.000000 | 2.98099e-20 | 1.000000 |
| rad3                          | 1.65475e-20 | 1.000000 | 1.65475e-20 | 1.000000 |
| rad4                          | 1.31682e-20 | 1.000000 | 1.31682e-20 | 1.000000 |
| rad13                         | 7.98845e-21 | 1.000000 | 7.98845e-21 | 1.000000 |
| PhCCCH3+H                     | 6.42782e-21 | 1.000000 | 6.42782e-21 | 1.000000 |
| Ph+MeAc                       | 4.56715e-21 | 1.000000 | 4.56715e-21 | 1.000000 |
| rad25                         | 1.66073e-21 | 1.000000 | 1.66073e-21 | 1.000000 |
| rad31                         | 1.24964e-21 | 1.000000 | 1.24964e-21 | 1.000000 |
| Ph+Allene                     | 9.08319e-22 | 1.000000 | 9.08319e-22 | 1.000000 |
| rad27                         | 8.86425e-22 | 1.000000 | 8.86425e-22 | 1.000000 |
| PhcycC3H3_B+H                 | 3.12046e-22 | 1.000000 | 3.12046e-22 | 1.000000 |
| rad33                         | 1.65212e-22 | 1.000000 | 1.65212e-22 | 1.000000 |
| PhCH2CCH+H                    | 1.27561e-22 | 1.000000 | 1.27561e-22 | 1.000000 |
| rad23                         | 3.90900e-23 | 1.000000 | 3.90900e-23 | 1.000000 |
| rad30                         | 4.60066e-24 | 1.000000 | 4.60066e-24 | 1.000000 |
| rad37                         | 6.71717e-26 | 1.000000 | 6.71717e-26 | 1.000000 |
| rad28                         | 4.02855e-26 | 1.000000 | 4.02855e-26 | 1.000000 |
| rad60syn                      | 1.08737e-26 | 1.000000 | 1.08737e-26 | 1.000000 |
| rad60anti                     | 5.07275e-27 | 1.000000 | 5.07275e-27 | 1.000000 |
| rad14                         | 3.31014e-27 | 1.000000 | 3.31014e-27 | 1.000000 |
| PAH3+H                        | 2.55017e-27 | 1.000000 | 2.55017e-27 | 1.000000 |
| PAH7+H                        | 1.01605e-27 | 1.000000 | 1.01605e-27 | 1.000000 |
| rad59                         | 5.61962e-28 | 1.000000 | 5.61962e-28 | 1.000000 |
| rad38                         | 1.05816e-28 | 1.000000 | 1.05816e-28 | 1.000000 |
| PAH10+CH3                     | 2.83982e-29 | 1.000000 | 2.83982e-29 | 1.000000 |
| rad46                         | 1.84128e-31 | 1.000000 | 1.84128e-31 | 1.000000 |
| rad43                         | 1.17621e-31 | 1.000000 | 1.17621e-31 | 1.000000 |
| rad58                         | 9.58367e-33 | 1.000000 | 9.58367e-33 | 1.000000 |
| rad70                         | 4.36712e-33 | 1.000000 | 4.36712e-33 | 1.000000 |
| rad54                         | 3.12823e-33 | 1.000000 | 3.12823e-33 | 1.000000 |
| PAH9+H                        | 1.37044e-33 | 1.000000 | 1.37044e-33 | 1.000000 |
| PAH1+H                        | 6.00430e-34 | 1.000000 | 6.00430e-34 | 1.000000 |
| rad50                         | 4.84083e-34 | 1.000000 | 4.84083e-34 | 1.000000 |
| rad39                         | 5.81947e-35 | 1.000000 | 5.81947e-35 | 1.000000 |
| rad34                         | 2.68341e-35 | 1.000000 | 2.68341e-35 | 1.000000 |
| rad55                         | 1.40786e-35 | 1.000000 | 1.40786e-35 | 1.000000 |
| rad52                         | 5.59088e-37 | 1.000000 | 5.59088e-37 | 1.000000 |
| rad41                         | 4.77196e-37 | 1.000000 | 4.77196e-37 | 1.000000 |
| rad62                         | 1.24532e-37 | 1.000000 | 1.24532e-37 | 1.000000 |
| rad51                         | 8.30525e-38 | 1.000000 | 8.30525e-38 | 1.000000 |
| rad47                         | 4.16971e-39 | 1.000000 | 4.16971e-39 | 1.000000 |
| rad42                         | 2.41338e-42 | 1.000000 | 2.41338e-42 | 1.000000 |
| rad65                         | 8.74511e-43 | 1.000000 | 8.74511e-43 | 1.000000 |
| rad53                         | 1.85456e-43 | 1.000000 | 1.85456e-43 | 1.000000 |
| rad61                         | 5.66049e-45 | 1.000000 | 5.66049e-45 | 1.000000 |
| Benzene+cycloprop-2-enylidene | 3.08591e-46 | 1.000000 | 3.08591e-46 | 1.000000 |
| rad68syn                      | 6.03803e-49 | 1.000000 | 6.03803e-49 | 1.000000 |
| rad68anti                     | 4.91731e-49 | 1.000000 | 4.91731e-49 | 1.000000 |
| rad56                         | 2.14753e-50 | 1.000000 | 2.14753e-50 | 1.000000 |
| rad64                         | 1.91328e-50 | 1.000000 | 1.91328e-50 | 1.000000 |
| rad40syn                      | 1.48012e-54 | 1.000000 | 1.48012e-54 | 1.000000 |
| rad40anti                     | 1.10884e-54 | 1.000000 | 1.10884e-54 | 1.000000 |
| PAH8+H                        | 3.89956e-57 | 1.000000 | 3.89956e-57 | 1.000000 |
| rad73                         | 4.75998e-59 | 1.000000 | 4.75998e-59 | 1.000000 |
| rad71                         | 3.37871e-64 | 1.000000 | 3.37871e-64 | 1.000000 |

Benzene+cycloprop-1-enylidene | 5.02895e-84 1.000000 | 5.02895e-84 1.000000

10000000.0 Pa, 30.0000000 K

| Rate constant             | True (fraction)        | Effective (fraction)   |
|---------------------------|------------------------|------------------------|
| Total                     | 8.13009e-20 (1.00 )    | 8.13009e-20 (1.00 )    |
| Formation of rad19        | 8.13009e-20 (1.00 )    | 8.13009e-20 (1.00 )    |
| H-abstraction to cyc2enyl | 1.08880e-49 (1.34e-30) | 1.08880e-49 (1.34e-30) |
| H-abstraction to cyclenyl | 7.55172e-75 (9.29e-56) | 7.55172e-75 (9.29e-56) |

| species                       | PYtrue      | Cumul    | PYeffective | Cumul    |
|-------------------------------|-------------|----------|-------------|----------|
| rad19anti                     | 0.966354    | 0.966354 | 0.966354    | 0.966354 |
| rad9                          | 0.0322834   | 0.998637 | 0.0322834   | 0.998637 |
| rad8                          | 0.00136210  | 1.000000 | 0.00136210  | 1.000000 |
| rad12                         | 5.01796e-07 | 1.000000 | 5.01796e-07 | 1.000000 |
| rad15                         | 4.60698e-07 | 1.000000 | 4.60698e-07 | 1.000000 |
| Indene+H                      | 1.15109e-10 | 1.000000 | 1.15109e-10 | 1.000000 |
| rad7                          | 5.75234e-11 | 1.000000 | 5.75234e-11 | 1.000000 |
| rad19syn                      | 1.18958e-11 | 1.000000 | 1.18958e-11 | 1.000000 |
| PhCHCCH2+H                    | 2.72554e-12 | 1.000000 | 2.72554e-12 | 1.000000 |
| rad11                         | 1.25149e-13 | 1.000000 | 1.25149e-13 | 1.000000 |
| rad2                          | 9.82055e-14 | 1.000000 | 9.82055e-14 | 1.000000 |
| rad6                          | 3.50944e-14 | 1.000000 | 3.50944e-14 | 1.000000 |
| rad1                          | 2.21835e-14 | 1.000000 | 2.21835e-14 | 1.000000 |
| rad5                          | 1.07482e-14 | 1.000000 | 1.07482e-14 | 1.000000 |
| rad21                         | 6.57953e-15 | 1.000000 | 6.57953e-15 | 1.000000 |
| PhcycC3H3_A+H                 | 2.08557e-15 | 1.000000 | 2.08557e-15 | 1.000000 |
| rad26                         | 1.86887e-15 | 1.000000 | 1.86887e-15 | 1.000000 |
| rad20                         | 1.31383e-15 | 1.000000 | 1.31383e-15 | 1.000000 |
| rad18                         | 7.31816e-16 | 1.000000 | 7.31816e-16 | 1.000000 |
| Phenyl+cycC3H4                | 5.63985e-17 | 1.000000 | 0.000000    | 1.000000 |
| rad22                         | 3.98115e-17 | 1.000000 | 3.98115e-17 | 1.000000 |
| rad24                         | 7.29452e-18 | 1.000000 | 7.29452e-18 | 1.000000 |
| rad67                         | 6.77685e-18 | 1.000000 | 6.77685e-18 | 1.000000 |
| rad35                         | 3.15679e-18 | 1.000000 | 3.15679e-18 | 1.000000 |
| rad45                         | 2.70183e-18 | 1.000000 | 2.70183e-18 | 1.000000 |
| C2H2+PhCH2                    | 1.51492e-18 | 1.000000 | 1.51492e-18 | 1.000000 |
| rad10                         | 6.81179e-19 | 1.000000 | 6.81179e-19 | 1.000000 |
| rad36                         | 4.57632e-19 | 1.000000 | 4.57632e-19 | 1.000000 |
| PhCCH+CH3                     | 2.77010e-19 | 1.000000 | 2.77010e-19 | 1.000000 |
| rad3                          | 1.56039e-19 | 1.000000 | 1.56039e-19 | 1.000000 |
| rad4                          | 1.18007e-19 | 1.000000 | 1.18007e-19 | 1.000000 |
| PhCCCH3+H                     | 5.52064e-20 | 1.000000 | 5.52064e-20 | 1.000000 |
| rad13                         | 4.26155e-20 | 1.000000 | 4.26155e-20 | 1.000000 |
| Ph+MeAc                       | 3.98922e-20 | 1.000000 | 3.98922e-20 | 1.000000 |
| rad25                         | 1.75169e-20 | 1.000000 | 1.75169e-20 | 1.000000 |
| Ph+Allene                     | 9.77544e-21 | 1.000000 | 9.77544e-21 | 1.000000 |
| rad27                         | 7.91493e-21 | 1.000000 | 7.91493e-21 | 1.000000 |
| PhCH2CCH+H                    | 1.38163e-21 | 1.000000 | 1.38163e-21 | 1.000000 |
| rad31                         | 1.29062e-21 | 1.000000 | 1.29062e-21 | 1.000000 |
| rad33                         | 8.74826e-22 | 1.000000 | 8.74826e-22 | 1.000000 |
| PhcycC3H3_B+H                 | 8.57567e-22 | 1.000000 | 8.57567e-22 | 1.000000 |
| rad23                         | 8.56010e-22 | 1.000000 | 8.56010e-22 | 1.000000 |
| rad30                         | 9.77077e-23 | 1.000000 | 9.77077e-23 | 1.000000 |
| rad37                         | 1.40860e-24 | 1.000000 | 1.40860e-24 | 1.000000 |
| rad28                         | 7.12863e-25 | 1.000000 | 7.12863e-25 | 1.000000 |
| rad60syn                      | 2.34884e-25 | 1.000000 | 2.34884e-25 | 1.000000 |
| rad60anti                     | 1.09733e-25 | 1.000000 | 1.09733e-25 | 1.000000 |
| rad14                         | 6.57497e-26 | 1.000000 | 6.57497e-26 | 1.000000 |
| PAH3+H                        | 5.60712e-26 | 1.000000 | 5.60712e-26 | 1.000000 |
| PAH7+H                        | 2.04783e-26 | 1.000000 | 2.04783e-26 | 1.000000 |
| rad59                         | 1.23298e-26 | 1.000000 | 1.23298e-26 | 1.000000 |
| rad38                         | 2.32780e-27 | 1.000000 | 2.32780e-27 | 1.000000 |
| PAH10+CH3                     | 6.24673e-28 | 1.000000 | 6.24673e-28 | 1.000000 |
| rad46                         | 6.78026e-30 | 1.000000 | 6.78026e-30 | 1.000000 |
| rad43                         | 2.00368e-30 | 1.000000 | 2.00368e-30 | 1.000000 |
| Benzene+cycloprop-2-enylidene | 1.33923e-30 | 1.000000 | 1.33923e-30 | 1.000000 |
| rad58                         | 2.21886e-31 | 1.000000 | 2.21886e-31 | 1.000000 |
| rad70                         | 1.01789e-31 | 1.000000 | 1.01789e-31 | 1.000000 |
| PAH9+H                        | 5.83023e-32 | 1.000000 | 5.83023e-32 | 1.000000 |
| rad54                         | 3.59746e-32 | 1.000000 | 3.59746e-32 | 1.000000 |
| rad50                         | 1.82628e-32 | 1.000000 | 1.82628e-32 | 1.000000 |
| PAH1+H                        | 1.38811e-32 | 1.000000 | 1.38811e-32 | 1.000000 |
| rad39                         | 2.26295e-33 | 1.000000 | 2.26295e-33 | 1.000000 |
| rad34                         | 6.42195e-34 | 1.000000 | 6.42195e-34 | 1.000000 |
| rad55                         | 1.64676e-34 | 1.000000 | 1.64676e-34 | 1.000000 |
| rad52                         | 3.33926e-35 | 1.000000 | 3.33926e-35 | 1.000000 |
| rad41                         | 8.39811e-36 | 1.000000 | 8.39811e-36 | 1.000000 |

|                               |             |         |             |         |
|-------------------------------|-------------|---------|-------------|---------|
| rad62                         | 5.39913e-36 | 1.00000 | 5.39913e-36 | 1.00000 |
| rad51                         | 5.12982e-36 | 1.00000 | 5.12982e-36 | 1.00000 |
| rad47                         | 1.74602e-37 | 1.00000 | 1.74602e-37 | 1.00000 |
| rad42                         | 1.12938e-40 | 1.00000 | 1.12938e-40 | 1.00000 |
| rad65                         | 3.83371e-41 | 1.00000 | 3.83371e-41 | 1.00000 |
| rad53                         | 2.14827e-42 | 1.00000 | 2.14827e-42 | 1.00000 |
| rad61                         | 1.39401e-43 | 1.00000 | 1.39401e-43 | 1.00000 |
| rad68syn                      | 1.60763e-47 | 1.00000 | 1.60763e-47 | 1.00000 |
| rad68anti                     | 1.30894e-47 | 1.00000 | 1.30894e-47 | 1.00000 |
| rad64                         | 9.08878e-49 | 1.00000 | 9.08878e-49 | 1.00000 |
| rad56                         | 2.09347e-49 | 1.00000 | 2.09347e-49 | 1.00000 |
| rad40syn                      | 4.93123e-53 | 1.00000 | 4.93123e-53 | 1.00000 |
| rad40anti                     | 3.73203e-53 | 1.00000 | 3.73203e-53 | 1.00000 |
| PAH8+H                        | 1.28729e-55 | 1.00000 | 1.28729e-55 | 1.00000 |
| Benzene+cycloprop-1-enylidene | 9.28861e-56 | 1.00000 | 9.28861e-56 | 1.00000 |
| rad73                         | 4.86343e-57 | 1.00000 | 4.86343e-57 | 1.00000 |
| rad71                         | 3.64062e-62 | 1.00000 | 3.64062e-62 | 1.00000 |

10000000.0 Pa, 40.0000000 K

| Rate constant             | True (fraction)        | Effective (fraction)   |
|---------------------------|------------------------|------------------------|
| Total                     | 2.24819e-18 (1.00 )    | 2.24819e-18 (1.00 )    |
| Formation of rad19        | 2.24819e-18 (1.00 )    | 2.24819e-18 (1.00 )    |
| H-abstraction to cyc2enyl | 1.72361e-40 (7.67e-23) | 1.72361e-40 (7.67e-23) |
| H-abstraction to cyclenyl | 2.48792e-59 (1.11e-41) | 2.48792e-59 (1.11e-41) |

| species                       | PYtrue      | Cumul    | PYeffective | Cumul    |
|-------------------------------|-------------|----------|-------------|----------|
| rad19anti                     | 0.950561    | 0.950561 | 0.950561    | 0.950561 |
| rad9                          | 0.0484296   | 0.998991 | 0.0484296   | 0.998991 |
| rad8                          | 0.00100771  | 0.999998 | 0.00100771  | 0.999998 |
| rad15                         | 1.05589e-06 | 0.999999 | 1.05589e-06 | 0.999999 |
| rad12                         | 9.18334e-07 | 1.00000  | 9.18334e-07 | 1.00000  |
| Indene+H                      | 4.00181e-10 | 1.00000  | 4.00181e-10 | 1.00000  |
| rad7                          | 6.44294e-11 | 1.00000  | 6.44294e-11 | 1.00000  |
| PhCHCCH2+H                    | 6.43346e-12 | 1.00000  | 6.43346e-12 | 1.00000  |
| rad11                         | 3.02676e-13 | 1.00000  | 3.02676e-13 | 1.00000  |
| rad2                          | 2.28515e-13 | 1.00000  | 2.28515e-13 | 1.00000  |
| rad6                          | 5.92245e-14 | 1.00000  | 5.92245e-14 | 1.00000  |
| rad1                          | 4.66184e-14 | 1.00000  | 4.66184e-14 | 1.00000  |
| rad19syn                      | 2.13874e-14 | 1.00000  | 2.13874e-14 | 1.00000  |
| rad5                          | 1.70030e-14 | 1.00000  | 1.70030e-14 | 1.00000  |
| rad21                         | 1.56356e-14 | 1.00000  | 1.56356e-14 | 1.00000  |
| rad26                         | 6.36976e-15 | 1.00000  | 6.36976e-15 | 1.00000  |
| PhcycC3H3_A+H                 | 3.53883e-15 | 1.00000  | 3.53883e-15 | 1.00000  |
| rad18                         | 2.61460e-15 | 1.00000  | 2.61460e-15 | 1.00000  |
| rad20                         | 2.27419e-15 | 1.00000  | 2.27419e-15 | 1.00000  |
| rad22                         | 1.41866e-16 | 1.00000  | 1.41866e-16 | 1.00000  |
| Phenyl+cycC3H4                | 1.07896e-16 | 1.00000  | 0.00000     | 1.00000  |
| rad67                         | 2.48405e-17 | 1.00000  | 2.48405e-17 | 1.00000  |
| rad24                         | 2.20959e-17 | 1.00000  | 2.20959e-17 | 1.00000  |
| rad45                         | 1.31984e-17 | 1.00000  | 1.31984e-17 | 1.00000  |
| rad35                         | 1.15489e-17 | 1.00000  | 1.15489e-17 | 1.00000  |
| C2H2+PhCH2                    | 3.78964e-18 | 1.00000  | 3.78964e-18 | 1.00000  |
| rad10                         | 2.42811e-18 | 1.00000  | 2.42811e-18 | 1.00000  |
| rad36                         | 2.03319e-18 | 1.00000  | 2.03319e-18 | 1.00000  |
| PhCCH+CH3                     | 6.75151e-19 | 1.00000  | 6.75151e-19 | 1.00000  |
| rad3                          | 5.68014e-19 | 1.00000  | 5.68014e-19 | 1.00000  |
| rad4                          | 4.16956e-19 | 1.00000  | 4.16956e-19 | 1.00000  |
| PhCCCH3+H                     | 1.87966e-19 | 1.00000  | 1.87966e-19 | 1.00000  |
| Ph+MeAc                       | 1.33259e-19 | 1.00000  | 1.33259e-19 | 1.00000  |
| rad13                         | 1.07752e-19 | 1.00000  | 1.07752e-19 | 1.00000  |
| rad25                         | 6.46916e-20 | 1.00000  | 6.46916e-20 | 1.00000  |
| Ph+Allene                     | 3.67523e-20 | 1.00000  | 3.67523e-20 | 1.00000  |
| rad27                         | 2.84083e-20 | 1.00000  | 2.84083e-20 | 1.00000  |
| PhCH2CCH+H                    | 5.23873e-21 | 1.00000  | 5.23873e-21 | 1.00000  |
| rad23                         | 4.95132e-21 | 1.00000  | 4.95132e-21 | 1.00000  |
| PhcycC3H3_B+H                 | 2.34847e-21 | 1.00000  | 2.34847e-21 | 1.00000  |
| rad33                         | 2.19574e-21 | 1.00000  | 2.19574e-21 | 1.00000  |
| rad31                         | 1.28210e-21 | 1.00000  | 1.28210e-21 | 1.00000  |
| rad30                         | 5.34740e-22 | 1.00000  | 5.34740e-22 | 1.00000  |
| Benzene+cycloprop-2-enylidene | 7.66665e-23 | 1.00000  | 7.66665e-23 | 1.00000  |
| rad37                         | 7.60431e-24 | 1.00000  | 7.60431e-24 | 1.00000  |
| rad28                         | 3.62014e-24 | 1.00000  | 3.62014e-24 | 1.00000  |
| rad60syn                      | 1.30552e-24 | 1.00000  | 1.30552e-24 | 1.00000  |
| rad60anti                     | 6.10733e-25 | 1.00000  | 6.10733e-25 | 1.00000  |
| rad14                         | 3.70033e-25 | 1.00000  | 3.70033e-25 | 1.00000  |
| PAH3+H                        | 3.17205e-25 | 1.00000  | 3.17205e-25 | 1.00000  |
| PAH7+H                        | 1.10890e-25 | 1.00000  | 1.10890e-25 | 1.00000  |



|                               |             |         |             |         |
|-------------------------------|-------------|---------|-------------|---------|
| rad59                         | 6.95964e-26 | 1.00000 | 6.95964e-26 | 1.00000 |
| rad38                         | 1.31778e-26 | 1.00000 | 1.31778e-26 | 1.00000 |
| PAH10+CH3                     | 3.55164e-27 | 1.00000 | 3.55164e-27 | 1.00000 |
| rad46                         | 5.14234e-29 | 1.00000 | 5.14234e-29 | 1.00000 |
| rad43                         | 1.11818e-29 | 1.00000 | 1.11818e-29 | 1.00000 |
| rad58                         | 1.33648e-30 | 1.00000 | 1.33648e-30 | 1.00000 |
| rad70                         | 6.16284e-31 | 1.00000 | 6.16284e-31 | 1.00000 |
| PAH9+H                        | 4.94559e-31 | 1.00000 | 4.94559e-31 | 1.00000 |
| rad54                         | 1.45411e-31 | 1.00000 | 1.45411e-31 | 1.00000 |
| rad50                         | 1.42374e-31 | 1.00000 | 1.42374e-31 | 1.00000 |
| PAH1+H                        | 8.46854e-32 | 1.00000 | 8.46854e-32 | 1.00000 |
| rad39                         | 1.81267e-32 | 1.00000 | 1.81267e-32 | 1.00000 |
| rad34                         | 4.05481e-33 | 1.00000 | 4.05481e-33 | 1.00000 |
| rad55                         | 6.82721e-34 | 1.00000 | 6.82721e-34 | 1.00000 |
| rad52                         | 3.23172e-34 | 1.00000 | 3.23172e-34 | 1.00000 |
| rad41                         | 5.24670e-35 | 1.00000 | 5.24670e-35 | 1.00000 |
| rad51                         | 5.13232e-35 | 1.00000 | 5.13232e-35 | 1.00000 |
| rad62                         | 4.96158e-35 | 1.00000 | 4.96158e-35 | 1.00000 |
| rad47                         | 1.54533e-36 | 1.00000 | 1.54533e-36 | 1.00000 |
| rad42                         | 1.17000e-39 | 1.00000 | 1.17000e-39 | 1.00000 |
| rad65                         | 3.45438e-40 | 1.00000 | 3.45438e-40 | 1.00000 |
| rad53                         | 1.16750e-41 | 1.00000 | 1.16750e-41 | 1.00000 |
| Benzene+cycloprop-1-enylidene | 1.10663e-41 | 1.00000 | 1.10663e-41 | 1.00000 |
| rad61                         | 1.29104e-42 | 1.00000 | 1.29104e-42 | 1.00000 |
| rad68syn                      | 1.72558e-46 | 1.00000 | 1.72558e-46 | 1.00000 |
| rad68anti                     | 1.40367e-46 | 1.00000 | 1.40367e-46 | 1.00000 |
| rad64                         | 1.09418e-47 | 1.00000 | 1.09418e-47 | 1.00000 |
| rad56                         | 1.23044e-48 | 1.00000 | 1.23044e-48 | 1.00000 |
| rad40syn                      | 7.12617e-52 | 1.00000 | 7.12617e-52 | 1.00000 |
| rad40anti                     | 5.41930e-52 | 1.00000 | 5.41930e-52 | 1.00000 |
| PAH8+H                        | 2.00531e-54 | 1.00000 | 2.00531e-54 | 1.00000 |
| rad73                         | 1.21718e-55 | 1.00000 | 1.21718e-55 | 1.00000 |
| rad71                         | 1.09041e-60 | 1.00000 | 1.09041e-60 | 1.00000 |

10000000.0 Pa, 50.0000000 K

=====

| Rate constant             | True (fraction)        | Effective (fraction)   |
|---------------------------|------------------------|------------------------|
| Total                     | 1.72707e-17 (1.00 )    | 1.72707e-17 (1.00 )    |
| Formation of rad19        | 1.72707e-17 (1.00 )    | 1.72707e-17 (1.00 )    |
| H-abstraction to cyc2enyl | 5.49905e-35 (3.18e-18) | 5.49905e-35 (3.18e-18) |
| H-abstraction to cyclenyl | 4.93090e-50 (2.86e-33) | 4.93090e-50 (2.86e-33) |

| species                       | PYtrue      | Cumul    | PYeffective | Cumul    |
|-------------------------------|-------------|----------|-------------|----------|
| rad19anti                     | 0.935447    | 0.935447 | 0.935447    | 0.935447 |
| rad9                          | 0.0637984   | 0.999245 | 0.0637984   | 0.999245 |
| rad8                          | 0.000751671 | 0.999997 | 0.000751671 | 0.999997 |
| rad15                         | 1.86705e-06 | 0.999999 | 1.86705e-06 | 0.999999 |
| rad12                         | 1.31936e-06 | 1.00000  | 1.31936e-06 | 1.00000  |
| Indene+H                      | 9.46509e-10 | 1.00000  | 9.46509e-10 | 1.00000  |
| rad7                          | 7.01711e-11 | 1.00000  | 7.01711e-11 | 1.00000  |
| PhCHCCH2+H                    | 1.17531e-11 | 1.00000  | 1.17531e-11 | 1.00000  |
| rad11                         | 5.60434e-13 | 1.00000  | 5.60434e-13 | 1.00000  |
| rad2                          | 4.15991e-13 | 1.00000  | 4.15991e-13 | 1.00000  |
| rad6                          | 8.60341e-14 | 1.00000  | 8.60341e-14 | 1.00000  |
| rad1                          | 7.91763e-14 | 1.00000  | 7.91763e-14 | 1.00000  |
| rad21                         | 2.87239e-14 | 1.00000  | 2.87239e-14 | 1.00000  |
| rad5                          | 2.32693e-14 | 1.00000  | 2.32693e-14 | 1.00000  |
| rad26                         | 1.47809e-14 | 1.00000  | 1.47809e-14 | 1.00000  |
| rad18                         | 6.34096e-15 | 1.00000  | 6.34096e-15 | 1.00000  |
| PhcycC3H3_A+H                 | 5.54780e-15 | 1.00000  | 5.54780e-15 | 1.00000  |
| rad20                         | 3.49143e-15 | 1.00000  | 3.49143e-15 | 1.00000  |
| rad22                         | 3.46384e-16 | 1.00000  | 3.46384e-16 | 1.00000  |
| rad19syn                      | 2.47013e-16 | 1.00000  | 2.47013e-16 | 1.00000  |
| Phenyl+cycC3H4                | 2.10175e-16 | 1.00000  | 0.00000     | 1.00000  |
| rad67                         | 6.16942e-17 | 1.00000  | 6.16942e-17 | 1.00000  |
| rad24                         | 4.63841e-17 | 1.00000  | 4.63841e-17 | 1.00000  |
| rad45                         | 3.92968e-17 | 1.00000  | 3.92968e-17 | 1.00000  |
| rad35                         | 2.86288e-17 | 1.00000  | 2.86288e-17 | 1.00000  |
| C2H2+PhCH2                    | 7.33599e-18 | 1.00000  | 7.33599e-18 | 1.00000  |
| rad10                         | 5.98773e-18 | 1.00000  | 5.98773e-18 | 1.00000  |
| rad36                         | 5.67369e-18 | 1.00000  | 5.67369e-18 | 1.00000  |
| Benzene+cycloprop-2-enylidene | 3.18404e-18 | 1.00000  | 3.18404e-18 | 1.00000  |
| rad3                          | 1.42076e-18 | 1.00000  | 1.42076e-18 | 1.00000  |
| PhCCH+CH3                     | 1.25810e-18 | 1.00000  | 1.25810e-18 | 1.00000  |
| rad4                          | 1.02195e-18 | 1.00000  | 1.02195e-18 | 1.00000  |
| PhCCCH3+H                     | 4.51574e-19 | 1.00000  | 4.51574e-19 | 1.00000  |
| Ph+MeAc                       | 3.14655e-19 | 1.00000  | 3.14655e-19 | 1.00000  |
| rad13                         | 2.07867e-19 | 1.00000  | 2.07867e-19 | 1.00000  |

|                               |             |         |             |         |
|-------------------------------|-------------|---------|-------------|---------|
| rad25                         | 1.61875e-19 | 1.00000 | 1.61875e-19 | 1.00000 |
| Ph+Allene                     | 9.36740e-20 | 1.00000 | 9.36740e-20 | 1.00000 |
| rad27                         | 7.06834e-20 | 1.00000 | 7.06834e-20 | 1.00000 |
| rad23                         | 1.71392e-20 | 1.00000 | 1.71392e-20 | 1.00000 |
| PhCH2CCH+H                    | 1.34831e-20 | 1.00000 | 1.34831e-20 | 1.00000 |
| PhcycC3H3_B+H                 | 6.94204e-21 | 1.00000 | 6.94204e-21 | 1.00000 |
| rad33                         | 4.20654e-21 | 1.00000 | 4.20654e-21 | 1.00000 |
| rad30                         | 1.75882e-21 | 1.00000 | 1.75882e-21 | 1.00000 |
| rad31                         | 1.33898e-21 | 1.00000 | 1.33898e-21 | 1.00000 |
| rad37                         | 2.47527e-23 | 1.00000 | 2.47527e-23 | 1.00000 |
| rad28                         | 1.14194e-23 | 1.00000 | 1.14194e-23 | 1.00000 |
| rad60syn                      | 4.36425e-24 | 1.00000 | 4.36425e-24 | 1.00000 |
| rad60anti                     | 2.04458e-24 | 1.00000 | 2.04458e-24 | 1.00000 |
| rad14                         | 1.26713e-24 | 1.00000 | 1.26713e-24 | 1.00000 |
| PAH3+H                        | 1.08097e-24 | 1.00000 | 1.08097e-24 | 1.00000 |
| PAH7+H                        | 3.66450e-25 | 1.00000 | 3.66450e-25 | 1.00000 |
| rad59                         | 2.36579e-25 | 1.00000 | 2.36579e-25 | 1.00000 |
| rad38                         | 4.49983e-26 | 1.00000 | 4.49983e-26 | 1.00000 |
| PAH10+CH3                     | 1.22436e-26 | 1.00000 | 1.22436e-26 | 1.00000 |
| rad46                         | 2.14357e-28 | 1.00000 | 2.14357e-28 | 1.00000 |
| rad43                         | 3.97205e-29 | 1.00000 | 3.97205e-29 | 1.00000 |
| rad58                         | 4.89808e-30 | 1.00000 | 4.89808e-30 | 1.00000 |
| rad70                         | 2.27132e-30 | 1.00000 | 2.27132e-30 | 1.00000 |
| PAH9+H                        | 2.26622e-30 | 1.00000 | 2.26622e-30 | 1.00000 |
| rad50                         | 6.12462e-31 | 1.00000 | 6.12462e-31 | 1.00000 |
| rad54                         | 4.01577e-31 | 1.00000 | 4.01577e-31 | 1.00000 |
| PAH1+H                        | 3.17707e-31 | 1.00000 | 3.17707e-31 | 1.00000 |
| rad39                         | 7.97346e-32 | 1.00000 | 7.97346e-32 | 1.00000 |
| rad34                         | 1.57413e-32 | 1.00000 | 1.57413e-32 | 1.00000 |
| Benzene+cycloprop-1-enylidene | 2.85507e-33 | 1.00000 | 2.85507e-33 | 1.00000 |
| rad55                         | 1.94456e-33 | 1.00000 | 1.94456e-33 | 1.00000 |
| rad52                         | 1.59440e-33 | 1.00000 | 1.59440e-33 | 1.00000 |
| rad51                         | 2.62075e-34 | 1.00000 | 2.62075e-34 | 1.00000 |
| rad62                         | 2.50213e-34 | 1.00000 | 2.50213e-34 | 1.00000 |
| rad41                         | 2.17993e-34 | 1.00000 | 2.17993e-34 | 1.00000 |
| rad47                         | 7.68606e-36 | 1.00000 | 7.68606e-36 | 1.00000 |
| rad42                         | 6.84735e-39 | 1.00000 | 6.84735e-39 | 1.00000 |
| rad65                         | 1.71783e-39 | 1.00000 | 1.71783e-39 | 1.00000 |
| rad53                         | 5.13700e-41 | 1.00000 | 5.13700e-41 | 1.00000 |
| rad61                         | 9.28880e-42 | 1.00000 | 9.28880e-42 | 1.00000 |
| rad68syn                      | 1.50797e-45 | 1.00000 | 1.50797e-45 | 1.00000 |
| rad68anti                     | 1.22488e-45 | 1.00000 | 1.22488e-45 | 1.00000 |
| rad64                         | 8.42800e-47 | 1.00000 | 8.42800e-47 | 1.00000 |
| rad56                         | 6.63912e-48 | 1.00000 | 6.63912e-48 | 1.00000 |
| rad40syn                      | 9.02418e-51 | 1.00000 | 9.02418e-51 | 1.00000 |
| rad40anti                     | 6.88020e-51 | 1.00000 | 6.88020e-51 | 1.00000 |
| PAH8+H                        | 2.93316e-53 | 1.00000 | 2.93316e-53 | 1.00000 |
| rad73                         | 2.11811e-54 | 1.00000 | 2.11811e-54 | 1.00000 |
| rad71                         | 2.52271e-59 | 1.00000 | 2.52271e-59 | 1.00000 |

10000000.0 Pa, 60.0000000 K

=====

| Rate constant             | True (fraction)        | Effective (fraction)   |
|---------------------------|------------------------|------------------------|
| Total                     | 6.93738e-17 (1.00 )    | 6.93738e-17 (1.00 )    |
| Formation of rad19        | 6.93738e-17 (1.000 )   | 6.93738e-17 (1.000 )   |
| H-abstraction to cyc2enyl | 2.50609e-31 (3.61e-15) | 2.50609e-31 (3.61e-15) |
| H-abstraction to cyclenyl | 7.62015e-44 (1.10e-27) | 7.62015e-44 (1.10e-27) |

| species                       | PYtrue      | Cumul    | PYeffective | Cumul    |
|-------------------------------|-------------|----------|-------------|----------|
| rad19anti                     | 0.920852    | 0.920852 | 0.920852    | 0.920852 |
| rad9                          | 0.0785768   | 0.999429 | 0.0785768   | 0.999429 |
| rad8                          | 0.000566650 | 0.999995 | 0.000566650 | 0.999995 |
| rad15                         | 2.88408e-06 | 0.999998 | 2.88408e-06 | 0.999998 |
| rad12                         | 1.68023e-06 | 1.00000  | 1.68023e-06 | 1.00000  |
| Indene+H                      | 1.83064e-09 | 1.00000  | 1.83064e-09 | 1.00000  |
| rad7                          | 7.56291e-11 | 1.00000  | 7.56291e-11 | 1.00000  |
| PhCHCCH2+H                    | 1.87933e-11 | 1.00000  | 1.87933e-11 | 1.00000  |
| rad11                         | 9.04378e-13 | 1.00000  | 9.04378e-13 | 1.00000  |
| rad2                          | 6.65520e-13 | 1.00000  | 6.65520e-13 | 1.00000  |
| rad1                          | 1.20260e-13 | 1.00000  | 1.20260e-13 | 1.00000  |
| rad6                          | 1.15968e-13 | 1.00000  | 1.15968e-13 | 1.00000  |
| rad21                         | 4.61847e-14 | 1.00000  | 4.61847e-14 | 1.00000  |
| rad5                          | 2.96292e-14 | 1.00000  | 2.96292e-14 | 1.00000  |
| rad26                         | 2.81197e-14 | 1.00000  | 2.81197e-14 | 1.00000  |
| rad18                         | 1.25707e-14 | 1.00000  | 1.25707e-14 | 1.00000  |
| PhcycC3H3_A+H                 | 8.34447e-15 | 1.00000  | 8.34447e-15 | 1.00000  |
| rad20                         | 5.07662e-15 | 1.00000  | 5.07662e-15 | 1.00000  |
| Benzene+cycloprop-2-enylidene | 3.61245e-15 | 1.00000  | 3.61245e-15 | 1.00000  |

|                               |             |         |             |         |
|-------------------------------|-------------|---------|-------------|---------|
| rad22                         | 6.94283e-16 | 1.00000 | 6.94283e-16 | 1.00000 |
| Phenyl+cycC3H4                | 3.92093e-16 | 1.00000 | 0.00000     | 1.00000 |
| rad67                         | 1.25231e-16 | 1.00000 | 1.25231e-16 | 1.00000 |
| rad45                         | 9.04729e-17 | 1.00000 | 9.04729e-17 | 1.00000 |
| rad24                         | 8.06780e-17 | 1.00000 | 8.06780e-17 | 1.00000 |
| rad35                         | 5.80006e-17 | 1.00000 | 5.80006e-17 | 1.00000 |
| C2H2+PhCH2                    | 1.25160e-17 | 1.00000 | 1.25160e-17 | 1.00000 |
| rad36                         | 1.24422e-17 | 1.00000 | 1.24422e-17 | 1.00000 |
| rad10                         | 1.21411e-17 | 1.00000 | 1.21411e-17 | 1.00000 |
| rad19syn                      | 9.17840e-18 | 1.00000 | 9.17840e-18 | 1.00000 |
| rad3                          | 2.91280e-18 | 1.00000 | 2.91280e-18 | 1.00000 |
| rad4                          | 2.06352e-18 | 1.00000 | 2.06352e-18 | 1.00000 |
| PhCCH+CH3                     | 2.04372e-18 | 1.00000 | 2.04372e-18 | 1.00000 |
| PhCCCH3+H                     | 9.03912e-19 | 1.00000 | 9.03912e-19 | 1.00000 |
| Ph+MeAc                       | 6.21987e-19 | 1.00000 | 6.21987e-19 | 1.00000 |
| rad13                         | 3.49129e-19 | 1.00000 | 3.49129e-19 | 1.00000 |
| rad25                         | 3.31128e-19 | 1.00000 | 3.31128e-19 | 1.00000 |
| Ph+Allene                     | 1.95353e-19 | 1.00000 | 1.95353e-19 | 1.00000 |
| rad27                         | 1.44657e-19 | 1.00000 | 1.44657e-19 | 1.00000 |
| rad23                         | 4.52014e-20 | 1.00000 | 4.52014e-20 | 1.00000 |
| PhCH2CCH+H                    | 2.84197e-20 | 1.00000 | 2.84197e-20 | 1.00000 |
| PhcycC3H3_B+H                 | 2.19405e-20 | 1.00000 | 2.19405e-20 | 1.00000 |
| rad33                         | 7.01874e-21 | 1.00000 | 7.01874e-21 | 1.00000 |
| rad30                         | 4.43721e-21 | 1.00000 | 4.43721e-21 | 1.00000 |
| rad31                         | 1.44155e-21 | 1.00000 | 1.44155e-21 | 1.00000 |
| rad37                         | 6.20025e-23 | 1.00000 | 6.20025e-23 | 1.00000 |
| rad28                         | 2.80680e-23 | 1.00000 | 2.80680e-23 | 1.00000 |
| rad60syn                      | 1.12011e-23 | 1.00000 | 1.12011e-23 | 1.00000 |
| rad60anti                     | 5.25563e-24 | 1.00000 | 5.25563e-24 | 1.00000 |
| rad14                         | 3.33297e-24 | 1.00000 | 3.33297e-24 | 1.00000 |
| PAH3+H                        | 2.83241e-24 | 1.00000 | 2.83241e-24 | 1.00000 |
| PAH7+H                        | 9.37164e-25 | 1.00000 | 9.37164e-25 | 1.00000 |
| rad59                         | 6.18211e-25 | 1.00000 | 6.18211e-25 | 1.00000 |
| rad38                         | 1.18259e-25 | 1.00000 | 1.18259e-25 | 1.00000 |
| PAH10+CH3                     | 3.26293e-26 | 1.00000 | 3.26293e-26 | 1.00000 |
| Benzene+cycloprop-1-enylidene | 1.09842e-27 | 1.00000 | 1.09842e-27 | 1.00000 |
| rad46                         | 6.53733e-28 | 1.00000 | 6.53733e-28 | 1.00000 |
| rad43                         | 1.10549e-28 | 1.00000 | 1.10549e-28 | 1.00000 |
| rad58                         | 1.39089e-29 | 1.00000 | 1.39089e-29 | 1.00000 |
| PAH9+H                        | 7.51463e-30 | 1.00000 | 7.51463e-30 | 1.00000 |
| rad70                         | 6.49096e-30 | 1.00000 | 6.49096e-30 | 1.00000 |
| rad50                         | 1.93399e-30 | 1.00000 | 1.93399e-30 | 1.00000 |
| PAH1+H                        | 9.30320e-31 | 1.00000 | 9.30320e-31 | 1.00000 |
| rad54                         | 9.13043e-31 | 1.00000 | 9.13043e-31 | 1.00000 |
| rad39                         | 2.56639e-31 | 1.00000 | 2.56639e-31 | 1.00000 |
| rad34                         | 4.77066e-32 | 1.00000 | 4.77066e-32 | 1.00000 |
| rad52                         | 5.57101e-33 | 1.00000 | 5.57101e-33 | 1.00000 |
| rad55                         | 4.57779e-33 | 1.00000 | 4.57779e-33 | 1.00000 |
| rad51                         | 9.49233e-34 | 1.00000 | 9.49233e-34 | 1.00000 |
| rad62                         | 9.19474e-34 | 1.00000 | 9.19474e-34 | 1.00000 |
| rad41                         | 7.27523e-34 | 1.00000 | 7.27523e-34 | 1.00000 |
| rad47                         | 2.84662e-35 | 1.00000 | 2.84662e-35 | 1.00000 |
| rad42                         | 2.97603e-38 | 1.00000 | 2.97603e-38 | 1.00000 |
| rad65                         | 6.28340e-39 | 1.00000 | 6.28340e-39 | 1.00000 |
| rad53                         | 2.11376e-40 | 1.00000 | 2.11376e-40 | 1.00000 |
| rad61                         | 6.19101e-41 | 1.00000 | 6.19101e-41 | 1.00000 |
| rad68syn                      | 1.26590e-44 | 1.00000 | 1.26590e-44 | 1.00000 |
| rad68anti                     | 1.02632e-44 | 1.00000 | 1.02632e-44 | 1.00000 |
| rad64                         | 5.31934e-46 | 1.00000 | 5.31934e-46 | 1.00000 |
| rad56                         | 3.71550e-47 | 1.00000 | 3.71550e-47 | 1.00000 |
| rad40syn                      | 1.16776e-49 | 1.00000 | 1.16776e-49 | 1.00000 |
| rad40anti                     | 8.91412e-50 | 1.00000 | 8.91412e-50 | 1.00000 |
| PAH8+H                        | 4.63931e-52 | 1.00000 | 4.63931e-52 | 1.00000 |
| rad73                         | 3.31699e-53 | 1.00000 | 3.31699e-53 | 1.00000 |
| rad71                         | 5.72663e-58 | 1.00000 | 5.72663e-58 | 1.00000 |

10000000.0 Pa, 70.0000000 K

| Rate constant             | True (fraction)        | Effective (fraction)   |             |          |
|---------------------------|------------------------|------------------------|-------------|----------|
| Total                     | 1.91520e-16 (1.00 )    | 1.91520e-16 (1.00 )    |             |          |
| Formation of rad19        | 1.91520e-16 (1.000 )   | 1.91520e-16 (1.000 )   |             |          |
| H-abstraction to cyc2enyl | 1.01125e-28 (5.28e-13) | 1.01125e-28 (5.28e-13) |             |          |
| H-abstraction to cyclenyl | 1.97822e-39 (1.03e-23) | 1.97822e-39 (1.03e-23) |             |          |
| species                   | PYtrue                 | Cumul                  | PYeffective | Cumul    |
| rad19anti                 | 0.906659               | 0.906659               | 0.906659    | 0.906659 |
| rad9                      | 0.0929031              | 0.999562               | 0.0929031   | 0.999562 |
| rad8                      | 0.000431474            | 0.999994               | 0.000431474 | 0.999994 |

|                               |             |          |             |          |
|-------------------------------|-------------|----------|-------------|----------|
| rad15                         | 4.10301e-06 | 0.999998 | 4.10301e-06 | 0.999998 |
| rad12                         | 1.99512e-06 | 1.000000 | 1.99512e-06 | 1.000000 |
| Indene+H                      | 3.13173e-09 | 1.000000 | 3.13173e-09 | 1.000000 |
| rad7                          | 8.11503e-11 | 1.000000 | 8.11503e-11 | 1.000000 |
| PhCHCCH2+H                    | 2.77214e-11 | 1.000000 | 2.77214e-11 | 1.000000 |
| rad11                         | 1.34348e-12 | 1.000000 | 1.34348e-12 | 1.000000 |
| rad2                          | 9.84103e-13 | 1.000000 | 9.84103e-13 | 1.000000 |
| Benzene+cycloprop-2-enylidene | 5.28015e-13 | 1.000000 | 5.28015e-13 | 1.000000 |
| rad1                          | 1.70671e-13 | 1.000000 | 1.70671e-13 | 1.000000 |
| rad6                          | 1.49619e-13 | 1.000000 | 1.49619e-13 | 1.000000 |
| rad21                         | 6.85291e-14 | 1.000000 | 6.85291e-14 | 1.000000 |
| rad26                         | 4.74590e-14 | 1.000000 | 4.74590e-14 | 1.000000 |
| rad5                          | 3.61692e-14 | 1.000000 | 3.61692e-14 | 1.000000 |
| rad18                         | 2.20516e-14 | 1.000000 | 2.20516e-14 | 1.000000 |
| PhcycC3H3_A+H                 | 1.22538e-14 | 1.000000 | 1.22538e-14 | 1.000000 |
| rad20                         | 7.16010e-15 | 1.000000 | 7.16010e-15 | 1.000000 |
| rad22                         | 1.23462e-15 | 1.000000 | 1.23462e-15 | 1.000000 |
| Phenyl+cycC3H4                | 6.95493e-16 | 1.000000 | 0.00000     | 1.000000 |
| rad67                         | 2.25041e-16 | 1.000000 | 2.25041e-16 | 1.000000 |
| rad45                         | 1.78375e-16 | 1.000000 | 1.78375e-16 | 1.000000 |
| rad24                         | 1.25459e-16 | 1.000000 | 1.25459e-16 | 1.000000 |
| rad35                         | 1.04020e-16 | 1.000000 | 1.04020e-16 | 1.000000 |
| rad36                         | 2.36015e-17 | 1.000000 | 2.36015e-17 | 1.000000 |
| rad10                         | 2.18453e-17 | 1.000000 | 2.18453e-17 | 1.000000 |
| C2H2+PhCH2                    | 1.98723e-17 | 1.000000 | 1.98723e-17 | 1.000000 |
| rad3                          | 5.28984e-18 | 1.000000 | 5.28984e-18 | 1.000000 |
| rad4                          | 3.70258e-18 | 1.000000 | 3.70258e-18 | 1.000000 |
| PhCCH+CH3                     | 3.05903e-18 | 1.000000 | 3.05903e-18 | 1.000000 |
| PhCCCH3+H                     | 1.61983e-18 | 1.000000 | 1.61983e-18 | 1.000000 |
| Ph+MeAc                       | 1.10543e-18 | 1.000000 | 1.10543e-18 | 1.000000 |
| rad19syn                      | 7.51663e-19 | 1.000000 | 7.51663e-19 | 1.000000 |
| rad25                         | 5.99882e-19 | 1.000000 | 5.99882e-19 | 1.000000 |
| rad13                         | 5.39883e-19 | 1.000000 | 5.39883e-19 | 1.000000 |
| Ph+Allene                     | 3.61196e-19 | 1.000000 | 3.61196e-19 | 1.000000 |
| rad27                         | 2.62752e-19 | 1.000000 | 2.62752e-19 | 1.000000 |
| rad23                         | 1.00906e-19 | 1.000000 | 1.00906e-19 | 1.000000 |
| PhcycC3H3_B+H                 | 7.32650e-20 | 1.000000 | 7.32650e-20 | 1.000000 |
| PhCH2CCH+H                    | 5.31552e-20 | 1.000000 | 5.31552e-20 | 1.000000 |
| rad33                         | 1.07854e-20 | 1.000000 | 1.07854e-20 | 1.000000 |
| rad30                         | 9.53262e-21 | 1.000000 | 9.53262e-21 | 1.000000 |
| rad31                         | 1.57975e-21 | 1.000000 | 1.57975e-21 | 1.000000 |
| rad37                         | 1.32666e-22 | 1.000000 | 1.32666e-22 | 1.000000 |
| rad28                         | 5.93174e-23 | 1.000000 | 5.93174e-23 | 1.000000 |
| rad60syn                      | 2.45077e-23 | 1.000000 | 2.45077e-23 | 1.000000 |
| rad60anti                     | 1.15181e-23 | 1.000000 | 1.15181e-23 | 1.000000 |
| Benzene+cycloprop-1-enylidene | 1.03290e-23 | 1.000000 | 1.03290e-23 | 1.000000 |
| rad14                         | 7.46632e-24 | 1.000000 | 7.46632e-24 | 1.000000 |
| PAH3+H                        | 6.33677e-24 | 1.000000 | 6.33677e-24 | 1.000000 |
| PAH7+H                        | 2.05486e-24 | 1.000000 | 2.05486e-24 | 1.000000 |
| rad59                         | 1.37899e-24 | 1.000000 | 1.37899e-24 | 1.000000 |
| rad38                         | 2.65577e-25 | 1.000000 | 2.65577e-25 | 1.000000 |
| PAH10+CH3                     | 7.46163e-26 | 1.000000 | 7.46163e-26 | 1.000000 |
| rad46                         | 1.65066e-27 | 1.000000 | 1.65066e-27 | 1.000000 |
| rad43                         | 2.65195e-28 | 1.000000 | 2.65195e-28 | 1.000000 |
| rad58                         | 3.39641e-29 | 1.000000 | 3.39641e-29 | 1.000000 |
| PAH9+H                        | 2.04754e-29 | 1.000000 | 2.04754e-29 | 1.000000 |
| rad70                         | 1.59672e-29 | 1.000000 | 1.59672e-29 | 1.000000 |
| rad50                         | 5.07230e-30 | 1.000000 | 5.07230e-30 | 1.000000 |
| PAH1+H                        | 2.35655e-30 | 1.000000 | 2.35655e-30 | 1.000000 |
| rad54                         | 1.85228e-30 | 1.000000 | 1.85228e-30 | 1.000000 |
| rad39                         | 6.84776e-31 | 1.000000 | 6.84776e-31 | 1.000000 |
| rad34                         | 1.25154e-31 | 1.000000 | 1.25154e-31 | 1.000000 |
| rad52                         | 1.58684e-32 | 1.000000 | 1.58684e-32 | 1.000000 |
| rad55                         | 9.65005e-33 | 1.000000 | 9.65005e-33 | 1.000000 |
| rad51                         | 2.80830e-33 | 1.000000 | 2.80830e-33 | 1.000000 |
| rad62                         | 2.79501e-33 | 1.000000 | 2.79501e-33 | 1.000000 |
| rad41                         | 2.12948e-33 | 1.000000 | 2.12948e-33 | 1.000000 |
| rad47                         | 8.87542e-35 | 1.000000 | 8.87542e-35 | 1.000000 |
| rad42                         | 1.08603e-37 | 1.000000 | 1.08603e-37 | 1.000000 |
| rad65                         | 1.91681e-38 | 1.000000 | 1.91681e-38 | 1.000000 |
| rad53                         | 8.65740e-40 | 1.000000 | 8.65740e-40 | 1.000000 |
| rad61                         | 4.08828e-40 | 1.000000 | 4.08828e-40 | 1.000000 |
| rad68syn                      | 1.08397e-43 | 1.000000 | 1.08397e-43 | 1.000000 |
| rad68anti                     | 8.76852e-44 | 1.000000 | 8.76852e-44 | 1.000000 |
| rad64                         | 3.04749e-45 | 1.000000 | 3.04749e-45 | 1.000000 |
| rad56                         | 2.34583e-46 | 1.000000 | 2.34583e-46 | 1.000000 |
| rad40syn                      | 1.61529e-48 | 1.000000 | 1.61529e-48 | 1.000000 |
| rad40anti                     | 1.23341e-48 | 1.000000 | 1.23341e-48 | 1.000000 |
| PAH8+H                        | 8.21098e-51 | 1.000000 | 8.21098e-51 | 1.000000 |
| rad73                         | 5.14295e-52 | 1.000000 | 5.14295e-52 | 1.000000 |

rad71 | 1.37865e-56 1.000000 | 1.37865e-56 1.000000

10000000.0 Pa, 80.0000000 K

=====

| Rate constant             | True (fraction)        | Effective (fraction)   |
|---------------------------|------------------------|------------------------|
| Total                     | 4.17084e-16 (1.00 )    | 4.17084e-16 (1.00 )    |
| Formation of rad19        | 4.17084e-16 (1.000 )   | 4.17084e-16 (1.000 )   |
| H-abstraction to cyc2enyl | 8.98751e-27 (2.15e-11) | 8.98751e-27 (2.15e-11) |
| H-abstraction to cyc1enyl | 4.00120e-36 (9.59e-21) | 4.00120e-36 (9.59e-21) |

| species                       | PYtrue      | Cumul    | PYeffective | Cumul    |
|-------------------------------|-------------|----------|-------------|----------|
| rad19anti                     | 0.892776    | 0.892776 | 0.892776    | 0.892776 |
| rad9                          | 0.106885    | 0.999661 | 0.106885    | 0.999661 |
| rad8                          | 0.000331513 | 0.999993 | 0.000331513 | 0.999993 |
| rad15                         | 5.52480e-06 | 0.999998 | 5.52480e-06 | 0.999998 |
| rad12                         | 2.26600e-06 | 1.00000  | 2.26600e-06 | 1.00000  |
| Indene+H                      | 4.93610e-09 | 1.00000  | 4.93610e-09 | 1.00000  |
| rad7                          | 8.69328e-11 | 1.00000  | 8.69328e-11 | 1.00000  |
| PhCHCCH2+H                    | 3.87695e-11 | 1.00000  | 3.87695e-11 | 1.00000  |
| Benzene+cycloprop-2-enylidene | 2.15484e-11 | 1.00000  | 2.15484e-11 | 1.00000  |
| rad11                         | 1.89011e-12 | 1.00000  | 1.89011e-12 | 1.00000  |
| rad2                          | 1.38119e-12 | 1.00000  | 1.38119e-12 | 1.00000  |
| rad1                          | 2.31597e-13 | 1.00000  | 2.31597e-13 | 1.00000  |
| rad6                          | 1.87739e-13 | 1.00000  | 1.87739e-13 | 1.00000  |
| rad21                         | 9.64643e-14 | 1.00000  | 9.64643e-14 | 1.00000  |
| rad26                         | 7.40232e-14 | 1.00000  | 7.40232e-14 | 1.00000  |
| rad5                          | 4.29803e-14 | 1.00000  | 4.29803e-14 | 1.00000  |
| rad18                         | 3.56693e-14 | 1.00000  | 3.56693e-14 | 1.00000  |
| PhcycC3H3_A+H                 | 1.77436e-14 | 1.00000  | 1.77436e-14 | 1.00000  |
| rad20                         | 9.90111e-15 | 1.00000  | 9.90111e-15 | 1.00000  |
| rad22                         | 2.02857e-15 | 1.00000  | 2.02857e-15 | 1.00000  |
| Phenyl+cycC3H4                | 1.17951e-15 | 1.00000  | 0.00000     | 1.00000  |
| rad67                         | 3.73221e-16 | 1.00000  | 3.73221e-16 | 1.00000  |
| rad45                         | 3.17605e-16 | 1.00000  | 3.17605e-16 | 1.00000  |
| rad24                         | 1.81427e-16 | 1.00000  | 1.81427e-16 | 1.00000  |
| rad35                         | 1.72152e-16 | 1.00000  | 1.72152e-16 | 1.00000  |
| rad36                         | 4.07074e-17 | 1.00000  | 4.07074e-17 | 1.00000  |
| rad10                         | 3.63174e-17 | 1.00000  | 3.63174e-17 | 1.00000  |
| C2H2+PhCH2                    | 3.01920e-17 | 1.00000  | 3.01920e-17 | 1.00000  |
| rad3                          | 8.86690e-18 | 1.00000  | 8.86690e-18 | 1.00000  |
| rad4                          | 6.14506e-18 | 1.00000  | 6.14506e-18 | 1.00000  |
| PhCCH+CH3                     | 4.34195e-18 | 1.00000  | 4.34195e-18 | 1.00000  |
| PhCCCH3+H                     | 2.69916e-18 | 1.00000  | 2.69916e-18 | 1.00000  |
| Ph+MeAc                       | 1.83332e-18 | 1.00000  | 1.83332e-18 | 1.00000  |
| rad25                         | 1.00348e-18 | 1.00000  | 1.00348e-18 | 1.00000  |
| rad13                         | 7.91341e-19 | 1.00000  | 7.91341e-19 | 1.00000  |
| Ph+Allene                     | 6.17438e-19 | 1.00000  | 6.17438e-19 | 1.00000  |
| rad27                         | 4.41086e-19 | 1.00000  | 4.41086e-19 | 1.00000  |
| PhcycC3H3_B+H                 | 2.51325e-19 | 1.00000  | 2.51325e-19 | 1.00000  |
| rad23                         | 2.01588e-19 | 1.00000  | 2.01588e-19 | 1.00000  |
| rad19syn                      | 1.08336e-19 | 1.00000  | 1.08336e-19 | 1.00000  |
| PhCH2CCH+H                    | 9.20013e-20 | 1.00000  | 9.20013e-20 | 1.00000  |
| rad30                         | 1.84179e-20 | 1.00000  | 1.84179e-20 | 1.00000  |
| rad33                         | 1.57135e-20 | 1.00000  | 1.57135e-20 | 1.00000  |
| Benzene+cycloprop-1-enylidene | 9.59328e-21 | 1.00000  | 9.59328e-21 | 1.00000  |
| rad31                         | 1.75129e-21 | 1.00000  | 1.75129e-21 | 1.00000  |
| rad37                         | 2.56063e-22 | 1.00000  | 2.56063e-22 | 1.00000  |
| rad28                         | 1.13529e-22 | 1.00000  | 1.13529e-22 | 1.00000  |
| rad60syn                      | 4.82855e-23 | 1.00000  | 4.82855e-23 | 1.00000  |
| rad60anti                     | 2.27332e-23 | 1.00000  | 2.27332e-23 | 1.00000  |
| rad14                         | 1.50492e-23 | 1.00000  | 1.50492e-23 | 1.00000  |
| PAH3+H                        | 1.27879e-23 | 1.00000  | 1.27879e-23 | 1.00000  |
| PAH7+H                        | 4.07662e-24 | 1.00000  | 4.07662e-24 | 1.00000  |
| rad59                         | 2.77391e-24 | 1.00000  | 2.77391e-24 | 1.00000  |
| rad38                         | 5.38386e-25 | 1.00000  | 5.38386e-25 | 1.00000  |
| PAH10+CH3                     | 1.54668e-25 | 1.00000  | 1.54668e-25 | 1.00000  |
| rad46                         | 3.68266e-27 | 1.00000  | 3.68266e-27 | 1.00000  |
| rad43                         | 5.77802e-28 | 1.00000  | 5.77802e-28 | 1.00000  |
| rad58                         | 7.53566e-29 | 1.00000  | 7.53566e-29 | 1.00000  |
| PAH9+H                        | 4.90311e-29 | 1.00000  | 4.90311e-29 | 1.00000  |
| rad70                         | 3.57308e-29 | 1.00000  | 3.57308e-29 | 1.00000  |
| rad50                         | 1.17935e-29 | 1.00000  | 1.17935e-29 | 1.00000  |
| PAH1+H                        | 5.45219e-30 | 1.00000  | 5.45219e-30 | 1.00000  |
| rad54                         | 3.49909e-30 | 1.00000  | 3.49909e-30 | 1.00000  |
| rad39                         | 1.61815e-30 | 1.00000  | 1.61815e-30 | 1.00000  |
| rad34                         | 3.00239e-31 | 1.00000  | 3.00239e-31 | 1.00000  |
| rad52                         | 3.96572e-32 | 1.00000  | 3.96572e-32 | 1.00000  |
| rad55                         | 1.90112e-32 | 1.00000  | 1.90112e-32 | 1.00000  |

|           |             |         |             |         |
|-----------|-------------|---------|-------------|---------|
| rad62     | 7.52721e-33 | 1.00000 | 7.52721e-33 | 1.00000 |
| rad51     | 7.30739e-33 | 1.00000 | 7.30739e-33 | 1.00000 |
| rad41     | 5.74127e-33 | 1.00000 | 5.74127e-33 | 1.00000 |
| rad47     | 2.48692e-34 | 1.00000 | 2.48692e-34 | 1.00000 |
| rad42     | 3.55745e-37 | 1.00000 | 3.55745e-37 | 1.00000 |
| rad65     | 5.21605e-38 | 1.00000 | 5.21605e-38 | 1.00000 |
| rad53     | 3.58347e-39 | 1.00000 | 3.58347e-39 | 1.00000 |
| rad61     | 2.75231e-39 | 1.00000 | 2.75231e-39 | 1.00000 |
| rad68syn  | 9.68726e-43 | 1.00000 | 9.68726e-43 | 1.00000 |
| rad68anti | 7.81618e-43 | 1.00000 | 7.81618e-43 | 1.00000 |
| rad64     | 1.66450e-44 | 1.00000 | 1.66450e-44 | 1.00000 |
| rad56     | 1.81334e-45 | 1.00000 | 1.81334e-45 | 1.00000 |
| rad40syn  | 2.41144e-47 | 1.00000 | 2.41144e-47 | 1.00000 |
| rad40anti | 1.84070e-47 | 1.00000 | 1.84070e-47 | 1.00000 |
| PAH8+H    | 1.62422e-49 | 1.00000 | 1.62422e-49 | 1.00000 |
| rad73     | 8.21176e-51 | 1.00000 | 8.21176e-51 | 1.00000 |
| rad71     | 3.59712e-55 | 1.00000 | 3.59712e-55 | 1.00000 |

10000000.0 Pa, 90.0000000 K

| Rate constant             | True (fraction)        | Effective (fraction)   |
|---------------------------|------------------------|------------------------|
| Total                     | 7.74016e-16 (1.00 )    | 7.74016e-16 (1.00 )    |
| Formation of rad19        | 7.74016e-16 (1.000 )   | 7.74016e-16 (1.000 )   |
| H-abstraction to cyc2enyl | 2.91736e-25 (3.77e-10) | 2.91736e-25 (3.77e-10) |
| H-abstraction to cyclenyl | 1.47814e-33 (1.91e-18) | 1.47814e-33 (1.91e-18) |

| species                       | PYtrue      | Cumul    | PYeffective | Cumul    |
|-------------------------------|-------------|----------|-------------|----------|
| rad19anti                     | 0.879125    | 0.879125 | 0.879125    | 0.879125 |
| rad9                          | 0.120609    | 0.999734 | 0.120609    | 0.999734 |
| rad8                          | 0.000256748 | 0.999991 | 0.000256748 | 0.999991 |
| rad15                         | 7.15455e-06 | 0.999998 | 7.15455e-06 | 0.999998 |
| rad12                         | 2.49772e-06 | 1.00000  | 2.49772e-06 | 1.00000  |
| Indene+H                      | 7.34127e-09 | 1.00000  | 7.34127e-09 | 1.00000  |
| Benzene+cycloprop-2-enylidene | 3.76912e-10 | 1.00000  | 3.76912e-10 | 1.00000  |
| rad7                          | 9.31183e-11 | 1.00000  | 9.31183e-11 | 1.00000  |
| PhCHCCH2+H                    | 5.22427e-11 | 1.00000  | 5.22427e-11 | 1.00000  |
| rad11                         | 2.56047e-12 | 1.00000  | 2.56047e-12 | 1.00000  |
| rad2                          | 1.86911e-12 | 1.00000  | 1.86911e-12 | 1.00000  |
| rad1                          | 3.04638e-13 | 1.00000  | 3.04638e-13 | 1.00000  |
| rad6                          | 2.31255e-13 | 1.00000  | 2.31255e-13 | 1.00000  |
| rad21                         | 1.30925e-13 | 1.00000  | 1.30925e-13 | 1.00000  |
| rad26                         | 1.09274e-13 | 1.00000  | 1.09274e-13 | 1.00000  |
| rad18                         | 5.45029e-14 | 1.00000  | 5.45029e-14 | 1.00000  |
| rad5                          | 5.01581e-14 | 1.00000  | 5.01581e-14 | 1.00000  |
| PhcycC3H3_A+H                 | 2.54912e-14 | 1.00000  | 2.54912e-14 | 1.00000  |
| rad20                         | 1.34993e-14 | 1.00000  | 1.34993e-14 | 1.00000  |
| rad22                         | 3.15430e-15 | 1.00000  | 3.15430e-15 | 1.00000  |
| Phenyl+cycC3H4                | 1.92810e-15 | 1.00000  | 0.00000     | 1.00000  |
| rad67                         | 5.85389e-16 | 1.00000  | 5.85389e-16 | 1.00000  |
| rad45                         | 5.26869e-16 | 1.00000  | 5.26869e-16 | 1.00000  |
| rad35                         | 2.69422e-16 | 1.00000  | 2.69422e-16 | 1.00000  |
| rad24                         | 2.49638e-16 | 1.00000  | 2.49638e-16 | 1.00000  |
| rad36                         | 6.57356e-17 | 1.00000  | 6.57356e-17 | 1.00000  |
| rad10                         | 5.71414e-17 | 1.00000  | 5.71414e-17 | 1.00000  |
| C2H2+PhCH2                    | 4.46037e-17 | 1.00000  | 4.46037e-17 | 1.00000  |
| rad3                          | 1.40572e-17 | 1.00000  | 1.40572e-17 | 1.00000  |
| rad4                          | 9.66092e-18 | 1.00000  | 9.66092e-18 | 1.00000  |
| PhCCH+CH3                     | 5.94347e-18 | 1.00000  | 5.94347e-18 | 1.00000  |
| PhCCCH3+H                     | 4.27770e-18 | 1.00000  | 4.27770e-18 | 1.00000  |
| Ph+MeAc                       | 2.90031e-18 | 1.00000  | 2.90031e-18 | 1.00000  |
| Benzene+cycloprop-1-enylidene | 1.90970e-18 | 1.00000  | 1.90970e-18 | 1.00000  |
| rad25                         | 1.58852e-18 | 1.00000  | 1.58852e-18 | 1.00000  |
| rad13                         | 1.11842e-18 | 1.00000  | 1.11842e-18 | 1.00000  |
| Ph+Allene                     | 1.00028e-18 | 1.00000  | 1.00028e-18 | 1.00000  |
| PhcycC3H3_B+H                 | 8.45192e-19 | 1.00000  | 8.45192e-19 | 1.00000  |
| rad27                         | 7.01052e-19 | 1.00000  | 7.01052e-19 | 1.00000  |
| rad23                         | 3.72546e-19 | 1.00000  | 3.72546e-19 | 1.00000  |
| PhCH2CCH+H                    | 1.51060e-19 | 1.00000  | 1.51060e-19 | 1.00000  |
| rad30                         | 3.30497e-20 | 1.00000  | 3.30497e-20 | 1.00000  |
| rad19syn                      | 2.38498e-20 | 1.00000  | 2.38498e-20 | 1.00000  |
| rad33                         | 2.20792e-20 | 1.00000  | 2.20792e-20 | 1.00000  |
| rad31                         | 1.95806e-21 | 1.00000  | 1.95806e-21 | 1.00000  |
| rad37                         | 4.60397e-22 | 1.00000  | 4.60397e-22 | 1.00000  |
| rad28                         | 2.02943e-22 | 1.00000  | 2.02943e-22 | 1.00000  |
| rad60syn                      | 8.84812e-23 | 1.00000  | 8.84812e-23 | 1.00000  |
| rad60anti                     | 4.17367e-23 | 1.00000  | 4.17367e-23 | 1.00000  |
| rad14                         | 2.82034e-23 | 1.00000  | 2.82034e-23 | 1.00000  |
| PAH3+H                        | 2.40486e-23 | 1.00000  | 2.40486e-23 | 1.00000  |

|           |             |         |             |         |
|-----------|-------------|---------|-------------|---------|
| PAH7+H    | 7.55532e-24 | 1.00000 | 7.55532e-24 | 1.00000 |
| rad59     | 5.19821e-24 | 1.00000 | 5.19821e-24 | 1.00000 |
| rad38     | 1.01784e-24 | 1.00000 | 1.01784e-24 | 1.00000 |
| PAH10+CH3 | 3.00247e-25 | 1.00000 | 3.00247e-25 | 1.00000 |
| rad46     | 7.54539e-27 | 1.00000 | 7.54539e-27 | 1.00000 |
| rad43     | 1.18063e-27 | 1.00000 | 1.18063e-27 | 1.00000 |
| rad58     | 1.57006e-28 | 1.00000 | 1.57006e-28 | 1.00000 |
| PAH9+H    | 1.07413e-28 | 1.00000 | 1.07413e-28 | 1.00000 |
| rad70     | 7.51924e-29 | 1.00000 | 7.51924e-29 | 1.00000 |
| rad50     | 2.52732e-29 | 1.00000 | 2.52732e-29 | 1.00000 |
| PAH1+H    | 1.19034e-29 | 1.00000 | 1.19034e-29 | 1.00000 |
| rad54     | 6.31560e-30 | 1.00000 | 6.31560e-30 | 1.00000 |
| rad39     | 3.52298e-30 | 1.00000 | 3.52298e-30 | 1.00000 |
| rad34     | 6.80818e-31 | 1.00000 | 6.80818e-31 | 1.00000 |
| rad52     | 9.08275e-32 | 1.00000 | 9.08275e-32 | 1.00000 |
| rad55     | 3.59231e-32 | 1.00000 | 3.59231e-32 | 1.00000 |
| rad62     | 1.87266e-32 | 1.00000 | 1.87266e-32 | 1.00000 |
| rad51     | 1.74758e-32 | 1.00000 | 1.74758e-32 | 1.00000 |
| rad41     | 1.46999e-32 | 1.00000 | 1.46999e-32 | 1.00000 |
| rad47     | 6.51446e-34 | 1.00000 | 6.51446e-34 | 1.00000 |
| rad42     | 1.08988e-36 | 1.00000 | 1.08988e-36 | 1.00000 |
| rad65     | 1.31909e-37 | 1.00000 | 1.31909e-37 | 1.00000 |
| rad61     | 1.90349e-38 | 1.00000 | 1.90349e-38 | 1.00000 |
| rad53     | 1.47350e-38 | 1.00000 | 1.47350e-38 | 1.00000 |
| rad68syn  | 9.07222e-42 | 1.00000 | 9.07222e-42 | 1.00000 |
| rad68anti | 7.29865e-42 | 1.00000 | 7.29865e-42 | 1.00000 |
| rad64     | 8.86616e-44 | 1.00000 | 8.86616e-44 | 1.00000 |
| rad56     | 1.82336e-44 | 1.00000 | 1.82336e-44 | 1.00000 |
| rad40syn  | 3.86335e-46 | 1.00000 | 3.86335e-46 | 1.00000 |
| rad40anti | 2.94661e-46 | 1.00000 | 2.94661e-46 | 1.00000 |
| PAH8+H    | 3.53573e-48 | 1.00000 | 3.53573e-48 | 1.00000 |
| rad73     | 1.36829e-49 | 1.00000 | 1.36829e-49 | 1.00000 |
| rad71     | 1.01450e-53 | 1.00000 | 1.01450e-53 | 1.00000 |

10000000.0 Pa, 100.000000 K

=====

| Rate constant             | True (fraction)        | Effective (fraction)   |
|---------------------------|------------------------|------------------------|
| Total                     | 1.28255e-15 (1.00 )    | 1.28255e-15 (1.00 )    |
| Formation of rad19        | 1.28255e-15 (1.000 )   | 1.28255e-15 (1.000 )   |
| H-abstraction to cyc2enyl | 4.68359e-24 (3.65e-09) | 4.68359e-24 (3.65e-09) |
| H-abstraction to cyclenyl | 1.66242e-31 (1.30e-16) | 1.66242e-31 (1.30e-16) |

| species                       | PYtrue      | Cumul    | PYeffective | Cumul    |
|-------------------------------|-------------|----------|-------------|----------|
| rad19anti                     | 0.865640    | 0.865640 | 0.865640    | 0.865640 |
| rad9                          | 0.134148    | 0.999788 | 0.134148    | 0.999788 |
| rad8                          | 0.000200251 | 0.999988 | 0.000200251 | 0.999988 |
| rad15                         | 9.00117e-06 | 0.999997 | 9.00117e-06 | 0.999997 |
| rad12                         | 2.69589e-06 | 1.000000 | 2.69589e-06 | 1.000000 |
| Indene+H                      | 1.04603e-08 | 1.000000 | 1.04603e-08 | 1.000000 |
| Benzene+cycloprop-2-enylidene | 3.65179e-09 | 1.000000 | 3.65179e-09 | 1.000000 |
| rad7                          | 9.98294e-11 | 1.000000 | 9.98294e-11 | 1.000000 |
| PhCHCCH2+H                    | 6.85337e-11 | 1.000000 | 6.85337e-11 | 1.000000 |
| rad11                         | 3.37548e-12 | 1.000000 | 3.37548e-12 | 1.000000 |
| rad2                          | 2.46367e-12 | 1.000000 | 2.46367e-12 | 1.000000 |
| rad1                          | 3.91881e-13 | 1.000000 | 3.91881e-13 | 1.000000 |
| rad6                          | 2.81312e-13 | 1.000000 | 2.81312e-13 | 1.000000 |
| rad21                         | 1.73128e-13 | 1.000000 | 1.73128e-13 | 1.000000 |
| rad26                         | 1.55009e-13 | 1.000000 | 1.55009e-13 | 1.000000 |
| rad18                         | 7.98954e-14 | 1.000000 | 7.98954e-14 | 1.000000 |
| rad5                          | 5.78064e-14 | 1.000000 | 5.78064e-14 | 1.000000 |
| PhcycC3H3_A+H                 | 3.64898e-14 | 1.000000 | 3.64898e-14 | 1.000000 |
| rad20                         | 1.82107e-14 | 1.000000 | 1.82107e-14 | 1.000000 |
| rad22                         | 4.71359e-15 | 1.000000 | 4.71359e-15 | 1.000000 |
| Phenyl+cycC3H4                | 3.06234e-15 | 1.000000 | 0.000000    | 1.000000 |
| rad67                         | 8.82079e-16 | 1.000000 | 8.82079e-16 | 1.000000 |
| rad45                         | 8.30635e-16 | 1.000000 | 8.30635e-16 | 1.000000 |
| rad35                         | 4.05026e-16 | 1.000000 | 4.05026e-16 | 1.000000 |
| rad24                         | 3.31612e-16 | 1.000000 | 3.31612e-16 | 1.000000 |
| Benzene+cycloprop-1-enylidene | 1.29619e-16 | 1.000000 | 1.29619e-16 | 1.000000 |
| rad36                         | 1.01257e-16 | 1.000000 | 1.01257e-16 | 1.000000 |
| rad10                         | 8.64174e-17 | 1.000000 | 8.64174e-17 | 1.000000 |
| C2H2+PhCH2                    | 6.47276e-17 | 1.000000 | 6.47276e-17 | 1.000000 |
| rad3                          | 2.14129e-17 | 1.000000 | 2.14129e-17 | 1.000000 |
| rad4                          | 1.46106e-17 | 1.000000 | 1.46106e-17 | 1.000000 |
| PhCCH+CH3                     | 7.93121e-18 | 1.000000 | 7.93121e-18 | 1.000000 |
| PhCCCH3+H                     | 6.54334e-18 | 1.000000 | 6.54334e-18 | 1.000000 |
| Ph+MeAc                       | 4.43973e-18 | 1.000000 | 4.43973e-18 | 1.000000 |
| PhcycC3H3_B+H                 | 2.68021e-18 | 1.000000 | 2.68021e-18 | 1.000000 |

|            |             |          |             |          |
|------------|-------------|----------|-------------|----------|
| rad25      | 2.41755e-18 | 1.000000 | 2.41755e-18 | 1.000000 |
| Ph+Allene  | 1.56055e-18 | 1.000000 | 1.56055e-18 | 1.000000 |
| rad13      | 1.54102e-18 | 1.000000 | 1.54102e-18 | 1.000000 |
| rad27      | 1.07157e-18 | 1.000000 | 1.07157e-18 | 1.000000 |
| rad23      | 6.50699e-19 | 1.000000 | 6.50699e-19 | 1.000000 |
| PhCH2CCH+H | 2.39115e-19 | 1.000000 | 2.39115e-19 | 1.000000 |
| rad30      | 5.62310e-20 | 1.000000 | 5.62310e-20 | 1.000000 |
| rad33      | 3.02506e-20 | 1.000000 | 3.02506e-20 | 1.000000 |
| rad19syn   | 7.30432e-21 | 1.000000 | 7.30432e-21 | 1.000000 |
| rad31      | 2.20480e-21 | 1.000000 | 2.20480e-21 | 1.000000 |
| rad37      | 7.87260e-22 | 1.000000 | 7.87260e-22 | 1.000000 |
| rad28      | 3.45679e-22 | 1.000000 | 3.45679e-22 | 1.000000 |
| rad60syn   | 1.53984e-22 | 1.000000 | 1.53984e-22 | 1.000000 |
| rad60anti  | 7.27833e-23 | 1.000000 | 7.27833e-23 | 1.000000 |
| rad14      | 5.02040e-23 | 1.000000 | 5.02040e-23 | 1.000000 |
| PAH3+H     | 4.30438e-23 | 1.000000 | 4.30438e-23 | 1.000000 |
| PAH7+H     | 1.33559e-23 | 1.000000 | 1.33559e-23 | 1.000000 |
| rad59      | 9.26834e-24 | 1.000000 | 9.26834e-24 | 1.000000 |
| rad38      | 1.83292e-24 | 1.000000 | 1.83292e-24 | 1.000000 |
| PAH10+CH3  | 5.57625e-25 | 1.000000 | 5.57625e-25 | 1.000000 |
| rad46      | 1.45580e-26 | 1.000000 | 1.45580e-26 | 1.000000 |
| rad43      | 2.31159e-27 | 1.000000 | 2.31159e-27 | 1.000000 |
| rad58      | 3.13956e-28 | 1.000000 | 3.13956e-28 | 1.000000 |
| PAH9+H     | 2.20999e-28 | 1.000000 | 2.20999e-28 | 1.000000 |
| rad70      | 1.52127e-28 | 1.000000 | 1.52127e-28 | 1.000000 |
| rad50      | 5.12063e-29 | 1.000000 | 5.12063e-29 | 1.000000 |
| PAH1+H     | 2.50586e-29 | 1.000000 | 2.50586e-29 | 1.000000 |
| rad54      | 1.10803e-29 | 1.000000 | 1.10803e-29 | 1.000000 |
| rad39      | 7.25308e-30 | 1.000000 | 7.25308e-30 | 1.000000 |
| rad34      | 1.49198e-30 | 1.000000 | 1.49198e-30 | 1.000000 |
| rad52      | 1.96137e-31 | 1.000000 | 1.96137e-31 | 1.000000 |
| rad55      | 6.62597e-32 | 1.000000 | 6.62597e-32 | 1.000000 |
| rad62      | 4.42651e-32 | 1.000000 | 4.42651e-32 | 1.000000 |
| rad51      | 3.95382e-32 | 1.000000 | 3.95382e-32 | 1.000000 |
| rad41      | 3.65002e-32 | 1.000000 | 3.65002e-32 | 1.000000 |
| rad47      | 1.63774e-33 | 1.000000 | 1.63774e-33 | 1.000000 |
| rad42      | 3.21140e-36 | 1.000000 | 3.21140e-36 | 1.000000 |
| rad65      | 3.18720e-37 | 1.000000 | 3.18720e-37 | 1.000000 |
| rad61      | 1.33796e-37 | 1.000000 | 1.33796e-37 | 1.000000 |
| rad53      | 5.88128e-38 | 1.000000 | 5.88128e-38 | 1.000000 |
| rad68syn   | 8.79148e-41 | 1.000000 | 8.79148e-41 | 1.000000 |
| rad68anti  | 7.04929e-41 | 1.000000 | 7.04929e-41 | 1.000000 |
| rad64      | 4.64073e-43 | 1.000000 | 4.64073e-43 | 1.000000 |
| rad56      | 2.26345e-43 | 1.000000 | 2.26345e-43 | 1.000000 |
| rad40syn   | 6.52861e-45 | 1.000000 | 6.52861e-45 | 1.000000 |
| rad40anti  | 4.97351e-45 | 1.000000 | 4.97351e-45 | 1.000000 |
| PAH8+H     | 8.26390e-47 | 1.000000 | 8.26390e-47 | 1.000000 |
| rad73      | 2.36719e-48 | 1.000000 | 2.36719e-48 | 1.000000 |
| rad71      | 3.04000e-52 | 1.000000 | 3.04000e-52 | 1.000000 |

10000000.0 Pa, 110.000000 K

=====

| Rate constant             | True (fraction)        | Effective (fraction)   |
|---------------------------|------------------------|------------------------|
| Total                     | 1.95524e-15 (1.00 )    | 1.95524e-15 (1.00 )    |
| Formation of rad19        | 1.95524e-15 (1.000 )   | 1.95524e-15 (1.000 )   |
| H-abstraction to cyc2enyl | 4.50936e-23 (2.31e-08) | 4.50936e-23 (2.31e-08) |
| H-abstraction to cyclenyl | 7.87782e-30 (4.03e-15) | 7.87782e-30 (4.03e-15) |

| species                       | PYtrue      | Cumul    | PYeffective | Cumul    |
|-------------------------------|-------------|----------|-------------|----------|
| rad19anti                     | 0.852266    | 0.852266 | 0.852266    | 0.852266 |
| rad9                          | 0.147563    | 0.999829 | 0.147563    | 0.999829 |
| rad8                          | 0.000157164 | 0.999986 | 0.000157164 | 0.999986 |
| rad15                         | 1.10775e-05 | 0.999997 | 1.10775e-05 | 0.999997 |
| rad12                         | 2.86595e-06 | 1.00000  | 2.86595e-06 | 1.00000  |
| Benzene+cycloprop-2-enylidene | 2.30629e-08 | 1.00000  | 2.30629e-08 | 1.00000  |
| Indene+H                      | 1.44273e-08 | 1.00000  | 1.44273e-08 | 1.00000  |
| rad7                          | 1.07189e-10 | 1.00000  | 1.07189e-10 | 1.00000  |
| PhCHCCH2+H                    | 8.81455e-11 | 1.00000  | 8.81455e-11 | 1.00000  |
| rad11                         | 4.36199e-12 | 1.00000  | 4.36199e-12 | 1.00000  |
| rad2                          | 3.18517e-12 | 1.00000  | 3.18517e-12 | 1.00000  |
| rad1                          | 4.96020e-13 | 1.00000  | 4.96020e-13 | 1.00000  |
| rad6                          | 3.39342e-13 | 1.00000  | 3.39342e-13 | 1.00000  |
| rad21                         | 2.24651e-13 | 1.00000  | 2.24651e-13 | 1.00000  |
| rad26                         | 2.13481e-13 | 1.00000  | 2.13481e-13 | 1.00000  |
| rad18                         | 1.13548e-13 | 1.00000  | 1.13548e-13 | 1.00000  |
| rad5                          | 6.60419e-14 | 1.00000  | 6.60419e-14 | 1.00000  |
| PhcycC3H3_A+H                 | 5.22168e-14 | 1.00000  | 5.22168e-14 | 1.00000  |
| rad20                         | 2.43697e-14 | 1.00000  | 2.43697e-14 | 1.00000  |



|                               |             |         |             |         |
|-------------------------------|-------------|---------|-------------|---------|
| rad22                         | 6.84123e-15 | 1.00000 | 6.84123e-15 | 1.00000 |
| Phenyl+cycC3H4                | 4.75932e-15 | 1.00000 | 0.00000     | 1.00000 |
| Benzene+cycloprop-1-enylidene | 4.02908e-15 | 1.00000 | 4.02908e-15 | 1.00000 |
| rad67                         | 1.29075e-15 | 1.00000 | 1.29075e-15 | 1.00000 |
| rad45                         | 1.26152e-15 | 1.00000 | 1.26152e-15 | 1.00000 |
| rad35                         | 5.91206e-16 | 1.00000 | 5.91206e-16 | 1.00000 |
| rad24                         | 4.29467e-16 | 1.00000 | 4.29467e-16 | 1.00000 |
| rad36                         | 1.50689e-16 | 1.00000 | 1.50689e-16 | 1.00000 |
| rad10                         | 1.26978e-16 | 1.00000 | 1.26978e-16 | 1.00000 |
| C2H2+PhCH2                    | 9.29107e-17 | 1.00000 | 9.29107e-17 | 1.00000 |
| rad3                          | 3.16844e-17 | 1.00000 | 3.16844e-17 | 1.00000 |
| rad4                          | 2.14835e-17 | 1.00000 | 2.14835e-17 | 1.00000 |
| PhCCH+CH3                     | 1.03948e-17 | 1.00000 | 1.03948e-17 | 1.00000 |
| PhCCCH3+H                     | 9.76042e-18 | 1.00000 | 9.76042e-18 | 1.00000 |
| PhcycC3H3_B+H                 | 7.88422e-18 | 1.00000 | 7.88422e-18 | 1.00000 |
| Ph+MeAc                       | 6.64247e-18 | 1.00000 | 6.64247e-18 | 1.00000 |
| rad25                         | 3.57593e-18 | 1.00000 | 3.57593e-18 | 1.00000 |
| Ph+Allene                     | 2.37087e-18 | 1.00000 | 2.37087e-18 | 1.00000 |
| rad13                         | 2.08582e-18 | 1.00000 | 2.08582e-18 | 1.00000 |
| rad27                         | 1.59238e-18 | 1.00000 | 1.59238e-18 | 1.00000 |
| rad23                         | 1.09024e-18 | 1.00000 | 1.09024e-18 | 1.00000 |
| PhCH2CCH+H                    | 3.69040e-19 | 1.00000 | 3.69040e-19 | 1.00000 |
| rad30                         | 9.20163e-20 | 1.00000 | 9.20163e-20 | 1.00000 |
| rad33                         | 4.07212e-20 | 1.00000 | 4.07212e-20 | 1.00000 |
| rad19syn                      | 2.91880e-21 | 1.00000 | 2.91880e-21 | 1.00000 |
| rad31                         | 2.49885e-21 | 1.00000 | 2.49885e-21 | 1.00000 |
| rad37                         | 1.29880e-21 | 1.00000 | 1.29880e-21 | 1.00000 |
| rad28                         | 5.68930e-22 | 1.00000 | 5.68930e-22 | 1.00000 |
| rad60syn                      | 2.58219e-22 | 1.00000 | 2.58219e-22 | 1.00000 |
| rad60anti                     | 1.22323e-22 | 1.00000 | 1.22323e-22 | 1.00000 |
| rad14                         | 8.61608e-23 | 1.00000 | 8.61608e-23 | 1.00000 |
| PAH3+H                        | 7.44207e-23 | 1.00000 | 7.44207e-23 | 1.00000 |
| PAH7+H                        | 2.28510e-23 | 1.00000 | 2.28510e-23 | 1.00000 |
| rad59                         | 1.59569e-23 | 1.00000 | 1.59569e-23 | 1.00000 |
| rad38                         | 3.19106e-24 | 1.00000 | 3.19106e-24 | 1.00000 |
| PAH10+CH3                     | 1.00593e-24 | 1.00000 | 1.00593e-24 | 1.00000 |
| rad46                         | 2.69174e-26 | 1.00000 | 2.69174e-26 | 1.00000 |
| rad43                         | 4.40484e-27 | 1.00000 | 4.40484e-27 | 1.00000 |
| rad58                         | 6.12037e-28 | 1.00000 | 6.12037e-28 | 1.00000 |
| PAH9+H                        | 4.35030e-28 | 1.00000 | 4.35030e-28 | 1.00000 |
| rad70                         | 3.00662e-28 | 1.00000 | 3.00662e-28 | 1.00000 |
| rad50                         | 9.98798e-29 | 1.00000 | 9.98798e-29 | 1.00000 |
| PAH1+H                        | 5.16617e-29 | 1.00000 | 5.16617e-29 | 1.00000 |
| rad54                         | 1.91351e-29 | 1.00000 | 1.91351e-29 | 1.00000 |
| rad39                         | 1.43854e-29 | 1.00000 | 1.43854e-29 | 1.00000 |
| rad34                         | 3.21119e-30 | 1.00000 | 3.21119e-30 | 1.00000 |
| rad52                         | 4.07462e-31 | 1.00000 | 4.07462e-31 | 1.00000 |
| rad55                         | 1.20860e-31 | 1.00000 | 1.20860e-31 | 1.00000 |
| rad62                         | 1.01473e-31 | 1.00000 | 1.01473e-31 | 1.00000 |
| rad41                         | 8.92560e-32 | 1.00000 | 8.92560e-32 | 1.00000 |
| rad51                         | 8.63890e-32 | 1.00000 | 8.63890e-32 | 1.00000 |
| rad47                         | 4.02657e-33 | 1.00000 | 4.02657e-33 | 1.00000 |
| rad42                         | 9.28875e-36 | 1.00000 | 9.28875e-36 | 1.00000 |
| rad61                         | 9.30826e-37 | 1.00000 | 9.30826e-37 | 1.00000 |
| rad65                         | 7.50997e-37 | 1.00000 | 7.50997e-37 | 1.00000 |
| rad53                         | 2.25159e-37 | 1.00000 | 2.25159e-37 | 1.00000 |
| rad68syn                      | 8.54864e-40 | 1.00000 | 8.54864e-40 | 1.00000 |
| rad68anti                     | 6.82793e-40 | 1.00000 | 6.82793e-40 | 1.00000 |
| rad56                         | 2.91635e-42 | 1.00000 | 2.91635e-42 | 1.00000 |
| rad64                         | 2.38719e-42 | 1.00000 | 2.38719e-42 | 1.00000 |
| rad40syn                      | 1.12777e-43 | 1.00000 | 1.12777e-43 | 1.00000 |
| rad40anti                     | 8.57714e-44 | 1.00000 | 8.57714e-44 | 1.00000 |
| PAH8+H                        | 2.00062e-45 | 1.00000 | 2.00062e-45 | 1.00000 |
| rad73                         | 4.15464e-47 | 1.00000 | 4.15464e-47 | 1.00000 |
| rad71                         | 9.37981e-51 | 1.00000 | 9.37981e-51 | 1.00000 |

10000000.0 Pa, 120.000000 K

| Rate constant             | True (fraction)        | Effective (fraction)   |             |          |
|---------------------------|------------------------|------------------------|-------------|----------|
| Total                     | 2.79817e-15 (1.00 )    | 2.79817e-15 (1.00 )    |             |          |
| Formation of rad19        | 2.79817e-15 (1.000 )   | 2.79817e-15 (1.000 )   |             |          |
| H-abstraction to cyc2enyl | 2.96039e-22 (1.06e-07) | 2.96039e-22 (1.06e-07) |             |          |
| H-abstraction to cyclenyl | 1.95323e-28 (6.98e-14) | 1.95323e-28 (6.98e-14) |             |          |
| species                   | PYtrue                 | Cumul                  | PYeffective | Cumul    |
| rad19anti                 | 0.838947               | 0.838947               | 0.838947    | 0.838947 |
| rad9                      | 0.160913               | 0.999860               | 0.160913    | 0.999860 |
| rad8                      | 0.000124033            | 0.999984               | 0.000124033 | 0.999984 |

|                               |             |          |             |          |
|-------------------------------|-------------|----------|-------------|----------|
| rad15                         | 1.34006e-05 | 0.999997 | 1.34006e-05 | 0.999997 |
| rad12                         | 3.01285e-06 | 1.00000  | 3.01285e-06 | 1.00000  |
| Benzene+cycloprop-2-enylidene | 1.05797e-07 | 1.00000  | 1.05797e-07 | 1.00000  |
| Indene+H                      | 1.94037e-08 | 1.00000  | 1.94037e-08 | 1.00000  |
| rad7                          | 1.15331e-10 | 1.00000  | 1.15331e-10 | 1.00000  |
| PhCHCCH2+H                    | 1.11724e-10 | 1.00000  | 1.11724e-10 | 1.00000  |
| rad11                         | 5.55457e-12 | 1.00000  | 5.55457e-12 | 1.00000  |
| rad2                          | 4.05979e-12 | 1.00000  | 4.05979e-12 | 1.00000  |
| rad1                          | 6.20543e-13 | 1.00000  | 6.20543e-13 | 1.00000  |
| rad6                          | 4.07163e-13 | 1.00000  | 4.07163e-13 | 1.00000  |
| rad26                         | 2.87567e-13 | 1.00000  | 2.87567e-13 | 1.00000  |
| rad21                         | 2.87552e-13 | 1.00000  | 2.87552e-13 | 1.00000  |
| rad18                         | 1.57653e-13 | 1.00000  | 1.57653e-13 | 1.00000  |
| rad5                          | 7.50010e-14 | 1.00000  | 7.50010e-14 | 1.00000  |
| PhcycC3H3_A+H                 | 7.48953e-14 | 1.00000  | 7.48953e-14 | 1.00000  |
| Benzene+cycloprop-1-enylidene | 6.98038e-14 | 1.00000  | 6.98038e-14 | 1.00000  |
| rad20                         | 3.24211e-14 | 1.00000  | 3.24211e-14 | 1.00000  |
| rad22                         | 9.71851e-15 | 1.00000  | 9.71851e-15 | 1.00000  |
| Phenyl+cycC3H4                | 7.28066e-15 | 1.00000  | 0.00000     | 1.00000  |
| rad45                         | 1.86382e-15 | 1.00000  | 1.86382e-15 | 1.00000  |
| rad67                         | 1.84868e-15 | 1.00000  | 1.84868e-15 | 1.00000  |
| rad35                         | 8.44517e-16 | 1.00000  | 8.44517e-16 | 1.00000  |
| rad24                         | 5.46086e-16 | 1.00000  | 5.46086e-16 | 1.00000  |
| rad36                         | 2.18657e-16 | 1.00000  | 2.18657e-16 | 1.00000  |
| rad10                         | 1.82706e-16 | 1.00000  | 1.82706e-16 | 1.00000  |
| C2H2+PhCH2                    | 1.32598e-16 | 1.00000  | 1.32598e-16 | 1.00000  |
| rad3                          | 4.59083e-17 | 1.00000  | 4.59083e-17 | 1.00000  |
| rad4                          | 3.09557e-17 | 1.00000  | 3.09557e-17 | 1.00000  |
| PhcycC3H3_B+H                 | 2.15254e-17 | 1.00000  | 2.15254e-17 | 1.00000  |
| PhCCCH3+H                     | 1.43072e-17 | 1.00000  | 1.43072e-17 | 1.00000  |
| PhCCH+CH3                     | 1.34539e-17 | 1.00000  | 1.34539e-17 | 1.00000  |
| Ph+MeAc                       | 9.78665e-18 | 1.00000  | 9.78665e-18 | 1.00000  |
| rad25                         | 5.18219e-18 | 1.00000  | 5.18219e-18 | 1.00000  |
| Ph+Allene                     | 3.53677e-18 | 1.00000  | 3.53677e-18 | 1.00000  |
| rad13                         | 2.78909e-18 | 1.00000  | 2.78909e-18 | 1.00000  |
| rad27                         | 2.31905e-18 | 1.00000  | 2.31905e-18 | 1.00000  |
| rad23                         | 1.77155e-18 | 1.00000  | 1.77155e-18 | 1.00000  |
| PhCH2CCH+H                    | 5.60039e-19 | 1.00000  | 5.60039e-19 | 1.00000  |
| rad30                         | 1.46341e-19 | 1.00000  | 1.46341e-19 | 1.00000  |
| rad33                         | 5.41595e-20 | 1.00000  | 5.41595e-20 | 1.00000  |
| rad31                         | 2.85055e-21 | 1.00000  | 2.85055e-21 | 1.00000  |
| rad37                         | 2.08932e-21 | 1.00000  | 2.08932e-21 | 1.00000  |
| rad19syn                      | 1.45421e-21 | 1.00000  | 1.45421e-21 | 1.00000  |
| rad28                         | 9.14163e-22 | 1.00000  | 9.14163e-22 | 1.00000  |
| rad60syn                      | 4.21739e-22 | 1.00000  | 4.21739e-22 | 1.00000  |
| rad60anti                     | 2.00269e-22 | 1.00000  | 2.00269e-22 | 1.00000  |
| rad14                         | 1.44160e-22 | 1.00000  | 1.44160e-22 | 1.00000  |
| PAH3+H                        | 1.25675e-22 | 1.00000  | 1.25675e-22 | 1.00000  |
| PAH7+H                        | 3.82567e-23 | 1.00000  | 3.82567e-23 | 1.00000  |
| rad59                         | 2.68208e-23 | 1.00000  | 2.68208e-23 | 1.00000  |
| rad38                         | 5.43105e-24 | 1.00000  | 5.43105e-24 | 1.00000  |
| PAH10+CH3                     | 1.78296e-24 | 1.00000  | 1.78296e-24 | 1.00000  |
| rad46                         | 4.83210e-26 | 1.00000  | 4.83210e-26 | 1.00000  |
| rad43                         | 8.26819e-27 | 1.00000  | 8.26819e-27 | 1.00000  |
| rad58                         | 1.17721e-27 | 1.00000  | 1.17721e-27 | 1.00000  |
| PAH9+H                        | 8.30819e-28 | 1.00000  | 8.30819e-28 | 1.00000  |
| rad70                         | 5.87690e-28 | 1.00000  | 5.87690e-28 | 1.00000  |
| rad50                         | 1.90138e-28 | 1.00000  | 1.90138e-28 | 1.00000  |
| PAH1+H                        | 1.05543e-28 | 1.00000  | 1.05543e-28 | 1.00000  |
| rad54                         | 3.28486e-29 | 1.00000  | 3.28486e-29 | 1.00000  |
| rad39                         | 2.78792e-29 | 1.00000  | 2.78792e-29 | 1.00000  |
| rad34                         | 6.87277e-30 | 1.00000  | 6.87277e-30 | 1.00000  |
| rad52                         | 8.26829e-31 | 1.00000  | 8.26829e-31 | 1.00000  |
| rad62                         | 2.29227e-31 | 1.00000  | 2.29227e-31 | 1.00000  |
| rad55                         | 2.20246e-31 | 1.00000  | 2.20246e-31 | 1.00000  |
| rad41                         | 2.17490e-31 | 1.00000  | 2.17490e-31 | 1.00000  |
| rad51                         | 1.85179e-31 | 1.00000  | 1.85179e-31 | 1.00000  |
| rad47                         | 9.81805e-33 | 1.00000  | 9.81805e-33 | 1.00000  |
| rad42                         | 2.67843e-35 | 1.00000  | 2.67843e-35 | 1.00000  |
| rad61                         | 6.21340e-36 | 1.00000  | 6.21340e-36 | 1.00000  |
| rad65                         | 1.75379e-36 | 1.00000  | 1.75379e-36 | 1.00000  |
| rad53                         | 8.26383e-37 | 1.00000  | 8.26383e-37 | 1.00000  |
| rad68syn                      | 8.00470e-39 | 1.00000  | 8.00470e-39 | 1.00000  |
| rad68anti                     | 6.36389e-39 | 1.00000  | 6.36389e-39 | 1.00000  |
| rad56                         | 3.36969e-41 | 1.00000  | 3.36969e-41 | 1.00000  |
| rad64                         | 1.20503e-41 | 1.00000  | 1.20503e-41 | 1.00000  |
| rad40syn                      | 1.90463e-42 | 1.00000  | 1.90463e-42 | 1.00000  |
| rad40anti                     | 1.44524e-42 | 1.00000  | 1.44524e-42 | 1.00000  |
| PAH8+H                        | 4.78859e-44 | 1.00000  | 4.78859e-44 | 1.00000  |
| rad73                         | 7.12709e-46 | 1.00000  | 7.12709e-46 | 1.00000  |

rad71 | 2.85333e-49 1.00000 | 2.85333e-49 1.00000

10000000.0 Pa, 130.000000 K

| Rate constant             | True (fraction)        | Effective (fraction)   |
|---------------------------|------------------------|------------------------|
| Total                     | 3.81236e-15 (1.00 )    | 3.81236e-15 (1.00 )    |
| Formation of rad19        | 3.81236e-15 (1.000 )   | 3.81236e-15 (1.000 )   |
| H-abstraction to cyc2enyl | 1.44825e-21 (3.80e-07) | 1.44825e-21 (3.80e-07) |
| H-abstraction to cyclenyl | 2.94348e-27 (7.72e-13) | 2.94348e-27 (7.72e-13) |

| species                       | PYtrue      | Cumul    | PYeffective | Cumul    |
|-------------------------------|-------------|----------|-------------|----------|
| rad19anti                     | 0.825634    | 0.825634 | 0.825634    | 0.825634 |
| rad9                          | 0.174249    | 0.999883 | 0.174249    | 0.999883 |
| rad8                          | 9.83686e-05 | 0.999981 | 9.83686e-05 | 0.999981 |
| rad15                         | 1.59922e-05 | 0.999997 | 1.59922e-05 | 0.999997 |
| rad12                         | 3.14093e-06 | 1.00000  | 3.14093e-06 | 1.00000  |
| Benzene+cycloprop-2-enylidene | 3.79882e-07 | 1.00000  | 3.79882e-07 | 1.00000  |
| Indene+H                      | 2.55876e-08 | 1.00000  | 2.55876e-08 | 1.00000  |
| PhCHCCH2+H                    | 1.40102e-10 | 1.00000  | 1.40102e-10 | 1.00000  |
| rad7                          | 1.24412e-10 | 1.00000  | 1.24412e-10 | 1.00000  |
| rad11                         | 6.99800e-12 | 1.00000  | 6.99800e-12 | 1.00000  |
| rad2                          | 5.12145e-12 | 1.00000  | 5.12145e-12 | 1.00000  |
| Benzene+cycloprop-1-enylidene | 7.72089e-13 | 1.00000  | 7.72089e-13 | 1.00000  |
| rad1                          | 7.69982e-13 | 1.00000  | 7.69982e-13 | 1.00000  |
| rad6                          | 4.87104e-13 | 1.00000  | 4.87104e-13 | 1.00000  |
| rad26                         | 3.80986e-13 | 1.00000  | 3.80986e-13 | 1.00000  |
| rad21                         | 3.64528e-13 | 1.00000  | 3.64528e-13 | 1.00000  |
| rad18                         | 2.15070e-13 | 1.00000  | 2.15070e-13 | 1.00000  |
| PhcycC3H3_A+H                 | 1.07905e-13 | 1.00000  | 1.07905e-13 | 1.00000  |
| rad5                          | 8.48459e-14 | 1.00000  | 8.48459e-14 | 1.00000  |
| rad20                         | 4.29656e-14 | 1.00000  | 4.29656e-14 | 1.00000  |
| rad22                         | 1.35929e-14 | 1.00000  | 1.35929e-14 | 1.00000  |
| Phenyl+cycC3H4                | 1.10147e-14 | 1.00000  | 0.00000     | 1.00000  |
| rad45                         | 2.69864e-15 | 1.00000  | 2.69864e-15 | 1.00000  |
| rad67                         | 2.60729e-15 | 1.00000  | 2.60729e-15 | 1.00000  |
| rad35                         | 1.18769e-15 | 1.00000  | 1.18769e-15 | 1.00000  |
| rad24                         | 6.85345e-16 | 1.00000  | 6.85345e-16 | 1.00000  |
| rad36                         | 3.11533e-16 | 1.00000  | 3.11533e-16 | 1.00000  |
| rad10                         | 2.59008e-16 | 1.00000  | 2.59008e-16 | 1.00000  |
| C2H2+PhCH2                    | 1.88924e-16 | 1.00000  | 1.88924e-16 | 1.00000  |
| rad3                          | 6.55396e-17 | 1.00000  | 6.55396e-17 | 1.00000  |
| PhcycC3H3_B+H                 | 5.49953e-17 | 1.00000  | 5.49953e-17 | 1.00000  |
| rad4                          | 4.39751e-17 | 1.00000  | 4.39751e-17 | 1.00000  |
| PhCCCH3+H                     | 2.07340e-17 | 1.00000  | 2.07340e-17 | 1.00000  |
| PhCCH+CH3                     | 1.72695e-17 | 1.00000  | 1.72695e-17 | 1.00000  |
| Ph+MeAc                       | 1.42844e-17 | 1.00000  | 1.42844e-17 | 1.00000  |
| rad25                         | 7.40336e-18 | 1.00000  | 7.40336e-18 | 1.00000  |
| Ph+Allene                     | 5.21435e-18 | 1.00000  | 5.21435e-18 | 1.00000  |
| rad13                         | 3.70054e-18 | 1.00000  | 3.70054e-18 | 1.00000  |
| rad27                         | 3.33048e-18 | 1.00000  | 3.33048e-18 | 1.00000  |
| rad23                         | 2.81529e-18 | 1.00000  | 2.81529e-18 | 1.00000  |
| PhCH2CCH+H                    | 8.41289e-19 | 1.00000  | 8.41289e-19 | 1.00000  |
| rad30                         | 2.28019e-19 | 1.00000  | 2.28019e-19 | 1.00000  |
| rad33                         | 7.14789e-20 | 1.00000  | 7.14789e-20 | 1.00000  |
| rad37                         | 3.30434e-21 | 1.00000  | 3.30434e-21 | 1.00000  |
| rad31                         | 3.27389e-21 | 1.00000  | 3.27389e-21 | 1.00000  |
| rad28                         | 1.44570e-21 | 1.00000  | 1.44570e-21 | 1.00000  |
| rad19syn                      | 8.74106e-22 | 1.00000  | 8.74106e-22 | 1.00000  |
| rad60syn                      | 6.76495e-22 | 1.00000  | 6.76495e-22 | 1.00000  |
| rad60anti                     | 3.22094e-22 | 1.00000  | 3.22094e-22 | 1.00000  |
| rad14                         | 2.37209e-22 | 1.00000  | 2.37209e-22 | 1.00000  |
| PAH3+H                        | 2.09106e-22 | 1.00000  | 2.09106e-22 | 1.00000  |
| PAH7+H                        | 6.32192e-23 | 1.00000  | 6.32192e-23 | 1.00000  |
| rad59                         | 4.43957e-23 | 1.00000  | 4.43957e-23 | 1.00000  |
| rad38                         | 9.11603e-24 | 1.00000  | 9.11603e-24 | 1.00000  |
| PAH10+CH3                     | 3.13355e-24 | 1.00000  | 3.13355e-24 | 1.00000  |
| rad46                         | 8.50852e-26 | 1.00000  | 8.50852e-26 | 1.00000  |
| rad43                         | 1.54383e-26 | 1.00000  | 1.54383e-26 | 1.00000  |
| rad58                         | 2.25564e-27 | 1.00000  | 2.25564e-27 | 1.00000  |
| PAH9+H                        | 1.55660e-27 | 1.00000  | 1.55660e-27 | 1.00000  |
| rad70                         | 1.14747e-27 | 1.00000  | 1.14747e-27 | 1.00000  |
| rad50                         | 3.57147e-28 | 1.00000  | 3.57147e-28 | 1.00000  |
| PAH1+H                        | 2.15643e-28 | 1.00000  | 2.15643e-28 | 1.00000  |
| rad54                         | 5.65039e-29 | 1.00000  | 5.65039e-29 | 1.00000  |
| rad39                         | 5.34036e-29 | 1.00000  | 5.34036e-29 | 1.00000  |
| rad34                         | 1.47710e-29 | 1.00000  | 1.47710e-29 | 1.00000  |
| rad52                         | 1.65887e-30 | 1.00000  | 1.65887e-30 | 1.00000  |
| rad41                         | 5.32826e-31 | 1.00000  | 5.32826e-31 | 1.00000  |

|           |             |         |             |         |
|-----------|-------------|---------|-------------|---------|
| rad62     | 5.16938e-31 | 1.00000 | 5.16938e-31 | 1.00000 |
| rad55     | 4.04274e-31 | 1.00000 | 4.04274e-31 | 1.00000 |
| rad51     | 3.94330e-31 | 1.00000 | 3.94330e-31 | 1.00000 |
| rad47     | 2.39892e-32 | 1.00000 | 2.39892e-32 | 1.00000 |
| rad42     | 7.78977e-35 | 1.00000 | 7.78977e-35 | 1.00000 |
| rad61     | 3.88946e-35 | 1.00000 | 3.88946e-35 | 1.00000 |
| rad65     | 4.11307e-36 | 1.00000 | 4.11307e-36 | 1.00000 |
| rad53     | 2.92252e-36 | 1.00000 | 2.92252e-36 | 1.00000 |
| rad68syn  | 6.96659e-38 | 1.00000 | 6.96659e-38 | 1.00000 |
| rad68anti | 5.50787e-38 | 1.00000 | 5.50787e-38 | 1.00000 |
| rad56     | 3.29746e-40 | 1.00000 | 3.29746e-40 | 1.00000 |
| rad64     | 5.96922e-41 | 1.00000 | 5.96922e-41 | 1.00000 |
| rad40syn  | 2.99714e-41 | 1.00000 | 2.99714e-41 | 1.00000 |
| rad40anti | 2.26731e-41 | 1.00000 | 2.26731e-41 | 1.00000 |
| PAH8+H    | 1.07375e-42 | 1.00000 | 1.07375e-42 | 1.00000 |
| rad73     | 1.14852e-44 | 1.00000 | 1.14852e-44 | 1.00000 |
| rad71     | 8.12605e-48 | 1.00000 | 8.12605e-48 | 1.00000 |

10000000.0 Pa, 140.000000 K

```
=====
```

| Rate constant             | True (fraction)        | Effective (fraction)   |
|---------------------------|------------------------|------------------------|
| Total                     | 4.99515e-15 (1.00 )    | 4.99515e-15 (1.00 )    |
| Formation of rad19        | 4.99514e-15 (1.000 )   | 4.99514e-15 (1.000 )   |
| H-abstraction to cyc2enyl | 5.62488e-21 (1.13e-06) | 5.62488e-21 (1.13e-06) |
| H-abstraction to cyclenyl | 3.00047e-26 (6.01e-12) | 3.00047e-26 (6.01e-12) |

  

| species                       | PYtrue      | Cumul    | PYeffective | Cumul    |
|-------------------------------|-------------|----------|-------------|----------|
| rad19anti                     | 0.812275    | 0.812275 | 0.812275    | 0.812275 |
| rad9                          | 0.187623    | 0.999898 | 0.187623    | 0.999898 |
| rad8                          | 7.83561e-05 | 0.999976 | 7.83561e-05 | 0.999976 |
| rad15                         | 1.88798e-05 | 0.999995 | 1.88798e-05 | 0.999995 |
| rad12                         | 3.25391e-06 | 0.999998 | 3.25391e-06 | 0.999998 |
| Benzene+cycloprop-2-enylidene | 1.12607e-06 | 0.999999 | 1.12607e-06 | 0.999999 |
| Indene+H                      | 3.32245e-08 | 1.000000 | 3.32245e-08 | 1.000000 |
| PhCHCCH2+H                    | 1.74359e-10 | 1.000000 | 1.74359e-10 | 1.000000 |
| rad7                          | 1.34612e-10 | 1.000000 | 1.34612e-10 | 1.000000 |
| rad11                         | 8.75054e-12 | 1.000000 | 8.75054e-12 | 1.000000 |
| rad2                          | 6.41441e-12 | 1.000000 | 6.41441e-12 | 1.000000 |
| Benzene+cycloprop-1-enylidene | 6.00677e-12 | 1.000000 | 6.00677e-12 | 1.000000 |
| rad1                          | 9.50253e-13 | 1.000000 | 9.50253e-13 | 1.000000 |
| rad6                          | 5.82161e-13 | 1.000000 | 5.82161e-13 | 1.000000 |
| rad26                         | 4.98601e-13 | 1.000000 | 4.98601e-13 | 1.000000 |
| rad21                         | 4.59131e-13 | 1.000000 | 4.59131e-13 | 1.000000 |
| rad18                         | 2.89588e-13 | 1.000000 | 2.89588e-13 | 1.000000 |
| PhcycC3H3_A+H                 | 1.56428e-13 | 1.000000 | 1.56428e-13 | 1.000000 |
| rad5                          | 9.57721e-14 | 1.000000 | 9.57721e-14 | 1.000000 |
| rad20                         | 5.68252e-14 | 1.000000 | 5.68252e-14 | 1.000000 |
| rad22                         | 1.88067e-14 | 1.000000 | 1.88067e-14 | 1.000000 |
| Phenyl+cycC3H4                | 1.65390e-14 | 1.000000 | 0.000000    | 1.000000 |
| rad45                         | 3.85157e-15 | 1.000000 | 3.85157e-15 | 1.000000 |
| rad67                         | 3.63846e-15 | 1.000000 | 3.63846e-15 | 1.000000 |
| rad35                         | 1.65235e-15 | 1.000000 | 1.65235e-15 | 1.000000 |
| rad24                         | 8.52419e-16 | 1.000000 | 8.52419e-16 | 1.000000 |
| rad36                         | 4.38217e-16 | 1.000000 | 4.38217e-16 | 1.000000 |
| rad10                         | 3.63523e-16 | 1.000000 | 3.63523e-16 | 1.000000 |
| C2H2+PhCH2                    | 2.69661e-16 | 1.000000 | 2.69661e-16 | 1.000000 |
| PhcycC3H3_B+H                 | 1.32855e-16 | 1.000000 | 1.32855e-16 | 1.000000 |
| rad3                          | 9.26511e-17 | 1.000000 | 9.26511e-17 | 1.000000 |
| rad4                          | 6.18914e-17 | 1.000000 | 6.18914e-17 | 1.000000 |
| PhCCCH3+H                     | 2.98547e-17 | 1.000000 | 2.98547e-17 | 1.000000 |
| PhCCH+CH3                     | 2.20596e-17 | 1.000000 | 2.20596e-17 | 1.000000 |
| Ph+MeAc                       | 2.07571e-17 | 1.000000 | 2.07571e-17 | 1.000000 |
| rad25                         | 1.04785e-17 | 1.000000 | 1.04785e-17 | 1.000000 |
| Ph+Allene                     | 7.63835e-18 | 1.000000 | 7.63835e-18 | 1.000000 |
| rad13                         | 4.88895e-18 | 1.000000 | 4.88895e-18 | 1.000000 |
| rad27                         | 4.74041e-18 | 1.000000 | 4.74041e-18 | 1.000000 |
| rad23                         | 4.40510e-18 | 1.000000 | 4.40510e-18 | 1.000000 |
| PhCH2CCH+H                    | 1.25792e-18 | 1.000000 | 1.25792e-18 | 1.000000 |
| rad30                         | 3.50331e-19 | 1.000000 | 3.50331e-19 | 1.000000 |
| rad33                         | 9.39371e-20 | 1.000000 | 9.39371e-20 | 1.000000 |
| rad37                         | 5.17215e-21 | 1.000000 | 5.17215e-21 | 1.000000 |
| rad31                         | 3.78779e-21 | 1.000000 | 3.78779e-21 | 1.000000 |
| rad28                         | 2.26502e-21 | 1.000000 | 2.26502e-21 | 1.000000 |
| rad60syn                      | 1.07299e-21 | 1.000000 | 1.07299e-21 | 1.000000 |
| rad19syn                      | 6.18746e-22 | 1.000000 | 6.18746e-22 | 1.000000 |
| rad60anti                     | 5.12358e-22 | 1.000000 | 5.12358e-22 | 1.000000 |
| rad14                         | 3.86611e-22 | 1.000000 | 3.86611e-22 | 1.000000 |
| PAH3+H                        | 3.45285e-22 | 1.000000 | 3.45285e-22 | 1.000000 |

|           |             |          |             |          |
|-----------|-------------|----------|-------------|----------|
| PAH7+H    | 1.03858e-22 | 1.000000 | 1.03858e-22 | 1.000000 |
| rad59     | 7.28871e-23 | 1.000000 | 7.28871e-23 | 1.000000 |
| rad38     | 1.51995e-23 | 1.000000 | 1.51995e-23 | 1.000000 |
| PAH10+CH3 | 5.50200e-24 | 1.000000 | 5.50200e-24 | 1.000000 |
| rad46     | 1.48189e-25 | 1.000000 | 1.48189e-25 | 1.000000 |
| rad43     | 2.89095e-26 | 1.000000 | 2.89095e-26 | 1.000000 |
| rad58     | 4.33943e-27 | 1.000000 | 4.33943e-27 | 1.000000 |
| PAH9+H    | 2.88765e-27 | 1.000000 | 2.88765e-27 | 1.000000 |
| rad70     | 2.25635e-27 | 1.000000 | 2.25635e-27 | 1.000000 |
| rad50     | 6.67951e-28 | 1.000000 | 6.67951e-28 | 1.000000 |
| PAH1+H    | 4.43826e-28 | 1.000000 | 4.43826e-28 | 1.000000 |
| rad39     | 1.02085e-28 | 1.000000 | 1.02085e-28 | 1.000000 |
| rad54     | 9.80244e-29 | 1.000000 | 9.80244e-29 | 1.000000 |
| rad34     | 3.21241e-29 | 1.000000 | 3.21241e-29 | 1.000000 |
| rad52     | 3.32362e-30 | 1.000000 | 3.32362e-30 | 1.000000 |
| rad41     | 1.32115e-30 | 1.000000 | 1.32115e-30 | 1.000000 |
| rad62     | 1.17631e-30 | 1.000000 | 1.17631e-30 | 1.000000 |
| rad51     | 8.42750e-31 | 1.000000 | 8.42750e-31 | 1.000000 |
| rad55     | 7.52220e-31 | 1.000000 | 7.52220e-31 | 1.000000 |
| rad47     | 5.91673e-32 | 1.000000 | 5.91673e-32 | 1.000000 |
| rad42     | 2.30452e-34 | 1.000000 | 2.30452e-34 | 1.000000 |
| rad61     | 2.26060e-34 | 1.000000 | 2.26060e-34 | 1.000000 |
| rad53     | 1.00225e-35 | 1.000000 | 1.00225e-35 | 1.000000 |
| rad65     | 9.79316e-36 | 1.000000 | 9.79316e-36 | 1.000000 |
| rad68syn  | 5.52873e-37 | 1.000000 | 5.52873e-37 | 1.000000 |
| rad68anti | 4.34233e-37 | 1.000000 | 4.34233e-37 | 1.000000 |
| rad56     | 2.72634e-39 | 1.000000 | 2.72634e-39 | 1.000000 |
| rad40syn  | 4.23984e-40 | 1.000000 | 4.23984e-40 | 1.000000 |
| rad40anti | 3.19516e-40 | 1.000000 | 3.19516e-40 | 1.000000 |
| rad64     | 2.90769e-40 | 1.000000 | 2.90769e-40 | 1.000000 |
| PAH8+H    | 2.15736e-41 | 1.000000 | 2.15736e-41 | 1.000000 |
| rad73     | 1.68961e-43 | 1.000000 | 1.68961e-43 | 1.000000 |
| rad71     | 2.07280e-46 | 1.000000 | 2.07280e-46 | 1.000000 |

10000000.0 Pa, 150.000000 K

=====

| Rate constant             | True (fraction)        | Effective (fraction)   |
|---------------------------|------------------------|------------------------|
| Total                     | 6.34137e-15 (1.00 )    | 6.34137e-15 (1.00 )    |
| Formation of rad19        | 6.34135e-15 (1.000 )   | 6.34135e-15 (1.000 )   |
| H-abstraction to cyc2enyl | 1.81685e-20 (2.87e-06) | 1.81685e-20 (2.87e-06) |
| H-abstraction to cyclenyl | 2.23765e-25 (3.53e-11) | 2.23765e-25 (3.53e-11) |

| species                       | PYtrue      | Cumul    | PYeffective | Cumul    |
|-------------------------------|-------------|----------|-------------|----------|
| rad19anti                     | 0.798825    | 0.798825 | 0.798825    | 0.798825 |
| rad9                          | 0.201084    | 0.999909 | 0.201084    | 0.999909 |
| rad8                          | 6.26573e-05 | 0.999972 | 6.26573e-05 | 0.999972 |
| rad15                         | 2.20968e-05 | 0.999994 | 2.20968e-05 | 0.999994 |
| rad12                         | 3.35499e-06 | 0.999997 | 3.35499e-06 | 0.999997 |
| Benzene+cycloprop-2-enylidene | 2.86508e-06 | 1.00000  | 2.86508e-06 | 1.00000  |
| Indene+H                      | 4.26222e-08 | 1.00000  | 4.26222e-08 | 1.00000  |
| PhCHCCH2+H                    | 2.15900e-10 | 1.00000  | 2.15900e-10 | 1.00000  |
| rad7                          | 1.46147e-10 | 1.00000  | 1.46147e-10 | 1.00000  |
| Benzene+cycloprop-1-enylidene | 3.52865e-11 | 1.00000  | 3.52865e-11 | 1.00000  |
| rad11                         | 1.08885e-11 | 1.00000  | 1.08885e-11 | 1.00000  |
| rad2                          | 7.99675e-12 | 1.00000  | 7.99675e-12 | 1.00000  |
| rad1                          | 1.16913e-12 | 1.00000  | 1.16913e-12 | 1.00000  |
| rad6                          | 6.96214e-13 | 1.00000  | 6.96214e-13 | 1.00000  |
| rad26                         | 6.46831e-13 | 1.00000  | 6.46831e-13 | 1.00000  |
| rad21                         | 5.76073e-13 | 1.00000  | 5.76073e-13 | 1.00000  |
| rad18                         | 3.86272e-13 | 1.00000  | 3.86272e-13 | 1.00000  |
| PhcycC3H3_A+H                 | 2.28477e-13 | 1.00000  | 2.28477e-13 | 1.00000  |
| rad5                          | 1.08018e-13 | 1.00000  | 1.08018e-13 | 1.00000  |
| rad20                         | 7.51385e-14 | 1.00000  | 7.51385e-14 | 1.00000  |
| rad22                         | 2.58392e-14 | 1.00000  | 2.58392e-14 | 1.00000  |
| Phenyl+cycC3H4                | 2.47117e-14 | 1.00000  | 0.00000     | 1.00000  |
| rad45                         | 5.44414e-15 | 1.00000  | 5.44414e-15 | 1.00000  |
| rad67                         | 5.04399e-15 | 1.00000  | 5.04399e-15 | 1.00000  |
| rad35                         | 2.28310e-15 | 1.00000  | 2.28310e-15 | 1.00000  |
| rad24                         | 1.05419e-15 | 1.00000  | 1.05419e-15 | 1.00000  |
| rad36                         | 6.11312e-16 | 1.00000  | 6.11312e-16 | 1.00000  |
| rad10                         | 5.07197e-16 | 1.00000  | 5.07197e-16 | 1.00000  |
| C2H2+PhCH2                    | 3.86774e-16 | 1.00000  | 3.86774e-16 | 1.00000  |
| PhcycC3H3_B+H                 | 3.06504e-16 | 1.00000  | 3.06504e-16 | 1.00000  |
| rad3                          | 1.30239e-16 | 1.00000  | 1.30239e-16 | 1.00000  |
| rad4                          | 8.66537e-17 | 1.00000  | 8.66537e-17 | 1.00000  |
| PhCCCH3+H                     | 4.28924e-17 | 1.00000  | 4.28924e-17 | 1.00000  |
| Ph+MeAc                       | 3.01574e-17 | 1.00000  | 3.01574e-17 | 1.00000  |
| PhCCH+CH3                     | 2.81220e-17 | 1.00000  | 2.81220e-17 | 1.00000  |

|            |             |         |             |         |
|------------|-------------|---------|-------------|---------|
| rad25      | 1.47547e-17 | 1.00000 | 1.47547e-17 | 1.00000 |
| Ph+Allene  | 1.11678e-17 | 1.00000 | 1.11678e-17 | 1.00000 |
| rad23      | 6.82457e-18 | 1.00000 | 6.82457e-18 | 1.00000 |
| rad27      | 6.71529e-18 | 1.00000 | 6.71529e-18 | 1.00000 |
| rad13      | 6.45032e-18 | 1.00000 | 6.45032e-18 | 1.00000 |
| PhCH2CCH+H | 1.88097e-18 | 1.00000 | 1.88097e-18 | 1.00000 |
| rad30      | 5.33599e-19 | 1.00000 | 5.33599e-19 | 1.00000 |
| rad33      | 1.23278e-19 | 1.00000 | 1.23278e-19 | 1.00000 |
| rad37      | 8.05719e-21 | 1.00000 | 8.05719e-21 | 1.00000 |
| rad31      | 4.41772e-21 | 1.00000 | 4.41772e-21 | 1.00000 |
| rad28      | 3.53511e-21 | 1.00000 | 3.53511e-21 | 1.00000 |
| rad60syn   | 1.69247e-21 | 1.00000 | 1.69247e-21 | 1.00000 |
| rad60anti  | 8.10735e-22 | 1.00000 | 8.10735e-22 | 1.00000 |
| rad14      | 6.27921e-22 | 1.00000 | 6.27921e-22 | 1.00000 |
| PAH3+H     | 5.69297e-22 | 1.00000 | 5.69297e-22 | 1.00000 |
| rad19syn   | 5.06572e-22 | 1.00000 | 5.06572e-22 | 1.00000 |
| PAH7+H     | 1.70655e-22 | 1.00000 | 1.70655e-22 | 1.00000 |
| rad59      | 1.19407e-22 | 1.00000 | 1.19407e-22 | 1.00000 |
| rad38      | 2.53273e-23 | 1.00000 | 2.53273e-23 | 1.00000 |
| PAH10+CH3  | 9.71236e-24 | 1.00000 | 9.71236e-24 | 1.00000 |
| rad46      | 2.57085e-25 | 1.00000 | 2.57085e-25 | 1.00000 |
| rad43      | 5.46664e-26 | 1.00000 | 5.46664e-26 | 1.00000 |
| rad58      | 8.43594e-27 | 1.00000 | 8.43594e-27 | 1.00000 |
| PAH9+H     | 5.34613e-27 | 1.00000 | 5.34613e-27 | 1.00000 |
| rad70      | 4.49821e-27 | 1.00000 | 4.49821e-27 | 1.00000 |
| rad50      | 1.25344e-27 | 1.00000 | 1.25344e-27 | 1.00000 |
| PAH1+H     | 9.25238e-28 | 1.00000 | 9.25238e-28 | 1.00000 |
| rad39      | 1.96347e-28 | 1.00000 | 1.96347e-28 | 1.00000 |
| rad54      | 1.72385e-28 | 1.00000 | 1.72385e-28 | 1.00000 |
| rad34      | 7.11093e-29 | 1.00000 | 7.11093e-29 | 1.00000 |
| rad52      | 6.70531e-30 | 1.00000 | 6.70531e-30 | 1.00000 |
| rad41      | 3.33106e-30 | 1.00000 | 3.33106e-30 | 1.00000 |
| rad62      | 2.72476e-30 | 1.00000 | 2.72476e-30 | 1.00000 |
| rad51      | 1.82271e-30 | 1.00000 | 1.82271e-30 | 1.00000 |
| rad55      | 1.42529e-30 | 1.00000 | 1.42529e-30 | 1.00000 |
| rad47      | 1.47995e-31 | 1.00000 | 1.47995e-31 | 1.00000 |
| rad61      | 1.22063e-33 | 1.00000 | 1.22063e-33 | 1.00000 |
| rad42      | 6.97612e-34 | 1.00000 | 6.97612e-34 | 1.00000 |
| rad53      | 3.35182e-35 | 1.00000 | 3.35182e-35 | 1.00000 |
| rad65      | 2.38812e-35 | 1.00000 | 2.38812e-35 | 1.00000 |
| rad68syn   | 3.98818e-36 | 1.00000 | 3.98818e-36 | 1.00000 |
| rad68anti  | 3.10845e-36 | 1.00000 | 3.10845e-36 | 1.00000 |
| rad56      | 1.93922e-38 | 1.00000 | 1.93922e-38 | 1.00000 |
| rad40syn   | 5.29849e-39 | 1.00000 | 5.29849e-39 | 1.00000 |
| rad40anti  | 3.97523e-39 | 1.00000 | 3.97523e-39 | 1.00000 |
| rad64      | 1.39795e-39 | 1.00000 | 1.39795e-39 | 1.00000 |
| PAH8+H     | 3.77566e-40 | 1.00000 | 3.77566e-40 | 1.00000 |
| rad73      | 2.23856e-42 | 1.00000 | 2.23856e-42 | 1.00000 |
| rad71      | 4.59203e-45 | 1.00000 | 4.59203e-45 | 1.00000 |

10000000.0 Pa, 160.000000 K

=====

| Rate constant             | True (fraction)        | Effective (fraction)   |
|---------------------------|------------------------|------------------------|
| Total                     | 7.84423e-15 (1.00 )    | 7.84423e-15 (1.00 )    |
| Formation of rad19        | 7.84418e-15 (1.000 )   | 7.84418e-15 (1.000 )   |
| H-abstraction to cyc2enyl | 5.05321e-20 (6.44e-06) | 5.05321e-20 (6.44e-06) |
| H-abstraction to cyclenyl | 1.29479e-24 (1.65e-10) | 1.29479e-24 (1.65e-10) |

| species                       | PYtrue      | Cumul    | PYeffective | Cumul    |
|-------------------------------|-------------|----------|-------------|----------|
| rad19anti                     | 0.785230    | 0.785230 | 0.785230    | 0.785230 |
| rad9                          | 0.214684    | 0.999914 | 0.214684    | 0.999914 |
| rad8                          | 5.02759e-05 | 0.999964 | 5.02759e-05 | 0.999964 |
| rad15                         | 2.56845e-05 | 0.999990 | 2.56845e-05 | 0.999990 |
| Benzene+cycloprop-2-enylidene | 6.44194e-06 | 0.999996 | 6.44194e-06 | 0.999996 |
| rad12                         | 3.44688e-06 | 0.999999 | 3.44688e-06 | 0.999999 |
| Indene+H                      | 5.41699e-08 | 0.999999 | 5.41699e-08 | 0.999999 |
| PhCHCCH2+H                    | 2.66568e-10 | 0.999999 | 2.66568e-10 | 0.999999 |
| Benzene+cycloprop-1-enylidene | 1.65062e-10 | 0.999999 | 1.65062e-10 | 0.999999 |
| rad7                          | 1.59270e-10 | 0.999999 | 1.59270e-10 | 0.999999 |
| rad11                         | 1.35122e-11 | 0.999999 | 1.35122e-11 | 0.999999 |
| rad2                          | 9.94515e-12 | 0.999999 | 9.94515e-12 | 0.999999 |
| rad1                          | 1.43686e-12 | 0.999999 | 1.43686e-12 | 0.999999 |
| rad6                          | 8.34296e-13 | 0.999999 | 8.34296e-13 | 0.999999 |
| rad26                         | 8.34216e-13 | 0.999999 | 8.34216e-13 | 0.999999 |
| rad21                         | 7.21638e-13 | 0.999999 | 7.21638e-13 | 0.999999 |
| rad18                         | 5.11978e-13 | 0.999999 | 5.11978e-13 | 0.999999 |
| PhcycC3H3_A+H                 | 3.36537e-13 | 0.999999 | 3.36537e-13 | 0.999999 |
| rad5                          | 1.21872e-13 | 0.999999 | 1.21872e-13 | 0.999999 |

|                |             |          |             |          |
|----------------|-------------|----------|-------------|----------|
| rad20          | 9.95003e-14 | 0.999999 | 9.95003e-14 | 0.999999 |
| Phenyl+cycC3H4 | 3.68056e-14 | 0.999999 | 0.00000     | 0.999999 |
| rad22          | 3.53701e-14 | 0.999999 | 3.53701e-14 | 0.999999 |
| rad45          | 7.65112e-15 | 0.999999 | 7.65112e-15 | 0.999999 |
| rad67          | 6.96998e-15 | 0.999999 | 6.96998e-15 | 0.999999 |
| rad35          | 3.14368e-15 | 0.999999 | 3.14368e-15 | 0.999999 |
| rad24          | 1.29982e-15 | 0.999999 | 1.29982e-15 | 0.999999 |
| rad36          | 8.48897e-16 | 0.999999 | 8.48897e-16 | 0.999999 |
| rad10          | 7.05931e-16 | 0.999999 | 7.05931e-16 | 0.999999 |
| PhcycC3H3_B+H  | 6.81242e-16 | 0.999999 | 6.81242e-16 | 0.999999 |
| C2H2+PhCH2     | 5.58993e-16 | 0.999999 | 5.58993e-16 | 0.999999 |
| rad3           | 1.82693e-16 | 0.999999 | 1.82693e-16 | 0.999999 |
| rad4           | 1.21116e-16 | 0.999999 | 1.21116e-16 | 0.999999 |
| PhCCCH3+H      | 6.17152e-17 | 0.999999 | 6.17152e-17 | 0.999999 |
| Ph+MeAc        | 4.39710e-17 | 0.999999 | 4.39710e-17 | 0.999999 |
| PhCCH+CH3      | 3.58666e-17 | 0.999999 | 3.58666e-17 | 0.999999 |
| rad25          | 2.07425e-17 | 0.999999 | 2.07425e-17 | 0.999999 |
| Ph+Allene      | 1.63607e-17 | 0.999999 | 1.63607e-17 | 0.999999 |
| rad23          | 1.05181e-17 | 0.999999 | 1.05181e-17 | 0.999999 |
| rad27          | 9.50210e-18 | 0.999999 | 9.50210e-18 | 0.999999 |
| rad13          | 8.51951e-18 | 0.999999 | 8.51951e-18 | 0.999999 |
| PhCH2CCH+H     | 2.82438e-18 | 0.999999 | 2.82438e-18 | 0.999999 |
| rad30          | 8.09425e-19 | 0.999999 | 8.09425e-19 | 0.999999 |
| rad33          | 1.61932e-19 | 0.999999 | 1.61932e-19 | 0.999999 |
| rad37          | 1.25513e-20 | 0.999999 | 1.25513e-20 | 0.999999 |
| rad28          | 5.52228e-21 | 0.999999 | 5.52228e-21 | 0.999999 |
| rad31          | 5.19834e-21 | 0.999999 | 5.19834e-21 | 0.999999 |
| rad60syn       | 2.66795e-21 | 0.999999 | 2.66795e-21 | 0.999999 |
| rad60anti      | 1.28249e-21 | 0.999999 | 1.28249e-21 | 0.999999 |
| rad14          | 1.02166e-21 | 0.999999 | 1.02166e-21 | 0.999999 |
| PAH3+H         | 9.42237e-22 | 0.999999 | 9.42237e-22 | 0.999999 |
| rad19syn       | 4.73144e-22 | 0.999999 | 4.73144e-22 | 0.999999 |
| PAH7+H         | 2.81956e-22 | 0.999999 | 2.81956e-22 | 0.999999 |
| rad59          | 1.96222e-22 | 0.999999 | 1.96222e-22 | 0.999999 |
| rad38          | 4.23985e-23 | 0.999999 | 4.23985e-23 | 0.999999 |
| PAH10+CH3      | 1.73277e-23 | 0.999999 | 1.73277e-23 | 0.999999 |
| rad46          | 4.46963e-25 | 0.999999 | 4.46963e-25 | 0.999999 |
| rad43          | 1.04991e-25 | 0.999999 | 1.04991e-25 | 0.999999 |
| rad58          | 1.66584e-26 | 0.999999 | 1.66584e-26 | 0.999999 |
| PAH9+H         | 9.94669e-27 | 0.999999 | 9.94669e-27 | 0.999999 |
| rad70          | 9.14055e-27 | 0.999999 | 9.14055e-27 | 0.999999 |
| rad50          | 2.37559e-27 | 0.999999 | 2.37559e-27 | 0.999999 |
| PAH1+H         | 1.96174e-27 | 0.999999 | 1.96174e-27 | 0.999999 |
| rad39          | 3.82674e-28 | 0.999999 | 3.82674e-28 | 0.999999 |
| rad54          | 3.08444e-28 | 0.999999 | 3.08444e-28 | 0.999999 |
| rad34          | 1.60901e-28 | 0.999999 | 1.60901e-28 | 0.999999 |
| rad52          | 1.37166e-29 | 0.999999 | 1.37166e-29 | 0.999999 |
| rad41          | 8.56833e-30 | 0.999999 | 8.56833e-30 | 0.999999 |
| rad62          | 6.47069e-30 | 0.999999 | 6.47069e-30 | 0.999999 |
| rad51          | 4.01630e-30 | 0.999999 | 4.01630e-30 | 0.999999 |
| rad55          | 2.75777e-30 | 0.999999 | 2.75777e-30 | 0.999999 |
| rad47          | 3.76342e-31 | 0.999999 | 3.76342e-31 | 0.999999 |
| rad61          | 6.16517e-33 | 0.999999 | 6.16517e-33 | 0.999999 |
| rad42          | 2.16951e-33 | 0.999999 | 2.16951e-33 | 0.999999 |
| rad53          | 1.09796e-34 | 0.999999 | 1.09796e-34 | 0.999999 |
| rad65          | 6.00555e-35 | 0.999999 | 6.00555e-35 | 0.999999 |
| rad68syn       | 2.63395e-35 | 0.999999 | 2.63395e-35 | 0.999999 |
| rad68anti      | 2.03536e-35 | 0.999999 | 2.03536e-35 | 0.999999 |
| rad56          | 1.21384e-37 | 0.999999 | 1.21384e-37 | 0.999999 |
| rad40syn       | 5.83955e-38 | 0.999999 | 5.83955e-38 | 0.999999 |
| rad40anti      | 4.36030e-38 | 0.999999 | 4.36030e-38 | 0.999999 |
| rad64          | 6.66498e-39 | 0.999999 | 6.66498e-39 | 0.999999 |
| PAH8+H         | 5.68895e-39 | 0.999999 | 5.68895e-39 | 0.999999 |
| rad73          | 2.66642e-41 | 0.999999 | 2.66642e-41 | 0.999999 |
| rad71          | 8.68615e-44 | 0.999999 | 8.68615e-44 | 0.999999 |

10000000.0 Pa, 170.000000 K

| Rate constant             | True (fraction)        | Effective (fraction)   |             |          |
|---------------------------|------------------------|------------------------|-------------|----------|
| Total                     | 9.49598e-15 (1.00 )    | 9.49598e-15 (1.00 )    |             |          |
| Formation of rad19        | 9.49586e-15 (1.000 )   | 9.49586e-15 (1.000 )   |             |          |
| H-abstraction to cyc2enyl | 1.24279e-19 (1.31e-05) | 1.24279e-19 (1.31e-05) |             |          |
| H-abstraction to cyclenyl | 6.08025e-24 (6.40e-10) | 6.08025e-24 (6.40e-10) |             |          |
| species                   | PYtrue                 | Cumul                  | PYeffective | Cumul    |
| rad19anti                 | 0.771444               | 0.771444               | 0.771444    | 0.771444 |
| rad9                      | 0.228469               | 0.999913               | 0.228469    | 0.999913 |
| rad8                      | 4.04634e-05            | 0.999953               | 4.04634e-05 | 0.999953 |

|                               |             |          |             |          |
|-------------------------------|-------------|----------|-------------|----------|
| rad15                         | 2.96927e-05 | 0.999983 | 2.96927e-05 | 0.999983 |
| Benzene+cycloprop-2-enylidene | 1.30875e-05 | 0.999996 | 1.30875e-05 | 0.999996 |
| rad12                         | 3.53187e-06 | 1.000000 | 3.53187e-06 | 1.000000 |
| Indene+H                      | 6.83637e-08 | 1.000000 | 6.83637e-08 | 1.000000 |
| Benzene+cycloprop-1-enylidene | 6.40297e-10 | 1.000000 | 6.40297e-10 | 1.000000 |
| PhCHCCH2+H                    | 3.28793e-10 | 1.000000 | 3.28793e-10 | 1.000000 |
| rad7                          | 1.74282e-10 | 1.000000 | 1.74282e-10 | 1.000000 |
| rad11                         | 1.67550e-11 | 1.000000 | 1.67550e-11 | 1.000000 |
| rad2                          | 1.23616e-11 | 1.000000 | 1.23616e-11 | 1.000000 |
| rad1                          | 1.76712e-12 | 1.000000 | 1.76712e-12 | 1.000000 |
| rad26                         | 1.07222e-12 | 1.000000 | 1.07222e-12 | 1.000000 |
| rad6                          | 1.00297e-12 | 1.000000 | 1.00297e-12 | 1.000000 |
| rad21                         | 9.04259e-13 | 1.000000 | 9.04259e-13 | 1.000000 |
| rad18                         | 6.76069e-13 | 1.000000 | 6.76069e-13 | 1.000000 |
| PhcycC3H3_A+H                 | 5.00216e-13 | 1.000000 | 5.00216e-13 | 1.000000 |
| rad5                          | 1.37693e-13 | 1.000000 | 1.37693e-13 | 1.000000 |
| rad20                         | 1.32169e-13 | 1.000000 | 1.32169e-13 | 1.000000 |
| Phenyl+cycC3H4                | 5.47020e-14 | 1.000000 | 0.00000     | 1.000000 |
| rad22                         | 4.83733e-14 | 1.000000 | 4.83733e-14 | 1.000000 |
| rad45                         | 1.07269e-14 | 1.000000 | 1.07269e-14 | 1.000000 |
| rad67                         | 9.62867e-15 | 1.000000 | 9.62867e-15 | 1.000000 |
| rad35                         | 4.32616e-15 | 1.000000 | 4.32616e-15 | 1.000000 |
| rad24                         | 1.60151e-15 | 1.000000 | 1.60151e-15 | 1.000000 |
| PhcycC3H3_B+H                 | 1.46962e-15 | 1.000000 | 1.46962e-15 | 1.000000 |
| rad36                         | 1.17720e-15 | 1.000000 | 1.17720e-15 | 1.000000 |
| rad10                         | 9.83149e-16 | 1.000000 | 9.83149e-16 | 1.000000 |
| C2H2+PhCH2                    | 8.16164e-16 | 1.000000 | 8.16164e-16 | 1.000000 |
| rad3                          | 2.56541e-16 | 1.000000 | 2.56541e-16 | 1.000000 |
| rad4                          | 1.69521e-16 | 1.000000 | 1.69521e-16 | 1.000000 |
| PhCCCH3+H                     | 8.92234e-17 | 1.000000 | 8.92234e-17 | 1.000000 |
| Ph+MeAc                       | 6.45568e-17 | 1.000000 | 6.45568e-17 | 1.000000 |
| PhCCH+CH3                     | 4.58615e-17 | 1.000000 | 4.58615e-17 | 1.000000 |
| rad25                         | 2.92046e-17 | 1.000000 | 2.92046e-17 | 1.000000 |
| Ph+Allene                     | 2.41000e-17 | 1.000000 | 2.41000e-17 | 1.000000 |
| rad23                         | 1.61933e-17 | 1.000000 | 1.61933e-17 | 1.000000 |
| rad27                         | 1.34727e-17 | 1.000000 | 1.34727e-17 | 1.000000 |
| rad13                         | 1.12874e-17 | 1.000000 | 1.12874e-17 | 1.000000 |
| PhCH2CCH+H                    | 4.27420e-18 | 1.000000 | 4.27420e-18 | 1.000000 |
| rad30                         | 1.22773e-18 | 1.000000 | 1.22773e-18 | 1.000000 |
| rad33                         | 2.13305e-19 | 1.000000 | 2.13305e-19 | 1.000000 |
| rad37                         | 1.96333e-20 | 1.000000 | 1.96333e-20 | 1.000000 |
| rad28                         | 8.66979e-21 | 1.000000 | 8.66979e-21 | 1.000000 |
| rad31                         | 6.17713e-21 | 1.000000 | 6.17713e-21 | 1.000000 |
| rad60syn                      | 4.22142e-21 | 1.000000 | 4.22142e-21 | 1.000000 |
| rad60anti                     | 2.03704e-21 | 1.000000 | 2.03704e-21 | 1.000000 |
| rad14                         | 1.67306e-21 | 1.000000 | 1.67306e-21 | 1.000000 |
| PAH3+H                        | 1.57281e-21 | 1.000000 | 1.57281e-21 | 1.000000 |
| rad19syn                      | 4.98787e-22 | 1.000000 | 4.98787e-22 | 1.000000 |
| PAH7+H                        | 4.70589e-22 | 1.000000 | 4.70589e-22 | 1.000000 |
| rad59                         | 3.24953e-22 | 1.000000 | 3.24953e-22 | 1.000000 |
| rad38                         | 7.16261e-23 | 1.000000 | 7.16261e-23 | 1.000000 |
| PAH10+CH3                     | 3.13822e-23 | 1.000000 | 3.13822e-23 | 1.000000 |
| rad46                         | 7.82876e-25 | 1.000000 | 7.82876e-25 | 1.000000 |
| rad43                         | 2.05797e-25 | 1.000000 | 2.05797e-25 | 1.000000 |
| rad58                         | 3.35546e-26 | 1.000000 | 3.35546e-26 | 1.000000 |
| rad70                         | 1.90130e-26 | 1.000000 | 1.90130e-26 | 1.000000 |
| PAH9+H                        | 1.87129e-26 | 1.000000 | 1.87129e-26 | 1.000000 |
| rad50                         | 4.57320e-27 | 1.000000 | 4.57320e-27 | 1.000000 |
| PAH1+H                        | 4.24317e-27 | 1.000000 | 4.24317e-27 | 1.000000 |
| rad39                         | 7.60388e-28 | 1.000000 | 7.60388e-28 | 1.000000 |
| rad54                         | 5.62844e-28 | 1.000000 | 5.62844e-28 | 1.000000 |
| rad34                         | 3.73320e-28 | 1.000000 | 3.73320e-28 | 1.000000 |
| rad52                         | 2.86157e-29 | 1.000000 | 2.86157e-29 | 1.000000 |
| rad41                         | 2.25379e-29 | 1.000000 | 2.25379e-29 | 1.000000 |
| rad62                         | 1.58433e-29 | 1.000000 | 1.58433e-29 | 1.000000 |
| rad51                         | 9.06431e-30 | 1.000000 | 9.06431e-30 | 1.000000 |
| rad55                         | 5.45543e-30 | 1.000000 | 5.45543e-30 | 1.000000 |
| rad47                         | 9.73832e-31 | 1.000000 | 9.73832e-31 | 1.000000 |
| rad61                         | 2.94165e-32 | 1.000000 | 2.94165e-32 | 1.000000 |
| rad42                         | 6.95131e-33 | 1.000000 | 6.95131e-33 | 1.000000 |
| rad53                         | 3.53460e-34 | 1.000000 | 3.53460e-34 | 1.000000 |
| rad68syn                      | 1.61229e-34 | 1.000000 | 1.61229e-34 | 1.000000 |
| rad65                         | 1.56573e-34 | 1.000000 | 1.56573e-34 | 1.000000 |
| rad68anti                     | 1.23436e-34 | 1.000000 | 1.23436e-34 | 1.000000 |
| rad56                         | 6.83036e-37 | 1.000000 | 6.83036e-37 | 1.000000 |
| rad40syn                      | 5.71415e-37 | 1.000000 | 5.71415e-37 | 1.000000 |
| rad40anti                     | 4.24692e-37 | 1.000000 | 4.24692e-37 | 1.000000 |
| PAH8+H                        | 7.36417e-38 | 1.000000 | 7.36417e-38 | 1.000000 |
| rad64                         | 3.16782e-38 | 1.000000 | 3.16782e-38 | 1.000000 |
| rad73                         | 2.86487e-40 | 1.000000 | 2.86487e-40 | 1.000000 |



rad71 | 1.39073e-42 1.000000 | 1.39073e-42 1.000000

10000000.0 Pa, 180.000000 K

=====

| Rate constant             | True (fraction)        | Effective (fraction)   |
|---------------------------|------------------------|------------------------|
| Total                     | 1.12884e-14 (1.00 )    | 1.12884e-14 (1.00 )    |
| Formation of rad19        | 1.12881e-14 (1.000 )   | 1.12881e-14 (1.000 )   |
| H-abstraction to cyc2enyl | 2.75916e-19 (2.44e-05) | 2.75916e-19 (2.44e-05) |
| H-abstraction to cyc1enyl | 2.39955e-23 (2.13e-09) | 2.39955e-23 (2.13e-09) |

| species                       | PYtrue      | Cumul    | PYeffective | Cumul    |
|-------------------------------|-------------|----------|-------------|----------|
| rad19anti                     | 0.757415    | 0.757415 | 0.757415    | 0.757415 |
| rad9                          | 0.242489    | 0.999905 | 0.242489    | 0.999905 |
| rad15                         | 3.41814e-05 | 0.999939 | 3.41814e-05 | 0.999939 |
| rad8                          | 3.26527e-05 | 0.999971 | 3.26527e-05 | 0.999971 |
| Benzene+cycloprop-2-enylidene | 2.44424e-05 | 0.999996 | 2.44424e-05 | 0.999996 |
| rad12                         | 3.61192e-06 | 0.999999 | 3.61192e-06 | 0.999999 |
| Indene+H                      | 8.58407e-08 | 1.000000 | 8.58407e-08 | 1.000000 |
| Benzene+cycloprop-1-enylidene | 2.12567e-09 | 1.000000 | 2.12567e-09 | 1.000000 |
| PhCHCH2+H                     | 4.05795e-10 | 1.000000 | 4.05795e-10 | 1.000000 |
| rad7                          | 1.91537e-10 | 1.000000 | 1.91537e-10 | 1.000000 |
| rad11                         | 2.07945e-11 | 1.000000 | 2.07945e-11 | 1.000000 |
| rad2                          | 1.53827e-11 | 1.000000 | 1.53827e-11 | 1.000000 |
| rad1                          | 2.17819e-12 | 1.000000 | 2.17819e-12 | 1.000000 |
| rad26                         | 1.37632e-12 | 1.000000 | 1.37632e-12 | 1.000000 |
| rad6                          | 1.21079e-12 | 1.000000 | 1.21079e-12 | 1.000000 |
| rad21                         | 1.13534e-12 | 1.000000 | 1.13534e-12 | 1.000000 |
| rad18                         | 8.91471e-13 | 1.000000 | 8.91471e-13 | 1.000000 |
| PhcycC3H3_A+H                 | 7.50581e-13 | 1.000000 | 7.50581e-13 | 1.000000 |
| rad20                         | 1.76378e-13 | 1.000000 | 1.76378e-13 | 1.000000 |
| rad5                          | 1.55919e-13 | 1.000000 | 1.55919e-13 | 1.000000 |
| Phenyl+cycC3H4                | 8.11728e-14 | 1.000000 | 0.000000    | 1.000000 |
| rad22                         | 6.62623e-14 | 1.000000 | 6.62623e-14 | 1.000000 |
| rad45                         | 1.50464e-14 | 1.000000 | 1.50464e-14 | 1.000000 |
| rad67                         | 1.33326e-14 | 1.000000 | 1.33326e-14 | 1.000000 |
| rad35                         | 5.96552e-15 | 1.000000 | 5.96552e-15 | 1.000000 |
| PhcycC3H3_B+H                 | 3.09651e-15 | 1.000000 | 3.09651e-15 | 1.000000 |
| rad24                         | 1.97560e-15 | 1.000000 | 1.97560e-15 | 1.000000 |
| rad36                         | 1.63483e-15 | 1.000000 | 1.63483e-15 | 1.000000 |
| rad10                         | 1.37385e-15 | 1.000000 | 1.37385e-15 | 1.000000 |
| C2H2+PhCH2                    | 1.20671e-15 | 1.000000 | 1.20671e-15 | 1.000000 |
| rad3                          | 3.61631e-16 | 1.000000 | 3.61631e-16 | 1.000000 |
| rad4                          | 2.38262e-16 | 1.000000 | 2.38262e-16 | 1.000000 |
| PhCCCH3+H                     | 1.30000e-16 | 1.000000 | 1.30000e-16 | 1.000000 |
| Ph+MeAc                       | 9.57294e-17 | 1.000000 | 9.57294e-17 | 1.000000 |
| PhCCH+CH3                     | 5.89031e-17 | 1.000000 | 5.89031e-17 | 1.000000 |
| rad25                         | 4.12960e-17 | 1.000000 | 4.12960e-17 | 1.000000 |
| Ph+Allene                     | 3.58075e-17 | 1.000000 | 3.58075e-17 | 1.000000 |
| rad23                         | 2.49943e-17 | 1.000000 | 2.49943e-17 | 1.000000 |
| rad27                         | 1.91957e-17 | 1.000000 | 1.91957e-17 | 1.000000 |
| rad13                         | 1.50260e-17 | 1.000000 | 1.50260e-17 | 1.000000 |
| PhCH2CCH+H                    | 6.54036e-18 | 1.000000 | 6.54036e-18 | 1.000000 |
| rad30                         | 1.86880e-18 | 1.000000 | 1.86880e-18 | 1.000000 |
| rad33                         | 2.82191e-19 | 1.000000 | 2.82191e-19 | 1.000000 |
| rad37                         | 3.09521e-20 | 1.000000 | 3.09521e-20 | 1.000000 |
| rad28                         | 1.37294e-20 | 1.000000 | 1.37294e-20 | 1.000000 |
| rad31                         | 7.41999e-21 | 1.000000 | 7.41999e-21 | 1.000000 |
| rad60syn                      | 6.73080e-21 | 1.000000 | 6.73080e-21 | 1.000000 |
| rad60anti                     | 3.26159e-21 | 1.000000 | 3.26159e-21 | 1.000000 |
| rad14                         | 2.76906e-21 | 1.000000 | 2.76906e-21 | 1.000000 |
| PAH3+H                        | 2.65900e-21 | 1.000000 | 2.65900e-21 | 1.000000 |
| PAH7+H                        | 7.96694e-22 | 1.000000 | 7.96694e-22 | 1.000000 |
| rad19syn                      | 5.88357e-22 | 1.000000 | 5.88357e-22 | 1.000000 |
| rad59                         | 5.44560e-22 | 1.000000 | 5.44560e-22 | 1.000000 |
| rad38                         | 1.22594e-22 | 1.000000 | 1.22594e-22 | 1.000000 |
| PAH10+CH3                     | 5.79124e-23 | 1.000000 | 5.79124e-23 | 1.000000 |
| rad46                         | 1.38798e-24 | 1.000000 | 1.38798e-24 | 1.000000 |
| rad43                         | 4.13379e-25 | 1.000000 | 4.13379e-25 | 1.000000 |
| rad58                         | 6.91786e-26 | 1.000000 | 6.91786e-26 | 1.000000 |
| rad70                         | 4.06213e-26 | 1.000000 | 4.06213e-26 | 1.000000 |
| PAH9+H                        | 3.57977e-26 | 1.000000 | 3.57977e-26 | 1.000000 |
| PAH1+H                        | 9.38486e-27 | 1.000000 | 9.38486e-27 | 1.000000 |
| rad50                         | 8.98635e-27 | 1.000000 | 8.98635e-27 | 1.000000 |
| rad39                         | 1.54871e-27 | 1.000000 | 1.54871e-27 | 1.000000 |
| rad54                         | 1.04859e-27 | 1.000000 | 1.04859e-27 | 1.000000 |
| rad34                         | 8.90288e-28 | 1.000000 | 8.90288e-28 | 1.000000 |
| rad52                         | 6.11778e-29 | 1.000000 | 6.11778e-29 | 1.000000 |
| rad41                         | 6.07429e-29 | 1.000000 | 6.07429e-29 | 1.000000 |

|           |             |          |             |          |
|-----------|-------------|----------|-------------|----------|
| rad62     | 4.01797e-29 | 1.000000 | 4.01797e-29 | 1.000000 |
| rad51     | 2.10432e-29 | 1.000000 | 2.10432e-29 | 1.000000 |
| rad55     | 1.10318e-29 | 1.000000 | 1.10318e-29 | 1.000000 |
| rad47     | 2.56411e-30 | 1.000000 | 2.56411e-30 | 1.000000 |
| rad61     | 1.34026e-31 | 1.000000 | 1.34026e-31 | 1.000000 |
| rad42     | 2.30030e-32 | 1.000000 | 2.30030e-32 | 1.000000 |
| rad53     | 1.12114e-33 | 1.000000 | 1.12114e-33 | 1.000000 |
| rad68syn  | 9.27042e-34 | 1.000000 | 9.27042e-34 | 1.000000 |
| rad68anti | 7.02972e-34 | 1.000000 | 7.02972e-34 | 1.000000 |
| rad65     | 4.25004e-34 | 1.000000 | 4.25004e-34 | 1.000000 |
| rad40syn  | 5.01072e-36 | 1.000000 | 5.01072e-36 | 1.000000 |
| rad40anti | 3.70913e-36 | 1.000000 | 3.70913e-36 | 1.000000 |
| rad56     | 3.51978e-36 | 1.000000 | 3.51978e-36 | 1.000000 |
| PAH8+H    | 8.22492e-37 | 1.000000 | 8.22492e-37 | 1.000000 |
| rad64     | 1.50856e-37 | 1.000000 | 1.50856e-37 | 1.000000 |
| rad73     | 2.78702e-39 | 1.000000 | 2.78702e-39 | 1.000000 |
| rad71     | 1.88604e-41 | 1.000000 | 1.88604e-41 | 1.000000 |

10000000.0 Pa, 190.000000 K

| Rate constant             | True (fraction)        | Effective (fraction)   |
|---------------------------|------------------------|------------------------|
| Total                     | 1.32132e-14 (1.00 )    | 1.32132e-14 (1.00 )    |
| Formation of rad19        | 1.32126e-14 (1.000 )   | 1.32126e-14 (1.000 )   |
| H-abstraction to cyc2enyl | 5.62053e-19 (4.25e-05) | 5.62053e-19 (4.25e-05) |
| H-abstraction to cyclenyl | 8.18073e-23 (6.19e-09) | 8.18073e-23 (6.19e-09) |

| species                       | PYtrue      | Cumul    | PYeffective | Cumul    |
|-------------------------------|-------------|----------|-------------|----------|
| rad19anti                     | 0.743094    | 0.743094 | 0.743094    | 0.743094 |
| rad9                          | 0.256793    | 0.999887 | 0.256793    | 0.999887 |
| Benzene+cycloprop-2-enylidene | 4.25373e-05 | 0.999930 | 4.25373e-05 | 0.999930 |
| rad15                         | 3.92228e-05 | 0.999969 | 3.92228e-05 | 0.999969 |
| rad8                          | 2.64113e-05 | 0.999996 | 2.64113e-05 | 0.999996 |
| rad12                         | 3.68868e-06 | 0.999999 | 3.68868e-06 | 0.999999 |
| Indene+H                      | 1.07424e-07 | 0.999999 | 1.07424e-07 | 0.999999 |
| Benzene+cycloprop-1-enylidene | 6.19133e-09 | 0.999999 | 6.19133e-09 | 0.999999 |
| PhCHCCH2+H                    | 5.01889e-10 | 0.999999 | 5.01889e-10 | 0.999999 |
| rad7                          | 2.11456e-10 | 0.999999 | 2.11456e-10 | 0.999999 |
| rad11                         | 2.58700e-11 | 0.999999 | 2.58700e-11 | 0.999999 |
| rad2                          | 1.91931e-11 | 0.999999 | 1.91931e-11 | 0.999999 |
| rad1                          | 2.69483e-12 | 0.999999 | 2.69483e-12 | 0.999999 |
| rad26                         | 1.76767e-12 | 0.999999 | 1.76767e-12 | 0.999999 |
| rad6                          | 1.46902e-12 | 0.999999 | 1.46902e-12 | 0.999999 |
| rad21                         | 1.43043e-12 | 0.999999 | 1.43043e-12 | 0.999999 |
| rad18                         | 1.17620e-12 | 0.999999 | 1.17620e-12 | 0.999999 |
| PhcycC3H3_A+H                 | 1.13730e-12 | 0.999999 | 1.13730e-12 | 0.999999 |
| rad20                         | 2.36809e-13 | 0.999999 | 2.36809e-13 | 0.999999 |
| rad5                          | 1.77096e-13 | 0.999999 | 1.77096e-13 | 0.999999 |
| Phenyl+cycC3H4                | 1.20286e-13 | 0.999999 | 0.00000     | 0.999999 |
| rad22                         | 9.11136e-14 | 0.999999 | 9.11136e-14 | 0.999999 |
| rad45                         | 2.11697e-14 | 0.999999 | 2.11697e-14 | 0.999999 |
| rad67                         | 1.85480e-14 | 0.999999 | 1.85480e-14 | 0.999999 |
| rad35                         | 8.26212e-15 | 0.999999 | 8.26212e-15 | 0.999999 |
| PhcycC3H3_B+H                 | 6.40685e-15 | 0.999999 | 6.40685e-15 | 0.999999 |
| rad24                         | 2.44416e-15 | 0.999999 | 2.44416e-15 | 0.999999 |
| rad36                         | 2.27924e-15 | 0.999999 | 2.27924e-15 | 0.999999 |
| rad10                         | 1.93115e-15 | 0.999999 | 1.93115e-15 | 0.999999 |
| C2H2+PhCH2                    | 1.81074e-15 | 0.999999 | 1.81074e-15 | 0.999999 |
| rad3                          | 5.13061e-16 | 0.999999 | 5.13061e-16 | 0.999999 |
| rad4                          | 3.37137e-16 | 0.999999 | 3.37137e-16 | 0.999999 |
| PhCCCH3+H                     | 1.91420e-16 | 0.999999 | 1.91420e-16 | 0.999999 |
| Ph+MeAc                       | 1.43784e-16 | 0.999999 | 1.43784e-16 | 0.999999 |
| PhCCH+CH3                     | 7.61192e-17 | 0.999999 | 7.61192e-17 | 0.999999 |
| rad25                         | 5.87934e-17 | 0.999999 | 5.87934e-17 | 0.999999 |
| Ph+Allene                     | 5.38176e-17 | 0.999999 | 5.38176e-17 | 0.999999 |
| rad23                         | 3.88045e-17 | 0.999999 | 3.88045e-17 | 0.999999 |
| rad27                         | 2.75542e-17 | 0.999999 | 2.75542e-17 | 0.999999 |
| rad13                         | 2.01259e-17 | 0.999999 | 2.01259e-17 | 0.999999 |
| PhCH2CCH+H                    | 1.01501e-17 | 0.999999 | 1.01501e-17 | 0.999999 |
| rad30                         | 2.86407e-18 | 0.999999 | 2.86407e-18 | 0.999999 |
| rad33                         | 3.75373e-19 | 0.999999 | 3.75373e-19 | 0.999999 |
| rad37                         | 4.93429e-20 | 0.999999 | 4.93429e-20 | 0.999999 |
| rad28                         | 2.20024e-20 | 0.999999 | 2.20024e-20 | 0.999999 |
| rad60syn                      | 1.08533e-20 | 0.999999 | 1.08533e-20 | 0.999999 |
| rad31                         | 9.01948e-21 | 0.999999 | 9.01948e-21 | 0.999999 |
| rad60anti                     | 5.28345e-21 | 0.999999 | 5.28345e-21 | 0.999999 |
| rad14                         | 4.65006e-21 | 0.999999 | 4.65006e-21 | 0.999999 |
| PAH3+H                        | 4.57043e-21 | 0.999999 | 4.57043e-21 | 0.999999 |
| PAH7+H                        | 1.37331e-21 | 0.999999 | 1.37331e-21 | 0.999999 |

|           |             |          |             |          |
|-----------|-------------|----------|-------------|----------|
| rad59     | 9.26979e-22 | 0.999999 | 9.26979e-22 | 0.999999 |
| rad19syn  | 7.70930e-22 | 0.999999 | 7.70930e-22 | 0.999999 |
| rad38     | 2.13348e-22 | 0.999999 | 2.13348e-22 | 0.999999 |
| PAH10+CH3 | 1.09248e-22 | 0.999999 | 1.09248e-22 | 0.999999 |
| rad46     | 2.50144e-24 | 0.999999 | 2.50144e-24 | 0.999999 |
| rad43     | 8.53936e-25 | 0.999999 | 8.53936e-25 | 0.999999 |
| rad58     | 1.46415e-25 | 0.999999 | 1.46415e-25 | 0.999999 |
| rad70     | 8.94028e-26 | 0.999999 | 8.94028e-26 | 0.999999 |
| PAH9+H    | 6.99990e-26 | 0.999999 | 6.99990e-26 | 0.999999 |
| PAH1+H    | 2.12699e-26 | 0.999999 | 2.12699e-26 | 0.999999 |
| rad50     | 1.81042e-26 | 0.999999 | 1.81042e-26 | 0.999999 |
| rad39     | 3.24890e-27 | 0.999999 | 3.24890e-27 | 0.999999 |
| rad34     | 2.18698e-27 | 0.999999 | 2.18698e-27 | 0.999999 |
| rad54     | 1.99477e-27 | 0.999999 | 1.99477e-27 | 0.999999 |
| rad41     | 1.68086e-28 | 0.999999 | 1.68086e-28 | 0.999999 |
| rad52     | 1.34603e-28 | 0.999999 | 1.34603e-28 | 0.999999 |
| rad62     | 1.05965e-28 | 0.999999 | 1.05965e-28 | 0.999999 |
| rad51     | 5.04382e-29 | 0.999999 | 5.04382e-29 | 0.999999 |
| rad55     | 2.27808e-29 | 0.999999 | 2.27808e-29 | 0.999999 |
| rad47     | 6.86707e-30 | 0.999999 | 6.86707e-30 | 0.999999 |
| rad61     | 5.89028e-31 | 0.999999 | 5.89028e-31 | 0.999999 |
| rad42     | 7.87974e-32 | 0.999999 | 7.87974e-32 | 0.999999 |
| rad68syn  | 5.06467e-33 | 0.999999 | 5.06467e-33 | 0.999999 |
| rad68anti | 3.80446e-33 | 0.999999 | 3.80446e-33 | 0.999999 |
| rad53     | 3.51193e-33 | 0.999999 | 3.51193e-33 | 0.999999 |
| rad65     | 1.20556e-33 | 0.999999 | 1.20556e-33 | 0.999999 |
| rad40syn  | 3.96567e-35 | 0.999999 | 3.96567e-35 | 0.999999 |
| rad40anti | 2.92664e-35 | 0.999999 | 2.92664e-35 | 0.999999 |
| rad56     | 1.68663e-35 | 0.999999 | 1.68663e-35 | 0.999999 |
| PAH8+H    | 7.96527e-36 | 0.999999 | 7.96527e-36 | 0.999999 |
| rad64     | 7.21950e-37 | 0.999999 | 7.21950e-37 | 0.999999 |
| rad73     | 2.45719e-38 | 0.999999 | 2.45719e-38 | 0.999999 |
| rad71     | 2.17429e-40 | 0.999999 | 2.17429e-40 | 0.999999 |

10000000.0 Pa, 200.000000 K

=====

| Rate constant             | True (fraction)        | Effective (fraction)   |
|---------------------------|------------------------|------------------------|
| Total                     | 1.52621e-14 (1.00 )    | 1.52621e-14 (1.00 )    |
| Formation of rad19        | 1.52610e-14 (1.000 )   | 1.52610e-14 (1.000 )   |
| H-abstraction to cyc2enyl | 1.06427e-18 (6.97e-05) | 1.06427e-18 (6.97e-05) |
| H-abstraction to cyclenyl | 2.46309e-22 (1.61e-08) | 2.46309e-22 (1.61e-08) |

| species                       | PYtrue      | Cumul    | PYeffective | Cumul    |
|-------------------------------|-------------|----------|-------------|----------|
| rad19anti                     | 0.728431    | 0.728431 | 0.728431    | 0.728431 |
| rad9                          | 0.271429    | 0.999860 | 0.271429    | 0.999860 |
| Benzene+cycloprop-2-enylidene | 6.97330e-05 | 0.999930 | 6.97330e-05 | 0.999930 |
| rad15                         | 4.49041e-05 | 0.999975 | 4.49041e-05 | 0.999975 |
| rad8                          | 2.14065e-05 | 0.999996 | 2.14065e-05 | 0.999996 |
| rad12                         | 3.76355e-06 | 1.00000  | 3.76355e-06 | 1.00000  |
| Indene+H                      | 1.34189e-07 | 1.00000  | 1.34189e-07 | 1.00000  |
| Benzene+cycloprop-1-enylidene | 1.61386e-08 | 1.00000  | 1.61386e-08 | 1.00000  |
| PhCHCCH2+H                    | 6.22900e-10 | 1.00000  | 6.22900e-10 | 1.00000  |
| rad7                          | 2.34534e-10 | 1.00000  | 2.34534e-10 | 1.00000  |
| rad11                         | 3.23066e-11 | 1.00000  | 3.23066e-11 | 1.00000  |
| rad2                          | 2.40445e-11 | 1.00000  | 2.40445e-11 | 1.00000  |
| rad1                          | 3.35086e-12 | 1.00000  | 3.35086e-12 | 1.00000  |
| rad26                         | 2.27540e-12 | 1.00000  | 2.27540e-12 | 1.00000  |
| rad21                         | 1.81090e-12 | 1.00000  | 1.81090e-12 | 1.00000  |
| rad6                          | 1.79251e-12 | 1.00000  | 1.79251e-12 | 1.00000  |
| PhcycC3H3_A+H                 | 1.74067e-12 | 1.00000  | 1.74067e-12 | 1.00000  |
| rad18                         | 1.55569e-12 | 1.00000  | 1.55569e-12 | 1.00000  |
| rad20                         | 3.20324e-13 | 1.00000  | 3.20324e-13 | 1.00000  |
| rad5                          | 2.01911e-13 | 1.00000  | 2.01911e-13 | 1.00000  |
| Phenyl+cycC3H4                | 1.77983e-13 | 1.00000  | 0.00000     | 1.00000  |
| rad22                         | 1.26020e-13 | 1.00000  | 1.26020e-13 | 1.00000  |
| rad45                         | 2.99449e-14 | 1.00000  | 2.99449e-14 | 1.00000  |
| rad67                         | 2.59818e-14 | 1.00000  | 2.59818e-14 | 1.00000  |
| PhcycC3H3_B+H                 | 1.30785e-14 | 1.00000  | 1.30785e-14 | 1.00000  |
| rad35                         | 1.15180e-14 | 1.00000  | 1.15180e-14 | 1.00000  |
| rad36                         | 3.19736e-15 | 1.00000  | 3.19736e-15 | 1.00000  |
| rad24                         | 3.03714e-15 | 1.00000  | 3.03714e-15 | 1.00000  |
| C2H2+PhCH2                    | 2.76364e-15 | 1.00000  | 2.76364e-15 | 1.00000  |
| rad10                         | 2.73698e-15 | 1.00000  | 2.73698e-15 | 1.00000  |
| rad3                          | 7.34372e-16 | 1.00000  | 7.34372e-16 | 1.00000  |
| rad4                          | 4.81413e-16 | 1.00000  | 4.81413e-16 | 1.00000  |
| PhCCCH3+H                     | 2.85604e-16 | 1.00000  | 2.85604e-16 | 1.00000  |
| Ph+MeAc                       | 2.19341e-16 | 1.00000  | 2.19341e-16 | 1.00000  |
| PhCCH+CH3                     | 9.91311e-17 | 1.00000  | 9.91311e-17 | 1.00000  |

|            |             |         |             |         |
|------------|-------------|---------|-------------|---------|
| rad25      | 8.44772e-17 | 1.00000 | 8.44772e-17 | 1.00000 |
| Ph+Allene  | 8.20459e-17 | 1.00000 | 8.20459e-17 | 1.00000 |
| rad23      | 6.07835e-17 | 1.00000 | 6.07835e-17 | 1.00000 |
| rad27      | 3.99439e-17 | 1.00000 | 3.99439e-17 | 1.00000 |
| rad13      | 2.71525e-17 | 1.00000 | 2.71525e-17 | 1.00000 |
| PhCH2CCH+H | 1.60216e-17 | 1.00000 | 1.60216e-17 | 1.00000 |
| rad30      | 4.43314e-18 | 1.00000 | 4.43314e-18 | 1.00000 |
| rad33      | 5.02494e-19 | 1.00000 | 5.02494e-19 | 1.00000 |
| rad37      | 7.97889e-20 | 1.00000 | 7.97889e-20 | 1.00000 |
| rad28      | 3.57926e-20 | 1.00000 | 3.57926e-20 | 1.00000 |
| rad60syn   | 1.77601e-20 | 1.00000 | 1.77601e-20 | 1.00000 |
| rad31      | 1.11076e-20 | 1.00000 | 1.11076e-20 | 1.00000 |
| rad60anti  | 8.68882e-21 | 1.00000 | 8.68882e-21 | 1.00000 |
| PAH3+H     | 8.01657e-21 | 1.00000 | 8.01657e-21 | 1.00000 |
| rad14      | 7.95222e-21 | 1.00000 | 7.95222e-21 | 1.00000 |
| PAH7+H     | 2.41897e-21 | 1.00000 | 2.41897e-21 | 1.00000 |
| rad59      | 1.60864e-21 | 1.00000 | 1.60864e-21 | 1.00000 |
| rad19syn   | 1.11509e-21 | 1.00000 | 1.11509e-21 | 1.00000 |
| rad38      | 3.78764e-22 | 1.00000 | 3.78764e-22 | 1.00000 |
| PAH10+CH3  | 2.11308e-22 | 1.00000 | 2.11308e-22 | 1.00000 |
| rad46      | 4.60118e-24 | 1.00000 | 4.60118e-24 | 1.00000 |
| rad43      | 1.82018e-24 | 1.00000 | 1.82018e-24 | 1.00000 |
| rad58      | 3.19026e-25 | 1.00000 | 3.19026e-25 | 1.00000 |
| rad70      | 2.03261e-25 | 1.00000 | 2.03261e-25 | 1.00000 |
| PAH9+H     | 1.40623e-25 | 1.00000 | 1.40623e-25 | 1.00000 |
| PAH1+H     | 4.95064e-26 | 1.00000 | 4.95064e-26 | 1.00000 |
| rad50      | 3.75508e-26 | 1.00000 | 3.75508e-26 | 1.00000 |
| rad39      | 7.05225e-27 | 1.00000 | 7.05225e-27 | 1.00000 |
| rad34      | 5.54616e-27 | 1.00000 | 5.54616e-27 | 1.00000 |
| rad54      | 3.87272e-27 | 1.00000 | 3.87272e-27 | 1.00000 |
| rad41      | 4.78615e-28 | 1.00000 | 4.78615e-28 | 1.00000 |
| rad52      | 3.05987e-28 | 1.00000 | 3.05987e-28 | 1.00000 |
| rad62      | 2.91653e-28 | 1.00000 | 2.91653e-28 | 1.00000 |
| rad51      | 1.25246e-28 | 1.00000 | 1.25246e-28 | 1.00000 |
| rad55      | 4.79726e-29 | 1.00000 | 4.79726e-29 | 1.00000 |
| rad47      | 1.86988e-29 | 1.00000 | 1.86988e-29 | 1.00000 |
| rad61      | 2.51680e-30 | 1.00000 | 2.51680e-30 | 1.00000 |
| rad42      | 2.79811e-31 | 1.00000 | 2.79811e-31 | 1.00000 |
| rad68syn   | 2.64728e-32 | 1.00000 | 2.64728e-32 | 1.00000 |
| rad68anti  | 1.97116e-32 | 1.00000 | 1.97116e-32 | 1.00000 |
| rad53      | 1.08890e-32 | 1.00000 | 1.08890e-32 | 1.00000 |
| rad65      | 3.58493e-33 | 1.00000 | 3.58493e-33 | 1.00000 |
| rad40syn   | 2.84255e-34 | 1.00000 | 2.84255e-34 | 1.00000 |
| rad40anti  | 2.09390e-34 | 1.00000 | 2.09390e-34 | 1.00000 |
| rad56      | 7.60551e-35 | 1.00000 | 7.60551e-35 | 1.00000 |
| PAH8+H     | 6.72048e-35 | 1.00000 | 6.72048e-35 | 1.00000 |
| rad64      | 3.46544e-36 | 1.00000 | 3.46544e-36 | 1.00000 |
| rad73      | 1.95969e-37 | 1.00000 | 1.95969e-37 | 1.00000 |
| rad71      | 2.14306e-39 | 1.00000 | 2.14306e-39 | 1.00000 |

10000000.0 Pa, 210.000000 K

=====

| Rate constant             | True (fraction)        | Effective (fraction)   |
|---------------------------|------------------------|------------------------|
| Total                     | 1.74272e-14 (1.00 )    | 1.74272e-14 (1.00 )    |
| Formation of rad19        | 1.74253e-14 (1.000 )   | 1.74253e-14 (1.000 )   |
| H-abstraction to cyc2enyl | 1.89310e-18 (0.000109) | 1.89310e-18 (0.000109) |
| H-abstraction to cyclenyl | 6.66714e-22 (3.83e-08) | 6.66714e-22 (3.83e-08) |

| species                       | PYtrue      | Cumul    | PYeffective | Cumul    |
|-------------------------------|-------------|----------|-------------|----------|
| rad19anti                     | 0.713376    | 0.713376 | 0.713376    | 0.713376 |
| rad9                          | 0.286442    | 0.999818 | 0.286442    | 0.999818 |
| Benzene+cycloprop-2-enylidene | 0.000108629 | 0.999927 | 0.000108629 | 0.999927 |
| rad15                         | 5.13295e-05 | 0.999978 | 5.13295e-05 | 0.999978 |
| rad8                          | 1.73809e-05 | 0.999996 | 1.73809e-05 | 0.999996 |
| rad12                         | 3.83771e-06 | 1.000000 | 3.83771e-06 | 1.000000 |
| Indene+H                      | 1.67542e-07 | 1.000000 | 1.67542e-07 | 1.000000 |
| Benzene+cycloprop-1-enylidene | 3.82571e-08 | 1.000000 | 3.82571e-08 | 1.000000 |
| PhCHCCH2+H                    | 7.76776e-10 | 1.000000 | 7.76776e-10 | 1.000000 |
| rad7                          | 2.61354e-10 | 1.000000 | 2.61354e-10 | 1.000000 |
| rad11                         | 4.05510e-11 | 1.000000 | 4.05510e-11 | 1.000000 |
| rad2                          | 3.02844e-11 | 1.000000 | 3.02844e-11 | 1.000000 |
| rad1                          | 4.19305e-12 | 1.000000 | 4.19305e-12 | 1.000000 |
| rad26                         | 2.94006e-12 | 1.000000 | 2.94006e-12 | 1.000000 |
| PhcycC3H3_A+H                 | 2.69193e-12 | 1.000000 | 2.69193e-12 | 1.000000 |
| rad21                         | 2.30650e-12 | 1.000000 | 2.30650e-12 | 1.000000 |
| rad6                          | 2.20100e-12 | 1.000000 | 2.20100e-12 | 1.000000 |
| rad18                         | 2.06622e-12 | 1.000000 | 2.06622e-12 | 1.000000 |
| rad20                         | 4.37113e-13 | 1.000000 | 4.37113e-13 | 1.000000 |

|                |             |          |             |          |
|----------------|-------------|----------|-------------|----------|
| Phenyl+cycC3H4 | 2.62903e-13 | 1.000000 | 0.00000     | 1.000000 |
| rad5           | 2.31234e-13 | 1.000000 | 2.31234e-13 | 1.000000 |
| rad22          | 1.75656e-13 | 1.000000 | 1.75656e-13 | 1.000000 |
| rad45          | 4.26772e-14 | 1.000000 | 4.26772e-14 | 1.000000 |
| rad67          | 3.67231e-14 | 1.000000 | 3.67231e-14 | 1.000000 |
| PhcycC3H3_B+H  | 2.64508e-14 | 1.000000 | 2.64508e-14 | 1.000000 |
| rad35          | 1.61958e-14 | 1.000000 | 1.61958e-14 | 1.000000 |
| rad36          | 4.52264e-15 | 1.000000 | 4.52264e-15 | 1.000000 |
| C2H2+PhCH2     | 4.29933e-15 | 1.000000 | 4.29933e-15 | 1.000000 |
| rad10          | 3.92018e-15 | 1.000000 | 3.92018e-15 | 1.000000 |
| rad24          | 3.79573e-15 | 1.000000 | 3.79573e-15 | 1.000000 |
| rad3           | 1.06298e-15 | 1.000000 | 1.06298e-15 | 1.000000 |
| rad4           | 6.95356e-16 | 1.000000 | 6.95356e-16 | 1.000000 |
| PhCCCH3+H      | 4.32930e-16 | 1.000000 | 4.32930e-16 | 1.000000 |
| Ph+MeAc        | 3.40756e-16 | 1.000000 | 3.40756e-16 | 1.000000 |
| PhCCH+CH3      | 1.30315e-16 | 1.000000 | 1.30315e-16 | 1.000000 |
| Ph+Allene      | 1.27216e-16 | 1.000000 | 1.27216e-16 | 1.000000 |
| rad25          | 1.22779e-16 | 1.000000 | 1.22779e-16 | 1.000000 |
| rad23          | 9.63443e-17 | 1.000000 | 9.63443e-17 | 1.000000 |
| rad27          | 5.86136e-17 | 1.000000 | 5.86136e-17 | 1.000000 |
| rad13          | 3.69323e-17 | 1.000000 | 3.69323e-17 | 1.000000 |
| PhCH2CCH+H     | 2.57949e-17 | 1.000000 | 2.57949e-17 | 1.000000 |
| rad30          | 6.95131e-18 | 1.000000 | 6.95131e-18 | 1.000000 |
| rad33          | 6.77351e-19 | 1.000000 | 6.77351e-19 | 1.000000 |
| rad37          | 1.31269e-19 | 1.000000 | 1.31269e-19 | 1.000000 |
| rad28          | 5.92817e-20 | 1.000000 | 5.92817e-20 | 1.000000 |
| rad60syn       | 2.95920e-20 | 1.000000 | 2.95920e-20 | 1.000000 |
| rad60anti      | 1.45560e-20 | 1.000000 | 1.45560e-20 | 1.000000 |
| PAH3+H         | 1.44013e-20 | 1.000000 | 1.44013e-20 | 1.000000 |
| rad14          | 1.38997e-20 | 1.000000 | 1.38997e-20 | 1.000000 |
| rad31          | 1.38759e-20 | 1.000000 | 1.38759e-20 | 1.000000 |
| PAH7+H         | 4.36946e-21 | 1.000000 | 4.36946e-21 | 1.000000 |
| rad59          | 2.85608e-21 | 1.000000 | 2.85608e-21 | 1.000000 |
| rad19syn       | 1.77054e-21 | 1.000000 | 1.77054e-21 | 1.000000 |
| rad38          | 6.88230e-22 | 1.000000 | 6.88230e-22 | 1.000000 |
| PAH10+CH3      | 4.20317e-22 | 1.000000 | 4.20317e-22 | 1.000000 |
| rad46          | 8.67259e-24 | 1.000000 | 8.67259e-24 | 1.000000 |
| rad43          | 4.01638e-24 | 1.000000 | 4.01638e-24 | 1.000000 |
| rad58          | 7.17717e-25 | 1.000000 | 7.17717e-25 | 1.000000 |
| rad70          | 4.78683e-25 | 1.000000 | 4.78683e-25 | 1.000000 |
| PAH9+H         | 2.91733e-25 | 1.000000 | 2.91733e-25 | 1.000000 |
| PAH1+H         | 1.18614e-25 | 1.000000 | 1.18614e-25 | 1.000000 |
| rad50          | 8.05152e-26 | 1.000000 | 8.05152e-26 | 1.000000 |
| rad39          | 1.59109e-26 | 1.000000 | 1.59109e-26 | 1.000000 |
| rad34          | 1.45507e-26 | 1.000000 | 1.45507e-26 | 1.000000 |
| rad54          | 7.66830e-27 | 1.000000 | 7.66830e-27 | 1.000000 |
| rad41          | 1.40464e-27 | 1.000000 | 1.40464e-27 | 1.000000 |
| rad62          | 8.39925e-28 | 1.000000 | 8.39925e-28 | 1.000000 |
| rad52          | 7.21381e-28 | 1.000000 | 7.21381e-28 | 1.000000 |
| rad51          | 3.23193e-28 | 1.000000 | 3.23193e-28 | 1.000000 |
| rad55          | 1.02896e-28 | 1.000000 | 1.02896e-28 | 1.000000 |
| rad47          | 5.17417e-29 | 1.000000 | 5.17417e-29 | 1.000000 |
| rad61          | 1.04941e-29 | 1.000000 | 1.04941e-29 | 1.000000 |
| rad42          | 1.02828e-30 | 1.000000 | 1.02828e-30 | 1.000000 |
| rad68syn       | 1.32485e-31 | 1.000000 | 1.32485e-31 | 1.000000 |
| rad68anti      | 9.78868e-32 | 1.000000 | 9.78868e-32 | 1.000000 |
| rad53          | 3.34955e-32 | 1.000000 | 3.34955e-32 | 1.000000 |
| rad65          | 1.11897e-32 | 1.000000 | 1.11897e-32 | 1.000000 |
| rad40syn       | 1.84584e-33 | 1.000000 | 1.84584e-33 | 1.000000 |
| rad40anti      | 1.35881e-33 | 1.000000 | 1.35881e-33 | 1.000000 |
| PAH8+H         | 4.96193e-34 | 1.000000 | 4.96193e-34 | 1.000000 |
| rad56          | 3.25408e-34 | 1.000000 | 3.25408e-34 | 1.000000 |
| rad64          | 1.65347e-35 | 1.000000 | 1.65347e-35 | 1.000000 |
| rad73          | 1.40936e-36 | 1.000000 | 1.40936e-36 | 1.000000 |
| rad71          | 1.81827e-38 | 1.000000 | 1.81827e-38 | 1.000000 |

10000000.0 Pa, 220.000000 K

| Rate constant                 | True (fraction)        | Effective (fraction)   |             |          |
|-------------------------------|------------------------|------------------------|-------------|----------|
| Total                         | 1.97009e-14 (1.00 )    | 1.97009e-14 (1.00 )    |             |          |
| Formation of rad19            | 1.96977e-14 (1.000 )   | 1.96977e-14 (1.000 )   |             |          |
| H-abstraction to cyc2enyl     | 3.19064e-18 (0.000162) | 3.19064e-18 (0.000162) |             |          |
| H-abstraction to cyclenyl     | 1.64627e-21 (8.36e-08) | 1.64627e-21 (8.36e-08) |             |          |
| species                       | PYtrue                 | Cumul                  | PYeffective | Cumul    |
| rad19anti                     | 0.697882               | 0.697882               | 0.697882    | 0.697882 |
| rad9                          | 0.301879               | 0.999761               | 0.301879    | 0.999761 |
| Benzene+cycloprop-2-enylidene | 0.000161954            | 0.999923               | 0.000161954 | 0.999923 |

|                               |             |          |             |          |
|-------------------------------|-------------|----------|-------------|----------|
| rad15                         | 5.86248e-05 | 0.999982 | 5.86248e-05 | 0.999982 |
| rad8                          | 1.41342e-05 | 0.999996 | 1.41342e-05 | 0.999996 |
| rad12                         | 3.91219e-06 | 1.000000 | 3.91219e-06 | 1.000000 |
| Indene+H                      | 2.09352e-07 | 1.000000 | 2.09352e-07 | 1.000000 |
| Benzene+cycloprop-1-enylidene | 8.35632e-08 | 1.000000 | 8.35632e-08 | 1.000000 |
| PhCHCH2+H                     | 9.74495e-10 | 1.000000 | 9.74495e-10 | 1.000000 |
| rad7                          | 2.92606e-10 | 1.000000 | 2.92606e-10 | 1.000000 |
| rad11                         | 5.12241e-11 | 1.000000 | 5.12241e-11 | 1.000000 |
| rad2                          | 3.83977e-11 | 1.000000 | 3.83977e-11 | 1.000000 |
| rad1                          | 5.28692e-12 | 1.000000 | 5.28692e-12 | 1.000000 |
| PhcycC3H3_A+H                 | 4.20856e-12 | 1.000000 | 4.20856e-12 | 1.000000 |
| rad26                         | 3.81884e-12 | 1.000000 | 3.81884e-12 | 1.000000 |
| rad21                         | 2.95902e-12 | 1.000000 | 2.95902e-12 | 1.000000 |
| rad18                         | 2.76030e-12 | 1.000000 | 2.76030e-12 | 1.000000 |
| rad6                          | 2.72093e-12 | 1.000000 | 2.72093e-12 | 1.000000 |
| rad20                         | 6.02536e-13 | 1.000000 | 6.02536e-13 | 1.000000 |
| Phenyl+cycC3H4                | 3.87552e-13 | 1.000000 | 0.00000     | 1.000000 |
| rad5                          | 2.66189e-13 | 1.000000 | 2.66189e-13 | 1.000000 |
| rad22                         | 2.47210e-13 | 1.000000 | 2.47210e-13 | 1.000000 |
| rad45                         | 6.14094e-14 | 1.000000 | 6.14094e-14 | 1.000000 |
| PhcycC3H3_B+H                 | 5.32033e-14 | 1.000000 | 5.32033e-14 | 1.000000 |
| rad67                         | 5.24816e-14 | 1.000000 | 5.24816e-14 | 1.000000 |
| rad35                         | 2.30180e-14 | 1.000000 | 2.30180e-14 | 1.000000 |
| C2H2+PhCH2                    | 6.83251e-15 | 1.000000 | 6.83251e-15 | 1.000000 |
| rad36                         | 6.46386e-15 | 1.000000 | 6.46386e-15 | 1.000000 |
| rad10                         | 5.68750e-15 | 1.000000 | 5.68750e-15 | 1.000000 |
| rad24                         | 4.77717e-15 | 1.000000 | 4.77717e-15 | 1.000000 |
| rad3                          | 1.55964e-15 | 1.000000 | 1.55964e-15 | 1.000000 |
| rad4                          | 1.01835e-15 | 1.000000 | 1.01835e-15 | 1.000000 |
| PhCCCH3+H                     | 6.68527e-16 | 1.000000 | 6.68527e-16 | 1.000000 |
| Ph+MeAc                       | 5.40635e-16 | 1.000000 | 5.40635e-16 | 1.000000 |
| Ph+Allene                     | 2.01179e-16 | 1.000000 | 2.01179e-16 | 1.000000 |
| rad25                         | 1.80911e-16 | 1.000000 | 1.80911e-16 | 1.000000 |
| PhCCH+CH3                     | 1.73244e-16 | 1.000000 | 1.73244e-16 | 1.000000 |
| rad23                         | 1.54983e-16 | 1.000000 | 1.54983e-16 | 1.000000 |
| rad27                         | 8.72637e-17 | 1.000000 | 8.72637e-17 | 1.000000 |
| rad13                         | 5.06886e-17 | 1.000000 | 5.06886e-17 | 1.000000 |
| PhCH2CCH+H                    | 4.24849e-17 | 1.000000 | 4.24849e-17 | 1.000000 |
| rad30                         | 1.10762e-17 | 1.000000 | 1.10762e-17 | 1.000000 |
| rad33                         | 9.19833e-19 | 1.000000 | 9.19833e-19 | 1.000000 |
| rad37                         | 2.20401e-19 | 1.000000 | 2.20401e-19 | 1.000000 |
| rad28                         | 1.00271e-19 | 1.000000 | 1.00271e-19 | 1.000000 |
| rad60syn                      | 5.03816e-20 | 1.000000 | 5.03816e-20 | 1.000000 |
| PAH3+H                        | 2.65974e-20 | 1.000000 | 2.65974e-20 | 1.000000 |
| rad60anti                     | 2.49280e-20 | 1.000000 | 2.49280e-20 | 1.000000 |
| rad14                         | 2.49248e-20 | 1.000000 | 2.49248e-20 | 1.000000 |
| rad31                         | 1.76067e-20 | 1.000000 | 1.76067e-20 | 1.000000 |
| PAH7+H                        | 8.12381e-21 | 1.000000 | 8.12381e-21 | 1.000000 |
| rad59                         | 5.20721e-21 | 1.000000 | 5.20721e-21 | 1.000000 |
| rad19syn                      | 3.07022e-21 | 1.000000 | 3.07022e-21 | 1.000000 |
| rad38                         | 1.28421e-21 | 1.000000 | 1.28421e-21 | 1.000000 |
| PAH10+CH3                     | 8.62344e-22 | 1.000000 | 8.62344e-22 | 1.000000 |
| rad46                         | 1.68184e-23 | 1.000000 | 1.68184e-23 | 1.000000 |
| rad43                         | 9.20091e-24 | 1.000000 | 9.20091e-24 | 1.000000 |
| rad58                         | 1.67137e-24 | 1.000000 | 1.67137e-24 | 1.000000 |
| rad70                         | 1.17007e-24 | 1.000000 | 1.17007e-24 | 1.000000 |
| PAH9+H                        | 6.28208e-25 | 1.000000 | 6.28208e-25 | 1.000000 |
| PAH1+H                        | 2.93065e-25 | 1.000000 | 2.93065e-25 | 1.000000 |
| rad50                         | 1.79152e-25 | 1.000000 | 1.79152e-25 | 1.000000 |
| rad34                         | 3.95174e-26 | 1.000000 | 3.95174e-26 | 1.000000 |
| rad39                         | 3.74528e-26 | 1.000000 | 3.74528e-26 | 1.000000 |
| rad54                         | 1.54806e-26 | 1.000000 | 1.54806e-26 | 1.000000 |
| rad41                         | 4.24513e-27 | 1.000000 | 4.24513e-27 | 1.000000 |
| rad62                         | 2.52989e-27 | 1.000000 | 2.52989e-27 | 1.000000 |
| rad52                         | 1.76906e-27 | 1.000000 | 1.76906e-27 | 1.000000 |
| rad51                         | 8.68048e-28 | 1.000000 | 8.68048e-28 | 1.000000 |
| rad55                         | 2.24654e-28 | 1.000000 | 2.24654e-28 | 1.000000 |
| rad47                         | 1.45287e-28 | 1.000000 | 1.45287e-28 | 1.000000 |
| rad61                         | 4.26193e-29 | 1.000000 | 4.26193e-29 | 1.000000 |
| rad42                         | 3.88049e-30 | 1.000000 | 3.88049e-30 | 1.000000 |
| rad68syn                      | 6.31543e-31 | 1.000000 | 6.31543e-31 | 1.000000 |
| rad68anti                     | 4.63610e-31 | 1.000000 | 4.63610e-31 | 1.000000 |
| rad53                         | 1.02401e-31 | 1.000000 | 1.02401e-31 | 1.000000 |
| rad65                         | 3.65267e-32 | 1.000000 | 3.65267e-32 | 1.000000 |
| rad40syn                      | 1.08427e-32 | 1.000000 | 1.08427e-32 | 1.000000 |
| rad40anti                     | 7.98521e-33 | 1.000000 | 7.98521e-33 | 1.000000 |
| PAH8+H                        | 3.21943e-33 | 1.000000 | 3.21943e-33 | 1.000000 |
| rad56                         | 1.32681e-33 | 1.000000 | 1.32681e-33 | 1.000000 |
| rad64                         | 7.72107e-35 | 1.000000 | 7.72107e-35 | 1.000000 |
| rad73                         | 9.11305e-36 | 1.000000 | 9.11305e-36 | 1.000000 |

rad71 | 1.33749e-37 1.000000 | 1.33749e-37 1.000000

10000000.0 Pa, 230.000000 K

=====

| Rate constant             | True (fraction)        | Effective (fraction)   |
|---------------------------|------------------------|------------------------|
| Total                     | 2.20761e-14 (1.00 )    | 2.20761e-14 (1.00 )    |
| Formation of rad19        | 2.20710e-14 (1.000 )   | 2.20710e-14 (1.000 )   |
| H-abstraction to cyc2enyl | 5.13155e-18 (0.000232) | 5.13155e-18 (0.000232) |
| H-abstraction to cyc1enyl | 3.75316e-21 (1.70e-07) | 3.75316e-21 (1.70e-07) |

| species                       | PYtrue      | Cumul    | PYeffective | Cumul    |
|-------------------------------|-------------|----------|-------------|----------|
| rad19anti                     | 0.681902    | 0.681902 | 0.681902    | 0.681902 |
| rad9                          | 0.317782    | 0.999684 | 0.317782    | 0.999684 |
| Benzene+cycloprop-2-enylidene | 0.000232448 | 0.999917 | 0.000232448 | 0.999917 |
| rad15                         | 6.69418e-05 | 0.999984 | 6.69418e-05 | 0.999984 |
| rad8                          | 1.15095e-05 | 0.999995 | 1.15095e-05 | 0.999995 |
| rad12                         | 3.98782e-06 | 0.999999 | 3.98782e-06 | 0.999999 |
| Indene+H                      | 2.62119e-07 | 1.000000 | 2.62119e-07 | 1.000000 |
| Benzene+cycloprop-1-enylidene | 1.70010e-07 | 1.000000 | 1.70010e-07 | 1.000000 |
| PhCHCCH2+H                    | 1.23142e-09 | 1.000000 | 1.23142e-09 | 1.000000 |
| rad7                          | 3.29100e-10 | 1.000000 | 3.29100e-10 | 1.000000 |
| rad11                         | 6.52008e-11 | 1.000000 | 6.52008e-11 | 1.000000 |
| rad2                          | 4.90715e-11 | 1.000000 | 4.90715e-11 | 1.000000 |
| rad1                          | 6.72557e-12 | 1.000000 | 6.72557e-12 | 1.000000 |
| PhcycC3H3_A+H                 | 6.65591e-12 | 1.000000 | 6.65591e-12 | 1.000000 |
| rad26                         | 4.99345e-12 | 1.000000 | 4.99345e-12 | 1.000000 |
| rad21                         | 3.82804e-12 | 1.000000 | 3.82804e-12 | 1.000000 |
| rad18                         | 3.71513e-12 | 1.000000 | 3.71513e-12 | 1.000000 |
| rad6                          | 3.38806e-12 | 1.000000 | 3.38806e-12 | 1.000000 |
| rad20                         | 8.40092e-13 | 1.000000 | 8.40092e-13 | 1.000000 |
| Phenyl+cycC3H4                | 5.69916e-13 | 1.000000 | 0.000000    | 1.000000 |
| rad22                         | 3.51933e-13 | 1.000000 | 3.51933e-13 | 1.000000 |
| rad5                          | 3.08260e-13 | 1.000000 | 3.08260e-13 | 1.000000 |
| PhcycC3H3_B+H                 | 1.06774e-13 | 1.000000 | 1.06774e-13 | 1.000000 |
| rad45                         | 8.94013e-14 | 1.000000 | 8.94013e-14 | 1.000000 |
| rad67                         | 7.59964e-14 | 1.000000 | 7.59964e-14 | 1.000000 |
| rad35                         | 3.31344e-14 | 1.000000 | 3.31344e-14 | 1.000000 |
| C2H2+PhCH2                    | 1.11179e-14 | 1.000000 | 1.11179e-14 | 1.000000 |
| rad36                         | 9.35390e-15 | 1.000000 | 9.35390e-15 | 1.000000 |
| rad10                         | 8.37842e-15 | 1.000000 | 8.37842e-15 | 1.000000 |
| rad24                         | 6.06200e-15 | 1.000000 | 6.06200e-15 | 1.000000 |
| rad3                          | 2.32528e-15 | 1.000000 | 2.32528e-15 | 1.000000 |
| rad4                          | 1.51585e-15 | 1.000000 | 1.51585e-15 | 1.000000 |
| PhCCCH3+H                     | 1.05464e-15 | 1.000000 | 1.05464e-15 | 1.000000 |
| Ph+MeAc                       | 8.78590e-16 | 1.000000 | 8.78590e-16 | 1.000000 |
| Ph+Allene                     | 3.25426e-16 | 1.000000 | 3.25426e-16 | 1.000000 |
| rad25                         | 2.70874e-16 | 1.000000 | 2.70874e-16 | 1.000000 |
| rad23                         | 2.53792e-16 | 1.000000 | 2.53792e-16 | 1.000000 |
| PhCCH+CH3                     | 2.33480e-16 | 1.000000 | 2.33480e-16 | 1.000000 |
| rad27                         | 1.32124e-16 | 1.000000 | 1.32124e-16 | 1.000000 |
| PhCH2CCH+H                    | 7.18019e-17 | 1.000000 | 7.18019e-17 | 1.000000 |
| rad13                         | 7.02605e-17 | 1.000000 | 7.02605e-17 | 1.000000 |
| rad30                         | 1.79919e-17 | 1.000000 | 1.79919e-17 | 1.000000 |
| rad33                         | 1.25889e-18 | 1.000000 | 1.25889e-18 | 1.000000 |
| rad37                         | 3.78862e-19 | 1.000000 | 3.78862e-19 | 1.000000 |
| rad28                         | 1.73750e-19 | 1.000000 | 1.73750e-19 | 1.000000 |
| rad60syn                      | 8.79634e-20 | 1.000000 | 8.79634e-20 | 1.000000 |
| PAH3+H                        | 5.06865e-20 | 1.000000 | 5.06865e-20 | 1.000000 |
| rad14                         | 4.60249e-20 | 1.000000 | 4.60249e-20 | 1.000000 |
| rad60anti                     | 4.37995e-20 | 1.000000 | 4.37995e-20 | 1.000000 |
| rad31                         | 2.27250e-20 | 1.000000 | 2.27250e-20 | 1.000000 |
| PAH7+H                        | 1.56017e-20 | 1.000000 | 1.56017e-20 | 1.000000 |
| rad59                         | 9.78467e-21 | 1.000000 | 9.78467e-21 | 1.000000 |
| rad19syn                      | 5.78657e-21 | 1.000000 | 5.78657e-21 | 1.000000 |
| rad38                         | 2.46871e-21 | 1.000000 | 2.46871e-21 | 1.000000 |
| PAH10+CH3                     | 1.82905e-21 | 1.000000 | 1.82905e-21 | 1.000000 |
| rad46                         | 3.36851e-23 | 1.000000 | 3.36851e-23 | 1.000000 |
| rad43                         | 2.19085e-23 | 1.000000 | 2.19085e-23 | 1.000000 |
| rad58                         | 4.03210e-24 | 1.000000 | 4.03210e-24 | 1.000000 |
| rad70                         | 2.96712e-24 | 1.000000 | 2.96712e-24 | 1.000000 |
| PAH9+H                        | 1.40998e-24 | 1.000000 | 1.40998e-24 | 1.000000 |
| PAH1+H                        | 7.46315e-25 | 1.000000 | 7.46315e-25 | 1.000000 |
| rad50                         | 4.14694e-25 | 1.000000 | 4.14694e-25 | 1.000000 |
| rad34                         | 1.10741e-25 | 1.000000 | 1.10741e-25 | 1.000000 |
| rad39                         | 9.21011e-26 | 1.000000 | 9.21011e-26 | 1.000000 |
| rad54                         | 3.18704e-26 | 1.000000 | 3.18704e-26 | 1.000000 |
| rad41                         | 1.31348e-26 | 1.000000 | 1.31348e-26 | 1.000000 |
| rad62                         | 7.91887e-27 | 1.000000 | 7.91887e-27 | 1.000000 |

|           |             |          |             |          |
|-----------|-------------|----------|-------------|----------|
| rad52     | 4.51482e-27 | 1.000000 | 4.51482e-27 | 1.000000 |
| rad51     | 2.42130e-27 | 1.000000 | 2.42130e-27 | 1.000000 |
| rad55     | 4.99312e-28 | 1.000000 | 4.99312e-28 | 1.000000 |
| rad47     | 4.12456e-28 | 1.000000 | 4.12456e-28 | 1.000000 |
| rad61     | 1.67367e-28 | 1.000000 | 1.67367e-28 | 1.000000 |
| rad42     | 1.48132e-29 | 1.000000 | 1.48132e-29 | 1.000000 |
| rad68syn  | 2.84186e-30 | 1.000000 | 2.84186e-30 | 1.000000 |
| rad68anti | 2.07546e-30 | 1.000000 | 2.07546e-30 | 1.000000 |
| rad53     | 3.11170e-31 | 1.000000 | 3.11170e-31 | 1.000000 |
| rad65     | 1.23262e-31 | 1.000000 | 1.23262e-31 | 1.000000 |
| rad40syn  | 5.75120e-32 | 1.000000 | 5.75120e-32 | 1.000000 |
| rad40anti | 4.24103e-32 | 1.000000 | 4.24103e-32 | 1.000000 |
| PAH8+H    | 1.84309e-32 | 1.000000 | 1.84309e-32 | 1.000000 |
| rad56     | 5.15893e-33 | 1.000000 | 5.15893e-33 | 1.000000 |
| rad64     | 3.46395e-34 | 1.000000 | 3.46395e-34 | 1.000000 |
| rad73     | 5.28831e-35 | 1.000000 | 5.28831e-35 | 1.000000 |
| rad71     | 8.58876e-37 | 1.000000 | 8.58876e-37 | 1.000000 |

10000000.0 Pa, 240.000000 K

| Rate constant             | True (fraction)        | Effective (fraction)   |
|---------------------------|------------------------|------------------------|
| Total                     | 2.45462e-14 (1.00 )    | 2.45462e-14 (1.00 )    |
| Formation of rad19        | 2.45383e-14 (1.000 )   | 2.45383e-14 (1.000 )   |
| H-abstraction to cyc2enyl | 7.92234e-18 (0.000323) | 7.92234e-18 (0.000323) |
| H-abstraction to cyclenyl | 7.97958e-21 (3.25e-07) | 7.97958e-21 (3.25e-07) |

| species                       | PYtrue      | Cumul    | PYeffective | Cumul    |
|-------------------------------|-------------|----------|-------------|----------|
| rad19anti                     | 0.665396    | 0.665396 | 0.665396    | 0.665396 |
| rad9                          | 0.334191    | 0.999587 | 0.334191    | 0.999587 |
| Benzene+cycloprop-2-enylidene | 0.000322752 | 0.999910 | 0.000322752 | 0.999910 |
| rad15                         | 7.64640e-05 | 0.999986 | 7.64640e-05 | 0.999986 |
| rad8                          | 9.38336e-06 | 0.999996 | 9.38336e-06 | 0.999996 |
| rad12                         | 4.06536e-06 | 1.000000 | 4.06536e-06 | 1.000000 |
| Indene+H                      | 3.29225e-07 | 1.000000 | 3.29225e-07 | 1.000000 |
| Benzene+cycloprop-1-enylidene | 3.25084e-07 | 1.000000 | 3.25084e-07 | 1.000000 |
| PhCHCCH2+H                    | 1.56938e-09 | 1.000000 | 1.56938e-09 | 1.000000 |
| rad7                          | 3.71794e-10 | 1.000000 | 3.71794e-10 | 1.000000 |
| rad11                         | 8.37327e-11 | 1.000000 | 8.37327e-11 | 1.000000 |
| rad2                          | 6.32931e-11 | 1.000000 | 6.32931e-11 | 1.000000 |
| PhcycC3H3_A+H                 | 1.06558e-11 | 1.000000 | 1.06558e-11 | 1.000000 |
| rad1                          | 8.64344e-12 | 1.000000 | 8.64344e-12 | 1.000000 |
| rad26                         | 6.58238e-12 | 1.000000 | 6.58238e-12 | 1.000000 |
| rad18                         | 5.04587e-12 | 1.000000 | 5.04587e-12 | 1.000000 |
| rad21                         | 4.99956e-12 | 1.000000 | 4.99956e-12 | 1.000000 |
| rad6                          | 4.25150e-12 | 1.000000 | 4.25150e-12 | 1.000000 |
| rad20                         | 1.18632e-12 | 1.000000 | 1.18632e-12 | 1.000000 |
| Phenyl+cycC3H4                | 8.35731e-13 | 1.000000 | 0.000000    | 1.000000 |
| rad22                         | 5.07781e-13 | 1.000000 | 5.07781e-13 | 1.000000 |
| rad5                          | 3.59460e-13 | 1.000000 | 3.59460e-13 | 1.000000 |
| PhcycC3H3_B+H                 | 2.14291e-13 | 1.000000 | 2.14291e-13 | 1.000000 |
| rad45                         | 1.31958e-13 | 1.000000 | 1.31958e-13 | 1.000000 |
| rad67                         | 1.11752e-13 | 1.000000 | 1.11752e-13 | 1.000000 |
| rad35                         | 4.84160e-14 | 1.000000 | 4.84160e-14 | 1.000000 |
| C2H2+PhCH2                    | 1.85659e-14 | 1.000000 | 1.85659e-14 | 1.000000 |
| rad36                         | 1.37346e-14 | 1.000000 | 1.37346e-14 | 1.000000 |
| rad10                         | 1.25638e-14 | 1.000000 | 1.25638e-14 | 1.000000 |
| rad24                         | 7.76521e-15 | 1.000000 | 7.76521e-15 | 1.000000 |
| rad3                          | 3.53176e-15 | 1.000000 | 3.53176e-15 | 1.000000 |
| rad4                          | 2.29929e-15 | 1.000000 | 2.29929e-15 | 1.000000 |
| PhCCCH3+H                     | 1.70471e-15 | 1.000000 | 1.70471e-15 | 1.000000 |
| Ph+MeAc                       | 1.46679e-15 | 1.000000 | 1.46679e-15 | 1.000000 |
| Ph+Allene                     | 5.40017e-16 | 1.000000 | 5.40017e-16 | 1.000000 |
| rad23                         | 4.24362e-16 | 1.000000 | 4.24362e-16 | 1.000000 |
| rad25                         | 4.13105e-16 | 1.000000 | 4.13105e-16 | 1.000000 |
| PhCCH+CH3                     | 3.20078e-16 | 1.000000 | 3.20078e-16 | 1.000000 |
| rad27                         | 2.03932e-16 | 1.000000 | 2.03932e-16 | 1.000000 |
| PhCH2CCH+H                    | 1.24878e-16 | 1.000000 | 1.24878e-16 | 1.000000 |
| rad13                         | 9.84688e-17 | 1.000000 | 9.84688e-17 | 1.000000 |
| rad30                         | 2.98911e-17 | 1.000000 | 2.98911e-17 | 1.000000 |
| rad33                         | 1.73718e-18 | 1.000000 | 1.73718e-18 | 1.000000 |
| rad37                         | 6.68716e-19 | 1.000000 | 6.68716e-19 | 1.000000 |
| rad28                         | 3.09338e-19 | 1.000000 | 3.09338e-19 | 1.000000 |
| rad60syn                      | 1.58026e-19 | 1.000000 | 1.58026e-19 | 1.000000 |
| PAH3+H                        | 9.99428e-20 | 1.000000 | 9.99428e-20 | 1.000000 |
| rad14                         | 8.77947e-20 | 1.000000 | 8.77947e-20 | 1.000000 |
| rad60anti                     | 7.92214e-20 | 1.000000 | 7.92214e-20 | 1.000000 |
| PAH7+H                        | 3.10258e-20 | 1.000000 | 3.10258e-20 | 1.000000 |
| rad31                         | 2.98835e-20 | 1.000000 | 2.98835e-20 | 1.000000 |



|           |             |         |             |         |
|-----------|-------------|---------|-------------|---------|
| rad59     | 1.90035e-20 | 1.00000 | 1.90035e-20 | 1.00000 |
| rad19syn  | 1.17987e-20 | 1.00000 | 1.17987e-20 | 1.00000 |
| rad38     | 4.89989e-21 | 1.00000 | 4.89989e-21 | 1.00000 |
| PAH10+CH3 | 4.01092e-21 | 1.00000 | 4.01092e-21 | 1.00000 |
| rad46     | 6.98571e-23 | 1.00000 | 6.98571e-23 | 1.00000 |
| rad43     | 5.40703e-23 | 1.00000 | 5.40703e-23 | 1.00000 |
| rad58     | 1.00442e-23 | 1.00000 | 1.00442e-23 | 1.00000 |
| rad70     | 7.76273e-24 | 1.00000 | 7.76273e-24 | 1.00000 |
| PAH9+H    | 3.30160e-24 | 1.00000 | 3.30160e-24 | 1.00000 |
| PAH1+H    | 1.94884e-24 | 1.00000 | 1.94884e-24 | 1.00000 |
| rad50     | 9.97526e-25 | 1.00000 | 9.97526e-25 | 1.00000 |
| rad34     | 3.17244e-25 | 1.00000 | 3.17244e-25 | 1.00000 |
| rad39     | 2.35640e-25 | 1.00000 | 2.35640e-25 | 1.00000 |
| rad54     | 6.69501e-26 | 1.00000 | 6.69501e-26 | 1.00000 |
| rad41     | 4.11019e-26 | 1.00000 | 4.11019e-26 | 1.00000 |
| rad62     | 2.53965e-26 | 1.00000 | 2.53965e-26 | 1.00000 |
| rad52     | 1.19356e-26 | 1.00000 | 1.19356e-26 | 1.00000 |
| rad51     | 6.95462e-27 | 1.00000 | 6.95462e-27 | 1.00000 |
| rad47     | 1.17539e-27 | 1.00000 | 1.17539e-27 | 1.00000 |
| rad55     | 1.12982e-27 | 1.00000 | 1.12982e-27 | 1.00000 |
| rad61     | 6.28689e-28 | 1.00000 | 6.28689e-28 | 1.00000 |
| rad42     | 5.60529e-29 | 1.00000 | 5.60529e-29 | 1.00000 |
| rad68syn  | 1.19513e-29 | 1.00000 | 1.19513e-29 | 1.00000 |
| rad68anti | 8.69356e-30 | 1.00000 | 8.69356e-30 | 1.00000 |
| rad53     | 9.37279e-31 | 1.00000 | 9.37279e-31 | 1.00000 |
| rad65     | 4.21688e-31 | 1.00000 | 4.21688e-31 | 1.00000 |
| rad40syn  | 2.75092e-31 | 1.00000 | 2.75092e-31 | 1.00000 |
| rad40anti | 2.03270e-31 | 1.00000 | 2.03270e-31 | 1.00000 |
| PAH8+H    | 9.34690e-32 | 1.00000 | 9.34690e-32 | 1.00000 |
| rad56     | 1.90818e-32 | 1.00000 | 1.90818e-32 | 1.00000 |
| rad64     | 1.46728e-33 | 1.00000 | 1.46728e-33 | 1.00000 |
| rad73     | 2.75256e-34 | 1.00000 | 2.75256e-34 | 1.00000 |
| rad71     | 4.84579e-36 | 1.00000 | 4.84579e-36 | 1.00000 |

10000000.0 Pa, 250.000000 K

=====

| Rate constant             | True (fraction)        | Effective (fraction)   |
|---------------------------|------------------------|------------------------|
| Total                     | 2.71048e-14 (1.00 )    | 2.71048e-14 (1.00 )    |
| Formation of rad19        | 2.70930e-14 (1.000 )   | 2.70930e-14 (1.000 )   |
| H-abstraction to cyc2enyl | 1.17991e-17 (0.000435) | 1.17991e-17 (0.000435) |
| H-abstraction to cyclenyl | 1.59554e-20 (5.89e-07) | 1.59554e-20 (5.89e-07) |

| species                       | PYtrue      | Cumul    | PYeffective | Cumul    |
|-------------------------------|-------------|----------|-------------|----------|
| rad19anti                     | 0.648323    | 0.648323 | 0.648323    | 0.648323 |
| rad9                          | 0.351142    | 0.999465 | 0.351142    | 0.999465 |
| Benzene+cycloprop-2-enylidene | 0.000435312 | 0.999900 | 0.000435312 | 0.999900 |
| rad15                         | 8.74138e-05 | 0.999988 | 8.74138e-05 | 0.999988 |
| rad8                          | 7.65811e-06 | 0.999996 | 7.65811e-06 | 0.999996 |
| rad12                         | 4.14536e-06 | 1.000000 | 4.14536e-06 | 1.000000 |
| Benzene+cycloprop-1-enylidene | 5.88656e-07 | 1.000000 | 5.88656e-07 | 1.000000 |
| Indene+H                      | 4.15291e-07 | 1.000000 | 4.15291e-07 | 1.000000 |
| PhCHCCH2+H                    | 2.01980e-09 | 1.000000 | 2.01980e-09 | 1.000000 |
| rad7                          | 4.21812e-10 | 1.000000 | 4.21812e-10 | 1.000000 |
| rad11                         | 1.08635e-10 | 1.000000 | 1.08635e-10 | 1.000000 |
| rad2                          | 8.25028e-11 | 1.000000 | 8.25028e-11 | 1.000000 |
| PhcycC3H3_A+H                 | 1.72764e-11 | 1.000000 | 1.72764e-11 | 1.000000 |
| rad1                          | 1.12376e-11 | 1.000000 | 1.12376e-11 | 1.000000 |
| rad26                         | 8.75993e-12 | 1.000000 | 8.75993e-12 | 1.000000 |
| rad18                         | 6.92717e-12 | 1.000000 | 6.92717e-12 | 1.000000 |
| rad21                         | 6.59936e-12 | 1.000000 | 6.59936e-12 | 1.000000 |
| rad6                          | 5.37971e-12 | 1.000000 | 5.37971e-12 | 1.000000 |
| rad20                         | 1.69887e-12 | 1.000000 | 1.69887e-12 | 1.000000 |
| Phenyl+cycC3H4                | 1.22157e-12 | 1.000000 | 0.000000    | 1.000000 |
| rad22                         | 7.43940e-13 | 1.000000 | 7.43940e-13 | 1.000000 |
| PhcycC3H3_B+H                 | 4.30291e-13 | 1.000000 | 4.30291e-13 | 1.000000 |
| rad5                          | 4.22605e-13 | 1.000000 | 4.22605e-13 | 1.000000 |
| rad45                         | 1.97876e-13 | 1.000000 | 1.97876e-13 | 1.000000 |
| rad67                         | 1.67238e-13 | 1.000000 | 1.67238e-13 | 1.000000 |
| rad35                         | 7.19676e-14 | 1.000000 | 7.19676e-14 | 1.000000 |
| C2H2+PhCH2                    | 3.18696e-14 | 1.000000 | 3.18696e-14 | 1.000000 |
| rad36                         | 2.05045e-14 | 1.000000 | 2.05045e-14 | 1.000000 |
| rad10                         | 1.92256e-14 | 1.000000 | 1.92256e-14 | 1.000000 |
| rad24                         | 1.00528e-14 | 1.000000 | 1.00528e-14 | 1.000000 |
| rad3                          | 5.47823e-15 | 1.000000 | 5.47823e-15 | 1.000000 |
| rad4                          | 3.56275e-15 | 1.000000 | 3.56275e-15 | 1.000000 |
| PhCCCH3+H                     | 2.83036e-15 | 1.000000 | 2.83036e-15 | 1.000000 |
| Ph+MeAc                       | 2.52130e-15 | 1.000000 | 2.52130e-15 | 1.000000 |
| Ph+Allene                     | 9.21362e-16 | 1.000000 | 9.21362e-16 | 1.000000 |

|            |             |         |             |         |
|------------|-------------|---------|-------------|---------|
| rad23      | 7.26438e-16 | 1.00000 | 7.26438e-16 | 1.00000 |
| rad25      | 6.43134e-16 | 1.00000 | 6.43134e-16 | 1.00000 |
| PhCCH+CH3  | 4.48551e-16 | 1.00000 | 4.48551e-16 | 1.00000 |
| rad27      | 3.21578e-16 | 1.00000 | 3.21578e-16 | 1.00000 |
| PhCH2CCH+H | 2.23893e-16 | 1.00000 | 2.23893e-16 | 1.00000 |
| rad13      | 1.39746e-16 | 1.00000 | 1.39746e-16 | 1.00000 |
| rad30      | 5.09334e-17 | 1.00000 | 5.09334e-17 | 1.00000 |
| rad33      | 2.41867e-18 | 1.00000 | 2.41867e-18 | 1.00000 |
| rad37      | 1.21421e-18 | 1.00000 | 1.21421e-18 | 1.00000 |
| rad28      | 5.66809e-19 | 1.00000 | 5.66809e-19 | 1.00000 |
| rad60syn   | 2.92727e-19 | 1.00000 | 2.92727e-19 | 1.00000 |
| PAH3+H     | 2.03898e-19 | 1.00000 | 2.03898e-19 | 1.00000 |
| rad14      | 1.73213e-19 | 1.00000 | 1.73213e-19 | 1.00000 |
| rad60anti  | 1.47800e-19 | 1.00000 | 1.47800e-19 | 1.00000 |
| PAH7+H     | 6.38534e-20 | 1.00000 | 6.38534e-20 | 1.00000 |
| rad31      | 4.01060e-20 | 1.00000 | 4.01060e-20 | 1.00000 |
| rad59      | 3.81631e-20 | 1.00000 | 3.81631e-20 | 1.00000 |
| rad19syn   | 2.59053e-20 | 1.00000 | 2.59053e-20 | 1.00000 |
| rad38      | 1.00361e-20 | 1.00000 | 1.00361e-20 | 1.00000 |
| PAH10+CH3  | 9.05442e-21 | 1.00000 | 9.05442e-21 | 1.00000 |
| rad46      | 1.49898e-22 | 1.00000 | 1.49898e-22 | 1.00000 |
| rad43      | 1.37090e-22 | 1.00000 | 1.37090e-22 | 1.00000 |
| rad58      | 2.55958e-23 | 1.00000 | 2.55958e-23 | 1.00000 |
| rad70      | 2.07021e-23 | 1.00000 | 2.07021e-23 | 1.00000 |
| PAH9+H     | 8.02395e-24 | 1.00000 | 8.02395e-24 | 1.00000 |
| PAH1+H     | 5.16049e-24 | 1.00000 | 5.16049e-24 | 1.00000 |
| rad50      | 2.47604e-24 | 1.00000 | 2.47604e-24 | 1.00000 |
| rad34      | 9.14769e-25 | 1.00000 | 9.14769e-25 | 1.00000 |
| rad39      | 6.19999e-25 | 1.00000 | 6.19999e-25 | 1.00000 |
| rad54      | 1.43494e-25 | 1.00000 | 1.43494e-25 | 1.00000 |
| rad41      | 1.27857e-25 | 1.00000 | 1.27857e-25 | 1.00000 |
| rad62      | 8.17797e-26 | 1.00000 | 8.17797e-26 | 1.00000 |
| rad52      | 3.23134e-26 | 1.00000 | 3.23134e-26 | 1.00000 |
| rad51      | 2.02579e-26 | 1.00000 | 2.02579e-26 | 1.00000 |
| rad47      | 3.32648e-27 | 1.00000 | 3.32648e-27 | 1.00000 |
| rad55      | 2.59929e-27 | 1.00000 | 2.59929e-27 | 1.00000 |
| rad61      | 2.23280e-27 | 1.00000 | 2.23280e-27 | 1.00000 |
| rad42      | 2.05861e-28 | 1.00000 | 2.05861e-28 | 1.00000 |
| rad68syn   | 4.65584e-29 | 1.00000 | 4.65584e-29 | 1.00000 |
| rad68anti  | 3.37645e-29 | 1.00000 | 3.37645e-29 | 1.00000 |
| rad53      | 2.78089e-30 | 1.00000 | 2.78089e-30 | 1.00000 |
| rad65      | 1.42842e-30 | 1.00000 | 1.42842e-30 | 1.00000 |
| rad40syn   | 1.18608e-30 | 1.00000 | 1.18608e-30 | 1.00000 |
| rad40anti  | 8.78716e-31 | 1.00000 | 8.78716e-31 | 1.00000 |
| PAH8+H     | 4.21527e-31 | 1.00000 | 4.21527e-31 | 1.00000 |
| rad56      | 6.68416e-32 | 1.00000 | 6.68416e-32 | 1.00000 |
| rad64      | 5.78743e-33 | 1.00000 | 5.78743e-33 | 1.00000 |
| rad73      | 1.28584e-33 | 1.00000 | 1.28584e-33 | 1.00000 |
| rad71      | 2.41629e-35 | 1.00000 | 2.41629e-35 | 1.00000 |

10000000.0 Pa, 260.000000 K

=====

| Rate constant             | True (fraction)        | Effective (fraction)   |
|---------------------------|------------------------|------------------------|
| Total                     | 2.97464e-14 (1.00 )    | 2.97464e-14 (1.00 )    |
| Formation of rad19        | 2.97293e-14 (0.999 )   | 2.97293e-14 (0.999 )   |
| H-abstraction to cyc2enyl | 1.70236e-17 (0.000572) | 1.70236e-17 (0.000572) |
| H-abstraction to cyclenyl | 3.02186e-20 (1.02e-06) | 3.02186e-20 (1.02e-06) |

| species                       | PYtrue      | Cumul    | PYeffective | Cumul    |
|-------------------------------|-------------|----------|-------------|----------|
| rad19anti                     | 0.630653    | 0.630653 | 0.630653    | 0.630653 |
| rad9                          | 0.368663    | 0.999316 | 0.368663    | 0.999316 |
| Benzene+cycloprop-2-enylidene | 0.000572291 | 0.999888 | 0.000572291 | 0.999888 |
| rad15                         | 0.000100062 | 0.999988 | 0.000100062 | 0.999988 |
| rad8                          | 6.25610e-06 | 0.999994 | 6.25610e-06 | 0.999994 |
| rad12                         | 4.22834e-06 | 0.999999 | 4.22834e-06 | 0.999999 |
| Benzene+cycloprop-1-enylidene | 1.01588e-06 | 1.000000 | 1.01588e-06 | 1.000000 |
| Indene+H                      | 5.26703e-07 | 1.00000  | 5.26703e-07 | 1.00000  |
| PhCHCCH2+H                    | 2.62849e-09 | 1.00000  | 2.62849e-09 | 1.00000  |
| rad7                          | 4.80473e-10 | 1.00000  | 4.80473e-10 | 1.00000  |
| rad11                         | 1.42570e-10 | 1.00000  | 1.42570e-10 | 1.00000  |
| rad2                          | 1.08827e-10 | 1.00000  | 1.08827e-10 | 1.00000  |
| PhcycC3H3_A+H                 | 2.83538e-11 | 1.00000  | 2.83538e-11 | 1.00000  |
| rad1                          | 1.48008e-11 | 1.00000  | 1.48008e-11 | 1.00000  |
| rad26                         | 1.17854e-11 | 1.00000  | 1.17854e-11 | 1.00000  |
| rad18                         | 9.62719e-12 | 1.00000  | 9.62719e-12 | 1.00000  |
| rad21                         | 8.81307e-12 | 1.00000  | 8.81307e-12 | 1.00000  |
| rad6                          | 6.86994e-12 | 1.00000  | 6.86994e-12 | 1.00000  |
| rad20                         | 2.46961e-12 | 1.00000  | 2.46961e-12 | 1.00000  |

|                |             |         |             |         |
|----------------|-------------|---------|-------------|---------|
| Phenyl+cycC3H4 | 1.77900e-12 | 1.00000 | 0.00000     | 1.00000 |
| rad22          | 1.10847e-12 | 1.00000 | 1.10847e-12 | 1.00000 |
| PhcycC3H3_B+H  | 8.62644e-13 | 1.00000 | 8.62644e-13 | 1.00000 |
| rad5           | 5.01772e-13 | 1.00000 | 5.01772e-13 | 1.00000 |
| rad45          | 3.01929e-13 | 1.00000 | 3.01929e-13 | 1.00000 |
| rad67          | 2.55152e-13 | 1.00000 | 2.55152e-13 | 1.00000 |
| rad35          | 1.09019e-13 | 1.00000 | 1.09019e-13 | 1.00000 |
| C2H2+PhCH2     | 5.62293e-14 | 1.00000 | 5.62293e-14 | 1.00000 |
| rad36          | 3.11748e-14 | 1.00000 | 3.11748e-14 | 1.00000 |
| rad10          | 3.00798e-14 | 1.00000 | 3.00798e-14 | 1.00000 |
| rad24          | 1.31668e-14 | 1.00000 | 1.31668e-14 | 1.00000 |
| rad3           | 8.69357e-15 | 1.00000 | 8.69357e-15 | 1.00000 |
| rad4           | 5.64956e-15 | 1.00000 | 5.64956e-15 | 1.00000 |
| PhCCCH3+H      | 4.83210e-15 | 1.00000 | 4.83210e-15 | 1.00000 |
| Ph+MeAc        | 4.46355e-15 | 1.00000 | 4.46355e-15 | 1.00000 |
| Ph+Allene      | 1.61684e-15 | 1.00000 | 1.61684e-15 | 1.00000 |
| rad23          | 1.27461e-15 | 1.00000 | 1.27461e-15 | 1.00000 |
| rad25          | 1.02353e-15 | 1.00000 | 1.02353e-15 | 1.00000 |
| PhCCH+CH3      | 6.46772e-16 | 1.00000 | 6.46772e-16 | 1.00000 |
| rad27          | 5.18745e-16 | 1.00000 | 5.18745e-16 | 1.00000 |
| PhCH2CCH+H     | 4.13396e-16 | 1.00000 | 4.13396e-16 | 1.00000 |
| rad13          | 2.01231e-16 | 1.00000 | 2.01231e-16 | 1.00000 |
| rad30          | 8.91249e-17 | 1.00000 | 8.91249e-17 | 1.00000 |
| rad33          | 3.40077e-18 | 1.00000 | 3.40077e-18 | 1.00000 |
| rad37          | 2.26607e-18 | 1.00000 | 2.26607e-18 | 1.00000 |
| rad28          | 1.06769e-18 | 1.00000 | 1.06769e-18 | 1.00000 |
| rad60syn       | 5.58615e-19 | 1.00000 | 5.58615e-19 | 1.00000 |
| PAH3+H         | 4.28308e-19 | 1.00000 | 4.28308e-19 | 1.00000 |
| rad14          | 3.52494e-19 | 1.00000 | 3.52494e-19 | 1.00000 |
| rad60anti      | 2.84093e-19 | 1.00000 | 2.84093e-19 | 1.00000 |
| PAH7+H         | 1.35240e-19 | 1.00000 | 1.35240e-19 | 1.00000 |
| rad59          | 7.89198e-20 | 1.00000 | 7.89198e-20 | 1.00000 |
| rad19syn       | 6.09578e-20 | 1.00000 | 6.09578e-20 | 1.00000 |
| rad31          | 5.50308e-20 | 1.00000 | 5.50308e-20 | 1.00000 |
| rad38          | 2.11037e-20 | 1.00000 | 2.11037e-20 | 1.00000 |
| PAH10+CH3      | 2.08308e-20 | 1.00000 | 2.08308e-20 | 1.00000 |
| rad43          | 3.51761e-22 | 1.00000 | 3.51761e-22 | 1.00000 |
| rad46          | 3.30812e-22 | 1.00000 | 3.30812e-22 | 1.00000 |
| rad58          | 6.57241e-23 | 1.00000 | 6.57241e-23 | 1.00000 |
| rad70          | 5.53082e-23 | 1.00000 | 5.53082e-23 | 1.00000 |
| PAH9+H         | 1.99844e-23 | 1.00000 | 1.99844e-23 | 1.00000 |
| PAH1+H         | 1.36367e-23 | 1.00000 | 1.36367e-23 | 1.00000 |
| rad50          | 6.25629e-24 | 1.00000 | 6.25629e-24 | 1.00000 |
| rad34          | 2.60505e-24 | 1.00000 | 2.60505e-24 | 1.00000 |
| rad39          | 1.64739e-24 | 1.00000 | 1.64739e-24 | 1.00000 |
| rad41          | 3.88029e-25 | 1.00000 | 3.88029e-25 | 1.00000 |
| rad54          | 3.12979e-25 | 1.00000 | 3.12979e-25 | 1.00000 |
| rad62          | 2.58672e-25 | 1.00000 | 2.58672e-25 | 1.00000 |
| rad52          | 8.80603e-26 | 1.00000 | 8.80603e-26 | 1.00000 |
| rad51          | 5.86934e-26 | 1.00000 | 5.86934e-26 | 1.00000 |
| rad47          | 9.22952e-27 | 1.00000 | 9.22952e-27 | 1.00000 |
| rad61          | 7.42103e-27 | 1.00000 | 7.42103e-27 | 1.00000 |
| rad55          | 6.05211e-27 | 1.00000 | 6.05211e-27 | 1.00000 |
| rad42          | 7.20588e-28 | 1.00000 | 7.20588e-28 | 1.00000 |
| rad68syn       | 1.66909e-28 | 1.00000 | 1.66909e-28 | 1.00000 |
| rad68anti      | 1.20766e-28 | 1.00000 | 1.20766e-28 | 1.00000 |
| rad53          | 8.05188e-30 | 1.00000 | 8.05188e-30 | 1.00000 |
| rad65          | 4.68462e-30 | 1.00000 | 4.68462e-30 | 1.00000 |
| rad40syn       | 4.61238e-30 | 1.00000 | 4.61238e-30 | 1.00000 |
| rad40anti      | 3.42773e-30 | 1.00000 | 3.42773e-30 | 1.00000 |
| PAH8+H         | 1.69716e-30 | 1.00000 | 1.69716e-30 | 1.00000 |
| rad56          | 2.20541e-31 | 1.00000 | 2.20541e-31 | 1.00000 |
| rad64          | 2.10542e-32 | 1.00000 | 2.10542e-32 | 1.00000 |
| rad73          | 5.39949e-33 | 1.00000 | 5.39949e-33 | 1.00000 |
| rad71          | 1.07066e-34 | 1.00000 | 1.07066e-34 | 1.00000 |

10000000.0 Pa, 270.000000 K

| Rate constant             | True (fraction)        | Effective (fraction)   |
|---------------------------|------------------------|------------------------|
| Total                     | 3.24655e-14 (1.00 )    | 3.24655e-14 (1.00 )    |
| Formation of rad19        | 3.24415e-14 (0.999 )   | 3.24415e-14 (0.999 )   |
| H-abstraction to cyc2enyl | 2.38790e-17 (0.000736) | 2.38790e-17 (0.000736) |
| H-abstraction to cyclenyl | 5.45397e-20 (1.68e-06) | 5.45397e-20 (1.68e-06) |

  

| species                       | PYtrue      | Cumul    | PYeffective | Cumul    |
|-------------------------------|-------------|----------|-------------|----------|
| rad19anti                     | 0.612364    | 0.612364 | 0.612364    | 0.612364 |
| rad9                          | 0.386774    | 0.999138 | 0.386774    | 0.999138 |
| Benzene+cycloprop-2-enylidene | 0.000735519 | 0.999873 | 0.000735519 | 0.999873 |

|                               |             |          |             |          |
|-------------------------------|-------------|----------|-------------|----------|
| rad15                         | 0.000114734 | 0.999988 | 0.000114734 | 0.999988 |
| rad8                          | 5.11540e-06 | 0.999993 | 5.11540e-06 | 0.999993 |
| rad12                         | 4.31466e-06 | 0.999998 | 4.31466e-06 | 0.999998 |
| Benzene+cycloprop-1-enylidene | 1.67993e-06 | 0.999999 | 1.67993e-06 | 0.999999 |
| Indene+H                      | 6.72333e-07 | 1.000000 | 6.72333e-07 | 1.000000 |
| PhCHCH2+H                     | 3.46263e-09 | 1.000000 | 3.46263e-09 | 1.000000 |
| rad7                          | 5.49325e-10 | 1.000000 | 5.49325e-10 | 1.000000 |
| rad11                         | 1.89469e-10 | 1.000000 | 1.89469e-10 | 1.000000 |
| rad2                          | 1.45419e-10 | 1.000000 | 1.45419e-10 | 1.000000 |
| PhcycC3H3_A+H                 | 4.70056e-11 | 1.000000 | 4.70056e-11 | 1.000000 |
| rad1                          | 1.97706e-11 | 1.000000 | 1.97706e-11 | 1.000000 |
| rad26                         | 1.60471e-11 | 1.000000 | 1.60471e-11 | 1.000000 |
| rad18                         | 1.35600e-11 | 1.000000 | 1.35600e-11 | 1.000000 |
| rad21                         | 1.19152e-11 | 1.000000 | 1.19152e-11 | 1.000000 |
| rad6                          | 8.86269e-12 | 1.000000 | 8.86269e-12 | 1.000000 |
| rad20                         | 3.64499e-12 | 1.000000 | 3.64499e-12 | 1.000000 |
| Phenyl+cycC3H4                | 2.58008e-12 | 1.000000 | 0.000000    | 1.000000 |
| PhcycC3H3_B+H                 | 1.71788e-12 | 1.000000 | 1.71788e-12 | 1.000000 |
| rad22                         | 1.68087e-12 | 1.000000 | 1.68087e-12 | 1.000000 |
| rad5                          | 6.03029e-13 | 1.000000 | 6.03029e-13 | 1.000000 |
| rad45                         | 4.68993e-13 | 1.000000 | 4.68993e-13 | 1.000000 |
| rad67                         | 3.97101e-13 | 1.000000 | 3.97101e-13 | 1.000000 |
| rad35                         | 1.68422e-13 | 1.000000 | 1.68422e-13 | 1.000000 |
| C2H2+PhCH2                    | 1.01636e-13 | 1.000000 | 1.01636e-13 | 1.000000 |
| rad36                         | 4.82944e-14 | 1.000000 | 4.82944e-14 | 1.000000 |
| rad10                         | 4.81396e-14 | 1.000000 | 4.81396e-14 | 1.000000 |
| rad24                         | 1.74598e-14 | 1.000000 | 1.74598e-14 | 1.000000 |
| rad3                          | 1.41157e-14 | 1.000000 | 1.41157e-14 | 1.000000 |
| rad4                          | 9.16920e-15 | 1.000000 | 9.16920e-15 | 1.000000 |
| PhCCCH3+H                     | 8.46655e-15 | 1.000000 | 8.46655e-15 | 1.000000 |
| Ph+MeAc                       | 8.11121e-15 | 1.000000 | 8.11121e-15 | 1.000000 |
| Ph+Allene                     | 2.90905e-15 | 1.000000 | 2.90905e-15 | 1.000000 |
| rad23                         | 2.28842e-15 | 1.000000 | 2.28842e-15 | 1.000000 |
| rad25                         | 1.66455e-15 | 1.000000 | 1.66455e-15 | 1.000000 |
| PhCCH+CH3                     | 9.66383e-16 | 1.000000 | 9.66383e-16 | 1.000000 |
| rad27                         | 8.55509e-16 | 1.000000 | 8.55509e-16 | 1.000000 |
| PhCH2CCH+H                    | 7.81861e-16 | 1.000000 | 7.81861e-16 | 1.000000 |
| rad13                         | 2.94656e-16 | 1.000000 | 2.94656e-16 | 1.000000 |
| rad30                         | 1.59853e-16 | 1.000000 | 1.59853e-16 | 1.000000 |
| rad33                         | 4.83415e-18 | 1.000000 | 4.83415e-18 | 1.000000 |
| rad37                         | 4.32488e-18 | 1.000000 | 4.32488e-18 | 1.000000 |
| rad28                         | 2.05613e-18 | 1.000000 | 2.05613e-18 | 1.000000 |
| rad60syn                      | 1.09202e-18 | 1.000000 | 1.09202e-18 | 1.000000 |
| PAH3+H                        | 9.16506e-19 | 1.000000 | 9.16506e-19 | 1.000000 |
| rad14                         | 7.33969e-19 | 1.000000 | 7.33969e-19 | 1.000000 |
| rad60anti                     | 5.59249e-19 | 1.000000 | 5.59249e-19 | 1.000000 |
| PAH7+H                        | 2.91410e-19 | 1.000000 | 2.91410e-19 | 1.000000 |
| rad59                         | 1.66420e-19 | 1.000000 | 1.66420e-19 | 1.000000 |
| rad19syn                      | 1.52975e-19 | 1.000000 | 1.52975e-19 | 1.000000 |
| rad31                         | 7.73253e-20 | 1.000000 | 7.73253e-20 | 1.000000 |
| PAH10+CH3                     | 4.81144e-20 | 1.000000 | 4.81144e-20 | 1.000000 |
| rad38                         | 4.50781e-20 | 1.000000 | 4.50781e-20 | 1.000000 |
| rad43                         | 8.96785e-22 | 1.000000 | 8.96785e-22 | 1.000000 |
| rad46                         | 7.42046e-22 | 1.000000 | 7.42046e-22 | 1.000000 |
| rad58                         | 1.66980e-22 | 1.000000 | 1.66980e-22 | 1.000000 |
| rad70                         | 1.45213e-22 | 1.000000 | 1.45213e-22 | 1.000000 |
| PAH9+H                        | 5.00783e-23 | 1.000000 | 5.00783e-23 | 1.000000 |
| PAH1+H                        | 3.53272e-23 | 1.000000 | 3.53272e-23 | 1.000000 |
| rad50                         | 1.58055e-23 | 1.000000 | 1.58055e-23 | 1.000000 |
| rad34                         | 7.19151e-24 | 1.000000 | 7.19151e-24 | 1.000000 |
| rad39                         | 4.32929e-24 | 1.000000 | 4.32929e-24 | 1.000000 |
| rad41                         | 1.12973e-24 | 1.000000 | 1.12973e-24 | 1.000000 |
| rad62                         | 7.88220e-25 | 1.000000 | 7.88220e-25 | 1.000000 |
| rad54                         | 6.90109e-25 | 1.000000 | 6.90109e-25 | 1.000000 |
| rad52                         | 2.36927e-25 | 1.000000 | 2.36927e-25 | 1.000000 |
| rad51                         | 1.65896e-25 | 1.000000 | 1.65896e-25 | 1.000000 |
| rad47                         | 2.47833e-26 | 1.000000 | 2.47833e-26 | 1.000000 |
| rad61                         | 2.29061e-26 | 1.000000 | 2.29061e-26 | 1.000000 |
| rad55                         | 1.41370e-26 | 1.000000 | 1.41370e-26 | 1.000000 |
| rad42                         | 2.37189e-27 | 1.000000 | 2.37189e-27 | 1.000000 |
| rad68syn                      | 5.48407e-28 | 1.000000 | 5.48407e-28 | 1.000000 |
| rad68anti                     | 3.96102e-28 | 1.000000 | 3.96102e-28 | 1.000000 |
| rad53                         | 2.25080e-29 | 1.000000 | 2.25080e-29 | 1.000000 |
| rad40syn                      | 1.62026e-29 | 1.000000 | 1.62026e-29 | 1.000000 |
| rad65                         | 1.46111e-29 | 1.000000 | 1.46111e-29 | 1.000000 |
| rad40anti                     | 1.20836e-29 | 1.000000 | 1.20836e-29 | 1.000000 |
| PAH8+H                        | 6.12526e-30 | 1.000000 | 6.12526e-30 | 1.000000 |
| rad56                         | 6.81820e-31 | 1.000000 | 6.81820e-31 | 1.000000 |
| rad64                         | 7.02435e-32 | 1.000000 | 7.02435e-32 | 1.000000 |
| rad73                         | 2.04305e-32 | 1.000000 | 2.04305e-32 | 1.000000 |

rad71 | 4.23771e-34 1.000000 | 4.23771e-34 1.000000

10000000.0 Pa, 280.000000 K

| Rate constant             | True (fraction)        | Effective (fraction)   |
|---------------------------|------------------------|------------------------|
| Total                     | 3.52572e-14 (1.00 )    | 3.52572e-14 (1.00 )    |
| Formation of rad19        | 3.52244e-14 (0.999 )   | 3.52244e-14 (0.999 )   |
| H-abstraction to cyc2enyl | 3.26639e-17 (0.000926) | 3.26639e-17 (0.000926) |
| H-abstraction to cyclenyl | 9.42926e-20 (2.67e-06) | 9.42926e-20 (2.67e-06) |

| species                       | PYtrue      | Cumul    | PYeffective | Cumul    |
|-------------------------------|-------------|----------|-------------|----------|
| rad19anti                     | 0.593446    | 0.593446 | 0.593446    | 0.593446 |
| rad9                          | 0.405484    | 0.998930 | 0.405484    | 0.998930 |
| Benzene+cycloprop-2-enylidene | 0.000926445 | 0.999856 | 0.000926445 | 0.999856 |
| rad15                         | 0.000131825 | 0.999988 | 0.000131825 | 0.999988 |
| rad12                         | 4.40451e-06 | 0.999993 | 4.40451e-06 | 0.999993 |
| rad8                          | 4.18633e-06 | 0.999997 | 4.18633e-06 | 0.999997 |
| Benzene+cycloprop-1-enylidene | 2.67442e-06 | 1.000000 | 2.67442e-06 | 1.000000 |
| Indene+H                      | 8.64490e-07 | 1.000000 | 8.64490e-07 | 1.000000 |
| PhCHCCH2+H                    | 4.62013e-09 | 1.000000 | 4.62013e-09 | 1.000000 |
| rad7                          | 6.30172e-10 | 1.000000 | 6.30172e-10 | 1.000000 |
| rad11                         | 2.55096e-10 | 1.000000 | 2.55096e-10 | 1.000000 |
| rad2                          | 1.96931e-10 | 1.000000 | 1.96931e-10 | 1.000000 |
| PhcycC3H3_A+H                 | 7.83720e-11 | 1.000000 | 7.83720e-11 | 1.000000 |
| rad1                          | 2.67981e-11 | 1.000000 | 2.67981e-11 | 1.000000 |
| rad26                         | 2.21214e-11 | 1.000000 | 2.21214e-11 | 1.000000 |
| rad18                         | 1.93611e-11 | 1.000000 | 1.93611e-11 | 1.000000 |
| rad21                         | 1.63075e-11 | 1.000000 | 1.63075e-11 | 1.000000 |
| rad6                          | 1.15630e-11 | 1.000000 | 1.15630e-11 | 1.000000 |
| rad20                         | 5.45558e-12 | 1.000000 | 5.45558e-12 | 1.000000 |
| Phenyl+cycC3H4                | 3.72431e-12 | 1.000000 | 0.000000    | 1.000000 |
| PhcycC3H3_B+H                 | 3.37230e-12 | 1.000000 | 3.37230e-12 | 1.000000 |
| rad22                         | 2.59104e-12 | 1.000000 | 2.59104e-12 | 1.000000 |
| rad45                         | 7.40404e-13 | 1.000000 | 7.40404e-13 | 1.000000 |
| rad5                          | 7.35525e-13 | 1.000000 | 7.35525e-13 | 1.000000 |
| rad67                         | 6.29417e-13 | 1.000000 | 6.29417e-13 | 1.000000 |
| rad35                         | 2.64978e-13 | 1.000000 | 2.64978e-13 | 1.000000 |
| C2H2+PhCH2                    | 1.86814e-13 | 1.000000 | 1.86814e-13 | 1.000000 |
| rad10                         | 7.86295e-14 | 1.000000 | 7.86295e-14 | 1.000000 |
| rad36                         | 7.61096e-14 | 1.000000 | 7.61096e-14 | 1.000000 |
| rad24                         | 2.34392e-14 | 1.000000 | 2.34392e-14 | 1.000000 |
| rad3                          | 2.33848e-14 | 1.000000 | 2.33848e-14 | 1.000000 |
| rad4                          | 1.51889e-14 | 1.000000 | 1.51889e-14 | 1.000000 |
| PhCCCH3+H                     | 1.51334e-14 | 1.000000 | 1.51334e-14 | 1.000000 |
| Ph+MeAc                       | 1.50113e-14 | 1.000000 | 1.50113e-14 | 1.000000 |
| Ph+Allene                     | 5.32556e-15 | 1.000000 | 5.32556e-15 | 1.000000 |
| rad23                         | 4.18010e-15 | 1.000000 | 4.18010e-15 | 1.000000 |
| rad25                         | 2.75708e-15 | 1.000000 | 2.75708e-15 | 1.000000 |
| PhCCH+CH3                     | 1.50353e-15 | 1.000000 | 1.50353e-15 | 1.000000 |
| PhCH2CCH+H                    | 1.49942e-15 | 1.000000 | 1.49942e-15 | 1.000000 |
| rad27                         | 1.43719e-15 | 1.000000 | 1.43719e-15 | 1.000000 |
| rad13                         | 4.39427e-16 | 1.000000 | 4.39427e-16 | 1.000000 |
| rad30                         | 2.92070e-16 | 1.000000 | 2.92070e-16 | 1.000000 |
| rad37                         | 8.35890e-18 | 1.000000 | 8.35890e-18 | 1.000000 |
| rad33                         | 6.95293e-18 | 1.000000 | 6.95293e-18 | 1.000000 |
| rad28                         | 4.00681e-18 | 1.000000 | 4.00681e-18 | 1.000000 |
| rad60syn                      | 2.16360e-18 | 1.000000 | 2.16360e-18 | 1.000000 |
| PAH3+H                        | 1.96773e-18 | 1.000000 | 1.96773e-18 | 1.000000 |
| rad14                         | 1.54363e-18 | 1.000000 | 1.54363e-18 | 1.000000 |
| rad60anti                     | 1.11508e-18 | 1.000000 | 1.11508e-18 | 1.000000 |
| PAH7+H                        | 6.28894e-19 | 1.000000 | 6.28894e-19 | 1.000000 |
| rad19syn                      | 4.07303e-19 | 1.000000 | 4.07303e-19 | 1.000000 |
| rad59                         | 3.52726e-19 | 1.000000 | 3.52726e-19 | 1.000000 |
| rad31                         | 1.11377e-19 | 1.000000 | 1.11377e-19 | 1.000000 |
| PAH10+CH3                     | 1.09698e-19 | 1.000000 | 1.09698e-19 | 1.000000 |
| rad38                         | 9.63900e-20 | 1.000000 | 9.63900e-20 | 1.000000 |
| rad43                         | 2.23093e-21 | 1.000000 | 2.23093e-21 | 1.000000 |
| rad46                         | 1.66532e-21 | 1.000000 | 1.66532e-21 | 1.000000 |
| rad58                         | 4.12415e-22 | 1.000000 | 4.12415e-22 | 1.000000 |
| rad70                         | 3.68232e-22 | 1.000000 | 3.68232e-22 | 1.000000 |
| PAH9+H                        | 1.23776e-22 | 1.000000 | 1.23776e-22 | 1.000000 |
| PAH1+H                        | 8.82796e-23 | 1.000000 | 8.82796e-23 | 1.000000 |
| rad50                         | 3.91953e-23 | 1.000000 | 3.91953e-23 | 1.000000 |
| rad34                         | 1.89524e-23 | 1.000000 | 1.89524e-23 | 1.000000 |
| rad39                         | 1.10385e-23 | 1.000000 | 1.10385e-23 | 1.000000 |
| rad41                         | 3.11478e-24 | 1.000000 | 3.11478e-24 | 1.000000 |
| rad62                         | 2.28022e-24 | 1.000000 | 2.28022e-24 | 1.000000 |
| rad54                         | 1.52189e-24 | 1.000000 | 1.52189e-24 | 1.000000 |

|           |             |         |             |         |
|-----------|-------------|---------|-------------|---------|
| rad52     | 6.18281e-25 | 1.00000 | 6.18281e-25 | 1.00000 |
| rad51     | 4.50094e-25 | 1.00000 | 4.50094e-25 | 1.00000 |
| rad61     | 6.53455e-26 | 1.00000 | 6.53455e-26 | 1.00000 |
| rad47     | 6.37039e-26 | 1.00000 | 6.37039e-26 | 1.00000 |
| rad55     | 3.27287e-26 | 1.00000 | 3.27287e-26 | 1.00000 |
| rad42     | 7.27827e-27 | 1.00000 | 7.27827e-27 | 1.00000 |
| rad68syn  | 1.64859e-27 | 1.00000 | 1.64859e-27 | 1.00000 |
| rad68anti | 1.18913e-27 | 1.00000 | 1.18913e-27 | 1.00000 |
| rad53     | 6.01211e-29 | 1.00000 | 6.01211e-29 | 1.00000 |
| rad40syn  | 5.15430e-29 | 1.00000 | 5.15430e-29 | 1.00000 |
| rad65     | 4.28080e-29 | 1.00000 | 4.28080e-29 | 1.00000 |
| rad40anti | 3.85894e-29 | 1.00000 | 3.85894e-29 | 1.00000 |
| PAH8+H    | 1.99028e-29 | 1.00000 | 1.99028e-29 | 1.00000 |
| rad56     | 1.96665e-30 | 1.00000 | 1.96665e-30 | 1.00000 |
| rad64     | 2.14377e-31 | 1.00000 | 2.14377e-31 | 1.00000 |
| rad73     | 6.98744e-32 | 1.00000 | 6.98744e-32 | 1.00000 |
| rad71     | 1.50598e-33 | 1.00000 | 1.50598e-33 | 1.00000 |

10000000.0 Pa, 290.000000 K

| Rate constant             | True (fraction)        | Effective (fraction)   |
|---------------------------|------------------------|------------------------|
| Total                     | 3.81171e-14 (1.00 )    | 3.81171e-14 (1.00 )    |
| Formation of rad19        | 3.80733e-14 (0.999 )   | 3.80733e-14 (0.999 )   |
| H-abstraction to cyc2enyl | 4.36868e-17 (0.00115 ) | 4.36868e-17 (0.00115 ) |
| H-abstraction to cyclenyl | 1.56861e-19 (4.12e-06) | 1.56861e-19 (4.12e-06) |

| species                       | PYtrue      | Cumul    | PYeffective | Cumul    |
|-------------------------------|-------------|----------|-------------|----------|
| rad19anti                     | 0.573904    | 0.573904 | 0.573904    | 0.573904 |
| rad9                          | 0.424785    | 0.998689 | 0.424785    | 0.998689 |
| Benzene+cycloprop-2-enylidene | 0.00114612  | 0.999835 | 0.00114612  | 0.999835 |
| rad15                         | 0.000151798 | 0.999987 | 0.000151798 | 0.999987 |
| rad12                         | 4.49799e-06 | 0.999991 | 4.49799e-06 | 0.999991 |
| Benzene+cycloprop-1-enylidene | 4.11523e-06 | 0.999995 | 4.11523e-06 | 0.999995 |
| rad8                          | 3.42902e-06 | 0.999999 | 3.42902e-06 | 0.999999 |
| Indene+H                      | 1.12004e-06 | 1.00000  | 1.12004e-06 | 1.00000  |
| PhCHCCH2+H                    | 6.24103e-09 | 1.00000  | 6.24103e-09 | 1.00000  |
| rad7                          | 7.25113e-10 | 1.00000  | 7.25113e-10 | 1.00000  |
| rad11                         | 3.47725e-10 | 1.00000  | 3.47725e-10 | 1.00000  |
| rad2                          | 2.70075e-10 | 1.00000  | 2.70075e-10 | 1.00000  |
| PhcycC3H3_A+H                 | 1.30536e-10 | 1.00000  | 1.30536e-10 | 1.00000  |
| rad1                          | 3.68336e-11 | 1.00000  | 3.68336e-11 | 1.00000  |
| rad26                         | 3.08480e-11 | 1.00000  | 3.08480e-11 | 1.00000  |
| rad18                         | 2.79846e-11 | 1.00000  | 2.79846e-11 | 1.00000  |
| rad21                         | 2.25631e-11 | 1.00000  | 2.25631e-11 | 1.00000  |
| rad6                          | 1.52697e-11 | 1.00000  | 1.52697e-11 | 1.00000  |
| rad20                         | 8.25360e-12 | 1.00000  | 8.25360e-12 | 1.00000  |
| PhcycC3H3_B+H                 | 6.46767e-12 | 1.00000  | 6.46767e-12 | 1.00000  |
| Phenyl+cycC3H4                | 5.34711e-12 | 1.00000  | 0.00000     | 1.00000  |
| rad22                         | 4.04546e-12 | 1.00000  | 4.04546e-12 | 1.00000  |
| rad45                         | 1.18275e-12 | 1.00000  | 1.18275e-12 | 1.00000  |
| rad67                         | 1.01138e-12 | 1.00000  | 1.01138e-12 | 1.00000  |
| rad5                          | 9.12968e-13 | 1.00000  | 9.12968e-13 | 1.00000  |
| rad35                         | 4.22730e-13 | 1.00000  | 4.22730e-13 | 1.00000  |
| C2H2+PhCH2                    | 3.45355e-13 | 1.00000  | 3.45355e-13 | 1.00000  |
| rad10                         | 1.30335e-13 | 1.00000  | 1.30335e-13 | 1.00000  |
| rad36                         | 1.21489e-13 | 1.00000  | 1.21489e-13 | 1.00000  |
| rad3                          | 3.92759e-14 | 1.00000  | 3.92759e-14 | 1.00000  |
| rad24                         | 3.18146e-14 | 1.00000  | 3.18146e-14 | 1.00000  |
| Ph+MeAc                       | 2.79642e-14 | 1.00000  | 2.79642e-14 | 1.00000  |
| PhCCCH3+H                     | 2.73192e-14 | 1.00000  | 2.73192e-14 | 1.00000  |
| rad4                          | 2.55182e-14 | 1.00000  | 2.55182e-14 | 1.00000  |
| Ph+Allene                     | 9.80678e-15 | 1.00000  | 9.80678e-15 | 1.00000  |
| rad23                         | 7.69397e-15 | 1.00000  | 7.69397e-15 | 1.00000  |
| rad25                         | 4.61994e-15 | 1.00000  | 4.61994e-15 | 1.00000  |
| PhCH2CCH+H                    | 2.87661e-15 | 1.00000  | 2.87661e-15 | 1.00000  |
| rad27                         | 2.44202e-15 | 1.00000  | 2.44202e-15 | 1.00000  |
| PhCCH+CH3                     | 2.43313e-15 | 1.00000  | 2.43313e-15 | 1.00000  |
| rad13                         | 6.67289e-16 | 1.00000  | 6.67289e-16 | 1.00000  |
| rad30                         | 5.38060e-16 | 1.00000  | 5.38060e-16 | 1.00000  |
| rad37                         | 1.61478e-17 | 1.00000  | 1.61478e-17 | 1.00000  |
| rad33                         | 1.01174e-17 | 1.00000  | 1.01174e-17 | 1.00000  |
| rad28                         | 7.79557e-18 | 1.00000  | 7.79557e-18 | 1.00000  |
| rad60syn                      | 4.28397e-18 | 1.00000  | 4.28397e-18 | 1.00000  |
| PAH3+H                        | 4.16951e-18 | 1.00000  | 4.16951e-18 | 1.00000  |
| rad14                         | 3.22920e-18 | 1.00000  | 3.22920e-18 | 1.00000  |
| rad60anti                     | 2.21999e-18 | 1.00000  | 2.21999e-18 | 1.00000  |
| PAH7+H                        | 1.33693e-18 | 1.00000  | 1.33693e-18 | 1.00000  |
| rad19syn                      | 1.14434e-18 | 1.00000  | 1.14434e-18 | 1.00000  |

|           |             |         |             |         |
|-----------|-------------|---------|-------------|---------|
| rad59     | 7.39382e-19 | 1.00000 | 7.39382e-19 | 1.00000 |
| PAH10+CH3 | 2.43014e-19 | 1.00000 | 2.43014e-19 | 1.00000 |
| rad38     | 2.03107e-19 | 1.00000 | 2.03107e-19 | 1.00000 |
| rad31     | 1.64425e-19 | 1.00000 | 1.64425e-19 | 1.00000 |
| rad43     | 5.33553e-21 | 1.00000 | 5.33553e-21 | 1.00000 |
| rad46     | 3.67859e-21 | 1.00000 | 3.67859e-21 | 1.00000 |
| rad58     | 9.76131e-22 | 1.00000 | 9.76131e-22 | 1.00000 |
| rad70     | 8.89839e-22 | 1.00000 | 8.89839e-22 | 1.00000 |
| PAH9+H    | 2.96537e-22 | 1.00000 | 2.96537e-22 | 1.00000 |
| PAH1+H    | 2.10132e-22 | 1.00000 | 2.10132e-22 | 1.00000 |
| rad50     | 9.39289e-23 | 1.00000 | 9.39289e-23 | 1.00000 |
| rad34     | 4.71616e-23 | 1.00000 | 4.71616e-23 | 1.00000 |
| rad39     | 2.69030e-23 | 1.00000 | 2.69030e-23 | 1.00000 |
| rad41     | 8.06296e-24 | 1.00000 | 8.06296e-24 | 1.00000 |
| rad62     | 6.20242e-24 | 1.00000 | 6.20242e-24 | 1.00000 |
| rad54     | 3.31323e-24 | 1.00000 | 3.31323e-24 | 1.00000 |
| rad52     | 1.54359e-24 | 1.00000 | 1.54359e-24 | 1.00000 |
| rad51     | 1.15866e-24 | 1.00000 | 1.15866e-24 | 1.00000 |
| rad61     | 1.71909e-25 | 1.00000 | 1.71909e-25 | 1.00000 |
| rad47     | 1.55505e-25 | 1.00000 | 1.55505e-25 | 1.00000 |
| rad55     | 7.41105e-26 | 1.00000 | 7.41105e-26 | 1.00000 |
| rad42     | 2.07238e-26 | 1.00000 | 2.07238e-26 | 1.00000 |
| rad68syn  | 4.53533e-27 | 1.00000 | 4.53533e-27 | 1.00000 |
| rad68anti | 3.26790e-27 | 1.00000 | 3.26790e-27 | 1.00000 |
| rad53     | 1.52168e-28 | 1.00000 | 1.52168e-28 | 1.00000 |
| rad40syn  | 1.48974e-28 | 1.00000 | 1.48974e-28 | 1.00000 |
| rad65     | 1.16957e-28 | 1.00000 | 1.16957e-28 | 1.00000 |
| rad40anti | 1.12005e-28 | 1.00000 | 1.12005e-28 | 1.00000 |
| PAH8+H    | 5.84957e-29 | 1.00000 | 5.84957e-29 | 1.00000 |
| rad56     | 5.27787e-30 | 1.00000 | 5.27787e-30 | 1.00000 |
| rad64     | 5.98405e-31 | 1.00000 | 5.98405e-31 | 1.00000 |
| rad73     | 2.16817e-31 | 1.00000 | 2.16817e-31 | 1.00000 |
| rad71     | 4.83020e-33 | 1.00000 | 4.83020e-33 | 1.00000 |

10000000.0 Pa, 300.000000 K

=====

| Rate constant             | True (fraction)        | Effective (fraction)   |
|---------------------------|------------------------|------------------------|
| Total                     | 5.34809e-14 (1.00 )    | 5.34809e-14 (1.00 )    |
| Formation of rad19        | 5.34010e-14 (0.999 )   | 5.34010e-14 (0.999 )   |
| H-abstraction to cyc2enyl | 7.95823e-17 (0.00149 ) | 7.95823e-17 (0.00149 ) |
| H-abstraction to cyclenyl | 3.44981e-19 (6.45e-06) | 3.44981e-19 (6.45e-06) |

| species                       | PYtrue      | Cumul    | PYeffective | Cumul    |
|-------------------------------|-------------|----------|-------------|----------|
| rad9                          | 0.506290    | 0.506290 | 0.506290    | 0.506290 |
| rad19anti                     | 0.491852    | 0.998142 | 0.491852    | 0.998142 |
| Benzene+cycloprop-2-enylidene | 0.00148805  | 0.999630 | 0.00148805  | 0.999630 |
| rad15                         | 0.000348117 | 0.999978 | 0.000348117 | 0.999978 |
| Indene+H                      | 7.95408e-06 | 0.999986 | 7.95408e-06 | 0.999986 |
| Benzene+cycloprop-1-enylidene | 6.45054e-06 | 0.999993 | 6.45054e-06 | 0.999993 |
| rad12                         | 4.97057e-06 | 0.999998 | 4.97057e-06 | 0.999998 |
| rad8                          | 2.39656e-06 | 1.000000 | 2.39656e-06 | 1.000000 |
| PhCHCCH2+H                    | 7.11810e-08 | 1.00000  | 7.11810e-08 | 1.00000  |
| PhcycC3H3_A+H                 | 5.76274e-09 | 1.00000  | 5.76274e-09 | 1.00000  |
| rad11                         | 4.63023e-09 | 1.00000  | 4.63023e-09 | 1.00000  |
| rad2                          | 3.70230e-09 | 1.00000  | 3.70230e-09 | 1.00000  |
| PhcycC3H3_B+H                 | 1.15392e-09 | 1.00000  | 1.15392e-09 | 1.00000  |
| rad7                          | 8.72540e-10 | 1.00000  | 8.72540e-10 | 1.00000  |
| rad18                         | 5.64107e-10 | 1.00000  | 5.64107e-10 | 1.00000  |
| rad26                         | 4.99750e-10 | 1.00000  | 4.99750e-10 | 1.00000  |
| rad1                          | 4.92395e-10 | 1.00000  | 4.92395e-10 | 1.00000  |
| rad6                          | 3.16361e-10 | 1.00000  | 3.16361e-10 | 1.00000  |
| rad21                         | 2.80618e-10 | 1.00000  | 2.80618e-10 | 1.00000  |
| rad22                         | 2.19666e-10 | 1.00000  | 2.19666e-10 | 1.00000  |
| rad20                         | 1.90329e-10 | 1.00000  | 1.90329e-10 | 1.00000  |
| C2H2+PhCH2                    | 1.35136e-10 | 1.00000  | 1.35136e-10 | 1.00000  |
| rad67                         | 9.35149e-11 | 1.00000  | 9.35149e-11 | 1.00000  |
| rad45                         | 8.47398e-11 | 1.00000  | 8.47398e-11 | 1.00000  |
| rad35                         | 3.54516e-11 | 1.00000  | 3.54516e-11 | 1.00000  |
| Ph+MeAc                       | 2.30387e-11 | 1.00000  | 2.30387e-11 | 1.00000  |
| rad10                         | 1.91969e-11 | 1.00000  | 1.91969e-11 | 1.00000  |
| rad5                          | 1.47955e-11 | 1.00000  | 1.47955e-11 | 1.00000  |
| PhCCCH3+H                     | 1.43578e-11 | 1.00000  | 1.43578e-11 | 1.00000  |
| Phenyl+cycC3H4                | 8.62884e-12 | 1.00000  | 0.00000     | 1.00000  |
| Ph+Allene                     | 7.00385e-12 | 1.00000  | 7.00385e-12 | 1.00000  |
| rad3                          | 5.42715e-12 | 1.00000  | 5.42715e-12 | 1.00000  |
| rad36                         | 4.94453e-12 | 1.00000  | 4.94453e-12 | 1.00000  |
| PhCH2CCH+H                    | 4.64222e-12 | 1.00000  | 4.64222e-12 | 1.00000  |
| PhCCH+CH3                     | 4.36713e-12 | 1.00000  | 4.36713e-12 | 1.00000  |

|           |             |         |             |         |
|-----------|-------------|---------|-------------|---------|
| rad23     | 4.26766e-12 | 1.00000 | 4.26766e-12 | 1.00000 |
| rad4      | 3.49920e-12 | 1.00000 | 3.49920e-12 | 1.00000 |
| rad25     | 5.70444e-13 | 1.00000 | 5.70444e-13 | 1.00000 |
| rad24     | 3.61880e-13 | 1.00000 | 3.61880e-13 | 1.00000 |
| rad30     | 3.09145e-13 | 1.00000 | 3.09145e-13 | 1.00000 |
| rad27     | 2.91393e-13 | 1.00000 | 2.91393e-13 | 1.00000 |
| rad13     | 8.01836e-14 | 1.00000 | 8.01836e-14 | 1.00000 |
| PAH3+H    | 2.82508e-14 | 1.00000 | 2.82508e-14 | 1.00000 |
| rad37     | 2.61488e-14 | 1.00000 | 2.61488e-14 | 1.00000 |
| rad28     | 1.40842e-14 | 1.00000 | 1.40842e-14 | 1.00000 |
| PAH7+H    | 9.82886e-15 | 1.00000 | 9.82886e-15 | 1.00000 |
| rad60syn  | 7.87812e-15 | 1.00000 | 7.87812e-15 | 1.00000 |
| rad14     | 7.18664e-15 | 1.00000 | 7.18664e-15 | 1.00000 |
| rad19syn  | 5.88244e-15 | 1.00000 | 5.88244e-15 | 1.00000 |
| PAH10+CH3 | 4.96612e-15 | 1.00000 | 4.96612e-15 | 1.00000 |
| rad60anti | 4.48260e-15 | 1.00000 | 4.48260e-15 | 1.00000 |
| rad59     | 3.74210e-15 | 1.00000 | 3.74210e-15 | 1.00000 |
| rad38     | 1.42117e-15 | 1.00000 | 1.42117e-15 | 1.00000 |
| rad33     | 6.68928e-16 | 1.00000 | 6.68928e-16 | 1.00000 |
| rad43     | 3.15935e-16 | 1.00000 | 3.15935e-16 | 1.00000 |
| rad70     | 1.05479e-16 | 1.00000 | 1.05479e-16 | 1.00000 |
| PAH9+H    | 7.65072e-17 | 1.00000 | 7.65072e-17 | 1.00000 |
| rad46     | 6.03448e-17 | 1.00000 | 6.03448e-17 | 1.00000 |
| rad58     | 5.41051e-17 | 1.00000 | 5.41051e-17 | 1.00000 |
| PAH1+H    | 2.76296e-17 | 1.00000 | 2.76296e-17 | 1.00000 |
| rad34     | 1.41591e-17 | 1.00000 | 1.41591e-17 | 1.00000 |
| rad39     | 1.23807e-17 | 1.00000 | 1.23807e-17 | 1.00000 |
| rad50     | 1.14331e-17 | 1.00000 | 1.14331e-17 | 1.00000 |
| rad62     | 1.00227e-17 | 1.00000 | 1.00227e-17 | 1.00000 |
| rad41     | 5.15605e-18 | 1.00000 | 5.15605e-18 | 1.00000 |
| rad31     | 3.81664e-18 | 1.00000 | 3.81664e-18 | 1.00000 |
| rad54     | 1.93945e-18 | 1.00000 | 1.93945e-18 | 1.00000 |
| rad51     | 1.02295e-18 | 1.00000 | 1.02295e-18 | 1.00000 |
| rad52     | 5.49804e-19 | 1.00000 | 5.49804e-19 | 1.00000 |
| rad61     | 5.44660e-19 | 1.00000 | 5.44660e-19 | 1.00000 |
| rad42     | 2.45500e-19 | 1.00000 | 2.45500e-19 | 1.00000 |
| PAH8+H    | 1.45894e-19 | 1.00000 | 1.45894e-19 | 1.00000 |
| rad68syn  | 1.15450e-19 | 1.00000 | 1.15450e-19 | 1.00000 |
| rad55     | 9.81856e-20 | 1.00000 | 9.81856e-20 | 1.00000 |
| rad68anti | 7.74387e-20 | 1.00000 | 7.74387e-20 | 1.00000 |
| rad40syn  | 4.92463e-20 | 1.00000 | 4.92463e-20 | 1.00000 |
| rad40anti | 3.95443e-20 | 1.00000 | 3.95443e-20 | 1.00000 |
| rad53     | 6.29316e-21 | 1.00000 | 6.29316e-21 | 1.00000 |
| rad65     | 4.69690e-21 | 1.00000 | 4.69690e-21 | 1.00000 |
| rad56     | 2.96136e-21 | 1.00000 | 2.96136e-21 | 1.00000 |
| rad47     | 2.52851e-21 | 1.00000 | 2.52851e-21 | 1.00000 |
| rad73     | 1.14785e-21 | 1.00000 | 1.14785e-21 | 1.00000 |
| rad71     | 6.63104e-22 | 1.00000 | 6.63104e-22 | 1.00000 |
| rad64     | 4.78783e-22 | 1.00000 | 4.78783e-22 | 1.00000 |
| rad72     | 2.79964e-24 | 1.00000 | 2.79964e-24 | 1.00000 |

10000000.0 Pa, 310.000000 K

=====

| Rate constant             | True (fraction)        | Effective (fraction)   |
|---------------------------|------------------------|------------------------|
| Total                     | 5.92544e-14 (1.00 )    | 5.92544e-14 (1.00 )    |
| Formation of rad19        | 5.91462e-14 (0.998 )   | 5.91462e-14 (0.998 )   |
| H-abstraction to cyc2enyl | 1.07628e-16 (0.00182 ) | 1.07628e-16 (0.00182 ) |
| H-abstraction to cyclenyl | 5.62537e-19 (9.49e-06) | 5.62537e-19 (9.49e-06) |

| species                       | PYtrue      | Cumul    | PYeffective | Cumul    |
|-------------------------------|-------------|----------|-------------|----------|
| rad19anti                     | 0.533017    | 0.533017 | 0.533017    | 0.533017 |
| rad9                          | 0.464946    | 0.997963 | 0.464946    | 0.997963 |
| Benzene+cycloprop-2-enylidene | 0.00181637  | 0.999779 | 0.00181637  | 0.999779 |
| rad15                         | 0.000202510 | 0.999981 | 0.000202510 | 0.999981 |
| Benzene+cycloprop-1-enylidene | 9.49359e-06 | 0.999991 | 9.49359e-06 | 0.999991 |
| rad12                         | 4.69445e-06 | 0.999996 | 4.69445e-06 | 0.999996 |
| rad8                          | 2.30679e-06 | 0.999998 | 2.30679e-06 | 0.999998 |
| Indene+H                      | 1.91702e-06 | 1.000000 | 1.91702e-06 | 1.000000 |
| PhCHCCH2+H                    | 1.16998e-08 | 1.000000 | 1.16998e-08 | 1.000000 |
| rad7                          | 9.67127e-10 | 1.000000 | 9.67127e-10 | 1.000000 |
| rad11                         | 6.63086e-10 | 1.000000 | 6.63086e-10 | 1.000000 |
| rad2                          | 5.21269e-10 | 1.000000 | 5.21269e-10 | 1.000000 |
| PhcycC3H3_A+H                 | 3.49101e-10 | 1.000000 | 3.49101e-10 | 1.000000 |
| rad1                          | 7.17300e-11 | 1.000000 | 7.17300e-11 | 1.000000 |
| rad26                         | 6.13252e-11 | 1.000000 | 6.13252e-11 | 1.000000 |
| rad18                         | 5.97056e-11 | 1.000000 | 5.97056e-11 | 1.000000 |
| rad21                         | 4.40065e-11 | 1.000000 | 4.40065e-11 | 1.000000 |
| rad6                          | 2.75676e-11 | 1.000000 | 2.75676e-11 | 1.000000 |



|                |             |          |             |          |
|----------------|-------------|----------|-------------|----------|
| PhcycC3H3_B+H  | 2.14561e-11 | 1.000000 | 2.14561e-11 | 1.000000 |
| rad20          | 1.90504e-11 | 1.000000 | 1.90504e-11 | 1.000000 |
| Phenyl+cycC3H4 | 1.08073e-11 | 1.000000 | 0.000000    | 1.000000 |
| rad22          | 9.97119e-12 | 1.000000 | 9.97119e-12 | 1.000000 |
| rad45          | 3.03272e-12 | 1.000000 | 3.03272e-12 | 1.000000 |
| rad67          | 2.63459e-12 | 1.000000 | 2.63459e-12 | 1.000000 |
| rad5           | 1.48980e-12 | 1.000000 | 1.48980e-12 | 1.000000 |
| C2H2+PhCH2     | 1.14136e-12 | 1.000000 | 1.14136e-12 | 1.000000 |
| rad35          | 1.08753e-12 | 1.000000 | 1.08753e-12 | 1.000000 |
| rad10          | 3.60704e-13 | 1.000000 | 3.60704e-13 | 1.000000 |
| rad36          | 3.12048e-13 | 1.000000 | 3.12048e-13 | 1.000000 |
| rad3           | 1.11026e-13 | 1.000000 | 1.11026e-13 | 1.000000 |
| Ph+MeAc        | 9.38749e-14 | 1.000000 | 9.38749e-14 | 1.000000 |
| PhCCCH3+H      | 8.72756e-14 | 1.000000 | 8.72756e-14 | 1.000000 |
| rad4           | 7.22756e-14 | 1.000000 | 7.22756e-14 | 1.000000 |
| rad24          | 5.97577e-14 | 1.000000 | 5.97577e-14 | 1.000000 |
| Ph+Allene      | 3.21178e-14 | 1.000000 | 3.21178e-14 | 1.000000 |
| rad23          | 2.54196e-14 | 1.000000 | 2.54196e-14 | 1.000000 |
| rad25          | 1.29124e-14 | 1.000000 | 1.29124e-14 | 1.000000 |
| PhCH2CCH+H     | 1.00311e-14 | 1.000000 | 1.00311e-14 | 1.000000 |
| rad27          | 7.00729e-15 | 1.000000 | 7.00729e-15 | 1.000000 |
| PhCCH+CH3      | 6.87442e-15 | 1.000000 | 6.87442e-15 | 1.000000 |
| rad30          | 1.77953e-15 | 1.000000 | 1.77953e-15 | 1.000000 |
| rad13          | 1.59884e-15 | 1.000000 | 1.59884e-15 | 1.000000 |
| rad37          | 5.70170e-17 | 1.000000 | 5.70170e-17 | 1.000000 |
| rad28          | 2.78168e-17 | 1.000000 | 2.78168e-17 | 1.000000 |
| rad33          | 2.19694e-17 | 1.000000 | 2.19694e-17 | 1.000000 |
| PAH3+H         | 1.70225e-17 | 1.000000 | 1.70225e-17 | 1.000000 |
| rad60syn       | 1.58412e-17 | 1.000000 | 1.58412e-17 | 1.000000 |
| rad14          | 1.31478e-17 | 1.000000 | 1.31478e-17 | 1.000000 |
| rad19syn       | 1.03678e-17 | 1.000000 | 1.03678e-17 | 1.000000 |
| rad60anti      | 8.27634e-18 | 1.000000 | 8.27634e-18 | 1.000000 |
| PAH7+H         | 5.46724e-18 | 1.000000 | 5.46724e-18 | 1.000000 |
| rad59          | 2.97165e-18 | 1.000000 | 2.97165e-18 | 1.000000 |
| PAH10+CH3      | 1.04499e-18 | 1.000000 | 1.04499e-18 | 1.000000 |
| rad38          | 8.18675e-19 | 1.000000 | 8.18675e-19 | 1.000000 |
| rad31          | 3.82155e-19 | 1.000000 | 3.82155e-19 | 1.000000 |
| rad43          | 2.61003e-20 | 1.000000 | 2.61003e-20 | 1.000000 |
| rad46          | 1.62380e-20 | 1.000000 | 1.62380e-20 | 1.000000 |
| rad58          | 4.64017e-21 | 1.000000 | 4.64017e-21 | 1.000000 |
| rad70          | 4.35563e-21 | 1.000000 | 4.35563e-21 | 1.000000 |
| PAH9+H         | 1.47845e-21 | 1.000000 | 1.47845e-21 | 1.000000 |
| PAH1+H         | 9.98384e-22 | 1.000000 | 9.98384e-22 | 1.000000 |
| rad50          | 4.67099e-22 | 1.000000 | 4.67099e-22 | 1.000000 |
| rad34          | 2.40194e-22 | 1.000000 | 2.40194e-22 | 1.000000 |
| rad39          | 1.34664e-22 | 1.000000 | 1.34664e-22 | 1.000000 |
| rad41          | 4.39990e-23 | 1.000000 | 4.39990e-23 | 1.000000 |
| rad62          | 3.74725e-23 | 1.000000 | 3.74725e-23 | 1.000000 |
| rad54          | 1.43845e-23 | 1.000000 | 1.43845e-23 | 1.000000 |
| rad52          | 8.15384e-24 | 1.000000 | 8.15384e-24 | 1.000000 |
| rad51          | 6.39716e-24 | 1.000000 | 6.39716e-24 | 1.000000 |
| rad61          | 9.34343e-25 | 1.000000 | 9.34343e-25 | 1.000000 |
| rad47          | 7.80879e-25 | 1.000000 | 7.80879e-25 | 1.000000 |
| rad55          | 3.39972e-25 | 1.000000 | 3.39972e-25 | 1.000000 |
| rad42          | 1.33697e-25 | 1.000000 | 1.33697e-25 | 1.000000 |
| rad68syn       | 2.65260e-26 | 1.000000 | 2.65260e-26 | 1.000000 |
| rad68anti      | 1.90843e-26 | 1.000000 | 1.90843e-26 | 1.000000 |
| rad40syn       | 9.48981e-28 | 1.000000 | 9.48981e-28 | 1.000000 |
| rad53          | 8.12506e-28 | 1.000000 | 8.12506e-28 | 1.000000 |
| rad40anti      | 7.20108e-28 | 1.000000 | 7.20108e-28 | 1.000000 |
| rad65          | 7.00561e-28 | 1.000000 | 7.00561e-28 | 1.000000 |
| PAH8+H         | 3.81631e-28 | 1.000000 | 3.81631e-28 | 1.000000 |
| rad56          | 3.05290e-29 | 1.000000 | 3.05290e-29 | 1.000000 |
| rad64          | 3.59578e-30 | 1.000000 | 3.59578e-30 | 1.000000 |
| rad73          | 1.58643e-30 | 1.000000 | 1.58643e-30 | 1.000000 |
| rad71          | 3.73131e-32 | 1.000000 | 3.73131e-32 | 1.000000 |

10000000.0 Pa, 400.000000 K

| Rate constant             | True (fraction)        | Effective (fraction)   |
|---------------------------|------------------------|------------------------|
| Total                     | 1.29463e-13 (1.00 )    | 1.29463e-13 (1.00 )    |
| Formation of rad19        | 1.28526e-13 (0.993 )   | 1.28526e-13 (0.993 )   |
| H-abstraction to cyc2enyl | 9.19357e-16 (0.00710 ) | 9.19357e-16 (0.00710 ) |
| H-abstraction to cyclenyl | 1.69485e-17 (0.000131) | 1.69485e-17 (0.000131) |

  

| species   | PYtrue   | Cumul    | PYeffective | Cumul    |
|-----------|----------|----------|-------------|----------|
| rad9      | 0.773622 | 0.773622 | 0.773622    | 0.773622 |
| rad19anti | 0.217103 | 0.990726 | 0.217103    | 0.990726 |

|                               |             |          |             |          |
|-------------------------------|-------------|----------|-------------|----------|
| Benzene+cycloprop-2-enylidene | 0.00710133  | 0.997827 | 0.00710133  | 0.997827 |
| rad15                         | 0.00170449  | 0.999531 | 0.00170449  | 0.999531 |
| Indene+H                      | 0.000316068 | 0.999848 | 0.000316068 | 0.999848 |
| Benzene+cycloprop-1-enylidene | 0.000130914 | 0.999978 | 0.000130914 | 0.999978 |
| PhCHCCH2+H                    | 1.05414e-05 | 0.999989 | 1.05414e-05 | 0.999989 |
| rad12                         | 7.14669e-06 | 0.999996 | 7.14669e-06 | 0.999996 |
| PhcycC3H3_A+H                 | 1.40155e-06 | 0.999998 | 1.40155e-06 | 0.999998 |
| PhcycC3H3_B+H                 | 6.72051e-07 | 0.999998 | 6.72051e-07 | 0.999998 |
| rad8                          | 5.63492e-07 | 0.999999 | 5.63492e-07 | 0.999999 |
| rad11                         | 4.24329e-07 | 0.999999 | 4.24329e-07 | 0.999999 |
| rad2                          | 3.91287e-07 | 1.000000 | 3.91287e-07 | 1.000000 |
| rad6                          | 2.54529e-07 | 1.000000 | 2.54529e-07 | 1.000000 |
| C2H2+PhCH2                    | 1.63806e-07 | 1.000000 | 1.63806e-07 | 1.000000 |
| Ph+MeAc                       | 1.08024e-07 | 1.000000 | 1.08024e-07 | 1.000000 |
| rad26                         | 8.20395e-08 | 1.000000 | 8.20395e-08 | 1.000000 |
| rad67                         | 6.94915e-08 | 1.000000 | 6.94915e-08 | 1.000000 |
| rad1                          | 6.10900e-08 | 1.000000 | 6.10900e-08 | 1.000000 |
| rad22                         | 6.02600e-08 | 1.000000 | 6.02600e-08 | 1.000000 |
| PhCCCH3+H                     | 5.16287e-08 | 1.000000 | 5.16287e-08 | 1.000000 |
| rad45                         | 4.67705e-08 | 1.000000 | 4.67705e-08 | 1.000000 |
| Ph+Allene                     | 3.65755e-08 | 1.000000 | 3.65755e-08 | 1.000000 |
| rad18                         | 3.30811e-08 | 1.000000 | 3.30811e-08 | 1.000000 |
| PhCH2CCH+H                    | 3.24254e-08 | 1.000000 | 3.24254e-08 | 1.000000 |
| rad35                         | 2.51259e-08 | 1.000000 | 2.51259e-08 | 1.000000 |
| PhCCH+CH3                     | 2.41648e-08 | 1.000000 | 2.41648e-08 | 1.000000 |
| rad10                         | 2.31053e-08 | 1.000000 | 2.31053e-08 | 1.000000 |
| rad21                         | 1.41638e-08 | 1.000000 | 1.41638e-08 | 1.000000 |
| rad23                         | 1.36001e-08 | 1.000000 | 1.36001e-08 | 1.000000 |
| rad20                         | 1.30535e-08 | 1.000000 | 1.30535e-08 | 1.000000 |
| rad7                          | 5.02441e-09 | 1.000000 | 5.02441e-09 | 1.000000 |
| rad5                          | 3.70995e-09 | 1.000000 | 3.70995e-09 | 1.000000 |
| rad36                         | 2.66680e-09 | 1.000000 | 2.66680e-09 | 1.000000 |
| rad3                          | 2.30727e-09 | 1.000000 | 2.30727e-09 | 1.000000 |
| rad4                          | 1.54929e-09 | 1.000000 | 1.54929e-09 | 1.000000 |
| rad30                         | 6.46024e-10 | 1.000000 | 6.46024e-10 | 1.000000 |
| rad37                         | 3.36185e-10 | 1.000000 | 3.36185e-10 | 1.000000 |
| PAH3+H                        | 2.63173e-10 | 1.000000 | 2.63173e-10 | 1.000000 |
| Phenyl+cycC3H4                | 2.55189e-10 | 1.000000 | 0.000000    | 1.000000 |
| PAH10+CH3                     | 2.52808e-10 | 1.000000 | 2.52808e-10 | 1.000000 |
| rad25                         | 1.87365e-10 | 1.000000 | 1.87365e-10 | 1.000000 |
| rad28                         | 1.63447e-10 | 1.000000 | 1.63447e-10 | 1.000000 |
| PAH7+H                        | 1.46024e-10 | 1.000000 | 1.46024e-10 | 1.000000 |
| rad19syn                      | 1.26767e-10 | 1.000000 | 1.26767e-10 | 1.000000 |
| rad27                         | 9.29560e-11 | 1.000000 | 9.29560e-11 | 1.000000 |
| rad13                         | 7.28516e-11 | 1.000000 | 7.28516e-11 | 1.000000 |
| rad38                         | 5.36988e-11 | 1.000000 | 5.36988e-11 | 1.000000 |
| rad60syn                      | 3.60531e-11 | 1.000000 | 3.60531e-11 | 1.000000 |
| rad59                         | 2.94989e-11 | 1.000000 | 2.94989e-11 | 1.000000 |
| PAH9+H                        | 2.65744e-11 | 1.000000 | 2.65744e-11 | 1.000000 |
| rad60anti                     | 2.16273e-11 | 1.000000 | 2.16273e-11 | 1.000000 |
| rad24                         | 1.68004e-11 | 1.000000 | 1.68004e-11 | 1.000000 |
| rad14                         | 8.67191e-12 | 1.000000 | 8.67191e-12 | 1.000000 |
| rad43                         | 7.78173e-12 | 1.000000 | 7.78173e-12 | 1.000000 |
| rad46                         | 6.09192e-12 | 1.000000 | 6.09192e-12 | 1.000000 |
| rad39                         | 5.30526e-12 | 1.000000 | 5.30526e-12 | 1.000000 |
| rad50                         | 4.05954e-12 | 1.000000 | 4.05954e-12 | 1.000000 |
| rad70                         | 3.88851e-12 | 1.000000 | 3.88851e-12 | 1.000000 |
| PAH1+H                        | 2.95841e-12 | 1.000000 | 2.95841e-12 | 1.000000 |
| rad58                         | 1.36429e-12 | 1.000000 | 1.36429e-12 | 1.000000 |
| rad51                         | 9.68325e-13 | 1.000000 | 9.68325e-13 | 1.000000 |
| rad34                         | 7.54759e-13 | 1.000000 | 7.54759e-13 | 1.000000 |
| rad33                         | 6.56998e-13 | 1.000000 | 6.56998e-13 | 1.000000 |
| rad54                         | 5.29087e-13 | 1.000000 | 5.29087e-13 | 1.000000 |
| rad62                         | 3.70831e-13 | 1.000000 | 3.70831e-13 | 1.000000 |
| rad52                         | 3.19233e-13 | 1.000000 | 3.19233e-13 | 1.000000 |
| rad41                         | 2.97811e-13 | 1.000000 | 2.97811e-13 | 1.000000 |
| rad61                         | 1.62156e-13 | 1.000000 | 1.62156e-13 | 1.000000 |
| PAH8+H                        | 6.86350e-14 | 1.000000 | 6.86350e-14 | 1.000000 |
| rad55                         | 3.47376e-14 | 1.000000 | 3.47376e-14 | 1.000000 |
| rad68syn                      | 2.28457e-14 | 1.000000 | 2.28457e-14 | 1.000000 |
| rad71                         | 1.81662e-14 | 1.000000 | 1.81662e-14 | 1.000000 |
| rad65                         | 1.76419e-14 | 1.000000 | 1.76419e-14 | 1.000000 |
| rad42                         | 1.69638e-14 | 1.000000 | 1.69638e-14 | 1.000000 |
| rad68anti                     | 1.50550e-14 | 1.000000 | 1.50550e-14 | 1.000000 |
| rad40syn                      | 1.48820e-14 | 1.000000 | 1.48820e-14 | 1.000000 |
| rad73                         | 1.47879e-14 | 1.000000 | 1.47879e-14 | 1.000000 |
| rad40anti                     | 1.20157e-14 | 1.000000 | 1.20157e-14 | 1.000000 |
| rad53                         | 5.98797e-15 | 1.000000 | 5.98797e-15 | 1.000000 |
| rad56                         | 4.86885e-15 | 1.000000 | 4.86885e-15 | 1.000000 |
| rad31                         | 4.41704e-15 | 1.000000 | 4.41704e-15 | 1.000000 |

|       |             |         |             |         |
|-------|-------------|---------|-------------|---------|
| rad64 | 2.00372e-15 | 1.00000 | 2.00372e-15 | 1.00000 |
| rad72 | 4.76900e-16 | 1.00000 | 4.76900e-16 | 1.00000 |
| rad47 | 1.23055e-16 | 1.00000 | 1.23055e-16 | 1.00000 |

10000000.0 Pa, 500.000000 K

| Rate constant             | True (fraction)        | Effective (fraction)   |
|---------------------------|------------------------|------------------------|
| Total                     | 2.52837e-13 (1.00 )    | 2.52837e-13 (1.00 )    |
| Formation of rad19        | 2.47941e-13 (0.981 )   | 2.47941e-13 (0.981 )   |
| H-abstraction to cyc2enyl | 4.69058e-15 (0.0186 )  | 4.69058e-15 (0.0186 )  |
| H-abstraction to cyc1enyl | 2.05381e-16 (0.000812) | 2.05381e-16 (0.000812) |

| species                       | PYtrue      | Cumul    | PYeffective | Cumul    |
|-------------------------------|-------------|----------|-------------|----------|
| rad9                          | 0.923690    | 0.923690 | 0.923690    | 0.923690 |
| rad19anti                     | 0.0424678   | 0.966158 | 0.0424678   | 0.966158 |
| Benzene+cycloprop-2-enylidene | 0.0185518   | 0.984710 | 0.0185518   | 0.984710 |
| Indene+H                      | 0.00797187  | 0.992682 | 0.00797187  | 0.992682 |
| rad15                         | 0.00464362  | 0.997325 | 0.00464362  | 0.997325 |
| PhCHCCH2+H                    | 0.00138643  | 0.998712 | 0.00138643  | 0.998712 |
| Benzene+cycloprop-1-enylidene | 0.000812306 | 0.999524 | 0.000812306 | 0.999524 |
| PhcycC3H3_A+H                 | 0.000112634 | 0.999637 | 0.000112634 | 0.999637 |
| PhcycC3H3_B+H                 | 9.58549e-05 | 0.999733 | 9.58549e-05 | 0.999733 |
| C2H2+PhCH2                    | 4.06321e-05 | 0.999773 | 4.06321e-05 | 0.999773 |
| Ph+MeAc                       | 4.06168e-05 | 0.999814 | 4.06168e-05 | 0.999814 |
| rad6                          | 3.56991e-05 | 0.999850 | 3.56991e-05 | 0.999850 |
| Ph+Allene                     | 2.33662e-05 | 0.999873 | 2.33662e-05 | 0.999873 |
| PhCH2CCH+H                    | 2.29893e-05 | 0.999896 | 2.29893e-05 | 0.999896 |
| rad67                         | 1.66025e-05 | 0.999913 | 1.66025e-05 | 0.999913 |
| PhCCCH3+H                     | 1.62668e-05 | 0.999929 | 1.62668e-05 | 0.999929 |
| rad12                         | 1.16850e-05 | 0.999941 | 1.16850e-05 | 0.999941 |
| PhCCH+CH3                     | 8.80078e-06 | 0.999949 | 8.80078e-06 | 0.999949 |
| rad2                          | 8.74163e-06 | 0.999958 | 8.74163e-06 | 0.999958 |
| rad11                         | 8.64645e-06 | 0.999967 | 8.64645e-06 | 0.999967 |
| rad45                         | 7.25879e-06 | 0.999974 | 7.25879e-06 | 0.999974 |
| rad26                         | 6.52650e-06 | 0.999981 | 6.52650e-06 | 0.999981 |
| rad35                         | 5.94386e-06 | 0.999986 | 5.94386e-06 | 0.999986 |
| rad23                         | 3.12291e-06 | 0.999990 | 3.12291e-06 | 0.999990 |
| rad10                         | 2.21410e-06 | 0.999992 | 2.21410e-06 | 0.999992 |
| rad22                         | 1.78793e-06 | 0.999994 | 1.78793e-06 | 0.999994 |
| rad1                          | 1.67131e-06 | 0.999995 | 1.67131e-06 | 0.999995 |
| PAH10+CH3                     | 9.33755e-07 | 0.999996 | 9.33755e-07 | 0.999996 |
| rad37                         | 5.57036e-07 | 0.999997 | 5.57036e-07 | 0.999997 |
| rad36                         | 4.45839e-07 | 0.999997 | 4.45839e-07 | 0.999997 |
| rad19syn                      | 3.14785e-07 | 0.999998 | 3.14785e-07 | 0.999998 |
| rad7                          | 3.04137e-07 | 0.999998 | 3.04137e-07 | 0.999998 |
| rad18                         | 2.95127e-07 | 0.999998 | 2.95127e-07 | 0.999998 |
| PAH7+H                        | 2.94966e-07 | 0.999998 | 2.94966e-07 | 0.999998 |
| PAH3+H                        | 2.89593e-07 | 0.999999 | 2.89593e-07 | 0.999999 |
| rad8                          | 2.49303e-07 | 0.999999 | 2.49303e-07 | 0.999999 |
| rad30                         | 2.32798e-07 | 0.999999 | 2.32798e-07 | 0.999999 |
| rad38                         | 1.81865e-07 | 0.999999 | 1.81865e-07 | 0.999999 |
| rad21                         | 1.78786e-07 | 1.000000 | 1.78786e-07 | 1.000000 |
| PAH9+H                        | 1.76599e-07 | 1.000000 | 1.76599e-07 | 1.000000 |
| rad20                         | 1.64680e-07 | 1.000000 | 1.64680e-07 | 1.000000 |
| rad28                         | 1.12032e-07 | 1.000000 | 1.12032e-07 | 1.000000 |
| rad5                          | 7.62595e-08 | 1.000000 | 7.62595e-08 | 1.000000 |
| rad3                          | 6.67370e-08 | 1.000000 | 6.67370e-08 | 1.000000 |
| rad4                          | 4.67502e-08 | 1.000000 | 4.67502e-08 | 1.000000 |
| rad39                         | 4.09944e-08 | 1.000000 | 4.09944e-08 | 1.000000 |
| rad50                         | 3.54223e-08 | 1.000000 | 3.54223e-08 | 1.000000 |
| rad46                         | 3.26606e-08 | 1.000000 | 3.26606e-08 | 1.000000 |
| rad59                         | 2.80756e-08 | 1.000000 | 2.80756e-08 | 1.000000 |
| rad60syn                      | 2.35597e-08 | 1.000000 | 2.35597e-08 | 1.000000 |
| PAH1+H                        | 1.59631e-08 | 1.000000 | 1.59631e-08 | 1.000000 |
| rad60anti                     | 1.46792e-08 | 1.000000 | 1.46792e-08 | 1.000000 |
| rad51                         | 1.13554e-08 | 1.000000 | 1.13554e-08 | 1.000000 |
| rad13                         | 8.48036e-09 | 1.000000 | 8.48036e-09 | 1.000000 |
| rad43                         | 7.61841e-09 | 1.000000 | 7.61841e-09 | 1.000000 |
| Phenyl+cycC3H4                | 7.60657e-09 | 1.000000 | 0.000000    | 1.000000 |
| rad70                         | 6.48838e-09 | 1.000000 | 6.48838e-09 | 1.000000 |
| rad25                         | 4.89083e-09 | 1.000000 | 4.89083e-09 | 1.000000 |
| rad54                         | 3.95466e-09 | 1.000000 | 3.95466e-09 | 1.000000 |
| rad52                         | 3.21840e-09 | 1.000000 | 3.21840e-09 | 1.000000 |
| rad58                         | 2.84816e-09 | 1.000000 | 2.84816e-09 | 1.000000 |
| rad27                         | 2.26333e-09 | 1.000000 | 2.26333e-09 | 1.000000 |
| rad34                         | 1.62194e-09 | 1.000000 | 1.62194e-09 | 1.000000 |
| rad61                         | 1.47533e-09 | 1.000000 | 1.47533e-09 | 1.000000 |
| PAH8+H                        | 5.42173e-10 | 1.000000 | 5.42173e-10 | 1.000000 |

|           |             |         |             |         |
|-----------|-------------|---------|-------------|---------|
| rad41     | 5.30998e-10 | 1.00000 | 5.30998e-10 | 1.00000 |
| rad71     | 4.23036e-10 | 1.00000 | 4.23036e-10 | 1.00000 |
| rad62     | 3.50306e-10 | 1.00000 | 3.50306e-10 | 1.00000 |
| rad73     | 3.03167e-10 | 1.00000 | 3.03167e-10 | 1.00000 |
| rad14     | 3.00808e-10 | 1.00000 | 3.00808e-10 | 1.00000 |
| rad55     | 2.99117e-10 | 1.00000 | 2.99117e-10 | 1.00000 |
| rad65     | 2.72235e-10 | 1.00000 | 2.72235e-10 | 1.00000 |
| rad24     | 2.70292e-10 | 1.00000 | 2.70292e-10 | 1.00000 |
| rad68syn  | 1.11616e-10 | 1.00000 | 1.11616e-10 | 1.00000 |
| rad56     | 9.45956e-11 | 1.00000 | 9.45956e-11 | 1.00000 |
| rad33     | 9.05057e-11 | 1.00000 | 9.05057e-11 | 1.00000 |
| rad53     | 8.88153e-11 | 1.00000 | 8.88153e-11 | 1.00000 |
| rad40syn  | 8.73762e-11 | 1.00000 | 8.73762e-11 | 1.00000 |
| rad68anti | 7.27496e-11 | 1.00000 | 7.27496e-11 | 1.00000 |
| rad40anti | 7.01233e-11 | 1.00000 | 7.01233e-11 | 1.00000 |
| rad64     | 4.41789e-11 | 1.00000 | 4.41789e-11 | 1.00000 |
| rad42     | 2.68656e-11 | 1.00000 | 2.68656e-11 | 1.00000 |
| rad72     | 1.40656e-11 | 1.00000 | 1.40656e-11 | 1.00000 |
| rad47     | 6.69628e-12 | 1.00000 | 6.69628e-12 | 1.00000 |
| rad31     | 3.72012e-12 | 1.00000 | 3.72012e-12 | 1.00000 |

10000000.0 Pa, 600.000000 K

| Rate constant             | True (fraction)        | Effective (fraction)   |
|---------------------------|------------------------|------------------------|
| Total                     | 4.35570e-13 (1.00 )    | 4.35570e-13 (1.00 )    |
| Formation of rad19        | 4.18892e-13 (0.962 )   | 4.18891e-13 (0.962 )   |
| H-abstraction to cyc2enyl | 1.54751e-14 (0.0355 )  | 1.54751e-14 (0.0355 )  |
| H-abstraction to cyclenyl | 1.20343e-15 (0.00276 ) | 1.20343e-15 (0.00276 ) |

| species                       | PYtrue      | Cumul    | PYeffective | Cumul    |
|-------------------------------|-------------|----------|-------------|----------|
| rad9                          | 0.826761    | 0.826761 | 0.826762    | 0.826762 |
| Indene+H                      | 0.0718784   | 0.898639 | 0.0718785   | 0.898640 |
| Benzene+cycloprop-2-enylidene | 0.0355285   | 0.934168 | 0.0355285   | 0.934169 |
| PhCHCCH2+H                    | 0.0351564   | 0.969324 | 0.0351564   | 0.969325 |
| rad19anti                     | 0.0111440   | 0.980468 | 0.0111440   | 0.980469 |
| rad15                         | 0.00586041  | 0.986328 | 0.00586042  | 0.986329 |
| Benzene+cycloprop-1-enylidene | 0.00276289  | 0.989091 | 0.00276289  | 0.989092 |
| PhcycC3H3_B+H                 | 0.00217256  | 0.991264 | 0.00217256  | 0.991265 |
| PhcycC3H3_A+H                 | 0.00199829  | 0.993262 | 0.00199829  | 0.993263 |
| Ph+MeAc                       | 0.00120948  | 0.994472 | 0.00120948  | 0.994473 |
| C2H2+PhCH2                    | 0.00117021  | 0.995642 | 0.00117022  | 0.995643 |
| Ph+Allene                     | 0.000926046 | 0.996568 | 0.000926047 | 0.996569 |
| PhCH2CCH+H                    | 0.000904613 | 0.997472 | 0.000904614 | 0.997474 |
| rad67                         | 0.000487523 | 0.997960 | 0.000487523 | 0.997961 |
| rad6                          | 0.000476349 | 0.998436 | 0.000476350 | 0.998437 |
| PhCCCH3+H                     | 0.000439869 | 0.998876 | 0.000439869 | 0.998877 |
| PhCCH+CH3                     | 0.000289795 | 0.999166 | 0.000289795 | 0.999167 |
| rad45                         | 0.000197255 | 0.999363 | 0.000197255 | 0.999364 |
| rad35                         | 0.000174889 | 0.999538 | 0.000174889 | 0.999539 |
| rad26                         | 6.27863e-05 | 0.999601 | 6.27863e-05 | 0.999602 |
| PAH10+CH3                     | 6.02400e-05 | 0.999661 | 6.02401e-05 | 0.999662 |
| rad23                         | 5.66613e-05 | 0.999718 | 5.66613e-05 | 0.999719 |
| rad2                          | 4.86325e-05 | 0.999766 | 4.86326e-05 | 0.999768 |
| rad11                         | 2.96781e-05 | 0.999796 | 2.96781e-05 | 0.999797 |
| rad12                         | 2.74300e-05 | 0.999824 | 2.74299e-05 | 0.999825 |
| rad37                         | 2.68554e-05 | 0.999850 | 2.68554e-05 | 0.999852 |
| rad19syn                      | 2.05989e-05 | 0.999871 | 2.05989e-05 | 0.999872 |
| rad10                         | 1.88876e-05 | 0.999890 | 1.88876e-05 | 0.999891 |
| PAH7+H                        | 1.68291e-05 | 0.999907 | 1.68291e-05 | 0.999908 |
| PAH3+H                        | 1.48829e-05 | 0.999922 | 1.48829e-05 | 0.999923 |
| rad36                         | 1.39897e-05 | 0.999936 | 1.39897e-05 | 0.999937 |
| rad1                          | 1.04530e-05 | 0.999946 | 1.04530e-05 | 0.999947 |
| rad38                         | 8.92696e-06 | 0.999955 | 8.92697e-06 | 0.999956 |
| rad30                         | 7.80499e-06 | 0.999963 | 7.80500e-06 | 0.999964 |
| PAH9+H                        | 7.78978e-06 | 0.999971 | 7.78978e-06 | 0.999972 |
| rad22                         | 6.90162e-06 | 0.999978 | 6.90162e-06 | 0.999979 |
| rad7                          | 4.31053e-06 | 0.999982 | 4.31053e-06 | 0.999983 |
| rad39                         | 2.35243e-06 | 0.999984 | 2.35243e-06 | 0.999985 |
| rad28                         | 2.25954e-06 | 0.999986 | 2.25955e-06 | 0.999988 |
| rad50                         | 1.51749e-06 | 0.999988 | 1.51749e-06 | 0.999989 |
| rad59                         | 1.36510e-06 | 0.999989 | 1.36510e-06 | 0.999990 |
| rad46                         | 1.33578e-06 | 0.999991 | 1.33578e-06 | 0.999992 |
| PAH1+H                        | 1.20122e-06 | 0.999992 | 1.20122e-06 | 0.999993 |
| rad60syn                      | 1.00269e-06 | 0.999993 | 1.00269e-06 | 0.999994 |
| Phenyl+cycC3H4                | 7.80222e-07 | 0.999994 | 0.00000     | 0.999994 |
| rad60anti                     | 6.33584e-07 | 0.999994 | 6.33585e-07 | 0.999995 |
| rad18                         | 6.23998e-07 | 0.999995 | 6.23998e-07 | 0.999995 |
| rad21                         | 5.64217e-07 | 0.999995 | 5.64218e-07 | 0.999996 |

|           |             |          |             |          |
|-----------|-------------|----------|-------------|----------|
| rad20     | 4.96917e-07 | 0.999996 | 4.96918e-07 | 0.999996 |
| rad51     | 4.96065e-07 | 0.999996 | 4.96065e-07 | 0.999997 |
| rad3      | 4.02051e-07 | 0.999997 | 4.02051e-07 | 0.999997 |
| rad70     | 3.41457e-07 | 0.999997 | 3.41457e-07 | 0.999997 |
| rad43     | 3.36868e-07 | 0.999998 | 3.36868e-07 | 0.999998 |
| rad54     | 3.19233e-07 | 0.999998 | 3.19233e-07 | 0.999998 |
| rad4      | 2.89695e-07 | 0.999998 | 2.89695e-07 | 0.999998 |
| rad8      | 2.79962e-07 | 0.999998 | 2.79962e-07 | 0.999999 |
| rad5      | 2.08682e-07 | 0.999999 | 2.08682e-07 | 0.999999 |
| rad58     | 1.78751e-07 | 0.999999 | 1.78751e-07 | 0.999999 |
| rad52     | 1.38713e-07 | 0.999999 | 1.38713e-07 | 0.999999 |
| rad61     | 1.24914e-07 | 0.999999 | 1.24914e-07 | 0.999999 |
| rad13     | 1.09016e-07 | 0.999999 | 1.09016e-07 | 0.999999 |
| rad34     | 9.33661e-08 | 0.999999 | 9.33662e-08 | 1.000000 |
| PAH8+H    | 4.67582e-08 | 0.999999 | 4.67582e-08 | 1.000000 |
| rad41     | 2.95171e-08 | 0.999999 | 2.95170e-08 | 1.000000 |
| rad55     | 2.51492e-08 | 0.999999 | 2.51492e-08 | 1.000000 |
| rad71     | 1.76399e-08 | 0.999999 | 1.76399e-08 | 1.000000 |
| rad25     | 1.76100e-08 | 0.999999 | 1.76100e-08 | 1.000000 |
| rad62     | 1.59140e-08 | 0.999999 | 1.59140e-08 | 1.000000 |
| rad65     | 1.33426e-08 | 0.999999 | 1.33426e-08 | 1.000000 |
| rad73     | 1.27013e-08 | 0.999999 | 1.27013e-08 | 1.000000 |
| rad47     | 1.14109e-08 | 0.999999 | 1.14110e-08 | 1.000000 |
| rad56     | 9.88213e-09 | 0.999999 | 9.88223e-09 | 1.000000 |
| rad27     | 8.72699e-09 | 0.999999 | 8.72700e-09 | 1.000000 |
| rad53     | 8.67396e-09 | 0.999999 | 8.67397e-09 | 1.000000 |
| rad68syn  | 8.28955e-09 | 0.999999 | 8.28956e-09 | 1.000000 |
| rad40syn  | 6.99104e-09 | 1.000000 | 6.99104e-09 | 1.000000 |
| rad40anti | 5.63441e-09 | 1.000000 | 5.63441e-09 | 1.000000 |
| rad68anti | 5.38589e-09 | 1.000000 | 5.38590e-09 | 1.000000 |
| rad64     | 4.01670e-09 | 1.000000 | 4.01670e-09 | 1.000000 |
| rad24     | 2.68142e-09 | 1.000000 | 2.68143e-09 | 1.000000 |
| rad42     | 1.48875e-09 | 1.000000 | 1.48875e-09 | 1.000000 |
| rad33     | 1.36784e-09 | 1.000000 | 1.36784e-09 | 1.000000 |
| rad14     | 1.32176e-09 | 1.000000 | 1.32176e-09 | 1.000000 |
| rad31     | 8.95112e-10 | 1.000000 | 8.95113e-10 | 1.000000 |
| rad72     | 5.87003e-10 | 1.000000 | 5.87003e-10 | 1.000000 |

10000000.0 Pa, 700.000000 K

=====

| Rate constant             | True (fraction)        | Effective (fraction)   |
|---------------------------|------------------------|------------------------|
| Total                     | 6.91694e-13 (1.00 )    | 6.91677e-13 (1.00 )    |
| Formation of rad19        | 6.47922e-13 (0.937 )   | 6.47906e-13 (0.937 )   |
| H-abstraction to cyc2enyl | 3.91858e-14 (0.0567 )  | 3.91858e-14 (0.0567 )  |
| H-abstraction to cyclenyl | 4.58543e-15 (0.00663 ) | 4.58531e-15 (0.00663 ) |

| species                       | PYtrue      | Cumul    | PYeffective | Cumul    |
|-------------------------------|-------------|----------|-------------|----------|
| rad9                          | 0.579497    | 0.579497 | 0.579511    | 0.579511 |
| Indene+H                      | 0.180548    | 0.760045 | 0.180552    | 0.760063 |
| PhCHCCH2+H                    | 0.130886    | 0.890931 | 0.130889    | 0.890952 |
| Benzene+cycloprop-2-enylidene | 0.0566520   | 0.947583 | 0.0566533   | 0.947606 |
| Benzene+cycloprop-1-enylidene | 0.00662927  | 0.954212 | 0.00662926  | 0.954235 |
| PhcycC3H3_B+H                 | 0.00631670  | 0.960529 | 0.00631685  | 0.960552 |
| PhcycC3H3_A+H                 | 0.00551488  | 0.966044 | 0.00551502  | 0.966067 |
| Ph+MeAc                       | 0.00461347  | 0.970657 | 0.00461358  | 0.970680 |
| C2H2+PhCH2                    | 0.00448626  | 0.975144 | 0.00448637  | 0.975167 |
| rad19anti                     | 0.00444220  | 0.979586 | 0.00444231  | 0.979609 |
| rad15                         | 0.00391430  | 0.983500 | 0.00391439  | 0.983523 |
| Ph+Allene                     | 0.00390318  | 0.987403 | 0.00390326  | 0.987427 |
| PhCH2CCH+H                    | 0.00377477  | 0.991178 | 0.00377486  | 0.991201 |
| rad67                         | 0.00188443  | 0.993062 | 0.00188448  | 0.993086 |
| PhCCCH3+H                     | 0.00162504  | 0.994687 | 0.00162508  | 0.994711 |
| PhCCH+CH3                     | 0.00117175  | 0.995859 | 0.00117178  | 0.995883 |
| rad6                          | 0.00111561  | 0.996975 | 0.00111564  | 0.996998 |
| rad45                         | 0.000794994 | 0.997770 | 0.000795013 | 0.997793 |
| rad35                         | 0.000676509 | 0.998446 | 0.000676524 | 0.998470 |
| PAH10+CH3                     | 0.000286539 | 0.998733 | 0.000286546 | 0.998756 |
| rad23                         | 0.000185579 | 0.998918 | 0.000185583 | 0.998942 |
| rad2                          | 0.000144627 | 0.999063 | 0.000144630 | 0.999087 |
| rad37                         | 0.000114866 | 0.999178 | 0.000114869 | 0.999202 |
| rad26                         | 0.000112314 | 0.999290 | 0.000112317 | 0.999314 |
| rad19syn                      | 9.88501e-05 | 0.999389 | 9.88518e-05 | 0.999413 |
| rad12                         | 8.97803e-05 | 0.999479 | 8.97824e-05 | 0.999503 |
| PAH7+H                        | 7.69870e-05 | 0.999556 | 7.69888e-05 | 0.999580 |
| rad36                         | 6.96091e-05 | 0.999626 | 6.96107e-05 | 0.999649 |
| PAH3+H                        | 6.82082e-05 | 0.999694 | 6.82098e-05 | 0.999717 |
| rad38                         | 3.72659e-05 | 0.999731 | 3.72666e-05 | 0.999755 |
| rad11                         | 3.61031e-05 | 0.999767 | 3.61040e-05 | 0.999791 |

|                |             |          |             |          |
|----------------|-------------|----------|-------------|----------|
| rad10          | 3.49621e-05 | 0.999802 | 3.49629e-05 | 0.999826 |
| rad1           | 3.36859e-05 | 0.999836 | 3.36867e-05 | 0.999859 |
| rad30          | 3.13543e-05 | 0.999867 | 3.13551e-05 | 0.999891 |
| PAH9+H         | 2.96218e-05 | 0.999897 | 2.96225e-05 | 0.999920 |
| Phenyl+cycC3H4 | 2.33597e-05 | 0.999920 | 0.00000     | 0.999920 |
| rad39          | 1.03073e-05 | 0.999930 | 1.03075e-05 | 0.999931 |
| rad7           | 9.98280e-06 | 0.999940 | 9.98307e-06 | 0.999941 |
| rad22          | 8.96069e-06 | 0.999949 | 8.96090e-06 | 0.999950 |
| rad59          | 6.14959e-06 | 0.999955 | 6.14973e-06 | 0.999956 |
| PAH1+H         | 6.03378e-06 | 0.999962 | 6.03392e-06 | 0.999962 |
| rad28          | 5.55381e-06 | 0.999967 | 5.55394e-06 | 0.999967 |
| rad50          | 5.47393e-06 | 0.999973 | 5.47406e-06 | 0.999973 |
| rad46          | 4.79636e-06 | 0.999977 | 4.79647e-06 | 0.999978 |
| rad60syn       | 4.33985e-06 | 0.999982 | 4.33995e-06 | 0.999982 |
| rad60anti      | 2.75405e-06 | 0.999984 | 2.75411e-06 | 0.999985 |
| rad51          | 1.79029e-06 | 0.999986 | 1.79034e-06 | 0.999986 |
| rad54          | 1.65728e-06 | 0.999988 | 1.65732e-06 | 0.999988 |
| rad70          | 1.55608e-06 | 0.999989 | 1.55611e-06 | 0.999990 |
| rad43          | 1.43777e-06 | 0.999991 | 1.43781e-06 | 0.999991 |
| rad3           | 1.03073e-06 | 0.999992 | 1.03075e-06 | 0.999992 |
| rad21          | 8.84743e-07 | 0.999993 | 8.84764e-07 | 0.999993 |
| rad58          | 8.68588e-07 | 0.999994 | 8.68609e-07 | 0.999994 |
| rad8           | 7.85490e-07 | 0.999994 | 7.85509e-07 | 0.999995 |
| rad4           | 7.78880e-07 | 0.999995 | 7.78897e-07 | 0.999995 |
| rad20          | 6.92991e-07 | 0.999996 | 6.93007e-07 | 0.999996 |
| rad61          | 6.51569e-07 | 0.999997 | 6.51585e-07 | 0.999997 |
| rad18          | 6.02868e-07 | 0.999997 | 6.02883e-07 | 0.999997 |
| rad52          | 4.99500e-07 | 0.999998 | 4.99512e-07 | 0.999998 |
| rad34          | 4.37647e-07 | 0.999998 | 4.37657e-07 | 0.999998 |
| rad13          | 2.75121e-07 | 0.999998 | 2.75127e-07 | 0.999999 |
| PAH8+H         | 2.44933e-07 | 0.999999 | 2.44938e-07 | 0.999999 |
| rad5           | 1.95515e-07 | 0.999999 | 1.95519e-07 | 0.999999 |
| rad47          | 1.68855e-07 | 0.999999 | 1.68859e-07 | 0.999999 |
| rad41          | 1.34377e-07 | 0.999999 | 1.34381e-07 | 0.999999 |
| rad55          | 1.32432e-07 | 0.999999 | 1.32436e-07 | 1.000000 |
| rad62          | 6.92365e-08 | 0.999999 | 6.92381e-08 | 1.000000 |
| rad71          | 5.80538e-08 | 0.999999 | 5.80551e-08 | 1.000000 |
| rad56          | 5.61252e-08 | 0.999999 | 5.61265e-08 | 1.000000 |
| rad65          | 5.24588e-08 | 0.999999 | 5.24600e-08 | 1.000000 |
| rad53          | 4.81310e-08 | 1.000000 | 4.81322e-08 | 1.000000 |
| rad68syn       | 4.20020e-08 | 1.000000 | 4.20030e-08 | 1.000000 |
| rad73          | 4.19787e-08 | 1.000000 | 4.19796e-08 | 1.000000 |
| rad40syn       | 3.56901e-08 | 1.000000 | 3.56910e-08 | 1.000000 |
| rad31          | 3.51509e-08 | 1.000000 | 3.51518e-08 | 1.000000 |
| rad40anti      | 2.87057e-08 | 1.000000 | 2.87064e-08 | 1.000000 |
| rad68anti      | 2.72632e-08 | 1.000000 | 2.72638e-08 | 1.000000 |
| rad24          | 2.46612e-08 | 1.000000 | 2.46617e-08 | 1.000000 |
| rad25          | 2.30554e-08 | 1.000000 | 2.30559e-08 | 1.000000 |
| rad64          | 2.14414e-08 | 1.000000 | 2.14419e-08 | 1.000000 |
| rad27          | 1.64814e-08 | 1.000000 | 1.64817e-08 | 1.000000 |
| rad42          | 6.82493e-09 | 1.000000 | 6.82509e-09 | 1.000000 |
| rad33          | 5.11373e-09 | 1.000000 | 5.11386e-09 | 1.000000 |
| rad14          | 2.57215e-09 | 1.000000 | 2.57222e-09 | 1.000000 |
| rad72          | 1.93780e-09 | 1.000000 | 1.93784e-09 | 1.000000 |

10000000.0 Pa, 800.000000 K

| Rate constant             | True (fraction)       | Effective (fraction)  |
|---------------------------|-----------------------|-----------------------|
| Total                     | 1.03759e-12 (1.00 )   | 1.03750e-12 (1.00 )   |
| Formation of rad19        | 9.41065e-13 (0.907 )  | 9.40982e-13 (0.907 )  |
| H-abstraction to cyc2enyl | 8.32953e-14 (0.0803 ) | 8.32953e-14 (0.0803 ) |
| H-abstraction to cyclenyl | 1.32261e-14 (0.0127 ) | 1.32249e-14 (0.0127 ) |

  

| species                       | PYtrue     | Cumul    | PYeffective | Cumul    |
|-------------------------------|------------|----------|-------------|----------|
| rad9                          | 0.489123   | 0.489123 | 0.489163    | 0.489163 |
| Indene+H                      | 0.196848   | 0.685972 | 0.196864    | 0.686027 |
| PhCHCCH2+H                    | 0.167210   | 0.853181 | 0.167223    | 0.853250 |
| Benzene+cycloprop-2-enylidene | 0.0802780  | 0.933459 | 0.0802845   | 0.933534 |
| Benzene+cycloprop-1-enylidene | 0.0127470  | 0.946206 | 0.0127469   | 0.946281 |
| PhcycC3H3_B+H                 | 0.00824331 | 0.954450 | 0.00824397  | 0.954525 |
| PhcycC3H3_A+H                 | 0.00708552 | 0.961535 | 0.00708609  | 0.961611 |
| Ph+MeAc                       | 0.00590125 | 0.967436 | 0.00590173  | 0.967513 |
| C2H2+PhCH2                    | 0.00579047 | 0.973227 | 0.00579094  | 0.973304 |
| Ph+Allene                     | 0.00520886 | 0.978436 | 0.00520928  | 0.978513 |
| PhCH2CCH+H                    | 0.00501199 | 0.983448 | 0.00501239  | 0.983526 |
| rad19anti                     | 0.00327524 | 0.986723 | 0.00327551  | 0.986801 |
| rad67                         | 0.00243891 | 0.989162 | 0.00243911  | 0.989240 |
| PhCCCH3+H                     | 0.00205726 | 0.991219 | 0.00205742  | 0.991298 |

|                |             |          |             |          |
|----------------|-------------|----------|-------------|----------|
| rad15          | 0.00187191  | 0.993091 | 0.00187206  | 0.993170 |
| PhCCH+CH3      | 0.00152883  | 0.994620 | 0.00152896  | 0.994699 |
| rad6           | 0.00110737  | 0.995727 | 0.00110745  | 0.995806 |
| rad45          | 0.00104527  | 0.996773 | 0.00104535  | 0.996851 |
| rad35          | 0.000875959 | 0.997649 | 0.000876030 | 0.997727 |
| PAH10+CH3      | 0.000391434 | 0.998040 | 0.000391466 | 0.998119 |
| rad12          | 0.000383060 | 0.998423 | 0.000383091 | 0.998502 |
| rad2           | 0.000225168 | 0.998648 | 0.000225187 | 0.998727 |
| rad23          | 0.000212462 | 0.998861 | 0.000212479 | 0.998940 |
| rad37          | 0.000150688 | 0.999011 | 0.000150700 | 0.999090 |
| rad19syn       | 0.000149943 | 0.999161 | 0.000149955 | 0.999240 |
| rad36          | 0.000110353 | 0.999272 | 0.000110362 | 0.999351 |
| PAH7+H         | 0.000104853 | 0.999377 | 0.000104861 | 0.999456 |
| rad26          | 9.47825e-05 | 0.999471 | 9.47900e-05 | 0.999550 |
| PAH3+H         | 9.38266e-05 | 0.999565 | 9.38341e-05 | 0.999644 |
| Phenyl+cycC3H4 | 7.95124e-05 | 0.999645 | 0.000000    | 0.999644 |
| rad1           | 6.12630e-05 | 0.999706 | 6.12679e-05 | 0.999705 |
| rad38          | 4.92295e-05 | 0.999755 | 4.92334e-05 | 0.999755 |
| rad30          | 4.11286e-05 | 0.999796 | 4.11319e-05 | 0.999796 |
| PAH9+H         | 3.86275e-05 | 0.999835 | 3.86306e-05 | 0.999834 |
| rad10          | 3.40163e-05 | 0.999869 | 3.40189e-05 | 0.999868 |
| rad11          | 2.83227e-05 | 0.999897 | 2.83249e-05 | 0.999897 |
| rad39          | 1.38817e-05 | 0.999911 | 1.38828e-05 | 0.999911 |
| rad7           | 1.00541e-05 | 0.999921 | 1.00549e-05 | 0.999921 |
| PAH1+H         | 8.42427e-06 | 0.999930 | 8.42496e-06 | 0.999929 |
| rad59          | 8.40704e-06 | 0.999938 | 8.40772e-06 | 0.999938 |
| rad22          | 8.11423e-06 | 0.999946 | 8.11489e-06 | 0.999946 |
| rad50          | 7.05558e-06 | 0.999953 | 7.05615e-06 | 0.999953 |
| rad46          | 6.12302e-06 | 0.999959 | 6.12352e-06 | 0.999959 |
| rad60syn       | 5.84877e-06 | 0.999965 | 5.84925e-06 | 0.999965 |
| rad8           | 5.53335e-06 | 0.999971 | 5.53380e-06 | 0.999970 |
| rad28          | 5.48664e-06 | 0.999976 | 5.48708e-06 | 0.999976 |
| rad60anti      | 3.71731e-06 | 0.999980 | 3.71761e-06 | 0.999979 |
| rad54          | 2.38747e-06 | 0.999982 | 2.38766e-06 | 0.999982 |
| rad51          | 2.32343e-06 | 0.999985 | 2.32363e-06 | 0.999984 |
| rad70          | 2.12957e-06 | 0.999987 | 2.12974e-06 | 0.999986 |
| rad43          | 1.88572e-06 | 0.999989 | 1.88587e-06 | 0.999988 |
| rad21          | 1.65996e-06 | 0.999990 | 1.66010e-06 | 0.999990 |
| rad3           | 1.34689e-06 | 0.999992 | 1.34699e-06 | 0.999991 |
| rad58          | 1.21984e-06 | 0.999993 | 1.21994e-06 | 0.999992 |
| rad4           | 1.08353e-06 | 0.999994 | 1.08361e-06 | 0.999993 |
| rad20          | 1.01684e-06 | 0.999995 | 1.01692e-06 | 0.999995 |
| rad61          | 9.21088e-07 | 0.999996 | 9.21163e-07 | 0.999995 |
| rad52          | 6.45950e-07 | 0.999997 | 6.46002e-07 | 0.999996 |
| rad34          | 6.04997e-07 | 0.999997 | 6.05045e-07 | 0.999997 |
| rad18          | 4.76529e-07 | 0.999998 | 4.76568e-07 | 0.999997 |
| rad13          | 3.74235e-07 | 0.999998 | 3.74266e-07 | 0.999998 |
| PAH8+H         | 3.48233e-07 | 0.999998 | 3.48261e-07 | 0.999998 |
| rad47          | 3.36579e-07 | 0.999999 | 3.36606e-07 | 0.999998 |
| rad55          | 1.91928e-07 | 0.999999 | 1.91943e-07 | 0.999998 |
| rad41          | 1.79483e-07 | 0.999999 | 1.79497e-07 | 0.999999 |
| rad24          | 1.73093e-07 | 0.999999 | 1.73108e-07 | 0.999999 |
| rad31          | 1.41180e-07 | 0.999999 | 1.41191e-07 | 0.999999 |
| rad5           | 1.25315e-07 | 0.999999 | 1.25325e-07 | 0.999999 |
| rad62          | 9.21360e-08 | 1.000000 | 9.21435e-08 | 0.999999 |
| rad56          | 8.39930e-08 | 1.000000 | 8.39997e-08 | 0.999999 |
| rad71          | 7.44091e-08 | 1.000000 | 7.44151e-08 | 0.999999 |
| rad53          | 7.13189e-08 | 1.000000 | 7.13246e-08 | 0.999999 |
| rad65          | 7.02468e-08 | 1.000000 | 7.02524e-08 | 0.999999 |
| rad68syn       | 5.96862e-08 | 1.000000 | 5.96911e-08 | 0.999999 |
| rad73          | 5.35735e-08 | 1.000000 | 5.35778e-08 | 1.000000 |
| rad40syn       | 5.00968e-08 | 1.000000 | 5.01008e-08 | 1.000000 |
| rad40anti      | 4.01251e-08 | 1.000000 | 4.01284e-08 | 1.000000 |
| rad68anti      | 3.87287e-08 | 1.000000 | 3.87317e-08 | 1.000000 |
| rad64          | 3.09258e-08 | 1.000000 | 3.09283e-08 | 1.000000 |
| rad27          | 2.72843e-08 | 1.000000 | 2.72865e-08 | 1.000000 |
| rad25          | 2.44184e-08 | 1.000000 | 2.44204e-08 | 1.000000 |
| rad33          | 1.50294e-08 | 1.000000 | 1.50306e-08 | 1.000000 |
| rad42          | 9.21940e-09 | 1.000000 | 9.22015e-09 | 1.000000 |
| rad14          | 3.31065e-09 | 1.000000 | 3.31092e-09 | 1.000000 |
| rad72          | 2.51224e-09 | 1.000000 | 2.51244e-09 | 1.000000 |

1000000.0 Pa, 900.00000 K

=====

| Rate constant             | True (fraction)       | Effective (fraction)  |
|---------------------------|-----------------------|-----------------------|
| Total                     | 1.49199e-12 (1.00 )   | 1.49183e-12 (1.00 )   |
| Formation of rad19        | 1.30395e-12 (0.874 )  | 1.30379e-12 (0.874 )  |
| H-abstraction to cyc2enyl | 1.56554e-13 (0.105 )  | 1.56554e-13 (0.105 )  |
| H-abstraction to cyclenyl | 3.14892e-14 (0.0211 ) | 3.14853e-14 (0.0211 ) |

| species                       | PYtrue      | Cumul    | PYeffective | Cumul    |
|-------------------------------|-------------|----------|-------------|----------|
| rad9                          | 0.558885    | 0.558885 | 0.558947    | 0.558947 |
| Indene+H                      | 0.143604    | 0.702489 | 0.143620    | 0.702567 |
| PhCHCCH2+H                    | 0.125665    | 0.828154 | 0.125679    | 0.828246 |
| Benzene+cycloprop-2-enylidene | 0.104929    | 0.933083 | 0.104941    | 0.933187 |
| Benzene+cycloprop-1-enylidene | 0.0211054   | 0.954188 | 0.0211052   | 0.954292 |
| PhcycC3H3_B+H                 | 0.00826734  | 0.962456 | 0.00826826  | 0.962560 |
| PhcycC3H3_A+H                 | 0.00707103  | 0.969527 | 0.00707182  | 0.969632 |
| Ph+MeAc                       | 0.00442916  | 0.973956 | 0.00442965  | 0.974062 |
| C2H2+PhCH2                    | 0.00436103  | 0.978317 | 0.00436151  | 0.978423 |
| Ph+Allene                     | 0.00397280  | 0.982290 | 0.00397325  | 0.982397 |
| PhCH2CCH+H                    | 0.00379179  | 0.986082 | 0.00379222  | 0.986189 |
| rad19anti                     | 0.00281200  | 0.988894 | 0.00281231  | 0.989001 |
| rad67                         | 0.00183932  | 0.990733 | 0.00183952  | 0.990841 |
| rad12                         | 0.00165902  | 0.992392 | 0.00165920  | 0.992500 |
| PhCCCH3+H                     | 0.00153852  | 0.993931 | 0.00153869  | 0.994039 |
| PhCCH+CH3                     | 0.00112978  | 0.995060 | 0.00112991  | 0.995169 |
| rad15                         | 0.00112084  | 0.996181 | 0.00112097  | 0.996290 |
| rad45                         | 0.000805327 | 0.996986 | 0.000805416 | 0.997095 |
| rad6                          | 0.000751117 | 0.997738 | 0.000751201 | 0.997846 |
| rad35                         | 0.000660777 | 0.998398 | 0.000660850 | 0.998507 |
| PAH10+CH3                     | 0.000291720 | 0.998690 | 0.000291752 | 0.998799 |
| rad2                          | 0.000177820 | 0.998868 | 0.000177839 | 0.998977 |
| rad19syn                      | 0.000154527 | 0.999022 | 0.000154544 | 0.999131 |
| rad23                         | 0.000137740 | 0.999160 | 0.000137754 | 0.999269 |
| rad37                         | 0.000110990 | 0.999271 | 0.000111003 | 0.999380 |
| Phenyl+cycC3H4                | 0.000108115 | 0.999379 | 0.000000    | 0.999380 |
| rad36                         | 8.53647e-05 | 0.999465 | 8.53742e-05 | 0.999465 |
| PAH7+H                        | 7.95760e-05 | 0.999544 | 7.95849e-05 | 0.999545 |
| PAH3+H                        | 7.16562e-05 | 0.999616 | 7.16641e-05 | 0.999617 |
| rad26                         | 6.02360e-05 | 0.999676 | 6.02427e-05 | 0.999677 |
| rad1                          | 5.66447e-05 | 0.999733 | 5.66510e-05 | 0.999733 |
| rad8                          | 4.05299e-05 | 0.999773 | 4.05344e-05 | 0.999774 |
| rad38                         | 3.69590e-05 | 0.999810 | 3.69631e-05 | 0.999811 |
| rad30                         | 3.10739e-05 | 0.999841 | 3.10774e-05 | 0.999842 |
| PAH9+H                        | 2.98664e-05 | 0.999871 | 2.98698e-05 | 0.999872 |
| rad10                         | 2.24967e-05 | 0.999894 | 2.24992e-05 | 0.999894 |
| rad11                         | 2.13456e-05 | 0.999915 | 2.13480e-05 | 0.999916 |
| rad39                         | 1.06025e-05 | 0.999926 | 1.06037e-05 | 0.999926 |
| rad22                         | 9.03898e-06 | 0.999935 | 9.03992e-06 | 0.999935 |
| rad7                          | 7.23559e-06 | 0.999942 | 7.23640e-06 | 0.999943 |
| rad59                         | 6.41042e-06 | 0.999948 | 6.41113e-06 | 0.999949 |
| PAH1+H                        | 6.36098e-06 | 0.999955 | 6.36168e-06 | 0.999955 |
| rad21                         | 6.20914e-06 | 0.999961 | 6.20983e-06 | 0.999962 |
| rad50                         | 5.52093e-06 | 0.999966 | 5.52154e-06 | 0.999967 |
| rad46                         | 4.74137e-06 | 0.999971 | 4.74189e-06 | 0.999972 |
| rad60syn                      | 4.44474e-06 | 0.999976 | 4.44523e-06 | 0.999976 |
| rad28                         | 3.62349e-06 | 0.999979 | 3.62389e-06 | 0.999980 |
| rad60anti                     | 2.82594e-06 | 0.999982 | 2.82625e-06 | 0.999983 |
| rad20                         | 2.80726e-06 | 0.999985 | 2.80758e-06 | 0.999986 |
| rad54                         | 1.88891e-06 | 0.999987 | 1.88912e-06 | 0.999987 |
| rad51                         | 1.82098e-06 | 0.999989 | 1.82118e-06 | 0.999989 |
| rad70                         | 1.61566e-06 | 0.999990 | 1.61584e-06 | 0.999991 |
| rad43                         | 1.41767e-06 | 0.999992 | 1.41782e-06 | 0.999992 |
| rad3                          | 1.07853e-06 | 0.999993 | 1.07864e-06 | 0.999993 |
| rad24                         | 1.02525e-06 | 0.999994 | 1.02536e-06 | 0.999994 |
| rad58                         | 9.36751e-07 | 0.999995 | 9.36852e-07 | 0.999995 |
| rad4                          | 8.74166e-07 | 0.999996 | 8.74260e-07 | 0.999996 |
| rad61                         | 6.94754e-07 | 0.999996 | 6.94832e-07 | 0.999997 |
| rad18                         | 5.38063e-07 | 0.999997 | 5.38122e-07 | 0.999997 |
| rad13                         | 5.12444e-07 | 0.999997 | 5.12501e-07 | 0.999998 |
| rad52                         | 5.04659e-07 | 0.999998 | 5.04714e-07 | 0.999998 |
| rad34                         | 4.59992e-07 | 0.999998 | 4.60044e-07 | 0.999999 |
| rad47                         | 2.84601e-07 | 0.999999 | 2.84632e-07 | 0.999999 |
| PAH8+H                        | 2.67292e-07 | 0.999999 | 2.67321e-07 | 0.999999 |
| rad55                         | 1.52216e-07 | 0.999999 | 1.52233e-07 | 1.000000 |
| rad31                         | 1.47021e-07 | 0.999999 | 1.47037e-07 | 1.000000 |
| rad41                         | 1.35639e-07 | 0.999999 | 1.35655e-07 | 1.000000 |
| rad5                          | 8.81848e-08 | 0.999999 | 8.81942e-08 | 1.000000 |
| rad62                         | 7.03727e-08 | 0.999999 | 7.03805e-08 | 1.000000 |
| rad56                         | 6.75765e-08 | 0.999999 | 6.75840e-08 | 1.000000 |
| rad71                         | 5.98164e-08 | 0.999999 | 5.98230e-08 | 1.000000 |
| rad53                         | 5.71130e-08 | 1.000000 | 5.71193e-08 | 1.000000 |
| rad65                         | 5.52652e-08 | 1.000000 | 5.52713e-08 | 1.000000 |
| rad33                         | 5.06336e-08 | 1.000000 | 5.06392e-08 | 1.000000 |
| rad68syn                      | 4.56871e-08 | 1.000000 | 4.56921e-08 | 1.000000 |
| rad73                         | 4.28167e-08 | 1.000000 | 4.28214e-08 | 1.000000 |
| rad27                         | 3.89538e-08 | 1.000000 | 3.89581e-08 | 1.000000 |



|           |             |          |             |          |
|-----------|-------------|----------|-------------|----------|
| rad40syn  | 3.83352e-08 | 1.000000 | 3.83394e-08 | 1.000000 |
| rad25     | 3.77798e-08 | 1.000000 | 3.77839e-08 | 1.000000 |
| rad40anti | 3.06914e-08 | 1.000000 | 3.06948e-08 | 1.000000 |
| rad68anti | 2.96423e-08 | 1.000000 | 2.96456e-08 | 1.000000 |
| rad64     | 2.39616e-08 | 1.000000 | 2.39642e-08 | 1.000000 |
| rad42     | 7.08225e-09 | 1.000000 | 7.08304e-09 | 1.000000 |
| rad14     | 3.27115e-09 | 1.000000 | 3.27151e-09 | 1.000000 |
| rad72     | 2.04119e-09 | 1.000000 | 2.04142e-09 | 1.000000 |

10000000.0 Pa, 1000.00000 K

```

=====
Rate constant          | True (fraction)          Effective (fraction)
-----
Total                  | 2.07591e-12 (1.00   ) 2.07565e-12 (1.00   )
Formation of rad19    | 1.74189e-12 (0.839  ) 1.74164e-12 (0.839  )
H-abstraction to cyc2enyl | 2.68753e-13 (0.129  ) 2.68753e-13 (0.129  )
H-abstraction to cyclenyl | 6.52627e-14 (0.0314 ) 6.52535e-14 (0.0314 )

```

| species                       | PYtrue      | Cumul    | PYeffective | Cumul    |
|-------------------------------|-------------|----------|-------------|----------|
| rad9                          | 0.605831    | 0.605831 | 0.605905    | 0.605905 |
| Benzene+cycloprop-2-enylidene | 0.129463    | 0.735294 | 0.129479    | 0.735384 |
| Indene+H                      | 0.102841    | 0.838135 | 0.102854    | 0.838238 |
| PhCHCCH2+H                    | 0.0910330   | 0.929168 | 0.0910439   | 0.929282 |
| Benzene+cycloprop-1-enylidene | 0.0314382   | 0.960606 | 0.0314376   | 0.960720 |
| PhcycC3H3_B+H                 | 0.00764899  | 0.968255 | 0.00764993  | 0.968370 |
| PhcycC3H3_A+H                 | 0.00653695  | 0.974792 | 0.00653776  | 0.974908 |
| rad12                         | 0.00362396  | 0.978416 | 0.00362441  | 0.978532 |
| Ph+MeAc                       | 0.00320559  | 0.981621 | 0.00320599  | 0.981738 |
| C2H2+PhCH2                    | 0.00314926  | 0.984771 | 0.00314965  | 0.984888 |
| Ph+Allene                     | 0.00289745  | 0.987668 | 0.00289780  | 0.987786 |
| PhCH2CCH+H                    | 0.00274457  | 0.990413 | 0.00274491  | 0.990530 |
| rad19anti                     | 0.00244291  | 0.992856 | 0.00244321  | 0.992974 |
| rad67                         | 0.00133496  | 0.994191 | 0.00133513  | 0.994309 |
| PhCCCH3+H                     | 0.00111042  | 0.995301 | 0.00111055  | 0.995419 |
| rad15                         | 0.000900705 | 0.996202 | 0.000900815 | 0.996320 |
| PhCCH+CH3                     | 0.000801427 | 0.997003 | 0.000801525 | 0.997122 |
| rad45                         | 0.000586303 | 0.997589 | 0.000586376 | 0.997708 |
| rad6                          | 0.000510969 | 0.998100 | 0.000511032 | 0.998219 |
| rad35                         | 0.000479681 | 0.998580 | 0.000479740 | 0.998699 |
| PAH10+CH3                     | 0.000207741 | 0.998788 | 0.000207766 | 0.998907 |
| rad8                          | 0.000181354 | 0.998969 | 0.000181377 | 0.999088 |
| rad19syn                      | 0.000144364 | 0.999114 | 0.000144381 | 0.999232 |
| rad2                          | 0.000130584 | 0.999244 | 0.000130600 | 0.999363 |
| Phenyl+cycC3H4                | 0.000118811 | 0.999363 | 0.000000    | 0.999363 |
| rad23                         | 9.14139e-05 | 0.999454 | 9.14248e-05 | 0.999454 |
| rad37                         | 7.81801e-05 | 0.999533 | 7.81897e-05 | 0.999533 |
| rad36                         | 5.99549e-05 | 0.999593 | 5.99624e-05 | 0.999593 |
| PAH7+H                        | 5.72014e-05 | 0.999650 | 5.72085e-05 | 0.999650 |
| PAH3+H                        | 5.22595e-05 | 0.999702 | 5.22659e-05 | 0.999702 |
| rad1                          | 4.21715e-05 | 0.999744 | 4.21768e-05 | 0.999744 |
| rad26                         | 3.86111e-05 | 0.999783 | 3.86159e-05 | 0.999783 |
| rad21                         | 3.00076e-05 | 0.999813 | 3.00113e-05 | 0.999813 |
| rad38                         | 2.66366e-05 | 0.999839 | 2.66399e-05 | 0.999839 |
| rad30                         | 2.25183e-05 | 0.999862 | 2.25211e-05 | 0.999862 |
| rad11                         | 2.24987e-05 | 0.999884 | 2.25014e-05 | 0.999884 |
| PAH9+H                        | 2.21496e-05 | 0.999907 | 2.21523e-05 | 0.999907 |
| rad10                         | 1.51495e-05 | 0.999922 | 1.51514e-05 | 0.999922 |
| rad22                         | 1.50277e-05 | 0.999937 | 1.50296e-05 | 0.999937 |
| rad20                         | 9.98225e-06 | 0.999947 | 9.98350e-06 | 0.999947 |
| rad39                         | 7.70053e-06 | 0.999954 | 7.70148e-06 | 0.999954 |
| rad7                          | 5.84052e-06 | 0.999960 | 5.84125e-06 | 0.999960 |
| rad59                         | 4.67000e-06 | 0.999965 | 4.67057e-06 | 0.999965 |
| PAH1+H                        | 4.58145e-06 | 0.999970 | 4.58201e-06 | 0.999970 |
| rad50                         | 4.14658e-06 | 0.999974 | 4.14709e-06 | 0.999974 |
| rad24                         | 3.65681e-06 | 0.999977 | 3.65726e-06 | 0.999977 |
| rad46                         | 3.54033e-06 | 0.999981 | 3.54076e-06 | 0.999981 |
| rad60syn                      | 3.23103e-06 | 0.999984 | 3.23143e-06 | 0.999984 |
| rad28                         | 2.37236e-06 | 0.999986 | 2.37265e-06 | 0.999987 |
| rad60anti                     | 2.05471e-06 | 0.999989 | 2.05497e-06 | 0.999989 |
| rad54                         | 1.39732e-06 | 0.999990 | 1.39749e-06 | 0.999990 |
| rad51                         | 1.36786e-06 | 0.999991 | 1.36802e-06 | 0.999991 |
| rad70                         | 1.15912e-06 | 0.999992 | 1.15926e-06 | 0.999993 |
| rad13                         | 1.04581e-06 | 0.999994 | 1.04594e-06 | 0.999994 |
| rad43                         | 1.02103e-06 | 0.999995 | 1.02116e-06 | 0.999995 |
| rad18                         | 9.39757e-07 | 0.999995 | 9.39874e-07 | 0.999996 |
| rad3                          | 7.85080e-07 | 0.999996 | 7.85176e-07 | 0.999996 |
| rad58                         | 6.85966e-07 | 0.999997 | 6.86050e-07 | 0.999997 |
| rad4                          | 6.20439e-07 | 0.999998 | 6.20516e-07 | 0.999998 |
| rad61                         | 5.00532e-07 | 0.999998 | 5.00593e-07 | 0.999998 |

|           |             |          |             |          |
|-----------|-------------|----------|-------------|----------|
| rad52     | 3.78441e-07 | 0.999998 | 3.78488e-07 | 0.999998 |
| rad34     | 3.30201e-07 | 0.999999 | 3.30242e-07 | 0.999999 |
| rad47     | 2.09107e-07 | 0.999999 | 2.09132e-07 | 0.999999 |
| rad33     | 1.94683e-07 | 0.999999 | 1.94708e-07 | 0.999999 |
| PAH8+H    | 1.93630e-07 | 0.999999 | 1.93654e-07 | 0.999999 |
| rad55     | 1.12799e-07 | 0.999999 | 1.12813e-07 | 1.000000 |
| rad31     | 1.12601e-07 | 1.000000 | 1.12615e-07 | 1.000000 |
| rad25     | 1.06512e-07 | 1.000000 | 1.06525e-07 | 1.000000 |
| rad41     | 9.80193e-08 | 1.000000 | 9.80318e-08 | 1.000000 |
| rad27     | 7.60865e-08 | 1.000000 | 7.60958e-08 | 1.000000 |
| rad5      | 7.00079e-08 | 1.000000 | 7.00165e-08 | 1.000000 |
| rad62     | 5.12437e-08 | 1.000000 | 5.12500e-08 | 1.000000 |
| rad56     | 5.06404e-08 | 1.000000 | 5.06467e-08 | 1.000000 |
| rad71     | 4.59584e-08 | 1.000000 | 4.59641e-08 | 1.000000 |
| rad53     | 4.26399e-08 | 1.000000 | 4.26452e-08 | 1.000000 |
| rad65     | 4.13726e-08 | 1.000000 | 4.13777e-08 | 1.000000 |
| rad68syn  | 3.28886e-08 | 1.000000 | 3.28926e-08 | 1.000000 |
| rad73     | 3.27671e-08 | 1.000000 | 3.27712e-08 | 1.000000 |
| rad40syn  | 2.77646e-08 | 1.000000 | 2.77680e-08 | 1.000000 |
| rad40anti | 2.22560e-08 | 1.000000 | 2.22587e-08 | 1.000000 |
| rad68anti | 2.13374e-08 | 1.000000 | 2.13401e-08 | 1.000000 |
| rad64     | 1.75805e-08 | 1.000000 | 1.75827e-08 | 1.000000 |
| rad42     | 5.17684e-09 | 1.000000 | 5.17749e-09 | 1.000000 |
| rad14     | 4.58180e-09 | 1.000000 | 4.58237e-09 | 1.000000 |
| rad72     | 1.57874e-09 | 1.000000 | 1.57893e-09 | 1.000000 |

10000000.0 Pa, 1100.00000 K

=====

| Rate constant             | True (fraction)       | Effective (fraction)  |
|---------------------------|-----------------------|-----------------------|
| Total                     | 2.81236e-12 (1.00 )   | 2.81195e-12 (1.00 )   |
| Formation of rad19        | 2.25993e-12 (0.804 )  | 2.25954e-12 (0.804 )  |
| H-abstraction to cyc2enyl | 4.30538e-13 (0.153 )  | 4.30538e-13 (0.153 )  |
| H-abstraction to cyclenyl | 1.21896e-13 (0.0433 ) | 1.21875e-13 (0.0433 ) |

| species                       | PYtrue      | Cumul    | PYeffective | Cumul    |
|-------------------------------|-------------|----------|-------------|----------|
| rad9                          | 0.606287    | 0.606287 | 0.606376    | 0.606376 |
| Benzene+cycloprop-2-enylidene | 0.153088    | 0.759374 | 0.153110    | 0.759486 |
| Indene+H                      | 0.0844005   | 0.843775 | 0.0844127   | 0.843899 |
| PhCHCCH2+H                    | 0.0766595   | 0.920434 | 0.0766707   | 0.920569 |
| Benzene+cycloprop-1-enylidene | 0.0433429   | 0.963777 | 0.0433418   | 0.963911 |
| PhcycC3H3_B+H                 | 0.00689674  | 0.970674 | 0.00689775  | 0.970809 |
| PhcycC3H3_A+H                 | 0.00590507  | 0.976579 | 0.00590594  | 0.976715 |
| rad12                         | 0.00465892  | 0.981238 | 0.00465960  | 0.981374 |
| Ph+MeAc                       | 0.00270250  | 0.983940 | 0.00270289  | 0.984077 |
| C2H2+PhCH2                    | 0.00261944  | 0.986560 | 0.00261982  | 0.986697 |
| Ph+Allene                     | 0.00244709  | 0.989007 | 0.00244744  | 0.989145 |
| PhCH2CCH+H                    | 0.00230285  | 0.991310 | 0.00230319  | 0.991448 |
| rad19anti                     | 0.00210905  | 0.993419 | 0.00210935  | 0.993557 |
| rad67                         | 0.00112525  | 0.994544 | 0.00112542  | 0.994683 |
| rad15                         | 0.000956336 | 0.995500 | 0.000956479 | 0.995639 |
| PhCCCH3+H                     | 0.000933185 | 0.996434 | 0.000933321 | 0.996572 |
| PhCCH+CH3                     | 0.000672036 | 0.997106 | 0.000672134 | 0.997245 |
| rad45                         | 0.000483494 | 0.997589 | 0.000483566 | 0.997728 |
| rad8                          | 0.000407955 | 0.997997 | 0.000408014 | 0.998136 |
| rad35                         | 0.000404391 | 0.998402 | 0.000404450 | 0.998541 |
| rad6                          | 0.000403906 | 0.998805 | 0.000403965 | 0.998945 |
| PAH10+CH3                     | 0.000175451 | 0.998981 | 0.000175476 | 0.999120 |
| Phenyl+cycC3H4                | 0.000139292 | 0.999120 | 0.000000    | 0.999120 |
| rad19syn                      | 0.000129942 | 0.999250 | 0.000129962 | 0.999250 |
| rad2                          | 0.000107314 | 0.999357 | 0.000107331 | 0.999357 |
| rad21                         | 8.97121e-05 | 0.999447 | 8.97250e-05 | 0.999447 |
| rad23                         | 7.34754e-05 | 0.999521 | 7.34862e-05 | 0.999521 |
| rad37                         | 6.52387e-05 | 0.999586 | 6.52482e-05 | 0.999586 |
| rad36                         | 4.83945e-05 | 0.999634 | 4.84016e-05 | 0.999634 |
| PAH7+H                        | 4.77497e-05 | 0.999682 | 4.77567e-05 | 0.999682 |
| PAH3+H                        | 4.41467e-05 | 0.999726 | 4.41531e-05 | 0.999726 |
| rad11                         | 3.63147e-05 | 0.999762 | 3.63200e-05 | 0.999762 |
| rad1                          | 3.36596e-05 | 0.999796 | 3.36645e-05 | 0.999796 |
| rad26                         | 2.83616e-05 | 0.999825 | 2.83657e-05 | 0.999824 |
| rad22                         | 2.30774e-05 | 0.999848 | 2.30807e-05 | 0.999848 |
| rad20                         | 2.30598e-05 | 0.999871 | 2.30631e-05 | 0.999871 |
| rad38                         | 2.25978e-05 | 0.999893 | 2.26012e-05 | 0.999893 |
| PAH9+H                        | 1.90215e-05 | 0.999912 | 1.90243e-05 | 0.999912 |
| rad30                         | 1.89005e-05 | 0.999931 | 1.89033e-05 | 0.999931 |
| rad10                         | 1.45129e-05 | 0.999946 | 1.45151e-05 | 0.999946 |
| rad7                          | 6.88701e-06 | 0.999953 | 6.88802e-06 | 0.999952 |
| rad39                         | 6.51287e-06 | 0.999959 | 6.51382e-06 | 0.999959 |
| rad24                         | 6.22313e-06 | 0.999965 | 6.22404e-06 | 0.999965 |

|           |             |          |             |          |
|-----------|-------------|----------|-------------|----------|
| rad59     | 3.94086e-06 | 0.999969 | 3.94144e-06 | 0.999969 |
| PAH1+H    | 3.88756e-06 | 0.999973 | 3.88813e-06 | 0.999973 |
| rad50     | 3.59098e-06 | 0.999977 | 3.59151e-06 | 0.999977 |
| rad46     | 3.05777e-06 | 0.999980 | 3.05822e-06 | 0.999980 |
| rad13     | 2.81266e-06 | 0.999983 | 2.81308e-06 | 0.999983 |
| rad60syn  | 2.72076e-06 | 0.999985 | 2.72116e-06 | 0.999985 |
| rad18     | 1.88731e-06 | 0.999987 | 1.88759e-06 | 0.999987 |
| rad28     | 1.81857e-06 | 0.999989 | 1.81884e-06 | 0.999989 |
| rad60anti | 1.73059e-06 | 0.999991 | 1.73084e-06 | 0.999991 |
| rad51     | 1.18533e-06 | 0.999992 | 1.18550e-06 | 0.999992 |
| rad54     | 1.17238e-06 | 0.999993 | 1.17255e-06 | 0.999993 |
| rad70     | 9.47424e-07 | 0.999994 | 9.47568e-07 | 0.999994 |
| rad43     | 8.39465e-07 | 0.999995 | 8.39587e-07 | 0.999995 |
| rad3      | 6.31688e-07 | 0.999996 | 6.31780e-07 | 0.999996 |
| rad33     | 5.91112e-07 | 0.999996 | 5.91199e-07 | 0.999996 |
| rad58     | 5.81656e-07 | 0.999997 | 5.81741e-07 | 0.999997 |
| rad4      | 4.90449e-07 | 0.999997 | 4.90521e-07 | 0.999997 |
| rad61     | 4.27574e-07 | 0.999998 | 4.27637e-07 | 0.999998 |
| rad25     | 3.92761e-07 | 0.999998 | 3.92818e-07 | 0.999998 |
| rad52     | 3.27684e-07 | 0.999998 | 3.27731e-07 | 0.999998 |
| rad34     | 2.69770e-07 | 0.999999 | 2.69810e-07 | 0.999999 |
| rad27     | 2.10321e-07 | 0.999999 | 2.10352e-07 | 0.999999 |
| rad47     | 1.71810e-07 | 0.999999 | 1.71836e-07 | 0.999999 |
| PAH8+H    | 1.59138e-07 | 0.999999 | 1.59161e-07 | 0.999999 |
| rad55     | 9.47730e-08 | 0.999999 | 9.47865e-08 | 0.999999 |
| rad31     | 9.19179e-08 | 0.999999 | 9.19315e-08 | 0.999999 |
| rad41     | 8.06567e-08 | 0.999999 | 8.06682e-08 | 0.999999 |
| rad5      | 5.90249e-08 | 0.999999 | 5.90336e-08 | 0.999999 |
| rad56     | 4.29498e-08 | 1.000000 | 4.29562e-08 | 0.999999 |
| rad62     | 4.24797e-08 | 1.000000 | 4.24860e-08 | 0.999999 |
| rad71     | 4.05070e-08 | 1.000000 | 4.05130e-08 | 1.000000 |
| rad53     | 3.60494e-08 | 1.000000 | 3.60547e-08 | 1.000000 |
| rad65     | 3.57212e-08 | 1.000000 | 3.57265e-08 | 1.000000 |
| rad73     | 2.88015e-08 | 1.000000 | 2.88057e-08 | 1.000000 |
| rad68syn  | 2.68812e-08 | 1.000000 | 2.68852e-08 | 1.000000 |
| rad40syn  | 2.28280e-08 | 1.000000 | 2.28313e-08 | 1.000000 |
| rad40anti | 1.83223e-08 | 1.000000 | 1.83251e-08 | 1.000000 |
| rad68anti | 1.74396e-08 | 1.000000 | 1.74422e-08 | 1.000000 |
| rad64     | 1.50574e-08 | 1.000000 | 1.50596e-08 | 1.000000 |
| rad14     | 9.92529e-09 | 1.000000 | 9.92671e-09 | 1.000000 |
| rad42     | 4.29465e-09 | 1.000000 | 4.29529e-09 | 1.000000 |
| rad72     | 1.39746e-09 | 1.000000 | 1.39767e-09 | 1.000000 |

1000000.0 Pa, 1200.00000 K

| Rate constant             | True (fraction)       | Effective (fraction)  |
|---------------------------|-----------------------|-----------------------|
| Total                     | 3.72623e-12 (1.00 )   | 3.72545e-12 (1.00 )   |
| Formation of rad19        | 2.86288e-12 (0.768 )  | 2.86215e-12 (0.768 )  |
| H-abstraction to cyc2enyl | 6.53266e-13 (0.175 )  | 6.53266e-13 (0.175 )  |
| H-abstraction to cyc1enyl | 2.10085e-13 (0.0564 ) | 2.10032e-13 (0.0564 ) |

| species                       | PYtrue      | Cumul    | PYeffective | Cumul    |
|-------------------------------|-------------|----------|-------------|----------|
| rad9                          | 0.586970    | 0.586970 | 0.587094    | 0.587094 |
| Benzene+cycloprop-2-enylidene | 0.175315    | 0.762285 | 0.175352    | 0.762447 |
| Indene+H                      | 0.0760843   | 0.838370 | 0.0761004   | 0.838547 |
| PhCHCCH2+H                    | 0.0707745   | 0.909144 | 0.0707895   | 0.909337 |
| Benzene+cycloprop-1-enylidene | 0.0563801   | 0.965524 | 0.0563775   | 0.965714 |
| PhcycC3H3_B+H                 | 0.00618080  | 0.971705 | 0.00618211  | 0.971896 |
| PhcycC3H3_A+H                 | 0.00531755  | 0.977023 | 0.00531867  | 0.977215 |
| rad12                         | 0.00489455  | 0.981917 | 0.00489558  | 0.982110 |
| Ph+MeAc                       | 0.00249775  | 0.984415 | 0.00249828  | 0.984609 |
| C2H2+PhCH2                    | 0.00238110  | 0.986796 | 0.00238160  | 0.986990 |
| Ph+Allene                     | 0.00225120  | 0.989047 | 0.00225168  | 0.989242 |
| PhCH2CCH+H                    | 0.00210474  | 0.991152 | 0.00210518  | 0.991347 |
| rad19anti                     | 0.00180990  | 0.992962 | 0.00181029  | 0.993157 |
| rad15                         | 0.00143987  | 0.994402 | 0.00144018  | 0.994598 |
| rad67                         | 0.00103501  | 0.995437 | 0.00103524  | 0.995633 |
| PhCCCH3+H                     | 0.000860286 | 0.996297 | 0.000860470 | 0.996493 |
| PhCCH+CH3                     | 0.000622367 | 0.996919 | 0.000622498 | 0.997116 |
| rad8                          | 0.000613365 | 0.997533 | 0.000613494 | 0.997729 |
| rad45                         | 0.000432871 | 0.997966 | 0.000432963 | 0.998162 |
| rad35                         | 0.000372011 | 0.998338 | 0.000372089 | 0.998534 |
| rad6                          | 0.000356224 | 0.998694 | 0.000356300 | 0.998891 |
| Phenyl+cycC3H4                | 0.000196793 | 0.998891 | 0.000000    | 0.998891 |
| PAH10+CH3                     | 0.000162880 | 0.999054 | 0.000162914 | 0.999054 |
| rad21                         | 0.000151483 | 0.999205 | 0.000151515 | 0.999205 |
| rad19syn                      | 0.000115292 | 0.999320 | 0.000115316 | 0.999320 |
| rad2                          | 9.44101e-05 | 0.999415 | 9.44296e-05 | 0.999415 |

|           |             |          |             |          |
|-----------|-------------|----------|-------------|----------|
| rad11     | 7.91853e-05 | 0.999494 | 7.92017e-05 | 0.999494 |
| rad23     | 6.40444e-05 | 0.999558 | 6.40580e-05 | 0.999558 |
| rad37     | 6.01178e-05 | 0.999618 | 6.01305e-05 | 0.999618 |
| PAH7+H    | 4.36601e-05 | 0.999662 | 4.36693e-05 | 0.999662 |
| rad36     | 4.28948e-05 | 0.999705 | 4.29039e-05 | 0.999705 |
| PAH3+H    | 4.02715e-05 | 0.999745 | 4.02799e-05 | 0.999745 |
| rad20     | 3.32072e-05 | 0.999778 | 3.32142e-05 | 0.999778 |
| rad1      | 2.90086e-05 | 0.999807 | 2.90146e-05 | 0.999807 |
| rad22     | 2.51654e-05 | 0.999832 | 2.51707e-05 | 0.999833 |
| rad26     | 2.42122e-05 | 0.999857 | 2.42173e-05 | 0.999857 |
| rad10     | 2.14966e-05 | 0.999878 | 2.15011e-05 | 0.999878 |
| rad38     | 2.10793e-05 | 0.999899 | 2.10837e-05 | 0.999899 |
| PAH9+H    | 1.79561e-05 | 0.999917 | 1.79599e-05 | 0.999917 |
| rad30     | 1.72237e-05 | 0.999934 | 1.72274e-05 | 0.999935 |
| rad7      | 1.18152e-05 | 0.999946 | 1.18177e-05 | 0.999946 |
| rad24     | 7.37094e-06 | 0.999953 | 7.37250e-06 | 0.999954 |
| rad13     | 7.07600e-06 | 0.999961 | 7.07750e-06 | 0.999961 |
| rad39     | 6.04119e-06 | 0.999967 | 6.04246e-06 | 0.999967 |
| rad18     | 4.04736e-06 | 0.999971 | 4.04822e-06 | 0.999971 |
| PAH1+H    | 3.60731e-06 | 0.999974 | 3.60807e-06 | 0.999974 |
| rad59     | 3.59386e-06 | 0.999978 | 3.59462e-06 | 0.999978 |
| rad50     | 3.39946e-06 | 0.999981 | 3.40017e-06 | 0.999981 |
| rad46     | 2.89107e-06 | 0.999984 | 2.89168e-06 | 0.999984 |
| rad60syn  | 2.48005e-06 | 0.999987 | 2.48058e-06 | 0.999987 |
| rad28     | 1.58152e-06 | 0.999988 | 1.58186e-06 | 0.999988 |
| rad60anti | 1.57754e-06 | 0.999990 | 1.57787e-06 | 0.999990 |
| rad25     | 1.14039e-06 | 0.999991 | 1.14063e-06 | 0.999991 |
| rad51     | 1.12303e-06 | 0.999992 | 1.12327e-06 | 0.999992 |
| rad33     | 1.09752e-06 | 0.999993 | 1.09774e-06 | 0.999993 |
| rad54     | 1.07439e-06 | 0.999994 | 1.07462e-06 | 0.999994 |
| rad70     | 8.29592e-07 | 0.999995 | 8.29770e-07 | 0.999995 |
| rad43     | 7.43009e-07 | 0.999996 | 7.43165e-07 | 0.999996 |
| rad3      | 5.50384e-07 | 0.999996 | 5.50500e-07 | 0.999997 |
| rad58     | 5.31227e-07 | 0.999997 | 5.31339e-07 | 0.999997 |
| rad27     | 5.18244e-07 | 0.999997 | 5.18353e-07 | 0.999998 |
| rad4      | 4.23658e-07 | 0.999998 | 4.23747e-07 | 0.999998 |
| rad61     | 3.99598e-07 | 0.999998 | 3.99682e-07 | 0.999998 |
| rad52     | 3.10346e-07 | 0.999999 | 3.10411e-07 | 0.999999 |
| rad34     | 2.35937e-07 | 0.999999 | 2.35987e-07 | 0.999999 |
| rad47     | 1.53198e-07 | 0.999999 | 1.53230e-07 | 0.999999 |
| PAH8+H    | 1.40033e-07 | 0.999999 | 1.40062e-07 | 0.999999 |
| rad55     | 8.69344e-08 | 0.999999 | 8.69528e-08 | 0.999999 |
| rad31     | 8.03439e-08 | 0.999999 | 8.03611e-08 | 0.999999 |
| rad41     | 7.13800e-08 | 0.999999 | 7.13951e-08 | 1.000000 |
| rad5      | 5.82670e-08 | 0.999999 | 5.82793e-08 | 1.000000 |
| rad56     | 3.96541e-08 | 0.999999 | 3.96625e-08 | 1.000000 |
| rad71     | 3.88974e-08 | 0.999999 | 3.89057e-08 | 1.000000 |
| rad62     | 3.76124e-08 | 0.999999 | 3.76203e-08 | 1.000000 |
| rad65     | 3.38171e-08 | 1.000000 | 3.38242e-08 | 1.000000 |
| rad53     | 3.32101e-08 | 1.000000 | 3.32172e-08 | 1.000000 |
| rad73     | 2.75998e-08 | 1.000000 | 2.76056e-08 | 1.000000 |
| rad68syn  | 2.34842e-08 | 1.000000 | 2.34892e-08 | 1.000000 |
| rad14     | 2.33609e-08 | 1.000000 | 2.33658e-08 | 1.000000 |
| rad40syn  | 2.01156e-08 | 1.000000 | 2.01198e-08 | 1.000000 |
| rad40anti | 1.61770e-08 | 1.000000 | 1.61804e-08 | 1.000000 |
| rad68anti | 1.52357e-08 | 1.000000 | 1.52389e-08 | 1.000000 |
| rad64     | 1.40578e-08 | 1.000000 | 1.40608e-08 | 1.000000 |
| rad42     | 3.79784e-09 | 1.000000 | 3.79864e-09 | 1.000000 |
| rad72     | 1.34605e-09 | 1.000000 | 1.34634e-09 | 1.000000 |

1000000.0 Pa, 1300.00000 K

=====

| Rate constant             | True (fraction)       | Effective (fraction)  |
|---------------------------|-----------------------|-----------------------|
| Total                     | 4.84401e-12 (1.00 )   | 4.84228e-12 (1.00 )   |
| Formation of rad19        | 3.55537e-12 (0.734 )  | 3.55379e-12 (0.734 )  |
| H-abstraction to cyc2enyl | 9.48893e-13 (0.196 )  | 9.48893e-13 (0.196 )  |
| H-abstraction to cyclenyl | 3.39740e-13 (0.0701 ) | 3.39589e-13 (0.0701 ) |

| species                       | PYtrue     | Cumul    | PYeffective | Cumul    |
|-------------------------------|------------|----------|-------------|----------|
| rad9                          | 0.560034   | 0.560034 | 0.560234    | 0.560234 |
| Benzene+cycloprop-2-enylidene | 0.195890   | 0.755924 | 0.195960    | 0.756195 |
| Indene+H                      | 0.0717710  | 0.827695 | 0.0717966   | 0.827991 |
| Benzene+cycloprop-1-enylidene | 0.0701362  | 0.897831 | 0.0701301   | 0.898121 |
| PhCHCCH2+H                    | 0.0679737  | 0.965805 | 0.0679980   | 0.966119 |
| PhcycC3H3_B+H                 | 0.00559524 | 0.971400 | 0.00559724  | 0.971717 |
| PhcycC3H3_A+H                 | 0.00485334 | 0.976253 | 0.00485508  | 0.976572 |
| rad12                         | 0.00479995 | 0.981053 | 0.00480166  | 0.981373 |
| rad15                         | 0.00279527 | 0.983848 | 0.00279627  | 0.984170 |

|                |             |          |             |          |
|----------------|-------------|----------|-------------|----------|
| Ph+MeAc        | 0.00239668  | 0.986245 | 0.00239754  | 0.986567 |
| C2H2+PhCH2     | 0.00225795  | 0.988503 | 0.00225876  | 0.988826 |
| Ph+Allene      | 0.00213292  | 0.990636 | 0.00213368  | 0.990960 |
| PhCH2CCH+H     | 0.00197766  | 0.992614 | 0.00197837  | 0.992938 |
| rad19anti      | 0.00154703  | 0.994161 | 0.00154758  | 0.994485 |
| rad67          | 0.000981565 | 0.995142 | 0.000981912 | 0.995467 |
| PhCCCH3+H      | 0.000823893 | 0.995966 | 0.000824188 | 0.996292 |
| rad8           | 0.000776126 | 0.996742 | 0.000776403 | 0.997068 |
| PhCCH+CH3      | 0.000599475 | 0.997342 | 0.000599689 | 0.997668 |
| rad45          | 0.000403809 | 0.997746 | 0.000403953 | 0.998072 |
| rad35          | 0.000352849 | 0.998098 | 0.000352975 | 0.998425 |
| Phenyl+cycC3H4 | 0.000326276 | 0.998425 | 0.000000    | 0.998425 |
| rad6           | 0.000325914 | 0.998751 | 0.000326031 | 0.998751 |
| rad11          | 0.000188876 | 0.998939 | 0.000188943 | 0.998940 |
| rad21          | 0.000186122 | 0.999126 | 0.000186188 | 0.999126 |
| PAH10+CH3      | 0.000155472 | 0.999281 | 0.000155529 | 0.999281 |
| rad19syn       | 0.000101887 | 0.999383 | 0.000101924 | 0.999383 |
| rad2           | 8.57751e-05 | 0.999469 | 8.58058e-05 | 0.999469 |
| rad37          | 5.72365e-05 | 0.999526 | 5.72570e-05 | 0.999526 |
| rad23          | 5.70093e-05 | 0.999583 | 5.70298e-05 | 0.999583 |
| PAH7+H         | 4.14980e-05 | 0.999624 | 4.15128e-05 | 0.999625 |
| rad10          | 4.11394e-05 | 0.999666 | 4.11541e-05 | 0.999666 |
| rad36          | 3.98300e-05 | 0.999705 | 3.98443e-05 | 0.999706 |
| rad20          | 3.80623e-05 | 0.999743 | 3.80759e-05 | 0.999744 |
| PAH3+H         | 3.73944e-05 | 0.999781 | 3.74078e-05 | 0.999781 |
| rad1           | 2.60800e-05 | 0.999807 | 2.60893e-05 | 0.999807 |
| rad26          | 2.50656e-05 | 0.999832 | 2.50746e-05 | 0.999832 |
| rad22          | 2.40303e-05 | 0.999856 | 2.40389e-05 | 0.999856 |
| rad7           | 2.40064e-05 | 0.999880 | 2.40150e-05 | 0.999881 |
| rad38          | 2.03512e-05 | 0.999900 | 2.03585e-05 | 0.999901 |
| PAH9+H         | 1.77419e-05 | 0.999918 | 1.77483e-05 | 0.999919 |
| rad30          | 1.60521e-05 | 0.999934 | 1.60578e-05 | 0.999935 |
| rad13          | 1.26219e-05 | 0.999947 | 1.26264e-05 | 0.999947 |
| rad18          | 1.01580e-05 | 0.999957 | 1.01616e-05 | 0.999957 |
| rad24          | 7.58980e-06 | 0.999965 | 7.59252e-06 | 0.999965 |
| rad39          | 5.81512e-06 | 0.999970 | 5.81720e-06 | 0.999971 |
| PAH1+H         | 3.44419e-06 | 0.999974 | 3.44542e-06 | 0.999974 |
| rad50          | 3.35361e-06 | 0.999977 | 3.35480e-06 | 0.999978 |
| rad59          | 3.33788e-06 | 0.999980 | 3.33908e-06 | 0.999981 |
| rad46          | 2.85035e-06 | 0.999983 | 2.85137e-06 | 0.999984 |
| rad60syn       | 2.30540e-06 | 0.999986 | 2.30622e-06 | 0.999986 |
| rad25          | 2.01546e-06 | 0.999988 | 2.01618e-06 | 0.999988 |
| rad60anti      | 1.46629e-06 | 0.999989 | 1.46681e-06 | 0.999990 |
| rad28          | 1.45305e-06 | 0.999991 | 1.45357e-06 | 0.999991 |
| rad33          | 1.41554e-06 | 0.999992 | 1.41604e-06 | 0.999993 |
| rad51          | 1.10879e-06 | 0.999993 | 1.10919e-06 | 0.999994 |
| rad54          | 1.03579e-06 | 0.999994 | 1.03616e-06 | 0.999995 |
| rad27          | 8.52342e-07 | 0.999995 | 8.52649e-07 | 0.999996 |
| rad70          | 7.54796e-07 | 0.999996 | 7.55061e-07 | 0.999996 |
| rad43          | 6.89626e-07 | 0.999996 | 6.89873e-07 | 0.999997 |
| rad3           | 4.96840e-07 | 0.999997 | 4.97018e-07 | 0.999997 |
| rad58          | 4.93052e-07 | 0.999997 | 4.93228e-07 | 0.999998 |
| rad61          | 3.82182e-07 | 0.999998 | 3.82319e-07 | 0.999998 |
| rad4           | 3.80935e-07 | 0.999998 | 3.81072e-07 | 0.999999 |
| rad52          | 3.06353e-07 | 0.999999 | 3.06463e-07 | 0.999999 |
| rad34          | 2.14594e-07 | 0.999999 | 2.14671e-07 | 0.999999 |
| rad47          | 1.42420e-07 | 0.999999 | 1.42471e-07 | 0.999999 |
| PAH8+H         | 1.28879e-07 | 0.999999 | 1.28925e-07 | 1.000000 |
| rad55          | 8.38925e-08 | 0.999999 | 8.39226e-08 | 1.000000 |
| rad5           | 7.53651e-08 | 0.999999 | 7.53916e-08 | 1.000000 |
| rad31          | 7.26734e-08 | 0.999999 | 7.26994e-08 | 1.000000 |
| rad41          | 6.63464e-08 | 0.999999 | 6.63701e-08 | 1.000000 |
| rad14          | 4.10782e-08 | 0.999999 | 4.10929e-08 | 1.000000 |
| rad71          | 3.88374e-08 | 0.999999 | 3.88513e-08 | 1.000000 |
| rad56          | 3.84759e-08 | 0.999999 | 3.84897e-08 | 1.000000 |
| rad62          | 3.45768e-08 | 0.999999 | 3.45892e-08 | 1.000000 |
| rad65          | 3.34396e-08 | 0.999999 | 3.34516e-08 | 1.000000 |
| rad53          | 3.21683e-08 | 1.000000 | 3.21798e-08 | 1.000000 |
| rad73          | 2.75112e-08 | 1.000000 | 2.75211e-08 | 1.000000 |
| rad68syn       | 2.13747e-08 | 1.000000 | 2.13824e-08 | 1.000000 |
| rad40syn       | 1.85581e-08 | 1.000000 | 1.85647e-08 | 1.000000 |
| rad40anti      | 1.49687e-08 | 1.000000 | 1.49741e-08 | 1.000000 |
| rad68anti      | 1.38668e-08 | 1.000000 | 1.38718e-08 | 1.000000 |
| rad64          | 1.35414e-08 | 1.000000 | 1.35462e-08 | 1.000000 |
| rad42          | 3.49281e-09 | 1.000000 | 3.49406e-09 | 1.000000 |
| rad72          | 1.34719e-09 | 1.000000 | 1.34766e-09 | 1.000000 |

10000000.0 Pa, 1400.00000 K

=====

Rate constant | True (fraction)                      Effective (fraction)

|                           |                       |                       |
|---------------------------|-----------------------|-----------------------|
| Total                     | 6.19360e-12 (1.00 )   | 6.18961e-12 (1.00 )   |
| Formation of rad19        | 4.34185e-12 (0.701 )  | 4.33829e-12 (0.701 )  |
| H-abstraction to cyc2enyl | 1.32990e-12 (0.215 )  | 1.32990e-12 (0.215 )  |
| H-abstraction to cyclenyl | 5.21850e-13 (0.0843 ) | 5.21423e-13 (0.0842 ) |

| species                       | PYtrue      | Cumul    | PYeffective | Cumul    |
|-------------------------------|-------------|----------|-------------|----------|
| rad9                          | 0.530123    | 0.530123 | 0.530464    | 0.530464 |
| Benzene+cycloprop-2-enylidene | 0.214721    | 0.744844 | 0.214859    | 0.745324 |
| Benzene+cycloprop-1-enylidene | 0.0842564   | 0.829101 | 0.0842416   | 0.829565 |
| Indene+H                      | 0.0685385   | 0.897639 | 0.0685826   | 0.898148 |
| PhCHCCH2+H                    | 0.0662522   | 0.963891 | 0.0662947   | 0.964443 |
| rad15                         | 0.00575152  | 0.969643 | 0.00575522  | 0.970198 |
| PhcycC3H3_B+H                 | 0.00521784  | 0.974861 | 0.00522120  | 0.975419 |
| rad12                         | 0.00458635  | 0.979447 | 0.00458930  | 0.980008 |
| PhcycC3H3_A+H                 | 0.00457423  | 0.984021 | 0.00457717  | 0.984585 |
| Ph+MeAc                       | 0.00232749  | 0.986349 | 0.00232898  | 0.986914 |
| C2H2+PhCH2                    | 0.00217711  | 0.988526 | 0.00217851  | 0.989093 |
| Ph+Allene                     | 0.00202023  | 0.990546 | 0.00202153  | 0.991114 |
| PhCH2CCH+H                    | 0.00186751  | 0.992413 | 0.00186871  | 0.992983 |
| rad19anti                     | 0.00131941  | 0.993733 | 0.00132026  | 0.994303 |
| rad67                         | 0.000934035 | 0.994667 | 0.000934635 | 0.995238 |
| rad8                          | 0.000879902 | 0.995547 | 0.000880469 | 0.996119 |
| PhCCCH3+H                     | 0.000798731 | 0.996346 | 0.000799242 | 0.996918 |
| PhCCH+CH3                     | 0.000584027 | 0.996930 | 0.000584403 | 0.997502 |
| Phenyl+cycC3H4                | 0.000574256 | 0.997504 | 0.000000    | 0.997502 |
| rad45                         | 0.000381899 | 0.997886 | 0.000382146 | 0.997884 |
| rad11                         | 0.000360835 | 0.998247 | 0.000361067 | 0.998245 |
| rad35                         | 0.000335836 | 0.998582 | 0.000336052 | 0.998581 |
| rad6                          | 0.000310659 | 0.998893 | 0.000310859 | 0.998892 |
| rad21                         | 0.000197020 | 0.999090 | 0.000197147 | 0.999089 |
| PAH10+CH3                     | 0.000147316 | 0.999237 | 0.000147410 | 0.999237 |
| rad19syn                      | 9.01143e-05 | 0.999327 | 9.01721e-05 | 0.999327 |
| rad2                          | 7.88538e-05 | 0.999406 | 7.89044e-05 | 0.999406 |
| rad10                         | 7.42789e-05 | 0.999481 | 7.43261e-05 | 0.999480 |
| rad37                         | 5.42537e-05 | 0.999535 | 5.42886e-05 | 0.999535 |
| rad23                         | 5.36119e-05 | 0.999588 | 5.36465e-05 | 0.999588 |
| rad7                          | 4.59750e-05 | 0.999634 | 4.60046e-05 | 0.999634 |
| PAH7+H                        | 3.94662e-05 | 0.999674 | 3.94917e-05 | 0.999674 |
| rad20                         | 3.91929e-05 | 0.999713 | 3.92181e-05 | 0.999713 |
| rad36                         | 3.75822e-05 | 0.999751 | 3.76063e-05 | 0.999751 |
| PAH3+H                        | 3.47283e-05 | 0.999785 | 3.47506e-05 | 0.999785 |
| rad26                         | 3.35359e-05 | 0.999819 | 3.35575e-05 | 0.999819 |
| rad22                         | 2.49223e-05 | 0.999844 | 2.49383e-05 | 0.999844 |
| rad1                          | 2.38647e-05 | 0.999868 | 2.38800e-05 | 0.999868 |
| rad18                         | 2.22141e-05 | 0.999890 | 2.22283e-05 | 0.999890 |
| rad38                         | 1.96648e-05 | 0.999910 | 1.96775e-05 | 0.999910 |
| PAH9+H                        | 1.77851e-05 | 0.999927 | 1.77966e-05 | 0.999927 |
| rad13                         | 1.56486e-05 | 0.999943 | 1.56587e-05 | 0.999943 |
| rad30                         | 1.49457e-05 | 0.999958 | 1.49553e-05 | 0.999958 |
| rad24                         | 7.39186e-06 | 0.999965 | 7.39666e-06 | 0.999965 |
| rad39                         | 5.57945e-06 | 0.999971 | 5.58304e-06 | 0.999971 |
| rad50                         | 3.34597e-06 | 0.999974 | 3.34813e-06 | 0.999974 |
| PAH1+H                        | 3.27143e-06 | 0.999978 | 3.27353e-06 | 0.999978 |
| rad59                         | 3.10005e-06 | 0.999981 | 3.10205e-06 | 0.999981 |
| rad46                         | 2.84296e-06 | 0.999984 | 2.84479e-06 | 0.999984 |
| rad25                         | 2.50988e-06 | 0.999986 | 2.51150e-06 | 0.999986 |
| rad60syn                      | 2.14216e-06 | 0.999988 | 2.14355e-06 | 0.999988 |
| rad33                         | 1.45885e-06 | 0.999990 | 1.45979e-06 | 0.999990 |
| rad28                         | 1.45512e-06 | 0.999991 | 1.45606e-06 | 0.999991 |
| rad60anti                     | 1.36237e-06 | 0.999992 | 1.36325e-06 | 0.999992 |
| rad51                         | 1.10710e-06 | 0.999994 | 1.10781e-06 | 0.999994 |
| rad27                         | 1.04852e-06 | 0.999995 | 1.04920e-06 | 0.999995 |
| rad54                         | 9.94828e-07 | 0.999996 | 9.95473e-07 | 0.999996 |
| rad70                         | 7.05404e-07 | 0.999996 | 7.05854e-07 | 0.999996 |
| rad43                         | 6.59323e-07 | 0.999997 | 6.59748e-07 | 0.999997 |
| rad58                         | 4.57984e-07 | 0.999997 | 4.58279e-07 | 0.999997 |
| rad3                          | 4.48978e-07 | 0.999998 | 4.49268e-07 | 0.999998 |
| rad61                         | 3.61861e-07 | 0.999998 | 3.62094e-07 | 0.999998 |
| rad4                          | 3.43379e-07 | 0.999999 | 3.43600e-07 | 0.999999 |
| rad52                         | 3.05857e-07 | 0.999999 | 3.06055e-07 | 0.999999 |
| rad34                         | 2.00744e-07 | 0.999999 | 2.00873e-07 | 0.999999 |
| rad5                          | 1.36833e-07 | 0.999999 | 1.36921e-07 | 0.999999 |
| rad47                         | 1.34291e-07 | 0.999999 | 1.34378e-07 | 0.999999 |
| PAH8+H                        | 1.22351e-07 | 1.000000 | 1.22430e-07 | 0.999999 |
| rad55                         | 8.07045e-08 | 1.000000 | 8.07569e-08 | 1.000000 |
| rad31                         | 6.65980e-08 | 1.000000 | 6.66409e-08 | 1.000000 |
| rad41                         | 6.35745e-08 | 1.000000 | 6.36154e-08 | 1.000000 |
| rad14                         | 5.30589e-08 | 1.000000 | 5.30930e-08 | 1.000000 |

|           |             |          |             |          |
|-----------|-------------|----------|-------------|----------|
| rad71     | 3.91567e-08 | 1.000000 | 3.91819e-08 | 1.000000 |
| rad56     | 3.73027e-08 | 1.000000 | 3.73267e-08 | 1.000000 |
| rad65     | 3.35274e-08 | 1.000000 | 3.35490e-08 | 1.000000 |
| rad62     | 3.26322e-08 | 1.000000 | 3.26533e-08 | 1.000000 |
| rad53     | 3.11169e-08 | 1.000000 | 3.11369e-08 | 1.000000 |
| rad73     | 2.76983e-08 | 1.000000 | 2.77161e-08 | 1.000000 |
| rad68syn  | 2.00600e-08 | 1.000000 | 2.00729e-08 | 1.000000 |
| rad40syn  | 1.76562e-08 | 1.000000 | 1.76676e-08 | 1.000000 |
| rad40anti | 1.42821e-08 | 1.000000 | 1.42913e-08 | 1.000000 |
| rad68anti | 1.30133e-08 | 1.000000 | 1.30217e-08 | 1.000000 |
| rad64     | 1.29606e-08 | 1.000000 | 1.29690e-08 | 1.000000 |
| rad42     | 3.30523e-09 | 1.000000 | 3.30735e-09 | 1.000000 |
| rad72     | 1.36092e-09 | 1.000000 | 1.36179e-09 | 1.000000 |

10000000.0 Pa, 1500.00000 K

| Rate constant             | True (fraction)       | Effective (fraction)  |
|---------------------------|-----------------------|-----------------------|
| Total                     | 7.80417e-12 (1.00 )   | 7.79531e-12 (1.00 )   |
| Formation of rad19        | 5.22661e-12 (0.670 )  | 5.21888e-12 (0.669 )  |
| H-abstraction to cyc2enyl | 1.80920e-12 (0.232 )  | 1.80920e-12 (0.232 )  |
| H-abstraction to cyclenyl | 7.68359e-13 (0.0985 ) | 7.67223e-13 (0.0984 ) |

| species                       | PYtrue      | Cumul    | PYeffective | Cumul    |
|-------------------------------|-------------|----------|-------------|----------|
| rad9                          | 0.499220    | 0.499220 | 0.499788    | 0.499788 |
| Benzene+cycloprop-2-enylidene | 0.231825    | 0.731045 | 0.232088    | 0.731876 |
| Benzene+cycloprop-1-enylidene | 0.0984549   | 0.829500 | 0.0984211   | 0.830298 |
| Indene+H                      | 0.0654974   | 0.894997 | 0.0655718   | 0.895869 |
| PhCHCCH2+H                    | 0.0649164   | 0.959914 | 0.0649902   | 0.960860 |
| rad15                         | 0.0100671   | 0.969981 | 0.0100785   | 0.970938 |
| PhcycC3H3_B+H                 | 0.00511848  | 0.975099 | 0.00512429  | 0.976062 |
| PhcycC3H3_A+H                 | 0.00452971  | 0.979629 | 0.00453485  | 0.980597 |
| rad12                         | 0.00433509  | 0.983964 | 0.00434001  | 0.984937 |
| Ph+MeAc                       | 0.00226991  | 0.986234 | 0.00227249  | 0.987210 |
| C2H2+PhCH2                    | 0.00211570  | 0.988350 | 0.00211811  | 0.989328 |
| Ph+Allene                     | 0.00189832  | 0.990248 | 0.00190047  | 0.991228 |
| PhCH2CCH+H                    | 0.00177926  | 0.992027 | 0.00178129  | 0.993010 |
| rad19anti                     | 0.00112457  | 0.993152 | 0.00112585  | 0.994135 |
| Phenyl+cycC3H4                | 0.000990108 | 0.994142 | 0.000000    | 0.994135 |
| rad8                          | 0.000928145 | 0.995070 | 0.000929206 | 0.995065 |
| rad67                         | 0.000890594 | 0.995961 | 0.000891607 | 0.995956 |
| PhCCH3+H                      | 0.000779940 | 0.996739 | 0.000778825 | 0.996735 |
| PhCCH+CH3                     | 0.000569746 | 0.997308 | 0.000570394 | 0.997305 |
| rad11                         | 0.000508865 | 0.997817 | 0.000509444 | 0.997815 |
| rad45                         | 0.000360940 | 0.998178 | 0.000361350 | 0.998176 |
| rad6                          | 0.000343603 | 0.998522 | 0.000343994 | 0.998520 |
| rad35                         | 0.000320298 | 0.998842 | 0.000320662 | 0.998841 |
| rad21                         | 0.000194826 | 0.999037 | 0.000195047 | 0.999036 |
| PAH10+CH3                     | 0.000135462 | 0.999172 | 0.000135616 | 0.999172 |
| rad10                         | 0.000104277 | 0.999277 | 0.000104396 | 0.999276 |
| rad19syn                      | 7.99365e-05 | 0.999357 | 8.00275e-05 | 0.999356 |
| rad2                          | 7.29191e-05 | 0.999429 | 7.30019e-05 | 0.999429 |
| rad7                          | 7.04104e-05 | 0.999500 | 7.04900e-05 | 0.999500 |
| rad23                         | 5.82133e-05 | 0.999558 | 5.82795e-05 | 0.999558 |
| rad26                         | 5.61765e-05 | 0.999614 | 5.62404e-05 | 0.999614 |
| rad37                         | 4.99810e-05 | 0.999664 | 5.00378e-05 | 0.999664 |
| rad20                         | 3.82909e-05 | 0.999703 | 3.83344e-05 | 0.999702 |
| PAH7+H                        | 3.65616e-05 | 0.999739 | 3.66031e-05 | 0.999739 |
| rad36                         | 3.54721e-05 | 0.999775 | 3.55124e-05 | 0.999775 |
| rad18                         | 3.43413e-05 | 0.999809 | 3.43803e-05 | 0.999809 |
| PAH3+H                        | 3.26560e-05 | 0.999842 | 3.26932e-05 | 0.999842 |
| rad22                         | 2.98338e-05 | 0.999871 | 2.98678e-05 | 0.999871 |
| rad1                          | 2.20282e-05 | 0.999893 | 2.20532e-05 | 0.999894 |
| rad38                         | 1.86524e-05 | 0.999912 | 1.86736e-05 | 0.999912 |
| PAH9+H                        | 1.77460e-05 | 0.999930 | 1.77661e-05 | 0.999930 |
| rad13                         | 1.53560e-05 | 0.999945 | 1.53734e-05 | 0.999945 |
| rad30                         | 1.40338e-05 | 0.999959 | 1.40497e-05 | 0.999959 |
| rad24                         | 7.02711e-06 | 0.999966 | 7.03507e-06 | 0.999966 |
| rad39                         | 5.18947e-06 | 0.999971 | 5.19537e-06 | 0.999972 |
| rad50                         | 3.32671e-06 | 0.999975 | 3.33049e-06 | 0.999975 |
| PAH1+H                        | 3.01801e-06 | 0.999978 | 3.02144e-06 | 0.999978 |
| rad59                         | 2.91409e-06 | 0.999981 | 2.91740e-06 | 0.999981 |
| rad46                         | 2.82596e-06 | 0.999984 | 2.82917e-06 | 0.999984 |
| rad25                         | 2.63860e-06 | 0.999986 | 2.64160e-06 | 0.999986 |
| rad60syn                      | 2.01250e-06 | 0.999988 | 2.01479e-06 | 0.999988 |
| rad28                         | 1.78037e-06 | 0.999990 | 1.78240e-06 | 0.999990 |
| rad33                         | 1.30530e-06 | 0.999991 | 1.30679e-06 | 0.999991 |
| rad60anti                     | 1.27998e-06 | 0.999993 | 1.28144e-06 | 0.999993 |
| rad27                         | 1.11347e-06 | 0.999994 | 1.11474e-06 | 0.999994 |

|           |             |          |             |          |
|-----------|-------------|----------|-------------|----------|
| rad51     | 1.10148e-06 | 0.999995 | 1.10273e-06 | 0.999995 |
| rad54     | 9.07518e-07 | 0.999996 | 9.08545e-07 | 0.999996 |
| rad70     | 6.72506e-07 | 0.999996 | 6.73266e-07 | 0.999997 |
| rad43     | 6.37593e-07 | 0.999997 | 6.38318e-07 | 0.999997 |
| rad58     | 4.31211e-07 | 0.999997 | 4.31701e-07 | 0.999998 |
| rad3      | 4.03341e-07 | 0.999998 | 4.03800e-07 | 0.999998 |
| rad5      | 3.40979e-07 | 0.999998 | 3.41367e-07 | 0.999998 |
| rad61     | 3.32298e-07 | 0.999998 | 3.32676e-07 | 0.999999 |
| rad4      | 3.07771e-07 | 0.999999 | 3.08121e-07 | 0.999999 |
| rad52     | 3.04284e-07 | 0.999999 | 3.04630e-07 | 0.999999 |
| rad34     | 1.91654e-07 | 0.999999 | 1.91871e-07 | 0.999999 |
| rad47     | 1.26620e-07 | 0.999999 | 1.26764e-07 | 1.000000 |
| PAH8+H    | 1.18079e-07 | 1.000000 | 1.18213e-07 | 1.000000 |
| rad55     | 7.37469e-08 | 1.000000 | 7.38307e-08 | 1.000000 |
| rad41     | 6.15867e-08 | 1.000000 | 6.16567e-08 | 1.000000 |
| rad31     | 6.14560e-08 | 1.000000 | 6.15259e-08 | 1.000000 |
| rad14     | 5.69921e-08 | 1.000000 | 5.70569e-08 | 1.000000 |
| rad71     | 3.92974e-08 | 1.000000 | 3.93421e-08 | 1.000000 |
| rad56     | 3.43688e-08 | 1.000000 | 3.44078e-08 | 1.000000 |
| rad65     | 3.35308e-08 | 1.000000 | 3.35689e-08 | 1.000000 |
| rad62     | 3.08964e-08 | 1.000000 | 3.09315e-08 | 1.000000 |
| rad53     | 2.86006e-08 | 1.000000 | 2.86332e-08 | 1.000000 |
| rad73     | 2.77635e-08 | 1.000000 | 2.77950e-08 | 1.000000 |
| rad68syn  | 1.92263e-08 | 1.000000 | 1.92482e-08 | 1.000000 |
| rad40syn  | 1.70530e-08 | 1.000000 | 1.70723e-08 | 1.000000 |
| rad40anti | 1.38147e-08 | 1.000000 | 1.38304e-08 | 1.000000 |
| rad68anti | 1.24719e-08 | 1.000000 | 1.24861e-08 | 1.000000 |
| rad64     | 1.18961e-08 | 1.000000 | 1.19096e-08 | 1.000000 |
| rad42     | 3.13824e-09 | 1.000000 | 3.14180e-09 | 1.000000 |
| rad72     | 1.36812e-09 | 1.000000 | 1.36967e-09 | 1.000000 |

1000000.00 Pa, 40.0000000 K

| Rate constant             | True (fraction)        | Effective (fraction)   |
|---------------------------|------------------------|------------------------|
| Total                     | 2.24819e-18 (1.00 )    | 2.24819e-18 (1.00 )    |
| Formation of rad19        | 2.24819e-18 (1.00 )    | 2.24819e-18 (1.00 )    |
| H-abstraction to cyc2enyl | 1.72361e-40 (7.67e-23) | 1.72361e-40 (7.67e-23) |
| H-abstraction to cyc1enyl | 2.48792e-59 (1.11e-41) | 2.48792e-59 (1.11e-41) |

| species        | PYtrue      | Cumul    | PYeffective | Cumul    |
|----------------|-------------|----------|-------------|----------|
| rad19anti      | 0.609228    | 0.609228 | 0.609228    | 0.609228 |
| rad9           | 0.390676    | 0.999904 | 0.390676    | 0.999904 |
| rad15          | 9.32197e-05 | 0.999997 | 9.32197e-05 | 0.999997 |
| rad12          | 2.31717e-06 | 1.000000 | 2.31717e-06 | 1.000000 |
| rad8           | 4.57762e-07 | 1.000000 | 4.57762e-07 | 1.000000 |
| Indene+H       | 3.84564e-07 | 1.000000 | 3.84564e-07 | 1.000000 |
| PhCHCCH2+H     | 6.40856e-10 | 1.000000 | 6.40856e-10 | 1.000000 |
| rad7           | 7.52765e-11 | 1.000000 | 7.52765e-11 | 1.000000 |
| rad11          | 3.14329e-11 | 1.000000 | 3.14329e-11 | 1.000000 |
| rad2           | 2.30278e-11 | 1.000000 | 2.30278e-11 | 1.000000 |
| rad1           | 2.69251e-12 | 1.000000 | 2.69251e-12 | 1.000000 |
| rad26          | 2.59954e-12 | 1.000000 | 2.59954e-12 | 1.000000 |
| rad18          | 2.58025e-12 | 1.000000 | 2.58025e-12 | 1.000000 |
| rad21          | 1.21509e-12 | 1.000000 | 1.21509e-12 | 1.000000 |
| rad6           | 8.19670e-13 | 1.000000 | 8.19670e-13 | 1.000000 |
| rad20          | 3.04135e-13 | 1.000000 | 3.04135e-13 | 1.000000 |
| rad22          | 1.30947e-13 | 1.000000 | 1.30947e-13 | 1.000000 |
| rad5           | 9.72050e-14 | 1.000000 | 9.72050e-14 | 1.000000 |
| PhcycC3H3_A+H  | 3.25577e-14 | 1.000000 | 3.25577e-14 | 1.000000 |
| rad45          | 2.98620e-14 | 1.000000 | 2.98620e-14 | 1.000000 |
| rad67          | 2.65805e-14 | 1.000000 | 2.65805e-14 | 1.000000 |
| rad35          | 1.23194e-14 | 1.000000 | 1.23194e-14 | 1.000000 |
| rad36          | 2.73680e-15 | 1.000000 | 2.73680e-15 | 1.000000 |
| rad10          | 2.65838e-15 | 1.000000 | 2.65838e-15 | 1.000000 |
| C2H2+PhCH2     | 2.38385e-15 | 1.000000 | 2.38385e-15 | 1.000000 |
| rad24          | 1.18003e-15 | 1.000000 | 1.18003e-15 | 1.000000 |
| rad3           | 6.71151e-16 | 1.000000 | 6.71151e-16 | 1.000000 |
| rad4           | 4.17749e-16 | 1.000000 | 4.17749e-16 | 1.000000 |
| PhCCCH3+H      | 1.67834e-16 | 1.000000 | 1.67834e-16 | 1.000000 |
| Phenyl+cycC3H4 | 1.16100e-16 | 1.000000 | 0.000000    | 1.000000 |
| Ph+MeAc        | 9.98569e-17 | 1.000000 | 9.98569e-17 | 1.000000 |
| rad23          | 7.90622e-17 | 1.000000 | 7.90622e-17 | 1.000000 |
| rad25          | 6.94627e-17 | 1.000000 | 6.94627e-17 | 1.000000 |
| PhCCH+CH3      | 4.60824e-17 | 1.000000 | 4.60824e-17 | 1.000000 |
| Ph+Allene      | 4.13990e-17 | 1.000000 | 4.13990e-17 | 1.000000 |
| rad27          | 3.06732e-17 | 1.000000 | 3.06732e-17 | 1.000000 |
| rad13          | 1.24985e-17 | 1.000000 | 1.24985e-17 | 1.000000 |
| PhCH2CCH+H     | 5.95638e-18 | 1.000000 | 5.95638e-18 | 1.000000 |



|                               |             |         |             |         |
|-------------------------------|-------------|---------|-------------|---------|
| rad30                         | 5.71508e-18 | 1.00000 | 5.71508e-18 | 1.00000 |
| rad33                         | 1.88665e-19 | 1.00000 | 1.88665e-19 | 1.00000 |
| rad37                         | 4.14882e-20 | 1.00000 | 4.14882e-20 | 1.00000 |
| PhcycC3H3_B+H                 | 1.83728e-20 | 1.00000 | 1.83728e-20 | 1.00000 |
| rad28                         | 1.67181e-20 | 1.00000 | 1.67181e-20 | 1.00000 |
| rad60syn                      | 1.42610e-20 | 1.00000 | 1.42610e-20 | 1.00000 |
| rad60anti                     | 6.68299e-21 | 1.00000 | 6.68299e-21 | 1.00000 |
| rad14                         | 4.72106e-21 | 1.00000 | 4.72106e-21 | 1.00000 |
| PAH3+H                        | 3.53682e-21 | 1.00000 | 3.53682e-21 | 1.00000 |
| rad31                         | 3.15496e-21 | 1.00000 | 3.15496e-21 | 1.00000 |
| rad59                         | 7.74206e-22 | 1.00000 | 7.74206e-22 | 1.00000 |
| PAH7+H                        | 7.48174e-22 | 1.00000 | 7.48174e-22 | 1.00000 |
| rad38                         | 1.13327e-22 | 1.00000 | 1.13327e-22 | 1.00000 |
| Benzene+cycloprop-2-enylidene | 7.66665e-23 | 1.00000 | 7.66665e-23 | 1.00000 |
| PAH10+CH3                     | 2.18055e-23 | 1.00000 | 2.18055e-23 | 1.00000 |
| rad46                         | 2.13209e-24 | 1.00000 | 2.13209e-24 | 1.00000 |
| rad43                         | 1.41413e-25 | 1.00000 | 1.41413e-25 | 1.00000 |
| PAH9+H                        | 7.61311e-26 | 1.00000 | 7.61311e-26 | 1.00000 |
| rad58                         | 1.55745e-26 | 1.00000 | 1.55745e-26 | 1.00000 |
| rad70                         | 7.30283e-27 | 1.00000 | 7.30283e-27 | 1.00000 |
| rad50                         | 6.55690e-27 | 1.00000 | 6.55690e-27 | 1.00000 |
| rad39                         | 9.91844e-28 | 1.00000 | 9.91844e-28 | 1.00000 |
| PAH1+H                        | 5.58499e-28 | 1.00000 | 5.58499e-28 | 1.00000 |
| rad19syn                      | 2.67716e-28 | 1.00000 | 2.67716e-28 | 1.00000 |
| rad54                         | 1.72205e-28 | 1.00000 | 1.72205e-28 | 1.00000 |
| rad34                         | 4.84662e-29 | 1.00000 | 4.84662e-29 | 1.00000 |
| rad52                         | 2.61974e-29 | 1.00000 | 2.61974e-29 | 1.00000 |
| rad62                         | 7.54753e-30 | 1.00000 | 7.54753e-30 | 1.00000 |
| rad51                         | 4.52525e-30 | 1.00000 | 4.52525e-30 | 1.00000 |
| rad55                         | 8.20840e-31 | 1.00000 | 8.20840e-31 | 1.00000 |
| rad41                         | 6.91011e-31 | 1.00000 | 6.91011e-31 | 1.00000 |
| rad47                         | 8.26971e-32 | 1.00000 | 8.26971e-32 | 1.00000 |
| rad42                         | 1.87491e-34 | 1.00000 | 1.87491e-34 | 1.00000 |
| rad65                         | 5.20112e-35 | 1.00000 | 5.20112e-35 | 1.00000 |
| rad53                         | 1.16686e-38 | 1.00000 | 1.16686e-38 | 1.00000 |
| rad61                         | 3.86453e-39 | 1.00000 | 3.86453e-39 | 1.00000 |
| Benzene+cycloprop-1-enylidene | 1.10663e-41 | 1.00000 | 1.10663e-41 | 1.00000 |
| rad68syn                      | 1.29711e-42 | 1.00000 | 1.29711e-42 | 1.00000 |
| rad68anti                     | 1.05604e-42 | 1.00000 | 1.05604e-42 | 1.00000 |
| rad64                         | 4.44239e-43 | 1.00000 | 4.44239e-43 | 1.00000 |
| rad56                         | 2.23116e-45 | 1.00000 | 2.23116e-45 | 1.00000 |
| rad40syn                      | 5.67201e-48 | 1.00000 | 5.67201e-48 | 1.00000 |
| rad40anti                     | 4.36383e-48 | 1.00000 | 4.36383e-48 | 1.00000 |
| rad73                         | 2.17676e-50 | 1.00000 | 2.17676e-50 | 1.00000 |
| PAH8+H                        | 1.34924e-50 | 1.00000 | 1.34924e-50 | 1.00000 |
| rad71                         | 1.33882e-55 | 1.00000 | 1.33882e-55 | 1.00000 |

1000000.00 Pa, 50.0000000 K

=====

| Rate constant             | True (fraction)        | Effective (fraction)   |
|---------------------------|------------------------|------------------------|
| Total                     | 1.72707e-17 (1.00 )    | 1.72707e-17 (1.00 )    |
| Formation of rad19        | 1.72707e-17 (1.00 )    | 1.72707e-17 (1.00 )    |
| H-abstraction to cyc2enyl | 5.49905e-35 (3.18e-18) | 5.49905e-35 (3.18e-18) |
| H-abstraction to cyc1enyl | 4.93090e-50 (2.86e-33) | 4.93090e-50 (2.86e-33) |

| species       | PYtrue      | Cumul    | PYeffective | Cumul    |
|---------------|-------------|----------|-------------|----------|
| rad19anti     | 0.522788    | 0.522788 | 0.522788    | 0.522788 |
| rad9          | 0.477057    | 0.999845 | 0.477057    | 0.999845 |
| rad15         | 0.000151956 | 0.999997 | 0.000151956 | 0.999997 |
| rad12         | 2.03045e-06 | 0.999999 | 2.03045e-06 | 0.999999 |
| Indene+H      | 8.43007e-07 | 1.000000 | 8.43007e-07 | 1.000000 |
| rad8          | 5.09505e-08 | 1.000000 | 5.09505e-08 | 1.000000 |
| PhCHCCH2+H    | 1.10517e-09 | 1.000000 | 1.10517e-09 | 1.000000 |
| rad7          | 7.87851e-11 | 1.000000 | 7.87851e-11 | 1.000000 |
| rad11         | 5.43277e-11 | 1.000000 | 5.43277e-11 | 1.000000 |
| rad2          | 4.00379e-11 | 1.000000 | 4.00379e-11 | 1.000000 |
| rad18         | 5.73559e-12 | 1.000000 | 5.73559e-12 | 1.000000 |
| rad26         | 4.85409e-12 | 1.000000 | 4.85409e-12 | 1.000000 |
| rad1          | 4.43399e-12 | 1.000000 | 4.43399e-12 | 1.000000 |
| rad21         | 1.95105e-12 | 1.000000 | 1.95105e-12 | 1.000000 |
| rad6          | 1.23857e-12 | 1.000000 | 1.23857e-12 | 1.000000 |
| rad20         | 6.35476e-13 | 1.000000 | 6.35476e-13 | 1.000000 |
| rad22         | 2.91930e-13 | 1.000000 | 2.91930e-13 | 1.000000 |
| rad5          | 1.13775e-13 | 1.000000 | 1.13775e-13 | 1.000000 |
| rad45         | 6.74773e-14 | 1.000000 | 6.74773e-14 | 1.000000 |
| rad67         | 6.11511e-14 | 1.000000 | 6.11511e-14 | 1.000000 |
| PhcycC3H3_A+H | 5.01459e-14 | 1.000000 | 5.01459e-14 | 1.000000 |
| rad35         | 2.82919e-14 | 1.000000 | 2.82919e-14 | 1.000000 |

|                               |             |          |             |          |
|-------------------------------|-------------|----------|-------------|----------|
| C2H2+PhCH2                    | 6.72504e-15 | 1.000000 | 6.72504e-15 | 1.000000 |
| rad10                         | 6.18359e-15 | 1.000000 | 6.18359e-15 | 1.000000 |
| rad36                         | 5.88024e-15 | 1.000000 | 5.88024e-15 | 1.000000 |
| rad3                          | 1.57398e-15 | 1.000000 | 1.57398e-15 | 1.000000 |
| rad24                         | 1.49905e-15 | 1.000000 | 1.49905e-15 | 1.000000 |
| rad4                          | 9.63474e-16 | 1.000000 | 9.63474e-16 | 1.000000 |
| PhCCCH3+H                     | 3.92958e-16 | 1.000000 | 3.92958e-16 | 1.000000 |
| rad23                         | 2.43333e-16 | 1.000000 | 2.43333e-16 | 1.000000 |
| Phenyl+cycC3H4                | 2.34401e-16 | 1.000000 | 0.00000     | 1.000000 |
| Ph+MeAc                       | 2.33170e-16 | 1.000000 | 2.33170e-16 | 1.000000 |
| rad25                         | 1.60435e-16 | 1.000000 | 1.60435e-16 | 1.000000 |
| Ph+Allene                     | 9.80851e-17 | 1.000000 | 9.80851e-17 | 1.000000 |
| PhCCH+CH3                     | 7.42049e-17 | 1.000000 | 7.42049e-17 | 1.000000 |
| rad27                         | 7.09579e-17 | 1.000000 | 7.09579e-17 | 1.000000 |
| rad13                         | 2.35224e-17 | 1.000000 | 2.35224e-17 | 1.000000 |
| rad30                         | 1.72980e-17 | 1.000000 | 1.72980e-17 | 1.000000 |
| PhCH2CCH+H                    | 1.42483e-17 | 1.000000 | 1.42483e-17 | 1.000000 |
| Benzene+cycloprop-2-enylidene | 3.18404e-18 | 1.000000 | 3.18404e-18 | 1.000000 |
| rad33                         | 3.22186e-19 | 1.000000 | 3.22186e-19 | 1.000000 |
| rad37                         | 1.09754e-19 | 1.000000 | 1.09754e-19 | 1.000000 |
| PhcycC3H3_B+H                 | 5.11918e-20 | 1.000000 | 5.11918e-20 | 1.000000 |
| rad60syn                      | 4.38535e-20 | 1.000000 | 4.38535e-20 | 1.000000 |
| rad28                         | 4.38522e-20 | 1.000000 | 4.38522e-20 | 1.000000 |
| rad60anti                     | 2.05792e-20 | 1.000000 | 2.05792e-20 | 1.000000 |
| rad14                         | 1.48699e-20 | 1.000000 | 1.48699e-20 | 1.000000 |
| PAH3+H                        | 1.10780e-20 | 1.000000 | 1.10780e-20 | 1.000000 |
| rad31                         | 4.19995e-21 | 1.000000 | 4.19995e-21 | 1.000000 |
| rad59                         | 2.41918e-21 | 1.000000 | 2.41918e-21 | 1.000000 |
| PAH7+H                        | 2.17495e-21 | 1.000000 | 2.17495e-21 | 1.000000 |
| rad38                         | 3.35072e-22 | 1.000000 | 3.35072e-22 | 1.000000 |
| PAH10+CH3                     | 6.12524e-23 | 1.000000 | 6.12524e-23 | 1.000000 |
| rad46                         | 7.20509e-24 | 1.000000 | 7.20509e-24 | 1.000000 |
| rad43                         | 4.71104e-25 | 1.000000 | 4.71104e-25 | 1.000000 |
| PAH9+H                        | 3.26241e-25 | 1.000000 | 3.26241e-25 | 1.000000 |
| rad58                         | 5.22688e-26 | 1.000000 | 5.22688e-26 | 1.000000 |
| rad70                         | 2.47363e-26 | 1.000000 | 2.47363e-26 | 1.000000 |
| rad50                         | 2.31171e-26 | 1.000000 | 2.31171e-26 | 1.000000 |
| rad39                         | 3.61434e-27 | 1.000000 | 3.61434e-27 | 1.000000 |
| PAH1+H                        | 1.70724e-27 | 1.000000 | 1.70724e-27 | 1.000000 |
| rad54                         | 4.47703e-28 | 1.000000 | 4.47703e-28 | 1.000000 |
| rad34                         | 1.72580e-28 | 1.000000 | 1.72580e-28 | 1.000000 |
| rad52                         | 9.66565e-29 | 1.000000 | 9.66565e-29 | 1.000000 |
| rad62                         | 3.44913e-29 | 1.000000 | 3.44913e-29 | 1.000000 |
| rad19syn                      | 2.20322e-29 | 1.000000 | 2.20322e-29 | 1.000000 |
| rad51                         | 1.72447e-29 | 1.000000 | 1.72447e-29 | 1.000000 |
| rad41                         | 2.70058e-30 | 1.000000 | 2.70058e-30 | 1.000000 |
| rad55                         | 2.20010e-30 | 1.000000 | 2.20010e-30 | 1.000000 |
| rad47                         | 3.26513e-31 | 1.000000 | 3.26513e-31 | 1.000000 |
| Benzene+cycloprop-1-enylidene | 2.85507e-33 | 1.000000 | 2.85507e-33 | 1.000000 |
| rad42                         | 9.84584e-34 | 1.000000 | 9.84584e-34 | 1.000000 |
| rad65                         | 2.46103e-34 | 1.000000 | 2.46103e-34 | 1.000000 |
| rad53                         | 5.41027e-38 | 1.000000 | 5.41027e-38 | 1.000000 |
| rad61                         | 2.19759e-38 | 1.000000 | 2.19759e-38 | 1.000000 |
| rad68syn                      | 9.95165e-42 | 1.000000 | 9.95165e-42 | 1.000000 |
| rad68anti                     | 8.09234e-42 | 1.000000 | 8.09234e-42 | 1.000000 |
| rad64                         | 2.76961e-42 | 1.000000 | 2.76961e-42 | 1.000000 |
| rad56                         | 1.72150e-44 | 1.000000 | 1.72150e-44 | 1.000000 |
| rad40syn                      | 5.80255e-47 | 1.000000 | 5.80255e-47 | 1.000000 |
| rad40anti                     | 4.47008e-47 | 1.000000 | 4.47008e-47 | 1.000000 |
| rad73                         | 2.59550e-49 | 1.000000 | 2.59550e-49 | 1.000000 |
| PAH8+H                        | 1.55070e-49 | 1.000000 | 1.55070e-49 | 1.000000 |
| rad71                         | 1.96060e-54 | 1.000000 | 1.96060e-54 | 1.000000 |

1000000.00 Pa, 60.0000000 K

| Rate constant             | True (fraction)        | Effective (fraction)   |
|---------------------------|------------------------|------------------------|
| Total                     | 6.93738e-17 (1.00 )    | 6.93738e-17 (1.00 )    |
| Formation of rad19        | 6.93738e-17 (1.000 )   | 6.93738e-17 (1.000 )   |
| H-abstraction to cyc2enyl | 2.50609e-31 (3.61e-15) | 2.50609e-31 (3.61e-15) |
| H-abstraction to cyclenyl | 7.62015e-44 (1.10e-27) | 7.62015e-44 (1.10e-27) |

  

| species   | PYtrue      | Cumul    | PYeffective | Cumul    |
|-----------|-------------|----------|-------------|----------|
| rad9      | 0.548967    | 0.548967 | 0.548967    | 0.548967 |
| rad19anti | 0.450811    | 0.999778 | 0.450811    | 0.999778 |
| rad15     | 0.000218771 | 0.999997 | 0.000218771 | 0.999997 |
| rad12     | 1.81032e-06 | 0.999999 | 1.81032e-06 | 0.999999 |
| Indene+H  | 1.53106e-06 | 1.00000  | 1.53106e-06 | 1.00000  |
| rad8      | 7.26416e-09 | 1.00000  | 7.26416e-09 | 1.00000  |

|                               |             |         |             |         |
|-------------------------------|-------------|---------|-------------|---------|
| PhCHCCH2+H                    | 1.68604e-09 | 1.00000 | 1.68604e-09 | 1.00000 |
| rad11                         | 8.30518e-11 | 1.00000 | 8.30518e-11 | 1.00000 |
| rad7                          | 8.27449e-11 | 1.00000 | 8.27449e-11 | 1.00000 |
| rad2                          | 6.15334e-11 | 1.00000 | 6.15334e-11 | 1.00000 |
| rad18                         | 1.05787e-11 | 1.00000 | 1.05787e-11 | 1.00000 |
| rad26                         | 7.79720e-12 | 1.00000 | 7.79720e-12 | 1.00000 |
| rad1                          | 6.55372e-12 | 1.00000 | 6.55372e-12 | 1.00000 |
| rad21                         | 2.79550e-12 | 1.00000 | 2.79550e-12 | 1.00000 |
| rad6                          | 1.77318e-12 | 1.00000 | 1.77318e-12 | 1.00000 |
| rad20                         | 1.11743e-12 | 1.00000 | 1.11743e-12 | 1.00000 |
| rad22                         | 5.42967e-13 | 1.00000 | 5.42967e-13 | 1.00000 |
| rad5                          | 1.29192e-13 | 1.00000 | 1.29192e-13 | 1.00000 |
| rad45                         | 1.26022e-13 | 1.00000 | 1.26022e-13 | 1.00000 |
| rad67                         | 1.16907e-13 | 1.00000 | 1.16907e-13 | 1.00000 |
| PhcycC3H3_A+H                 | 7.40071e-14 | 1.00000 | 7.40071e-14 | 1.00000 |
| rad35                         | 5.39841e-14 | 1.00000 | 5.39841e-14 | 1.00000 |
| C2H2+PhCH2                    | 1.52237e-14 | 1.00000 | 1.52237e-14 | 1.00000 |
| rad10                         | 1.19447e-14 | 1.00000 | 1.19447e-14 | 1.00000 |
| rad36                         | 1.05923e-14 | 1.00000 | 1.05923e-14 | 1.00000 |
| Benzene+cycloprop-2-enylidene | 3.61245e-15 | 1.00000 | 3.61245e-15 | 1.00000 |
| rad3                          | 3.06118e-15 | 1.00000 | 3.06118e-15 | 1.00000 |
| rad4                          | 1.85119e-15 | 1.00000 | 1.85119e-15 | 1.00000 |
| rad24                         | 1.77765e-15 | 1.00000 | 1.77765e-15 | 1.00000 |
| PhCCCH3+H                     | 7.68061e-16 | 1.00000 | 7.68061e-16 | 1.00000 |
| rad23                         | 5.78993e-16 | 1.00000 | 5.78993e-16 | 1.00000 |
| Ph+MeAc                       | 4.56624e-16 | 1.00000 | 4.56624e-16 | 1.00000 |
| Phenyl+cycC3H4                | 4.40306e-16 | 1.00000 | 0.00000     | 1.00000 |
| rad25                         | 3.08091e-16 | 1.00000 | 3.08091e-16 | 1.00000 |
| Ph+Allene                     | 1.93566e-16 | 1.00000 | 1.93566e-16 | 1.00000 |
| rad27                         | 1.36416e-16 | 1.00000 | 1.36416e-16 | 1.00000 |
| PhCCH+CH3                     | 1.08615e-16 | 1.00000 | 1.08615e-16 | 1.00000 |
| rad30                         | 4.08537e-17 | 1.00000 | 4.08537e-17 | 1.00000 |
| rad13                         | 3.95737e-17 | 1.00000 | 3.95737e-17 | 1.00000 |
| PhCH2CCH+H                    | 2.84210e-17 | 1.00000 | 2.84210e-17 | 1.00000 |
| rad33                         | 4.95479e-19 | 1.00000 | 4.95479e-19 | 1.00000 |
| rad37                         | 2.33320e-19 | 1.00000 | 2.33320e-19 | 1.00000 |
| PhcycC3H3_B+H                 | 1.55403e-19 | 1.00000 | 1.55403e-19 | 1.00000 |
| rad60syn                      | 1.05399e-19 | 1.00000 | 1.05399e-19 | 1.00000 |
| rad28                         | 9.27494e-20 | 1.00000 | 9.27494e-20 | 1.00000 |
| rad60anti                     | 4.95371e-20 | 1.00000 | 4.95371e-20 | 1.00000 |
| rad14                         | 3.65573e-20 | 1.00000 | 3.65573e-20 | 1.00000 |
| PAH3+H                        | 2.71782e-20 | 1.00000 | 2.71782e-20 | 1.00000 |
| rad59                         | 5.91915e-21 | 1.00000 | 5.91915e-21 | 1.00000 |
| rad31                         | 5.39207e-21 | 1.00000 | 5.39207e-21 | 1.00000 |
| PAH7+H                        | 5.06379e-21 | 1.00000 | 5.06379e-21 | 1.00000 |
| rad38                         | 7.83864e-22 | 1.00000 | 7.83864e-22 | 1.00000 |
| PAH10+CH3                     | 1.38621e-22 | 1.00000 | 1.38621e-22 | 1.00000 |
| rad46                         | 1.85072e-23 | 1.00000 | 1.85072e-23 | 1.00000 |
| rad43                         | 1.23415e-24 | 1.00000 | 1.23415e-24 | 1.00000 |
| PAH9+H                        | 1.01576e-24 | 1.00000 | 1.01576e-24 | 1.00000 |
| rad58                         | 1.38650e-25 | 1.00000 | 1.38650e-25 | 1.00000 |
| rad70                         | 6.62891e-26 | 1.00000 | 6.62891e-26 | 1.00000 |
| rad50                         | 6.19203e-26 | 1.00000 | 6.19203e-26 | 1.00000 |
| rad39                         | 9.97373e-27 | 1.00000 | 9.97373e-27 | 1.00000 |
| PAH1+H                        | 4.23763e-27 | 1.00000 | 4.23763e-27 | 1.00000 |
| Benzene+cycloprop-1-enylidene | 1.09842e-27 | 1.00000 | 1.09842e-27 | 1.00000 |
| rad54                         | 9.85540e-28 | 1.00000 | 9.85540e-28 | 1.00000 |
| rad34                         | 4.89596e-28 | 1.00000 | 4.89596e-28 | 1.00000 |
| rad52                         | 2.69311e-28 | 1.00000 | 2.69311e-28 | 1.00000 |
| rad62                         | 1.16818e-28 | 1.00000 | 1.16818e-28 | 1.00000 |
| rad51                         | 4.96852e-29 | 1.00000 | 4.96852e-29 | 1.00000 |
| rad41                         | 8.46414e-30 | 1.00000 | 8.46414e-30 | 1.00000 |
| rad55                         | 5.01244e-30 | 1.00000 | 5.01244e-30 | 1.00000 |
| rad19syn                      | 4.46143e-30 | 1.00000 | 4.46143e-30 | 1.00000 |
| rad47                         | 9.85295e-31 | 1.00000 | 9.85295e-31 | 1.00000 |
| rad42                         | 3.90585e-33 | 1.00000 | 3.90585e-33 | 1.00000 |
| rad65                         | 8.58295e-34 | 1.00000 | 8.58295e-34 | 1.00000 |
| rad53                         | 2.35816e-37 | 1.00000 | 2.35816e-37 | 1.00000 |
| rad61                         | 1.22157e-37 | 1.00000 | 1.22157e-37 | 1.00000 |
| rad68syn                      | 7.37600e-41 | 1.00000 | 7.37600e-41 | 1.00000 |
| rad68anti                     | 5.98845e-41 | 1.00000 | 5.98845e-41 | 1.00000 |
| rad64                         | 1.48304e-41 | 1.00000 | 1.48304e-41 | 1.00000 |
| rad56                         | 1.27870e-43 | 1.00000 | 1.27870e-43 | 1.00000 |
| rad40syn                      | 6.14317e-46 | 1.00000 | 6.14317e-46 | 1.00000 |
| rad40anti                     | 4.73773e-46 | 1.00000 | 4.73773e-46 | 1.00000 |
| rad73                         | 2.91844e-48 | 1.00000 | 2.91844e-48 | 1.00000 |
| PAH8+H                        | 1.92589e-48 | 1.00000 | 1.92589e-48 | 1.00000 |
| rad71                         | 2.94082e-53 | 1.00000 | 2.94082e-53 | 1.00000 |

1000000.00 Pa, 70.0000000 K

=====

| Rate constant             | True (fraction)        | Effective (fraction)   |
|---------------------------|------------------------|------------------------|
| Total                     | 1.91520e-16 (1.00 )    | 1.91520e-16 (1.00 )    |
| Formation of rad19        | 1.91520e-16 (1.000 )   | 1.91520e-16 (1.000 )   |
| H-abstraction to cyc2enyl | 1.01125e-28 (5.28e-13) | 1.01125e-28 (5.28e-13) |
| H-abstraction to cyclenyl | 1.97822e-39 (1.03e-23) | 1.97822e-39 (1.03e-23) |

| species                       | PYtrue      | Cumul    | PYeffective | Cumul    |
|-------------------------------|-------------|----------|-------------|----------|
| rad9                          | 0.609457    | 0.609457 | 0.609457    | 0.609457 |
| rad19anti                     | 0.390247    | 0.999704 | 0.390247    | 0.999704 |
| rad15                         | 0.000291861 | 0.999996 | 0.000291861 | 0.999996 |
| Indene+H                      | 2.47709e-06 | 0.999998 | 2.47709e-06 | 0.999998 |
| rad12                         | 1.63800e-06 | 1.000000 | 1.63800e-06 | 1.000000 |
| PhCHCCH2+H                    | 2.38666e-09 | 1.000000 | 2.38666e-09 | 1.000000 |
| rad8                          | 1.26321e-09 | 1.000000 | 1.26321e-09 | 1.000000 |
| rad11                         | 1.17798e-10 | 1.000000 | 1.17798e-10 | 1.000000 |
| rad2                          | 8.77038e-11 | 1.000000 | 8.77038e-11 | 1.000000 |
| rad7                          | 8.71447e-11 | 1.000000 | 8.71447e-11 | 1.000000 |
| rad18                         | 1.74006e-11 | 1.000000 | 1.74006e-11 | 1.000000 |
| rad26                         | 1.14511e-11 | 1.000000 | 1.14511e-11 | 1.000000 |
| rad1                          | 9.06684e-12 | 1.000000 | 9.06684e-12 | 1.000000 |
| rad21                         | 3.74393e-12 | 1.000000 | 3.74393e-12 | 1.000000 |
| rad6                          | 2.45314e-12 | 1.000000 | 2.45314e-12 | 1.000000 |
| rad20                         | 1.76615e-12 | 1.000000 | 1.76615e-12 | 1.000000 |
| rad22                         | 9.04676e-13 | 1.000000 | 9.04676e-13 | 1.000000 |
| Benzene+cycloprop-2-enylidene | 5.28015e-13 | 1.000000 | 5.28015e-13 | 1.000000 |
| rad45                         | 2.09986e-13 | 1.000000 | 2.09986e-13 | 1.000000 |
| rad67                         | 1.99592e-13 | 1.000000 | 1.99592e-13 | 1.000000 |
| rad5                          | 1.44597e-13 | 1.000000 | 1.44597e-13 | 1.000000 |
| PhcycC3H3_A+H                 | 1.06504e-13 | 1.000000 | 1.06504e-13 | 1.000000 |
| rad35                         | 9.19779e-14 | 1.000000 | 9.19779e-14 | 1.000000 |
| C2H2+PhCH2                    | 2.99705e-14 | 1.000000 | 2.99705e-14 | 1.000000 |
| rad10                         | 2.05999e-14 | 1.000000 | 2.05999e-14 | 1.000000 |
| rad36                         | 1.71695e-14 | 1.000000 | 1.71695e-14 | 1.000000 |
| rad3                          | 5.31135e-15 | 1.000000 | 5.31135e-15 | 1.000000 |
| rad4                          | 3.18189e-15 | 1.000000 | 3.18189e-15 | 1.000000 |
| rad24                         | 2.03393e-15 | 1.000000 | 2.03393e-15 | 1.000000 |
| PhCCCH3+H                     | 1.34467e-15 | 1.000000 | 1.34467e-15 | 1.000000 |
| rad23                         | 1.17882e-15 | 1.000000 | 1.17882e-15 | 1.000000 |
| Ph+MeAc                       | 8.03126e-16 | 1.000000 | 8.03126e-16 | 1.000000 |
| Phenyl+cycC3H4                | 7.77764e-16 | 1.000000 | 0.000000    | 1.000000 |
| rad25                         | 5.28589e-16 | 1.000000 | 5.28589e-16 | 1.000000 |
| Ph+Allene                     | 3.41843e-16 | 1.000000 | 3.41843e-16 | 1.000000 |
| rad27                         | 2.34263e-16 | 1.000000 | 2.34263e-16 | 1.000000 |
| PhCCH+CH3                     | 1.50788e-16 | 1.000000 | 1.50788e-16 | 1.000000 |
| rad30                         | 8.29013e-17 | 1.000000 | 8.29013e-17 | 1.000000 |
| rad13                         | 6.21533e-17 | 1.000000 | 6.21533e-17 | 1.000000 |
| PhCH2CCH+H                    | 5.07811e-17 | 1.000000 | 5.07811e-17 | 1.000000 |
| rad33                         | 7.16136e-19 | 1.000000 | 7.16136e-19 | 1.000000 |
| PhcycC3H3_B+H                 | 5.09050e-19 | 1.000000 | 5.09050e-19 | 1.000000 |
| rad37                         | 4.35290e-19 | 1.000000 | 4.35290e-19 | 1.000000 |
| rad60syn                      | 2.17962e-19 | 1.000000 | 2.17962e-19 | 1.000000 |
| rad28                         | 1.72524e-19 | 1.000000 | 1.72524e-19 | 1.000000 |
| rad60anti                     | 1.02613e-19 | 1.000000 | 1.02613e-19 | 1.000000 |
| rad14                         | 7.73141e-20 | 1.000000 | 7.73141e-20 | 1.000000 |
| PAH3+H                        | 5.74779e-20 | 1.000000 | 5.74779e-20 | 1.000000 |
| rad59                         | 1.24811e-20 | 1.000000 | 1.24811e-20 | 1.000000 |
| PAH7+H                        | 1.03156e-20 | 1.000000 | 1.03156e-20 | 1.000000 |
| rad31                         | 6.75283e-21 | 1.000000 | 6.75283e-21 | 1.000000 |
| rad38                         | 1.59218e-21 | 1.000000 | 1.59218e-21 | 1.000000 |
| PAH10+CH3                     | 2.76133e-22 | 1.000000 | 2.76133e-22 | 1.000000 |
| rad46                         | 4.03383e-23 | 1.000000 | 4.03383e-23 | 1.000000 |
| Benzene+cycloprop-1-enylidene | 1.03290e-23 | 1.000000 | 1.03290e-23 | 1.000000 |
| rad43                         | 2.79957e-24 | 1.000000 | 2.79957e-24 | 1.000000 |
| PAH9+H                        | 2.60562e-24 | 1.000000 | 2.60562e-24 | 1.000000 |
| rad58                         | 3.19479e-25 | 1.000000 | 3.19479e-25 | 1.000000 |
| rad70                         | 1.54477e-25 | 1.000000 | 1.54477e-25 | 1.000000 |
| rad50                         | 1.40808e-25 | 1.000000 | 1.40808e-25 | 1.000000 |
| rad39                         | 2.33231e-26 | 1.000000 | 2.33231e-26 | 1.000000 |
| PAH1+H                        | 9.32035e-27 | 1.000000 | 9.32035e-27 | 1.000000 |
| rad54                         | 1.96841e-27 | 1.000000 | 1.96841e-27 | 1.000000 |
| rad34                         | 1.21462e-27 | 1.000000 | 1.21462e-27 | 1.000000 |
| rad52                         | 6.35606e-28 | 1.000000 | 6.35606e-28 | 1.000000 |
| rad62                         | 3.31052e-28 | 1.000000 | 3.31052e-28 | 1.000000 |
| rad51                         | 1.21452e-28 | 1.000000 | 1.21452e-28 | 1.000000 |
| rad41                         | 2.33150e-29 | 1.000000 | 2.33150e-29 | 1.000000 |
| rad55                         | 1.03990e-29 | 1.000000 | 1.03990e-29 | 1.000000 |
| rad47                         | 2.53515e-30 | 1.000000 | 2.53515e-30 | 1.000000 |

|           |             |          |             |          |
|-----------|-------------|----------|-------------|----------|
| rad19syn  | 1.95173e-30 | 1.000000 | 1.95173e-30 | 1.000000 |
| rad42     | 1.31619e-32 | 1.000000 | 1.31619e-32 | 1.000000 |
| rad65     | 2.49630e-33 | 1.000000 | 2.49630e-33 | 1.000000 |
| rad53     | 1.01273e-36 | 1.000000 | 1.01273e-36 | 1.000000 |
| rad61     | 6.99064e-37 | 1.000000 | 6.99064e-37 | 1.000000 |
| rad68syn  | 5.61298e-40 | 1.000000 | 5.61298e-40 | 1.000000 |
| rad68anti | 4.54847e-40 | 1.000000 | 4.54847e-40 | 1.000000 |
| rad64     | 7.44797e-41 | 1.000000 | 7.44797e-41 | 1.000000 |
| rad56     | 9.66780e-43 | 1.000000 | 9.66780e-43 | 1.000000 |
| rad40syn  | 7.02165e-45 | 1.000000 | 7.02165e-45 | 1.000000 |
| rad40anti | 5.41999e-45 | 1.000000 | 5.41999e-45 | 1.000000 |
| rad73     | 3.36008e-47 | 1.000000 | 3.36008e-47 | 1.000000 |
| PAH8+H    | 2.68142e-47 | 1.000000 | 2.68142e-47 | 1.000000 |
| rad71     | 4.82745e-52 | 1.000000 | 4.82745e-52 | 1.000000 |

1000000.00 Pa, 80.0000000 K

| Rate constant             | True (fraction)        | Effective (fraction)   |
|---------------------------|------------------------|------------------------|
| Total                     | 4.17084e-16 (1.00 )    | 4.17084e-16 (1.00 )    |
| Formation of rad19        | 4.17084e-16 (1.000 )   | 4.17084e-16 (1.000 )   |
| H-abstraction to cyc2enyl | 8.98751e-27 (2.15e-11) | 8.98751e-27 (2.15e-11) |
| H-abstraction to cyclenyl | 4.00120e-36 (9.59e-21) | 4.00120e-36 (9.59e-21) |

| species                       | PYtrue      | Cumul    | PYeffective | Cumul    |
|-------------------------------|-------------|----------|-------------|----------|
| rad9                          | 0.660766    | 0.660766 | 0.660766    | 0.660766 |
| rad19anti                     | 0.338859    | 0.999625 | 0.338859    | 0.999625 |
| rad15                         | 0.000369965 | 0.999995 | 0.000369965 | 0.999995 |
| Indene+H                      | 3.70819e-06 | 0.999999 | 3.70819e-06 | 0.999999 |
| rad12                         | 1.49932e-06 | 1.00000  | 1.49932e-06 | 1.00000  |
| PhCHCCH2+H                    | 3.21424e-09 | 1.00000  | 3.21424e-09 | 1.00000  |
| rad8                          | 2.58608e-10 | 1.00000  | 2.58608e-10 | 1.00000  |
| rad11                         | 1.58962e-10 | 1.00000  | 1.58962e-10 | 1.00000  |
| rad2                          | 1.18896e-10 | 1.00000  | 1.18896e-10 | 1.00000  |
| rad7                          | 9.20148e-11 | 1.00000  | 9.20148e-11 | 1.00000  |
| rad18                         | 2.65094e-11 | 1.00000  | 2.65094e-11 | 1.00000  |
| Benzene+cycloprop-2-enylidene | 2.15484e-11 | 1.00000  | 2.15484e-11 | 1.00000  |
| rad26                         | 1.58614e-11 | 1.00000  | 1.58614e-11 | 1.00000  |
| rad1                          | 1.20041e-11 | 1.00000  | 1.20041e-11 | 1.00000  |
| rad21                         | 4.80131e-12 | 1.00000  | 4.80131e-12 | 1.00000  |
| rad6                          | 3.31360e-12 | 1.00000  | 3.31360e-12 | 1.00000  |
| rad20                         | 2.59969e-12 | 1.00000  | 2.59969e-12 | 1.00000  |
| rad22                         | 1.40164e-12 | 1.00000  | 1.40164e-12 | 1.00000  |
| rad45                         | 3.24692e-13 | 1.00000  | 3.24692e-13 | 1.00000  |
| rad67                         | 3.16054e-13 | 1.00000  | 3.16054e-13 | 1.00000  |
| rad5                          | 1.60746e-13 | 1.00000  | 1.60746e-13 | 1.00000  |
| PhcycC3H3_A+H                 | 1.50919e-13 | 1.00000  | 1.50919e-13 | 1.00000  |
| rad35                         | 1.45334e-13 | 1.00000  | 1.45334e-13 | 1.00000  |
| C2H2+PhCH2                    | 5.36786e-14 | 1.00000  | 5.36786e-14 | 1.00000  |
| rad10                         | 3.29502e-14 | 1.00000  | 3.29502e-14 | 1.00000  |
| rad36                         | 2.59729e-14 | 1.00000  | 2.59729e-14 | 1.00000  |
| rad3                          | 8.54359e-15 | 1.00000  | 8.54359e-15 | 1.00000  |
| rad4                          | 5.07973e-15 | 1.00000  | 5.07973e-15 | 1.00000  |
| rad24                         | 2.28017e-15 | 1.00000  | 2.28017e-15 | 1.00000  |
| PhCCCH3+H                     | 2.18885e-15 | 1.00000  | 2.18885e-15 | 1.00000  |
| rad23                         | 2.16522e-15 | 1.00000  | 2.16522e-15 | 1.00000  |
| Ph+MeAc                       | 1.31581e-15 | 1.00000  | 1.31581e-15 | 1.00000  |
| Phenyl+cycC3H4                | 1.30842e-15 | 1.00000  | 0.00000     | 1.00000  |
| rad25                         | 8.41488e-16 | 1.00000  | 8.41488e-16 | 1.00000  |
| Ph+Allene                     | 5.61117e-16 | 1.00000  | 5.61117e-16 | 1.00000  |
| rad27                         | 3.73257e-16 | 1.00000  | 3.73257e-16 | 1.00000  |
| PhCCH+CH3                     | 2.02982e-16 | 1.00000  | 2.02982e-16 | 1.00000  |
| rad30                         | 1.52051e-16 | 1.00000  | 1.52051e-16 | 1.00000  |
| rad13                         | 9.31929e-17 | 1.00000  | 9.31929e-17 | 1.00000  |
| PhCH2CCH+H                    | 8.44103e-17 | 1.00000  | 8.44103e-17 | 1.00000  |
| PhcycC3H3_B+H                 | 1.74189e-18 | 1.00000  | 1.74189e-18 | 1.00000  |
| rad33                         | 9.94089e-19 | 1.00000  | 9.94089e-19 | 1.00000  |
| rad37                         | 7.45990e-19 | 1.00000  | 7.45990e-19 | 1.00000  |
| rad60syn                      | 4.07967e-19 | 1.00000  | 4.07967e-19 | 1.00000  |
| rad28                         | 2.95242e-19 | 1.00000  | 2.95242e-19 | 1.00000  |
| rad60anti                     | 1.92410e-19 | 1.00000  | 1.92410e-19 | 1.00000  |
| rad14                         | 1.48048e-19 | 1.00000  | 1.48048e-19 | 1.00000  |
| PAH3+H                        | 1.10224e-19 | 1.00000  | 1.10224e-19 | 1.00000  |
| rad59                         | 2.38572e-20 | 1.00000  | 2.38572e-20 | 1.00000  |
| PAH7+H                        | 1.92593e-20 | 1.00000  | 1.92593e-20 | 1.00000  |
| Benzene+cycloprop-1-enylidene | 9.59328e-21 | 1.00000  | 9.59328e-21 | 1.00000  |
| rad31                         | 8.31157e-21 | 1.00000  | 8.31157e-21 | 1.00000  |
| rad38                         | 2.94829e-21 | 1.00000  | 2.94829e-21 | 1.00000  |
| PAH10+CH3                     | 5.07071e-22 | 1.00000  | 5.07071e-22 | 1.00000  |

|           |             |         |             |         |
|-----------|-------------|---------|-------------|---------|
| rad46     | 7.90024e-23 | 1.00000 | 7.90024e-23 | 1.00000 |
| PAH9+H    | 5.88423e-24 | 1.00000 | 5.88423e-24 | 1.00000 |
| rad43     | 5.78744e-24 | 1.00000 | 5.78744e-24 | 1.00000 |
| rad58     | 6.72373e-25 | 1.00000 | 6.72373e-25 | 1.00000 |
| rad70     | 3.29215e-25 | 1.00000 | 3.29215e-25 | 1.00000 |
| rad50     | 2.88091e-25 | 1.00000 | 2.88091e-25 | 1.00000 |
| rad39     | 4.90242e-26 | 1.00000 | 4.90242e-26 | 1.00000 |
| PAH1+H    | 1.90184e-26 | 1.00000 | 1.90184e-26 | 1.00000 |
| rad54     | 3.70071e-27 | 1.00000 | 3.70071e-27 | 1.00000 |
| rad34     | 2.76967e-27 | 1.00000 | 2.76967e-27 | 1.00000 |
| rad52     | 1.34907e-27 | 1.00000 | 1.34907e-27 | 1.00000 |
| rad62     | 8.37268e-28 | 1.00000 | 8.37268e-28 | 1.00000 |
| rad51     | 2.67525e-28 | 1.00000 | 2.67525e-28 | 1.00000 |
| rad41     | 5.92619e-29 | 1.00000 | 5.92619e-29 | 1.00000 |
| rad55     | 2.03844e-29 | 1.00000 | 2.03844e-29 | 1.00000 |
| rad47     | 5.88741e-30 | 1.00000 | 5.88741e-30 | 1.00000 |
| rad19syn  | 1.43904e-30 | 1.00000 | 1.43904e-30 | 1.00000 |
| rad42     | 4.01041e-32 | 1.00000 | 4.01041e-32 | 1.00000 |
| rad65     | 6.46839e-33 | 1.00000 | 6.46839e-33 | 1.00000 |
| rad53     | 4.31810e-36 | 1.00000 | 4.31810e-36 | 1.00000 |
| rad61     | 4.21378e-36 | 1.00000 | 4.21378e-36 | 1.00000 |
| rad68syn  | 4.51451e-39 | 1.00000 | 4.51451e-39 | 1.00000 |
| rad68anti | 3.65033e-39 | 1.00000 | 3.65033e-39 | 1.00000 |
| rad64     | 3.65190e-40 | 1.00000 | 3.65190e-40 | 1.00000 |
| rad56     | 7.70073e-42 | 1.00000 | 7.70073e-42 | 1.00000 |
| rad40syn  | 8.80231e-44 | 1.00000 | 8.80231e-44 | 1.00000 |
| rad40anti | 6.79889e-44 | 1.00000 | 6.79889e-44 | 1.00000 |
| PAH8+H    | 4.22935e-46 | 1.00000 | 4.22935e-46 | 1.00000 |
| rad73     | 4.10817e-46 | 1.00000 | 4.10817e-46 | 1.00000 |
| rad71     | 8.87878e-51 | 1.00000 | 8.87878e-51 | 1.00000 |

1000000.00 Pa, 90.0000000 K

| Rate constant             | True (fraction)        | Effective (fraction)   |
|---------------------------|------------------------|------------------------|
| Total                     | 7.74016e-16 (1.00 )    | 7.74016e-16 (1.00 )    |
| Formation of rad19        | 7.74016e-16 (1.000 )   | 7.74016e-16 (1.000 )   |
| H-abstraction to cyc2enyl | 2.91736e-25 (3.77e-10) | 2.91736e-25 (3.77e-10) |
| H-abstraction to cyc1enyl | 1.47814e-33 (1.91e-18) | 1.47814e-33 (1.91e-18) |

| species                       | PYtrue      | Cumul    | PYeffective | Cumul    |
|-------------------------------|-------------|----------|-------------|----------|
| rad9                          | 0.704576    | 0.704576 | 0.704576    | 0.704576 |
| rad19anti                     | 0.294966    | 0.999542 | 0.294966    | 0.999542 |
| rad15                         | 0.000452177 | 0.999994 | 0.000452177 | 0.999994 |
| Indene+H                      | 5.25218e-06 | 0.999999 | 5.25218e-06 | 0.999999 |
| rad12                         | 1.38498e-06 | 1.00000  | 1.38498e-06 | 1.00000  |
| PhCHCCH2+H                    | 4.17979e-09 | 1.00000  | 4.17979e-09 | 1.00000  |
| Benzene+cycloprop-2-enylidene | 3.76912e-10 | 1.00000  | 3.76912e-10 | 1.00000  |
| rad11                         | 2.07135e-10 | 1.00000  | 2.07135e-10 | 1.00000  |
| rad2                          | 1.55609e-10 | 1.00000  | 1.55609e-10 | 1.00000  |
| rad7                          | 9.74046e-11 | 1.00000  | 9.74046e-11 | 1.00000  |
| rad8                          | 6.07045e-11 | 1.00000  | 6.07045e-11 | 1.00000  |
| rad18                         | 3.82476e-11 | 1.00000  | 3.82476e-11 | 1.00000  |
| rad26                         | 2.10969e-11 | 1.00000  | 2.10969e-11 | 1.00000  |
| rad1                          | 1.54110e-11 | 1.00000  | 1.54110e-11 | 1.00000  |
| rad21                         | 5.97966e-12 | 1.00000  | 5.97966e-12 | 1.00000  |
| rad6                          | 4.39724e-12 | 1.00000  | 4.39724e-12 | 1.00000  |
| rad20                         | 3.63974e-12 | 1.00000  | 3.63974e-12 | 1.00000  |
| rad22                         | 2.06413e-12 | 1.00000  | 2.06413e-12 | 1.00000  |
| rad45                         | 4.76676e-13 | 1.00000  | 4.76676e-13 | 1.00000  |
| rad67                         | 4.74697e-13 | 1.00000  | 4.74697e-13 | 1.00000  |
| rad35                         | 2.17789e-13 | 1.00000  | 2.17789e-13 | 1.00000  |
| PhcycC3H3_A+H                 | 2.11833e-13 | 1.00000  | 2.11833e-13 | 1.00000  |
| rad5                          | 1.78248e-13 | 1.00000  | 1.78248e-13 | 1.00000  |
| C2H2+PhCH2                    | 8.99091e-14 | 1.00000  | 8.99091e-14 | 1.00000  |
| rad10                         | 4.99980e-14 | 1.00000  | 4.99980e-14 | 1.00000  |
| rad36                         | 3.74536e-14 | 1.00000  | 3.74536e-14 | 1.00000  |
| rad3                          | 1.30338e-14 | 1.00000  | 1.30338e-14 | 1.00000  |
| rad4                          | 7.70133e-15 | 1.00000  | 7.70133e-15 | 1.00000  |
| rad23                         | 3.70108e-15 | 1.00000  | 3.70108e-15 | 1.00000  |
| PhCCCH3+H                     | 3.38719e-15 | 1.00000  | 3.38719e-15 | 1.00000  |
| rad24                         | 2.52566e-15 | 1.00000  | 2.52566e-15 | 1.00000  |
| Phenyl+cycC3H4                | 2.11934e-15 | 1.00000  | 0.00000     | 1.00000  |
| Ph+MeAc                       | 2.05241e-15 | 1.00000  | 2.05241e-15 | 1.00000  |
| rad25                         | 1.27111e-15 | 1.00000  | 1.27111e-15 | 1.00000  |
| Ph+Allene                     | 8.75559e-16 | 1.00000  | 8.75559e-16 | 1.00000  |
| rad27                         | 5.64318e-16 | 1.00000  | 5.64318e-16 | 1.00000  |
| PhCCH+CH3                     | 2.68423e-16 | 1.00000  | 2.68423e-16 | 1.00000  |
| rad30                         | 2.59731e-16 | 1.00000  | 2.59731e-16 | 1.00000  |

|                               |             |         |             |         |
|-------------------------------|-------------|---------|-------------|---------|
| rad13                         | 1.35169e-16 | 1.00000 | 1.35169e-16 | 1.00000 |
| PhCH2CCH+H                    | 1.33509e-16 | 1.00000 | 1.33509e-16 | 1.00000 |
| PhcycC3H3_B+H                 | 5.87142e-18 | 1.00000 | 5.87142e-18 | 1.00000 |
| Benzene+cycloprop-1-enylidene | 1.90970e-18 | 1.00000 | 1.90970e-18 | 1.00000 |
| rad33                         | 1.34185e-18 | 1.00000 | 1.34185e-18 | 1.00000 |
| rad37                         | 1.20619e-18 | 1.00000 | 1.20619e-18 | 1.00000 |
| rad60syn                      | 7.12195e-19 | 1.00000 | 7.12195e-19 | 1.00000 |
| rad28                         | 4.77255e-19 | 1.00000 | 4.77255e-19 | 1.00000 |
| rad60anti                     | 3.36544e-19 | 1.00000 | 3.36544e-19 | 1.00000 |
| rad14                         | 2.64606e-19 | 1.00000 | 2.64606e-19 | 1.00000 |
| PAH3+H                        | 1.97513e-19 | 1.00000 | 1.97513e-19 | 1.00000 |
| rad59                         | 4.26002e-20 | 1.00000 | 4.26002e-20 | 1.00000 |
| PAH7+H                        | 3.38717e-20 | 1.00000 | 3.38717e-20 | 1.00000 |
| rad31                         | 1.01058e-20 | 1.00000 | 1.01058e-20 | 1.00000 |
| rad38                         | 5.12281e-21 | 1.00000 | 5.12281e-21 | 1.00000 |
| PAH10+CH3                     | 8.82137e-22 | 1.00000 | 8.82137e-22 | 1.00000 |
| rad46                         | 1.43782e-22 | 1.00000 | 1.43782e-22 | 1.00000 |
| PAH9+H                        | 1.21676e-23 | 1.00000 | 1.21676e-23 | 1.00000 |
| rad43                         | 1.12421e-23 | 1.00000 | 1.12421e-23 | 1.00000 |
| rad58                         | 1.33199e-24 | 1.00000 | 1.33199e-24 | 1.00000 |
| rad70                         | 6.61392e-25 | 1.00000 | 6.61392e-25 | 1.00000 |
| rad50                         | 5.48799e-25 | 1.00000 | 5.48799e-25 | 1.00000 |
| rad39                         | 9.59159e-26 | 1.00000 | 9.59159e-26 | 1.00000 |
| PAH1+H                        | 3.70020e-26 | 1.00000 | 3.70020e-26 | 1.00000 |
| rad54                         | 6.69585e-27 | 1.00000 | 6.69585e-27 | 1.00000 |
| rad34                         | 5.98226e-27 | 1.00000 | 5.98226e-27 | 1.00000 |
| rad52                         | 2.66770e-27 | 1.00000 | 2.66770e-27 | 1.00000 |
| rad62                         | 1.96458e-27 | 1.00000 | 1.96458e-27 | 1.00000 |
| rad51                         | 5.50311e-28 | 1.00000 | 5.50311e-28 | 1.00000 |
| rad41                         | 1.43136e-28 | 1.00000 | 1.43136e-28 | 1.00000 |
| rad55                         | 3.86103e-29 | 1.00000 | 3.86103e-29 | 1.00000 |
| rad47                         | 1.27555e-29 | 1.00000 | 1.27555e-29 | 1.00000 |
| rad19syn                      | 1.43159e-30 | 1.00000 | 1.43159e-30 | 1.00000 |
| rad42                         | 1.14743e-31 | 1.00000 | 1.14743e-31 | 1.00000 |
| rad65                         | 1.55416e-32 | 1.00000 | 1.55416e-32 | 1.00000 |
| rad61                         | 2.69224e-35 | 1.00000 | 2.69224e-35 | 1.00000 |
| rad53                         | 1.79978e-35 | 1.00000 | 1.79978e-35 | 1.00000 |
| rad68syn                      | 3.88796e-38 | 1.00000 | 3.88796e-38 | 1.00000 |
| rad68anti                     | 3.13585e-38 | 1.00000 | 3.13585e-38 | 1.00000 |
| rad64                         | 1.77397e-39 | 1.00000 | 1.77397e-39 | 1.00000 |
| rad56                         | 6.63237e-41 | 1.00000 | 6.63237e-41 | 1.00000 |
| rad40syn                      | 1.21688e-42 | 1.00000 | 1.21688e-42 | 1.00000 |
| rad40anti                     | 9.40328e-43 | 1.00000 | 9.40328e-43 | 1.00000 |
| PAH8+H                        | 7.56149e-45 | 1.00000 | 7.56149e-45 | 1.00000 |
| rad73                         | 5.42526e-45 | 1.00000 | 5.42526e-45 | 1.00000 |
| rad71                         | 1.84160e-49 | 1.00000 | 1.84160e-49 | 1.00000 |

1000000.00 Pa, 100.000000 K

=====

| Rate constant             | True (fraction)        | Effective (fraction)   |
|---------------------------|------------------------|------------------------|
| Total                     | 1.28255e-15 (1.00 )    | 1.28255e-15 (1.00 )    |
| Formation of rad19        | 1.28255e-15 (1.000 )   | 1.28255e-15 (1.000 )   |
| H-abstraction to cyc2enyl | 4.68359e-24 (3.65e-09) | 4.68359e-24 (3.65e-09) |
| H-abstraction to cyclenyl | 1.66242e-31 (1.30e-16) | 1.66242e-31 (1.30e-16) |

| species                       | PYtrue      | Cumul    | PYeffective | Cumul    |
|-------------------------------|-------------|----------|-------------|----------|
| rad9                          | 0.742183    | 0.742183 | 0.742183    | 0.742183 |
| rad19anti                     | 0.257271    | 0.999454 | 0.257271    | 0.999454 |
| rad15                         | 0.000537844 | 0.999992 | 0.000537844 | 0.999992 |
| Indene+H                      | 7.13904e-06 | 0.999999 | 7.13904e-06 | 0.999999 |
| rad12                         | 1.28880e-06 | 1.00000  | 1.28880e-06 | 1.00000  |
| PhCHCCH2+H                    | 5.29827e-09 | 1.00000  | 5.29827e-09 | 1.00000  |
| Benzene+cycloprop-2-enylidene | 3.65179e-09 | 1.00000  | 3.65179e-09 | 1.00000  |
| rad11                         | 2.63110e-10 | 1.00000  | 2.63110e-10 | 1.00000  |
| rad2                          | 1.98508e-10 | 1.00000  | 1.98508e-10 | 1.00000  |
| rad7                          | 1.03379e-10 | 1.00000  | 1.03379e-10 | 1.00000  |
| rad18                         | 5.30081e-11 | 1.00000  | 5.30081e-11 | 1.00000  |
| rad26                         | 2.72505e-11 | 1.00000  | 2.72505e-11 | 1.00000  |
| rad1                          | 1.93479e-11 | 1.00000  | 1.93479e-11 | 1.00000  |
| rad8                          | 1.60116e-11 | 1.00000  | 1.60116e-11 | 1.00000  |
| rad21                         | 7.29715e-12 | 1.00000  | 7.29715e-12 | 1.00000  |
| rad6                          | 5.75696e-12 | 1.00000  | 5.75696e-12 | 1.00000  |
| rad20                         | 4.91310e-12 | 1.00000  | 4.91310e-12 | 1.00000  |
| rad22                         | 2.93009e-12 | 1.00000  | 2.93009e-12 | 1.00000  |
| rad67                         | 6.86036e-13 | 1.00000  | 6.86036e-13 | 1.00000  |
| rad45                         | 6.74149e-13 | 1.00000  | 6.74149e-13 | 1.00000  |
| rad35                         | 3.13997e-13 | 1.00000  | 3.13997e-13 | 1.00000  |
| PhcycC3H3_A+H                 | 2.95695e-13 | 1.00000  | 2.95695e-13 | 1.00000  |

|                               |             |         |             |         |
|-------------------------------|-------------|---------|-------------|---------|
| rad5                          | 1.97681e-13 | 1.00000 | 1.97681e-13 | 1.00000 |
| C2H2+PhCH2                    | 1.43395e-13 | 1.00000 | 1.43395e-13 | 1.00000 |
| rad10                         | 7.30213e-14 | 1.00000 | 7.30213e-14 | 1.00000 |
| rad36                         | 5.21842e-14 | 1.00000 | 5.21842e-14 | 1.00000 |
| rad3                          | 1.91359e-14 | 1.00000 | 1.91359e-14 | 1.00000 |
| rad4                          | 1.12479e-14 | 1.00000 | 1.12479e-14 | 1.00000 |
| rad23                         | 6.00548e-15 | 1.00000 | 6.00548e-15 | 1.00000 |
| PhCCCH3+H                     | 5.05522e-15 | 1.00000 | 5.05522e-15 | 1.00000 |
| Phenyl+cycC3H4                | 3.33570e-15 | 1.00000 | 0.00000     | 1.00000 |
| Ph+MeAc                       | 3.09144e-15 | 1.00000 | 3.09144e-15 | 1.00000 |
| rad24                         | 2.77817e-15 | 1.00000 | 2.77817e-15 | 1.00000 |
| rad25                         | 1.84826e-15 | 1.00000 | 1.84826e-15 | 1.00000 |
| Ph+Allene                     | 1.31781e-15 | 1.00000 | 1.31781e-15 | 1.00000 |
| rad27                         | 8.21321e-16 | 1.00000 | 8.21321e-16 | 1.00000 |
| rad30                         | 4.21228e-16 | 1.00000 | 4.21228e-16 | 1.00000 |
| PhCCH+CH3                     | 3.51691e-16 | 1.00000 | 3.51691e-16 | 1.00000 |
| PhCH2CCH+H                    | 2.03897e-16 | 1.00000 | 2.03897e-16 | 1.00000 |
| rad13                         | 1.91275e-16 | 1.00000 | 1.91275e-16 | 1.00000 |
| Benzene+cycloprop-1-enylidene | 1.29619e-16 | 1.00000 | 1.29619e-16 | 1.00000 |
| PhcycC3H3_B+H                 | 1.85734e-17 | 1.00000 | 1.85734e-17 | 1.00000 |
| rad37                         | 1.87172e-18 | 1.00000 | 1.87172e-18 | 1.00000 |
| rad33                         | 1.77511e-18 | 1.00000 | 1.77511e-18 | 1.00000 |
| rad60syn                      | 1.18222e-18 | 1.00000 | 1.18222e-18 | 1.00000 |
| rad28                         | 7.41140e-19 | 1.00000 | 7.41140e-19 | 1.00000 |
| rad60anti                     | 5.59814e-19 | 1.00000 | 5.59814e-19 | 1.00000 |
| rad14                         | 4.50171e-19 | 1.00000 | 4.50171e-19 | 1.00000 |
| PAH3+H                        | 3.37228e-19 | 1.00000 | 3.37228e-19 | 1.00000 |
| rad59                         | 7.24561e-20 | 1.00000 | 7.24561e-20 | 1.00000 |
| PAH7+H                        | 5.71246e-20 | 1.00000 | 5.71246e-20 | 1.00000 |
| rad31                         | 1.21832e-20 | 1.00000 | 1.21832e-20 | 1.00000 |
| rad38                         | 8.50958e-21 | 1.00000 | 8.50958e-21 | 1.00000 |
| PAH10+CH3                     | 1.47982e-21 | 1.00000 | 1.47982e-21 | 1.00000 |
| rad46                         | 2.48470e-22 | 1.00000 | 2.48470e-22 | 1.00000 |
| PAH9+H                        | 2.36328e-23 | 1.00000 | 2.36328e-23 | 1.00000 |
| rad43                         | 2.09369e-23 | 1.00000 | 2.09369e-23 | 1.00000 |
| rad58                         | 2.53345e-24 | 1.00000 | 2.53345e-24 | 1.00000 |
| rad70                         | 1.27795e-24 | 1.00000 | 1.27795e-24 | 1.00000 |
| rad50                         | 9.95179e-25 | 1.00000 | 9.95179e-25 | 1.00000 |
| rad39                         | 1.78685e-25 | 1.00000 | 1.78685e-25 | 1.00000 |
| PAH1+H                        | 6.98851e-26 | 1.00000 | 6.98851e-26 | 1.00000 |
| rad34                         | 1.24866e-26 | 1.00000 | 1.24866e-26 | 1.00000 |
| rad54                         | 1.18331e-26 | 1.00000 | 1.18331e-26 | 1.00000 |
| rad52                         | 5.02872e-27 | 1.00000 | 5.02872e-27 | 1.00000 |
| rad62                         | 4.38827e-27 | 1.00000 | 4.38827e-27 | 1.00000 |
| rad51                         | 1.08208e-27 | 1.00000 | 1.08208e-27 | 1.00000 |
| rad41                         | 3.34992e-28 | 1.00000 | 3.34992e-28 | 1.00000 |
| rad55                         | 7.17428e-29 | 1.00000 | 7.17428e-29 | 1.00000 |
| rad47                         | 2.63253e-29 | 1.00000 | 2.63253e-29 | 1.00000 |
| rad19syn                      | 1.71375e-30 | 1.00000 | 1.71375e-30 | 1.00000 |
| rad42                         | 3.16154e-31 | 1.00000 | 3.16154e-31 | 1.00000 |
| rad65                         | 3.55614e-32 | 1.00000 | 3.55614e-32 | 1.00000 |
| rad61                         | 1.79570e-34 | 1.00000 | 1.79570e-34 | 1.00000 |
| rad53                         | 7.21030e-35 | 1.00000 | 7.21030e-35 | 1.00000 |
| rad68syn                      | 3.56309e-37 | 1.00000 | 3.56309e-37 | 1.00000 |
| rad68anti                     | 2.86547e-37 | 1.00000 | 2.86547e-37 | 1.00000 |
| rad64                         | 8.52541e-39 | 1.00000 | 8.52541e-39 | 1.00000 |
| rad56                         | 6.22174e-40 | 1.00000 | 6.22174e-40 | 1.00000 |
| rad40syn                      | 1.84537e-41 | 1.00000 | 1.84537e-41 | 1.00000 |
| rad40anti                     | 1.42625e-41 | 1.00000 | 1.42625e-41 | 1.00000 |
| PAH8+H                        | 1.52003e-43 | 1.00000 | 1.52003e-43 | 1.00000 |
| rad73                         | 7.74073e-44 | 1.00000 | 7.74073e-44 | 1.00000 |
| rad71                         | 4.28439e-48 | 1.00000 | 4.28439e-48 | 1.00000 |

1000000.00 Pa, 110.000000 K

=====

| Rate constant             | True (fraction)        | Effective (fraction)   |
|---------------------------|------------------------|------------------------|
| Total                     | 1.95524e-15 (1.00 )    | 1.95524e-15 (1.00 )    |
| Formation of rad19        | 1.95524e-15 (1.000 )   | 1.95524e-15 (1.000 )   |
| H-abstraction to cyc2enyl | 4.50936e-23 (2.31e-08) | 4.50936e-23 (2.31e-08) |
| H-abstraction to cyclenyl | 7.87782e-30 (4.03e-15) | 7.87782e-30 (4.03e-15) |

| species                       | PYtrue      | Cumul    | PYeffective | Cumul    |
|-------------------------------|-------------|----------|-------------|----------|
| rad9                          | 0.774605    | 0.774605 | 0.774605    | 0.774605 |
| rad19anti                     | 0.224758    | 0.999363 | 0.224758    | 0.999363 |
| rad15                         | 0.000626494 | 0.999989 | 0.000626494 | 0.999989 |
| Indene+H                      | 9.40231e-06 | 0.999999 | 9.40231e-06 | 0.999999 |
| rad12                         | 1.20657e-06 | 1.00000  | 1.20657e-06 | 1.00000  |
| Benzene+cycloprop-2-enylidene | 2.30629e-08 | 1.00000  | 2.30629e-08 | 1.00000  |



|                               |             |         |             |         |
|-------------------------------|-------------|---------|-------------|---------|
| PhCHCCH2+H                    | 6.58914e-09 | 1.00000 | 6.58914e-09 | 1.00000 |
| rad11                         | 3.27915e-10 | 1.00000 | 3.27915e-10 | 1.00000 |
| rad2                          | 2.48450e-10 | 1.00000 | 2.48450e-10 | 1.00000 |
| rad7                          | 1.10020e-10 | 1.00000 | 1.10020e-10 | 1.00000 |
| rad18                         | 7.12523e-11 | 1.00000 | 7.12523e-11 | 1.00000 |
| rad26                         | 3.44439e-11 | 1.00000 | 3.44439e-11 | 1.00000 |
| rad1                          | 2.38932e-11 | 1.00000 | 2.38932e-11 | 1.00000 |
| rad21                         | 8.77822e-12 | 1.00000 | 8.77822e-12 | 1.00000 |
| rad6                          | 7.45954e-12 | 1.00000 | 7.45954e-12 | 1.00000 |
| rad20                         | 6.45326e-12 | 1.00000 | 6.45326e-12 | 1.00000 |
| rad8                          | 4.67098e-12 | 1.00000 | 4.67098e-12 | 1.00000 |
| rad22                         | 4.04782e-12 | 1.00000 | 4.04782e-12 | 1.00000 |
| rad67                         | 9.63448e-13 | 1.00000 | 9.63448e-13 | 1.00000 |
| rad45                         | 9.27588e-13 | 1.00000 | 9.27588e-13 | 1.00000 |
| rad35                         | 4.39854e-13 | 1.00000 | 4.39854e-13 | 1.00000 |
| PhcycC3H3_A+H                 | 4.11699e-13 | 1.00000 | 4.11699e-13 | 1.00000 |
| C2H2+PhCH2                    | 2.20508e-13 | 1.00000 | 2.20508e-13 | 1.00000 |
| rad5                          | 2.19669e-13 | 1.00000 | 2.19669e-13 | 1.00000 |
| rad10                         | 1.03677e-13 | 1.00000 | 1.03677e-13 | 1.00000 |
| rad36                         | 7.09008e-14 | 1.00000 | 7.09008e-14 | 1.00000 |
| rad3                          | 2.73119e-14 | 1.00000 | 2.73119e-14 | 1.00000 |
| rad4                          | 1.59823e-14 | 1.00000 | 1.59823e-14 | 1.00000 |
| rad23                         | 9.37660e-15 | 1.00000 | 9.37660e-15 | 1.00000 |
| PhCCCH3+H                     | 7.34950e-15 | 1.00000 | 7.34950e-15 | 1.00000 |
| Phenyl+cycC3H4                | 5.14020e-15 | 1.00000 | 0.00000     | 1.00000 |
| Ph+MeAc                       | 4.54145e-15 | 1.00000 | 4.54145e-15 | 1.00000 |
| Benzene+cycloprop-1-enylidene | 4.02908e-15 | 1.00000 | 4.02908e-15 | 1.00000 |
| rad24                         | 3.04487e-15 | 1.00000 | 3.04487e-15 | 1.00000 |
| rad25                         | 2.61260e-15 | 1.00000 | 2.61260e-15 | 1.00000 |
| Ph+Allene                     | 1.93267e-15 | 1.00000 | 1.93267e-15 | 1.00000 |
| rad27                         | 1.16217e-15 | 1.00000 | 1.16217e-15 | 1.00000 |
| rad30                         | 6.57203e-16 | 1.00000 | 6.57203e-16 | 1.00000 |
| PhCCH+CH3                     | 4.59345e-16 | 1.00000 | 4.59345e-16 | 1.00000 |
| PhCH2CCH+H                    | 3.03762e-16 | 1.00000 | 3.03762e-16 | 1.00000 |
| rad13                         | 2.65672e-16 | 1.00000 | 2.65672e-16 | 1.00000 |
| PhcycC3H3_B+H                 | 5.40562e-17 | 1.00000 | 5.40562e-17 | 1.00000 |
| rad37                         | 2.82034e-18 | 1.00000 | 2.82034e-18 | 1.00000 |
| rad33                         | 2.31380e-18 | 1.00000 | 2.31380e-18 | 1.00000 |
| rad60syn                      | 1.89114e-18 | 1.00000 | 1.89114e-18 | 1.00000 |
| rad28                         | 1.11860e-18 | 1.00000 | 1.11860e-18 | 1.00000 |
| rad60anti                     | 8.97506e-19 | 1.00000 | 8.97506e-19 | 1.00000 |
| rad14                         | 7.39015e-19 | 1.00000 | 7.39015e-19 | 1.00000 |
| PAH3+H                        | 5.56083e-19 | 1.00000 | 5.56083e-19 | 1.00000 |
| rad59                         | 1.18981e-19 | 1.00000 | 1.18981e-19 | 1.00000 |
| PAH7+H                        | 9.35426e-20 | 1.00000 | 9.35426e-20 | 1.00000 |
| rad31                         | 1.46043e-20 | 1.00000 | 1.46043e-20 | 1.00000 |
| rad38                         | 1.36899e-20 | 1.00000 | 1.36899e-20 | 1.00000 |
| PAH10+CH3                     | 2.42374e-21 | 1.00000 | 2.42374e-21 | 1.00000 |
| rad46                         | 4.13812e-22 | 1.00000 | 4.13812e-22 | 1.00000 |
| PAH9+H                        | 4.38849e-23 | 1.00000 | 4.38849e-23 | 1.00000 |
| rad43                         | 3.79210e-23 | 1.00000 | 3.79210e-23 | 1.00000 |
| rad58                         | 4.69192e-24 | 1.00000 | 4.69192e-24 | 1.00000 |
| rad70                         | 2.40924e-24 | 1.00000 | 2.40924e-24 | 1.00000 |
| rad50                         | 1.74465e-24 | 1.00000 | 1.74465e-24 | 1.00000 |
| rad39                         | 3.22068e-25 | 1.00000 | 3.22068e-25 | 1.00000 |
| PAH1+H                        | 1.29777e-25 | 1.00000 | 1.29777e-25 | 1.00000 |
| rad34                         | 2.55507e-26 | 1.00000 | 2.55507e-26 | 1.00000 |
| rad54                         | 2.06468e-26 | 1.00000 | 2.06468e-26 | 1.00000 |
| rad62                         | 9.50555e-27 | 1.00000 | 9.50555e-27 | 1.00000 |
| rad52                         | 9.18292e-27 | 1.00000 | 9.18292e-27 | 1.00000 |
| rad51                         | 2.06765e-27 | 1.00000 | 2.06765e-27 | 1.00000 |
| rad41                         | 7.70333e-28 | 1.00000 | 7.70333e-28 | 1.00000 |
| rad55                         | 1.32244e-28 | 1.00000 | 1.32244e-28 | 1.00000 |
| rad47                         | 5.24762e-29 | 1.00000 | 5.24762e-29 | 1.00000 |
| rad19syn                      | 2.34440e-30 | 1.00000 | 2.34440e-30 | 1.00000 |
| rad42                         | 8.54231e-31 | 1.00000 | 8.54231e-31 | 1.00000 |
| rad65                         | 7.89992e-32 | 1.00000 | 7.89992e-32 | 1.00000 |
| rad61                         | 1.20187e-33 | 1.00000 | 1.20187e-33 | 1.00000 |
| rad53                         | 2.75862e-34 | 1.00000 | 2.75862e-34 | 1.00000 |
| rad68syn                      | 3.35530e-36 | 1.00000 | 3.35530e-36 | 1.00000 |
| rad68anti                     | 2.68902e-36 | 1.00000 | 2.68902e-36 | 1.00000 |
| rad64                         | 4.01979e-38 | 1.00000 | 4.01979e-38 | 1.00000 |
| rad56                         | 6.10720e-39 | 1.00000 | 6.10720e-39 | 1.00000 |
| rad40syn                      | 2.98790e-40 | 1.00000 | 2.98790e-40 | 1.00000 |
| rad40anti                     | 2.30869e-40 | 1.00000 | 2.30869e-40 | 1.00000 |
| PAH8+H                        | 3.34888e-42 | 1.00000 | 3.34888e-42 | 1.00000 |
| rad73                         | 1.16333e-42 | 1.00000 | 1.16333e-42 | 1.00000 |
| rad71                         | 1.09121e-46 | 1.00000 | 1.09121e-46 | 1.00000 |

1000000.00 Pa, 120.000000 K

=====

| Rate constant             | True (fraction)        | Effective (fraction)   |
|---------------------------|------------------------|------------------------|
| Total                     | 2.79817e-15 (1.00 )    | 2.79817e-15 (1.00 )    |
| Formation of rad19        | 2.79817e-15 (1.000 )   | 2.79817e-15 (1.000 )   |
| H-abstraction to cyc2enyl | 2.96039e-22 (1.06e-07) | 2.96039e-22 (1.06e-07) |
| H-abstraction to cyclenyl | 1.95323e-28 (6.98e-14) | 1.95323e-28 (6.98e-14) |

| species                       | PYtrue      | Cumul    | PYeffective | Cumul    |
|-------------------------------|-------------|----------|-------------|----------|
| rad9                          | 0.802653    | 0.802653 | 0.802653    | 0.802653 |
| rad19anti                     | 0.196616    | 0.999269 | 0.196616    | 0.999269 |
| rad15                         | 0.000717793 | 0.999987 | 0.000717793 | 0.999987 |
| Indene+H                      | 1.20804e-05 | 0.999999 | 1.20804e-05 | 0.999999 |
| rad12                         | 1.13536e-06 | 1.000000 | 1.13536e-06 | 1.000000 |
| Benzene+cycloprop-2-enylidene | 1.05797e-07 | 1.000000 | 1.05797e-07 | 1.000000 |
| PhCHCCH2+H                    | 8.07724e-09 | 1.000000 | 8.07724e-09 | 1.000000 |
| rad11                         | 4.02860e-10 | 1.000000 | 4.02860e-10 | 1.000000 |
| rad2                          | 3.06528e-10 | 1.000000 | 3.06528e-10 | 1.000000 |
| rad7                          | 1.17428e-10 | 1.000000 | 1.17428e-10 | 1.000000 |
| rad18                         | 9.35308e-11 | 1.000000 | 9.35308e-11 | 1.000000 |
| rad26                         | 4.28327e-11 | 1.000000 | 4.28327e-11 | 1.000000 |
| rad1                          | 2.91470e-11 | 1.000000 | 2.91470e-11 | 1.000000 |
| rad21                         | 1.04544e-11 | 1.000000 | 1.04544e-11 | 1.000000 |
| rad6                          | 9.59051e-12 | 1.000000 | 9.59051e-12 | 1.000000 |
| rad20                         | 8.30238e-12 | 1.000000 | 8.30238e-12 | 1.000000 |
| rad22                         | 5.47949e-12 | 1.000000 | 5.47949e-12 | 1.000000 |
| rad8                          | 1.48819e-12 | 1.000000 | 1.48819e-12 | 1.000000 |
| rad67                         | 1.32420e-12 | 1.000000 | 1.32420e-12 | 1.000000 |
| rad45                         | 1.25054e-12 | 1.000000 | 1.25054e-12 | 1.000000 |
| rad35                         | 6.02936e-13 | 1.000000 | 6.02936e-13 | 1.000000 |
| PhcycC3H3_A+H                 | 5.73050e-13 | 1.000000 | 5.73050e-13 | 1.000000 |
| C2H2+PhCH2                    | 3.29944e-13 | 1.000000 | 3.29944e-13 | 1.000000 |
| rad5                          | 2.44944e-13 | 1.000000 | 2.44944e-13 | 1.000000 |
| rad10                         | 1.44146e-13 | 1.000000 | 1.44146e-13 | 1.000000 |
| rad36                         | 9.45599e-14 | 1.000000 | 9.45599e-14 | 1.000000 |
| Benzene+cycloprop-1-enylidene | 6.98038e-14 | 1.000000 | 6.98038e-14 | 1.000000 |
| rad3                          | 3.81730e-14 | 1.000000 | 3.81730e-14 | 1.000000 |
| rad4                          | 2.22528e-14 | 1.000000 | 2.22528e-14 | 1.000000 |
| rad23                         | 1.42256e-14 | 1.000000 | 1.42256e-14 | 1.000000 |
| PhCCCH3+H                     | 1.04854e-14 | 1.000000 | 1.04854e-14 | 1.000000 |
| Phenyl+cycC3H4                | 7.80208e-15 | 1.000000 | 0.000000    | 1.000000 |
| Ph+MeAc                       | 6.55472e-15 | 1.000000 | 6.55472e-15 | 1.000000 |
| rad25                         | 3.61583e-15 | 1.000000 | 3.61583e-15 | 1.000000 |
| rad24                         | 3.33287e-15 | 1.000000 | 3.33287e-15 | 1.000000 |
| Ph+Allene                     | 2.78251e-15 | 1.000000 | 2.78251e-15 | 1.000000 |
| rad27                         | 1.61027e-15 | 1.000000 | 1.61027e-15 | 1.000000 |
| rad30                         | 9.95903e-16 | 1.000000 | 9.95903e-16 | 1.000000 |
| PhCCH+CH3                     | 6.00920e-16 | 1.000000 | 6.00920e-16 | 1.000000 |
| PhCH2CCH+H                    | 4.44809e-16 | 1.000000 | 4.44809e-16 | 1.000000 |
| rad13                         | 3.63846e-16 | 1.000000 | 3.63846e-16 | 1.000000 |
| PhcycC3H3_B+H                 | 1.44785e-16 | 1.000000 | 1.44785e-16 | 1.000000 |
| rad37                         | 4.16210e-18 | 1.000000 | 4.16210e-18 | 1.000000 |
| rad33                         | 2.98350e-18 | 1.000000 | 2.98350e-18 | 1.000000 |
| rad60syn                      | 2.94373e-18 | 1.000000 | 2.94373e-18 | 1.000000 |
| rad28                         | 1.65488e-18 | 1.000000 | 1.65488e-18 | 1.000000 |
| rad60anti                     | 1.40041e-18 | 1.000000 | 1.40041e-18 | 1.000000 |
| rad14                         | 1.18242e-18 | 1.000000 | 1.18242e-18 | 1.000000 |
| PAH3+H                        | 8.94490e-19 | 1.000000 | 8.94490e-19 | 1.000000 |
| rad59                         | 1.90515e-19 | 1.000000 | 1.90515e-19 | 1.000000 |
| PAH7+H                        | 1.50114e-19 | 1.000000 | 1.50114e-19 | 1.000000 |
| rad38                         | 2.15346e-20 | 1.000000 | 2.15346e-20 | 1.000000 |
| rad31                         | 1.74470e-20 | 1.000000 | 1.74470e-20 | 1.000000 |
| PAH10+CH3                     | 3.91201e-21 | 1.000000 | 3.91201e-21 | 1.000000 |
| rad46                         | 6.71457e-22 | 1.000000 | 6.71457e-22 | 1.000000 |
| PAH9+H                        | 7.89368e-23 | 1.000000 | 7.89368e-23 | 1.000000 |
| rad43                         | 6.75182e-23 | 1.000000 | 6.75182e-23 | 1.000000 |
| rad58                         | 8.55053e-24 | 1.000000 | 8.55053e-24 | 1.000000 |
| rad70                         | 4.47997e-24 | 1.000000 | 4.47997e-24 | 1.000000 |
| rad50                         | 2.99103e-24 | 1.000000 | 2.99103e-24 | 1.000000 |
| rad39                         | 5.68444e-25 | 1.000000 | 5.68444e-25 | 1.000000 |
| PAH1+H                        | 2.39229e-25 | 1.000000 | 2.39229e-25 | 1.000000 |
| rad34                         | 5.18128e-26 | 1.000000 | 5.18128e-26 | 1.000000 |
| rad54                         | 3.58708e-26 | 1.000000 | 3.58708e-26 | 1.000000 |
| rad62                         | 2.02513e-26 | 1.000000 | 2.02513e-26 | 1.000000 |
| rad52                         | 1.64411e-26 | 1.000000 | 1.64411e-26 | 1.000000 |
| rad51                         | 3.88729e-27 | 1.000000 | 3.88729e-27 | 1.000000 |
| rad41                         | 1.75840e-27 | 1.000000 | 1.75840e-27 | 1.000000 |
| rad55                         | 2.43944e-28 | 1.000000 | 2.43944e-28 | 1.000000 |
| rad47                         | 1.01989e-28 | 1.000000 | 1.01989e-28 | 1.000000 |

|           |             |         |             |         |
|-----------|-------------|---------|-------------|---------|
| rad19syn  | 3.57288e-30 | 1.00000 | 3.57288e-30 | 1.00000 |
| rad42     | 2.29369e-30 | 1.00000 | 2.29369e-30 | 1.00000 |
| rad65     | 1.72919e-31 | 1.00000 | 1.72919e-31 | 1.00000 |
| rad61     | 7.69916e-33 | 1.00000 | 7.69916e-33 | 1.00000 |
| rad53     | 1.01052e-33 | 1.00000 | 1.01052e-33 | 1.00000 |
| rad68syn  | 3.06875e-35 | 1.00000 | 3.06875e-35 | 1.00000 |
| rad68anti | 2.44918e-35 | 1.00000 | 2.44918e-35 | 1.00000 |
| rad64     | 1.84544e-37 | 1.00000 | 1.84544e-37 | 1.00000 |
| rad56     | 5.80685e-38 | 1.00000 | 5.80685e-38 | 1.00000 |
| rad40syn  | 4.88251e-39 | 1.00000 | 4.88251e-39 | 1.00000 |
| rad40anti | 3.76908e-39 | 1.00000 | 3.76908e-39 | 1.00000 |
| PAH8+H    | 7.69263e-41 | 1.00000 | 7.69263e-41 | 1.00000 |
| rad73     | 1.74555e-41 | 1.00000 | 1.74555e-41 | 1.00000 |
| rad71     | 2.89932e-45 | 1.00000 | 2.89932e-45 | 1.00000 |

1000000.00 Pa, 130.000000 K

| Rate constant             | True (fraction)        | Effective (fraction)   |
|---------------------------|------------------------|------------------------|
| Total                     | 3.81236e-15 (1.00 )    | 3.81236e-15 (1.00 )    |
| Formation of rad19        | 3.81236e-15 (1.000 )   | 3.81236e-15 (1.000 )   |
| H-abstraction to cyc2enyl | 1.44825e-21 (3.80e-07) | 1.44825e-21 (3.80e-07) |
| H-abstraction to cyclenyl | 2.94348e-27 (7.72e-13) | 2.94348e-27 (7.72e-13) |

| species                       | PYtrue      | Cumul    | PYeffective | Cumul    |
|-------------------------------|-------------|----------|-------------|----------|
| rad9                          | 0.826984    | 0.826984 | 0.826984    | 0.826984 |
| rad19anti                     | 0.172188    | 0.999172 | 0.172188    | 0.999172 |
| rad15                         | 0.000811511 | 0.999983 | 0.000811511 | 0.999983 |
| Indene+H                      | 1.52183e-05 | 0.999998 | 1.52183e-05 | 0.999998 |
| rad12                         | 1.07300e-06 | 0.999999 | 1.07300e-06 | 0.999999 |
| Benzene+cycloprop-2-enylidene | 3.79882e-07 | 1.000000 | 3.79882e-07 | 1.000000 |
| PhCHCCH2+H                    | 9.79397e-09 | 1.000000 | 9.79397e-09 | 1.000000 |
| rad11                         | 4.89596e-10 | 1.000000 | 4.89596e-10 | 1.000000 |
| rad2                          | 3.74123e-10 | 1.000000 | 3.74123e-10 | 1.000000 |
| rad7                          | 1.25729e-10 | 1.000000 | 1.25729e-10 | 1.000000 |
| rad18                         | 1.20508e-10 | 1.000000 | 1.20508e-10 | 1.000000 |
| rad26                         | 5.26144e-11 | 1.000000 | 5.26144e-11 | 1.000000 |
| rad1                          | 3.52361e-11 | 1.000000 | 3.52361e-11 | 1.000000 |
| rad21                         | 1.23653e-11 | 1.000000 | 1.23653e-11 | 1.000000 |
| rad6                          | 1.22607e-11 | 1.000000 | 1.22607e-11 | 1.000000 |
| rad20                         | 1.05135e-11 | 1.000000 | 1.05135e-11 | 1.000000 |
| rad22                         | 7.30597e-12 | 1.000000 | 7.30597e-12 | 1.000000 |
| rad67                         | 1.79083e-12 | 1.000000 | 1.79083e-12 | 1.000000 |
| rad45                         | 1.66069e-12 | 1.000000 | 1.66069e-12 | 1.000000 |
| rad35                         | 8.13093e-13 | 1.000000 | 8.13093e-13 | 1.000000 |
| PhcycC3H3_A+H                 | 7.98817e-13 | 1.000000 | 7.98817e-13 | 1.000000 |
| Benzene+cycloprop-1-enylidene | 7.72089e-13 | 1.000000 | 7.72089e-13 | 1.000000 |
| rad8                          | 5.12553e-13 | 1.000000 | 5.12553e-13 | 1.000000 |
| C2H2+PhCH2                    | 4.83707e-13 | 1.000000 | 4.83707e-13 | 1.000000 |
| rad5                          | 2.74410e-13 | 1.000000 | 2.74410e-13 | 1.000000 |
| rad10                         | 1.97333e-13 | 1.000000 | 1.97333e-13 | 1.000000 |
| rad36                         | 1.24415e-13 | 1.000000 | 1.24415e-13 | 1.000000 |
| rad3                          | 5.25389e-14 | 1.000000 | 5.25389e-14 | 1.000000 |
| rad4                          | 3.05266e-14 | 1.000000 | 3.05266e-14 | 1.000000 |
| rad23                         | 2.11261e-14 | 1.000000 | 2.11261e-14 | 1.000000 |
| PhCCH3+H                      | 1.47632e-14 | 1.000000 | 1.47632e-14 | 1.000000 |
| Phenyl+cycC3H4                | 1.17201e-14 | 1.000000 | 0.000000    | 1.000000 |
| Ph+MeAc                       | 9.34797e-15 | 1.000000 | 9.34797e-15 | 1.000000 |
| rad25                         | 4.92617e-15 | 1.000000 | 4.92617e-15 | 1.000000 |
| Ph+Allene                     | 3.95540e-15 | 1.000000 | 3.95540e-15 | 1.000000 |
| rad24                         | 3.64974e-15 | 1.000000 | 3.64974e-15 | 1.000000 |
| rad27                         | 2.19658e-15 | 1.000000 | 2.19658e-15 | 1.000000 |
| rad30                         | 1.47638e-15 | 1.000000 | 1.47638e-15 | 1.000000 |
| PhCCH+CH3                     | 7.90508e-16 | 1.000000 | 7.90508e-16 | 1.000000 |
| PhCH2CCH+H                    | 6.44010e-16 | 1.000000 | 6.44010e-16 | 1.000000 |
| rad13                         | 4.93105e-16 | 1.000000 | 4.93105e-16 | 1.000000 |
| PhcycC3H3_B+H                 | 3.60049e-16 | 1.000000 | 3.60049e-16 | 1.000000 |
| rad37                         | 6.05498e-18 | 1.000000 | 6.05498e-18 | 1.000000 |
| rad60syn                      | 4.49201e-18 | 1.000000 | 4.49201e-18 | 1.000000 |
| rad33                         | 3.81735e-18 | 1.000000 | 3.81735e-18 | 1.000000 |
| rad28                         | 2.41549e-18 | 1.000000 | 2.41549e-18 | 1.000000 |
| rad60anti                     | 2.14251e-18 | 1.000000 | 2.14251e-18 | 1.000000 |
| rad14                         | 1.85809e-18 | 1.000000 | 1.85809e-18 | 1.000000 |
| PAH3+H                        | 1.41438e-18 | 1.000000 | 1.41438e-18 | 1.000000 |
| rad59                         | 2.99743e-19 | 1.000000 | 2.99743e-19 | 1.000000 |
| PAH7+H                        | 2.37790e-19 | 1.000000 | 2.37790e-19 | 1.000000 |
| rad38                         | 3.33684e-20 | 1.000000 | 3.33684e-20 | 1.000000 |
| rad31                         | 2.08119e-20 | 1.000000 | 2.08119e-20 | 1.000000 |
| PAH10+CH3                     | 6.26766e-21 | 1.000000 | 6.26766e-21 | 1.000000 |

|           |             |          |             |          |
|-----------|-------------|----------|-------------|----------|
| rad46     | 1.07040e-21 | 1.000000 | 1.07040e-21 | 1.000000 |
| PAH9+H    | 1.38934e-22 | 1.000000 | 1.38934e-22 | 1.000000 |
| rad43     | 1.19179e-22 | 1.000000 | 1.19179e-22 | 1.000000 |
| rad58     | 1.54592e-23 | 1.000000 | 1.54592e-23 | 1.000000 |
| rad70     | 8.28673e-24 | 1.000000 | 8.28673e-24 | 1.000000 |
| rad50     | 5.05973e-24 | 1.000000 | 5.05973e-24 | 1.000000 |
| rad39     | 9.91811e-25 | 1.000000 | 9.91811e-25 | 1.000000 |
| PAH1+H    | 4.40972e-25 | 1.000000 | 4.40972e-25 | 1.000000 |
| rad34     | 1.04978e-25 | 1.000000 | 1.04978e-25 | 1.000000 |
| rad54     | 6.24808e-26 | 1.000000 | 6.24808e-26 | 1.000000 |
| rad62     | 4.29095e-26 | 1.000000 | 4.29095e-26 | 1.000000 |
| rad52     | 2.91337e-26 | 1.000000 | 2.91337e-26 | 1.000000 |
| rad51     | 7.26069e-27 | 1.000000 | 7.26069e-27 | 1.000000 |
| rad41     | 4.01377e-27 | 1.000000 | 4.01377e-27 | 1.000000 |
| rad55     | 4.53474e-28 | 1.000000 | 4.53474e-28 | 1.000000 |
| rad47     | 1.94492e-28 | 1.000000 | 1.94492e-28 | 1.000000 |
| rad42     | 6.17900e-30 | 1.000000 | 6.17900e-30 | 1.000000 |
| rad19syn  | 5.97957e-30 | 1.000000 | 5.97957e-30 | 1.000000 |
| rad65     | 3.77303e-31 | 1.000000 | 3.77303e-31 | 1.000000 |
| rad61     | 4.56303e-32 | 1.000000 | 4.56303e-32 | 1.000000 |
| rad53     | 3.56711e-33 | 1.000000 | 3.56711e-33 | 1.000000 |
| rad68syn  | 2.58941e-34 | 1.000000 | 2.58941e-34 | 1.000000 |
| rad68anti | 2.05647e-34 | 1.000000 | 2.05647e-34 | 1.000000 |
| rad64     | 8.21890e-37 | 1.000000 | 8.21890e-37 | 1.000000 |
| rad56     | 5.02135e-37 | 1.000000 | 5.02135e-37 | 1.000000 |
| rad40syn  | 7.48718e-38 | 1.000000 | 7.48718e-38 | 1.000000 |
| rad40anti | 5.77021e-38 | 1.000000 | 5.77021e-38 | 1.000000 |
| PAH8+H    | 1.69713e-39 | 1.000000 | 1.69713e-39 | 1.000000 |
| rad73     | 2.45342e-40 | 1.000000 | 2.45342e-40 | 1.000000 |
| rad71     | 7.41275e-44 | 1.000000 | 7.41275e-44 | 1.000000 |

1000000.00 Pa, 140.000000 K

| Rate constant             | True (fraction)        | Effective (fraction)   |
|---------------------------|------------------------|------------------------|
| Total                     | 4.99515e-15 (1.00 )    | 4.99515e-15 (1.00 )    |
| Formation of rad19        | 4.99514e-15 (1.000 )   | 4.99514e-15 (1.000 )   |
| H-abstraction to cyc2enyl | 5.62488e-21 (1.13e-06) | 5.62488e-21 (1.13e-06) |
| H-abstraction to cyc1enyl | 3.00047e-26 (6.01e-12) | 3.00047e-26 (6.01e-12) |

| species                       | PYtrue      | Cumul    | PYeffective | Cumul    |
|-------------------------------|-------------|----------|-------------|----------|
| rad9                          | 0.848135    | 0.848135 | 0.848135    | 0.848135 |
| rad19anti                     | 0.150936    | 0.999071 | 0.150936    | 0.999071 |
| rad15                         | 0.000907504 | 0.999978 | 0.000907504 | 0.999978 |
| Indene+H                      | 1.88688e-05 | 0.999997 | 1.88688e-05 | 0.999997 |
| Benzene+cycloprop-2-enylidene | 1.12607e-06 | 0.999998 | 1.12607e-06 | 0.999998 |
| rad12                         | 1.01790e-06 | 0.999999 | 1.01790e-06 | 0.999999 |
| PhCHCCH2+H                    | 1.17788e-08 | 0.999999 | 1.17788e-08 | 0.999999 |
| rad11                         | 5.90198e-10 | 0.999999 | 5.90198e-10 | 0.999999 |
| rad2                          | 4.52976e-10 | 0.999999 | 4.52976e-10 | 0.999999 |
| rad18                         | 1.52992e-10 | 0.999999 | 1.52992e-10 | 0.999999 |
| rad7                          | 1.35072e-10 | 0.999999 | 1.35072e-10 | 0.999999 |
| rad26                         | 6.40385e-11 | 0.999999 | 6.40385e-11 | 0.999999 |
| rad1                          | 4.23212e-11 | 0.999999 | 4.23212e-11 | 0.999999 |
| rad6                          | 1.56152e-11 | 0.999999 | 1.56152e-11 | 0.999999 |
| rad21                         | 1.45609e-11 | 0.999999 | 1.45609e-11 | 0.999999 |
| rad20                         | 1.31534e-11 | 0.999999 | 1.31534e-11 | 0.999999 |
| rad22                         | 9.63322e-12 | 0.999999 | 9.63322e-12 | 0.999999 |
| Benzene+cycloprop-1-enylidene | 6.00677e-12 | 0.999999 | 6.00677e-12 | 0.999999 |
| rad67                         | 2.39304e-12 | 0.999999 | 2.39304e-12 | 0.999999 |
| rad45                         | 2.18135e-12 | 0.999999 | 2.18135e-12 | 0.999999 |
| PhcycC3H3_A+H                 | 1.11661e-12 | 0.999999 | 1.11661e-12 | 0.999999 |
| rad35                         | 1.08325e-12 | 0.999999 | 1.08325e-12 | 0.999999 |
| C2H2+PhCH2                    | 6.98549e-13 | 0.999999 | 6.98549e-13 | 0.999999 |
| rad5                          | 3.09213e-13 | 0.999999 | 3.09213e-13 | 0.999999 |
| rad10                         | 2.67154e-13 | 0.999999 | 2.67154e-13 | 0.999999 |
| rad8                          | 1.89228e-13 | 0.999999 | 1.89228e-13 | 0.999999 |
| rad36                         | 1.62123e-13 | 0.999999 | 1.62123e-13 | 0.999999 |
| rad3                          | 7.15203e-14 | 0.999999 | 7.15203e-14 | 0.999999 |
| rad4                          | 4.14374e-14 | 0.999999 | 4.14374e-14 | 0.999999 |
| rad23                         | 3.08886e-14 | 0.999999 | 3.08886e-14 | 0.999999 |
| PhCCCH3+H                     | 2.06070e-14 | 0.999999 | 2.06070e-14 | 0.999999 |
| Phenyl+cycC3H4                | 1.74858e-14 | 0.999999 | 0.00000     | 0.999999 |
| Ph+MeAc                       | 1.32335e-14 | 0.999999 | 1.32335e-14 | 0.999999 |
| rad25                         | 6.63431e-15 | 0.999999 | 6.63431e-15 | 0.999999 |
| Ph+Allene                     | 5.57727e-15 | 0.999999 | 5.57727e-15 | 0.999999 |
| rad24                         | 4.00385e-15 | 0.999999 | 4.00385e-15 | 0.999999 |
| rad27                         | 2.96237e-15 | 0.999999 | 2.96237e-15 | 0.999999 |
| rad30                         | 2.15319e-15 | 0.999999 | 2.15319e-15 | 0.999999 |

|               |             |          |             |          |
|---------------|-------------|----------|-------------|----------|
| PhCCH+CH3     | 1.04929e-15 | 0.999999 | 1.04929e-15 | 0.999999 |
| PhCH2CCH+H    | 9.26296e-16 | 0.999999 | 9.26296e-16 | 0.999999 |
| PhcycC3H3_B+H | 8.40358e-16 | 0.999999 | 8.40358e-16 | 0.999999 |
| rad13         | 6.63276e-16 | 0.999999 | 6.63276e-16 | 0.999999 |
| rad37         | 8.72882e-18 | 0.999999 | 8.72882e-18 | 0.999999 |
| rad60syn      | 6.75908e-18 | 0.999999 | 6.75908e-18 | 0.999999 |
| rad33         | 4.85871e-18 | 0.999999 | 4.85871e-18 | 0.999999 |
| rad28         | 3.49665e-18 | 0.999999 | 3.49665e-18 | 0.999999 |
| rad60anti     | 3.23286e-18 | 0.999999 | 3.23286e-18 | 0.999999 |
| rad14         | 2.88534e-18 | 0.999999 | 2.88534e-18 | 0.999999 |
| PAH3+H        | 2.21190e-18 | 0.999999 | 2.21190e-18 | 0.999999 |
| rad59         | 4.66190e-19 | 0.999999 | 4.66190e-19 | 0.999999 |
| PAH7+H        | 3.73984e-19 | 0.999999 | 3.73984e-19 | 0.999999 |
| rad38         | 5.12349e-20 | 0.999999 | 5.12349e-20 | 0.999999 |
| rad31         | 2.48300e-20 | 0.999999 | 2.48300e-20 | 0.999999 |
| PAH10+CH3     | 1.00260e-20 | 0.999999 | 1.00260e-20 | 0.999999 |
| rad46         | 1.68762e-21 | 0.999999 | 1.68762e-21 | 0.999999 |
| PAH9+H        | 2.41225e-22 | 0.999999 | 2.41225e-22 | 0.999999 |
| rad43         | 2.09959e-22 | 0.999999 | 2.09959e-22 | 0.999999 |
| rad58         | 2.79056e-23 | 0.999999 | 2.79056e-23 | 0.999999 |
| rad70         | 1.53489e-23 | 0.999999 | 1.53489e-23 | 0.999999 |
| rad50         | 8.50640e-24 | 0.999999 | 8.50640e-24 | 0.999999 |
| rad39         | 1.72395e-24 | 0.999999 | 1.72395e-24 | 0.999999 |
| PAH1+H        | 8.17278e-25 | 0.999999 | 8.17278e-25 | 0.999999 |
| rad34         | 2.13795e-25 | 0.999999 | 2.13795e-25 | 0.999999 |
| rad54         | 1.09724e-25 | 0.999999 | 1.09724e-25 | 0.999999 |
| rad62         | 9.12180e-26 | 0.999999 | 9.12180e-26 | 0.999999 |
| rad52         | 5.14803e-26 | 0.999999 | 5.14803e-26 | 0.999999 |
| rad51         | 1.35769e-26 | 0.999999 | 1.35769e-26 | 0.999999 |
| rad41         | 9.20731e-27 | 0.999999 | 9.20731e-27 | 0.999999 |
| rad55         | 8.54102e-28 | 0.999999 | 8.54102e-28 | 0.999999 |
| rad47         | 3.65413e-28 | 0.999999 | 3.65413e-28 | 0.999999 |
| rad42         | 1.68061e-29 | 0.999999 | 1.68061e-29 | 0.999999 |
| rad19syn      | 1.08912e-29 | 0.999999 | 1.08912e-29 | 0.999999 |
| rad65         | 8.28139e-31 | 0.999999 | 8.28139e-31 | 0.999999 |
| rad61         | 2.46591e-31 | 0.999999 | 2.46591e-31 | 0.999999 |
| rad53         | 1.22171e-32 | 0.999999 | 1.22171e-32 | 0.999999 |
| rad68syn      | 1.95837e-33 | 0.999999 | 1.95837e-33 | 0.999999 |
| rad68anti     | 1.54637e-33 | 0.999999 | 1.54637e-33 | 0.999999 |
| rad56         | 3.84558e-36 | 0.999999 | 3.84558e-36 | 0.999999 |
| rad64         | 3.55063e-36 | 0.999999 | 3.55063e-36 | 0.999999 |
| rad40syn      | 1.01782e-36 | 0.999999 | 1.01782e-36 | 0.999999 |
| rad40anti     | 7.82576e-37 | 0.999999 | 7.82576e-37 | 0.999999 |
| PAH8+H        | 3.34004e-38 | 0.999999 | 3.34004e-38 | 0.999999 |
| rad73         | 3.08143e-39 | 0.999999 | 3.08143e-39 | 0.999999 |
| rad71         | 1.69355e-42 | 0.999999 | 1.69355e-42 | 0.999999 |

1000000.00 Pa, 150.000000 K

=====

| Rate constant             | True (fraction)        | Effective (fraction)   |
|---------------------------|------------------------|------------------------|
| Total                     | 6.34137e-15 (1.00 )    | 6.34137e-15 (1.00 )    |
| Formation of rad19        | 6.34135e-15 (1.000 )   | 6.34135e-15 (1.000 )   |
| H-abstraction to cyc2enyl | 1.81685e-20 (2.87e-06) | 1.81685e-20 (2.87e-06) |
| H-abstraction to cyc1enyl | 2.23765e-25 (3.53e-11) | 2.23765e-25 (3.53e-11) |

| species                       | PYtrue      | Cumul    | PYeffective | Cumul    |
|-------------------------------|-------------|----------|-------------|----------|
| rad9                          | 0.866550    | 0.866550 | 0.866550    | 0.866550 |
| rad19anti                     | 0.132418    | 0.998967 | 0.132418    | 0.998967 |
| rad15                         | 0.00100569  | 0.999973 | 0.00100569  | 0.999973 |
| Indene+H                      | 2.30943e-05 | 0.999996 | 2.30943e-05 | 0.999996 |
| Benzene+cycloprop-2-enylidene | 2.86508e-06 | 0.999999 | 2.86508e-06 | 0.999999 |
| rad12                         | 9.68848e-07 | 1.000000 | 9.68848e-07 | 1.000000 |
| PhCHCCH2+H                    | 1.40810e-08 | 1.000000 | 1.40810e-08 | 1.000000 |
| rad11                         | 7.07262e-10 | 1.000000 | 7.07262e-10 | 1.000000 |
| rad2                          | 5.45276e-10 | 1.000000 | 5.45276e-10 | 1.000000 |
| rad18                         | 1.91963e-10 | 1.000000 | 1.91963e-10 | 1.000000 |
| rad7                          | 1.45637e-10 | 1.000000 | 1.45637e-10 | 1.000000 |
| rad26                         | 7.74188e-11 | 1.000000 | 7.74188e-11 | 1.000000 |
| rad1                          | 5.06048e-11 | 1.000000 | 5.06048e-11 | 1.000000 |
| Benzene+cycloprop-1-enylidene | 3.52865e-11 | 1.000000 | 3.52865e-11 | 1.000000 |
| rad6                          | 1.98450e-11 | 1.000000 | 1.98450e-11 | 1.000000 |
| rad21                         | 1.71032e-11 | 1.000000 | 1.71032e-11 | 1.000000 |
| rad20                         | 1.63056e-11 | 1.000000 | 1.63056e-11 | 1.000000 |
| rad22                         | 1.26010e-11 | 1.000000 | 1.26010e-11 | 1.000000 |
| rad67                         | 3.17028e-12 | 1.000000 | 3.17028e-12 | 1.000000 |
| rad45                         | 2.84336e-12 | 1.000000 | 2.84336e-12 | 1.000000 |
| PhcycC3H3_A+H                 | 1.56644e-12 | 1.000000 | 1.56644e-12 | 1.000000 |
| rad35                         | 1.43051e-12 | 1.000000 | 1.43051e-12 | 1.000000 |

|                |             |          |             |          |
|----------------|-------------|----------|-------------|----------|
| C2H2+PhCH2     | 9.98053e-13 | 1.000000 | 9.98053e-13 | 1.000000 |
| rad10          | 3.58931e-13 | 1.000000 | 3.58931e-13 | 1.000000 |
| rad5           | 3.50834e-13 | 1.000000 | 3.50834e-13 | 1.000000 |
| rad36          | 2.09882e-13 | 1.000000 | 2.09882e-13 | 1.000000 |
| rad3           | 9.66363e-14 | 1.000000 | 9.66363e-14 | 1.000000 |
| rad8           | 7.43634e-14 | 1.000000 | 7.43634e-14 | 1.000000 |
| rad4           | 5.58524e-14 | 1.000000 | 5.58524e-14 | 1.000000 |
| rad23          | 4.46688e-14 | 1.000000 | 4.46688e-14 | 1.000000 |
| PhCCCH3+H      | 2.86216e-14 | 1.000000 | 2.86216e-14 | 1.000000 |
| Phenyl+cycC3H4 | 2.59757e-14 | 1.000000 | 0.000000    | 1.000000 |
| Ph+MeAc        | 1.86667e-14 | 1.000000 | 1.86667e-14 | 1.000000 |
| rad25          | 8.86166e-15 | 1.000000 | 8.86166e-15 | 1.000000 |
| Ph+Allene      | 7.83008e-15 | 1.000000 | 7.83008e-15 | 1.000000 |
| rad24          | 4.40474e-15 | 1.000000 | 4.40474e-15 | 1.000000 |
| rad27          | 3.96297e-15 | 1.000000 | 3.96297e-15 | 1.000000 |
| rad30          | 3.10326e-15 | 1.000000 | 3.10326e-15 | 1.000000 |
| PhcycC3H3_B+H  | 1.85970e-15 | 1.000000 | 1.85970e-15 | 1.000000 |
| PhCCH+CH3      | 1.40963e-15 | 1.000000 | 1.40963e-15 | 1.000000 |
| PhCH2CCH+H     | 1.32874e-15 | 1.000000 | 1.32874e-15 | 1.000000 |
| rad13          | 8.87669e-16 | 1.000000 | 8.87669e-16 | 1.000000 |
| rad37          | 1.25220e-17 | 1.000000 | 1.25220e-17 | 1.000000 |
| rad60syn       | 1.00758e-17 | 1.000000 | 1.00758e-17 | 1.000000 |
| rad33          | 6.16456e-18 | 1.000000 | 6.16456e-18 | 1.000000 |
| rad28          | 5.04136e-18 | 1.000000 | 5.04136e-18 | 1.000000 |
| rad60anti      | 4.83385e-18 | 1.000000 | 4.83385e-18 | 1.000000 |
| rad14          | 4.44952e-18 | 1.000000 | 4.44952e-18 | 1.000000 |
| PAH3+H         | 3.43804e-18 | 1.000000 | 3.43804e-18 | 1.000000 |
| rad59          | 7.20273e-19 | 1.000000 | 7.20273e-19 | 1.000000 |
| PAH7+H         | 5.86749e-19 | 1.000000 | 5.86749e-19 | 1.000000 |
| rad38          | 7.83302e-20 | 1.000000 | 7.83302e-20 | 1.000000 |
| rad31          | 2.96728e-20 | 1.000000 | 2.96728e-20 | 1.000000 |
| PAH10+CH3      | 1.60879e-20 | 1.000000 | 1.60879e-20 | 1.000000 |
| rad46          | 2.64572e-21 | 1.000000 | 2.64572e-21 | 1.000000 |
| PAH9+H         | 4.15920e-22 | 1.000000 | 4.15920e-22 | 1.000000 |
| rad43          | 3.71125e-22 | 1.000000 | 3.71125e-22 | 1.000000 |
| rad58          | 5.05348e-23 | 1.000000 | 5.05348e-23 | 1.000000 |
| rad70          | 2.86103e-23 | 1.000000 | 2.86103e-23 | 1.000000 |
| rad50          | 1.42959e-23 | 1.000000 | 1.42959e-23 | 1.000000 |
| rad39          | 3.00418e-24 | 1.000000 | 3.00418e-24 | 1.000000 |
| PAH1+H         | 1.52893e-24 | 1.000000 | 1.52893e-24 | 1.000000 |
| rad34          | 4.39431e-25 | 1.000000 | 4.39431e-25 | 1.000000 |
| rad62          | 1.95854e-25 | 1.000000 | 1.95854e-25 | 1.000000 |
| rad54          | 1.95129e-25 | 1.000000 | 1.95129e-25 | 1.000000 |
| rad52          | 9.12609e-26 | 1.000000 | 9.12609e-26 | 1.000000 |
| rad51          | 2.55680e-26 | 1.000000 | 2.55680e-26 | 1.000000 |
| rad41          | 2.12870e-26 | 1.000000 | 2.12870e-26 | 1.000000 |
| rad55          | 1.63628e-27 | 1.000000 | 1.63628e-27 | 1.000000 |
| rad47          | 6.78040e-28 | 1.000000 | 6.78040e-28 | 1.000000 |
| rad42          | 4.63126e-29 | 1.000000 | 4.63126e-29 | 1.000000 |
| rad19syn       | 2.14579e-29 | 1.000000 | 2.14579e-29 | 1.000000 |
| rad65          | 1.84086e-30 | 1.000000 | 1.84086e-30 | 1.000000 |
| rad61          | 1.21455e-30 | 1.000000 | 1.21455e-30 | 1.000000 |
| rad53          | 4.08318e-32 | 1.000000 | 4.08318e-32 | 1.000000 |
| rad68syn       | 1.31728e-32 | 1.000000 | 1.31728e-32 | 1.000000 |
| rad68anti      | 1.03329e-32 | 1.000000 | 1.03329e-32 | 1.000000 |
| rad56          | 2.60696e-35 | 1.000000 | 2.60696e-35 | 1.000000 |
| rad64          | 1.49082e-35 | 1.000000 | 1.49082e-35 | 1.000000 |
| rad40syn       | 1.19148e-35 | 1.000000 | 1.19148e-35 | 1.000000 |
| rad40anti      | 9.13403e-36 | 1.000000 | 9.13403e-36 | 1.000000 |
| PAH8+H         | 5.59157e-37 | 1.000000 | 5.59157e-37 | 1.000000 |
| rad73          | 3.38114e-38 | 1.000000 | 3.38114e-38 | 1.000000 |
| rad71          | 3.29021e-41 | 1.000000 | 3.29021e-41 | 1.000000 |

1000000.00 Pa, 160.000000 K

| Rate constant             | True (fraction)        | Effective (fraction)   |
|---------------------------|------------------------|------------------------|
| Total                     | 7.84423e-15 (1.00 )    | 7.84423e-15 (1.00 )    |
| Formation of rad19        | 7.84418e-15 (1.000 )   | 7.84418e-15 (1.000 )   |
| H-abstraction to cyc2enyl | 5.05321e-20 (6.44e-06) | 5.05321e-20 (6.44e-06) |
| H-abstraction to cyc1enyl | 1.29479e-24 (1.65e-10) | 1.29479e-24 (1.65e-10) |

| species                       | PYtrue      | Cumul    | PYeffective | Cumul    |
|-------------------------------|-------------|----------|-------------|----------|
| rad9                          | 0.882596    | 0.882596 | 0.882596    | 0.882596 |
| rad19anti                     | 0.116262    | 0.998859 | 0.116262    | 0.998859 |
| rad15                         | 0.00110601  | 0.999965 | 0.00110601  | 0.999965 |
| Indene+H                      | 2.79689e-05 | 0.999993 | 2.79689e-05 | 0.999993 |
| Benzene+cycloprop-2-enylidene | 6.44194e-06 | 0.999999 | 6.44194e-06 | 0.999999 |
| rad12                         | 9.24901e-07 | 1.000000 | 9.24901e-07 | 1.000000 |

|                               |             |          |             |          |
|-------------------------------|-------------|----------|-------------|----------|
| PhCHCCH2+H                    | 1.67622e-08 | 1.000000 | 1.67622e-08 | 1.000000 |
| rad11                         | 8.44022e-10 | 1.000000 | 8.44022e-10 | 1.000000 |
| rad2                          | 6.53767e-10 | 1.000000 | 6.53767e-10 | 1.000000 |
| rad18                         | 2.38619e-10 | 1.000000 | 2.38619e-10 | 1.000000 |
| Benzene+cycloprop-1-enylidene | 1.65062e-10 | 1.000000 | 1.65062e-10 | 1.000000 |
| rad7                          | 1.57636e-10 | 1.000000 | 1.57636e-10 | 1.000000 |
| rad26                         | 9.31487e-11 | 1.000000 | 9.31487e-11 | 1.000000 |
| rad1                          | 6.03424e-11 | 1.000000 | 6.03424e-11 | 1.000000 |
| rad6                          | 2.52036e-11 | 1.000000 | 2.52036e-11 | 1.000000 |
| rad20                         | 2.00744e-11 | 1.000000 | 2.00744e-11 | 1.000000 |
| rad21                         | 2.00688e-11 | 1.000000 | 2.00688e-11 | 1.000000 |
| rad22                         | 1.63940e-11 | 1.000000 | 1.63940e-11 | 1.000000 |
| rad67                         | 4.17521e-12 | 1.000000 | 4.17521e-12 | 1.000000 |
| rad45                         | 3.68780e-12 | 1.000000 | 3.68780e-12 | 1.000000 |
| PhcycC3H3_A+H                 | 2.20633e-12 | 1.000000 | 2.20633e-12 | 1.000000 |
| rad35                         | 1.87756e-12 | 1.000000 | 1.87756e-12 | 1.000000 |
| C2H2+PhCH2                    | 1.41565e-12 | 1.000000 | 1.41565e-12 | 1.000000 |
| rad10                         | 4.79959e-13 | 1.000000 | 4.79959e-13 | 1.000000 |
| rad5                          | 4.01208e-13 | 1.000000 | 4.01208e-13 | 1.000000 |
| rad36                         | 2.70627e-13 | 1.000000 | 2.70627e-13 | 1.000000 |
| rad3                          | 1.29981e-13 | 1.000000 | 1.29981e-13 | 1.000000 |
| rad4                          | 7.49683e-14 | 1.000000 | 7.49683e-14 | 1.000000 |
| rad23                         | 6.41312e-14 | 1.000000 | 6.41312e-14 | 1.000000 |
| PhCCCH3+H                     | 3.96790e-14 | 1.000000 | 3.96790e-14 | 1.000000 |
| Phenyl+cycC3H4                | 3.84866e-14 | 1.000000 | 0.000000    | 1.000000 |
| rad8                          | 3.09246e-14 | 1.000000 | 3.09246e-14 | 1.000000 |
| Ph+MeAc                       | 2.63185e-14 | 1.000000 | 2.63185e-14 | 1.000000 |
| rad25                         | 1.17714e-14 | 1.000000 | 1.17714e-14 | 1.000000 |
| Ph+Allene                     | 1.09793e-14 | 1.000000 | 1.09793e-14 | 1.000000 |
| rad27                         | 5.27294e-15 | 1.000000 | 5.27294e-15 | 1.000000 |
| rad24                         | 4.86351e-15 | 1.000000 | 4.86351e-15 | 1.000000 |
| rad30                         | 4.43594e-15 | 1.000000 | 4.43594e-15 | 1.000000 |
| PhcycC3H3_B+H                 | 3.93600e-15 | 1.000000 | 3.93600e-15 | 1.000000 |
| PhCCH+CH3                     | 1.92175e-15 | 1.000000 | 1.92175e-15 | 1.000000 |
| PhCH2CCH+H                    | 1.90701e-15 | 1.000000 | 1.90701e-15 | 1.000000 |
| rad13                         | 1.18441e-15 | 1.000000 | 1.18441e-15 | 1.000000 |
| rad37                         | 1.79376e-17 | 1.000000 | 1.79376e-17 | 1.000000 |
| rad60syn                      | 1.49372e-17 | 1.000000 | 1.49372e-17 | 1.000000 |
| rad33                         | 7.81018e-18 | 1.000000 | 7.81018e-18 | 1.000000 |
| rad28                         | 7.26464e-18 | 1.000000 | 7.26464e-18 | 1.000000 |
| rad60anti                     | 7.18957e-18 | 1.000000 | 7.18957e-18 | 1.000000 |
| rad14                         | 6.84179e-18 | 1.000000 | 6.84179e-18 | 1.000000 |
| PAH3+H                        | 5.33254e-18 | 1.000000 | 5.33254e-18 | 1.000000 |
| rad59                         | 1.10985e-18 | 1.000000 | 1.10985e-18 | 1.000000 |
| PAH7+H                        | 9.21852e-19 | 1.000000 | 9.21852e-19 | 1.000000 |
| rad38                         | 1.19715e-19 | 1.000000 | 1.19715e-19 | 1.000000 |
| rad31                         | 3.55666e-20 | 1.000000 | 3.55666e-20 | 1.000000 |
| PAH10+CH3                     | 2.59897e-20 | 1.000000 | 2.59897e-20 | 1.000000 |
| rad46                         | 4.14266e-21 | 1.000000 | 4.14266e-21 | 1.000000 |
| PAH9+H                        | 7.16056e-22 | 1.000000 | 7.16056e-22 | 1.000000 |
| rad43                         | 6.60854e-22 | 1.000000 | 6.60854e-22 | 1.000000 |
| rad58                         | 9.21232e-23 | 1.000000 | 9.21232e-23 | 1.000000 |
| rad70                         | 5.38565e-23 | 1.000000 | 5.38565e-23 | 1.000000 |
| rad50                         | 2.41304e-23 | 1.000000 | 2.41304e-23 | 1.000000 |
| rad39                         | 5.27565e-24 | 1.000000 | 5.27565e-24 | 1.000000 |
| PAH1+H                        | 2.89436e-24 | 1.000000 | 2.89436e-24 | 1.000000 |
| rad34                         | 9.13648e-25 | 1.000000 | 9.13648e-25 | 1.000000 |
| rad62                         | 4.26734e-25 | 1.000000 | 4.26734e-25 | 1.000000 |
| rad54                         | 3.52564e-25 | 1.000000 | 3.52564e-25 | 1.000000 |
| rad52                         | 1.63070e-25 | 1.000000 | 1.63070e-25 | 1.000000 |
| rad41                         | 4.96627e-26 | 1.000000 | 4.96627e-26 | 1.000000 |
| rad51                         | 4.87070e-26 | 1.000000 | 4.87070e-26 | 1.000000 |
| rad55                         | 3.19623e-27 | 1.000000 | 3.19623e-27 | 1.000000 |
| rad47                         | 1.24416e-27 | 1.000000 | 1.24416e-27 | 1.000000 |
| rad42                         | 1.29467e-28 | 1.000000 | 1.29467e-28 | 1.000000 |
| rad19syn                      | 4.55295e-29 | 1.000000 | 4.55295e-29 | 1.000000 |
| rad61                         | 5.48903e-30 | 1.000000 | 5.48903e-30 | 1.000000 |
| rad65                         | 4.16336e-30 | 1.000000 | 4.16336e-30 | 1.000000 |
| rad53                         | 1.33752e-31 | 1.000000 | 1.33752e-31 | 1.000000 |
| rad68syn                      | 7.91942e-32 | 1.000000 | 7.91942e-32 | 1.000000 |
| rad68anti                     | 6.16642e-32 | 1.000000 | 6.16642e-32 | 1.000000 |
| rad56                         | 1.58196e-34 | 1.000000 | 1.58196e-34 | 1.000000 |
| rad40syn                      | 1.19430e-34 | 1.000000 | 1.19430e-34 | 1.000000 |
| rad40anti                     | 9.12509e-35 | 1.000000 | 9.12509e-35 | 1.000000 |
| rad64                         | 6.10030e-35 | 1.000000 | 6.10030e-35 | 1.000000 |
| PAH8+H                        | 7.82173e-36 | 1.000000 | 7.82173e-36 | 1.000000 |
| rad73                         | 3.23026e-37 | 1.000000 | 3.23026e-37 | 1.000000 |
| rad71                         | 5.32115e-40 | 1.000000 | 5.32115e-40 | 1.000000 |

1000000.00 Pa, 170.000000 K

=====

| Rate constant             | True (fraction)        | Effective (fraction)   |
|---------------------------|------------------------|------------------------|
| Total                     | 9.49598e-15 (1.00 )    | 9.49598e-15 (1.00 )    |
| Formation of rad19        | 9.49586e-15 (1.000 )   | 9.49586e-15 (1.000 )   |
| H-abstraction to cyc2enyl | 1.24279e-19 (1.31e-05) | 1.24279e-19 (1.31e-05) |
| H-abstraction to cyclenyl | 6.08025e-24 (6.40e-10) | 6.08025e-24 (6.40e-10) |

| species                       | PYtrue      | Cumul    | PYeffective | Cumul    |
|-------------------------------|-------------|----------|-------------|----------|
| rad9                          | 0.896585    | 0.896585 | 0.896585    | 0.896585 |
| rad19anti                     | 0.102159    | 0.998744 | 0.102159    | 0.998744 |
| rad15                         | 0.00120848  | 0.999952 | 0.00120848  | 0.999952 |
| Indene+H                      | 3.35802e-05 | 0.999986 | 3.35802e-05 | 0.999986 |
| Benzene+cycloprop-2-enylidene | 1.30875e-05 | 0.999999 | 1.30875e-05 | 0.999999 |
| rad12                         | 8.85311e-07 | 1.000000 | 8.85311e-07 | 1.000000 |
| PhCHCCH2+H                    | 1.98989e-08 | 1.000000 | 1.98989e-08 | 1.000000 |
| rad11                         | 1.00450e-09 | 1.000000 | 1.00450e-09 | 1.000000 |
| rad2                          | 7.81884e-10 | 1.000000 | 7.81884e-10 | 1.000000 |
| Benzene+cycloprop-1-enylidene | 6.40297e-10 | 1.000000 | 6.40297e-10 | 1.000000 |
| rad18                         | 2.94408e-10 | 1.000000 | 2.94408e-10 | 1.000000 |
| rad7                          | 1.71317e-10 | 1.000000 | 1.71317e-10 | 1.000000 |
| rad26                         | 1.11722e-10 | 1.000000 | 1.11722e-10 | 1.000000 |
| rad1                          | 7.18560e-11 | 1.000000 | 7.18560e-11 | 1.000000 |
| rad6                          | 3.20285e-11 | 1.000000 | 3.20285e-11 | 1.000000 |
| rad20                         | 2.45896e-11 | 1.000000 | 2.45896e-11 | 1.000000 |
| rad21                         | 2.35527e-11 | 1.000000 | 2.35527e-11 | 1.000000 |
| rad22                         | 2.12582e-11 | 1.000000 | 2.12582e-11 | 1.000000 |
| rad67                         | 5.47845e-12 | 1.000000 | 5.47845e-12 | 1.000000 |
| rad45                         | 4.76950e-12 | 1.000000 | 4.76950e-12 | 1.000000 |
| PhcycC3H3_A+H                 | 3.12029e-12 | 1.000000 | 3.12029e-12 | 1.000000 |
| rad35                         | 2.45474e-12 | 1.000000 | 2.45474e-12 | 1.000000 |
| C2H2+PhCH2                    | 1.99899e-12 | 1.000000 | 1.99899e-12 | 1.000000 |
| rad10                         | 6.40302e-13 | 1.000000 | 6.40302e-13 | 1.000000 |
| rad5                          | 4.62882e-13 | 1.000000 | 4.62882e-13 | 1.000000 |
| rad36                         | 3.48286e-13 | 1.000000 | 3.48286e-13 | 1.000000 |
| rad3                          | 1.74459e-13 | 1.000000 | 1.74459e-13 | 1.000000 |
| rad4                          | 1.00447e-13 | 1.000000 | 1.00447e-13 | 1.000000 |
| rad23                         | 9.16912e-14 | 1.000000 | 9.16912e-14 | 1.000000 |
| Phenyl+cycC3H4                | 5.69302e-14 | 1.000000 | 0.000000    | 1.000000 |
| PhCCH3+H                      | 5.50467e-14 | 1.000000 | 5.50467e-14 | 1.000000 |
| Ph+MeAc                       | 3.71871e-14 | 1.000000 | 3.71871e-14 | 1.000000 |
| rad25                         | 1.55836e-14 | 1.000000 | 1.55836e-14 | 1.000000 |
| Ph+Allene                     | 1.54159e-14 | 1.000000 | 1.54159e-14 | 1.000000 |
| rad8                          | 1.35414e-14 | 1.000000 | 1.35414e-14 | 1.000000 |
| PhcycC3H3_B+H                 | 8.02360e-15 | 1.000000 | 8.02360e-15 | 1.000000 |
| rad27                         | 6.99298e-15 | 1.000000 | 6.99298e-15 | 1.000000 |
| rad30                         | 6.30759e-15 | 1.000000 | 6.30759e-15 | 1.000000 |
| rad24                         | 5.39320e-15 | 1.000000 | 5.39320e-15 | 1.000000 |
| PhCH2CCH+H                    | 2.74564e-15 | 1.000000 | 2.74564e-15 | 1.000000 |
| PhCCH+CH3                     | 2.66490e-15 | 1.000000 | 2.66490e-15 | 1.000000 |
| rad13                         | 1.57832e-15 | 1.000000 | 1.57832e-15 | 1.000000 |
| rad37                         | 2.57316e-17 | 1.000000 | 2.57316e-17 | 1.000000 |
| rad60syn                      | 2.20902e-17 | 1.000000 | 2.20902e-17 | 1.000000 |
| rad60anti                     | 1.06700e-17 | 1.000000 | 1.06700e-17 | 1.000000 |
| rad14                         | 1.05243e-17 | 1.000000 | 1.05243e-17 | 1.000000 |
| rad28                         | 1.04933e-17 | 1.000000 | 1.04933e-17 | 1.000000 |
| rad33                         | 9.89529e-18 | 1.000000 | 9.89529e-18 | 1.000000 |
| PAH3+H                        | 8.27968e-18 | 1.000000 | 8.27968e-18 | 1.000000 |
| rad59                         | 1.71093e-18 | 1.000000 | 1.71093e-18 | 1.000000 |
| PAH7+H                        | 1.45479e-18 | 1.000000 | 1.45479e-18 | 1.000000 |
| rad38                         | 1.83498e-19 | 1.000000 | 1.83498e-19 | 1.000000 |
| rad31                         | 4.28114e-20 | 1.000000 | 4.28114e-20 | 1.000000 |
| PAH10+CH3                     | 4.23871e-20 | 1.000000 | 4.23871e-20 | 1.000000 |
| rad46                         | 6.50204e-21 | 1.000000 | 6.50204e-21 | 1.000000 |
| PAH9+H                        | 1.23645e-21 | 1.000000 | 1.23645e-21 | 1.000000 |
| rad43                         | 1.18884e-21 | 1.000000 | 1.18884e-21 | 1.000000 |
| rad58                         | 1.69423e-22 | 1.000000 | 1.69423e-22 | 1.000000 |
| rad70                         | 1.02599e-22 | 1.000000 | 1.02599e-22 | 1.000000 |
| rad50                         | 4.10602e-23 | 1.000000 | 4.10602e-23 | 1.000000 |
| rad39                         | 9.37416e-24 | 1.000000 | 9.37416e-24 | 1.000000 |
| PAH1+H                        | 5.55183e-24 | 1.000000 | 5.55183e-24 | 1.000000 |
| rad34                         | 1.92319e-24 | 1.000000 | 1.92319e-24 | 1.000000 |
| rad62                         | 9.46256e-25 | 1.000000 | 9.46256e-25 | 1.000000 |
| rad54                         | 6.48588e-25 | 1.000000 | 6.48588e-25 | 1.000000 |
| rad52                         | 2.94735e-25 | 1.000000 | 2.94735e-25 | 1.000000 |
| rad41                         | 1.16911e-25 | 1.000000 | 1.16911e-25 | 1.000000 |
| rad51                         | 9.41420e-26 | 1.000000 | 9.41420e-26 | 1.000000 |
| rad55                         | 6.37255e-27 | 1.000000 | 6.37255e-27 | 1.000000 |
| rad47                         | 2.25894e-27 | 1.000000 | 2.25894e-27 | 1.000000 |



|           |             |          |             |          |
|-----------|-------------|----------|-------------|----------|
| rad42     | 3.66996e-28 | 1.000000 | 3.66996e-28 | 1.000000 |
| rad19syn  | 1.03690e-28 | 1.000000 | 1.03690e-28 | 1.000000 |
| rad61     | 2.29778e-29 | 1.000000 | 2.29778e-29 | 1.000000 |
| rad65     | 9.60539e-30 | 1.000000 | 9.60539e-30 | 1.000000 |
| rad53     | 4.30769e-31 | 1.000000 | 4.30769e-31 | 1.000000 |
| rad68syn  | 4.30024e-31 | 1.000000 | 4.30024e-31 | 1.000000 |
| rad68anti | 3.32181e-31 | 1.000000 | 3.32181e-31 | 1.000000 |
| rad40syn  | 1.03210e-33 | 1.000000 | 1.03210e-33 | 1.000000 |
| rad56     | 8.71724e-34 | 1.000000 | 8.71724e-34 | 1.000000 |
| rad40anti | 7.85865e-34 | 1.000000 | 7.85865e-34 | 1.000000 |
| rad64     | 2.43921e-34 | 1.000000 | 2.43921e-34 | 1.000000 |
| PAH8+H    | 9.12419e-35 | 1.000000 | 9.12419e-35 | 1.000000 |
| rad73     | 2.70453e-36 | 1.000000 | 2.70453e-36 | 1.000000 |
| rad71     | 7.10924e-39 | 1.000000 | 7.10924e-39 | 1.000000 |

1000000.00 Pa, 180.000000 K

| Rate constant             | True (fraction)        | Effective (fraction)   |
|---------------------------|------------------------|------------------------|
| Total                     | 1.12884e-14 (1.00 )    | 1.12884e-14 (1.00 )    |
| Formation of rad19        | 1.12881e-14 (1.000 )   | 1.12881e-14 (1.000 )   |
| H-abstraction to cyc2enyl | 2.75916e-19 (2.44e-05) | 2.75916e-19 (2.44e-05) |
| H-abstraction to cyclenyl | 2.39955e-23 (2.13e-09) | 2.39955e-23 (2.13e-09) |

| species                       | PYtrue      | Cumul    | PYeffective | Cumul    |
|-------------------------------|-------------|----------|-------------|----------|
| rad9                          | 0.908777    | 0.908777 | 0.908777    | 0.908777 |
| rad19anti                     | 0.0898445   | 0.998621 | 0.0898445   | 0.998621 |
| rad15                         | 0.00131308  | 0.999934 | 0.00131308  | 0.999934 |
| Indene+H                      | 4.00310e-05 | 0.999974 | 4.00310e-05 | 0.999974 |
| Benzene+cycloprop-2-enylidene | 2.44424e-05 | 0.999999 | 2.44424e-05 | 0.999999 |
| rad12                         | 8.49482e-07 | 1.000000 | 8.49482e-07 | 1.000000 |
| PhCHCCH2+H                    | 2.35862e-08 | 1.000000 | 2.35862e-08 | 1.000000 |
| Benzene+cycloprop-1-enylidene | 2.12567e-09 | 1.000000 | 2.12567e-09 | 1.000000 |
| rad11                         | 1.19367e-09 | 1.000000 | 1.19367e-09 | 1.000000 |
| rad2                          | 9.33926e-10 | 1.000000 | 9.33926e-10 | 1.000000 |
| rad18                         | 3.61079e-10 | 1.000000 | 3.61079e-10 | 1.000000 |
| rad7                          | 1.86972e-10 | 1.000000 | 1.86972e-10 | 1.000000 |
| rad26                         | 1.33752e-10 | 1.000000 | 1.33752e-10 | 1.000000 |
| rad1                          | 8.55514e-11 | 1.000000 | 8.55514e-11 | 1.000000 |
| rad6                          | 4.07714e-11 | 1.000000 | 4.07714e-11 | 1.000000 |
| rad20                         | 3.00112e-11 | 1.000000 | 3.00112e-11 | 1.000000 |
| rad21                         | 2.76719e-11 | 1.000000 | 2.76719e-11 | 1.000000 |
| rad22                         | 2.75209e-11 | 1.000000 | 2.75209e-11 | 1.000000 |
| rad67                         | 7.17502e-12 | 1.000000 | 7.17502e-12 | 1.000000 |
| rad45                         | 6.16197e-12 | 1.000000 | 6.16197e-12 | 1.000000 |
| PhcycC3H3_A+H                 | 4.42987e-12 | 1.000000 | 4.42987e-12 | 1.000000 |
| rad35                         | 3.20266e-12 | 1.000000 | 3.20266e-12 | 1.000000 |
| C2H2+PhCH2                    | 2.81637e-12 | 1.000000 | 2.81637e-12 | 1.000000 |
| rad10                         | 8.53931e-13 | 1.000000 | 8.53931e-13 | 1.000000 |
| rad5                          | 5.39233e-13 | 1.000000 | 5.39233e-13 | 1.000000 |
| rad36                         | 4.48143e-13 | 1.000000 | 4.48143e-13 | 1.000000 |
| rad3                          | 2.34125e-13 | 1.000000 | 2.34125e-13 | 1.000000 |
| rad4                          | 1.34608e-13 | 1.000000 | 1.34608e-13 | 1.000000 |
| rad23                         | 1.30881e-13 | 1.000000 | 1.30881e-13 | 1.000000 |
| Phenyl+cycC3H4                | 8.41162e-14 | 1.000000 | 0.000000    | 1.000000 |
| PhCCCH3+H                     | 7.65830e-14 | 1.000000 | 7.65830e-14 | 1.000000 |
| Ph+MeAc                       | 5.27714e-14 | 1.000000 | 5.27714e-14 | 1.000000 |
| Ph+Allene                     | 2.17201e-14 | 1.000000 | 2.17201e-14 | 1.000000 |
| rad25                         | 2.05951e-14 | 1.000000 | 2.05951e-14 | 1.000000 |
| PhcycC3H3_B+H                 | 1.58434e-14 | 1.000000 | 1.58434e-14 | 1.000000 |
| rad27                         | 9.25929e-15 | 1.000000 | 9.25929e-15 | 1.000000 |
| rad30                         | 8.94312e-15 | 1.000000 | 8.94312e-15 | 1.000000 |
| rad8                          | 6.21731e-15 | 1.000000 | 6.21731e-15 | 1.000000 |
| rad24                         | 6.00925e-15 | 1.000000 | 6.00925e-15 | 1.000000 |
| PhCH2CCH+H                    | 3.97403e-15 | 1.000000 | 3.97403e-15 | 1.000000 |
| PhCCH+CH3                     | 3.76592e-15 | 1.000000 | 3.76592e-15 | 1.000000 |
| rad13                         | 2.10345e-15 | 1.000000 | 2.10345e-15 | 1.000000 |
| rad37                         | 3.70493e-17 | 1.000000 | 3.70493e-17 | 1.000000 |
| rad60syn                      | 3.26692e-17 | 1.000000 | 3.26692e-17 | 1.000000 |
| rad14                         | 1.62372e-17 | 1.000000 | 1.62372e-17 | 1.000000 |
| rad60anti                     | 1.58393e-17 | 1.000000 | 1.58393e-17 | 1.000000 |
| rad28                         | 1.52286e-17 | 1.000000 | 1.52286e-17 | 1.000000 |
| PAH3+H                        | 1.29008e-17 | 1.000000 | 1.29008e-17 | 1.000000 |
| rad33                         | 1.25526e-17 | 1.000000 | 1.25526e-17 | 1.000000 |
| rad59                         | 2.64523e-18 | 1.000000 | 2.64523e-18 | 1.000000 |
| PAH7+H                        | 2.31141e-18 | 1.000000 | 2.31141e-18 | 1.000000 |
| rad38                         | 2.82811e-19 | 1.000000 | 2.82811e-19 | 1.000000 |
| PAH10+CH3                     | 6.99241e-20 | 1.000000 | 6.99241e-20 | 1.000000 |
| rad31                         | 5.18093e-20 | 1.000000 | 5.18093e-20 | 1.000000 |

|           |             |          |             |          |
|-----------|-------------|----------|-------------|----------|
| rad46     | 1.02591e-20 | 1.000000 | 1.02591e-20 | 1.000000 |
| rad43     | 2.16444e-21 | 1.000000 | 2.16444e-21 | 1.000000 |
| PAH9+H    | 2.14911e-21 | 1.000000 | 2.14911e-21 | 1.000000 |
| rad58     | 3.14681e-22 | 1.000000 | 3.14681e-22 | 1.000000 |
| rad70     | 1.97983e-22 | 1.000000 | 1.97983e-22 | 1.000000 |
| rad50     | 7.06292e-23 | 1.000000 | 7.06292e-23 | 1.000000 |
| rad39     | 1.69046e-23 | 1.000000 | 1.69046e-23 | 1.000000 |
| PAH1+H    | 1.07943e-23 | 1.000000 | 1.07943e-23 | 1.000000 |
| rad34     | 4.09718e-24 | 1.000000 | 4.09718e-24 | 1.000000 |
| rad62     | 2.13816e-24 | 1.000000 | 2.13816e-24 | 1.000000 |
| rad54     | 1.21614e-24 | 1.000000 | 1.21614e-24 | 1.000000 |
| rad52     | 5.40150e-25 | 1.000000 | 5.40150e-25 | 1.000000 |
| rad41     | 2.77468e-25 | 1.000000 | 2.77468e-25 | 1.000000 |
| rad51     | 1.84941e-25 | 1.000000 | 1.84941e-25 | 1.000000 |
| rad55     | 1.29670e-26 | 1.000000 | 1.29670e-26 | 1.000000 |
| rad47     | 4.05918e-27 | 1.000000 | 4.05918e-27 | 1.000000 |
| rad42     | 1.05327e-27 | 1.000000 | 1.05327e-27 | 1.000000 |
| rad19syn  | 2.52778e-28 | 1.000000 | 2.52778e-28 | 1.000000 |
| rad61     | 8.99596e-29 | 1.000000 | 8.99596e-29 | 1.000000 |
| rad65     | 2.26285e-29 | 1.000000 | 2.26285e-29 | 1.000000 |
| rad68syn  | 2.13413e-30 | 1.000000 | 2.13413e-30 | 1.000000 |
| rad68anti | 1.63495e-30 | 1.000000 | 1.63495e-30 | 1.000000 |
| rad53     | 1.36708e-30 | 1.000000 | 1.36708e-30 | 1.000000 |
| rad40syn  | 7.78526e-33 | 1.000000 | 7.78526e-33 | 1.000000 |
| rad40anti | 5.90888e-33 | 1.000000 | 5.90888e-33 | 1.000000 |
| rad56     | 4.42239e-33 | 1.000000 | 4.42239e-33 | 1.000000 |
| rad64     | 9.55243e-34 | 1.000000 | 9.55243e-34 | 1.000000 |
| PAH8+H    | 8.97168e-34 | 1.000000 | 8.97168e-34 | 1.000000 |
| rad73     | 2.00571e-35 | 1.000000 | 2.00571e-35 | 1.000000 |
| rad71     | 7.92146e-38 | 1.000000 | 7.92146e-38 | 1.000000 |

1000000.00 Pa, 190.000000 K

| Rate constant             | True (fraction)        | Effective (fraction)   |
|---------------------------|------------------------|------------------------|
| Total                     | 1.32132e-14 (1.00 )    | 1.32132e-14 (1.00 )    |
| Formation of rad19        | 1.32126e-14 (1.000 )   | 1.32126e-14 (1.000 )   |
| H-abstraction to cyc2enyl | 5.62053e-19 (4.25e-05) | 5.62053e-19 (4.25e-05) |
| H-abstraction to cyc1enyl | 8.18073e-23 (6.19e-09) | 8.18073e-23 (6.19e-09) |

| species                       | PYtrue      | Cumul    | PYeffective | Cumul    |
|-------------------------------|-------------|----------|-------------|----------|
| rad9                          | 0.919393    | 0.919393 | 0.919393    | 0.919393 |
| rad19anti                     | 0.0790965   | 0.998489 | 0.0790965   | 0.998489 |
| rad15                         | 0.00141981  | 0.999909 | 0.00141981  | 0.999909 |
| Indene+H                      | 4.74426e-05 | 0.999957 | 4.74426e-05 | 0.999957 |
| Benzene+cycloprop-2-enylidene | 4.25373e-05 | 0.999999 | 4.25373e-05 | 0.999999 |
| rad12                         | 8.16929e-07 | 1.00000  | 8.16929e-07 | 1.00000  |
| PhCHCCH2+H                    | 2.79422e-08 | 1.00000  | 2.79422e-08 | 1.00000  |
| Benzene+cycloprop-1-enylidene | 6.19133e-09 | 1.00000  | 6.19133e-09 | 1.00000  |
| rad11                         | 1.41772e-09 | 1.00000  | 1.41772e-09 | 1.00000  |
| rad2                          | 1.11526e-09 | 1.00000  | 1.11526e-09 | 1.00000  |
| rad18                         | 4.40731e-10 | 1.00000  | 4.40731e-10 | 1.00000  |
| rad7                          | 2.04940e-10 | 1.00000  | 2.04940e-10 | 1.00000  |
| rad26                         | 1.60011e-10 | 1.00000  | 1.60011e-10 | 1.00000  |
| rad1                          | 1.01941e-10 | 1.00000  | 1.01941e-10 | 1.00000  |
| rad6                          | 5.20390e-11 | 1.00000  | 5.20390e-11 | 1.00000  |
| rad20                         | 3.65366e-11 | 1.00000  | 3.65366e-11 | 1.00000  |
| rad22                         | 3.56188e-11 | 1.00000  | 3.56188e-11 | 1.00000  |
| rad21                         | 3.25700e-11 | 1.00000  | 3.25700e-11 | 1.00000  |
| rad67                         | 9.39321e-12 | 1.00000  | 9.39321e-12 | 1.00000  |
| rad45                         | 7.96395e-12 | 1.00000  | 7.96395e-12 | 1.00000  |
| PhcycC3H3_A+H                 | 6.31050e-12 | 1.00000  | 6.31050e-12 | 1.00000  |
| rad35                         | 4.17590e-12 | 1.00000  | 4.17590e-12 | 1.00000  |
| C2H2+PhCH2                    | 3.96590e-12 | 1.00000  | 3.96590e-12 | 1.00000  |
| rad10                         | 1.14036e-12 | 1.00000  | 1.14036e-12 | 1.00000  |
| rad5                          | 6.34769e-13 | 1.00000  | 6.34769e-13 | 1.00000  |
| rad36                         | 5.77318e-13 | 1.00000  | 5.77318e-13 | 1.00000  |
| rad3                          | 3.14671e-13 | 1.00000  | 3.14671e-13 | 1.00000  |
| rad23                         | 1.86895e-13 | 1.00000  | 1.86895e-13 | 1.00000  |
| rad4                          | 1.80714e-13 | 1.00000  | 1.80714e-13 | 1.00000  |
| Phenyl+cycC3H4                | 1.24157e-13 | 1.00000  | 0.00000     | 1.00000  |
| PhCCCH3+H                     | 1.07035e-13 | 1.00000  | 1.07035e-13 | 1.00000  |
| Ph+MeAc                       | 7.53420e-14 | 1.00000  | 7.53420e-14 | 1.00000  |
| Ph+Allene                     | 3.07596e-14 | 1.00000  | 3.07596e-14 | 1.00000  |
| PhcycC3H3_B+H                 | 3.04405e-14 | 1.00000  | 3.04405e-14 | 1.00000  |
| rad25                         | 2.72071e-14 | 1.00000  | 2.72071e-14 | 1.00000  |
| rad30                         | 1.26674e-14 | 1.00000  | 1.26674e-14 | 1.00000  |
| rad27                         | 1.22563e-14 | 1.00000  | 1.22563e-14 | 1.00000  |
| rad24                         | 6.73001e-15 | 1.00000  | 6.73001e-15 | 1.00000  |

|            |             |         |             |         |
|------------|-------------|---------|-------------|---------|
| PhCH2CCH+H | 5.79207e-15 | 1.00000 | 5.79207e-15 | 1.00000 |
| PhCCH+CH3  | 5.43091e-15 | 1.00000 | 5.43091e-15 | 1.00000 |
| rad8       | 2.98235e-15 | 1.00000 | 2.98235e-15 | 1.00000 |
| rad13      | 2.80675e-15 | 1.00000 | 2.80675e-15 | 1.00000 |
| rad37      | 5.36414e-17 | 1.00000 | 5.36414e-17 | 1.00000 |
| rad60syn   | 4.84078e-17 | 1.00000 | 4.84078e-17 | 1.00000 |
| rad14      | 2.51758e-17 | 1.00000 | 2.51758e-17 | 1.00000 |
| rad60anti  | 2.35645e-17 | 1.00000 | 2.35645e-17 | 1.00000 |
| rad28      | 2.22478e-17 | 1.00000 | 2.22478e-17 | 1.00000 |
| PAH3+H     | 2.02078e-17 | 1.00000 | 2.02078e-17 | 1.00000 |
| rad33      | 1.59588e-17 | 1.00000 | 1.59588e-17 | 1.00000 |
| rad59      | 4.10904e-18 | 1.00000 | 4.10904e-18 | 1.00000 |
| PAH7+H     | 3.70333e-18 | 1.00000 | 3.70333e-18 | 1.00000 |
| rad38      | 4.39152e-19 | 1.00000 | 4.39152e-19 | 1.00000 |
| PAH10+CH3  | 1.16811e-19 | 1.00000 | 1.16811e-19 | 1.00000 |
| rad31      | 6.31023e-20 | 1.00000 | 6.31023e-20 | 1.00000 |
| rad46      | 1.63098e-20 | 1.00000 | 1.63098e-20 | 1.00000 |
| rad43      | 3.99146e-21 | 1.00000 | 3.99146e-21 | 1.00000 |
| PAH9+H     | 3.77041e-21 | 1.00000 | 3.77041e-21 | 1.00000 |
| rad58      | 5.90400e-22 | 1.00000 | 5.90400e-22 | 1.00000 |
| rad70      | 3.86970e-22 | 1.00000 | 3.86970e-22 | 1.00000 |
| rad50      | 1.23057e-22 | 1.00000 | 1.23057e-22 | 1.00000 |
| rad39      | 3.10020e-23 | 1.00000 | 3.10020e-23 | 1.00000 |
| PAH1+H     | 2.12661e-23 | 1.00000 | 2.12661e-23 | 1.00000 |
| rad34      | 8.82426e-24 | 1.00000 | 8.82426e-24 | 1.00000 |
| rad62      | 4.92304e-24 | 1.00000 | 4.92304e-24 | 1.00000 |
| rad54      | 2.32466e-24 | 1.00000 | 2.32466e-24 | 1.00000 |
| rad52      | 1.00520e-24 | 1.00000 | 1.00520e-24 | 1.00000 |
| rad41      | 6.62985e-25 | 1.00000 | 6.62985e-25 | 1.00000 |
| rad51      | 3.69535e-25 | 1.00000 | 3.69535e-25 | 1.00000 |
| rad55      | 2.69030e-26 | 1.00000 | 2.69030e-26 | 1.00000 |
| rad47      | 7.22018e-27 | 1.00000 | 7.22018e-27 | 1.00000 |
| rad42      | 3.05397e-27 | 1.00000 | 3.05397e-27 | 1.00000 |
| rad19syn   | 6.58073e-28 | 1.00000 | 6.58073e-28 | 1.00000 |
| rad61      | 3.32316e-28 | 1.00000 | 3.32316e-28 | 1.00000 |
| rad65      | 5.44165e-29 | 1.00000 | 5.44165e-29 | 1.00000 |
| rad68syn   | 9.78746e-30 | 1.00000 | 9.78746e-30 | 1.00000 |
| rad68anti  | 7.43611e-30 | 1.00000 | 7.43611e-30 | 1.00000 |
| rad53      | 4.28151e-30 | 1.00000 | 4.28151e-30 | 1.00000 |
| rad40syn   | 5.19002e-32 | 1.00000 | 5.19002e-32 | 1.00000 |
| rad40anti  | 3.92877e-32 | 1.00000 | 3.92877e-32 | 1.00000 |
| rad56      | 2.08934e-32 | 1.00000 | 2.08934e-32 | 1.00000 |
| PAH8+H     | 7.52381e-33 | 1.00000 | 7.52381e-33 | 1.00000 |
| rad64      | 3.66962e-33 | 1.00000 | 3.66962e-33 | 1.00000 |
| rad73      | 1.33120e-34 | 1.00000 | 1.33120e-34 | 1.00000 |
| rad71      | 7.44071e-37 | 1.00000 | 7.44071e-37 | 1.00000 |

1000000.00 Pa, 200.000000 K

=====

| Rate constant             | True (fraction)        | Effective (fraction)   |
|---------------------------|------------------------|------------------------|
| Total                     | 1.52621e-14 (1.00 )    | 1.52621e-14 (1.00 )    |
| Formation of rad19        | 1.52610e-14 (1.000 )   | 1.52610e-14 (1.000 )   |
| H-abstraction to cyc2enyl | 1.06427e-18 (6.97e-05) | 1.06427e-18 (6.97e-05) |
| H-abstraction to cyc1enyl | 2.46309e-22 (1.61e-08) | 2.46309e-22 (1.61e-08) |

| species                       | PYtrue      | Cumul    | PYeffective | Cumul    |
|-------------------------------|-------------|----------|-------------|----------|
| rad9                          | 0.928622    | 0.928622 | 0.928622    | 0.928622 |
| rad19anti                     | 0.0697224   | 0.998345 | 0.0697224   | 0.998345 |
| rad15                         | 0.00152865  | 0.999873 | 0.00152865  | 0.999873 |
| Benzene+cycloprop-2-enylidene | 6.97330e-05 | 0.999943 | 6.97330e-05 | 0.999943 |
| Indene+H                      | 5.59565e-05 | 0.999999 | 5.59565e-05 | 0.999999 |
| rad12                         | 7.87256e-07 | 1.000000 | 7.87256e-07 | 1.000000 |
| PhCHCCH2+H                    | 3.31133e-08 | 1.000000 | 3.31133e-08 | 1.000000 |
| Benzene+cycloprop-1-enylidene | 1.61386e-08 | 1.000000 | 1.61386e-08 | 1.000000 |
| rad11                         | 1.68430e-09 | 1.000000 | 1.68430e-09 | 1.000000 |
| rad2                          | 1.33263e-09 | 1.000000 | 1.33263e-09 | 1.000000 |
| rad18                         | 5.35864e-10 | 1.000000 | 5.35864e-10 | 1.000000 |
| rad7                          | 2.25611e-10 | 1.000000 | 2.25611e-10 | 1.000000 |
| rad26                         | 1.91462e-10 | 1.000000 | 1.91462e-10 | 1.000000 |
| rad1                          | 1.21673e-10 | 1.000000 | 1.21673e-10 | 1.000000 |
| rad6                          | 6.66497e-11 | 1.000000 | 6.66497e-11 | 1.000000 |
| rad22                         | 4.61359e-11 | 1.000000 | 4.61359e-11 | 1.000000 |
| rad20                         | 4.44071e-11 | 1.000000 | 4.44071e-11 | 1.000000 |
| rad21                         | 3.84227e-11 | 1.000000 | 3.84227e-11 | 1.000000 |
| rad67                         | 1.23065e-11 | 1.000000 | 1.23065e-11 | 1.000000 |
| rad45                         | 1.03084e-11 | 1.000000 | 1.03084e-11 | 1.000000 |
| PhcycC3H3_A+H                 | 9.01490e-12 | 1.000000 | 9.01490e-12 | 1.000000 |
| C2H2+PhCH2                    | 5.58906e-12 | 1.000000 | 5.58906e-12 | 1.000000 |

|                |             |          |             |          |
|----------------|-------------|----------|-------------|----------|
| rad35          | 5.44792e-12 | 1.000000 | 5.44792e-12 | 1.000000 |
| rad10          | 1.52699e-12 | 1.000000 | 1.52699e-12 | 1.000000 |
| rad5           | 7.55533e-13 | 1.000000 | 7.55533e-13 | 1.000000 |
| rad36          | 7.45445e-13 | 1.000000 | 7.45445e-13 | 1.000000 |
| rad3           | 4.24120e-13 | 1.000000 | 4.24120e-13 | 1.000000 |
| rad23          | 2.67425e-13 | 1.000000 | 2.67425e-13 | 1.000000 |
| rad4           | 2.43373e-13 | 1.000000 | 2.43373e-13 | 1.000000 |
| Phenyl+cycC3H4 | 1.83045e-13 | 1.000000 | 0.000000    | 1.000000 |
| PhCCCH3+H      | 1.50498e-13 | 1.000000 | 1.50498e-13 | 1.000000 |
| Ph+MeAc        | 1.08369e-13 | 1.000000 | 1.08369e-13 | 1.000000 |
| PhcycC3H3_B+H  | 5.71148e-14 | 1.000000 | 5.71148e-14 | 1.000000 |
| Ph+Allene      | 4.38417e-14 | 1.000000 | 4.38417e-14 | 1.000000 |
| rad25          | 3.59616e-14 | 1.000000 | 3.59616e-14 | 1.000000 |
| rad30          | 1.79512e-14 | 1.000000 | 1.79512e-14 | 1.000000 |
| rad27          | 1.62334e-14 | 1.000000 | 1.62334e-14 | 1.000000 |
| PhCH2CCH+H     | 8.51101e-15 | 1.000000 | 8.51101e-15 | 1.000000 |
| PhCCH+CH3      | 7.99948e-15 | 1.000000 | 7.99948e-15 | 1.000000 |
| rad24          | 7.57725e-15 | 1.000000 | 7.57725e-15 | 1.000000 |
| rad13          | 3.75310e-15 | 1.000000 | 3.75310e-15 | 1.000000 |
| rad8           | 1.49004e-15 | 1.000000 | 1.49004e-15 | 1.000000 |
| rad37          | 7.82052e-17 | 1.000000 | 7.82052e-17 | 1.000000 |
| rad60syn       | 7.19691e-17 | 1.000000 | 7.19691e-17 | 1.000000 |
| rad14          | 3.92849e-17 | 1.000000 | 3.92849e-17 | 1.000000 |
| rad60anti      | 3.51831e-17 | 1.000000 | 3.51831e-17 | 1.000000 |
| rad28          | 3.27659e-17 | 1.000000 | 3.27659e-17 | 1.000000 |
| PAH3+H         | 3.18604e-17 | 1.000000 | 3.18604e-17 | 1.000000 |
| rad33          | 2.03509e-17 | 1.000000 | 2.03509e-17 | 1.000000 |
| rad59          | 6.42090e-18 | 1.000000 | 6.42090e-18 | 1.000000 |
| PAH7+H         | 5.98943e-18 | 1.000000 | 5.98943e-18 | 1.000000 |
| rad38          | 6.88058e-19 | 1.000000 | 6.88058e-19 | 1.000000 |
| PAH10+CH3      | 1.97712e-19 | 1.000000 | 1.97712e-19 | 1.000000 |
| rad31          | 7.74293e-20 | 1.000000 | 7.74293e-20 | 1.000000 |
| rad46          | 2.61692e-20 | 1.000000 | 2.61692e-20 | 1.000000 |
| rad43          | 7.45623e-21 | 1.000000 | 7.45623e-21 | 1.000000 |
| PAH9+H         | 6.69035e-21 | 1.000000 | 6.69035e-21 | 1.000000 |
| rad58          | 1.11837e-21 | 1.000000 | 1.11837e-21 | 1.000000 |
| rad70          | 7.65495e-22 | 1.000000 | 7.65495e-22 | 1.000000 |
| rad50          | 2.17431e-22 | 1.000000 | 2.17431e-22 | 1.000000 |
| rad39          | 5.78920e-23 | 1.000000 | 5.78920e-23 | 1.000000 |
| PAH1+H         | 4.24215e-23 | 1.000000 | 4.24215e-23 | 1.000000 |
| rad34          | 1.91827e-23 | 1.000000 | 1.91827e-23 | 1.000000 |
| rad62          | 1.15381e-23 | 1.000000 | 1.15381e-23 | 1.000000 |
| rad54          | 4.52754e-24 | 1.000000 | 4.52754e-24 | 1.000000 |
| rad52          | 1.90077e-24 | 1.000000 | 1.90077e-24 | 1.000000 |
| rad41          | 1.59235e-24 | 1.000000 | 1.59235e-24 | 1.000000 |
| rad51          | 7.50939e-25 | 1.000000 | 7.50939e-25 | 1.000000 |
| rad55          | 5.68250e-26 | 1.000000 | 5.68250e-26 | 1.000000 |
| rad47          | 1.27162e-26 | 1.000000 | 1.27162e-26 | 1.000000 |
| rad42          | 8.92314e-27 | 1.000000 | 8.92314e-27 | 1.000000 |
| rad19syn       | 1.82551e-27 | 1.000000 | 1.82551e-27 | 1.000000 |
| rad61          | 1.16700e-27 | 1.000000 | 1.16700e-27 | 1.000000 |
| rad65          | 1.33412e-28 | 1.000000 | 1.33412e-28 | 1.000000 |
| rad68syn       | 4.18608e-29 | 1.000000 | 4.18608e-29 | 1.000000 |
| rad68anti      | 3.15489e-29 | 1.000000 | 3.15489e-29 | 1.000000 |
| rad53          | 1.32444e-29 | 1.000000 | 1.32444e-29 | 1.000000 |
| rad40syn       | 3.09020e-31 | 1.000000 | 3.09020e-31 | 1.000000 |
| rad40anti      | 2.33506e-31 | 1.000000 | 2.33506e-31 | 1.000000 |
| rad56          | 9.27032e-32 | 1.000000 | 9.27032e-32 | 1.000000 |
| PAH8+H         | 5.44281e-32 | 1.000000 | 5.44281e-32 | 1.000000 |
| rad64          | 1.38328e-32 | 1.000000 | 1.38328e-32 | 1.000000 |
| rad73          | 7.97281e-34 | 1.000000 | 7.97281e-34 | 1.000000 |
| rad71          | 5.95918e-36 | 1.000000 | 5.95918e-36 | 1.000000 |

1000000.00 Pa, 210.000000 K

=====

| Rate constant             | True (fraction)        | Effective (fraction)   |
|---------------------------|------------------------|------------------------|
| Total                     | 1.74272e-14 (1.00 )    | 1.74272e-14 (1.00 )    |
| Formation of rad19        | 1.74253e-14 (1.000 )   | 1.74253e-14 (1.000 )   |
| H-abstraction to cyc2enyl | 1.89310e-18 (0.000109) | 1.89310e-18 (0.000109) |
| H-abstraction to cyclenyl | 6.66714e-22 (3.83e-08) | 6.66714e-22 (3.83e-08) |

| species                       | PYtrue      | Cumul    | PYeffective | Cumul    |
|-------------------------------|-------------|----------|-------------|----------|
| rad9                          | 0.936629    | 0.936629 | 0.936629    | 0.936629 |
| rad19anti                     | 0.0615564   | 0.998186 | 0.0615564   | 0.998186 |
| rad15                         | 0.00163957  | 0.999825 | 0.00163957  | 0.999825 |
| Benzene+cycloprop-2-enylidene | 0.000108629 | 0.999934 | 0.000108629 | 0.999934 |
| Indene+H                      | 6.57377e-05 | 1.000000 | 6.57377e-05 | 1.000000 |
| rad12                         | 7.60134e-07 | 1.000000 | 7.60134e-07 | 1.000000 |

|                               |             |         |             |         |
|-------------------------------|-------------|---------|-------------|---------|
| PhCCCH2+H                     | 3.92816e-08 | 1.00000 | 3.92816e-08 | 1.00000 |
| Benzene+cycloprop-1-enylidene | 3.82571e-08 | 1.00000 | 3.82571e-08 | 1.00000 |
| rad11                         | 2.00288e-09 | 1.00000 | 2.00288e-09 | 1.00000 |
| rad2                          | 1.59442e-09 | 1.00000 | 1.59442e-09 | 1.00000 |
| rad18                         | 6.49430e-10 | 1.00000 | 6.49430e-10 | 1.00000 |
| rad7                          | 2.49438e-10 | 1.00000 | 2.49438e-10 | 1.00000 |
| rad26                         | 2.29306e-10 | 1.00000 | 2.29306e-10 | 1.00000 |
| rad1                          | 1.45566e-10 | 1.00000 | 1.45566e-10 | 1.00000 |
| rad6                          | 8.57115e-11 | 1.00000 | 8.57115e-11 | 1.00000 |
| rad22                         | 5.98531e-11 | 1.00000 | 5.98531e-11 | 1.00000 |
| rad20                         | 5.39167e-11 | 1.00000 | 5.39167e-11 | 1.00000 |
| rad21                         | 4.54443e-11 | 1.00000 | 4.54443e-11 | 1.00000 |
| rad67                         | 1.61505e-11 | 1.00000 | 1.61505e-11 | 1.00000 |
| rad45                         | 1.33748e-11 | 1.00000 | 1.33748e-11 | 1.00000 |
| PhcycC3H3_A+H                 | 1.29062e-11 | 1.00000 | 1.29062e-11 | 1.00000 |
| C2H2+PhCH2                    | 7.89027e-12 | 1.00000 | 7.89027e-12 | 1.00000 |
| rad35                         | 7.11792e-12 | 1.00000 | 7.11792e-12 | 1.00000 |
| rad10                         | 2.05255e-12 | 1.00000 | 2.05255e-12 | 1.00000 |
| rad36                         | 9.65588e-13 | 1.00000 | 9.65588e-13 | 1.00000 |
| rad5                          | 9.09675e-13 | 1.00000 | 9.09675e-13 | 1.00000 |
| rad3                          | 5.73848e-13 | 1.00000 | 5.73848e-13 | 1.00000 |
| rad23                         | 3.83916e-13 | 1.00000 | 3.83916e-13 | 1.00000 |
| rad4                          | 3.29126e-13 | 1.00000 | 3.29126e-13 | 1.00000 |
| Phenyl+cycC3H4                | 2.69476e-13 | 1.00000 | 0.00000     | 1.00000 |
| PhCCCH3+H                     | 2.13116e-13 | 1.00000 | 2.13116e-13 | 1.00000 |
| Ph+MeAc                       | 1.57201e-13 | 1.00000 | 1.57201e-13 | 1.00000 |
| PhcycC3H3_B+H                 | 1.04953e-13 | 1.00000 | 1.04953e-13 | 1.00000 |
| Ph+Allene                     | 6.29507e-14 | 1.00000 | 6.29507e-14 | 1.00000 |
| rad25                         | 4.75895e-14 | 1.00000 | 4.75895e-14 | 1.00000 |
| rad30                         | 2.54794e-14 | 1.00000 | 2.54794e-14 | 1.00000 |
| rad27                         | 2.15280e-14 | 1.00000 | 2.15280e-14 | 1.00000 |
| PhCH2CCH+H                    | 1.26193e-14 | 1.00000 | 1.26193e-14 | 1.00000 |
| PhCCH+CH3                     | 1.20388e-14 | 1.00000 | 1.20388e-14 | 1.00000 |
| rad24                         | 8.57686e-15 | 1.00000 | 8.57686e-15 | 1.00000 |
| rad13                         | 5.03239e-15 | 1.00000 | 5.03239e-15 | 1.00000 |
| rad8                          | 7.73350e-16 | 1.00000 | 7.73350e-16 | 1.00000 |
| rad37                         | 1.14931e-16 | 1.00000 | 1.14931e-16 | 1.00000 |
| rad60syn                      | 1.07461e-16 | 1.00000 | 1.07461e-16 | 1.00000 |
| rad14                         | 6.17483e-17 | 1.00000 | 6.17483e-17 | 1.00000 |
| rad60anti                     | 5.27696e-17 | 1.00000 | 5.27696e-17 | 1.00000 |
| PAH3+H                        | 5.05949e-17 | 1.00000 | 5.05949e-17 | 1.00000 |
| rad28                         | 4.87017e-17 | 1.00000 | 4.87017e-17 | 1.00000 |
| rad33                         | 2.60465e-17 | 1.00000 | 2.60465e-17 | 1.00000 |
| rad59                         | 1.01006e-17 | 1.00000 | 1.01006e-17 | 1.00000 |
| PAH7+H                        | 9.78263e-18 | 1.00000 | 9.78263e-18 | 1.00000 |
| rad38                         | 1.08884e-18 | 1.00000 | 1.08884e-18 | 1.00000 |
| PAH10+CH3                     | 3.39071e-19 | 1.00000 | 3.39071e-19 | 1.00000 |
| rad31                         | 9.58066e-20 | 1.00000 | 9.58066e-20 | 1.00000 |
| rad46                         | 4.24282e-20 | 1.00000 | 4.24282e-20 | 1.00000 |
| rad43                         | 1.41024e-20 | 1.00000 | 1.41024e-20 | 1.00000 |
| PAH9+H                        | 1.20236e-20 | 1.00000 | 1.20236e-20 | 1.00000 |
| rad58                         | 2.13686e-21 | 1.00000 | 2.13686e-21 | 1.00000 |
| rad70                         | 1.53063e-21 | 1.00000 | 1.53063e-21 | 1.00000 |
| rad50                         | 3.89850e-22 | 1.00000 | 3.89850e-22 | 1.00000 |
| rad39                         | 1.10132e-22 | 1.00000 | 1.10132e-22 | 1.00000 |
| PAH1+H                        | 8.55964e-23 | 1.00000 | 8.55964e-23 | 1.00000 |
| rad34                         | 4.20118e-23 | 1.00000 | 4.20118e-23 | 1.00000 |
| rad62                         | 2.74764e-23 | 1.00000 | 2.74764e-23 | 1.00000 |
| rad54                         | 8.97524e-24 | 1.00000 | 8.97524e-24 | 1.00000 |
| rad41                         | 3.83790e-24 | 1.00000 | 3.83790e-24 | 1.00000 |
| rad52                         | 3.65222e-24 | 1.00000 | 3.65222e-24 | 1.00000 |
| rad51                         | 1.55092e-24 | 1.00000 | 1.55092e-24 | 1.00000 |
| rad55                         | 1.21972e-25 | 1.00000 | 1.21972e-25 | 1.00000 |
| rad42                         | 2.61952e-26 | 1.00000 | 2.61952e-26 | 1.00000 |
| rad47                         | 2.21861e-26 | 1.00000 | 2.21861e-26 | 1.00000 |
| rad19syn                      | 5.38418e-27 | 1.00000 | 5.38418e-27 | 1.00000 |
| rad61                         | 3.91858e-27 | 1.00000 | 3.91858e-27 | 1.00000 |
| rad65                         | 3.32814e-28 | 1.00000 | 3.32814e-28 | 1.00000 |
| rad68syn                      | 1.68085e-28 | 1.00000 | 1.68085e-28 | 1.00000 |
| rad68anti                     | 1.25725e-28 | 1.00000 | 1.25725e-28 | 1.00000 |
| rad53                         | 4.04678e-29 | 1.00000 | 4.04678e-29 | 1.00000 |
| rad40syn                      | 1.65665e-30 | 1.00000 | 1.65665e-30 | 1.00000 |
| rad40anti                     | 1.25081e-30 | 1.00000 | 1.25081e-30 | 1.00000 |
| rad56                         | 3.88239e-31 | 1.00000 | 3.88239e-31 | 1.00000 |
| PAH8+H                        | 3.43171e-31 | 1.00000 | 3.43171e-31 | 1.00000 |
| rad64                         | 5.10848e-32 | 1.00000 | 5.10848e-32 | 1.00000 |
| rad73                         | 4.33410e-33 | 1.00000 | 4.33410e-33 | 1.00000 |
| rad71                         | 4.11518e-35 | 1.00000 | 4.11518e-35 | 1.00000 |

1000000.00 Pa, 220.000000 K

=====

| Rate constant             | True (fraction)        | Effective (fraction)   |
|---------------------------|------------------------|------------------------|
| Total                     | 1.97009e-14 (1.00 )    | 1.97009e-14 (1.00 )    |
| Formation of rad19        | 1.96977e-14 (1.000 )   | 1.96977e-14 (1.000 )   |
| H-abstraction to cyc2enyl | 3.19064e-18 (0.000162) | 3.19064e-18 (0.000162) |
| H-abstraction to cyclenyl | 1.64627e-21 (8.36e-08) | 1.64627e-21 (8.36e-08) |

| species                       | PYtrue      | Cumul    | PYeffective | Cumul    |
|-------------------------------|-------------|----------|-------------|----------|
| rad9                          | 0.943554    | 0.943554 | 0.943554    | 0.943554 |
| rad19anti                     | 0.0544539   | 0.998008 | 0.0544539   | 0.998008 |
| rad15                         | 0.00175249  | 0.999760 | 0.00175249  | 0.999760 |
| Benzene+cycloprop-2-enylidene | 0.000161954 | 0.999922 | 0.000161954 | 0.999922 |
| Indene+H                      | 7.69777e-05 | 0.999999 | 7.69777e-05 | 0.999999 |
| rad12                         | 7.35293e-07 | 1.00000  | 7.35293e-07 | 1.00000  |
| Benzene+cycloprop-1-enylidene | 8.35632e-08 | 1.00000  | 8.35632e-08 | 1.00000  |
| PhCHCCH2+H                    | 4.66736e-08 | 1.00000  | 4.66736e-08 | 1.00000  |
| rad11                         | 2.38516e-09 | 1.00000  | 2.38516e-09 | 1.00000  |
| rad2                          | 1.91117e-09 | 1.00000  | 1.91117e-09 | 1.00000  |
| rad18                         | 7.84894e-10 | 1.00000  | 7.84894e-10 | 1.00000  |
| rad7                          | 2.76941e-10 | 1.00000  | 2.76941e-10 | 1.00000  |
| rad26                         | 2.75053e-10 | 1.00000  | 2.75053e-10 | 1.00000  |
| rad1                          | 1.74666e-10 | 1.00000  | 1.74666e-10 | 1.00000  |
| rad6                          | 1.10730e-10 | 1.00000  | 1.10730e-10 | 1.00000  |
| rad22                         | 7.78157e-11 | 1.00000  | 7.78157e-11 | 1.00000  |
| rad20                         | 6.54213e-11 | 1.00000  | 6.54213e-11 | 1.00000  |
| rad21                         | 5.38946e-11 | 1.00000  | 5.38946e-11 | 1.00000  |
| rad67                         | 2.12453e-11 | 1.00000  | 2.12453e-11 | 1.00000  |
| PhcycC3H3_A+H                 | 1.85047e-11 | 1.00000  | 1.85047e-11 | 1.00000  |
| rad45                         | 1.74059e-11 | 1.00000  | 1.74059e-11 | 1.00000  |
| C2H2+PhCH2                    | 1.11654e-11 | 1.00000  | 1.11654e-11 | 1.00000  |
| rad35                         | 9.32003e-12 | 1.00000  | 9.32003e-12 | 1.00000  |
| rad10                         | 2.77198e-12 | 1.00000  | 2.77198e-12 | 1.00000  |
| rad36                         | 1.25552e-12 | 1.00000  | 1.25552e-12 | 1.00000  |
| rad5                          | 1.10823e-12 | 1.00000  | 1.10823e-12 | 1.00000  |
| rad3                          | 7.80047e-13 | 1.00000  | 7.80047e-13 | 1.00000  |
| rad23                         | 5.53488e-13 | 1.00000  | 5.53488e-13 | 1.00000  |
| rad4                          | 4.47308e-13 | 1.00000  | 4.47308e-13 | 1.00000  |
| Phenyl+cycC3H4                | 3.95996e-13 | 1.00000  | 0.00000     | 1.00000  |
| PhCCCH3+H                     | 3.04196e-13 | 1.00000  | 3.04196e-13 | 1.00000  |
| Ph+MeAc                       | 2.30154e-13 | 1.00000  | 2.30154e-13 | 1.00000  |
| PhcycC3H3_B+H                 | 1.89323e-13 | 1.00000  | 1.89323e-13 | 1.00000  |
| Ph+Allene                     | 9.11171e-14 | 1.00000  | 9.11171e-14 | 1.00000  |
| rad25                         | 6.30759e-14 | 1.00000  | 6.30759e-14 | 1.00000  |
| rad30                         | 3.62498e-14 | 1.00000  | 3.62498e-14 | 1.00000  |
| rad27                         | 2.85956e-14 | 1.00000  | 2.85956e-14 | 1.00000  |
| PhCH2CCH+H                    | 1.88896e-14 | 1.00000  | 1.88896e-14 | 1.00000  |
| PhCCH+CH3                     | 1.85083e-14 | 1.00000  | 1.85083e-14 | 1.00000  |
| rad24                         | 9.75952e-15 | 1.00000  | 9.75952e-15 | 1.00000  |
| rad13                         | 6.76950e-15 | 1.00000  | 6.76950e-15 | 1.00000  |
| rad8                          | 4.16033e-16 | 1.00000  | 4.16033e-16 | 1.00000  |
| rad37                         | 1.70373e-16 | 1.00000  | 1.70373e-16 | 1.00000  |
| rad60syn                      | 1.61250e-16 | 1.00000  | 1.61250e-16 | 1.00000  |
| rad14                         | 9.78068e-17 | 1.00000  | 9.78068e-17 | 1.00000  |
| PAH3+H                        | 8.09470e-17 | 1.00000  | 8.09470e-17 | 1.00000  |
| rad60anti                     | 7.95527e-17 | 1.00000  | 7.95527e-17 | 1.00000  |
| rad28                         | 7.31117e-17 | 1.00000  | 7.31117e-17 | 1.00000  |
| rad33                         | 3.34735e-17 | 1.00000  | 3.34735e-17 | 1.00000  |
| PAH7+H                        | 1.61364e-17 | 1.00000  | 1.61364e-17 | 1.00000  |
| rad59                         | 1.59999e-17 | 1.00000  | 1.59999e-17 | 1.00000  |
| rad38                         | 1.74142e-18 | 1.00000  | 1.74142e-18 | 1.00000  |
| PAH10+CH3                     | 5.88982e-19 | 1.00000  | 5.88982e-19 | 1.00000  |
| rad31                         | 1.19648e-19 | 1.00000  | 1.19648e-19 | 1.00000  |
| rad46                         | 6.95627e-20 | 1.00000  | 6.95627e-20 | 1.00000  |
| rad43                         | 2.69813e-20 | 1.00000  | 2.69813e-20 | 1.00000  |
| PAH9+H                        | 2.19025e-20 | 1.00000  | 2.19025e-20 | 1.00000  |
| rad58                         | 4.11304e-21 | 1.00000  | 4.11304e-21 | 1.00000  |
| rad70                         | 3.08868e-21 | 1.00000  | 3.08868e-21 | 1.00000  |
| rad50                         | 7.09405e-22 | 1.00000  | 7.09405e-22 | 1.00000  |
| rad39                         | 2.13424e-22 | 1.00000  | 2.13424e-22 | 1.00000  |
| PAH1+H                        | 1.74501e-22 | 1.00000  | 1.74501e-22 | 1.00000  |
| rad34                         | 9.25123e-23 | 1.00000  | 9.25123e-23 | 1.00000  |
| rad62                         | 6.63222e-23 | 1.00000  | 6.63222e-23 | 1.00000  |
| rad54                         | 1.80843e-23 | 1.00000  | 1.80843e-23 | 1.00000  |
| rad41                         | 9.26615e-24 | 1.00000  | 9.26615e-24 | 1.00000  |
| rad52                         | 7.12742e-24 | 1.00000  | 7.12742e-24 | 1.00000  |
| rad51                         | 3.25187e-24 | 1.00000  | 3.25187e-24 | 1.00000  |
| rad55                         | 2.65498e-25 | 1.00000  | 2.65498e-25 | 1.00000  |
| rad42                         | 7.69839e-26 | 1.00000  | 7.69839e-26 | 1.00000  |

|           |             |         |             |         |
|-----------|-------------|---------|-------------|---------|
| rad47     | 3.83763e-26 | 1.00000 | 3.83763e-26 | 1.00000 |
| rad19syn  | 1.68451e-26 | 1.00000 | 1.68451e-26 | 1.00000 |
| rad61     | 1.26301e-26 | 1.00000 | 1.26301e-26 | 1.00000 |
| rad65     | 8.42513e-28 | 1.00000 | 8.42513e-28 | 1.00000 |
| rad68syn  | 6.36193e-28 | 1.00000 | 6.36193e-28 | 1.00000 |
| rad68anti | 4.72613e-28 | 1.00000 | 4.72613e-28 | 1.00000 |
| rad53     | 1.21984e-28 | 1.00000 | 1.21984e-28 | 1.00000 |
| rad40syn  | 8.04450e-30 | 1.00000 | 8.04450e-30 | 1.00000 |
| rad40anti | 6.07510e-30 | 1.00000 | 6.07510e-30 | 1.00000 |
| PAH8+H    | 1.90371e-30 | 1.00000 | 1.90371e-30 | 1.00000 |
| rad56     | 1.53751e-30 | 1.00000 | 1.53751e-30 | 1.00000 |
| rad64     | 1.84095e-31 | 1.00000 | 1.84095e-31 | 1.00000 |
| rad73     | 2.14703e-32 | 1.00000 | 2.14703e-32 | 1.00000 |
| rad71     | 2.47723e-34 | 1.00000 | 2.47723e-34 | 1.00000 |

1000000.00 Pa, 230.000000 K

| Rate constant             | True (fraction)        | Effective (fraction)   |
|---------------------------|------------------------|------------------------|
| Total                     | 2.20761e-14 (1.00 )    | 2.20761e-14 (1.00 )    |
| Formation of rad19        | 2.20710e-14 (1.000 )   | 2.20710e-14 (1.000 )   |
| H-abstraction to cyc2enyl | 5.13155e-18 (0.000232) | 5.13155e-18 (0.000232) |
| H-abstraction to cyclenyl | 3.75316e-21 (1.70e-07) | 3.75316e-21 (1.70e-07) |

| species                       | PYtrue      | Cumul    | PYeffective | Cumul    |
|-------------------------------|-------------|----------|-------------|----------|
| rad9                          | 0.949521    | 0.949521 | 0.949521    | 0.949521 |
| rad19anti                     | 0.0482887   | 0.997810 | 0.0482887   | 0.997810 |
| rad15                         | 0.00186729  | 0.999677 | 0.00186729  | 0.999677 |
| Benzene+cycloprop-2-enylidene | 0.000232448 | 0.999909 | 0.000232448 | 0.999909 |
| Indene+H                      | 8.98986e-05 | 0.999999 | 8.98986e-05 | 0.999999 |
| rad12                         | 7.12503e-07 | 1.00000  | 7.12503e-07 | 1.00000  |
| Benzene+cycloprop-1-enylidene | 1.70010e-07 | 1.00000  | 1.70010e-07 | 1.00000  |
| PhCHCCH2+H                    | 5.55716e-08 | 1.00000  | 5.55716e-08 | 1.00000  |
| rad11                         | 2.84567e-09 | 1.00000  | 2.84567e-09 | 1.00000  |
| rad2                          | 2.29613e-09 | 1.00000  | 2.29613e-09 | 1.00000  |
| rad18                         | 9.46266e-10 | 1.00000  | 9.46266e-10 | 1.00000  |
| rad26                         | 3.30593e-10 | 1.00000  | 3.30593e-10 | 1.00000  |
| rad7                          | 3.08715e-10 | 1.00000  | 3.08715e-10 | 1.00000  |
| rad1                          | 2.10298e-10 | 1.00000  | 2.10298e-10 | 1.00000  |
| rad6                          | 1.43760e-10 | 1.00000  | 1.43760e-10 | 1.00000  |
| rad22                         | 1.01422e-10 | 1.00000  | 1.01422e-10 | 1.00000  |
| rad20                         | 7.93491e-11 | 1.00000  | 7.93491e-11 | 1.00000  |
| rad21                         | 6.40873e-11 | 1.00000  | 6.40873e-11 | 1.00000  |
| rad67                         | 2.80268e-11 | 1.00000  | 2.80268e-11 | 1.00000  |
| PhcycC3H3_A+H                 | 2.65543e-11 | 1.00000  | 2.65543e-11 | 1.00000  |
| rad45                         | 2.27302e-11 | 1.00000  | 2.27302e-11 | 1.00000  |
| C2H2+PhCH2                    | 1.58434e-11 | 1.00000  | 1.58434e-11 | 1.00000  |
| rad35                         | 1.22361e-11 | 1.00000  | 1.22361e-11 | 1.00000  |
| rad10                         | 3.76387e-12 | 1.00000  | 3.76387e-12 | 1.00000  |
| rad36                         | 1.63946e-12 | 1.00000  | 1.63946e-12 | 1.00000  |
| rad5                          | 1.36623e-12 | 1.00000  | 1.36623e-12 | 1.00000  |
| rad3                          | 1.06587e-12 | 1.00000  | 1.06587e-12 | 1.00000  |
| rad23                         | 8.01867e-13 | 1.00000  | 8.01867e-13 | 1.00000  |
| rad4                          | 6.11297e-13 | 1.00000  | 6.11297e-13 | 1.00000  |
| Phenyl+cycC3H4                | 5.80617e-13 | 1.00000  | 0.00000     | 1.00000  |
| PhCCCH3+H                     | 4.37929e-13 | 1.00000  | 4.37929e-13 | 1.00000  |
| Ph+MeAc                       | 3.40261e-13 | 1.00000  | 3.40261e-13 | 1.00000  |
| PhcycC3H3_B+H                 | 3.35900e-13 | 1.00000  | 3.35900e-13 | 1.00000  |
| Ph+Allene                     | 1.33003e-13 | 1.00000  | 1.33003e-13 | 1.00000  |
| rad25                         | 8.37444e-14 | 1.00000  | 8.37444e-14 | 1.00000  |
| rad30                         | 5.17196e-14 | 1.00000  | 5.17196e-14 | 1.00000  |
| rad27                         | 3.80500e-14 | 1.00000  | 3.80500e-14 | 1.00000  |
| PhCCH+CH3                     | 2.90505e-14 | 1.00000  | 2.90505e-14 | 1.00000  |
| PhCH2CCH+H                    | 2.85523e-14 | 1.00000  | 2.85523e-14 | 1.00000  |
| rad24                         | 1.11615e-14 | 1.00000  | 1.11615e-14 | 1.00000  |
| rad13                         | 9.13841e-15 | 1.00000  | 9.13841e-15 | 1.00000  |
| rad37                         | 2.54877e-16 | 1.00000  | 2.54877e-16 | 1.00000  |
| rad60syn                      | 2.43221e-16 | 1.00000  | 2.43221e-16 | 1.00000  |
| rad8                          | 2.31544e-16 | 1.00000  | 2.31544e-16 | 1.00000  |
| rad14                         | 1.56125e-16 | 1.00000  | 1.56125e-16 | 1.00000  |
| PAH3+H                        | 1.30463e-16 | 1.00000  | 1.30463e-16 | 1.00000  |
| rad60anti                     | 1.20576e-16 | 1.00000  | 1.20576e-16 | 1.00000  |
| rad28                         | 1.10909e-16 | 1.00000  | 1.10909e-16 | 1.00000  |
| rad33                         | 4.32106e-17 | 1.00000  | 4.32106e-17 | 1.00000  |
| PAH7+H                        | 2.68710e-17 | 1.00000  | 2.68710e-17 | 1.00000  |
| rad59                         | 2.55205e-17 | 1.00000  | 2.55205e-17 | 1.00000  |
| rad38                         | 2.81558e-18 | 1.00000  | 2.81558e-18 | 1.00000  |
| PAH10+CH3                     | 1.03559e-18 | 1.00000  | 1.03559e-18 | 1.00000  |
| rad31                         | 1.50942e-19 | 1.00000  | 1.50942e-19 | 1.00000  |

|           |             |         |             |         |
|-----------|-------------|---------|-------------|---------|
| rad46     | 1.15381e-19 | 1.00000 | 1.15381e-19 | 1.00000 |
| rad43     | 5.21560e-20 | 1.00000 | 5.21560e-20 | 1.00000 |
| PAH9+H    | 4.04526e-20 | 1.00000 | 4.04526e-20 | 1.00000 |
| rad58     | 7.96354e-21 | 1.00000 | 7.96354e-21 | 1.00000 |
| rad70     | 6.27841e-21 | 1.00000 | 6.27841e-21 | 1.00000 |
| rad50     | 1.30975e-21 | 1.00000 | 1.30975e-21 | 1.00000 |
| rad39     | 4.21036e-22 | 1.00000 | 4.21036e-22 | 1.00000 |
| PAH1+H    | 3.58938e-22 | 1.00000 | 3.58938e-22 | 1.00000 |
| rad34     | 2.04379e-22 | 1.00000 | 2.04379e-22 | 1.00000 |
| rad62     | 1.61755e-22 | 1.00000 | 1.61755e-22 | 1.00000 |
| rad54     | 3.69712e-23 | 1.00000 | 3.69712e-23 | 1.00000 |
| rad41     | 2.23634e-23 | 1.00000 | 2.23634e-23 | 1.00000 |
| rad52     | 1.41145e-23 | 1.00000 | 1.41145e-23 | 1.00000 |
| rad51     | 6.91136e-24 | 1.00000 | 6.91136e-24 | 1.00000 |
| rad55     | 5.84642e-25 | 1.00000 | 5.84642e-25 | 1.00000 |
| rad42     | 2.25431e-25 | 1.00000 | 2.25431e-25 | 1.00000 |
| rad47     | 6.58818e-26 | 1.00000 | 6.58818e-26 | 1.00000 |
| rad19syn  | 5.57631e-26 | 1.00000 | 5.57631e-26 | 1.00000 |
| rad61     | 3.91443e-26 | 1.00000 | 3.91443e-26 | 1.00000 |
| rad68syn  | 2.27368e-27 | 1.00000 | 2.27368e-27 | 1.00000 |
| rad65     | 2.15618e-27 | 1.00000 | 2.15618e-27 | 1.00000 |
| rad68anti | 1.67888e-27 | 1.00000 | 1.67888e-27 | 1.00000 |
| rad53     | 3.61734e-28 | 1.00000 | 3.61734e-28 | 1.00000 |
| rad40syn  | 3.55468e-29 | 1.00000 | 3.55468e-29 | 1.00000 |
| rad40anti | 2.68755e-29 | 1.00000 | 2.68755e-29 | 1.00000 |
| PAH8+H    | 9.37323e-30 | 1.00000 | 9.37323e-30 | 1.00000 |
| rad56     | 5.75408e-30 | 1.00000 | 5.75408e-30 | 1.00000 |
| rad64     | 6.43467e-31 | 1.00000 | 6.43467e-31 | 1.00000 |
| rad73     | 9.72134e-32 | 1.00000 | 9.72134e-32 | 1.00000 |
| rad71     | 1.31352e-33 | 1.00000 | 1.31352e-33 | 1.00000 |

1000000.00 Pa, 240.000000 K

| Rate constant             | True (fraction)        | Effective (fraction)   |
|---------------------------|------------------------|------------------------|
| Total                     | 2.45462e-14 (1.00 )    | 2.45462e-14 (1.00 )    |
| Formation of rad19        | 2.45383e-14 (1.000 )   | 2.45383e-14 (1.000 )   |
| H-abstraction to cyc2enyl | 7.92234e-18 (0.000323) | 7.92234e-18 (0.000323) |
| H-abstraction to cyc1enyl | 7.97958e-21 (3.25e-07) | 7.97958e-21 (3.25e-07) |

| species                       | PYtrue      | Cumul    | PYeffective | Cumul    |
|-------------------------------|-------------|----------|-------------|----------|
| rad9                          | 0.954638    | 0.954638 | 0.954638    | 0.954638 |
| rad19anti                     | 0.0429493   | 0.997588 | 0.0429493   | 0.997588 |
| rad15                         | 0.00198380  | 0.999572 | 0.00198380  | 0.999572 |
| Benzene+cycloprop-2-enylidene | 0.000322752 | 0.999894 | 0.000322752 | 0.999894 |
| Indene+H                      | 0.000104756 | 0.999999 | 0.000104756 | 0.999999 |
| rad12                         | 6.91574e-07 | 1.000000 | 6.91574e-07 | 1.000000 |
| Benzene+cycloprop-1-enylidene | 3.25084e-07 | 1.000000 | 3.25084e-07 | 1.000000 |
| PhCHCCH2+H                    | 6.63281e-08 | 1.000000 | 6.63281e-08 | 1.000000 |
| rad11                         | 3.40238e-09 | 1.000000 | 3.40238e-09 | 1.000000 |
| rad2                          | 2.76593e-09 | 1.000000 | 2.76593e-09 | 1.000000 |
| rad18                         | 1.13815e-09 | 1.000000 | 1.13815e-09 | 1.000000 |
| rad26                         | 3.98306e-10 | 1.000000 | 3.98306e-10 | 1.000000 |
| rad7                          | 3.45439e-10 | 1.000000 | 3.45439e-10 | 1.000000 |
| rad1                          | 2.54164e-10 | 1.000000 | 2.54164e-10 | 1.000000 |
| rad6                          | 1.87614e-10 | 1.000000 | 1.87614e-10 | 1.000000 |
| rad22                         | 1.32546e-10 | 1.000000 | 1.32546e-10 | 1.000000 |
| rad20                         | 9.62121e-11 | 1.000000 | 9.62121e-11 | 1.000000 |
| rad21                         | 7.63987e-11 | 1.000000 | 7.63987e-11 | 1.000000 |
| PhcycC3H3_A+H                 | 3.81151e-11 | 1.000000 | 3.81151e-11 | 1.000000 |
| rad67                         | 3.70900e-11 | 1.000000 | 3.70900e-11 | 1.000000 |
| rad45                         | 2.97938e-11 | 1.000000 | 2.97938e-11 | 1.000000 |
| C2H2+PhCH2                    | 2.25465e-11 | 1.000000 | 2.25465e-11 | 1.000000 |
| rad35                         | 1.61131e-11 | 1.000000 | 1.61131e-11 | 1.000000 |
| rad10                         | 5.14108e-12 | 1.000000 | 5.14108e-12 | 1.000000 |
| rad36                         | 2.15053e-12 | 1.000000 | 2.15053e-12 | 1.000000 |
| rad5                          | 1.70419e-12 | 1.000000 | 1.70419e-12 | 1.000000 |
| rad3                          | 1.46454e-12 | 1.000000 | 1.46454e-12 | 1.000000 |
| rad23                         | 1.16788e-12 | 1.000000 | 1.16788e-12 | 1.000000 |
| Phenyl+cycC3H4                | 8.49043e-13 | 1.000000 | 0.000000    | 1.000000 |
| rad4                          | 8.40354e-13 | 1.000000 | 8.40354e-13 | 1.000000 |
| PhCCCH3+H                     | 6.36139e-13 | 1.000000 | 6.36139e-13 | 1.000000 |
| PhcycC3H3_B+H                 | 5.87063e-13 | 1.000000 | 5.87063e-13 | 1.000000 |
| Ph+MeAc                       | 5.08125e-13 | 1.000000 | 5.08125e-13 | 1.000000 |
| Ph+Allene                     | 1.95823e-13 | 1.000000 | 1.95823e-13 | 1.000000 |
| rad25                         | 1.11369e-13 | 1.000000 | 1.11369e-13 | 1.000000 |
| rad30                         | 7.40192e-14 | 1.000000 | 7.40192e-14 | 1.000000 |
| rad27                         | 5.07163e-14 | 1.000000 | 5.07163e-14 | 1.000000 |
| PhCCH+CH3                     | 4.65082e-14 | 1.000000 | 4.65082e-14 | 1.000000 |



|            |             |         |             |         |
|------------|-------------|---------|-------------|---------|
| PhCH2CCH+H | 4.35795e-14 | 1.00000 | 4.35795e-14 | 1.00000 |
| rad24      | 1.28254e-14 | 1.00000 | 1.28254e-14 | 1.00000 |
| rad13      | 1.23821e-14 | 1.00000 | 1.23821e-14 | 1.00000 |
| rad37      | 3.84864e-16 | 1.00000 | 3.84864e-16 | 1.00000 |
| rad60syn   | 3.68779e-16 | 1.00000 | 3.68779e-16 | 1.00000 |
| rad14      | 2.51063e-16 | 1.00000 | 2.51063e-16 | 1.00000 |
| PAH3+H     | 2.11736e-16 | 1.00000 | 2.11736e-16 | 1.00000 |
| rad60anti  | 1.83733e-16 | 1.00000 | 1.83733e-16 | 1.00000 |
| rad28      | 1.70060e-16 | 1.00000 | 1.70060e-16 | 1.00000 |
| rad8       | 1.33110e-16 | 1.00000 | 1.33110e-16 | 1.00000 |
| rad33      | 5.60430e-17 | 1.00000 | 5.60430e-17 | 1.00000 |
| PAH7+H     | 4.51438e-17 | 1.00000 | 4.51438e-17 | 1.00000 |
| rad59      | 4.09741e-17 | 1.00000 | 4.09741e-17 | 1.00000 |
| rad38      | 4.60217e-18 | 1.00000 | 4.60217e-18 | 1.00000 |
| PAH10+CH3  | 1.84135e-18 | 1.00000 | 1.84135e-18 | 1.00000 |
| rad46      | 1.93628e-19 | 1.00000 | 1.93628e-19 | 1.00000 |
| rad31      | 1.92520e-19 | 1.00000 | 1.92520e-19 | 1.00000 |
| rad43      | 1.01705e-19 | 1.00000 | 1.01705e-19 | 1.00000 |
| PAH9+H     | 7.57310e-20 | 1.00000 | 7.57310e-20 | 1.00000 |
| rad58      | 1.54831e-20 | 1.00000 | 1.54831e-20 | 1.00000 |
| rad70      | 1.28280e-20 | 1.00000 | 1.28280e-20 | 1.00000 |
| rad50      | 2.45166e-21 | 1.00000 | 2.45166e-21 | 1.00000 |
| rad39      | 8.44364e-22 | 1.00000 | 8.44364e-22 | 1.00000 |
| PAH1+H     | 7.43616e-22 | 1.00000 | 7.43616e-22 | 1.00000 |
| rad34      | 4.51801e-22 | 1.00000 | 4.51801e-22 | 1.00000 |
| rad62      | 3.96971e-22 | 1.00000 | 3.96971e-22 | 1.00000 |
| rad54      | 7.65111e-23 | 1.00000 | 7.65111e-23 | 1.00000 |
| rad41      | 5.38033e-23 | 1.00000 | 5.38033e-23 | 1.00000 |
| rad52      | 2.83223e-23 | 1.00000 | 2.83223e-23 | 1.00000 |
| rad51      | 1.48569e-23 | 1.00000 | 1.48569e-23 | 1.00000 |
| rad55      | 1.29838e-24 | 1.00000 | 1.29838e-24 | 1.00000 |
| rad42      | 6.53831e-25 | 1.00000 | 6.53831e-25 | 1.00000 |
| rad19syn   | 1.94769e-25 | 1.00000 | 1.94769e-25 | 1.00000 |
| rad61      | 1.16635e-25 | 1.00000 | 1.16635e-25 | 1.00000 |
| rad47      | 1.12401e-25 | 1.00000 | 1.12401e-25 | 1.00000 |
| rad68syn   | 7.67252e-27 | 1.00000 | 7.67252e-27 | 1.00000 |
| rad68anti  | 5.63603e-27 | 1.00000 | 5.63603e-27 | 1.00000 |
| rad65      | 5.54944e-27 | 1.00000 | 5.54944e-27 | 1.00000 |
| rad53      | 1.05056e-27 | 1.00000 | 1.05056e-27 | 1.00000 |
| rad40syn   | 1.43494e-28 | 1.00000 | 1.43494e-28 | 1.00000 |
| rad40anti  | 1.08704e-28 | 1.00000 | 1.08704e-28 | 1.00000 |
| PAH8+H     | 4.12945e-29 | 1.00000 | 4.12945e-29 | 1.00000 |
| rad56      | 2.03099e-29 | 1.00000 | 2.03099e-29 | 1.00000 |
| rad64      | 2.16576e-30 | 1.00000 | 2.16576e-30 | 1.00000 |
| rad73      | 4.03390e-31 | 1.00000 | 4.03390e-31 | 1.00000 |
| rad71      | 6.19462e-33 | 1.00000 | 6.19462e-33 | 1.00000 |

1000000.00 Pa, 250.000000 K

=====

| Rate constant             | True (fraction)        | Effective (fraction)   |
|---------------------------|------------------------|------------------------|
| Total                     | 2.71048e-14 (1.00 )    | 2.71048e-14 (1.00 )    |
| Formation of rad19        | 2.70930e-14 (1.000 )   | 2.70930e-14 (1.000 )   |
| H-abstraction to cyc2enyl | 1.17991e-17 (0.000435) | 1.17991e-17 (0.000435) |
| H-abstraction to cyc1enyl | 1.59554e-20 (5.89e-07) | 1.59554e-20 (5.89e-07) |

| species                       | PYtrue      | Cumul    | PYeffective | Cumul    |
|-------------------------------|-------------|----------|-------------|----------|
| rad9                          | 0.959002    | 0.959002 | 0.959002    | 0.959002 |
| rad19anti                     | 0.0383376   | 0.997339 | 0.0383376   | 0.997339 |
| rad15                         | 0.00210180  | 0.999441 | 0.00210180  | 0.999441 |
| Benzene+cycloprop-2-enylidene | 0.000435312 | 0.999876 | 0.000435312 | 0.999876 |
| Indene+H                      | 0.000121846 | 0.999998 | 0.000121846 | 0.999998 |
| rad12                         | 6.72346e-07 | 0.999999 | 6.72346e-07 | 0.999999 |
| Benzene+cycloprop-1-enylidene | 5.88656e-07 | 1.000000 | 5.88656e-07 | 1.000000 |
| PhCHCCH2+H                    | 7.93846e-08 | 1.000000 | 7.93846e-08 | 1.000000 |
| rad11                         | 4.07756e-09 | 1.000000 | 4.07756e-09 | 1.000000 |
| rad2                          | 3.34152e-09 | 1.000000 | 3.34152e-09 | 1.000000 |
| rad18                         | 1.36576e-09 | 1.000000 | 1.36576e-09 | 1.000000 |
| rad26                         | 4.81190e-10 | 1.000000 | 4.81190e-10 | 1.000000 |
| rad7                          | 3.87887e-10 | 1.000000 | 3.87887e-10 | 1.000000 |
| rad1                          | 3.08443e-10 | 1.000000 | 3.08443e-10 | 1.000000 |
| rad6                          | 2.46163e-10 | 1.000000 | 2.46163e-10 | 1.000000 |
| rad22                         | 1.73688e-10 | 1.000000 | 1.73688e-10 | 1.000000 |
| rad20                         | 1.16617e-10 | 1.000000 | 1.16617e-10 | 1.000000 |
| rad21                         | 9.12767e-11 | 1.000000 | 9.12767e-11 | 1.000000 |
| PhcycC3H3_A+H                 | 5.46926e-11 | 1.000000 | 5.46926e-11 | 1.000000 |
| rad67                         | 4.92489e-11 | 1.000000 | 4.92489e-11 | 1.000000 |
| rad45                         | 3.92018e-11 | 1.000000 | 3.92018e-11 | 1.000000 |
| C2H2+PhCH2                    | 3.21774e-11 | 1.000000 | 3.21774e-11 | 1.000000 |

|                |             |          |             |          |
|----------------|-------------|----------|-------------|----------|
| rad35          | 2.12870e-11 | 1.000000 | 2.12870e-11 | 1.000000 |
| rad10          | 7.06667e-12 | 1.000000 | 7.06667e-12 | 1.000000 |
| rad36          | 2.83408e-12 | 1.000000 | 2.83408e-12 | 1.000000 |
| rad5           | 2.15024e-12 | 1.000000 | 2.15024e-12 | 1.000000 |
| rad3           | 2.02390e-12 | 1.000000 | 2.02390e-12 | 1.000000 |
| rad23          | 1.71033e-12 | 1.000000 | 1.71033e-12 | 1.000000 |
| Phenyl+cycC3H4 | 1.23771e-12 | 1.000000 | 0.000000    | 1.000000 |
| rad4           | 1.16231e-12 | 1.000000 | 1.16231e-12 | 1.000000 |
| PhcycC3H3_B+H  | 1.01193e-12 | 1.000000 | 1.01193e-12 | 1.000000 |
| PhCCCH3+H      | 9.32611e-13 | 1.000000 | 9.32611e-13 | 1.000000 |
| Ph+MeAc        | 7.66545e-13 | 1.000000 | 7.66545e-13 | 1.000000 |
| Ph+Allene      | 2.90801e-13 | 1.000000 | 2.90801e-13 | 1.000000 |
| rad25          | 1.48319e-13 | 1.000000 | 1.48319e-13 | 1.000000 |
| rad30          | 1.06266e-13 | 1.000000 | 1.06266e-13 | 1.000000 |
| PhCCH+CH3      | 7.58421e-14 | 1.000000 | 7.58421e-14 | 1.000000 |
| rad27          | 6.76996e-14 | 1.000000 | 6.76996e-14 | 1.000000 |
| PhCH2CCH+H     | 6.71499e-14 | 1.000000 | 6.71499e-14 | 1.000000 |
| rad13          | 1.68409e-14 | 1.000000 | 1.68409e-14 | 1.000000 |
| rad24          | 1.48009e-14 | 1.000000 | 1.48009e-14 | 1.000000 |
| rad37          | 5.86578e-16 | 1.000000 | 5.86578e-16 | 1.000000 |
| rad60syn       | 5.61940e-16 | 1.000000 | 5.61940e-16 | 1.000000 |
| rad14          | 4.06451e-16 | 1.000000 | 4.06451e-16 | 1.000000 |
| PAH3+H         | 3.45799e-16 | 1.000000 | 3.45799e-16 | 1.000000 |
| rad60anti      | 2.81400e-16 | 1.000000 | 2.81400e-16 | 1.000000 |
| rad28          | 2.63576e-16 | 1.000000 | 2.63576e-16 | 1.000000 |
| rad8           | 7.89410e-17 | 1.000000 | 7.89410e-17 | 1.000000 |
| PAH7+H         | 7.64403e-17 | 1.000000 | 7.64403e-17 | 1.000000 |
| rad33          | 7.30393e-17 | 1.000000 | 7.30393e-17 | 1.000000 |
| rad59          | 6.61777e-17 | 1.000000 | 6.61777e-17 | 1.000000 |
| rad38          | 7.60236e-18 | 1.000000 | 7.60236e-18 | 1.000000 |
| PAH10+CH3      | 3.30653e-18 | 1.000000 | 3.30653e-18 | 1.000000 |
| rad46          | 3.28670e-19 | 1.000000 | 3.28670e-19 | 1.000000 |
| rad31          | 2.48465e-19 | 1.000000 | 2.48465e-19 | 1.000000 |
| rad43          | 1.99666e-19 | 1.000000 | 1.99666e-19 | 1.000000 |
| PAH9+H         | 1.43565e-19 | 1.000000 | 1.43565e-19 | 1.000000 |
| rad58          | 3.01651e-20 | 1.000000 | 3.01651e-20 | 1.000000 |
| rad70          | 2.62738e-20 | 1.000000 | 2.62738e-20 | 1.000000 |
| rad50          | 4.64655e-21 | 1.000000 | 4.64655e-21 | 1.000000 |
| rad39          | 1.71710e-21 | 1.000000 | 1.71710e-21 | 1.000000 |
| PAH1+H         | 1.54761e-21 | 1.000000 | 1.54761e-21 | 1.000000 |
| rad34          | 9.96076e-22 | 1.000000 | 9.96076e-22 | 1.000000 |
| rad62          | 9.75101e-22 | 1.000000 | 9.75101e-22 | 1.000000 |
| rad54          | 1.59769e-22 | 1.000000 | 1.59769e-22 | 1.000000 |
| rad41          | 1.28557e-22 | 1.000000 | 1.28557e-22 | 1.000000 |
| rad52          | 5.74601e-23 | 1.000000 | 5.74601e-23 | 1.000000 |
| rad51          | 3.21998e-23 | 1.000000 | 3.21998e-23 | 1.000000 |
| rad55          | 2.89601e-24 | 1.000000 | 2.89601e-24 | 1.000000 |
| rad42          | 1.86515e-24 | 1.000000 | 1.86515e-24 | 1.000000 |
| rad19syn       | 7.15505e-25 | 1.000000 | 7.15505e-25 | 1.000000 |
| rad61          | 3.33530e-25 | 1.000000 | 3.33530e-25 | 1.000000 |
| rad47          | 1.90871e-25 | 1.000000 | 1.90871e-25 | 1.000000 |
| rad68syn       | 2.44223e-26 | 1.000000 | 2.44223e-26 | 1.000000 |
| rad68anti      | 1.78618e-26 | 1.000000 | 1.78618e-26 | 1.000000 |
| rad65          | 1.42659e-26 | 1.000000 | 1.42659e-26 | 1.000000 |
| rad53          | 2.97104e-27 | 1.000000 | 2.97104e-27 | 1.000000 |
| rad40syn       | 5.31063e-28 | 1.000000 | 5.31063e-28 | 1.000000 |
| rad40anti      | 4.03382e-28 | 1.000000 | 4.03382e-28 | 1.000000 |
| PAH8+H         | 1.64000e-28 | 1.000000 | 1.64000e-28 | 1.000000 |
| rad56          | 6.74548e-29 | 1.000000 | 6.74548e-29 | 1.000000 |
| rad64          | 6.96962e-30 | 1.000000 | 6.96962e-30 | 1.000000 |
| rad73          | 1.53823e-30 | 1.000000 | 1.53823e-30 | 1.000000 |
| rad71          | 2.62137e-32 | 1.000000 | 2.62137e-32 | 1.000000 |

1000000.00 Pa, 260.000000 K

| Rate constant             | True (fraction)        | Effective (fraction)   |
|---------------------------|------------------------|------------------------|
| Total                     | 2.97464e-14 (1.00 )    | 2.97464e-14 (1.00 )    |
| Formation of rad19        | 2.97293e-14 (0.999 )   | 2.97293e-14 (0.999 )   |
| H-abstraction to cyc2enyl | 1.70236e-17 (0.000572) | 1.70236e-17 (0.000572) |
| H-abstraction to cyclenyl | 3.02186e-20 (1.02e-06) | 3.02186e-20 (1.02e-06) |

| species                       | PYtrue      | Cumul    | PYeffective | Cumul    |
|-------------------------------|-------------|----------|-------------|----------|
| rad9                          | 0.962697    | 0.962697 | 0.962697    | 0.962697 |
| rad19anti                     | 0.0343663   | 0.997063 | 0.0343663   | 0.997063 |
| rad15                         | 0.00222104  | 0.999284 | 0.00222104  | 0.999284 |
| Benzene+cycloprop-2-enylidene | 0.000572291 | 0.999856 | 0.000572291 | 0.999856 |
| Indene+H                      | 0.000141506 | 0.999998 | 0.000141506 | 0.999998 |
| Benzene+cycloprop-1-enylidene | 1.01588e-06 | 0.999999 | 1.01588e-06 | 0.999999 |

|                |             |          |             |          |
|----------------|-------------|----------|-------------|----------|
| rad12          | 6.54683e-07 | 1.000000 | 6.54683e-07 | 1.000000 |
| PhCHCCH2+H     | 9.52955e-08 | 1.000000 | 9.52955e-08 | 1.000000 |
| rad11          | 4.89889e-09 | 1.000000 | 4.89889e-09 | 1.000000 |
| rad2           | 4.04939e-09 | 1.000000 | 4.04939e-09 | 1.000000 |
| rad18          | 1.63492e-09 | 1.000000 | 1.63492e-09 | 1.000000 |
| rad26          | 5.83032e-10 | 1.000000 | 5.83032e-10 | 1.000000 |
| rad7           | 4.36926e-10 | 1.000000 | 4.36926e-10 | 1.000000 |
| rad1           | 3.75947e-10 | 1.000000 | 3.75947e-10 | 1.000000 |
| rad6           | 3.24738e-10 | 1.000000 | 3.24738e-10 | 1.000000 |
| rad22          | 2.28185e-10 | 1.000000 | 2.28185e-10 | 1.000000 |
| rad20          | 1.41278e-10 | 1.000000 | 1.41278e-10 | 1.000000 |
| rad21          | 1.09250e-10 | 1.000000 | 1.09250e-10 | 1.000000 |
| PhcycC3H3_A+H  | 7.84166e-11 | 1.000000 | 7.84166e-11 | 1.000000 |
| rad67          | 6.56174e-11 | 1.000000 | 6.56174e-11 | 1.000000 |
| rad45          | 5.17766e-11 | 1.000000 | 5.17766e-11 | 1.000000 |
| C2H2+PhCH2     | 4.60443e-11 | 1.000000 | 4.60443e-11 | 1.000000 |
| rad35          | 2.82153e-11 | 1.000000 | 2.82153e-11 | 1.000000 |
| rad10          | 9.77731e-12 | 1.000000 | 9.77731e-12 | 1.000000 |
| rad36          | 3.75226e-12 | 1.000000 | 3.75226e-12 | 1.000000 |
| rad3           | 2.81298e-12 | 1.000000 | 2.81298e-12 | 1.000000 |
| rad5           | 2.74309e-12 | 1.000000 | 2.74309e-12 | 1.000000 |
| rad23          | 2.51847e-12 | 1.000000 | 2.51847e-12 | 1.000000 |
| Phenyl+cycC3H4 | 1.79786e-12 | 1.000000 | 0.00000     | 1.000000 |
| PhcycC3H3_B+H  | 1.72173e-12 | 1.000000 | 1.72173e-12 | 1.000000 |
| rad4           | 1.61747e-12 | 1.000000 | 1.61747e-12 | 1.000000 |
| PhCCCH3+H      | 1.37995e-12 | 1.000000 | 1.37995e-12 | 1.000000 |
| Ph+MeAc        | 1.16802e-12 | 1.000000 | 1.16802e-12 | 1.000000 |
| Ph+Allene      | 4.35461e-13 | 1.000000 | 4.35461e-13 | 1.000000 |
| rad25          | 1.97743e-13 | 1.000000 | 1.97743e-13 | 1.000000 |
| rad30          | 1.53017e-13 | 1.000000 | 1.53017e-13 | 1.000000 |
| PhCCH+CH3      | 1.25754e-13 | 1.000000 | 1.25754e-13 | 1.000000 |
| PhCH2CCH+H     | 1.04400e-13 | 1.000000 | 1.04400e-13 | 1.000000 |
| rad27          | 9.04750e-14 | 1.000000 | 9.04750e-14 | 1.000000 |
| rad13          | 2.29915e-14 | 1.000000 | 2.29915e-14 | 1.000000 |
| rad24          | 1.71461e-14 | 1.000000 | 1.71461e-14 | 1.000000 |
| rad37          | 9.02117e-16 | 1.000000 | 9.02117e-16 | 1.000000 |
| rad60syn       | 8.60138e-16 | 1.000000 | 8.60138e-16 | 1.000000 |
| rad14          | 6.61744e-16 | 1.000000 | 6.61744e-16 | 1.000000 |
| PAH3+H         | 5.67723e-16 | 1.000000 | 5.67723e-16 | 1.000000 |
| rad60anti      | 4.32965e-16 | 1.000000 | 4.32965e-16 | 1.000000 |
| rad28          | 4.12815e-16 | 1.000000 | 4.12815e-16 | 1.000000 |
| PAH7+H         | 1.30273e-16 | 1.000000 | 1.30273e-16 | 1.000000 |
| rad59          | 1.07423e-16 | 1.000000 | 1.07423e-16 | 1.000000 |
| rad33          | 9.56595e-17 | 1.000000 | 9.56595e-17 | 1.000000 |
| rad8           | 4.82485e-17 | 1.000000 | 4.82485e-17 | 1.000000 |
| rad38          | 1.26824e-17 | 1.000000 | 1.26824e-17 | 1.000000 |
| PAH10+CH3      | 5.98446e-18 | 1.000000 | 5.98446e-18 | 1.000000 |
| rad46          | 5.63863e-19 | 1.000000 | 5.63863e-19 | 1.000000 |
| rad43          | 3.93539e-19 | 1.000000 | 3.93539e-19 | 1.000000 |
| rad31          | 3.24739e-19 | 1.000000 | 3.24739e-19 | 1.000000 |
| PAH9+H         | 2.75057e-19 | 1.000000 | 2.75057e-19 | 1.000000 |
| rad58          | 5.87341e-20 | 1.000000 | 5.87341e-20 | 1.000000 |
| rad70          | 5.37577e-20 | 1.000000 | 5.37577e-20 | 1.000000 |
| rad50          | 8.89699e-21 | 1.000000 | 8.89699e-21 | 1.000000 |
| rad39          | 3.52704e-21 | 1.000000 | 3.52704e-21 | 1.000000 |
| PAH1+H         | 3.22368e-21 | 1.000000 | 3.22368e-21 | 1.000000 |
| rad62          | 2.38191e-21 | 1.000000 | 2.38191e-21 | 1.000000 |
| rad34          | 2.18097e-21 | 1.000000 | 2.18097e-21 | 1.000000 |
| rad54          | 3.35164e-22 | 1.000000 | 3.35164e-22 | 1.000000 |
| rad41          | 3.03632e-22 | 1.000000 | 3.03632e-22 | 1.000000 |
| rad52          | 1.17475e-22 | 1.000000 | 1.17475e-22 | 1.000000 |
| rad51          | 7.00531e-23 | 1.000000 | 7.00531e-23 | 1.000000 |
| rad55          | 6.45263e-24 | 1.000000 | 6.45263e-24 | 1.000000 |
| rad42          | 5.19428e-24 | 1.000000 | 5.19428e-24 | 1.000000 |
| rad19syn       | 2.75469e-24 | 1.000000 | 2.75469e-24 | 1.000000 |
| rad61          | 9.12930e-25 | 1.000000 | 9.12930e-25 | 1.000000 |
| rad47          | 3.23149e-25 | 1.000000 | 3.23149e-25 | 1.000000 |
| rad68syn       | 7.32381e-26 | 1.000000 | 7.32381e-26 | 1.000000 |
| rad68anti      | 5.33706e-26 | 1.000000 | 5.33706e-26 | 1.000000 |
| rad65          | 3.63347e-26 | 1.000000 | 3.63347e-26 | 1.000000 |
| rad53          | 8.13154e-27 | 1.000000 | 8.13154e-27 | 1.000000 |
| rad40syn       | 1.80821e-27 | 1.000000 | 1.80821e-27 | 1.000000 |
| rad40anti      | 1.37791e-27 | 1.000000 | 1.37791e-27 | 1.000000 |
| PAH8+H         | 5.91153e-28 | 1.000000 | 5.91153e-28 | 1.000000 |
| rad56          | 2.10410e-28 | 1.000000 | 2.10410e-28 | 1.000000 |
| rad64          | 2.13162e-29 | 1.000000 | 2.13162e-29 | 1.000000 |
| rad73          | 5.40586e-30 | 1.000000 | 5.40586e-30 | 1.000000 |
| rad71          | 1.00325e-31 | 1.000000 | 1.00325e-31 | 1.000000 |

1000000.00 Pa, 270.000000 K

=====

| Rate constant             | True (fraction)        | Effective (fraction)   |
|---------------------------|------------------------|------------------------|
| Total                     | 3.24655e-14 (1.00 )    | 3.24655e-14 (1.00 )    |
| Formation of rad19        | 3.24415e-14 (0.999 )   | 3.24415e-14 (0.999 )   |
| H-abstraction to cyc2enyl | 2.38790e-17 (0.000736) | 2.38790e-17 (0.000736) |
| H-abstraction to cyclenyl | 5.45397e-20 (1.68e-06) | 5.45397e-20 (1.68e-06) |

| species                       | PYtrue      | Cumul    | PYeffective | Cumul    |
|-------------------------------|-------------|----------|-------------|----------|
| rad9                          | 0.965798    | 0.965798 | 0.965798    | 0.965798 |
| rad19anti                     | 0.0309581   | 0.996757 | 0.0309581   | 0.996757 |
| rad15                         | 0.00234115  | 0.999098 | 0.00234115  | 0.999098 |
| Benzene+cycloprop-2-enylidene | 0.000735519 | 0.999833 | 0.000735519 | 0.999833 |
| Indene+H                      | 0.000164125 | 0.999997 | 0.000164125 | 0.999997 |
| Benzene+cycloprop-1-enylidene | 1.67993e-06 | 0.999999 | 1.67993e-06 | 0.999999 |
| rad12                         | 6.38473e-07 | 1.000000 | 6.38473e-07 | 1.000000 |
| PhCHCCH2+H                    | 1.14758e-07 | 1.000000 | 1.14758e-07 | 1.000000 |
| rad11                         | 5.90062e-09 | 1.000000 | 5.90062e-09 | 1.000000 |
| rad2                          | 4.92297e-09 | 1.000000 | 4.92297e-09 | 1.000000 |
| rad18                         | 1.95203e-09 | 1.000000 | 1.95203e-09 | 1.000000 |
| rad26                         | 7.08623e-10 | 1.000000 | 7.08623e-10 | 1.000000 |
| rad7                          | 4.93537e-10 | 1.000000 | 4.93537e-10 | 1.000000 |
| rad1                          | 4.60302e-10 | 1.000000 | 4.60302e-10 | 1.000000 |
| rad6                          | 4.30708e-10 | 1.000000 | 4.30708e-10 | 1.000000 |
| rad22                         | 3.00472e-10 | 1.000000 | 3.00472e-10 | 1.000000 |
| rad20                         | 1.71024e-10 | 1.000000 | 1.71024e-10 | 1.000000 |
| rad21                         | 1.30937e-10 | 1.000000 | 1.30937e-10 | 1.000000 |
| PhcycC3H3_A+H                 | 1.12280e-10 | 1.000000 | 1.12280e-10 | 1.000000 |
| rad67                         | 8.77195e-11 | 1.000000 | 8.77195e-11 | 1.000000 |
| rad45                         | 6.86328e-11 | 1.000000 | 6.86328e-11 | 1.000000 |
| C2H2+PhCH2                    | 6.60383e-11 | 1.000000 | 6.60383e-11 | 1.000000 |
| rad35                         | 3.75210e-11 | 1.000000 | 3.75210e-11 | 1.000000 |
| rad10                         | 1.36176e-11 | 1.000000 | 1.36176e-11 | 1.000000 |
| rad36                         | 4.99021e-12 | 1.000000 | 4.99021e-12 | 1.000000 |
| rad3                          | 3.93129e-12 | 1.000000 | 3.93129e-12 | 1.000000 |
| rad23                         | 3.72772e-12 | 1.000000 | 3.72772e-12 | 1.000000 |
| rad5                          | 3.53591e-12 | 1.000000 | 3.53591e-12 | 1.000000 |
| PhcycC3H3_B+H                 | 2.89257e-12 | 1.000000 | 2.89257e-12 | 1.000000 |
| Phenyl+cycC3H4                | 2.60088e-12 | 1.000000 | 0.00000     | 1.000000 |
| rad4                          | 2.26424e-12 | 1.000000 | 2.26424e-12 | 1.000000 |
| PhCCCH3+H                     | 2.06027e-12 | 1.000000 | 2.06027e-12 | 1.000000 |
| Ph+MeAc                       | 1.79678e-12 | 1.000000 | 1.79678e-12 | 1.000000 |
| Ph+Allene                     | 6.57158e-13 | 1.000000 | 6.57158e-13 | 1.000000 |
| rad25                         | 2.63797e-13 | 1.000000 | 2.63797e-13 | 1.000000 |
| rad30                         | 2.20920e-13 | 1.000000 | 2.20920e-13 | 1.000000 |
| PhCCH+CH3                     | 2.11502e-13 | 1.000000 | 2.11502e-13 | 1.000000 |
| PhCH2CCH+H                    | 1.63617e-13 | 1.000000 | 1.63617e-13 | 1.000000 |
| rad27                         | 1.21000e-13 | 1.000000 | 1.21000e-13 | 1.000000 |
| rad13                         | 3.15032e-14 | 1.000000 | 3.15032e-14 | 1.000000 |
| rad24                         | 1.99275e-14 | 1.000000 | 1.99275e-14 | 1.000000 |
| rad37                         | 1.39901e-15 | 1.000000 | 1.39901e-15 | 1.000000 |
| rad60syn                      | 1.32150e-15 | 1.000000 | 1.32150e-15 | 1.000000 |
| rad14                         | 1.08189e-15 | 1.000000 | 1.08189e-15 | 1.000000 |
| PAH3+H                        | 9.35627e-16 | 1.000000 | 9.35627e-16 | 1.000000 |
| rad60anti                     | 6.68679e-16 | 1.000000 | 6.68679e-16 | 1.000000 |
| rad28                         | 6.52872e-16 | 1.000000 | 6.52872e-16 | 1.000000 |
| PAH7+H                        | 2.23028e-16 | 1.000000 | 2.23028e-16 | 1.000000 |
| rad59                         | 1.75021e-16 | 1.000000 | 1.75021e-16 | 1.000000 |
| rad33                         | 1.25899e-16 | 1.000000 | 1.25899e-16 | 1.000000 |
| rad8                          | 3.03708e-17 | 1.000000 | 3.03708e-17 | 1.000000 |
| rad38                         | 2.13364e-17 | 1.000000 | 2.13364e-17 | 1.000000 |
| PAH10+CH3                     | 1.08853e-17 | 1.000000 | 1.08853e-17 | 1.000000 |
| rad46                         | 9.76263e-19 | 1.000000 | 9.76263e-19 | 1.000000 |
| rad43                         | 7.75898e-19 | 1.000000 | 7.75898e-19 | 1.000000 |
| PAH9+H                        | 5.30886e-19 | 1.000000 | 5.30886e-19 | 1.000000 |
| rad31                         | 4.30170e-19 | 1.000000 | 4.30170e-19 | 1.000000 |
| rad58                         | 1.13900e-19 | 1.000000 | 1.13900e-19 | 1.000000 |
| rad70                         | 1.09400e-19 | 1.000000 | 1.09400e-19 | 1.000000 |
| rad50                         | 1.71532e-20 | 1.000000 | 1.71532e-20 | 1.000000 |
| rad39                         | 7.27750e-21 | 1.000000 | 7.27750e-21 | 1.000000 |
| PAH1+H                        | 6.68796e-21 | 1.000000 | 6.68796e-21 | 1.000000 |
| rad62                         | 5.74476e-21 | 1.000000 | 5.74476e-21 | 1.000000 |
| rad34                         | 4.71875e-21 | 1.000000 | 4.71875e-21 | 1.000000 |
| rad41                         | 7.04969e-22 | 1.000000 | 7.04969e-22 | 1.000000 |
| rad54                         | 7.02361e-22 | 1.000000 | 7.02361e-22 | 1.000000 |
| rad52                         | 2.40925e-22 | 1.000000 | 2.40925e-22 | 1.000000 |
| rad51                         | 1.52126e-22 | 1.000000 | 1.52126e-22 | 1.000000 |
| rad55                         | 1.42689e-23 | 1.000000 | 1.42689e-23 | 1.000000 |
| rad42                         | 1.40223e-23 | 1.000000 | 1.40223e-23 | 1.000000 |

|           |             |          |             |          |
|-----------|-------------|----------|-------------|----------|
| rad19syn  | 1.10704e-23 | 1.000000 | 1.10704e-23 | 1.000000 |
| rad61     | 2.38504e-24 | 1.000000 | 2.38504e-24 | 1.000000 |
| rad47     | 5.46365e-25 | 1.000000 | 5.46365e-25 | 1.000000 |
| rad68syn  | 2.06699e-25 | 1.000000 | 2.06699e-25 | 1.000000 |
| rad68anti | 1.50179e-25 | 1.000000 | 1.50179e-25 | 1.000000 |
| rad65     | 9.09091e-26 | 1.000000 | 9.09091e-26 | 1.000000 |
| rad53     | 2.14127e-26 | 1.000000 | 2.14127e-26 | 1.000000 |
| rad40syn  | 5.68350e-27 | 1.000000 | 5.68350e-27 | 1.000000 |
| rad40anti | 4.34690e-27 | 1.000000 | 4.34690e-27 | 1.000000 |
| PAH8+H    | 1.94590e-27 | 1.000000 | 1.94590e-27 | 1.000000 |
| rad56     | 6.15697e-28 | 1.000000 | 6.15697e-28 | 1.000000 |
| rad64     | 6.16843e-29 | 1.000000 | 6.16843e-29 | 1.000000 |
| rad73     | 1.75615e-29 | 1.000000 | 1.75615e-29 | 1.000000 |
| rad71     | 3.49706e-31 | 1.000000 | 3.49706e-31 | 1.000000 |

1000000.00 Pa, 280.000000 K

| Rate constant             | True (fraction)        | Effective (fraction)   |
|---------------------------|------------------------|------------------------|
| Total                     | 3.52572e-14 (1.00 )    | 3.52572e-14 (1.00 )    |
| Formation of rad19        | 3.52244e-14 (0.999 )   | 3.52244e-14 (0.999 )   |
| H-abstraction to cyc2enyl | 3.26639e-17 (0.000926) | 3.26639e-17 (0.000926) |
| H-abstraction to cyclenyl | 9.42926e-20 (2.67e-06) | 9.42926e-20 (2.67e-06) |

| species                       | PYtrue      | Cumul    | PYeffective | Cumul    |
|-------------------------------|-------------|----------|-------------|----------|
| rad9                          | 0.968373    | 0.968373 | 0.968373    | 0.968373 |
| rad19anti                     | 0.0280443   | 0.996418 | 0.0280443   | 0.996418 |
| rad15                         | 0.00246178  | 0.998880 | 0.00246178  | 0.998880 |
| Benzene+cycloprop-2-enylidene | 0.000926445 | 0.999806 | 0.000926445 | 0.999806 |
| Indene+H                      | 0.000190148 | 0.999996 | 0.000190148 | 0.999996 |
| Benzene+cycloprop-1-enylidene | 2.67442e-06 | 0.999999 | 2.67442e-06 | 0.999999 |
| rad12                         | 6.23620e-07 | 0.999999 | 6.23620e-07 | 0.999999 |
| PhCHCCH2+H                    | 1.38650e-07 | 1.000000 | 1.38650e-07 | 1.000000 |
| rad11                         | 7.12512e-09 | 1.000000 | 7.12512e-09 | 1.000000 |
| rad2                          | 6.00451e-09 | 1.000000 | 6.00451e-09 | 1.000000 |
| rad18                         | 2.32396e-09 | 1.000000 | 2.32396e-09 | 1.000000 |
| rad26                         | 8.64031e-10 | 1.000000 | 8.64031e-10 | 1.000000 |
| rad6                          | 5.74248e-10 | 1.000000 | 5.74248e-10 | 1.000000 |
| rad1                          | 5.66197e-10 | 1.000000 | 5.66197e-10 | 1.000000 |
| rad7                          | 5.58804e-10 | 1.000000 | 5.58804e-10 | 1.000000 |
| rad22                         | 3.96413e-10 | 1.000000 | 3.96413e-10 | 1.000000 |
| rad20                         | 2.06808e-10 | 1.000000 | 2.06808e-10 | 1.000000 |
| PhcycC3H3_A+H                 | 1.60447e-10 | 1.000000 | 1.60447e-10 | 1.000000 |
| rad21                         | 1.57052e-10 | 1.000000 | 1.57052e-10 | 1.000000 |
| rad67                         | 1.17636e-10 | 1.000000 | 1.17636e-10 | 1.000000 |
| C2H2+PhCH2                    | 9.48750e-11 | 1.000000 | 9.48750e-11 | 1.000000 |
| rad45                         | 9.12766e-11 | 1.000000 | 9.12766e-11 | 1.000000 |
| rad35                         | 5.00505e-11 | 1.000000 | 5.00505e-11 | 1.000000 |
| rad10                         | 1.90888e-11 | 1.000000 | 1.90888e-11 | 1.000000 |
| rad36                         | 6.66431e-12 | 1.000000 | 6.66431e-12 | 1.000000 |
| rad23                         | 5.54280e-12 | 1.000000 | 5.54280e-12 | 1.000000 |
| rad3                          | 5.52184e-12 | 1.000000 | 5.52184e-12 | 1.000000 |
| PhcycC3H3_B+H                 | 4.79749e-12 | 1.000000 | 4.79749e-12 | 1.000000 |
| rad5                          | 4.60170e-12 | 1.000000 | 4.60170e-12 | 1.000000 |
| Phenyl+cycC3H4                | 3.74512e-12 | 1.000000 | 0.000000    | 1.000000 |
| rad4                          | 3.18695e-12 | 1.000000 | 3.18695e-12 | 1.000000 |
| PhCCCH3+H                     | 3.10160e-12 | 1.000000 | 3.10160e-12 | 1.000000 |
| Ph+MeAc                       | 2.78747e-12 | 1.000000 | 2.78747e-12 | 1.000000 |
| Ph+Allene                     | 9.98389e-13 | 1.000000 | 9.98389e-13 | 1.000000 |
| PhCCH+CH3                     | 3.59645e-13 | 1.000000 | 3.59645e-13 | 1.000000 |
| rad25                         | 3.51924e-13 | 1.000000 | 3.51924e-13 | 1.000000 |
| rad30                         | 3.19607e-13 | 1.000000 | 3.19607e-13 | 1.000000 |
| PhCH2CCH+H                    | 2.58085e-13 | 1.000000 | 2.58085e-13 | 1.000000 |
| rad27                         | 1.61849e-13 | 1.000000 | 1.61849e-13 | 1.000000 |
| rad13                         | 4.33108e-14 | 1.000000 | 4.33108e-14 | 1.000000 |
| rad24                         | 2.32209e-14 | 1.000000 | 2.32209e-14 | 1.000000 |
| rad37                         | 2.18496e-15 | 1.000000 | 2.18496e-15 | 1.000000 |
| rad60syn                      | 2.03556e-15 | 1.000000 | 2.03556e-15 | 1.000000 |
| rad14                         | 1.77261e-15 | 1.000000 | 1.77261e-15 | 1.000000 |
| PAH3+H                        | 1.54466e-15 | 1.000000 | 1.54466e-15 | 1.000000 |
| rad28                         | 1.04111e-15 | 1.000000 | 1.04111e-15 | 1.000000 |
| rad60anti                     | 1.03536e-15 | 1.000000 | 1.03536e-15 | 1.000000 |
| PAH7+H                        | 3.82543e-16 | 1.000000 | 3.82543e-16 | 1.000000 |
| rad59                         | 2.85676e-16 | 1.000000 | 2.85676e-16 | 1.000000 |
| rad33                         | 1.66484e-16 | 1.000000 | 1.66484e-16 | 1.000000 |
| rad38                         | 3.61189e-17 | 1.000000 | 3.61189e-17 | 1.000000 |
| PAH10+CH3                     | 1.98198e-17 | 1.000000 | 1.98198e-17 | 1.000000 |
| rad8                          | 1.96820e-17 | 1.000000 | 1.96820e-17 | 1.000000 |
| rad46                         | 1.70173e-18 | 1.000000 | 1.70173e-18 | 1.000000 |

|           |             |          |             |          |
|-----------|-------------|----------|-------------|----------|
| rad43     | 1.52320e-18 | 1.000000 | 1.52320e-18 | 1.000000 |
| PAH9+H    | 1.02757e-18 | 1.000000 | 1.02757e-18 | 1.000000 |
| rad31     | 5.78004e-19 | 1.000000 | 5.78004e-19 | 1.000000 |
| rad70     | 2.20312e-19 | 1.000000 | 2.20312e-19 | 1.000000 |
| rad58     | 2.19075e-19 | 1.000000 | 2.19075e-19 | 1.000000 |
| rad50     | 3.31485e-20 | 1.000000 | 3.31485e-20 | 1.000000 |
| rad39     | 1.49810e-20 | 1.000000 | 1.49810e-20 | 1.000000 |
| PAH1+H    | 1.37384e-20 | 1.000000 | 1.37384e-20 | 1.000000 |
| rad62     | 1.35811e-20 | 1.000000 | 1.35811e-20 | 1.000000 |
| rad34     | 1.00323e-20 | 1.000000 | 1.00323e-20 | 1.000000 |
| rad41     | 1.59974e-21 | 1.000000 | 1.59974e-21 | 1.000000 |
| rad54     | 1.46058e-21 | 1.000000 | 1.46058e-21 | 1.000000 |
| rad52     | 4.92843e-22 | 1.000000 | 4.92843e-22 | 1.000000 |
| rad51     | 3.27597e-22 | 1.000000 | 3.27597e-22 | 1.000000 |
| rad19syn  | 4.62335e-23 | 1.000000 | 4.62335e-23 | 1.000000 |
| rad42     | 3.64688e-23 | 1.000000 | 3.64688e-23 | 1.000000 |
| rad55     | 3.10946e-23 | 1.000000 | 3.10946e-23 | 1.000000 |
| rad61     | 5.93174e-24 | 1.000000 | 5.93174e-24 | 1.000000 |
| rad47     | 9.23926e-25 | 1.000000 | 9.23926e-25 | 1.000000 |
| rad68syn  | 5.48713e-25 | 1.000000 | 5.48713e-25 | 1.000000 |
| rad68anti | 3.97706e-25 | 1.000000 | 3.97706e-25 | 1.000000 |
| rad65     | 2.21642e-25 | 1.000000 | 2.21642e-25 | 1.000000 |
| rad53     | 5.39843e-26 | 1.000000 | 5.39843e-26 | 1.000000 |
| rad40syn  | 1.65460e-26 | 1.000000 | 1.65460e-26 | 1.000000 |
| rad40anti | 1.27060e-26 | 1.000000 | 1.27060e-26 | 1.000000 |
| PAH8+H    | 5.88187e-27 | 1.000000 | 5.88187e-27 | 1.000000 |
| rad56     | 1.68952e-27 | 1.000000 | 1.68952e-27 | 1.000000 |
| rad64     | 1.68411e-28 | 1.000000 | 1.68411e-28 | 1.000000 |
| rad73     | 5.28984e-29 | 1.000000 | 5.28984e-29 | 1.000000 |
| rad71     | 1.11705e-30 | 1.000000 | 1.11705e-30 | 1.000000 |

1000000.00 Pa, 290.000000 K

| Rate constant             | True (fraction)        | Effective (fraction)   |
|---------------------------|------------------------|------------------------|
| Total                     | 3.81171e-14 (1.00 )    | 3.81171e-14 (1.00 )    |
| Formation of rad19        | 3.80733e-14 (0.999 )   | 3.80733e-14 (0.999 )   |
| H-abstraction to cyc2enyl | 4.36868e-17 (0.00115 ) | 4.36868e-17 (0.00115 ) |
| H-abstraction to cyc1enyl | 1.56861e-19 (4.12e-06) | 1.56861e-19 (4.12e-06) |

| species                       | PYtrue      | Cumul    | PYeffective | Cumul    |
|-------------------------------|-------------|----------|-------------|----------|
| rad9                          | 0.970482    | 0.970482 | 0.970482    | 0.970482 |
| rad19anti                     | 0.0255642   | 0.996047 | 0.0255642   | 0.996047 |
| rad15                         | 0.00258246  | 0.998629 | 0.00258246  | 0.998629 |
| Benzene+cycloprop-2-enylidene | 0.00114612  | 0.999775 | 0.00114612  | 0.999775 |
| Indene+H                      | 0.000220082 | 0.999995 | 0.000220082 | 0.999995 |
| Benzene+cycloprop-1-enylidene | 4.11523e-06 | 0.999999 | 4.11523e-06 | 0.999999 |
| rad12                         | 6.10044e-07 | 1.000000 | 6.10044e-07 | 1.000000 |
| PhCHCCH2+H                    | 1.68072e-07 | 1.000000 | 1.68072e-07 | 1.000000 |
| rad11                         | 8.62455e-09 | 1.000000 | 8.62455e-09 | 1.000000 |
| rad2                          | 7.34713e-09 | 1.000000 | 7.34713e-09 | 1.000000 |
| rad18                         | 2.75793e-09 | 1.000000 | 2.75793e-09 | 1.000000 |
| rad26                         | 1.05690e-09 | 1.000000 | 1.05690e-09 | 1.000000 |
| rad6                          | 7.69332e-10 | 1.000000 | 7.69332e-10 | 1.000000 |
| rad1                          | 6.99680e-10 | 1.000000 | 6.99680e-10 | 1.000000 |
| rad7                          | 6.33927e-10 | 1.000000 | 6.33927e-10 | 1.000000 |
| rad22                         | 5.23683e-10 | 1.000000 | 5.23683e-10 | 1.000000 |
| rad20                         | 2.49705e-10 | 1.000000 | 2.49705e-10 | 1.000000 |
| PhcycC3H3_A+H                 | 2.28624e-10 | 1.000000 | 2.28624e-10 | 1.000000 |
| rad21                         | 1.88405e-10 | 1.000000 | 1.88405e-10 | 1.000000 |
| rad67                         | 1.58184e-10 | 1.000000 | 1.58184e-10 | 1.000000 |
| C2H2+PhCH2                    | 1.36413e-10 | 1.000000 | 1.36413e-10 | 1.000000 |
| rad45                         | 1.21727e-10 | 1.000000 | 1.21727e-10 | 1.000000 |
| rad35                         | 6.69451e-11 | 1.000000 | 6.69451e-11 | 1.000000 |
| rad10                         | 2.69170e-11 | 1.000000 | 2.69170e-11 | 1.000000 |
| rad36                         | 8.93252e-12 | 1.000000 | 8.93252e-12 | 1.000000 |
| rad23                         | 8.27035e-12 | 1.000000 | 8.27035e-12 | 1.000000 |
| PhcycC3H3_B+H                 | 7.84870e-12 | 1.000000 | 7.84870e-12 | 1.000000 |
| rad3                          | 7.78827e-12 | 1.000000 | 7.78827e-12 | 1.000000 |
| rad5                          | 6.03976e-12 | 1.000000 | 6.03976e-12 | 1.000000 |
| Phenyl+cycC3H4                | 5.36400e-12 | 1.000000 | 0.000000    | 1.000000 |
| PhCCCH3+H                     | 4.70176e-12 | 1.000000 | 4.70176e-12 | 1.000000 |
| rad4                          | 4.50643e-12 | 1.000000 | 4.50643e-12 | 1.000000 |
| Ph+MeAc                       | 4.35327e-12 | 1.000000 | 4.35327e-12 | 1.000000 |
| Ph+Allene                     | 1.52439e-12 | 1.000000 | 1.52439e-12 | 1.000000 |
| PhCCH+CH3                     | 6.15716e-13 | 1.000000 | 6.15716e-13 | 1.000000 |
| rad25                         | 4.69157e-13 | 1.000000 | 4.69157e-13 | 1.000000 |
| rad30                         | 4.62897e-13 | 1.000000 | 4.62897e-13 | 1.000000 |
| PhCH2CCH+H                    | 4.08771e-13 | 1.000000 | 4.08771e-13 | 1.000000 |

|           |             |         |             |         |
|-----------|-------------|---------|-------------|---------|
| rad27     | 2.16380e-13 | 1.00000 | 2.16380e-13 | 1.00000 |
| rad13     | 5.97114e-14 | 1.00000 | 5.97114e-14 | 1.00000 |
| rad24     | 2.71115e-14 | 1.00000 | 2.71115e-14 | 1.00000 |
| rad37     | 3.42955e-15 | 1.00000 | 3.42955e-15 | 1.00000 |
| rad60syn  | 3.13827e-15 | 1.00000 | 3.13827e-15 | 1.00000 |
| rad14     | 2.90300e-15 | 1.00000 | 2.90300e-15 | 1.00000 |
| PAH3+H    | 2.54767e-15 | 1.00000 | 2.54767e-15 | 1.00000 |
| rad28     | 1.67011e-15 | 1.00000 | 1.67011e-15 | 1.00000 |
| rad60anti | 1.60440e-15 | 1.00000 | 1.60440e-15 | 1.00000 |
| PAH7+H    | 6.55120e-16 | 1.00000 | 6.55120e-16 | 1.00000 |
| rad59     | 4.65964e-16 | 1.00000 | 4.65964e-16 | 1.00000 |
| rad33     | 2.21113e-16 | 1.00000 | 2.21113e-16 | 1.00000 |
| rad38     | 6.13259e-17 | 1.00000 | 6.13259e-17 | 1.00000 |
| PAH10+CH3 | 3.59466e-17 | 1.00000 | 3.59466e-17 | 1.00000 |
| rad8      | 1.31327e-17 | 1.00000 | 1.31327e-17 | 1.00000 |
| rad46     | 2.97599e-18 | 1.00000 | 2.97599e-18 | 1.00000 |
| rad43     | 2.96174e-18 | 1.00000 | 2.96174e-18 | 1.00000 |
| PAH9+H    | 1.98332e-18 | 1.00000 | 1.98332e-18 | 1.00000 |
| rad31     | 7.88365e-19 | 1.00000 | 7.88365e-19 | 1.00000 |
| rad70     | 4.36611e-19 | 1.00000 | 4.36611e-19 | 1.00000 |
| rad58     | 4.15940e-19 | 1.00000 | 4.15940e-19 | 1.00000 |
| rad50     | 6.38522e-20 | 1.00000 | 6.38522e-20 | 1.00000 |
| rad62     | 3.12617e-20 | 1.00000 | 3.12617e-20 | 1.00000 |
| rad39     | 3.05367e-20 | 1.00000 | 3.05367e-20 | 1.00000 |
| PAH1+H    | 2.77680e-20 | 1.00000 | 2.77680e-20 | 1.00000 |
| rad34     | 2.08409e-20 | 1.00000 | 2.08409e-20 | 1.00000 |
| rad41     | 3.52855e-21 | 1.00000 | 3.52855e-21 | 1.00000 |
| rad54     | 2.99305e-21 | 1.00000 | 2.99305e-21 | 1.00000 |
| rad52     | 9.99179e-22 | 1.00000 | 9.99179e-22 | 1.00000 |
| rad51     | 6.94838e-22 | 1.00000 | 6.94838e-22 | 1.00000 |
| rad19syn  | 1.99681e-22 | 1.00000 | 1.99681e-22 | 1.00000 |
| rad42     | 9.09378e-23 | 1.00000 | 9.09378e-23 | 1.00000 |
| rad55     | 6.63125e-23 | 1.00000 | 6.63125e-23 | 1.00000 |
| rad61     | 1.40166e-23 | 1.00000 | 1.40166e-23 | 1.00000 |
| rad47     | 1.56453e-24 | 1.00000 | 1.56453e-24 | 1.00000 |
| rad68syn  | 1.37013e-24 | 1.00000 | 1.37013e-24 | 1.00000 |
| rad68anti | 9.91101e-25 | 1.00000 | 9.91101e-25 | 1.00000 |
| rad65     | 5.22944e-25 | 1.00000 | 5.22944e-25 | 1.00000 |
| rad53     | 1.29821e-25 | 1.00000 | 1.29821e-25 | 1.00000 |
| rad40syn  | 4.47616e-26 | 1.00000 | 4.47616e-26 | 1.00000 |
| rad40anti | 3.45222e-26 | 1.00000 | 3.45222e-26 | 1.00000 |
| PAH8+H    | 1.64083e-26 | 1.00000 | 1.64083e-26 | 1.00000 |
| rad56     | 4.34927e-27 | 1.00000 | 4.34927e-27 | 1.00000 |
| rad64     | 4.33195e-28 | 1.00000 | 4.33195e-28 | 1.00000 |
| rad73     | 1.48193e-28 | 1.00000 | 1.48193e-28 | 1.00000 |
| rad71     | 3.28764e-30 | 1.00000 | 3.28764e-30 | 1.00000 |

1000000.00 Pa, 300.000000 K

=====

| Rate constant             | True (fraction)        | Effective (fraction)   |
|---------------------------|------------------------|------------------------|
| Total                     | 5.34809e-14 (1.00 )    | 5.34809e-14 (1.00 )    |
| Formation of rad19        | 5.34010e-14 (0.999 )   | 5.34010e-14 (0.999 )   |
| H-abstraction to cyc2enyl | 7.95823e-17 (0.00149 ) | 7.95823e-17 (0.00149 ) |
| H-abstraction to cyc1enyl | 3.44981e-19 (6.45e-06) | 3.44981e-19 (6.45e-06) |

| species                       | PYtrue      | Cumul    | PYeffective | Cumul    |
|-------------------------------|-------------|----------|-------------|----------|
| rad9                          | 0.968088    | 0.968088 | 0.968088    | 0.968088 |
| rad19anti                     | 0.0268310   | 0.994919 | 0.0268310   | 0.994919 |
| rad15                         | 0.00308509  | 0.998004 | 0.00308509  | 0.998004 |
| Benzene+cycloprop-2-enylidene | 0.00148805  | 0.999492 | 0.00148805  | 0.999492 |
| Indene+H                      | 0.000499726 | 0.999992 | 0.000499726 | 0.999992 |
| Benzene+cycloprop-1-enylidene | 6.45054e-06 | 0.999998 | 6.45054e-06 | 0.999998 |
| rad12                         | 6.02517e-07 | 0.999999 | 6.02517e-07 | 0.999999 |
| PhCHCCH2+H                    | 5.11567e-07 | 1.000000 | 5.11567e-07 | 1.000000 |
| rad11                         | 2.64397e-08 | 1.000000 | 2.64397e-08 | 1.000000 |
| rad2                          | 2.45991e-08 | 1.000000 | 2.45991e-08 | 1.000000 |
| rad18                         | 6.12450e-09 | 1.000000 | 6.12450e-09 | 1.000000 |
| rad6                          | 6.05332e-09 | 1.000000 | 6.05332e-09 | 1.000000 |
| rad26                         | 3.73334e-09 | 1.000000 | 3.73334e-09 | 1.000000 |
| rad22                         | 2.88121e-09 | 1.000000 | 2.88121e-09 | 1.000000 |
| rad1                          | 2.25790e-09 | 1.000000 | 2.25790e-09 | 1.000000 |
| C2H2+PhCH2                    | 1.59460e-09 | 1.000000 | 1.59460e-09 | 1.000000 |
| rad67                         | 1.14751e-09 | 1.000000 | 1.14751e-09 | 1.000000 |
| PhcycC3H3_A+H                 | 9.79029e-10 | 1.000000 | 9.79029e-10 | 1.000000 |
| rad45                         | 7.72858e-10 | 1.000000 | 7.72858e-10 | 1.000000 |
| rad7                          | 7.10251e-10 | 1.000000 | 7.10251e-10 | 1.000000 |
| rad20                         | 5.88312e-10 | 1.000000 | 5.88312e-10 | 1.000000 |
| rad21                         | 4.60483e-10 | 1.000000 | 4.60483e-10 | 1.000000 |

|                |             |          |             |          |
|----------------|-------------|----------|-------------|----------|
| rad35          | 4.58329e-10 | 1.000000 | 4.58329e-10 | 1.000000 |
| rad10          | 2.99568e-10 | 1.000000 | 2.99568e-10 | 1.000000 |
| Ph+MeAc        | 1.42736e-10 | 1.000000 | 1.42736e-10 | 1.000000 |
| rad23          | 1.42615e-10 | 1.000000 | 1.42615e-10 | 1.000000 |
| PhCCCH3+H      | 1.14996e-10 | 1.000000 | 1.14996e-10 | 1.000000 |
| PhcycC3H3_B+H  | 7.65174e-11 | 1.000000 | 7.65174e-11 | 1.000000 |
| rad3           | 7.36770e-11 | 1.000000 | 7.36770e-11 | 1.000000 |
| PhCCH+CH3      | 4.72086e-11 | 1.000000 | 4.72086e-11 | 1.000000 |
| rad4           | 4.14976e-11 | 1.000000 | 4.14976e-11 | 1.000000 |
| rad5           | 3.58756e-11 | 1.000000 | 3.58756e-11 | 1.000000 |
| Ph+Allene      | 3.33664e-11 | 1.000000 | 3.33664e-11 | 1.000000 |
| rad36          | 2.94615e-11 | 1.000000 | 2.94615e-11 | 1.000000 |
| PhCH2CCH+H     | 1.63794e-11 | 1.000000 | 1.63794e-11 | 1.000000 |
| Phenyl+cycC3H4 | 8.25122e-12 | 1.000000 | 0.000000    | 1.000000 |
| rad30          | 5.67624e-12 | 1.000000 | 5.67624e-12 | 1.000000 |
| rad25          | 2.64203e-12 | 1.000000 | 2.64203e-12 | 1.000000 |
| rad27          | 1.13939e-12 | 1.000000 | 1.13939e-12 | 1.000000 |
| rad13          | 4.89639e-13 | 1.000000 | 4.89639e-13 | 1.000000 |
| rad37          | 1.37128e-13 | 1.000000 | 1.37128e-13 | 1.000000 |
| PAH3+H         | 1.19552e-13 | 1.000000 | 1.19552e-13 | 1.000000 |
| rad28          | 8.57997e-14 | 1.000000 | 8.57997e-14 | 1.000000 |
| rad14          | 7.37505e-14 | 1.000000 | 7.37505e-14 | 1.000000 |
| rad60syn       | 6.90476e-14 | 1.000000 | 6.90476e-14 | 1.000000 |
| rad24          | 6.59995e-14 | 1.000000 | 6.59995e-14 | 1.000000 |
| PAH7+H         | 4.33740e-14 | 1.000000 | 4.33740e-14 | 1.000000 |
| rad60anti      | 3.71988e-14 | 1.000000 | 3.71988e-14 | 1.000000 |
| rad59          | 1.82042e-14 | 1.000000 | 1.82042e-14 | 1.000000 |
| PAH10+CH3      | 7.42166e-15 | 1.000000 | 7.42166e-15 | 1.000000 |
| rad38          | 5.54666e-15 | 1.000000 | 5.54666e-15 | 1.000000 |
| rad8           | 2.39868e-15 | 1.000000 | 2.39868e-15 | 1.000000 |
| rad33          | 1.68525e-15 | 1.000000 | 1.68525e-15 | 1.000000 |
| PAH9+H         | 1.17727e-15 | 1.000000 | 1.17727e-15 | 1.000000 |
| rad43          | 8.40624e-16 | 1.000000 | 8.40624e-16 | 1.000000 |
| rad46          | 4.11479e-16 | 1.000000 | 4.11479e-16 | 1.000000 |
| rad70          | 1.52627e-16 | 1.000000 | 1.52627e-16 | 1.000000 |
| rad58          | 6.86909e-17 | 1.000000 | 6.86909e-17 | 1.000000 |
| rad62          | 5.29389e-17 | 1.000000 | 5.29389e-17 | 1.000000 |
| rad39          | 4.70269e-17 | 1.000000 | 4.70269e-17 | 1.000000 |
| rad50          | 3.50289e-17 | 1.000000 | 3.50289e-17 | 1.000000 |
| PAH1+H         | 2.03588e-17 | 1.000000 | 2.03588e-17 | 1.000000 |
| rad19syn       | 1.85609e-17 | 1.000000 | 1.85609e-17 | 1.000000 |
| rad34          | 1.36637e-17 | 1.000000 | 1.36637e-17 | 1.000000 |
| rad31          | 6.15755e-18 | 1.000000 | 6.15755e-18 | 1.000000 |
| rad41          | 5.47617e-18 | 1.000000 | 5.47617e-18 | 1.000000 |
| rad54          | 4.55382e-18 | 1.000000 | 4.55382e-18 | 1.000000 |
| rad51          | 1.66177e-18 | 1.000000 | 1.66177e-18 | 1.000000 |
| rad52          | 1.21259e-18 | 1.000000 | 1.21259e-18 | 1.000000 |
| rad42          | 6.04369e-19 | 1.000000 | 6.04369e-19 | 1.000000 |
| rad55          | 1.72105e-19 | 1.000000 | 1.72105e-19 | 1.000000 |
| rad61          | 1.30380e-19 | 1.000000 | 1.30380e-19 | 1.000000 |
| rad68syn       | 2.34661e-20 | 1.000000 | 2.34661e-20 | 1.000000 |
| rad68anti      | 1.60649e-20 | 1.000000 | 1.60649e-20 | 1.000000 |
| PAH8+H         | 1.37133e-20 | 1.000000 | 1.37133e-20 | 1.000000 |
| rad65          | 1.23817e-20 | 1.000000 | 1.23817e-20 | 1.000000 |
| rad40syn       | 7.72466e-21 | 1.000000 | 7.72466e-21 | 1.000000 |
| rad40anti      | 6.47140e-21 | 1.000000 | 6.47140e-21 | 1.000000 |
| rad53          | 3.80854e-21 | 1.000000 | 3.80854e-21 | 1.000000 |
| rad56          | 9.52142e-22 | 1.000000 | 9.52142e-22 | 1.000000 |
| rad73          | 3.86132e-22 | 1.000000 | 3.86132e-22 | 1.000000 |
| rad64          | 1.91849e-22 | 1.000000 | 1.91849e-22 | 1.000000 |
| rad71          | 1.52641e-22 | 1.000000 | 1.52641e-22 | 1.000000 |
| rad47          | 9.39751e-23 | 1.000000 | 9.39751e-23 | 1.000000 |
| rad72          | 2.53365e-25 | 1.000000 | 2.53365e-25 | 1.000000 |

1000000.00 Pa, 310.000000 K

=====

| Rate constant             | True (fraction)        | Effective (fraction)   |
|---------------------------|------------------------|------------------------|
| Total                     | 5.92544e-14 (1.00 )    | 5.92544e-14 (1.00 )    |
| Formation of rad19        | 5.91462e-14 (0.998 )   | 5.91462e-14 (0.998 )   |
| H-abstraction to cyc2enyl | 1.07628e-16 (0.00182 ) | 1.07628e-16 (0.00182 ) |
| H-abstraction to cyclenyl | 5.62537e-19 (9.49e-06) | 5.62537e-19 (9.49e-06) |

| species                       | PYtrue      | Cumul    | PYeffective | Cumul    |
|-------------------------------|-------------|----------|-------------|----------|
| rad9                          | 0.973366    | 0.973366 | 0.973366    | 0.973366 |
| rad19anti                     | 0.0216923   | 0.995058 | 0.0216923   | 0.995058 |
| rad15                         | 0.00282156  | 0.997879 | 0.00282156  | 0.997879 |
| Benzene+cycloprop-2-enylidene | 0.00181637  | 0.999696 | 0.00181637  | 0.999696 |
| Indene+H                      | 0.000293989 | 0.999990 | 0.000293989 | 0.999990 |



|                               |             |          |             |          |
|-------------------------------|-------------|----------|-------------|----------|
| Benzene+cycloprop-1-enylidene | 9.49359e-06 | 0.999999 | 9.49359e-06 | 0.999999 |
| rad12                         | 5.86402e-07 | 1.000000 | 5.86402e-07 | 1.000000 |
| PhCHCCH2+H                    | 2.49264e-07 | 1.000000 | 2.49264e-07 | 1.000000 |
| rad11                         | 1.27126e-08 | 1.000000 | 1.27126e-08 | 1.000000 |
| rad2                          | 1.10937e-08 | 1.000000 | 1.10937e-08 | 1.000000 |
| rad18                         | 3.84050e-09 | 1.000000 | 3.84050e-09 | 1.000000 |
| rad26                         | 1.59533e-09 | 1.000000 | 1.59533e-09 | 1.000000 |
| rad6                          | 1.39631e-09 | 1.000000 | 1.39631e-09 | 1.000000 |
| rad1                          | 1.08235e-09 | 1.000000 | 1.08235e-09 | 1.000000 |
| rad22                         | 9.14325e-10 | 1.000000 | 9.14325e-10 | 1.000000 |
| rad7                          | 8.18913e-10 | 1.000000 | 8.18913e-10 | 1.000000 |
| PhcycC3H3_A+H                 | 4.57825e-10 | 1.000000 | 4.57825e-10 | 1.000000 |
| rad20                         | 3.61635e-10 | 1.000000 | 3.61635e-10 | 1.000000 |
| rad67                         | 2.87414e-10 | 1.000000 | 2.87414e-10 | 1.000000 |
| C2H2+PhCH2                    | 2.81083e-10 | 1.000000 | 2.81083e-10 | 1.000000 |
| rad21                         | 2.70463e-10 | 1.000000 | 2.70463e-10 | 1.000000 |
| rad45                         | 2.17475e-10 | 1.000000 | 2.17475e-10 | 1.000000 |
| rad35                         | 1.20370e-10 | 1.000000 | 1.20370e-10 | 1.000000 |
| rad10                         | 5.42120e-11 | 1.000000 | 5.42120e-11 | 1.000000 |
| PhcycC3H3_B+H                 | 2.00320e-11 | 1.000000 | 2.00320e-11 | 1.000000 |
| rad23                         | 1.84685e-11 | 1.000000 | 1.84685e-11 | 1.000000 |
| rad36                         | 1.61636e-11 | 1.000000 | 1.61636e-11 | 1.000000 |
| rad3                          | 1.55947e-11 | 1.000000 | 1.55947e-11 | 1.000000 |
| PhCCCH3+H                     | 1.09276e-11 | 1.000000 | 1.09276e-11 | 1.000000 |
| Phenyl+cycC3H4                | 1.07903e-11 | 1.000000 | 0.000000    | 1.000000 |
| Ph+MeAc                       | 1.07050e-11 | 1.000000 | 1.07050e-11 | 1.000000 |
| rad5                          | 1.06062e-11 | 1.000000 | 1.06062e-11 | 1.000000 |
| rad4                          | 9.08237e-12 | 1.000000 | 9.08237e-12 | 1.000000 |
| Ph+Allene                     | 3.56842e-12 | 1.000000 | 3.56842e-12 | 1.000000 |
| PhCCH+CH3                     | 1.80372e-12 | 1.000000 | 1.80372e-12 | 1.000000 |
| PhCH2CCH+H                    | 1.02411e-12 | 1.000000 | 1.02411e-12 | 1.000000 |
| rad30                         | 9.68442e-13 | 1.000000 | 9.68442e-13 | 1.000000 |
| rad25                         | 8.28715e-13 | 1.000000 | 8.28715e-13 | 1.000000 |
| rad27                         | 3.84685e-13 | 1.000000 | 3.84685e-13 | 1.000000 |
| rad13                         | 1.13977e-13 | 1.000000 | 1.13977e-13 | 1.000000 |
| rad24                         | 3.70593e-14 | 1.000000 | 3.70593e-14 | 1.000000 |
| rad37                         | 8.46813e-15 | 1.000000 | 8.46813e-15 | 1.000000 |
| rad14                         | 7.67260e-15 | 1.000000 | 7.67260e-15 | 1.000000 |
| rad60syn                      | 7.40682e-15 | 1.000000 | 7.40682e-15 | 1.000000 |
| PAH3+H                        | 6.81199e-15 | 1.000000 | 6.81199e-15 | 1.000000 |
| rad28                         | 4.31265e-15 | 1.000000 | 4.31265e-15 | 1.000000 |
| rad60anti                     | 3.82323e-15 | 1.000000 | 3.82323e-15 | 1.000000 |
| PAH7+H                        | 1.87978e-15 | 1.000000 | 1.87978e-15 | 1.000000 |
| rad59                         | 1.22052e-15 | 1.000000 | 1.22052e-15 | 1.000000 |
| rad33                         | 3.93861e-16 | 1.000000 | 3.93861e-16 | 1.000000 |
| rad38                         | 1.75295e-16 | 1.000000 | 1.75295e-16 | 1.000000 |
| PAH10+CH3                     | 1.14268e-16 | 1.000000 | 1.14268e-16 | 1.000000 |
| rad43                         | 1.06421e-17 | 1.000000 | 1.06421e-17 | 1.000000 |
| rad46                         | 9.02276e-18 | 1.000000 | 9.02276e-18 | 1.000000 |
| PAH9+H                        | 7.14258e-18 | 1.000000 | 7.14258e-18 | 1.000000 |
| rad8                          | 6.40213e-18 | 1.000000 | 6.40213e-18 | 1.000000 |
| rad70                         | 1.59951e-18 | 1.000000 | 1.59951e-18 | 1.000000 |
| rad31                         | 1.53726e-18 | 1.000000 | 1.53726e-18 | 1.000000 |
| rad58                         | 1.41396e-18 | 1.000000 | 1.41396e-18 | 1.000000 |
| rad50                         | 2.28960e-19 | 1.000000 | 2.28960e-19 | 1.000000 |
| rad62                         | 1.49673e-19 | 1.000000 | 1.49673e-19 | 1.000000 |
| rad39                         | 1.19683e-19 | 1.000000 | 1.19683e-19 | 1.000000 |
| PAH1+H                        | 1.05528e-19 | 1.000000 | 1.05528e-19 | 1.000000 |
| rad34                         | 8.22355e-20 | 1.000000 | 8.22355e-20 | 1.000000 |
| rad41                         | 1.54805e-20 | 1.000000 | 1.54805e-20 | 1.000000 |
| rad54                         | 1.17194e-20 | 1.000000 | 1.17194e-20 | 1.000000 |
| rad19syn                      | 4.03150e-21 | 1.000000 | 4.03150e-21 | 1.000000 |
| rad52                         | 3.89738e-21 | 1.000000 | 3.89738e-21 | 1.000000 |
| rad51                         | 2.91314e-21 | 1.000000 | 2.91314e-21 | 1.000000 |
| rad42                         | 4.92144e-22 | 1.000000 | 4.92144e-22 | 1.000000 |
| rad55                         | 2.75994e-22 | 1.000000 | 2.75994e-22 | 1.000000 |
| rad61                         | 6.68385e-23 | 1.000000 | 6.68385e-23 | 1.000000 |
| rad68syn                      | 7.12866e-24 | 1.000000 | 7.12866e-24 | 1.000000 |
| rad68anti                     | 5.14131e-24 | 1.000000 | 5.14131e-24 | 1.000000 |
| rad47                         | 4.51475e-24 | 1.000000 | 4.51475e-24 | 1.000000 |
| rad65                         | 2.58623e-24 | 1.000000 | 2.58623e-24 | 1.000000 |
| rad53                         | 6.45781e-25 | 1.000000 | 6.45781e-25 | 1.000000 |
| rad40syn                      | 2.66258e-25 | 1.000000 | 2.66258e-25 | 1.000000 |
| rad40anti                     | 2.07264e-25 | 1.000000 | 2.07264e-25 | 1.000000 |
| PAH8+H                        | 1.02196e-25 | 1.000000 | 1.02196e-25 | 1.000000 |
| rad56                         | 2.38998e-26 | 1.000000 | 2.38998e-26 | 1.000000 |
| rad64                         | 2.39630e-27 | 1.000000 | 2.39630e-27 | 1.000000 |
| rad73                         | 9.46881e-28 | 1.000000 | 9.46881e-28 | 1.000000 |
| rad71                         | 2.26988e-29 | 1.000000 | 2.26988e-29 | 1.000000 |

1000000.00 Pa, 400.000000 K

| Rate constant             | True (fraction)        | Effective (fraction)   |
|---------------------------|------------------------|------------------------|
| Total                     | 1.29463e-13 (1.00 )    | 1.29463e-13 (1.00 )    |
| Formation of rad19        | 1.28526e-13 (0.993 )   | 1.28526e-13 (0.993 )   |
| H-abstraction to cyc2enyl | 9.19357e-16 (0.00710 ) | 9.19357e-16 (0.00710 ) |
| H-abstraction to cyclenyl | 1.69485e-17 (0.000131) | 1.69485e-17 (0.000131) |

| species                       | PYtrue      | Cumul    | PYeffective | Cumul    |
|-------------------------------|-------------|----------|-------------|----------|
| rad9                          | 0.973770    | 0.973770 | 0.973770    | 0.973770 |
| rad19anti                     | 0.0126688   | 0.986439 | 0.0126688   | 0.986439 |
| Benzene+cycloprop-2-enylidene | 0.00710133  | 0.993540 | 0.00710133  | 0.993540 |
| rad15                         | 0.00403433  | 0.997575 | 0.00403433  | 0.997575 |
| Indene+H                      | 0.00228419  | 0.999859 | 0.00228419  | 0.999859 |
| Benzene+cycloprop-1-enylidene | 0.000130914 | 0.999990 | 0.000130914 | 0.999990 |
| PhCHCCH2+H                    | 8.06725e-06 | 0.999998 | 8.06725e-06 | 0.999998 |
| rad12                         | 6.55032e-07 | 0.999998 | 6.55032e-07 | 0.999998 |
| rad2                          | 3.07722e-07 | 0.999999 | 3.07722e-07 | 0.999999 |
| rad6                          | 2.83457e-07 | 0.999999 | 2.83457e-07 | 0.999999 |
| rad11                         | 2.21270e-07 | 0.999999 | 2.21270e-07 | 0.999999 |
| C2H2+PhCH2                    | 9.21227e-08 | 0.999999 | 9.21227e-08 | 0.999999 |
| rad26                         | 6.26939e-08 | 0.999999 | 6.26939e-08 | 0.999999 |
| Ph+MeAc                       | 5.01331e-08 | 0.999999 | 5.01331e-08 | 0.999999 |
| PhcycC3H3_A+H                 | 4.76867e-08 | 1.000000 | 4.76867e-08 | 1.000000 |
| rad67                         | 4.46058e-08 | 1.000000 | 4.46058e-08 | 1.000000 |
| rad22                         | 4.23266e-08 | 1.000000 | 4.23266e-08 | 1.000000 |
| rad1                          | 3.40197e-08 | 1.000000 | 3.40197e-08 | 1.000000 |
| PhCCCH3+H                     | 2.96940e-08 | 1.000000 | 2.96940e-08 | 1.000000 |
| rad45                         | 2.34434e-08 | 1.000000 | 2.34434e-08 | 1.000000 |
| rad10                         | 2.11849e-08 | 1.000000 | 2.11849e-08 | 1.000000 |
| rad18                         | 1.89784e-08 | 1.000000 | 1.89784e-08 | 1.000000 |
| rad35                         | 1.67664e-08 | 1.000000 | 1.67664e-08 | 1.000000 |
| PhCCH+CH3                     | 1.61133e-08 | 1.000000 | 1.61133e-08 | 1.000000 |
| rad23                         | 1.47843e-08 | 1.000000 | 1.47843e-08 | 1.000000 |
| PhcycC3H3_B+H                 | 1.15354e-08 | 1.000000 | 1.15354e-08 | 1.000000 |
| Ph+Allene                     | 9.53840e-09 | 1.000000 | 9.53840e-09 | 1.000000 |
| PhCH2CCH+H                    | 6.54820e-09 | 1.000000 | 6.54820e-09 | 1.000000 |
| rad7                          | 3.07571e-09 | 1.000000 | 3.07571e-09 | 1.000000 |
| rad20                         | 2.70494e-09 | 1.000000 | 2.70494e-09 | 1.000000 |
| rad3                          | 2.26286e-09 | 1.000000 | 2.26286e-09 | 1.000000 |
| rad21                         | 2.17860e-09 | 1.000000 | 2.17860e-09 | 1.000000 |
| rad4                          | 1.33421e-09 | 1.000000 | 1.33421e-09 | 1.000000 |
| rad36                         | 9.74734e-10 | 1.000000 | 9.74734e-10 | 1.000000 |
| rad5                          | 9.50340e-10 | 1.000000 | 9.50340e-10 | 1.000000 |
| rad30                         | 3.57878e-10 | 1.000000 | 3.57878e-10 | 1.000000 |
| Phenyl+cycC3H4                | 2.25486e-10 | 1.000000 | 0.000000    | 1.000000 |
| rad37                         | 1.13903e-10 | 1.000000 | 1.13903e-10 | 1.000000 |
| rad28                         | 6.79276e-11 | 1.000000 | 6.79276e-11 | 1.000000 |
| PAH3+H                        | 3.86118e-11 | 1.000000 | 3.86118e-11 | 1.000000 |
| rad25                         | 3.40089e-11 | 1.000000 | 3.40089e-11 | 1.000000 |
| PAH10+CH3                     | 3.15191e-11 | 1.000000 | 3.15191e-11 | 1.000000 |
| PAH7+H                        | 2.97209e-11 | 1.000000 | 2.97209e-11 | 1.000000 |
| rad13                         | 2.01198e-11 | 1.000000 | 2.01198e-11 | 1.000000 |
| rad27                         | 1.85267e-11 | 1.000000 | 1.85267e-11 | 1.000000 |
| rad38                         | 1.41673e-11 | 1.000000 | 1.41673e-11 | 1.000000 |
| PAH9+H                        | 1.30728e-11 | 1.000000 | 1.30728e-11 | 1.000000 |
| rad60syn                      | 9.90333e-12 | 1.000000 | 9.90333e-12 | 1.000000 |
| rad60anti                     | 5.66828e-12 | 1.000000 | 5.66828e-12 | 1.000000 |
| rad59                         | 5.01634e-12 | 1.000000 | 5.01634e-12 | 1.000000 |
| rad14                         | 3.77066e-12 | 1.000000 | 3.77066e-12 | 1.000000 |
| rad19syn                      | 2.55606e-12 | 1.000000 | 2.55606e-12 | 1.000000 |
| rad46                         | 1.98672e-12 | 1.000000 | 1.98672e-12 | 1.000000 |
| rad43                         | 1.37563e-12 | 1.000000 | 1.37563e-12 | 1.000000 |
| rad39                         | 1.36489e-12 | 1.000000 | 1.36489e-12 | 1.000000 |
| rad50                         | 7.64246e-13 | 1.000000 | 7.64246e-13 | 1.000000 |
| rad70                         | 3.29052e-13 | 1.000000 | 3.29052e-13 | 1.000000 |
| rad24                         | 3.23414e-13 | 1.000000 | 3.23414e-13 | 1.000000 |
| PAH1+H                        | 1.98826e-13 | 1.000000 | 1.98826e-13 | 1.000000 |
| rad51                         | 1.25058e-13 | 1.000000 | 1.25058e-13 | 1.000000 |
| rad62                         | 1.02801e-13 | 1.000000 | 1.02801e-13 | 1.000000 |
| rad58                         | 8.57910e-14 | 1.000000 | 8.57910e-14 | 1.000000 |
| rad54                         | 7.34855e-14 | 1.000000 | 7.34855e-14 | 1.000000 |
| rad33                         | 7.30367e-14 | 1.000000 | 7.30367e-14 | 1.000000 |
| rad52                         | 4.98142e-14 | 1.000000 | 4.98142e-14 | 1.000000 |
| rad34                         | 4.71822e-14 | 1.000000 | 4.71822e-14 | 1.000000 |
| rad41                         | 2.49858e-14 | 1.000000 | 2.49858e-14 | 1.000000 |
| rad61                         | 5.80074e-15 | 1.000000 | 5.80074e-15 | 1.000000 |
| rad55                         | 3.95305e-15 | 1.000000 | 3.95305e-15 | 1.000000 |

|           |             |          |             |          |
|-----------|-------------|----------|-------------|----------|
| rad65     | 2.89042e-15 | 1.000000 | 2.89042e-15 | 1.000000 |
| rad42     | 2.47234e-15 | 1.000000 | 2.47234e-15 | 1.000000 |
| rad8      | 1.52871e-15 | 1.000000 | 1.52871e-15 | 1.000000 |
| rad31     | 1.20275e-15 | 1.000000 | 1.20275e-15 | 1.000000 |
| PAH8+H    | 8.45441e-16 | 1.000000 | 8.45441e-16 | 1.000000 |
| rad73     | 8.38094e-16 | 1.000000 | 8.38094e-16 | 1.000000 |
| rad71     | 8.31786e-16 | 1.000000 | 8.31786e-16 | 1.000000 |
| rad68syn  | 4.99113e-16 | 1.000000 | 4.99113e-16 | 1.000000 |
| rad68anti | 3.33527e-16 | 1.000000 | 3.33527e-16 | 1.000000 |
| rad53     | 3.20085e-16 | 1.000000 | 3.20085e-16 | 1.000000 |
| rad40syn  | 2.71176e-16 | 1.000000 | 2.71176e-16 | 1.000000 |
| rad40anti | 2.23778e-16 | 1.000000 | 2.23778e-16 | 1.000000 |
| rad56     | 1.73180e-16 | 1.000000 | 1.73180e-16 | 1.000000 |
| rad64     | 1.06372e-16 | 1.000000 | 1.06372e-16 | 1.000000 |
| rad72     | 1.40461e-17 | 1.000000 | 1.40461e-17 | 1.000000 |
| rad47     | 3.27474e-19 | 1.000000 | 3.27474e-19 | 1.000000 |

1000000.00 Pa, 500.000000 K

| Rate constant             | True (fraction)        | Effective (fraction)   |
|---------------------------|------------------------|------------------------|
| Total                     | 2.52837e-13 (1.00 )    | 2.52837e-13 (1.00 )    |
| Formation of rad19        | 2.47941e-13 (0.981 )   | 2.47941e-13 (0.981 )   |
| H-abstraction to cyc2enyl | 4.69058e-15 (0.0186 )  | 4.69058e-15 (0.0186 )  |
| H-abstraction to cyclenyl | 2.05381e-16 (0.000812) | 2.05381e-16 (0.000812) |

| species                       | PYtrue      | Cumul    | PYeffective | Cumul    |
|-------------------------------|-------------|----------|-------------|----------|
| rad9                          | 0.956597    | 0.956597 | 0.956597    | 0.956597 |
| Benzene+cycloprop-2-enylidene | 0.0185518   | 0.975148 | 0.0185518   | 0.975148 |
| Indene+H                      | 0.0141918   | 0.989340 | 0.0141918   | 0.989340 |
| rad19anti                     | 0.00488006  | 0.994220 | 0.00488006  | 0.994220 |
| rad15                         | 0.00448527  | 0.998705 | 0.00448527  | 0.998705 |
| Benzene+cycloprop-1-enylidene | 0.000812306 | 0.999518 | 0.000812306 | 0.999518 |
| PhCHCCH2+H                    | 0.000408715 | 0.999926 | 0.000408715 | 0.999926 |
| rad6                          | 1.59479e-05 | 0.999942 | 1.59479e-05 | 0.999942 |
| Ph+MeAc                       | 1.04250e-05 | 0.999953 | 1.04250e-05 | 0.999953 |
| C2H2+PhCH2                    | 9.97493e-06 | 0.999963 | 9.97493e-06 | 0.999963 |
| PhCCCH3+H                     | 4.92027e-06 | 0.999968 | 4.92027e-06 | 0.999968 |
| Ph+Allene                     | 4.18956e-06 | 0.999972 | 4.18956e-06 | 0.999972 |
| rad67                         | 4.14718e-06 | 0.999976 | 4.14718e-06 | 0.999976 |
| PhcycC3H3_A+H                 | 3.42115e-06 | 0.999980 | 3.42115e-06 | 0.999980 |
| PhCH2CCH+H                    | 3.30606e-06 | 0.999983 | 3.30606e-06 | 0.999983 |
| rad2                          | 3.04042e-06 | 0.999986 | 3.04042e-06 | 0.999986 |
| PhCCH+CH3                     | 2.40590e-06 | 0.999988 | 2.40590e-06 | 0.999988 |
| PhcycC3H3_B+H                 | 2.04570e-06 | 0.999990 | 2.04570e-06 | 0.999990 |
| rad26                         | 1.94102e-06 | 0.999992 | 1.94102e-06 | 0.999992 |
| rad35                         | 1.50075e-06 | 0.999994 | 1.50075e-06 | 0.999994 |
| rad11                         | 1.25790e-06 | 0.999995 | 1.25790e-06 | 0.999995 |
| rad12                         | 1.10993e-06 | 0.999996 | 1.10993e-06 | 0.999996 |
| rad45                         | 1.06707e-06 | 0.999997 | 1.06707e-06 | 0.999997 |
| rad23                         | 8.54507e-07 | 0.999998 | 8.54507e-07 | 0.999998 |
| rad10                         | 6.07272e-07 | 0.999999 | 6.07272e-07 | 0.999999 |
| rad1                          | 4.19367e-07 | 0.999999 | 4.19367e-07 | 0.999999 |
| rad22                         | 3.18902e-07 | 0.999999 | 3.18902e-07 | 0.999999 |
| rad37                         | 1.33060e-07 | 1.000000 | 1.33060e-07 | 1.000000 |
| PAH10+CH3                     | 1.12374e-07 | 1.000000 | 1.12374e-07 | 1.000000 |
| rad7                          | 6.80697e-08 | 1.000000 | 6.80697e-08 | 1.000000 |
| PAH7+H                        | 6.03456e-08 | 1.000000 | 6.03456e-08 | 1.000000 |
| rad36                         | 5.24451e-08 | 1.000000 | 5.24451e-08 | 1.000000 |
| rad30                         | 4.83237e-08 | 1.000000 | 4.83237e-08 | 1.000000 |
| PAH9+H                        | 4.76562e-08 | 1.000000 | 4.76562e-08 | 1.000000 |
| rad18                         | 3.70696e-08 | 1.000000 | 3.70696e-08 | 1.000000 |
| rad38                         | 3.69211e-08 | 1.000000 | 3.69211e-08 | 1.000000 |
| rad28                         | 3.11079e-08 | 1.000000 | 3.11079e-08 | 1.000000 |
| rad3                          | 2.78303e-08 | 1.000000 | 2.78303e-08 | 1.000000 |
| PAH3+H                        | 2.59265e-08 | 1.000000 | 2.59265e-08 | 1.000000 |
| rad4                          | 1.72491e-08 | 1.000000 | 1.72491e-08 | 1.000000 |
| rad19syn                      | 1.60139e-08 | 1.000000 | 1.60139e-08 | 1.000000 |
| rad39                         | 1.01661e-08 | 1.000000 | 1.01661e-08 | 1.000000 |
| rad20                         | 9.44588e-09 | 1.000000 | 9.44588e-09 | 1.000000 |
| rad5                          | 9.43214e-09 | 1.000000 | 9.43214e-09 | 1.000000 |
| rad21                         | 7.99966e-09 | 1.000000 | 7.99966e-09 | 1.000000 |
| rad46                         | 7.57769e-09 | 1.000000 | 7.57769e-09 | 1.000000 |
| rad50                         | 6.72282e-09 | 1.000000 | 6.72282e-09 | 1.000000 |
| Phenyl+cycC3H4                | 3.92877e-09 | 1.000000 | 0.000000    | 1.000000 |
| rad60syn                      | 3.10314e-09 | 1.000000 | 3.10314e-09 | 1.000000 |
| rad59                         | 2.79998e-09 | 1.000000 | 2.79998e-09 | 1.000000 |
| rad51                         | 1.92261e-09 | 1.000000 | 1.92261e-09 | 1.000000 |
| rad60anti                     | 1.87929e-09 | 1.000000 | 1.87929e-09 | 1.000000 |

|           |             |         |             |         |
|-----------|-------------|---------|-------------|---------|
| PAH1+H    | 1.31543e-09 | 1.00000 | 1.31543e-09 | 1.00000 |
| rad43     | 9.40323e-10 | 1.00000 | 9.40323e-10 | 1.00000 |
| rad13     | 9.15444e-10 | 1.00000 | 9.15444e-10 | 1.00000 |
| rad54     | 6.64383e-10 | 1.00000 | 6.64383e-10 | 1.00000 |
| rad52     | 5.77598e-10 | 1.00000 | 5.77598e-10 | 1.00000 |
| rad70     | 5.47942e-10 | 1.00000 | 5.47942e-10 | 1.00000 |
| rad25     | 2.17160e-10 | 1.00000 | 2.17160e-10 | 1.00000 |
| rad27     | 1.73230e-10 | 1.00000 | 1.73230e-10 | 1.00000 |
| rad58     | 1.62135e-10 | 1.00000 | 1.62135e-10 | 1.00000 |
| rad34     | 1.14046e-10 | 1.00000 | 1.14046e-10 | 1.00000 |
| rad61     | 8.40738e-11 | 1.00000 | 8.40738e-11 | 1.00000 |
| rad71     | 5.81451e-11 | 1.00000 | 5.81451e-11 | 1.00000 |
| rad62     | 5.73899e-11 | 1.00000 | 5.73899e-11 | 1.00000 |
| rad65     | 5.03223e-11 | 1.00000 | 5.03223e-11 | 1.00000 |
| rad14     | 4.70883e-11 | 1.00000 | 4.70883e-11 | 1.00000 |
| rad55     | 4.45383e-11 | 1.00000 | 4.45383e-11 | 1.00000 |
| rad73     | 4.31927e-11 | 1.00000 | 4.31927e-11 | 1.00000 |
| rad41     | 3.99142e-11 | 1.00000 | 3.99142e-11 | 1.00000 |
| PAH8+H    | 1.47089e-11 | 1.00000 | 1.47089e-11 | 1.00000 |
| rad53     | 8.34396e-12 | 1.00000 | 8.34396e-12 | 1.00000 |
| rad56     | 7.10154e-12 | 1.00000 | 7.10154e-12 | 1.00000 |
| rad68syn  | 4.44535e-12 | 1.00000 | 4.44535e-12 | 1.00000 |
| rad33     | 4.20478e-12 | 1.00000 | 4.20478e-12 | 1.00000 |
| rad64     | 4.13289e-12 | 1.00000 | 4.13289e-12 | 1.00000 |
| rad68anti | 2.91871e-12 | 1.00000 | 2.91871e-12 | 1.00000 |
| rad42     | 2.84588e-12 | 1.00000 | 2.84588e-12 | 1.00000 |
| rad40syn  | 2.82540e-12 | 1.00000 | 2.82540e-12 | 1.00000 |
| rad24     | 2.32757e-12 | 1.00000 | 2.32757e-12 | 1.00000 |
| rad40anti | 2.22999e-12 | 1.00000 | 2.22999e-12 | 1.00000 |
| rad72     | 1.81052e-12 | 1.00000 | 1.81052e-12 | 1.00000 |
| rad31     | 6.25450e-13 | 1.00000 | 6.25450e-13 | 1.00000 |
| rad8      | 3.35604e-14 | 1.00000 | 3.35604e-14 | 1.00000 |
| rad47     | 1.46361e-14 | 1.00000 | 1.46361e-14 | 1.00000 |

1000000.00 Pa, 600.000000 K

=====

| Rate constant             | True (fraction)        | Effective (fraction)   |
|---------------------------|------------------------|------------------------|
| Total                     | 4.35570e-13 (1.00 )    | 4.35570e-13 (1.00 )    |
| Formation of rad19        | 4.18892e-13 (0.962 )   | 4.18892e-13 (0.962 )   |
| H-abstraction to cyc2enyl | 1.54751e-14 (0.0355 )  | 1.54751e-14 (0.0355 )  |
| H-abstraction to cyclenyl | 1.20343e-15 (0.00276 ) | 1.20343e-15 (0.00276 ) |

| species                       | PYtrue      | Cumul    | PYeffective | Cumul    |
|-------------------------------|-------------|----------|-------------|----------|
| rad9                          | 0.840502    | 0.840502 | 0.840502    | 0.840502 |
| Indene+H                      | 0.0973961   | 0.937898 | 0.0973961   | 0.937898 |
| Benzene+cycloprop-2-enylidene | 0.0355285   | 0.973426 | 0.0355285   | 0.973426 |
| PhCHCCH2+H                    | 0.0145824   | 0.988009 | 0.0145824   | 0.988009 |
| rad15                         | 0.00412241  | 0.992131 | 0.00412241  | 0.992131 |
| Benzene+cycloprop-1-enylidene | 0.00276289  | 0.994894 | 0.00276289  | 0.994894 |
| rad19anti                     | 0.00219118  | 0.997085 | 0.00219118  | 0.997085 |
| Ph+MeAc                       | 0.000482720 | 0.997568 | 0.000482720 | 0.997568 |
| C2H2+PhCH2                    | 0.000452572 | 0.998020 | 0.000452572 | 0.998020 |
| Ph+Allene                     | 0.000352232 | 0.998373 | 0.000352232 | 0.998373 |
| PhCH2CCH+H                    | 0.000277547 | 0.998650 | 0.000277547 | 0.998650 |
| rad6                          | 0.000249353 | 0.998899 | 0.000249353 | 0.998899 |
| PhcycC3H3_A+H                 | 0.000197004 | 0.999096 | 0.000197004 | 0.999096 |
| PhCCCH3+H                     | 0.000195845 | 0.999292 | 0.000195845 | 0.999292 |
| PhcycC3H3_B+H                 | 0.000195667 | 0.999488 | 0.000195667 | 0.999488 |
| rad67                         | 0.000185871 | 0.999674 | 0.000185871 | 0.999674 |
| PhCCH+CH3                     | 0.000110663 | 0.999785 | 0.000110663 | 0.999785 |
| rad35                         | 6.70613e-05 | 0.999852 | 6.70613e-05 | 0.999852 |
| rad45                         | 2.30215e-05 | 0.999875 | 2.30215e-05 | 0.999875 |
| rad26                         | 1.81003e-05 | 0.999893 | 1.81003e-05 | 0.999893 |
| PAH10+CH3                     | 1.73772e-05 | 0.999910 | 1.73772e-05 | 0.999910 |
| rad2                          | 1.69809e-05 | 0.999927 | 1.69809e-05 | 0.999927 |
| rad23                         | 1.21960e-05 | 0.999939 | 1.21960e-05 | 0.999939 |
| rad37                         | 1.13913e-05 | 0.999951 | 1.13913e-05 | 0.999951 |
| PAH7+H                        | 7.79286e-06 | 0.999958 | 7.79286e-06 | 0.999958 |
| PAH9+H                        | 5.51699e-06 | 0.999964 | 5.51699e-06 | 0.999964 |
| rad38                         | 4.33823e-06 | 0.999968 | 4.33823e-06 | 0.999968 |
| rad10                         | 3.90431e-06 | 0.999972 | 3.90431e-06 | 0.999972 |
| rad11                         | 3.59887e-06 | 0.999976 | 3.59887e-06 | 0.999976 |
| rad12                         | 3.33856e-06 | 0.999979 | 3.33856e-06 | 0.999979 |
| PAH3+H                        | 3.31137e-06 | 0.999982 | 3.31137e-06 | 0.999982 |
| rad1                          | 2.79006e-06 | 0.999985 | 2.79007e-06 | 0.999985 |
| rad30                         | 2.67020e-06 | 0.999988 | 2.67020e-06 | 0.999988 |
| rad19syn                      | 1.57893e-06 | 0.999989 | 1.57894e-06 | 0.999989 |
| rad36                         | 1.41134e-06 | 0.999991 | 1.41134e-06 | 0.999991 |

|                |             |          |             |          |
|----------------|-------------|----------|-------------|----------|
| rad39          | 1.38696e-06 | 0.999992 | 1.38696e-06 | 0.999992 |
| rad7           | 1.01565e-06 | 0.999993 | 1.01565e-06 | 0.999993 |
| rad50          | 1.01562e-06 | 0.999994 | 1.01562e-06 | 0.999994 |
| rad22          | 9.41185e-07 | 0.999995 | 9.41185e-07 | 0.999995 |
| rad46          | 9.33562e-07 | 0.999996 | 9.33562e-07 | 0.999996 |
| rad28          | 8.04056e-07 | 0.999997 | 8.04056e-07 | 0.999997 |
| rad51          | 3.25886e-07 | 0.999997 | 3.25886e-07 | 0.999997 |
| rad59          | 3.20851e-07 | 0.999998 | 3.20851e-07 | 0.999998 |
| PAH1+H         | 2.98410e-07 | 0.999998 | 2.98410e-07 | 0.999998 |
| rad60syn       | 2.69356e-07 | 0.999998 | 2.69356e-07 | 0.999998 |
| rad60anti      | 1.67809e-07 | 0.999998 | 1.67809e-07 | 0.999998 |
| rad3           | 1.55137e-07 | 0.999999 | 1.55137e-07 | 0.999999 |
| rad54          | 1.40448e-07 | 0.999999 | 1.40448e-07 | 0.999999 |
| Phenyl+cycC3H4 | 1.06456e-07 | 0.999999 | 0.00000     | 0.999999 |
| rad4           | 1.01437e-07 | 0.999999 | 1.01437e-07 | 0.999999 |
| rad52          | 9.22783e-08 | 0.999999 | 9.22783e-08 | 0.999999 |
| rad43          | 9.10576e-08 | 0.999999 | 9.10576e-08 | 0.999999 |
| rad70          | 8.01302e-08 | 0.999999 | 8.01302e-08 | 0.999999 |
| rad18          | 5.22677e-08 | 0.999999 | 5.22677e-08 | 0.999999 |
| rad58          | 3.27215e-08 | 0.999999 | 3.27215e-08 | 0.999999 |
| rad5           | 2.57547e-08 | 0.999999 | 2.57548e-08 | 0.999999 |
| rad61          | 2.55665e-08 | 0.999999 | 2.55665e-08 | 0.999999 |
| rad20          | 2.36699e-08 | 0.999999 | 2.36699e-08 | 0.999999 |
| rad21          | 2.12817e-08 | 0.999999 | 2.12817e-08 | 0.999999 |
| rad34          | 2.00165e-08 | 0.999999 | 2.00165e-08 | 0.999999 |
| rad13          | 1.41746e-08 | 0.999999 | 1.41746e-08 | 0.999999 |
| rad71          | 1.26891e-08 | 0.999999 | 1.26891e-08 | 0.999999 |
| rad55          | 1.03732e-08 | 0.999999 | 1.03732e-08 | 0.999999 |
| rad73          | 8.99079e-09 | 0.999999 | 8.99079e-09 | 0.999999 |
| rad65          | 8.70397e-09 | 0.999999 | 8.70397e-09 | 0.999999 |
| PAH8+H         | 6.65666e-09 | 0.999999 | 6.65666e-09 | 0.999999 |
| rad41          | 6.27110e-09 | 0.999999 | 6.27110e-09 | 0.999999 |
| rad62          | 5.31186e-09 | 0.999999 | 5.31186e-09 | 0.999999 |
| rad56          | 2.92496e-09 | 0.999999 | 2.92496e-09 | 0.999999 |
| rad53          | 2.83908e-09 | 0.999999 | 2.83908e-09 | 0.999999 |
| rad68syn       | 1.38424e-09 | 0.999999 | 1.38424e-09 | 0.999999 |
| rad64          | 1.23170e-09 | 0.999999 | 1.23170e-09 | 0.999999 |
| rad40syn       | 1.05907e-09 | 0.999999 | 1.05907e-09 | 0.999999 |
| rad68anti      | 9.02085e-10 | 0.999999 | 9.02085e-10 | 0.999999 |
| rad40anti      | 8.44925e-10 | 0.999999 | 8.44925e-10 | 0.999999 |
| rad25          | 6.58790e-10 | 0.999999 | 6.58790e-10 | 0.999999 |
| rad27          | 6.46282e-10 | 0.999999 | 6.46282e-10 | 0.999999 |
| rad72          | 4.31358e-10 | 0.999999 | 4.31358e-10 | 0.999999 |
| rad42          | 4.01712e-10 | 0.999999 | 4.01712e-10 | 0.999999 |
| rad14          | 1.85816e-10 | 0.999999 | 1.85816e-10 | 0.999999 |
| rad47          | 1.62088e-10 | 0.999999 | 1.62088e-10 | 0.999999 |
| rad31          | 1.49519e-10 | 0.999999 | 1.49519e-10 | 0.999999 |
| rad33          | 8.35844e-11 | 0.999999 | 8.35844e-11 | 0.999999 |
| rad24          | 3.85842e-11 | 0.999999 | 3.85842e-11 | 0.999999 |
| rad8           | 9.99821e-13 | 0.999999 | 9.99821e-13 | 0.999999 |

1000000.00 Pa, 700.000000 K

=====

| Rate constant             | True (fraction)        | Effective (fraction)   |
|---------------------------|------------------------|------------------------|
| Total                     | 6.91694e-13 (1.00 )    | 6.91692e-13 (1.00 )    |
| Formation of rad19        | 6.47922e-13 (0.937 )   | 6.47921e-13 (0.937 )   |
| H-abstraction to cyc2enyl | 3.91858e-14 (0.0567 )  | 3.91858e-14 (0.0567 )  |
| H-abstraction to cyclenyl | 4.58543e-15 (0.00663 ) | 4.58541e-15 (0.00663 ) |

| species                       | PYtrue      | Cumul    | PYeffective | Cumul    |
|-------------------------------|-------------|----------|-------------|----------|
| rad9                          | 0.551010    | 0.551010 | 0.551012    | 0.551012 |
| Indene+H                      | 0.272055    | 0.823065 | 0.272056    | 0.823067 |
| PhCHCCH2+H                    | 0.0911465   | 0.914211 | 0.0911467   | 0.914214 |
| Benzene+cycloprop-2-enylidene | 0.0566520   | 0.970863 | 0.0566521   | 0.970866 |
| Benzene+cycloprop-1-enylidene | 0.00662927  | 0.977493 | 0.00662927  | 0.977496 |
| Ph+MeAc                       | 0.00318006  | 0.980673 | 0.00318007  | 0.980676 |
| C2H2+PhCH2                    | 0.00302819  | 0.983701 | 0.00302820  | 0.983704 |
| Ph+Allene                     | 0.00279138  | 0.986492 | 0.00279139  | 0.986495 |
| PhCH2CCH+H                    | 0.00225625  | 0.988748 | 0.00225626  | 0.988752 |
| rad15                         | 0.00220055  | 0.990949 | 0.00220056  | 0.990952 |
| PhcycC3H3_B+H                 | 0.00152307  | 0.992472 | 0.00152308  | 0.992475 |
| PhcycC3H3_A+H                 | 0.00136921  | 0.993841 | 0.00136921  | 0.993844 |
| rad67                         | 0.00125394  | 0.995095 | 0.00125394  | 0.995098 |
| PhCCCH3+H                     | 0.00119964  | 0.996295 | 0.00119965  | 0.996298 |
| rad19anti                     | 0.00101060  | 0.997305 | 0.00101060  | 0.997309 |
| PhCCH+CH3                     | 0.000771648 | 0.998077 | 0.000771650 | 0.998080 |
| rad6                          | 0.000652416 | 0.998729 | 0.000652418 | 0.998733 |
| rad35                         | 0.000452734 | 0.999182 | 0.000452735 | 0.999185 |

|                |             |          |             |          |
|----------------|-------------|----------|-------------|----------|
| PAH10+CH3      | 0.000167538 | 0.999350 | 0.000167539 | 0.999353 |
| rad45          | 0.000133218 | 0.999483 | 0.000133218 | 0.999486 |
| rad37          | 8.48596e-05 | 0.999568 | 8.48599e-05 | 0.999571 |
| PAH7+H         | 6.48799e-05 | 0.999633 | 6.48800e-05 | 0.999636 |
| rad23          | 5.87254e-05 | 0.999691 | 5.87256e-05 | 0.999695 |
| PAH9+H         | 4.21125e-05 | 0.999734 | 4.21126e-05 | 0.999737 |
| rad2           | 4.14598e-05 | 0.999775 | 4.14599e-05 | 0.999778 |
| rad38          | 3.47991e-05 | 0.999810 | 3.47992e-05 | 0.999813 |
| PAH3+H         | 3.29854e-05 | 0.999843 | 3.29855e-05 | 0.999846 |
| rad26          | 3.23053e-05 | 0.999875 | 3.23054e-05 | 0.999878 |
| rad30          | 1.95895e-05 | 0.999895 | 1.95896e-05 | 0.999898 |
| rad12          | 1.28021e-05 | 0.999907 | 1.28021e-05 | 0.999911 |
| rad39          | 1.10050e-05 | 0.999918 | 1.10050e-05 | 0.999922 |
| rad36          | 1.06281e-05 | 0.999929 | 1.06281e-05 | 0.999932 |
| rad19syn       | 8.99403e-06 | 0.999938 | 8.99404e-06 | 0.999941 |
| rad50          | 7.98947e-06 | 0.999946 | 7.98950e-06 | 0.999949 |
| rad1           | 7.97327e-06 | 0.999954 | 7.97329e-06 | 0.999957 |
| rad46          | 7.09911e-06 | 0.999961 | 7.09913e-06 | 0.999964 |
| rad10          | 6.32723e-06 | 0.999967 | 6.32724e-06 | 0.999971 |
| rad11          | 4.74071e-06 | 0.999972 | 4.74072e-06 | 0.999975 |
| PAH1+H         | 3.28517e-06 | 0.999976 | 3.28518e-06 | 0.999979 |
| rad59          | 3.07421e-06 | 0.999979 | 3.07422e-06 | 0.999982 |
| rad7           | 2.62937e-06 | 0.999981 | 2.62938e-06 | 0.999984 |
| rad51          | 2.61112e-06 | 0.999984 | 2.61113e-06 | 0.999987 |
| Phenyl+cycC3H4 | 2.56395e-06 | 0.999986 | 0.00000     | 0.999987 |
| rad60syn       | 2.34595e-06 | 0.999989 | 2.34596e-06 | 0.999992 |
| rad28          | 2.29805e-06 | 0.999991 | 2.29806e-06 | 0.999992 |
| rad60anti      | 1.47634e-06 | 0.999993 | 1.47635e-06 | 0.999993 |
| rad54          | 1.41625e-06 | 0.999994 | 1.41625e-06 | 0.999995 |
| rad22          | 1.26734e-06 | 0.999995 | 1.26735e-06 | 0.999996 |
| rad43          | 8.06031e-07 | 0.999996 | 8.06034e-07 | 0.999997 |
| rad70          | 7.93583e-07 | 0.999997 | 7.93585e-07 | 0.999997 |
| rad52          | 7.31795e-07 | 0.999998 | 7.31796e-07 | 0.999998 |
| rad58          | 3.74976e-07 | 0.999998 | 3.74977e-07 | 0.999999 |
| rad61          | 3.12293e-07 | 0.999998 | 3.12293e-07 | 0.999999 |
| rad3           | 3.02038e-07 | 0.999999 | 3.02039e-07 | 0.999999 |
| rad4           | 2.13766e-07 | 0.999999 | 2.13767e-07 | 0.999999 |
| rad34          | 2.11146e-07 | 0.999999 | 2.11147e-07 | 1.000000 |
| rad55          | 1.08657e-07 | 0.999999 | 1.08658e-07 | 1.000000 |
| rad71          | 1.05060e-07 | 0.999999 | 1.05060e-07 | 1.000000 |
| PAH8+H         | 9.35005e-08 | 0.999999 | 9.35007e-08 | 1.000000 |
| rad73          | 7.37606e-08 | 0.999999 | 7.37608e-08 | 1.000000 |
| rad65          | 7.15904e-08 | 0.999999 | 7.15906e-08 | 1.000000 |
| rad41          | 6.58388e-08 | 0.999999 | 6.58390e-08 | 1.000000 |
| rad18          | 4.73455e-08 | 1.000000 | 4.73456e-08 | 1.000000 |
| rad62          | 4.61329e-08 | 1.000000 | 4.61330e-08 | 1.000000 |
| rad13          | 4.32510e-08 | 1.000000 | 4.32511e-08 | 1.000000 |
| rad21          | 3.92747e-08 | 1.000000 | 3.92748e-08 | 1.000000 |
| rad20          | 3.88518e-08 | 1.000000 | 3.88519e-08 | 1.000000 |
| rad56          | 3.75289e-08 | 1.000000 | 3.75290e-08 | 1.000000 |
| rad53          | 3.42037e-08 | 1.000000 | 3.42038e-08 | 1.000000 |
| rad5           | 2.32023e-08 | 1.000000 | 2.32023e-08 | 1.000000 |
| rad68syn       | 1.74109e-08 | 1.000000 | 1.74110e-08 | 1.000000 |
| rad40syn       | 1.42128e-08 | 1.000000 | 1.42128e-08 | 1.000000 |
| rad64          | 1.39849e-08 | 1.000000 | 1.39849e-08 | 1.000000 |
| rad47          | 1.37111e-08 | 1.000000 | 1.37112e-08 | 1.000000 |
| rad40anti      | 1.14101e-08 | 1.000000 | 1.14102e-08 | 1.000000 |
| rad68anti      | 1.13222e-08 | 1.000000 | 1.13222e-08 | 1.000000 |
| rad31          | 4.20350e-09 | 1.000000 | 4.20351e-09 | 1.000000 |
| rad42          | 4.03962e-09 | 1.000000 | 4.03963e-09 | 1.000000 |
| rad72          | 3.64212e-09 | 1.000000 | 3.64213e-09 | 1.000000 |
| rad27          | 1.12159e-09 | 1.000000 | 1.12159e-09 | 1.000000 |
| rad25          | 1.00916e-09 | 1.000000 | 1.00916e-09 | 1.000000 |
| rad24          | 7.52832e-10 | 1.000000 | 7.52834e-10 | 1.000000 |
| rad33          | 4.26365e-10 | 1.000000 | 4.26366e-10 | 1.000000 |
| rad14          | 2.98855e-10 | 1.000000 | 2.98856e-10 | 1.000000 |
| rad8           | 2.65262e-11 | 1.000000 | 2.65263e-11 | 1.000000 |

1000000.00 Pa, 800.000000 K

| Rate constant             | True (fraction)       | Effective (fraction)  |
|---------------------------|-----------------------|-----------------------|
| Total                     | 1.03759e-12 (1.00 )   | 1.03758e-12 (1.00 )   |
| Formation of rad19        | 9.41065e-13 (0.907 )  | 9.41055e-13 (0.907 )  |
| H-abstraction to cyc2enyl | 8.32953e-14 (0.0803 ) | 8.32953e-14 (0.0803 ) |
| H-abstraction to cyclenyl | 1.32261e-14 (0.0127 ) | 1.32260e-14 (0.0127 ) |

  

| species | PYtrue   | Cumul    | PYeffective | Cumul    |
|---------|----------|----------|-------------|----------|
| rad9    | 0.359951 | 0.359951 | 0.359955    | 0.359955 |

|                               |             |          |             |          |
|-------------------------------|-------------|----------|-------------|----------|
| Indene+H                      | 0.324297    | 0.684248 | 0.324300    | 0.684254 |
| PhCHCCH2+H                    | 0.182346    | 0.866594 | 0.182347    | 0.866601 |
| Benzene+cycloprop-2-enylidene | 0.0802780   | 0.946872 | 0.0802787   | 0.946880 |
| Benzene+cycloprop-1-enylidene | 0.0127470   | 0.959619 | 0.0127470   | 0.959627 |
| Ph+MeAc                       | 0.00650341  | 0.966122 | 0.00650348  | 0.966130 |
| C2H2+PhCH2                    | 0.00626262  | 0.972385 | 0.00626268  | 0.972393 |
| Ph+Allene                     | 0.00614070  | 0.978525 | 0.00614076  | 0.978534 |
| PhCH2CCH+H                    | 0.00516335  | 0.983689 | 0.00516340  | 0.983697 |
| PhcycC3H3_B+H                 | 0.00271997  | 0.986409 | 0.00272000  | 0.986417 |
| rad67                         | 0.00261514  | 0.989024 | 0.00261517  | 0.989032 |
| PhcycC3H3_A+H                 | 0.00237515  | 0.991399 | 0.00237518  | 0.991408 |
| PhCCCH3+H                     | 0.00234127  | 0.993740 | 0.00234130  | 0.993749 |
| PhCCH+CH3                     | 0.00165722  | 0.995398 | 0.00165723  | 0.995406 |
| rad35                         | 0.000945385 | 0.996343 | 0.000945394 | 0.996352 |
| rad15                         | 0.000762310 | 0.997105 | 0.000762317 | 0.997114 |
| rad19anti                     | 0.000652062 | 0.997757 | 0.000652069 | 0.997766 |
| rad6                          | 0.000528427 | 0.998286 | 0.000528432 | 0.998294 |
| PAH10+CH3                     | 0.000419445 | 0.998705 | 0.000419449 | 0.998714 |
| rad45                         | 0.000271188 | 0.998976 | 0.000271191 | 0.998985 |
| rad37                         | 0.000178286 | 0.999155 | 0.000178288 | 0.999163 |
| PAH7+H                        | 0.000143616 | 0.999298 | 0.000143617 | 0.999307 |
| rad23                         | 0.000105876 | 0.999404 | 0.000105877 | 0.999413 |
| PAH9+H                        | 9.20825e-05 | 0.999496 | 9.20833e-05 | 0.999505 |
| PAH3+H                        | 8.69562e-05 | 0.999583 | 8.69571e-05 | 0.999592 |
| rad38                         | 7.80496e-05 | 0.999661 | 7.80503e-05 | 0.999670 |
| rad12                         | 5.58386e-05 | 0.999717 | 5.58391e-05 | 0.999726 |
| rad30                         | 4.29604e-05 | 0.999760 | 4.29608e-05 | 0.999769 |
| rad2                          | 4.27025e-05 | 0.999803 | 4.27029e-05 | 0.999811 |
| rad36                         | 2.70624e-05 | 0.999830 | 2.70627e-05 | 0.999838 |
| rad39                         | 2.34352e-05 | 0.999853 | 2.34354e-05 | 0.999862 |
| rad26                         | 2.02894e-05 | 0.999874 | 2.02896e-05 | 0.999882 |
| rad50                         | 1.77059e-05 | 0.999891 | 1.77060e-05 | 0.999900 |
| rad46                         | 1.54163e-05 | 0.999907 | 1.54165e-05 | 0.999915 |
| rad19syn                      | 1.45096e-05 | 0.999921 | 1.45098e-05 | 0.999930 |
| rad1                          | 1.01104e-05 | 0.999931 | 1.01105e-05 | 0.999940 |
| Phenyl+cycC3H4                | 9.30756e-06 | 0.999941 | 0.000000    | 0.999940 |
| PAH1+H                        | 8.94873e-06 | 0.999950 | 8.94882e-06 | 0.999949 |
| rad59                         | 7.91358e-06 | 0.999957 | 7.91366e-06 | 0.999957 |
| rad51                         | 5.85485e-06 | 0.999963 | 5.85491e-06 | 0.999963 |
| rad60syn                      | 5.70791e-06 | 0.999969 | 5.70797e-06 | 0.999968 |
| rad10                         | 4.50165e-06 | 0.999974 | 4.50169e-06 | 0.999973 |
| rad60anti                     | 3.61375e-06 | 0.999977 | 3.61378e-06 | 0.999976 |
| rad54                         | 3.50434e-06 | 0.999981 | 3.50438e-06 | 0.999980 |
| rad11                         | 3.34121e-06 | 0.999984 | 3.34125e-06 | 0.999983 |
| rad7                          | 2.18921e-06 | 0.999986 | 2.18923e-06 | 0.999985 |
| rad70                         | 2.05300e-06 | 0.999988 | 2.05302e-06 | 0.999988 |
| rad43                         | 1.94686e-06 | 0.999990 | 1.94687e-06 | 0.999989 |
| rad28                         | 1.89064e-06 | 0.999992 | 1.89066e-06 | 0.999991 |
| rad52                         | 1.63005e-06 | 0.999994 | 1.63007e-06 | 0.999993 |
| rad22                         | 1.17681e-06 | 0.999995 | 1.17683e-06 | 0.999994 |
| rad58                         | 1.07305e-06 | 0.999996 | 1.07306e-06 | 0.999995 |
| rad61                         | 9.09759e-07 | 0.999997 | 9.09768e-07 | 0.999996 |
| rad34                         | 5.68456e-07 | 0.999997 | 5.68461e-07 | 0.999997 |
| PAH8+H                        | 2.98306e-07 | 0.999998 | 2.98308e-07 | 0.999997 |
| rad55                         | 2.76563e-07 | 0.999998 | 2.76565e-07 | 0.999997 |
| rad3                          | 2.74774e-07 | 0.999998 | 2.74777e-07 | 0.999998 |
| rad71                         | 2.42021e-07 | 0.999999 | 2.42023e-07 | 0.999998 |
| rad4                          | 2.12832e-07 | 0.999999 | 2.12834e-07 | 0.999998 |
| rad41                         | 1.75387e-07 | 0.999999 | 1.75389e-07 | 0.999998 |
| rad73                         | 1.68663e-07 | 0.999999 | 1.68665e-07 | 0.999998 |
| rad65                         | 1.64549e-07 | 0.999999 | 1.64550e-07 | 0.999999 |
| rad56                         | 1.10621e-07 | 0.999999 | 1.10623e-07 | 0.999999 |
| rad62                         | 1.09181e-07 | 0.999999 | 1.09182e-07 | 0.999999 |
| rad53                         | 9.64232e-08 | 1.000000 | 9.64241e-08 | 0.999999 |
| rad21                         | 7.39762e-08 | 1.000000 | 7.39770e-08 | 0.999999 |
| rad47                         | 6.34807e-08 | 1.000000 | 6.34814e-08 | 0.999999 |
| rad20                         | 6.08461e-08 | 1.000000 | 6.08466e-08 | 0.999999 |
| rad13                         | 5.55227e-08 | 1.000000 | 5.55232e-08 | 0.999999 |
| rad68syn                      | 5.22987e-08 | 1.000000 | 5.22992e-08 | 0.999999 |
| rad40syn                      | 4.39842e-08 | 1.000000 | 4.39846e-08 | 0.999999 |
| rad64                         | 3.87168e-08 | 1.000000 | 3.87171e-08 | 0.999999 |
| rad40anti                     | 3.53644e-08 | 1.000000 | 3.53647e-08 | 0.999999 |
| rad18                         | 3.41735e-08 | 1.000000 | 3.41738e-08 | 0.999999 |
| rad68anti                     | 3.39641e-08 | 1.000000 | 3.39645e-08 | 0.999999 |
| rad31                         | 1.77070e-08 | 1.000000 | 1.77071e-08 | 0.999999 |
| rad5                          | 1.08398e-08 | 1.000000 | 1.08400e-08 | 0.999999 |
| rad42                         | 1.04209e-08 | 1.000000 | 1.04210e-08 | 0.999999 |
| rad24                         | 1.03259e-08 | 1.000000 | 1.03260e-08 | 0.999999 |
| rad72                         | 8.51777e-09 | 1.000000 | 8.51786e-09 | 0.999999 |
| rad8                          | 3.04961e-09 | 1.000000 | 3.04965e-09 | 0.999999 |

|       |             |         |             |          |
|-------|-------------|---------|-------------|----------|
| rad27 | 1.48245e-09 | 1.00000 | 1.48246e-09 | 0.999999 |
| rad33 | 1.27185e-09 | 1.00000 | 1.27187e-09 | 0.999999 |
| rad25 | 1.10597e-09 | 1.00000 | 1.10597e-09 | 0.999999 |
| rad14 | 2.98327e-10 | 1.00000 | 2.98330e-10 | 0.999999 |

1000000.00 Pa, 900.000000 K

=====

| Rate constant             | True (fraction)       | Effective (fraction)  |
|---------------------------|-----------------------|-----------------------|
| Total                     | 1.49199e-12 (1.00 )   | 1.49197e-12 (1.00 )   |
| Formation of rad19        | 1.30395e-12 (0.874 )  | 1.30393e-12 (0.874 )  |
| H-abstraction to cyc2enyl | 1.56554e-13 (0.105 )  | 1.56554e-13 (0.105 )  |
| H-abstraction to cyclenyl | 3.14892e-14 (0.0211 ) | 3.14886e-14 (0.0211 ) |

| species                       | PYtrue      | Cumul    | PYeffective | Cumul    |
|-------------------------------|-------------|----------|-------------|----------|
| Indene+H                      | 0.314111    | 0.314111 | 0.314116    | 0.314116 |
| rad9                          | 0.285263    | 0.599374 | 0.285268    | 0.599383 |
| PhCHCCH2+H                    | 0.225660    | 0.825034 | 0.225663    | 0.825047 |
| Benzene+cycloprop-2-enylidene | 0.104929    | 0.929963 | 0.104931    | 0.929978 |
| Benzene+cycloprop-1-enylidene | 0.0211054   | 0.951068 | 0.0211054   | 0.951083 |
| Ph+MeAc                       | 0.00811617  | 0.959185 | 0.00811631  | 0.959200 |
| C2H2+PhCH2                    | 0.00785506  | 0.967040 | 0.00785519  | 0.967055 |
| Ph+Allene                     | 0.00783941  | 0.974879 | 0.00783954  | 0.974894 |
| PhCH2CCH+H                    | 0.00673867  | 0.981618 | 0.00673878  | 0.981633 |
| rad67                         | 0.00329209  | 0.984910 | 0.00329213  | 0.984925 |
| PhcycC3H3_B+H                 | 0.00291300  | 0.987823 | 0.00291305  | 0.987838 |
| PhCCCH3+H                     | 0.00285916  | 0.990682 | 0.00285921  | 0.990698 |
| PhcycC3H3_A+H                 | 0.00252111  | 0.993203 | 0.00252116  | 0.993219 |
| PhCCH+CH3                     | 0.00211310  | 0.995316 | 0.00211313  | 0.995332 |
| rad35                         | 0.00119137  | 0.996508 | 0.00119139  | 0.996523 |
| PAH10+CH3                     | 0.000565399 | 0.997073 | 0.000565409 | 0.997089 |
| rad19anti                     | 0.000483612 | 0.997557 | 0.000483620 | 0.997572 |
| rad6                          | 0.000342286 | 0.997899 | 0.000342291 | 0.997915 |
| rad45                         | 0.000341571 | 0.998240 | 0.000341576 | 0.998256 |
| rad15                         | 0.000338231 | 0.998579 | 0.000338237 | 0.998594 |
| rad12                         | 0.000232634 | 0.998811 | 0.000232638 | 0.998827 |
| rad37                         | 0.000222099 | 0.999033 | 0.000222103 | 0.999049 |
| PAH7+H                        | 0.000183867 | 0.999217 | 0.000183869 | 0.999233 |
| PAH3+H                        | 0.000121008 | 0.999338 | 0.000121010 | 0.999354 |
| PAH9+H                        | 0.000120684 | 0.999459 | 0.000120686 | 0.999475 |
| rad23                         | 0.000111177 | 0.999570 | 0.000111179 | 0.999586 |
| rad38                         | 0.000102039 | 0.999672 | 0.000102041 | 0.999688 |
| rad30                         | 5.52528e-05 | 0.999727 | 5.52537e-05 | 0.999743 |
| rad2                          | 3.77325e-05 | 0.999765 | 3.77331e-05 | 0.999781 |
| rad36                         | 3.50660e-05 | 0.999800 | 3.50666e-05 | 0.999816 |
| rad39                         | 2.97246e-05 | 0.999830 | 2.97251e-05 | 0.999846 |
| rad50                         | 2.35822e-05 | 0.999854 | 2.35826e-05 | 0.999869 |
| rad46                         | 2.02269e-05 | 0.999874 | 2.02272e-05 | 0.999890 |
| Phenyl+cycC3H4                | 1.57389e-05 | 0.999890 | 0.00000     | 0.999890 |
| rad19syn                      | 1.52079e-05 | 0.999905 | 1.52081e-05 | 0.999905 |
| PAH1+H                        | 1.25395e-05 | 0.999917 | 1.25397e-05 | 0.999917 |
| rad26                         | 1.12539e-05 | 0.999929 | 1.12541e-05 | 0.999929 |
| rad1                          | 1.10079e-05 | 0.999940 | 1.10080e-05 | 0.999940 |
| rad59                         | 1.08994e-05 | 0.999950 | 1.08995e-05 | 0.999950 |
| rad51                         | 7.86202e-06 | 0.999958 | 7.86214e-06 | 0.999958 |
| rad60syn                      | 7.67597e-06 | 0.999966 | 7.67609e-06 | 0.999966 |
| rad60anti                     | 4.87219e-06 | 0.999971 | 4.87227e-06 | 0.999971 |
| rad54                         | 4.68136e-06 | 0.999976 | 4.68143e-06 | 0.999976 |
| rad10                         | 3.10144e-06 | 0.999979 | 3.10149e-06 | 0.999979 |
| rad70                         | 2.82525e-06 | 0.999981 | 2.82530e-06 | 0.999981 |
| rad43                         | 2.59545e-06 | 0.999984 | 2.59549e-06 | 0.999984 |
| rad11                         | 2.47503e-06 | 0.999987 | 2.47508e-06 | 0.999987 |
| rad52                         | 2.17852e-06 | 0.999989 | 2.17855e-06 | 0.999989 |
| rad58                         | 1.54633e-06 | 0.999990 | 1.54636e-06 | 0.999990 |
| rad7                          | 1.52584e-06 | 0.999992 | 1.52586e-06 | 0.999992 |
| rad61                         | 1.31064e-06 | 0.999993 | 1.31066e-06 | 0.999993 |
| rad22                         | 1.22187e-06 | 0.999994 | 1.22190e-06 | 0.999994 |
| rad28                         | 1.21368e-06 | 0.999996 | 1.21371e-06 | 0.999996 |
| rad34                         | 7.96061e-07 | 0.999996 | 7.96073e-07 | 0.999996 |
| PAH8+H                        | 4.49491e-07 | 0.999997 | 4.49498e-07 | 0.999997 |
| rad55                         | 3.74427e-07 | 0.999997 | 3.74433e-07 | 0.999997 |
| rad71                         | 3.33282e-07 | 0.999997 | 3.33288e-07 | 0.999997 |
| rad21                         | 2.70254e-07 | 0.999998 | 2.70259e-07 | 0.999998 |
| rad3                          | 2.55127e-07 | 0.999998 | 2.55131e-07 | 0.999998 |
| rad41                         | 2.43631e-07 | 0.999998 | 2.43635e-07 | 0.999998 |
| rad8                          | 2.35146e-07 | 0.999998 | 2.35150e-07 | 0.999998 |
| rad73                         | 2.30995e-07 | 0.999999 | 2.30999e-07 | 0.999999 |
| rad65                         | 2.23152e-07 | 0.999999 | 2.23155e-07 | 0.999999 |
| rad4                          | 2.03360e-07 | 0.999999 | 2.03363e-07 | 0.999999 |



|           |             |          |             |          |
|-----------|-------------|----------|-------------|----------|
| rad20     | 1.75401e-07 | 0.999999 | 1.75404e-07 | 0.999999 |
| rad56     | 1.60459e-07 | 0.999999 | 1.60461e-07 | 0.999999 |
| rad62     | 1.44414e-07 | 1.000000 | 1.44416e-07 | 1.000000 |
| rad53     | 1.36981e-07 | 1.000000 | 1.36983e-07 | 1.000000 |
| rad24     | 1.09944e-07 | 1.000000 | 1.09946e-07 | 1.000000 |
| rad47     | 1.00072e-07 | 1.000000 | 1.00073e-07 | 1.000000 |
| rad13     | 8.57140e-08 | 1.000000 | 8.57153e-08 | 1.000000 |
| rad68syn  | 7.68457e-08 | 1.000000 | 7.68469e-08 | 1.000000 |
| rad40syn  | 6.53269e-08 | 1.000000 | 6.53279e-08 | 1.000000 |
| rad64     | 5.49387e-08 | 1.000000 | 5.49396e-08 | 1.000000 |
| rad40anti | 5.25312e-08 | 1.000000 | 5.25319e-08 | 1.000000 |
| rad68anti | 4.98758e-08 | 1.000000 | 4.98767e-08 | 1.000000 |
| rad18     | 4.02351e-08 | 1.000000 | 4.02357e-08 | 1.000000 |
| rad31     | 2.75823e-08 | 1.000000 | 2.75828e-08 | 1.000000 |
| rad42     | 1.43038e-08 | 1.000000 | 1.43040e-08 | 1.000000 |
| rad72     | 1.18550e-08 | 1.000000 | 1.18552e-08 | 1.000000 |
| rad5      | 5.51044e-09 | 1.000000 | 5.51053e-09 | 1.000000 |
| rad33     | 5.10729e-09 | 1.000000 | 5.10738e-09 | 1.000000 |
| rad27     | 2.83702e-09 | 1.000000 | 2.83707e-09 | 1.000000 |
| rad25     | 1.88885e-09 | 1.000000 | 1.88888e-09 | 1.000000 |
| rad14     | 4.03275e-10 | 1.000000 | 4.03282e-10 | 1.000000 |

1000000.00 Pa, 1000.00000 K

| Rate constant             | True (fraction)       | Effective (fraction)  |
|---------------------------|-----------------------|-----------------------|
| Total                     | 2.07591e-12 (1.00 )   | 2.07585e-12 (1.00 )   |
| Formation of rad19        | 1.74189e-12 (0.839 )  | 1.74183e-12 (0.839 )  |
| H-abstraction to cyc2enyl | 2.68753e-13 (0.129 )  | 2.68753e-13 (0.129 )  |
| H-abstraction to cyclenyl | 6.52627e-14 (0.0314 ) | 6.52606e-14 (0.0314 ) |

| species                       | PYtrue      | Cumul    | PYeffective | Cumul    |
|-------------------------------|-------------|----------|-------------|----------|
| Indene+H                      | 0.294891    | 0.294891 | 0.294900    | 0.294900 |
| rad9                          | 0.262505    | 0.557397 | 0.262513    | 0.557413 |
| PhCHCCH2+H                    | 0.231570    | 0.788967 | 0.231577    | 0.788990 |
| Benzene+cycloprop-2-enylidene | 0.129463    | 0.918430 | 0.129467    | 0.918457 |
| Benzene+cycloprop-1-enylidene | 0.0314382   | 0.949868 | 0.0314380   | 0.949895 |
| Ph+MeAc                       | 0.00835322  | 0.958221 | 0.00835346  | 0.958249 |
| Ph+Allene                     | 0.00811803  | 0.966339 | 0.00811825  | 0.966367 |
| C2H2+PhCH2                    | 0.00809996  | 0.974439 | 0.00810019  | 0.974467 |
| PhCH2CCH+H                    | 0.00704543  | 0.981485 | 0.00704562  | 0.981513 |
| rad67                         | 0.00339951  | 0.984884 | 0.00339961  | 0.984912 |
| PhCCCH3+H                     | 0.00291623  | 0.987800 | 0.00291631  | 0.987829 |
| PhcycC3H3_B+H                 | 0.00266920  | 0.990470 | 0.00266928  | 0.990498 |
| PhcycC3H3_A+H                 | 0.00231373  | 0.992783 | 0.00231380  | 0.992812 |
| PhCCH+CH3                     | 0.00218830  | 0.994972 | 0.00218836  | 0.995000 |
| rad35                         | 0.00123102  | 0.996203 | 0.00123105  | 0.996231 |
| rad12                         | 0.000719562 | 0.996922 | 0.000719582 | 0.996951 |
| PAH10+CH3                     | 0.000596739 | 0.997519 | 0.000596756 | 0.997547 |
| rad19anti                     | 0.000372600 | 0.997892 | 0.000372611 | 0.997920 |
| rad45                         | 0.000348626 | 0.998240 | 0.000348636 | 0.998269 |
| rad6                          | 0.000262477 | 0.998503 | 0.000262484 | 0.998531 |
| rad15                         | 0.000260985 | 0.998764 | 0.000260992 | 0.998792 |
| rad37                         | 0.000227012 | 0.998991 | 0.000227019 | 0.999019 |
| PAH7+H                        | 0.000190558 | 0.999181 | 0.000190564 | 0.999210 |
| PAH3+H                        | 0.000129977 | 0.999311 | 0.000129981 | 0.999340 |
| PAH9+H                        | 0.000127902 | 0.999439 | 0.000127906 | 0.999468 |
| rad38                         | 0.000107308 | 0.999546 | 0.000107311 | 0.999575 |
| rad23                         | 0.000100205 | 0.999647 | 0.000100208 | 0.999675 |
| rad30                         | 5.75065e-05 | 0.999704 | 5.75081e-05 | 0.999733 |
| rad2                          | 3.53751e-05 | 0.999740 | 3.53761e-05 | 0.999768 |
| rad36                         | 3.48484e-05 | 0.999774 | 3.48494e-05 | 0.999803 |
| rad39                         | 3.08469e-05 | 0.999805 | 3.08477e-05 | 0.999834 |
| Phenyl+cycC3H4                | 2.73676e-05 | 0.999833 | 0.000000    | 0.999834 |
| rad50                         | 2.52592e-05 | 0.999858 | 2.52600e-05 | 0.999859 |
| rad46                         | 2.14898e-05 | 0.999879 | 2.14904e-05 | 0.999880 |
| rad19syn                      | 1.42676e-05 | 0.999894 | 1.42681e-05 | 0.999895 |
| PAH1+H                        | 1.34672e-05 | 0.999907 | 1.34676e-05 | 0.999908 |
| rad59                         | 1.16568e-05 | 0.999919 | 1.16571e-05 | 0.999920 |
| rad1                          | 1.08213e-05 | 0.999930 | 1.08216e-05 | 0.999931 |
| rad51                         | 8.45837e-06 | 0.999938 | 8.45858e-06 | 0.999939 |
| rad26                         | 8.17453e-06 | 0.999946 | 8.17476e-06 | 0.999947 |
| rad60syn                      | 8.13046e-06 | 0.999954 | 8.13069e-06 | 0.999955 |
| rad60anti                     | 5.16596e-06 | 0.999959 | 5.16611e-06 | 0.999961 |
| rad54                         | 4.92209e-06 | 0.999964 | 4.92222e-06 | 0.999965 |
| rad8                          | 4.43837e-06 | 0.999969 | 4.43850e-06 | 0.999970 |
| rad11                         | 3.15723e-06 | 0.999972 | 3.15733e-06 | 0.999973 |
| rad70                         | 3.01418e-06 | 0.999975 | 3.01426e-06 | 0.999976 |
| rad43                         | 2.73721e-06 | 0.999978 | 2.73728e-06 | 0.999979 |

|           |             |          |             |          |
|-----------|-------------|----------|-------------|----------|
| rad10     | 2.73229e-06 | 0.999980 | 2.73236e-06 | 0.999982 |
| rad52     | 2.33778e-06 | 0.999983 | 2.33785e-06 | 0.999984 |
| rad22     | 2.32867e-06 | 0.999985 | 2.32873e-06 | 0.999986 |
| rad21     | 2.06291e-06 | 0.999987 | 2.06297e-06 | 0.999988 |
| rad58     | 1.68562e-06 | 0.999989 | 1.68566e-06 | 0.999990 |
| rad7      | 1.47815e-06 | 0.999990 | 1.47818e-06 | 0.999991 |
| rad61     | 1.42335e-06 | 0.999992 | 1.42339e-06 | 0.999993 |
| rad20     | 9.59115e-07 | 0.999993 | 9.59145e-07 | 0.999994 |
| rad28     | 9.16254e-07 | 0.999994 | 9.16284e-07 | 0.999995 |
| rad34     | 8.55470e-07 | 0.999995 | 8.55491e-07 | 0.999996 |
| rad24     | 7.22117e-07 | 0.999995 | 7.22138e-07 | 0.999996 |
| PAH8+H    | 4.99229e-07 | 0.999996 | 4.99243e-07 | 0.999997 |
| rad55     | 3.95944e-07 | 0.999996 | 3.95955e-07 | 0.999997 |
| rad71     | 3.64210e-07 | 0.999996 | 3.64220e-07 | 0.999998 |
| rad41     | 2.61372e-07 | 0.999997 | 2.61379e-07 | 0.999998 |
| rad73     | 2.51650e-07 | 0.999997 | 2.51657e-07 | 0.999998 |
| rad65     | 2.40722e-07 | 0.999997 | 2.40729e-07 | 0.999998 |
| rad3      | 2.38476e-07 | 0.999997 | 2.38483e-07 | 0.999999 |
| rad13     | 2.26549e-07 | 0.999998 | 2.26556e-07 | 0.999999 |
| rad4      | 1.86713e-07 | 0.999998 | 1.86718e-07 | 0.999999 |
| rad56     | 1.74950e-07 | 0.999998 | 1.74956e-07 | 0.999999 |
| rad62     | 1.51909e-07 | 0.999998 | 1.51913e-07 | 0.999999 |
| rad53     | 1.47955e-07 | 0.999998 | 1.47959e-07 | 0.999999 |
| rad18     | 1.19968e-07 | 0.999998 | 1.19971e-07 | 1.000000 |
| rad47     | 1.08186e-07 | 0.999999 | 1.08189e-07 | 1.000000 |
| rad68syn  | 8.43017e-08 | 0.999999 | 8.43047e-08 | 1.000000 |
| rad40syn  | 7.21010e-08 | 0.999999 | 7.21030e-08 | 1.000000 |
| rad64     | 5.94470e-08 | 0.999999 | 5.94487e-08 | 1.000000 |
| rad40anti | 5.79991e-08 | 0.999999 | 5.80007e-08 | 1.000000 |
| rad68anti | 5.47008e-08 | 0.999999 | 5.47025e-08 | 1.000000 |
| rad33     | 2.97806e-08 | 0.999999 | 2.97815e-08 | 1.000000 |
| rad31     | 2.93220e-08 | 0.999999 | 2.93228e-08 | 1.000000 |
| rad42     | 1.52808e-08 | 0.999999 | 1.52813e-08 | 1.000000 |
| rad72     | 1.30324e-08 | 0.999999 | 1.30327e-08 | 1.000000 |
| rad27     | 7.88797e-09 | 0.999999 | 7.88820e-09 | 1.000000 |
| rad25     | 7.19622e-09 | 0.999999 | 7.19642e-09 | 1.000000 |
| rad5      | 4.13617e-09 | 0.999999 | 4.13629e-09 | 1.000000 |
| rad14     | 8.03752e-10 | 0.999999 | 8.03774e-10 | 1.000000 |

1000000.00 Pa, 1100.00000 K

| Rate constant             | True (fraction)       | Effective (fraction)  |
|---------------------------|-----------------------|-----------------------|
| Total                     | 2.81236e-12 (1.00 )   | 2.81220e-12 (1.00 )   |
| Formation of rad19        | 2.25993e-12 (0.804 )  | 2.25977e-12 (0.804 )  |
| H-abstraction to cyc2enyl | 4.30538e-13 (0.153 )  | 4.30538e-13 (0.153 )  |
| H-abstraction to cyc1enyl | 1.21896e-13 (0.0433 ) | 1.21887e-13 (0.0433 ) |

| species                       | PYtrue      | Cumul    | PYeffective | Cumul    |
|-------------------------------|-------------|----------|-------------|----------|
| Indene+H                      | 0.273107    | 0.273107 | 0.273123    | 0.273123 |
| rad9                          | 0.257406    | 0.530513 | 0.257421    | 0.530545 |
| PhCHCCH2+H                    | 0.224238    | 0.754750 | 0.224251    | 0.754796 |
| Benzene+cycloprop-2-enylidene | 0.153088    | 0.907838 | 0.153097    | 0.907893 |
| Benzene+cycloprop-1-enylidene | 0.0433429   | 0.951181 | 0.0433424   | 0.951235 |
| Ph+MeAc                       | 0.00810175  | 0.959282 | 0.00810222  | 0.959337 |
| Ph+Allene                     | 0.00788844  | 0.967171 | 0.00788891  | 0.967226 |
| C2H2+PhCH2                    | 0.00785669  | 0.975028 | 0.00785716  | 0.975083 |
| PhCH2CCH+H                    | 0.00688178  | 0.981909 | 0.00688220  | 0.981966 |
| rad67                         | 0.00330270  | 0.985212 | 0.00330290  | 0.985269 |
| PhCCCH3+H                     | 0.00281395  | 0.988026 | 0.00281412  | 0.988083 |
| PhcycC3H3_B+H                 | 0.00237504  | 0.990401 | 0.00237518  | 0.990458 |
| PhCCH+CH3                     | 0.00212990  | 0.992531 | 0.00213002  | 0.992588 |
| PhcycC3H3_A+H                 | 0.00208294  | 0.994614 | 0.00208306  | 0.994671 |
| rad35                         | 0.00119645  | 0.995810 | 0.00119653  | 0.995867 |
| rad12                         | 0.00118943  | 0.997000 | 0.00118950  | 0.997057 |
| PAH10+CH3                     | 0.000586527 | 0.997586 | 0.000586562 | 0.997643 |
| rad45                         | 0.000326883 | 0.997913 | 0.000326903 | 0.997970 |
| rad15                         | 0.000312973 | 0.998226 | 0.000312993 | 0.998283 |
| rad19anti                     | 0.000289109 | 0.998515 | 0.000289126 | 0.998573 |
| rad6                          | 0.000222499 | 0.998738 | 0.000222512 | 0.998795 |
| rad37                         | 0.000219099 | 0.998957 | 0.000219112 | 0.999014 |
| PAH7+H                        | 0.000185158 | 0.999142 | 0.000185170 | 0.999199 |
| PAH3+H                        | 0.000128945 | 0.999271 | 0.000128952 | 0.999328 |
| PAH9+H                        | 0.000126478 | 0.999397 | 0.000126485 | 0.999455 |
| rad38                         | 0.000105495 | 0.999503 | 0.000105502 | 0.999560 |
| rad23                         | 8.85429e-05 | 0.999592 | 8.85484e-05 | 0.999649 |
| Phenyl+cycC3H4                | 5.69591e-05 | 0.999648 | 0.000000    | 0.999649 |
| rad30                         | 5.60704e-05 | 0.999705 | 5.60738e-05 | 0.999705 |
| rad2                          | 3.24686e-05 | 0.999737 | 3.24705e-05 | 0.999737 |

|           |             |          |             |          |
|-----------|-------------|----------|-------------|----------|
| rad36     | 3.20983e-05 | 0.999769 | 3.21002e-05 | 0.999769 |
| rad39     | 3.00590e-05 | 0.999799 | 3.00609e-05 | 0.999799 |
| rad50     | 2.51261e-05 | 0.999824 | 2.51276e-05 | 0.999825 |
| rad46     | 2.12856e-05 | 0.999846 | 2.12869e-05 | 0.999846 |
| rad8      | 2.12498e-05 | 0.999867 | 2.12511e-05 | 0.999867 |
| PAH1+H    | 1.33657e-05 | 0.999880 | 1.33665e-05 | 0.999881 |
| rad19syn  | 1.28577e-05 | 0.999893 | 1.28584e-05 | 0.999893 |
| rad21     | 1.16255e-05 | 0.999905 | 1.16262e-05 | 0.999905 |
| rad59     | 1.15360e-05 | 0.999916 | 1.15367e-05 | 0.999917 |
| rad1      | 9.77430e-06 | 0.999926 | 9.77483e-06 | 0.999926 |
| rad51     | 8.43451e-06 | 0.999934 | 8.43498e-06 | 0.999935 |
| rad60syn  | 8.00321e-06 | 0.999942 | 8.00368e-06 | 0.999943 |
| rad26     | 6.78012e-06 | 0.999949 | 6.78053e-06 | 0.999950 |
| rad11     | 6.63056e-06 | 0.999956 | 6.63095e-06 | 0.999956 |
| rad22     | 5.79931e-06 | 0.999962 | 5.79966e-06 | 0.999962 |
| rad60anti | 5.08798e-06 | 0.999967 | 5.08829e-06 | 0.999967 |
| rad54     | 4.80878e-06 | 0.999972 | 4.80906e-06 | 0.999972 |
| rad20     | 3.79892e-06 | 0.999975 | 3.79915e-06 | 0.999976 |
| rad10     | 3.27743e-06 | 0.999979 | 3.27762e-06 | 0.999979 |
| rad70     | 2.96872e-06 | 0.999982 | 2.96890e-06 | 0.999982 |
| rad43     | 2.68222e-06 | 0.999984 | 2.68238e-06 | 0.999985 |
| rad52     | 2.32800e-06 | 0.999987 | 2.32815e-06 | 0.999987 |
| rad7      | 2.09897e-06 | 0.999989 | 2.09909e-06 | 0.999989 |
| rad24     | 1.76653e-06 | 0.999990 | 1.76664e-06 | 0.999991 |
| rad58     | 1.68627e-06 | 0.999992 | 1.68637e-06 | 0.999992 |
| rad61     | 1.42242e-06 | 0.999994 | 1.42251e-06 | 0.999994 |
| rad34     | 8.45885e-07 | 0.999994 | 8.45932e-07 | 0.999995 |
| rad28     | 7.61687e-07 | 0.999995 | 7.61733e-07 | 0.999996 |
| rad13     | 7.39027e-07 | 0.999996 | 7.39071e-07 | 0.999996 |
| PAH8+H    | 5.03160e-07 | 0.999996 | 5.03190e-07 | 0.999997 |
| rad18     | 4.41140e-07 | 0.999997 | 4.41166e-07 | 0.999997 |
| rad55     | 3.88103e-07 | 0.999997 | 3.88126e-07 | 0.999998 |
| rad71     | 3.66714e-07 | 0.999998 | 3.66736e-07 | 0.999998 |
| rad41     | 2.58545e-07 | 0.999998 | 2.58561e-07 | 0.999998 |
| rad73     | 2.52926e-07 | 0.999998 | 2.52941e-07 | 0.999998 |
| rad65     | 2.40282e-07 | 0.999998 | 2.40297e-07 | 0.999999 |
| rad3      | 2.12780e-07 | 0.999999 | 2.12793e-07 | 0.999999 |
| rad56     | 1.74579e-07 | 0.999999 | 1.74589e-07 | 0.999999 |
| rad4      | 1.63993e-07 | 0.999999 | 1.64004e-07 | 0.999999 |
| rad62     | 1.48671e-07 | 0.999999 | 1.48680e-07 | 0.999999 |
| rad53     | 1.46827e-07 | 0.999999 | 1.46835e-07 | 1.000000 |
| rad33     | 1.32784e-07 | 0.999999 | 1.32792e-07 | 1.000000 |
| rad47     | 1.03376e-07 | 0.999999 | 1.03382e-07 | 1.000000 |
| rad68syn  | 8.43185e-08 | 1.000000 | 8.43232e-08 | 1.000000 |
| rad40syn  | 7.24235e-08 | 1.000000 | 7.24278e-08 | 1.000000 |
| rad64     | 5.92366e-08 | 1.000000 | 5.92402e-08 | 1.000000 |
| rad40anti | 5.82816e-08 | 1.000000 | 5.82851e-08 | 1.000000 |
| rad68anti | 5.47035e-08 | 1.000000 | 5.47067e-08 | 1.000000 |
| rad25     | 3.96807e-08 | 1.000000 | 3.96830e-08 | 1.000000 |
| rad31     | 2.73713e-08 | 1.000000 | 2.73730e-08 | 1.000000 |
| rad27     | 2.67438e-08 | 1.000000 | 2.67454e-08 | 1.000000 |
| rad42     | 1.50821e-08 | 1.000000 | 1.50830e-08 | 1.000000 |
| rad72     | 1.31665e-08 | 1.000000 | 1.31673e-08 | 1.000000 |
| rad5      | 3.76587e-09 | 1.000000 | 3.76610e-09 | 1.000000 |
| rad14     | 1.94408e-09 | 1.000000 | 1.94420e-09 | 1.000000 |

1000000.00 Pa, 1200.00000 K

=====

| Rate constant             | True (fraction)       | Effective (fraction)  |
|---------------------------|-----------------------|-----------------------|
| Total                     | 3.72623e-12 (1.00 )   | 3.72573e-12 (1.00 )   |
| Formation of rad19        | 2.86288e-12 (0.768 )  | 2.86242e-12 (0.768 )  |
| H-abstraction to cyc2enyl | 6.53266e-13 (0.175 )  | 6.53266e-13 (0.175 )  |
| H-abstraction to cyclenyl | 2.10085e-13 (0.0564 ) | 2.10051e-13 (0.0564 ) |

| species                       | PYtrue     | Cumul    | PYeffective | Cumul    |
|-------------------------------|------------|----------|-------------|----------|
| Indene+H                      | 0.256737   | 0.256737 | 0.256772    | 0.256772 |
| rad9                          | 0.248975   | 0.505711 | 0.249008    | 0.505780 |
| PhCHCCH2+H                    | 0.215288   | 0.720999 | 0.215317    | 0.721097 |
| Benzene+cycloprop-2-enylidene | 0.175315   | 0.896315 | 0.175339    | 0.896436 |
| Benzene+cycloprop-1-enylidene | 0.0563801  | 0.952695 | 0.0563784   | 0.952814 |
| Ph+MeAc                       | 0.00778454 | 0.960479 | 0.00778555  | 0.960600 |
| Ph+Allene                     | 0.00758193 | 0.968061 | 0.00758296  | 0.968183 |
| C2H2+PhCH2                    | 0.00754054 | 0.975602 | 0.00754156  | 0.975724 |
| PhCH2CCH+H                    | 0.00662432 | 0.982226 | 0.00662522  | 0.982350 |
| rad67                         | 0.00317538 | 0.985401 | 0.00317581  | 0.985525 |
| PhCCCH3+H                     | 0.00269703 | 0.988098 | 0.00269740  | 0.988223 |
| PhcycC3H3_B+H                 | 0.00218565 | 0.990284 | 0.00218595  | 0.990409 |
| PhCCH+CH3                     | 0.00205126 | 0.992335 | 0.00205154  | 0.992460 |

|                |             |          |             |          |
|----------------|-------------|----------|-------------|----------|
| PhcycC3H3_A+H  | 0.00196187  | 0.994297 | 0.00196212  | 0.994422 |
| rad12          | 0.00138481  | 0.995682 | 0.00138500  | 0.995807 |
| rad35          | 0.00115063  | 0.996833 | 0.00115078  | 0.996958 |
| PAH10+CH3      | 0.000567023 | 0.997400 | 0.000567100 | 0.997525 |
| rad15          | 0.000526842 | 0.997927 | 0.000526913 | 0.998052 |
| rad45          | 0.000300328 | 0.998227 | 0.000300369 | 0.998353 |
| rad19anti      | 0.000225368 | 0.998452 | 0.000225399 | 0.998578 |
| rad37          | 0.000209981 | 0.998662 | 0.000210009 | 0.998788 |
| rad6           | 0.000203973 | 0.998866 | 0.000204001 | 0.998992 |
| PAH7+H         | 0.000177995 | 0.999044 | 0.000178019 | 0.999170 |
| Phenyl+cycC3H4 | 0.000125720 | 0.999170 | 0.000000    | 0.999170 |
| PAH3+H         | 0.000125039 | 0.999295 | 0.000125055 | 0.999295 |
| PAH9+H         | 0.000123162 | 0.999418 | 0.000123179 | 0.999418 |
| rad38          | 0.000102252 | 0.999520 | 0.000102266 | 0.999521 |
| rad23          | 7.80091e-05 | 0.999598 | 7.80191e-05 | 0.999599 |
| rad30          | 5.39451e-05 | 0.999652 | 5.39523e-05 | 0.999653 |
| rad8           | 4.43365e-05 | 0.999697 | 4.43425e-05 | 0.999697 |
| rad2           | 2.96088e-05 | 0.999726 | 2.96128e-05 | 0.999727 |
| rad36          | 2.92450e-05 | 0.999755 | 2.92489e-05 | 0.999756 |
| rad39          | 2.90032e-05 | 0.999785 | 2.90071e-05 | 0.999785 |
| rad21          | 2.85205e-05 | 0.999813 | 2.85243e-05 | 0.999813 |
| rad50          | 2.45452e-05 | 0.999838 | 2.45486e-05 | 0.999838 |
| rad46          | 2.07485e-05 | 0.999858 | 2.07512e-05 | 0.999859 |
| rad11          | 1.72080e-05 | 0.999876 | 1.72103e-05 | 0.999876 |
| PAH1+H         | 1.29784e-05 | 0.999889 | 1.29801e-05 | 0.999889 |
| rad19syn       | 1.14112e-05 | 0.999900 | 1.14127e-05 | 0.999900 |
| rad59          | 1.11737e-05 | 0.999911 | 1.11751e-05 | 0.999911 |
| rad22          | 8.96635e-06 | 0.999920 | 8.96755e-06 | 0.999920 |
| rad1           | 8.77496e-06 | 0.999929 | 8.77617e-06 | 0.999929 |
| rad51          | 8.25067e-06 | 0.999937 | 8.25174e-06 | 0.999937 |
| rad60syn       | 7.73260e-06 | 0.999945 | 7.73369e-06 | 0.999945 |
| rad20          | 7.33972e-06 | 0.999952 | 7.34071e-06 | 0.999952 |
| rad26          | 6.43847e-06 | 0.999959 | 6.43934e-06 | 0.999959 |
| rad10          | 5.62527e-06 | 0.999964 | 5.62603e-06 | 0.999964 |
| rad60anti      | 4.91723e-06 | 0.999969 | 4.91789e-06 | 0.999969 |
| rad54          | 4.63116e-06 | 0.999974 | 4.63178e-06 | 0.999974 |
| rad7           | 4.14258e-06 | 0.999978 | 4.14314e-06 | 0.999978 |
| rad70          | 2.85502e-06 | 0.999981 | 2.85541e-06 | 0.999981 |
| rad43          | 2.57618e-06 | 0.999983 | 2.57652e-06 | 0.999984 |
| rad24          | 2.42810e-06 | 0.999986 | 2.42843e-06 | 0.999986 |
| rad52          | 2.27566e-06 | 0.999988 | 2.27597e-06 | 0.999988 |
| rad13          | 2.12795e-06 | 0.999990 | 2.12824e-06 | 0.999990 |
| rad58          | 1.64171e-06 | 0.999992 | 1.64193e-06 | 0.999992 |
| rad61          | 1.38639e-06 | 0.999993 | 1.38658e-06 | 0.999993 |
| rad18          | 1.10647e-06 | 0.999994 | 1.10663e-06 | 0.999995 |
| rad34          | 8.14918e-07 | 0.999995 | 8.15025e-07 | 0.999995 |
| rad28          | 6.91583e-07 | 0.999996 | 6.91676e-07 | 0.999996 |
| PAH8+H         | 4.89571e-07 | 0.999996 | 4.89637e-07 | 0.999997 |
| rad55          | 3.74349e-07 | 0.999997 | 3.74400e-07 | 0.999997 |
| rad71          | 3.60885e-07 | 0.999997 | 3.60933e-07 | 0.999997 |
| rad33          | 3.19031e-07 | 0.999997 | 3.19074e-07 | 0.999998 |
| rad41          | 2.49428e-07 | 0.999998 | 2.49462e-07 | 0.999998 |
| rad73          | 2.48650e-07 | 0.999998 | 2.48684e-07 | 0.999998 |
| rad65          | 2.35064e-07 | 0.999998 | 2.35096e-07 | 0.999998 |
| rad3           | 1.91175e-07 | 0.999998 | 1.91201e-07 | 0.999999 |
| rad25          | 1.76252e-07 | 0.999998 | 1.76276e-07 | 0.999999 |
| rad56          | 1.69865e-07 | 0.999999 | 1.69888e-07 | 0.999999 |
| rad4           | 1.46186e-07 | 0.999999 | 1.46206e-07 | 0.999999 |
| rad62          | 1.42724e-07 | 0.999999 | 1.42744e-07 | 0.999999 |
| rad53          | 1.42473e-07 | 0.999999 | 1.42492e-07 | 0.999999 |
| rad47          | 9.56632e-08 | 0.999999 | 9.56765e-08 | 0.999999 |
| rad27          | 8.86670e-08 | 0.999999 | 8.86790e-08 | 1.000000 |
| rad68syn       | 8.16777e-08 | 0.999999 | 8.16892e-08 | 1.000000 |
| rad40syn       | 7.03603e-08 | 0.999999 | 7.03699e-08 | 1.000000 |
| rad64          | 5.76758e-08 | 0.999999 | 5.76836e-08 | 1.000000 |
| rad40anti      | 5.66428e-08 | 1.000000 | 5.66504e-08 | 1.000000 |
| rad68anti      | 5.29864e-08 | 1.000000 | 5.29935e-08 | 1.000000 |
| rad31          | 2.49107e-08 | 1.000000 | 2.49140e-08 | 1.000000 |
| rad42          | 1.45326e-08 | 1.000000 | 1.45345e-08 | 1.000000 |
| rad72          | 1.29815e-08 | 1.000000 | 1.29833e-08 | 1.000000 |
| rad14          | 5.05036e-09 | 1.000000 | 5.05104e-09 | 1.000000 |
| rad5           | 4.23179e-09 | 1.000000 | 4.23237e-09 | 1.000000 |

1000000.00 Pa, 1300.00000 K

| Rate constant             | True (fraction)     | Effective (fraction) |
|---------------------------|---------------------|----------------------|
| Total                     | 4.84401e-12 (1.00)  | 4.84259e-12 (1.00)   |
| Formation of rad19        | 3.55537e-12 (0.734) | 3.55408e-12 (0.734)  |
| H-abstraction to cyc2enyl | 9.48893e-13 (0.196) | 9.48893e-13 (0.196)  |

H-abstraction to cyclenyl | 3.39740e-13 (0.0701 ) 3.39617e-13 (0.0701 )

| species                       | PYtrue      | Cumul    | PYeffective | Cumul    |
|-------------------------------|-------------|----------|-------------|----------|
| Indene+H                      | 0.245625    | 0.245625 | 0.245697    | 0.245697 |
| rad9                          | 0.235071    | 0.480696 | 0.235140    | 0.480837 |
| PhCHCCH2+H                    | 0.206843    | 0.687540 | 0.206904    | 0.687741 |
| Benzene+cycloprop-2-enylidene | 0.195890    | 0.883430 | 0.195948    | 0.883689 |
| Benzene+cycloprop-1-enylidene | 0.0701362   | 0.953566 | 0.0701312   | 0.953820 |
| Ph+MeAc                       | 0.00747897  | 0.961045 | 0.00748115  | 0.961301 |
| Ph+Allene                     | 0.00728179  | 0.968327 | 0.00728393  | 0.968585 |
| C2H2+PhCH2                    | 0.00723710  | 0.975564 | 0.00723922  | 0.975825 |
| PhCH2CCH+H                    | 0.00634844  | 0.981912 | 0.00635030  | 0.982175 |
| rad67                         | 0.00305011  | 0.984962 | 0.00305100  | 0.985226 |
| PhCCCH3+H                     | 0.00258996  | 0.987552 | 0.00259071  | 0.987817 |
| PhcycC3H3_B+H                 | 0.00217634  | 0.989729 | 0.00217698  | 0.989993 |
| PhcycC3H3_A+H                 | 0.00201226  | 0.991741 | 0.00201285  | 0.992006 |
| PhCCH+CH3                     | 0.00197274  | 0.993714 | 0.00197332  | 0.993980 |
| rad12                         | 0.00140712  | 0.995121 | 0.00140753  | 0.995387 |
| rad35                         | 0.00110539  | 0.996226 | 0.00110571  | 0.996493 |
| rad15                         | 0.00106380  | 0.997290 | 0.00106411  | 0.997557 |
| PAH10+CH3                     | 0.000544438 | 0.997834 | 0.000544597 | 0.998102 |
| rad45                         | 0.000275286 | 0.998110 | 0.000275367 | 0.998377 |
| Phenyl+cycC3H4                | 0.000267318 | 0.998377 | 0.000000    | 0.998377 |
| rad37                         | 0.000201358 | 0.998578 | 0.000201417 | 0.998578 |
| rad6                          | 0.000199344 | 0.998778 | 0.000199402 | 0.998778 |
| rad19anti                     | 0.000176854 | 0.998954 | 0.000176906 | 0.998955 |
| PAH7+H                        | 0.000171131 | 0.999126 | 0.000171181 | 0.999126 |
| PAH3+H                        | 0.000119967 | 0.999246 | 0.000120002 | 0.999246 |
| PAH9+H                        | 0.000119505 | 0.999365 | 0.000119540 | 0.999365 |
| rad38                         | 9.87217e-05 | 0.999464 | 9.87506e-05 | 0.999464 |
| rad23                         | 6.90710e-05 | 0.999533 | 6.90912e-05 | 0.999533 |
| rad8                          | 6.31782e-05 | 0.999596 | 6.31967e-05 | 0.999596 |
| rad30                         | 5.17119e-05 | 0.999648 | 5.17271e-05 | 0.999648 |
| rad11                         | 4.48818e-05 | 0.999693 | 4.48949e-05 | 0.999693 |
| rad21                         | 4.10227e-05 | 0.999734 | 4.10348e-05 | 0.999734 |
| rad39                         | 2.79915e-05 | 0.999762 | 2.79997e-05 | 0.999762 |
| rad2                          | 2.72969e-05 | 0.999789 | 2.73050e-05 | 0.999789 |
| rad36                         | 2.67085e-05 | 0.999816 | 2.67163e-05 | 0.999816 |
| rad50                         | 2.38478e-05 | 0.999840 | 2.38548e-05 | 0.999840 |
| rad46                         | 2.01398e-05 | 0.999860 | 2.01457e-05 | 0.999860 |
| PAH1+H                        | 1.24784e-05 | 0.999872 | 1.24820e-05 | 0.999873 |
| rad10                         | 1.22666e-05 | 0.999884 | 1.22702e-05 | 0.999885 |
| rad59                         | 1.07181e-05 | 0.999895 | 1.07213e-05 | 0.999896 |
| rad22                         | 1.02033e-05 | 0.999905 | 1.02063e-05 | 0.999906 |
| rad19syn                      | 1.00842e-05 | 0.999915 | 1.00872e-05 | 0.999916 |
| rad20                         | 9.43641e-06 | 0.999925 | 9.43918e-06 | 0.999925 |
| rad7                          | 9.09834e-06 | 0.999934 | 9.10106e-06 | 0.999934 |
| rad51                         | 8.02145e-06 | 0.999942 | 8.02381e-06 | 0.999942 |
| rad1                          | 8.01580e-06 | 0.999950 | 8.01809e-06 | 0.999950 |
| rad26                         | 7.63472e-06 | 0.999958 | 7.63696e-06 | 0.999958 |
| rad60syn                      | 7.41482e-06 | 0.999965 | 7.41701e-06 | 0.999966 |
| rad60anti                     | 4.71528e-06 | 0.999970 | 4.71666e-06 | 0.999970 |
| rad54                         | 4.46683e-06 | 0.999974 | 4.46814e-06 | 0.999975 |
| rad13                         | 4.30299e-06 | 0.999979 | 4.30426e-06 | 0.999979 |
| rad70                         | 2.72223e-06 | 0.999981 | 2.72304e-06 | 0.999982 |
| rad24                         | 2.62977e-06 | 0.999984 | 2.63054e-06 | 0.999984 |
| rad43                         | 2.46150e-06 | 0.999986 | 2.46222e-06 | 0.999987 |
| rad18                         | 2.38048e-06 | 0.999989 | 2.38118e-06 | 0.999989 |
| rad52                         | 2.21176e-06 | 0.999991 | 2.21241e-06 | 0.999991 |
| rad58                         | 1.57643e-06 | 0.999993 | 1.57689e-06 | 0.999993 |
| rad61                         | 1.33351e-06 | 0.999994 | 1.33389e-06 | 0.999994 |
| rad34                         | 7.77285e-07 | 0.999995 | 7.77509e-07 | 0.999995 |
| rad28                         | 6.77955e-07 | 0.999995 | 6.78153e-07 | 0.999996 |
| PAH8+H                        | 4.68826e-07 | 0.999996 | 4.68964e-07 | 0.999996 |
| rad33                         | 4.68814e-07 | 0.999996 | 4.68951e-07 | 0.999997 |
| rad25                         | 4.23115e-07 | 0.999997 | 4.23238e-07 | 0.999997 |
| rad55                         | 3.61180e-07 | 0.999997 | 3.61286e-07 | 0.999998 |
| rad71                         | 3.52144e-07 | 0.999997 | 3.52248e-07 | 0.999998 |
| rad73                         | 2.42495e-07 | 0.999998 | 2.42566e-07 | 0.999998 |
| rad41                         | 2.38564e-07 | 0.999998 | 2.38634e-07 | 0.999998 |
| rad65                         | 2.28425e-07 | 0.999998 | 2.28492e-07 | 0.999999 |
| rad27                         | 1.87541e-07 | 0.999998 | 1.87596e-07 | 0.999999 |
| rad3                          | 1.74921e-07 | 0.999998 | 1.74972e-07 | 0.999999 |
| rad56                         | 1.64225e-07 | 0.999999 | 1.64273e-07 | 0.999999 |
| rad53                         | 1.37647e-07 | 0.999999 | 1.37688e-07 | 0.999999 |
| rad62                         | 1.36371e-07 | 0.999999 | 1.36411e-07 | 0.999999 |
| rad4                          | 1.33334e-07 | 0.999999 | 1.33373e-07 | 1.000000 |
| rad47                         | 8.78559e-08 | 0.999999 | 8.78819e-08 | 1.000000 |
| rad68syn                      | 7.80243e-08 | 0.999999 | 7.80474e-08 | 1.000000 |

|           |             |          |             |          |
|-----------|-------------|----------|-------------|----------|
| rad40syn  | 6.73638e-08 | 0.999999 | 6.73835e-08 | 1.000000 |
| rad64     | 5.56483e-08 | 0.999999 | 5.56646e-08 | 1.000000 |
| rad40anti | 5.42528e-08 | 0.999999 | 5.42688e-08 | 1.000000 |
| rad68anti | 5.06151e-08 | 0.999999 | 5.06299e-08 | 1.000000 |
| rad31     | 2.27247e-08 | 0.999999 | 2.27314e-08 | 1.000000 |
| rad42     | 1.38945e-08 | 0.999999 | 1.38986e-08 | 1.000000 |
| rad72     | 1.26790e-08 | 0.999999 | 1.26827e-08 | 1.000000 |
| rad14     | 1.06543e-08 | 0.999999 | 1.06574e-08 | 1.000000 |
| rad5      | 6.59478e-09 | 0.999999 | 6.59671e-09 | 1.000000 |

1000000.00 Pa, 1400.00000 K

| Rate constant             | True (fraction)       | Effective (fraction)  |
|---------------------------|-----------------------|-----------------------|
| Total                     | 6.19360e-12 (1.00 )   | 6.18993e-12 (1.00 )   |
| Formation of rad19        | 4.34185e-12 (0.701 )  | 4.33858e-12 (0.701 )  |
| H-abstraction to cyc2enyl | 1.32990e-12 (0.215 )  | 1.32990e-12 (0.215 )  |
| H-abstraction to cyclenyl | 5.21850e-13 (0.0843 ) | 5.21457e-13 (0.0842 ) |

| species                       | PYtrue      | Cumul    | PYeffective | Cumul    |
|-------------------------------|-------------|----------|-------------|----------|
| Indene+H                      | 0.237090    | 0.237090 | 0.237230    | 0.237230 |
| rad9                          | 0.218100    | 0.455190 | 0.218229    | 0.455460 |
| Benzene+cycloprop-2-enylidene | 0.214721    | 0.669911 | 0.214848    | 0.670308 |
| PhCHCCH2+H                    | 0.199109    | 0.869020 | 0.199226    | 0.869534 |
| Benzene+cycloprop-1-enylidene | 0.0842564   | 0.953276 | 0.0842428   | 0.953777 |
| Ph+MeAc                       | 0.00719312  | 0.960469 | 0.00719742  | 0.960975 |
| Ph+Allene                     | 0.00699514  | 0.967464 | 0.00699928  | 0.967974 |
| C2H2+PhCH2                    | 0.00695559  | 0.974420 | 0.00695971  | 0.974934 |
| PhCH2CCH+H                    | 0.00607362  | 0.980494 | 0.00607722  | 0.981011 |
| rad67                         | 0.00293012  | 0.983424 | 0.00293185  | 0.983943 |
| PhCCCH3+H                     | 0.00249265  | 0.985916 | 0.00249413  | 0.986437 |
| PhcycC3H3_B+H                 | 0.00241806  | 0.988334 | 0.00241949  | 0.988856 |
| PhcycC3H3_A+H                 | 0.00228533  | 0.990620 | 0.00228669  | 0.991143 |
| rad15                         | 0.00211064  | 0.992730 | 0.00211189  | 0.993255 |
| PhCCH+CH3                     | 0.00189700  | 0.994627 | 0.00189812  | 0.995153 |
| rad12                         | 0.00135518  | 0.995983 | 0.00135599  | 0.996509 |
| rad35                         | 0.00106197  | 0.997045 | 0.00106261  | 0.997572 |
| Phenyl+cycC3H4                | 0.000528626 | 0.997573 | 0.000000    | 0.997572 |
| PAH10+CH3                     | 0.000520571 | 0.998094 | 0.000520880 | 0.998092 |
| rad45                         | 0.000252522 | 0.998346 | 0.000252672 | 0.998345 |
| rad6                          | 0.000210793 | 0.998557 | 0.000210917 | 0.998556 |
| rad37                         | 0.000193079 | 0.998750 | 0.000193194 | 0.998749 |
| PAH7+H                        | 0.000164489 | 0.998915 | 0.000164586 | 0.998914 |
| rad19anti                     | 0.000139950 | 0.999055 | 0.000140032 | 0.999054 |
| PAH9+H                        | 0.000115721 | 0.999170 | 0.000115789 | 0.999170 |
| PAH3+H                        | 0.000114470 | 0.999285 | 0.000114538 | 0.999284 |
| rad11                         | 9.51988e-05 | 0.999380 | 9.52549e-05 | 0.999379 |
| rad38                         | 9.50670e-05 | 0.999475 | 9.51231e-05 | 0.999475 |
| rad8                          | 7.44030e-05 | 0.999549 | 7.44470e-05 | 0.999549 |
| rad23                         | 6.59638e-05 | 0.999615 | 6.60028e-05 | 0.999615 |
| rad30                         | 4.94847e-05 | 0.999665 | 4.95140e-05 | 0.999665 |
| rad21                         | 4.62024e-05 | 0.999711 | 4.62298e-05 | 0.999711 |
| rad39                         | 2.69757e-05 | 0.999738 | 2.69916e-05 | 0.999738 |
| rad10                         | 2.69200e-05 | 0.999765 | 2.69360e-05 | 0.999765 |
| rad2                          | 2.53745e-05 | 0.999790 | 2.53895e-05 | 0.999790 |
| rad36                         | 2.44606e-05 | 0.999815 | 2.44751e-05 | 0.999815 |
| rad50                         | 2.30870e-05 | 0.999838 | 2.31007e-05 | 0.999838 |
| rad46                         | 1.94935e-05 | 0.999857 | 1.95050e-05 | 0.999857 |
| rad7                          | 1.79991e-05 | 0.999875 | 1.80098e-05 | 0.999875 |
| PAH1+H                        | 1.19343e-05 | 0.999887 | 1.19415e-05 | 0.999887 |
| rad26                         | 1.16385e-05 | 0.999899 | 1.16454e-05 | 0.999899 |
| rad22                         | 1.13365e-05 | 0.999910 | 1.13432e-05 | 0.999910 |
| rad59                         | 1.02302e-05 | 0.999921 | 1.02363e-05 | 0.999920 |
| rad20                         | 1.01577e-05 | 0.999931 | 1.01637e-05 | 0.999930 |
| rad19syn                      | 8.91792e-06 | 0.999940 | 8.92320e-06 | 0.999939 |
| rad51                         | 7.76712e-06 | 0.999947 | 7.77175e-06 | 0.999947 |
| rad1                          | 7.41387e-06 | 0.999955 | 7.41821e-06 | 0.999955 |
| rad60syn                      | 7.08292e-06 | 0.999962 | 7.08717e-06 | 0.999962 |
| rad13                         | 5.94210e-06 | 0.999968 | 5.94562e-06 | 0.999968 |
| rad18                         | 5.19722e-06 | 0.999973 | 5.20030e-06 | 0.999973 |
| rad60anti                     | 4.50384e-06 | 0.999978 | 4.50651e-06 | 0.999977 |
| rad54                         | 4.32732e-06 | 0.999982 | 4.32989e-06 | 0.999982 |
| rad70                         | 2.59354e-06 | 0.999984 | 2.59509e-06 | 0.999984 |
| rad24                         | 2.58960e-06 | 0.999987 | 2.59114e-06 | 0.999987 |
| rad43                         | 2.35380e-06 | 0.999989 | 2.35519e-06 | 0.999989 |
| rad52                         | 2.14151e-06 | 0.999992 | 2.14278e-06 | 0.999991 |
| rad58                         | 1.50279e-06 | 0.999993 | 1.50368e-06 | 0.999993 |
| rad61                         | 1.27233e-06 | 0.999994 | 1.27308e-06 | 0.999994 |
| rad34                         | 7.40231e-07 | 0.999995 | 7.40671e-07 | 0.999995 |

|           |             |          |             |          |
|-----------|-------------|----------|-------------|----------|
| rad28     | 7.32071e-07 | 0.999996 | 7.32506e-07 | 0.999996 |
| rad25     | 6.23576e-07 | 0.999996 | 6.23945e-07 | 0.999996 |
| rad33     | 5.25814e-07 | 0.999997 | 5.26125e-07 | 0.999997 |
| PAH8+H    | 4.46439e-07 | 0.999997 | 4.46703e-07 | 0.999997 |
| rad55     | 3.49949e-07 | 0.999998 | 3.50157e-07 | 0.999998 |
| rad71     | 3.41697e-07 | 0.999998 | 3.41899e-07 | 0.999998 |
| rad27     | 2.63180e-07 | 0.999998 | 2.63336e-07 | 0.999998 |
| rad73     | 2.35244e-07 | 0.999999 | 2.35383e-07 | 0.999998 |
| rad41     | 2.27851e-07 | 0.999999 | 2.27986e-07 | 0.999999 |
| rad65     | 2.21060e-07 | 0.999999 | 2.21191e-07 | 0.999999 |
| rad3      | 1.60060e-07 | 0.999999 | 1.60155e-07 | 0.999999 |
| rad56     | 1.59144e-07 | 0.999999 | 1.59238e-07 | 0.999999 |
| rad53     | 1.33393e-07 | 0.999999 | 1.33472e-07 | 0.999999 |
| rad62     | 1.30652e-07 | 1.000000 | 1.30729e-07 | 0.999999 |
| rad4      | 1.21805e-07 | 1.000000 | 1.21878e-07 | 1.000000 |
| rad47     | 8.05327e-08 | 1.000000 | 8.05800e-08 | 1.000000 |
| rad68syn  | 7.42453e-08 | 1.000000 | 7.42893e-08 | 1.000000 |
| rad40syn  | 6.41774e-08 | 1.000000 | 6.42154e-08 | 1.000000 |
| rad64     | 5.35097e-08 | 1.000000 | 5.35414e-08 | 1.000000 |
| rad40anti | 5.17017e-08 | 1.000000 | 5.17324e-08 | 1.000000 |
| rad68anti | 4.81639e-08 | 1.000000 | 4.81924e-08 | 1.000000 |
| rad31     | 2.08538e-08 | 1.000000 | 2.08662e-08 | 1.000000 |
| rad14     | 1.57238e-08 | 1.000000 | 1.57332e-08 | 1.000000 |
| rad5      | 1.48907e-08 | 1.000000 | 1.48995e-08 | 1.000000 |
| rad42     | 1.33034e-08 | 1.000000 | 1.33112e-08 | 1.000000 |
| rad72     | 1.23070e-08 | 1.000000 | 1.23143e-08 | 1.000000 |

1000000.00 Pa, 1500.00000 K

=====

| Rate constant             | True (fraction)       | Effective (fraction)  |
|---------------------------|-----------------------|-----------------------|
| Total                     | 7.80417e-12 (1.00 )   | 7.79558e-12 (1.00 )   |
| Formation of rad19        | 5.22661e-12 (0.670 )  | 5.21912e-12 (0.669 )  |
| H-abstraction to cyc2enyl | 1.80920e-12 (0.232 )  | 1.80920e-12 (0.232 )  |
| H-abstraction to cyc1enyl | 7.68359e-13 (0.0985 ) | 7.67258e-13 (0.0984 ) |

| species                       | PYtrue      | Cumul    | PYeffective | Cumul    |
|-------------------------------|-------------|----------|-------------|----------|
| Benzene+cycloprop-2-enylidene | 0.231825    | 0.231825 | 0.232080    | 0.232080 |
| Indene+H                      | 0.229381    | 0.461205 | 0.229634    | 0.461714 |
| rad9                          | 0.199768    | 0.660974 | 0.199988    | 0.661702 |
| PhCHCCH2+H                    | 0.192220    | 0.853193 | 0.192432    | 0.854134 |
| Benzene+cycloprop-1-enylidene | 0.0984549   | 0.951648 | 0.0984221   | 0.952556 |
| Ph+MeAc                       | 0.00693395  | 0.958582 | 0.00694162  | 0.959498 |
| Ph+Allene                     | 0.00672687  | 0.965309 | 0.00673427  | 0.966232 |
| C2H2+PhCH2                    | 0.00670216  | 0.972011 | 0.00670950  | 0.972941 |
| PhCH2CCH+H                    | 0.00582446  | 0.977836 | 0.00583087  | 0.978772 |
| rad15                         | 0.00359613  | 0.981432 | 0.00360010  | 0.982372 |
| PhcycC3H3_B+H                 | 0.00297837  | 0.984410 | 0.00298165  | 0.985354 |
| PhcycC3H3_A+H                 | 0.00282196  | 0.987232 | 0.00282507  | 0.988179 |
| rad67                         | 0.00281894  | 0.990051 | 0.00282205  | 0.991001 |
| PhCCCH3+H                     | 0.00240540  | 0.992456 | 0.00240805  | 0.993409 |
| PhCCH+CH3                     | 0.00182637  | 0.994283 | 0.00182839  | 0.995238 |
| rad12                         | 0.00127458  | 0.995557 | 0.00127598  | 0.996514 |
| rad35                         | 0.00102170  | 0.996579 | 0.00102282  | 0.997536 |
| Phenyl+cycC3H4                | 0.000959682 | 0.997539 | 0.000959682 | 0.997536 |
| PAH10+CH3                     | 0.000496539 | 0.998035 | 0.000497087 | 0.998034 |
| rad6                          | 0.000247827 | 0.998283 | 0.000248100 | 0.998282 |
| rad45                         | 0.000231834 | 0.998515 | 0.000232089 | 0.998514 |
| rad37                         | 0.000184939 | 0.998700 | 0.000185142 | 0.998699 |
| PAH7+H                        | 0.000157728 | 0.998858 | 0.000157902 | 0.998857 |
| rad11                         | 0.000146386 | 0.999004 | 0.000146548 | 0.999003 |
| PAH9+H                        | 0.000111938 | 0.999116 | 0.000112062 | 0.999115 |
| rad19anti                     | 0.000111808 | 0.999228 | 0.000111931 | 0.999227 |
| PAH3+H                        | 0.000109273 | 0.999337 | 0.000109393 | 0.999337 |
| rad38                         | 9.13693e-05 | 0.999428 | 9.14694e-05 | 0.999428 |
| rad8                          | 7.90337e-05 | 0.999507 | 7.91212e-05 | 0.999507 |
| rad23                         | 7.27289e-05 | 0.999580 | 7.28085e-05 | 0.999580 |
| rad30                         | 4.74390e-05 | 0.999628 | 4.74913e-05 | 0.999628 |
| rad10                         | 4.71561e-05 | 0.999675 | 4.72080e-05 | 0.999675 |
| rad21                         | 4.67354e-05 | 0.999722 | 4.67870e-05 | 0.999722 |
| rad7                          | 2.90504e-05 | 0.999751 | 2.90824e-05 | 0.999751 |
| rad39                         | 2.58900e-05 | 0.999776 | 2.59185e-05 | 0.999777 |
| rad2                          | 2.35781e-05 | 0.999800 | 2.36041e-05 | 0.999800 |
| rad36                         | 2.24407e-05 | 0.999822 | 2.24655e-05 | 0.999823 |
| rad50                         | 2.22909e-05 | 0.999845 | 2.23155e-05 | 0.999845 |
| rad26                         | 2.12202e-05 | 0.999866 | 2.12435e-05 | 0.999866 |
| rad46                         | 1.88262e-05 | 0.999885 | 1.88469e-05 | 0.999885 |
| rad22                         | 1.33231e-05 | 0.999898 | 1.33378e-05 | 0.999898 |
| PAH1+H                        | 1.13838e-05 | 0.999910 | 1.13964e-05 | 0.999910 |

|           |             |          |             |          |
|-----------|-------------|----------|-------------|----------|
| rad20     | 1.00796e-05 | 0.999920 | 1.00907e-05 | 0.999920 |
| rad59     | 9.77135e-06 | 0.999929 | 9.78216e-06 | 0.999930 |
| rad18     | 8.89864e-06 | 0.999938 | 8.90847e-06 | 0.999939 |
| rad19syn  | 7.90966e-06 | 0.999946 | 7.91842e-06 | 0.999946 |
| rad51     | 7.49859e-06 | 0.999954 | 7.50681e-06 | 0.999954 |
| rad1      | 6.87260e-06 | 0.999961 | 6.88016e-06 | 0.999961 |
| rad60syn  | 6.77395e-06 | 0.999967 | 6.78141e-06 | 0.999968 |
| rad13     | 6.39763e-06 | 0.999974 | 6.40468e-06 | 0.999974 |
| rad60anti | 4.30677e-06 | 0.999978 | 4.31152e-06 | 0.999978 |
| rad54     | 4.19914e-06 | 0.999982 | 4.20377e-06 | 0.999983 |
| rad70     | 2.48021e-06 | 0.999985 | 2.48295e-06 | 0.999985 |
| rad24     | 2.45440e-06 | 0.999987 | 2.45711e-06 | 0.999988 |
| rad43     | 2.25709e-06 | 0.999989 | 2.25957e-06 | 0.999990 |
| rad52     | 2.06768e-06 | 0.999991 | 2.06996e-06 | 0.999992 |
| rad58     | 1.43185e-06 | 0.999993 | 1.43343e-06 | 0.999993 |
| rad61     | 1.20906e-06 | 0.999994 | 1.21039e-06 | 0.999994 |
| rad28     | 9.26277e-07 | 0.999995 | 9.27301e-07 | 0.999995 |
| rad25     | 7.14451e-07 | 0.999996 | 7.15238e-07 | 0.999996 |
| rad34     | 7.07332e-07 | 0.999996 | 7.08114e-07 | 0.999997 |
| rad33     | 5.12902e-07 | 0.999997 | 5.13467e-07 | 0.999997 |
| PAH8+H    | 4.25116e-07 | 0.999997 | 4.25584e-07 | 0.999998 |
| rad55     | 3.39851e-07 | 0.999998 | 3.40225e-07 | 0.999998 |
| rad71     | 3.30202e-07 | 0.999998 | 3.30566e-07 | 0.999998 |
| rad27     | 2.97302e-07 | 0.999998 | 2.97630e-07 | 0.999999 |
| rad73     | 2.27327e-07 | 0.999999 | 2.27578e-07 | 0.999999 |
| rad41     | 2.17957e-07 | 0.999999 | 2.18197e-07 | 0.999999 |
| rad65     | 2.13442e-07 | 0.999999 | 2.13677e-07 | 0.999999 |
| rad56     | 1.54963e-07 | 0.999999 | 1.55133e-07 | 1.000000 |
| rad3      | 1.45059e-07 | 0.999999 | 1.45219e-07 | 1.000000 |
| rad53     | 1.29813e-07 | 0.999999 | 1.29956e-07 | 1.000000 |
| rad62     | 1.25605e-07 | 1.000000 | 1.25744e-07 | 1.000000 |
| rad4      | 1.10208e-07 | 1.000000 | 1.10329e-07 | 1.000000 |
| rad47     | 7.38293e-08 | 1.000000 | 7.39112e-08 | 1.000000 |
| rad68syn  | 7.07901e-08 | 1.000000 | 7.08677e-08 | 1.000000 |
| rad40syn  | 6.11551e-08 | 1.000000 | 6.12225e-08 | 1.000000 |
| rad64     | 5.13630e-08 | 1.000000 | 5.14196e-08 | 1.000000 |
| rad40anti | 4.92656e-08 | 1.000000 | 4.93199e-08 | 1.000000 |
| rad68anti | 4.59235e-08 | 1.000000 | 4.59741e-08 | 1.000000 |
| rad5      | 4.57444e-08 | 1.000000 | 4.57948e-08 | 1.000000 |
| rad31     | 1.92328e-08 | 1.000000 | 1.92539e-08 | 1.000000 |
| rad14     | 1.82524e-08 | 1.000000 | 1.82725e-08 | 1.000000 |
| rad42     | 1.27801e-08 | 1.000000 | 1.27942e-08 | 1.000000 |
| rad72     | 1.18920e-08 | 1.000000 | 1.19051e-08 | 1.000000 |

100000.000 Pa, 20.0000000 K

| Rate constant             | True (fraction)         | Effective (fraction)    |
|---------------------------|-------------------------|-------------------------|
| Total                     | 1.24541e-22 (1.00 )     | 1.24541e-22 (1.00 )     |
| Formation of rad19        | 1.24541e-22 (1.00 )     | 1.24541e-22 (1.00 )     |
| H-abstraction to cyc2enyl | 3.84323e-68 (3.09e-46)  | 3.84323e-68 (3.09e-46)  |
| H-abstraction to cyclenyl | 6.26313e-106 (5.03e-84) | 6.26313e-106 (5.03e-84) |

| species       | PYtrue      | Cumul    | PYeffective | Cumul    |
|---------------|-------------|----------|-------------|----------|
| rad9          | 0.793361    | 0.793361 | 0.793361    | 0.793361 |
| rad19anti     | 0.205969    | 0.999330 | 0.205969    | 0.999330 |
| rad15         | 0.000658805 | 0.999989 | 0.000658805 | 0.999989 |
| Indene+H      | 1.00723e-05 | 0.999999 | 1.00723e-05 | 0.999999 |
| rad12         | 1.02139e-06 | 1.000000 | 1.02139e-06 | 1.000000 |
| PhCHCCH2+H    | 5.49243e-09 | 1.000000 | 5.49243e-09 | 1.000000 |
| rad11         | 2.68209e-10 | 1.000000 | 2.68209e-10 | 1.000000 |
| rad2          | 2.01698e-10 | 1.000000 | 2.01698e-10 | 1.000000 |
| rad7          | 7.08765e-11 | 1.000000 | 7.08765e-11 | 1.000000 |
| rad18         | 6.40595e-11 | 1.000000 | 6.40595e-11 | 1.000000 |
| rad26         | 2.83501e-11 | 1.000000 | 2.83501e-11 | 1.000000 |
| rad1          | 1.87604e-11 | 1.000000 | 1.87604e-11 | 1.000000 |
| rad21         | 6.42412e-12 | 1.000000 | 6.42412e-12 | 1.000000 |
| rad6          | 5.44781e-12 | 1.000000 | 5.44781e-12 | 1.000000 |
| rad20         | 4.97388e-12 | 1.000000 | 4.97388e-12 | 1.000000 |
| rad22         | 3.18589e-12 | 1.000000 | 3.18589e-12 | 1.000000 |
| rad67         | 7.43396e-13 | 1.000000 | 7.43396e-13 | 1.000000 |
| rad8          | 7.41529e-13 | 1.000000 | 7.41529e-13 | 1.000000 |
| rad45         | 6.99877e-13 | 1.000000 | 6.99877e-13 | 1.000000 |
| rad35         | 3.44205e-13 | 1.000000 | 3.44205e-13 | 1.000000 |
| C2H2+PhCH2    | 1.57970e-13 | 1.000000 | 1.57970e-13 | 1.000000 |
| rad5          | 1.50722e-13 | 1.000000 | 1.50722e-13 | 1.000000 |
| rad10         | 7.88927e-14 | 1.000000 | 7.88927e-14 | 1.000000 |
| PhcycC3H3_A+H | 7.58459e-14 | 1.000000 | 7.58459e-14 | 1.000000 |
| rad36         | 5.24061e-14 | 1.000000 | 5.24061e-14 | 1.000000 |



|                               |             |          |             |          |
|-------------------------------|-------------|----------|-------------|----------|
| rad3                          | 2.03735e-14 | 1.000000 | 2.03735e-14 | 1.000000 |
| rad4                          | 1.18037e-14 | 1.000000 | 1.18037e-14 | 1.000000 |
| rad23                         | 7.26996e-15 | 1.000000 | 7.26996e-15 | 1.000000 |
| PhCCCH3+H                     | 4.84715e-15 | 1.000000 | 4.84715e-15 | 1.000000 |
| Ph+MeAc                       | 2.79228e-15 | 1.000000 | 2.79228e-15 | 1.000000 |
| rad25                         | 1.90425e-15 | 1.000000 | 1.90425e-15 | 1.000000 |
| rad24                         | 1.89274e-15 | 1.000000 | 1.89274e-15 | 1.000000 |
| Ph+Allene                     | 1.21253e-15 | 1.000000 | 1.21253e-15 | 1.000000 |
| rad27                         | 8.30037e-16 | 1.000000 | 8.30037e-16 | 1.000000 |
| rad30                         | 5.14833e-16 | 1.000000 | 5.14833e-16 | 1.000000 |
| PhCCH+CH3                     | 2.82590e-16 | 1.000000 | 2.82590e-16 | 1.000000 |
| rad13                         | 1.79630e-16 | 1.000000 | 1.79630e-16 | 1.000000 |
| PhCH2CCH+H                    | 1.74213e-16 | 1.000000 | 1.74213e-16 | 1.000000 |
| Phenyl+cycC3H4                | 2.85868e-17 | 1.000000 | 0.00000     | 1.000000 |
| rad37                         | 1.71744e-18 | 1.000000 | 1.71744e-18 | 1.000000 |
| rad33                         | 1.48498e-18 | 1.000000 | 1.48498e-18 | 1.000000 |
| rad60syn                      | 1.29289e-18 | 1.000000 | 1.29289e-18 | 1.000000 |
| rad28                         | 6.67730e-19 | 1.000000 | 6.67730e-19 | 1.000000 |
| rad60anti                     | 6.06030e-19 | 1.000000 | 6.06030e-19 | 1.000000 |
| rad14                         | 4.64133e-19 | 1.000000 | 4.64133e-19 | 1.000000 |
| PAH3+H                        | 3.20659e-19 | 1.000000 | 3.20659e-19 | 1.000000 |
| rad59                         | 7.02228e-20 | 1.000000 | 7.02228e-20 | 1.000000 |
| PAH7+H                        | 4.97153e-20 | 1.000000 | 4.97153e-20 | 1.000000 |
| PhcycC3H3_B+H                 | 1.41886e-20 | 1.000000 | 1.41886e-20 | 1.000000 |
| rad31                         | 9.66779e-21 | 1.000000 | 9.66779e-21 | 1.000000 |
| rad38                         | 7.59844e-21 | 1.000000 | 7.59844e-21 | 1.000000 |
| PAH10+CH3                     | 9.23118e-22 | 1.000000 | 9.23118e-22 | 1.000000 |
| rad46                         | 2.37555e-22 | 1.000000 | 2.37555e-22 | 1.000000 |
| PAH9+H                        | 2.60714e-23 | 1.000000 | 2.60714e-23 | 1.000000 |
| rad43                         | 1.32241e-23 | 1.000000 | 1.32241e-23 | 1.000000 |
| rad58                         | 1.35836e-24 | 1.000000 | 1.35836e-24 | 1.000000 |
| rad50                         | 7.73094e-25 | 1.000000 | 7.73094e-25 | 1.000000 |
| rad70                         | 6.56606e-25 | 1.000000 | 6.56606e-25 | 1.000000 |
| rad39                         | 1.37015e-25 | 1.000000 | 1.37015e-25 | 1.000000 |
| PAH1+H                        | 2.27621e-26 | 1.000000 | 2.27621e-26 | 1.000000 |
| rad54                         | 6.34587e-27 | 1.000000 | 6.34587e-27 | 1.000000 |
| rad34                         | 4.13915e-27 | 1.000000 | 4.13915e-27 | 1.000000 |
| rad52                         | 3.32777e-27 | 1.000000 | 3.32777e-27 | 1.000000 |
| rad62                         | 2.39014e-27 | 1.000000 | 2.39014e-27 | 1.000000 |
| rad51                         | 5.84658e-28 | 1.000000 | 5.84658e-28 | 1.000000 |
| rad41                         | 5.49309e-29 | 1.000000 | 5.49309e-29 | 1.000000 |
| rad55                         | 2.93433e-29 | 1.000000 | 2.93433e-29 | 1.000000 |
| rad47                         | 8.15775e-30 | 1.000000 | 8.15775e-30 | 1.000000 |
| rad42                         | 5.09118e-32 | 1.000000 | 5.09118e-32 | 1.000000 |
| rad65                         | 1.73757e-32 | 1.000000 | 1.73757e-32 | 1.000000 |
| rad19syn                      | 7.76122e-33 | 1.000000 | 7.76122e-33 | 1.000000 |
| rad53                         | 4.12842e-37 | 1.000000 | 4.12842e-37 | 1.000000 |
| rad61                         | 4.04082e-38 | 1.000000 | 4.04082e-38 | 1.000000 |
| rad68syn                      | 2.89319e-41 | 1.000000 | 2.89319e-41 | 1.000000 |
| rad64                         | 2.45067e-41 | 1.000000 | 2.45067e-41 | 1.000000 |
| rad68anti                     | 2.36140e-41 | 1.000000 | 2.36140e-41 | 1.000000 |
| rad56                         | 1.01636e-43 | 1.000000 | 1.01636e-43 | 1.000000 |
| Benzene+cycloprop-2-enylidene | 3.08591e-46 | 1.000000 | 3.08591e-46 | 1.000000 |
| rad40syn                      | 7.52426e-47 | 1.000000 | 7.52426e-47 | 1.000000 |
| rad40anti                     | 5.79606e-47 | 1.000000 | 5.79606e-47 | 1.000000 |
| rad73                         | 7.44192e-49 | 1.000000 | 7.44192e-49 | 1.000000 |
| PAH8+H                        | 1.37613e-49 | 1.000000 | 1.37613e-49 | 1.000000 |
| rad71                         | 2.47388e-54 | 1.000000 | 2.47388e-54 | 1.000000 |
| Benzene+cycloprop-1-enylidene | 5.02895e-84 | 1.000000 | 5.02895e-84 | 1.000000 |

100000.000 Pa, 30.0000000 K

=====

| Rate constant             | True (fraction)        | Effective (fraction)   |
|---------------------------|------------------------|------------------------|
| Total                     | 8.13009e-20 (1.00 )    | 8.13009e-20 (1.00 )    |
| Formation of rad19        | 8.13009e-20 (1.00 )    | 8.13009e-20 (1.00 )    |
| H-abstraction to cyc2enyl | 1.08880e-49 (1.34e-30) | 1.08880e-49 (1.34e-30) |
| H-abstraction to cyclenyl | 7.55172e-75 (9.29e-56) | 7.55172e-75 (9.29e-56) |

| species    | PYtrue      | Cumul    | PYeffective | Cumul    |
|------------|-------------|----------|-------------|----------|
| rad9       | 0.948121    | 0.948121 | 0.948121    | 0.948121 |
| rad19anti  | 0.0502700   | 0.998391 | 0.0502700   | 0.998391 |
| rad15      | 0.00155432  | 0.999945 | 0.00155432  | 0.999945 |
| Indene+H   | 5.42413e-05 | 1.000000 | 5.42413e-05 | 1.000000 |
| rad12      | 5.35911e-07 | 1.000000 | 5.35911e-07 | 1.000000 |
| PhCHCCH2+H | 1.70955e-08 | 1.000000 | 1.70955e-08 | 1.000000 |
| rad11      | 8.27930e-10 | 1.000000 | 8.27930e-10 | 1.000000 |
| rad2       | 6.37568e-10 | 1.000000 | 6.37568e-10 | 1.000000 |
| rad18      | 3.20886e-10 | 1.000000 | 3.20886e-10 | 1.000000 |

|                               |             |         |             |         |
|-------------------------------|-------------|---------|-------------|---------|
| rad26                         | 9.38977e-11 | 1.00000 | 9.38977e-11 | 1.00000 |
| rad7                          | 7.01119e-11 | 1.00000 | 7.01119e-11 | 1.00000 |
| rad1                          | 5.34608e-11 | 1.00000 | 5.34608e-11 | 1.00000 |
| rad6                          | 2.51268e-11 | 1.00000 | 2.51268e-11 | 1.00000 |
| rad22                         | 1.89501e-11 | 1.00000 | 1.89501e-11 | 1.00000 |
| rad20                         | 1.85385e-11 | 1.00000 | 1.85385e-11 | 1.00000 |
| rad21                         | 1.51331e-11 | 1.00000 | 1.51331e-11 | 1.00000 |
| rad67                         | 4.52007e-12 | 1.00000 | 4.52007e-12 | 1.00000 |
| rad45                         | 3.66816e-12 | 1.00000 | 3.66816e-12 | 1.00000 |
| rad35                         | 2.08620e-12 | 1.00000 | 2.08620e-12 | 1.00000 |
| C2H2+PhCH2                    | 1.53356e-12 | 1.00000 | 1.53356e-12 | 1.00000 |
| rad10                         | 5.16568e-13 | 1.00000 | 5.16568e-13 | 1.00000 |
| rad36                         | 2.53694e-13 | 1.00000 | 2.53694e-13 | 1.00000 |
| rad5                          | 2.20294e-13 | 1.00000 | 2.20294e-13 | 1.00000 |
| PhcycC3H3_A+H                 | 1.37771e-13 | 1.00000 | 1.37771e-13 | 1.00000 |
| rad3                          | 1.34998e-13 | 1.00000 | 1.34998e-13 | 1.00000 |
| rad23                         | 8.67109e-14 | 1.00000 | 8.67109e-14 | 1.00000 |
| rad4                          | 7.55725e-14 | 1.00000 | 7.55725e-14 | 1.00000 |
| PhCCCH3+H                     | 3.22033e-14 | 1.00000 | 3.22033e-14 | 1.00000 |
| Ph+MeAc                       | 1.85688e-14 | 1.00000 | 1.85688e-14 | 1.00000 |
| rad25                         | 1.13110e-14 | 1.00000 | 1.13110e-14 | 1.00000 |
| Ph+Allene                     | 8.09385e-15 | 1.00000 | 8.09385e-15 | 1.00000 |
| rad30                         | 5.97336e-15 | 1.00000 | 5.97336e-15 | 1.00000 |
| rad27                         | 4.81234e-15 | 1.00000 | 4.81234e-15 | 1.00000 |
| rad24                         | 1.99172e-15 | 1.00000 | 1.99172e-15 | 1.00000 |
| PhCCH+CH3                     | 1.19520e-15 | 1.00000 | 1.19520e-15 | 1.00000 |
| PhCH2CCH+H                    | 1.17593e-15 | 1.00000 | 1.17593e-15 | 1.00000 |
| rad13                         | 1.05110e-15 | 1.00000 | 1.05110e-15 | 1.00000 |
| Phenyl+cycC3H4                | 5.29012e-17 | 1.00000 | 0.00000     | 1.00000 |
| rad60syn                      | 1.54463e-17 | 1.00000 | 1.54463e-17 | 1.00000 |
| rad37                         | 1.26791e-17 | 1.00000 | 1.26791e-17 | 1.00000 |
| rad8                          | 8.18636e-18 | 1.00000 | 8.18636e-18 | 1.00000 |
| rad60anti                     | 7.25666e-18 | 1.00000 | 7.25666e-18 | 1.00000 |
| rad14                         | 6.13215e-18 | 1.00000 | 6.13215e-18 | 1.00000 |
| rad33                         | 5.44758e-18 | 1.00000 | 5.44758e-18 | 1.00000 |
| rad28                         | 5.01054e-18 | 1.00000 | 5.01054e-18 | 1.00000 |
| PAH3+H                        | 3.93434e-18 | 1.00000 | 3.93434e-18 | 1.00000 |
| rad59                         | 8.59001e-19 | 1.00000 | 8.59001e-19 | 1.00000 |
| PAH7+H                        | 5.71648e-19 | 1.00000 | 5.71648e-19 | 1.00000 |
| rad38                         | 7.95240e-20 | 1.00000 | 7.95240e-20 | 1.00000 |
| PhcycC3H3_B+H                 | 2.11715e-20 | 1.00000 | 2.11715e-20 | 1.00000 |
| rad31                         | 2.08118e-20 | 1.00000 | 2.08118e-20 | 1.00000 |
| PAH10+CH3                     | 7.20728e-21 | 1.00000 | 7.20728e-21 | 1.00000 |
| rad46                         | 2.98220e-21 | 1.00000 | 2.98220e-21 | 1.00000 |
| PAH9+H                        | 6.87775e-22 | 1.00000 | 6.87775e-22 | 1.00000 |
| rad43                         | 1.78507e-22 | 1.00000 | 1.78507e-22 | 1.00000 |
| rad58                         | 1.77735e-23 | 1.00000 | 1.77735e-23 | 1.00000 |
| rad50                         | 1.02215e-23 | 1.00000 | 1.02215e-23 | 1.00000 |
| rad70                         | 9.03459e-24 | 1.00000 | 9.03459e-24 | 1.00000 |
| rad39                         | 2.12820e-24 | 1.00000 | 2.12820e-24 | 1.00000 |
| PAH1+H                        | 1.88019e-25 | 1.00000 | 1.88019e-25 | 1.00000 |
| rad54                         | 7.49925e-26 | 1.00000 | 7.49925e-26 | 1.00000 |
| rad62                         | 6.87599e-26 | 1.00000 | 6.87599e-26 | 1.00000 |
| rad34                         | 5.85104e-26 | 1.00000 | 5.85104e-26 | 1.00000 |
| rad52                         | 4.58556e-26 | 1.00000 | 4.58556e-26 | 1.00000 |
| rad51                         | 8.30274e-27 | 1.00000 | 8.30274e-27 | 1.00000 |
| rad41                         | 8.03945e-28 | 1.00000 | 8.03945e-28 | 1.00000 |
| rad55                         | 3.51498e-28 | 1.00000 | 3.51498e-28 | 1.00000 |
| rad47                         | 9.45109e-29 | 1.00000 | 9.45109e-29 | 1.00000 |
| rad42                         | 1.55008e-30 | 1.00000 | 1.55008e-30 | 1.00000 |
| Benzene+cycloprop-2-enylidene | 1.33923e-30 | 1.00000 | 1.33923e-30 | 1.00000 |
| rad65                         | 4.99874e-31 | 1.00000 | 4.99874e-31 | 1.00000 |
| rad19syn                      | 7.02180e-34 | 1.00000 | 7.02180e-34 | 1.00000 |
| rad53                         | 7.43355e-36 | 1.00000 | 7.43355e-36 | 1.00000 |
| rad61                         | 2.99164e-37 | 1.00000 | 2.99164e-37 | 1.00000 |
| rad64                         | 3.96240e-40 | 1.00000 | 3.96240e-40 | 1.00000 |
| rad68syn                      | 3.59096e-40 | 1.00000 | 3.59096e-40 | 1.00000 |
| rad68anti                     | 2.93242e-40 | 1.00000 | 2.93242e-40 | 1.00000 |
| rad56                         | 1.84414e-42 | 1.00000 | 1.84414e-42 | 1.00000 |
| rad40syn                      | 8.87073e-46 | 1.00000 | 8.87073e-46 | 1.00000 |
| rad40anti                     | 6.84635e-46 | 1.00000 | 6.84635e-46 | 1.00000 |
| rad73                         | 1.15309e-47 | 1.00000 | 1.15309e-47 | 1.00000 |
| PAH8+H                        | 1.55187e-48 | 1.00000 | 1.55187e-48 | 1.00000 |
| rad71                         | 3.54374e-53 | 1.00000 | 3.54374e-53 | 1.00000 |
| Benzene+cycloprop-1-enylidene | 9.28861e-56 | 1.00000 | 9.28861e-56 | 1.00000 |

100000.000 Pa, 40.0000000 K

=====

Rate constant | True (fraction) | Effective (fraction)

-----

|                           |                        |                        |
|---------------------------|------------------------|------------------------|
| Total                     | 2.24819e-18 (1.00 )    | 2.24819e-18 (1.00 )    |
| Formation of rad19        | 2.24819e-18 (1.00 )    | 2.24819e-18 (1.00 )    |
| H-abstraction to cyc2enyl | 1.72361e-40 (7.67e-23) | 1.72361e-40 (7.67e-23) |
| H-abstraction to cyclenyl | 2.48792e-59 (1.11e-41) | 2.48792e-59 (1.11e-41) |

| species                       | PYtrue      | Cumul    | PYeffective | Cumul    |
|-------------------------------|-------------|----------|-------------|----------|
| rad9                          | 0.982647    | 0.982647 | 0.982647    | 0.982647 |
| rad19anti                     | 0.0149994   | 0.997646 | 0.0149994   | 0.997646 |
| rad15                         | 0.00222571  | 0.999872 | 0.00222571  | 0.999872 |
| Indene+H                      | 0.000127356 | 0.999999 | 0.000127356 | 0.999999 |
| rad12                         | 3.61112e-07 | 1.000000 | 3.61112e-07 | 1.000000 |
| PhCHCCH2+H                    | 3.10469e-08 | 1.000000 | 3.10469e-08 | 1.000000 |
| rad11                         | 1.48941e-09 | 1.000000 | 1.48941e-09 | 1.000000 |
| rad2                          | 1.16894e-09 | 1.000000 | 1.16894e-09 | 1.000000 |
| rad18                         | 6.94950e-10 | 1.000000 | 6.94950e-10 | 1.000000 |
| rad26                         | 1.74483e-10 | 1.000000 | 1.74483e-10 | 1.000000 |
| rad1                          | 9.33533e-11 | 1.000000 | 9.33533e-11 | 1.000000 |
| rad7                          | 7.04321e-11 | 1.000000 | 7.04321e-11 | 1.000000 |
| rad6                          | 6.33201e-11 | 1.000000 | 6.33201e-11 | 1.000000 |
| rad22                         | 5.18403e-11 | 1.000000 | 5.18403e-11 | 1.000000 |
| rad20                         | 3.56140e-11 | 1.000000 | 3.56140e-11 | 1.000000 |
| rad21                         | 2.57100e-11 | 1.000000 | 2.57100e-11 | 1.000000 |
| rad67                         | 1.17762e-11 | 1.000000 | 1.17762e-11 | 1.000000 |
| rad45                         | 9.10598e-12 | 1.000000 | 9.10598e-12 | 1.000000 |
| rad35                         | 5.41919e-12 | 1.000000 | 5.41919e-12 | 1.000000 |
| C2H2+PhCH2                    | 5.16011e-12 | 1.000000 | 5.16011e-12 | 1.000000 |
| rad10                         | 1.43875e-12 | 1.000000 | 1.43875e-12 | 1.000000 |
| rad36                         | 6.09606e-13 | 1.000000 | 6.09606e-13 | 1.000000 |
| rad3                          | 3.78209e-13 | 1.000000 | 3.78209e-13 | 1.000000 |
| rad23                         | 3.41986e-13 | 1.000000 | 3.41986e-13 | 1.000000 |
| rad5                          | 3.03398e-13 | 1.000000 | 3.03398e-13 | 1.000000 |
| rad4                          | 2.08200e-13 | 1.000000 | 2.08200e-13 | 1.000000 |
| PhcycC3H3_A+H                 | 2.02581e-13 | 1.000000 | 2.02581e-13 | 1.000000 |
| PhCCCH3+H                     | 9.14056e-14 | 1.000000 | 9.14056e-14 | 1.000000 |
| Ph+MeAc                       | 5.30349e-14 | 1.000000 | 5.30349e-14 | 1.000000 |
| rad25                         | 2.87475e-14 | 1.000000 | 2.87475e-14 | 1.000000 |
| Ph+Allene                     | 2.30316e-14 | 1.000000 | 2.30316e-14 | 1.000000 |
| rad30                         | 2.19013e-14 | 1.000000 | 2.19013e-14 | 1.000000 |
| rad27                         | 1.19615e-14 | 1.000000 | 1.19615e-14 | 1.000000 |
| PhCCH+CH3                     | 3.48830e-15 | 1.000000 | 3.48830e-15 | 1.000000 |
| PhCH2CCH+H                    | 3.38536e-15 | 1.000000 | 3.38536e-15 | 1.000000 |
| rad13                         | 2.74566e-15 | 1.000000 | 2.74566e-15 | 1.000000 |
| rad24                         | 2.07183e-15 | 1.000000 | 2.07183e-15 | 1.000000 |
| Phenyl+cycC3H4                | 1.15798e-16 | 1.000000 | 0.000000    | 1.000000 |
| rad60syn                      | 5.83120e-17 | 1.000000 | 5.83120e-17 | 1.000000 |
| rad37                         | 3.75923e-17 | 1.000000 | 3.75923e-17 | 1.000000 |
| rad60anti                     | 2.74583e-17 | 1.000000 | 2.74583e-17 | 1.000000 |
| rad14                         | 2.53457e-17 | 1.000000 | 2.53457e-17 | 1.000000 |
| rad28                         | 1.54194e-17 | 1.000000 | 1.54194e-17 | 1.000000 |
| PAH3+H                        | 1.52758e-17 | 1.000000 | 1.52758e-17 | 1.000000 |
| rad33                         | 1.10501e-17 | 1.000000 | 1.10501e-17 | 1.000000 |
| rad59                         | 3.32415e-18 | 1.000000 | 3.32415e-18 | 1.000000 |
| PAH7+H                        | 2.25067e-18 | 1.000000 | 2.25067e-18 | 1.000000 |
| rad38                         | 2.92095e-19 | 1.000000 | 2.92095e-19 | 1.000000 |
| PhcycC3H3_B+H                 | 3.72873e-20 | 1.000000 | 3.72873e-20 | 1.000000 |
| rad31                         | 3.26401e-20 | 1.000000 | 3.26401e-20 | 1.000000 |
| PAH10+CH3                     | 2.25293e-20 | 1.000000 | 2.25293e-20 | 1.000000 |
| rad46                         | 1.18403e-20 | 1.000000 | 1.18403e-20 | 1.000000 |
| rad8                          | 6.65317e-21 | 1.000000 | 6.65317e-21 | 1.000000 |
| PAH9+H                        | 4.25345e-21 | 1.000000 | 4.25345e-21 | 1.000000 |
| rad43                         | 7.64275e-22 | 1.000000 | 7.64275e-22 | 1.000000 |
| Benzene+cycloprop-2-enylidene | 7.66665e-23 | 1.000000 | 7.66665e-23 | 1.000000 |
| rad58                         | 7.46371e-23 | 1.000000 | 7.46371e-23 | 1.000000 |
| rad50                         | 4.20547e-23 | 1.000000 | 4.20547e-23 | 1.000000 |
| rad70                         | 3.98025e-23 | 1.000000 | 3.98025e-23 | 1.000000 |
| rad39                         | 9.89223e-24 | 1.000000 | 9.89223e-24 | 1.000000 |
| PAH1+H                        | 6.30025e-25 | 1.000000 | 6.30025e-25 | 1.000000 |
| rad62                         | 4.63902e-25 | 1.000000 | 4.63902e-25 | 1.000000 |
| rad54                         | 3.37067e-25 | 1.000000 | 3.37067e-25 | 1.000000 |
| rad34                         | 2.69029e-25 | 1.000000 | 2.69029e-25 | 1.000000 |
| rad52                         | 1.93888e-25 | 1.000000 | 1.93888e-25 | 1.000000 |
| rad51                         | 3.60309e-26 | 1.000000 | 3.60309e-26 | 1.000000 |
| rad41                         | 3.92825e-27 | 1.000000 | 3.92825e-27 | 1.000000 |
| rad55                         | 1.62504e-27 | 1.000000 | 1.62504e-27 | 1.000000 |
| rad47                         | 3.47143e-28 | 1.000000 | 3.47143e-28 | 1.000000 |
| rad42                         | 1.16089e-29 | 1.000000 | 1.16089e-29 | 1.000000 |
| rad65                         | 3.37614e-30 | 1.000000 | 3.37614e-30 | 1.000000 |
| rad19syn                      | 3.71390e-34 | 1.000000 | 3.71390e-34 | 1.000000 |
| rad53                         | 4.92912e-35 | 1.000000 | 4.92912e-35 | 1.000000 |

|                               |             |          |             |          |
|-------------------------------|-------------|----------|-------------|----------|
| rad61                         | 1.34348e-36 | 1.000000 | 1.34348e-36 | 1.000000 |
| rad64                         | 2.54425e-39 | 1.000000 | 2.54425e-39 | 1.000000 |
| rad68syn                      | 2.17663e-39 | 1.000000 | 2.17663e-39 | 1.000000 |
| rad68anti                     | 1.77709e-39 | 1.000000 | 1.77709e-39 | 1.000000 |
| rad56                         | 1.34053e-41 | 1.000000 | 1.34053e-41 | 1.000000 |
| Benzene+cycloprop-1-enylidene | 1.10663e-41 | 1.000000 | 1.10663e-41 | 1.000000 |
| rad40syn                      | 6.04658e-45 | 1.000000 | 6.04658e-45 | 1.000000 |
| rad40anti                     | 4.67716e-45 | 1.000000 | 4.67716e-45 | 1.000000 |
| rad73                         | 8.66604e-47 | 1.000000 | 8.66604e-47 | 1.000000 |
| PAH8+H                        | 1.08257e-47 | 1.000000 | 1.08257e-47 | 1.000000 |
| rad71                         | 2.85532e-52 | 1.000000 | 2.85532e-52 | 1.000000 |

100000.000 Pa, 50.0000000 K

| Rate constant             | True (fraction)        | Effective (fraction)   |
|---------------------------|------------------------|------------------------|
| Total                     | 1.72707e-17 (1.00 )    | 1.72707e-17 (1.00 )    |
| Formation of rad19        | 1.72707e-17 (1.00 )    | 1.72707e-17 (1.00 )    |
| H-abstraction to cyc2enyl | 5.49905e-35 (3.18e-18) | 5.49905e-35 (3.18e-18) |
| H-abstraction to cyclenyl | 4.93090e-50 (2.86e-33) | 4.93090e-50 (2.86e-33) |

| species                       | PYtrue      | Cumul    | PYeffective | Cumul    |
|-------------------------------|-------------|----------|-------------|----------|
| rad9                          | 0.991889    | 0.991889 | 0.991889    | 0.991889 |
| rad19anti                     | 0.00519279  | 0.997082 | 0.00519279  | 0.997082 |
| rad15                         | 0.00269647  | 0.999778 | 0.00269647  | 0.999778 |
| Indene+H                      | 0.000221073 | 0.999999 | 0.000221073 | 0.999999 |
| rad12                         | 2.74563e-07 | 1.000000 | 2.74563e-07 | 1.000000 |
| PhCHCCH2+H                    | 4.64798e-08 | 1.000000 | 4.64798e-08 | 1.000000 |
| rad11                         | 2.20751e-09 | 1.000000 | 2.20751e-09 | 1.000000 |
| rad2                          | 1.76271e-09 | 1.000000 | 1.76271e-09 | 1.000000 |
| rad18                         | 1.10876e-09 | 1.000000 | 1.10876e-09 | 1.000000 |
| rad26                         | 2.64659e-10 | 1.000000 | 2.64659e-10 | 1.000000 |
| rad1                          | 1.36679e-10 | 1.000000 | 1.36679e-10 | 1.000000 |
| rad6                          | 1.22110e-10 | 1.000000 | 1.22110e-10 | 1.000000 |
| rad22                         | 1.04986e-10 | 1.000000 | 1.04986e-10 | 1.000000 |
| rad7                          | 7.14408e-11 | 1.000000 | 7.14408e-11 | 1.000000 |
| rad20                         | 5.46511e-11 | 1.000000 | 5.46511e-11 | 1.000000 |
| rad21                         | 3.80640e-11 | 1.000000 | 3.80640e-11 | 1.000000 |
| rad67                         | 2.24454e-11 | 1.000000 | 2.24454e-11 | 1.000000 |
| rad45                         | 1.73231e-11 | 1.000000 | 1.73231e-11 | 1.000000 |
| C2H2+PhCH2                    | 1.18046e-11 | 1.000000 | 1.18046e-11 | 1.000000 |
| rad35                         | 1.03000e-11 | 1.000000 | 1.03000e-11 | 1.000000 |
| rad10                         | 2.91802e-12 | 1.000000 | 2.91802e-12 | 1.000000 |
| rad36                         | 1.13890e-12 | 1.000000 | 1.13890e-12 | 1.000000 |
| rad23                         | 8.93985e-13 | 1.000000 | 8.93985e-13 | 1.000000 |
| rad3                          | 7.69864e-13 | 1.000000 | 7.69864e-13 | 1.000000 |
| rad4                          | 4.19395e-13 | 1.000000 | 4.19395e-13 | 1.000000 |
| rad5                          | 4.01532e-13 | 1.000000 | 4.01532e-13 | 1.000000 |
| PhcycC3H3_A+H                 | 2.79026e-13 | 1.000000 | 2.79026e-13 | 1.000000 |
| PhCCCH3+H                     | 1.89176e-13 | 1.000000 | 1.89176e-13 | 1.000000 |
| Ph+MeAc                       | 1.10619e-13 | 1.000000 | 1.10619e-13 | 1.000000 |
| rad25                         | 5.33842e-14 | 1.000000 | 5.33842e-14 | 1.000000 |
| rad30                         | 5.22321e-14 | 1.000000 | 5.22321e-14 | 1.000000 |
| Ph+Allene                     | 4.77641e-14 | 1.000000 | 4.77641e-14 | 1.000000 |
| rad27                         | 2.17790e-14 | 1.000000 | 2.17790e-14 | 1.000000 |
| PhCCH+CH3                     | 8.16982e-15 | 1.000000 | 8.16982e-15 | 1.000000 |
| PhCH2CCH+H                    | 7.10599e-15 | 1.000000 | 7.10599e-15 | 1.000000 |
| rad13                         | 5.19923e-15 | 1.000000 | 5.19923e-15 | 1.000000 |
| rad24                         | 2.14657e-15 | 1.000000 | 2.14657e-15 | 1.000000 |
| Phenyl+cycC3H4                | 2.36450e-16 | 1.000000 | 0.000000    | 1.000000 |
| rad60syn                      | 1.43156e-16 | 1.000000 | 1.43156e-16 | 1.000000 |
| rad37                         | 8.00247e-17 | 1.000000 | 8.00247e-17 | 1.000000 |
| rad14                         | 6.77096e-17 | 1.000000 | 6.77096e-17 | 1.000000 |
| rad60anti                     | 6.75676e-17 | 1.000000 | 6.75676e-17 | 1.000000 |
| PAH3+H                        | 3.85993e-17 | 1.000000 | 3.85993e-17 | 1.000000 |
| rad28                         | 3.42826e-17 | 1.000000 | 3.42826e-17 | 1.000000 |
| rad33                         | 1.78501e-17 | 1.000000 | 1.78501e-17 | 1.000000 |
| rad59                         | 8.37011e-18 | 1.000000 | 8.37011e-18 | 1.000000 |
| PAH7+H                        | 5.88104e-18 | 1.000000 | 5.88104e-18 | 1.000000 |
| Benzene+cycloprop-2-enylidene | 3.18404e-18 | 1.000000 | 3.18404e-18 | 1.000000 |
| rad38                         | 7.30506e-19 | 1.000000 | 7.30506e-19 | 1.000000 |
| PhcycC3H3_B+H                 | 8.21930e-20 | 1.000000 | 8.21930e-20 | 1.000000 |
| PAH10+CH3                     | 5.06624e-20 | 1.000000 | 5.06624e-20 | 1.000000 |
| rad31                         | 4.52897e-20 | 1.000000 | 4.52897e-20 | 1.000000 |
| rad46                         | 3.10544e-20 | 1.000000 | 3.10544e-20 | 1.000000 |
| PAH9+H                        | 1.53065e-20 | 1.000000 | 1.53065e-20 | 1.000000 |
| rad43                         | 2.13517e-21 | 1.000000 | 2.13517e-21 | 1.000000 |
| rad58                         | 2.05612e-22 | 1.000000 | 2.05612e-22 | 1.000000 |
| rad70                         | 1.14831e-22 | 1.000000 | 1.14831e-22 | 1.000000 |

|                               |             |          |             |          |
|-------------------------------|-------------|----------|-------------|----------|
| rad50                         | 1.13781e-22 | 1.000000 | 1.13781e-22 | 1.000000 |
| rad8                          | 4.40130e-23 | 1.000000 | 4.40130e-23 | 1.000000 |
| rad39                         | 2.95554e-23 | 1.000000 | 2.95554e-23 | 1.000000 |
| rad62                         | 1.81914e-24 | 1.000000 | 1.81914e-24 | 1.000000 |
| PAH1+H                        | 1.53414e-24 | 1.000000 | 1.53414e-24 | 1.000000 |
| rad54                         | 1.00912e-24 | 1.000000 | 1.00912e-24 | 1.000000 |
| rad34                         | 8.17398e-25 | 1.000000 | 8.17398e-25 | 1.000000 |
| rad52                         | 5.37450e-25 | 1.000000 | 5.37450e-25 | 1.000000 |
| rad51                         | 1.02512e-25 | 1.000000 | 1.02512e-25 | 1.000000 |
| rad41                         | 1.28991e-26 | 1.000000 | 1.28991e-26 | 1.000000 |
| rad55                         | 5.03711e-27 | 1.000000 | 5.03711e-27 | 1.000000 |
| rad47                         | 8.49998e-28 | 1.000000 | 8.49998e-28 | 1.000000 |
| rad42                         | 5.20051e-29 | 1.000000 | 5.20051e-29 | 1.000000 |
| rad65                         | 1.33638e-29 | 1.000000 | 1.33638e-29 | 1.000000 |
| Benzene+cycloprop-1-enylidene | 2.85507e-33 | 1.000000 | 2.85507e-33 | 1.000000 |
| rad19syn                      | 3.53820e-34 | 1.000000 | 3.53820e-34 | 1.000000 |
| rad53                         | 2.35276e-34 | 1.000000 | 2.35276e-34 | 1.000000 |
| rad61                         | 5.61473e-36 | 1.000000 | 5.61473e-36 | 1.000000 |
| rad64                         | 1.25510e-38 | 1.000000 | 1.25510e-38 | 1.000000 |
| rad68syn                      | 1.14584e-38 | 1.000000 | 1.14584e-38 | 1.000000 |
| rad68anti                     | 9.34905e-39 | 1.000000 | 9.34905e-39 | 1.000000 |
| rad56                         | 7.80796e-41 | 1.000000 | 7.80796e-41 | 1.000000 |
| rad40syn                      | 3.98328e-44 | 1.000000 | 3.98328e-44 | 1.000000 |
| rad40anti                     | 3.08928e-44 | 1.000000 | 3.08928e-44 | 1.000000 |
| rad73                         | 5.83169e-46 | 1.000000 | 5.83169e-46 | 1.000000 |
| PAH8+H                        | 7.59449e-47 | 1.000000 | 7.59449e-47 | 1.000000 |
| rad71                         | 2.21954e-51 | 1.000000 | 2.21954e-51 | 1.000000 |

100000.000 Pa, 60.0000000 K

| Rate constant             | True (fraction)        | Effective (fraction)   |
|---------------------------|------------------------|------------------------|
| Total                     | 6.93738e-17 (1.00 )    | 6.93738e-17 (1.00 )    |
| Formation of rad19        | 6.93738e-17 (1.000 )   | 6.93738e-17 (1.000 )   |
| H-abstraction to cyc2enyl | 2.50609e-31 (3.61e-15) | 2.50609e-31 (3.61e-15) |
| H-abstraction to cyclenyl | 7.62015e-44 (1.10e-27) | 7.62015e-44 (1.10e-27) |

| species                       | PYtrue      | Cumul    | PYeffective | Cumul    |
|-------------------------------|-------------|----------|-------------|----------|
| rad9                          | 0.994626    | 0.994626 | 0.994626    | 0.994626 |
| rad15                         | 0.00302243  | 0.997648 | 0.00302243  | 0.997648 |
| rad19anti                     | 0.00202138  | 0.999670 | 0.00202138  | 0.999670 |
| Indene+H                      | 0.000329619 | 0.999999 | 0.000329619 | 0.999999 |
| rad12                         | 2.23754e-07 | 1.000000 | 2.23754e-07 | 1.000000 |
| PhCHCCH2+H                    | 6.31621e-08 | 1.000000 | 6.31621e-08 | 1.000000 |
| rad11                         | 2.96871e-09 | 1.000000 | 2.96871e-09 | 1.000000 |
| rad2                          | 2.40980e-09 | 1.000000 | 2.40980e-09 | 1.000000 |
| rad18                         | 1.51666e-09 | 1.000000 | 1.51666e-09 | 1.000000 |
| rad26                         | 3.62922e-10 | 1.000000 | 3.62922e-10 | 1.000000 |
| rad6                          | 2.03418e-10 | 1.000000 | 2.03418e-10 | 1.000000 |
| rad1                          | 1.83167e-10 | 1.000000 | 1.83167e-10 | 1.000000 |
| rad22                         | 1.80365e-10 | 1.000000 | 1.80365e-10 | 1.000000 |
| rad20                         | 7.45866e-11 | 1.000000 | 7.45866e-11 | 1.000000 |
| rad7                          | 7.28593e-11 | 1.000000 | 7.28593e-11 | 1.000000 |
| rad21                         | 5.14294e-11 | 1.000000 | 5.14294e-11 | 1.000000 |
| rad67                         | 3.64701e-11 | 1.000000 | 3.64701e-11 | 1.000000 |
| rad45                         | 2.86747e-11 | 1.000000 | 2.86747e-11 | 1.000000 |
| C2H2+PhCH2                    | 2.21419e-11 | 1.000000 | 2.21419e-11 | 1.000000 |
| rad35                         | 1.66908e-11 | 1.000000 | 1.66908e-11 | 1.000000 |
| rad10                         | 5.02745e-12 | 1.000000 | 5.02745e-12 | 1.000000 |
| rad23                         | 1.88268e-12 | 1.000000 | 1.88268e-12 | 1.000000 |
| rad36                         | 1.86335e-12 | 1.000000 | 1.86335e-12 | 1.000000 |
| rad3                          | 1.32965e-12 | 1.000000 | 1.32965e-12 | 1.000000 |
| rad4                          | 7.19109e-13 | 1.000000 | 7.19109e-13 | 1.000000 |
| rad5                          | 5.15146e-13 | 1.000000 | 5.15146e-13 | 1.000000 |
| PhcycC3H3_A+H                 | 3.72197e-13 | 1.000000 | 3.72197e-13 | 1.000000 |
| PhCCCH3+H                     | 3.32805e-13 | 1.000000 | 3.32805e-13 | 1.000000 |
| Ph+MeAc                       | 1.96260e-13 | 1.000000 | 1.96260e-13 | 1.000000 |
| rad30                         | 9.98294e-14 | 1.000000 | 9.98294e-14 | 1.000000 |
| rad25                         | 8.44058e-14 | 1.000000 | 8.44058e-14 | 1.000000 |
| Ph+Allene                     | 8.41751e-14 | 1.000000 | 8.41751e-14 | 1.000000 |
| rad27                         | 3.38429e-14 | 1.000000 | 3.38429e-14 | 1.000000 |
| PhCCH+CH3                     | 1.65143e-14 | 1.000000 | 1.65143e-14 | 1.000000 |
| PhCH2CCH+H                    | 1.26784e-14 | 1.000000 | 1.26784e-14 | 1.000000 |
| rad13                         | 8.35875e-15 | 1.000000 | 8.35875e-15 | 1.000000 |
| Benzene+cycloprop-2-enylidene | 3.61245e-15 | 1.000000 | 3.61245e-15 | 1.000000 |
| rad24                         | 2.18772e-15 | 1.000000 | 2.18772e-15 | 1.000000 |
| Phenyl+cycC3H4                | 4.45360e-16 | 1.000000 | 0.00000     | 1.000000 |
| rad60syn                      | 2.81537e-16 | 1.000000 | 2.81537e-16 | 1.000000 |
| rad14                         | 1.44207e-16 | 1.000000 | 1.44207e-16 | 1.000000 |

|                               |             |          |             |          |
|-------------------------------|-------------|----------|-------------|----------|
| rad37                         | 1.43904e-16 | 1.000000 | 1.43904e-16 | 1.000000 |
| rad60anti                     | 1.33190e-16 | 1.000000 | 1.33190e-16 | 1.000000 |
| PAH3+H                        | 7.81518e-17 | 1.000000 | 7.81518e-17 | 1.000000 |
| rad28                         | 6.44733e-17 | 1.000000 | 6.44733e-17 | 1.000000 |
| rad33                         | 2.57263e-17 | 1.000000 | 2.57263e-17 | 1.000000 |
| rad59                         | 1.68857e-17 | 1.000000 | 1.68857e-17 | 1.000000 |
| PAH7+H                        | 1.23943e-17 | 1.000000 | 1.23943e-17 | 1.000000 |
| rad38                         | 1.50021e-18 | 1.000000 | 1.50021e-18 | 1.000000 |
| PhcycC3H3_B+H                 | 2.25552e-19 | 1.000000 | 2.25552e-19 | 1.000000 |
| PAH10+CH3                     | 9.64228e-20 | 1.000000 | 9.64228e-20 | 1.000000 |
| rad46                         | 6.60036e-20 | 1.000000 | 6.60036e-20 | 1.000000 |
| rad31                         | 5.89784e-20 | 1.000000 | 5.89784e-20 | 1.000000 |
| PAH9+H                        | 4.15508e-20 | 1.000000 | 4.15508e-20 | 1.000000 |
| rad43                         | 4.78735e-21 | 1.000000 | 4.78735e-21 | 1.000000 |
| rad58                         | 4.55903e-22 | 1.000000 | 4.55903e-22 | 1.000000 |
| rad70                         | 2.66318e-22 | 1.000000 | 2.66318e-22 | 1.000000 |
| rad50                         | 2.49150e-22 | 1.000000 | 2.49150e-22 | 1.000000 |
| rad39                         | 7.03989e-23 | 1.000000 | 7.03989e-23 | 1.000000 |
| rad62                         | 5.38871e-24 | 1.000000 | 5.38871e-24 | 1.000000 |
| PAH1+H                        | 3.18293e-24 | 1.000000 | 3.18293e-24 | 1.000000 |
| rad54                         | 2.42350e-24 | 1.000000 | 2.42350e-24 | 1.000000 |
| rad34                         | 2.00735e-24 | 1.000000 | 2.00735e-24 | 1.000000 |
| rad52                         | 1.20494e-24 | 1.000000 | 1.20494e-24 | 1.000000 |
| rad8                          | 9.92104e-25 | 1.000000 | 9.92104e-25 | 1.000000 |
| rad51                         | 2.36074e-25 | 1.000000 | 2.36074e-25 | 1.000000 |
| rad41                         | 3.45746e-26 | 1.000000 | 3.45746e-26 | 1.000000 |
| rad55                         | 1.25676e-26 | 1.000000 | 1.25676e-26 | 1.000000 |
| rad47                         | 1.69667e-27 | 1.000000 | 1.69667e-27 | 1.000000 |
| Benzene+cycloprop-1-enylidene | 1.09842e-27 | 1.000000 | 1.09842e-27 | 1.000000 |
| rad42                         | 1.79172e-28 | 1.000000 | 1.79172e-28 | 1.000000 |
| rad65                         | 4.02053e-29 | 1.000000 | 4.02053e-29 | 1.000000 |
| rad53                         | 9.76945e-34 | 1.000000 | 9.76945e-34 | 1.000000 |
| rad19syn                      | 4.46513e-34 | 1.000000 | 4.46513e-34 | 1.000000 |
| rad61                         | 2.40075e-35 | 1.000000 | 2.40075e-35 | 1.000000 |
| rad68syn                      | 5.99647e-38 | 1.000000 | 5.99647e-38 | 1.000000 |
| rad64                         | 5.62692e-38 | 1.000000 | 5.62692e-38 | 1.000000 |
| rad68anti                     | 4.88795e-38 | 1.000000 | 4.88795e-38 | 1.000000 |
| rad56                         | 4.32212e-40 | 1.000000 | 4.32212e-40 | 1.000000 |
| rad40syn                      | 2.79592e-43 | 1.000000 | 2.79592e-43 | 1.000000 |
| rad40anti                     | 2.17462e-43 | 1.000000 | 2.17462e-43 | 1.000000 |
| rad73                         | 3.99256e-45 | 1.000000 | 3.99256e-45 | 1.000000 |
| PAH8+H                        | 5.84234e-46 | 1.000000 | 5.84234e-46 | 1.000000 |
| rad71                         | 1.84961e-50 | 1.000000 | 1.84961e-50 | 1.000000 |

100000.000 Pa, 70.0000000 K

| Rate constant             | True (fraction)        | Effective (fraction)   |
|---------------------------|------------------------|------------------------|
| Total                     | 1.91520e-16 (1.00 )    | 1.91520e-16 (1.00 )    |
| Formation of rad19        | 1.91520e-16 (1.000 )   | 1.91520e-16 (1.000 )   |
| H-abstraction to cyc2enyl | 1.01125e-28 (5.28e-13) | 1.01125e-28 (5.28e-13) |
| H-abstraction to cyclenyl | 1.97822e-39 (1.03e-23) | 1.97822e-39 (1.03e-23) |

| species    | PYtrue      | Cumul    | PYeffective | Cumul    |
|------------|-------------|----------|-------------|----------|
| rad9       | 0.995437    | 0.995437 | 0.995437    | 0.995437 |
| rad15      | 0.00324713  | 0.998684 | 0.00324713  | 0.998684 |
| rad19anti  | 0.000866393 | 0.999551 | 0.000866393 | 0.999551 |
| Indene+H   | 0.000449332 | 1.000000 | 0.000449332 | 1.000000 |
| rad12      | 1.90543e-07 | 1.000000 | 1.90543e-07 | 1.000000 |
| PhCHCCH2+H | 8.10862e-08 | 1.000000 | 8.10862e-08 | 1.000000 |
| rad11      | 3.77046e-09 | 1.000000 | 3.77046e-09 | 1.000000 |
| rad2       | 3.11003e-09 | 1.000000 | 3.11003e-09 | 1.000000 |
| rad18      | 1.89515e-09 | 1.000000 | 1.89515e-09 | 1.000000 |
| rad26      | 4.69193e-10 | 1.000000 | 4.69193e-10 | 1.000000 |
| rad6       | 3.09580e-10 | 1.000000 | 3.09580e-10 | 1.000000 |
| rad22      | 2.79213e-10 | 1.000000 | 2.79213e-10 | 1.000000 |
| rad1       | 2.33040e-10 | 1.000000 | 2.33040e-10 | 1.000000 |
| rad20      | 9.45186e-11 | 1.000000 | 9.45186e-11 | 1.000000 |
| rad7       | 7.45799e-11 | 1.000000 | 7.45799e-11 | 1.000000 |
| rad21      | 6.50574e-11 | 1.000000 | 6.50574e-11 | 1.000000 |
| rad67      | 5.38911e-11 | 1.000000 | 5.38911e-11 | 1.000000 |
| rad45      | 4.35014e-11 | 1.000000 | 4.35014e-11 | 1.000000 |
| C2H2+PhCH2 | 3.68249e-11 | 1.000000 | 3.68249e-11 | 1.000000 |
| rad35      | 2.45993e-11 | 1.000000 | 2.45993e-11 | 1.000000 |
| rad10      | 7.85578e-12 | 1.000000 | 7.85578e-12 | 1.000000 |
| rad23      | 3.46946e-12 | 1.000000 | 3.46946e-12 | 1.000000 |
| rad36      | 2.80389e-12 | 1.000000 | 2.80389e-12 | 1.000000 |
| rad3       | 2.08119e-12 | 1.000000 | 2.08119e-12 | 1.000000 |
| rad4       | 1.11957e-12 | 1.000000 | 1.11957e-12 | 1.000000 |

|                               |             |         |             |         |
|-------------------------------|-------------|---------|-------------|---------|
| rad5                          | 6.45718e-13 | 1.00000 | 6.45718e-13 | 1.00000 |
| PhCCCH3+H                     | 5.31317e-13 | 1.00000 | 5.31317e-13 | 1.00000 |
| Benzene+cycloprop-2-enylidene | 5.28015e-13 | 1.00000 | 5.28015e-13 | 1.00000 |
| PhcycC3H3_A+H                 | 4.87844e-13 | 1.00000 | 4.87844e-13 | 1.00000 |
| Ph+MeAc                       | 3.16149e-13 | 1.00000 | 3.16149e-13 | 1.00000 |
| rad30                         | 1.67114e-13 | 1.00000 | 1.67114e-13 | 1.00000 |
| Ph+Allene                     | 1.34595e-13 | 1.00000 | 1.34595e-13 | 1.00000 |
| rad25                         | 1.21225e-13 | 1.00000 | 1.21225e-13 | 1.00000 |
| rad27                         | 4.78732e-14 | 1.00000 | 4.78732e-14 | 1.00000 |
| PhCCH+CH3                     | 3.01881e-14 | 1.00000 | 3.01881e-14 | 1.00000 |
| PhCH2CCH+H                    | 2.05308e-14 | 1.00000 | 2.05308e-14 | 1.00000 |
| rad13                         | 1.22168e-14 | 1.00000 | 1.22168e-14 | 1.00000 |
| rad24                         | 2.19129e-15 | 1.00000 | 2.19129e-15 | 1.00000 |
| Phenyl+cycC3H4                | 7.86796e-16 | 1.00000 | 0.00000     | 1.00000 |
| rad60syn                      | 4.84805e-16 | 1.00000 | 4.84805e-16 | 1.00000 |
| rad14                         | 2.67885e-16 | 1.00000 | 2.67885e-16 | 1.00000 |
| rad37                         | 2.34127e-16 | 1.00000 | 2.34127e-16 | 1.00000 |
| rad60anti                     | 2.29884e-16 | 1.00000 | 2.29884e-16 | 1.00000 |
| PAH3+H                        | 1.38586e-16 | 1.00000 | 1.38586e-16 | 1.00000 |
| rad28                         | 1.09642e-16 | 1.00000 | 1.09642e-16 | 1.00000 |
| rad33                         | 3.47023e-17 | 1.00000 | 3.47023e-17 | 1.00000 |
| rad59                         | 2.98322e-17 | 1.00000 | 2.98322e-17 | 1.00000 |
| PAH7+H                        | 2.29337e-17 | 1.00000 | 2.29337e-17 | 1.00000 |
| rad38                         | 2.73745e-18 | 1.00000 | 2.73745e-18 | 1.00000 |
| PhcycC3H3_B+H                 | 7.77422e-19 | 1.00000 | 7.77422e-19 | 1.00000 |
| PAH10+CH3                     | 1.66413e-19 | 1.00000 | 1.66413e-19 | 1.00000 |
| rad46                         | 1.23777e-19 | 1.00000 | 1.23777e-19 | 1.00000 |
| PAH9+H                        | 9.50404e-20 | 1.00000 | 9.50404e-20 | 1.00000 |
| rad31                         | 7.39685e-20 | 1.00000 | 7.39685e-20 | 1.00000 |
| rad43                         | 9.41745e-21 | 1.00000 | 9.41745e-21 | 1.00000 |
| rad58                         | 8.88540e-22 | 1.00000 | 8.88540e-22 | 1.00000 |
| rad70                         | 5.42516e-22 | 1.00000 | 5.42516e-22 | 1.00000 |
| rad50                         | 4.81642e-22 | 1.00000 | 4.81642e-22 | 1.00000 |
| rad39                         | 1.46536e-22 | 1.00000 | 1.46536e-22 | 1.00000 |
| rad62                         | 1.35075e-23 | 1.00000 | 1.35075e-23 | 1.00000 |
| Benzene+cycloprop-1-enylidene | 1.03290e-23 | 1.00000 | 1.03290e-23 | 1.00000 |
| PAH1+H                        | 6.02242e-24 | 1.00000 | 6.02242e-24 | 1.00000 |
| rad54                         | 5.09004e-24 | 1.00000 | 5.09004e-24 | 1.00000 |
| rad34                         | 4.34809e-24 | 1.00000 | 4.34809e-24 | 1.00000 |
| rad52                         | 2.38599e-24 | 1.00000 | 2.38599e-24 | 1.00000 |
| rad51                         | 4.80824e-25 | 1.00000 | 4.80824e-25 | 1.00000 |
| rad41                         | 8.22730e-26 | 1.00000 | 8.22730e-26 | 1.00000 |
| rad8                          | 4.96304e-26 | 1.00000 | 4.96304e-26 | 1.00000 |
| rad55                         | 2.74935e-26 | 1.00000 | 2.74935e-26 | 1.00000 |
| rad47                         | 3.00218e-27 | 1.00000 | 3.00218e-27 | 1.00000 |
| rad42                         | 5.29442e-28 | 1.00000 | 5.29442e-28 | 1.00000 |
| rad65                         | 1.02794e-28 | 1.00000 | 1.02794e-28 | 1.00000 |
| rad53                         | 3.82031e-33 | 1.00000 | 3.82031e-33 | 1.00000 |
| rad19syn                      | 6.58584e-34 | 1.00000 | 6.58584e-34 | 1.00000 |
| rad61                         | 1.10277e-34 | 1.00000 | 1.10277e-34 | 1.00000 |
| rad68syn                      | 3.33098e-37 | 1.00000 | 3.33098e-37 | 1.00000 |
| rad68anti                     | 2.71199e-37 | 1.00000 | 2.71199e-37 | 1.00000 |
| rad64                         | 2.46708e-37 | 1.00000 | 2.46708e-37 | 1.00000 |
| rad56                         | 2.46391e-39 | 1.00000 | 2.46391e-39 | 1.00000 |
| rad40syn                      | 2.18162e-42 | 1.00000 | 2.18162e-42 | 1.00000 |
| rad40anti                     | 1.70182e-42 | 1.00000 | 1.70182e-42 | 1.00000 |
| rad73                         | 2.95496e-44 | 1.00000 | 2.95496e-44 | 1.00000 |
| PAH8+H                        | 5.11911e-45 | 1.00000 | 5.11911e-45 | 1.00000 |
| rad71                         | 1.73780e-49 | 1.00000 | 1.73780e-49 | 1.00000 |

100000.000 Pa, 80.0000000 K

=====

| Rate constant             | True (fraction)        | Effective (fraction)   |
|---------------------------|------------------------|------------------------|
| Total                     | 4.17084e-16 (1.00 )    | 4.17084e-16 (1.00 )    |
| Formation of rad19        | 4.17084e-16 (1.00 )    | 4.17084e-16 (1.00 )    |
| H-abstraction to cyc2enyl | 8.98751e-27 (2.15e-11) | 8.98751e-27 (2.15e-11) |
| H-abstraction to cyclenyl | 4.00120e-36 (9.59e-21) | 4.00120e-36 (9.59e-21) |

| species    | PYtrue      | Cumul    | PYeffective | Cumul    |
|------------|-------------|----------|-------------|----------|
| rad9       | 0.995618    | 0.995618 | 0.995618    | 0.995618 |
| rad15      | 0.00340097  | 0.999019 | 0.00340097  | 0.999019 |
| Indene+H   | 0.000577972 | 0.999597 | 0.000577972 | 0.999597 |
| rad19anti  | 0.000402873 | 1.000000 | 0.000402873 | 1.000000 |
| rad12      | 1.67184e-07 | 1.000000 | 1.67184e-07 | 1.000000 |
| PhCHCCH2+H | 1.00353e-07 | 1.000000 | 1.00353e-07 | 1.000000 |
| rad11      | 4.61514e-09 | 1.000000 | 4.61514e-09 | 1.000000 |
| rad2       | 3.86765e-09 | 1.000000 | 3.86765e-09 | 1.000000 |
| rad18      | 2.23372e-09 | 1.000000 | 2.23372e-09 | 1.000000 |

|                               |             |         |             |         |
|-------------------------------|-------------|---------|-------------|---------|
| rad26                         | 5.84090e-10 | 1.00000 | 5.84090e-10 | 1.00000 |
| rad6                          | 4.43599e-10 | 1.00000 | 4.43599e-10 | 1.00000 |
| rad22                         | 4.02418e-10 | 1.00000 | 4.02418e-10 | 1.00000 |
| rad1                          | 2.86767e-10 | 1.00000 | 2.86767e-10 | 1.00000 |
| rad20                         | 1.13761e-10 | 1.00000 | 1.13761e-10 | 1.00000 |
| rad21                         | 7.83754e-11 | 1.00000 | 7.83754e-11 | 1.00000 |
| rad7                          | 7.65658e-11 | 1.00000 | 7.65658e-11 | 1.00000 |
| rad67                         | 7.48680e-11 | 1.00000 | 7.48680e-11 | 1.00000 |
| rad45                         | 6.21338e-11 | 1.00000 | 6.21338e-11 | 1.00000 |
| C2H2+PhCH2                    | 5.65358e-11 | 1.00000 | 5.65358e-11 | 1.00000 |
| rad35                         | 3.40870e-11 | 1.00000 | 3.40870e-11 | 1.00000 |
| Benzene+cycloprop-2-enylidene | 2.15484e-11 | 1.00000 | 2.15484e-11 | 1.00000 |
| rad10                         | 1.15160e-11 | 1.00000 | 1.15160e-11 | 1.00000 |
| rad23                         | 5.84158e-12 | 1.00000 | 5.84158e-12 | 1.00000 |
| rad36                         | 3.98096e-12 | 1.00000 | 3.98096e-12 | 1.00000 |
| rad3                          | 3.05440e-12 | 1.00000 | 3.05440e-12 | 1.00000 |
| rad4                          | 1.63642e-12 | 1.00000 | 1.63642e-12 | 1.00000 |
| PhCCCH3+H                     | 7.96352e-13 | 1.00000 | 7.96352e-13 | 1.00000 |
| rad5                          | 7.95701e-13 | 1.00000 | 7.95701e-13 | 1.00000 |
| PhcycC3H3_A+H                 | 6.33212e-13 | 1.00000 | 6.33212e-13 | 1.00000 |
| Ph+MeAc                       | 4.78356e-13 | 1.00000 | 4.78356e-13 | 1.00000 |
| rad30                         | 2.56507e-13 | 1.00000 | 2.56507e-13 | 1.00000 |
| Ph+Allene                     | 2.02033e-13 | 1.00000 | 2.02033e-13 | 1.00000 |
| rad25                         | 1.63499e-13 | 1.00000 | 1.63499e-13 | 1.00000 |
| rad27                         | 6.37202e-14 | 1.00000 | 6.37202e-14 | 1.00000 |
| PhCCH+CH3                     | 5.14291e-14 | 1.00000 | 5.14291e-14 | 1.00000 |
| PhCH2CCH+H                    | 3.12229e-14 | 1.00000 | 3.12229e-14 | 1.00000 |
| rad13                         | 1.68087e-14 | 1.00000 | 1.68087e-14 | 1.00000 |
| rad24                         | 2.16316e-15 | 1.00000 | 2.16316e-15 | 1.00000 |
| Phenyl+cycC3H4                | 1.32270e-15 | 1.00000 | 0.00000     | 1.00000 |
| rad60syn                      | 7.65403e-16 | 1.00000 | 7.65403e-16 | 1.00000 |
| rad14                         | 4.54819e-16 | 1.00000 | 4.54819e-16 | 1.00000 |
| rad60anti                     | 3.63782e-16 | 1.00000 | 3.63782e-16 | 1.00000 |
| rad37                         | 3.57067e-16 | 1.00000 | 3.57067e-16 | 1.00000 |
| PAH3+H                        | 2.25408e-16 | 1.00000 | 2.25408e-16 | 1.00000 |
| rad28                         | 1.74567e-16 | 1.00000 | 1.74567e-16 | 1.00000 |
| rad59                         | 4.83363e-17 | 1.00000 | 4.83363e-17 | 1.00000 |
| rad33                         | 4.48821e-17 | 1.00000 | 4.48821e-17 | 1.00000 |
| PAH7+H                        | 3.89598e-17 | 1.00000 | 3.89598e-17 | 1.00000 |
| rad38                         | 4.62167e-18 | 1.00000 | 4.62167e-18 | 1.00000 |
| PhcycC3H3_B+H                 | 3.06467e-18 | 1.00000 | 3.06467e-18 | 1.00000 |
| PAH10+CH3                     | 2.69974e-19 | 1.00000 | 2.69974e-19 | 1.00000 |
| rad46                         | 2.13892e-19 | 1.00000 | 2.13892e-19 | 1.00000 |
| PAH9+H                        | 1.94041e-19 | 1.00000 | 1.94041e-19 | 1.00000 |
| rad31                         | 9.05704e-20 | 1.00000 | 9.05704e-20 | 1.00000 |
| rad43                         | 1.70305e-20 | 1.00000 | 1.70305e-20 | 1.00000 |
| Benzene+cycloprop-1-enylidene | 9.59328e-21 | 1.00000 | 9.59328e-21 | 1.00000 |
| rad58                         | 1.59403e-21 | 1.00000 | 1.59403e-21 | 1.00000 |
| rad70                         | 1.01705e-21 | 1.00000 | 1.01705e-21 | 1.00000 |
| rad50                         | 8.59395e-22 | 1.00000 | 8.59395e-22 | 1.00000 |
| rad39                         | 2.79643e-22 | 1.00000 | 2.79643e-22 | 1.00000 |
| rad62                         | 3.04184e-23 | 1.00000 | 3.04184e-23 | 1.00000 |
| PAH1+H                        | 1.07707e-23 | 1.00000 | 1.07707e-23 | 1.00000 |
| rad54                         | 9.80061e-24 | 1.00000 | 9.80061e-24 | 1.00000 |
| rad34                         | 8.69941e-24 | 1.00000 | 8.69941e-24 | 1.00000 |
| rad52                         | 4.36611e-24 | 1.00000 | 4.36611e-24 | 1.00000 |
| rad51                         | 9.06648e-25 | 1.00000 | 9.06648e-25 | 1.00000 |
| rad41                         | 1.81673e-25 | 1.00000 | 1.81673e-25 | 1.00000 |
| rad55                         | 5.52777e-26 | 1.00000 | 5.52777e-26 | 1.00000 |
| rad47                         | 4.91399e-27 | 1.00000 | 4.91399e-27 | 1.00000 |
| rad8                          | 4.33089e-27 | 1.00000 | 4.33089e-27 | 1.00000 |
| rad42                         | 1.42152e-27 | 1.00000 | 1.42152e-27 | 1.00000 |
| rad65                         | 2.36844e-28 | 1.00000 | 2.36844e-28 | 1.00000 |
| rad53                         | 1.45255e-32 | 1.00000 | 1.45255e-32 | 1.00000 |
| rad19syn                      | 1.07216e-33 | 1.00000 | 1.07216e-33 | 1.00000 |
| rad61                         | 5.68033e-34 | 1.00000 | 5.68033e-34 | 1.00000 |
| rad68syn                      | 2.07638e-36 | 1.00000 | 2.07638e-36 | 1.00000 |
| rad68anti                     | 1.68808e-36 | 1.00000 | 1.68808e-36 | 1.00000 |
| rad64                         | 1.09725e-36 | 1.00000 | 1.09725e-36 | 1.00000 |
| rad56                         | 1.53689e-38 | 1.00000 | 1.53689e-38 | 1.00000 |
| rad40syn                      | 1.97235e-41 | 1.00000 | 1.97235e-41 | 1.00000 |
| rad40anti                     | 1.54294e-41 | 1.00000 | 1.54294e-41 | 1.00000 |
| rad73                         | 2.49398e-43 | 1.00000 | 2.49398e-43 | 1.00000 |
| PAH8+H                        | 5.32686e-44 | 1.00000 | 5.32686e-44 | 1.00000 |
| rad71                         | 1.93852e-48 | 1.00000 | 1.93852e-48 | 1.00000 |

100000.000 Pa, 90.0000000 K

=====

Rate constant | True (fraction) | Effective (fraction)

-----



|                           |                        |                        |
|---------------------------|------------------------|------------------------|
| Total                     | 7.74016e-16 (1.00 )    | 7.74016e-16 (1.00 )    |
| Formation of rad19        | 7.74016e-16 (1.000 )   | 7.74016e-16 (1.000 )   |
| H-abstraction to cyc2enyl | 2.91736e-25 (3.77e-10) | 2.91736e-25 (3.77e-10) |
| H-abstraction to cyclenyl | 1.47814e-33 (1.91e-18) | 1.47814e-33 (1.91e-18) |

| species                       | PYtrue      | Cumul    | PYeffective | Cumul    |
|-------------------------------|-------------|----------|-------------|----------|
| rad9                          | 0.995580    | 0.995580 | 0.995580    | 0.995580 |
| rad15                         | 0.00350481  | 0.999085 | 0.00350481  | 0.999085 |
| Indene+H                      | 0.000714214 | 0.999799 | 0.000714214 | 0.999799 |
| rad19anti                     | 0.000201060 | 1.00000  | 0.000201060 | 1.00000  |
| rad12                         | 1.49867e-07 | 1.00000  | 1.49867e-07 | 1.00000  |
| PhCHCCH2+H                    | 1.21128e-07 | 1.00000  | 1.21128e-07 | 1.00000  |
| rad11                         | 5.50762e-09 | 1.00000  | 5.50762e-09 | 1.00000  |
| rad2                          | 4.68962e-09 | 1.00000  | 4.68962e-09 | 1.00000  |
| rad18                         | 2.52902e-09 | 1.00000  | 2.52902e-09 | 1.00000  |
| rad26                         | 7.08646e-10 | 1.00000  | 7.08646e-10 | 1.00000  |
| rad6                          | 6.09301e-10 | 1.00000  | 6.09301e-10 | 1.00000  |
| rad22                         | 5.50796e-10 | 1.00000  | 5.50796e-10 | 1.00000  |
| Benzene+cycloprop-2-enylidene | 3.76912e-10 | 1.00000  | 3.76912e-10 | 1.00000  |
| rad1                          | 3.44973e-10 | 1.00000  | 3.44973e-10 | 1.00000  |
| rad20                         | 1.31845e-10 | 1.00000  | 1.31845e-10 | 1.00000  |
| rad67                         | 9.96795e-11 | 1.00000  | 9.96795e-11 | 1.00000  |
| rad21                         | 9.09920e-11 | 1.00000  | 9.09920e-11 | 1.00000  |
| rad45                         | 8.49126e-11 | 1.00000  | 8.49126e-11 | 1.00000  |
| C2H2+PhCH2                    | 8.20284e-11 | 1.00000  | 8.20284e-11 | 1.00000  |
| rad7                          | 7.88066e-11 | 1.00000  | 7.88066e-11 | 1.00000  |
| rad35                         | 4.52681e-11 | 1.00000  | 4.52681e-11 | 1.00000  |
| rad10                         | 1.61522e-11 | 1.00000  | 1.61522e-11 | 1.00000  |
| rad23                         | 9.21873e-12 | 1.00000  | 9.21873e-12 | 1.00000  |
| rad36                         | 5.41592e-12 | 1.00000  | 5.41592e-12 | 1.00000  |
| rad3                          | 4.28723e-12 | 1.00000  | 4.28723e-12 | 1.00000  |
| rad4                          | 2.28964e-12 | 1.00000  | 2.28964e-12 | 1.00000  |
| PhCCCH3+H                     | 1.14306e-12 | 1.00000  | 1.14306e-12 | 1.00000  |
| rad5                          | 9.68437e-13 | 1.00000  | 9.68437e-13 | 1.00000  |
| PhcycC3H3_A+H                 | 8.17629e-13 | 1.00000  | 8.17629e-13 | 1.00000  |
| Ph+MeAc                       | 6.93497e-13 | 1.00000  | 6.93497e-13 | 1.00000  |
| rad30                         | 3.70714e-13 | 1.00000  | 3.70714e-13 | 1.00000  |
| Ph+Allene                     | 2.90406e-13 | 1.00000  | 2.90406e-13 | 1.00000  |
| rad25                         | 2.11086e-13 | 1.00000  | 2.11086e-13 | 1.00000  |
| PhCCH+CH3                     | 8.32966e-14 | 1.00000  | 8.32966e-14 | 1.00000  |
| rad27                         | 8.13369e-14 | 1.00000  | 8.13369e-14 | 1.00000  |
| PhCH2CCH+H                    | 4.54943e-14 | 1.00000  | 4.54943e-14 | 1.00000  |
| rad13                         | 2.22053e-14 | 1.00000  | 2.22053e-14 | 1.00000  |
| Phenyl+cycC3H4                | 2.14046e-15 | 1.00000  | 0.00000     | 1.00000  |
| rad24                         | 2.11144e-15 | 1.00000  | 2.11144e-15 | 1.00000  |
| rad60syn                      | 1.13793e-15 | 1.00000  | 1.13793e-15 | 1.00000  |
| rad14                         | 7.25298e-16 | 1.00000  | 7.25298e-16 | 1.00000  |
| rad60anti                     | 5.42112e-16 | 1.00000  | 5.42112e-16 | 1.00000  |
| rad37                         | 5.21122e-16 | 1.00000  | 5.21122e-16 | 1.00000  |
| PAH3+H                        | 3.45449e-16 | 1.00000  | 3.45449e-16 | 1.00000  |
| rad28                         | 2.65592e-16 | 1.00000  | 2.65592e-16 | 1.00000  |
| rad59                         | 7.37843e-17 | 1.00000  | 7.37843e-17 | 1.00000  |
| PAH7+H                        | 6.23884e-17 | 1.00000  | 6.23884e-17 | 1.00000  |
| rad33                         | 5.64255e-17 | 1.00000  | 5.64255e-17 | 1.00000  |
| PhcycC3H3_B+H                 | 1.17265e-17 | 1.00000  | 1.17265e-17 | 1.00000  |
| rad38                         | 7.39144e-18 | 1.00000  | 7.39144e-18 | 1.00000  |
| Benzene+cycloprop-1-enylidene | 1.90970e-18 | 1.00000  | 1.90970e-18 | 1.00000  |
| PAH10+CH3                     | 4.20514e-19 | 1.00000  | 4.20514e-19 | 1.00000  |
| PAH9+H                        | 3.65823e-19 | 1.00000  | 3.65823e-19 | 1.00000  |
| rad46                         | 3.49245e-19 | 1.00000  | 3.49245e-19 | 1.00000  |
| rad31                         | 1.09150e-19 | 1.00000  | 1.09150e-19 | 1.00000  |
| rad43                         | 2.91038e-20 | 1.00000  | 2.91038e-20 | 1.00000  |
| rad58                         | 2.70475e-21 | 1.00000  | 2.70475e-21 | 1.00000  |
| rad70                         | 1.80375e-21 | 1.00000  | 1.80375e-21 | 1.00000  |
| rad50                         | 1.45240e-21 | 1.00000  | 1.45240e-21 | 1.00000  |
| rad39                         | 5.03351e-22 | 1.00000  | 5.03351e-22 | 1.00000  |
| rad62                         | 6.37724e-23 | 1.00000  | 6.37724e-23 | 1.00000  |
| PAH1+H                        | 1.86000e-23 | 1.00000  | 1.86000e-23 | 1.00000  |
| rad54                         | 1.78009e-23 | 1.00000  | 1.78009e-23 | 1.00000  |
| rad34                         | 1.65238e-23 | 1.00000  | 1.65238e-23 | 1.00000  |
| rad52                         | 7.58015e-24 | 1.00000  | 7.58015e-24 | 1.00000  |
| rad51                         | 1.62558e-24 | 1.00000  | 1.62558e-24 | 1.00000  |
| rad41                         | 3.82216e-25 | 1.00000  | 3.82216e-25 | 1.00000  |
| rad55                         | 1.05118e-25 | 1.00000  | 1.05118e-25 | 1.00000  |
| rad47                         | 7.62359e-27 | 1.00000  | 7.62359e-27 | 1.00000  |
| rad42                         | 3.58987e-27 | 1.00000  | 3.58987e-27 | 1.00000  |
| rad8                          | 5.68779e-28 | 1.00000  | 5.68779e-28 | 1.00000  |
| rad65                         | 5.09268e-28 | 1.00000  | 5.09268e-28 | 1.00000  |
| rad53                         | 5.39309e-32 | 1.00000  | 5.39309e-32 | 1.00000  |

|           |             |         |             |         |
|-----------|-------------|---------|-------------|---------|
| rad61     | 3.39838e-33 | 1.00000 | 3.39838e-33 | 1.00000 |
| rad19syn  | 1.87574e-33 | 1.00000 | 1.87574e-33 | 1.00000 |
| rad68syn  | 1.53824e-35 | 1.00000 | 1.53824e-35 | 1.00000 |
| rad68anti | 1.24821e-35 | 1.00000 | 1.24821e-35 | 1.00000 |
| rad64     | 4.99635e-36 | 1.00000 | 4.99635e-36 | 1.00000 |
| rad56     | 1.10754e-37 | 1.00000 | 1.10754e-37 | 1.00000 |
| rad40syn  | 2.18144e-40 | 1.00000 | 2.18144e-40 | 1.00000 |
| rad40anti | 1.71054e-40 | 1.00000 | 1.71054e-40 | 1.00000 |
| rad73     | 2.55097e-42 | 1.00000 | 2.55097e-42 | 1.00000 |
| PAH8+H    | 7.00150e-43 | 1.00000 | 7.00150e-43 | 1.00000 |
| rad71     | 2.75993e-47 | 1.00000 | 2.75993e-47 | 1.00000 |

100000.000 Pa, 100.000000 K

| Rate constant             | True (fraction)        | Effective (fraction)   |
|---------------------------|------------------------|------------------------|
| Total                     | 1.28255e-15 (1.00)     | 1.28255e-15 (1.00)     |
| Formation of rad19        | 1.28255e-15 (1.000)    | 1.28255e-15 (1.000)    |
| H-abstraction to cyc2enyl | 4.68359e-24 (3.65e-09) | 4.68359e-24 (3.65e-09) |
| H-abstraction to cyclenyl | 1.66242e-31 (1.30e-16) | 1.66242e-31 (1.30e-16) |

| species                       | PYtrue      | Cumul    | PYeffective | Cumul    |
|-------------------------------|-------------|----------|-------------|----------|
| rad9                          | 0.995462    | 0.995462 | 0.995462    | 0.995462 |
| rad15                         | 0.00357303  | 0.999035 | 0.00357303  | 0.999035 |
| Indene+H                      | 0.000857342 | 0.999892 | 0.000857342 | 0.999892 |
| rad19anti                     | 0.000106838 | 0.999999 | 0.000106838 | 0.999999 |
| PhCHCCH2+H                    | 1.43624e-07 | 0.999999 | 1.43624e-07 | 0.999999 |
| rad12                         | 1.36515e-07 | 0.999999 | 1.36515e-07 | 0.999999 |
| rad11                         | 6.45441e-09 | 0.999999 | 6.45441e-09 | 0.999999 |
| rad2                          | 5.58503e-09 | 0.999999 | 5.58503e-09 | 0.999999 |
| Benzene+cycloprop-2-enylidene | 3.65179e-09 | 1.000000 | 3.65179e-09 | 1.000000 |
| rad18                         | 2.78152e-09 | 1.000000 | 2.78152e-09 | 1.000000 |
| rad26                         | 8.44224e-10 | 1.000000 | 8.44224e-10 | 1.000000 |
| rad6                          | 8.11513e-10 | 1.000000 | 8.11513e-10 | 1.000000 |
| rad22                         | 7.25277e-10 | 1.000000 | 7.25277e-10 | 1.000000 |
| rad1                          | 4.08421e-10 | 1.000000 | 4.08421e-10 | 1.000000 |
| rad20                         | 1.48482e-10 | 1.000000 | 1.48482e-10 | 1.000000 |
| rad67                         | 1.28730e-10 | 1.000000 | 1.28730e-10 | 1.000000 |
| C2H2+PhCH2                    | 1.14174e-10 | 1.000000 | 1.14174e-10 | 1.000000 |
| rad45                         | 1.12213e-10 | 1.000000 | 1.12213e-10 | 1.000000 |
| rad21                         | 1.02665e-10 | 1.000000 | 1.02665e-10 | 1.000000 |
| rad7                          | 8.13047e-11 | 1.000000 | 8.13047e-11 | 1.000000 |
| rad35                         | 5.83117e-11 | 1.000000 | 5.83117e-11 | 1.000000 |
| rad10                         | 2.19480e-11 | 1.000000 | 2.19480e-11 | 1.000000 |
| rad23                         | 1.38624e-11 | 1.000000 | 1.38624e-11 | 1.000000 |
| rad36                         | 7.13260e-12 | 1.000000 | 7.13260e-12 | 1.000000 |
| rad3                          | 5.82782e-12 | 1.000000 | 5.82782e-12 | 1.000000 |
| rad4                          | 3.10467e-12 | 1.000000 | 3.10467e-12 | 1.000000 |
| PhCCCH3+H                     | 1.59126e-12 | 1.000000 | 1.59126e-12 | 1.000000 |
| rad5                          | 1.16824e-12 | 1.000000 | 1.16824e-12 | 1.000000 |
| PhcycC3H3_A+H                 | 1.05341e-12 | 1.000000 | 1.05341e-12 | 1.000000 |
| Ph+MeAc                       | 9.75658e-13 | 1.000000 | 9.75658e-13 | 1.000000 |
| rad30                         | 5.12956e-13 | 1.000000 | 5.12956e-13 | 1.000000 |
| Ph+Allene                     | 4.04845e-13 | 1.000000 | 4.04845e-13 | 1.000000 |
| rad25                         | 2.64015e-13 | 1.000000 | 2.64015e-13 | 1.000000 |
| PhCCH+CH3                     | 1.30037e-13 | 1.000000 | 1.30037e-13 | 1.000000 |
| rad27                         | 1.00761e-13 | 1.000000 | 1.00761e-13 | 1.000000 |
| PhCH2CCH+H                    | 6.43302e-14 | 1.000000 | 6.43302e-14 | 1.000000 |
| rad13                         | 2.85121e-14 | 1.000000 | 2.85121e-14 | 1.000000 |
| Phenyl+cycC3H4                | 3.36569e-15 | 1.000000 | 0.000000    | 1.000000 |
| rad24                         | 2.04371e-15 | 1.000000 | 2.04371e-15 | 1.000000 |
| rad60syn                      | 1.62023e-15 | 1.000000 | 1.62023e-15 | 1.000000 |
| rad14                         | 1.10538e-15 | 1.000000 | 1.10538e-15 | 1.000000 |
| rad60anti                     | 7.73729e-16 | 1.000000 | 7.73729e-16 | 1.000000 |
| rad37                         | 7.37462e-16 | 1.000000 | 7.37462e-16 | 1.000000 |
| PAH3+H                        | 5.07431e-16 | 1.000000 | 5.07431e-16 | 1.000000 |
| rad28                         | 3.91264e-16 | 1.000000 | 3.91264e-16 | 1.000000 |
| Benzene+cycloprop-1-enylidene | 1.29619e-16 | 1.000000 | 1.29619e-16 | 1.000000 |
| rad59                         | 1.07935e-16 | 1.000000 | 1.07935e-16 | 1.000000 |
| PAH7+H                        | 9.57822e-17 | 1.000000 | 9.57822e-17 | 1.000000 |
| rad33                         | 6.95446e-17 | 1.000000 | 6.95446e-17 | 1.000000 |
| PhcycC3H3_B+H                 | 3.99108e-17 | 1.000000 | 3.99108e-17 | 1.000000 |
| rad38                         | 1.13671e-17 | 1.000000 | 1.13671e-17 | 1.000000 |
| PAH9+H                        | 6.50902e-19 | 1.000000 | 6.50902e-19 | 1.000000 |
| PAH10+CH3                     | 6.37558e-19 | 1.000000 | 6.37558e-19 | 1.000000 |
| rad46                         | 5.47480e-19 | 1.000000 | 5.47480e-19 | 1.000000 |
| rad31                         | 1.30149e-19 | 1.000000 | 1.30149e-19 | 1.000000 |
| rad43                         | 4.78438e-20 | 1.000000 | 4.78438e-20 | 1.000000 |
| rad58                         | 4.41723e-21 | 1.000000 | 4.41723e-21 | 1.000000 |

|           |             |          |             |          |
|-----------|-------------|----------|-------------|----------|
| rad70     | 3.08100e-21 | 1.000000 | 3.08100e-21 | 1.000000 |
| rad50     | 2.36351e-21 | 1.000000 | 2.36351e-21 | 1.000000 |
| rad39     | 8.70520e-22 | 1.000000 | 8.70520e-22 | 1.000000 |
| rad62     | 1.27398e-22 | 1.000000 | 1.27398e-22 | 1.000000 |
| PAH1+H    | 3.14557e-23 | 1.000000 | 3.14557e-23 | 1.000000 |
| rad54     | 3.10797e-23 | 1.000000 | 3.10797e-23 | 1.000000 |
| rad34     | 3.03339e-23 | 1.000000 | 3.03339e-23 | 1.000000 |
| rad52     | 1.26983e-23 | 1.000000 | 1.26983e-23 | 1.000000 |
| rad51     | 2.81951e-24 | 1.000000 | 2.81951e-24 | 1.000000 |
| rad41     | 7.79536e-25 | 1.000000 | 7.79536e-25 | 1.000000 |
| rad55     | 1.92718e-25 | 1.000000 | 1.92718e-25 | 1.000000 |
| rad47     | 1.13813e-26 | 1.000000 | 1.13813e-26 | 1.000000 |
| rad42     | 8.72338e-27 | 1.000000 | 8.72338e-27 | 1.000000 |
| rad65     | 1.04567e-27 | 1.000000 | 1.04567e-27 | 1.000000 |
| rad8      | 1.02089e-28 | 1.000000 | 1.02089e-28 | 1.000000 |
| rad53     | 1.94124e-31 | 1.000000 | 1.94124e-31 | 1.000000 |
| rad61     | 2.32624e-32 | 1.000000 | 2.32624e-32 | 1.000000 |
| rad19syn  | 3.48356e-33 | 1.000000 | 3.48356e-33 | 1.000000 |
| rad68syn  | 1.38458e-34 | 1.000000 | 1.38458e-34 | 1.000000 |
| rad68anti | 1.12046e-34 | 1.000000 | 1.12046e-34 | 1.000000 |
| rad64     | 2.29790e-35 | 1.000000 | 2.29790e-35 | 1.000000 |
| rad56     | 9.37242e-37 | 1.000000 | 9.37242e-37 | 1.000000 |
| rad40syn  | 3.10339e-39 | 1.000000 | 3.10339e-39 | 1.000000 |
| rad40anti | 2.43620e-39 | 1.000000 | 2.43620e-39 | 1.000000 |
| rad73     | 3.31067e-41 | 1.000000 | 3.31067e-41 | 1.000000 |
| PAH8+H    | 1.24677e-41 | 1.000000 | 1.24677e-41 | 1.000000 |
| rad71     | 5.44146e-46 | 1.000000 | 5.44146e-46 | 1.000000 |

100000.000 Pa, 110.000000 K

| Rate constant             | True (fraction)        | Effective (fraction)   |
|---------------------------|------------------------|------------------------|
| Total                     | 1.95524e-15 (1.00 )    | 1.95524e-15 (1.00 )    |
| Formation of rad19        | 1.95524e-15 (1.000 )   | 1.95524e-15 (1.000 )   |
| H-abstraction to cyc2enyl | 4.50936e-23 (2.31e-08) | 4.50936e-23 (2.31e-08) |
| H-abstraction to cyclenyl | 7.87782e-30 (4.03e-15) | 7.87782e-30 (4.03e-15) |

| species                       | PYtrue      | Cumul    | PYeffective | Cumul    |
|-------------------------------|-------------|----------|-------------|----------|
| rad9                          | 0.995317    | 0.995317 | 0.995317    | 0.995317 |
| rad15                         | 0.00361569  | 0.998933 | 0.00361569  | 0.998933 |
| Indene+H                      | 0.00100707  | 0.999940 | 0.00100707  | 0.999940 |
| rad19anti                     | 6.00848e-05 | 1.000000 | 6.00848e-05 | 1.000000 |
| PhCHCCH2+H                    | 1.68107e-07 | 1.000000 | 1.68107e-07 | 1.000000 |
| rad12                         | 1.25906e-07 | 1.000000 | 1.25906e-07 | 1.000000 |
| Benzene+cycloprop-2-enylidene | 2.30629e-08 | 1.000000 | 2.30629e-08 | 1.000000 |
| rad11                         | 7.46343e-09 | 1.000000 | 7.46343e-09 | 1.000000 |
| rad2                          | 6.56521e-09 | 1.000000 | 6.56521e-09 | 1.000000 |
| rad18                         | 2.99365e-09 | 1.000000 | 2.99365e-09 | 1.000000 |
| rad6                          | 1.05632e-09 | 1.000000 | 1.05632e-09 | 1.000000 |
| rad26                         | 9.92521e-10 | 1.000000 | 9.92521e-10 | 1.000000 |
| rad22                         | 9.27059e-10 | 1.000000 | 9.27059e-10 | 1.000000 |
| rad1                          | 4.78034e-10 | 1.000000 | 4.78034e-10 | 1.000000 |
| rad20                         | 1.63527e-10 | 1.000000 | 1.63527e-10 | 1.000000 |
| rad67                         | 1.62564e-10 | 1.000000 | 1.62564e-10 | 1.000000 |
| C2H2+PhCH2                    | 1.54013e-10 | 1.000000 | 1.54013e-10 | 1.000000 |
| rad45                         | 1.44475e-10 | 1.000000 | 1.44475e-10 | 1.000000 |
| rad21                         | 1.13267e-10 | 1.000000 | 1.13267e-10 | 1.000000 |
| rad7                          | 8.40723e-11 | 1.000000 | 8.40723e-11 | 1.000000 |
| rad35                         | 7.34477e-11 | 1.000000 | 7.34477e-11 | 1.000000 |
| rad10                         | 2.91385e-11 | 1.000000 | 2.91385e-11 | 1.000000 |
| rad23                         | 2.00889e-11 | 1.000000 | 2.00889e-11 | 1.000000 |
| rad36                         | 9.15924e-12 | 1.000000 | 9.15924e-12 | 1.000000 |
| rad3                          | 7.73741e-12 | 1.000000 | 7.73741e-12 | 1.000000 |
| rad4                          | 4.11396e-12 | 1.000000 | 4.11396e-12 | 1.000000 |
| PhCCCH3+H                     | 2.16715e-12 | 1.000000 | 2.16715e-12 | 1.000000 |
| rad5                          | 1.40061e-12 | 1.000000 | 1.40061e-12 | 1.000000 |
| PhcycC3H3_A+H                 | 1.35712e-12 | 1.000000 | 1.35712e-12 | 1.000000 |
| Ph+MeAc                       | 1.34371e-12 | 1.000000 | 1.34371e-12 | 1.000000 |
| rad30                         | 6.87193e-13 | 1.000000 | 6.87193e-13 | 1.000000 |
| Ph+Allene                     | 5.52133e-13 | 1.000000 | 5.52133e-13 | 1.000000 |
| rad25                         | 3.22474e-13 | 1.000000 | 3.22474e-13 | 1.000000 |
| PhCCH+CH3                     | 1.97633e-13 | 1.000000 | 1.97633e-13 | 1.000000 |
| rad27                         | 1.22106e-13 | 1.000000 | 1.22106e-13 | 1.000000 |
| PhCH2CCH+H                    | 8.90576e-14 | 1.000000 | 8.90576e-14 | 1.000000 |
| rad13                         | 3.58706e-14 | 1.000000 | 3.58706e-14 | 1.000000 |
| Phenyl+cycC3H4                | 5.18165e-15 | 1.000000 | 0.000000    | 1.000000 |
| Benzene+cycloprop-1-enylidene | 4.02908e-15 | 1.000000 | 4.02908e-15 | 1.000000 |
| rad60syn                      | 2.23466e-15 | 1.000000 | 2.23466e-15 | 1.000000 |
| rad24                         | 1.96622e-15 | 1.000000 | 1.96622e-15 | 1.000000 |

|               |             |         |             |         |
|---------------|-------------|---------|-------------|---------|
| rad14         | 1.62903e-15 | 1.00000 | 1.62903e-15 | 1.00000 |
| rad60anti     | 1.06977e-15 | 1.00000 | 1.06977e-15 | 1.00000 |
| rad37         | 1.02110e-15 | 1.00000 | 1.02110e-15 | 1.00000 |
| PAH3+H        | 7.22739e-16 | 1.00000 | 7.22739e-16 | 1.00000 |
| rad28         | 5.63250e-16 | 1.00000 | 5.63250e-16 | 1.00000 |
| rad59         | 1.53068e-16 | 1.00000 | 1.53068e-16 | 1.00000 |
| PAH7+H        | 1.42630e-16 | 1.00000 | 1.42630e-16 | 1.00000 |
| PhcycC3H3_B+H | 1.19277e-16 | 1.00000 | 1.19277e-16 | 1.00000 |
| rad33         | 8.45098e-17 | 1.00000 | 8.45098e-17 | 1.00000 |
| rad38         | 1.69840e-17 | 1.00000 | 1.69840e-17 | 1.00000 |
| PAH9+H        | 1.10962e-18 | 1.00000 | 1.10962e-18 | 1.00000 |
| PAH10+CH3     | 9.50014e-19 | 1.00000 | 9.50014e-19 | 1.00000 |
| rad46         | 8.33017e-19 | 1.00000 | 8.33017e-19 | 1.00000 |
| rad31         | 1.54108e-19 | 1.00000 | 1.54108e-19 | 1.00000 |
| rad43         | 7.66013e-20 | 1.00000 | 7.66013e-20 | 1.00000 |
| rad58         | 7.02768e-21 | 1.00000 | 7.02768e-21 | 1.00000 |
| rad70         | 5.13245e-21 | 1.00000 | 5.13245e-21 | 1.00000 |
| rad50         | 3.74585e-21 | 1.00000 | 3.74585e-21 | 1.00000 |
| rad39         | 1.46556e-21 | 1.00000 | 1.46556e-21 | 1.00000 |
| rad62         | 2.46506e-22 | 1.00000 | 2.46506e-22 | 1.00000 |
| rad34         | 5.45023e-23 | 1.00000 | 5.45023e-23 | 1.00000 |
| rad54         | 5.28669e-23 | 1.00000 | 5.28669e-23 | 1.00000 |
| PAH1+H        | 5.26260e-23 | 1.00000 | 5.26260e-23 | 1.00000 |
| rad52         | 2.07680e-23 | 1.00000 | 2.07680e-23 | 1.00000 |
| rad51         | 4.78832e-24 | 1.00000 | 4.78832e-24 | 1.00000 |
| rad41         | 1.56020e-24 | 1.00000 | 1.56020e-24 | 1.00000 |
| rad55         | 3.45349e-25 | 1.00000 | 3.45349e-25 | 1.00000 |
| rad42         | 2.07271e-26 | 1.00000 | 2.07271e-26 | 1.00000 |
| rad47         | 1.65167e-26 | 1.00000 | 1.65167e-26 | 1.00000 |
| rad65         | 2.08411e-27 | 1.00000 | 2.08411e-27 | 1.00000 |
| rad8          | 2.34420e-29 | 1.00000 | 2.34420e-29 | 1.00000 |
| rad53         | 6.73209e-31 | 1.00000 | 6.73209e-31 | 1.00000 |
| rad61         | 1.66793e-31 | 1.00000 | 1.66793e-31 | 1.00000 |
| rad19syn      | 6.83137e-33 | 1.00000 | 6.83137e-33 | 1.00000 |
| rad68syn      | 1.40196e-33 | 1.00000 | 1.40196e-33 | 1.00000 |
| rad68anti     | 1.13031e-33 | 1.00000 | 1.13031e-33 | 1.00000 |
| rad64         | 1.04421e-34 | 1.00000 | 1.04421e-34 | 1.00000 |
| rad56         | 8.70935e-36 | 1.00000 | 8.70935e-36 | 1.00000 |
| rad40syn      | 5.54271e-38 | 1.00000 | 5.54271e-38 | 1.00000 |
| rad40anti     | 4.34722e-38 | 1.00000 | 4.34722e-38 | 1.00000 |
| rad73         | 5.23517e-40 | 1.00000 | 5.23517e-40 | 1.00000 |
| PAH8+H        | 3.03460e-40 | 1.00000 | 3.03460e-40 | 1.00000 |
| rad71         | 1.50277e-44 | 1.00000 | 1.50277e-44 | 1.00000 |

100000.000 Pa, 120.000000 K

| Rate constant             | True (fraction)        | Effective (fraction)   |
|---------------------------|------------------------|------------------------|
| Total                     | 2.79817e-15 (1.00 )    | 2.79817e-15 (1.00 )    |
| Formation of rad19        | 2.79817e-15 (1.000 )   | 2.79817e-15 (1.000 )   |
| H-abstraction to cyc2enyl | 2.96039e-22 (1.06e-07) | 2.96039e-22 (1.06e-07) |
| H-abstraction to cyclenyl | 1.95323e-28 (6.98e-14) | 1.95323e-28 (6.98e-14) |

| species                       | PYtrue      | Cumul    | PYeffective | Cumul    |
|-------------------------------|-------------|----------|-------------|----------|
| rad9                          | 0.995161    | 0.995161 | 0.995161    | 0.995161 |
| rad15                         | 0.00363990  | 0.998801 | 0.00363990  | 0.998801 |
| Indene+H                      | 0.00116343  | 0.999964 | 0.00116343  | 0.999964 |
| rad19anti                     | 3.56022e-05 | 1.000000 | 3.56022e-05 | 1.000000 |
| PhCHCCH2+H                    | 1.94899e-07 | 1.000000 | 1.94899e-07 | 1.000000 |
| rad12                         | 1.17272e-07 | 1.000000 | 1.17272e-07 | 1.000000 |
| Benzene+cycloprop-2-enylidene | 1.05797e-07 | 1.000000 | 1.05797e-07 | 1.000000 |
| rad11                         | 8.54414e-09 | 1.000000 | 8.54414e-09 | 1.000000 |
| rad2                          | 7.64400e-09 | 1.000000 | 7.64400e-09 | 1.000000 |
| rad18                         | 3.16875e-09 | 1.000000 | 3.16875e-09 | 1.000000 |
| rad6                          | 1.35139e-09 | 1.000000 | 1.35139e-09 | 1.000000 |
| rad22                         | 1.15773e-09 | 1.000000 | 1.15773e-09 | 1.000000 |
| rad26                         | 1.15562e-09 | 1.000000 | 1.15562e-09 | 1.000000 |
| rad1                          | 5.54926e-10 | 1.000000 | 5.54926e-10 | 1.000000 |
| C2H2+PhCH2                    | 2.02820e-10 | 1.000000 | 2.02820e-10 | 1.000000 |
| rad67                         | 2.01894e-10 | 1.000000 | 2.01894e-10 | 1.000000 |
| rad45                         | 1.82233e-10 | 1.000000 | 1.82233e-10 | 1.000000 |
| rad20                         | 1.76942e-10 | 1.000000 | 1.76942e-10 | 1.000000 |
| rad21                         | 1.22754e-10 | 1.000000 | 1.22754e-10 | 1.000000 |
| rad35                         | 9.09780e-11 | 1.000000 | 9.09780e-11 | 1.000000 |
| rad7                          | 8.71287e-11 | 1.000000 | 8.71287e-11 | 1.000000 |
| rad10                         | 3.80260e-11 | 1.000000 | 3.80260e-11 | 1.000000 |
| rad23                         | 2.82875e-11 | 1.000000 | 2.82875e-11 | 1.000000 |
| rad36                         | 1.15305e-11 | 1.000000 | 1.15305e-11 | 1.000000 |
| rad3                          | 1.00944e-11 | 1.000000 | 1.00944e-11 | 1.000000 |

|                               |             |         |             |         |
|-------------------------------|-------------|---------|-------------|---------|
| rad4                          | 5.35911e-12 | 1.00000 | 5.35911e-12 | 1.00000 |
| PhCCCH3+H                     | 2.90567e-12 | 1.00000 | 2.90567e-12 | 1.00000 |
| Ph+MeAc                       | 1.82325e-12 | 1.00000 | 1.82325e-12 | 1.00000 |
| PhcycC3H3_A+H                 | 1.75133e-12 | 1.00000 | 1.75133e-12 | 1.00000 |
| rad5                          | 1.67260e-12 | 1.00000 | 1.67260e-12 | 1.00000 |
| rad30                         | 8.98389e-13 | 1.00000 | 8.98389e-13 | 1.00000 |
| Ph+Allene                     | 7.41319e-13 | 1.00000 | 7.41319e-13 | 1.00000 |
| rad25                         | 3.86794e-13 | 1.00000 | 3.86794e-13 | 1.00000 |
| PhCCH+CH3                     | 2.94635e-13 | 1.00000 | 2.94635e-13 | 1.00000 |
| rad27                         | 1.45561e-13 | 1.00000 | 1.45561e-13 | 1.00000 |
| PhCH2CCH+H                    | 1.21483e-13 | 1.00000 | 1.21483e-13 | 1.00000 |
| Benzene+cycloprop-1-enylidene | 6.98038e-14 | 1.00000 | 6.98038e-14 | 1.00000 |
| rad13                         | 4.44656e-14 | 1.00000 | 4.44656e-14 | 1.00000 |
| Phenyl+cycC3H4                | 7.85837e-15 | 1.00000 | 0.00000     | 1.00000 |
| rad60syn                      | 3.00978e-15 | 1.00000 | 3.00978e-15 | 1.00000 |
| rad14                         | 2.34103e-15 | 1.00000 | 2.34103e-15 | 1.00000 |
| rad24                         | 1.88382e-15 | 1.00000 | 1.88382e-15 | 1.00000 |
| rad60anti                     | 1.44446e-15 | 1.00000 | 1.44446e-15 | 1.00000 |
| rad37                         | 1.39247e-15 | 1.00000 | 1.39247e-15 | 1.00000 |
| PAH3+H                        | 1.00647e-15 | 1.00000 | 1.00647e-15 | 1.00000 |
| rad28                         | 7.97717e-16 | 1.00000 | 7.97717e-16 | 1.00000 |
| PhcycC3H3_B+H                 | 3.17736e-16 | 1.00000 | 3.17736e-16 | 1.00000 |
| rad59                         | 2.12189e-16 | 1.00000 | 2.12189e-16 | 1.00000 |
| PAH7+H                        | 2.07752e-16 | 1.00000 | 2.07752e-16 | 1.00000 |
| rad33                         | 1.01663e-16 | 1.00000 | 1.01663e-16 | 1.00000 |
| rad38                         | 2.48414e-17 | 1.00000 | 2.48414e-17 | 1.00000 |
| PAH9+H                        | 1.83245e-18 | 1.00000 | 1.83245e-18 | 1.00000 |
| PAH10+CH3                     | 1.40139e-18 | 1.00000 | 1.40139e-18 | 1.00000 |
| rad46                         | 1.24009e-18 | 1.00000 | 1.24009e-18 | 1.00000 |
| rad31                         | 1.81707e-19 | 1.00000 | 1.81707e-19 | 1.00000 |
| rad43                         | 1.20546e-19 | 1.00000 | 1.20546e-19 | 1.00000 |
| rad58                         | 1.09886e-20 | 1.00000 | 1.09886e-20 | 1.00000 |
| rad70                         | 8.41572e-21 | 1.00000 | 8.41572e-21 | 1.00000 |
| rad50                         | 5.83059e-21 | 1.00000 | 5.83059e-21 | 1.00000 |
| rad39                         | 2.42572e-21 | 1.00000 | 2.42572e-21 | 1.00000 |
| rad62                         | 4.67639e-22 | 1.00000 | 4.67639e-22 | 1.00000 |
| rad34                         | 9.67382e-23 | 1.00000 | 9.67382e-23 | 1.00000 |
| rad54                         | 8.85059e-23 | 1.00000 | 8.85059e-23 | 1.00000 |
| PAH1+H                        | 8.77747e-23 | 1.00000 | 8.77747e-23 | 1.00000 |
| rad52                         | 3.34512e-23 | 1.00000 | 3.34512e-23 | 1.00000 |
| rad51                         | 8.03456e-24 | 1.00000 | 8.03456e-24 | 1.00000 |
| rad41                         | 3.09184e-24 | 1.00000 | 3.09184e-24 | 1.00000 |
| rad55                         | 6.11269e-25 | 1.00000 | 6.11269e-25 | 1.00000 |
| rad42                         | 4.87137e-26 | 1.00000 | 4.87137e-26 | 1.00000 |
| rad47                         | 2.34664e-26 | 1.00000 | 2.34664e-26 | 1.00000 |
| rad65                         | 4.08221e-27 | 1.00000 | 4.08221e-27 | 1.00000 |
| rad8                          | 6.56971e-30 | 1.00000 | 6.56971e-30 | 1.00000 |
| rad53                         | 2.24688e-30 | 1.00000 | 2.24688e-30 | 1.00000 |
| rad61                         | 1.13436e-30 | 1.00000 | 1.13436e-30 | 1.00000 |
| rad19syn                      | 1.41177e-32 | 1.00000 | 1.41177e-32 | 1.00000 |
| rad68syn                      | 1.39076e-32 | 1.00000 | 1.39076e-32 | 1.00000 |
| rad68anti                     | 1.11630e-32 | 1.00000 | 1.11630e-32 | 1.00000 |
| rad64                         | 4.61142e-34 | 1.00000 | 4.61142e-34 | 1.00000 |
| rad56                         | 7.94296e-35 | 1.00000 | 7.94296e-35 | 1.00000 |
| rad40syn                      | 1.07541e-36 | 1.00000 | 1.07541e-36 | 1.00000 |
| rad40anti                     | 8.41363e-37 | 1.00000 | 8.41363e-37 | 1.00000 |
| PAH8+H                        | 9.04731e-39 | 1.00000 | 9.04731e-39 | 1.00000 |
| rad73                         | 8.73675e-39 | 1.00000 | 8.73675e-39 | 1.00000 |
| rad71                         | 5.18331e-43 | 1.00000 | 5.18331e-43 | 1.00000 |

100000.000 Pa, 130.000000 K

=====

| Rate constant             | True (fraction)        | Effective (fraction)   |
|---------------------------|------------------------|------------------------|
| Total                     | 3.81236e-15 (1.00000)  | 3.81236e-15 (1.00000)  |
| Formation of rad19        | 3.81236e-15 (1.00000)  | 3.81236e-15 (1.00000)  |
| H-abstraction to cyc2enyl | 1.44825e-21 (3.80e-07) | 1.44825e-21 (3.80e-07) |
| H-abstraction to cyclenyl | 2.94348e-27 (7.72e-13) | 2.94348e-27 (7.72e-13) |

| species                       | PYtrue      | Cumul    | PYeffective | Cumul    |
|-------------------------------|-------------|----------|-------------|----------|
| rad9                          | 0.995000    | 0.995000 | 0.995000    | 0.995000 |
| rad15                         | 0.00365075  | 0.998650 | 0.00365075  | 0.998650 |
| Indene+H                      | 0.00132672  | 0.999977 | 0.00132672  | 0.999977 |
| rad19anti                     | 2.21492e-05 | 0.999999 | 2.21492e-05 | 0.999999 |
| Benzene+cycloprop-2-enylidene | 3.79882e-07 | 1.000000 | 3.79882e-07 | 1.000000 |
| PhCHCCH2+H                    | 2.24391e-07 | 1.000000 | 2.24391e-07 | 1.000000 |
| rad12                         | 1.10112e-07 | 1.000000 | 1.10112e-07 | 1.000000 |
| rad11                         | 9.70762e-09 | 1.000000 | 9.70762e-09 | 1.000000 |
| rad2                          | 8.83834e-09 | 1.000000 | 8.83834e-09 | 1.000000 |

|                               |             |          |             |          |
|-------------------------------|-------------|----------|-------------|----------|
| rad18                         | 3.31050e-09 | 1.000000 | 3.31050e-09 | 1.000000 |
| rad6                          | 1.70646e-09 | 1.000000 | 1.70646e-09 | 1.000000 |
| rad22                         | 1.41940e-09 | 1.000000 | 1.41940e-09 | 1.000000 |
| rad26                         | 1.33606e-09 | 1.000000 | 1.33606e-09 | 1.000000 |
| rad1                          | 6.40450e-10 | 1.000000 | 6.40450e-10 | 1.000000 |
| C2H2+PhCH2                    | 2.62180e-10 | 1.000000 | 2.62180e-10 | 1.000000 |
| rad67                         | 2.47639e-10 | 1.000000 | 2.47639e-10 | 1.000000 |
| rad45                         | 2.26150e-10 | 1.000000 | 2.26150e-10 | 1.000000 |
| rad20                         | 1.88759e-10 | 1.000000 | 1.88759e-10 | 1.000000 |
| rad21                         | 1.31140e-10 | 1.000000 | 1.31140e-10 | 1.000000 |
| rad35                         | 1.11291e-10 | 1.000000 | 1.11291e-10 | 1.000000 |
| rad7                          | 9.05000e-11 | 1.000000 | 9.05000e-11 | 1.000000 |
| rad10                         | 4.90023e-11 | 1.000000 | 4.90023e-11 | 1.000000 |
| rad23                         | 3.89444e-11 | 1.000000 | 3.89444e-11 | 1.000000 |
| rad36                         | 1.42897e-11 | 1.000000 | 1.42897e-11 | 1.000000 |
| rad3                          | 1.29993e-11 | 1.000000 | 1.29993e-11 | 1.000000 |
| rad4                          | 6.89367e-12 | 1.000000 | 6.89367e-12 | 1.000000 |
| PhCCCH3+H                     | 3.85387e-12 | 1.000000 | 3.85387e-12 | 1.000000 |
| Ph+MeAc                       | 2.44934e-12 | 1.000000 | 2.44934e-12 | 1.000000 |
| PhcycC3H3_A+H                 | 2.26688e-12 | 1.000000 | 2.26688e-12 | 1.000000 |
| rad5                          | 1.99321e-12 | 1.000000 | 1.99321e-12 | 1.000000 |
| rad30                         | 1.15281e-12 | 1.000000 | 1.15281e-12 | 1.000000 |
| Ph+Allene                     | 9.84592e-13 | 1.000000 | 9.84592e-13 | 1.000000 |
| Benzene+cycloprop-1-enylidene | 7.72089e-13 | 1.000000 | 7.72089e-13 | 1.000000 |
| rad25                         | 4.57459e-13 | 1.000000 | 4.57459e-13 | 1.000000 |
| PhCCH+CH3                     | 4.33433e-13 | 1.000000 | 4.33433e-13 | 1.000000 |
| rad27                         | 1.71391e-13 | 1.000000 | 1.71391e-13 | 1.000000 |
| PhCH2CCH+H                    | 1.64094e-13 | 1.000000 | 1.64094e-13 | 1.000000 |
| rad13                         | 5.45346e-14 | 1.000000 | 5.45346e-14 | 1.000000 |
| Phenyl+cycC3H4                | 1.17957e-14 | 1.000000 | 0.00000     | 1.000000 |
| rad60syn                      | 3.98241e-15 | 1.000000 | 3.98241e-15 | 1.000000 |
| rad14                         | 3.30101e-15 | 1.000000 | 3.30101e-15 | 1.000000 |
| rad60anti                     | 1.91626e-15 | 1.000000 | 1.91626e-15 | 1.000000 |
| rad37                         | 1.87969e-15 | 1.000000 | 1.87969e-15 | 1.000000 |
| rad24                         | 1.80018e-15 | 1.000000 | 1.80018e-15 | 1.000000 |
| PAH3+H                        | 1.37893e-15 | 1.000000 | 1.37893e-15 | 1.000000 |
| rad28                         | 1.11736e-15 | 1.000000 | 1.11736e-15 | 1.000000 |
| PhcycC3H3_B+H                 | 7.69765e-16 | 1.000000 | 7.69765e-16 | 1.000000 |
| PAH7+H                        | 2.97900e-16 | 1.000000 | 2.97900e-16 | 1.000000 |
| rad59                         | 2.89308e-16 | 1.000000 | 2.89308e-16 | 1.000000 |
| rad33                         | 1.21433e-16 | 1.000000 | 1.21433e-16 | 1.000000 |
| rad38                         | 3.57750e-17 | 1.000000 | 3.57750e-17 | 1.000000 |
| PAH9+H                        | 2.95631e-18 | 1.000000 | 2.95631e-18 | 1.000000 |
| PAH10+CH3                     | 2.05821e-18 | 1.000000 | 2.05821e-18 | 1.000000 |
| rad46                         | 1.81727e-18 | 1.000000 | 1.81727e-18 | 1.000000 |
| rad31                         | 2.13808e-19 | 1.000000 | 2.13808e-19 | 1.000000 |
| rad43                         | 1.87778e-19 | 1.000000 | 1.87778e-19 | 1.000000 |
| rad58                         | 1.69995e-20 | 1.000000 | 1.69995e-20 | 1.000000 |
| rad70                         | 1.36793e-20 | 1.000000 | 1.36793e-20 | 1.000000 |
| rad50                         | 8.97165e-21 | 1.000000 | 8.97165e-21 | 1.000000 |
| rad39                         | 3.97849e-21 | 1.000000 | 3.97849e-21 | 1.000000 |
| rad62                         | 8.77919e-22 | 1.000000 | 8.77919e-22 | 1.000000 |
| rad34                         | 1.70802e-22 | 1.000000 | 1.70802e-22 | 1.000000 |
| rad54                         | 1.47001e-22 | 1.000000 | 1.47001e-22 | 1.000000 |
| PAH1+H                        | 1.46832e-22 | 1.000000 | 1.46832e-22 | 1.000000 |
| rad52                         | 5.34256e-23 | 1.000000 | 5.34256e-23 | 1.000000 |
| rad51                         | 1.34145e-23 | 1.000000 | 1.34145e-23 | 1.000000 |
| rad41                         | 6.10598e-24 | 1.000000 | 6.10598e-24 | 1.000000 |
| rad55                         | 1.07752e-24 | 1.000000 | 1.07752e-24 | 1.000000 |
| rad42                         | 1.14161e-25 | 1.000000 | 1.14161e-25 | 1.000000 |
| rad47                         | 3.28112e-26 | 1.000000 | 3.28112e-26 | 1.000000 |
| rad65                         | 7.93428e-27 | 1.000000 | 7.93428e-27 | 1.000000 |
| rad53                         | 7.23749e-30 | 1.000000 | 7.23749e-30 | 1.000000 |
| rad61                         | 6.92529e-30 | 1.000000 | 6.92529e-30 | 1.000000 |
| rad8                          | 2.17088e-30 | 1.000000 | 2.17088e-30 | 1.000000 |
| rad68syn                      | 1.22389e-31 | 1.000000 | 1.22389e-31 | 1.000000 |
| rad68anti                     | 9.77519e-32 | 1.000000 | 9.77519e-32 | 1.000000 |
| rad19syn                      | 3.07321e-32 | 1.000000 | 3.07321e-32 | 1.000000 |
| rad64                         | 1.96504e-33 | 1.000000 | 1.96504e-33 | 1.000000 |
| rad56                         | 6.56178e-34 | 1.000000 | 6.56178e-34 | 1.000000 |
| rad40syn                      | 1.90530e-35 | 1.000000 | 1.90530e-35 | 1.000000 |
| rad40anti                     | 1.48675e-35 | 1.000000 | 1.48675e-35 | 1.000000 |
| PAH8+H                        | 2.55774e-37 | 1.000000 | 2.55774e-37 | 1.000000 |
| rad73                         | 1.33019e-37 | 1.000000 | 1.33019e-37 | 1.000000 |
| rad71                         | 1.71416e-41 | 1.000000 | 1.71416e-41 | 1.000000 |

100000.000 Pa, 140.000000 K

=====

Rate constant | True (fraction) Effective (fraction)

-----

|                           |                        |                        |
|---------------------------|------------------------|------------------------|
| Total                     | 4.99515e-15 (1.00 )    | 4.99515e-15 (1.00 )    |
| Formation of rad19        | 4.99514e-15 (1.000 )   | 4.99514e-15 (1.000 )   |
| H-abstraction to cyc2enyl | 5.62488e-21 (1.13e-06) | 5.62488e-21 (1.13e-06) |
| H-abstraction to cyclenyl | 3.00047e-26 (6.01e-12) | 3.00047e-26 (6.01e-12) |

| species                       | PYtrue      | Cumul    | PYeffective | Cumul    |
|-------------------------------|-------------|----------|-------------|----------|
| rad9                          | 0.994835    | 0.994835 | 0.994835    | 0.994835 |
| rad15                         | 0.00365193  | 0.998487 | 0.00365193  | 0.998487 |
| Indene+H                      | 0.00149744  | 0.999984 | 0.00149744  | 0.999984 |
| rad19anti                     | 1.44295e-05 | 0.999999 | 1.44295e-05 | 0.999999 |
| Benzene+cycloprop-2-enylidene | 1.12607e-06 | 1.000000 | 1.12607e-06 | 1.000000 |
| PhCHCCH2+H                    | 2.57058e-07 | 1.000000 | 2.57058e-07 | 1.000000 |
| rad12                         | 1.04080e-07 | 1.000000 | 1.04080e-07 | 1.000000 |
| rad11                         | 1.09668e-08 | 1.000000 | 1.09668e-08 | 1.000000 |
| rad2                          | 1.01688e-08 | 1.000000 | 1.01688e-08 | 1.000000 |
| rad18                         | 3.42255e-09 | 1.000000 | 3.42255e-09 | 1.000000 |
| rad6                          | 2.13383e-09 | 1.000000 | 2.13383e-09 | 1.000000 |
| rad22                         | 1.71476e-09 | 1.000000 | 1.71476e-09 | 1.000000 |
| rad26                         | 1.53695e-09 | 1.000000 | 1.53695e-09 | 1.000000 |
| rad1                          | 7.36256e-10 | 1.000000 | 7.36256e-10 | 1.000000 |
| C2H2+PhCH2                    | 3.34081e-10 | 1.000000 | 3.34081e-10 | 1.000000 |
| rad67                         | 3.00964e-10 | 1.000000 | 3.00964e-10 | 1.000000 |
| rad45                         | 2.77055e-10 | 1.000000 | 2.77055e-10 | 1.000000 |
| rad20                         | 1.99062e-10 | 1.000000 | 1.99062e-10 | 1.000000 |
| rad21                         | 1.38476e-10 | 1.000000 | 1.38476e-10 | 1.000000 |
| rad35                         | 1.34880e-10 | 1.000000 | 1.34880e-10 | 1.000000 |
| rad7                          | 9.42174e-11 | 1.000000 | 9.42174e-11 | 1.000000 |
| rad10                         | 6.25772e-11 | 1.000000 | 6.25772e-11 | 1.000000 |
| rad23                         | 5.26738e-11 | 1.000000 | 5.26738e-11 | 1.000000 |
| rad36                         | 1.74912e-11 | 1.000000 | 1.74912e-11 | 1.000000 |
| rad3                          | 1.65822e-11 | 1.000000 | 1.65822e-11 | 1.000000 |
| rad4                          | 8.78686e-12 | 1.000000 | 8.78686e-12 | 1.000000 |
| Benzene+cycloprop-1-enylidene | 6.00677e-12 | 1.000000 | 6.00677e-12 | 1.000000 |
| PhCCCH3+H                     | 5.07571e-12 | 1.000000 | 5.07571e-12 | 1.000000 |
| Ph+MeAc                       | 3.27047e-12 | 1.000000 | 3.27047e-12 | 1.000000 |
| PhcycC3H3_A+H                 | 2.94604e-12 | 1.000000 | 2.94604e-12 | 1.000000 |
| rad5                          | 2.37398e-12 | 1.000000 | 2.37398e-12 | 1.000000 |
| rad30                         | 1.45839e-12 | 1.000000 | 1.45839e-12 | 1.000000 |
| Ph+Allene                     | 1.29849e-12 | 1.000000 | 1.29849e-12 | 1.000000 |
| PhCCH+CH3                     | 6.32196e-13 | 1.000000 | 6.32196e-13 | 1.000000 |
| rad25                         | 5.35096e-13 | 1.000000 | 5.35096e-13 | 1.000000 |
| PhCH2CCH+H                    | 2.20341e-13 | 1.000000 | 2.20341e-13 | 1.000000 |
| rad27                         | 1.99944e-13 | 1.000000 | 1.99944e-13 | 1.000000 |
| rad13                         | 6.63802e-14 | 1.000000 | 6.63802e-14 | 1.000000 |
| Phenyl+cycC3H4                | 1.75865e-14 | 1.000000 | 0.000000    | 1.000000 |
| rad60syn                      | 5.20048e-15 | 1.000000 | 5.20048e-15 | 1.000000 |
| rad14                         | 4.58887e-15 | 1.000000 | 4.58887e-15 | 1.000000 |
| rad37                         | 2.52180e-15 | 1.000000 | 2.52180e-15 | 1.000000 |
| rad60anti                     | 2.50919e-15 | 1.000000 | 2.50919e-15 | 1.000000 |
| PAH3+H                        | 1.86759e-15 | 1.000000 | 1.86759e-15 | 1.000000 |
| PhcycC3H3_B+H                 | 1.72713e-15 | 1.000000 | 1.72713e-15 | 1.000000 |
| rad24                         | 1.71796e-15 | 1.000000 | 1.71796e-15 | 1.000000 |
| rad28                         | 1.55442e-15 | 1.000000 | 1.55442e-15 | 1.000000 |
| PAH7+H                        | 4.22624e-16 | 1.000000 | 4.22624e-16 | 1.000000 |
| rad59                         | 3.89825e-16 | 1.000000 | 3.89825e-16 | 1.000000 |
| rad33                         | 1.44361e-16 | 1.000000 | 1.44361e-16 | 1.000000 |
| rad38                         | 5.09636e-17 | 1.000000 | 5.09636e-17 | 1.000000 |
| PAH9+H                        | 4.69048e-18 | 1.000000 | 4.69048e-18 | 1.000000 |
| PAH10+CH3                     | 3.02367e-18 | 1.000000 | 3.02367e-18 | 1.000000 |
| rad46                         | 2.63431e-18 | 1.000000 | 2.63431e-18 | 1.000000 |
| rad43                         | 2.91153e-19 | 1.000000 | 2.91153e-19 | 1.000000 |
| rad31                         | 2.51515e-19 | 1.000000 | 2.51515e-19 | 1.000000 |
| rad58                         | 2.61525e-20 | 1.000000 | 2.61525e-20 | 1.000000 |
| rad70                         | 2.21617e-20 | 1.000000 | 2.21617e-20 | 1.000000 |
| rad50                         | 1.37181e-20 | 1.000000 | 1.37181e-20 | 1.000000 |
| rad39                         | 6.50820e-21 | 1.000000 | 6.50820e-21 | 1.000000 |
| rad62                         | 1.64265e-21 | 1.000000 | 1.64265e-21 | 1.000000 |
| rad34                         | 3.01511e-22 | 1.000000 | 3.01511e-22 | 1.000000 |
| PAH1+H                        | 2.47492e-22 | 1.000000 | 2.47492e-22 | 1.000000 |
| rad54                         | 2.43797e-22 | 1.000000 | 2.43797e-22 | 1.000000 |
| rad52                         | 8.50686e-23 | 1.000000 | 8.50686e-23 | 1.000000 |
| rad51                         | 2.24103e-23 | 1.000000 | 2.24103e-23 | 1.000000 |
| rad41                         | 1.20706e-23 | 1.000000 | 1.20706e-23 | 1.000000 |
| rad55                         | 1.90396e-24 | 1.000000 | 1.90396e-24 | 1.000000 |
| rad42                         | 2.68131e-25 | 1.000000 | 2.68131e-25 | 1.000000 |
| rad47                         | 4.53280e-26 | 1.000000 | 4.53280e-26 | 1.000000 |
| rad65                         | 1.54171e-26 | 1.000000 | 1.54171e-26 | 1.000000 |
| rad61                         | 3.74056e-29 | 1.000000 | 3.74056e-29 | 1.000000 |
| rad53                         | 2.25983e-29 | 1.000000 | 2.25983e-29 | 1.000000 |

|           |             |         |             |         |
|-----------|-------------|---------|-------------|---------|
| rad68syn  | 9.20550e-31 | 1.00000 | 9.20550e-31 | 1.00000 |
| rad8      | 8.24083e-31 | 1.00000 | 8.24083e-31 | 1.00000 |
| rad68anti | 7.31241e-31 | 1.00000 | 7.31241e-31 | 1.00000 |
| rad19syn  | 7.04817e-32 | 1.00000 | 7.04817e-32 | 1.00000 |
| rad64     | 8.07670e-33 | 1.00000 | 8.07670e-33 | 1.00000 |
| rad56     | 4.76192e-33 | 1.00000 | 4.76192e-33 | 1.00000 |
| rad40syn  | 2.81077e-34 | 1.00000 | 2.81077e-34 | 1.00000 |
| rad40anti | 2.18830e-34 | 1.00000 | 2.18830e-34 | 1.00000 |
| PAH8+H    | 5.95475e-36 | 1.00000 | 5.95475e-36 | 1.00000 |
| rad73     | 1.71684e-36 | 1.00000 | 1.71684e-36 | 1.00000 |
| rad71     | 4.67699e-40 | 1.00000 | 4.67699e-40 | 1.00000 |

100000.000 Pa, 150.000000 K

| Rate constant             | True (fraction)        | Effective (fraction)   |
|---------------------------|------------------------|------------------------|
| Total                     | 6.34137e-15 (1.00 )    | 6.34137e-15 (1.00 )    |
| Formation of rad19        | 6.34135e-15 (1.000 )   | 6.34135e-15 (1.000 )   |
| H-abstraction to cyc2enyl | 1.81685e-20 (2.87e-06) | 1.81685e-20 (2.87e-06) |
| H-abstraction to cyclenyl | 2.23765e-25 (3.53e-11) | 2.23765e-25 (3.53e-11) |

| species                       | PYtrue      | Cumul    | PYeffective | Cumul    |
|-------------------------------|-------------|----------|-------------|----------|
| rad9                          | 0.994664    | 0.994664 | 0.994664    | 0.994664 |
| rad15                         | 0.00364611  | 0.998310 | 0.00364611  | 0.998310 |
| Indene+H                      | 0.00167631  | 0.999987 | 0.00167631  | 0.999987 |
| rad19anti                     | 9.82331e-06 | 0.999996 | 9.82331e-06 | 0.999996 |
| Benzene+cycloprop-2-enylidene | 2.86508e-06 | 0.999999 | 2.86508e-06 | 0.999999 |
| PhCHCCH2+H                    | 2.93475e-07 | 1.000000 | 2.93475e-07 | 1.000000 |
| rad12                         | 9.89345e-08 | 1.000000 | 9.89345e-08 | 1.000000 |
| rad11                         | 1.23367e-08 | 1.000000 | 1.23367e-08 | 1.000000 |
| rad2                          | 1.16603e-08 | 1.000000 | 1.16603e-08 | 1.000000 |
| rad18                         | 3.50838e-09 | 1.000000 | 3.50838e-09 | 1.000000 |
| rad6                          | 2.64914e-09 | 1.000000 | 2.64914e-09 | 1.000000 |
| rad22                         | 2.04718e-09 | 1.000000 | 2.04718e-09 | 1.000000 |
| rad26                         | 1.76203e-09 | 1.000000 | 1.76203e-09 | 1.000000 |
| rad1                          | 8.44355e-10 | 1.000000 | 8.44355e-10 | 1.000000 |
| C2H2+PhCH2                    | 4.21031e-10 | 1.000000 | 4.21031e-10 | 1.000000 |
| rad67                         | 3.63343e-10 | 1.000000 | 3.63343e-10 | 1.000000 |
| rad45                         | 3.35978e-10 | 1.000000 | 3.35978e-10 | 1.000000 |
| rad20                         | 2.07964e-10 | 1.000000 | 2.07964e-10 | 1.000000 |
| rad35                         | 1.62368e-10 | 1.000000 | 1.62368e-10 | 1.000000 |
| rad21                         | 1.44841e-10 | 1.000000 | 1.44841e-10 | 1.000000 |
| rad7                          | 9.83162e-11 | 1.000000 | 9.83162e-11 | 1.000000 |
| rad10                         | 7.94176e-11 | 1.000000 | 7.94176e-11 | 1.000000 |
| rad23                         | 7.02590e-11 | 1.000000 | 7.02590e-11 | 1.000000 |
| Benzene+cycloprop-1-enylidene | 3.52865e-11 | 1.000000 | 3.52865e-11 | 1.000000 |
| rad36                         | 2.12031e-11 | 1.000000 | 2.12031e-11 | 1.000000 |
| rad3                          | 2.10106e-11 | 1.000000 | 2.10106e-11 | 1.000000 |
| rad4                          | 1.11283e-11 | 1.000000 | 1.11283e-11 | 1.000000 |
| PhCCCH3+H                     | 6.65877e-12 | 1.000000 | 6.65877e-12 | 1.000000 |
| Ph+MeAc                       | 4.35434e-12 | 1.000000 | 4.35434e-12 | 1.000000 |
| PhcycC3H3_A+H                 | 3.84669e-12 | 1.000000 | 3.84669e-12 | 1.000000 |
| rad5                          | 2.82967e-12 | 1.000000 | 2.82967e-12 | 1.000000 |
| rad30                         | 1.82518e-12 | 1.000000 | 1.82518e-12 | 1.000000 |
| Ph+Allene                     | 1.70560e-12 | 1.000000 | 1.70560e-12 | 1.000000 |
| PhCCH+CH3                     | 9.17862e-13 | 1.000000 | 9.17862e-13 | 1.000000 |
| rad25                         | 6.20486e-13 | 1.000000 | 6.20486e-13 | 1.000000 |
| PhCH2CCH+H                    | 2.95056e-13 | 1.000000 | 2.95056e-13 | 1.000000 |
| rad27                         | 2.31660e-13 | 1.000000 | 2.31660e-13 | 1.000000 |
| rad13                         | 8.03868e-14 | 1.000000 | 8.03868e-14 | 1.000000 |
| Phenyl+cycC3H4                | 2.61093e-14 | 1.000000 | 0.00000     | 1.000000 |
| rad60syn                      | 6.72654e-15 | 1.000000 | 6.72654e-15 | 1.000000 |
| rad14                         | 6.31203e-15 | 1.000000 | 6.31203e-15 | 1.000000 |
| PhcycC3H3_B+H                 | 3.64246e-15 | 1.000000 | 3.64246e-15 | 1.000000 |
| rad37                         | 3.37357e-15 | 1.000000 | 3.37357e-15 | 1.000000 |
| rad60anti                     | 3.25471e-15 | 1.000000 | 3.25471e-15 | 1.000000 |
| PAH3+H                        | 2.50998e-15 | 1.000000 | 2.50998e-15 | 1.000000 |
| rad28                         | 2.15522e-15 | 1.000000 | 2.15522e-15 | 1.000000 |
| rad24                         | 1.63906e-15 | 1.000000 | 1.63906e-15 | 1.000000 |
| PAH7+H                        | 5.95555e-16 | 1.000000 | 5.95555e-16 | 1.000000 |
| rad59                         | 5.21050e-16 | 1.000000 | 5.21050e-16 | 1.000000 |
| rad33                         | 1.71125e-16 | 1.000000 | 1.71125e-16 | 1.000000 |
| rad38                         | 7.20877e-17 | 1.000000 | 7.20877e-17 | 1.000000 |
| PAH9+H                        | 7.35814e-18 | 1.000000 | 7.35814e-18 | 1.000000 |
| PAH10+CH3                     | 4.46001e-18 | 1.000000 | 4.46001e-18 | 1.000000 |
| rad46                         | 3.79236e-18 | 1.000000 | 3.79236e-18 | 1.000000 |
| rad43                         | 4.51335e-19 | 1.000000 | 4.51335e-19 | 1.000000 |
| rad31                         | 2.96257e-19 | 1.000000 | 2.96257e-19 | 1.000000 |
| rad58                         | 4.01649e-20 | 1.000000 | 4.01649e-20 | 1.000000 |



|           |             |          |             |          |
|-----------|-------------|----------|-------------|----------|
| rad70     | 3.59329e-20 | 1.000000 | 3.59329e-20 | 1.000000 |
| rad50     | 2.09320e-20 | 1.000000 | 2.09320e-20 | 1.000000 |
| rad39     | 1.06764e-20 | 1.000000 | 1.06764e-20 | 1.000000 |
| rad62     | 3.07931e-21 | 1.000000 | 3.07931e-21 | 1.000000 |
| rad34     | 5.34004e-22 | 1.000000 | 5.34004e-22 | 1.000000 |
| PAH1+H    | 4.21748e-22 | 1.000000 | 4.21748e-22 | 1.000000 |
| rad54     | 4.05820e-22 | 1.000000 | 4.05820e-22 | 1.000000 |
| rad52     | 1.35633e-22 | 1.000000 | 1.35633e-22 | 1.000000 |
| rad51     | 3.76240e-23 | 1.000000 | 3.76240e-23 | 1.000000 |
| rad41     | 2.39519e-23 | 1.000000 | 2.39519e-23 | 1.000000 |
| rad55     | 3.38908e-24 | 1.000000 | 3.38908e-24 | 1.000000 |
| rad42     | 6.32746e-25 | 1.000000 | 6.32746e-25 | 1.000000 |
| rad47     | 6.20586e-26 | 1.000000 | 6.20586e-26 | 1.000000 |
| rad65     | 3.01168e-26 | 1.000000 | 3.01168e-26 | 1.000000 |
| rad61     | 1.79814e-28 | 1.000000 | 1.79814e-28 | 1.000000 |
| rad53     | 6.86991e-29 | 1.000000 | 6.86991e-29 | 1.000000 |
| rad68syn  | 5.91411e-30 | 1.000000 | 5.91411e-30 | 1.000000 |
| rad68anti | 4.66951e-30 | 1.000000 | 4.66951e-30 | 1.000000 |
| rad8      | 3.52289e-31 | 1.000000 | 3.52289e-31 | 1.000000 |
| rad19syn  | 1.70371e-31 | 1.000000 | 1.70371e-31 | 1.000000 |
| rad64     | 3.21114e-32 | 1.000000 | 3.21114e-32 | 1.000000 |
| rad56     | 3.03352e-32 | 1.000000 | 3.03352e-32 | 1.000000 |
| rad40syn  | 3.36347e-33 | 1.000000 | 3.36347e-33 | 1.000000 |
| rad40anti | 2.61355e-33 | 1.000000 | 2.61355e-33 | 1.000000 |
| PAH8+H    | 1.08448e-34 | 1.000000 | 1.08448e-34 | 1.000000 |
| rad73     | 1.84379e-35 | 1.000000 | 1.84379e-35 | 1.000000 |
| rad71     | 9.96475e-39 | 1.000000 | 9.96475e-39 | 1.000000 |

100000.000 Pa, 160.000000 K

=====

| Rate constant             | True (fraction)        | Effective (fraction)   |
|---------------------------|------------------------|------------------------|
| Total                     | 7.84423e-15 (1.00 )    | 7.84423e-15 (1.00 )    |
| Formation of rad19        | 7.84418e-15 (1.000 )   | 7.84418e-15 (1.000 )   |
| H-abstraction to cyc2enyl | 5.05321e-20 (6.44e-06) | 5.05321e-20 (6.44e-06) |
| H-abstraction to cyclenyl | 1.29479e-24 (1.65e-10) | 1.29479e-24 (1.65e-10) |

| species                       | PYtrue      | Cumul    | PYeffective | Cumul    |
|-------------------------------|-------------|----------|-------------|----------|
| rad9                          | 0.994487    | 0.994487 | 0.994487    | 0.994487 |
| rad15                         | 0.00363526  | 0.998122 | 0.00363526  | 0.998122 |
| Indene+H                      | 0.00186418  | 0.999986 | 0.00186418  | 0.999986 |
| rad19anti                     | 6.97687e-06 | 0.999993 | 6.97687e-06 | 0.999993 |
| Benzene+cycloprop-2-enylidene | 6.44194e-06 | 0.999999 | 6.44194e-06 | 0.999999 |
| PhCHCCH2+H                    | 3.34335e-07 | 1.000000 | 3.34335e-07 | 1.000000 |
| rad12                         | 9.44980e-08 | 1.000000 | 9.44980e-08 | 1.000000 |
| rad11                         | 1.38343e-08 | 1.000000 | 1.38343e-08 | 1.000000 |
| rad2                          | 1.33431e-08 | 1.000000 | 1.33431e-08 | 1.000000 |
| rad18                         | 3.57120e-09 | 1.000000 | 3.57120e-09 | 1.000000 |
| rad6                          | 3.27223e-09 | 1.000000 | 3.27223e-09 | 1.000000 |
| rad22                         | 2.42081e-09 | 1.000000 | 2.42081e-09 | 1.000000 |
| rad26                         | 2.01589e-09 | 1.000000 | 2.01589e-09 | 1.000000 |
| rad1                          | 9.67197e-10 | 1.000000 | 9.67197e-10 | 1.000000 |
| C2H2+PhCH2                    | 5.26195e-10 | 1.000000 | 5.26195e-10 | 1.000000 |
| rad67                         | 4.36631e-10 | 1.000000 | 4.36631e-10 | 1.000000 |
| rad45                         | 4.04198e-10 | 1.000000 | 4.04198e-10 | 1.000000 |
| rad20                         | 2.15599e-10 | 1.000000 | 2.15599e-10 | 1.000000 |
| rad35                         | 1.94535e-10 | 1.000000 | 1.94535e-10 | 1.000000 |
| Benzene+cycloprop-1-enylidene | 1.65062e-10 | 1.000000 | 1.65062e-10 | 1.000000 |
| rad21                         | 1.50324e-10 | 1.000000 | 1.50324e-10 | 1.000000 |
| rad7                          | 1.02835e-10 | 1.000000 | 1.02835e-10 | 1.000000 |
| rad10                         | 1.00397e-10 | 1.000000 | 1.00397e-10 | 1.000000 |
| rad23                         | 9.27043e-11 | 1.000000 | 9.27043e-11 | 1.000000 |
| rad3                          | 2.65015e-11 | 1.000000 | 2.65015e-11 | 1.000000 |
| rad36                         | 2.55103e-11 | 1.000000 | 2.55103e-11 | 1.000000 |
| rad4                          | 1.40340e-11 | 1.000000 | 1.40340e-11 | 1.000000 |
| PhCCCH3+H                     | 8.72380e-12 | 1.000000 | 8.72380e-12 | 1.000000 |
| Ph+MeAc                       | 5.79618e-12 | 1.000000 | 5.79618e-12 | 1.000000 |
| PhcycC3H3_A+H                 | 5.04808e-12 | 1.000000 | 5.04808e-12 | 1.000000 |
| rad5                          | 3.37924e-12 | 1.000000 | 3.37924e-12 | 1.000000 |
| rad30                         | 2.26591e-12 | 1.000000 | 2.26591e-12 | 1.000000 |
| Ph+Allene                     | 2.23694e-12 | 1.000000 | 2.23694e-12 | 1.000000 |
| PhCCH+CH3                     | 1.33073e-12 | 1.000000 | 1.33073e-12 | 1.000000 |
| rad25                         | 7.14554e-13 | 1.000000 | 7.14554e-13 | 1.000000 |
| PhCH2CCH+H                    | 3.95039e-13 | 1.000000 | 3.95039e-13 | 1.000000 |
| rad27                         | 2.67085e-13 | 1.000000 | 2.67085e-13 | 1.000000 |
| rad13                         | 9.70406e-14 | 1.000000 | 9.70406e-14 | 1.000000 |
| Phenyl+cycC3H4                | 3.86632e-14 | 1.000000 | 0.00000     | 1.000000 |
| rad60syn                      | 8.64249e-15 | 1.000000 | 8.64249e-15 | 1.000000 |
| rad14                         | 8.61501e-15 | 1.000000 | 8.61501e-15 | 1.000000 |

|               |             |          |             |          |
|---------------|-------------|----------|-------------|----------|
| PhcycC3H3_B+H | 7.30495e-15 | 1.000000 | 7.30495e-15 | 1.000000 |
| rad37         | 4.51240e-15 | 1.000000 | 4.51240e-15 | 1.000000 |
| rad60anti     | 4.19420e-15 | 1.000000 | 4.19420e-15 | 1.000000 |
| PAH3+H        | 3.35752e-15 | 1.000000 | 3.35752e-15 | 1.000000 |
| rad28         | 2.98692e-15 | 1.000000 | 2.98692e-15 | 1.000000 |
| rad24         | 1.56483e-15 | 1.000000 | 1.56483e-15 | 1.000000 |
| PAH7+H        | 8.36276e-16 | 1.000000 | 8.36276e-16 | 1.000000 |
| rad59         | 6.92931e-16 | 1.000000 | 6.92931e-16 | 1.000000 |
| rad33         | 2.02571e-16 | 1.000000 | 2.02571e-16 | 1.000000 |
| rad38         | 1.01564e-16 | 1.000000 | 1.01564e-16 | 1.000000 |
| PAH9+H        | 1.14627e-17 | 1.000000 | 1.14627e-17 | 1.000000 |
| PAH10+CH3     | 6.62528e-18 | 1.000000 | 6.62528e-18 | 1.000000 |
| rad46         | 5.43947e-18 | 1.000000 | 5.43947e-18 | 1.000000 |
| rad43         | 7.01883e-19 | 1.000000 | 7.01883e-19 | 1.000000 |
| rad31         | 3.49895e-19 | 1.000000 | 3.49895e-19 | 1.000000 |
| rad58         | 6.17534e-20 | 1.000000 | 6.17534e-20 | 1.000000 |
| rad70         | 5.84791e-20 | 1.000000 | 5.84791e-20 | 1.000000 |
| rad50         | 3.19827e-20 | 1.000000 | 3.19827e-20 | 1.000000 |
| rad39         | 1.76418e-20 | 1.000000 | 1.76418e-20 | 1.000000 |
| rad62         | 5.80373e-21 | 1.000000 | 5.80373e-21 | 1.000000 |
| rad34         | 9.50876e-22 | 1.000000 | 9.50876e-22 | 1.000000 |
| PAH1+H        | 7.28187e-22 | 1.000000 | 7.28187e-22 | 1.000000 |
| rad54         | 6.80727e-22 | 1.000000 | 6.80727e-22 | 1.000000 |
| rad52         | 2.17279e-22 | 1.000000 | 2.17279e-22 | 1.000000 |
| rad51         | 6.36847e-23 | 1.000000 | 6.36847e-23 | 1.000000 |
| rad41         | 4.77738e-23 | 1.000000 | 4.77738e-23 | 1.000000 |
| rad55         | 6.09856e-24 | 1.000000 | 6.09856e-24 | 1.000000 |
| rad42         | 1.50098e-24 | 1.000000 | 1.50098e-24 | 1.000000 |
| rad47         | 8.44061e-26 | 1.000000 | 8.44061e-26 | 1.000000 |
| rad65         | 5.93724e-26 | 1.000000 | 5.93724e-26 | 1.000000 |
| rad61         | 7.79464e-28 | 1.000000 | 7.79464e-28 | 1.000000 |
| rad53         | 2.04092e-28 | 1.000000 | 2.04092e-28 | 1.000000 |
| rad68syn      | 3.29112e-29 | 1.000000 | 3.29112e-29 | 1.000000 |
| rad68anti     | 2.58118e-29 | 1.000000 | 2.58118e-29 | 1.000000 |
| rad19syn      | 4.34229e-31 | 1.000000 | 4.34229e-31 | 1.000000 |
| rad56         | 1.71613e-31 | 1.000000 | 1.71613e-31 | 1.000000 |
| rad8          | 1.66991e-31 | 1.000000 | 1.66991e-31 | 1.000000 |
| rad64         | 1.23948e-31 | 1.000000 | 1.23948e-31 | 1.000000 |
| rad40syn      | 3.29084e-32 | 1.000000 | 3.29084e-32 | 1.000000 |
| rad40anti     | 2.55291e-32 | 1.000000 | 2.55291e-32 | 1.000000 |
| PAH8+H        | 1.54778e-33 | 1.000000 | 1.54778e-33 | 1.000000 |
| rad73         | 1.66131e-34 | 1.000000 | 1.66131e-34 | 1.000000 |
| rad71         | 1.65675e-37 | 1.000000 | 1.65675e-37 | 1.000000 |

100000.000 Pa, 170.000000 K

| Rate constant             | True (fraction)        | Effective (fraction)   |
|---------------------------|------------------------|------------------------|
| Total                     | 9.49598e-15 (1.00 )    | 9.49598e-15 (1.00 )    |
| Formation of rad19        | 9.49586e-15 (1.000 )   | 9.49586e-15 (1.000 )   |
| H-abstraction to cyc2enyl | 1.24279e-19 (1.31e-05) | 1.24279e-19 (1.31e-05) |
| H-abstraction to cyclenyl | 6.08025e-24 (6.40e-10) | 6.08025e-24 (6.40e-10) |

| species                       | PYtrue      | Cumul    | PYeffective | Cumul    |
|-------------------------------|-------------|----------|-------------|----------|
| rad9                          | 0.994298    | 0.994298 | 0.994298    | 0.994298 |
| rad15                         | 0.00362081  | 0.997919 | 0.00362081  | 0.997919 |
| Benzene+H                     | 0.00206213  | 0.999981 | 0.00206213  | 0.999981 |
| Benzene+cycloprop-2-enylidene | 1.30875e-05 | 0.999994 | 1.30875e-05 | 0.999994 |
| rad19anti                     | 5.16255e-06 | 0.999999 | 5.16255e-06 | 0.999999 |
| PhCHCCH2+H                    | 3.80472e-07 | 1.000000 | 3.80472e-07 | 1.000000 |
| rad12                         | 9.06393e-08 | 1.000000 | 9.06393e-08 | 1.000000 |
| rad11                         | 1.54791e-08 | 1.000000 | 1.54791e-08 | 1.000000 |
| rad2                          | 1.52537e-08 | 1.000000 | 1.52537e-08 | 1.000000 |
| rad6                          | 4.02826e-09 | 1.000000 | 4.02826e-09 | 1.000000 |
| rad18                         | 3.61390e-09 | 1.000000 | 3.61390e-09 | 1.000000 |
| rad22                         | 2.84058e-09 | 1.000000 | 2.84058e-09 | 1.000000 |
| rad26                         | 2.30401e-09 | 1.000000 | 2.30401e-09 | 1.000000 |
| rad1                          | 1.10778e-09 | 1.000000 | 1.10778e-09 | 1.000000 |
| C2H2+PhCH2                    | 6.53569e-10 | 1.000000 | 6.53569e-10 | 1.000000 |
| Benzene+cycloprop-1-enylidene | 6.40297e-10 | 1.000000 | 6.40297e-10 | 1.000000 |
| rad67                         | 5.23150e-10 | 1.000000 | 5.23150e-10 | 1.000000 |
| rad45                         | 4.83294e-10 | 1.000000 | 4.83294e-10 | 1.000000 |
| rad35                         | 2.32358e-10 | 1.000000 | 2.32358e-10 | 1.000000 |
| rad20                         | 2.22105e-10 | 1.000000 | 2.22105e-10 | 1.000000 |
| rad21                         | 1.55025e-10 | 1.000000 | 1.55025e-10 | 1.000000 |
| rad10                         | 1.26666e-10 | 1.000000 | 1.26666e-10 | 1.000000 |
| rad23                         | 1.21302e-10 | 1.000000 | 1.21302e-10 | 1.000000 |
| rad7                          | 1.07817e-10 | 1.000000 | 1.07817e-10 | 1.000000 |
| rad3                          | 3.33351e-11 | 1.000000 | 3.33351e-11 | 1.000000 |

|                |             |          |             |          |
|----------------|-------------|----------|-------------|----------|
| rad36          | 3.05183e-11 | 1.000000 | 3.05183e-11 | 1.000000 |
| rad4           | 1.76546e-11 | 1.000000 | 1.76546e-11 | 1.000000 |
| PhCCCH3+H      | 1.14383e-11 | 1.000000 | 1.14383e-11 | 1.000000 |
| Ph+MeAc        | 7.73089e-12 | 1.000000 | 7.73089e-12 | 1.000000 |
| PhcycC3H3_A+H  | 6.65844e-12 | 1.000000 | 6.65844e-12 | 1.000000 |
| rad5           | 4.04692e-12 | 1.000000 | 4.04692e-12 | 1.000000 |
| Ph+Allene      | 2.93526e-12 | 1.000000 | 2.93526e-12 | 1.000000 |
| rad30          | 2.79662e-12 | 1.000000 | 2.79662e-12 | 1.000000 |
| PhCCH+CH3      | 1.93154e-12 | 1.000000 | 1.93154e-12 | 1.000000 |
| rad25          | 8.18371e-13 | 1.000000 | 8.18371e-13 | 1.000000 |
| PhCH2CCH+H     | 5.29922e-13 | 1.000000 | 5.29922e-13 | 1.000000 |
| rad27          | 3.06879e-13 | 1.000000 | 3.06879e-13 | 1.000000 |
| rad13          | 1.16955e-13 | 1.000000 | 1.16955e-13 | 1.000000 |
| Phenyl+cycC3H4 | 5.71631e-14 | 1.000000 | 0.00000     | 1.000000 |
| PhcycC3H3_B+H  | 1.40575e-14 | 1.000000 | 1.40575e-14 | 1.000000 |
| rad14          | 1.16920e-14 | 1.000000 | 1.16920e-14 | 1.000000 |
| rad60syn       | 1.10558e-14 | 1.000000 | 1.10558e-14 | 1.000000 |
| rad37          | 6.04844e-15 | 1.000000 | 6.04844e-15 | 1.000000 |
| rad60anti      | 5.38203e-15 | 1.000000 | 5.38203e-15 | 1.000000 |
| PAH3+H         | 4.48093e-15 | 1.000000 | 4.48093e-15 | 1.000000 |
| rad28          | 4.14769e-15 | 1.000000 | 4.14769e-15 | 1.000000 |
| rad24          | 1.49622e-15 | 1.000000 | 1.49622e-15 | 1.000000 |
| PAH7+H         | 1.17305e-15 | 1.000000 | 1.17305e-15 | 1.000000 |
| rad59          | 9.19041e-16 | 1.000000 | 9.19041e-16 | 1.000000 |
| rad33          | 2.39764e-16 | 1.000000 | 2.39764e-16 | 1.000000 |
| rad38          | 1.42896e-16 | 1.000000 | 1.42896e-16 | 1.000000 |
| PAH9+H         | 1.77955e-17 | 1.000000 | 1.77955e-17 | 1.000000 |
| PAH10+CH3      | 9.93445e-18 | 1.000000 | 9.93445e-18 | 1.000000 |
| rad46          | 7.79408e-18 | 1.000000 | 7.79408e-18 | 1.000000 |
| rad43          | 1.09782e-18 | 1.000000 | 1.09782e-18 | 1.000000 |
| rad31          | 4.14869e-19 | 1.000000 | 4.14869e-19 | 1.000000 |
| rad70          | 9.57076e-20 | 1.000000 | 9.57076e-20 | 1.000000 |
| rad58          | 9.52332e-20 | 1.000000 | 9.52332e-20 | 1.000000 |
| rad50          | 4.90657e-20 | 1.000000 | 4.90657e-20 | 1.000000 |
| rad39          | 2.94692e-20 | 1.000000 | 2.94692e-20 | 1.000000 |
| rad62          | 1.10194e-20 | 1.000000 | 1.10194e-20 | 1.000000 |
| rad34          | 1.70388e-21 | 1.000000 | 1.70388e-21 | 1.000000 |
| PAH1+H         | 1.27530e-21 | 1.000000 | 1.27530e-21 | 1.000000 |
| rad54          | 1.15398e-21 | 1.000000 | 1.15398e-21 | 1.000000 |
| rad52          | 3.50627e-22 | 1.000000 | 3.50627e-22 | 1.000000 |
| rad51          | 1.08922e-22 | 1.000000 | 1.08922e-22 | 1.000000 |
| rad41          | 9.58127e-23 | 1.000000 | 9.58127e-23 | 1.000000 |
| rad55          | 1.11184e-23 | 1.000000 | 1.11184e-23 | 1.000000 |
| rad42          | 3.57534e-24 | 1.000000 | 3.57534e-24 | 1.000000 |
| rad65          | 1.18385e-25 | 1.000000 | 1.18385e-25 | 1.000000 |
| rad47          | 1.14269e-25 | 1.000000 | 1.14269e-25 | 1.000000 |
| rad61          | 3.09042e-27 | 1.000000 | 3.09042e-27 | 1.000000 |
| rad53          | 5.94209e-28 | 1.000000 | 5.94209e-28 | 1.000000 |
| rad68syn       | 1.61483e-28 | 1.000000 | 1.61483e-28 | 1.000000 |
| rad68anti      | 1.25734e-28 | 1.000000 | 1.25734e-28 | 1.000000 |
| rad19syn       | 1.16727e-30 | 1.000000 | 1.16727e-30 | 1.000000 |
| rad56          | 8.74985e-31 | 1.000000 | 8.74985e-31 | 1.000000 |
| rad64          | 4.66026e-31 | 1.000000 | 4.66026e-31 | 1.000000 |
| rad40syn       | 2.68384e-31 | 1.000000 | 2.68384e-31 | 1.000000 |
| rad40anti      | 2.07937e-31 | 1.000000 | 2.07937e-31 | 1.000000 |
| rad8           | 8.67145e-32 | 1.000000 | 8.67145e-32 | 1.000000 |
| PAH8+H         | 1.75891e-32 | 1.000000 | 1.75891e-32 | 1.000000 |
| rad73          | 1.27751e-33 | 1.000000 | 1.27751e-33 | 1.000000 |
| rad71          | 2.16860e-36 | 1.000000 | 2.16860e-36 | 1.000000 |

100000.000 Pa, 180.000000 K

=====

| Rate constant             | True (fraction)        | Effective (fraction)   |
|---------------------------|------------------------|------------------------|
| Total                     | 1.12884e-14 (1.00 )    | 1.12884e-14 (1.00 )    |
| Formation of rad19        | 1.12881e-14 (1.000 )   | 1.12881e-14 (1.000 )   |
| H-abstraction to cyc2enyl | 2.75916e-19 (2.44e-05) | 2.75916e-19 (2.44e-05) |
| H-abstraction to cyclenyl | 2.39955e-23 (2.13e-09) | 2.39955e-23 (2.13e-09) |

| species                       | PYtrue      | Cumul    | PYeffective | Cumul    |
|-------------------------------|-------------|----------|-------------|----------|
| rad9                          | 0.994096    | 0.994096 | 0.994096    | 0.994096 |
| rad15                         | 0.00360386  | 0.997700 | 0.00360386  | 0.997700 |
| Indene+H                      | 0.00227135  | 0.999971 | 0.00227135  | 0.999971 |
| Benzene+cycloprop-2-enylidene | 2.44424e-05 | 0.999995 | 2.44424e-05 | 0.999995 |
| rad19anti                     | 3.97515e-06 | 0.999999 | 3.97515e-06 | 0.999999 |
| PhCHCCH2+H                    | 4.32893e-07 | 1.000000 | 4.32893e-07 | 1.000000 |
| rad12                         | 8.72592e-08 | 1.000000 | 8.72592e-08 | 1.000000 |
| rad2                          | 1.74360e-08 | 1.000000 | 1.74360e-08 | 1.000000 |
| rad11                         | 1.72927e-08 | 1.000000 | 1.72927e-08 | 1.000000 |

|                               |             |          |             |          |
|-------------------------------|-------------|----------|-------------|----------|
| rad6                          | 4.94912e-09 | 1.000000 | 4.94912e-09 | 1.000000 |
| rad18                         | 3.63908e-09 | 1.000000 | 3.63908e-09 | 1.000000 |
| rad22                         | 3.31230e-09 | 1.000000 | 3.31230e-09 | 1.000000 |
| rad26                         | 2.63310e-09 | 1.000000 | 2.63310e-09 | 1.000000 |
| Benzene+cycloprop-1-enylidene | 2.12567e-09 | 1.000000 | 2.12567e-09 | 1.000000 |
| rad1                          | 1.26973e-09 | 1.000000 | 1.26973e-09 | 1.000000 |
| C2H2+PhCH2                    | 8.08201e-10 | 1.000000 | 8.08201e-10 | 1.000000 |
| rad67                         | 6.25807e-10 | 1.000000 | 6.25807e-10 | 1.000000 |
| rad45                         | 5.75198e-10 | 1.000000 | 5.75198e-10 | 1.000000 |
| rad35                         | 2.77053e-10 | 1.000000 | 2.77053e-10 | 1.000000 |
| rad20                         | 2.27627e-10 | 1.000000 | 2.27627e-10 | 1.000000 |
| rad10                         | 1.59740e-10 | 1.000000 | 1.59740e-10 | 1.000000 |
| rad21                         | 1.59044e-10 | 1.000000 | 1.59044e-10 | 1.000000 |
| rad23                         | 1.57722e-10 | 1.000000 | 1.57722e-10 | 1.000000 |
| rad7                          | 1.13303e-10 | 1.000000 | 1.13303e-10 | 1.000000 |
| rad3                          | 4.18731e-11 | 1.000000 | 4.18731e-11 | 1.000000 |
| rad36                         | 3.63573e-11 | 1.000000 | 3.63573e-11 | 1.000000 |
| rad4                          | 2.21845e-11 | 1.000000 | 2.21845e-11 | 1.000000 |
| PhCCCH3+H                     | 1.50359e-11 | 1.000000 | 1.50359e-11 | 1.000000 |
| Ph+MeAc                       | 1.03508e-11 | 1.000000 | 1.03508e-11 | 1.000000 |
| PhcycC3H3_A+H                 | 8.82545e-12 | 1.000000 | 8.82545e-12 | 1.000000 |
| rad5                          | 4.86374e-12 | 1.000000 | 4.86374e-12 | 1.000000 |
| Ph+Allene                     | 3.85975e-12 | 1.000000 | 3.85975e-12 | 1.000000 |
| rad30                         | 3.43760e-12 | 1.000000 | 3.43760e-12 | 1.000000 |
| PhCCH+CH3                     | 2.81247e-12 | 1.000000 | 2.81247e-12 | 1.000000 |
| rad25                         | 9.33146e-13 | 1.000000 | 9.33146e-13 | 1.000000 |
| PhCH2CCH+H                    | 7.13399e-13 | 1.000000 | 7.13399e-13 | 1.000000 |
| rad27                         | 3.51842e-13 | 1.000000 | 3.51842e-13 | 1.000000 |
| rad13                         | 1.40906e-13 | 1.000000 | 1.40906e-13 | 1.000000 |
| Phenyl+cycC3H4                | 8.44223e-14 | 1.000000 | 0.00000     | 1.000000 |
| PhcycC3H3_B+H                 | 2.61391e-14 | 1.000000 | 2.61391e-14 | 1.000000 |
| rad14                         | 1.58035e-14 | 1.000000 | 1.58035e-14 | 1.000000 |
| rad60syn                      | 1.41073e-14 | 1.000000 | 1.41073e-14 | 1.000000 |
| rad37                         | 8.13948e-15 | 1.000000 | 8.13948e-15 | 1.000000 |
| rad60anti                     | 6.88986e-15 | 1.000000 | 6.88986e-15 | 1.000000 |
| PAH3+H                        | 5.97778e-15 | 1.000000 | 5.97778e-15 | 1.000000 |
| rad28                         | 5.78214e-15 | 1.000000 | 5.78214e-15 | 1.000000 |
| PAH7+H                        | 1.64690e-15 | 1.000000 | 1.64690e-15 | 1.000000 |
| rad24                         | 1.43390e-15 | 1.000000 | 1.43390e-15 | 1.000000 |
| rad59                         | 1.21795e-15 | 1.000000 | 1.21795e-15 | 1.000000 |
| rad33                         | 2.84027e-16 | 1.000000 | 2.84027e-16 | 1.000000 |
| rad38                         | 2.01200e-16 | 1.000000 | 2.01200e-16 | 1.000000 |
| PAH9+H                        | 2.76085e-17 | 1.000000 | 2.76085e-17 | 1.000000 |
| PAH10+CH3                     | 1.50614e-17 | 1.000000 | 1.50614e-17 | 1.000000 |
| rad46                         | 1.11806e-17 | 1.000000 | 1.11806e-17 | 1.000000 |
| rad43                         | 1.73008e-18 | 1.000000 | 1.73008e-18 | 1.000000 |
| rad31                         | 4.94412e-19 | 1.000000 | 4.94412e-19 | 1.000000 |
| rad70                         | 1.57671e-19 | 1.000000 | 1.57671e-19 | 1.000000 |
| rad58                         | 1.47477e-19 | 1.000000 | 1.47477e-19 | 1.000000 |
| rad50                         | 7.57348e-20 | 1.000000 | 7.57348e-20 | 1.000000 |
| rad39                         | 4.98944e-20 | 1.000000 | 4.98944e-20 | 1.000000 |
| rad62                         | 2.10896e-20 | 1.000000 | 2.10896e-20 | 1.000000 |
| rad34                         | 3.07244e-21 | 1.000000 | 3.07244e-21 | 1.000000 |
| PAH1+H                        | 2.26591e-21 | 1.000000 | 2.26591e-21 | 1.000000 |
| rad54                         | 1.98069e-21 | 1.000000 | 1.98069e-21 | 1.000000 |
| rad52                         | 5.70987e-22 | 1.000000 | 5.70987e-22 | 1.000000 |
| rad41                         | 1.93137e-22 | 1.000000 | 1.93137e-22 | 1.000000 |
| rad51                         | 1.88475e-22 | 1.000000 | 1.88475e-22 | 1.000000 |
| rad55                         | 2.05562e-23 | 1.000000 | 2.05562e-23 | 1.000000 |
| rad42                         | 8.53441e-24 | 1.000000 | 8.53441e-24 | 1.000000 |
| rad65                         | 2.38955e-25 | 1.000000 | 2.38955e-25 | 1.000000 |
| rad47                         | 1.54231e-25 | 1.000000 | 1.54231e-25 | 1.000000 |
| rad61                         | 1.13534e-26 | 1.000000 | 1.13534e-26 | 1.000000 |
| rad53                         | 1.69894e-27 | 1.000000 | 1.69894e-27 | 1.000000 |
| rad68syn                      | 7.10738e-28 | 1.000000 | 7.10738e-28 | 1.000000 |
| rad68anti                     | 5.49184e-28 | 1.000000 | 5.49184e-28 | 1.000000 |
| rad56                         | 4.07790e-30 | 1.000000 | 4.07790e-30 | 1.000000 |
| rad19syn                      | 3.30969e-30 | 1.000000 | 3.30969e-30 | 1.000000 |
| rad40syn                      | 1.86530e-30 | 1.000000 | 1.86530e-30 | 1.000000 |
| rad64                         | 1.71096e-30 | 1.000000 | 1.71096e-30 | 1.000000 |
| rad40anti                     | 1.44407e-30 | 1.000000 | 1.44407e-30 | 1.000000 |
| PAH8+H                        | 1.63583e-31 | 1.000000 | 1.63583e-31 | 1.000000 |
| rad8                          | 4.88658e-32 | 1.000000 | 4.88658e-32 | 1.000000 |
| rad73                         | 8.54557e-33 | 1.000000 | 8.54557e-33 | 1.000000 |
| rad71                         | 2.30131e-35 | 1.000000 | 2.30131e-35 | 1.000000 |

100000.000 Pa, 190.000000 K

=====

Rate constant | True (fraction) | Effective (fraction)

-----

|                           |  |                        |  |                        |
|---------------------------|--|------------------------|--|------------------------|
| Total                     |  | 1.32132e-14 (1.00 )    |  | 1.32132e-14 (1.00 )    |
| Formation of rad19        |  | 1.32126e-14 (1.000 )   |  | 1.32126e-14 (1.000 )   |
| H-abstraction to cyc2enyl |  | 5.62053e-19 (4.25e-05) |  | 5.62053e-19 (4.25e-05) |
| H-abstraction to cyc1enyl |  | 8.18073e-23 (6.19e-09) |  | 8.18073e-23 (6.19e-09) |

| species                       |  | PYtrue      | Cumul    |  | PYeffective | Cumul    |
|-------------------------------|--|-------------|----------|--|-------------|----------|
| rad9                          |  | 0.993875    | 0.993875 |  | 0.993875    | 0.993875 |
| rad15                         |  | 0.00358519  | 0.997460 |  | 0.00358519  | 0.997460 |
| Indene+H                      |  | 0.00249324  | 0.999953 |  | 0.00249324  | 0.999953 |
| Benzene+cycloprop-2-enylidene |  | 4.25373e-05 | 0.999996 |  | 4.25373e-05 | 0.999996 |
| rad19anti                     |  | 3.18166e-06 | 0.999999 |  | 3.18166e-06 | 0.999999 |
| PhCHCCH2+H                    |  | 4.92808e-07 | 0.999999 |  | 4.92808e-07 | 0.999999 |
| rad12                         |  | 8.42808e-08 | 0.999999 |  | 8.42808e-08 | 0.999999 |
| rad2                          |  | 1.99428e-08 | 0.999999 |  | 1.99428e-08 | 0.999999 |
| rad11                         |  | 1.92992e-08 | 0.999999 |  | 1.92992e-08 | 0.999999 |
| Benzene+cycloprop-1-enylidene |  | 6.19133e-09 | 0.999999 |  | 6.19133e-09 | 0.999999 |
| rad6                          |  | 6.07515e-09 | 0.999999 |  | 6.07515e-09 | 0.999999 |
| rad22                         |  | 3.84269e-09 | 0.999999 |  | 3.84269e-09 | 0.999999 |
| rad18                         |  | 3.64906e-09 | 1.000000 |  | 3.64906e-09 | 1.000000 |
| rad26                         |  | 3.01119e-09 | 1.000000 |  | 3.01119e-09 | 1.000000 |
| rad1                          |  | 1.45751e-09 | 1.000000 |  | 1.45751e-09 | 1.000000 |
| C2H2+PhCH2                    |  | 9.96458e-10 | 1.000000 |  | 9.96458e-10 | 1.000000 |
| rad67                         |  | 7.48224e-10 | 1.000000 |  | 7.48224e-10 | 1.000000 |
| rad45                         |  | 6.82277e-10 | 1.000000 |  | 6.82277e-10 | 1.000000 |
| rad35                         |  | 3.30133e-10 | 1.000000 |  | 3.30133e-10 | 1.000000 |
| rad20                         |  | 2.32308e-10 | 1.000000 |  | 2.32308e-10 | 1.000000 |
| rad23                         |  | 2.04117e-10 | 1.000000 |  | 2.04117e-10 | 1.000000 |
| rad10                         |  | 2.01619e-10 | 1.000000 |  | 2.01619e-10 | 1.000000 |
| rad21                         |  | 1.62484e-10 | 1.000000 |  | 1.62484e-10 | 1.000000 |
| rad7                          |  | 1.19344e-10 | 1.000000 |  | 1.19344e-10 | 1.000000 |
| rad3                          |  | 5.25810e-11 | 1.000000 |  | 5.25810e-11 | 1.000000 |
| rad36                         |  | 4.31879e-11 | 1.000000 |  | 4.31879e-11 | 1.000000 |
| rad4                          |  | 2.78754e-11 | 1.000000 |  | 2.78754e-11 | 1.000000 |
| PhCCCH3+H                     |  | 1.98446e-11 | 1.000000 |  | 1.98446e-11 | 1.000000 |
| Ph+MeAc                       |  | 1.39321e-11 | 1.000000 |  | 1.39321e-11 | 1.000000 |
| PhcycC3H3_A+H                 |  | 1.17500e-11 | 1.000000 |  | 1.17500e-11 | 1.000000 |
| rad5                          |  | 5.86933e-12 | 1.000000 |  | 5.86933e-12 | 1.000000 |
| Ph+Allene                     |  | 5.09254e-12 | 1.000000 |  | 5.09254e-12 | 1.000000 |
| rad30                         |  | 4.21432e-12 | 1.000000 |  | 4.21432e-12 | 1.000000 |
| PhCCH+CH3                     |  | 4.11400e-12 | 1.000000 |  | 4.11400e-12 | 1.000000 |
| rad25                         |  | 1.06022e-12 | 1.000000 |  | 1.06022e-12 | 1.000000 |
| PhCH2CCH+H                    |  | 9.65027e-13 | 1.000000 |  | 9.65027e-13 | 1.000000 |
| rad27                         |  | 4.02933e-13 | 1.000000 |  | 4.02933e-13 | 1.000000 |
| rad13                         |  | 1.69863e-13 | 1.000000 |  | 1.69863e-13 | 1.000000 |
| Phenyl+cycC3H4                |  | 1.24558e-13 | 1.000000 |  | 0.00000     | 1.000000 |
| PhcycC3H3_B+H                 |  | 4.72176e-14 | 1.000000 |  | 4.72176e-14 | 1.000000 |
| rad14                         |  | 2.12961e-14 | 1.000000 |  | 2.12961e-14 | 1.000000 |
| rad60syn                      |  | 1.79821e-14 | 1.000000 |  | 1.79821e-14 | 1.000000 |
| rad37                         |  | 1.10130e-14 | 1.000000 |  | 1.10130e-14 | 1.000000 |
| rad60anti                     |  | 8.81216e-15 | 1.000000 |  | 8.81216e-15 | 1.000000 |
| rad28                         |  | 8.10468e-15 | 1.000000 |  | 8.10468e-15 | 1.000000 |
| PAH3+H                        |  | 7.98295e-15 | 1.000000 |  | 7.98295e-15 | 1.000000 |
| PAH7+H                        |  | 2.31740e-15 | 1.000000 |  | 2.31740e-15 | 1.000000 |
| rad59                         |  | 1.61512e-15 | 1.000000 |  | 1.61512e-15 | 1.000000 |
| rad24                         |  | 1.37837e-15 | 1.000000 |  | 1.37837e-15 | 1.000000 |
| rad33                         |  | 3.37018e-16 | 1.000000 |  | 3.37018e-16 | 1.000000 |
| rad38                         |  | 2.83999e-16 | 1.000000 |  | 2.83999e-16 | 1.000000 |
| PAH9+H                        |  | 4.28968e-17 | 1.000000 |  | 4.28968e-17 | 1.000000 |
| PAH10+CH3                     |  | 2.31102e-17 | 1.000000 |  | 2.31102e-17 | 1.000000 |
| rad46                         |  | 1.60844e-17 | 1.000000 |  | 1.60844e-17 | 1.000000 |
| rad43                         |  | 2.75008e-18 | 1.000000 |  | 2.75008e-18 | 1.000000 |
| rad31                         |  | 5.92836e-19 | 1.000000 |  | 5.92836e-19 | 1.000000 |
| rad70                         |  | 2.61526e-19 | 1.000000 |  | 2.61526e-19 | 1.000000 |
| rad58                         |  | 2.29455e-19 | 1.000000 |  | 2.29455e-19 | 1.000000 |
| rad50                         |  | 1.17789e-19 | 1.000000 |  | 1.17789e-19 | 1.000000 |
| rad39                         |  | 8.57744e-20 | 1.000000 |  | 8.57744e-20 | 1.000000 |
| rad62                         |  | 4.06649e-20 | 1.000000 |  | 4.06649e-20 | 1.000000 |
| rad34                         |  | 5.57128e-21 | 1.000000 |  | 5.57128e-21 | 1.000000 |
| PAH1+H                        |  | 4.08230e-21 | 1.000000 |  | 4.08230e-21 | 1.000000 |
| rad54                         |  | 3.44513e-21 | 1.000000 |  | 3.44513e-21 | 1.000000 |
| rad52                         |  | 9.39353e-22 | 1.000000 |  | 9.39353e-22 | 1.000000 |
| rad41                         |  | 3.90970e-22 | 1.000000 |  | 3.90970e-22 | 1.000000 |
| rad51                         |  | 3.30116e-22 | 1.000000 |  | 3.30116e-22 | 1.000000 |
| rad55                         |  | 3.85398e-23 | 1.000000 |  | 3.85398e-23 | 1.000000 |
| rad42                         |  | 2.03619e-23 | 1.000000 |  | 2.03619e-23 | 1.000000 |
| rad65                         |  | 4.88124e-25 | 1.000000 |  | 4.88124e-25 | 1.000000 |
| rad47                         |  | 2.07837e-25 | 1.000000 |  | 2.07837e-25 | 1.000000 |
| rad61                         |  | 3.90768e-26 | 1.000000 |  | 3.90768e-26 | 1.000000 |
| rad53                         |  | 4.77664e-27 | 1.000000 |  | 4.77664e-27 | 1.000000 |

|           |             |          |             |          |
|-----------|-------------|----------|-------------|----------|
| rad68syn  | 2.84858e-27 | 1.000000 | 2.84858e-27 | 1.000000 |
| rad68anti | 2.18393e-27 | 1.000000 | 2.18393e-27 | 1.000000 |
| rad56     | 1.75822e-29 | 1.000000 | 1.75822e-29 | 1.000000 |
| rad40syn  | 1.12698e-29 | 1.000000 | 1.12698e-29 | 1.000000 |
| rad19syn  | 9.89671e-30 | 1.000000 | 9.89671e-30 | 1.000000 |
| rad40anti | 8.72412e-30 | 1.000000 | 8.72412e-30 | 1.000000 |
| rad64     | 6.14267e-30 | 1.000000 | 6.14267e-30 | 1.000000 |
| PAH8+H    | 1.27350e-30 | 1.000000 | 1.27350e-30 | 1.000000 |
| rad73     | 5.05728e-32 | 1.000000 | 5.05728e-32 | 1.000000 |
| rad8      | 2.96711e-32 | 1.000000 | 2.96711e-32 | 1.000000 |
| rad71     | 2.02417e-34 | 1.000000 | 2.02417e-34 | 1.000000 |

100000.000 Pa, 200.000000 K

| Rate constant             | True (fraction)        | Effective (fraction)   |
|---------------------------|------------------------|------------------------|
| Total                     | 1.52621e-14 (1.00)     | 1.52621e-14 (1.00)     |
| Formation of rad19        | 1.52610e-14 (1.000)    | 1.52610e-14 (1.000)    |
| H-abstraction to cyc2enyl | 1.06427e-18 (6.97e-05) | 1.06427e-18 (6.97e-05) |
| H-abstraction to cyclenyl | 2.46309e-22 (1.61e-08) | 2.46309e-22 (1.61e-08) |

| species                       | PYtrue      | Cumul    | PYeffective | Cumul    |
|-------------------------------|-------------|----------|-------------|----------|
| rad9                          | 0.993632    | 0.993632 | 0.993632    | 0.993632 |
| rad15                         | 0.00356538  | 0.997197 | 0.00356538  | 0.997197 |
| Indene+H                      | 0.00272933  | 0.999926 | 0.00272933  | 0.999926 |
| Benzene+cycloprop-2-enylidene | 6.97330e-05 | 0.999996 | 6.97330e-05 | 0.999996 |
| rad19anti                     | 2.64432e-06 | 0.999999 | 2.64432e-06 | 0.999999 |
| PhCHCCH2+H                    | 5.61668e-07 | 0.999999 | 5.61668e-07 | 0.999999 |
| rad12                         | 8.16441e-08 | 0.999999 | 8.16441e-08 | 0.999999 |
| rad2                          | 2.28375e-08 | 0.999999 | 2.28375e-08 | 0.999999 |
| rad11                         | 2.15249e-08 | 0.999999 | 2.15249e-08 | 0.999999 |
| Benzene+cycloprop-1-enylidene | 1.61386e-08 | 0.999999 | 1.61386e-08 | 0.999999 |
| rad6                          | 7.45740e-09 | 0.999999 | 7.45740e-09 | 0.999999 |
| rad22                         | 4.43939e-09 | 0.999999 | 4.43939e-09 | 0.999999 |
| rad18                         | 3.64593e-09 | 0.999999 | 3.64593e-09 | 0.999999 |
| rad26                         | 3.44803e-09 | 1.000000 | 3.44803e-09 | 1.000000 |
| rad1                          | 1.67654e-09 | 1.000000 | 1.67654e-09 | 1.000000 |
| C2H2+PhCH2                    | 1.22637e-09 | 1.000000 | 1.22637e-09 | 1.000000 |
| rad67                         | 8.94922e-10 | 1.000000 | 8.94922e-10 | 1.000000 |
| rad45                         | 8.07410e-10 | 1.000000 | 8.07410e-10 | 1.000000 |
| rad35                         | 3.93478e-10 | 1.000000 | 3.93478e-10 | 1.000000 |
| rad23                         | 2.63269e-10 | 1.000000 | 2.63269e-10 | 1.000000 |
| rad10                         | 2.54948e-10 | 1.000000 | 2.54948e-10 | 1.000000 |
| rad20                         | 2.36290e-10 | 1.000000 | 2.36290e-10 | 1.000000 |
| rad21                         | 1.65446e-10 | 1.000000 | 1.65446e-10 | 1.000000 |
| rad7                          | 1.25989e-10 | 1.000000 | 1.25989e-10 | 1.000000 |
| rad3                          | 6.60564e-11 | 1.000000 | 6.60564e-11 | 1.000000 |
| rad36                         | 5.12072e-11 | 1.000000 | 5.12072e-11 | 1.000000 |
| rad4                          | 3.50513e-11 | 1.000000 | 3.50513e-11 | 1.000000 |
| PhCCCH3+H                     | 2.63265e-11 | 1.000000 | 2.63265e-11 | 1.000000 |
| Ph+MeAc                       | 1.88734e-11 | 1.000000 | 1.88734e-11 | 1.000000 |
| PhcycC3H3_A+H                 | 1.57049e-11 | 1.000000 | 1.57049e-11 | 1.000000 |
| rad5                          | 7.11426e-12 | 1.000000 | 7.11426e-12 | 1.000000 |
| Ph+Allene                     | 6.74795e-12 | 1.000000 | 6.74795e-12 | 1.000000 |
| PhCCH+CH3                     | 6.05109e-12 | 1.000000 | 6.05109e-12 | 1.000000 |
| rad30                         | 5.15888e-12 | 1.000000 | 5.15888e-12 | 1.000000 |
| PhCH2CCH+H                    | 1.31283e-12 | 1.000000 | 1.31283e-12 | 1.000000 |
| rad25                         | 1.20107e-12 | 1.000000 | 1.20107e-12 | 1.000000 |
| rad27                         | 4.61293e-13 | 1.000000 | 4.61293e-13 | 1.000000 |
| rad13                         | 2.05047e-13 | 1.000000 | 2.05047e-13 | 1.000000 |
| Phenyl+cycC3H4                | 1.83567e-13 | 1.000000 | 0.00000     | 1.000000 |
| PhcycC3H3_B+H                 | 8.32075e-14 | 1.000000 | 8.32075e-14 | 1.000000 |
| rad14                         | 2.86299e-14 | 1.000000 | 2.86299e-14 | 1.000000 |
| rad60syn                      | 2.29239e-14 | 1.000000 | 2.29239e-14 | 1.000000 |
| rad37                         | 1.49992e-14 | 1.000000 | 1.49992e-14 | 1.000000 |
| rad28                         | 1.14351e-14 | 1.000000 | 1.14351e-14 | 1.000000 |
| rad60anti                     | 1.12736e-14 | 1.000000 | 1.12736e-14 | 1.000000 |
| PAH3+H                        | 1.06833e-14 | 1.000000 | 1.06833e-14 | 1.000000 |
| PAH7+H                        | 3.27150e-15 | 1.000000 | 3.27150e-15 | 1.000000 |
| rad59                         | 2.14548e-15 | 1.000000 | 2.14548e-15 | 1.000000 |
| rad24                         | 1.33001e-15 | 1.000000 | 1.33001e-15 | 1.000000 |
| rad38                         | 4.02416e-16 | 1.000000 | 4.02416e-16 | 1.000000 |
| rad33                         | 4.00795e-16 | 1.000000 | 4.00795e-16 | 1.000000 |
| PAH9+H                        | 6.68565e-17 | 1.000000 | 6.68565e-17 | 1.000000 |
| PAH10+CH3                     | 3.59041e-17 | 1.000000 | 3.59041e-17 | 1.000000 |
| rad46                         | 2.32353e-17 | 1.000000 | 2.32353e-17 | 1.000000 |
| rad43                         | 4.41153e-18 | 1.000000 | 4.41153e-18 | 1.000000 |
| rad31                         | 7.15940e-19 | 1.000000 | 7.15940e-19 | 1.000000 |
| rad70                         | 4.36590e-19 | 1.000000 | 4.36590e-19 | 1.000000 |

|           |             |          |             |          |
|-----------|-------------|----------|-------------|----------|
| rad58     | 3.58684e-19 | 1.000000 | 3.58684e-19 | 1.000000 |
| rad50     | 1.84767e-19 | 1.000000 | 1.84767e-19 | 1.000000 |
| rad39     | 1.49857e-19 | 1.000000 | 1.49857e-19 | 1.000000 |
| rad62     | 7.88928e-20 | 1.000000 | 7.88928e-20 | 1.000000 |
| rad34     | 1.01475e-20 | 1.000000 | 1.01475e-20 | 1.000000 |
| PAH1+H    | 7.44956e-21 | 1.000000 | 7.44956e-21 | 1.000000 |
| rad54     | 6.07288e-21 | 1.000000 | 6.07288e-21 | 1.000000 |
| rad52     | 1.56194e-21 | 1.000000 | 1.56194e-21 | 1.000000 |
| rad41     | 7.93900e-22 | 1.000000 | 7.93900e-22 | 1.000000 |
| rad51     | 5.85167e-22 | 1.000000 | 5.85167e-22 | 1.000000 |
| rad55     | 7.32087e-23 | 1.000000 | 7.32087e-23 | 1.000000 |
| rad42     | 4.84230e-23 | 1.000000 | 4.84230e-23 | 1.000000 |
| rad65     | 1.00804e-24 | 1.000000 | 1.00804e-24 | 1.000000 |
| rad47     | 2.79989e-25 | 1.000000 | 2.79989e-25 | 1.000000 |
| rad61     | 1.27145e-25 | 1.000000 | 1.27145e-25 | 1.000000 |
| rad53     | 1.32156e-26 | 1.000000 | 1.32156e-26 | 1.000000 |
| rad68syn  | 1.05273e-26 | 1.000000 | 1.05273e-26 | 1.000000 |
| rad68anti | 8.00841e-27 | 1.000000 | 8.00841e-27 | 1.000000 |
| rad56     | 7.07911e-29 | 1.000000 | 7.07911e-29 | 1.000000 |
| rad40syn  | 6.01798e-29 | 1.000000 | 6.01798e-29 | 1.000000 |
| rad40anti | 4.66223e-29 | 1.000000 | 4.66223e-29 | 1.000000 |
| rad19syn  | 3.11946e-29 | 1.000000 | 3.11946e-29 | 1.000000 |
| rad64     | 2.15702e-29 | 1.000000 | 2.15702e-29 | 1.000000 |
| PAH8+H    | 8.45761e-30 | 1.000000 | 8.45761e-30 | 1.000000 |
| rad73     | 2.68424e-31 | 1.000000 | 2.68424e-31 | 1.000000 |
| rad8      | 1.93156e-32 | 1.000000 | 1.93156e-32 | 1.000000 |
| rad71     | 1.50323e-33 | 1.000000 | 1.50323e-33 | 1.000000 |

100000.000 Pa, 210.000000 K

| Rate constant             | True (fraction)        | Effective (fraction)   |
|---------------------------|------------------------|------------------------|
| Total                     | 1.74272e-14 (1.00 )    | 1.74272e-14 (1.00 )    |
| Formation of rad19        | 1.74253e-14 (1.000 )   | 1.74253e-14 (1.000 )   |
| H-abstraction to cyc2enyl | 1.89310e-18 (0.000109) | 1.89310e-18 (0.000109) |
| H-abstraction to cyclenyl | 6.66714e-22 (3.83e-08) | 6.66714e-22 (3.83e-08) |

| species                       | PYtrue      | Cumul    | PYeffective | Cumul    |
|-------------------------------|-------------|----------|-------------|----------|
| rad9                          | 0.993362    | 0.993362 | 0.993362    | 0.993362 |
| rad15                         | 0.00354486  | 0.996907 | 0.00354486  | 0.996907 |
| Indene+H                      | 0.00298135  | 0.999888 | 0.00298135  | 0.999888 |
| Benzene+cycloprop-2-enylidene | 0.000108629 | 0.999997 | 0.000108629 | 0.999997 |
| rad19anti                     | 2.27972e-06 | 0.999999 | 2.27972e-06 | 0.999999 |
| PhCHCCH2+H                    | 6.41223e-07 | 1.000000 | 6.41223e-07 | 1.000000 |
| rad12                         | 7.93018e-08 | 1.000000 | 7.93018e-08 | 1.000000 |
| Benzene+cycloprop-1-enylidene | 3.82571e-08 | 1.000000 | 3.82571e-08 | 1.000000 |
| rad2                          | 2.61965e-08 | 1.000000 | 2.61965e-08 | 1.000000 |
| rad11                         | 2.39985e-08 | 1.000000 | 2.39985e-08 | 1.000000 |
| rad6                          | 9.16027e-09 | 1.000000 | 9.16027e-09 | 1.000000 |
| rad22                         | 5.11100e-09 | 1.000000 | 5.11100e-09 | 1.000000 |
| rad26                         | 3.95534e-09 | 1.000000 | 3.95534e-09 | 1.000000 |
| rad18                         | 3.63152e-09 | 1.000000 | 3.63152e-09 | 1.000000 |
| rad1                          | 1.93345e-09 | 1.000000 | 1.93345e-09 | 1.000000 |
| C2H2+PhCH2                    | 1.50809e-09 | 1.000000 | 1.50809e-09 | 1.000000 |
| rad67                         | 1.07153e-09 | 1.000000 | 1.07153e-09 | 1.000000 |
| rad45                         | 9.54093e-10 | 1.000000 | 9.54093e-10 | 1.000000 |
| rad35                         | 4.69419e-10 | 1.000000 | 4.69419e-10 | 1.000000 |
| rad23                         | 3.38766e-10 | 1.000000 | 3.38766e-10 | 1.000000 |
| rad10                         | 3.23229e-10 | 1.000000 | 3.23229e-10 | 1.000000 |
| rad20                         | 2.39711e-10 | 1.000000 | 2.39711e-10 | 1.000000 |
| rad21                         | 1.68029e-10 | 1.000000 | 1.68029e-10 | 1.000000 |
| rad7                          | 1.33300e-10 | 1.000000 | 1.33300e-10 | 1.000000 |
| rad3                          | 8.30635e-11 | 1.000000 | 8.30635e-11 | 1.000000 |
| rad36                         | 6.06572e-11 | 1.000000 | 6.06572e-11 | 1.000000 |
| rad4                          | 4.41282e-11 | 1.000000 | 4.41282e-11 | 1.000000 |
| PhCCCH3+H                     | 3.51369e-11 | 1.000000 | 3.51369e-11 | 1.000000 |
| Ph+MeAc                       | 2.57532e-11 | 1.000000 | 2.57532e-11 | 1.000000 |
| PhcycC3H3_A+H                 | 2.10593e-11 | 1.000000 | 2.10593e-11 | 1.000000 |
| Ph+Allene                     | 8.98537e-12 | 1.000000 | 8.98537e-12 | 1.000000 |
| PhCCH+CH3                     | 8.95334e-12 | 1.000000 | 8.95334e-12 | 1.000000 |
| rad5                          | 8.66290e-12 | 1.000000 | 8.66290e-12 | 1.000000 |
| rad30                         | 6.31163e-12 | 1.000000 | 6.31163e-12 | 1.000000 |
| PhCH2CCH+H                    | 1.79703e-12 | 1.000000 | 1.79703e-12 | 1.000000 |
| rad25                         | 1.35725e-12 | 1.000000 | 1.35725e-12 | 1.000000 |
| rad27                         | 5.28290e-13 | 1.000000 | 5.28290e-13 | 1.000000 |
| Phenyl+cycC3H4                | 2.70151e-13 | 1.000000 | 0.000000    | 1.000000 |
| rad13                         | 2.47985e-13 | 1.000000 | 2.47985e-13 | 1.000000 |
| PhcycC3H3_B+H                 | 1.43508e-13 | 1.000000 | 1.43508e-13 | 1.000000 |
| rad14                         | 3.84096e-14 | 1.000000 | 3.84096e-14 | 1.000000 |

|           |             |         |             |         |
|-----------|-------------|---------|-------------|---------|
| rad60syn  | 2.92528e-14 | 1.00000 | 2.92528e-14 | 1.00000 |
| rad37     | 2.05789e-14 | 1.00000 | 2.05789e-14 | 1.00000 |
| rad28     | 1.62525e-14 | 1.00000 | 1.62525e-14 | 1.00000 |
| rad60anti | 1.44388e-14 | 1.00000 | 1.44388e-14 | 1.00000 |
| PAH3+H    | 1.43379e-14 | 1.00000 | 1.43379e-14 | 1.00000 |
| PAH7+H    | 4.63609e-15 | 1.00000 | 4.63609e-15 | 1.00000 |
| rad59     | 2.85710e-15 | 1.00000 | 2.85710e-15 | 1.00000 |
| rad24     | 1.28916e-15 | 1.00000 | 1.28916e-15 | 1.00000 |
| rad38     | 5.73007e-16 | 1.00000 | 5.73007e-16 | 1.00000 |
| rad33     | 4.77927e-16 | 1.00000 | 4.77927e-16 | 1.00000 |
| PAH9+H    | 1.04635e-16 | 1.00000 | 1.04635e-16 | 1.00000 |
| PAH10+CH3 | 5.64754e-17 | 1.00000 | 5.64754e-17 | 1.00000 |
| rad46     | 3.37376e-17 | 1.00000 | 3.37376e-17 | 1.00000 |
| rad43     | 7.14178e-18 | 1.00000 | 7.14178e-18 | 1.00000 |
| rad31     | 8.71608e-19 | 1.00000 | 8.71608e-19 | 1.00000 |
| rad70     | 7.32964e-19 | 1.00000 | 7.32964e-19 | 1.00000 |
| rad58     | 5.63148e-19 | 1.00000 | 5.63148e-19 | 1.00000 |
| rad50     | 2.92460e-19 | 1.00000 | 2.92460e-19 | 1.00000 |
| rad39     | 2.66105e-19 | 1.00000 | 2.66105e-19 | 1.00000 |
| rad62     | 1.53713e-19 | 1.00000 | 1.53713e-19 | 1.00000 |
| rad34     | 1.85391e-20 | 1.00000 | 1.85391e-20 | 1.00000 |
| PAH1+H    | 1.37502e-20 | 1.00000 | 1.37502e-20 | 1.00000 |
| rad54     | 1.08419e-20 | 1.00000 | 1.08419e-20 | 1.00000 |
| rad52     | 2.62502e-21 | 1.00000 | 2.62502e-21 | 1.00000 |
| rad41     | 1.61509e-21 | 1.00000 | 1.61509e-21 | 1.00000 |
| rad51     | 1.04912e-21 | 1.00000 | 1.04912e-21 | 1.00000 |
| rad55     | 1.40694e-22 | 1.00000 | 1.40694e-22 | 1.00000 |
| rad42     | 1.14469e-22 | 1.00000 | 1.14469e-22 | 1.00000 |
| rad65     | 2.10121e-24 | 1.00000 | 2.10121e-24 | 1.00000 |
| rad61     | 3.93825e-25 | 1.00000 | 3.93825e-25 | 1.00000 |
| rad47     | 3.77538e-25 | 1.00000 | 3.77538e-25 | 1.00000 |
| rad68syn  | 3.62320e-26 | 1.00000 | 3.62320e-26 | 1.00000 |
| rad53     | 3.59837e-26 | 1.00000 | 3.59837e-26 | 1.00000 |
| rad68anti | 2.73559e-26 | 1.00000 | 2.73559e-26 | 1.00000 |
| rad40syn  | 2.87737e-28 | 1.00000 | 2.87737e-28 | 1.00000 |
| rad56     | 2.67911e-28 | 1.00000 | 2.67911e-28 | 1.00000 |
| rad40anti | 2.23301e-28 | 1.00000 | 2.23301e-28 | 1.00000 |
| rad19syn  | 1.03563e-28 | 1.00000 | 1.03563e-28 | 1.00000 |
| rad64     | 7.39859e-29 | 1.00000 | 7.39859e-29 | 1.00000 |
| PAH8+H    | 4.86626e-29 | 1.00000 | 4.86626e-29 | 1.00000 |
| rad73     | 1.29087e-30 | 1.00000 | 1.29087e-30 | 1.00000 |
| rad8      | 1.34441e-32 | 1.00000 | 1.34441e-32 | 1.00000 |
| rad71     | 9.57290e-33 | 1.00000 | 9.57290e-33 | 1.00000 |

100000.000 Pa, 220.000000 K

=====

| Rate constant             | True (fraction)        | Effective (fraction)   |
|---------------------------|------------------------|------------------------|
| Total                     | 1.97009e-14 (1.00 )    | 1.97009e-14 (1.00 )    |
| Formation of rad19        | 1.96977e-14 (1.000 )   | 1.96977e-14 (1.000 )   |
| H-abstraction to cyc2enyl | 3.19064e-18 (0.000162) | 3.19064e-18 (0.000162) |
| H-abstraction to cyclenyl | 1.64627e-21 (8.36e-08) | 1.64627e-21 (8.36e-08) |

| species                       | PYtrue      | Cumul    | PYeffective | Cumul    |
|-------------------------------|-------------|----------|-------------|----------|
| rad9                          | 0.993060    | 0.993060 | 0.993060    | 0.993060 |
| rad15                         | 0.00352397  | 0.996584 | 0.00352397  | 0.996584 |
| Indene+H                      | 0.00325117  | 0.999835 | 0.00325117  | 0.999835 |
| Benzene+cycloprop-2-enylidene | 0.000161954 | 0.999997 | 0.000161954 | 0.999997 |
| rad19anti                     | 2.03665e-06 | 0.999999 | 2.03665e-06 | 0.999999 |
| PhCHCCH2+H                    | 7.33576e-07 | 1.000000 | 7.33576e-07 | 1.000000 |
| Benzene+cycloprop-1-enylidene | 8.35632e-08 | 1.000000 | 8.35632e-08 | 1.000000 |
| rad12                         | 7.72159e-08 | 1.000000 | 7.72159e-08 | 1.000000 |
| rad2                          | 3.01108e-08 | 1.000000 | 3.01108e-08 | 1.000000 |
| rad11                         | 2.67505e-08 | 1.000000 | 2.67505e-08 | 1.000000 |
| rad6                          | 1.12650e-08 | 1.000000 | 1.12650e-08 | 1.000000 |
| rad22                         | 5.86707e-09 | 1.000000 | 5.86707e-09 | 1.000000 |
| rad26                         | 4.54731e-09 | 1.000000 | 4.54731e-09 | 1.000000 |
| rad18                         | 3.60753e-09 | 1.000000 | 3.60753e-09 | 1.000000 |
| rad1                          | 2.23634e-09 | 1.000000 | 2.23634e-09 | 1.000000 |
| C2H2+PhCH2                    | 1.85439e-09 | 1.000000 | 1.85439e-09 | 1.000000 |
| rad67                         | 1.28507e-09 | 1.000000 | 1.28507e-09 | 1.000000 |
| rad45                         | 1.12657e-09 | 1.000000 | 1.12657e-09 | 1.000000 |
| rad35                         | 5.60856e-10 | 1.000000 | 5.60856e-10 | 1.000000 |
| rad23                         | 4.35240e-10 | 1.000000 | 4.35240e-10 | 1.000000 |
| rad10                         | 4.11099e-10 | 1.000000 | 4.11099e-10 | 1.000000 |
| rad20                         | 2.42706e-10 | 1.000000 | 2.42706e-10 | 1.000000 |
| rad21                         | 1.70328e-10 | 1.000000 | 1.70328e-10 | 1.000000 |
| rad7                          | 1.41342e-10 | 1.000000 | 1.41342e-10 | 1.000000 |
| rad3                          | 1.04574e-10 | 1.000000 | 1.04574e-10 | 1.000000 |



|                |             |         |             |         |
|----------------|-------------|---------|-------------|---------|
| rad36          | 7.18341e-11 | 1.00000 | 7.18341e-11 | 1.00000 |
| rad4           | 5.56381e-11 | 1.00000 | 5.56381e-11 | 1.00000 |
| PhCCCH3+H      | 4.72083e-11 | 1.00000 | 4.72083e-11 | 1.00000 |
| Ph+MeAc        | 3.54162e-11 | 1.00000 | 3.54162e-11 | 1.00000 |
| PhcycC3H3_A+H  | 2.83111e-11 | 1.00000 | 2.83111e-11 | 1.00000 |
| PhCCH+CH3      | 1.33267e-11 | 1.00000 | 1.33267e-11 | 1.00000 |
| Ph+Allene      | 1.20275e-11 | 1.00000 | 1.20275e-11 | 1.00000 |
| rad5           | 1.05970e-11 | 1.00000 | 1.05970e-11 | 1.00000 |
| rad30          | 7.72334e-12 | 1.00000 | 7.72334e-12 | 1.00000 |
| PhCH2CCH+H     | 2.47560e-12 | 1.00000 | 2.47560e-12 | 1.00000 |
| rad25          | 1.53043e-12 | 1.00000 | 1.53043e-12 | 1.00000 |
| rad27          | 6.05547e-13 | 1.00000 | 6.05547e-13 | 1.00000 |
| Phenyl+cycC3H4 | 3.96860e-13 | 1.00000 | 0.00000     | 1.00000 |
| rad13          | 3.00582e-13 | 1.00000 | 3.00582e-13 | 1.00000 |
| PhcycC3H3_B+H  | 2.42861e-13 | 1.00000 | 2.42861e-13 | 1.00000 |
| rad14          | 5.14246e-14 | 1.00000 | 5.14246e-14 | 1.00000 |
| rad60syn       | 3.73907e-14 | 1.00000 | 3.73907e-14 | 1.00000 |
| rad37          | 2.84575e-14 | 1.00000 | 2.84575e-14 | 1.00000 |
| rad28          | 2.32783e-14 | 1.00000 | 2.32783e-14 | 1.00000 |
| PAH3+H         | 1.93072e-14 | 1.00000 | 1.93072e-14 | 1.00000 |
| rad60anti      | 1.85255e-14 | 1.00000 | 1.85255e-14 | 1.00000 |
| PAH7+H         | 6.59668e-15 | 1.00000 | 6.59668e-15 | 1.00000 |
| rad59          | 3.81614e-15 | 1.00000 | 3.81614e-15 | 1.00000 |
| rad24          | 1.25621e-15 | 1.00000 | 1.25621e-15 | 1.00000 |
| rad38          | 8.20547e-16 | 1.00000 | 8.20547e-16 | 1.00000 |
| rad33          | 5.71605e-16 | 1.00000 | 5.71605e-16 | 1.00000 |
| PAH9+H         | 1.64551e-16 | 1.00000 | 1.64551e-16 | 1.00000 |
| PAH10+CH3      | 8.98962e-17 | 1.00000 | 8.98962e-17 | 1.00000 |
| rad46          | 4.92713e-17 | 1.00000 | 4.92713e-17 | 1.00000 |
| rad43          | 1.16638e-17 | 1.00000 | 1.16638e-17 | 1.00000 |
| rad70          | 1.23617e-18 | 1.00000 | 1.23617e-18 | 1.00000 |
| rad31          | 1.07066e-18 | 1.00000 | 1.07066e-18 | 1.00000 |
| rad58          | 8.87513e-19 | 1.00000 | 8.87513e-19 | 1.00000 |
| rad39          | 4.79984e-19 | 1.00000 | 4.79984e-19 | 1.00000 |
| rad50          | 4.67194e-19 | 1.00000 | 4.67194e-19 | 1.00000 |
| rad62          | 3.00123e-19 | 1.00000 | 3.00123e-19 | 1.00000 |
| rad34          | 3.39228e-20 | 1.00000 | 3.39228e-20 | 1.00000 |
| PAH1+H         | 2.56285e-20 | 1.00000 | 2.56285e-20 | 1.00000 |
| rad54          | 1.95812e-20 | 1.00000 | 1.95812e-20 | 1.00000 |
| rad52          | 4.45731e-21 | 1.00000 | 4.45731e-21 | 1.00000 |
| rad41          | 3.28758e-21 | 1.00000 | 3.28758e-21 | 1.00000 |
| rad51          | 1.90055e-21 | 1.00000 | 1.90055e-21 | 1.00000 |
| rad55          | 2.73043e-22 | 1.00000 | 2.73043e-22 | 1.00000 |
| rad42          | 2.68282e-22 | 1.00000 | 2.68282e-22 | 1.00000 |
| rad65          | 4.41221e-24 | 1.00000 | 4.41221e-24 | 1.00000 |
| rad61          | 1.16708e-24 | 1.00000 | 1.16708e-24 | 1.00000 |
| rad47          | 5.10166e-25 | 1.00000 | 5.10166e-25 | 1.00000 |
| rad68syn       | 1.17007e-25 | 1.00000 | 1.17007e-25 | 1.00000 |
| rad53          | 9.63608e-26 | 1.00000 | 9.63608e-26 | 1.00000 |
| rad68anti      | 8.77188e-26 | 1.00000 | 8.77188e-26 | 1.00000 |
| rad40syn       | 1.24416e-27 | 1.00000 | 1.24416e-27 | 1.00000 |
| rad40anti      | 9.68113e-28 | 1.00000 | 9.68113e-28 | 1.00000 |
| rad56          | 9.56681e-28 | 1.00000 | 9.56681e-28 | 1.00000 |
| rad19syn       | 3.61696e-28 | 1.00000 | 3.61696e-28 | 1.00000 |
| rad64          | 2.47113e-28 | 1.00000 | 2.47113e-28 | 1.00000 |
| PAH8+H         | 2.45731e-28 | 1.00000 | 2.45731e-28 | 1.00000 |
| rad73          | 5.66592e-30 | 1.00000 | 5.66592e-30 | 1.00000 |
| rad71          | 5.29981e-32 | 1.00000 | 5.29981e-32 | 1.00000 |
| rad8           | 1.00049e-32 | 1.00000 | 1.00049e-32 | 1.00000 |

100000.000 Pa, 230.000000 K

=====

| Rate constant             | True (fraction)        | Effective (fraction)   |
|---------------------------|------------------------|------------------------|
| Total                     | 2.20761e-14 (1.00 )    | 2.20761e-14 (1.00 )    |
| Formation of rad19        | 2.20710e-14 (1.000 )   | 2.20710e-14 (1.000 )   |
| H-abstraction to cyc2enyl | 5.13155e-18 (0.000232) | 5.13155e-18 (0.000232) |
| H-abstraction to cyclenyl | 3.75316e-21 (1.70e-07) | 3.75316e-21 (1.70e-07) |

| species                       | PYtrue      | Cumul    | PYeffective | Cumul    |
|-------------------------------|-------------|----------|-------------|----------|
| rad9                          | 0.992721    | 0.992721 | 0.992721    | 0.992721 |
| Indene+H                      | 0.00354093  | 0.996262 | 0.00354093  | 0.996262 |
| rad15                         | 0.00350291  | 0.999765 | 0.00350291  | 0.999765 |
| Benzene+cycloprop-2-enylidene | 0.000232448 | 0.999997 | 0.000232448 | 0.999997 |
| rad19anti                     | 1.88355e-06 | 0.999999 | 1.88355e-06 | 0.999999 |
| PhCHCCH2+H                    | 8.41260e-07 | 1.00000  | 8.41260e-07 | 1.00000  |
| Benzene+cycloprop-1-enylidene | 1.70010e-07 | 1.00000  | 1.70010e-07 | 1.00000  |
| rad12                         | 7.53561e-08 | 1.00000  | 7.53561e-08 | 1.00000  |
| rad2                          | 3.46899e-08 | 1.00000  | 3.46899e-08 | 1.00000  |

|                |             |         |             |         |
|----------------|-------------|---------|-------------|---------|
| rad11          | 2.98131e-08 | 1.00000 | 2.98131e-08 | 1.00000 |
| rad6           | 1.38736e-08 | 1.00000 | 1.38736e-08 | 1.00000 |
| rad22          | 6.71805e-09 | 1.00000 | 6.71805e-09 | 1.00000 |
| rad26          | 5.24110e-09 | 1.00000 | 5.24110e-09 | 1.00000 |
| rad18          | 3.57547e-09 | 1.00000 | 3.57547e-09 | 1.00000 |
| rad1           | 2.59510e-09 | 1.00000 | 2.59510e-09 | 1.00000 |
| C2H2+PhCH2     | 2.28145e-09 | 1.00000 | 2.28145e-09 | 1.00000 |
| rad67          | 1.54430e-09 | 1.00000 | 1.54430e-09 | 1.00000 |
| rad45          | 1.32995e-09 | 1.00000 | 1.32995e-09 | 1.00000 |
| rad35          | 6.71387e-10 | 1.00000 | 6.71387e-10 | 1.00000 |
| rad23          | 5.58654e-10 | 1.00000 | 5.58654e-10 | 1.00000 |
| rad10          | 5.24709e-10 | 1.00000 | 5.24709e-10 | 1.00000 |
| rad20          | 2.45404e-10 | 1.00000 | 2.45404e-10 | 1.00000 |
| rad21          | 1.72437e-10 | 1.00000 | 1.72437e-10 | 1.00000 |
| rad7           | 1.50207e-10 | 1.00000 | 1.50207e-10 | 1.00000 |
| rad3           | 1.31819e-10 | 1.00000 | 1.31819e-10 | 1.00000 |
| rad36          | 8.51007e-11 | 1.00000 | 8.51007e-11 | 1.00000 |
| rad4           | 7.02581e-11 | 1.00000 | 7.02581e-11 | 1.00000 |
| PhCCCH3+H      | 6.38745e-11 | 1.00000 | 6.38745e-11 | 1.00000 |
| Ph+MeAc        | 4.91004e-11 | 1.00000 | 4.91004e-11 | 1.00000 |
| PhcycC3H3_A+H  | 3.81300e-11 | 1.00000 | 3.81300e-11 | 1.00000 |
| PhCCH+CH3      | 1.99476e-11 | 1.00000 | 1.99476e-11 | 1.00000 |
| Ph+Allene      | 1.61852e-11 | 1.00000 | 1.61852e-11 | 1.00000 |
| rad5           | 1.30198e-11 | 1.00000 | 1.30198e-11 | 1.00000 |
| rad30          | 9.45780e-12 | 1.00000 | 9.45780e-12 | 1.00000 |
| PhCH2CCH+H     | 3.43200e-12 | 1.00000 | 3.43200e-12 | 1.00000 |
| rad25          | 1.72233e-12 | 1.00000 | 1.72233e-12 | 1.00000 |
| rad27          | 6.94995e-13 | 1.00000 | 6.94995e-13 | 1.00000 |
| Phenyl+cycC3H4 | 5.81708e-13 | 1.00000 | 0.00000     | 1.00000 |
| PhcycC3H3_B+H  | 4.04082e-13 | 1.00000 | 4.04082e-13 | 1.00000 |
| rad13          | 3.65215e-13 | 1.00000 | 3.65215e-13 | 1.00000 |
| rad14          | 6.86947e-14 | 1.00000 | 6.86947e-14 | 1.00000 |
| rad60syn       | 4.78939e-14 | 1.00000 | 4.78939e-14 | 1.00000 |
| rad37          | 3.96737e-14 | 1.00000 | 3.96737e-14 | 1.00000 |
| rad28          | 3.36017e-14 | 1.00000 | 3.36017e-14 | 1.00000 |
| PAH3+H         | 2.60923e-14 | 1.00000 | 2.60923e-14 | 1.00000 |
| rad60anti      | 2.38219e-14 | 1.00000 | 2.38219e-14 | 1.00000 |
| PAH7+H         | 9.42454e-15 | 1.00000 | 9.42454e-15 | 1.00000 |
| rad59          | 5.11379e-15 | 1.00000 | 5.11379e-15 | 1.00000 |
| rad24          | 1.23155e-15 | 1.00000 | 1.23155e-15 | 1.00000 |
| rad38          | 1.18230e-15 | 1.00000 | 1.18230e-15 | 1.00000 |
| rad33          | 6.85794e-16 | 1.00000 | 6.85794e-16 | 1.00000 |
| PAH9+H         | 2.60109e-16 | 1.00000 | 2.60109e-16 | 1.00000 |
| PAH10+CH3      | 1.44691e-16 | 1.00000 | 1.44691e-16 | 1.00000 |
| rad46          | 7.24039e-17 | 1.00000 | 7.24039e-17 | 1.00000 |
| rad43          | 1.92049e-17 | 1.00000 | 1.92049e-17 | 1.00000 |
| rad70          | 2.09177e-18 | 1.00000 | 2.09177e-18 | 1.00000 |
| rad58          | 1.40297e-18 | 1.00000 | 1.40297e-18 | 1.00000 |
| rad31          | 1.32804e-18 | 1.00000 | 1.32804e-18 | 1.00000 |
| rad39          | 8.78323e-19 | 1.00000 | 8.78323e-19 | 1.00000 |
| rad50          | 7.53089e-19 | 1.00000 | 7.53089e-19 | 1.00000 |
| rad62          | 5.85883e-19 | 1.00000 | 5.85883e-19 | 1.00000 |
| rad34          | 6.20722e-20 | 1.00000 | 6.20722e-20 | 1.00000 |
| PAH1+H         | 4.81489e-20 | 1.00000 | 4.81489e-20 | 1.00000 |
| rad54          | 3.57191e-20 | 1.00000 | 3.57191e-20 | 1.00000 |
| rad52          | 7.64177e-21 | 1.00000 | 7.64177e-21 | 1.00000 |
| rad41          | 6.68662e-21 | 1.00000 | 6.68662e-21 | 1.00000 |
| rad51          | 3.47484e-21 | 1.00000 | 3.47484e-21 | 1.00000 |
| rad42          | 6.21859e-22 | 1.00000 | 6.21859e-22 | 1.00000 |
| rad55          | 5.33920e-22 | 1.00000 | 5.33920e-22 | 1.00000 |
| rad65          | 9.31239e-24 | 1.00000 | 9.31239e-24 | 1.00000 |
| rad61          | 3.31920e-24 | 1.00000 | 3.31920e-24 | 1.00000 |
| rad47          | 6.91734e-25 | 1.00000 | 6.91734e-25 | 1.00000 |
| rad68syn       | 3.56434e-25 | 1.00000 | 3.56434e-25 | 1.00000 |
| rad68anti      | 2.65479e-25 | 1.00000 | 2.65479e-25 | 1.00000 |
| rad53          | 2.53387e-25 | 1.00000 | 2.53387e-25 | 1.00000 |
| rad40syn       | 4.90246e-27 | 1.00000 | 4.90246e-27 | 1.00000 |
| rad40anti      | 3.82816e-27 | 1.00000 | 3.82816e-27 | 1.00000 |
| rad56          | 3.22841e-27 | 1.00000 | 3.22841e-27 | 1.00000 |
| rad19syn       | 1.32679e-27 | 1.00000 | 1.32679e-27 | 1.00000 |
| PAH8+H         | 1.10124e-27 | 1.00000 | 1.10124e-27 | 1.00000 |
| rad64          | 7.99952e-28 | 1.00000 | 7.99952e-28 | 1.00000 |
| rad73          | 2.28190e-29 | 1.00000 | 2.28190e-29 | 1.00000 |
| rad71          | 2.58245e-31 | 1.00000 | 2.58245e-31 | 1.00000 |
| rad8           | 7.98905e-33 | 1.00000 | 7.98905e-33 | 1.00000 |

100000.000 Pa, 240.000000 K

=====

Rate constant | True (fraction) Effective (fraction)

-----

|                           |                        |                        |
|---------------------------|------------------------|------------------------|
| Total                     | 2.45462e-14 (1.00 )    | 2.45462e-14 (1.00 )    |
| Formation of rad19        | 2.45383e-14 (1.000 )   | 2.45383e-14 (1.000 )   |
| H-abstraction to cyc2enyl | 7.92234e-18 (0.000323) | 7.92234e-18 (0.000323) |
| H-abstraction to cyclenyl | 7.97958e-21 (3.25e-07) | 7.97958e-21 (3.25e-07) |

| species                       | PYtrue      | Cumul    | PYeffective | Cumul    |
|-------------------------------|-------------|----------|-------------|----------|
| rad9                          | 0.992339    | 0.992339 | 0.992339    | 0.992339 |
| Indene+H                      | 0.00385289  | 0.996192 | 0.00385289  | 0.996192 |
| rad15                         | 0.00348187  | 0.999674 | 0.00348187  | 0.999674 |
| Benzene+cycloprop-2-enylidene | 0.000322752 | 0.999997 | 0.000322752 | 0.999997 |
| rad19anti                     | 1.80149e-06 | 0.999999 | 1.80149e-06 | 0.999999 |
| PhCHCCH2+H                    | 9.67327e-07 | 1.000000 | 9.67327e-07 | 1.000000 |
| Benzene+cycloprop-1-enylidene | 3.25084e-07 | 1.000000 | 3.25084e-07 | 1.000000 |
| rad12                         | 7.36977e-08 | 1.000000 | 7.36977e-08 | 1.000000 |
| rad2                          | 4.00645e-08 | 1.000000 | 4.00645e-08 | 1.000000 |
| rad11                         | 3.32199e-08 | 1.000000 | 3.32199e-08 | 1.000000 |
| rad6                          | 1.71145e-08 | 1.000000 | 1.71145e-08 | 1.000000 |
| rad22                         | 7.67521e-09 | 1.000000 | 7.67521e-09 | 1.000000 |
| rad26                         | 6.05743e-09 | 1.000000 | 6.05743e-09 | 1.000000 |
| rad18                         | 3.53672e-09 | 1.000000 | 3.53672e-09 | 1.000000 |
| rad1                          | 3.02185e-09 | 1.000000 | 3.02185e-09 | 1.000000 |
| C2H2+PhCH2                    | 2.80968e-09 | 1.000000 | 2.80968e-09 | 1.000000 |
| rad67                         | 1.86012e-09 | 1.000000 | 1.86012e-09 | 1.000000 |
| rad45                         | 1.57045e-09 | 1.000000 | 1.57045e-09 | 1.000000 |
| rad35                         | 8.05483e-10 | 1.000000 | 8.05483e-10 | 1.000000 |
| rad23                         | 7.16676e-10 | 1.000000 | 7.16676e-10 | 1.000000 |
| rad10                         | 6.72200e-10 | 1.000000 | 6.72200e-10 | 1.000000 |
| rad20                         | 2.47933e-10 | 1.000000 | 2.47933e-10 | 1.000000 |
| rad21                         | 1.74446e-10 | 1.000000 | 1.74446e-10 | 1.000000 |
| rad3                          | 1.66344e-10 | 1.000000 | 1.66344e-10 | 1.000000 |
| rad7                          | 1.60008e-10 | 1.000000 | 1.60008e-10 | 1.000000 |
| rad36                         | 1.00901e-10 | 1.000000 | 1.00901e-10 | 1.000000 |
| rad4                          | 8.88446e-11 | 1.000000 | 8.88446e-11 | 1.000000 |
| PhCCCH3+H                     | 8.70489e-11 | 1.000000 | 8.70489e-11 | 1.000000 |
| Ph+MeAc                       | 6.86284e-11 | 1.000000 | 6.86284e-11 | 1.000000 |
| PhcycC3H3_A+H                 | 5.14130e-11 | 1.000000 | 5.14130e-11 | 1.000000 |
| PhCCH+CH3                     | 3.00049e-11 | 1.000000 | 3.00049e-11 | 1.000000 |
| Ph+Allene                     | 2.18939e-11 | 1.000000 | 2.18939e-11 | 1.000000 |
| rad5                          | 1.60613e-11 | 1.000000 | 1.60613e-11 | 1.000000 |
| rad30                         | 1.15954e-11 | 1.000000 | 1.15954e-11 | 1.000000 |
| PhCH2CCH+H                    | 4.78664e-12 | 1.000000 | 4.78664e-12 | 1.000000 |
| rad25                         | 1.93470e-12 | 1.000000 | 1.93470e-12 | 1.000000 |
| Phenyl+cycC3H4                | 8.50395e-13 | 1.000000 | 0.000000    | 1.000000 |
| rad27                         | 7.98929e-13 | 1.000000 | 7.98929e-13 | 1.000000 |
| PhcycC3H3_B+H                 | 6.62056e-13 | 1.000000 | 6.62056e-13 | 1.000000 |
| rad13                         | 4.44833e-13 | 1.000000 | 4.44833e-13 | 1.000000 |
| rad14                         | 9.15255e-14 | 1.000000 | 9.15255e-14 | 1.000000 |
| rad60syn                      | 6.14958e-14 | 1.000000 | 6.14958e-14 | 1.000000 |
| rad37                         | 5.57632e-14 | 1.000000 | 5.57632e-14 | 1.000000 |
| rad28                         | 4.88705e-14 | 1.000000 | 4.88705e-14 | 1.000000 |
| PAH3+H                        | 3.53913e-14 | 1.000000 | 3.53913e-14 | 1.000000 |
| rad60anti                     | 3.07094e-14 | 1.000000 | 3.07094e-14 | 1.000000 |
| PAH7+H                        | 1.35161e-14 | 1.000000 | 1.35161e-14 | 1.000000 |
| rad59                         | 6.87584e-15 | 1.000000 | 6.87584e-15 | 1.000000 |
| rad38                         | 1.71463e-15 | 1.000000 | 1.71463e-15 | 1.000000 |
| rad24                         | 1.21568e-15 | 1.000000 | 1.21568e-15 | 1.000000 |
| rad33                         | 8.25411e-16 | 1.000000 | 8.25411e-16 | 1.000000 |
| PAH9+H                        | 4.13269e-16 | 1.000000 | 4.13269e-16 | 1.000000 |
| PAH10+CH3                     | 2.35233e-16 | 1.000000 | 2.35233e-16 | 1.000000 |
| rad46                         | 1.07077e-16 | 1.000000 | 1.07077e-16 | 1.000000 |
| rad43                         | 3.18518e-17 | 1.000000 | 3.18518e-17 | 1.000000 |
| rad70                         | 3.54656e-18 | 1.000000 | 3.54656e-18 | 1.000000 |
| rad58                         | 2.22274e-18 | 1.000000 | 2.22274e-18 | 1.000000 |
| rad31                         | 1.66475e-18 | 1.000000 | 1.66475e-18 | 1.000000 |
| rad39                         | 1.62753e-18 | 1.000000 | 1.62753e-18 | 1.000000 |
| rad50                         | 1.22443e-18 | 1.000000 | 1.22443e-18 | 1.000000 |
| rad62                         | 1.14087e-18 | 1.000000 | 1.14087e-18 | 1.000000 |
| rad34                         | 1.13401e-19 | 1.000000 | 1.13401e-19 | 1.000000 |
| PAH1+H                        | 9.09922e-20 | 1.000000 | 9.09922e-20 | 1.000000 |
| rad54                         | 6.56795e-20 | 1.000000 | 6.56795e-20 | 1.000000 |
| rad41                         | 1.35679e-20 | 1.000000 | 1.35679e-20 | 1.000000 |
| rad52                         | 1.32161e-20 | 1.000000 | 1.32161e-20 | 1.000000 |
| rad51                         | 6.40277e-21 | 1.000000 | 6.40277e-21 | 1.000000 |
| rad42                         | 1.42212e-21 | 1.000000 | 1.42212e-21 | 1.000000 |
| rad55                         | 1.04932e-21 | 1.000000 | 1.04932e-21 | 1.000000 |
| rad65                         | 1.97036e-23 | 1.000000 | 1.97036e-23 | 1.000000 |
| rad61                         | 9.07172e-24 | 1.000000 | 9.07172e-24 | 1.000000 |
| rad68syn                      | 1.02779e-24 | 1.000000 | 1.02779e-24 | 1.000000 |
| rad47                         | 9.42340e-25 | 1.000000 | 9.42340e-25 | 1.000000 |

|           |             |         |             |         |
|-----------|-------------|---------|-------------|---------|
| rad68anti | 7.61048e-25 | 1.00000 | 7.61048e-25 | 1.00000 |
| rad53     | 6.52593e-25 | 1.00000 | 6.52593e-25 | 1.00000 |
| rad40syn  | 1.77128e-26 | 1.00000 | 1.77128e-26 | 1.00000 |
| rad40anti | 1.38899e-26 | 1.00000 | 1.38899e-26 | 1.00000 |
| rad56     | 1.02964e-26 | 1.00000 | 1.02964e-26 | 1.00000 |
| rad19syn  | 5.10125e-27 | 1.00000 | 5.10125e-27 | 1.00000 |
| PAH8+H    | 4.42349e-27 | 1.00000 | 4.42349e-27 | 1.00000 |
| rad64     | 2.49601e-27 | 1.00000 | 2.49601e-27 | 1.00000 |
| rad73     | 8.46842e-29 | 1.00000 | 8.46842e-29 | 1.00000 |
| rad71     | 1.12008e-30 | 1.00000 | 1.12008e-30 | 1.00000 |
| rad8      | 6.90232e-33 | 1.00000 | 6.90232e-33 | 1.00000 |

100000.000 Pa, 250.000000 K

| Rate constant             | True (fraction)        | Effective (fraction)   |
|---------------------------|------------------------|------------------------|
| Total                     | 2.71048e-14 (1.00 )    | 2.71048e-14 (1.00 )    |
| Formation of rad19        | 2.70930e-14 (1.000 )   | 2.70930e-14 (1.000 )   |
| H-abstraction to cyc2enyl | 1.17991e-17 (0.000435) | 1.17991e-17 (0.000435) |
| H-abstraction to cyclenyl | 1.59554e-20 (5.89e-07) | 1.59554e-20 (5.89e-07) |

| species                       | PYtrue      | Cumul    | PYeffective | Cumul    |
|-------------------------------|-------------|----------|-------------|----------|
| rad9                          | 0.991910    | 0.991910 | 0.991910    | 0.991910 |
| Indene+H                      | 0.00418961  | 0.996100 | 0.00418961  | 0.996100 |
| rad15                         | 0.00346096  | 0.999561 | 0.00346096  | 0.999561 |
| Benzene+cycloprop-2-enylidene | 0.000435312 | 0.999996 | 0.000435312 | 0.999996 |
| rad19anti                     | 1.78004e-06 | 0.999998 | 1.78004e-06 | 0.999998 |
| PhCHCCH2+H                    | 1.11546e-06 | 0.999999 | 1.11546e-06 | 0.999999 |
| Benzene+cycloprop-1-enylidene | 5.88656e-07 | 1.000000 | 5.88656e-07 | 1.000000 |
| rad12                         | 7.22210e-08 | 1.000000 | 7.22210e-08 | 1.000000 |
| rad2                          | 4.63904e-08 | 1.000000 | 4.63904e-08 | 1.000000 |
| rad11                         | 3.70048e-08 | 1.000000 | 3.70048e-08 | 1.000000 |
| rad6                          | 2.11485e-08 | 1.000000 | 2.11485e-08 | 1.000000 |
| rad22                         | 8.75054e-09 | 1.000000 | 8.75054e-09 | 1.000000 |
| rad26                         | 7.02143e-09 | 1.000000 | 7.02143e-09 | 1.000000 |
| rad1                          | 3.53142e-09 | 1.000000 | 3.53142e-09 | 1.000000 |
| rad18                         | 3.49256e-09 | 1.000000 | 3.49256e-09 | 1.000000 |
| C2H2+PhCH2                    | 3.46492e-09 | 1.000000 | 3.46492e-09 | 1.000000 |
| rad67                         | 2.24616e-09 | 1.000000 | 2.24616e-09 | 1.000000 |
| rad45                         | 1.85553e-09 | 1.000000 | 1.85553e-09 | 1.000000 |
| rad35                         | 9.68703e-10 | 1.000000 | 9.68703e-10 | 1.000000 |
| rad23                         | 9.19151e-10 | 1.000000 | 9.19151e-10 | 1.000000 |
| rad10                         | 8.64352e-10 | 1.000000 | 8.64352e-10 | 1.000000 |
| rad20                         | 2.50411e-10 | 1.000000 | 2.50411e-10 | 1.000000 |
| rad3                          | 2.10080e-10 | 1.000000 | 2.10080e-10 | 1.000000 |
| rad21                         | 1.76439e-10 | 1.000000 | 1.76439e-10 | 1.000000 |
| rad7                          | 1.70899e-10 | 1.000000 | 1.70899e-10 | 1.000000 |
| rad36                         | 1.19779e-10 | 1.000000 | 1.19779e-10 | 1.000000 |
| PhCCCH3+H                     | 1.19486e-10 | 1.000000 | 1.19486e-10 | 1.000000 |
| rad4                          | 1.12474e-10 | 1.000000 | 1.12474e-10 | 1.000000 |
| Ph+MeAc                       | 9.66916e-11 | 1.000000 | 9.66916e-11 | 1.000000 |
| PhcycC3H3_A+H                 | 6.93559e-11 | 1.000000 | 6.93559e-11 | 1.000000 |
| PhCCH+CH3                     | 4.53145e-11 | 1.000000 | 4.53145e-11 | 1.000000 |
| Ph+Allene                     | 2.97615e-11 | 1.000000 | 2.97615e-11 | 1.000000 |
| rad5                          | 1.98845e-11 | 1.000000 | 1.98845e-11 | 1.000000 |
| rad30                         | 1.42371e-11 | 1.000000 | 1.42371e-11 | 1.000000 |
| PhCH2CCH+H                    | 6.71307e-12 | 1.000000 | 6.71307e-12 | 1.000000 |
| rad25                         | 2.16930e-12 | 1.000000 | 2.16930e-12 | 1.000000 |
| Phenyl+cycC3H4                | 1.23934e-12 | 1.000000 | 0.000000    | 1.000000 |
| PhcycC3H3_B+H                 | 1.06946e-12 | 1.000000 | 1.06946e-12 | 1.000000 |
| rad27                         | 9.20071e-13 | 1.000000 | 9.20071e-13 | 1.000000 |
| rad13                         | 5.43090e-13 | 1.000000 | 5.43090e-13 | 1.000000 |
| rad14                         | 1.21569e-13 | 1.000000 | 1.21569e-13 | 1.000000 |
| rad60syn                      | 7.91652e-14 | 1.000000 | 7.91652e-14 | 1.000000 |
| rad37                         | 7.90039e-14 | 1.000000 | 7.90039e-14 | 1.000000 |
| rad28                         | 7.15813e-14 | 1.000000 | 7.15813e-14 | 1.000000 |
| PAH3+H                        | 4.81766e-14 | 1.000000 | 4.81766e-14 | 1.000000 |
| rad60anti                     | 3.96940e-14 | 1.000000 | 3.96940e-14 | 1.000000 |
| PAH7+H                        | 1.94503e-14 | 1.000000 | 1.94503e-14 | 1.000000 |
| rad59                         | 9.27588e-15 | 1.000000 | 9.27588e-15 | 1.000000 |
| rad38                         | 2.50303e-15 | 1.000000 | 2.50303e-15 | 1.000000 |
| rad24                         | 1.20919e-15 | 1.000000 | 1.20919e-15 | 1.000000 |
| rad33                         | 9.96545e-16 | 1.000000 | 9.96545e-16 | 1.000000 |
| PAH9+H                        | 6.59797e-16 | 1.000000 | 6.59797e-16 | 1.000000 |
| PAH10+CH3                     | 3.85759e-16 | 1.000000 | 3.85759e-16 | 1.000000 |
| rad46                         | 1.59370e-16 | 1.000000 | 1.59370e-16 | 1.000000 |
| rad43                         | 5.31520e-17 | 1.000000 | 5.31520e-17 | 1.000000 |
| rad70                         | 6.01621e-18 | 1.000000 | 6.01621e-18 | 1.000000 |
| rad58                         | 3.52616e-18 | 1.000000 | 3.52616e-18 | 1.000000 |

|           |             |         |             |         |
|-----------|-------------|---------|-------------|---------|
| rad39     | 3.04627e-18 | 1.00000 | 3.04627e-18 | 1.00000 |
| rad62     | 2.21094e-18 | 1.00000 | 2.21094e-18 | 1.00000 |
| rad31     | 2.11041e-18 | 1.00000 | 2.11041e-18 | 1.00000 |
| rad50     | 2.00670e-18 | 1.00000 | 2.00670e-18 | 1.00000 |
| rad34     | 2.06508e-19 | 1.00000 | 2.06508e-19 | 1.00000 |
| PAH1+H    | 1.72561e-19 | 1.00000 | 1.72561e-19 | 1.00000 |
| rad54     | 1.21449e-19 | 1.00000 | 1.21449e-19 | 1.00000 |
| rad41     | 2.74150e-20 | 1.00000 | 2.74150e-20 | 1.00000 |
| rad52     | 2.30298e-20 | 1.00000 | 2.30298e-20 | 1.00000 |
| rad51     | 1.18696e-20 | 1.00000 | 1.18696e-20 | 1.00000 |
| rad42     | 3.20077e-21 | 1.00000 | 3.20077e-21 | 1.00000 |
| rad55     | 2.06652e-21 | 1.00000 | 2.06652e-21 | 1.00000 |
| rad65     | 4.16645e-23 | 1.00000 | 4.16645e-23 | 1.00000 |
| rad61     | 2.38275e-23 | 1.00000 | 2.38275e-23 | 1.00000 |
| rad68syn  | 2.81126e-24 | 1.00000 | 2.81126e-24 | 1.00000 |
| rad68anti | 2.07097e-24 | 1.00000 | 2.07097e-24 | 1.00000 |
| rad53     | 1.64060e-24 | 1.00000 | 1.64060e-24 | 1.00000 |
| rad47     | 1.29156e-24 | 1.00000 | 1.29156e-24 | 1.00000 |
| rad40syn  | 5.89925e-26 | 1.00000 | 5.89925e-26 | 1.00000 |
| rad40anti | 4.64828e-26 | 1.00000 | 4.64828e-26 | 1.00000 |
| rad56     | 3.10185e-26 | 1.00000 | 3.10185e-26 | 1.00000 |
| rad19syn  | 2.05050e-26 | 1.00000 | 2.05050e-26 | 1.00000 |
| PAH8+H    | 1.60697e-26 | 1.00000 | 1.60697e-26 | 1.00000 |
| rad64     | 7.46608e-27 | 1.00000 | 7.46608e-27 | 1.00000 |
| rad73     | 2.90699e-28 | 1.00000 | 2.90699e-28 | 1.00000 |
| rad71     | 4.36893e-30 | 1.00000 | 4.36893e-30 | 1.00000 |
| rad8      | 6.54277e-33 | 1.00000 | 6.54277e-33 | 1.00000 |

100000.000 Pa, 260.000000 K

| Rate constant             | True (fraction)        | Effective (fraction)   |
|---------------------------|------------------------|------------------------|
| Total                     | 2.97464e-14 (1.00 )    | 2.97464e-14 (1.00 )    |
| Formation of rad19        | 2.97293e-14 (0.999 )   | 2.97293e-14 (0.999 )   |
| H-abstraction to cyc2enyl | 1.70236e-17 (0.000572) | 1.70236e-17 (0.000572) |
| H-abstraction to cyclenyl | 3.02186e-20 (1.02e-06) | 3.02186e-20 (1.02e-06) |

| species                       | PYtrue      | Cumul    | PYeffective | Cumul    |
|-------------------------------|-------------|----------|-------------|----------|
| rad9                          | 0.991429    | 0.991429 | 0.991429    | 0.991429 |
| Indene+H                      | 0.00455385  | 0.995983 | 0.00455385  | 0.995983 |
| rad15                         | 0.00344026  | 0.999423 | 0.00344026  | 0.999423 |
| Benzene+cycloprop-2-enylidene | 0.000572291 | 0.999996 | 0.000572291 | 0.999996 |
| rad19anti                     | 1.81522e-06 | 0.999997 | 1.81522e-06 | 0.999997 |
| PhCHCCH2+H                    | 1.29012e-06 | 0.999999 | 1.29012e-06 | 0.999999 |
| Benzene+cycloprop-1-enylidene | 1.01588e-06 | 1.000000 | 1.01588e-06 | 1.000000 |
| rad12                         | 7.09101e-08 | 1.000000 | 7.09101e-08 | 1.000000 |
| rad2                          | 5.38537e-08 | 1.000000 | 5.38537e-08 | 1.000000 |
| rad11                         | 4.12018e-08 | 1.000000 | 4.12018e-08 | 1.000000 |
| rad6                          | 2.61767e-08 | 1.000000 | 2.61767e-08 | 1.000000 |
| rad22                         | 9.95663e-09 | 1.000000 | 9.95663e-09 | 1.000000 |
| rad26                         | 8.16351e-09 | 1.000000 | 8.16351e-09 | 1.000000 |
| C2H2+PhCH2                    | 4.27980e-09 | 1.000000 | 4.27980e-09 | 1.000000 |
| rad1                          | 4.14194e-09 | 1.000000 | 4.14194e-09 | 1.000000 |
| rad18                         | 3.44413e-09 | 1.000000 | 3.44413e-09 | 1.000000 |
| rad67                         | 2.71942e-09 | 1.000000 | 2.71942e-09 | 1.000000 |
| rad45                         | 2.19421e-09 | 1.000000 | 2.19421e-09 | 1.000000 |
| rad23                         | 1.17867e-09 | 1.000000 | 1.17867e-09 | 1.000000 |
| rad35                         | 1.16796e-09 | 1.000000 | 1.16796e-09 | 1.000000 |
| rad10                         | 1.11540e-09 | 1.000000 | 1.11540e-09 | 1.000000 |
| rad3                          | 2.65416e-10 | 1.000000 | 2.65416e-10 | 1.000000 |
| rad20                         | 2.52952e-10 | 1.000000 | 2.52952e-10 | 1.000000 |
| rad7                          | 1.83092e-10 | 1.000000 | 1.83092e-10 | 1.000000 |
| rad21                         | 1.78499e-10 | 1.000000 | 1.78499e-10 | 1.000000 |
| PhCCCH3+H                     | 1.65157e-10 | 1.000000 | 1.65157e-10 | 1.000000 |
| rad4                          | 1.42489e-10 | 1.000000 | 1.42489e-10 | 1.000000 |
| rad36                         | 1.42396e-10 | 1.000000 | 1.42396e-10 | 1.000000 |
| Ph+MeAc                       | 1.37271e-10 | 1.000000 | 1.37271e-10 | 1.000000 |
| PhcycC3H3_A+H                 | 9.35458e-11 | 1.000000 | 9.35458e-11 | 1.000000 |
| PhCCH+CH3                     | 6.86351e-11 | 1.000000 | 6.86351e-11 | 1.000000 |
| Ph+Allene                     | 4.06366e-11 | 1.000000 | 4.06366e-11 | 1.000000 |
| rad5                          | 2.46914e-11 | 1.000000 | 2.46914e-11 | 1.000000 |
| rad30                         | 1.75105e-11 | 1.000000 | 1.75105e-11 | 1.000000 |
| PhCH2CCH+H                    | 9.46098e-12 | 1.000000 | 9.46098e-12 | 1.000000 |
| rad25                         | 2.42782e-12 | 1.000000 | 2.42782e-12 | 1.000000 |
| Phenyl+cycC3H4                | 1.79976e-12 | 1.000000 | 0.000000    | 1.000000 |
| PhcycC3H3_B+H                 | 1.70479e-12 | 1.000000 | 1.70479e-12 | 1.000000 |
| rad27                         | 1.06164e-12 | 1.000000 | 1.06164e-12 | 1.000000 |
| rad13                         | 6.64494e-13 | 1.000000 | 6.64494e-13 | 1.000000 |
| rad14                         | 1.60894e-13 | 1.000000 | 1.60894e-13 | 1.000000 |

|           |             |         |             |         |
|-----------|-------------|---------|-------------|---------|
| rad37     | 1.12780e-13 | 1.00000 | 1.12780e-13 | 1.00000 |
| rad28     | 1.05512e-13 | 1.00000 | 1.05512e-13 | 1.00000 |
| rad60syn  | 1.02181e-13 | 1.00000 | 1.02181e-13 | 1.00000 |
| PAH3+H    | 6.58028e-14 | 1.00000 | 6.58028e-14 | 1.00000 |
| rad60anti | 5.14460e-14 | 1.00000 | 5.14460e-14 | 1.00000 |
| PAH7+H    | 2.80700e-14 | 1.00000 | 2.80700e-14 | 1.00000 |
| rad59     | 1.25534e-14 | 1.00000 | 1.25534e-14 | 1.00000 |
| rad38     | 3.67764e-15 | 1.00000 | 3.67764e-15 | 1.00000 |
| rad24     | 1.21284e-15 | 1.00000 | 1.21284e-15 | 1.00000 |
| rad33     | 1.20673e-15 | 1.00000 | 1.20673e-15 | 1.00000 |
| PAH9+H    | 1.05790e-15 | 1.00000 | 1.05790e-15 | 1.00000 |
| PAH10+CH3 | 6.37052e-16 | 1.00000 | 6.37052e-16 | 1.00000 |
| rad46     | 2.38667e-16 | 1.00000 | 2.38667e-16 | 1.00000 |
| rad43     | 8.91195e-17 | 1.00000 | 8.91195e-17 | 1.00000 |
| rad70     | 1.01948e-17 | 1.00000 | 1.01948e-17 | 1.00000 |
| rad39     | 5.74102e-18 | 1.00000 | 5.74102e-18 | 1.00000 |
| rad58     | 5.59578e-18 | 1.00000 | 5.59578e-18 | 1.00000 |
| rad62     | 4.25424e-18 | 1.00000 | 4.25424e-18 | 1.00000 |
| rad50     | 3.31192e-18 | 1.00000 | 3.31192e-18 | 1.00000 |
| rad31     | 2.70741e-18 | 1.00000 | 2.70741e-18 | 1.00000 |
| rad34     | 3.74164e-19 | 1.00000 | 3.74164e-19 | 1.00000 |
| PAH1+H    | 3.27464e-19 | 1.00000 | 3.27464e-19 | 1.00000 |
| rad54     | 2.25194e-19 | 1.00000 | 2.25194e-19 | 1.00000 |
| rad41     | 5.50354e-20 | 1.00000 | 5.50354e-20 | 1.00000 |
| rad52     | 4.03728e-20 | 1.00000 | 4.03728e-20 | 1.00000 |
| rad51     | 2.20909e-20 | 1.00000 | 2.20909e-20 | 1.00000 |
| rad42     | 7.07217e-21 | 1.00000 | 7.07217e-21 | 1.00000 |
| rad55     | 4.06424e-21 | 1.00000 | 4.06424e-21 | 1.00000 |
| rad65     | 8.77300e-23 | 1.00000 | 8.77300e-23 | 1.00000 |
| rad61     | 6.00976e-23 | 1.00000 | 6.00976e-23 | 1.00000 |
| rad68syn  | 7.30360e-24 | 1.00000 | 7.30360e-24 | 1.00000 |
| rad68anti | 5.35636e-24 | 1.00000 | 5.35636e-24 | 1.00000 |
| rad53     | 4.01071e-24 | 1.00000 | 4.01071e-24 | 1.00000 |
| rad47     | 1.78354e-24 | 1.00000 | 1.78354e-24 | 1.00000 |
| rad40syn  | 1.81990e-25 | 1.00000 | 1.81990e-25 | 1.00000 |
| rad40anti | 1.44150e-25 | 1.00000 | 1.44150e-25 | 1.00000 |
| rad56     | 8.82259e-26 | 1.00000 | 8.82259e-26 | 1.00000 |
| rad19syn  | 8.59045e-26 | 1.00000 | 8.59045e-26 | 1.00000 |
| PAH8+H    | 5.32335e-26 | 1.00000 | 5.32335e-26 | 1.00000 |
| rad64     | 2.13141e-26 | 1.00000 | 2.13141e-26 | 1.00000 |
| rad73     | 9.26524e-28 | 1.00000 | 9.26524e-28 | 1.00000 |
| rad71     | 1.54696e-29 | 1.00000 | 1.54696e-29 | 1.00000 |
| rad8      | 6.93152e-33 | 1.00000 | 6.93152e-33 | 1.00000 |

100000.000 Pa, 270.000000 K

=====

| Rate constant             | True (fraction)        | Effective (fraction)   |
|---------------------------|------------------------|------------------------|
| Total                     | 3.24655e-14 (1.00 )    | 3.24655e-14 (1.00 )    |
| Formation of rad19        | 3.24415e-14 (0.999 )   | 3.24415e-14 (0.999 )   |
| H-abstraction to cyc2enyl | 2.38790e-17 (0.000736) | 2.38790e-17 (0.000736) |
| H-abstraction to cyclenyl | 5.45397e-20 (1.68e-06) | 5.45397e-20 (1.68e-06) |

| species                       | PYtrue      | Cumul    | PYeffective | Cumul    |
|-------------------------------|-------------|----------|-------------|----------|
| rad9                          | 0.990891    | 0.990891 | 0.990891    | 0.990891 |
| Indene+H                      | 0.00494865  | 0.995840 | 0.00494865  | 0.995840 |
| rad15                         | 0.00341981  | 0.999259 | 0.00341981  | 0.999259 |
| Benzene+cycloprop-2-enylidene | 0.000735519 | 0.999995 | 0.000735519 | 0.999995 |
| rad19anti                     | 1.90825e-06 | 0.999997 | 1.90825e-06 | 0.999997 |
| Benzene+cycloprop-1-enylidene | 1.67993e-06 | 0.999999 | 1.67993e-06 | 0.999999 |
| PhCHCCH2+H                    | 1.49668e-06 | 1.00000  | 1.49668e-06 | 1.00000  |
| rad12                         | 6.97523e-08 | 1.00000  | 6.97523e-08 | 1.00000  |
| rad2                          | 6.26755e-08 | 1.00000  | 6.26755e-08 | 1.00000  |
| rad11                         | 4.58436e-08 | 1.00000  | 4.58436e-08 | 1.00000  |
| rad6                          | 3.24498e-08 | 1.00000  | 3.24498e-08 | 1.00000  |
| rad22                         | 1.13064e-08 | 1.00000  | 1.13064e-08 | 1.00000  |
| rad26                         | 9.52056e-09 | 1.00000  | 9.52056e-09 | 1.00000  |
| C2H2+PhCH2                    | 5.29563e-09 | 1.00000  | 5.29563e-09 | 1.00000  |
| rad1                          | 4.87561e-09 | 1.00000  | 4.87561e-09 | 1.00000  |
| rad18                         | 3.39251e-09 | 1.00000  | 3.39251e-09 | 1.00000  |
| rad67                         | 3.30110e-09 | 1.00000  | 3.30110e-09 | 1.00000  |
| rad45                         | 2.59729e-09 | 1.00000  | 2.59729e-09 | 1.00000  |
| rad23                         | 1.51134e-09 | 1.00000  | 1.51134e-09 | 1.00000  |
| rad10                         | 1.44409e-09 | 1.00000  | 1.44409e-09 | 1.00000  |
| rad35                         | 1.41185e-09 | 1.00000  | 1.41185e-09 | 1.00000  |
| rad3                          | 3.35281e-10 | 1.00000  | 3.35281e-10 | 1.00000  |
| rad20                         | 2.55660e-10 | 1.00000  | 2.55660e-10 | 1.00000  |
| PhCCCH3+H                     | 2.29793e-10 | 1.00000  | 2.29793e-10 | 1.00000  |
| rad7                          | 1.96872e-10 | 1.00000  | 1.96872e-10 | 1.00000  |

|                |             |         |             |         |
|----------------|-------------|---------|-------------|---------|
| Ph+MeAc        | 1.96254e-10 | 1.00000 | 1.96254e-10 | 1.00000 |
| rad21          | 1.80699e-10 | 1.00000 | 1.80699e-10 | 1.00000 |
| rad4           | 1.80552e-10 | 1.00000 | 1.80552e-10 | 1.00000 |
| rad36          | 1.69565e-10 | 1.00000 | 1.69565e-10 | 1.00000 |
| PhcycC3H3_A+H  | 1.26076e-10 | 1.00000 | 1.26076e-10 | 1.00000 |
| PhCCH+CH3      | 1.04131e-10 | 1.00000 | 1.04131e-10 | 1.00000 |
| Ph+Allene      | 5.56999e-11 | 1.00000 | 5.56999e-11 | 1.00000 |
| rad5           | 3.07314e-11 | 1.00000 | 3.07314e-11 | 1.00000 |
| rad30          | 2.15756e-11 | 1.00000 | 2.15756e-11 | 1.00000 |
| PhCH2CCH+H     | 1.33884e-11 | 1.00000 | 1.33884e-11 | 1.00000 |
| rad25          | 2.71184e-12 | 1.00000 | 2.71184e-12 | 1.00000 |
| PhcycC3H3_B+H  | 2.68337e-12 | 1.00000 | 2.68337e-12 | 1.00000 |
| Phenyl+cycC3H4 | 2.60297e-12 | 1.00000 | 0.00000     | 1.00000 |
| rad27          | 1.22745e-12 | 1.00000 | 1.22745e-12 | 1.00000 |
| rad13          | 8.14581e-13 | 1.00000 | 8.14581e-13 | 1.00000 |
| rad14          | 2.12055e-13 | 1.00000 | 2.12055e-13 | 1.00000 |
| rad37          | 1.62121e-13 | 1.00000 | 1.62121e-13 | 1.00000 |
| rad28          | 1.56366e-13 | 1.00000 | 1.56366e-13 | 1.00000 |
| rad60syn       | 1.32231e-13 | 1.00000 | 1.32231e-13 | 1.00000 |
| PAH3+H         | 9.01528e-14 | 1.00000 | 9.01528e-14 | 1.00000 |
| rad60anti      | 6.68537e-14 | 1.00000 | 6.68537e-14 | 1.00000 |
| PAH7+H         | 4.05971e-14 | 1.00000 | 4.05971e-14 | 1.00000 |
| rad59          | 1.70380e-14 | 1.00000 | 1.70380e-14 | 1.00000 |
| rad38          | 5.43661e-15 | 1.00000 | 5.43661e-15 | 1.00000 |
| PAH9+H         | 1.70203e-15 | 1.00000 | 1.70203e-15 | 1.00000 |
| rad33          | 1.46524e-15 | 1.00000 | 1.46524e-15 | 1.00000 |
| rad24          | 1.22755e-15 | 1.00000 | 1.22755e-15 | 1.00000 |
| PAH10+CH3      | 1.05726e-15 | 1.00000 | 1.05726e-15 | 1.00000 |
| rad46          | 3.59479e-16 | 1.00000 | 3.59479e-16 | 1.00000 |
| rad43          | 1.49882e-16 | 1.00000 | 1.49882e-16 | 1.00000 |
| rad70          | 1.72266e-17 | 1.00000 | 1.72266e-17 | 1.00000 |
| rad39          | 1.08522e-17 | 1.00000 | 1.08522e-17 | 1.00000 |
| rad58          | 8.87308e-18 | 1.00000 | 8.87308e-18 | 1.00000 |
| rad62          | 8.10868e-18 | 1.00000 | 8.10868e-18 | 1.00000 |
| rad50          | 5.49742e-18 | 1.00000 | 5.49742e-18 | 1.00000 |
| rad31          | 3.51702e-18 | 1.00000 | 3.51702e-18 | 1.00000 |
| rad34          | 6.73151e-19 | 1.00000 | 6.73151e-19 | 1.00000 |
| PAH1+H         | 6.19763e-19 | 1.00000 | 6.19763e-19 | 1.00000 |
| rad54          | 4.17319e-19 | 1.00000 | 4.17319e-19 | 1.00000 |
| rad41          | 1.09471e-19 | 1.00000 | 1.09471e-19 | 1.00000 |
| rad52          | 7.10644e-20 | 1.00000 | 7.10644e-20 | 1.00000 |
| rad51          | 4.11682e-20 | 1.00000 | 4.11682e-20 | 1.00000 |
| rad42          | 1.53014e-20 | 1.00000 | 1.53014e-20 | 1.00000 |
| rad55          | 7.95131e-21 | 1.00000 | 7.95131e-21 | 1.00000 |
| rad65          | 1.83201e-22 | 1.00000 | 1.83201e-22 | 1.00000 |
| rad61          | 1.45401e-22 | 1.00000 | 1.45401e-22 | 1.00000 |
| rad68syn       | 1.80393e-23 | 1.00000 | 1.80393e-23 | 1.00000 |
| rad68anti      | 1.31793e-23 | 1.00000 | 1.31793e-23 | 1.00000 |
| rad53          | 9.49919e-24 | 1.00000 | 9.49919e-24 | 1.00000 |
| rad47          | 2.48524e-24 | 1.00000 | 2.48524e-24 | 1.00000 |
| rad40syn       | 5.22440e-25 | 1.00000 | 5.22440e-25 | 1.00000 |
| rad40anti      | 4.16120e-25 | 1.00000 | 4.16120e-25 | 1.00000 |
| rad19syn       | 3.73763e-25 | 1.00000 | 3.73763e-25 | 1.00000 |
| rad56          | 2.36943e-25 | 1.00000 | 2.36943e-25 | 1.00000 |
| PAH8+H         | 1.62023e-25 | 1.00000 | 1.62023e-25 | 1.00000 |
| rad64          | 5.78967e-26 | 1.00000 | 5.78967e-26 | 1.00000 |
| rad73          | 2.75233e-27 | 1.00000 | 2.75233e-27 | 1.00000 |
| rad71          | 5.01446e-29 | 1.00000 | 5.01446e-29 | 1.00000 |
| rad8           | 8.35729e-33 | 1.00000 | 8.35729e-33 | 1.00000 |

100000.000 Pa, 280.000000 K

=====

| Rate constant             | True (fraction)        | Effective (fraction)   |
|---------------------------|------------------------|------------------------|
| Total                     | 3.52572e-14 (1.00 )    | 3.52572e-14 (1.00 )    |
| Formation of rad19        | 3.52244e-14 (0.999 )   | 3.52244e-14 (0.999 )   |
| H-abstraction to cyc2enyl | 3.26639e-17 (0.000926) | 3.26639e-17 (0.000926) |
| H-abstraction to cyclenyl | 9.42926e-20 (2.67e-06) | 9.42926e-20 (2.67e-06) |

| species                       | PYtrue      | Cumul    | PYeffective | Cumul    |
|-------------------------------|-------------|----------|-------------|----------|
| rad9                          | 0.990290    | 0.990290 | 0.990290    | 0.990290 |
| Indene+H                      | 0.00537736  | 0.995667 | 0.00537736  | 0.995667 |
| rad15                         | 0.00339965  | 0.999067 | 0.00339965  | 0.999067 |
| Benzene+cycloprop-2-enylidene | 0.000926445 | 0.999993 | 0.000926445 | 0.999993 |
| Benzene+cycloprop-1-enylidene | 2.67442e-06 | 0.999996 | 2.67442e-06 | 0.999996 |
| rad19anti                     | 2.06542e-06 | 0.999998 | 2.06542e-06 | 0.999998 |
| PhCHCCH2+H                    | 1.74163e-06 | 1.000000 | 1.74163e-06 | 1.000000 |
| rad2                          | 7.31170e-08 | 1.00000  | 7.31170e-08 | 1.00000  |
| rad12                         | 6.87377e-08 | 1.00000  | 6.87377e-08 | 1.00000  |

|                |             |         |             |         |
|----------------|-------------|---------|-------------|---------|
| rad11          | 5.09608e-08 | 1.00000 | 5.09608e-08 | 1.00000 |
| rad6           | 4.02790e-08 | 1.00000 | 4.02790e-08 | 1.00000 |
| rad22          | 1.28125e-08 | 1.00000 | 1.28125e-08 | 1.00000 |
| rad26          | 1.11372e-08 | 1.00000 | 1.11372e-08 | 1.00000 |
| C2H2+PhCH2     | 6.56454e-09 | 1.00000 | 6.56454e-09 | 1.00000 |
| rad1           | 5.75948e-09 | 1.00000 | 5.75948e-09 | 1.00000 |
| rad67          | 4.01766e-09 | 1.00000 | 4.01766e-09 | 1.00000 |
| rad18          | 3.33863e-09 | 1.00000 | 3.33863e-09 | 1.00000 |
| rad45          | 3.07777e-09 | 1.00000 | 3.07777e-09 | 1.00000 |
| rad23          | 1.93757e-09 | 1.00000 | 1.93757e-09 | 1.00000 |
| rad10          | 1.87498e-09 | 1.00000 | 1.87498e-09 | 1.00000 |
| rad35          | 1.71104e-09 | 1.00000 | 1.71104e-09 | 1.00000 |
| rad3           | 4.23228e-10 | 1.00000 | 4.23228e-10 | 1.00000 |
| PhCCCH3+H      | 3.21643e-10 | 1.00000 | 3.21643e-10 | 1.00000 |
| Ph+MeAc        | 2.82326e-10 | 1.00000 | 2.82326e-10 | 1.00000 |
| rad20          | 2.58632e-10 | 1.00000 | 2.58632e-10 | 1.00000 |
| rad4           | 2.28698e-10 | 1.00000 | 2.28698e-10 | 1.00000 |
| rad7           | 2.12633e-10 | 1.00000 | 2.12633e-10 | 1.00000 |
| rad36          | 2.02271e-10 | 1.00000 | 2.02271e-10 | 1.00000 |
| rad21          | 1.83108e-10 | 1.00000 | 1.83108e-10 | 1.00000 |
| PhcycC3H3_A+H  | 1.69685e-10 | 1.00000 | 1.69685e-10 | 1.00000 |
| PhCCH+CH3      | 1.58031e-10 | 1.00000 | 1.58031e-10 | 1.00000 |
| Ph+Allene      | 7.65864e-11 | 1.00000 | 7.65864e-11 | 1.00000 |
| rad5           | 3.83085e-11 | 1.00000 | 3.83085e-11 | 1.00000 |
| rad30          | 2.66344e-11 | 1.00000 | 2.66344e-11 | 1.00000 |
| PhCH2CCH+H     | 1.90055e-11 | 1.00000 | 1.90055e-11 | 1.00000 |
| PhcycC3H3_B+H  | 4.17187e-12 | 1.00000 | 4.17187e-12 | 1.00000 |
| Phenyl+cycC3H4 | 3.74720e-12 | 1.00000 | 0.00000     | 1.00000 |
| rad25          | 3.02279e-12 | 1.00000 | 3.02279e-12 | 1.00000 |
| rad27          | 1.42198e-12 | 1.00000 | 1.42198e-12 | 1.00000 |
| rad13          | 1.00012e-12 | 1.00000 | 1.00012e-12 | 1.00000 |
| rad14          | 2.78167e-13 | 1.00000 | 2.78167e-13 | 1.00000 |
| rad37          | 2.34468e-13 | 1.00000 | 2.34468e-13 | 1.00000 |
| rad28          | 2.32697e-13 | 1.00000 | 2.32697e-13 | 1.00000 |
| rad60syn       | 1.71538e-13 | 1.00000 | 1.71538e-13 | 1.00000 |
| PAH3+H         | 1.23835e-13 | 1.00000 | 1.23835e-13 | 1.00000 |
| rad60anti      | 8.70907e-14 | 1.00000 | 8.70907e-14 | 1.00000 |
| PAH7+H         | 5.87923e-14 | 1.00000 | 5.87923e-14 | 1.00000 |
| rad59          | 2.31823e-14 | 1.00000 | 2.31823e-14 | 1.00000 |
| rad38          | 8.08087e-15 | 1.00000 | 8.08087e-15 | 1.00000 |
| PAH9+H         | 2.74444e-15 | 1.00000 | 2.74444e-15 | 1.00000 |
| rad33          | 1.78349e-15 | 1.00000 | 1.78349e-15 | 1.00000 |
| PAH10+CH3      | 1.75897e-15 | 1.00000 | 1.75897e-15 | 1.00000 |
| rad24          | 1.25447e-15 | 1.00000 | 1.25447e-15 | 1.00000 |
| rad46          | 5.44176e-16 | 1.00000 | 5.44176e-16 | 1.00000 |
| rad43          | 2.52325e-16 | 1.00000 | 2.52325e-16 | 1.00000 |
| rad70          | 2.89697e-17 | 1.00000 | 2.89697e-17 | 1.00000 |
| rad39          | 2.04857e-17 | 1.00000 | 2.04857e-17 | 1.00000 |
| rad62          | 1.52731e-17 | 1.00000 | 1.52731e-17 | 1.00000 |
| rad58          | 1.40400e-17 | 1.00000 | 1.40400e-17 | 1.00000 |
| rad50          | 9.16142e-18 | 1.00000 | 9.16142e-18 | 1.00000 |
| rad31          | 4.62876e-18 | 1.00000 | 4.62876e-18 | 1.00000 |
| rad34          | 1.19979e-18 | 1.00000 | 1.19979e-18 | 1.00000 |
| PAH1+H         | 1.16550e-18 | 1.00000 | 1.16550e-18 | 1.00000 |
| rad54          | 7.70031e-19 | 1.00000 | 7.70031e-19 | 1.00000 |
| rad41          | 2.15106e-19 | 1.00000 | 2.15106e-19 | 1.00000 |
| rad52          | 1.25287e-19 | 1.00000 | 1.25287e-19 | 1.00000 |
| rad51          | 7.65802e-20 | 1.00000 | 7.65802e-20 | 1.00000 |
| rad42          | 3.23397e-20 | 1.00000 | 3.23397e-20 | 1.00000 |
| rad55          | 1.54104e-20 | 1.00000 | 1.54104e-20 | 1.00000 |
| rad65          | 3.77797e-22 | 1.00000 | 3.77797e-22 | 1.00000 |
| rad61          | 3.37143e-22 | 1.00000 | 3.37143e-22 | 1.00000 |
| rad68syn       | 4.23978e-23 | 1.00000 | 4.23978e-23 | 1.00000 |
| rad68anti      | 3.08750e-23 | 1.00000 | 3.08750e-23 | 1.00000 |
| rad53          | 2.17289e-23 | 1.00000 | 2.17289e-23 | 1.00000 |
| rad47          | 3.49981e-24 | 1.00000 | 3.49981e-24 | 1.00000 |
| rad19syn       | 1.68201e-24 | 1.00000 | 1.68201e-24 | 1.00000 |
| rad40syn       | 1.40183e-24 | 1.00000 | 1.40183e-24 | 1.00000 |
| rad40anti      | 1.12301e-24 | 1.00000 | 1.12301e-24 | 1.00000 |
| rad56          | 6.01295e-25 | 1.00000 | 6.01295e-25 | 1.00000 |
| PAH8+H         | 4.56227e-25 | 1.00000 | 4.56227e-25 | 1.00000 |
| rad64          | 1.49409e-25 | 1.00000 | 1.49409e-25 | 1.00000 |
| rad73          | 7.64965e-27 | 1.00000 | 7.64965e-27 | 1.00000 |
| rad71          | 1.49927e-28 | 1.00000 | 1.49927e-28 | 1.00000 |
| rad8           | 1.15763e-32 | 1.00000 | 1.15763e-32 | 1.00000 |

100000.000 Pa, 290.000000 K

=====

Rate constant | True (fraction) | Effective (fraction)

-----



|                           |                        |                        |
|---------------------------|------------------------|------------------------|
| Total                     | 3.81171e-14 (1.00 )    | 3.81171e-14 (1.00 )    |
| Formation of rad19        | 3.80733e-14 (0.999 )   | 3.80733e-14 (0.999 )   |
| H-abstraction to cyc2enyl | 4.36868e-17 (0.00115 ) | 4.36868e-17 (0.00115 ) |
| H-abstraction to cyclenyl | 1.56861e-19 (4.12e-06) | 1.56861e-19 (4.12e-06) |

| species                       | PYtrue      | Cumul    | PYeffective | Cumul    |
|-------------------------------|-------------|----------|-------------|----------|
| rad9                          | 0.989621    | 0.989621 | 0.989621    | 0.989621 |
| Indene+H                      | 0.00584364  | 0.995465 | 0.00584364  | 0.995465 |
| rad15                         | 0.00337980  | 0.998845 | 0.00337980  | 0.998845 |
| Benzene+cycloprop-2-enylidene | 0.00114612  | 0.999991 | 0.00114612  | 0.999991 |
| Benzene+cycloprop-1-enylidene | 4.11523e-06 | 0.999995 | 4.11523e-06 | 0.999995 |
| rad19anti                     | 2.29842e-06 | 0.999997 | 2.29842e-06 | 0.999997 |
| PhCHCCH2+H                    | 2.03283e-06 | 0.999999 | 2.03283e-06 | 0.999999 |
| rad2                          | 8.54860e-08 | 0.999999 | 8.54860e-08 | 0.999999 |
| rad12                         | 6.78588e-08 | 1.000000 | 6.78588e-08 | 1.000000 |
| rad11                         | 5.65806e-08 | 1.000000 | 5.65806e-08 | 1.000000 |
| rad6                          | 5.00493e-08 | 1.000000 | 5.00493e-08 | 1.000000 |
| rad22                         | 1.44877e-08 | 1.000000 | 1.44877e-08 | 1.000000 |
| rad26                         | 1.30677e-08 | 1.000000 | 1.30677e-08 | 1.000000 |
| C2H2+PhCH2                    | 8.15212e-09 | 1.000000 | 8.15212e-09 | 1.000000 |
| rad1                          | 6.82643e-09 | 1.000000 | 6.82643e-09 | 1.000000 |
| rad67                         | 4.90200e-09 | 1.000000 | 4.90200e-09 | 1.000000 |
| rad45                         | 3.65109e-09 | 1.000000 | 3.65109e-09 | 1.000000 |
| rad18                         | 3.28338e-09 | 1.000000 | 3.28338e-09 | 1.000000 |
| rad23                         | 2.48318e-09 | 1.000000 | 2.48318e-09 | 1.000000 |
| rad10                         | 2.43999e-09 | 1.000000 | 2.43999e-09 | 1.000000 |
| rad35                         | 2.07877e-09 | 1.000000 | 2.07877e-09 | 1.000000 |
| rad3                          | 5.33519e-10 | 1.000000 | 5.33519e-10 | 1.000000 |
| PhCCCH3+H                     | 4.52525e-10 | 1.000000 | 4.52525e-10 | 1.000000 |
| Ph+MeAc                       | 4.08223e-10 | 1.000000 | 4.08223e-10 | 1.000000 |
| rad4                          | 2.89394e-10 | 1.000000 | 2.89394e-10 | 1.000000 |
| rad20                         | 2.61952e-10 | 1.000000 | 2.61952e-10 | 1.000000 |
| rad36                         | 2.41714e-10 | 1.000000 | 2.41714e-10 | 1.000000 |
| PhCCH+CH3                     | 2.39547e-10 | 1.000000 | 2.39547e-10 | 1.000000 |
| rad7                          | 2.30902e-10 | 1.000000 | 2.30902e-10 | 1.000000 |
| PhcycC3H3_A+H                 | 2.27921e-10 | 1.000000 | 2.27921e-10 | 1.000000 |
| rad21                         | 1.85785e-10 | 1.000000 | 1.85785e-10 | 1.000000 |
| Ph+Allene                     | 1.05543e-10 | 1.000000 | 1.05543e-10 | 1.000000 |
| rad5                          | 4.77886e-11 | 1.000000 | 4.77886e-11 | 1.000000 |
| rad30                         | 3.29400e-11 | 1.000000 | 3.29400e-11 | 1.000000 |
| PhCH2CCH+H                    | 2.70335e-11 | 1.000000 | 2.70335e-11 | 1.000000 |
| PhcycC3H3_B+H                 | 6.40664e-12 | 1.000000 | 6.40664e-12 | 1.000000 |
| Phenyl+cycC3H4                | 5.36566e-12 | 1.000000 | 0.000000    | 1.000000 |
| rad25                         | 3.36185e-12 | 1.000000 | 3.36185e-12 | 1.000000 |
| rad27                         | 1.65045e-12 | 1.000000 | 1.65045e-12 | 1.000000 |
| rad13                         | 1.22933e-12 | 1.000000 | 1.22933e-12 | 1.000000 |
| rad14                         | 3.62978e-13 | 1.000000 | 3.62978e-13 | 1.000000 |
| rad28                         | 3.47227e-13 | 1.000000 | 3.47227e-13 | 1.000000 |
| rad37                         | 3.40765e-13 | 1.000000 | 3.40765e-13 | 1.000000 |
| rad60syn                      | 2.23018e-13 | 1.000000 | 2.23018e-13 | 1.000000 |
| PAH3+H                        | 1.70438e-13 | 1.000000 | 1.70438e-13 | 1.000000 |
| rad60anti                     | 1.13702e-13 | 1.000000 | 1.13702e-13 | 1.000000 |
| PAH7+H                        | 8.51673e-14 | 1.000000 | 8.51673e-14 | 1.000000 |
| rad59                         | 3.16036e-14 | 1.000000 | 3.16036e-14 | 1.000000 |
| rad38                         | 1.20648e-14 | 1.000000 | 1.20648e-14 | 1.000000 |
| PAH9+H                        | 4.42809e-15 | 1.000000 | 4.42809e-15 | 1.000000 |
| PAH10+CH3                     | 2.92512e-15 | 1.000000 | 2.92512e-15 | 1.000000 |
| rad33                         | 2.17546e-15 | 1.000000 | 2.17546e-15 | 1.000000 |
| rad24                         | 1.29499e-15 | 1.000000 | 1.29499e-15 | 1.000000 |
| rad46                         | 8.27055e-16 | 1.000000 | 8.27055e-16 | 1.000000 |
| rad43                         | 4.24174e-16 | 1.000000 | 4.24174e-16 | 1.000000 |
| rad70                         | 4.83796e-17 | 1.000000 | 4.83796e-17 | 1.000000 |
| rad39                         | 3.84396e-17 | 1.000000 | 3.84396e-17 | 1.000000 |
| rad62                         | 2.83614e-17 | 1.000000 | 2.83614e-17 | 1.000000 |
| rad58                         | 2.21340e-17 | 1.000000 | 2.21340e-17 | 1.000000 |
| rad50                         | 1.52940e-17 | 1.000000 | 1.52940e-17 | 1.000000 |
| rad31                         | 6.17491e-18 | 1.000000 | 6.17491e-18 | 1.000000 |
| PAH1+H                        | 2.16937e-18 | 1.000000 | 2.16937e-18 | 1.000000 |
| rad34                         | 2.11347e-18 | 1.000000 | 2.11347e-18 | 1.000000 |
| rad54                         | 1.40918e-18 | 1.000000 | 1.40918e-18 | 1.000000 |
| rad41                         | 4.16248e-19 | 1.000000 | 4.16248e-19 | 1.000000 |
| rad52                         | 2.20584e-19 | 1.000000 | 2.20584e-19 | 1.000000 |
| rad51                         | 1.41693e-19 | 1.000000 | 1.41693e-19 | 1.000000 |
| rad42                         | 6.66216e-20 | 1.000000 | 6.66216e-20 | 1.000000 |
| rad55                         | 2.94643e-20 | 1.000000 | 2.94643e-20 | 1.000000 |
| rad65                         | 7.66223e-22 | 1.000000 | 7.66223e-22 | 1.000000 |
| rad61                         | 7.48862e-22 | 1.000000 | 7.48862e-22 | 1.000000 |
| rad68syn                      | 9.49257e-23 | 1.000000 | 9.49257e-23 | 1.000000 |
| rad68anti                     | 6.89375e-23 | 1.000000 | 6.89375e-23 | 1.000000 |

|           |             |          |             |          |
|-----------|-------------|----------|-------------|----------|
| rad53     | 4.78916e-23 | 1.000000 | 4.78916e-23 | 1.000000 |
| rad19syn  | 7.79336e-24 | 1.000000 | 7.79336e-24 | 1.000000 |
| rad47     | 4.98880e-24 | 1.000000 | 4.98880e-24 | 1.000000 |
| rad40syn  | 3.53073e-24 | 1.000000 | 3.53073e-24 | 1.000000 |
| rad40anti | 2.84519e-24 | 1.000000 | 2.84519e-24 | 1.000000 |
| rad56     | 1.44387e-24 | 1.000000 | 1.44387e-24 | 1.000000 |
| PAH8+H    | 1.19595e-24 | 1.000000 | 1.19595e-24 | 1.000000 |
| rad64     | 3.66202e-25 | 1.000000 | 3.66202e-25 | 1.000000 |
| rad73     | 1.99668e-26 | 1.000000 | 1.99668e-26 | 1.000000 |
| rad71     | 4.16214e-28 | 1.000000 | 4.16214e-28 | 1.000000 |
| rad8      | 1.83283e-32 | 1.000000 | 1.83283e-32 | 1.000000 |

100000.000 Pa, 300.000000 K

| Rate constant             | True (fraction)        | Effective (fraction)   |
|---------------------------|------------------------|------------------------|
| Total                     | 5.34809e-14 (1.00 )    | 5.34809e-14 (1.00 )    |
| Formation of rad19        | 5.34010e-14 (0.999 )   | 5.34010e-14 (0.999 )   |
| H-abstraction to cyc2enyl | 7.95823e-17 (0.00149 ) | 7.95823e-17 (0.00149 ) |
| H-abstraction to cyclenyl | 3.44981e-19 (6.45e-06) | 3.44981e-19 (6.45e-06) |

| species                       | PYtrue      | Cumul    | PYeffective | Cumul    |
|-------------------------------|-------------|----------|-------------|----------|
| rad9                          | 0.985964    | 0.985964 | 0.985964    | 0.985964 |
| Indene+H                      | 0.00914137  | 0.995106 | 0.00914137  | 0.995106 |
| rad15                         | 0.00337673  | 0.998482 | 0.00337673  | 0.998482 |
| Benzene+cycloprop-2-enylidene | 0.00148805  | 0.999970 | 0.00148805  | 0.999970 |
| rad19anti                     | 1.78719e-05 | 0.999988 | 1.78719e-05 | 0.999988 |
| Benzene+cycloprop-1-enylidene | 6.45054e-06 | 0.999995 | 6.45054e-06 | 0.999995 |
| PhCHCCH2+H                    | 4.44550e-06 | 0.999999 | 4.44550e-06 | 0.999999 |
| rad2                          | 1.87747e-07 | 0.999999 | 1.87747e-07 | 0.999999 |
| rad6                          | 1.74279e-07 | 1.000000 | 1.74279e-07 | 1.000000 |
| rad11                         | 8.17126e-08 | 1.000000 | 8.17126e-08 | 1.000000 |
| rad12                         | 7.69575e-08 | 1.000000 | 7.69575e-08 | 1.000000 |
| rad26                         | 3.19849e-08 | 1.000000 | 3.19849e-08 | 1.000000 |
| C2H2+PhCH2                    | 2.87436e-08 | 1.000000 | 2.87436e-08 | 1.000000 |
| rad22                         | 2.43595e-08 | 1.000000 | 2.43595e-08 | 1.000000 |
| rad67                         | 1.48730e-08 | 1.000000 | 1.48730e-08 | 1.000000 |
| rad1                          | 1.46330e-08 | 1.000000 | 1.46330e-08 | 1.000000 |
| rad10                         | 1.01485e-08 | 1.000000 | 1.01485e-08 | 1.000000 |
| rad23                         | 9.38854e-09 | 1.000000 | 9.38854e-09 | 1.000000 |
| rad45                         | 8.89436e-09 | 1.000000 | 8.89436e-09 | 1.000000 |
| rad35                         | 6.05632e-09 | 1.000000 | 6.05632e-09 | 1.000000 |
| Ph+MeAc                       | 4.50311e-09 | 1.000000 | 4.50311e-09 | 1.000000 |
| PhCCCH3+H                     | 4.05312e-09 | 1.000000 | 4.05312e-09 | 1.000000 |
| PhCCH+CH3                     | 3.20413e-09 | 1.000000 | 3.20413e-09 | 1.000000 |
| rad18                         | 2.99136e-09 | 1.000000 | 2.99136e-09 | 1.000000 |
| rad3                          | 1.65115e-09 | 1.000000 | 1.65115e-09 | 1.000000 |
| rad4                          | 8.50732e-10 | 1.000000 | 8.50732e-10 | 1.000000 |
| Ph+Allene                     | 5.86559e-10 | 1.000000 | 5.86559e-10 | 1.000000 |
| rad7                          | 3.86300e-10 | 1.000000 | 3.86300e-10 | 1.000000 |
| PhcycC3H3_A+H                 | 3.75803e-10 | 1.000000 | 3.75803e-10 | 1.000000 |
| rad36                         | 3.07132e-10 | 1.000000 | 3.07132e-10 | 1.000000 |
| rad20                         | 2.51432e-10 | 1.000000 | 2.51432e-10 | 1.000000 |
| PhCH2CCH+H                    | 2.49038e-10 | 1.000000 | 2.49038e-10 | 1.000000 |
| rad21                         | 1.87317e-10 | 1.000000 | 1.87317e-10 | 1.000000 |
| rad5                          | 1.39596e-10 | 1.000000 | 1.39596e-10 | 1.000000 |
| rad30                         | 1.03658e-10 | 1.000000 | 1.03658e-10 | 1.000000 |
| PhcycC3H3_B+H                 | 1.43931e-11 | 1.000000 | 1.43931e-11 | 1.000000 |
| Phenyl+cycC3H4                | 8.21398e-12 | 1.000000 | 0.000000    | 1.000000 |
| rad28                         | 5.37397e-12 | 1.000000 | 5.37397e-12 | 1.000000 |
| rad25                         | 5.29023e-12 | 1.000000 | 5.29023e-12 | 1.000000 |
| rad37                         | 4.90082e-12 | 1.000000 | 4.90082e-12 | 1.000000 |
| rad13                         | 3.67306e-12 | 1.000000 | 3.67306e-12 | 1.000000 |
| rad27                         | 3.45761e-12 | 1.000000 | 3.45761e-12 | 1.000000 |
| PAH3+H                        | 1.24727e-12 | 1.000000 | 1.24727e-12 | 1.000000 |
| rad14                         | 1.21164e-12 | 1.000000 | 1.21164e-12 | 1.000000 |
| rad60syn                      | 9.79202e-13 | 1.000000 | 9.79202e-13 | 1.000000 |
| PAH7+H                        | 8.38647e-13 | 1.000000 | 8.38647e-13 | 1.000000 |
| rad60anti                     | 5.16161e-13 | 1.000000 | 5.16161e-13 | 1.000000 |
| rad38                         | 2.18931e-13 | 1.000000 | 2.18931e-13 | 1.000000 |
| rad59                         | 2.00275e-13 | 1.000000 | 2.00275e-13 | 1.000000 |
| PAH9+H                        | 1.84035e-13 | 1.000000 | 1.84035e-13 | 1.000000 |
| PAH10+CH3                     | 1.55976e-13 | 1.000000 | 1.55976e-13 | 1.000000 |
| rad46                         | 1.85158e-14 | 1.000000 | 1.85158e-14 | 1.000000 |
| rad43                         | 1.62667e-14 | 1.000000 | 1.62667e-14 | 1.000000 |
| rad39                         | 7.74197e-15 | 1.000000 | 7.74197e-15 | 1.000000 |
| rad33                         | 7.14489e-15 | 1.000000 | 7.14489e-15 | 1.000000 |
| rad24                         | 2.26220e-15 | 1.000000 | 2.26220e-15 | 1.000000 |
| rad62                         | 1.83751e-15 | 1.000000 | 1.83751e-15 | 1.000000 |

|           |             |          |             |          |
|-----------|-------------|----------|-------------|----------|
| rad70     | 1.45697e-15 | 1.000000 | 1.45697e-15 | 1.000000 |
| rad50     | 9.99155e-16 | 1.000000 | 9.99155e-16 | 1.000000 |
| rad58     | 3.79083e-16 | 1.000000 | 3.79083e-16 | 1.000000 |
| PAH1+H    | 2.49017e-16 | 1.000000 | 2.49017e-16 | 1.000000 |
| rad54     | 1.98292e-16 | 1.000000 | 1.98292e-16 | 1.000000 |
| rad34     | 1.02706e-16 | 1.000000 | 1.02706e-16 | 1.000000 |
| rad41     | 5.89851e-17 | 1.000000 | 5.89851e-17 | 1.000000 |
| rad31     | 3.99474e-17 | 1.000000 | 3.99474e-17 | 1.000000 |
| rad51     | 3.14112e-17 | 1.000000 | 3.14112e-17 | 1.000000 |
| rad52     | 2.78606e-17 | 1.000000 | 2.78606e-17 | 1.000000 |
| rad42     | 1.17403e-17 | 1.000000 | 1.17403e-17 | 1.000000 |
| rad55     | 6.34142e-18 | 1.000000 | 6.34142e-18 | 1.000000 |
| rad19syn  | 1.18375e-18 | 1.000000 | 1.18375e-18 | 1.000000 |
| rad61     | 1.18314e-18 | 1.000000 | 1.18314e-18 | 1.000000 |
| rad65     | 5.57633e-19 | 1.000000 | 5.57633e-19 | 1.000000 |
| rad53     | 7.97290e-20 | 1.000000 | 7.97290e-20 | 1.000000 |
| rad68syn  | 7.00595e-20 | 1.000000 | 7.00595e-20 | 1.000000 |
| rad68anti | 4.84892e-20 | 1.000000 | 4.84892e-20 | 1.000000 |
| PAH8+H    | 2.93830e-20 | 1.000000 | 2.93830e-20 | 1.000000 |
| rad40syn  | 2.26983e-20 | 1.000000 | 2.26983e-20 | 1.000000 |
| rad40anti | 1.95361e-20 | 1.000000 | 1.95361e-20 | 1.000000 |
| rad56     | 1.43341e-20 | 1.000000 | 1.43341e-20 | 1.000000 |
| rad64     | 9.38547e-21 | 1.000000 | 9.38547e-21 | 1.000000 |
| rad73     | 2.21373e-21 | 1.000000 | 2.21373e-21 | 1.000000 |
| rad71     | 6.29405e-22 | 1.000000 | 6.29405e-22 | 1.000000 |
| rad47     | 7.77135e-23 | 1.000000 | 7.77135e-23 | 1.000000 |
| rad72     | 3.73254e-25 | 1.000000 | 3.73254e-25 | 1.000000 |
| rad8      | 7.72721e-26 | 1.000000 | 7.72721e-26 | 1.000000 |

100000.000 Pa, 310.000000 K

=====

| Rate constant             | True (fraction)        | Effective (fraction)   |
|---------------------------|------------------------|------------------------|
| Total                     | 5.92544e-14 (1.00 )    | 5.92544e-14 (1.00 )    |
| Formation of rad19        | 5.91462e-14 (0.998 )   | 5.91462e-14 (0.998 )   |
| H-abstraction to cyc2enyl | 1.07628e-16 (0.00182 ) | 1.07628e-16 (0.00182 ) |
| H-abstraction to cyc1enyl | 5.62537e-19 (9.49e-06) | 5.62537e-19 (9.49e-06) |

| species                       | PYtrue      | Cumul    | PYeffective | Cumul    |
|-------------------------------|-------------|----------|-------------|----------|
| rad9                          | 0.987923    | 0.987923 | 0.987923    | 0.987923 |
| Indene+H                      | 0.00690434  | 0.994827 | 0.00690434  | 0.994827 |
| rad15                         | 0.00334051  | 0.998168 | 0.00334051  | 0.998168 |
| Benzene+cycloprop-2-enylidene | 0.00181637  | 0.999984 | 0.00181637  | 0.999984 |
| Benzene+cycloprop-1-enylidene | 9.49359e-06 | 0.999994 | 9.49359e-06 | 0.999994 |
| rad19anti                     | 3.07133e-06 | 0.999997 | 3.07133e-06 | 0.999997 |
| PhCHCCH2+H                    | 2.79319e-06 | 0.999999 | 2.79319e-06 | 0.999999 |
| rad2                          | 1.17478e-07 | 1.000000 | 1.17478e-07 | 1.000000 |
| rad6                          | 7.73931e-08 | 1.000000 | 7.73931e-08 | 1.000000 |
| rad11                         | 6.94013e-08 | 1.000000 | 6.94013e-08 | 1.000000 |
| rad12                         | 6.64789e-08 | 1.000000 | 6.64789e-08 | 1.000000 |
| rad22                         | 1.83880e-08 | 1.000000 | 1.83880e-08 | 1.000000 |
| rad26                         | 1.81405e-08 | 1.000000 | 1.81405e-08 | 1.000000 |
| C2H2+PhCH2                    | 1.26301e-08 | 1.000000 | 1.26301e-08 | 1.000000 |
| rad1                          | 9.67526e-09 | 1.000000 | 9.67526e-09 | 1.000000 |
| rad67                         | 7.34500e-09 | 1.000000 | 7.34500e-09 | 1.000000 |
| rad45                         | 5.15214e-09 | 1.000000 | 5.15214e-09 | 1.000000 |
| rad10                         | 4.14747e-09 | 1.000000 | 4.14747e-09 | 1.000000 |
| rad23                         | 4.06929e-09 | 1.000000 | 4.06929e-09 | 1.000000 |
| rad18                         | 3.17127e-09 | 1.000000 | 3.17127e-09 | 1.000000 |
| rad35                         | 3.08834e-09 | 1.000000 | 3.08834e-09 | 1.000000 |
| PhCCCH3+H                     | 9.05246e-10 | 1.000000 | 9.05246e-10 | 1.000000 |
| Ph+MeAc                       | 8.61371e-10 | 1.000000 | 8.61371e-10 | 1.000000 |
| rad3                          | 8.41954e-10 | 1.000000 | 8.41954e-10 | 1.000000 |
| PhCCH+CH3                     | 5.44869e-10 | 1.000000 | 5.44869e-10 | 1.000000 |
| rad4                          | 4.60698e-10 | 1.000000 | 4.60698e-10 | 1.000000 |
| PhcycC3H3_A+H                 | 4.07507e-10 | 1.000000 | 4.07507e-10 | 1.000000 |
| rad36                         | 3.46831e-10 | 1.000000 | 3.46831e-10 | 1.000000 |
| rad7                          | 2.77934e-10 | 1.000000 | 2.77934e-10 | 1.000000 |
| rad20                         | 2.69872e-10 | 1.000000 | 2.69872e-10 | 1.000000 |
| Ph+Allene                     | 2.00907e-10 | 1.000000 | 2.00907e-10 | 1.000000 |
| rad21                         | 1.92111e-10 | 1.000000 | 1.92111e-10 | 1.000000 |
| rad5                          | 7.42579e-11 | 1.000000 | 7.42579e-11 | 1.000000 |
| PhCH2CCH+H                    | 5.47151e-11 | 1.000000 | 5.47151e-11 | 1.000000 |
| rad30                         | 5.06228e-11 | 1.000000 | 5.06228e-11 | 1.000000 |
| PhcycC3H3_B+H                 | 1.45400e-11 | 1.000000 | 1.45400e-11 | 1.000000 |
| Phenyl+cycC3H4                | 1.07884e-11 | 1.000000 | 0.00000     | 1.000000 |
| rad25                         | 4.12681e-12 | 1.000000 | 4.12681e-12 | 1.000000 |
| rad27                         | 2.23405e-12 | 1.000000 | 2.23405e-12 | 1.000000 |
| rad13                         | 1.86004e-12 | 1.000000 | 1.86004e-12 | 1.000000 |

|           |             |          |             |          |
|-----------|-------------|----------|-------------|----------|
| rad28     | 7.73757e-13 | 1.000000 | 7.73757e-13 | 1.000000 |
| rad37     | 7.25672e-13 | 1.000000 | 7.25672e-13 | 1.000000 |
| rad14     | 6.07029e-13 | 1.000000 | 6.07029e-13 | 1.000000 |
| rad60syn  | 3.78729e-13 | 1.000000 | 3.78729e-13 | 1.000000 |
| PAH3+H    | 3.23617e-13 | 1.000000 | 3.23617e-13 | 1.000000 |
| rad60anti | 1.94693e-13 | 1.000000 | 1.94693e-13 | 1.000000 |
| PAH7+H    | 1.77952e-13 | 1.000000 | 1.77952e-13 | 1.000000 |
| rad59     | 5.88848e-14 | 1.000000 | 5.88848e-14 | 1.000000 |
| rad38     | 2.70853e-14 | 1.000000 | 2.70853e-14 | 1.000000 |
| PAH9+H    | 1.14546e-14 | 1.000000 | 1.14546e-14 | 1.000000 |
| PAH10+CH3 | 7.97368e-15 | 1.000000 | 7.97368e-15 | 1.000000 |
| rad33     | 3.25145e-15 | 1.000000 | 3.25145e-15 | 1.000000 |
| rad46     | 1.92111e-15 | 1.000000 | 1.92111e-15 | 1.000000 |
| rad24     | 1.42370e-15 | 1.000000 | 1.42370e-15 | 1.000000 |
| rad43     | 1.18023e-15 | 1.000000 | 1.18023e-15 | 1.000000 |
| rad70     | 1.30900e-16 | 1.000000 | 1.30900e-16 | 1.000000 |
| rad39     | 1.30558e-16 | 1.000000 | 1.30558e-16 | 1.000000 |
| rad62     | 9.28710e-17 | 1.000000 | 9.28710e-17 | 1.000000 |
| rad58     | 5.39983e-17 | 1.000000 | 5.39983e-17 | 1.000000 |
| rad50     | 4.23673e-17 | 1.000000 | 4.23673e-17 | 1.000000 |
| rad31     | 1.14596e-17 | 1.000000 | 1.14596e-17 | 1.000000 |
| PAH1+H    | 7.18033e-18 | 1.000000 | 7.18033e-18 | 1.000000 |
| rad34     | 6.26863e-18 | 1.000000 | 6.26863e-18 | 1.000000 |
| rad54     | 4.53391e-18 | 1.000000 | 4.53391e-18 | 1.000000 |
| rad41     | 1.47126e-18 | 1.000000 | 1.47126e-18 | 1.000000 |
| rad52     | 6.71891e-19 | 1.000000 | 6.71891e-19 | 1.000000 |
| rad51     | 4.70307e-19 | 1.000000 | 4.70307e-19 | 1.000000 |
| rad42     | 2.59962e-19 | 1.000000 | 2.59962e-19 | 1.000000 |
| rad55     | 1.01881e-19 | 1.000000 | 1.01881e-19 | 1.000000 |
| rad61     | 3.24944e-21 | 1.000000 | 3.24944e-21 | 1.000000 |
| rad65     | 2.95557e-21 | 1.000000 | 2.95557e-21 | 1.000000 |
| rad68syn  | 4.13565e-22 | 1.000000 | 4.13565e-22 | 1.000000 |
| rad68anti | 2.99060e-22 | 1.000000 | 2.99060e-22 | 1.000000 |
| rad53     | 2.07069e-22 | 1.000000 | 2.07069e-22 | 1.000000 |
| rad19syn  | 1.78884e-22 | 1.000000 | 1.78884e-22 | 1.000000 |
| rad40syn  | 1.88167e-23 | 1.000000 | 1.88167e-23 | 1.000000 |
| rad40anti | 1.53440e-23 | 1.000000 | 1.53440e-23 | 1.000000 |
| rad47     | 1.05767e-23 | 1.000000 | 1.05767e-23 | 1.000000 |
| rad56     | 7.10783e-24 | 1.000000 | 7.10783e-24 | 1.000000 |
| PAH8+H    | 6.77699e-24 | 1.000000 | 6.77699e-24 | 1.000000 |
| rad64     | 1.89119e-24 | 1.000000 | 1.89119e-24 | 1.000000 |
| rad73     | 1.14234e-25 | 1.000000 | 1.14234e-25 | 1.000000 |
| rad71     | 2.62513e-27 | 1.000000 | 2.62513e-27 | 1.000000 |
| rad8      | 6.36919e-32 | 1.000000 | 6.36919e-32 | 1.000000 |

100000.000 Pa, 400.000000 K

| Rate constant             | True (fraction)        | Effective (fraction)   |
|---------------------------|------------------------|------------------------|
| Total                     | 1.29463e-13 (1.00 )    | 1.29463e-13 (1.00 )    |
| Formation of rad19        | 1.28526e-13 (0.993 )   | 1.28526e-13 (0.993 )   |
| H-abstraction to cyc2enyl | 9.19357e-16 (0.00710 ) | 9.19357e-16 (0.00710 ) |
| H-abstraction to cyclenyl | 1.69485e-17 (0.000131) | 1.69485e-17 (0.000131) |

| species                       | PYtrue      | Cumul    | PYeffective | Cumul    |
|-------------------------------|-------------|----------|-------------|----------|
| rad9                          | 0.965768    | 0.965768 | 0.965768    | 0.965768 |
| Indene+H                      | 0.0237164   | 0.989485 | 0.0237164   | 0.989485 |
| Benzene+cycloprop-2-enylidene | 0.00710133  | 0.996586 | 0.00710133  | 0.996586 |
| rad15                         | 0.00317900  | 0.999765 | 0.00317900  | 0.999765 |
| Benzene+cycloprop-1-enylidene | 0.000130914 | 0.999896 | 0.000130914 | 0.999896 |
| rad19anti                     | 6.37039e-05 | 0.999960 | 6.37039e-05 | 0.999960 |
| PhCHCCH2+H                    | 3.47828e-05 | 0.999995 | 3.47828e-05 | 0.999995 |
| rad6                          | 1.83213e-06 | 0.999996 | 1.83213e-06 | 0.999996 |
| rad2                          | 9.61962e-07 | 0.999997 | 9.61962e-07 | 0.999997 |
| C2H2+PhCH2                    | 3.88442e-07 | 0.999998 | 3.88442e-07 | 0.999998 |
| Ph+MeAc                       | 2.60679e-07 | 0.999998 | 2.60679e-07 | 0.999998 |
| rad26                         | 2.52279e-07 | 0.999998 | 2.52279e-07 | 0.999998 |
| PhCCCH3+H                     | 1.83971e-07 | 0.999998 | 1.83971e-07 | 0.999998 |
| rad67                         | 1.79310e-07 | 0.999999 | 1.79310e-07 | 0.999999 |
| rad11                         | 1.72803e-07 | 0.999999 | 1.72803e-07 | 0.999999 |
| PhCCH+CH3                     | 1.36865e-07 | 0.999999 | 1.36865e-07 | 0.999999 |
| rad10                         | 1.13855e-07 | 0.999999 | 1.13855e-07 | 0.999999 |
| rad23                         | 1.07681e-07 | 0.999999 | 1.07681e-07 | 0.999999 |
| rad12                         | 9.70854e-08 | 0.999999 | 9.70854e-08 | 0.999999 |
| rad1                          | 9.20746e-08 | 0.999999 | 9.20746e-08 | 0.999999 |
| rad35                         | 6.93848e-08 | 0.999999 | 6.93848e-08 | 0.999999 |
| rad45                         | 6.50461e-08 | 1.000000 | 6.50461e-08 | 1.000000 |
| rad22                         | 6.14340e-08 | 1.000000 | 6.14340e-08 | 1.000000 |
| Ph+Allene                     | 2.59345e-08 | 1.000000 | 2.59345e-08 | 1.000000 |

|                |             |          |             |          |
|----------------|-------------|----------|-------------|----------|
| PhCH2CCH+H     | 1.43986e-08 | 1.000000 | 1.43986e-08 | 1.000000 |
| rad3           | 1.07960e-08 | 1.000000 | 1.07960e-08 | 1.000000 |
| PhcycC3H3_A+H  | 7.56159e-09 | 1.000000 | 7.56159e-09 | 1.000000 |
| rad4           | 5.86260e-09 | 1.000000 | 5.86260e-09 | 1.000000 |
| rad7           | 3.43480e-09 | 1.000000 | 3.43480e-09 | 1.000000 |
| rad18          | 2.66706e-09 | 1.000000 | 2.66706e-09 | 1.000000 |
| rad36          | 2.51589e-09 | 1.000000 | 2.51589e-09 | 1.000000 |
| rad30          | 1.41788e-09 | 1.000000 | 1.41788e-09 | 1.000000 |
| PhcycC3H3_B+H  | 9.54141e-10 | 1.000000 | 9.54141e-10 | 1.000000 |
| rad5           | 9.22558e-10 | 1.000000 | 9.22558e-10 | 1.000000 |
| rad37          | 6.79774e-10 | 1.000000 | 6.79774e-10 | 1.000000 |
| rad28          | 5.15063e-10 | 1.000000 | 5.15063e-10 | 1.000000 |
| rad20          | 3.33231e-10 | 1.000000 | 3.33231e-10 | 1.000000 |
| rad21          | 2.53483e-10 | 1.000000 | 2.53483e-10 | 1.000000 |
| Phenyl+cycC3H4 | 2.22643e-10 | 1.000000 | 0.00000     | 1.000000 |
| PAH7+H         | 1.04086e-10 | 1.000000 | 1.04086e-10 | 1.000000 |
| PAH10+CH3      | 8.32465e-11 | 1.000000 | 8.32465e-11 | 1.000000 |
| PAH9+H         | 6.98226e-11 | 1.000000 | 6.98226e-11 | 1.000000 |
| PAH3+H         | 6.39463e-11 | 1.000000 | 6.39463e-11 | 1.000000 |
| rad38          | 5.54882e-11 | 1.000000 | 5.54882e-11 | 1.000000 |
| rad13          | 3.29564e-11 | 1.000000 | 3.29564e-11 | 1.000000 |
| rad60syn       | 2.53662e-11 | 1.000000 | 2.53662e-11 | 1.000000 |
| rad27          | 1.66648e-11 | 1.000000 | 1.66648e-11 | 1.000000 |
| rad60anti      | 1.40575e-11 | 1.000000 | 1.40575e-11 | 1.000000 |
| rad39          | 1.15500e-11 | 1.000000 | 1.15500e-11 | 1.000000 |
| rad25          | 1.11300e-11 | 1.000000 | 1.11300e-11 | 1.000000 |
| rad59          | 9.08829e-12 | 1.000000 | 9.08829e-12 | 1.000000 |
| rad14          | 8.38480e-12 | 1.000000 | 8.38480e-12 | 1.000000 |
| rad46          | 6.50159e-12 | 1.000000 | 6.50159e-12 | 1.000000 |
| rad43          | 3.04722e-12 | 1.000000 | 3.04722e-12 | 1.000000 |
| rad50          | 1.26889e-12 | 1.000000 | 1.26889e-12 | 1.000000 |
| rad70          | 3.50724e-13 | 1.000000 | 3.50724e-13 | 1.000000 |
| rad62          | 3.17529e-13 | 1.000000 | 3.17529e-13 | 1.000000 |
| PAH1+H         | 2.79090e-13 | 1.000000 | 2.79090e-13 | 1.000000 |
| rad54          | 2.39949e-13 | 1.000000 | 2.39949e-13 | 1.000000 |
| rad19syn       | 2.09185e-13 | 1.000000 | 2.09185e-13 | 1.000000 |
| rad51          | 1.21236e-13 | 1.000000 | 1.21236e-13 | 1.000000 |
| rad58          | 7.20668e-14 | 1.000000 | 7.20668e-14 | 1.000000 |
| rad33          | 7.08828e-14 | 1.000000 | 7.08828e-14 | 1.000000 |
| rad52          | 6.31565e-14 | 1.000000 | 6.31565e-14 | 1.000000 |
| rad34          | 3.95243e-14 | 1.000000 | 3.95243e-14 | 1.000000 |
| rad41          | 2.82433e-14 | 1.000000 | 2.82433e-14 | 1.000000 |
| rad55          | 1.08581e-14 | 1.000000 | 1.08581e-14 | 1.000000 |
| rad24          | 9.74873e-15 | 1.000000 | 9.74873e-15 | 1.000000 |
| rad61          | 4.92609e-15 | 1.000000 | 4.92609e-15 | 1.000000 |
| rad42          | 4.24692e-15 | 1.000000 | 4.24692e-15 | 1.000000 |
| rad31          | 3.30455e-15 | 1.000000 | 3.30455e-15 | 1.000000 |
| rad65          | 3.29468e-15 | 1.000000 | 3.29468e-15 | 1.000000 |
| rad53          | 4.65065e-16 | 1.000000 | 4.65065e-16 | 1.000000 |
| rad73          | 1.89855e-16 | 1.000000 | 1.89855e-16 | 1.000000 |
| PAH8+H         | 1.82950e-16 | 1.000000 | 1.82950e-16 | 1.000000 |
| rad68syn       | 1.75935e-16 | 1.000000 | 1.75935e-16 | 1.000000 |
| rad56          | 1.74253e-16 | 1.000000 | 1.74253e-16 | 1.000000 |
| rad64          | 1.55060e-16 | 1.000000 | 1.55060e-16 | 1.000000 |
| rad71          | 1.22721e-16 | 1.000000 | 1.22721e-16 | 1.000000 |
| rad68anti      | 1.18886e-16 | 1.000000 | 1.18886e-16 | 1.000000 |
| rad40syn       | 8.09224e-17 | 1.000000 | 8.09224e-17 | 1.000000 |
| rad40anti      | 6.76356e-17 | 1.000000 | 6.76356e-17 | 1.000000 |
| rad72          | 7.05466e-19 | 1.000000 | 7.05466e-19 | 1.000000 |
| rad47          | 7.54411e-20 | 1.000000 | 7.54411e-20 | 1.000000 |
| rad8           | 1.10311e-23 | 1.000000 | 1.10311e-23 | 1.000000 |

100000.000 Pa, 500.000000 K

=====

| Rate constant             | True (fraction)        | Effective (fraction)   |
|---------------------------|------------------------|------------------------|
| Total                     | 2.52837e-13 (1.00 )    | 2.52837e-13 (1.00 )    |
| Formation of rad19        | 2.47941e-13 (0.981 )   | 2.47941e-13 (0.981 )   |
| H-abstraction to cyc2enyl | 4.69058e-15 (0.0186 )  | 4.69058e-15 (0.0186 )  |
| H-abstraction to cyclenyl | 2.05381e-16 (0.000812) | 2.05381e-16 (0.000812) |

| species                       | PYtrue      | Cumul    | PYeffective | Cumul    |
|-------------------------------|-------------|----------|-------------|----------|
| rad9                          | 0.902052    | 0.902052 | 0.902052    | 0.902052 |
| Indene+H                      | 0.0749465   | 0.976998 | 0.0749465   | 0.976998 |
| Benzene+cycloprop-2-enylidene | 0.0185518   | 0.995550 | 0.0185518   | 0.995550 |
| rad15                         | 0.00289039  | 0.998440 | 0.00289039  | 0.998440 |
| Benzene+cycloprop-1-enylidene | 0.000812306 | 0.999253 | 0.000812306 | 0.999253 |
| PhCHCCH2+H                    | 0.000529258 | 0.999782 | 0.000529258 | 0.999782 |
| rad19anti                     | 0.000140944 | 0.999923 | 0.000140944 | 0.999923 |

|                |             |          |             |          |
|----------------|-------------|----------|-------------|----------|
| rad6           | 2.55942e-05 | 0.999948 | 2.55942e-05 | 0.999948 |
| Ph+MeAc        | 1.13420e-05 | 0.999960 | 1.13420e-05 | 0.999960 |
| C2H2+PhCH2     | 1.01422e-05 | 0.999970 | 1.01422e-05 | 0.999970 |
| PhCCCH3+H      | 6.42714e-06 | 0.999976 | 6.42714e-06 | 0.999976 |
| rad67          | 4.20219e-06 | 0.999981 | 4.20219e-06 | 0.999981 |
| PhCCH+CH3      | 3.81107e-06 | 0.999984 | 3.81107e-06 | 0.999984 |
| rad2           | 3.62595e-06 | 0.999988 | 3.62595e-06 | 0.999988 |
| Ph+Allene      | 2.72506e-06 | 0.999991 | 2.72506e-06 | 0.999991 |
| rad26          | 2.31644e-06 | 0.999993 | 2.31644e-06 | 0.999993 |
| PhCH2CCH+H     | 1.65755e-06 | 0.999995 | 1.65755e-06 | 0.999995 |
| rad35          | 1.55311e-06 | 0.999996 | 1.55311e-06 | 0.999996 |
| rad23          | 9.38881e-07 | 0.999997 | 9.38881e-07 | 0.999997 |
| rad45          | 6.44362e-07 | 0.999998 | 6.44362e-07 | 0.999998 |
| rad10          | 6.18706e-07 | 0.999998 | 6.18706e-07 | 0.999998 |
| rad1           | 4.42762e-07 | 0.999999 | 4.42762e-07 | 0.999999 |
| PhcycC3H3_A+H  | 2.89211e-07 | 0.999999 | 2.89211e-07 | 0.999999 |
| rad11          | 2.82306e-07 | 0.999999 | 2.82306e-07 | 0.999999 |
| rad12          | 1.90287e-07 | 1.000000 | 1.90287e-07 | 1.000000 |
| PhcycC3H3_B+H  | 1.34313e-07 | 1.000000 | 1.34313e-07 | 1.000000 |
| rad37          | 1.14731e-07 | 1.000000 | 1.14731e-07 | 1.000000 |
| rad22          | 1.05854e-07 | 1.000000 | 1.05854e-07 | 1.000000 |
| PAH7+H         | 5.05201e-08 | 1.000000 | 5.05201e-08 | 1.000000 |
| rad7           | 4.88700e-08 | 1.000000 | 4.88700e-08 | 1.000000 |
| PAH10+CH3      | 4.29354e-08 | 1.000000 | 4.29354e-08 | 1.000000 |
| rad3           | 4.24507e-08 | 1.000000 | 4.24507e-08 | 1.000000 |
| rad30          | 4.09049e-08 | 1.000000 | 4.09049e-08 | 1.000000 |
| rad28          | 3.76552e-08 | 1.000000 | 3.76552e-08 | 1.000000 |
| rad36          | 3.01568e-08 | 1.000000 | 3.01568e-08 | 1.000000 |
| rad4           | 2.45001e-08 | 1.000000 | 2.45001e-08 | 1.000000 |
| PAH9+H         | 2.24703e-08 | 1.000000 | 2.24703e-08 | 1.000000 |
| rad38          | 1.72873e-08 | 1.000000 | 1.72873e-08 | 1.000000 |
| rad39          | 9.12716e-09 | 1.000000 | 9.12716e-09 | 1.000000 |
| PAH3+H         | 8.36529e-09 | 1.000000 | 8.36529e-09 | 1.000000 |
| Phenyl+cycC3H4 | 3.59351e-09 | 1.000000 | 0.000000    | 1.000000 |
| rad5           | 2.89642e-09 | 1.000000 | 2.89642e-09 | 1.000000 |
| rad46          | 2.69376e-09 | 1.000000 | 2.69376e-09 | 1.000000 |
| rad18          | 2.51663e-09 | 1.000000 | 2.51663e-09 | 1.000000 |
| rad60syn       | 1.56795e-09 | 1.000000 | 1.56795e-09 | 1.000000 |
| rad19syn       | 1.47382e-09 | 1.000000 | 1.47382e-09 | 1.000000 |
| rad50          | 1.33845e-09 | 1.000000 | 1.33845e-09 | 1.000000 |
| rad59          | 1.00942e-09 | 1.000000 | 1.00942e-09 | 1.000000 |
| rad60anti      | 9.18093e-10 | 1.000000 | 9.18093e-10 | 1.000000 |
| rad20          | 4.65403e-10 | 1.000000 | 4.65403e-10 | 1.000000 |
| rad43          | 4.14539e-10 | 1.000000 | 4.14539e-10 | 1.000000 |
| rad13          | 4.06892e-10 | 1.000000 | 4.06892e-10 | 1.000000 |
| rad21          | 3.63123e-10 | 1.000000 | 3.63123e-10 | 1.000000 |
| rad54          | 3.47740e-10 | 1.000000 | 3.47740e-10 | 1.000000 |
| PAH1+H         | 3.21840e-10 | 1.000000 | 3.21840e-10 | 1.000000 |
| rad51          | 2.60116e-10 | 1.000000 | 2.60116e-10 | 1.000000 |
| rad70          | 1.43883e-10 | 1.000000 | 1.43883e-10 | 1.000000 |
| rad52          | 9.51384e-11 | 1.000000 | 9.51384e-11 | 1.000000 |
| rad27          | 5.69933e-11 | 1.000000 | 5.69933e-11 | 1.000000 |
| rad62          | 3.49451e-11 | 1.000000 | 3.49451e-11 | 1.000000 |
| rad58          | 3.00927e-11 | 1.000000 | 3.00927e-11 | 1.000000 |
| rad14          | 2.97156e-11 | 1.000000 | 2.97156e-11 | 1.000000 |
| rad34          | 2.44648e-11 | 1.000000 | 2.44648e-11 | 1.000000 |
| rad55          | 2.01698e-11 | 1.000000 | 2.01698e-11 | 1.000000 |
| rad25          | 1.83922e-11 | 1.000000 | 1.83922e-11 | 1.000000 |
| rad61          | 1.31281e-11 | 1.000000 | 1.31281e-11 | 1.000000 |
| rad41          | 9.70208e-12 | 1.000000 | 9.70208e-12 | 1.000000 |
| rad65          | 7.29989e-12 | 1.000000 | 7.29989e-12 | 1.000000 |
| rad71          | 2.78499e-12 | 1.000000 | 2.78499e-12 | 1.000000 |
| rad73          | 2.54784e-12 | 1.000000 | 2.54784e-12 | 1.000000 |
| rad53          | 2.21884e-12 | 1.000000 | 2.21884e-12 | 1.000000 |
| rad56          | 1.44721e-12 | 1.000000 | 1.44721e-12 | 1.000000 |
| PAH8+H         | 1.14126e-12 | 1.000000 | 1.14126e-12 | 1.000000 |
| rad33          | 1.08862e-12 | 1.000000 | 1.08862e-12 | 1.000000 |
| rad42          | 1.02221e-12 | 1.000000 | 1.02221e-12 | 1.000000 |
| rad64          | 8.78872e-13 | 1.000000 | 8.78872e-13 | 1.000000 |
| rad31          | 6.24993e-13 | 1.000000 | 6.24993e-13 | 1.000000 |
| rad68syn       | 5.05392e-13 | 1.000000 | 5.05392e-13 | 1.000000 |
| rad68anti      | 3.34447e-13 | 1.000000 | 3.34447e-13 | 1.000000 |
| rad40syn       | 2.63801e-13 | 1.000000 | 2.63801e-13 | 1.000000 |
| rad40anti      | 2.06327e-13 | 1.000000 | 2.06327e-13 | 1.000000 |
| rad24          | 1.03463e-13 | 1.000000 | 1.03463e-13 | 1.000000 |
| rad72          | 5.76732e-14 | 1.000000 | 5.76732e-14 | 1.000000 |
| rad47          | 7.94672e-16 | 1.000000 | 7.94672e-16 | 1.000000 |
| rad8           | 1.53133e-20 | 1.000000 | 1.53133e-20 | 1.000000 |

100000.000 Pa, 600.000000 K

=====

| Rate constant             | True (fraction)        | Effective (fraction)   |
|---------------------------|------------------------|------------------------|
| Total                     | 4.35570e-13 (1.00 )    | 4.35570e-13 (1.00 )    |
| Formation of rad19        | 4.18892e-13 (0.962 )   | 4.18892e-13 (0.962 )   |
| H-abstraction to cyc2enyl | 1.54751e-14 (0.0355 )  | 1.54751e-14 (0.0355 )  |
| H-abstraction to cyclenyl | 1.20343e-15 (0.00276 ) | 1.20343e-15 (0.00276 ) |

| species                       | PYtrue      | Cumul    | PYeffective | Cumul    |
|-------------------------------|-------------|----------|-------------|----------|
| rad9                          | 0.707317    | 0.707317 | 0.707317    | 0.707317 |
| Indene+H                      | 0.243216    | 0.950533 | 0.243216    | 0.950533 |
| Benzene+cycloprop-2-enylidene | 0.0355285   | 0.986061 | 0.0355285   | 0.986061 |
| PhCHCCH2+H                    | 0.00762333  | 0.993684 | 0.00762333  | 0.993684 |
| Benzene+cycloprop-1-enylidene | 0.00276289  | 0.996447 | 0.00276289  | 0.996447 |
| rad15                         | 0.00219285  | 0.998640 | 0.00219285  | 0.998640 |
| Ph+MeAc                       | 0.000224942 | 0.998865 | 0.000224942 | 0.998865 |
| rad6                          | 0.000208899 | 0.999074 | 0.000208899 | 0.999074 |
| C2H2+PhCH2                    | 0.000202946 | 0.999277 | 0.000202946 | 0.999277 |
| rad19anti                     | 0.000159533 | 0.999436 | 0.000159533 | 0.999436 |
| Ph+Allene                     | 0.000122954 | 0.999559 | 0.000122954 | 0.999559 |
| PhCCCH3+H                     | 0.000107936 | 0.999667 | 0.000107936 | 0.999667 |
| rad67                         | 7.92463e-05 | 0.999747 | 7.92463e-05 | 0.999747 |
| PhCH2CCH+H                    | 7.51780e-05 | 0.999822 | 7.51781e-05 | 0.999822 |
| PhCCH+CH3                     | 6.08370e-05 | 0.999883 | 6.08370e-05 | 0.999883 |
| rad35                         | 2.87798e-05 | 0.999911 | 2.87798e-05 | 0.999911 |
| PhcycC3H3_A+H                 | 1.86350e-05 | 0.999930 | 1.86350e-05 | 0.999930 |
| PhcycC3H3_B+H                 | 1.74541e-05 | 0.999948 | 1.74542e-05 | 0.999948 |
| rad2                          | 1.07155e-05 | 0.999958 | 1.07155e-05 | 0.999958 |
| rad26                         | 9.52980e-06 | 0.999968 | 9.52980e-06 | 0.999968 |
| rad45                         | 4.82995e-06 | 0.999973 | 4.82995e-06 | 0.999973 |
| rad23                         | 4.72734e-06 | 0.999977 | 4.72734e-06 | 0.999977 |
| rad37                         | 4.30323e-06 | 0.999982 | 4.30323e-06 | 0.999982 |
| PAH10+CH3                     | 3.32079e-06 | 0.999985 | 3.32079e-06 | 0.999985 |
| PAH7+H                        | 3.18002e-06 | 0.999988 | 3.18002e-06 | 0.999988 |
| rad1                          | 1.61165e-06 | 0.999990 | 1.61165e-06 | 0.999990 |
| rad10                         | 1.50878e-06 | 0.999991 | 1.50878e-06 | 0.999991 |
| PAH9+H                        | 1.50572e-06 | 0.999993 | 1.50572e-06 | 0.999993 |
| rad38                         | 1.11542e-06 | 0.999994 | 1.11542e-06 | 0.999994 |
| rad30                         | 9.39151e-07 | 0.999995 | 9.39151e-07 | 0.999995 |
| rad12                         | 6.21410e-07 | 0.999995 | 6.21410e-07 | 0.999995 |
| rad39                         | 5.90009e-07 | 0.999996 | 5.90009e-07 | 0.999996 |
| PAH3+H                        | 5.39733e-07 | 0.999997 | 5.39733e-07 | 0.999997 |
| rad28                         | 5.15146e-07 | 0.999997 | 5.15146e-07 | 0.999997 |
| rad11                         | 5.14898e-07 | 0.999998 | 5.14899e-07 | 0.999998 |
| rad7                          | 3.94377e-07 | 0.999998 | 3.94377e-07 | 0.999998 |
| rad36                         | 2.87380e-07 | 0.999998 | 2.87380e-07 | 0.999998 |
| rad46                         | 2.26210e-07 | 0.999998 | 2.26210e-07 | 0.999998 |
| rad50                         | 1.94323e-07 | 0.999999 | 1.94323e-07 | 0.999999 |
| rad19syn                      | 1.52861e-07 | 0.999999 | 1.52861e-07 | 0.999999 |
| rad22                         | 1.43795e-07 | 0.999999 | 1.43795e-07 | 0.999999 |
| rad3                          | 1.16515e-07 | 0.999999 | 1.16515e-07 | 0.999999 |
| rad4                          | 7.22948e-08 | 0.999999 | 7.22948e-08 | 0.999999 |
| rad60syn                      | 6.13591e-08 | 0.999999 | 6.13591e-08 | 0.999999 |
| rad59                         | 5.71126e-08 | 0.999999 | 5.71126e-08 | 0.999999 |
| rad51                         | 5.47824e-08 | 0.999999 | 5.47824e-08 | 0.999999 |
| PAH1+H                        | 4.30878e-08 | 0.999999 | 4.30878e-08 | 0.999999 |
| Phenyl+cycC3H4                | 4.28057e-08 | 0.999999 | 0.00000     | 0.999999 |
| rad60anti                     | 3.72444e-08 | 0.999999 | 3.72444e-08 | 0.999999 |
| rad54                         | 3.64545e-08 | 0.999999 | 3.64545e-08 | 0.999999 |
| rad43                         | 1.95612e-08 | 1.000000 | 1.95612e-08 | 0.999999 |
| rad52                         | 1.65633e-08 | 1.000000 | 1.65633e-08 | 0.999999 |
| rad70                         | 1.30040e-08 | 1.000000 | 1.30040e-08 | 0.999999 |
| rad5                          | 3.89659e-09 | 1.000000 | 3.89659e-09 | 1.000000 |
| rad58                         | 3.84154e-09 | 1.000000 | 3.84154e-09 | 1.000000 |
| rad13                         | 3.46684e-09 | 1.000000 | 3.46684e-09 | 1.000000 |
| rad34                         | 2.80858e-09 | 1.000000 | 2.80858e-09 | 1.000000 |
| rad61                         | 2.79366e-09 | 1.000000 | 2.79366e-09 | 1.000000 |
| rad18                         | 2.62082e-09 | 1.000000 | 2.62082e-09 | 1.000000 |
| rad55                         | 2.38602e-09 | 1.000000 | 2.38602e-09 | 1.000000 |
| rad71                         | 1.63699e-09 | 1.000000 | 1.63699e-09 | 1.000000 |
| rad65                         | 1.48546e-09 | 1.000000 | 1.48546e-09 | 1.000000 |
| rad62                         | 1.47843e-09 | 1.000000 | 1.47843e-09 | 1.000000 |
| rad73                         | 1.21642e-09 | 1.000000 | 1.21642e-09 | 1.000000 |
| rad41                         | 8.83996e-10 | 1.000000 | 8.83996e-10 | 1.000000 |
| rad20                         | 8.82448e-10 | 1.000000 | 8.82447e-10 | 1.000000 |
| rad21                         | 7.31051e-10 | 1.000000 | 7.31051e-10 | 1.000000 |
| PAH8+H                        | 5.58695e-10 | 1.000000 | 5.58695e-10 | 1.000000 |
| rad53                         | 4.35249e-10 | 1.000000 | 4.35249e-10 | 1.000000 |
| rad56                         | 3.80609e-10 | 1.000000 | 3.80610e-10 | 1.000000 |

|           |             |          |             |          |
|-----------|-------------|----------|-------------|----------|
| rad64     | 1.82122e-10 | 1.000000 | 1.82122e-10 | 1.000000 |
| rad68syn  | 1.36303e-10 | 1.000000 | 1.36303e-10 | 1.000000 |
| rad27     | 1.14277e-10 | 1.000000 | 1.14277e-10 | 1.000000 |
| rad40syn  | 9.39518e-11 | 1.000000 | 9.39518e-11 | 1.000000 |
| rad68anti | 8.91407e-11 | 1.000000 | 8.91407e-11 | 1.000000 |
| rad42     | 7.46966e-11 | 1.000000 | 7.46966e-11 | 1.000000 |
| rad40anti | 7.42241e-11 | 1.000000 | 7.42241e-11 | 1.000000 |
| rad14     | 5.79746e-11 | 1.000000 | 5.79746e-11 | 1.000000 |
| rad31     | 5.26340e-11 | 1.000000 | 5.26340e-11 | 1.000000 |
| rad72     | 5.10458e-11 | 1.000000 | 5.10458e-11 | 1.000000 |
| rad25     | 3.52466e-11 | 1.000000 | 3.52466e-11 | 1.000000 |
| rad33     | 1.27555e-11 | 1.000000 | 1.27555e-11 | 1.000000 |
| rad47     | 2.62183e-12 | 1.000000 | 2.62183e-12 | 1.000000 |
| rad24     | 1.67260e-12 | 1.000000 | 1.67260e-12 | 1.000000 |
| rad8      | 7.45264e-18 | 1.000000 | 7.45264e-18 | 1.000000 |

100000.000 Pa, 700.000000 K

| Rate constant             | True (fraction)        | Effective (fraction)   |
|---------------------------|------------------------|------------------------|
| Total                     | 6.91694e-13 (1.00 )    | 6.91693e-13 (1.00 )    |
| Formation of rad19        | 6.47922e-13 (0.937 )   | 6.47922e-13 (0.937 )   |
| H-abstraction to cyc2enyl | 3.91858e-14 (0.0567 )  | 3.91858e-14 (0.0567 )  |
| H-abstraction to cyclenyl | 4.58543e-15 (0.00663 ) | 4.58542e-15 (0.00663 ) |

| species                       | PYtrue      | Cumul    | PYeffective | Cumul    |
|-------------------------------|-------------|----------|-------------|----------|
| Indene+H                      | 0.469524    | 0.469524 | 0.469524    | 0.469524 |
| rad9                          | 0.417838    | 0.887362 | 0.417838    | 0.887362 |
| Benzene+cycloprop-2-enylidene | 0.0566520   | 0.944014 | 0.0566520   | 0.944014 |
| PhCHCCH2+H                    | 0.0413165   | 0.985331 | 0.0413165   | 0.985331 |
| Benzene+cycloprop-1-enylidene | 0.00662927  | 0.991960 | 0.00662927  | 0.991960 |
| Ph+MeAc                       | 0.00135084  | 0.993311 | 0.00135084  | 0.993311 |
| C2H2+PhCH2                    | 0.00126079  | 0.994571 | 0.00126079  | 0.994571 |
| Ph+Allene                     | 0.00105914  | 0.995631 | 0.00105914  | 0.995631 |
| rad15                         | 0.000966656 | 0.996597 | 0.000966656 | 0.996597 |
| PhCH2CCH+H                    | 0.000667747 | 0.997265 | 0.000667747 | 0.997265 |
| PhCCCH3+H                     | 0.000585318 | 0.997850 | 0.000585318 | 0.997850 |
| rad67                         | 0.000491555 | 0.998342 | 0.000491555 | 0.998342 |
| rad6                          | 0.000470736 | 0.998813 | 0.000470736 | 0.998813 |
| PhCCH+CH3                     | 0.000344155 | 0.999157 | 0.000344155 | 0.999157 |
| rad35                         | 0.000177808 | 0.999335 | 0.000177808 | 0.999335 |
| PhcycC3H3_B+H                 | 0.000176896 | 0.999511 | 0.000176896 | 0.999512 |
| PhcycC3H3_A+H                 | 0.000165514 | 0.999677 | 0.000165514 | 0.999677 |
| rad19anti                     | 0.000106537 | 0.999784 | 0.000106537 | 0.999784 |
| PAH10+CH3                     | 3.62431e-05 | 0.999820 | 3.62431e-05 | 0.999820 |
| rad37                         | 3.25846e-05 | 0.999852 | 3.25846e-05 | 0.999852 |
| PAH7+H                        | 2.85102e-05 | 0.999881 | 2.85103e-05 | 0.999881 |
| rad2                          | 1.74276e-05 | 0.999898 | 1.74276e-05 | 0.999898 |
| PAH9+H                        | 1.46345e-05 | 0.999913 | 1.46345e-05 | 0.999913 |
| rad45                         | 1.32633e-05 | 0.999926 | 1.32633e-05 | 0.999926 |
| rad26                         | 1.16681e-05 | 0.999938 | 1.16681e-05 | 0.999938 |
| rad23                         | 1.12360e-05 | 0.999949 | 1.12360e-05 | 0.999949 |
| rad38                         | 1.08823e-05 | 0.999960 | 1.08823e-05 | 0.999960 |
| rad30                         | 6.56020e-06 | 0.999967 | 6.56020e-06 | 0.999967 |
| PAH3+H                        | 5.94809e-06 | 0.999973 | 5.94809e-06 | 0.999973 |
| rad39                         | 5.26101e-06 | 0.999978 | 5.26102e-06 | 0.999978 |
| rad1                          | 3.16043e-06 | 0.999981 | 3.16043e-06 | 0.999981 |
| rad12                         | 2.84728e-06 | 0.999984 | 2.84728e-06 | 0.999984 |
| rad50                         | 2.37186e-06 | 0.999986 | 2.37187e-06 | 0.999986 |
| rad46                         | 2.36760e-06 | 0.999989 | 2.36760e-06 | 0.999989 |
| rad10                         | 1.58209e-06 | 0.999990 | 1.58209e-06 | 0.999990 |
| rad28                         | 1.31265e-06 | 0.999991 | 1.31265e-06 | 0.999991 |
| rad36                         | 1.03210e-06 | 0.999992 | 1.03210e-06 | 0.999992 |
| rad7                          | 8.90073e-07 | 0.999993 | 8.90074e-07 | 0.999993 |
| rad19syn                      | 8.89060e-07 | 0.999994 | 8.89061e-07 | 0.999994 |
| rad11                         | 7.76526e-07 | 0.999995 | 7.76526e-07 | 0.999995 |
| rad51                         | 7.29396e-07 | 0.999996 | 7.29397e-07 | 0.999996 |
| rad59                         | 5.98738e-07 | 0.999996 | 5.98737e-07 | 0.999996 |
| PAH1+H                        | 5.60842e-07 | 0.999997 | 5.60842e-07 | 0.999997 |
| rad60syn                      | 5.55831e-07 | 0.999997 | 5.55831e-07 | 0.999997 |
| Phenyl+cycC3H4                | 4.78675e-07 | 0.999998 | 0.00000     | 0.999997 |
| rad54                         | 4.22846e-07 | 0.999998 | 4.22846e-07 | 0.999998 |
| rad60anti                     | 3.42644e-07 | 0.999999 | 3.42644e-07 | 0.999998 |
| rad52                         | 2.10968e-07 | 0.999999 | 2.10968e-07 | 0.999998 |
| rad43                         | 1.86590e-07 | 0.999999 | 1.86590e-07 | 0.999999 |
| rad22                         | 1.63948e-07 | 0.999999 | 1.63948e-07 | 0.999999 |
| rad70                         | 1.52375e-07 | 0.999999 | 1.52375e-07 | 0.999999 |
| rad3                          | 1.48632e-07 | 1.000000 | 1.48632e-07 | 0.999999 |
| rad4                          | 1.01521e-07 | 1.000000 | 1.01521e-07 | 0.999999 |



|           |             |          |             |          |
|-----------|-------------|----------|-------------|----------|
| rad58     | 5.11293e-08 | 1.000000 | 5.11293e-08 | 0.999999 |
| rad61     | 4.04219e-08 | 1.000000 | 4.04219e-08 | 0.999999 |
| rad34     | 3.54511e-08 | 1.000000 | 3.54511e-08 | 0.999999 |
| rad55     | 2.90050e-08 | 1.000000 | 2.90050e-08 | 0.999999 |
| rad71     | 2.66211e-08 | 1.000000 | 2.66211e-08 | 0.999999 |
| rad65     | 1.95973e-08 | 1.000000 | 1.95973e-08 | 0.999999 |
| rad73     | 1.90456e-08 | 1.000000 | 1.90456e-08 | 0.999999 |
| rad62     | 1.33874e-08 | 1.000000 | 1.33874e-08 | 0.999999 |
| rad41     | 1.07862e-08 | 1.000000 | 1.07862e-08 | 0.999999 |
| rad13     | 9.93709e-09 | 1.000000 | 9.93709e-09 | 0.999999 |
| PAH8+H    | 9.15246e-09 | 1.000000 | 9.15246e-09 | 0.999999 |
| rad53     | 6.13316e-09 | 1.000000 | 6.13316e-09 | 0.999999 |
| rad56     | 5.67089e-09 | 1.000000 | 5.67089e-09 | 0.999999 |
| rad18     | 2.75869e-09 | 1.000000 | 2.75869e-09 | 0.999999 |
| rad64     | 2.57043e-09 | 1.000000 | 2.57044e-09 | 0.999999 |
| rad5      | 2.40737e-09 | 1.000000 | 2.40737e-09 | 0.999999 |
| rad68syn  | 2.05385e-09 | 1.000000 | 2.05385e-09 | 0.999999 |
| rad20     | 2.03381e-09 | 1.000000 | 2.03381e-09 | 0.999999 |
| rad21     | 1.88514e-09 | 1.000000 | 1.88514e-09 | 0.999999 |
| rad40syn  | 1.49301e-09 | 1.000000 | 1.49301e-09 | 0.999999 |
| rad68anti | 1.34087e-09 | 1.000000 | 1.34087e-09 | 0.999999 |
| rad40anti | 1.18589e-09 | 1.000000 | 1.18589e-09 | 0.999999 |
| rad72     | 8.91073e-10 | 1.000000 | 8.91073e-10 | 0.999999 |
| rad42     | 8.45189e-10 | 1.000000 | 8.45189e-10 | 0.999999 |
| rad31     | 6.37091e-10 | 1.000000 | 6.37090e-10 | 0.999999 |
| rad47     | 3.20596e-10 | 1.000000 | 3.20597e-10 | 0.999999 |
| rad27     | 1.49811e-10 | 1.000000 | 1.49811e-10 | 0.999999 |
| rad25     | 6.62124e-11 | 1.000000 | 6.62124e-11 | 0.999999 |
| rad14     | 6.59217e-11 | 1.000000 | 6.59218e-11 | 0.999999 |
| rad33     | 6.57290e-11 | 1.000000 | 6.57290e-11 | 0.999999 |
| rad24     | 2.39650e-11 | 1.000000 | 2.39650e-11 | 0.999999 |
| rad8      | 3.10692e-15 | 1.000000 | 3.10693e-15 | 0.999999 |

100000.000 Pa, 800.000000 K

| Rate constant             | True (fraction)       | Effective (fraction)  |
|---------------------------|-----------------------|-----------------------|
| Total                     | 1.03759e-12 (1.00 )   | 1.03758e-12 (1.00 )   |
| Formation of rad19        | 9.41065e-13 (0.907 )  | 9.41062e-13 (0.907 )  |
| H-abstraction to cyc2enyl | 8.32953e-14 (0.0803 ) | 8.32953e-14 (0.0803 ) |
| H-abstraction to cyclenyl | 1.32261e-14 (0.0127 ) | 1.32261e-14 (0.0127 ) |

| species                       | PYtrue      | Cumul    | PYeffective | Cumul    |
|-------------------------------|-------------|----------|-------------|----------|
| Indene+H                      | 0.518200    | 0.518200 | 0.518201    | 0.518201 |
| rad9                          | 0.266962    | 0.785162 | 0.266963    | 0.785164 |
| PhCHCCH2+H                    | 0.103138    | 0.888300 | 0.103138    | 0.888301 |
| Benzene+cycloprop-2-enylidene | 0.0802780   | 0.968577 | 0.0802781   | 0.968579 |
| Benzene+cycloprop-1-enylidene | 0.0127470   | 0.981324 | 0.0127470   | 0.981326 |
| Ph+MeAc                       | 0.00354376  | 0.984868 | 0.00354377  | 0.984870 |
| C2H2+PhCH2                    | 0.00336045  | 0.988229 | 0.00336046  | 0.988231 |
| Ph+Allene                     | 0.00325812  | 0.991487 | 0.00325813  | 0.991489 |
| PhCH2CCH+H                    | 0.00224626  | 0.993733 | 0.00224626  | 0.993735 |
| PhCCCH3+H                     | 0.00141602  | 0.995149 | 0.00141602  | 0.995151 |
| rad67                         | 0.00134804  | 0.996497 | 0.00134804  | 0.996499 |
| PhCCH+CH3                     | 0.000883041 | 0.997380 | 0.000883043 | 0.997382 |
| rad35                         | 0.000487091 | 0.997867 | 0.000487092 | 0.997869 |
| PhcycC3H3_B+H                 | 0.000398604 | 0.998266 | 0.000398605 | 0.998268 |
| rad6                          | 0.000376188 | 0.998642 | 0.000376189 | 0.998644 |
| PhcycC3H3_A+H                 | 0.000369583 | 0.999012 | 0.000369584 | 0.999013 |
| rad15                         | 0.000322204 | 0.999334 | 0.000322205 | 0.999336 |
| PAH10+CH3                     | 0.000148313 | 0.999482 | 0.000148314 | 0.999484 |
| rad37                         | 9.52278e-05 | 0.999577 | 9.52278e-05 | 0.999579 |
| PAH7+H                        | 8.35537e-05 | 0.999661 | 8.35539e-05 | 0.999663 |
| rad19anti                     | 7.31249e-05 | 0.999734 | 7.31249e-05 | 0.999736 |
| PAH9+H                        | 4.70806e-05 | 0.999781 | 4.70808e-05 | 0.999783 |
| rad38                         | 3.65710e-05 | 0.999818 | 3.65710e-05 | 0.999820 |
| PAH3+H                        | 2.59766e-05 | 0.999844 | 2.59767e-05 | 0.999846 |
| rad45                         | 2.31953e-05 | 0.999867 | 2.31954e-05 | 0.999869 |
| rad30                         | 1.98260e-05 | 0.999887 | 1.98260e-05 | 0.999889 |
| rad12                         | 1.73205e-05 | 0.999904 | 1.73205e-05 | 0.999906 |
| rad23                         | 1.71471e-05 | 0.999921 | 1.71471e-05 | 0.999923 |
| rad39                         | 1.47319e-05 | 0.999936 | 1.47319e-05 | 0.999938 |
| rad2                          | 1.30724e-05 | 0.999949 | 1.30725e-05 | 0.999951 |
| rad50                         | 8.15294e-06 | 0.999957 | 8.15296e-06 | 0.999959 |
| rad46                         | 7.74100e-06 | 0.999965 | 7.74101e-06 | 0.999967 |
| rad26                         | 6.49293e-06 | 0.999971 | 6.49293e-06 | 0.999973 |
| rad1                          | 2.90837e-06 | 0.999974 | 2.90838e-06 | 0.999976 |
| PAH1+H                        | 2.63859e-06 | 0.999977 | 2.63859e-06 | 0.999979 |
| rad51                         | 2.56668e-06 | 0.999979 | 2.56668e-06 | 0.999981 |

|                |             |          |             |          |
|----------------|-------------|----------|-------------|----------|
| rad59          | 2.50340e-06 | 0.999982 | 2.50340e-06 | 0.999984 |
| rad36          | 2.26939e-06 | 0.999984 | 2.26939e-06 | 0.999986 |
| Phenyl+cycC3H4 | 2.07710e-06 | 0.999986 | 0.00000     | 0.999986 |
| rad60syn       | 2.06853e-06 | 0.999988 | 2.06854e-06 | 0.999988 |
| rad54          | 1.61684e-06 | 0.999990 | 1.61684e-06 | 0.999990 |
| rad19syn       | 1.44497e-06 | 0.999991 | 1.44497e-06 | 0.999991 |
| rad60anti      | 1.29098e-06 | 0.999993 | 1.29099e-06 | 0.999993 |
| rad28          | 1.08027e-06 | 0.999994 | 1.08027e-06 | 0.999994 |
| rad10          | 9.30937e-07 | 0.999995 | 9.30937e-07 | 0.999995 |
| rad7           | 7.47178e-07 | 0.999996 | 7.47179e-07 | 0.999995 |
| rad52          | 7.33607e-07 | 0.999996 | 7.33608e-07 | 0.999996 |
| rad43          | 7.07083e-07 | 0.999997 | 7.07084e-07 | 0.999997 |
| rad70          | 6.58619e-07 | 0.999998 | 6.58621e-07 | 0.999997 |
| rad11          | 6.38728e-07 | 0.999998 | 6.38730e-07 | 0.999998 |
| rad58          | 2.61247e-07 | 0.999999 | 2.61247e-07 | 0.999998 |
| rad61          | 2.19411e-07 | 0.999999 | 2.19411e-07 | 0.999998 |
| rad34          | 1.64915e-07 | 0.999999 | 1.64916e-07 | 0.999999 |
| rad22          | 1.53556e-07 | 0.999999 | 1.53556e-07 | 0.999999 |
| rad55          | 1.17502e-07 | 0.999999 | 1.17503e-07 | 0.999999 |
| rad3           | 9.93773e-08 | 0.999999 | 9.93772e-08 | 0.999999 |
| rad71          | 9.78191e-08 | 0.999999 | 9.78191e-08 | 0.999999 |
| rad4           | 7.47822e-08 | 0.999999 | 7.47823e-08 | 0.999999 |
| rad65          | 6.98784e-08 | 1.000000 | 6.98786e-08 | 0.999999 |
| rad73          | 6.94986e-08 | 1.000000 | 6.94987e-08 | 0.999999 |
| PAH8+H         | 5.47852e-08 | 1.000000 | 5.47853e-08 | 0.999999 |
| rad41          | 4.98696e-08 | 1.000000 | 4.98697e-08 | 0.999999 |
| rad62          | 4.63415e-08 | 1.000000 | 4.63416e-08 | 0.999999 |
| rad56          | 3.04228e-08 | 1.000000 | 3.04227e-08 | 1.000000 |
| rad53          | 3.03219e-08 | 1.000000 | 3.03220e-08 | 1.000000 |
| rad13          | 1.42768e-08 | 1.000000 | 1.42769e-08 | 1.000000 |
| rad64          | 1.19495e-08 | 1.000000 | 1.19495e-08 | 1.000000 |
| rad68syn       | 1.14358e-08 | 1.000000 | 1.14358e-08 | 1.000000 |
| rad40syn       | 8.69330e-09 | 1.000000 | 8.69332e-09 | 1.000000 |
| rad68anti      | 7.45256e-09 | 1.000000 | 7.45257e-09 | 1.000000 |
| rad40anti      | 6.92587e-09 | 1.000000 | 6.92589e-09 | 1.000000 |
| rad21          | 5.13414e-09 | 1.000000 | 5.13415e-09 | 1.000000 |
| rad20          | 4.77404e-09 | 1.000000 | 4.77404e-09 | 1.000000 |
| rad42          | 3.51271e-09 | 1.000000 | 3.51272e-09 | 1.000000 |
| rad72          | 3.31313e-09 | 1.000000 | 3.31314e-09 | 1.000000 |
| rad18          | 2.80167e-09 | 1.000000 | 2.80168e-09 | 1.000000 |
| rad47          | 2.47656e-09 | 1.000000 | 2.47657e-09 | 1.000000 |
| rad31          | 1.93231e-09 | 1.000000 | 1.93231e-09 | 1.000000 |
| rad5           | 9.78009e-10 | 1.000000 | 9.78009e-10 | 1.000000 |
| rad24          | 4.46534e-10 | 1.000000 | 4.46535e-10 | 1.000000 |
| rad33          | 2.29275e-10 | 1.000000 | 2.29275e-10 | 1.000000 |
| rad27          | 1.66933e-10 | 1.000000 | 1.66933e-10 | 1.000000 |
| rad25          | 9.63933e-11 | 1.000000 | 9.63933e-11 | 1.000000 |
| rad14          | 5.39822e-11 | 1.000000 | 5.39823e-11 | 1.000000 |
| rad8           | 6.65841e-12 | 1.000000 | 6.65842e-12 | 1.000000 |

100000.000 Pa, 900.000000 K

=====

| Rate constant             | True (fraction)       | Effective (fraction)  |
|---------------------------|-----------------------|-----------------------|
| Total                     | 1.49199e-12 (1.00 )   | 1.49198e-12 (1.00 )   |
| Formation of rad19        | 1.30395e-12 (0.874 )  | 1.30394e-12 (0.874 )  |
| H-abstraction to cyc2enyl | 1.56554e-13 (0.105 )  | 1.56554e-13 (0.105 )  |
| H-abstraction to cyclenyl | 3.14892e-14 (0.0211 ) | 3.14890e-14 (0.0211 ) |

| species                       | PYtrue      | Cumul    | PYeffective | Cumul    |
|-------------------------------|-------------|----------|-------------|----------|
| Indene+H                      | 0.485180    | 0.485180 | 0.485183    | 0.485183 |
| rad9                          | 0.178145    | 0.663325 | 0.178146    | 0.663329 |
| PhCHCCH2+H                    | 0.177486    | 0.840810 | 0.177487    | 0.840817 |
| Benzene+cycloprop-2-enylidene | 0.104929    | 0.945740 | 0.104930    | 0.945747 |
| Benzene+cycloprop-1-enylidene | 0.0211054   | 0.966845 | 0.0211054   | 0.966852 |
| Ph+MeAc                       | 0.00626542  | 0.973111 | 0.00626546  | 0.973118 |
| Ph+Allene                     | 0.00606610  | 0.979177 | 0.00606614  | 0.979184 |
| C2H2+PhCH2                    | 0.00600809  | 0.985185 | 0.00600813  | 0.985192 |
| PhCH2CCH+H                    | 0.00463192  | 0.989817 | 0.00463195  | 0.989824 |
| rad67                         | 0.00246644  | 0.992283 | 0.00246646  | 0.992290 |
| PhCCCH3+H                     | 0.00234786  | 0.994631 | 0.00234788  | 0.994638 |
| PhCCH+CH3                     | 0.00158559  | 0.996217 | 0.00158561  | 0.996224 |
| rad35                         | 0.000892650 | 0.997109 | 0.000892659 | 0.997117 |
| PhcycC3H3_B+H                 | 0.000674337 | 0.997784 | 0.000674341 | 0.997791 |
| PhcycC3H3_A+H                 | 0.000616755 | 0.998400 | 0.000616759 | 0.998408 |
| PAH10+CH3                     | 0.000352879 | 0.998753 | 0.000352882 | 0.998761 |
| rad6                          | 0.000210829 | 0.998964 | 0.000210830 | 0.998971 |
| rad37                         | 0.000173359 | 0.999138 | 0.000173360 | 0.999145 |
| PAH7+H                        | 0.000150177 | 0.999288 | 0.000150178 | 0.999295 |

|                |             |          |             |          |
|----------------|-------------|----------|-------------|----------|
| rad15          | 0.000130188 | 0.999418 | 0.000130189 | 0.999425 |
| PAH9+H         | 9.73588e-05 | 0.999515 | 9.73588e-05 | 0.999522 |
| rad38          | 7.66709e-05 | 0.999592 | 7.66714e-05 | 0.999599 |
| PAH3+H         | 6.82076e-05 | 0.999660 | 6.82080e-05 | 0.999667 |
| rad12          | 6.71115e-05 | 0.999727 | 6.71119e-05 | 0.999734 |
| rad19anti      | 5.20698e-05 | 0.999779 | 5.20702e-05 | 0.999787 |
| rad30          | 3.90110e-05 | 0.999818 | 3.90112e-05 | 0.999826 |
| rad45          | 3.40772e-05 | 0.999852 | 3.40774e-05 | 0.999860 |
| rad39          | 2.57658e-05 | 0.999878 | 2.57660e-05 | 0.999885 |
| rad23          | 2.09393e-05 | 0.999899 | 2.09394e-05 | 0.999906 |
| rad50          | 1.80188e-05 | 0.999917 | 1.80190e-05 | 0.999924 |
| rad46          | 1.62400e-05 | 0.999933 | 1.62401e-05 | 0.999941 |
| rad2           | 8.42150e-06 | 0.999942 | 8.42155e-06 | 0.999949 |
| PAH1+H         | 7.13321e-06 | 0.999949 | 7.13325e-06 | 0.999956 |
| rad59          | 6.32542e-06 | 0.999955 | 6.32547e-06 | 0.999962 |
| Phenyl+cycC3H4 | 6.19965e-06 | 0.999961 | 0.00000     | 0.999962 |
| rad51          | 5.83470e-06 | 0.999967 | 5.83474e-06 | 0.999968 |
| rad60syn       | 4.77080e-06 | 0.999972 | 4.77083e-06 | 0.999973 |
| rad36          | 3.47569e-06 | 0.999975 | 3.47571e-06 | 0.999977 |
| rad54          | 3.42784e-06 | 0.999979 | 3.42786e-06 | 0.999980 |
| rad26          | 3.08039e-06 | 0.999982 | 3.08041e-06 | 0.999983 |
| rad60anti      | 3.00606e-06 | 0.999985 | 3.00609e-06 | 0.999986 |
| rad1           | 2.28841e-06 | 0.999987 | 2.28842e-06 | 0.999988 |
| rad70          | 1.66217e-06 | 0.999989 | 1.66218e-06 | 0.999990 |
| rad52          | 1.64335e-06 | 0.999991 | 1.64337e-06 | 0.999992 |
| rad43          | 1.62915e-06 | 0.999992 | 1.62916e-06 | 0.999993 |
| rad19syn       | 1.51771e-06 | 0.999994 | 1.51772e-06 | 0.999995 |
| rad58          | 7.89040e-07 | 0.999995 | 7.89045e-07 | 0.999996 |
| rad61          | 6.75920e-07 | 0.999995 | 6.75925e-07 | 0.999996 |
| rad28          | 6.07649e-07 | 0.999996 | 6.07653e-07 | 0.999997 |
| rad10          | 5.25083e-07 | 0.999996 | 5.25087e-07 | 0.999997 |
| rad7           | 4.74143e-07 | 0.999997 | 4.74146e-07 | 0.999998 |
| rad11          | 4.66013e-07 | 0.999997 | 4.66016e-07 | 0.999998 |
| rad34          | 4.45093e-07 | 0.999998 | 4.45096e-07 | 0.999999 |
| rad55          | 2.62093e-07 | 0.999998 | 2.62094e-07 | 0.999999 |
| rad71          | 2.36969e-07 | 0.999998 | 2.36970e-07 | 0.999999 |
| PAH8+H         | 2.01163e-07 | 0.999998 | 2.01165e-07 | 0.999999 |
| rad22          | 1.66804e-07 | 0.999999 | 1.66806e-07 | 1.000000 |
| rad73          | 1.66462e-07 | 0.999999 | 1.66463e-07 | 1.000000 |
| rad65          | 1.61719e-07 | 0.999999 | 1.61719e-07 | 1.000000 |
| rad41          | 1.35151e-07 | 0.999999 | 1.35152e-07 | 1.000000 |
| rad62          | 9.84303e-08 | 0.999999 | 9.84311e-08 | 1.000000 |
| rad56          | 8.95657e-08 | 0.999999 | 8.95665e-08 | 1.000000 |
| rad53          | 8.17982e-08 | 0.999999 | 8.17986e-08 | 1.000000 |
| rad3           | 6.64303e-08 | 0.999999 | 6.64307e-08 | 1.000000 |
| rad4           | 5.25846e-08 | 0.999999 | 5.25850e-08 | 1.000000 |
| rad68syn       | 3.74020e-08 | 0.999999 | 3.74023e-08 | 1.000000 |
| rad64          | 3.21990e-08 | 1.000000 | 3.21992e-08 | 1.000000 |
| rad40syn       | 3.03016e-08 | 1.000000 | 3.03018e-08 | 1.000000 |
| rad68anti      | 2.43164e-08 | 1.000000 | 2.43166e-08 | 1.000000 |
| rad40anti      | 2.42607e-08 | 1.000000 | 2.42608e-08 | 1.000000 |
| rad21          | 2.28943e-08 | 1.000000 | 2.28945e-08 | 1.000000 |
| rad13          | 2.16422e-08 | 1.000000 | 2.16423e-08 | 1.000000 |
| rad20          | 1.68441e-08 | 1.000000 | 1.68442e-08 | 1.000000 |
| rad42          | 8.65478e-09 | 1.000000 | 8.65484e-09 | 1.000000 |
| rad72          | 8.18662e-09 | 1.000000 | 8.18668e-09 | 1.000000 |
| rad24          | 7.94082e-09 | 1.000000 | 7.94087e-09 | 1.000000 |
| rad47          | 6.80266e-09 | 1.000000 | 6.80270e-09 | 1.000000 |
| rad18          | 4.38636e-09 | 1.000000 | 4.38639e-09 | 1.000000 |
| rad8           | 3.16513e-09 | 1.000000 | 3.16515e-09 | 1.000000 |
| rad31          | 3.04634e-09 | 1.000000 | 3.04635e-09 | 1.000000 |
| rad33          | 1.01001e-09 | 1.000000 | 1.01001e-09 | 1.000000 |
| rad5           | 3.93120e-10 | 1.000000 | 3.93123e-10 | 1.000000 |
| rad27          | 2.61663e-10 | 1.000000 | 2.61665e-10 | 1.000000 |
| rad25          | 1.83469e-10 | 1.000000 | 1.83470e-10 | 1.000000 |
| rad14          | 6.15656e-11 | 1.000000 | 6.15660e-11 | 1.000000 |

100000.000 Pa, 1000.00000 K

| Rate constant             | True (fraction)       | Effective (fraction)  |
|---------------------------|-----------------------|-----------------------|
| Total                     | 2.07591e-12 (1.00 )   | 2.07587e-12 (1.00 )   |
| Formation of rad19        | 1.74189e-12 (0.839 )  | 1.74185e-12 (0.839 )  |
| H-abstraction to cyc2enyl | 2.68753e-13 (0.129 )  | 2.68753e-13 (0.129 )  |
| H-abstraction to cyc1enyl | 6.52627e-14 (0.0314 ) | 6.52614e-14 (0.0314 ) |

  

| species    | PYtrue   | Cumul    | PYeffective | Cumul    |
|------------|----------|----------|-------------|----------|
| Indene+H   | 0.453217 | 0.453217 | 0.453225    | 0.453225 |
| PhCHCCH2+H | 0.225733 | 0.678949 | 0.225737    | 0.678962 |

|                               |             |          |             |          |
|-------------------------------|-------------|----------|-------------|----------|
| Benzene+cycloprop-2-enylidene | 0.129463    | 0.808412 | 0.129465    | 0.808427 |
| rad9                          | 0.116965    | 0.925378 | 0.116968    | 0.925395 |
| Benzene+cycloprop-1-enylidene | 0.0314382   | 0.956816 | 0.0314381   | 0.956833 |
| Ph+MeAc                       | 0.00805945  | 0.964875 | 0.00805960  | 0.964892 |
| Ph+Allene                     | 0.00789537  | 0.972771 | 0.00789553  | 0.972788 |
| C2H2+PhCH2                    | 0.00777208  | 0.980543 | 0.00777223  | 0.980560 |
| PhCH2CCH+H                    | 0.00635116  | 0.986894 | 0.00635128  | 0.986911 |
| rad67                         | 0.00321967  | 0.990114 | 0.00321973  | 0.990131 |
| PhCCCH3+H                     | 0.00292517  | 0.993039 | 0.00292523  | 0.993056 |
| PhCCH+CH3                     | 0.00207426  | 0.995113 | 0.00207430  | 0.995131 |
| rad35                         | 0.00116705  | 0.996280 | 0.00116707  | 0.996298 |
| PhcycC3H3_B+H                 | 0.000915608 | 0.997196 | 0.000915622 | 0.997213 |
| PhcycC3H3_A+H                 | 0.000832781 | 0.998028 | 0.000832796 | 0.998046 |
| PAH10+CH3                     | 0.000512477 | 0.998541 | 0.000512487 | 0.998559 |
| rad37                         | 0.000222903 | 0.998764 | 0.000222908 | 0.998781 |
| PAH7+H                        | 0.000193925 | 0.998958 | 0.000193929 | 0.998975 |
| rad12                         | 0.000148922 | 0.999107 | 0.000148925 | 0.999124 |
| rad6                          | 0.000137259 | 0.999244 | 0.000137262 | 0.999262 |
| PAH9+H                        | 0.000136429 | 0.999380 | 0.000136432 | 0.999398 |
| rad38                         | 0.000107010 | 0.999487 | 0.000107012 | 0.999505 |
| PAH3+H                        | 0.000104225 | 0.999592 | 0.000104228 | 0.999609 |
| rad15                         | 7.92289e-05 | 0.999671 | 7.92303e-05 | 0.999688 |
| rad30                         | 5.26120e-05 | 0.999723 | 5.26129e-05 | 0.999741 |
| rad45                         | 3.97791e-05 | 0.999763 | 3.97799e-05 | 0.999781 |
| rad19anti                     | 3.82157e-05 | 0.999801 | 3.82165e-05 | 0.999819 |
| rad39                         | 3.32125e-05 | 0.999835 | 3.32130e-05 | 0.999852 |
| rad50                         | 2.64094e-05 | 0.999861 | 2.64099e-05 | 0.999879 |
| rad46                         | 2.30190e-05 | 0.999884 | 2.30194e-05 | 0.999902 |
| rad23                         | 2.14995e-05 | 0.999906 | 2.14999e-05 | 0.999923 |
| Phenyl+cycC3H4                | 1.79691e-05 | 0.999924 | 0.00000     | 0.999923 |
| PAH1+H                        | 1.09849e-05 | 0.999934 | 1.09851e-05 | 0.999934 |
| rad59                         | 9.50674e-06 | 0.999944 | 9.50688e-06 | 0.999944 |
| rad51                         | 8.72117e-06 | 0.999953 | 8.72132e-06 | 0.999952 |
| rad60syn                      | 6.89881e-06 | 0.999960 | 6.89894e-06 | 0.999959 |
| rad2                          | 6.73623e-06 | 0.999966 | 6.73636e-06 | 0.999966 |
| rad54                         | 4.68977e-06 | 0.999971 | 4.68986e-06 | 0.999971 |
| rad60anti                     | 4.36474e-06 | 0.999975 | 4.36482e-06 | 0.999975 |
| rad36                         | 3.96576e-06 | 0.999979 | 3.96584e-06 | 0.999979 |
| rad70                         | 2.48862e-06 | 0.999982 | 2.48868e-06 | 0.999982 |
| rad52                         | 2.43097e-06 | 0.999984 | 2.43102e-06 | 0.999984 |
| rad43                         | 2.34855e-06 | 0.999987 | 2.34859e-06 | 0.999986 |
| rad1                          | 1.95934e-06 | 0.999989 | 1.95937e-06 | 0.999988 |
| rad26                         | 1.83977e-06 | 0.999990 | 1.83981e-06 | 0.999990 |
| rad19syn                      | 1.42468e-06 | 0.999992 | 1.42471e-06 | 0.999992 |
| rad58                         | 1.27728e-06 | 0.999993 | 1.27731e-06 | 0.999993 |
| rad61                         | 1.09547e-06 | 0.999994 | 1.09549e-06 | 0.999994 |
| rad34                         | 6.85956e-07 | 0.999995 | 6.85969e-07 | 0.999995 |
| rad11                         | 5.59206e-07 | 0.999995 | 5.59216e-07 | 0.999995 |
| rad10                         | 4.31642e-07 | 0.999996 | 4.31650e-07 | 0.999996 |
| rad7                          | 4.27886e-07 | 0.999996 | 4.27894e-07 | 0.999996 |
| rad28                         | 3.95889e-07 | 0.999997 | 3.95897e-07 | 0.999996 |
| rad71                         | 3.72690e-07 | 0.999997 | 3.72697e-07 | 0.999997 |
| rad55                         | 3.67148e-07 | 0.999997 | 3.67155e-07 | 0.999997 |
| PAH8+H                        | 3.53052e-07 | 0.999998 | 3.53059e-07 | 0.999998 |
| rad22                         | 3.06250e-07 | 0.999998 | 3.06256e-07 | 0.999998 |
| rad73                         | 2.59152e-07 | 0.999998 | 2.59157e-07 | 0.999998 |
| rad65                         | 2.43206e-07 | 0.999999 | 2.43210e-07 | 0.999998 |
| rad41                         | 2.08879e-07 | 0.999999 | 2.08882e-07 | 0.999999 |
| rad21                         | 1.75070e-07 | 0.999999 | 1.75073e-07 | 0.999999 |
| rad8                          | 1.59257e-07 | 0.999999 | 1.59260e-07 | 0.999999 |
| rad56                         | 1.42043e-07 | 0.999999 | 1.42046e-07 | 0.999999 |
| rad62                         | 1.37259e-07 | 0.999999 | 1.37262e-07 | 0.999999 |
| rad53                         | 1.24893e-07 | 1.000000 | 1.24896e-07 | 0.999999 |
| rad20                         | 8.89612e-08 | 1.000000 | 8.89627e-08 | 0.999999 |
| rad24                         | 6.44670e-08 | 1.000000 | 6.44682e-08 | 0.999999 |
| rad68syn                      | 6.24903e-08 | 1.000000 | 6.24915e-08 | 1.000000 |
| rad13                         | 5.45910e-08 | 1.000000 | 5.45920e-08 | 1.000000 |
| rad3                          | 5.26414e-08 | 1.000000 | 5.26425e-08 | 1.000000 |
| rad40syn                      | 5.20346e-08 | 1.000000 | 5.20356e-08 | 1.000000 |
| rad64                         | 4.98622e-08 | 1.000000 | 4.98631e-08 | 1.000000 |
| rad40anti                     | 4.17574e-08 | 1.000000 | 4.17582e-08 | 1.000000 |
| rad4                          | 4.15413e-08 | 1.000000 | 4.15421e-08 | 1.000000 |
| rad68anti                     | 4.05866e-08 | 1.000000 | 4.05873e-08 | 1.000000 |
| rad18                         | 1.51873e-08 | 1.000000 | 1.51876e-08 | 1.000000 |
| rad72                         | 1.31280e-08 | 1.000000 | 1.31283e-08 | 1.000000 |
| rad42                         | 1.28870e-08 | 1.000000 | 1.28872e-08 | 1.000000 |
| rad47                         | 1.03681e-08 | 1.000000 | 1.03683e-08 | 1.000000 |
| rad33                         | 6.04654e-09 | 1.000000 | 6.04665e-09 | 1.000000 |
| rad31                         | 3.50863e-09 | 1.000000 | 3.50870e-09 | 1.000000 |
| rad25                         | 7.57827e-10 | 1.000000 | 7.57841e-10 | 1.000000 |

|       |             |         |             |          |
|-------|-------------|---------|-------------|----------|
| rad27 | 7.30446e-10 | 1.00000 | 7.30459e-10 | 1.000000 |
| rad5  | 2.18082e-10 | 1.00000 | 2.18085e-10 | 1.000000 |
| rad14 | 1.19575e-10 | 1.00000 | 1.19577e-10 | 1.000000 |

100000.000 Pa, 1100.00000 K

| Rate constant             | True (fraction)       | Effective (fraction)  |
|---------------------------|-----------------------|-----------------------|
| Total                     | 2.81236e-12 (1.00 )   | 2.81222e-12 (1.00 )   |
| Formation of rad19        | 2.25993e-12 (0.804 )  | 2.25979e-12 (0.804 )  |
| H-abstraction to cyc2enyl | 4.30538e-13 (0.153 )  | 4.30538e-13 (0.153 )  |
| H-abstraction to cyc1enyl | 1.21896e-13 (0.0433 ) | 1.21889e-13 (0.0433 ) |

| species                       | PYtrue      | Cumul    | PYeffective | Cumul    |
|-------------------------------|-------------|----------|-------------|----------|
| Indene+H                      | 0.427623    | 0.427623 | 0.427644    | 0.427644 |
| PhCHCCH2+H                    | 0.236969    | 0.664591 | 0.236981    | 0.664625 |
| Benzene+cycloprop-2-enylidene | 0.153088    | 0.817679 | 0.153096    | 0.817721 |
| rad9                          | 0.0930453   | 0.910724 | 0.0930501   | 0.910771 |
| Benzene+cycloprop-1-enylidene | 0.0433429   | 0.954067 | 0.0433425   | 0.954113 |
| Ph+MeAc                       | 0.00849260  | 0.962560 | 0.00849301  | 0.962606 |
| Ph+Allene                     | 0.00834057  | 0.970900 | 0.00834097  | 0.970947 |
| C2H2+PhCH2                    | 0.00820637  | 0.979107 | 0.00820678  | 0.979154 |
| PhCH2CCH+H                    | 0.00683550  | 0.985942 | 0.00683585  | 0.985990 |
| rad67                         | 0.00340892  | 0.989351 | 0.00340909  | 0.989399 |
| PhCCCH3+H                     | 0.00304709  | 0.992398 | 0.00304724  | 0.992446 |
| PhCCH+CH3                     | 0.00220460  | 0.994603 | 0.00220472  | 0.994651 |
| rad35                         | 0.00123658  | 0.995839 | 0.00123664  | 0.995888 |
| PhcycC3H3_B+H                 | 0.00103359  | 0.996873 | 0.00103364  | 0.996921 |
| PhcycC3H3_A+H                 | 0.000958056 | 0.997831 | 0.000958103 | 0.997879 |
| PAH10+CH3                     | 0.000562172 | 0.998393 | 0.000562200 | 0.998442 |
| rad37                         | 0.000234048 | 0.998627 | 0.000234060 | 0.998676 |
| rad12                         | 0.000222918 | 0.998850 | 0.000222930 | 0.998899 |
| PAH7+H                        | 0.000205026 | 0.999055 | 0.000205037 | 0.999104 |
| PAH9+H                        | 0.000148974 | 0.999204 | 0.000148982 | 0.999253 |
| PAH3+H                        | 0.000116675 | 0.999321 | 0.000116680 | 0.999369 |
| rad38                         | 0.000116321 | 0.999437 | 0.000116328 | 0.999486 |
| rad6                          | 0.000110430 | 0.999548 | 0.000110436 | 0.999596 |
| rad15                         | 8.44744e-05 | 0.999632 | 8.44785e-05 | 0.999681 |
| rad30                         | 5.63290e-05 | 0.999688 | 5.63319e-05 | 0.999737 |
| Phenyl+cycC3H4                | 4.85315e-05 | 0.999737 | 0.000000    | 0.999737 |
| rad45                         | 3.90870e-05 | 0.999776 | 3.90890e-05 | 0.999776 |
| rad39                         | 3.52518e-05 | 0.999811 | 3.52535e-05 | 0.999811 |
| rad50                         | 2.94437e-05 | 0.999841 | 2.94452e-05 | 0.999841 |
| rad19anti                     | 2.84705e-05 | 0.999869 | 2.84720e-05 | 0.999869 |
| rad46                         | 2.52823e-05 | 0.999894 | 2.52836e-05 | 0.999894 |
| rad23                         | 1.96875e-05 | 0.999914 | 1.96885e-05 | 0.999914 |
| PAH1+H                        | 1.23264e-05 | 0.999926 | 1.23270e-05 | 0.999926 |
| rad59                         | 1.05775e-05 | 0.999937 | 1.05780e-05 | 0.999937 |
| rad51                         | 9.81190e-06 | 0.999947 | 9.81238e-06 | 0.999947 |
| rad60syn                      | 7.57046e-06 | 0.999954 | 7.57085e-06 | 0.999954 |
| rad2                          | 6.07559e-06 | 0.999961 | 6.07590e-06 | 0.999960 |
| rad54                         | 5.03276e-06 | 0.999966 | 5.03302e-06 | 0.999966 |
| rad60anti                     | 4.79667e-06 | 0.999970 | 4.79692e-06 | 0.999970 |
| rad36                         | 3.83123e-06 | 0.999974 | 3.83143e-06 | 0.999974 |
| rad70                         | 2.76315e-06 | 0.999977 | 2.76328e-06 | 0.999977 |
| rad52                         | 2.72184e-06 | 0.999980 | 2.72199e-06 | 0.999980 |
| rad43                         | 2.57226e-06 | 0.999982 | 2.57239e-06 | 0.999982 |
| rad1                          | 1.75666e-06 | 0.999984 | 1.75675e-06 | 0.999984 |
| rad58                         | 1.46038e-06 | 0.999985 | 1.46046e-06 | 0.999985 |
| rad26                         | 1.41429e-06 | 0.999987 | 1.41436e-06 | 0.999987 |
| rad19syn                      | 1.28411e-06 | 0.999988 | 1.28418e-06 | 0.999988 |
| rad8                          | 1.25774e-06 | 0.999989 | 1.25781e-06 | 0.999989 |
| rad61                         | 1.25158e-06 | 0.999991 | 1.25164e-06 | 0.999991 |
| rad11                         | 1.19207e-06 | 0.999992 | 1.19213e-06 | 0.999992 |
| rad21                         | 1.00524e-06 | 0.999993 | 1.00530e-06 | 0.999993 |
| rad34                         | 7.69765e-07 | 0.999994 | 7.69804e-07 | 0.999994 |
| rad22                         | 7.46174e-07 | 0.999994 | 7.46213e-07 | 0.999994 |
| rad7                          | 6.37086e-07 | 0.999995 | 6.37119e-07 | 0.999995 |
| rad10                         | 5.64864e-07 | 0.999996 | 5.64893e-07 | 0.999996 |
| rad71                         | 4.29802e-07 | 0.999996 | 4.29824e-07 | 0.999996 |
| PAH8+H                        | 4.16121e-07 | 0.999996 | 4.16142e-07 | 0.999996 |
| rad55                         | 3.97388e-07 | 0.999997 | 3.97409e-07 | 0.999997 |
| rad20                         | 3.49484e-07 | 0.999997 | 3.49501e-07 | 0.999997 |
| rad28                         | 3.17870e-07 | 0.999997 | 3.17886e-07 | 0.999997 |
| rad73                         | 2.97346e-07 | 0.999998 | 2.97361e-07 | 0.999998 |
| rad65                         | 2.73964e-07 | 0.999998 | 2.73978e-07 | 0.999998 |
| rad41                         | 2.34679e-07 | 0.999998 | 2.34691e-07 | 0.999998 |
| rad13                         | 1.89624e-07 | 0.999998 | 1.89633e-07 | 0.999998 |
| rad24                         | 1.78012e-07 | 0.999999 | 1.78022e-07 | 0.999999 |

|           |             |          |             |          |
|-----------|-------------|----------|-------------|----------|
| rad56     | 1.60995e-07 | 0.999999 | 1.61003e-07 | 0.999999 |
| rad62     | 1.48817e-07 | 0.999999 | 1.48825e-07 | 0.999999 |
| rad53     | 1.39560e-07 | 0.999999 | 1.39567e-07 | 0.999999 |
| rad68syn  | 7.22693e-08 | 0.999999 | 7.22730e-08 | 0.999999 |
| rad18     | 6.21453e-08 | 0.999999 | 6.21485e-08 | 0.999999 |
| rad40syn  | 6.08219e-08 | 0.999999 | 6.08251e-08 | 0.999999 |
| rad64     | 5.62034e-08 | 0.999999 | 5.62063e-08 | 0.999999 |
| rad40anti | 4.88555e-08 | 0.999999 | 4.88580e-08 | 0.999999 |
| rad68anti | 4.69202e-08 | 0.999999 | 4.69226e-08 | 0.999999 |
| rad3      | 4.60547e-08 | 1.000000 | 4.60570e-08 | 0.999999 |
| rad4      | 3.59984e-08 | 1.000000 | 3.60002e-08 | 1.000000 |
| rad33     | 2.54686e-08 | 1.000000 | 2.54699e-08 | 1.000000 |
| rad72     | 1.52913e-08 | 1.000000 | 1.52921e-08 | 1.000000 |
| rad42     | 1.43055e-08 | 1.000000 | 1.43062e-08 | 1.000000 |
| rad47     | 1.12582e-08 | 1.000000 | 1.12587e-08 | 1.000000 |
| rad25     | 4.63316e-09 | 1.000000 | 4.63340e-09 | 1.000000 |
| rad31     | 3.43229e-09 | 1.000000 | 3.43246e-09 | 1.000000 |
| rad27     | 2.93218e-09 | 1.000000 | 2.93233e-09 | 1.000000 |
| rad14     | 3.14337e-10 | 1.000000 | 3.14353e-10 | 1.000000 |
| rad5      | 1.80415e-10 | 1.000000 | 1.80425e-10 | 1.000000 |

10000.000 Pa, 1200.00000 K

| Rate constant             | True (fraction)       | Effective (fraction)  |
|---------------------------|-----------------------|-----------------------|
| Total                     | 3.72623e-12 (1.00 )   | 3.72576e-12 (1.00 )   |
| Formation of rad19        | 2.86288e-12 (0.768 )  | 2.86244e-12 (0.768 )  |
| H-abstraction to cyc2enyl | 6.53266e-13 (0.175 )  | 6.53266e-13 (0.175 )  |
| H-abstraction to cyclenyl | 2.10085e-13 (0.0564 ) | 2.10053e-13 (0.0564 ) |

| species                       | PYtrue      | Cumul    | PYeffective | Cumul    |
|-------------------------------|-------------|----------|-------------|----------|
| Indene+H                      | 0.409794    | 0.409794 | 0.409846    | 0.409846 |
| PhCHCCH2+H                    | 0.231068    | 0.640861 | 0.231098    | 0.640944 |
| Benzene+cycloprop-2-enylidene | 0.175315    | 0.816177 | 0.175338    | 0.816281 |
| rad9                          | 0.0821617   | 0.898338 | 0.0821726   | 0.898454 |
| Benzene+cycloprop-1-enylidene | 0.0563801   | 0.954718 | 0.0563785   | 0.954833 |
| Ph+MeAc                       | 0.00828532  | 0.963004 | 0.00828640  | 0.963119 |
| Ph+Allene                     | 0.00814541  | 0.971149 | 0.00814642  | 0.971265 |
| C2H2+PhCH2                    | 0.00800689  | 0.979156 | 0.00800790  | 0.979273 |
| PhCH2CCH+H                    | 0.00668743  | 0.985843 | 0.00668829  | 0.985962 |
| rad67                         | 0.00332807  | 0.989172 | 0.00332849  | 0.989290 |
| PhCCCH3+H                     | 0.00296786  | 0.992139 | 0.00296824  | 0.992258 |
| PhCCH+CH3                     | 0.00215659  | 0.994296 | 0.00215686  | 0.994415 |
| rad35                         | 0.00120751  | 0.995504 | 0.00120767  | 0.995623 |
| PhcycC3H3_B+H                 | 0.00113112  | 0.996635 | 0.00113127  | 0.996754 |
| PhcycC3H3_A+H                 | 0.00108726  | 0.997722 | 0.00108740  | 0.997842 |
| PAH10+CH3                     | 0.000551529 | 0.998273 | 0.000551599 | 0.998393 |
| rad12                         | 0.000256803 | 0.998530 | 0.000256835 | 0.998650 |
| rad37                         | 0.000227891 | 0.998758 | 0.000227921 | 0.998878 |
| PAH7+H                        | 0.00020697  | 0.998959 | 0.00020723  | 0.999079 |
| PAH9+H                        | 0.000146715 | 0.999106 | 0.000146734 | 0.999225 |
| rad15                         | 0.000138457 | 0.999244 | 0.000138475 | 0.999364 |
| Phenyl+cycC3H4                | 0.000118462 | 0.999362 | 0.000000    | 0.999364 |
| PAH3+H                        | 0.000115087 | 0.999478 | 0.000115102 | 0.999479 |
| rad38                         | 0.000114258 | 0.999592 | 0.000114273 | 0.999593 |
| rad6                          | 9.67772e-05 | 0.999689 | 9.67899e-05 | 0.999690 |
| rad30                         | 5.50716e-05 | 0.999744 | 5.50787e-05 | 0.999745 |
| rad45                         | 3.61316e-05 | 0.999780 | 3.61362e-05 | 0.999781 |
| rad39                         | 3.46170e-05 | 0.999814 | 3.46215e-05 | 0.999816 |
| rad50                         | 2.91991e-05 | 0.999844 | 2.92029e-05 | 0.999845 |
| rad46                         | 2.49522e-05 | 0.999869 | 2.49553e-05 | 0.999870 |
| rad19anti                     | 2.15071e-05 | 0.999890 | 2.15098e-05 | 0.999891 |
| rad23                         | 1.73329e-05 | 0.999907 | 1.73351e-05 | 0.999909 |
| PAH1+H                        | 1.21676e-05 | 0.999920 | 1.21691e-05 | 0.999921 |
| rad59                         | 1.04181e-05 | 0.999930 | 1.04193e-05 | 0.999931 |
| rad51                         | 9.76108e-06 | 0.999940 | 9.76235e-06 | 0.999941 |
| rad60syn                      | 7.43429e-06 | 0.999947 | 7.43524e-06 | 0.999949 |
| rad2                          | 5.64497e-06 | 0.999953 | 5.64568e-06 | 0.999954 |
| rad54                         | 4.93023e-06 | 0.999958 | 4.93085e-06 | 0.999959 |
| rad60anti                     | 4.71179e-06 | 0.999962 | 4.71239e-06 | 0.999964 |
| rad36                         | 3.51261e-06 | 0.999966 | 3.51306e-06 | 0.999967 |
| rad8                          | 3.33616e-06 | 0.999969 | 3.33659e-06 | 0.999971 |
| rad11                         | 3.25978e-06 | 0.999973 | 3.26020e-06 | 0.999974 |
| rad70                         | 2.71841e-06 | 0.999975 | 2.71876e-06 | 0.999977 |
| rad52                         | 2.70316e-06 | 0.999978 | 2.70351e-06 | 0.999979 |
| rad21                         | 2.70089e-06 | 0.999981 | 2.70123e-06 | 0.999982 |
| rad43                         | 2.52211e-06 | 0.999983 | 2.52244e-06 | 0.999985 |
| rad1                          | 1.61199e-06 | 0.999985 | 1.61219e-06 | 0.999986 |
| rad58                         | 1.44847e-06 | 0.999986 | 1.44866e-06 | 0.999988 |

|           |             |          |             |          |
|-----------|-------------|----------|-------------|----------|
| rad26     | 1.36029e-06 | 0.999988 | 1.36046e-06 | 0.999989 |
| rad7      | 1.28076e-06 | 0.999989 | 1.28092e-06 | 0.999990 |
| rad22     | 1.27378e-06 | 0.999990 | 1.27395e-06 | 0.999992 |
| rad61     | 1.24058e-06 | 0.999991 | 1.24074e-06 | 0.999993 |
| rad19syn  | 1.13972e-06 | 0.999993 | 1.13986e-06 | 0.999994 |
| rad10     | 1.07832e-06 | 0.999994 | 1.07846e-06 | 0.999995 |
| rad34     | 7.59259e-07 | 0.999994 | 7.59356e-07 | 0.999996 |
| rad20     | 7.31122e-07 | 0.999995 | 7.31214e-07 | 0.999997 |
| rad13     | 5.38048e-07 | 0.999996 | 5.38117e-07 | 0.999997 |
| rad71     | 4.31660e-07 | 0.999996 | 4.31715e-07 | 0.999998 |
| PAH8+H    | 4.16450e-07 | 0.999997 | 4.16502e-07 | 0.999998 |
| rad55     | 3.89845e-07 | 0.999997 | 3.89895e-07 | 0.999998 |
| rad73     | 2.98024e-07 | 0.999997 | 2.98061e-07 | 0.999999 |
| rad28     | 2.78487e-07 | 0.999997 | 2.78523e-07 | 0.999999 |
| rad65     | 2.72471e-07 | 0.999998 | 2.72505e-07 | 0.999999 |
| rad24     | 2.55752e-07 | 0.999998 | 2.55784e-07 | 0.999999 |
| rad41     | 2.31471e-07 | 0.999998 | 2.31500e-07 | 1.000000 |
| rad18     | 1.69172e-07 | 0.999998 | 1.69194e-07 | 1.000000 |
| rad56     | 1.59559e-07 | 0.999999 | 1.59579e-07 | 1.000000 |
| rad62     | 1.45937e-07 | 0.999999 | 1.45956e-07 | 1.000000 |
| rad53     | 1.37825e-07 | 0.999999 | 1.37842e-07 | 1.000000 |
| rad68syn  | 7.18856e-08 | 0.999999 | 7.18948e-08 | 1.000000 |
| rad40syn  | 6.07004e-08 | 0.999999 | 6.07081e-08 | 1.000000 |
| rad33     | 5.83858e-08 | 0.999999 | 5.83932e-08 | 1.000000 |
| rad64     | 5.56670e-08 | 0.999999 | 5.56740e-08 | 1.000000 |
| rad40anti | 4.87727e-08 | 0.999999 | 4.87789e-08 | 1.000000 |
| rad68anti | 4.66656e-08 | 0.999999 | 4.66716e-08 | 1.000000 |
| rad3      | 4.19441e-08 | 0.999999 | 4.19495e-08 | 1.000000 |
| rad4      | 3.26314e-08 | 0.999999 | 3.26356e-08 | 1.000000 |
| rad25     | 2.03634e-08 | 0.999999 | 2.03660e-08 | 1.000000 |
| rad72     | 1.54202e-08 | 0.999999 | 1.54221e-08 | 1.000000 |
| rad42     | 1.40949e-08 | 0.999999 | 1.40967e-08 | 1.000000 |
| rad47     | 1.06350e-08 | 0.999999 | 1.06364e-08 | 1.000000 |
| rad27     | 1.03638e-08 | 0.999999 | 1.03651e-08 | 1.000000 |
| rad31     | 3.18783e-09 | 0.999999 | 3.18824e-09 | 1.000000 |
| rad14     | 8.12298e-10 | 0.999999 | 8.12407e-10 | 1.000000 |
| rad5      | 2.20825e-10 | 0.999999 | 2.20852e-10 | 1.000000 |

100000.000 Pa, 1300.00000 K

=====

| Rate constant             | True (fraction)       | Effective (fraction)  |
|---------------------------|-----------------------|-----------------------|
| Total                     | 4.84401e-12 (1.00 )   | 4.84262e-12 (1.00 )   |
| Formation of rad19        | 3.55537e-12 (0.734 )  | 3.55411e-12 (0.734 )  |
| H-abstraction to cyc2enyl | 9.48893e-13 (0.196 )  | 9.48893e-13 (0.196 )  |
| H-abstraction to cyclenyl | 3.39740e-13 (0.0701 ) | 3.39619e-13 (0.0701 ) |

| species                       | PYtrue      | Cumul    | PYeffective | Cumul    |
|-------------------------------|-------------|----------|-------------|----------|
| Indene+H                      | 0.396801    | 0.396801 | 0.396915    | 0.396915 |
| PhCHCCH2+H                    | 0.220497    | 0.617298 | 0.220560    | 0.617475 |
| Benzene+cycloprop-2-enylidene | 0.195890    | 0.813188 | 0.195946    | 0.813421 |
| rad9                          | 0.0727093   | 0.885897 | 0.0727301   | 0.886151 |
| Benzene+cycloprop-1-enylidene | 0.0701362   | 0.956033 | 0.0701313   | 0.956282 |
| Ph+MeAc                       | 0.00789792  | 0.963931 | 0.00790023  | 0.964183 |
| Ph+Allene                     | 0.00777667  | 0.971708 | 0.00777884  | 0.971961 |
| C2H2+PhCH2                    | 0.00762540  | 0.979333 | 0.00762758  | 0.979589 |
| PhCH2CCH+H                    | 0.00633480  | 0.985668 | 0.00633662  | 0.985926 |
| rad67                         | 0.00316998  | 0.988838 | 0.00317089  | 0.989096 |
| PhCCCH3+H                     | 0.00283867  | 0.991677 | 0.00283948  | 0.991936 |
| PhCCH+CH3                     | 0.00205229  | 0.993729 | 0.00205288  | 0.993989 |
| PhcycC3H3_B+H                 | 0.00132658  | 0.995055 | 0.00132696  | 0.995316 |
| PhcycC3H3_A+H                 | 0.00131911  | 0.996375 | 0.00131949  | 0.996635 |
| rad35                         | 0.00114996  | 0.997525 | 0.00115029  | 0.997786 |
| PAH10+CH3                     | 0.000519540 | 0.998044 | 0.000519688 | 0.998305 |
| rad15                         | 0.000279093 | 0.998323 | 0.000279172 | 0.998584 |
| Phenyl+cycC3H4                | 0.000261305 | 0.998584 | 0.000000    | 0.998584 |
| rad12                         | 0.000260221 | 0.998845 | 0.000260296 | 0.998845 |
| rad37                         | 0.000217283 | 0.999062 | 0.000217345 | 0.999062 |
| PAH7+H                        | 0.000191831 | 0.999254 | 0.000191885 | 0.999254 |
| PAH9+H                        | 0.000138955 | 0.999393 | 0.000138995 | 0.999393 |
| rad38                         | 0.000108167 | 0.999501 | 0.000108198 | 0.999501 |
| PAH3+H                        | 0.000108039 | 0.999609 | 0.000108070 | 0.999609 |
| rad6                          | 8.94428e-05 | 0.999698 | 8.94681e-05 | 0.999699 |
| rad30                         | 5.22658e-05 | 0.999751 | 5.22807e-05 | 0.999751 |
| rad39                         | 3.31036e-05 | 0.999784 | 3.31130e-05 | 0.999784 |
| rad45                         | 3.30380e-05 | 0.999817 | 3.30474e-05 | 0.999817 |
| rad50                         | 2.75901e-05 | 0.999844 | 2.75980e-05 | 0.999845 |
| rad46                         | 2.36184e-05 | 0.999868 | 2.36251e-05 | 0.999868 |
| rad19anti                     | 1.64869e-05 | 0.999885 | 1.64916e-05 | 0.999885 |

|           |             |          |             |          |
|-----------|-------------|----------|-------------|----------|
| rad23     | 1.56021e-05 | 0.999900 | 1.56066e-05 | 0.999900 |
| PAH1+H    | 1.14221e-05 | 0.999912 | 1.14253e-05 | 0.999912 |
| rad59     | 9.79180e-06 | 0.999921 | 9.79464e-06 | 0.999922 |
| rad51     | 9.21702e-06 | 0.999931 | 9.21961e-06 | 0.999931 |
| rad11     | 8.19188e-06 | 0.999939 | 8.19417e-06 | 0.999939 |
| rad60syn  | 7.00967e-06 | 0.999946 | 7.01167e-06 | 0.999946 |
| rad8      | 5.26363e-06 | 0.999951 | 5.26514e-06 | 0.999951 |
| rad2      | 5.25314e-06 | 0.999956 | 5.25465e-06 | 0.999957 |
| rad54     | 4.70672e-06 | 0.999961 | 4.70807e-06 | 0.999961 |
| rad60anti | 4.44110e-06 | 0.999965 | 4.44237e-06 | 0.999966 |
| rad21     | 4.11595e-06 | 0.999970 | 4.11713e-06 | 0.999970 |
| rad36     | 3.20006e-06 | 0.999973 | 3.20098e-06 | 0.999973 |
| rad7      | 2.68655e-06 | 0.999975 | 2.68732e-06 | 0.999976 |
| rad70     | 2.55354e-06 | 0.999978 | 2.55427e-06 | 0.999978 |
| rad52     | 2.55330e-06 | 0.999981 | 2.55404e-06 | 0.999981 |
| rad10     | 2.42612e-06 | 0.999983 | 2.42681e-06 | 0.999983 |
| rad43     | 2.37476e-06 | 0.999985 | 2.37544e-06 | 0.999986 |
| rad26     | 1.70209e-06 | 0.999987 | 1.70258e-06 | 0.999987 |
| rad22     | 1.59055e-06 | 0.999989 | 1.59101e-06 | 0.999989 |
| rad1      | 1.48934e-06 | 0.999990 | 1.48977e-06 | 0.999990 |
| rad58     | 1.35486e-06 | 0.999991 | 1.35525e-06 | 0.999992 |
| rad61     | 1.15979e-06 | 0.999993 | 1.16012e-06 | 0.999993 |
| rad19syn  | 1.00720e-06 | 0.999994 | 1.00749e-06 | 0.999994 |
| rad13     | 1.00132e-06 | 0.999995 | 1.00161e-06 | 0.999995 |
| rad20     | 9.94938e-07 | 0.999996 | 9.95228e-07 | 0.999996 |
| rad34     | 7.11721e-07 | 0.999996 | 7.11925e-07 | 0.999997 |
| rad71     | 4.07554e-07 | 0.999997 | 4.07670e-07 | 0.999997 |
| PAH8+H    | 3.88073e-07 | 0.999997 | 3.88184e-07 | 0.999997 |
| rad55     | 3.71285e-07 | 0.999997 | 3.71391e-07 | 0.999998 |
| rad18     | 3.61092e-07 | 0.999998 | 3.61196e-07 | 0.999998 |
| rad73     | 2.81342e-07 | 0.999998 | 2.81422e-07 | 0.999999 |
| rad24     | 2.79767e-07 | 0.999998 | 2.79847e-07 | 0.999999 |
| rad28     | 2.59806e-07 | 0.999999 | 2.59880e-07 | 0.999999 |
| rad65     | 2.57091e-07 | 0.999999 | 2.57165e-07 | 0.999999 |
| rad41     | 2.16761e-07 | 0.999999 | 2.16823e-07 | 1.000000 |
| rad56     | 1.50368e-07 | 0.999999 | 1.50411e-07 | 1.000000 |
| rad62     | 1.38249e-07 | 0.999999 | 1.38289e-07 | 1.000000 |
| rad53     | 1.30249e-07 | 1.000000 | 1.30287e-07 | 1.000000 |
| rad33     | 8.47307e-08 | 1.000000 | 8.47548e-08 | 1.000000 |
| rad68syn  | 6.70937e-08 | 1.000000 | 6.71129e-08 | 1.000000 |
| rad40syn  | 5.65858e-08 | 1.000000 | 5.66021e-08 | 1.000000 |
| rad64     | 5.24233e-08 | 1.000000 | 5.24384e-08 | 1.000000 |
| rad25     | 4.90701e-08 | 1.000000 | 4.90842e-08 | 1.000000 |
| rad40anti | 4.54610e-08 | 1.000000 | 4.54740e-08 | 1.000000 |
| rad68anti | 4.35566e-08 | 1.000000 | 4.35690e-08 | 1.000000 |
| rad3      | 3.82588e-08 | 1.000000 | 3.82698e-08 | 1.000000 |
| rad4      | 2.96978e-08 | 1.000000 | 2.97063e-08 | 1.000000 |
| rad27     | 2.25944e-08 | 1.000000 | 2.26008e-08 | 1.000000 |
| rad72     | 1.45663e-08 | 1.000000 | 1.45705e-08 | 1.000000 |
| rad42     | 1.32764e-08 | 1.000000 | 1.32803e-08 | 1.000000 |
| rad47     | 9.50489e-09 | 1.000000 | 9.50760e-09 | 1.000000 |
| rad31     | 2.93770e-09 | 1.000000 | 2.93854e-09 | 1.000000 |
| rad14     | 1.61044e-09 | 1.000000 | 1.61090e-09 | 1.000000 |
| rad5      | 4.11958e-10 | 1.000000 | 4.12076e-10 | 1.000000 |

100000.000 Pa, 1400.00000 K

| Rate constant             | True (fraction)       | Effective (fraction)  |
|---------------------------|-----------------------|-----------------------|
| Total                     | 6.19360e-12 (1.00 )   | 6.18996e-12 (1.00 )   |
| Formation of rad19        | 4.34185e-12 (0.701 )  | 4.33860e-12 (0.701 )  |
| H-abstraction to cyc2enyl | 1.32990e-12 (0.215 )  | 1.32990e-12 (0.215 )  |
| H-abstraction to cyclenyl | 5.21850e-13 (0.0843 ) | 5.21460e-13 (0.0842 ) |

| species                       | PYtrue     | Cumul    | PYeffective | Cumul    |
|-------------------------------|------------|----------|-------------|----------|
| Indene+H                      | 0.384173   | 0.384173 | 0.384398    | 0.384398 |
| Benzene+cycloprop-2-enylidene | 0.214721   | 0.598894 | 0.214847    | 0.599245 |
| PhCHCCH2+H                    | 0.210689   | 0.809583 | 0.210813    | 0.810058 |
| Benzene+cycloprop-1-enylidene | 0.0842564  | 0.893839 | 0.0842429   | 0.894301 |
| rad9                          | 0.0627707  | 0.956610 | 0.0628076   | 0.957108 |
| Ph+MeAc                       | 0.00753501 | 0.964145 | 0.00753948  | 0.964648 |
| Ph+Allene                     | 0.00743890 | 0.971584 | 0.00744324  | 0.972091 |
| C2H2+PhCH2                    | 0.00726469 | 0.978849 | 0.00726893  | 0.979360 |
| PhCH2CCH+H                    | 0.00598634 | 0.984835 | 0.00598986  | 0.985350 |
| rad67                         | 0.00302148 | 0.987856 | 0.00302325  | 0.988373 |
| PhCCCH3+H                     | 0.00272180 | 0.990578 | 0.00272340  | 0.991096 |
| PhCCH+CH3                     | 0.00194869 | 0.992527 | 0.00194984  | 0.993046 |
| PhcycC3H3_A+H                 | 0.00173732 | 0.994264 | 0.00173833  | 0.994785 |
| PhcycC3H3_B+H                 | 0.00173034 | 0.995995 | 0.00173136  | 0.996516 |



|                |             |          |             |          |
|----------------|-------------|----------|-------------|----------|
| rad35          | 0.00109563  | 0.997090 | 0.00109628  | 0.997612 |
| rad15          | 0.000537977 | 0.997628 | 0.000538293 | 0.998151 |
| Phenyl+cycC3H4 | 0.000523975 | 0.998152 | 0.000000    | 0.998151 |
| PAH10+CH3      | 0.000486782 | 0.998639 | 0.000487069 | 0.998638 |
| rad12          | 0.000247119 | 0.998886 | 0.000247265 | 0.998885 |
| rad37          | 0.000207736 | 0.999094 | 0.000207858 | 0.999093 |
| PAH7+H         | 0.000183126 | 0.999277 | 0.000183233 | 0.999276 |
| PAH9+H         | 0.000130524 | 0.999407 | 0.000130601 | 0.999407 |
| rad38          | 0.000101793 | 0.999509 | 0.000101852 | 0.999508 |
| PAH3+H         | 0.000100280 | 0.999610 | 0.000100339 | 0.999609 |
| rad6           | 9.16299e-05 | 0.999701 | 9.16839e-05 | 0.999700 |
| rad30          | 4.95424e-05 | 0.999751 | 4.95716e-05 | 0.999750 |
| rad39          | 3.14952e-05 | 0.999782 | 3.15137e-05 | 0.999782 |
| rad45          | 3.03867e-05 | 0.999813 | 3.04046e-05 | 0.999812 |
| rad50          | 2.56707e-05 | 0.999838 | 2.56858e-05 | 0.999838 |
| rad46          | 2.21211e-05 | 0.999860 | 2.21341e-05 | 0.999860 |
| rad11          | 1.57954e-05 | 0.999876 | 1.58047e-05 | 0.999876 |
| rad23          | 1.55930e-05 | 0.999892 | 1.56021e-05 | 0.999891 |
| rad19anti      | 1.28244e-05 | 0.999905 | 1.28320e-05 | 0.999904 |
| PAH1+H         | 1.06049e-05 | 0.999915 | 1.06112e-05 | 0.999915 |
| rad59          | 9.11469e-06 | 0.999924 | 9.12010e-06 | 0.999924 |
| rad51          | 8.54406e-06 | 0.999933 | 8.54907e-06 | 0.999932 |
| rad60syn       | 6.56809e-06 | 0.999939 | 6.57195e-06 | 0.999939 |
| rad8           | 6.46066e-06 | 0.999946 | 6.46445e-06 | 0.999945 |
| rad10          | 4.98419e-06 | 0.999951 | 4.98712e-06 | 0.999950 |
| rad2           | 4.82287e-06 | 0.999956 | 4.82571e-06 | 0.999955 |
| rad7           | 4.82091e-06 | 0.999961 | 4.82375e-06 | 0.999960 |
| rad21          | 4.77038e-06 | 0.999965 | 4.77318e-06 | 0.999965 |
| rad54          | 4.51840e-06 | 0.999970 | 4.52105e-06 | 0.999969 |
| rad60anti      | 4.15843e-06 | 0.999974 | 4.16087e-06 | 0.999973 |
| rad36          | 2.93865e-06 | 0.999977 | 2.94037e-06 | 0.999976 |
| rad26          | 2.71395e-06 | 0.999980 | 2.71554e-06 | 0.999979 |
| rad70          | 2.37695e-06 | 0.999982 | 2.37835e-06 | 0.999981 |
| rad52          | 2.37146e-06 | 0.999984 | 2.37285e-06 | 0.999984 |
| rad43          | 2.22343e-06 | 0.999987 | 2.22474e-06 | 0.999986 |
| rad22          | 1.84385e-06 | 0.999988 | 1.84493e-06 | 0.999988 |
| rad1           | 1.36390e-06 | 0.999990 | 1.36469e-06 | 0.999989 |
| rad13          | 1.31498e-06 | 0.999991 | 1.31576e-06 | 0.999991 |
| rad58          | 1.24546e-06 | 0.999992 | 1.24620e-06 | 0.999992 |
| rad20          | 1.10101e-06 | 0.999993 | 1.10166e-06 | 0.999993 |
| rad61          | 1.06649e-06 | 0.999995 | 1.06712e-06 | 0.999994 |
| rad19syn       | 8.90719e-07 | 0.999995 | 8.91242e-07 | 0.999995 |
| rad18          | 7.38520e-07 | 0.999996 | 7.38955e-07 | 0.999996 |
| rad34          | 6.59214e-07 | 0.999997 | 6.59602e-07 | 0.999996 |
| rad71          | 3.74736e-07 | 0.999997 | 3.74956e-07 | 0.999997 |
| rad55          | 3.55166e-07 | 0.999998 | 3.55375e-07 | 0.999997 |
| PAH8+H         | 3.51952e-07 | 0.999998 | 3.52159e-07 | 0.999997 |
| rad24          | 2.76448e-07 | 0.999998 | 2.76611e-07 | 0.999998 |
| rad28          | 2.72158e-07 | 0.999998 | 2.72318e-07 | 0.999998 |
| rad73          | 2.59068e-07 | 0.999999 | 2.59220e-07 | 0.999998 |
| rad65          | 2.38202e-07 | 0.999999 | 2.38342e-07 | 0.999998 |
| rad41          | 2.00457e-07 | 0.999999 | 2.00574e-07 | 0.999999 |
| rad56          | 1.40896e-07 | 0.999999 | 1.40979e-07 | 0.999999 |
| rad62          | 1.30666e-07 | 0.999999 | 1.30742e-07 | 0.999999 |
| rad53          | 1.22838e-07 | 1.000000 | 1.22910e-07 | 0.999999 |
| rad33          | 9.50285e-08 | 1.000000 | 9.50847e-08 | 0.999999 |
| rad25          | 7.37370e-08 | 1.000000 | 7.37806e-08 | 0.999999 |
| rad68syn       | 6.13233e-08 | 1.000000 | 6.13593e-08 | 0.999999 |
| rad40syn       | 5.14701e-08 | 1.000000 | 5.15004e-08 | 0.999999 |
| rad64          | 4.88519e-08 | 1.000000 | 4.88806e-08 | 0.999999 |
| rad40anti      | 4.13308e-08 | 1.000000 | 4.13551e-08 | 0.999999 |
| rad68anti      | 3.98167e-08 | 1.000000 | 3.98401e-08 | 0.999999 |
| rad3           | 3.41792e-08 | 1.000000 | 3.41993e-08 | 0.999999 |
| rad27          | 3.25211e-08 | 1.000000 | 3.25402e-08 | 0.999999 |
| rad4           | 2.64761e-08 | 1.000000 | 2.64917e-08 | 1.000000 |
| rad72          | 1.33595e-08 | 1.000000 | 1.33673e-08 | 1.000000 |
| rad42          | 1.24142e-08 | 1.000000 | 1.24215e-08 | 1.000000 |
| rad47          | 8.34707e-09 | 1.000000 | 8.35197e-09 | 1.000000 |
| rad31          | 2.71742e-09 | 1.000000 | 2.71901e-09 | 1.000000 |
| rad14          | 2.31462e-09 | 1.000000 | 2.31598e-09 | 1.000000 |
| rad5           | 1.17099e-09 | 1.000000 | 1.17168e-09 | 1.000000 |

100000.000 Pa, 1500.00000 K

=====

| Rate constant             | True (fraction)       | Effective (fraction)  |
|---------------------------|-----------------------|-----------------------|
| Total                     | 7.80417e-12 (1.00 )   | 7.79561e-12 (1.00 )   |
| Formation of rad19        | 5.22661e-12 (0.670 )  | 5.21915e-12 (0.669 )  |
| H-abstraction to cyc2enyl | 1.80920e-12 (0.232 )  | 1.80920e-12 (0.232 )  |
| H-abstraction to cyclenyl | 7.68359e-13 (0.0985 ) | 7.67261e-13 (0.0984 ) |

| species                       | PYtrue      | Cumul    | PYeffective | Cumul    |
|-------------------------------|-------------|----------|-------------|----------|
| Indene+H                      | 0.368964    | 0.368964 | 0.369369    | 0.369369 |
| Benzene+cycloprop-2-enylidene | 0.231825    | 0.600788 | 0.232080    | 0.601448 |
| PhCHCCH2+H                    | 0.203867    | 0.804655 | 0.204091    | 0.805540 |
| Benzene+cycloprop-1-enylidene | 0.0984549   | 0.903110 | 0.0984222   | 0.903962 |
| rad9                          | 0.0527170   | 0.955827 | 0.0527748   | 0.956737 |
| Ph+MeAc                       | 0.00728281  | 0.963110 | 0.00729084  | 0.964027 |
| Ph+Allene                     | 0.00721684  | 0.970327 | 0.00722476  | 0.971252 |
| C2H2+PhCH2                    | 0.00701251  | 0.977339 | 0.00702022  | 0.978272 |
| PhCH2CCH+H                    | 0.00574450  | 0.983084 | 0.00575081  | 0.984023 |
| rad67                         | 0.00291843  | 0.986002 | 0.00292164  | 0.986945 |
| PhCCCH3+H                     | 0.00264039  | 0.988643 | 0.00264329  | 0.989588 |
| PhcycC3H3_B+H                 | 0.00243778  | 0.991080 | 0.00244046  | 0.992029 |
| PhcycC3H3_A+H                 | 0.00240488  | 0.993485 | 0.00240752  | 0.994436 |
| PhCCH+CH3                     | 0.00187278  | 0.995358 | 0.00187484  | 0.996311 |
| rad35                         | 0.00105779  | 0.996416 | 0.00105895  | 0.997370 |
| Phenyl+cycC3H4                | 0.000956588 | 0.997372 | 0.000000    | 0.997370 |
| rad15                         | 0.000836146 | 0.998209 | 0.000837060 | 0.998207 |
| PAH10+CH3                     | 0.000464058 | 0.998673 | 0.000464568 | 0.998672 |
| rad12                         | 0.000225619 | 0.998898 | 0.000225867 | 0.998897 |
| rad37                         | 0.000201342 | 0.999100 | 0.000201563 | 0.999099 |
| PAH7+H                        | 0.000176578 | 0.999276 | 0.000176772 | 0.999276 |
| PAH9+H                        | 0.000124084 | 0.999400 | 0.000124220 | 0.999400 |
| rad6                          | 0.000105296 | 0.999506 | 0.000105412 | 0.999505 |
| rad38                         | 9.70947e-05 | 0.999603 | 9.72011e-05 | 0.999603 |
| PAH3+H                        | 9.44560e-05 | 0.999697 | 9.45599e-05 | 0.999697 |
| rad30                         | 4.76488e-05 | 0.999745 | 4.77011e-05 | 0.999745 |
| rad39                         | 3.01550e-05 | 0.999775 | 3.01881e-05 | 0.999775 |
| rad45                         | 2.81776e-05 | 0.999803 | 2.82086e-05 | 0.999803 |
| rad50                         | 2.40720e-05 | 0.999827 | 2.40985e-05 | 0.999827 |
| rad11                         | 2.27769e-05 | 0.999850 | 2.28018e-05 | 0.999850 |
| rad46                         | 2.09365e-05 | 0.999871 | 2.09595e-05 | 0.999871 |
| rad23                         | 1.80001e-05 | 0.999889 | 1.80199e-05 | 0.999889 |
| rad19anti                     | 1.01161e-05 | 0.999899 | 1.01272e-05 | 0.999899 |
| PAH1+H                        | 1.00120e-05 | 0.999909 | 1.00230e-05 | 0.999909 |
| rad59                         | 8.61394e-06 | 0.999918 | 8.62341e-06 | 0.999918 |
| rad10                         | 8.14741e-06 | 0.999926 | 8.15636e-06 | 0.999926 |
| rad51                         | 7.96579e-06 | 0.999934 | 7.97453e-06 | 0.999934 |
| rad8                          | 6.98270e-06 | 0.999941 | 6.99037e-06 | 0.999941 |
| rad7                          | 6.89122e-06 | 0.999948 | 6.89878e-06 | 0.999948 |
| rad60syn                      | 6.25044e-06 | 0.999954 | 6.25730e-06 | 0.999954 |
| rad26                         | 4.91826e-06 | 0.999959 | 4.92367e-06 | 0.999959 |
| rad21                         | 4.90673e-06 | 0.999964 | 4.91212e-06 | 0.999964 |
| rad54                         | 4.43615e-06 | 0.999968 | 4.44102e-06 | 0.999968 |
| rad2                          | 4.33204e-06 | 0.999972 | 4.33680e-06 | 0.999973 |
| rad60anti                     | 3.95454e-06 | 0.999976 | 3.95888e-06 | 0.999977 |
| rad36                         | 2.72373e-06 | 0.999979 | 2.72672e-06 | 0.999980 |
| rad70                         | 2.24869e-06 | 0.999981 | 2.25116e-06 | 0.999982 |
| rad52                         | 2.21776e-06 | 0.999984 | 2.22020e-06 | 0.999984 |
| rad22                         | 2.15311e-06 | 0.999986 | 2.15548e-06 | 0.999986 |
| rad43                         | 2.11707e-06 | 0.999988 | 2.11939e-06 | 0.999988 |
| rad13                         | 1.37676e-06 | 0.999989 | 1.37827e-06 | 0.999990 |
| rad1                          | 1.22605e-06 | 0.999991 | 1.22739e-06 | 0.999991 |
| rad18                         | 1.21617e-06 | 0.999992 | 1.21750e-06 | 0.999992 |
| rad58                         | 1.15917e-06 | 0.999993 | 1.16045e-06 | 0.999993 |
| rad20                         | 1.10473e-06 | 0.999994 | 1.10594e-06 | 0.999994 |
| rad61                         | 9.95439e-07 | 0.999995 | 9.96535e-07 | 0.999995 |
| rad19syn                      | 7.90015e-07 | 0.999996 | 7.90885e-07 | 0.999996 |
| rad34                         | 6.20119e-07 | 0.999996 | 6.20800e-07 | 0.999997 |
| rad55                         | 3.48047e-07 | 0.999997 | 3.48429e-07 | 0.999997 |
| rad71                         | 3.44157e-07 | 0.999997 | 3.44535e-07 | 0.999997 |
| rad28                         | 3.28470e-07 | 0.999997 | 3.28831e-07 | 0.999998 |
| PAH8+H                        | 3.21456e-07 | 0.999998 | 3.21809e-07 | 0.999998 |
| rad24                         | 2.64560e-07 | 0.999998 | 2.64850e-07 | 0.999998 |
| rad73                         | 2.38649e-07 | 0.999998 | 2.38912e-07 | 0.999999 |
| rad65                         | 2.22194e-07 | 0.999998 | 2.22437e-07 | 0.999999 |
| rad41                         | 1.88264e-07 | 0.999999 | 1.88471e-07 | 0.999999 |
| rad56                         | 1.35805e-07 | 0.999999 | 1.35954e-07 | 0.999999 |
| rad62                         | 1.25635e-07 | 0.999999 | 1.25773e-07 | 0.999999 |
| rad53                         | 1.19120e-07 | 0.999999 | 1.19251e-07 | 0.999999 |
| rad33                         | 9.27542e-08 | 0.999999 | 9.28561e-08 | 0.999999 |
| rad25                         | 8.57771e-08 | 0.999999 | 8.58712e-08 | 1.000000 |
| rad68syn                      | 5.66923e-08 | 0.999999 | 5.67546e-08 | 1.000000 |
| rad40syn                      | 4.72384e-08 | 0.999999 | 4.72903e-08 | 1.000000 |
| rad64                         | 4.63483e-08 | 0.999999 | 4.63992e-08 | 1.000000 |
| rad40anti                     | 3.79035e-08 | 0.999999 | 3.79451e-08 | 1.000000 |
| rad27                         | 3.72083e-08 | 0.999999 | 3.72491e-08 | 1.000000 |
| rad68anti                     | 3.68182e-08 | 0.999999 | 3.68586e-08 | 1.000000 |

|       |             |          |             |          |
|-------|-------------|----------|-------------|----------|
| rad3  | 2.97156e-08 | 1.000000 | 2.97482e-08 | 1.000000 |
| rad4  | 2.29514e-08 | 1.000000 | 2.29766e-08 | 1.000000 |
| rad72 | 1.22000e-08 | 1.000000 | 1.22133e-08 | 1.000000 |
| rad42 | 1.18214e-08 | 1.000000 | 1.18343e-08 | 1.000000 |
| rad47 | 7.38916e-09 | 1.000000 | 7.39722e-09 | 1.000000 |
| rad5  | 4.53601e-09 | 1.000000 | 4.54099e-09 | 1.000000 |
| rad14 | 2.64916e-09 | 1.000000 | 2.65207e-09 | 1.000000 |
| rad31 | 2.52438e-09 | 1.000000 | 2.52715e-09 | 1.000000 |

10000.0000 Pa, 20.0000000 K

=====

| Rate constant             | True (fraction)         | Effective (fraction)    |
|---------------------------|-------------------------|-------------------------|
| Total                     | 1.24541e-22 (1.00 )     | 1.24541e-22 (1.00 )     |
| Formation of rad19        | 1.24541e-22 (1.00 )     | 1.24541e-22 (1.00 )     |
| H-abstraction to cyc2enyl | 3.84323e-68 (3.09e-46)  | 3.84323e-68 (3.09e-46)  |
| H-abstraction to cyclenyl | 6.26313e-106 (5.03e-84) | 6.26313e-106 (5.03e-84) |

| species        | PYtrue      | Cumul    | PYeffective | Cumul    |
|----------------|-------------|----------|-------------|----------|
| rad9           | 0.995369    | 0.995369 | 0.995369    | 0.995369 |
| rad15          | 0.00356154  | 0.998931 | 0.00356154  | 0.998931 |
| Indene+H       | 0.00103985  | 0.999970 | 0.00103985  | 0.999970 |
| rad19anti      | 2.90161e-05 | 0.999999 | 2.90161e-05 | 0.999999 |
| PhCHCCH2+H     | 1.39772e-07 | 1.000000 | 1.39772e-07 | 1.000000 |
| rad12          | 1.08312e-07 | 1.000000 | 1.08312e-07 | 1.000000 |
| rad11          | 6.10263e-09 | 1.000000 | 6.10263e-09 | 1.000000 |
| rad2           | 5.32798e-09 | 1.000000 | 5.32798e-09 | 1.000000 |
| rad18          | 2.56488e-09 | 1.000000 | 2.56488e-09 | 1.000000 |
| rad6           | 8.57210e-10 | 1.000000 | 8.57210e-10 | 1.000000 |
| rad26          | 8.11312e-10 | 1.000000 | 8.11312e-10 | 1.000000 |
| rad22          | 7.95533e-10 | 1.000000 | 7.95533e-10 | 1.000000 |
| rad1           | 3.77686e-10 | 1.000000 | 3.77686e-10 | 1.000000 |
| rad20          | 1.32543e-10 | 1.000000 | 1.32543e-10 | 1.000000 |
| rad67          | 1.26224e-10 | 1.000000 | 1.26224e-10 | 1.000000 |
| C2H2+PhCH2     | 1.19929e-10 | 1.000000 | 1.19929e-10 | 1.000000 |
| rad45          | 1.17989e-10 | 1.000000 | 1.17989e-10 | 1.000000 |
| rad21          | 9.14060e-11 | 1.000000 | 9.14060e-11 | 1.000000 |
| rad35          | 5.77390e-11 | 1.000000 | 5.77390e-11 | 1.000000 |
| rad7           | 5.41923e-11 | 1.000000 | 5.41923e-11 | 1.000000 |
| rad10          | 2.24722e-11 | 1.000000 | 2.24722e-11 | 1.000000 |
| rad23          | 1.69039e-11 | 1.000000 | 1.69039e-11 | 1.000000 |
| rad36          | 7.45407e-12 | 1.000000 | 7.45407e-12 | 1.000000 |
| rad3           | 5.87772e-12 | 1.000000 | 5.87772e-12 | 1.000000 |
| rad4           | 3.10077e-12 | 1.000000 | 3.10077e-12 | 1.000000 |
| PhCCCH3+H      | 1.46283e-12 | 1.000000 | 1.46283e-12 | 1.000000 |
| rad5           | 8.95809e-13 | 1.000000 | 8.95809e-13 | 1.000000 |
| Ph+MeAc        | 8.50286e-13 | 1.000000 | 8.50286e-13 | 1.000000 |
| rad30          | 5.44174e-13 | 1.000000 | 5.44174e-13 | 1.000000 |
| Ph+Allene      | 3.56595e-13 | 1.000000 | 3.56595e-13 | 1.000000 |
| PhcycC3H3_A+H  | 2.80467e-13 | 1.000000 | 2.80467e-13 | 1.000000 |
| rad25          | 2.44071e-13 | 1.000000 | 2.44071e-13 | 1.000000 |
| PhCCH+CH3      | 1.21035e-13 | 1.000000 | 1.21035e-13 | 1.000000 |
| rad27          | 9.05810e-14 | 1.000000 | 9.05810e-14 | 1.000000 |
| PhCH2CCH+H     | 5.29275e-14 | 1.000000 | 5.29275e-14 | 1.000000 |
| rad13          | 2.64036e-14 | 1.000000 | 2.64036e-14 | 1.000000 |
| rad60syn       | 1.57235e-15 | 1.000000 | 1.57235e-15 | 1.000000 |
| rad24          | 1.21189e-15 | 1.000000 | 1.21189e-15 | 1.000000 |
| rad14          | 1.08753e-15 | 1.000000 | 1.08753e-15 | 1.000000 |
| rad60anti      | 7.44636e-16 | 1.000000 | 7.44636e-16 | 1.000000 |
| rad37          | 6.36307e-16 | 1.000000 | 6.36307e-16 | 1.000000 |
| PAH3+H         | 4.37912e-16 | 1.000000 | 4.37912e-16 | 1.000000 |
| rad28          | 3.58171e-16 | 1.000000 | 3.58171e-16 | 1.000000 |
| rad59          | 9.47078e-17 | 1.000000 | 9.47078e-17 | 1.000000 |
| PAH7+H         | 8.19403e-17 | 1.000000 | 8.19403e-17 | 1.000000 |
| rad33          | 6.03905e-17 | 1.000000 | 6.03905e-17 | 1.000000 |
| Phenyl+cycC3H4 | 2.78226e-17 | 1.000000 | 0.00000     | 1.000000 |
| rad38          | 1.08783e-17 | 1.000000 | 1.08783e-17 | 1.000000 |
| PAH9+H         | 7.30335e-19 | 1.000000 | 7.30335e-19 | 1.000000 |
| rad46          | 5.15575e-19 | 1.000000 | 5.15575e-19 | 1.000000 |
| PAH10+CH3      | 3.84892e-19 | 1.000000 | 3.84892e-19 | 1.000000 |
| rad31          | 1.07719e-19 | 1.000000 | 1.07719e-19 | 1.000000 |
| rad43          | 2.98232e-20 | 1.000000 | 2.98232e-20 | 1.000000 |
| PhcycC3H3_B+H  | 4.76218e-21 | 1.000000 | 4.76218e-21 | 1.000000 |
| rad58          | 2.31607e-21 | 1.000000 | 2.31607e-21 | 1.000000 |
| rad50          | 1.81763e-21 | 1.000000 | 1.81763e-21 | 1.000000 |
| rad70          | 1.60317e-21 | 1.000000 | 1.60317e-21 | 1.000000 |
| rad39          | 6.78023e-22 | 1.000000 | 6.78023e-22 | 1.000000 |
| rad62          | 7.12203e-23 | 1.000000 | 7.12203e-23 | 1.000000 |
| rad54          | 1.94619e-23 | 1.000000 | 1.94619e-23 | 1.000000 |

|                               |             |          |             |          |
|-------------------------------|-------------|----------|-------------|----------|
| rad34                         | 1.05641e-23 | 1.000000 | 1.05641e-23 | 1.000000 |
| PAH1+H                        | 1.03516e-23 | 1.000000 | 1.03516e-23 | 1.000000 |
| rad52                         | 8.36341e-24 | 1.000000 | 8.36341e-24 | 1.000000 |
| rad51                         | 1.53721e-24 | 1.000000 | 1.53721e-24 | 1.000000 |
| rad41                         | 1.37809e-25 | 1.000000 | 1.37809e-25 | 1.000000 |
| rad55                         | 9.34795e-26 | 1.000000 | 9.34795e-26 | 1.000000 |
| rad47                         | 5.46237e-27 | 1.000000 | 5.46237e-27 | 1.000000 |
| rad42                         | 1.54389e-27 | 1.000000 | 1.54389e-27 | 1.000000 |
| rad65                         | 5.51728e-28 | 1.000000 | 5.51728e-28 | 1.000000 |
| rad8                          | 1.15682e-30 | 1.000000 | 1.15682e-30 | 1.000000 |
| rad53                         | 1.46520e-33 | 1.000000 | 1.46520e-33 | 1.000000 |
| rad19syn                      | 2.17008e-35 | 1.000000 | 2.17008e-35 | 1.000000 |
| rad61                         | 6.37384e-36 | 1.000000 | 6.37384e-36 | 1.000000 |
| rad64                         | 7.11343e-38 | 1.000000 | 7.11343e-38 | 1.000000 |
| rad68syn                      | 1.48116e-38 | 1.000000 | 1.48116e-38 | 1.000000 |
| rad68anti                     | 1.21236e-38 | 1.000000 | 1.21236e-38 | 1.000000 |
| rad56                         | 2.20995e-40 | 1.000000 | 2.20995e-40 | 1.000000 |
| rad40syn                      | 2.73707e-44 | 1.000000 | 2.73707e-44 | 1.000000 |
| rad40anti                     | 2.12428e-44 | 1.000000 | 2.12428e-44 | 1.000000 |
| rad73                         | 7.33564e-46 | 1.000000 | 7.33564e-46 | 1.000000 |
| Benzene+cycloprop-2-enylidene | 3.08591e-46 | 1.000000 | 3.08591e-46 | 1.000000 |
| PAH8+H                        | 3.98466e-47 | 1.000000 | 3.98466e-47 | 1.000000 |
| rad71                         | 1.59382e-51 | 1.000000 | 1.59382e-51 | 1.000000 |
| Benzene+cycloprop-1-enylidene | 5.02895e-84 | 1.000000 | 5.02895e-84 | 1.000000 |

10000.0000 Pa, 30.0000000 K

| Rate constant             | True (fraction)        | Effective (fraction)   |
|---------------------------|------------------------|------------------------|
| Total                     | 8.13009e-20 (1.00 )    | 8.13009e-20 (1.00 )    |
| Formation of rad19        | 8.13009e-20 (1.00 )    | 8.13009e-20 (1.00 )    |
| H-abstraction to cyc2enyl | 1.08880e-49 (1.34e-30) | 1.08880e-49 (1.34e-30) |
| H-abstraction to cyclenyl | 7.55172e-75 (9.29e-56) | 7.55172e-75 (9.29e-56) |

| species       | PYtrue      | Cumul    | PYeffective | Cumul    |
|---------------|-------------|----------|-------------|----------|
| rad9          | 0.994003    | 0.994003 | 0.994003    | 0.994003 |
| rad15         | 0.00335570  | 0.997359 | 0.00335570  | 0.997359 |
| Indene+H      | 0.00264028  | 0.999999 | 0.00264028  | 0.999999 |
| PhCHCCH2+H    | 3.08429e-07 | 0.999999 | 3.08429e-07 | 0.999999 |
| rad19anti     | 2.05729e-07 | 0.999999 | 2.05729e-07 | 0.999999 |
| rad12         | 5.94559e-08 | 1.000000 | 5.94559e-08 | 1.000000 |
| rad2          | 1.17741e-08 | 1.000000 | 1.17741e-08 | 1.000000 |
| rad11         | 1.16932e-08 | 1.000000 | 1.16932e-08 | 1.000000 |
| rad6          | 3.53217e-09 | 1.000000 | 3.53217e-09 | 1.000000 |
| rad22         | 2.59310e-09 | 1.000000 | 2.59310e-09 | 1.000000 |
| rad18         | 2.28806e-09 | 1.000000 | 2.28806e-09 | 1.000000 |
| rad26         | 1.80556e-09 | 1.000000 | 1.80556e-09 | 1.000000 |
| rad1          | 7.98665e-10 | 1.000000 | 7.98665e-10 | 1.000000 |
| C2H2+PhCH2    | 5.24630e-10 | 1.000000 | 5.24630e-10 | 1.000000 |
| rad45         | 4.12219e-10 | 1.000000 | 4.12219e-10 | 1.000000 |
| rad67         | 3.86873e-10 | 1.000000 | 3.86873e-10 | 1.000000 |
| rad35         | 1.76107e-10 | 1.000000 | 1.76107e-10 | 1.000000 |
| rad23         | 1.29516e-10 | 1.000000 | 1.29516e-10 | 1.000000 |
| rad20         | 1.26800e-10 | 1.000000 | 1.26800e-10 | 1.000000 |
| rad10         | 1.00229e-10 | 1.000000 | 1.00229e-10 | 1.000000 |
| rad21         | 8.76970e-11 | 1.000000 | 8.76970e-11 | 1.000000 |
| rad7          | 4.18141e-11 | 1.000000 | 4.18141e-11 | 1.000000 |
| rad36         | 2.56662e-11 | 1.000000 | 2.56662e-11 | 1.000000 |
| rad3          | 2.56097e-11 | 1.000000 | 2.56097e-11 | 1.000000 |
| rad4          | 1.32888e-11 | 1.000000 | 1.32888e-11 | 1.000000 |
| PhCCCH3+H     | 6.76935e-12 | 1.000000 | 6.76935e-12 | 1.000000 |
| Ph+MeAc       | 3.96617e-12 | 1.000000 | 3.96617e-12 | 1.000000 |
| rad30         | 2.24197e-12 | 1.000000 | 2.24197e-12 | 1.000000 |
| rad5          | 1.85788e-12 | 1.000000 | 1.85788e-12 | 1.000000 |
| Ph+Allene     | 1.57092e-12 | 1.000000 | 1.57092e-12 | 1.000000 |
| PhCCH+CH3     | 1.03671e-12 | 1.000000 | 1.03671e-12 | 1.000000 |
| rad25         | 5.40028e-13 | 1.000000 | 5.40028e-13 | 1.000000 |
| PhcycC3H3_A+H | 3.54252e-13 | 1.000000 | 3.54252e-13 | 1.000000 |
| PhCH2CCH+H    | 2.36381e-13 | 1.000000 | 2.36381e-13 | 1.000000 |
| rad27         | 1.92644e-13 | 1.000000 | 1.92644e-13 | 1.000000 |
| rad13         | 7.69235e-14 | 1.000000 | 7.69235e-14 | 1.000000 |
| rad14         | 7.48739e-15 | 1.000000 | 7.48739e-15 | 1.000000 |
| rad60syn      | 7.00994e-15 | 1.000000 | 7.00994e-15 | 1.000000 |
| rad60anti     | 3.33899e-15 | 1.000000 | 3.33899e-15 | 1.000000 |
| rad37         | 3.01334e-15 | 1.000000 | 3.01334e-15 | 1.000000 |
| rad28         | 2.36113e-15 | 1.000000 | 2.36113e-15 | 1.000000 |
| PAH3+H        | 2.08549e-15 | 1.000000 | 2.08549e-15 | 1.000000 |
| PAH7+H        | 5.22764e-16 | 1.000000 | 5.22764e-16 | 1.000000 |
| rad59         | 4.47716e-16 | 1.000000 | 4.47716e-16 | 1.000000 |

|                               |             |          |             |          |
|-------------------------------|-------------|----------|-------------|----------|
| rad24                         | 3.52995e-16 | 1.000000 | 3.52995e-16 | 1.000000 |
| rad33                         | 1.44748e-16 | 1.000000 | 1.44748e-16 | 1.000000 |
| rad38                         | 8.67295e-17 | 1.000000 | 8.67295e-17 | 1.000000 |
| Phenyl+cycC3H4                | 5.25975e-17 | 1.000000 | 0.000000    | 1.000000 |
| PAH9+H                        | 1.26733e-17 | 1.000000 | 1.26733e-17 | 1.000000 |
| rad46                         | 4.36065e-18 | 1.000000 | 4.36065e-18 | 1.000000 |
| PAH10+CH3                     | 1.89221e-18 | 1.000000 | 1.89221e-18 | 1.000000 |
| rad31                         | 2.20963e-19 | 1.000000 | 2.20963e-19 | 1.000000 |
| rad43                         | 2.07054e-19 | 1.000000 | 2.07054e-19 | 1.000000 |
| rad50                         | 1.57773e-20 | 1.000000 | 1.57773e-20 | 1.000000 |
| rad58                         | 1.26757e-20 | 1.000000 | 1.26757e-20 | 1.000000 |
| rad70                         | 1.15805e-20 | 1.000000 | 1.15805e-20 | 1.000000 |
| rad39                         | 8.52499e-21 | 1.000000 | 8.52499e-21 | 1.000000 |
| PhcycC3H3_B+H                 | 2.94881e-21 | 1.000000 | 2.94881e-21 | 1.000000 |
| rad62                         | 1.18841e-21 | 1.000000 | 1.18841e-21 | 1.000000 |
| rad54                         | 1.92835e-22 | 1.000000 | 1.92835e-22 | 1.000000 |
| rad34                         | 7.98269e-23 | 1.000000 | 7.98269e-23 | 1.000000 |
| rad52                         | 7.36482e-23 | 1.000000 | 7.36482e-23 | 1.000000 |
| PAH1+H                        | 5.33516e-23 | 1.000000 | 5.33516e-23 | 1.000000 |
| rad51                         | 1.37104e-23 | 1.000000 | 1.37104e-23 | 1.000000 |
| rad41                         | 1.08076e-24 | 1.000000 | 1.08076e-24 | 1.000000 |
| rad55                         | 9.51723e-25 | 1.000000 | 9.51723e-25 | 1.000000 |
| rad42                         | 2.76480e-26 | 1.000000 | 2.76480e-26 | 1.000000 |
| rad47                         | 2.20823e-26 | 1.000000 | 2.20823e-26 | 1.000000 |
| rad65                         | 1.04316e-26 | 1.000000 | 1.04316e-26 | 1.000000 |
| Benzene+cycloprop-2-enylidene | 1.33923e-30 | 1.000000 | 1.33923e-30 | 1.000000 |
| rad53                         | 1.57882e-32 | 1.000000 | 1.57882e-32 | 1.000000 |
| rad61                         | 3.53118e-35 | 1.000000 | 3.53118e-35 | 1.000000 |
| rad8                          | 1.34925e-35 | 1.000000 | 1.34925e-35 | 1.000000 |
| rad19syn                      | 1.05395e-35 | 1.000000 | 1.05395e-35 | 1.000000 |
| rad64                         | 1.00778e-36 | 1.000000 | 1.00778e-36 | 1.000000 |
| rad68syn                      | 8.57458e-38 | 1.000000 | 8.57458e-38 | 1.000000 |
| rad68anti                     | 7.02164e-38 | 1.000000 | 7.02164e-38 | 1.000000 |
| rad56                         | 2.26669e-39 | 1.000000 | 2.26669e-39 | 1.000000 |
| rad40syn                      | 1.82994e-43 | 1.000000 | 1.82994e-43 | 1.000000 |
| rad40anti                     | 1.42882e-43 | 1.000000 | 1.42882e-43 | 1.000000 |
| rad73                         | 5.82625e-45 | 1.000000 | 5.82625e-45 | 1.000000 |
| PAH8+H                        | 2.54511e-46 | 1.000000 | 2.54511e-46 | 1.000000 |
| rad71                         | 1.23220e-50 | 1.000000 | 1.23220e-50 | 1.000000 |
| Benzene+cycloprop-1-enylidene | 9.28861e-56 | 1.000000 | 9.28861e-56 | 1.000000 |

10000.0000 Pa, 40.0000000 K

| Rate constant             | True (fraction)        | Effective (fraction)   |
|---------------------------|------------------------|------------------------|
| Total                     | 2.24819e-18 (1.00)     | 2.24819e-18 (1.00)     |
| Formation of rad19        | 2.24819e-18 (1.00)     | 2.24819e-18 (1.00)     |
| H-abstraction to cyc2enyl | 1.72361e-40 (7.67e-23) | 1.72361e-40 (7.67e-23) |
| H-abstraction to cyclenyl | 2.48792e-59 (1.11e-41) | 2.48792e-59 (1.11e-41) |

| species    | PYtrue      | Cumul    | PYeffective | Cumul    |
|------------|-------------|----------|-------------|----------|
| rad9       | 0.992663    | 0.992663 | 0.992663    | 0.992663 |
| Indene+H   | 0.00421703  | 0.996880 | 0.00421703  | 0.996880 |
| rad15      | 0.00311893  | 0.999999 | 0.00311893  | 0.999999 |
| PhCHCCH2+H | 4.79008e-07 | 0.999999 | 4.79008e-07 | 0.999999 |
| rad19anti  | 5.54634e-08 | 0.999999 | 5.54634e-08 | 0.999999 |
| rad12      | 4.39227e-08 | 1.000000 | 4.39227e-08 | 1.000000 |
| rad2       | 1.82576e-08 | 1.000000 | 1.82576e-08 | 1.000000 |
| rad11      | 1.58646e-08 | 1.000000 | 1.58646e-08 | 1.000000 |
| rad6       | 7.58710e-09 | 1.000000 | 7.58710e-09 | 1.000000 |
| rad22      | 4.24765e-09 | 1.000000 | 4.24765e-09 | 1.000000 |
| rad26      | 2.81418e-09 | 1.000000 | 2.81418e-09 | 1.000000 |
| rad18      | 1.60312e-09 | 1.000000 | 1.60312e-09 | 1.000000 |
| rad1       | 1.21718e-09 | 1.000000 | 1.21718e-09 | 1.000000 |
| C2H2+PhCH2 | 1.06184e-09 | 1.000000 | 1.06184e-09 | 1.000000 |
| rad45      | 7.29468e-10 | 1.000000 | 7.29468e-10 | 1.000000 |
| rad67      | 6.84868e-10 | 1.000000 | 6.84868e-10 | 1.000000 |
| rad23      | 3.59444e-10 | 1.000000 | 3.59444e-10 | 1.000000 |
| rad35      | 3.10817e-10 | 1.000000 | 3.10817e-10 | 1.000000 |
| rad10      | 2.29406e-10 | 1.000000 | 2.29406e-10 | 1.000000 |
| rad20      | 8.93601e-11 | 1.000000 | 8.93601e-11 | 1.000000 |
| rad21      | 6.17174e-11 | 1.000000 | 6.17174e-11 | 1.000000 |
| rad3       | 5.71389e-11 | 1.000000 | 5.71389e-11 | 1.000000 |
| rad36      | 4.51877e-11 | 1.000000 | 4.51877e-11 | 1.000000 |
| rad7       | 3.50672e-11 | 1.000000 | 3.50672e-11 | 1.000000 |
| rad4       | 2.94508e-11 | 1.000000 | 2.94508e-11 | 1.000000 |
| PhCCCH3+H  | 1.60406e-11 | 1.000000 | 1.60406e-11 | 1.000000 |
| Ph+MeAc    | 9.47181e-12 | 1.000000 | 9.47181e-12 | 1.000000 |
| rad30      | 4.40178e-12 | 1.000000 | 4.40178e-12 | 1.000000 |

|                               |             |          |             |          |
|-------------------------------|-------------|----------|-------------|----------|
| Ph+Allene                     | 3.55255e-12 | 1.000000 | 3.55255e-12 | 1.000000 |
| PhCCH+CH3                     | 3.49542e-12 | 1.000000 | 3.49542e-12 | 1.000000 |
| rad5                          | 2.85764e-12 | 1.000000 | 2.85764e-12 | 1.000000 |
| rad25                         | 7.22317e-13 | 1.000000 | 7.22317e-13 | 1.000000 |
| PhCH2CCH+H                    | 5.40871e-13 | 1.000000 | 5.40871e-13 | 1.000000 |
| PhcycC3H3_A+H                 | 4.27043e-13 | 1.000000 | 4.27043e-13 | 1.000000 |
| rad27                         | 2.66552e-13 | 1.000000 | 2.66552e-13 | 1.000000 |
| rad13                         | 1.34495e-13 | 1.000000 | 1.34495e-13 | 1.000000 |
| rad14                         | 2.01922e-14 | 1.000000 | 2.01922e-14 | 1.000000 |
| rad60syn                      | 1.44595e-14 | 1.000000 | 1.44595e-14 | 1.000000 |
| rad37                         | 7.24745e-15 | 1.000000 | 7.24745e-15 | 1.000000 |
| rad28                         | 7.05882e-15 | 1.000000 | 7.05882e-15 | 1.000000 |
| rad60anti                     | 6.91311e-15 | 1.000000 | 6.91311e-15 | 1.000000 |
| PAH3+H                        | 4.49603e-15 | 1.000000 | 4.49603e-15 | 1.000000 |
| PAH7+H                        | 1.38164e-15 | 1.000000 | 1.38164e-15 | 1.000000 |
| rad59                         | 9.60193e-16 | 1.000000 | 9.60193e-16 | 1.000000 |
| rad38                         | 2.65754e-16 | 1.000000 | 2.65754e-16 | 1.000000 |
| rad33                         | 2.32346e-16 | 1.000000 | 2.32346e-16 | 1.000000 |
| rad24                         | 1.50983e-16 | 1.000000 | 1.50983e-16 | 1.000000 |
| Phenyl+cycC3H4                | 1.15744e-16 | 1.000000 | 0.00000     | 1.000000 |
| PAH9+H                        | 5.82952e-17 | 1.000000 | 5.82952e-17 | 1.000000 |
| rad46                         | 1.37593e-17 | 1.000000 | 1.37593e-17 | 1.000000 |
| PAH10+CH3                     | 4.72827e-18 | 1.000000 | 4.72827e-18 | 1.000000 |
| rad43                         | 5.95404e-19 | 1.000000 | 5.95404e-19 | 1.000000 |
| rad31                         | 3.38787e-19 | 1.000000 | 3.38787e-19 | 1.000000 |
| rad50                         | 5.18010e-20 | 1.000000 | 5.18010e-20 | 1.000000 |
| rad39                         | 3.75222e-20 | 1.000000 | 3.75222e-20 | 1.000000 |
| rad70                         | 3.39279e-20 | 1.000000 | 3.39279e-20 | 1.000000 |
| rad58                         | 3.04631e-20 | 1.000000 | 3.04631e-20 | 1.000000 |
| rad62                         | 5.68157e-21 | 1.000000 | 5.68157e-21 | 1.000000 |
| PhcycC3H3_B+H                 | 4.08431e-21 | 1.000000 | 4.08431e-21 | 1.000000 |
| rad54                         | 7.03198e-22 | 1.000000 | 7.03198e-22 | 1.000000 |
| rad52                         | 2.47491e-22 | 1.000000 | 2.47491e-22 | 1.000000 |
| rad34                         | 2.46223e-22 | 1.000000 | 2.46223e-22 | 1.000000 |
| PAH1+H                        | 1.41654e-22 | 1.000000 | 1.41654e-22 | 1.000000 |
| Benzene+cycloprop-2-enylidene | 7.66665e-23 | 1.000000 | 7.66665e-23 | 1.000000 |
| rad51                         | 4.71572e-23 | 1.000000 | 4.71572e-23 | 1.000000 |
| rad41                         | 3.60534e-24 | 1.000000 | 3.60534e-24 | 1.000000 |
| rad55                         | 3.57128e-24 | 1.000000 | 3.57128e-24 | 1.000000 |
| rad42                         | 1.48034e-25 | 1.000000 | 1.48034e-25 | 1.000000 |
| rad65                         | 5.36261e-26 | 1.000000 | 5.36261e-26 | 1.000000 |
| rad47                         | 4.54366e-26 | 1.000000 | 4.54366e-26 | 1.000000 |
| rad53                         | 7.79651e-32 | 1.000000 | 7.79651e-32 | 1.000000 |
| rad61                         | 1.39834e-34 | 1.000000 | 1.39834e-34 | 1.000000 |
| rad19syn                      | 1.00469e-35 | 1.000000 | 1.00469e-35 | 1.000000 |
| rad64                         | 6.39220e-36 | 1.000000 | 6.39220e-36 | 1.000000 |
| rad68syn                      | 3.37796e-37 | 1.000000 | 3.37796e-37 | 1.000000 |
| rad68anti                     | 2.76547e-37 | 1.000000 | 2.76547e-37 | 1.000000 |
| rad8                          | 5.25172e-38 | 1.000000 | 5.25172e-38 | 1.000000 |
| rad56                         | 1.22937e-38 | 1.000000 | 1.22937e-38 | 1.000000 |
| Benzene+cycloprop-1-enylidene | 1.10663e-41 | 1.000000 | 1.10663e-41 | 1.000000 |
| rad40syn                      | 9.39758e-43 | 1.000000 | 9.39758e-43 | 1.000000 |
| rad40anti                     | 7.36900e-43 | 1.000000 | 7.36900e-43 | 1.000000 |
| rad73                         | 3.03137e-44 | 1.000000 | 3.03137e-44 | 1.000000 |
| PAH8+H                        | 1.33154e-45 | 1.000000 | 1.33154e-45 | 1.000000 |
| rad71                         | 7.03541e-50 | 1.000000 | 7.03541e-50 | 1.000000 |

10000.0000 Pa, 50.0000000 K

=====

| Rate constant             | True (fraction)        | Effective (fraction)   |
|---------------------------|------------------------|------------------------|
| Total                     | 1.72707e-17 (1.00 )    | 1.72707e-17 (1.00 )    |
| Formation of rad19        | 1.72707e-17 (1.00 )    | 1.72707e-17 (1.00 )    |
| H-abstraction to cyc2enyl | 5.49905e-35 (3.18e-18) | 5.49905e-35 (3.18e-18) |
| H-abstraction to cyc1enyl | 4.93090e-50 (2.86e-33) | 4.93090e-50 (2.86e-33) |

| species    | PYtrue      | Cumul    | PYeffective | Cumul    |
|------------|-------------|----------|-------------|----------|
| rad9       | 0.991279    | 0.991279 | 0.991279    | 0.991279 |
| Indene+H   | 0.00576702  | 0.997046 | 0.00576702  | 0.997046 |
| rad15      | 0.00295345  | 0.999999 | 0.00295345  | 0.999999 |
| PhCHCCH2+H | 6.54982e-07 | 1.00000  | 6.54982e-07 | 1.00000  |
| rad19anti  | 4.12947e-08 | 1.00000  | 4.12947e-08 | 1.00000  |
| rad12      | 3.61408e-08 | 1.00000  | 3.61408e-08 | 1.00000  |
| rad2       | 2.49149e-08 | 1.00000  | 2.49149e-08 | 1.00000  |
| rad11      | 1.90493e-08 | 1.00000  | 1.90493e-08 | 1.00000  |
| rad6       | 1.27915e-08 | 1.00000  | 1.27915e-08 | 1.00000  |
| rad22      | 5.62442e-09 | 1.00000  | 5.62442e-09 | 1.00000  |
| rad26      | 3.85801e-09 | 1.00000  | 3.85801e-09 | 1.00000  |
| C2H2+PhCH2 | 1.67534e-09 | 1.00000  | 1.67534e-09 | 1.00000  |

|                               |             |         |             |         |
|-------------------------------|-------------|---------|-------------|---------|
| rad1                          | 1.64656e-09 | 1.00000 | 1.64656e-09 | 1.00000 |
| rad18                         | 1.14073e-09 | 1.00000 | 1.14073e-09 | 1.00000 |
| rad45                         | 1.04013e-09 | 1.00000 | 1.04013e-09 | 1.00000 |
| rad67                         | 1.00860e-09 | 1.00000 | 1.00860e-09 | 1.00000 |
| rad23                         | 6.97303e-10 | 1.00000 | 6.97303e-10 | 1.00000 |
| rad35                         | 4.56640e-10 | 1.00000 | 4.56640e-10 | 1.00000 |
| rad10                         | 4.09876e-10 | 1.00000 | 4.09876e-10 | 1.00000 |
| rad3                          | 9.95173e-11 | 1.00000 | 9.95173e-11 | 1.00000 |
| rad36                         | 6.42518e-11 | 1.00000 | 6.42518e-11 | 1.00000 |
| rad20                         | 6.40472e-11 | 1.00000 | 6.40472e-11 | 1.00000 |
| rad4                          | 5.11113e-11 | 1.00000 | 5.11113e-11 | 1.00000 |
| rad21                         | 4.41966e-11 | 1.00000 | 4.41966e-11 | 1.00000 |
| rad7                          | 3.22129e-11 | 1.00000 | 3.22129e-11 | 1.00000 |
| PhCCCH3+H                     | 2.96915e-11 | 1.00000 | 2.96915e-11 | 1.00000 |
| Ph+MeAc                       | 1.76797e-11 | 1.00000 | 1.76797e-11 | 1.00000 |
| PhCCH+CH3                     | 8.26049e-12 | 1.00000 | 8.26049e-12 | 1.00000 |
| rad30                         | 6.81976e-12 | 1.00000 | 6.81976e-12 | 1.00000 |
| Ph+Allene                     | 6.29220e-12 | 1.00000 | 6.29220e-12 | 1.00000 |
| rad5                          | 3.92385e-12 | 1.00000 | 3.92385e-12 | 1.00000 |
| PhCH2CCH+H                    | 9.69446e-13 | 1.00000 | 9.69446e-13 | 1.00000 |
| rad25                         | 8.32616e-13 | 1.00000 | 8.32616e-13 | 1.00000 |
| PhcycC3H3_A+H                 | 5.15990e-13 | 1.00000 | 5.15990e-13 | 1.00000 |
| rad27                         | 3.28274e-13 | 1.00000 | 3.28274e-13 | 1.00000 |
| rad13                         | 1.96654e-13 | 1.00000 | 1.96654e-13 | 1.00000 |
| rad14                         | 3.88425e-14 | 1.00000 | 3.88425e-14 | 1.00000 |
| rad60syn                      | 2.32308e-14 | 1.00000 | 2.32308e-14 | 1.00000 |
| rad28                         | 1.55066e-14 | 1.00000 | 1.55066e-14 | 1.00000 |
| rad37                         | 1.35991e-14 | 1.00000 | 1.35991e-14 | 1.00000 |
| rad60anti                     | 1.11382e-14 | 1.00000 | 1.11382e-14 | 1.00000 |
| PAH3+H                        | 7.47889e-15 | 1.00000 | 7.47889e-15 | 1.00000 |
| PAH7+H                        | 2.67813e-15 | 1.00000 | 2.67813e-15 | 1.00000 |
| rad59                         | 1.59037e-15 | 1.00000 | 1.59037e-15 | 1.00000 |
| rad38                         | 5.69098e-16 | 1.00000 | 5.69098e-16 | 1.00000 |
| rad33                         | 3.22543e-16 | 1.00000 | 3.22543e-16 | 1.00000 |
| Phenyl+cycC3H4                | 2.36646e-16 | 1.00000 | 0.00000     | 1.00000 |
| PAH9+H                        | 1.63933e-16 | 1.00000 | 1.63933e-16 | 1.00000 |
| rad24                         | 1.02459e-16 | 1.00000 | 1.02459e-16 | 1.00000 |
| rad46                         | 3.00687e-17 | 1.00000 | 3.00687e-17 | 1.00000 |
| PAH10+CH3                     | 9.26151e-18 | 1.00000 | 9.26151e-18 | 1.00000 |
| Benzene+cycloprop-2-enylidene | 3.18404e-18 | 1.00000 | 3.18404e-18 | 1.00000 |
| rad43                         | 1.25879e-18 | 1.00000 | 1.25879e-18 | 1.00000 |
| rad31                         | 4.65586e-19 | 1.00000 | 4.65586e-19 | 1.00000 |
| rad50                         | 1.17912e-19 | 1.00000 | 1.17912e-19 | 1.00000 |
| rad39                         | 1.10091e-19 | 1.00000 | 1.10091e-19 | 1.00000 |
| rad70                         | 7.24293e-20 | 1.00000 | 7.24293e-20 | 1.00000 |
| rad58                         | 5.58099e-20 | 1.00000 | 5.58099e-20 | 1.00000 |
| rad62                         | 1.71771e-20 | 1.00000 | 1.71771e-20 | 1.00000 |
| PhcycC3H3_B+H                 | 9.53271e-21 | 1.00000 | 9.53271e-21 | 1.00000 |
| rad54                         | 1.77904e-21 | 1.00000 | 1.77904e-21 | 1.00000 |
| rad52                         | 5.77920e-22 | 1.00000 | 5.77920e-22 | 1.00000 |
| rad34                         | 5.55678e-22 | 1.00000 | 5.55678e-22 | 1.00000 |
| PAH1+H                        | 2.98076e-22 | 1.00000 | 2.98076e-22 | 1.00000 |
| rad51                         | 1.13141e-22 | 1.00000 | 1.13141e-22 | 1.00000 |
| rad55                         | 9.32739e-24 | 1.00000 | 9.32739e-24 | 1.00000 |
| rad41                         | 8.99220e-24 | 1.00000 | 8.99220e-24 | 1.00000 |
| rad42                         | 5.13490e-25 | 1.00000 | 5.13490e-25 | 1.00000 |
| rad65                         | 1.69822e-25 | 1.00000 | 1.69822e-25 | 1.00000 |
| rad47                         | 7.32945e-26 | 1.00000 | 7.32945e-26 | 1.00000 |
| rad53                         | 3.06663e-31 | 1.00000 | 3.06663e-31 | 1.00000 |
| Benzene+cycloprop-1-enylidene | 2.85507e-33 | 1.00000 | 2.85507e-33 | 1.00000 |
| rad61                         | 5.34896e-34 | 1.00000 | 5.34896e-34 | 1.00000 |
| rad64                         | 3.15348e-35 | 1.00000 | 3.15348e-35 | 1.00000 |
| rad19syn                      | 1.30002e-35 | 1.00000 | 1.30002e-35 | 1.00000 |
| rad68syn                      | 1.31462e-36 | 1.00000 | 1.31462e-36 | 1.00000 |
| rad68anti                     | 1.07553e-36 | 1.00000 | 1.07553e-36 | 1.00000 |
| rad56                         | 5.82370e-38 | 1.00000 | 5.82370e-38 | 1.00000 |
| rad8                          | 1.71119e-39 | 1.00000 | 1.71119e-39 | 1.00000 |
| rad40syn                      | 5.10067e-42 | 1.00000 | 5.10067e-42 | 1.00000 |
| rad40anti                     | 4.01252e-42 | 1.00000 | 4.01252e-42 | 1.00000 |
| rad73                         | 1.56557e-43 | 1.00000 | 1.56557e-43 | 1.00000 |
| PAH8+H                        | 7.68283e-45 | 1.00000 | 7.68283e-45 | 1.00000 |
| rad71                         | 4.25972e-49 | 1.00000 | 4.25972e-49 | 1.00000 |

10000.0000 Pa, 60.0000000 K

| Rate constant             | True (fraction)        | Effective (fraction)   |
|---------------------------|------------------------|------------------------|
| Total                     | 6.93738e-17 (1.00)     | 6.93738e-17 (1.00)     |
| Formation of rad19        | 6.93738e-17 (1.000)    | 6.93738e-17 (1.000)    |
| H-abstraction to cyc2enyl | 2.50609e-31 (3.61e-15) | 2.50609e-31 (3.61e-15) |

H-abstraction to cyclenyl | 7.62015e-44 (1.10e-27) 7.62015e-44 (1.10e-27)

| species                       | PYtrue      | Cumul    | PYeffective | Cumul    |
|-------------------------------|-------------|----------|-------------|----------|
| rad9                          | 0.989864    | 0.989864 | 0.989864    | 0.989864 |
| Indene+H                      | 0.00730292  | 0.997167 | 0.00730292  | 0.997167 |
| rad15                         | 0.00283195  | 0.999999 | 0.00283195  | 0.999999 |
| PhCHCCH2+H                    | 8.38553e-07 | 1.000000 | 8.38553e-07 | 1.000000 |
| rad19anti                     | 3.48872e-08 | 1.000000 | 3.48872e-08 | 1.000000 |
| rad2                          | 3.18316e-08 | 1.000000 | 3.18316e-08 | 1.000000 |
| rad12                         | 3.14078e-08 | 1.000000 | 3.14078e-08 | 1.000000 |
| rad11                         | 2.15034e-08 | 1.000000 | 2.15034e-08 | 1.000000 |
| rad6                          | 1.90182e-08 | 1.000000 | 1.90182e-08 | 1.000000 |
| rad22                         | 6.76137e-09 | 1.000000 | 6.76137e-09 | 1.000000 |
| rad26                         | 4.95049e-09 | 1.000000 | 4.95049e-09 | 1.000000 |
| C2H2+PhCH2                    | 2.35316e-09 | 1.000000 | 2.35316e-09 | 1.000000 |
| rad1                          | 2.09382e-09 | 1.000000 | 2.09382e-09 | 1.000000 |
| rad67                         | 1.35773e-09 | 1.000000 | 1.35773e-09 | 1.000000 |
| rad45                         | 1.34410e-09 | 1.000000 | 1.34410e-09 | 1.000000 |
| rad23                         | 1.13396e-09 | 1.000000 | 1.13396e-09 | 1.000000 |
| rad18                         | 8.49854e-10 | 1.000000 | 8.49854e-10 | 1.000000 |
| rad10                         | 6.43559e-10 | 1.000000 | 6.43559e-10 | 1.000000 |
| rad35                         | 6.13406e-10 | 1.000000 | 6.13406e-10 | 1.000000 |
| rad3                          | 1.52351e-10 | 1.000000 | 1.52351e-10 | 1.000000 |
| rad36                         | 8.28764e-11 | 1.000000 | 8.28764e-11 | 1.000000 |
| rad4                          | 7.80829e-11 | 1.000000 | 7.80829e-11 | 1.000000 |
| rad20                         | 4.85970e-11 | 1.000000 | 4.85970e-11 | 1.000000 |
| PhCCCH3+H                     | 4.83416e-11 | 1.000000 | 4.83416e-11 | 1.000000 |
| rad21                         | 3.35230e-11 | 1.000000 | 3.35230e-11 | 1.000000 |
| rad7                          | 3.23276e-11 | 1.000000 | 3.23276e-11 | 1.000000 |
| Ph+MeAc                       | 2.90402e-11 | 1.000000 | 2.90402e-11 | 1.000000 |
| PhCCH+CH3                     | 1.61931e-11 | 1.000000 | 1.61931e-11 | 1.000000 |
| Ph+Allene                     | 9.82257e-12 | 1.000000 | 9.82257e-12 | 1.000000 |
| rad30                         | 9.45529e-12 | 1.000000 | 9.45529e-12 | 1.000000 |
| rad5                          | 5.07508e-12 | 1.000000 | 5.07508e-12 | 1.000000 |
| PhCH2CCH+H                    | 1.53203e-12 | 1.000000 | 1.53203e-12 | 1.000000 |
| rad25                         | 8.99827e-13 | 1.000000 | 8.99827e-13 | 1.000000 |
| PhcycC3H3_A+H                 | 6.25892e-13 | 1.000000 | 6.25892e-13 | 1.000000 |
| rad27                         | 3.84976e-13 | 1.000000 | 3.84976e-13 | 1.000000 |
| rad13                         | 2.62596e-13 | 1.000000 | 2.62596e-13 | 1.000000 |
| rad14                         | 6.29893e-14 | 1.000000 | 6.29893e-14 | 1.000000 |
| rad60syn                      | 3.31708e-14 | 1.000000 | 3.31708e-14 | 1.000000 |
| rad28                         | 2.88801e-14 | 1.000000 | 2.88801e-14 | 1.000000 |
| rad37                         | 2.24402e-14 | 1.000000 | 2.24402e-14 | 1.000000 |
| rad60anti                     | 1.59417e-14 | 1.000000 | 1.59417e-14 | 1.000000 |
| PAH3+H                        | 1.10022e-14 | 1.000000 | 1.10022e-14 | 1.000000 |
| PAH7+H                        | 4.44619e-15 | 1.000000 | 4.44619e-15 | 1.000000 |
| Benzene+cycloprop-2-enylidene | 3.61245e-15 | 1.000000 | 3.61245e-15 | 1.000000 |
| rad59                         | 2.33066e-15 | 1.000000 | 2.33066e-15 | 1.000000 |
| rad38                         | 1.01638e-15 | 1.000000 | 1.01638e-15 | 1.000000 |
| Phenyl+cycC3H4                | 4.45865e-16 | 1.000000 | 0.000000    | 1.000000 |
| rad33                         | 4.15408e-16 | 1.000000 | 4.15408e-16 | 1.000000 |
| PAH9+H                        | 3.58794e-16 | 1.000000 | 3.58794e-16 | 1.000000 |
| rad24                         | 9.12246e-17 | 1.000000 | 9.12246e-17 | 1.000000 |
| rad46                         | 5.45712e-17 | 1.000000 | 5.45712e-17 | 1.000000 |
| PAH10+CH3                     | 1.60154e-17 | 1.000000 | 1.60154e-17 | 1.000000 |
| rad43                         | 2.28314e-18 | 1.000000 | 2.28314e-18 | 1.000000 |
| rad31                         | 6.04145e-19 | 1.000000 | 6.04145e-19 | 1.000000 |
| rad39                         | 2.60273e-19 | 1.000000 | 2.60273e-19 | 1.000000 |
| rad50                         | 2.22662e-19 | 1.000000 | 2.22662e-19 | 1.000000 |
| rad70                         | 1.32018e-19 | 1.000000 | 1.32018e-19 | 1.000000 |
| rad58                         | 8.98571e-20 | 1.000000 | 8.98571e-20 | 1.000000 |
| PhcycC3H3_B+H                 | 4.22135e-20 | 1.000000 | 4.22135e-20 | 1.000000 |
| rad62                         | 4.10507e-20 | 1.000000 | 4.10507e-20 | 1.000000 |
| rad54                         | 3.72898e-21 | 1.000000 | 3.72898e-21 | 1.000000 |
| rad52                         | 1.12014e-21 | 1.000000 | 1.12014e-21 | 1.000000 |
| rad34                         | 1.07325e-21 | 1.000000 | 1.07325e-21 | 1.000000 |
| PAH1+H                        | 5.57931e-22 | 1.000000 | 5.57931e-22 | 1.000000 |
| rad51                         | 2.25662e-22 | 1.000000 | 2.25662e-22 | 1.000000 |
| rad55                         | 2.02358e-23 | 1.000000 | 2.02358e-23 | 1.000000 |
| rad41                         | 1.94226e-23 | 1.000000 | 1.94226e-23 | 1.000000 |
| rad42                         | 1.42793e-24 | 1.000000 | 1.42793e-24 | 1.000000 |
| rad65                         | 4.19861e-25 | 1.000000 | 4.19861e-25 | 1.000000 |
| rad47                         | 1.04696e-25 | 1.000000 | 1.04696e-25 | 1.000000 |
| Benzene+cycloprop-1-enylidene | 1.09842e-27 | 1.000000 | 1.09842e-27 | 1.000000 |
| rad53                         | 1.11117e-30 | 1.000000 | 1.11117e-30 | 1.000000 |
| rad61                         | 2.12699e-33 | 1.000000 | 2.12699e-33 | 1.000000 |
| rad64                         | 1.41349e-34 | 1.000000 | 1.41349e-34 | 1.000000 |
| rad19syn                      | 1.98236e-35 | 1.000000 | 1.98236e-35 | 1.000000 |
| rad68syn                      | 5.46246e-36 | 1.000000 | 5.46246e-36 | 1.000000 |



|           |             |          |             |          |
|-----------|-------------|----------|-------------|----------|
| rad68anti | 4.46478e-36 | 1.000000 | 4.46478e-36 | 1.000000 |
| rad56     | 2.73816e-37 | 1.000000 | 2.73816e-37 | 1.000000 |
| rad8      | 1.65372e-40 | 1.000000 | 1.65372e-40 | 1.000000 |
| rad40syn  | 3.07540e-41 | 1.000000 | 3.07540e-41 | 1.000000 |
| rad40anti | 2.42566e-41 | 1.000000 | 2.42566e-41 | 1.000000 |
| rad73     | 8.69947e-43 | 1.000000 | 8.69947e-43 | 1.000000 |
| PAH8+H    | 5.07307e-44 | 1.000000 | 5.07307e-44 | 1.000000 |
| rad71     | 2.89818e-48 | 1.000000 | 2.89818e-48 | 1.000000 |

10000.0000 Pa, 70.0000000 K

```

=====
Rate constant          | True (fraction)          Effective (fraction)
-----
Total                  | 1.91520e-16 (1.00   ) 1.91520e-16 (1.00   )
Formation of rad19    | 1.91520e-16 (1.000  ) 1.91520e-16 (1.000  )
H-abstraction to cyc2enyl | 1.01125e-28 (5.28e-13) 1.01125e-28 (5.28e-13)
H-abstraction to cyclenyl | 1.97822e-39 (1.03e-23) 1.97822e-39 (1.03e-23)

```

| species                       | PYtrue      | Cumul    | PYeffective | Cumul    |
|-------------------------------|-------------|----------|-------------|----------|
| rad9                          | 0.988426    | 0.988426 | 0.988426    | 0.988426 |
| Indene+H                      | 0.00883576  | 0.997262 | 0.00883576  | 0.997262 |
| rad15                         | 0.00273751  | 0.999999 | 0.00273751  | 0.999999 |
| PhCHCCH2+H                    | 1.03171e-06 | 1.00000  | 1.03171e-06 | 1.00000  |
| rad2                          | 3.90835e-08 | 1.00000  | 3.90835e-08 | 1.00000  |
| rad19anti                     | 3.07341e-08 | 1.00000  | 3.07341e-08 | 1.00000  |
| rad12                         | 2.81987e-08 | 1.00000  | 2.81987e-08 | 1.00000  |
| rad6                          | 2.62071e-08 | 1.00000  | 2.62071e-08 | 1.00000  |
| rad11                         | 2.33993e-08 | 1.00000  | 2.33993e-08 | 1.00000  |
| rad22                         | 7.70381e-09 | 1.00000  | 7.70381e-09 | 1.00000  |
| rad26                         | 6.10387e-09 | 1.00000  | 6.10387e-09 | 1.00000  |
| C2H2+PhCH2                    | 3.09646e-09 | 1.00000  | 3.09646e-09 | 1.00000  |
| rad1                          | 2.56469e-09 | 1.00000  | 2.56469e-09 | 1.00000  |
| rad67                         | 1.73499e-09 | 1.00000  | 1.73499e-09 | 1.00000  |
| rad23                         | 1.66406e-09 | 1.00000  | 1.66406e-09 | 1.00000  |
| rad45                         | 1.64507e-09 | 1.00000  | 1.64507e-09 | 1.00000  |
| rad10                         | 9.34090e-10 | 1.00000  | 9.34090e-10 | 1.00000  |
| rad35                         | 7.82290e-10 | 1.00000  | 7.82290e-10 | 1.00000  |
| rad18                         | 6.60999e-10 | 1.00000  | 6.60999e-10 | 1.00000  |
| rad3                          | 2.15634e-10 | 1.00000  | 2.15634e-10 | 1.00000  |
| rad4                          | 1.10378e-10 | 1.00000  | 1.10378e-10 | 1.00000  |
| rad36                         | 1.01304e-10 | 1.00000  | 1.01304e-10 | 1.00000  |
| PhCCH3+H                      | 7.28356e-11 | 1.00000  | 7.28356e-11 | 1.00000  |
| Ph+MeAc                       | 4.41631e-11 | 1.00000  | 4.41631e-11 | 1.00000  |
| rad20                         | 3.88195e-11 | 1.00000  | 3.88195e-11 | 1.00000  |
| rad7                          | 3.48912e-11 | 1.00000  | 3.48912e-11 | 1.00000  |
| PhCCH+CH3                     | 2.83250e-11 | 1.00000  | 2.83250e-11 | 1.00000  |
| rad21                         | 2.67730e-11 | 1.00000  | 2.67730e-11 | 1.00000  |
| Ph+Allene                     | 1.42122e-11 | 1.00000  | 1.42122e-11 | 1.00000  |
| rad30                         | 1.23147e-11 | 1.00000  | 1.23147e-11 | 1.00000  |
| rad5                          | 6.32954e-12 | 1.00000  | 6.32954e-12 | 1.00000  |
| PhCH2CCH+H                    | 2.24496e-12 | 1.00000  | 2.24496e-12 | 1.00000  |
| rad25                         | 9.40113e-13 | 1.00000  | 9.40113e-13 | 1.00000  |
| PhcycC3H3_A+H                 | 7.62517e-13 | 1.00000  | 7.62517e-13 | 1.00000  |
| Benzene+cycloprop-2-enylidene | 5.28015e-13 | 1.00000  | 5.28015e-13 | 1.00000  |
| rad27                         | 4.40030e-13 | 1.00000  | 4.40030e-13 | 1.00000  |
| rad13                         | 3.32186e-13 | 1.00000  | 3.32186e-13 | 1.00000  |
| rad14                         | 9.23402e-14 | 1.00000  | 9.23402e-14 | 1.00000  |
| rad28                         | 4.85759e-14 | 1.00000  | 4.85759e-14 | 1.00000  |
| rad60syn                      | 4.43226e-14 | 1.00000  | 4.43226e-14 | 1.00000  |
| rad37                         | 3.42733e-14 | 1.00000  | 3.42733e-14 | 1.00000  |
| rad60anti                     | 2.13462e-14 | 1.00000  | 2.13462e-14 | 1.00000  |
| PAH3+H                        | 1.51054e-14 | 1.00000  | 1.51054e-14 | 1.00000  |
| PAH7+H                        | 6.74079e-15 | 1.00000  | 6.74079e-15 | 1.00000  |
| rad59                         | 3.18841e-15 | 1.00000  | 3.18841e-15 | 1.00000  |
| rad38                         | 1.63141e-15 | 1.00000  | 1.63141e-15 | 1.00000  |
| Phenyl+cycC3H4                | 7.87707e-16 | 1.00000  | 0.00000     | 1.00000  |
| PAH9+H                        | 6.76767e-16 | 1.00000  | 6.76767e-16 | 1.00000  |
| rad33                         | 5.11417e-16 | 1.00000  | 5.11417e-16 | 1.00000  |
| rad24                         | 9.10321e-17 | 1.00000  | 9.10321e-17 | 1.00000  |
| rad46                         | 8.88094e-17 | 1.00000  | 8.88094e-17 | 1.00000  |
| PAH10+CH3                     | 2.57280e-17 | 1.00000  | 2.57280e-17 | 1.00000  |
| rad43                         | 3.78832e-18 | 1.00000  | 3.78832e-18 | 1.00000  |
| rad31                         | 7.57189e-19 | 1.00000  | 7.57189e-19 | 1.00000  |
| rad39                         | 5.39118e-19 | 1.00000  | 5.39118e-19 | 1.00000  |
| rad50                         | 3.76756e-19 | 1.00000  | 3.76756e-19 | 1.00000  |
| PhcycC3H3_B+H                 | 3.17645e-19 | 1.00000  | 3.17645e-19 | 1.00000  |
| rad70                         | 2.19540e-19 | 1.00000  | 2.19540e-19 | 1.00000  |
| rad58                         | 1.34638e-19 | 1.00000  | 1.34638e-19 | 1.00000  |
| rad62                         | 8.53121e-20 | 1.00000  | 8.53121e-20 | 1.00000  |

|                               |             |         |             |         |
|-------------------------------|-------------|---------|-------------|---------|
| rad54                         | 6.98810e-21 | 1.00000 | 6.98810e-21 | 1.00000 |
| rad52                         | 1.94614e-21 | 1.00000 | 1.94614e-21 | 1.00000 |
| rad34                         | 1.89511e-21 | 1.00000 | 1.89511e-21 | 1.00000 |
| PAH1+H                        | 9.76488e-22 | 1.00000 | 9.76488e-22 | 1.00000 |
| rad51                         | 4.03919e-22 | 1.00000 | 4.03919e-22 | 1.00000 |
| rad55                         | 3.93470e-23 | 1.00000 | 3.93470e-23 | 1.00000 |
| rad41                         | 3.86447e-23 | 1.00000 | 3.86447e-23 | 1.00000 |
| Benzene+cycloprop-1-enylidene | 1.03290e-23 | 1.00000 | 1.03290e-23 | 1.00000 |
| rad42                         | 3.48803e-24 | 1.00000 | 3.48803e-24 | 1.00000 |
| rad65                         | 8.97492e-25 | 1.00000 | 8.97492e-25 | 1.00000 |
| rad47                         | 1.39479e-25 | 1.00000 | 1.39479e-25 | 1.00000 |
| rad53                         | 3.94784e-30 | 1.00000 | 3.94784e-30 | 1.00000 |
| rad61                         | 9.21829e-33 | 1.00000 | 9.21829e-33 | 1.00000 |
| rad64                         | 6.20086e-34 | 1.00000 | 6.20086e-34 | 1.00000 |
| rad19syn                      | 3.32731e-35 | 1.00000 | 3.32731e-35 | 1.00000 |
| rad68syn                      | 2.53406e-35 | 1.00000 | 2.53406e-35 | 1.00000 |
| rad68anti                     | 2.06890e-35 | 1.00000 | 2.06890e-35 | 1.00000 |
| rad56                         | 1.36900e-36 | 1.00000 | 1.36900e-36 | 1.00000 |
| rad40syn                      | 2.11623e-40 | 1.00000 | 2.11623e-40 | 1.00000 |
| rad40anti                     | 1.67300e-40 | 1.00000 | 1.67300e-40 | 1.00000 |
| rad8                          | 3.07510e-41 | 1.00000 | 3.07510e-41 | 1.00000 |
| rad73                         | 5.42855e-42 | 1.00000 | 5.42855e-42 | 1.00000 |
| PAH8+H                        | 3.91048e-43 | 1.00000 | 3.91048e-43 | 1.00000 |
| rad71                         | 2.28513e-47 | 1.00000 | 2.28513e-47 | 1.00000 |

10000.0000 Pa, 80.0000000 K

| Rate constant             | True (fraction)        | Effective (fraction)   |
|---------------------------|------------------------|------------------------|
| Total                     | 4.17084e-16 (1.00 )    | 4.17084e-16 (1.00 )    |
| Formation of rad19        | 4.17084e-16 (1.000 )   | 4.17084e-16 (1.000 )   |
| H-abstraction to cyc2enyl | 8.98751e-27 (2.15e-11) | 8.98751e-27 (2.15e-11) |
| H-abstraction to cyclenyl | 4.00120e-36 (9.59e-21) | 4.00120e-36 (9.59e-21) |

| species                       | PYtrue      | Cumul    | PYeffective | Cumul    |
|-------------------------------|-------------|----------|-------------|----------|
| rad9                          | 0.986963    | 0.986963 | 0.986963    | 0.986963 |
| Indene+H                      | 0.0103751   | 0.997338 | 0.0103751   | 0.997338 |
| rad15                         | 0.00266090  | 0.999999 | 0.00266090  | 0.999999 |
| PhCHCCH2+H                    | 1.23653e-06 | 1.00000  | 1.23653e-06 | 1.00000  |
| rad2                          | 4.67491e-08 | 1.00000  | 4.67491e-08 | 1.00000  |
| rad6                          | 3.43478e-08 | 1.00000  | 3.43478e-08 | 1.00000  |
| rad19anti                     | 2.77473e-08 | 1.00000  | 2.77473e-08 | 1.00000  |
| rad12                         | 2.58664e-08 | 1.00000  | 2.58664e-08 | 1.00000  |
| rad11                         | 2.48603e-08 | 1.00000  | 2.48603e-08 | 1.00000  |
| rad22                         | 8.48804e-09 | 1.00000  | 8.48804e-09 | 1.00000  |
| rad26                         | 7.33116e-09 | 1.00000  | 7.33116e-09 | 1.00000  |
| C2H2+PhCH2                    | 3.91180e-09 | 1.00000  | 3.91180e-09 | 1.00000  |
| rad1                          | 3.06495e-09 | 1.00000  | 3.06495e-09 | 1.00000  |
| rad23                         | 2.28586e-09 | 1.00000  | 2.28586e-09 | 1.00000  |
| rad67                         | 2.14467e-09 | 1.00000  | 2.14467e-09 | 1.00000  |
| rad45                         | 1.94703e-09 | 1.00000  | 1.94703e-09 | 1.00000  |
| rad10                         | 1.28684e-09 | 1.00000  | 1.28684e-09 | 1.00000  |
| rad35                         | 9.65145e-10 | 1.00000  | 9.65145e-10 | 1.00000  |
| rad18                         | 5.32542e-10 | 1.00000  | 5.32542e-10 | 1.00000  |
| rad3                          | 2.89689e-10 | 1.00000  | 2.89689e-10 | 1.00000  |
| rad4                          | 1.48178e-10 | 1.00000  | 1.48178e-10 | 1.00000  |
| rad36                         | 1.19793e-10 | 1.00000  | 1.19793e-10 | 1.00000  |
| PhCCCH3+H                     | 1.04297e-10 | 1.00000  | 1.04297e-10 | 1.00000  |
| Ph+MeAc                       | 6.38611e-11 | 1.00000  | 6.38611e-11 | 1.00000  |
| PhCCH+CH3                     | 4.59415e-11 | 1.00000  | 4.59415e-11 | 1.00000  |
| rad7                          | 3.95891e-11 | 1.00000  | 3.95891e-11 | 1.00000  |
| rad20                         | 3.22615e-11 | 1.00000  | 3.22615e-11 | 1.00000  |
| rad21                         | 2.22447e-11 | 1.00000  | 2.22447e-11 | 1.00000  |
| Benzene+cycloprop-2-enylidene | 2.15484e-11 | 1.00000  | 2.15484e-11 | 1.00000  |
| Ph+Allene                     | 1.95669e-11 | 1.00000  | 1.95669e-11 | 1.00000  |
| rad30                         | 1.54240e-11 | 1.00000  | 1.54240e-11 | 1.00000  |
| rad5                          | 7.70767e-12 | 1.00000  | 7.70767e-12 | 1.00000  |
| PhCH2CCH+H                    | 3.13175e-12 | 1.00000  | 3.13175e-12 | 1.00000  |
| rad25                         | 9.62791e-13 | 1.00000  | 9.62791e-13 | 1.00000  |
| PhcycC3H3_A+H                 | 9.33426e-13 | 1.00000  | 9.33426e-13 | 1.00000  |
| rad27                         | 4.95354e-13 | 1.00000  | 4.95354e-13 | 1.00000  |
| rad13                         | 4.05673e-13 | 1.00000  | 4.05673e-13 | 1.00000  |
| rad14                         | 1.26797e-13 | 1.00000  | 1.26797e-13 | 1.00000  |
| rad28                         | 7.63257e-14 | 1.00000  | 7.63257e-14 | 1.00000  |
| rad60syn                      | 5.68299e-14 | 1.00000  | 5.68299e-14 | 1.00000  |
| rad37                         | 4.97707e-14 | 1.00000  | 4.97707e-14 | 1.00000  |
| rad60anti                     | 2.74236e-14 | 1.00000  | 2.74236e-14 | 1.00000  |
| PAH3+H                        | 1.98731e-14 | 1.00000  | 1.98731e-14 | 1.00000  |
| PAH7+H                        | 9.64187e-15 | 1.00000  | 9.64187e-15 | 1.00000  |

|                               |             |         |             |         |
|-------------------------------|-------------|---------|-------------|---------|
| rad59                         | 4.18017e-15 | 1.00000 | 4.18017e-15 | 1.00000 |
| rad38                         | 2.44510e-15 | 1.00000 | 2.44510e-15 | 1.00000 |
| Phenyl+cycC3H4                | 1.32414e-15 | 1.00000 | 0.00000     | 1.00000 |
| PAH9+H                        | 1.15911e-15 | 1.00000 | 1.15911e-15 | 1.00000 |
| rad33                         | 6.11324e-16 | 1.00000 | 6.11324e-16 | 1.00000 |
| rad46                         | 1.34777e-16 | 1.00000 | 1.34777e-16 | 1.00000 |
| rad24                         | 9.47964e-17 | 1.00000 | 9.47964e-17 | 1.00000 |
| PAH10+CH3                     | 3.94475e-17 | 1.00000 | 3.94475e-17 | 1.00000 |
| rad43                         | 5.94369e-18 | 1.00000 | 5.94369e-18 | 1.00000 |
| PhcycC3H3_B+H                 | 2.12907e-18 | 1.00000 | 2.12907e-18 | 1.00000 |
| rad39                         | 1.02338e-18 | 1.00000 | 1.02338e-18 | 1.00000 |
| rad31                         | 9.27804e-19 | 1.00000 | 9.27804e-19 | 1.00000 |
| rad50                         | 5.94432e-19 | 1.00000 | 5.94432e-19 | 1.00000 |
| rad70                         | 3.44669e-19 | 1.00000 | 3.44669e-19 | 1.00000 |
| rad58                         | 1.93193e-19 | 1.00000 | 1.93193e-19 | 1.00000 |
| rad62                         | 1.62048e-19 | 1.00000 | 1.62048e-19 | 1.00000 |
| rad54                         | 1.21872e-20 | 1.00000 | 1.21872e-20 | 1.00000 |
| Benzene+cycloprop-1-enylidene | 9.59328e-21 | 1.00000 | 9.59328e-21 | 1.00000 |
| rad34                         | 3.16577e-21 | 1.00000 | 3.16577e-21 | 1.00000 |
| rad52                         | 3.15483e-21 | 1.00000 | 3.15483e-21 | 1.00000 |
| PAH1+H                        | 1.64140e-21 | 1.00000 | 1.64140e-21 | 1.00000 |
| rad51                         | 6.75413e-22 | 1.00000 | 6.75413e-22 | 1.00000 |
| rad41                         | 7.31493e-23 | 1.00000 | 7.31493e-23 | 1.00000 |
| rad55                         | 7.13788e-23 | 1.00000 | 7.13788e-23 | 1.00000 |
| rad42                         | 7.85163e-24 | 1.00000 | 7.85163e-24 | 1.00000 |
| rad65                         | 1.74953e-24 | 1.00000 | 1.74953e-24 | 1.00000 |
| rad47                         | 1.77943e-25 | 1.00000 | 1.77943e-25 | 1.00000 |
| rad53                         | 1.40382e-29 | 1.00000 | 1.40382e-29 | 1.00000 |
| rad61                         | 4.58940e-32 | 1.00000 | 4.58940e-32 | 1.00000 |
| rad64                         | 2.76940e-33 | 1.00000 | 2.76940e-33 | 1.00000 |
| rad68syn                      | 1.38762e-34 | 1.00000 | 1.38762e-34 | 1.00000 |
| rad68anti                     | 1.13145e-34 | 1.00000 | 1.13145e-34 | 1.00000 |
| rad19syn                      | 5.95243e-35 | 1.00000 | 5.95243e-35 | 1.00000 |
| rad56                         | 7.76149e-36 | 1.00000 | 7.76149e-36 | 1.00000 |
| rad40syn                      | 1.73039e-39 | 1.00000 | 1.73039e-39 | 1.00000 |
| rad40anti                     | 1.37093e-39 | 1.00000 | 1.37093e-39 | 1.00000 |
| rad73                         | 4.00345e-41 | 1.00000 | 4.00345e-41 | 1.00000 |
| rad8                          | 8.81873e-42 | 1.00000 | 8.81873e-42 | 1.00000 |
| PAH8+H                        | 3.65615e-42 | 1.00000 | 3.65615e-42 | 1.00000 |
| rad71                         | 2.18917e-46 | 1.00000 | 2.18917e-46 | 1.00000 |

10000.0000 Pa, 90.0000000 K

| Rate constant             | True (fraction)        | Effective (fraction)   |
|---------------------------|------------------------|------------------------|
| Total                     | 7.74016e-16 (1.00 )    | 7.74016e-16 (1.00 )    |
| Formation of rad19        | 7.74016e-16 (1.000 )   | 7.74016e-16 (1.000 )   |
| H-abstraction to cyc2enyl | 2.91736e-25 (3.77e-10) | 2.91736e-25 (3.77e-10) |
| H-abstraction to cyclenyl | 1.47814e-33 (1.91e-18) | 1.47814e-33 (1.91e-18) |

| species                       | PYtrue      | Cumul    | PYeffective | Cumul    |
|-------------------------------|-------------|----------|-------------|----------|
| rad9                          | 0.985472    | 0.985472 | 0.985472    | 0.985472 |
| Indene+H                      | 0.0119296   | 0.997402 | 0.0119296   | 0.997402 |
| rad15                         | 0.00259674  | 0.999998 | 0.00259674  | 0.999998 |
| PhCHCCH2+H                    | 1.45528e-06 | 1.000000 | 1.45528e-06 | 1.000000 |
| rad2                          | 5.49117e-08 | 1.000000 | 5.49117e-08 | 1.000000 |
| rad6                          | 4.34681e-08 | 1.000000 | 4.34681e-08 | 1.000000 |
| rad11                         | 2.59765e-08 | 1.000000 | 2.59765e-08 | 1.000000 |
| rad19anti                     | 2.54804e-08 | 1.000000 | 2.54804e-08 | 1.000000 |
| rad12                         | 2.40878e-08 | 1.000000 | 2.40878e-08 | 1.000000 |
| rad22                         | 9.14178e-09 | 1.000000 | 9.14178e-09 | 1.000000 |
| rad26                         | 8.64647e-09 | 1.000000 | 8.64647e-09 | 1.000000 |
| C2H2+PhCH2                    | 4.80886e-09 | 1.000000 | 4.80886e-09 | 1.000000 |
| rad1                          | 3.60073e-09 | 1.000000 | 3.60073e-09 | 1.000000 |
| rad23                         | 3.00060e-09 | 1.000000 | 3.00060e-09 | 1.000000 |
| rad67                         | 2.59216e-09 | 1.000000 | 2.59216e-09 | 1.000000 |
| rad45                         | 2.25378e-09 | 1.000000 | 2.25378e-09 | 1.000000 |
| rad10                         | 1.70893e-09 | 1.000000 | 1.70893e-09 | 1.000000 |
| rad35                         | 1.16429e-09 | 1.000000 | 1.16429e-09 | 1.000000 |
| rad18                         | 4.41237e-10 | 1.000000 | 4.41237e-10 | 1.000000 |
| Benzene+cycloprop-2-enylidene | 3.76912e-10 | 1.000000 | 3.76912e-10 | 1.000000 |
| rad3                          | 3.75112e-10 | 1.000000 | 3.75112e-10 | 1.000000 |
| rad4                          | 1.91807e-10 | 1.000000 | 1.91807e-10 | 1.000000 |
| PhCCCH3+H                     | 1.44193e-10 | 1.000000 | 1.44193e-10 | 1.000000 |
| rad36                         | 1.38587e-10 | 1.000000 | 1.38587e-10 | 1.000000 |
| Ph+MeAc                       | 8.92048e-11 | 1.000000 | 8.92048e-11 | 1.000000 |
| PhCCH+CH3                     | 7.06792e-11 | 1.000000 | 7.06792e-11 | 1.000000 |
| rad7                          | 4.62326e-11 | 1.000000 | 4.62326e-11 | 1.000000 |
| rad20                         | 2.76105e-11 | 1.000000 | 2.76105e-11 | 1.000000 |

|                               |             |         |             |         |
|-------------------------------|-------------|---------|-------------|---------|
| Ph+Allene                     | 2.60318e-11 | 1.00000 | 2.60318e-11 | 1.00000 |
| rad21                         | 1.90310e-11 | 1.00000 | 1.90310e-11 | 1.00000 |
| rad30                         | 1.88207e-11 | 1.00000 | 1.88207e-11 | 1.00000 |
| rad5                          | 9.23242e-12 | 1.00000 | 9.23242e-12 | 1.00000 |
| PhCH2CCH+H                    | 4.22406e-12 | 1.00000 | 4.22406e-12 | 1.00000 |
| PhcycC3H3_A+H                 | 1.14840e-12 | 1.00000 | 1.14840e-12 | 1.00000 |
| rad25                         | 9.73487e-13 | 1.00000 | 9.73487e-13 | 1.00000 |
| rad27                         | 5.52245e-13 | 1.00000 | 5.52245e-13 | 1.00000 |
| rad13                         | 4.83534e-13 | 1.00000 | 4.83534e-13 | 1.00000 |
| rad14                         | 1.66435e-13 | 1.00000 | 1.66435e-13 | 1.00000 |
| rad28                         | 1.14327e-13 | 1.00000 | 1.14327e-13 | 1.00000 |
| rad60syn                      | 7.09058e-14 | 1.00000 | 7.09058e-14 | 1.00000 |
| rad37                         | 6.98223e-14 | 1.00000 | 6.98223e-14 | 1.00000 |
| rad60anti                     | 3.42809e-14 | 1.00000 | 3.42809e-14 | 1.00000 |
| PAH3+H                        | 2.54272e-14 | 1.00000 | 2.54272e-14 | 1.00000 |
| PAH7+H                        | 1.32583e-14 | 1.00000 | 1.32583e-14 | 1.00000 |
| rad59                         | 5.32989e-15 | 1.00000 | 5.32989e-15 | 1.00000 |
| rad38                         | 3.49785e-15 | 1.00000 | 3.49785e-15 | 1.00000 |
| Phenyl+cycC3H4                | 2.14260e-15 | 1.00000 | 0.00000     | 1.00000 |
| PAH9+H                        | 1.85777e-15 | 1.00000 | 1.85777e-15 | 1.00000 |
| rad33                         | 7.16054e-16 | 1.00000 | 7.16054e-16 | 1.00000 |
| rad46                         | 1.95081e-16 | 1.00000 | 1.95081e-16 | 1.00000 |
| rad24                         | 1.00287e-16 | 1.00000 | 1.00287e-16 | 1.00000 |
| PAH10+CH3                     | 5.86676e-17 | 1.00000 | 5.86676e-17 | 1.00000 |
| PhcycC3H3_B+H                 | 1.05684e-17 | 1.00000 | 1.05684e-17 | 1.00000 |
| rad43                         | 8.98987e-18 | 1.00000 | 8.98987e-18 | 1.00000 |
| Benzene+cycloprop-1-enylidene | 1.90970e-18 | 1.00000 | 1.90970e-18 | 1.00000 |
| rad39                         | 1.82918e-18 | 1.00000 | 1.82918e-18 | 1.00000 |
| rad31                         | 1.11960e-18 | 1.00000 | 1.11960e-18 | 1.00000 |
| rad50                         | 8.95008e-19 | 1.00000 | 8.95008e-19 | 1.00000 |
| rad70                         | 5.21127e-19 | 1.00000 | 5.21127e-19 | 1.00000 |
| rad62                         | 2.89687e-19 | 1.00000 | 2.89687e-19 | 1.00000 |
| rad58                         | 2.69837e-19 | 1.00000 | 2.69837e-19 | 1.00000 |
| rad54                         | 2.02573e-20 | 1.00000 | 2.02573e-20 | 1.00000 |
| rad34                         | 5.10435e-21 | 1.00000 | 5.10435e-21 | 1.00000 |
| rad52                         | 4.88497e-21 | 1.00000 | 4.88497e-21 | 1.00000 |
| PAH1+H                        | 2.69332e-21 | 1.00000 | 2.69332e-21 | 1.00000 |
| rad51                         | 1.08034e-21 | 1.00000 | 1.08034e-21 | 1.00000 |
| rad41                         | 1.34272e-22 | 1.00000 | 1.34272e-22 | 1.00000 |
| rad55                         | 1.23739e-22 | 1.00000 | 1.23739e-22 | 1.00000 |
| rad42                         | 1.67543e-23 | 1.00000 | 1.67543e-23 | 1.00000 |
| rad65                         | 3.20930e-24 | 1.00000 | 3.20930e-24 | 1.00000 |
| rad47                         | 2.20684e-25 | 1.00000 | 2.20684e-25 | 1.00000 |
| rad53                         | 4.94997e-29 | 1.00000 | 4.94997e-29 | 1.00000 |
| rad61                         | 2.76760e-31 | 1.00000 | 2.76760e-31 | 1.00000 |
| rad64                         | 1.27125e-32 | 1.00000 | 1.27125e-32 | 1.00000 |
| rad68syn                      | 9.73076e-34 | 1.00000 | 9.73076e-34 | 1.00000 |
| rad68anti                     | 7.92136e-34 | 1.00000 | 7.92136e-34 | 1.00000 |
| rad19syn                      | 1.11926e-34 | 1.00000 | 1.11926e-34 | 1.00000 |
| rad56                         | 5.35202e-35 | 1.00000 | 5.35202e-35 | 1.00000 |
| rad40syn                      | 1.79589e-38 | 1.00000 | 1.79589e-38 | 1.00000 |
| rad40anti                     | 1.42567e-38 | 1.00000 | 1.42567e-38 | 1.00000 |
| rad73                         | 3.76249e-40 | 1.00000 | 3.76249e-40 | 1.00000 |
| PAH8+H                        | 4.44999e-41 | 1.00000 | 4.44999e-41 | 1.00000 |
| rad8                          | 3.43172e-42 | 1.00000 | 3.43172e-42 | 1.00000 |
| rad71                         | 2.77232e-45 | 1.00000 | 2.77232e-45 | 1.00000 |

10000.0000 Pa, 100.000000 K

| Rate constant             | True (fraction)        | Effective (fraction)   |
|---------------------------|------------------------|------------------------|
| Total                     | 1.28255e-15 (1.00 )    | 1.28255e-15 (1.00 )    |
| Formation of rad19        | 1.28255e-15 (1.000 )   | 1.28255e-15 (1.000 )   |
| H-abstraction to cyc2enyl | 4.68359e-24 (3.65e-09) | 4.68359e-24 (3.65e-09) |
| H-abstraction to cyc1enyl | 1.66242e-31 (1.30e-16) | 1.66242e-31 (1.30e-16) |

| species    | PYtrue      | Cumul    | PYeffective | Cumul    |
|------------|-------------|----------|-------------|----------|
| rad9       | 0.983949    | 0.983949 | 0.983949    | 0.983949 |
| Indene+H   | 0.0135071   | 0.997456 | 0.0135071   | 0.997456 |
| rad15      | 0.00254170  | 0.999998 | 0.00254170  | 0.999998 |
| PhCHCCH2+H | 1.69044e-06 | 0.999999 | 1.69044e-06 | 0.999999 |
| rad2       | 6.36623e-08 | 1.000000 | 6.36623e-08 | 1.000000 |
| rad6       | 5.36289e-08 | 1.000000 | 5.36289e-08 | 1.000000 |
| rad11      | 2.68152e-08 | 1.000000 | 2.68152e-08 | 1.000000 |
| rad19anti  | 2.36974e-08 | 1.000000 | 2.36974e-08 | 1.000000 |
| rad12      | 2.26832e-08 | 1.000000 | 2.26832e-08 | 1.000000 |
| rad26      | 1.00655e-08 | 1.000000 | 1.00655e-08 | 1.000000 |
| rad22      | 9.68634e-09 | 1.000000 | 9.68634e-09 | 1.000000 |
| C2H2+PhCH2 | 5.80004e-09 | 1.000000 | 5.80004e-09 | 1.000000 |

|                               |             |          |             |          |
|-------------------------------|-------------|----------|-------------|----------|
| rad1                          | 4.17875e-09 | 1.000000 | 4.17875e-09 | 1.000000 |
| rad23                         | 3.81220e-09 | 1.000000 | 3.81220e-09 | 1.000000 |
| Benzene+cycloprop-2-enylidene | 3.65179e-09 | 1.000000 | 3.65179e-09 | 1.000000 |
| rad67                         | 3.08395e-09 | 1.000000 | 3.08395e-09 | 1.000000 |
| rad45                         | 2.56902e-09 | 1.000000 | 2.56902e-09 | 1.000000 |
| rad10                         | 2.20946e-09 | 1.000000 | 2.20946e-09 | 1.000000 |
| rad35                         | 1.38249e-09 | 1.000000 | 1.38249e-09 | 1.000000 |
| rad3                          | 4.72758e-10 | 1.000000 | 4.72758e-10 | 1.000000 |
| rad18                         | 3.73830e-10 | 1.000000 | 3.73830e-10 | 1.000000 |
| rad4                          | 2.41724e-10 | 1.000000 | 2.41724e-10 | 1.000000 |
| PhCCCH3+H                     | 1.94434e-10 | 1.000000 | 1.94434e-10 | 1.000000 |
| rad36                         | 1.57925e-10 | 1.000000 | 1.57925e-10 | 1.000000 |
| Ph+MeAc                       | 1.21605e-10 | 1.000000 | 1.21605e-10 | 1.000000 |
| PhCCH+CH3                     | 1.04654e-10 | 1.000000 | 1.04654e-10 | 1.000000 |
| rad7                          | 5.47227e-11 | 1.000000 | 5.47227e-11 | 1.000000 |
| Ph+Allene                     | 3.37985e-11 | 1.000000 | 3.37985e-11 | 1.000000 |
| rad20                         | 2.41503e-11 | 1.000000 | 2.41503e-11 | 1.000000 |
| rad30                         | 2.25518e-11 | 1.000000 | 2.25518e-11 | 1.000000 |
| rad21                         | 1.66380e-11 | 1.000000 | 1.66380e-11 | 1.000000 |
| rad5                          | 1.09300e-11 | 1.000000 | 1.09300e-11 | 1.000000 |
| PhCH2CCH+H                    | 5.56357e-12 | 1.000000 | 5.56357e-12 | 1.000000 |
| PhcycC3H3_A+H                 | 1.42038e-12 | 1.000000 | 1.42038e-12 | 1.000000 |
| rad25                         | 9.75767e-13 | 1.000000 | 9.75767e-13 | 1.000000 |
| rad27                         | 6.11727e-13 | 1.000000 | 6.11727e-13 | 1.000000 |
| rad13                         | 5.66423e-13 | 1.000000 | 5.66423e-13 | 1.000000 |
| rad14                         | 2.11484e-13 | 1.000000 | 2.11484e-13 | 1.000000 |
| rad28                         | 1.65415e-13 | 1.000000 | 1.65415e-13 | 1.000000 |
| rad37                         | 9.56083e-14 | 1.000000 | 9.56083e-14 | 1.000000 |
| rad60syn                      | 8.68281e-14 | 1.000000 | 8.68281e-14 | 1.000000 |
| rad60anti                     | 4.20574e-14 | 1.000000 | 4.20574e-14 | 1.000000 |
| PAH3+H                        | 3.19298e-14 | 1.000000 | 3.19298e-14 | 1.000000 |
| PAH7+H                        | 1.77344e-14 | 1.000000 | 1.77344e-14 | 1.000000 |
| rad59                         | 6.66929e-15 | 1.000000 | 6.66929e-15 | 1.000000 |
| rad38                         | 4.84257e-15 | 1.000000 | 4.84257e-15 | 1.000000 |
| Phenyl+cycC3H4                | 3.36872e-15 | 1.000000 | 0.000000    | 1.000000 |
| PAH9+H                        | 2.83970e-15 | 1.000000 | 2.83970e-15 | 1.000000 |
| rad33                         | 8.26689e-16 | 1.000000 | 8.26689e-16 | 1.000000 |
| rad46                         | 2.73156e-16 | 1.000000 | 2.73156e-16 | 1.000000 |
| Benzene+cycloprop-1-enylidene | 1.29619e-16 | 1.000000 | 1.29619e-16 | 1.000000 |
| rad24                         | 1.06733e-16 | 1.000000 | 1.06733e-16 | 1.000000 |
| PAH10+CH3                     | 8.55426e-17 | 1.000000 | 8.55426e-17 | 1.000000 |
| PhcycC3H3_B+H                 | 4.05259e-17 | 1.000000 | 4.05259e-17 | 1.000000 |
| rad43                         | 1.32722e-17 | 1.000000 | 1.32722e-17 | 1.000000 |
| rad39                         | 3.13404e-18 | 1.000000 | 3.13404e-18 | 1.000000 |
| rad31                         | 1.33693e-18 | 1.000000 | 1.33693e-18 | 1.000000 |
| rad50                         | 1.30504e-18 | 1.000000 | 1.30504e-18 | 1.000000 |
| rad70                         | 7.68554e-19 | 1.000000 | 7.68554e-19 | 1.000000 |
| rad62                         | 4.96628e-19 | 1.000000 | 4.96628e-19 | 1.000000 |
| rad58                         | 3.70638e-19 | 1.000000 | 3.70638e-19 | 1.000000 |
| rad54                         | 3.25953e-20 | 1.000000 | 3.25953e-20 | 1.000000 |
| rad34                         | 8.04699e-21 | 1.000000 | 8.04699e-21 | 1.000000 |
| rad52                         | 7.33417e-21 | 1.000000 | 7.33417e-21 | 1.000000 |
| PAH1+H                        | 4.36179e-21 | 1.000000 | 4.36179e-21 | 1.000000 |
| rad51                         | 1.67845e-21 | 1.000000 | 1.67845e-21 | 1.000000 |
| rad41                         | 2.42053e-22 | 1.000000 | 2.42053e-22 | 1.000000 |
| rad55                         | 2.08250e-22 | 1.000000 | 2.08250e-22 | 1.000000 |
| rad42                         | 3.45169e-23 | 1.000000 | 3.45169e-23 | 1.000000 |
| rad65                         | 5.65334e-24 | 1.000000 | 5.65334e-24 | 1.000000 |
| rad47                         | 2.68537e-25 | 1.000000 | 2.68537e-25 | 1.000000 |
| rad53                         | 1.69692e-28 | 1.000000 | 1.69692e-28 | 1.000000 |
| rad61                         | 1.99183e-30 | 1.000000 | 1.99183e-30 | 1.000000 |
| rad64                         | 5.89698e-32 | 1.000000 | 5.89698e-32 | 1.000000 |
| rad68syn                      | 9.13376e-33 | 1.000000 | 9.13376e-33 | 1.000000 |
| rad68anti                     | 7.41553e-33 | 1.000000 | 7.41553e-33 | 1.000000 |
| rad56                         | 4.58918e-34 | 1.000000 | 4.58918e-34 | 1.000000 |
| rad19syn                      | 2.20102e-34 | 1.000000 | 2.20102e-34 | 1.000000 |
| rad40syn                      | 2.54332e-37 | 1.000000 | 2.54332e-37 | 1.000000 |
| rad40anti                     | 2.02211e-37 | 1.000000 | 2.02211e-37 | 1.000000 |
| rad73                         | 4.84320e-39 | 1.000000 | 4.84320e-39 | 1.000000 |
| PAH8+H                        | 7.71889e-40 | 1.000000 | 7.71889e-40 | 1.000000 |
| rad8                          | 1.67231e-42 | 1.000000 | 1.67231e-42 | 1.000000 |
| rad71                         | 5.19718e-44 | 1.000000 | 5.19718e-44 | 1.000000 |

10000.0000 Pa, 110.000000 K

| Rate constant             | True (fraction)        | Effective (fraction)   |
|---------------------------|------------------------|------------------------|
| Total                     | 1.95524e-15 (1.00)     | 1.95524e-15 (1.00)     |
| Formation of rad19        | 1.95524e-15 (1.000)    | 1.95524e-15 (1.000)    |
| H-abstraction to cyc2enyl | 4.50936e-23 (2.31e-08) | 4.50936e-23 (2.31e-08) |

H-abstraction to cyclenyl | 7.87782e-30 (4.03e-15) 7.87782e-30 (4.03e-15)

| species                       | PYtrue      | Cumul    | PYeffective | Cumul    |
|-------------------------------|-------------|----------|-------------|----------|
| rad9                          | 0.982389    | 0.982389 | 0.982389    | 0.982389 |
| Indene+H                      | 0.0151155   | 0.997504 | 0.0151155   | 0.997504 |
| rad15                         | 0.00249357  | 0.999998 | 0.00249357  | 0.999998 |
| PhCHCCH2+H                    | 1.94487e-06 | 1.000000 | 1.94487e-06 | 1.000000 |
| rad2                          | 7.31039e-08 | 1.000000 | 7.31039e-08 | 1.000000 |
| rad6                          | 6.49236e-08 | 1.000000 | 6.49236e-08 | 1.000000 |
| rad11                         | 2.74280e-08 | 1.000000 | 2.74280e-08 | 1.000000 |
| Benzene+cycloprop-2-enylidene | 2.30629e-08 | 1.000000 | 2.30629e-08 | 1.000000 |
| rad19anti                     | 2.22583e-08 | 1.000000 | 2.22583e-08 | 1.000000 |
| rad12                         | 2.15443e-08 | 1.000000 | 2.15443e-08 | 1.000000 |
| rad26                         | 1.16065e-08 | 1.000000 | 1.16065e-08 | 1.000000 |
| rad22                         | 1.01384e-08 | 1.000000 | 1.01384e-08 | 1.000000 |
| C2H2+PhCH2                    | 6.90066e-09 | 1.000000 | 6.90066e-09 | 1.000000 |
| rad1                          | 4.80669e-09 | 1.000000 | 4.80669e-09 | 1.000000 |
| rad23                         | 4.72717e-09 | 1.000000 | 4.72717e-09 | 1.000000 |
| rad67                         | 3.62784e-09 | 1.000000 | 3.62784e-09 | 1.000000 |
| rad45                         | 2.89654e-09 | 1.000000 | 2.89654e-09 | 1.000000 |
| rad10                         | 2.79982e-09 | 1.000000 | 2.79982e-09 | 1.000000 |
| rad35                         | 1.62308e-09 | 1.000000 | 1.62308e-09 | 1.000000 |
| rad3                          | 5.83757e-10 | 1.000000 | 5.83757e-10 | 1.000000 |
| rad18                         | 3.22451e-10 | 1.000000 | 3.22451e-10 | 1.000000 |
| rad4                          | 2.98534e-10 | 1.000000 | 2.98534e-10 | 1.000000 |
| PhCCCH3+H                     | 2.57520e-10 | 1.000000 | 2.57520e-10 | 1.000000 |
| rad36                         | 1.78053e-10 | 1.000000 | 1.78053e-10 | 1.000000 |
| Ph+MeAc                       | 1.62933e-10 | 1.000000 | 1.62933e-10 | 1.000000 |
| PhCCH+CH3                     | 1.50638e-10 | 1.000000 | 1.50638e-10 | 1.000000 |
| rad7                          | 6.50332e-11 | 1.000000 | 6.50332e-11 | 1.000000 |
| Ph+Allene                     | 4.31164e-11 | 1.000000 | 4.31164e-11 | 1.000000 |
| rad30                         | 2.66749e-11 | 1.000000 | 2.66749e-11 | 1.000000 |
| rad20                         | 2.14722e-11 | 1.000000 | 2.14722e-11 | 1.000000 |
| rad21                         | 1.47842e-11 | 1.000000 | 1.47842e-11 | 1.000000 |
| rad5                          | 1.28310e-11 | 1.000000 | 1.28310e-11 | 1.000000 |
| PhCH2CCH+H                    | 7.20498e-12 | 1.000000 | 7.20498e-12 | 1.000000 |
| PhcycC3H3_A+H                 | 1.76675e-12 | 1.000000 | 1.76675e-12 | 1.000000 |
| rad25                         | 9.71996e-13 | 1.000000 | 9.71996e-13 | 1.000000 |
| rad27                         | 6.74733e-13 | 1.000000 | 6.74733e-13 | 1.000000 |
| rad13                         | 6.55169e-13 | 1.000000 | 6.55169e-13 | 1.000000 |
| rad14                         | 2.62320e-13 | 1.000000 | 2.62320e-13 | 1.000000 |
| rad28                         | 2.33307e-13 | 1.000000 | 2.33307e-13 | 1.000000 |
| rad37                         | 1.28707e-13 | 1.000000 | 1.28707e-13 | 1.000000 |
| rad60syn                      | 1.04950e-13 | 1.000000 | 1.04950e-13 | 1.000000 |
| rad60anti                     | 5.09307e-14 | 1.000000 | 5.09307e-14 | 1.000000 |
| PAH3+H                        | 3.95917e-14 | 1.000000 | 3.95917e-14 | 1.000000 |
| PAH7+H                        | 2.32610e-14 | 1.000000 | 2.32610e-14 | 1.000000 |
| rad59                         | 8.23956e-15 | 1.000000 | 8.23956e-15 | 1.000000 |
| rad38                         | 6.54899e-15 | 1.000000 | 6.54899e-15 | 1.000000 |
| Phenyl+cycC3H4                | 5.18583e-15 | 1.000000 | 0.000000    | 1.000000 |
| PAH9+H                        | 4.19301e-15 | 1.000000 | 4.19301e-15 | 1.000000 |
| Benzene+cycloprop-1-enylidene | 4.02908e-15 | 1.000000 | 4.02908e-15 | 1.000000 |
| rad33                         | 9.44484e-16 | 1.000000 | 9.44484e-16 | 1.000000 |
| rad46                         | 3.73559e-16 | 1.000000 | 3.73559e-16 | 1.000000 |
| PhcycC3H3_B+H                 | 1.27772e-16 | 1.000000 | 1.27772e-16 | 1.000000 |
| PAH10+CH3                     | 1.23226e-16 | 1.000000 | 1.23226e-16 | 1.000000 |
| rad24                         | 1.13876e-16 | 1.000000 | 1.13876e-16 | 1.000000 |
| rad43                         | 1.92933e-17 | 1.000000 | 1.92933e-17 | 1.000000 |
| rad39                         | 5.21295e-18 | 1.000000 | 5.21295e-18 | 1.000000 |
| rad50                         | 1.86152e-18 | 1.000000 | 1.86152e-18 | 1.000000 |
| rad31                         | 1.58509e-18 | 1.000000 | 1.58509e-18 | 1.000000 |
| rad70                         | 1.11541e-18 | 1.000000 | 1.11541e-18 | 1.000000 |
| rad62                         | 8.27155e-19 | 1.000000 | 8.27155e-19 | 1.000000 |
| rad58                         | 5.04193e-19 | 1.000000 | 5.04193e-19 | 1.000000 |
| rad54                         | 5.13343e-20 | 1.000000 | 5.13343e-20 | 1.000000 |
| rad34                         | 1.25165e-20 | 1.000000 | 1.25165e-20 | 1.000000 |
| rad52                         | 1.07884e-20 | 1.000000 | 1.07884e-20 | 1.000000 |
| PAH1+H                        | 7.02854e-21 | 1.000000 | 7.02854e-21 | 1.000000 |
| rad51                         | 2.56013e-21 | 1.000000 | 2.56013e-21 | 1.000000 |
| rad41                         | 4.32435e-22 | 1.000000 | 4.32435e-22 | 1.000000 |
| rad55                         | 3.44109e-22 | 1.000000 | 3.44109e-22 | 1.000000 |
| rad42                         | 6.95293e-23 | 1.000000 | 6.95293e-23 | 1.000000 |
| rad65                         | 9.69995e-24 | 1.000000 | 9.69995e-24 | 1.000000 |
| rad47                         | 3.22592e-25 | 1.000000 | 3.22592e-25 | 1.000000 |
| rad53                         | 5.58028e-28 | 1.000000 | 5.58028e-28 | 1.000000 |
| rad61                         | 1.51726e-29 | 1.000000 | 1.51726e-29 | 1.000000 |
| rad64                         | 2.69232e-31 | 1.000000 | 2.69232e-31 | 1.000000 |
| rad68syn                      | 1.00910e-31 | 1.000000 | 1.00910e-31 | 1.000000 |
| rad68anti                     | 8.15975e-32 | 1.000000 | 8.15975e-32 | 1.000000 |

|           |             |         |             |         |
|-----------|-------------|---------|-------------|---------|
| rad56     | 4.42537e-33 | 1.00000 | 4.42537e-33 | 1.00000 |
| rad19syn  | 4.52245e-34 | 1.00000 | 4.52245e-34 | 1.00000 |
| rad40syn  | 4.80946e-36 | 1.00000 | 4.80946e-36 | 1.00000 |
| rad40anti | 3.82754e-36 | 1.00000 | 3.82754e-36 | 1.00000 |
| rad73     | 8.11785e-38 | 1.00000 | 8.11785e-38 | 1.00000 |
| PAH8+H    | 1.94794e-38 | 1.00000 | 1.94794e-38 | 1.00000 |
| rad71     | 1.49246e-42 | 1.00000 | 1.49246e-42 | 1.00000 |
| rad8      | 9.67649e-43 | 1.00000 | 9.67649e-43 | 1.00000 |

10000.0000 Pa, 120.000000 K

=====

| Rate constant             | True (fraction)        | Effective (fraction)   |
|---------------------------|------------------------|------------------------|
| Total                     | 2.79817e-15 (1.00 )    | 2.79817e-15 (1.00 )    |
| Formation of rad19        | 2.79817e-15 (1.000 )   | 2.79817e-15 (1.000 )   |
| H-abstraction to cyc2enyl | 2.96039e-22 (1.06e-07) | 2.96039e-22 (1.06e-07) |
| H-abstraction to cyclenyl | 1.95323e-28 (6.98e-14) | 1.95323e-28 (6.98e-14) |

| species                       | PYtrue      | Cumul    | PYeffective | Cumul    |
|-------------------------------|-------------|----------|-------------|----------|
| rad9                          | 0.980784    | 0.980784 | 0.980784    | 0.980784 |
| Indene+H                      | 0.0167626   | 0.997546 | 0.0167626   | 0.997546 |
| rad15                         | 0.00245082  | 0.999997 | 0.00245082  | 0.999997 |
| PhCHCCH2+H                    | 2.22191e-06 | 1.000000 | 2.22191e-06 | 1.000000 |
| Benzene+cycloprop-2-enylidene | 1.05797e-07 | 1.000000 | 1.05797e-07 | 1.000000 |
| rad2                          | 8.33556e-08 | 1.000000 | 8.33556e-08 | 1.000000 |
| rad6                          | 7.74800e-08 | 1.000000 | 7.74800e-08 | 1.000000 |
| rad11                         | 2.78550e-08 | 1.000000 | 2.78550e-08 | 1.000000 |
| rad19anti                     | 2.10744e-08 | 1.000000 | 2.10744e-08 | 1.000000 |
| rad12                         | 2.06018e-08 | 1.000000 | 2.06018e-08 | 1.000000 |
| rad26                         | 1.32905e-08 | 1.000000 | 1.32905e-08 | 1.000000 |
| rad22                         | 1.05113e-08 | 1.000000 | 1.05113e-08 | 1.000000 |
| C2H2+PhCH2                    | 8.12963e-09 | 1.000000 | 8.12963e-09 | 1.000000 |
| rad23                         | 5.75480e-09 | 1.000000 | 5.75480e-09 | 1.000000 |
| rad1                          | 5.49353e-09 | 1.000000 | 5.49353e-09 | 1.000000 |
| rad67                         | 4.23331e-09 | 1.000000 | 4.23331e-09 | 1.000000 |
| rad10                         | 3.49419e-09 | 1.000000 | 3.49419e-09 | 1.000000 |
| rad45                         | 3.24042e-09 | 1.000000 | 3.24042e-09 | 1.000000 |
| rad35                         | 1.89009e-09 | 1.000000 | 1.89009e-09 | 1.000000 |
| rad3                          | 7.09539e-10 | 1.000000 | 7.09539e-10 | 1.000000 |
| rad4                          | 3.63002e-10 | 1.000000 | 3.63002e-10 | 1.000000 |
| PhCCCH3+H                     | 3.36748e-10 | 1.000000 | 3.36748e-10 | 1.000000 |
| rad18                         | 2.82227e-10 | 1.000000 | 2.82227e-10 | 1.000000 |
| Ph+MeAc                       | 2.15696e-10 | 1.000000 | 2.15696e-10 | 1.000000 |
| PhCCH+CH3                     | 2.12309e-10 | 1.000000 | 2.12309e-10 | 1.000000 |
| rad36                         | 1.99235e-10 | 1.000000 | 1.99235e-10 | 1.000000 |
| rad7                          | 7.72018e-11 | 1.000000 | 7.72018e-11 | 1.000000 |
| Ph+Allene                     | 5.43094e-11 | 1.000000 | 5.43094e-11 | 1.000000 |
| rad30                         | 3.12607e-11 | 1.000000 | 3.12607e-11 | 1.000000 |
| rad20                         | 1.93313e-11 | 1.000000 | 1.93313e-11 | 1.000000 |
| rad5                          | 1.49714e-11 | 1.000000 | 1.49714e-11 | 1.000000 |
| rad21                         | 1.33012e-11 | 1.000000 | 1.33012e-11 | 1.000000 |
| PhCH2CCH+H                    | 9.22024e-12 | 1.000000 | 9.22024e-12 | 1.000000 |
| PhcycC3H3_A+H                 | 2.21112e-12 | 1.000000 | 2.21112e-12 | 1.000000 |
| rad25                         | 9.63799e-13 | 1.000000 | 9.63799e-13 | 1.000000 |
| rad13                         | 7.50791e-13 | 1.000000 | 7.50791e-13 | 1.000000 |
| rad27                         | 7.42200e-13 | 1.000000 | 7.42200e-13 | 1.000000 |
| rad28                         | 3.22941e-13 | 1.000000 | 3.22941e-13 | 1.000000 |
| rad14                         | 3.19474e-13 | 1.000000 | 3.19474e-13 | 1.000000 |
| rad37                         | 1.71251e-13 | 1.000000 | 1.71251e-13 | 1.000000 |
| rad60syn                      | 1.25716e-13 | 1.000000 | 1.25716e-13 | 1.000000 |
| Benzene+cycloprop-1-enylidene | 6.98038e-14 | 1.000000 | 6.98038e-14 | 1.000000 |
| rad60anti                     | 6.11255e-14 | 1.000000 | 6.11255e-14 | 1.000000 |
| PAH3+H                        | 4.86879e-14 | 1.000000 | 4.86879e-14 | 1.000000 |
| PAH7+H                        | 3.00899e-14 | 1.000000 | 3.00899e-14 | 1.000000 |
| rad59                         | 1.00941e-14 | 1.000000 | 1.00941e-14 | 1.000000 |
| rad38                         | 8.70984e-15 | 1.000000 | 8.70984e-15 | 1.000000 |
| Phenyl+cycC3H4                | 7.86405e-15 | 1.000000 | 0.000000    | 1.000000 |
| PAH9+H                        | 6.03562e-15 | 1.000000 | 6.03562e-15 | 1.000000 |
| rad33                         | 1.07092e-15 | 1.000000 | 1.07092e-15 | 1.000000 |
| rad46                         | 5.02400e-16 | 1.000000 | 5.02400e-16 | 1.000000 |
| PhcycC3H3_B+H                 | 3.47939e-16 | 1.000000 | 3.47939e-16 | 1.000000 |
| PAH10+CH3                     | 1.76412e-16 | 1.000000 | 1.76412e-16 | 1.000000 |
| rad24                         | 1.21661e-16 | 1.000000 | 1.21661e-16 | 1.000000 |
| rad43                         | 2.77951e-17 | 1.000000 | 2.77951e-17 | 1.000000 |
| rad39                         | 8.49852e-18 | 1.000000 | 8.49852e-18 | 1.000000 |
| rad50                         | 2.61679e-18 | 1.000000 | 2.61679e-18 | 1.000000 |
| rad31                         | 1.87072e-18 | 1.000000 | 1.87072e-18 | 1.000000 |
| rad70                         | 1.60344e-18 | 1.000000 | 1.60344e-18 | 1.000000 |
| rad62                         | 1.35113e-18 | 1.000000 | 1.35113e-18 | 1.000000 |

|           |             |          |             |          |
|-----------|-------------|----------|-------------|----------|
| rad58     | 6.82803e-19 | 1.000000 | 6.82803e-19 | 1.000000 |
| rad54     | 7.97899e-20 | 1.000000 | 7.97899e-20 | 1.000000 |
| rad34     | 1.93366e-20 | 1.000000 | 1.93366e-20 | 1.000000 |
| rad52     | 1.56684e-20 | 1.000000 | 1.56684e-20 | 1.000000 |
| PAH1+H    | 1.13409e-20 | 1.000000 | 1.13409e-20 | 1.000000 |
| rad51     | 3.86454e-21 | 1.000000 | 3.86454e-21 | 1.000000 |
| rad41     | 7.70806e-22 | 1.000000 | 7.70806e-22 | 1.000000 |
| rad55     | 5.63070e-22 | 1.000000 | 5.63070e-22 | 1.000000 |
| rad42     | 1.38174e-22 | 1.000000 | 1.38174e-22 | 1.000000 |
| rad65     | 1.63826e-23 | 1.000000 | 1.63826e-23 | 1.000000 |
| rad47     | 3.84248e-25 | 1.000000 | 3.84248e-25 | 1.000000 |
| rad53     | 1.75422e-27 | 1.000000 | 1.75422e-27 | 1.000000 |
| rad61     | 1.08014e-28 | 1.000000 | 1.08014e-28 | 1.000000 |
| rad64     | 1.18651e-30 | 1.000000 | 1.18651e-30 | 1.000000 |
| rad68syn  | 1.06192e-30 | 1.000000 | 1.06192e-30 | 1.000000 |
| rad68anti | 8.54642e-31 | 1.000000 | 8.54642e-31 | 1.000000 |
| rad56     | 4.12577e-32 | 1.000000 | 4.12577e-32 | 1.000000 |
| rad19syn  | 9.71731e-34 | 1.000000 | 9.71731e-34 | 1.000000 |
| rad40syn  | 1.00090e-34 | 1.000000 | 1.00090e-34 | 1.000000 |
| rad40anti | 7.97825e-35 | 1.000000 | 7.97825e-35 | 1.000000 |
| rad73     | 1.44509e-36 | 1.000000 | 1.44509e-36 | 1.000000 |
| PAH8+H    | 6.33702e-37 | 1.000000 | 6.33702e-37 | 1.000000 |
| rad71     | 5.79877e-41 | 1.000000 | 5.79877e-41 | 1.000000 |
| rad8      | 6.40904e-43 | 1.000000 | 6.40904e-43 | 1.000000 |

10000.0000 Pa, 130.000000 K

| Rate constant             | True (fraction)        | Effective (fraction)   |
|---------------------------|------------------------|------------------------|
| Total                     | 3.81236e-15 (1.00 )    | 3.81236e-15 (1.00 )    |
| Formation of rad19        | 3.81236e-15 (1.000 )   | 3.81236e-15 (1.000 )   |
| H-abstraction to cyc2enyl | 1.44825e-21 (3.80e-07) | 1.44825e-21 (3.80e-07) |
| H-abstraction to cyclenyl | 2.94348e-27 (7.72e-13) | 2.94348e-27 (7.72e-13) |

| species                       | PYtrue      | Cumul    | PYeffective | Cumul    |
|-------------------------------|-------------|----------|-------------|----------|
| rad9                          | 0.979128    | 0.979128 | 0.979128    | 0.979128 |
| Indene+H                      | 0.0184568   | 0.997584 | 0.0184568   | 0.997584 |
| rad15                         | 0.00241237  | 0.999997 | 0.00241237  | 0.999997 |
| PhCHCCH2+H                    | 2.52551e-06 | 0.999999 | 2.52551e-06 | 0.999999 |
| Benzene+cycloprop-2-enylidene | 3.79882e-07 | 1.000000 | 3.79882e-07 | 1.000000 |
| rad2                          | 9.45570e-08 | 1.000000 | 9.45570e-08 | 1.000000 |
| rad6                          | 9.14648e-08 | 1.000000 | 9.14648e-08 | 1.000000 |
| rad11                         | 2.81278e-08 | 1.000000 | 2.81278e-08 | 1.000000 |
| rad19anti                     | 2.00863e-08 | 1.000000 | 2.00863e-08 | 1.000000 |
| rad12                         | 1.98091e-08 | 1.000000 | 1.98091e-08 | 1.000000 |
| rad26                         | 1.51430e-08 | 1.000000 | 1.51430e-08 | 1.000000 |
| rad22                         | 1.08157e-08 | 1.000000 | 1.08157e-08 | 1.000000 |
| C2H2+PhCH2                    | 9.51029e-09 | 1.000000 | 9.51029e-09 | 1.000000 |
| rad23                         | 6.90738e-09 | 1.000000 | 6.90738e-09 | 1.000000 |
| rad1                          | 6.24989e-09 | 1.000000 | 6.24989e-09 | 1.000000 |
| rad67                         | 4.91195e-09 | 1.000000 | 4.91195e-09 | 1.000000 |
| rad10                         | 4.31017e-09 | 1.000000 | 4.31017e-09 | 1.000000 |
| rad45                         | 3.60515e-09 | 1.000000 | 3.60515e-09 | 1.000000 |
| rad35                         | 2.18842e-09 | 1.000000 | 2.18842e-09 | 1.000000 |
| rad3                          | 8.51884e-10 | 1.000000 | 8.51884e-10 | 1.000000 |
| PhCCCH3+H                     | 4.36500e-10 | 1.000000 | 4.36500e-10 | 1.000000 |
| rad4                          | 4.36080e-10 | 1.000000 | 4.36080e-10 | 1.000000 |
| PhCCH+CH3                     | 2.94596e-10 | 1.000000 | 2.94596e-10 | 1.000000 |
| Ph+MeAc                       | 2.83280e-10 | 1.000000 | 2.83280e-10 | 1.000000 |
| rad18                         | 2.50019e-10 | 1.000000 | 2.50019e-10 | 1.000000 |
| rad36                         | 2.21764e-10 | 1.000000 | 2.21764e-10 | 1.000000 |
| rad7                          | 9.13281e-11 | 1.000000 | 9.13281e-11 | 1.000000 |
| Ph+Allene                     | 6.77984e-11 | 1.000000 | 6.77984e-11 | 1.000000 |
| rad30                         | 3.63958e-11 | 1.000000 | 3.63958e-11 | 1.000000 |
| rad20                         | 1.75743e-11 | 1.000000 | 1.75743e-11 | 1.000000 |
| rad5                          | 1.73935e-11 | 1.000000 | 1.73935e-11 | 1.000000 |
| rad21                         | 1.20835e-11 | 1.000000 | 1.20835e-11 | 1.000000 |
| PhCH2CCH+H                    | 1.17044e-11 | 1.000000 | 1.17044e-11 | 1.000000 |
| PhcycC3H3_A+H                 | 2.78560e-12 | 1.000000 | 2.78560e-12 | 1.000000 |
| rad25                         | 9.52331e-13 | 1.000000 | 9.52331e-13 | 1.000000 |
| rad13                         | 8.54531e-13 | 1.000000 | 8.54531e-13 | 1.000000 |
| rad27                         | 8.15138e-13 | 1.000000 | 8.15138e-13 | 1.000000 |
| Benzene+cycloprop-1-enylidene | 7.72089e-13 | 1.000000 | 7.72089e-13 | 1.000000 |
| rad28                         | 4.40960e-13 | 1.000000 | 4.40960e-13 | 1.000000 |
| rad14                         | 3.83636e-13 | 1.000000 | 3.83636e-13 | 1.000000 |
| rad37                         | 2.26155e-13 | 1.000000 | 2.26155e-13 | 1.000000 |
| rad60syn                      | 1.49692e-13 | 1.000000 | 1.49692e-13 | 1.000000 |
| rad60anti                     | 7.29272e-14 | 1.000000 | 7.29272e-14 | 1.000000 |
| PAH3+H                        | 5.95777e-14 | 1.000000 | 5.95777e-14 | 1.000000 |



|                |             |         |             |         |
|----------------|-------------|---------|-------------|---------|
| PAH7+H         | 3.85556e-14 | 1.00000 | 3.85556e-14 | 1.00000 |
| rad59          | 1.23024e-14 | 1.00000 | 1.23024e-14 | 1.00000 |
| Phenyl+cycC3H4 | 1.18033e-14 | 1.00000 | 0.00000     | 1.00000 |
| rad38          | 1.14495e-14 | 1.00000 | 1.14495e-14 | 1.00000 |
| PAH9+H         | 8.52764e-15 | 1.00000 | 8.52764e-15 | 1.00000 |
| rad33          | 1.20775e-15 | 1.00000 | 1.20775e-15 | 1.00000 |
| PhcycC3H3_B+H  | 8.48155e-16 | 1.00000 | 8.48155e-16 | 1.00000 |
| rad46          | 6.67948e-16 | 1.00000 | 6.67948e-16 | 1.00000 |
| PAH10+CH3      | 2.52193e-16 | 1.00000 | 2.52193e-16 | 1.00000 |
| rad24          | 1.30129e-16 | 1.00000 | 1.30129e-16 | 1.00000 |
| rad43          | 3.98889e-17 | 1.00000 | 3.98889e-17 | 1.00000 |
| rad39          | 1.36823e-17 | 1.00000 | 1.36823e-17 | 1.00000 |
| rad50          | 3.64577e-18 | 1.00000 | 3.64577e-18 | 1.00000 |
| rad70          | 2.29459e-18 | 1.00000 | 2.29459e-18 | 1.00000 |
| rad31          | 2.20215e-18 | 1.00000 | 2.20215e-18 | 1.00000 |
| rad62          | 2.17995e-18 | 1.00000 | 2.17995e-18 | 1.00000 |
| rad58          | 9.24256e-19 | 1.00000 | 9.24256e-19 | 1.00000 |
| rad54          | 1.23201e-19 | 1.00000 | 1.23201e-19 | 1.00000 |
| rad34          | 2.98206e-20 | 1.00000 | 2.98206e-20 | 1.00000 |
| rad52          | 2.26023e-20 | 1.00000 | 2.26023e-20 | 1.00000 |
| PAH1+H         | 1.84163e-20 | 1.00000 | 1.84163e-20 | 1.00000 |
| rad51          | 5.80959e-21 | 1.00000 | 5.80959e-21 | 1.00000 |
| rad41          | 1.37766e-21 | 1.00000 | 1.37766e-21 | 1.00000 |
| rad55          | 9.18556e-22 | 1.00000 | 9.18556e-22 | 1.00000 |
| rad42          | 2.72593e-22 | 1.00000 | 2.72593e-22 | 1.00000 |
| rad65          | 2.74589e-23 | 1.00000 | 2.74589e-23 | 1.00000 |
| rad47          | 4.55296e-25 | 1.00000 | 4.55296e-25 | 1.00000 |
| rad53          | 5.28700e-27 | 1.00000 | 5.28700e-27 | 1.00000 |
| rad61          | 6.77559e-28 | 1.00000 | 6.77559e-28 | 1.00000 |
| rad68syn       | 9.45237e-30 | 1.00000 | 9.45237e-30 | 1.00000 |
| rad68anti      | 7.56944e-30 | 1.00000 | 7.56944e-30 | 1.00000 |
| rad64          | 5.00478e-30 | 1.00000 | 5.00478e-30 | 1.00000 |
| rad56          | 3.39341e-31 | 1.00000 | 3.39341e-31 | 1.00000 |
| rad19syn       | 2.18658e-33 | 1.00000 | 2.18658e-33 | 1.00000 |
| rad40syn       | 1.84657e-33 | 1.00000 | 1.84657e-33 | 1.00000 |
| rad40anti      | 1.47675e-33 | 1.00000 | 1.47675e-33 | 1.00000 |
| rad73          | 2.27266e-35 | 1.00000 | 2.27266e-35 | 1.00000 |
| PAH8+H         | 1.89469e-35 | 1.00000 | 1.89469e-35 | 1.00000 |
| rad71          | 2.10695e-39 | 1.00000 | 2.10695e-39 | 1.00000 |
| rad8           | 4.73416e-43 | 1.00000 | 4.73416e-43 | 1.00000 |

10000.0000 Pa, 140.000000 K

| Rate constant             | True (fraction)        | Effective (fraction)   |
|---------------------------|------------------------|------------------------|
| Total                     | 4.99515e-15 (1.00)     | 4.99515e-15 (1.00)     |
| Formation of rad19        | 4.99514e-15 (1.000)    | 4.99514e-15 (1.000)    |
| H-abstraction to cyc2enyl | 5.62488e-21 (1.13e-06) | 5.62488e-21 (1.13e-06) |
| H-abstraction to cyclenyl | 3.00047e-26 (6.01e-12) | 3.00047e-26 (6.01e-12) |

| species                       | PYtrue      | Cumul    | PYeffective | Cumul    |
|-------------------------------|-------------|----------|-------------|----------|
| rad9                          | 0.977411    | 0.977411 | 0.977411    | 0.977411 |
| Indene+H                      | 0.0202070   | 0.997618 | 0.0202070   | 0.997618 |
| rad15                         | 0.00237739  | 0.999995 | 0.00237739  | 0.999995 |
| PhCHCCH2+H                    | 2.86042e-06 | 0.999998 | 2.86042e-06 | 0.999998 |
| Benzene+cycloprop-2-enylidene | 1.12607e-06 | 0.999999 | 1.12607e-06 | 0.999999 |
| rad6                          | 1.07089e-07 | 0.999999 | 1.07089e-07 | 0.999999 |
| rad2                          | 1.06873e-07 | 0.999999 | 1.06873e-07 | 0.999999 |
| rad11                         | 2.82721e-08 | 0.999999 | 2.82721e-08 | 0.999999 |
| rad19anti                     | 1.92531e-08 | 1.000000 | 1.92531e-08 | 1.000000 |
| rad12                         | 1.91338e-08 | 1.000000 | 1.91338e-08 | 1.000000 |
| rad26                         | 1.71943e-08 | 1.000000 | 1.71943e-08 | 1.000000 |
| C2H2+PhCH2                    | 1.10714e-08 | 1.000000 | 1.10714e-08 | 1.000000 |
| rad22                         | 1.10606e-08 | 1.000000 | 1.10606e-08 | 1.000000 |
| rad23                         | 8.20063e-09 | 1.000000 | 8.20063e-09 | 1.000000 |
| rad1                          | 7.08841e-09 | 1.000000 | 7.08841e-09 | 1.000000 |
| rad67                         | 5.67791e-09 | 1.000000 | 5.67791e-09 | 1.000000 |
| rad10                         | 5.26949e-09 | 1.000000 | 5.26949e-09 | 1.000000 |
| rad45                         | 3.99579e-09 | 1.000000 | 3.99579e-09 | 1.000000 |
| rad35                         | 2.52406e-09 | 1.000000 | 2.52406e-09 | 1.000000 |
| rad3                          | 1.01297e-09 | 1.000000 | 1.01297e-09 | 1.000000 |
| PhCCCH3+H                     | 5.62640e-10 | 1.000000 | 5.62640e-10 | 1.000000 |
| rad4                          | 5.18932e-10 | 1.000000 | 5.18932e-10 | 1.000000 |
| PhCCH+CH3                     | 4.04148e-10 | 1.000000 | 4.04148e-10 | 1.000000 |
| Ph+MeAc                       | 3.70298e-10 | 1.000000 | 3.70298e-10 | 1.000000 |
| rad36                         | 2.45974e-10 | 1.000000 | 2.45974e-10 | 1.000000 |
| rad18                         | 2.23732e-10 | 1.000000 | 2.23732e-10 | 1.000000 |
| rad7                          | 1.07574e-10 | 1.000000 | 1.07574e-10 | 1.000000 |
| Ph+Allene                     | 8.41307e-11 | 1.000000 | 8.41307e-11 | 1.000000 |

|                               |             |          |             |          |
|-------------------------------|-------------|----------|-------------|----------|
| rad30                         | 4.21865e-11 | 1.000000 | 4.21865e-11 | 1.000000 |
| rad5                          | 2.01472e-11 | 1.000000 | 2.01472e-11 | 1.000000 |
| rad20                         | 1.61011e-11 | 1.000000 | 1.61011e-11 | 1.000000 |
| PhCH2CCH+H                    | 1.47832e-11 | 1.000000 | 1.47832e-11 | 1.000000 |
| rad21                         | 1.10620e-11 | 1.000000 | 1.10620e-11 | 1.000000 |
| Benzene+cycloprop-1-enylidene | 6.00677e-12 | 1.000000 | 6.00677e-12 | 1.000000 |
| PhcycC3H3_A+H                 | 3.53390e-12 | 1.000000 | 3.53390e-12 | 1.000000 |
| rad13                         | 9.67882e-13 | 1.000000 | 9.67882e-13 | 1.000000 |
| rad25                         | 9.38423e-13 | 1.000000 | 9.38423e-13 | 1.000000 |
| rad27                         | 8.94667e-13 | 1.000000 | 8.94667e-13 | 1.000000 |
| rad28                         | 5.96381e-13 | 1.000000 | 5.96381e-13 | 1.000000 |
| rad14                         | 4.55672e-13 | 1.000000 | 4.55672e-13 | 1.000000 |
| rad37                         | 2.97434e-13 | 1.000000 | 2.97434e-13 | 1.000000 |
| rad60syn                      | 1.77592e-13 | 1.000000 | 1.77592e-13 | 1.000000 |
| rad60anti                     | 8.66980e-14 | 1.000000 | 8.66980e-14 | 1.000000 |
| PAH3+H                        | 7.27324e-14 | 1.000000 | 7.27324e-14 | 1.000000 |
| PAH7+H                        | 4.91029e-14 | 1.000000 | 4.91029e-14 | 1.000000 |
| Phenyl+cycC3H4                | 1.75966e-14 | 1.000000 | 0.000000    | 1.000000 |
| rad59                         | 1.49550e-14 | 1.000000 | 1.49550e-14 | 1.000000 |
| rad38                         | 1.49364e-14 | 1.000000 | 1.49364e-14 | 1.000000 |
| PAH9+H                        | 1.18891e-14 | 1.000000 | 1.18891e-14 | 1.000000 |
| PhcycC3H3_B+H                 | 1.89911e-15 | 1.000000 | 1.89911e-15 | 1.000000 |
| rad33                         | 1.35706e-15 | 1.000000 | 1.35706e-15 | 1.000000 |
| rad46                         | 8.81490e-16 | 1.000000 | 8.81490e-16 | 1.000000 |
| PAH10+CH3                     | 3.61441e-16 | 1.000000 | 3.61441e-16 | 1.000000 |
| rad24                         | 1.39375e-16 | 1.000000 | 1.39375e-16 | 1.000000 |
| rad43                         | 5.72585e-17 | 1.000000 | 5.72585e-17 | 1.000000 |
| rad39                         | 2.18872e-17 | 1.000000 | 2.18872e-17 | 1.000000 |
| rad50                         | 5.05715e-18 | 1.000000 | 5.05715e-18 | 1.000000 |
| rad62                         | 3.49280e-18 | 1.000000 | 3.49280e-18 | 1.000000 |
| rad70                         | 3.28159e-18 | 1.000000 | 3.28159e-18 | 1.000000 |
| rad31                         | 2.58993e-18 | 1.000000 | 2.58993e-18 | 1.000000 |
| rad58                         | 1.25449e-18 | 1.000000 | 1.25449e-18 | 1.000000 |
| rad54                         | 1.89974e-19 | 1.000000 | 1.89974e-19 | 1.000000 |
| rad34                         | 4.60814e-20 | 1.000000 | 4.60814e-20 | 1.000000 |
| rad52                         | 3.25413e-20 | 1.000000 | 3.25413e-20 | 1.000000 |
| PAH1+H                        | 3.02154e-20 | 1.000000 | 3.02154e-20 | 1.000000 |
| rad51                         | 8.74180e-21 | 1.000000 | 8.74180e-21 | 1.000000 |
| rad41                         | 2.47747e-21 | 1.000000 | 2.47747e-21 | 1.000000 |
| rad55                         | 1.50186e-21 | 1.000000 | 1.50186e-21 | 1.000000 |
| rad42                         | 5.36034e-22 | 1.000000 | 5.36034e-22 | 1.000000 |
| rad65                         | 4.59651e-23 | 1.000000 | 4.59651e-23 | 1.000000 |
| rad47                         | 5.38036e-25 | 1.000000 | 5.38036e-25 | 1.000000 |
| rad53                         | 1.53578e-26 | 1.000000 | 1.53578e-26 | 1.000000 |
| rad61                         | 3.70786e-27 | 1.000000 | 3.70786e-27 | 1.000000 |
| rad68syn                      | 6.92304e-29 | 1.000000 | 6.92304e-29 | 1.000000 |
| rad68anti                     | 5.51477e-29 | 1.000000 | 5.51477e-29 | 1.000000 |
| rad64                         | 2.01888e-29 | 1.000000 | 2.01888e-29 | 1.000000 |
| rad56                         | 2.39726e-30 | 1.000000 | 2.39726e-30 | 1.000000 |
| rad40syn                      | 2.74355e-32 | 1.000000 | 2.74355e-32 | 1.000000 |
| rad40anti                     | 2.20486e-32 | 1.000000 | 2.20486e-32 | 1.000000 |
| rad19syn                      | 5.16045e-33 | 1.000000 | 5.16045e-33 | 1.000000 |
| PAH8+H                        | 4.48648e-34 | 1.000000 | 4.48648e-34 | 1.000000 |
| rad73                         | 2.93050e-34 | 1.000000 | 2.93050e-34 | 1.000000 |
| rad71                         | 6.01880e-38 | 1.000000 | 6.01880e-38 | 1.000000 |
| rad8                          | 3.82704e-43 | 1.000000 | 3.82704e-43 | 1.000000 |

10000.0000 Pa, 150.000000 K

=====

| Rate constant             | True (fraction)        | Effective (fraction)   |
|---------------------------|------------------------|------------------------|
| Total                     | 6.34137e-15 (1.00 )    | 6.34137e-15 (1.00 )    |
| Formation of rad19        | 6.34135e-15 (1.000 )   | 6.34135e-15 (1.000 )   |
| H-abstraction to cyc2enyl | 1.81685e-20 (2.87e-06) | 1.81685e-20 (2.87e-06) |
| H-abstraction to cyclenyl | 2.23765e-25 (3.53e-11) | 2.23765e-25 (3.53e-11) |

| species                       | PYtrue      | Cumul    | PYeffective | Cumul    |
|-------------------------------|-------------|----------|-------------|----------|
| rad9                          | 0.975625    | 0.975625 | 0.975625    | 0.975625 |
| Indene+H                      | 0.0220227   | 0.997648 | 0.0220227   | 0.997648 |
| rad15                         | 0.00234525  | 0.999993 | 0.00234525  | 0.999993 |
| PhCHCCH2+H                    | 3.23229e-06 | 0.999996 | 3.23229e-06 | 0.999996 |
| Benzene+cycloprop-2-enylidene | 2.86508e-06 | 0.999999 | 2.86508e-06 | 0.999999 |
| rad6                          | 1.24617e-07 | 0.999999 | 1.24617e-07 | 0.999999 |
| rad2                          | 1.20497e-07 | 1.000000 | 1.20497e-07 | 1.000000 |
| rad11                         | 2.83080e-08 | 1.000000 | 2.83080e-08 | 1.000000 |
| rad26                         | 1.94807e-08 | 1.000000 | 1.94807e-08 | 1.000000 |
| rad12                         | 1.85526e-08 | 1.000000 | 1.85526e-08 | 1.000000 |
| rad19anti                     | 1.85457e-08 | 1.000000 | 1.85457e-08 | 1.000000 |
| C2H2+PhCH2                    | 1.28484e-08 | 1.000000 | 1.28484e-08 | 1.000000 |

|                               |             |          |             |          |
|-------------------------------|-------------|----------|-------------|----------|
| rad22                         | 1.12530e-08 | 1.000000 | 1.12530e-08 | 1.000000 |
| rad23                         | 9.65411e-09 | 1.000000 | 9.65411e-09 | 1.000000 |
| rad1                          | 8.02420e-09 | 1.000000 | 8.02420e-09 | 1.000000 |
| rad67                         | 6.54861e-09 | 1.000000 | 6.54861e-09 | 1.000000 |
| rad10                         | 6.39889e-09 | 1.000000 | 6.39889e-09 | 1.000000 |
| rad45                         | 4.41812e-09 | 1.000000 | 4.41812e-09 | 1.000000 |
| rad35                         | 2.90433e-09 | 1.000000 | 2.90433e-09 | 1.000000 |
| rad3                          | 1.19541e-09 | 1.000000 | 1.19541e-09 | 1.000000 |
| PhCCCH3+H                     | 7.23062e-10 | 1.000000 | 7.23062e-10 | 1.000000 |
| rad4                          | 6.12967e-10 | 1.000000 | 6.12967e-10 | 1.000000 |
| PhCCH+CH3                     | 5.49990e-10 | 1.000000 | 5.49990e-10 | 1.000000 |
| Ph+MeAc                       | 4.83073e-10 | 1.000000 | 4.83073e-10 | 1.000000 |
| rad36                         | 2.72246e-10 | 1.000000 | 2.72246e-10 | 1.000000 |
| rad18                         | 2.01922e-10 | 1.000000 | 2.01922e-10 | 1.000000 |
| rad7                          | 1.26169e-10 | 1.000000 | 1.26169e-10 | 1.000000 |
| Ph+Allene                     | 1.04019e-10 | 1.000000 | 1.04019e-10 | 1.000000 |
| rad30                         | 4.87639e-11 | 1.000000 | 4.87639e-11 | 1.000000 |
| Benzene+cycloprop-1-enylidene | 3.52865e-11 | 1.000000 | 3.52865e-11 | 1.000000 |
| rad5                          | 2.32901e-11 | 1.000000 | 2.32901e-11 | 1.000000 |
| PhCH2CCH+H                    | 1.86239e-11 | 1.000000 | 1.86239e-11 | 1.000000 |
| rad20                         | 1.48436e-11 | 1.000000 | 1.48436e-11 | 1.000000 |
| rad21                         | 1.01900e-11 | 1.000000 | 1.01900e-11 | 1.000000 |
| PhcycC3H3_A+H                 | 4.51550e-12 | 1.000000 | 4.51550e-12 | 1.000000 |
| rad13                         | 1.09264e-12 | 1.000000 | 1.09264e-12 | 1.000000 |
| rad27                         | 9.82062e-13 | 1.000000 | 9.82062e-13 | 1.000000 |
| rad25                         | 9.22689e-13 | 1.000000 | 9.22689e-13 | 1.000000 |
| rad28                         | 8.01545e-13 | 1.000000 | 8.01545e-13 | 1.000000 |
| rad14                         | 5.36642e-13 | 1.000000 | 5.36642e-13 | 1.000000 |
| rad37                         | 3.90671e-13 | 1.000000 | 3.90671e-13 | 1.000000 |
| rad60syn                      | 2.10324e-13 | 1.000000 | 2.10324e-13 | 1.000000 |
| rad60anti                     | 1.02900e-13 | 1.000000 | 1.02900e-13 | 1.000000 |
| PAH3+H                        | 8.87728e-14 | 1.000000 | 8.87728e-14 | 1.000000 |
| PAH7+H                        | 6.23266e-14 | 1.000000 | 6.23266e-14 | 1.000000 |
| Phenyl+cycC3H4                | 2.61227e-14 | 1.000000 | 0.00000     | 1.000000 |
| rad38                         | 1.93996e-14 | 1.000000 | 1.93996e-14 | 1.000000 |
| rad59                         | 1.81705e-14 | 1.000000 | 1.81705e-14 | 1.000000 |
| PAH9+H                        | 1.64253e-14 | 1.000000 | 1.64253e-14 | 1.000000 |
| PhcycC3H3_B+H                 | 3.97977e-15 | 1.000000 | 3.97977e-15 | 1.000000 |
| rad33                         | 1.52131e-15 | 1.000000 | 1.52131e-15 | 1.000000 |
| rad46                         | 1.15856e-15 | 1.000000 | 1.15856e-15 | 1.000000 |
| PAH10+CH3                     | 5.21039e-16 | 1.000000 | 5.21039e-16 | 1.000000 |
| rad24                         | 1.49534e-16 | 1.000000 | 1.49534e-16 | 1.000000 |
| rad43                         | 8.24852e-17 | 1.000000 | 8.24852e-17 | 1.000000 |
| rad39                         | 3.49629e-17 | 1.000000 | 3.49629e-17 | 1.000000 |
| rad50                         | 7.01032e-18 | 1.000000 | 7.01032e-18 | 1.000000 |
| rad62                         | 5.57990e-18 | 1.000000 | 5.57990e-18 | 1.000000 |
| rad70                         | 4.70434e-18 | 1.000000 | 4.70434e-18 | 1.000000 |
| rad31                         | 3.04754e-18 | 1.000000 | 3.04754e-18 | 1.000000 |
| rad58                         | 1.71165e-18 | 1.000000 | 1.71165e-18 | 1.000000 |
| rad54                         | 2.93777e-19 | 1.000000 | 2.93777e-19 | 1.000000 |
| rad34                         | 7.15429e-20 | 1.000000 | 7.15429e-20 | 1.000000 |
| PAH1+H                        | 5.02276e-20 | 1.000000 | 5.02276e-20 | 1.000000 |
| rad52                         | 4.69443e-20 | 1.000000 | 4.69443e-20 | 1.000000 |
| rad51                         | 1.32200e-20 | 1.000000 | 1.32200e-20 | 1.000000 |
| rad41                         | 4.49207e-21 | 1.000000 | 4.49207e-21 | 1.000000 |
| rad55                         | 2.47116e-21 | 1.000000 | 2.47116e-21 | 1.000000 |
| rad42                         | 1.05302e-21 | 1.000000 | 1.05302e-21 | 1.000000 |
| rad65                         | 7.72221e-23 | 1.000000 | 7.72221e-23 | 1.000000 |
| rad47                         | 6.35440e-25 | 1.000000 | 6.35440e-25 | 1.000000 |
| rad53                         | 4.32306e-26 | 1.000000 | 4.32306e-26 | 1.000000 |
| rad61                         | 1.78918e-26 | 1.000000 | 1.78918e-26 | 1.000000 |
| rad68syn                      | 4.22095e-28 | 1.000000 | 4.22095e-28 | 1.000000 |
| rad68anti                     | 3.34316e-28 | 1.000000 | 3.34316e-28 | 1.000000 |
| rad64                         | 7.81039e-29 | 1.000000 | 7.81039e-29 | 1.000000 |
| rad56                         | 1.46238e-29 | 1.000000 | 1.46238e-29 | 1.000000 |
| rad40syn                      | 3.22322e-31 | 1.000000 | 3.22322e-31 | 1.000000 |
| rad40anti                     | 2.60570e-31 | 1.000000 | 2.60570e-31 | 1.000000 |
| rad19syn                      | 1.27909e-32 | 1.000000 | 1.27909e-32 | 1.000000 |
| PAH8+H                        | 8.06482e-33 | 1.000000 | 8.06482e-33 | 1.000000 |
| rad73                         | 3.06802e-33 | 1.000000 | 3.06802e-33 | 1.000000 |
| rad71                         | 1.29237e-36 | 1.000000 | 1.29237e-36 | 1.000000 |
| rad8                          | 3.33872e-43 | 1.000000 | 3.33872e-43 | 1.000000 |

10000.0000 Pa, 160.000000 K

| Rate constant             | True (fraction)        | Effective (fraction)   |
|---------------------------|------------------------|------------------------|
| Total                     | 7.84423e-15 (1.00)     | 7.84423e-15 (1.00)     |
| Formation of rad19        | 7.84418e-15 (1.000)    | 7.84418e-15 (1.000)    |
| H-abstraction to cyc2enyl | 5.05321e-20 (6.44e-06) | 5.05321e-20 (6.44e-06) |

H-abstraction to cyclenyl | 1.29479e-24 (1.65e-10) 1.29479e-24 (1.65e-10)

| species                       | PYtrue      | Cumul    | PYeffective | Cumul    |
|-------------------------------|-------------|----------|-------------|----------|
| rad9                          | 0.973760    | 0.973760 | 0.973760    | 0.973760 |
| Indene+H                      | 0.0239146   | 0.997674 | 0.0239146   | 0.997674 |
| rad15                         | 0.00231549  | 0.999990 | 0.00231549  | 0.999990 |
| Benzene+cycloprop-2-enylidene | 6.44194e-06 | 0.999996 | 6.44194e-06 | 0.999996 |
| PhCHCCH2+H                    | 3.64790e-06 | 1.000000 | 3.64790e-06 | 1.000000 |
| rad6                          | 1.44368e-07 | 1.000000 | 1.44368e-07 | 1.000000 |
| rad2                          | 1.35656e-07 | 1.000000 | 1.35656e-07 | 1.000000 |
| rad11                         | 2.82523e-08 | 1.000000 | 2.82523e-08 | 1.000000 |
| rad26                         | 2.20460e-08 | 1.000000 | 2.20460e-08 | 1.000000 |
| rad12                         | 1.80486e-08 | 1.000000 | 1.80486e-08 | 1.000000 |
| rad19anti                     | 1.79433e-08 | 1.000000 | 1.79433e-08 | 1.000000 |
| C2H2+PhCH2                    | 1.48848e-08 | 1.000000 | 1.48848e-08 | 1.000000 |
| rad22                         | 1.13989e-08 | 1.000000 | 1.13989e-08 | 1.000000 |
| rad23                         | 1.12917e-08 | 1.000000 | 1.12917e-08 | 1.000000 |
| rad1                          | 9.07519e-09 | 1.000000 | 9.07519e-09 | 1.000000 |
| rad10                         | 7.73096e-09 | 1.000000 | 7.73096e-09 | 1.000000 |
| rad67                         | 7.54535e-09 | 1.000000 | 7.54535e-09 | 1.000000 |
| rad45                         | 4.87882e-09 | 1.000000 | 4.87882e-09 | 1.000000 |
| rad35                         | 3.33820e-09 | 1.000000 | 3.33820e-09 | 1.000000 |
| rad3                          | 1.40233e-09 | 1.000000 | 1.40233e-09 | 1.000000 |
| PhCCCH3+H                     | 9.28431e-10 | 1.000000 | 9.28431e-10 | 1.000000 |
| PhCCH+CH3                     | 7.44418e-10 | 1.000000 | 7.44418e-10 | 1.000000 |
| rad4                          | 7.19869e-10 | 1.000000 | 7.19869e-10 | 1.000000 |
| Ph+MeAc                       | 6.30321e-10 | 1.000000 | 6.30321e-10 | 1.000000 |
| rad36                         | 3.01026e-10 | 1.000000 | 3.01026e-10 | 1.000000 |
| rad18                         | 1.83571e-10 | 1.000000 | 1.83571e-10 | 1.000000 |
| Benzene+cycloprop-1-enylidene | 1.65062e-10 | 1.000000 | 1.65062e-10 | 1.000000 |
| rad7                          | 1.47413e-10 | 1.000000 | 1.47413e-10 | 1.000000 |
| Ph+Allene                     | 1.28389e-10 | 1.000000 | 1.28389e-10 | 1.000000 |
| rad30                         | 5.62885e-11 | 1.000000 | 5.62885e-11 | 1.000000 |
| rad5                          | 2.68883e-11 | 1.000000 | 2.68883e-11 | 1.000000 |
| PhCH2CCH+H                    | 2.34493e-11 | 1.000000 | 2.34493e-11 | 1.000000 |
| rad20                         | 1.37544e-11 | 1.000000 | 1.37544e-11 | 1.000000 |
| rad21                         | 9.43474e-12 | 1.000000 | 9.43474e-12 | 1.000000 |
| PhcycC3H3_A+H                 | 5.81125e-12 | 1.000000 | 5.81125e-12 | 1.000000 |
| rad13                         | 1.23092e-12 | 1.000000 | 1.23092e-12 | 1.000000 |
| rad27                         | 1.07878e-12 | 1.000000 | 1.07878e-12 | 1.000000 |
| rad28                         | 1.07344e-12 | 1.000000 | 1.07344e-12 | 1.000000 |
| rad25                         | 9.05586e-13 | 1.000000 | 9.05586e-13 | 1.000000 |
| rad14                         | 6.27814e-13 | 1.000000 | 6.27814e-13 | 1.000000 |
| rad37                         | 5.13686e-13 | 1.000000 | 5.13686e-13 | 1.000000 |
| rad60syn                      | 2.49043e-13 | 1.000000 | 2.49043e-13 | 1.000000 |
| rad60anti                     | 1.22119e-13 | 1.000000 | 1.22119e-13 | 1.000000 |
| PAH3+H                        | 1.08518e-13 | 1.000000 | 1.08518e-13 | 1.000000 |
| PAH7+H                        | 7.90226e-14 | 1.000000 | 7.90226e-14 | 1.000000 |
| Phenyl+cycC3H4                | 3.86810e-14 | 1.000000 | 0.000000    | 1.000000 |
| rad38                         | 2.51543e-14 | 1.000000 | 2.51543e-14 | 1.000000 |
| PAH9+H                        | 2.25632e-14 | 1.000000 | 2.25632e-14 | 1.000000 |
| rad59                         | 2.21045e-14 | 1.000000 | 2.21045e-14 | 1.000000 |
| PhcycC3H3_B+H                 | 7.91344e-15 | 1.000000 | 7.91344e-15 | 1.000000 |
| rad33                         | 1.70341e-15 | 1.000000 | 1.70341e-15 | 1.000000 |
| rad46                         | 1.52067e-15 | 1.000000 | 1.52067e-15 | 1.000000 |
| PAH10+CH3                     | 7.57505e-16 | 1.000000 | 7.57505e-16 | 1.000000 |
| rad24                         | 1.60770e-16 | 1.000000 | 1.60770e-16 | 1.000000 |
| rad43                         | 1.19561e-16 | 1.000000 | 1.19561e-16 | 1.000000 |
| rad39                         | 5.59978e-17 | 1.000000 | 5.59978e-17 | 1.000000 |
| rad50                         | 9.74128e-18 | 1.000000 | 9.74128e-18 | 1.000000 |
| rad62                         | 8.91355e-18 | 1.000000 | 8.91355e-18 | 1.000000 |
| rad70                         | 6.77515e-18 | 1.000000 | 6.77515e-18 | 1.000000 |
| rad31                         | 3.59223e-18 | 1.000000 | 3.59223e-18 | 1.000000 |
| rad58                         | 2.35211e-18 | 1.000000 | 2.35211e-18 | 1.000000 |
| rad54                         | 4.57102e-19 | 1.000000 | 4.57102e-19 | 1.000000 |
| rad34                         | 1.11783e-19 | 1.000000 | 1.11783e-19 | 1.000000 |
| PAH1+H                        | 8.47395e-20 | 1.000000 | 8.47395e-20 | 1.000000 |
| rad52                         | 6.80747e-20 | 1.000000 | 6.80747e-20 | 1.000000 |
| rad51                         | 2.01570e-20 | 1.000000 | 2.01570e-20 | 1.000000 |
| rad41                         | 8.21939e-21 | 1.000000 | 8.21939e-21 | 1.000000 |
| rad55                         | 4.10378e-21 | 1.000000 | 4.10378e-21 | 1.000000 |
| rad42                         | 2.06830e-21 | 1.000000 | 2.06830e-21 | 1.000000 |
| rad65                         | 1.30666e-22 | 1.000000 | 1.30666e-22 | 1.000000 |
| rad47                         | 7.51376e-25 | 1.000000 | 7.51376e-25 | 1.000000 |
| rad53                         | 1.18466e-25 | 1.000000 | 1.18466e-25 | 1.000000 |
| rad61                         | 7.73896e-26 | 1.000000 | 7.73896e-26 | 1.000000 |
| rad68syn                      | 2.19180e-27 | 1.000000 | 2.19180e-27 | 1.000000 |
| rad68anti                     | 1.72517e-27 | 1.000000 | 1.72517e-27 | 1.000000 |
| rad64                         | 2.90905e-28 | 1.000000 | 2.90905e-28 | 1.000000 |

|           |             |         |             |         |
|-----------|-------------|---------|-------------|---------|
| rad56     | 7.82969e-29 | 1.00000 | 7.82969e-29 | 1.00000 |
| rad40syn  | 3.04195e-30 | 1.00000 | 3.04195e-30 | 1.00000 |
| rad40anti | 2.47477e-30 | 1.00000 | 2.47477e-30 | 1.00000 |
| PAH8+H    | 1.11397e-31 | 1.00000 | 1.11397e-31 | 1.00000 |
| rad19syn  | 3.33334e-32 | 1.00000 | 3.33334e-32 | 1.00000 |
| rad73     | 2.65059e-32 | 1.00000 | 2.65059e-32 | 1.00000 |
| rad71     | 2.11231e-35 | 1.00000 | 2.11231e-35 | 1.00000 |
| rad8      | 3.11051e-43 | 1.00000 | 3.11051e-43 | 1.00000 |

10000.0000 Pa, 170.000000 K

=====

| Rate constant             | True (fraction)        | Effective (fraction)   |
|---------------------------|------------------------|------------------------|
| Total                     | 9.49598e-15 (1.00 )    | 9.49598e-15 (1.00 )    |
| Formation of rad19        | 9.49586e-15 (1.000 )   | 9.49586e-15 (1.000 )   |
| H-abstraction to cyc2enyl | 1.24279e-19 (1.31e-05) | 1.24279e-19 (1.31e-05) |
| H-abstraction to cyclenyl | 6.08025e-24 (6.40e-10) | 6.08025e-24 (6.40e-10) |

| species                       | PYtrue      | Cumul    | PYeffective | Cumul    |
|-------------------------------|-------------|----------|-------------|----------|
| rad9                          | 0.971800    | 0.971800 | 0.971800    | 0.971800 |
| Indene+H                      | 0.0258942   | 0.997694 | 0.0258942   | 0.997694 |
| rad15                         | 0.00228768  | 0.999982 | 0.00228768  | 0.999982 |
| Benzene+cycloprop-2-enylidene | 1.30875e-05 | 0.999995 | 1.30875e-05 | 0.999995 |
| PhCHCCH2+H                    | 4.11535e-06 | 0.999999 | 4.11535e-06 | 0.999999 |
| rad6                          | 1.66739e-07 | 0.999999 | 1.66739e-07 | 0.999999 |
| rad2                          | 1.52618e-07 | 1.000000 | 1.52618e-07 | 1.000000 |
| rad11                         | 2.81184e-08 | 1.000000 | 2.81184e-08 | 1.000000 |
| rad26                         | 2.49424e-08 | 1.000000 | 2.49424e-08 | 1.000000 |
| rad12                         | 1.76085e-08 | 1.000000 | 1.76085e-08 | 1.000000 |
| rad19anti                     | 1.74301e-08 | 1.000000 | 1.74301e-08 | 1.000000 |
| C2H2+PhCH2                    | 1.72345e-08 | 1.000000 | 1.72345e-08 | 1.000000 |
| rad23                         | 1.31424e-08 | 1.000000 | 1.31424e-08 | 1.000000 |
| rad22                         | 1.15032e-08 | 1.000000 | 1.15032e-08 | 1.000000 |
| rad1                          | 1.02628e-08 | 1.000000 | 1.02628e-08 | 1.000000 |
| rad10                         | 9.30521e-09 | 1.000000 | 9.30521e-09 | 1.000000 |
| rad67                         | 8.69428e-09 | 1.000000 | 8.69428e-09 | 1.000000 |
| rad45                         | 5.38555e-09 | 1.000000 | 5.38555e-09 | 1.000000 |
| rad35                         | 3.83658e-09 | 1.000000 | 3.83658e-09 | 1.000000 |
| rad3                          | 1.63744e-09 | 1.000000 | 1.63744e-09 | 1.000000 |
| PhCCCH3+H                     | 1.19322e-09 | 1.000000 | 1.19322e-09 | 1.000000 |
| PhCCH+CH3                     | 1.00421e-09 | 1.000000 | 1.00421e-09 | 1.000000 |
| rad4                          | 8.41637e-10 | 1.000000 | 8.41637e-10 | 1.000000 |
| Ph+MeAc                       | 8.24108e-10 | 1.000000 | 8.24108e-10 | 1.000000 |
| Benzene+cycloprop-1-enylidene | 6.40297e-10 | 1.000000 | 6.40297e-10 | 1.000000 |
| rad36                         | 3.32829e-10 | 1.000000 | 3.32829e-10 | 1.000000 |
| rad7                          | 1.71687e-10 | 1.000000 | 1.71687e-10 | 1.000000 |
| rad18                         | 1.67937e-10 | 1.000000 | 1.67937e-10 | 1.000000 |
| Ph+Allene                     | 1.58450e-10 | 1.000000 | 1.58450e-10 | 1.000000 |
| rad30                         | 6.49582e-11 | 1.000000 | 6.49582e-11 | 1.000000 |
| rad5                          | 3.10156e-11 | 1.000000 | 3.10156e-11 | 1.000000 |
| PhCH2CCH+H                    | 2.95561e-11 | 1.000000 | 2.95561e-11 | 1.000000 |
| rad20                         | 1.27992e-11 | 1.000000 | 1.27992e-11 | 1.000000 |
| rad21                         | 8.77253e-12 | 1.000000 | 8.77253e-12 | 1.000000 |
| PhcycC3H3_A+H                 | 7.53086e-12 | 1.000000 | 7.53086e-12 | 1.000000 |
| rad28                         | 1.43557e-12 | 1.000000 | 1.43557e-12 | 1.000000 |
| rad13                         | 1.38527e-12 | 1.000000 | 1.38527e-12 | 1.000000 |
| rad27                         | 1.18648e-12 | 1.000000 | 1.18648e-12 | 1.000000 |
| rad25                         | 8.87455e-13 | 1.000000 | 8.87455e-13 | 1.000000 |
| rad14                         | 7.30682e-13 | 1.000000 | 7.30682e-13 | 1.000000 |
| rad37                         | 6.77499e-13 | 1.000000 | 6.77499e-13 | 1.000000 |
| rad60syn                      | 2.95215e-13 | 1.000000 | 2.95215e-13 | 1.000000 |
| rad60anti                     | 1.45107e-13 | 1.000000 | 1.45107e-13 | 1.000000 |
| PAH3+H                        | 1.33052e-13 | 1.000000 | 1.33052e-13 | 1.000000 |
| PAH7+H                        | 1.00260e-13 | 1.000000 | 1.00260e-13 | 1.000000 |
| Phenyl+cycC3H4                | 5.71865e-14 | 1.000000 | 0.00000     | 1.000000 |
| rad38                         | 3.26353e-14 | 1.000000 | 3.26353e-14 | 1.000000 |
| PAH9+H                        | 3.09035e-14 | 1.000000 | 3.09035e-14 | 1.000000 |
| rad59                         | 2.69613e-14 | 1.000000 | 2.69613e-14 | 1.000000 |
| PhcycC3H3_B+H                 | 1.50835e-14 | 1.000000 | 1.50835e-14 | 1.000000 |
| rad46                         | 1.99781e-15 | 1.000000 | 1.99781e-15 | 1.000000 |
| rad33                         | 1.90686e-15 | 1.000000 | 1.90686e-15 | 1.000000 |
| PAH10+CH3                     | 1.11295e-15 | 1.000000 | 1.11295e-15 | 1.000000 |
| rad43                         | 1.74712e-16 | 1.000000 | 1.74712e-16 | 1.000000 |
| rad24                         | 1.73282e-16 | 1.000000 | 1.73282e-16 | 1.000000 |
| rad39                         | 9.02102e-17 | 1.000000 | 9.02102e-17 | 1.000000 |
| rad62                         | 1.42645e-17 | 1.000000 | 1.42645e-17 | 1.000000 |
| rad50                         | 1.36028e-17 | 1.000000 | 1.36028e-17 | 1.000000 |
| rad70                         | 9.81774e-18 | 1.000000 | 9.81774e-18 | 1.000000 |
| rad31                         | 4.24624e-18 | 1.000000 | 4.24624e-18 | 1.000000 |

|           |             |          |             |          |
|-----------|-------------|----------|-------------|----------|
| rad58     | 3.25982e-18 | 1.000000 | 3.25982e-18 | 1.000000 |
| rad54     | 7.17345e-19 | 1.000000 | 7.17345e-19 | 1.000000 |
| rad34     | 1.75929e-19 | 1.000000 | 1.75929e-19 | 1.000000 |
| PAH1+H    | 1.45194e-19 | 1.000000 | 1.45194e-19 | 1.000000 |
| rad52     | 9.94817e-20 | 1.000000 | 9.94817e-20 | 1.000000 |
| rad51     | 3.10613e-20 | 1.000000 | 3.10613e-20 | 1.000000 |
| rad41     | 1.51752e-20 | 1.000000 | 1.51752e-20 | 1.000000 |
| rad55     | 6.89090e-21 | 1.000000 | 6.89090e-21 | 1.000000 |
| rad42     | 4.06103e-21 | 1.000000 | 4.06103e-21 | 1.000000 |
| rad65     | 2.23209e-22 | 1.000000 | 2.23209e-22 | 1.000000 |
| rad47     | 8.90921e-25 | 1.000000 | 8.90921e-25 | 1.000000 |
| rad53     | 3.17176e-25 | 1.000000 | 3.17176e-25 | 1.000000 |
| rad61     | 3.04991e-25 | 1.000000 | 3.04991e-25 | 1.000000 |
| rad68syn  | 9.92465e-27 | 1.000000 | 9.92465e-27 | 1.000000 |
| rad68anti | 7.75876e-27 | 1.000000 | 7.75876e-27 | 1.000000 |
| rad64     | 1.04699e-27 | 1.000000 | 1.04699e-27 | 1.000000 |
| rad56     | 3.74628e-28 | 1.000000 | 3.74628e-28 | 1.000000 |
| rad40syn  | 2.36435e-29 | 1.000000 | 2.36435e-29 | 1.000000 |
| rad40anti | 1.93576e-29 | 1.000000 | 1.93576e-29 | 1.000000 |
| PAH8+H    | 1.21107e-30 | 1.000000 | 1.21107e-30 | 1.000000 |
| rad73     | 1.93317e-31 | 1.000000 | 1.93317e-31 | 1.000000 |
| rad19syn  | 9.14047e-32 | 1.000000 | 9.14047e-32 | 1.000000 |
| rad71     | 2.67618e-34 | 1.000000 | 2.67618e-34 | 1.000000 |
| rad8      | 3.07002e-43 | 1.000000 | 3.07002e-43 | 1.000000 |

10000.0000 Pa, 180.000000 K

| Rate constant             | True (fraction)        | Effective (fraction)   |
|---------------------------|------------------------|------------------------|
| Total                     | 1.12884e-14 (1.00 )    | 1.12884e-14 (1.00 )    |
| Formation of rad19        | 1.12881e-14 (1.000 )   | 1.12881e-14 (1.000 )   |
| H-abstraction to cyc2enyl | 2.75916e-19 (2.44e-05) | 2.75916e-19 (2.44e-05) |
| H-abstraction to cyclenyl | 2.39955e-23 (2.13e-09) | 2.39955e-23 (2.13e-09) |

| species                       | PYtrue      | Cumul    | PYeffective | Cumul    |
|-------------------------------|-------------|----------|-------------|----------|
| rad9                          | 0.969735    | 0.969735 | 0.969735    | 0.969735 |
| Indene+H                      | 0.0279736   | 0.997709 | 0.0279736   | 0.997709 |
| rad15                         | 0.00226150  | 0.999970 | 0.00226150  | 0.999970 |
| Benzene+cycloprop-2-enylidene | 2.44424e-05 | 0.999995 | 2.44424e-05 | 0.999995 |
| PhCHCCH2+H                    | 4.64432e-06 | 1.000000 | 4.64432e-06 | 1.000000 |
| rad6                          | 1.92205e-07 | 1.000000 | 1.92205e-07 | 1.000000 |
| rad2                          | 1.71695e-07 | 1.000000 | 1.71695e-07 | 1.000000 |
| rad26                         | 2.82325e-08 | 1.000000 | 2.82325e-08 | 1.000000 |
| rad11                         | 2.79175e-08 | 1.000000 | 2.79175e-08 | 1.000000 |
| C2H2+PhCH2                    | 1.99632e-08 | 1.000000 | 1.99632e-08 | 1.000000 |
| rad12                         | 1.72226e-08 | 1.000000 | 1.72226e-08 | 1.000000 |
| rad19anti                     | 1.69948e-08 | 1.000000 | 1.69948e-08 | 1.000000 |
| rad23                         | 1.52406e-08 | 1.000000 | 1.52406e-08 | 1.000000 |
| rad1                          | 1.16123e-08 | 1.000000 | 1.16123e-08 | 1.000000 |
| rad22                         | 1.15701e-08 | 1.000000 | 1.15701e-08 | 1.000000 |
| rad10                         | 1.11691e-08 | 1.000000 | 1.11691e-08 | 1.000000 |
| rad67                         | 1.00274e-08 | 1.000000 | 1.00274e-08 | 1.000000 |
| rad45                         | 5.94719e-09 | 1.000000 | 5.94719e-09 | 1.000000 |
| rad35                         | 4.41283e-09 | 1.000000 | 4.41283e-09 | 1.000000 |
| Benzene+cycloprop-1-enylidene | 2.12567e-09 | 1.000000 | 2.12567e-09 | 1.000000 |
| rad3                          | 1.90502e-09 | 1.000000 | 1.90502e-09 | 1.000000 |
| PhCCCH3+H                     | 1.53713e-09 | 1.000000 | 1.53713e-09 | 1.000000 |
| PhCCH+CH3                     | 1.35227e-09 | 1.000000 | 1.35227e-09 | 1.000000 |
| Ph+MeAc                       | 1.08120e-09 | 1.000000 | 1.08120e-09 | 1.000000 |
| rad4                          | 9.80615e-10 | 1.000000 | 9.80615e-10 | 1.000000 |
| rad36                         | 3.68258e-10 | 1.000000 | 3.68258e-10 | 1.000000 |
| rad7                          | 1.99464e-10 | 1.000000 | 1.99464e-10 | 1.000000 |
| Ph+Allene                     | 1.95776e-10 | 1.000000 | 1.95776e-10 | 1.000000 |
| rad18                         | 1.54474e-10 | 1.000000 | 1.54474e-10 | 1.000000 |
| rad30                         | 7.50157e-11 | 1.000000 | 7.50157e-11 | 1.000000 |
| PhCH2CCH+H                    | 3.73412e-11 | 1.000000 | 3.73412e-11 | 1.000000 |
| rad5                          | 3.57529e-11 | 1.000000 | 3.57529e-11 | 1.000000 |
| rad20                         | 1.19527e-11 | 1.000000 | 1.19527e-11 | 1.000000 |
| PhcycC3H3_A+H                 | 9.82295e-12 | 1.000000 | 9.82295e-12 | 1.000000 |
| rad21                         | 8.18588e-12 | 1.000000 | 8.18588e-12 | 1.000000 |
| rad28                         | 1.92058e-12 | 1.000000 | 1.92058e-12 | 1.000000 |
| rad13                         | 1.55869e-12 | 1.000000 | 1.55869e-12 | 1.000000 |
| rad27                         | 1.30709e-12 | 1.000000 | 1.30709e-12 | 1.000000 |
| rad37                         | 8.97741e-13 | 1.000000 | 8.97741e-13 | 1.000000 |
| rad25                         | 8.68558e-13 | 1.000000 | 8.68558e-13 | 1.000000 |
| rad14                         | 8.46991e-13 | 1.000000 | 8.46991e-13 | 1.000000 |
| rad60syn                      | 3.50707e-13 | 1.000000 | 3.50707e-13 | 1.000000 |
| rad60anti                     | 1.72821e-13 | 1.000000 | 1.72821e-13 | 1.000000 |
| PAH3+H                        | 1.63815e-13 | 1.000000 | 1.63815e-13 | 1.000000 |

|                |             |         |             |         |
|----------------|-------------|---------|-------------|---------|
| PAH7+H         | 1.27480e-13 | 1.00000 | 1.27480e-13 | 1.00000 |
| Phenyl+cycC3H4 | 8.44531e-14 | 1.00000 | 0.00000     | 1.00000 |
| rad38          | 4.24473e-14 | 1.00000 | 4.24473e-14 | 1.00000 |
| PAH9+H         | 4.22963e-14 | 1.00000 | 4.22963e-14 | 1.00000 |
| rad59          | 3.30107e-14 | 1.00000 | 3.30107e-14 | 1.00000 |
| PhcycC3H3_B+H  | 2.77704e-14 | 1.00000 | 2.77704e-14 | 1.00000 |
| rad46          | 2.63204e-15 | 1.00000 | 2.63204e-15 | 1.00000 |
| rad33          | 2.13575e-15 | 1.00000 | 2.13575e-15 | 1.00000 |
| PAH10+CH3      | 1.65484e-15 | 1.00000 | 1.65484e-15 | 1.00000 |
| rad43          | 2.57711e-16 | 1.00000 | 2.57711e-16 | 1.00000 |
| rad24          | 1.87301e-16 | 1.00000 | 1.87301e-16 | 1.00000 |
| rad39          | 1.46513e-16 | 1.00000 | 1.46513e-16 | 1.00000 |
| rad62          | 2.28922e-17 | 1.00000 | 2.28922e-17 | 1.00000 |
| rad50          | 1.91269e-17 | 1.00000 | 1.91269e-17 | 1.00000 |
| rad70          | 1.43276e-17 | 1.00000 | 1.43276e-17 | 1.00000 |
| rad31          | 5.03840e-18 | 1.00000 | 5.03840e-18 | 1.00000 |
| rad58          | 4.56023e-18 | 1.00000 | 4.56023e-18 | 1.00000 |
| rad54          | 1.13725e-18 | 1.00000 | 1.13725e-18 | 1.00000 |
| rad34          | 2.78940e-19 | 1.00000 | 2.78940e-19 | 1.00000 |
| PAH1+H         | 2.52597e-19 | 1.00000 | 2.52597e-19 | 1.00000 |
| rad52          | 1.46785e-19 | 1.00000 | 1.46785e-19 | 1.00000 |
| rad51          | 4.84518e-20 | 1.00000 | 4.84518e-20 | 1.00000 |
| rad41          | 2.82452e-20 | 1.00000 | 2.82452e-20 | 1.00000 |
| rad55          | 1.17098e-20 | 1.00000 | 1.17098e-20 | 1.00000 |
| rad42          | 7.96399e-21 | 1.00000 | 7.96399e-21 | 1.00000 |
| rad65          | 3.85421e-22 | 1.00000 | 3.85421e-22 | 1.00000 |
| rad61          | 1.11085e-24 | 1.00000 | 1.11085e-24 | 1.00000 |
| rad47          | 1.06080e-24 | 1.00000 | 1.06080e-24 | 1.00000 |
| rad53          | 8.31912e-25 | 1.00000 | 8.31912e-25 | 1.00000 |
| rad68syn       | 4.00216e-26 | 1.00000 | 4.00216e-26 | 1.00000 |
| rad68anti      | 3.10616e-26 | 1.00000 | 3.10616e-26 | 1.00000 |
| rad64          | 3.65223e-27 | 1.00000 | 3.65223e-27 | 1.00000 |
| rad56          | 1.62845e-27 | 1.00000 | 1.62845e-27 | 1.00000 |
| rad40syn       | 1.55282e-28 | 1.00000 | 1.55282e-28 | 1.00000 |
| rad40anti      | 1.27920e-28 | 1.00000 | 1.27920e-28 | 1.00000 |
| PAH8+H         | 1.06982e-29 | 1.00000 | 1.06982e-29 | 1.00000 |
| rad73          | 1.21773e-30 | 1.00000 | 1.21773e-30 | 1.00000 |
| rad19syn       | 2.63862e-31 | 1.00000 | 2.63862e-31 | 1.00000 |
| rad71          | 2.72514e-33 | 1.00000 | 2.72514e-33 | 1.00000 |
| rad8           | 3.19030e-43 | 1.00000 | 3.19030e-43 | 1.00000 |

10000.0000 Pa, 190.000000 K

| Rate constant             | True (fraction)        | Effective (fraction)   |
|---------------------------|------------------------|------------------------|
| Total                     | 1.32132e-14 (1.00 )    | 1.32132e-14 (1.00 )    |
| Formation of rad19        | 1.32126e-14 (1.000 )   | 1.32126e-14 (1.000 )   |
| H-abstraction to cyc2enyl | 5.62053e-19 (4.25e-05) | 5.62053e-19 (4.25e-05) |
| H-abstraction to cyclenyl | 8.18073e-23 (6.19e-09) | 8.18073e-23 (6.19e-09) |

| species                       | PYtrue      | Cumul    | PYeffective | Cumul    |
|-------------------------------|-------------|----------|-------------|----------|
| rad9                          | 0.967549    | 0.967549 | 0.967549    | 0.967549 |
| Indene+H                      | 0.0301664   | 0.997715 | 0.0301664   | 0.997715 |
| rad15                         | 0.00223670  | 0.999952 | 0.00223670  | 0.999952 |
| Benzene+cycloprop-2-enylidene | 4.25373e-05 | 0.999994 | 4.25373e-05 | 0.999994 |
| PhCHCCH2+H                    | 5.24636e-06 | 1.000000 | 5.24636e-06 | 1.000000 |
| rad6                          | 2.21341e-07 | 1.000000 | 2.21341e-07 | 1.000000 |
| rad2                          | 1.93243e-07 | 1.000000 | 1.93243e-07 | 1.000000 |
| rad26                         | 3.19914e-08 | 1.000000 | 3.19914e-08 | 1.000000 |
| rad11                         | 2.76589e-08 | 1.000000 | 2.76589e-08 | 1.000000 |
| C2H2+PhCH2                    | 2.31520e-08 | 1.000000 | 2.31520e-08 | 1.000000 |
| rad23                         | 1.76274e-08 | 1.000000 | 1.76274e-08 | 1.000000 |
| rad12                         | 1.68831e-08 | 1.000000 | 1.68831e-08 | 1.000000 |
| rad19anti                     | 1.66291e-08 | 1.000000 | 1.66291e-08 | 1.000000 |
| rad10                         | 1.33791e-08 | 1.000000 | 1.33791e-08 | 1.000000 |
| rad1                          | 1.31536e-08 | 1.000000 | 1.31536e-08 | 1.000000 |
| rad22                         | 1.16029e-08 | 1.000000 | 1.16029e-08 | 1.000000 |
| rad67                         | 1.15839e-08 | 1.000000 | 1.15839e-08 | 1.000000 |
| rad45                         | 6.57399e-09 | 1.000000 | 6.57399e-09 | 1.000000 |
| Benzene+cycloprop-1-enylidene | 6.19133e-09 | 1.000000 | 6.19133e-09 | 1.000000 |
| rad35                         | 5.08325e-09 | 1.000000 | 5.08325e-09 | 1.000000 |
| rad3                          | 2.21009e-09 | 1.000000 | 2.21009e-09 | 1.000000 |
| PhCCCH3+H                     | 1.98700e-09 | 1.000000 | 1.98700e-09 | 1.000000 |
| PhCCH+CH3                     | 1.81987e-09 | 1.000000 | 1.81987e-09 | 1.000000 |
| Ph+MeAc                       | 1.42497e-09 | 1.000000 | 1.42497e-09 | 1.000000 |
| rad4                          | 1.13954e-09 | 1.000000 | 1.13954e-09 | 1.000000 |
| rad36                         | 4.08018e-10 | 1.000000 | 4.08018e-10 | 1.000000 |
| Ph+Allene                     | 2.42423e-10 | 1.000000 | 2.42423e-10 | 1.000000 |
| rad7                          | 2.31321e-10 | 1.000000 | 2.31321e-10 | 1.000000 |

|                |             |         |             |         |
|----------------|-------------|---------|-------------|---------|
| rad18          | 1.42768e-10 | 1.00000 | 1.42768e-10 | 1.00000 |
| rad30          | 8.67586e-11 | 1.00000 | 8.67586e-11 | 1.00000 |
| PhCH2CCH+H     | 4.73356e-11 | 1.00000 | 4.73356e-11 | 1.00000 |
| rad5           | 4.11867e-11 | 1.00000 | 4.11867e-11 | 1.00000 |
| PhcycC3H3_A+H  | 1.28885e-11 | 1.00000 | 1.28885e-11 | 1.00000 |
| rad20          | 1.11958e-11 | 1.00000 | 1.11958e-11 | 1.00000 |
| rad21          | 7.66157e-12 | 1.00000 | 7.66157e-12 | 1.00000 |
| rad28          | 2.57398e-12 | 1.00000 | 2.57398e-12 | 1.00000 |
| rad13          | 1.75473e-12 | 1.00000 | 1.75473e-12 | 1.00000 |
| rad27          | 1.44277e-12 | 1.00000 | 1.44277e-12 | 1.00000 |
| rad37          | 1.19671e-12 | 1.00000 | 1.19671e-12 | 1.00000 |
| rad14          | 9.78754e-13 | 1.00000 | 9.78754e-13 | 1.00000 |
| rad25          | 8.49096e-13 | 1.00000 | 8.49096e-13 | 1.00000 |
| rad60syn       | 4.17902e-13 | 1.00000 | 4.17902e-13 | 1.00000 |
| rad60anti      | 2.06484e-13 | 1.00000 | 2.06484e-13 | 1.00000 |
| PAH3+H         | 2.02722e-13 | 1.00000 | 2.02722e-13 | 1.00000 |
| PAH7+H         | 1.62632e-13 | 1.00000 | 1.62632e-13 | 1.00000 |
| Phenyl+cycC3H4 | 1.24598e-13 | 1.00000 | 0.00000     | 1.00000 |
| PAH9+H         | 5.79496e-14 | 1.00000 | 5.79496e-14 | 1.00000 |
| rad38          | 5.54363e-14 | 1.00000 | 5.54363e-14 | 1.00000 |
| PhcycC3H3_B+H  | 4.96720e-14 | 1.00000 | 4.96720e-14 | 1.00000 |
| rad59          | 4.06087e-14 | 1.00000 | 4.06087e-14 | 1.00000 |
| rad46          | 3.48264e-15 | 1.00000 | 3.48264e-15 | 1.00000 |
| PAH10+CH3      | 2.49227e-15 | 1.00000 | 2.49227e-15 | 1.00000 |
| rad33          | 2.39495e-15 | 1.00000 | 2.39495e-15 | 1.00000 |
| rad43          | 3.83975e-16 | 1.00000 | 3.83975e-16 | 1.00000 |
| rad39          | 2.40276e-16 | 1.00000 | 2.40276e-16 | 1.00000 |
| rad24          | 2.03099e-16 | 1.00000 | 2.03099e-16 | 1.00000 |
| rad62          | 3.68537e-17 | 1.00000 | 3.68537e-17 | 1.00000 |
| rad50          | 2.71221e-17 | 1.00000 | 2.71221e-17 | 1.00000 |
| rad70          | 2.10654e-17 | 1.00000 | 2.10654e-17 | 1.00000 |
| rad58          | 6.44169e-18 | 1.00000 | 6.44169e-18 | 1.00000 |
| rad31          | 6.00627e-18 | 1.00000 | 6.00627e-18 | 1.00000 |
| rad54          | 1.82292e-18 | 1.00000 | 1.82292e-18 | 1.00000 |
| PAH1+H         | 4.45754e-19 | 1.00000 | 4.45754e-19 | 1.00000 |
| rad34          | 4.45390e-19 | 1.00000 | 4.45390e-19 | 1.00000 |
| rad52          | 2.18967e-19 | 1.00000 | 2.18967e-19 | 1.00000 |
| rad51          | 7.65748e-20 | 1.00000 | 7.65748e-20 | 1.00000 |
| rad41          | 5.29227e-20 | 1.00000 | 5.29227e-20 | 1.00000 |
| rad55          | 2.01385e-20 | 1.00000 | 2.01385e-20 | 1.00000 |
| rad42          | 1.55791e-20 | 1.00000 | 1.55791e-20 | 1.00000 |
| rad65          | 6.72945e-22 | 1.00000 | 6.72945e-22 | 1.00000 |
| rad61          | 3.78369e-24 | 1.00000 | 3.78369e-24 | 1.00000 |
| rad53          | 2.14173e-24 | 1.00000 | 2.14173e-24 | 1.00000 |
| rad47          | 1.27004e-24 | 1.00000 | 1.27004e-24 | 1.00000 |
| rad68syn       | 1.46300e-25 | 1.00000 | 1.46300e-25 | 1.00000 |
| rad68anti      | 1.12695e-25 | 1.00000 | 1.12695e-25 | 1.00000 |
| rad64          | 1.23758e-26 | 1.00000 | 1.23758e-26 | 1.00000 |
| rad56          | 6.52046e-27 | 1.00000 | 6.52046e-27 | 1.00000 |
| rad40syn       | 8.81317e-28 | 1.00000 | 8.81317e-28 | 1.00000 |
| rad40anti      | 7.30295e-28 | 1.00000 | 7.30295e-28 | 1.00000 |
| PAH8+H         | 7.87866e-29 | 1.00000 | 7.87866e-29 | 1.00000 |
| rad73          | 6.75608e-30 | 1.00000 | 6.75608e-30 | 1.00000 |
| rad19syn       | 8.01975e-31 | 1.00000 | 8.01975e-31 | 1.00000 |
| rad71          | 2.28897e-32 | 1.00000 | 2.28897e-32 | 1.00000 |
| rad8           | 3.47403e-43 | 1.00000 | 3.47403e-43 | 1.00000 |

10000.0000 Pa, 200.000000 K

| Rate constant             | True (fraction)        | Effective (fraction)   |
|---------------------------|------------------------|------------------------|
| Total                     | 1.52621e-14 (1.00 )    | 1.52621e-14 (1.00 )    |
| Formation of rad19        | 1.52610e-14 (1.000 )   | 1.52610e-14 (1.000 )   |
| H-abstraction to cyc2enyl | 1.06427e-18 (6.97e-05) | 1.06427e-18 (6.97e-05) |
| H-abstraction to cyc1enyl | 2.46309e-22 (1.61e-08) | 2.46309e-22 (1.61e-08) |

| species                       | PYtrue      | Cumul    | PYeffective | Cumul    |
|-------------------------------|-------------|----------|-------------|----------|
| rad9                          | 0.965224    | 0.965224 | 0.965224    | 0.965224 |
| Indene+H                      | 0.0324870   | 0.997711 | 0.0324870   | 0.997711 |
| rad15                         | 0.00221305  | 0.999924 | 0.00221305  | 0.999924 |
| Benzene+cycloprop-2-enylidene | 6.97330e-05 | 0.999993 | 6.97330e-05 | 0.999993 |
| PhCHCCH2+H                    | 5.93527e-06 | 0.999999 | 5.93527e-06 | 0.999999 |
| rad6                          | 2.54838e-07 | 1.000000 | 2.54838e-07 | 1.000000 |
| rad2                          | 2.17678e-07 | 1.000000 | 2.17678e-07 | 1.000000 |
| rad26                         | 3.63086e-08 | 1.000000 | 3.63086e-08 | 1.000000 |
| rad11                         | 2.73507e-08 | 1.000000 | 2.73507e-08 | 1.000000 |
| C2H2+PhCH2                    | 2.69001e-08 | 1.000000 | 2.69001e-08 | 1.000000 |
| rad23                         | 2.03507e-08 | 1.000000 | 2.03507e-08 | 1.000000 |
| rad12                         | 1.65839e-08 | 1.000000 | 1.65839e-08 | 1.000000 |



|                               |             |         |             |         |
|-------------------------------|-------------|---------|-------------|---------|
| rad19anti                     | 1.63270e-08 | 1.00000 | 1.63270e-08 | 1.00000 |
| Benzene+cycloprop-1-enylidene | 1.61386e-08 | 1.00000 | 1.61386e-08 | 1.00000 |
| rad10                         | 1.60021e-08 | 1.00000 | 1.60021e-08 | 1.00000 |
| rad1                          | 1.49220e-08 | 1.00000 | 1.49220e-08 | 1.00000 |
| rad67                         | 1.34118e-08 | 1.00000 | 1.34118e-08 | 1.00000 |
| rad22                         | 1.16047e-08 | 1.00000 | 1.16047e-08 | 1.00000 |
| rad45                         | 7.27781e-09 | 1.00000 | 7.27781e-09 | 1.00000 |
| rad35                         | 5.86772e-09 | 1.00000 | 5.86772e-09 | 1.00000 |
| PhCCCH3+H                     | 2.57950e-09 | 1.00000 | 2.57950e-09 | 1.00000 |
| rad3                          | 2.55838e-09 | 1.00000 | 2.55838e-09 | 1.00000 |
| PhCCH+CH3                     | 2.44970e-09 | 1.00000 | 2.44970e-09 | 1.00000 |
| Ph+MeAc                       | 1.88801e-09 | 1.00000 | 1.88801e-09 | 1.00000 |
| rad4                          | 1.32158e-09 | 1.00000 | 1.32158e-09 | 1.00000 |
| rad36                         | 4.52932e-10 | 1.00000 | 4.52932e-10 | 1.00000 |
| Ph+Allene                     | 3.01073e-10 | 1.00000 | 3.01073e-10 | 1.00000 |
| rad7                          | 2.67958e-10 | 1.00000 | 2.67958e-10 | 1.00000 |
| rad18                         | 1.32503e-10 | 1.00000 | 1.32503e-10 | 1.00000 |
| rad30                         | 1.00553e-10 | 1.00000 | 1.00553e-10 | 1.00000 |
| PhCH2CCH+H                    | 6.02515e-11 | 1.00000 | 6.02515e-11 | 1.00000 |
| rad5                          | 4.74066e-11 | 1.00000 | 4.74066e-11 | 1.00000 |
| PhcycC3H3_A+H                 | 1.69983e-11 | 1.00000 | 1.69983e-11 | 1.00000 |
| rad20                         | 1.05139e-11 | 1.00000 | 1.05139e-11 | 1.00000 |
| rad21                         | 7.18947e-12 | 1.00000 | 7.18947e-12 | 1.00000 |
| rad28                         | 3.45935e-12 | 1.00000 | 3.45935e-12 | 1.00000 |
| rad13                         | 1.97756e-12 | 1.00000 | 1.97756e-12 | 1.00000 |
| rad37                         | 1.60638e-12 | 1.00000 | 1.60638e-12 | 1.00000 |
| rad27                         | 1.59600e-12 | 1.00000 | 1.59600e-12 | 1.00000 |
| rad14                         | 1.12827e-12 | 1.00000 | 1.12827e-12 | 1.00000 |
| rad25                         | 8.29232e-13 | 1.00000 | 8.29232e-13 | 1.00000 |
| rad60syn                      | 4.99838e-13 | 1.00000 | 4.99838e-13 | 1.00000 |
| PAH3+H                        | 2.52332e-13 | 1.00000 | 2.52332e-13 | 1.00000 |
| rad60anti                     | 2.47665e-13 | 1.00000 | 2.47665e-13 | 1.00000 |
| PAH7+H                        | 2.08358e-13 | 1.00000 | 2.08358e-13 | 1.00000 |
| Phenyl+cycC3H4                | 1.83620e-13 | 1.00000 | 0.00000     | 1.00000 |
| PhcycC3H3_B+H                 | 8.66947e-14 | 1.00000 | 8.66947e-14 | 1.00000 |
| PAH9+H                        | 7.95867e-14 | 1.00000 | 7.95867e-14 | 1.00000 |
| rad38                         | 7.27936e-14 | 1.00000 | 7.27936e-14 | 1.00000 |
| rad59                         | 5.02270e-14 | 1.00000 | 5.02270e-14 | 1.00000 |
| rad46                         | 4.63371e-15 | 1.00000 | 4.63371e-15 | 1.00000 |
| PAH10+CH3                     | 3.80291e-15 | 1.00000 | 3.80291e-15 | 1.00000 |
| rad33                         | 2.69022e-15 | 1.00000 | 2.69022e-15 | 1.00000 |
| rad43                         | 5.77921e-16 | 1.00000 | 5.77921e-16 | 1.00000 |
| rad39                         | 3.98217e-16 | 1.00000 | 3.98217e-16 | 1.00000 |
| rad24                         | 2.20992e-16 | 1.00000 | 2.20992e-16 | 1.00000 |
| rad62                         | 5.95022e-17 | 1.00000 | 5.95022e-17 | 1.00000 |
| rad50                         | 3.88266e-17 | 1.00000 | 3.88266e-17 | 1.00000 |
| rad70                         | 3.12006e-17 | 1.00000 | 3.12006e-17 | 1.00000 |
| rad58                         | 9.18797e-18 | 1.00000 | 9.18797e-18 | 1.00000 |
| rad31                         | 7.19916e-18 | 1.00000 | 7.19916e-18 | 1.00000 |
| rad54                         | 2.95493e-18 | 1.00000 | 2.95493e-18 | 1.00000 |
| PAH1+H                        | 7.96693e-19 | 1.00000 | 7.96693e-19 | 1.00000 |
| rad34                         | 7.15637e-19 | 1.00000 | 7.15637e-19 | 1.00000 |
| rad52                         | 3.30490e-19 | 1.00000 | 3.30490e-19 | 1.00000 |
| rad51                         | 1.22648e-19 | 1.00000 | 1.22648e-19 | 1.00000 |
| rad41                         | 9.96419e-20 | 1.00000 | 9.96419e-20 | 1.00000 |
| rad55                         | 3.50302e-20 | 1.00000 | 3.50302e-20 | 1.00000 |
| rad42                         | 3.03562e-20 | 1.00000 | 3.03562e-20 | 1.00000 |
| rad65                         | 1.18761e-21 | 1.00000 | 1.18761e-21 | 1.00000 |
| rad61                         | 1.21661e-23 | 1.00000 | 1.21661e-23 | 1.00000 |
| rad53                         | 5.41921e-24 | 1.00000 | 5.41921e-24 | 1.00000 |
| rad47                         | 1.53084e-24 | 1.00000 | 1.53084e-24 | 1.00000 |
| rad68syn                      | 4.91908e-25 | 1.00000 | 4.91908e-25 | 1.00000 |
| rad68anti                     | 3.76044e-25 | 1.00000 | 3.76044e-25 | 1.00000 |
| rad64                         | 4.07897e-26 | 1.00000 | 4.07897e-26 | 1.00000 |
| rad56                         | 2.43164e-26 | 1.00000 | 2.43164e-26 | 1.00000 |
| rad40syn                      | 4.40379e-27 | 1.00000 | 4.40379e-27 | 1.00000 |
| rad40anti                     | 3.66950e-27 | 1.00000 | 3.66950e-27 | 1.00000 |
| PAH8+H                        | 4.94118e-28 | 1.00000 | 4.94118e-28 | 1.00000 |
| rad73                         | 3.35393e-29 | 1.00000 | 3.35393e-29 | 1.00000 |
| rad19syn                      | 2.56581e-30 | 1.00000 | 2.56581e-30 | 1.00000 |
| rad71                         | 1.61933e-31 | 1.00000 | 1.61933e-31 | 1.00000 |
| rad8                          | 3.94958e-43 | 1.00000 | 3.94958e-43 | 1.00000 |

10000.0000 Pa, 210.000000 K

| Rate constant             | True (fraction)        | Effective (fraction)   |
|---------------------------|------------------------|------------------------|
| Total                     | 1.74272e-14 (1.00 )    | 1.74272e-14 (1.00 )    |
| Formation of rad19        | 1.74253e-14 (1.000 )   | 1.74253e-14 (1.000 )   |
| H-abstraction to cyc2enyl | 1.89310e-18 (0.000109) | 1.89310e-18 (0.000109) |

H-abstraction to cyclenyl | 6.66714e-22 (3.83e-08) 6.66714e-22 (3.83e-08)

| species                       | PYtrue      | Cumul    | PYeffective | Cumul    |
|-------------------------------|-------------|----------|-------------|----------|
| rad9                          | 0.962742    | 0.962742 | 0.962742    | 0.962742 |
| Indene+H                      | 0.0349513   | 0.997694 | 0.0349513   | 0.997694 |
| rad15                         | 0.00219032  | 0.999884 | 0.00219032  | 0.999884 |
| Benzene+cycloprop-2-enylidene | 0.000108629 | 0.999993 | 0.000108629 | 0.999993 |
| PhCHCCH2+H                    | 6.72748e-06 | 0.999999 | 6.72748e-06 | 0.999999 |
| rad6                          | 2.93528e-07 | 1.000000 | 2.93528e-07 | 1.000000 |
| rad2                          | 2.45471e-07 | 1.000000 | 2.45471e-07 | 1.000000 |
| rad26                         | 4.12908e-08 | 1.000000 | 4.12908e-08 | 1.000000 |
| Benzene+cycloprop-1-enylidene | 3.82571e-08 | 1.000000 | 3.82571e-08 | 1.000000 |
| C2H2+PhCH2                    | 3.13297e-08 | 1.000000 | 3.13297e-08 | 1.000000 |
| rad11                         | 2.69999e-08 | 1.000000 | 2.69999e-08 | 1.000000 |
| rad23                         | 2.34669e-08 | 1.000000 | 2.34669e-08 | 1.000000 |
| rad10                         | 1.91154e-08 | 1.000000 | 1.91154e-08 | 1.000000 |
| rad1                          | 1.69587e-08 | 1.000000 | 1.69587e-08 | 1.000000 |
| rad12                         | 1.63204e-08 | 1.000000 | 1.63204e-08 | 1.000000 |
| rad19anti                     | 1.60843e-08 | 1.000000 | 1.60843e-08 | 1.000000 |
| rad67                         | 1.55699e-08 | 1.000000 | 1.55699e-08 | 1.000000 |
| rad22                         | 1.15780e-08 | 1.000000 | 1.15780e-08 | 1.000000 |
| rad45                         | 8.07236e-09 | 1.000000 | 8.07236e-09 | 1.000000 |
| rad35                         | 6.79048e-09 | 1.000000 | 6.79048e-09 | 1.000000 |
| PhCCCH3+H                     | 3.36471e-09 | 1.000000 | 3.36471e-09 | 1.000000 |
| PhCCH+CH3                     | 3.29980e-09 | 1.000000 | 3.29980e-09 | 1.000000 |
| rad3                          | 2.95642e-09 | 1.000000 | 2.95642e-09 | 1.000000 |
| Ph+MeAc                       | 2.51591e-09 | 1.000000 | 2.51591e-09 | 1.000000 |
| rad4                          | 1.53037e-09 | 1.000000 | 1.53037e-09 | 1.000000 |
| rad36                         | 5.03968e-10 | 1.000000 | 5.03968e-10 | 1.000000 |
| Ph+Allene                     | 3.75239e-10 | 1.000000 | 3.75239e-10 | 1.000000 |
| rad7                          | 3.10215e-10 | 1.000000 | 3.10215e-10 | 1.000000 |
| rad18                         | 1.23432e-10 | 1.000000 | 1.23432e-10 | 1.000000 |
| rad30                         | 1.16848e-10 | 1.000000 | 1.16848e-10 | 1.000000 |
| PhCH2CCH+H                    | 7.70451e-11 | 1.000000 | 7.70451e-11 | 1.000000 |
| rad5                          | 5.45014e-11 | 1.000000 | 5.45014e-11 | 1.000000 |
| PhcycC3H3_A+H                 | 2.25170e-11 | 1.000000 | 2.25170e-11 | 1.000000 |
| rad20                         | 9.89551e-12 | 1.000000 | 9.89551e-12 | 1.000000 |
| rad21                         | 6.76162e-12 | 1.000000 | 6.76162e-12 | 1.000000 |
| rad28                         | 4.66577e-12 | 1.000000 | 4.66577e-12 | 1.000000 |
| rad13                         | 2.23216e-12 | 1.000000 | 2.23216e-12 | 1.000000 |
| rad37                         | 2.17281e-12 | 1.000000 | 2.17281e-12 | 1.000000 |
| rad27                         | 1.76957e-12 | 1.000000 | 1.76957e-12 | 1.000000 |
| rad14                         | 1.29816e-12 | 1.000000 | 1.29816e-12 | 1.000000 |
| rad25                         | 8.09100e-13 | 1.000000 | 8.09100e-13 | 1.000000 |
| rad60syn                      | 6.00403e-13 | 1.000000 | 6.00403e-13 | 1.000000 |
| PAH3+H                        | 3.16069e-13 | 1.000000 | 3.16069e-13 | 1.000000 |
| rad60anti                     | 2.98375e-13 | 1.000000 | 2.98375e-13 | 1.000000 |
| Phenyl+cycC3H4                | 2.70219e-13 | 1.000000 | 0.000000    | 1.000000 |
| PAH7+H                        | 2.68267e-13 | 1.000000 | 2.68267e-13 | 1.000000 |
| PhcycC3H3_B+H                 | 1.48143e-13 | 1.000000 | 1.48143e-13 | 1.000000 |
| PAH9+H                        | 1.09675e-13 | 1.000000 | 1.09675e-13 | 1.000000 |
| rad38                         | 9.62063e-14 | 1.000000 | 9.62063e-14 | 1.000000 |
| rad59                         | 6.24922e-14 | 1.000000 | 6.24922e-14 | 1.000000 |
| rad46                         | 6.20502e-15 | 1.000000 | 6.20502e-15 | 1.000000 |
| PAH10+CH3                     | 5.87795e-15 | 1.000000 | 5.87795e-15 | 1.000000 |
| rad33                         | 3.02845e-15 | 1.000000 | 3.02845e-15 | 1.000000 |
| rad43                         | 8.78291e-16 | 1.000000 | 8.78291e-16 | 1.000000 |
| rad39                         | 6.67110e-16 | 1.000000 | 6.67110e-16 | 1.000000 |
| rad24                         | 2.41344e-16 | 1.000000 | 2.41344e-16 | 1.000000 |
| rad62                         | 9.62863e-17 | 1.000000 | 9.62863e-17 | 1.000000 |
| rad50                         | 5.61492e-17 | 1.000000 | 5.61492e-17 | 1.000000 |
| rad70                         | 4.65346e-17 | 1.000000 | 4.65346e-17 | 1.000000 |
| rad58                         | 1.32278e-17 | 1.000000 | 1.32278e-17 | 1.000000 |
| rad31                         | 8.68215e-18 | 1.000000 | 8.68215e-18 | 1.000000 |
| rad54                         | 4.84232e-18 | 1.000000 | 4.84232e-18 | 1.000000 |
| PAH1+H                        | 1.43944e-18 | 1.000000 | 1.43944e-18 | 1.000000 |
| rad34                         | 1.15593e-18 | 1.000000 | 1.15593e-18 | 1.000000 |
| rad52                         | 5.04828e-19 | 1.000000 | 5.04828e-19 | 1.000000 |
| rad51                         | 1.99028e-19 | 1.000000 | 1.99028e-19 | 1.000000 |
| rad41                         | 1.88136e-19 | 1.000000 | 1.88136e-19 | 1.000000 |
| rad55                         | 6.15637e-20 | 1.000000 | 6.15637e-20 | 1.000000 |
| rad42                         | 5.88291e-20 | 1.000000 | 5.88291e-20 | 1.000000 |
| rad65                         | 2.11645e-21 | 1.000000 | 2.11645e-21 | 1.000000 |
| rad61                         | 3.71960e-23 | 1.000000 | 3.71960e-23 | 1.000000 |
| rad53                         | 1.34874e-23 | 1.000000 | 1.34874e-23 | 1.000000 |
| rad47                         | 1.85996e-24 | 1.000000 | 1.85996e-24 | 1.000000 |
| rad68syn                      | 1.53914e-24 | 1.000000 | 1.53914e-24 | 1.000000 |
| rad68anti                     | 1.16781e-24 | 1.000000 | 1.16781e-24 | 1.000000 |
| rad64                         | 1.30790e-25 | 1.000000 | 1.30790e-25 | 1.000000 |

|           |             |         |             |         |
|-----------|-------------|---------|-------------|---------|
| rad56     | 8.51572e-26 | 1.00000 | 8.51572e-26 | 1.00000 |
| rad40syn  | 1.96625e-26 | 1.00000 | 1.96625e-26 | 1.00000 |
| rad40anti | 1.64701e-26 | 1.00000 | 1.64701e-26 | 1.00000 |
| PAH8+H    | 2.68460e-27 | 1.00000 | 2.68460e-27 | 1.00000 |
| rad73     | 1.50763e-28 | 1.00000 | 1.50763e-28 | 1.00000 |
| rad19syn  | 8.63574e-30 | 1.00000 | 8.63574e-30 | 1.00000 |
| rad71     | 9.81278e-31 | 1.00000 | 9.81278e-31 | 1.00000 |
| rad8      | 4.67501e-43 | 1.00000 | 4.67501e-43 | 1.00000 |

10000.0000 Pa, 220.000000 K

```

=====
Rate constant          | True (fraction)          Effective (fraction)
-----
Total                  | 1.97009e-14 (1.00   )  1.97009e-14 (1.00   )
Formation of rad19    | 1.96977e-14 (1.000  )  1.96977e-14 (1.000  )
H-abstraction to cyc2enyl | 3.19064e-18 (0.000162) 3.19064e-18 (0.000162)
H-abstraction to cyclenyl | 1.64627e-21 (8.36e-08) 1.64627e-21 (8.36e-08)

```

| species                       | PYtrue      | Cumul    | PYeffective | Cumul    |
|-------------------------------|-------------|----------|-------------|----------|
| rad9                          | 0.960085    | 0.960085 | 0.960085    | 0.960085 |
| Indene+H                      | 0.0375760   | 0.997661 | 0.0375760   | 0.997661 |
| rad15                         | 0.00216836  | 0.999830 | 0.00216836  | 0.999830 |
| Benzene+cycloprop-2-enylidene | 0.000161954 | 0.999992 | 0.000161954 | 0.999992 |
| PhCHCCH2+H                    | 7.64261e-06 | 0.999999 | 7.64261e-06 | 0.999999 |
| rad6                          | 3.38407e-07 | 1.000000 | 3.38407e-07 | 1.000000 |
| rad2                          | 2.77156e-07 | 1.000000 | 2.77156e-07 | 1.000000 |
| Benzene+cycloprop-1-enylidene | 8.35632e-08 | 1.000000 | 8.35632e-08 | 1.000000 |
| rad26                         | 4.70656e-08 | 1.000000 | 4.70656e-08 | 1.000000 |
| C2H2+PhCH2                    | 3.65906e-08 | 1.000000 | 3.65906e-08 | 1.000000 |
| rad23                         | 2.70420e-08 | 1.000000 | 2.70420e-08 | 1.000000 |
| rad11                         | 2.66125e-08 | 1.000000 | 2.66125e-08 | 1.000000 |
| rad10                         | 2.28090e-08 | 1.000000 | 2.28090e-08 | 1.000000 |
| rad1                          | 1.93116e-08 | 1.000000 | 1.93116e-08 | 1.000000 |
| rad67                         | 1.81301e-08 | 1.000000 | 1.81301e-08 | 1.000000 |
| rad12                         | 1.60886e-08 | 1.000000 | 1.60886e-08 | 1.000000 |
| rad19anti                     | 1.58985e-08 | 1.000000 | 1.58985e-08 | 1.000000 |
| rad22                         | 1.15254e-08 | 1.000000 | 1.15254e-08 | 1.000000 |
| rad45                         | 8.97348e-09 | 1.000000 | 8.97348e-09 | 1.000000 |
| rad35                         | 7.88114e-09 | 1.000000 | 7.88114e-09 | 1.000000 |
| PhCCH+CH3                     | 4.44899e-09 | 1.000000 | 4.44899e-09 | 1.000000 |
| PhCCCH3+H                     | 4.41105e-09 | 1.000000 | 4.41105e-09 | 1.000000 |
| rad3                          | 3.41160e-09 | 1.000000 | 3.41160e-09 | 1.000000 |
| Ph+MeAc                       | 3.37234e-09 | 1.000000 | 3.37234e-09 | 1.000000 |
| rad4                          | 1.77006e-09 | 1.000000 | 1.77006e-09 | 1.000000 |
| rad36                         | 5.62255e-10 | 1.000000 | 5.62255e-10 | 1.000000 |
| Ph+Allene                     | 4.69517e-10 | 1.000000 | 4.69517e-10 | 1.000000 |
| rad7                          | 3.59105e-10 | 1.000000 | 3.59105e-10 | 1.000000 |
| rad30                         | 1.36198e-10 | 1.000000 | 1.36198e-10 | 1.000000 |
| rad18                         | 1.15360e-10 | 1.000000 | 1.15360e-10 | 1.000000 |
| PhCH2CCH+H                    | 9.90029e-11 | 1.000000 | 9.90029e-11 | 1.000000 |
| rad5                          | 6.25553e-11 | 1.000000 | 6.25553e-11 | 1.000000 |
| PhcycC3H3_A+H                 | 2.99330e-11 | 1.000000 | 2.99330e-11 | 1.000000 |
| rad20                         | 9.33164e-12 | 1.000000 | 9.33164e-12 | 1.000000 |
| rad21                         | 6.37178e-12 | 1.000000 | 6.37178e-12 | 1.000000 |
| rad28                         | 6.31823e-12 | 1.000000 | 6.31823e-12 | 1.000000 |
| rad37                         | 2.96268e-12 | 1.000000 | 2.96268e-12 | 1.000000 |
| rad13                         | 2.52437e-12 | 1.000000 | 2.52437e-12 | 1.000000 |
| rad27                         | 1.96660e-12 | 1.000000 | 1.96660e-12 | 1.000000 |
| rad14                         | 1.49134e-12 | 1.000000 | 1.49134e-12 | 1.000000 |
| rad25                         | 7.88815e-13 | 1.000000 | 7.88815e-13 | 1.000000 |
| rad60syn                      | 7.24573e-13 | 1.000000 | 7.24573e-13 | 1.000000 |
| PAH3+H                        | 3.98520e-13 | 1.000000 | 3.98520e-13 | 1.000000 |
| Phenyl+cycC3H4                | 3.96946e-13 | 1.000000 | 0.000000    | 1.000000 |
| rad60anti                     | 3.61197e-13 | 1.000000 | 3.61197e-13 | 1.000000 |
| PAH7+H                        | 3.47299e-13 | 1.000000 | 3.47299e-13 | 1.000000 |
| PhcycC3H3_B+H                 | 2.48482e-13 | 1.000000 | 2.48482e-13 | 1.000000 |
| PAH9+H                        | 1.51754e-13 | 1.000000 | 1.51754e-13 | 1.000000 |
| rad38                         | 1.28078e-13 | 1.000000 | 1.28078e-13 | 1.000000 |
| rad59                         | 7.82373e-14 | 1.000000 | 7.82373e-14 | 1.000000 |
| PAH10+CH3                     | 9.19704e-15 | 1.000000 | 9.19704e-15 | 1.000000 |
| rad46                         | 8.36809e-15 | 1.000000 | 8.36809e-15 | 1.000000 |
| rad33                         | 3.41775e-15 | 1.000000 | 3.41775e-15 | 1.000000 |
| rad43                         | 1.34658e-15 | 1.000000 | 1.34658e-15 | 1.000000 |
| rad39                         | 1.12928e-15 | 1.000000 | 1.12928e-15 | 1.000000 |
| rad24                         | 2.64582e-16 | 1.000000 | 2.64582e-16 | 1.000000 |
| rad62                         | 1.56016e-16 | 1.000000 | 1.56016e-16 | 1.000000 |
| rad50                         | 8.20522e-17 | 1.000000 | 8.20522e-17 | 1.000000 |
| rad70                         | 6.98421e-17 | 1.000000 | 6.98421e-17 | 1.000000 |
| rad58                         | 1.92098e-17 | 1.000000 | 1.92098e-17 | 1.000000 |

|           |             |         |             |         |
|-----------|-------------|---------|-------------|---------|
| rad31     | 1.05419e-17 | 1.00000 | 1.05419e-17 | 1.00000 |
| rad54     | 8.01597e-18 | 1.00000 | 8.01597e-18 | 1.00000 |
| PAH1+H    | 2.62350e-18 | 1.00000 | 2.62350e-18 | 1.00000 |
| rad34     | 1.87487e-18 | 1.00000 | 1.87487e-18 | 1.00000 |
| rad52     | 7.80307e-19 | 1.00000 | 7.80307e-19 | 1.00000 |
| rad41     | 3.55478e-19 | 1.00000 | 3.55478e-19 | 1.00000 |
| rad51     | 3.26995e-19 | 1.00000 | 3.26995e-19 | 1.00000 |
| rad42     | 1.13227e-19 | 1.00000 | 1.13227e-19 | 1.00000 |
| rad55     | 1.09160e-19 | 1.00000 | 1.09160e-19 | 1.00000 |
| rad65     | 3.80367e-21 | 1.00000 | 3.80367e-21 | 1.00000 |
| rad61     | 1.08688e-22 | 1.00000 | 1.08688e-22 | 1.00000 |
| rad53     | 3.30244e-23 | 1.00000 | 3.30244e-23 | 1.00000 |
| rad68syn  | 4.52255e-24 | 1.00000 | 4.52255e-24 | 1.00000 |
| rad68anti | 3.40678e-24 | 1.00000 | 3.40678e-24 | 1.00000 |
| rad47     | 2.28069e-24 | 1.00000 | 2.28069e-24 | 1.00000 |
| rad64     | 4.07506e-25 | 1.00000 | 4.07506e-25 | 1.00000 |
| rad56     | 2.81629e-25 | 1.00000 | 2.81629e-25 | 1.00000 |
| rad40syn  | 7.93533e-26 | 1.00000 | 7.93533e-26 | 1.00000 |
| rad40anti | 6.67981e-26 | 1.00000 | 6.67981e-26 | 1.00000 |
| PAH8+H    | 1.28137e-26 | 1.00000 | 1.28137e-26 | 1.00000 |
| rad73     | 6.18930e-28 | 1.00000 | 6.18930e-28 | 1.00000 |
| rad19syn  | 3.05447e-29 | 1.00000 | 3.05447e-29 | 1.00000 |
| rad71     | 5.16702e-30 | 1.00000 | 5.16702e-30 | 1.00000 |
| rad8      | 5.75036e-43 | 1.00000 | 5.75036e-43 | 1.00000 |

10000.0000 Pa, 230.000000 K

| Rate constant             | True (fraction)        | Effective (fraction)   |
|---------------------------|------------------------|------------------------|
| Total                     | 2.20761e-14 (1.00 )    | 2.20761e-14 (1.00 )    |
| Formation of rad19        | 2.20710e-14 (1.000 )   | 2.20710e-14 (1.000 )   |
| H-abstraction to cyc2enyl | 5.13155e-18 (0.000232) | 5.13155e-18 (0.000232) |
| H-abstraction to cyclenyl | 3.75316e-21 (1.70e-07) | 3.75316e-21 (1.70e-07) |

| species                       | PYtrue      | Cumul    | PYeffective | Cumul    |
|-------------------------------|-------------|----------|-------------|----------|
| rad9                          | 0.957231    | 0.957231 | 0.957231    | 0.957231 |
| Indene+H                      | 0.0403791   | 0.997610 | 0.0403791   | 0.997610 |
| rad15                         | 0.00214700  | 0.999757 | 0.00214700  | 0.999757 |
| Benzene+cycloprop-2-enylidene | 0.000232448 | 0.999990 | 0.000232448 | 0.999990 |
| PhCHCCH2+H                    | 8.70406e-06 | 0.999999 | 8.70406e-06 | 0.999999 |
| rad6                          | 3.90673e-07 | 0.999999 | 3.90673e-07 | 0.999999 |
| rad2                          | 3.13329e-07 | 0.999999 | 3.13329e-07 | 0.999999 |
| Benzene+cycloprop-1-enylidene | 1.70010e-07 | 0.999999 | 1.70010e-07 | 0.999999 |
| rad26                         | 5.37848e-08 | 0.999999 | 5.37848e-08 | 0.999999 |
| C2H2+PhCH2                    | 4.28670e-08 | 1.000000 | 4.28670e-08 | 1.000000 |
| rad23                         | 3.11519e-08 | 1.000000 | 3.11519e-08 | 1.000000 |
| rad10                         | 2.71844e-08 | 1.000000 | 2.71844e-08 | 1.000000 |
| rad11                         | 2.61946e-08 | 1.000000 | 2.61946e-08 | 1.000000 |
| rad1                          | 2.20365e-08 | 1.000000 | 2.20365e-08 | 1.000000 |
| rad67                         | 2.11806e-08 | 1.000000 | 2.11806e-08 | 1.000000 |
| rad12                         | 1.58854e-08 | 1.000000 | 1.58854e-08 | 1.000000 |
| rad19anti                     | 1.57685e-08 | 1.000000 | 1.57685e-08 | 1.000000 |
| rad22                         | 1.14492e-08 | 1.000000 | 1.14492e-08 | 1.000000 |
| rad45                         | 9.99937e-09 | 1.000000 | 9.99937e-09 | 1.000000 |
| rad35                         | 9.17585e-09 | 1.000000 | 9.17585e-09 | 1.000000 |
| PhCCH+CH3                     | 6.00377e-09 | 1.000000 | 6.00377e-09 | 1.000000 |
| PhCCCH3+H                     | 5.81174e-09 | 1.000000 | 5.81174e-09 | 1.000000 |
| Ph+MeAc                       | 4.54617e-09 | 1.000000 | 4.54617e-09 | 1.000000 |
| rad3                          | 3.93213e-09 | 1.000000 | 3.93213e-09 | 1.000000 |
| rad4                          | 2.04532e-09 | 1.000000 | 2.04532e-09 | 1.000000 |
| rad36                         | 6.29117e-10 | 1.000000 | 6.29117e-10 | 1.000000 |
| Ph+Allene                     | 5.89933e-10 | 1.000000 | 5.89933e-10 | 1.000000 |
| rad7                          | 4.15836e-10 | 1.000000 | 4.15836e-10 | 1.000000 |
| rad30                         | 1.59282e-10 | 1.000000 | 1.59282e-10 | 1.000000 |
| PhCH2CCH+H                    | 1.27856e-10 | 1.000000 | 1.27856e-10 | 1.000000 |
| rad18                         | 1.08134e-10 | 1.000000 | 1.08134e-10 | 1.000000 |
| rad5                          | 7.16427e-11 | 1.000000 | 7.16427e-11 | 1.000000 |
| PhcycC3H3_A+H                 | 3.98992e-11 | 1.000000 | 3.98992e-11 | 1.000000 |
| rad20                         | 8.81514e-12 | 1.000000 | 8.81514e-12 | 1.000000 |
| rad28                         | 8.59228e-12 | 1.000000 | 8.59228e-12 | 1.000000 |
| rad21                         | 6.01497e-12 | 1.000000 | 6.01497e-12 | 1.000000 |
| rad37                         | 4.07276e-12 | 1.000000 | 4.07276e-12 | 1.000000 |
| rad13                         | 2.86111e-12 | 1.000000 | 2.86111e-12 | 1.000000 |
| rad27                         | 2.19055e-12 | 1.000000 | 2.19055e-12 | 1.000000 |
| rad14                         | 1.71106e-12 | 1.000000 | 1.71106e-12 | 1.000000 |
| rad60syn                      | 8.78728e-13 | 1.000000 | 8.78728e-13 | 1.000000 |
| rad25                         | 7.68482e-13 | 1.000000 | 7.68482e-13 | 1.000000 |
| Phenyl+cycC3H4                | 5.81817e-13 | 1.000000 | 0.00000     | 1.000000 |
| PAH3+H                        | 5.05861e-13 | 1.000000 | 5.05861e-13 | 1.000000 |

|               |             |          |             |          |
|---------------|-------------|----------|-------------|----------|
| PAH7+H        | 4.52262e-13 | 1.000000 | 4.52262e-13 | 1.000000 |
| rad60anti     | 4.39459e-13 | 1.000000 | 4.39459e-13 | 1.000000 |
| PhcycC3H3_B+H | 4.09922e-13 | 1.000000 | 4.09922e-13 | 1.000000 |
| PAH9+H        | 2.10920e-13 | 1.000000 | 2.10920e-13 | 1.000000 |
| rad38         | 1.71854e-13 | 1.000000 | 1.71854e-13 | 1.000000 |
| rad59         | 9.85731e-14 | 1.000000 | 9.85731e-14 | 1.000000 |
| PAH10+CH3     | 1.45532e-14 | 1.000000 | 1.45532e-14 | 1.000000 |
| rad46         | 1.13696e-14 | 1.000000 | 1.13696e-14 | 1.000000 |
| rad33         | 3.86780e-15 | 1.000000 | 3.86780e-15 | 1.000000 |
| rad43         | 2.08025e-15 | 1.000000 | 2.08025e-15 | 1.000000 |
| rad39         | 1.93014e-15 | 1.000000 | 1.93014e-15 | 1.000000 |
| rad24         | 2.91201e-16 | 1.000000 | 2.91201e-16 | 1.000000 |
| rad62         | 2.52850e-16 | 1.000000 | 2.52850e-16 | 1.000000 |
| rad50         | 1.21155e-16 | 1.000000 | 1.21155e-16 | 1.000000 |
| rad70         | 1.05395e-16 | 1.000000 | 1.05395e-16 | 1.000000 |
| rad58         | 2.81170e-17 | 1.000000 | 2.81170e-17 | 1.000000 |
| rad54         | 1.33902e-17 | 1.000000 | 1.33902e-17 | 1.000000 |
| rad31         | 1.28943e-17 | 1.000000 | 1.28943e-17 | 1.000000 |
| PAH1+H        | 4.81250e-18 | 1.000000 | 4.81250e-18 | 1.000000 |
| rad34         | 3.04992e-18 | 1.000000 | 3.04992e-18 | 1.000000 |
| rad52         | 1.21984e-18 | 1.000000 | 1.21984e-18 | 1.000000 |
| rad41         | 6.70704e-19 | 1.000000 | 6.70704e-19 | 1.000000 |
| rad51         | 5.43351e-19 | 1.000000 | 5.43351e-19 | 1.000000 |
| rad42         | 2.16129e-19 | 1.000000 | 2.16129e-19 | 1.000000 |
| rad55         | 1.94966e-19 | 1.000000 | 1.94966e-19 | 1.000000 |
| rad65         | 6.88279e-21 | 1.000000 | 6.88279e-21 | 1.000000 |
| rad61         | 3.04516e-22 | 1.000000 | 3.04516e-22 | 1.000000 |
| rad53         | 7.95133e-23 | 1.000000 | 7.95133e-23 | 1.000000 |
| rad68syn      | 1.25650e-23 | 1.000000 | 1.25650e-23 | 1.000000 |
| rad68anti     | 9.40109e-24 | 1.000000 | 9.40109e-24 | 1.000000 |
| rad47         | 2.82582e-24 | 1.000000 | 2.82582e-24 | 1.000000 |
| rad64         | 1.23055e-24 | 1.000000 | 1.23055e-24 | 1.000000 |
| rad56         | 8.82442e-25 | 1.000000 | 8.82442e-25 | 1.000000 |
| rad40syn      | 2.92056e-25 | 1.000000 | 2.92056e-25 | 1.000000 |
| rad40anti     | 2.46987e-25 | 1.000000 | 2.46987e-25 | 1.000000 |
| PAH8+H        | 5.43620e-26 | 1.000000 | 5.43620e-26 | 1.000000 |
| rad73         | 2.33482e-27 | 1.000000 | 2.33482e-27 | 1.000000 |
| rad19syn      | 1.13368e-28 | 1.000000 | 1.13368e-28 | 1.000000 |
| rad71         | 2.39401e-29 | 1.000000 | 2.39401e-29 | 1.000000 |
| rad8          | 7.34270e-43 | 1.000000 | 7.34270e-43 | 1.000000 |

10000.0000 Pa, 240.000000 K

=====

| Rate constant             | True (fraction)        | Effective (fraction)   |
|---------------------------|------------------------|------------------------|
| Total                     | 2.45462e-14 (1.00 )    | 2.45462e-14 (1.00 )    |
| Formation of rad19        | 2.45383e-14 (1.000 )   | 2.45383e-14 (1.000 )   |
| H-abstraction to cyc2enyl | 7.92234e-18 (0.000323) | 7.92234e-18 (0.000323) |
| H-abstraction to cyclenyl | 7.97958e-21 (3.25e-07) | 7.97958e-21 (3.25e-07) |

| species                       | PYtrue      | Cumul    | PYeffective | Cumul    |
|-------------------------------|-------------|----------|-------------|----------|
| rad9                          | 0.954160    | 0.954160 | 0.954160    | 0.954160 |
| Indene+H                      | 0.0433801   | 0.997540 | 0.0433801   | 0.997540 |
| rad15                         | 0.00212610  | 0.999666 | 0.00212610  | 0.999666 |
| Benzene+cycloprop-2-enylidene | 0.000322752 | 0.999989 | 0.000322752 | 0.999989 |
| PhCHCCH2+H                    | 9.93974e-06 | 0.999999 | 9.93974e-06 | 0.999999 |
| rad6                          | 4.51756e-07 | 0.999999 | 4.51756e-07 | 0.999999 |
| rad2                          | 3.54652e-07 | 0.999999 | 3.54652e-07 | 0.999999 |
| Benzene+cycloprop-1-enylidene | 3.25084e-07 | 1.000000 | 3.25084e-07 | 1.000000 |
| rad26                         | 6.16290e-08 | 1.000000 | 6.16290e-08 | 1.000000 |
| C2H2+PhCH2                    | 5.03853e-08 | 1.000000 | 5.03853e-08 | 1.000000 |
| rad23                         | 3.58843e-08 | 1.000000 | 3.58843e-08 | 1.000000 |
| rad10                         | 3.23558e-08 | 1.000000 | 3.23558e-08 | 1.000000 |
| rad11                         | 2.57517e-08 | 1.000000 | 2.57517e-08 | 1.000000 |
| rad1                          | 2.51973e-08 | 1.000000 | 2.51973e-08 | 1.000000 |
| rad67                         | 2.48295e-08 | 1.000000 | 2.48295e-08 | 1.000000 |
| rad12                         | 1.57086e-08 | 1.000000 | 1.57086e-08 | 1.000000 |
| rad19anti                     | 1.56946e-08 | 1.000000 | 1.56946e-08 | 1.000000 |
| rad22                         | 1.13516e-08 | 1.000000 | 1.13516e-08 | 1.000000 |
| rad45                         | 1.11710e-08 | 1.000000 | 1.11710e-08 | 1.000000 |
| rad35                         | 1.07187e-08 | 1.000000 | 1.07187e-08 | 1.000000 |
| PhCCH+CH3                     | 8.10747e-09 | 1.000000 | 8.10747e-09 | 1.000000 |
| PhCCCH3+H                     | 7.69365e-09 | 1.000000 | 7.69365e-09 | 1.000000 |
| Ph+MeAc                       | 6.16110e-09 | 1.000000 | 6.16110e-09 | 1.000000 |
| rad3                          | 4.52708e-09 | 1.000000 | 4.52708e-09 | 1.000000 |
| rad4                          | 2.36138e-09 | 1.000000 | 2.36138e-09 | 1.000000 |
| Ph+Allene                     | 7.44395e-10 | 1.000000 | 7.44395e-10 | 1.000000 |
| rad36                         | 7.06100e-10 | 1.000000 | 7.06100e-10 | 1.000000 |
| rad7                          | 4.81856e-10 | 1.000000 | 4.81856e-10 | 1.000000 |

|                |             |          |             |          |
|----------------|-------------|----------|-------------|----------|
| rad30          | 1.86936e-10 | 1.000000 | 1.86936e-10 | 1.000000 |
| PhCH2CCH+H     | 1.65939e-10 | 1.000000 | 1.65939e-10 | 1.000000 |
| rad18          | 1.01629e-10 | 1.000000 | 1.01629e-10 | 1.000000 |
| rad5           | 8.18227e-11 | 1.000000 | 8.18227e-11 | 1.000000 |
| PhcycC3H3_A+H  | 5.32842e-11 | 1.000000 | 5.32842e-11 | 1.000000 |
| rad28          | 1.17347e-11 | 1.000000 | 1.17347e-11 | 1.000000 |
| rad20          | 8.34026e-12 | 1.000000 | 8.34026e-12 | 1.000000 |
| rad21          | 5.68720e-12 | 1.000000 | 5.68720e-12 | 1.000000 |
| rad37          | 5.64400e-12 | 1.000000 | 5.64400e-12 | 1.000000 |
| rad13          | 3.25057e-12 | 1.000000 | 3.25057e-12 | 1.000000 |
| rad27          | 2.44522e-12 | 1.000000 | 2.44522e-12 | 1.000000 |
| rad14          | 1.96091e-12 | 1.000000 | 1.96091e-12 | 1.000000 |
| rad60syn       | 1.07106e-12 | 1.000000 | 1.07106e-12 | 1.000000 |
| Phenyl+cycC3H4 | 8.50530e-13 | 1.000000 | 0.00000     | 1.000000 |
| rad25          | 7.48200e-13 | 1.000000 | 7.48200e-13 | 1.000000 |
| PhcycC3H3_B+H  | 6.66144e-13 | 1.000000 | 6.66144e-13 | 1.000000 |
| PAH3+H         | 6.46399e-13 | 1.000000 | 6.46399e-13 | 1.000000 |
| PAH7+H         | 5.92601e-13 | 1.000000 | 5.92601e-13 | 1.000000 |
| rad60anti      | 5.37440e-13 | 1.000000 | 5.37440e-13 | 1.000000 |
| PAH9+H         | 2.94513e-13 | 1.000000 | 2.94513e-13 | 1.000000 |
| rad38          | 2.32491e-13 | 1.000000 | 2.32491e-13 | 1.000000 |
| rad59          | 1.24983e-13 | 1.000000 | 1.24983e-13 | 1.000000 |
| PAH10+CH3      | 2.32597e-14 | 1.000000 | 2.32597e-14 | 1.000000 |
| rad46          | 1.55653e-14 | 1.000000 | 1.55653e-14 | 1.000000 |
| rad33          | 4.39014e-15 | 1.000000 | 4.39014e-15 | 1.000000 |
| rad39          | 3.32695e-15 | 1.000000 | 3.32695e-15 | 1.000000 |
| rad43          | 3.23323e-15 | 1.000000 | 3.23323e-15 | 1.000000 |
| rad62          | 4.09364e-16 | 1.000000 | 4.09364e-16 | 1.000000 |
| rad24          | 3.21773e-16 | 1.000000 | 3.21773e-16 | 1.000000 |
| rad50          | 1.80694e-16 | 1.000000 | 1.80694e-16 | 1.000000 |
| rad70          | 1.59764e-16 | 1.000000 | 1.59764e-16 | 1.000000 |
| rad58          | 4.14384e-17 | 1.000000 | 4.14384e-17 | 1.000000 |
| rad54          | 2.25401e-17 | 1.000000 | 2.25401e-17 | 1.000000 |
| rad31          | 1.58962e-17 | 1.000000 | 1.58962e-17 | 1.000000 |
| PAH1+H         | 8.86359e-18 | 1.000000 | 8.86359e-18 | 1.000000 |
| rad34          | 4.97007e-18 | 1.000000 | 4.97007e-18 | 1.000000 |
| rad52          | 1.92701e-18 | 1.000000 | 1.92701e-18 | 1.000000 |
| rad41          | 1.26089e-18 | 1.000000 | 1.26089e-18 | 1.000000 |
| rad51          | 9.11888e-19 | 1.000000 | 9.11888e-19 | 1.000000 |
| rad42          | 4.08594e-19 | 1.000000 | 4.08594e-19 | 1.000000 |
| rad55          | 3.50107e-19 | 1.000000 | 3.50107e-19 | 1.000000 |
| rad65          | 1.25169e-20 | 1.000000 | 1.25169e-20 | 1.000000 |
| rad61          | 8.19274e-22 | 1.000000 | 8.19274e-22 | 1.000000 |
| rad53          | 1.88009e-22 | 1.000000 | 1.88009e-22 | 1.000000 |
| rad68syn       | 3.31686e-23 | 1.000000 | 3.31686e-23 | 1.000000 |
| rad68anti      | 2.46623e-23 | 1.000000 | 2.46623e-23 | 1.000000 |
| rad64          | 3.58827e-24 | 1.000000 | 3.58827e-24 | 1.000000 |
| rad47          | 3.54227e-24 | 1.000000 | 3.54227e-24 | 1.000000 |
| rad56          | 2.62345e-24 | 1.000000 | 2.62345e-24 | 1.000000 |
| rad40syn       | 9.87152e-25 | 1.000000 | 9.87152e-25 | 1.000000 |
| rad40anti      | 8.38424e-25 | 1.000000 | 8.38424e-25 | 1.000000 |
| PAH8+H         | 2.07067e-25 | 1.000000 | 2.07067e-25 | 1.000000 |
| rad73          | 8.13040e-27 | 1.000000 | 8.13040e-27 | 1.000000 |
| rad19syn       | 4.40657e-28 | 1.000000 | 4.40657e-28 | 1.000000 |
| rad71          | 9.87022e-29 | 1.000000 | 9.87022e-29 | 1.000000 |
| rad8           | 9.73532e-43 | 1.000000 | 9.73532e-43 | 1.000000 |

10000.0000 Pa, 250.000000 K

=====

| Rate constant             | True (fraction)        | Effective (fraction)   |
|---------------------------|------------------------|------------------------|
| Total                     | 2.71048e-14 (1.00 )    | 2.71048e-14 (1.00 )    |
| Formation of rad19        | 2.70930e-14 (1.000 )   | 2.70930e-14 (1.000 )   |
| H-abstraction to cyc2enyl | 1.17991e-17 (0.000435) | 1.17991e-17 (0.000435) |
| H-abstraction to cyc1enyl | 1.59554e-20 (5.89e-07) | 1.59554e-20 (5.89e-07) |

| species                       | PYtrue      | Cumul    | PYeffective | Cumul    |
|-------------------------------|-------------|----------|-------------|----------|
| rad9                          | 0.950846    | 0.950846 | 0.950846    | 0.950846 |
| Indene+H                      | 0.0465996   | 0.997446 | 0.0465996   | 0.997446 |
| rad15                         | 0.00210553  | 0.999551 | 0.00210553  | 0.999551 |
| Benzene+cycloprop-2-enylidene | 0.000435312 | 0.999987 | 0.000435312 | 0.999987 |
| PhCHCCH2+H                    | 1.13829e-05 | 0.999998 | 1.13829e-05 | 0.999998 |
| Benzene+cycloprop-1-enylidene | 5.88656e-07 | 0.999999 | 5.88656e-07 | 0.999999 |
| rad6                          | 5.23376e-07 | 0.999999 | 5.23376e-07 | 0.999999 |
| rad2                          | 4.01846e-07 | 1.000000 | 4.01846e-07 | 1.000000 |
| rad26                         | 7.08129e-08 | 1.000000 | 7.08129e-08 | 1.000000 |
| C2H2+PhCH2                    | 5.94243e-08 | 1.000000 | 5.94243e-08 | 1.000000 |
| rad23                         | 4.13401e-08 | 1.000000 | 4.13401e-08 | 1.000000 |
| rad10                         | 3.84486e-08 | 1.000000 | 3.84486e-08 | 1.000000 |

|                |             |          |             |          |
|----------------|-------------|----------|-------------|----------|
| rad67          | 2.92093e-08 | 1.000000 | 2.92093e-08 | 1.000000 |
| rad1           | 2.88670e-08 | 1.000000 | 2.88670e-08 | 1.000000 |
| rad11          | 2.52891e-08 | 1.000000 | 2.52891e-08 | 1.000000 |
| rad19anti      | 1.56781e-08 | 1.000000 | 1.56781e-08 | 1.000000 |
| rad12          | 1.55561e-08 | 1.000000 | 1.55561e-08 | 1.000000 |
| rad35          | 1.25636e-08 | 1.000000 | 1.25636e-08 | 1.000000 |
| rad45          | 1.25124e-08 | 1.000000 | 1.25124e-08 | 1.000000 |
| rad22          | 1.12349e-08 | 1.000000 | 1.12349e-08 | 1.000000 |
| PhCCH+CH3      | 1.09517e-08 | 1.000000 | 1.09517e-08 | 1.000000 |
| PhCCCH3+H      | 1.02286e-08 | 1.000000 | 1.02286e-08 | 1.000000 |
| Ph+MeAc        | 8.38866e-09 | 1.000000 | 8.38866e-09 | 1.000000 |
| rad3           | 5.20629e-09 | 1.000000 | 5.20629e-09 | 1.000000 |
| rad4           | 2.72398e-09 | 1.000000 | 2.72398e-09 | 1.000000 |
| Ph+Allene      | 9.43287e-10 | 1.000000 | 9.43287e-10 | 1.000000 |
| rad36          | 7.95007e-10 | 1.000000 | 7.95007e-10 | 1.000000 |
| rad7           | 5.58895e-10 | 1.000000 | 5.58895e-10 | 1.000000 |
| rad30          | 2.20191e-10 | 1.000000 | 2.20191e-10 | 1.000000 |
| PhCH2CCH+H     | 2.16398e-10 | 1.000000 | 2.16398e-10 | 1.000000 |
| rad18          | 9.57425e-11 | 1.000000 | 9.57425e-11 | 1.000000 |
| rad5           | 9.31328e-11 | 1.000000 | 9.31328e-11 | 1.000000 |
| PhcycC3H3_A+H  | 7.12389e-11 | 1.000000 | 7.12389e-11 | 1.000000 |
| rad28          | 1.60920e-11 | 1.000000 | 1.60920e-11 | 1.000000 |
| rad20          | 7.90240e-12 | 1.000000 | 7.90240e-12 | 1.000000 |
| rad37          | 7.88186e-12 | 1.000000 | 7.88186e-12 | 1.000000 |
| rad21          | 5.38524e-12 | 1.000000 | 5.38524e-12 | 1.000000 |
| rad13          | 3.70240e-12 | 1.000000 | 3.70240e-12 | 1.000000 |
| rad27          | 2.73468e-12 | 1.000000 | 2.73468e-12 | 1.000000 |
| rad14          | 2.24471e-12 | 1.000000 | 2.24471e-12 | 1.000000 |
| rad60syn       | 1.31209e-12 | 1.000000 | 1.31209e-12 | 1.000000 |
| Phenyl+cycC3H4 | 1.23950e-12 | 1.000000 | 0.000000    | 1.000000 |
| PhcycC3H3_B+H  | 1.06758e-12 | 1.000000 | 1.06758e-12 | 1.000000 |
| PAH3+H         | 8.31333e-13 | 1.000000 | 8.31333e-13 | 1.000000 |
| PAH7+H         | 7.81503e-13 | 1.000000 | 7.81503e-13 | 1.000000 |
| rad25          | 7.28063e-13 | 1.000000 | 7.28063e-13 | 1.000000 |
| rad60anti      | 6.60663e-13 | 1.000000 | 6.60663e-13 | 1.000000 |
| PAH9+H         | 4.13117e-13 | 1.000000 | 4.13117e-13 | 1.000000 |
| rad38          | 3.17156e-13 | 1.000000 | 3.17156e-13 | 1.000000 |
| rad59          | 1.59445e-13 | 1.000000 | 1.59445e-13 | 1.000000 |
| PAH10+CH3      | 3.74890e-14 | 1.000000 | 3.74890e-14 | 1.000000 |
| rad46          | 2.14701e-14 | 1.000000 | 2.14701e-14 | 1.000000 |
| rad39          | 5.77402e-15 | 1.000000 | 5.77402e-15 | 1.000000 |
| rad43          | 5.04727e-15 | 1.000000 | 5.04727e-15 | 1.000000 |
| rad33          | 4.99849e-15 | 1.000000 | 4.99849e-15 | 1.000000 |
| rad62          | 6.61223e-16 | 1.000000 | 6.61223e-16 | 1.000000 |
| rad24          | 3.56962e-16 | 1.000000 | 3.56962e-16 | 1.000000 |
| rad50          | 2.72030e-16 | 1.000000 | 2.72030e-16 | 1.000000 |
| rad70          | 2.43021e-16 | 1.000000 | 2.43021e-16 | 1.000000 |
| rad58          | 6.14261e-17 | 1.000000 | 6.14261e-17 | 1.000000 |
| rad54          | 3.81733e-17 | 1.000000 | 3.81733e-17 | 1.000000 |
| rad31          | 1.97605e-17 | 1.000000 | 1.97605e-17 | 1.000000 |
| PAH1+H         | 1.63480e-17 | 1.000000 | 1.63480e-17 | 1.000000 |
| rad34          | 8.10320e-18 | 1.000000 | 8.10320e-18 | 1.000000 |
| rad52          | 3.07272e-18 | 1.000000 | 3.07272e-18 | 1.000000 |
| rad41          | 2.35662e-18 | 1.000000 | 2.35662e-18 | 1.000000 |
| rad51          | 1.54313e-18 | 1.000000 | 1.54313e-18 | 1.000000 |
| rad42          | 7.64024e-19 | 1.000000 | 7.64024e-19 | 1.000000 |
| rad55          | 6.30788e-19 | 1.000000 | 6.30788e-19 | 1.000000 |
| rad65          | 2.28289e-20 | 1.000000 | 2.28289e-20 | 1.000000 |
| rad61          | 2.11702e-21 | 1.000000 | 2.11702e-21 | 1.000000 |
| rad53          | 4.35650e-22 | 1.000000 | 4.35650e-22 | 1.000000 |
| rad68syn       | 8.34602e-23 | 1.000000 | 8.34602e-23 | 1.000000 |
| rad68anti      | 6.17088e-23 | 1.000000 | 6.17088e-23 | 1.000000 |
| rad64          | 1.00625e-23 | 1.000000 | 1.00625e-23 | 1.000000 |
| rad56          | 7.40248e-24 | 1.000000 | 7.40248e-24 | 1.000000 |
| rad47          | 4.49807e-24 | 1.000000 | 4.49807e-24 | 1.000000 |
| rad40syn       | 3.08188e-24 | 1.000000 | 3.08188e-24 | 1.000000 |
| rad40anti      | 2.62808e-24 | 1.000000 | 2.62808e-24 | 1.000000 |
| PAH8+H         | 7.14475e-25 | 1.000000 | 7.14475e-25 | 1.000000 |
| rad73          | 2.62346e-26 | 1.000000 | 2.62346e-26 | 1.000000 |
| rad19syn       | 1.78935e-27 | 1.000000 | 1.78935e-27 | 1.000000 |
| rad71          | 3.65811e-28 | 1.000000 | 3.65811e-28 | 1.000000 |
| rad8           | 1.34283e-42 | 1.000000 | 1.34283e-42 | 1.000000 |

10000.0000 Pa, 260.000000 K

| Rate constant             | True (fraction)        | Effective (fraction)   |
|---------------------------|------------------------|------------------------|
| Total                     | 2.97464e-14 (1.00)     | 2.97464e-14 (1.00)     |
| Formation of rad19        | 2.97293e-14 (0.999)    | 2.97293e-14 (0.999)    |
| H-abstraction to cyc2enyl | 1.70236e-17 (0.000572) | 1.70236e-17 (0.000572) |

H-abstraction to cyclenyl | 3.02186e-20 (1.02e-06) 3.02186e-20 (1.02e-06)

| species                       | PYtrue      | Cumul    | PYeffective | Cumul    |
|-------------------------------|-------------|----------|-------------|----------|
| rad9                          | 0.947268    | 0.947268 | 0.947268    | 0.947268 |
| Indene+H                      | 0.0500597   | 0.997327 | 0.0500597   | 0.997327 |
| rad15                         | 0.00208516  | 0.999412 | 0.00208516  | 0.999412 |
| Benzene+cycloprop-2-enylidene | 0.000572291 | 0.999985 | 0.000572291 | 0.999985 |
| PhCHCCH2+H                    | 1.30734e-05 | 0.999998 | 1.30734e-05 | 0.999998 |
| Benzene+cycloprop-1-enylidene | 1.01588e-06 | 0.999999 | 1.01588e-06 | 0.999999 |
| rad6                          | 6.07584e-07 | 0.999999 | 6.07584e-07 | 0.999999 |
| rad2                          | 4.55680e-07 | 1.000000 | 4.55680e-07 | 1.000000 |
| rad26                         | 8.15908e-08 | 1.000000 | 8.15908e-08 | 1.000000 |
| C2H2+PhCH2                    | 7.03262e-08 | 1.000000 | 7.03262e-08 | 1.000000 |
| rad23                         | 4.76339e-08 | 1.000000 | 4.76339e-08 | 1.000000 |
| rad10                         | 4.55983e-08 | 1.000000 | 4.55983e-08 | 1.000000 |
| rad67                         | 3.44820e-08 | 1.000000 | 3.44820e-08 | 1.000000 |
| rad1                          | 3.31278e-08 | 1.000000 | 3.31278e-08 | 1.000000 |
| rad11                         | 2.48122e-08 | 1.000000 | 2.48122e-08 | 1.000000 |
| rad19anti                     | 1.57215e-08 | 1.000000 | 1.57215e-08 | 1.000000 |
| rad12                         | 1.54267e-08 | 1.000000 | 1.54267e-08 | 1.000000 |
| PhCCH+CH3                     | 1.47909e-08 | 1.000000 | 1.47909e-08 | 1.000000 |
| rad35                         | 1.47763e-08 | 1.000000 | 1.47763e-08 | 1.000000 |
| rad45                         | 1.40508e-08 | 1.000000 | 1.40508e-08 | 1.000000 |
| PhCCCH3+H                     | 1.36482e-08 | 1.000000 | 1.36482e-08 | 1.000000 |
| Ph+MeAc                       | 1.14654e-08 | 1.000000 | 1.14654e-08 | 1.000000 |
| rad22                         | 1.11013e-08 | 1.000000 | 1.11013e-08 | 1.000000 |
| rad3                          | 5.98025e-09 | 1.000000 | 5.98025e-09 | 1.000000 |
| rad4                          | 3.13938e-09 | 1.000000 | 3.13938e-09 | 1.000000 |
| Ph+Allene                     | 1.20024e-09 | 1.000000 | 1.20024e-09 | 1.000000 |
| rad36                         | 8.97936e-10 | 1.000000 | 8.97936e-10 | 1.000000 |
| rad7                          | 6.49015e-10 | 1.000000 | 6.49015e-10 | 1.000000 |
| PhCH2CCH+H                    | 2.83469e-10 | 1.000000 | 2.83469e-10 | 1.000000 |
| rad30                         | 2.60318e-10 | 1.000000 | 2.60318e-10 | 1.000000 |
| rad5                          | 1.05584e-10 | 1.000000 | 1.05584e-10 | 1.000000 |
| PhcycC3H3_A+H                 | 9.52798e-11 | 1.000000 | 9.52798e-11 | 1.000000 |
| rad18                         | 9.03928e-11 | 1.000000 | 9.03928e-11 | 1.000000 |
| rad28                         | 2.21503e-11 | 1.000000 | 2.21503e-11 | 1.000000 |
| rad37                         | 1.10859e-11 | 1.000000 | 1.10859e-11 | 1.000000 |
| rad20                         | 7.49783e-12 | 1.000000 | 7.49783e-12 | 1.000000 |
| rad21                         | 5.10649e-12 | 1.000000 | 5.10649e-12 | 1.000000 |
| rad13                         | 4.22801e-12 | 1.000000 | 4.22801e-12 | 1.000000 |
| rad27                         | 3.06328e-12 | 1.000000 | 3.06328e-12 | 1.000000 |
| rad14                         | 2.56659e-12 | 1.000000 | 2.56659e-12 | 1.000000 |
| Phenyl+cycC3H4                | 1.79995e-12 | 1.000000 | 0.000000    | 1.000000 |
| PhcycC3H3_B+H                 | 1.68879e-12 | 1.000000 | 1.68879e-12 | 1.000000 |
| rad60syn                      | 1.61534e-12 | 1.000000 | 1.61534e-12 | 1.000000 |
| PAH3+H                        | 1.07575e-12 | 1.000000 | 1.07575e-12 | 1.000000 |
| PAH7+H                        | 1.03750e-12 | 1.000000 | 1.03750e-12 | 1.000000 |
| rad60anti                     | 8.16247e-13 | 1.000000 | 8.16247e-13 | 1.000000 |
| rad25                         | 7.08170e-13 | 1.000000 | 7.08170e-13 | 1.000000 |
| PAH9+H                        | 5.81986e-13 | 1.000000 | 5.81986e-13 | 1.000000 |
| rad38                         | 4.36236e-13 | 1.000000 | 4.36236e-13 | 1.000000 |
| rad59                         | 2.04609e-13 | 1.000000 | 2.04609e-13 | 1.000000 |
| PAH10+CH3                     | 6.08205e-14 | 1.000000 | 6.08205e-14 | 1.000000 |
| rad46                         | 2.98303e-14 | 1.000000 | 2.98303e-14 | 1.000000 |
| rad39                         | 1.00693e-14 | 1.000000 | 1.00693e-14 | 1.000000 |
| rad43                         | 7.89895e-15 | 1.000000 | 7.89895e-15 | 1.000000 |
| rad33                         | 5.70919e-15 | 1.000000 | 5.70919e-15 | 1.000000 |
| rad62                         | 1.06413e-15 | 1.000000 | 1.06413e-15 | 1.000000 |
| rad50                         | 4.13009e-16 | 1.000000 | 4.13009e-16 | 1.000000 |
| rad24                         | 3.97536e-16 | 1.000000 | 3.97536e-16 | 1.000000 |
| rad70                         | 3.70533e-16 | 1.000000 | 3.70533e-16 | 1.000000 |
| rad58                         | 9.14749e-17 | 1.000000 | 9.14749e-17 | 1.000000 |
| rad54                         | 6.49160e-17 | 1.000000 | 6.49160e-17 | 1.000000 |
| PAH1+H                        | 3.01083e-17 | 1.000000 | 3.01083e-17 | 1.000000 |
| rad31                         | 2.47798e-17 | 1.000000 | 2.47798e-17 | 1.000000 |
| rad34                         | 1.32006e-17 | 1.000000 | 1.32006e-17 | 1.000000 |
| rad52                         | 4.93832e-18 | 1.000000 | 4.93832e-18 | 1.000000 |
| rad41                         | 4.36888e-18 | 1.000000 | 4.36888e-18 | 1.000000 |
| rad51                         | 2.62770e-18 | 1.000000 | 2.62770e-18 | 1.000000 |
| rad42                         | 1.41109e-18 | 1.000000 | 1.41109e-18 | 1.000000 |
| rad55                         | 1.13750e-18 | 1.000000 | 1.13750e-18 | 1.000000 |
| rad65                         | 4.16568e-20 | 1.000000 | 4.16568e-20 | 1.000000 |
| rad61                         | 5.25092e-21 | 1.000000 | 5.25092e-21 | 1.000000 |
| rad53                         | 9.86549e-22 | 1.000000 | 9.86549e-22 | 1.000000 |
| rad68syn                      | 2.00587e-22 | 1.000000 | 2.00587e-22 | 1.000000 |
| rad68anti                     | 1.47574e-22 | 1.000000 | 1.47574e-22 | 1.000000 |
| rad64                         | 2.70347e-23 | 1.000000 | 2.70347e-23 | 1.000000 |
| rad56                         | 1.98219e-23 | 1.000000 | 1.98219e-23 | 1.000000 |



|           |             |         |             |         |
|-----------|-------------|---------|-------------|---------|
| rad40syn  | 8.93152e-24 | 1.00000 | 8.93152e-24 | 1.00000 |
| rad40anti | 7.64494e-24 | 1.00000 | 7.64494e-24 | 1.00000 |
| rad47     | 5.79356e-24 | 1.00000 | 5.79356e-24 | 1.00000 |
| PAH8+H    | 2.25117e-24 | 1.00000 | 2.25117e-24 | 1.00000 |
| rad73     | 7.87193e-26 | 1.00000 | 7.87193e-26 | 1.00000 |
| rad19syn  | 7.56793e-27 | 1.00000 | 7.56793e-27 | 1.00000 |
| rad71     | 1.23010e-27 | 1.00000 | 1.23010e-27 | 1.00000 |
| rad8      | 1.93604e-42 | 1.00000 | 1.93604e-42 | 1.00000 |

10000.0000 Pa, 270.000000 K

=====

| Rate constant             | True (fraction)        | Effective (fraction)   |
|---------------------------|------------------------|------------------------|
| Total                     | 3.24655e-14 (1.00 )    | 3.24655e-14 (1.00 )    |
| Formation of rad19        | 3.24415e-14 (0.999 )   | 3.24415e-14 (0.999 )   |
| H-abstraction to cyc2enyl | 2.38790e-17 (0.000736) | 2.38790e-17 (0.000736) |
| H-abstraction to cyclenyl | 5.45397e-20 (1.68e-06) | 5.45397e-20 (1.68e-06) |

| species                       | PYtrue      | Cumul    | PYeffective | Cumul    |
|-------------------------------|-------------|----------|-------------|----------|
| rad9                          | 0.943397    | 0.943397 | 0.943397    | 0.943397 |
| Indene+H                      | 0.0537839   | 0.997181 | 0.0537839   | 0.997181 |
| rad15                         | 0.00206489  | 0.999246 | 0.00206489  | 0.999246 |
| Benzene+cycloprop-2-enylidene | 0.000735519 | 0.999981 | 0.000735519 | 0.999981 |
| PhCHCCH2+H                    | 1.50585e-05 | 0.999996 | 1.50585e-05 | 0.999996 |
| Benzene+cycloprop-1-enylidene | 1.67993e-06 | 0.999998 | 1.67993e-06 | 0.999998 |
| rad6                          | 7.06839e-07 | 0.999999 | 7.06839e-07 | 0.999999 |
| rad2                          | 5.16960e-07 | 0.999999 | 5.16960e-07 | 0.999999 |
| rad26                         | 9.42629e-08 | 0.999999 | 9.42629e-08 | 0.999999 |
| C2H2+PhCH2                    | 8.35119e-08 | 0.999999 | 8.35119e-08 | 0.999999 |
| rad23                         | 5.48955e-08 | 1.000000 | 5.48955e-08 | 1.000000 |
| rad10                         | 5.39479e-08 | 1.000000 | 5.39479e-08 | 1.000000 |
| rad67                         | 4.08464e-08 | 1.000000 | 4.08464e-08 | 1.000000 |
| rad1                          | 3.80713e-08 | 1.000000 | 3.80713e-08 | 1.000000 |
| rad11                         | 2.43263e-08 | 1.000000 | 2.43263e-08 | 1.000000 |
| PhCCH+CH3                     | 1.99601e-08 | 1.000000 | 1.99601e-08 | 1.000000 |
| PhCCCH3+H                     | 1.82620e-08 | 1.000000 | 1.82620e-08 | 1.000000 |
| rad35                         | 1.74370e-08 | 1.000000 | 1.74370e-08 | 1.000000 |
| rad19anti                     | 1.58289e-08 | 1.000000 | 1.58289e-08 | 1.000000 |
| rad45                         | 1.58174e-08 | 1.000000 | 1.58174e-08 | 1.000000 |
| Ph+MeAc                       | 1.57152e-08 | 1.000000 | 1.57152e-08 | 1.000000 |
| rad12                         | 1.53191e-08 | 1.000000 | 1.53191e-08 | 1.000000 |
| rad22                         | 1.09534e-08 | 1.000000 | 1.09534e-08 | 1.000000 |
| rad3                          | 6.85987e-09 | 1.000000 | 6.85987e-09 | 1.000000 |
| rad4                          | 3.61422e-09 | 1.000000 | 3.61422e-09 | 1.000000 |
| Ph+Allene                     | 1.53313e-09 | 1.000000 | 1.53313e-09 | 1.000000 |
| rad36                         | 1.01731e-09 | 1.000000 | 1.01731e-09 | 1.000000 |
| rad7                          | 7.54671e-10 | 1.000000 | 7.54671e-10 | 1.000000 |
| PhCH2CCH+H                    | 3.72855e-10 | 1.000000 | 3.72855e-10 | 1.000000 |
| rad30                         | 3.08876e-10 | 1.000000 | 3.08876e-10 | 1.000000 |
| PhcycC3H3_A+H                 | 1.27393e-10 | 1.000000 | 1.27393e-10 | 1.000000 |
| rad5                          | 1.19158e-10 | 1.000000 | 1.19158e-10 | 1.000000 |
| rad18                         | 8.55110e-11 | 1.000000 | 8.55110e-11 | 1.000000 |
| rad28                         | 3.05888e-11 | 1.000000 | 3.05888e-11 | 1.000000 |
| rad37                         | 1.56917e-11 | 1.000000 | 1.56917e-11 | 1.000000 |
| rad20                         | 7.12350e-12 | 1.000000 | 7.12350e-12 | 1.000000 |
| rad21                         | 4.84884e-12 | 1.000000 | 4.84884e-12 | 1.000000 |
| rad13                         | 4.84088e-12 | 1.000000 | 4.84088e-12 | 1.000000 |
| rad27                         | 3.43550e-12 | 1.000000 | 3.43550e-12 | 1.000000 |
| rad14                         | 2.93075e-12 | 1.000000 | 2.93075e-12 | 1.000000 |
| PhcycC3H3_B+H                 | 2.63830e-12 | 1.000000 | 2.63830e-12 | 1.000000 |
| Phenyl+cycC3H4                | 2.60318e-12 | 1.000000 | 0.000000    | 1.000000 |
| rad60syn                      | 1.99819e-12 | 1.000000 | 1.99819e-12 | 1.000000 |
| PAH3+H                        | 1.39998e-12 | 1.000000 | 1.39998e-12 | 1.000000 |
| PAH7+H                        | 1.38681e-12 | 1.000000 | 1.38681e-12 | 1.000000 |
| rad60anti                     | 1.01336e-12 | 1.000000 | 1.01336e-12 | 1.000000 |
| PAH9+H                        | 8.23053e-13 | 1.000000 | 8.23053e-13 | 1.000000 |
| rad25                         | 6.88615e-13 | 1.000000 | 6.88615e-13 | 1.000000 |
| rad38                         | 6.04781e-13 | 1.000000 | 6.04781e-13 | 1.000000 |
| rad59                         | 2.64003e-13 | 1.000000 | 2.64003e-13 | 1.000000 |
| PAH10+CH3                     | 9.91027e-14 | 1.000000 | 9.91027e-14 | 1.000000 |
| rad46                         | 4.17260e-14 | 1.000000 | 4.17260e-14 | 1.000000 |
| rad39                         | 1.76001e-14 | 1.000000 | 1.76001e-14 | 1.000000 |
| rad43                         | 1.23686e-14 | 1.000000 | 1.23686e-14 | 1.000000 |
| rad33                         | 6.54169e-15 | 1.000000 | 6.54169e-15 | 1.000000 |
| rad62                         | 1.70392e-15 | 1.000000 | 1.70392e-15 | 1.000000 |
| rad50                         | 6.31573e-16 | 1.000000 | 6.31573e-16 | 1.000000 |
| rad70                         | 5.65580e-16 | 1.000000 | 5.65580e-16 | 1.000000 |
| rad24                         | 4.44381e-16 | 1.000000 | 4.44381e-16 | 1.000000 |
| rad58                         | 1.36669e-16 | 1.000000 | 1.36669e-16 | 1.000000 |

|           |             |          |             |          |
|-----------|-------------|----------|-------------|----------|
| rad54     | 1.10591e-16 | 1.000000 | 1.10591e-16 | 1.000000 |
| PAH1+H    | 5.51964e-17 | 1.000000 | 5.51964e-17 | 1.000000 |
| rad31     | 3.13583e-17 | 1.000000 | 3.13583e-17 | 1.000000 |
| rad34     | 2.14556e-17 | 1.000000 | 2.14556e-17 | 1.000000 |
| rad41     | 8.01478e-18 | 1.000000 | 8.01478e-18 | 1.000000 |
| rad52     | 7.98456e-18 | 1.000000 | 7.98456e-18 | 1.000000 |
| rad51     | 4.49162e-18 | 1.000000 | 4.49162e-18 | 1.000000 |
| rad42     | 2.57046e-18 | 1.000000 | 2.57046e-18 | 1.000000 |
| rad55     | 2.04725e-18 | 1.000000 | 2.04725e-18 | 1.000000 |
| rad65     | 7.58381e-20 | 1.000000 | 7.58381e-20 | 1.000000 |
| rad61     | 1.24906e-20 | 1.000000 | 1.24906e-20 | 1.000000 |
| rad53     | 2.17673e-21 | 1.000000 | 2.17673e-21 | 1.000000 |
| rad68syn  | 4.61050e-22 | 1.000000 | 4.61050e-22 | 1.000000 |
| rad68anti | 3.37733e-22 | 1.000000 | 3.37733e-22 | 1.000000 |
| rad64     | 6.93840e-23 | 1.000000 | 6.93840e-23 | 1.000000 |
| rad56     | 5.03698e-23 | 1.000000 | 5.03698e-23 | 1.000000 |
| rad40syn  | 2.41374e-23 | 1.000000 | 2.41374e-23 | 1.000000 |
| rad40anti | 2.07325e-23 | 1.000000 | 2.07325e-23 | 1.000000 |
| rad47     | 7.57913e-24 | 1.000000 | 7.57913e-24 | 1.000000 |
| PAH8+H    | 6.52450e-24 | 1.000000 | 6.52450e-24 | 1.000000 |
| rad73     | 2.20434e-25 | 1.000000 | 2.20434e-25 | 1.000000 |
| rad19syn  | 3.32212e-26 | 1.000000 | 3.32212e-26 | 1.000000 |
| rad71     | 3.78471e-27 | 1.000000 | 3.78471e-27 | 1.000000 |
| rad8      | 2.94373e-42 | 1.000000 | 2.94373e-42 | 1.000000 |

10000.0000 Pa, 280.000000 K

| Rate constant             | True (fraction)        | Effective (fraction)   |
|---------------------------|------------------------|------------------------|
| Total                     | 3.52572e-14 (1.00 )    | 3.52572e-14 (1.00 )    |
| Formation of rad19        | 3.52244e-14 (0.999 )   | 3.52244e-14 (0.999 )   |
| H-abstraction to cyc2enyl | 3.26639e-17 (0.000926) | 3.26639e-17 (0.000926) |
| H-abstraction to cyclenyl | 9.42926e-20 (2.67e-06) | 9.42926e-20 (2.67e-06) |

| species                       | PYtrue      | Cumul    | PYeffective | Cumul    |
|-------------------------------|-------------|----------|-------------|----------|
| rad9                          | 0.939210    | 0.939210 | 0.939210    | 0.939210 |
| Indene+H                      | 0.0577973   | 0.997007 | 0.0577973   | 0.997007 |
| rad15                         | 0.00204460  | 0.999051 | 0.00204460  | 0.999051 |
| Benzene+cycloprop-2-enylidene | 0.000926445 | 0.999978 | 0.000926445 | 0.999978 |
| PhCHCCH2+H                    | 1.73944e-05 | 0.999995 | 1.73944e-05 | 0.999995 |
| Benzene+cycloprop-1-enylidene | 2.67442e-06 | 0.999998 | 2.67442e-06 | 0.999998 |
| rad6                          | 8.24067e-07 | 0.999999 | 8.24067e-07 | 0.999999 |
| rad2                          | 5.86509e-07 | 0.999999 | 5.86509e-07 | 0.999999 |
| rad26                         | 1.09181e-07 | 1.000000 | 1.09181e-07 | 1.000000 |
| C2H2+PhCH2                    | 9.94977e-08 | 1.000000 | 9.94977e-08 | 1.000000 |
| rad10                         | 6.36437e-08 | 1.000000 | 6.36437e-08 | 1.000000 |
| rad23                         | 6.32705e-08 | 1.000000 | 6.32705e-08 | 1.000000 |
| rad67                         | 4.85447e-08 | 1.000000 | 4.85447e-08 | 1.000000 |
| rad1                          | 4.37982e-08 | 1.000000 | 4.37982e-08 | 1.000000 |
| PhCCH+CH3                     | 2.68954e-08 | 1.000000 | 2.68954e-08 | 1.000000 |
| PhCCCH3+H                     | 2.44811e-08 | 1.000000 | 2.44811e-08 | 1.000000 |
| rad11                         | 2.38365e-08 | 1.000000 | 2.38365e-08 | 1.000000 |
| Ph+MeAc                       | 2.15775e-08 | 1.000000 | 2.15775e-08 | 1.000000 |
| rad35                         | 2.06432e-08 | 1.000000 | 2.06432e-08 | 1.000000 |
| rad45                         | 1.78471e-08 | 1.000000 | 1.78471e-08 | 1.000000 |
| rad19anti                     | 1.60059e-08 | 1.000000 | 1.60059e-08 | 1.000000 |
| rad12                         | 1.52326e-08 | 1.000000 | 1.52326e-08 | 1.000000 |
| rad22                         | 1.07935e-08 | 1.000000 | 1.07935e-08 | 1.000000 |
| rad3                          | 7.85621e-09 | 1.000000 | 7.85621e-09 | 1.000000 |
| rad4                          | 4.15544e-09 | 1.000000 | 4.15544e-09 | 1.000000 |
| Ph+Allene                     | 1.96534e-09 | 1.000000 | 1.96534e-09 | 1.000000 |
| rad36                         | 1.15594e-09 | 1.000000 | 1.15594e-09 | 1.000000 |
| rad7                          | 8.78780e-10 | 1.000000 | 8.78780e-10 | 1.000000 |
| PhCH2CCH+H                    | 4.92190e-10 | 1.000000 | 4.92190e-10 | 1.000000 |
| rad30                         | 3.67784e-10 | 1.000000 | 3.67784e-10 | 1.000000 |
| PhcycC3H3_A+H                 | 1.70157e-10 | 1.000000 | 1.70157e-10 | 1.000000 |
| rad5                          | 1.33799e-10 | 1.000000 | 1.33799e-10 | 1.000000 |
| rad18                         | 8.10402e-11 | 1.000000 | 8.10402e-11 | 1.000000 |
| rad28                         | 4.23522e-11 | 1.000000 | 4.23522e-11 | 1.000000 |
| rad37                         | 2.23294e-11 | 1.000000 | 2.23294e-11 | 1.000000 |
| rad20                         | 6.77699e-12 | 1.000000 | 6.77699e-12 | 1.000000 |
| rad13                         | 5.55684e-12 | 1.000000 | 5.55684e-12 | 1.000000 |
| rad21                         | 4.61055e-12 | 1.000000 | 4.61055e-12 | 1.000000 |
| PhcycC3H3_B+H                 | 4.07161e-12 | 1.000000 | 4.07161e-12 | 1.000000 |
| rad27                         | 3.85582e-12 | 1.000000 | 3.85582e-12 | 1.000000 |
| Phenyl+cycC3H4                | 3.74739e-12 | 1.000000 | 0.000000    | 1.000000 |
| rad14                         | 3.34147e-12 | 1.000000 | 3.34147e-12 | 1.000000 |
| rad60syn                      | 2.48285e-12 | 1.000000 | 2.48285e-12 | 1.000000 |
| PAH7+H                        | 1.86658e-12 | 1.000000 | 1.86658e-12 | 1.000000 |

|           |             |         |             |         |
|-----------|-------------|---------|-------------|---------|
| PAH3+H    | 1.83125e-12 | 1.00000 | 1.83125e-12 | 1.00000 |
| rad60anti | 1.26380e-12 | 1.00000 | 1.26380e-12 | 1.00000 |
| PAH9+H    | 1.16771e-12 | 1.00000 | 1.16771e-12 | 1.00000 |
| rad38     | 8.44550e-13 | 1.00000 | 8.44550e-13 | 1.00000 |
| rad25     | 6.69497e-13 | 1.00000 | 6.69497e-13 | 1.00000 |
| rad59     | 3.42325e-13 | 1.00000 | 3.42325e-13 | 1.00000 |
| PAH10+CH3 | 1.61770e-13 | 1.00000 | 1.61770e-13 | 1.00000 |
| rad46     | 5.87168e-14 | 1.00000 | 5.87168e-14 | 1.00000 |
| rad39     | 3.07419e-14 | 1.00000 | 3.07419e-14 | 1.00000 |
| rad43     | 1.93381e-14 | 1.00000 | 1.93381e-14 | 1.00000 |
| rad33     | 7.51911e-15 | 1.00000 | 7.51911e-15 | 1.00000 |
| rad62     | 2.71078e-15 | 1.00000 | 2.71078e-15 | 1.00000 |
| rad50     | 9.71193e-16 | 1.00000 | 9.71193e-16 | 1.00000 |
| rad70     | 8.63046e-16 | 1.00000 | 8.63046e-16 | 1.00000 |
| rad24     | 4.98511e-16 | 1.00000 | 4.98511e-16 | 1.00000 |
| rad58     | 2.04555e-16 | 1.00000 | 2.04555e-16 | 1.00000 |
| rad54     | 1.88232e-16 | 1.00000 | 1.88232e-16 | 1.00000 |
| PAH1+H    | 1.00388e-16 | 1.00000 | 1.00388e-16 | 1.00000 |
| rad31     | 4.00599e-17 | 1.00000 | 4.00599e-17 | 1.00000 |
| rad34     | 3.47353e-17 | 1.00000 | 3.47353e-17 | 1.00000 |
| rad41     | 1.45150e-17 | 1.00000 | 1.45150e-17 | 1.00000 |
| rad52     | 1.29585e-17 | 1.00000 | 1.29585e-17 | 1.00000 |
| rad51     | 7.68473e-18 | 1.00000 | 7.68473e-18 | 1.00000 |
| rad42     | 4.61122e-18 | 1.00000 | 4.61122e-18 | 1.00000 |
| rad55     | 3.66580e-18 | 1.00000 | 3.66580e-18 | 1.00000 |
| rad65     | 1.37323e-19 | 1.00000 | 1.37323e-19 | 1.00000 |
| rad61     | 2.84739e-20 | 1.00000 | 2.84739e-20 | 1.00000 |
| rad53     | 4.66583e-21 | 1.00000 | 4.66583e-21 | 1.00000 |
| rad68syn  | 1.01439e-21 | 1.00000 | 1.01439e-21 | 1.00000 |
| rad68anti | 7.40299e-22 | 1.00000 | 7.40299e-22 | 1.00000 |
| rad64     | 1.69801e-22 | 1.00000 | 1.69801e-22 | 1.00000 |
| rad56     | 1.21511e-22 | 1.00000 | 1.21511e-22 | 1.00000 |
| rad40syn  | 6.10893e-23 | 1.00000 | 6.10893e-23 | 1.00000 |
| rad40anti | 5.26428e-23 | 1.00000 | 5.26428e-23 | 1.00000 |
| PAH8+H    | 1.75109e-23 | 1.00000 | 1.75109e-23 | 1.00000 |
| rad47     | 1.00840e-23 | 1.00000 | 1.00840e-23 | 1.00000 |
| rad73     | 5.78154e-25 | 1.00000 | 5.78154e-25 | 1.00000 |
| rad19syn  | 1.50750e-25 | 1.00000 | 1.50750e-25 | 1.00000 |
| rad71     | 1.07360e-26 | 1.00000 | 1.07360e-26 | 1.00000 |
| rad8      | 4.79041e-42 | 1.00000 | 4.79041e-42 | 1.00000 |

10000.0000 Pa, 290.000000 K

```

=====
Rate constant      | True (fraction)      Effective (fraction)
-----
Total              | 3.81171e-14 (1.00   ) 3.81171e-14 (1.00   )
Formation of rad19| 3.80733e-14 (0.999  ) 3.80733e-14 (0.999  )
H-abstraction to cyc2enyl| 4.36868e-17 (0.00115) 4.36868e-17 (0.00115)
H-abstraction to cyclenyl| 1.56861e-19 (4.12e-06) 1.56861e-19 (4.12e-06)

```

| species                       | PYtrue      | Cumul    | PYeffective | Cumul    |
|-------------------------------|-------------|----------|-------------|----------|
| rad9                          | 0.934677    | 0.934677 | 0.934677    | 0.934677 |
| Indene+H                      | 0.0621265   | 0.996803 | 0.0621265   | 0.996803 |
| rad15                         | 0.00202420  | 0.998827 | 0.00202420  | 0.998827 |
| Benzene+cycloprop-2-enylidene | 0.00114612  | 0.999973 | 0.00114612  | 0.999973 |
| PhCHCCH2+H                    | 2.01483e-05 | 0.999994 | 2.01483e-05 | 0.999994 |
| Benzene+cycloprop-1-enylidene | 4.11523e-06 | 0.999998 | 4.11523e-06 | 0.999998 |
| rad6                          | 9.62744e-07 | 0.999999 | 9.62744e-07 | 0.999999 |
| rad2                          | 6.65130e-07 | 0.999999 | 6.65130e-07 | 0.999999 |
| rad26                         | 1.26757e-07 | 0.999999 | 1.26757e-07 | 0.999999 |
| C2H2+PhCH2                    | 1.18915e-07 | 1.000000 | 1.18915e-07 | 1.000000 |
| rad10                         | 7.48309e-08 | 1.000000 | 7.48309e-08 | 1.000000 |
| rad23                         | 7.29203e-08 | 1.000000 | 7.29203e-08 | 1.000000 |
| rad67                         | 5.78719e-08 | 1.000000 | 5.78719e-08 | 1.000000 |
| rad1                          | 5.04168e-08 | 1.000000 | 5.04168e-08 | 1.000000 |
| PhCCH+CH3                     | 3.61585e-08 | 1.000000 | 3.61585e-08 | 1.000000 |
| PhCCCH3+H                     | 3.28444e-08 | 1.000000 | 3.28444e-08 | 1.000000 |
| Ph+MeAc                       | 2.96414e-08 | 1.000000 | 2.96414e-08 | 1.000000 |
| rad35                         | 2.45134e-08 | 1.000000 | 2.45134e-08 | 1.000000 |
| rad11                         | 2.33487e-08 | 1.000000 | 2.33487e-08 | 1.000000 |
| rad45                         | 2.01789e-08 | 1.000000 | 2.01789e-08 | 1.000000 |
| rad19anti                     | 1.62598e-08 | 1.000000 | 1.62598e-08 | 1.000000 |
| rad12                         | 1.51670e-08 | 1.000000 | 1.51670e-08 | 1.000000 |
| rad22                         | 1.06239e-08 | 1.000000 | 1.06239e-08 | 1.000000 |
| rad3                          | 8.98004e-09 | 1.000000 | 8.98004e-09 | 1.000000 |
| rad4                          | 4.77003e-09 | 1.000000 | 4.77003e-09 | 1.000000 |
| Ph+Allene                     | 2.52732e-09 | 1.000000 | 2.52732e-09 | 1.000000 |
| rad36                         | 1.31702e-09 | 1.000000 | 1.31702e-09 | 1.000000 |
| rad7                          | 1.02479e-09 | 1.000000 | 1.02479e-09 | 1.000000 |

|                |             |         |             |         |
|----------------|-------------|---------|-------------|---------|
| PhCH2CCH+H     | 6.51645e-10 | 1.00000 | 6.51645e-10 | 1.00000 |
| rad30          | 4.39391e-10 | 1.00000 | 4.39391e-10 | 1.00000 |
| PhcycC3H3_A+H  | 2.26886e-10 | 1.00000 | 2.26886e-10 | 1.00000 |
| rad5           | 1.49415e-10 | 1.00000 | 1.49415e-10 | 1.00000 |
| rad18          | 7.69330e-11 | 1.00000 | 7.69330e-11 | 1.00000 |
| rad28          | 5.87428e-11 | 1.00000 | 5.87428e-11 | 1.00000 |
| rad37          | 3.19026e-11 | 1.00000 | 3.19026e-11 | 1.00000 |
| rad20          | 6.45631e-12 | 1.00000 | 6.45631e-12 | 1.00000 |
| rad13          | 6.39450e-12 | 1.00000 | 6.39450e-12 | 1.00000 |
| PhcycC3H3_B+H  | 6.20719e-12 | 1.00000 | 6.20719e-12 | 1.00000 |
| Phenyl+cycC3H4 | 5.36582e-12 | 1.00000 | 0.00000     | 1.00000 |
| rad21          | 4.39025e-12 | 1.00000 | 4.39025e-12 | 1.00000 |
| rad27          | 4.32865e-12 | 1.00000 | 4.32865e-12 | 1.00000 |
| rad14          | 3.80289e-12 | 1.00000 | 3.80289e-12 | 1.00000 |
| rad60syn       | 3.09770e-12 | 1.00000 | 3.09770e-12 | 1.00000 |
| PAH7+H         | 2.52961e-12 | 1.00000 | 2.52961e-12 | 1.00000 |
| PAH3+H         | 2.40589e-12 | 1.00000 | 2.40589e-12 | 1.00000 |
| PAH9+H         | 1.66057e-12 | 1.00000 | 1.66057e-12 | 1.00000 |
| rad60anti      | 1.58265e-12 | 1.00000 | 1.58265e-12 | 1.00000 |
| rad38          | 1.18679e-12 | 1.00000 | 1.18679e-12 | 1.00000 |
| rad25          | 6.50918e-13 | 1.00000 | 6.50918e-13 | 1.00000 |
| rad59          | 4.45782e-13 | 1.00000 | 4.45782e-13 | 1.00000 |
| PAH10+CH3      | 2.63777e-13 | 1.00000 | 2.63777e-13 | 1.00000 |
| rad46          | 8.30384e-14 | 1.00000 | 8.30384e-14 | 1.00000 |
| rad39          | 5.34810e-14 | 1.00000 | 5.34810e-14 | 1.00000 |
| rad43          | 3.01252e-14 | 1.00000 | 3.01252e-14 | 1.00000 |
| rad33          | 8.66883e-15 | 1.00000 | 8.66883e-15 | 1.00000 |
| rad62          | 4.27848e-15 | 1.00000 | 4.27848e-15 | 1.00000 |
| rad50          | 1.49875e-15 | 1.00000 | 1.49875e-15 | 1.00000 |
| rad70          | 1.31448e-15 | 1.00000 | 1.31448e-15 | 1.00000 |
| rad24          | 5.61089e-16 | 1.00000 | 5.61089e-16 | 1.00000 |
| rad54          | 3.19115e-16 | 1.00000 | 3.19115e-16 | 1.00000 |
| rad58          | 3.06180e-16 | 1.00000 | 3.06180e-16 | 1.00000 |
| PAH1+H         | 1.80517e-16 | 1.00000 | 1.80517e-16 | 1.00000 |
| rad34          | 5.59073e-17 | 1.00000 | 5.59073e-17 | 1.00000 |
| rad31          | 5.16782e-17 | 1.00000 | 5.16782e-17 | 1.00000 |
| rad41          | 2.58900e-17 | 1.00000 | 2.58900e-17 | 1.00000 |
| rad52          | 2.10544e-17 | 1.00000 | 2.10544e-17 | 1.00000 |
| rad51          | 1.31175e-17 | 1.00000 | 1.31175e-17 | 1.00000 |
| rad42          | 8.13410e-18 | 1.00000 | 8.13410e-18 | 1.00000 |
| rad55          | 6.50836e-18 | 1.00000 | 6.50836e-18 | 1.00000 |
| rad65          | 2.46505e-19 | 1.00000 | 2.46505e-19 | 1.00000 |
| rad61          | 6.21860e-20 | 1.00000 | 6.21860e-20 | 1.00000 |
| rad53          | 9.69216e-21 | 1.00000 | 9.69216e-21 | 1.00000 |
| rad68syn       | 2.13810e-21 | 1.00000 | 2.13810e-21 | 1.00000 |
| rad68anti      | 1.55539e-21 | 1.00000 | 1.55539e-21 | 1.00000 |
| rad64          | 3.95975e-22 | 1.00000 | 3.95975e-22 | 1.00000 |
| rad56          | 2.78536e-22 | 1.00000 | 2.78536e-22 | 1.00000 |
| rad40syn       | 1.45386e-22 | 1.00000 | 1.45386e-22 | 1.00000 |
| rad40anti      | 1.25666e-22 | 1.00000 | 1.25666e-22 | 1.00000 |
| PAH8+H         | 4.37882e-23 | 1.00000 | 4.37882e-23 | 1.00000 |
| rad47          | 1.36641e-23 | 1.00000 | 1.36641e-23 | 1.00000 |
| rad73          | 1.42551e-24 | 1.00000 | 1.42551e-24 | 1.00000 |
| rad19syn       | 7.03943e-25 | 1.00000 | 7.03943e-25 | 1.00000 |
| rad71          | 2.82717e-26 | 1.00000 | 2.82717e-26 | 1.00000 |
| rad8           | 8.51800e-42 | 1.00000 | 8.51800e-42 | 1.00000 |

10000.0000 Pa, 300.000000 K

=====

| Rate constant             | True (fraction)        | Effective (fraction)   |
|---------------------------|------------------------|------------------------|
| Total                     | 5.34809e-14 (1.00 )    | 5.34809e-14 (1.00 )    |
| Formation of rad19        | 5.34010e-14 (0.999 )   | 5.34010e-14 (0.999 )   |
| H-abstraction to cyc2enyl | 7.95823e-17 (0.00149 ) | 7.95823e-17 (0.00149 ) |
| H-abstraction to cyc1enyl | 3.44981e-19 (6.45e-06) | 3.44981e-19 (6.45e-06) |

| species                       | PYtrue      | Cumul    | PYeffective | Cumul    |
|-------------------------------|-------------|----------|-------------|----------|
| rad9                          | 0.905780    | 0.905780 | 0.905780    | 0.905780 |
| Indene+H                      | 0.0907095   | 0.996490 | 0.0907095   | 0.996490 |
| rad15                         | 0.00197029  | 0.998460 | 0.00197029  | 0.998460 |
| Benzene+cycloprop-2-enylidene | 0.00148805  | 0.999948 | 0.00148805  | 0.999948 |
| PhCHCCH2+H                    | 4.01206e-05 | 0.999988 | 4.01206e-05 | 0.999988 |
| Benzene+cycloprop-1-enylidene | 6.45054e-06 | 0.999995 | 6.45054e-06 | 0.999995 |
| rad6                          | 2.19178e-06 | 0.999997 | 2.19178e-06 | 0.999997 |
| rad2                          | 1.10347e-06 | 0.999998 | 1.10347e-06 | 0.999998 |
| C2H2+PhCH2                    | 3.12126e-07 | 0.999998 | 3.12126e-07 | 0.999998 |
| rad26                         | 2.70116e-07 | 0.999999 | 2.70116e-07 | 0.999999 |
| PhCCH+CH3                     | 1.70822e-07 | 0.999999 | 1.70822e-07 | 0.999999 |
| Ph+MeAc                       | 1.59512e-07 | 0.999999 | 1.59512e-07 | 0.999999 |

|                |             |          |             |          |
|----------------|-------------|----------|-------------|----------|
| PhCCCH3+H      | 1.54556e-07 | 0.999999 | 1.54556e-07 | 0.999999 |
| rad67          | 1.42668e-07 | 0.999999 | 1.42668e-07 | 0.999999 |
| rad10          | 1.33093e-07 | 0.999999 | 1.33093e-07 | 0.999999 |
| rad23          | 1.30870e-07 | 0.999999 | 1.30870e-07 | 0.999999 |
| rad1           | 8.34587e-08 | 1.000000 | 8.34587e-08 | 1.000000 |
| rad35          | 5.83387e-08 | 1.000000 | 5.83387e-08 | 1.000000 |
| rad45          | 3.75738e-08 | 1.000000 | 3.75738e-08 | 1.000000 |
| rad19anti      | 2.18741e-08 | 1.000000 | 2.18741e-08 | 1.000000 |
| rad12          | 2.01254e-08 | 1.000000 | 2.01254e-08 | 1.000000 |
| rad11          | 1.98529e-08 | 1.000000 | 1.98529e-08 | 1.000000 |
| rad3           | 1.51897e-08 | 1.000000 | 1.51897e-08 | 1.000000 |
| rad22          | 1.08150e-08 | 1.000000 | 1.08150e-08 | 1.000000 |
| Ph+Allene      | 7.59902e-09 | 1.000000 | 7.59902e-09 | 1.000000 |
| rad4           | 7.59013e-09 | 1.000000 | 7.59013e-09 | 1.000000 |
| PhCH2CCH+H     | 3.02101e-09 | 1.000000 | 3.02101e-09 | 1.000000 |
| rad7           | 2.26261e-09 | 1.000000 | 2.26261e-09 | 1.000000 |
| rad36          | 1.28232e-09 | 1.000000 | 1.28232e-09 | 1.000000 |
| rad30          | 1.05287e-09 | 1.000000 | 1.05287e-09 | 1.000000 |
| rad28          | 4.06644e-10 | 1.000000 | 4.06644e-10 | 1.000000 |
| PhcycC3H3_A+H  | 3.25285e-10 | 1.000000 | 3.25285e-10 | 1.000000 |
| rad37          | 2.98937e-10 | 1.000000 | 2.98937e-10 | 1.000000 |
| rad5           | 2.20979e-10 | 1.000000 | 2.20979e-10 | 1.000000 |
| rad18          | 7.52656e-11 | 1.000000 | 7.52656e-11 | 1.000000 |
| PAH7+H         | 2.11018e-11 | 1.000000 | 2.11018e-11 | 1.000000 |
| PAH9+H         | 1.59003e-11 | 1.000000 | 1.59003e-11 | 1.000000 |
| rad13          | 1.29498e-11 | 1.000000 | 1.29498e-11 | 1.000000 |
| PAH3+H         | 1.11902e-11 | 1.000000 | 1.11902e-11 | 1.000000 |
| PhcycC3H3_B+H  | 1.09019e-11 | 1.000000 | 1.09019e-11 | 1.000000 |
| rad38          | 1.01629e-11 | 1.000000 | 1.01629e-11 | 1.000000 |
| rad60syn       | 9.49394e-12 | 1.000000 | 9.49394e-12 | 1.000000 |
| Phenyl+cycC3H4 | 8.21025e-12 | 1.000000 | 0.000000    | 1.000000 |
| rad27          | 6.91001e-12 | 1.000000 | 6.91001e-12 | 1.000000 |
| PAH10+CH3      | 6.84349e-12 | 1.000000 | 6.84349e-12 | 1.000000 |
| rad14          | 5.92058e-12 | 1.000000 | 5.92058e-12 | 1.000000 |
| rad20          | 5.45605e-12 | 1.000000 | 5.45605e-12 | 1.000000 |
| rad60anti      | 4.98013e-12 | 1.000000 | 4.98013e-12 | 1.000000 |
| rad21          | 3.87530e-12 | 1.000000 | 3.87530e-12 | 1.000000 |
| rad39          | 2.52270e-12 | 1.000000 | 2.52270e-12 | 1.000000 |
| rad59          | 1.82252e-12 | 1.000000 | 1.82252e-12 | 1.000000 |
| rad46          | 7.42517e-13 | 1.000000 | 7.42517e-13 | 1.000000 |
| rad25          | 6.02667e-13 | 1.000000 | 6.02667e-13 | 1.000000 |
| rad43          | 3.65103e-13 | 1.000000 | 3.65103e-13 | 1.000000 |
| rad62          | 5.26431e-14 | 1.000000 | 5.26431e-14 | 1.000000 |
| rad50          | 2.83240e-14 | 1.000000 | 2.83240e-14 | 1.000000 |
| rad33          | 1.96921e-14 | 1.000000 | 1.96921e-14 | 1.000000 |
| rad70          | 1.40613e-14 | 1.000000 | 1.40613e-14 | 1.000000 |
| rad54          | 1.29251e-14 | 1.000000 | 1.29251e-14 | 1.000000 |
| PAH1+H         | 6.14170e-15 | 1.000000 | 6.14170e-15 | 1.000000 |
| rad58          | 2.71816e-15 | 1.000000 | 2.71816e-15 | 1.000000 |
| rad24          | 1.16327e-15 | 1.000000 | 1.16327e-15 | 1.000000 |
| rad34          | 8.77863e-16 | 1.000000 | 8.77863e-16 | 1.000000 |
| rad41          | 7.89812e-16 | 1.000000 | 7.89812e-16 | 1.000000 |
| rad52          | 6.44355e-16 | 1.000000 | 6.44355e-16 | 1.000000 |
| rad51          | 5.94806e-16 | 1.000000 | 5.94806e-16 | 1.000000 |
| rad55          | 3.67319e-16 | 1.000000 | 3.67319e-16 | 1.000000 |
| rad31          | 2.54765e-16 | 1.000000 | 2.54765e-16 | 1.000000 |
| rad42          | 2.08379e-16 | 1.000000 | 2.08379e-16 | 1.000000 |
| rad61          | 2.10657e-17 | 1.000000 | 2.10657e-17 | 1.000000 |
| rad65          | 1.61964e-17 | 1.000000 | 1.61964e-17 | 1.000000 |
| rad53          | 2.88009e-18 | 1.000000 | 2.88009e-18 | 1.000000 |
| rad64          | 7.35395e-19 | 1.000000 | 7.35395e-19 | 1.000000 |
| rad56          | 3.65138e-19 | 1.000000 | 3.65138e-19 | 1.000000 |
| rad68syn       | 3.27117e-19 | 1.000000 | 3.27117e-19 | 1.000000 |
| rad68anti      | 2.28309e-19 | 1.000000 | 2.28309e-19 | 1.000000 |
| rad19syn       | 1.12973e-19 | 1.000000 | 1.12973e-19 | 1.000000 |
| rad40syn       | 8.65048e-20 | 1.000000 | 8.65048e-20 | 1.000000 |
| PAH8+H         | 8.27537e-20 | 1.000000 | 8.27537e-20 | 1.000000 |
| rad40anti      | 7.43217e-20 | 1.000000 | 7.43217e-20 | 1.000000 |
| rad73          | 7.80111e-21 | 1.000000 | 7.80111e-21 | 1.000000 |
| rad71          | 1.28343e-21 | 1.000000 | 1.28343e-21 | 1.000000 |
| rad47          | 1.76621e-22 | 1.000000 | 1.76621e-22 | 1.000000 |
| rad72          | 1.06415e-25 | 1.000000 | 1.06415e-25 | 1.000000 |
| rad8           | 2.31148e-32 | 1.000000 | 2.31148e-32 | 1.000000 |

10000.0000 Pa, 310.000000 K

=====

| Rate constant      | True (fraction)      | Effective (fraction) |
|--------------------|----------------------|----------------------|
| Total              | 5.92544e-14 (1.00 )  | 5.92544e-14 (1.00 )  |
| Formation of rad19 | 5.91462e-14 (0.998 ) | 5.91462e-14 (0.998 ) |

H-abstraction to cyc2enyl | 1.07628e-16 (0.00182 ) 1.07628e-16 (0.00182 )  
H-abstraction to cyclenyl | 5.62537e-19 (9.49e-06) 5.62537e-19 (9.49e-06)

| species                       | PYtrue      | Cumul    | PYeffective | Cumul    |
|-------------------------------|-------------|----------|-------------|----------|
| rad9                          | 0.924327    | 0.924327 | 0.924327    | 0.924327 |
| Indene+H                      | 0.0718339   | 0.996161 | 0.0718339   | 0.996161 |
| rad15                         | 0.00198237  | 0.998143 | 0.00198237  | 0.998143 |
| Benzene+cycloprop-2-enylidene | 0.00181637  | 0.999960 | 0.00181637  | 0.999960 |
| PhCHCCH2+H                    | 2.72350e-05 | 0.999987 | 2.72350e-05 | 0.999987 |
| Benzene+cycloprop-1-enylidene | 9.49359e-06 | 0.999997 | 9.49359e-06 | 0.999997 |
| rad6                          | 1.32139e-06 | 0.999998 | 1.32139e-06 | 0.999998 |
| rad2                          | 8.52398e-07 | 0.999999 | 8.52398e-07 | 0.999999 |
| rad26                         | 1.71823e-07 | 0.999999 | 1.71823e-07 | 0.999999 |
| C2H2+PhCH2                    | 1.71245e-07 | 0.999999 | 1.71245e-07 | 0.999999 |
| rad10                         | 1.02200e-07 | 0.999999 | 1.02200e-07 | 0.999999 |
| rad23                         | 9.67489e-08 | 0.999999 | 9.67489e-08 | 0.999999 |
| rad67                         | 8.29009e-08 | 0.999999 | 8.29009e-08 | 0.999999 |
| rad1                          | 6.67823e-08 | 0.999999 | 6.67823e-08 | 0.999999 |
| PhCCH+CH3                     | 6.46885e-08 | 1.000000 | 6.46885e-08 | 1.000000 |
| PhCCCH3+H                     | 5.89767e-08 | 1.000000 | 5.89767e-08 | 1.000000 |
| Ph+MeAc                       | 5.57170e-08 | 1.000000 | 5.57170e-08 | 1.000000 |
| rad35                         | 3.48398e-08 | 1.000000 | 3.48398e-08 | 1.000000 |
| rad45                         | 2.59208e-08 | 1.000000 | 2.59208e-08 | 1.000000 |
| rad11                         | 2.23975e-08 | 1.000000 | 2.23975e-08 | 1.000000 |
| rad19anti                     | 1.70386e-08 | 1.000000 | 1.70386e-08 | 1.000000 |
| rad12                         | 1.50959e-08 | 1.000000 | 1.50959e-08 | 1.000000 |
| rad3                          | 1.16469e-08 | 1.000000 | 1.16469e-08 | 1.000000 |
| rad22                         | 1.02641e-08 | 1.000000 | 1.02641e-08 | 1.000000 |
| rad4                          | 6.24514e-09 | 1.000000 | 6.24514e-09 | 1.000000 |
| Ph+Allene                     | 4.20830e-09 | 1.000000 | 4.20830e-09 | 1.000000 |
| rad36                         | 1.72129e-09 | 1.000000 | 1.72129e-09 | 1.000000 |
| rad7                          | 1.39921e-09 | 1.000000 | 1.39921e-09 | 1.000000 |
| PhCH2CCH+H                    | 1.14849e-09 | 1.000000 | 1.14849e-09 | 1.000000 |
| rad30                         | 6.32641e-10 | 1.000000 | 6.32641e-10 | 1.000000 |
| PhcycC3H3_A+H                 | 4.00017e-10 | 1.000000 | 4.00017e-10 | 1.000000 |
| rad5                          | 1.83000e-10 | 1.000000 | 1.83000e-10 | 1.000000 |
| rad28                         | 1.13107e-10 | 1.000000 | 1.13107e-10 | 1.000000 |
| rad18                         | 6.96459e-11 | 1.000000 | 6.96459e-11 | 1.000000 |
| rad37                         | 6.54682e-11 | 1.000000 | 6.54682e-11 | 1.000000 |
| PhcycC3H3_B+H                 | 1.38864e-11 | 1.000000 | 1.38864e-11 | 1.000000 |
| Phenyl+cycC3H4                | 1.07882e-11 | 1.000000 | 0.00000     | 1.000000 |
| rad13                         | 8.52374e-12 | 1.000000 | 8.52374e-12 | 1.000000 |
| rad20                         | 5.88554e-12 | 1.000000 | 5.88554e-12 | 1.000000 |
| rad27                         | 5.44635e-12 | 1.000000 | 5.44635e-12 | 1.000000 |
| rad14                         | 4.89162e-12 | 1.000000 | 4.89162e-12 | 1.000000 |
| rad60syn                      | 4.87019e-12 | 1.000000 | 4.87019e-12 | 1.000000 |
| PAH7+H                        | 4.73296e-12 | 1.000000 | 4.73296e-12 | 1.000000 |
| PAH3+H                        | 4.19129e-12 | 1.000000 | 4.19129e-12 | 1.000000 |
| rad21                         | 3.99880e-12 | 1.000000 | 3.99880e-12 | 1.000000 |
| PAH9+H                        | 3.36539e-12 | 1.000000 | 3.36539e-12 | 1.000000 |
| rad60anti                     | 2.50682e-12 | 1.000000 | 2.50682e-12 | 1.000000 |
| rad38                         | 2.37395e-12 | 1.000000 | 2.37395e-12 | 1.000000 |
| rad59                         | 7.62950e-13 | 1.000000 | 7.62950e-13 | 1.000000 |
| PAH10+CH3                     | 6.90368e-13 | 1.000000 | 6.90368e-13 | 1.000000 |
| rad25                         | 6.15711e-13 | 1.000000 | 6.15711e-13 | 1.000000 |
| rad46                         | 1.67616e-13 | 1.000000 | 1.67616e-13 | 1.000000 |
| rad39                         | 1.57695e-13 | 1.000000 | 1.57695e-13 | 1.000000 |
| rad43                         | 7.16907e-14 | 1.000000 | 7.16907e-14 | 1.000000 |
| rad33                         | 1.16180e-14 | 1.000000 | 1.16180e-14 | 1.000000 |
| rad62                         | 1.03445e-14 | 1.000000 | 1.03445e-14 | 1.000000 |
| rad50                         | 3.57198e-15 | 1.000000 | 3.57198e-15 | 1.000000 |
| rad70                         | 3.00949e-15 | 1.000000 | 3.00949e-15 | 1.000000 |
| rad54                         | 8.94738e-16 | 1.000000 | 8.94738e-16 | 1.000000 |
| rad24                         | 7.16920e-16 | 1.000000 | 7.16920e-16 | 1.000000 |
| rad58                         | 6.80700e-16 | 1.000000 | 6.80700e-16 | 1.000000 |
| PAH1+H                        | 5.57027e-16 | 1.000000 | 5.57027e-16 | 1.000000 |
| rad34                         | 1.41133e-16 | 1.000000 | 1.41133e-16 | 1.000000 |
| rad31                         | 8.86429e-17 | 1.000000 | 8.86429e-17 | 1.000000 |
| rad41                         | 7.80185e-17 | 1.000000 | 7.80185e-17 | 1.000000 |
| rad52                         | 5.50888e-17 | 1.000000 | 5.50888e-17 | 1.000000 |
| rad51                         | 3.74357e-17 | 1.000000 | 3.74357e-17 | 1.000000 |
| rad42                         | 2.39219e-17 | 1.000000 | 2.39219e-17 | 1.000000 |
| rad55                         | 1.97314e-17 | 1.000000 | 1.97314e-17 | 1.000000 |
| rad65                         | 7.63899e-19 | 1.000000 | 7.63899e-19 | 1.000000 |
| rad61                         | 2.61093e-19 | 1.000000 | 2.61093e-19 | 1.000000 |
| rad53                         | 3.78118e-20 | 1.000000 | 3.78118e-20 | 1.000000 |
| rad68syn                      | 8.38267e-21 | 1.000000 | 8.38267e-21 | 1.000000 |
| rad68anti                     | 6.06744e-21 | 1.000000 | 6.06744e-21 | 1.000000 |
| rad64                         | 1.86659e-21 | 1.000000 | 1.86659e-21 | 1.000000 |

|           |             |          |             |          |
|-----------|-------------|----------|-------------|----------|
| rad56     | 1.26302e-21 | 1.000000 | 1.26302e-21 | 1.000000 |
| rad40syn  | 6.95193e-22 | 1.000000 | 6.95193e-22 | 1.000000 |
| rad40anti | 6.04245e-22 | 1.000000 | 6.04245e-22 | 1.000000 |
| PAH8+H    | 2.26323e-22 | 1.000000 | 2.26323e-22 | 1.000000 |
| rad47     | 2.66379e-23 | 1.000000 | 2.66379e-23 | 1.000000 |
| rad19syn  | 1.63881e-23 | 1.000000 | 1.63881e-23 | 1.000000 |
| rad73     | 7.30314e-24 | 1.000000 | 7.30314e-24 | 1.000000 |
| rad71     | 1.60618e-25 | 1.000000 | 1.60618e-25 | 1.000000 |
| rad8      | 3.81400e-41 | 1.000000 | 3.81400e-41 | 1.000000 |

10000.0000 Pa, 400.000000 K

| Rate constant             | True (fraction)        | Effective (fraction)   |
|---------------------------|------------------------|------------------------|
| Total                     | 1.29463e-13 (1.00 )    | 1.29463e-13 (1.00 )    |
| Formation of rad19        | 1.28526e-13 (0.993 )   | 1.28526e-13 (0.993 )   |
| H-abstraction to cyc2enyl | 9.19357e-16 (0.00710 ) | 9.19357e-16 (0.00710 ) |
| H-abstraction to cyclenyl | 1.69485e-17 (0.000131) | 1.69485e-17 (0.000131) |

| species                       | PYtrue      | Cumul    | PYeffective | Cumul    |
|-------------------------------|-------------|----------|-------------|----------|
| rad9                          | 0.796589    | 0.796589 | 0.796589    | 0.796589 |
| Indene+H                      | 0.194254    | 0.990843 | 0.194254    | 0.990843 |
| Benzene+cycloprop-2-enylidene | 0.00710133  | 0.997944 | 0.00710133  | 0.997944 |
| rad15                         | 0.00167193  | 0.999616 | 0.00167193  | 0.999616 |
| PhCHCCH2+H                    | 0.000224080 | 0.999840 | 0.000224080 | 0.999840 |
| Benzene+cycloprop-1-enylidene | 0.000130914 | 0.999971 | 0.000130914 | 0.999971 |
| rad6                          | 1.25061e-05 | 0.999984 | 1.25061e-05 | 0.999984 |
| rad2                          | 2.72623e-06 | 0.999986 | 2.72623e-06 | 0.999986 |
| Ph+MeAc                       | 2.53571e-06 | 0.999989 | 2.53571e-06 | 0.999989 |
| C2H2+PhCH2                    | 2.45820e-06 | 0.999991 | 2.45820e-06 | 0.999991 |
| PhCCCH3+H                     | 2.03771e-06 | 0.999993 | 2.03771e-06 | 0.999993 |
| PhCCH+CH3                     | 1.90995e-06 | 0.999995 | 1.90995e-06 | 0.999995 |
| rad26                         | 1.20789e-06 | 0.999996 | 1.20789e-06 | 0.999996 |
| rad67                         | 1.08182e-06 | 0.999997 | 1.08182e-06 | 0.999997 |
| rad23                         | 4.48941e-07 | 0.999998 | 4.48941e-07 | 0.999998 |
| rad35                         | 4.24062e-07 | 0.999998 | 4.24062e-07 | 0.999998 |
| rad10                         | 3.72686e-07 | 0.999999 | 3.72686e-07 | 0.999999 |
| rad19anti                     | 2.57284e-07 | 0.999999 | 2.57284e-07 | 0.999999 |
| rad1                          | 2.54486e-07 | 0.999999 | 2.54486e-07 | 0.999999 |
| Ph+Allene                     | 1.50398e-07 | 0.999999 | 1.50398e-07 | 0.999999 |
| rad45                         | 1.34574e-07 | 1.000000 | 1.34574e-07 | 1.000000 |
| PhCH2CCH+H                    | 6.87845e-08 | 1.000000 | 6.87845e-08 | 1.000000 |
| rad3                          | 3.76847e-08 | 1.000000 | 3.76847e-08 | 1.000000 |
| rad12                         | 2.60744e-08 | 1.000000 | 2.60744e-08 | 1.000000 |
| rad11                         | 2.07751e-08 | 1.000000 | 2.07751e-08 | 1.000000 |
| rad4                          | 1.99263e-08 | 1.000000 | 1.99263e-08 | 1.000000 |
| rad7                          | 1.23696e-08 | 1.000000 | 1.23696e-08 | 1.000000 |
| rad37                         | 1.04937e-08 | 1.000000 | 1.04937e-08 | 1.000000 |
| rad22                         | 9.64726e-09 | 1.000000 | 9.64726e-09 | 1.000000 |
| rad28                         | 9.17851e-09 | 1.000000 | 9.17851e-09 | 1.000000 |
| rad30                         | 8.44822e-09 | 1.000000 | 8.44822e-09 | 1.000000 |
| rad36                         | 5.16092e-09 | 1.000000 | 5.16092e-09 | 1.000000 |
| PhcycC3H3_A+H                 | 5.14848e-09 | 1.000000 | 5.14848e-09 | 1.000000 |
| PAH7+H                        | 1.84603e-09 | 1.000000 | 1.84603e-09 | 1.000000 |
| PAH9+H                        | 6.22422e-10 | 1.000000 | 6.22422e-10 | 1.000000 |
| PAH10+CH3                     | 5.98923e-10 | 1.000000 | 5.98923e-10 | 1.000000 |
| PhcycC3H3_B+H                 | 4.76125e-10 | 1.000000 | 4.76125e-10 | 1.000000 |
| rad38                         | 4.63285e-10 | 1.000000 | 4.63285e-10 | 1.000000 |
| rad5                          | 3.78486e-10 | 1.000000 | 3.78486e-10 | 1.000000 |
| rad39                         | 3.71712e-10 | 1.000000 | 3.71712e-10 | 1.000000 |
| PAH3+H                        | 2.44878e-10 | 1.000000 | 2.44878e-10 | 1.000000 |
| Phenyl+cycC3H4                | 2.22360e-10 | 1.000000 | 0.000000    | 1.000000 |
| rad60syn                      | 1.24062e-10 | 1.000000 | 1.24062e-10 | 1.000000 |
| rad60anti                     | 6.76212e-11 | 1.000000 | 6.76212e-11 | 1.000000 |
| rad13                         | 6.70041e-11 | 1.000000 | 6.70041e-11 | 1.000000 |
| rad18                         | 5.41857e-11 | 1.000000 | 5.41857e-11 | 1.000000 |
| rad46                         | 3.72943e-11 | 1.000000 | 3.72943e-11 | 1.000000 |
| rad59                         | 3.65980e-11 | 1.000000 | 3.65980e-11 | 1.000000 |
| rad27                         | 1.63838e-11 | 1.000000 | 1.63838e-11 | 1.000000 |
| rad43                         | 1.47003e-11 | 1.000000 | 1.47003e-11 | 1.000000 |
| rad14                         | 1.43013e-11 | 1.000000 | 1.43013e-11 | 1.000000 |
| rad20                         | 4.90008e-12 | 1.000000 | 4.90008e-12 | 1.000000 |
| rad21                         | 3.51488e-12 | 1.000000 | 3.51488e-12 | 1.000000 |
| rad50                         | 3.44879e-12 | 1.000000 | 3.44879e-12 | 1.000000 |
| rad54                         | 2.32565e-12 | 1.000000 | 2.32565e-12 | 1.000000 |
| rad62                         | 1.89049e-12 | 1.000000 | 1.89049e-12 | 1.000000 |
| PAH1+H                        | 1.06898e-12 | 1.000000 | 1.06898e-12 | 1.000000 |
| rad70                         | 9.75235e-13 | 1.000000 | 9.75235e-13 | 1.000000 |
| rad25                         | 5.98737e-13 | 1.000000 | 5.98737e-13 | 1.000000 |

|           |             |          |             |          |
|-----------|-------------|----------|-------------|----------|
| rad51     | 1.68233e-13 | 1.000000 | 1.68233e-13 | 1.000000 |
| rad58     | 1.64040e-13 | 1.000000 | 1.64040e-13 | 1.000000 |
| rad52     | 1.21779e-13 | 1.000000 | 1.21779e-13 | 1.000000 |
| rad33     | 1.13925e-13 | 1.000000 | 1.13925e-13 | 1.000000 |
| rad34     | 8.87848e-14 | 1.000000 | 8.87848e-14 | 1.000000 |
| rad55     | 8.59669e-14 | 1.000000 | 8.59669e-14 | 1.000000 |
| rad41     | 7.23068e-14 | 1.000000 | 7.23068e-14 | 1.000000 |
| rad19syn  | 2.04905e-14 | 1.000000 | 2.04905e-14 | 1.000000 |
| rad42     | 1.49079e-14 | 1.000000 | 1.49079e-14 | 1.000000 |
| rad31     | 9.63394e-15 | 1.000000 | 9.63394e-15 | 1.000000 |
| rad61     | 8.68889e-15 | 1.000000 | 8.68889e-15 | 1.000000 |
| rad24     | 5.14220e-15 | 1.000000 | 5.14220e-15 | 1.000000 |
| rad65     | 5.03096e-15 | 1.000000 | 5.03096e-15 | 1.000000 |
| rad53     | 1.67967e-15 | 1.000000 | 1.67967e-15 | 1.000000 |
| rad64     | 6.33299e-16 | 1.000000 | 6.33299e-16 | 1.000000 |
| rad56     | 3.78195e-16 | 1.000000 | 3.78195e-16 | 1.000000 |
| rad68syn  | 1.52938e-16 | 1.000000 | 1.52938e-16 | 1.000000 |
| rad68anti | 1.04739e-16 | 1.000000 | 1.04739e-16 | 1.000000 |
| PAH8+H    | 7.83946e-17 | 1.000000 | 7.83946e-17 | 1.000000 |
| rad40syn  | 5.01576e-17 | 1.000000 | 5.01576e-17 | 1.000000 |
| rad40anti | 4.18467e-17 | 1.000000 | 4.18467e-17 | 1.000000 |
| rad73     | 3.63346e-17 | 1.000000 | 3.63346e-17 | 1.000000 |
| rad71     | 1.36134e-17 | 1.000000 | 1.36134e-17 | 1.000000 |
| rad47     | 7.50928e-20 | 1.000000 | 7.50928e-20 | 1.000000 |
| rad72     | 1.83771e-20 | 1.000000 | 1.83771e-20 | 1.000000 |
| rad8      | 1.66240e-29 | 1.000000 | 1.66240e-29 | 1.000000 |

10000.0000 Pa, 500.000000 K

=====

| Rate constant             | True (fraction)        | Effective (fraction)   |
|---------------------------|------------------------|------------------------|
| Total                     | 2.52837e-13 (1.00 )    | 2.52837e-13 (1.00 )    |
| Formation of rad19        | 2.47941e-13 (0.981 )   | 2.47941e-13 (0.981 )   |
| H-abstraction to cyc2enyl | 4.69058e-15 (0.0186 )  | 4.69058e-15 (0.0186 )  |
| H-abstraction to cyc1enyl | 2.05381e-16 (0.000812) | 2.05381e-16 (0.000812) |

| species                       | PYtrue      | Cumul    | PYeffective | Cumul    |
|-------------------------------|-------------|----------|-------------|----------|
| rad9                          | 0.590299    | 0.590299 | 0.590299    | 0.590299 |
| Indene+H                      | 0.387679    | 0.977977 | 0.387679    | 0.977977 |
| Benzene+cycloprop-2-enylidene | 0.0185518   | 0.996529 | 0.0185518   | 0.996529 |
| PhCHCCH2+H                    | 0.00127642  | 0.997806 | 0.00127642  | 0.997806 |
| rad15                         | 0.00121302  | 0.999019 | 0.00121302  | 0.999019 |
| Benzene+cycloprop-1-enylidene | 0.000812306 | 0.999831 | 0.000812306 | 0.999831 |
| rad6                          | 6.34738e-05 | 0.999894 | 6.34738e-05 | 0.999894 |
| Ph+MeAc                       | 2.44155e-05 | 0.999919 | 2.44155e-05 | 0.999919 |
| C2H2+PhCH2                    | 2.03988e-05 | 0.999939 | 2.03988e-05 | 0.999939 |
| PhCCCH3+H                     | 1.65501e-05 | 0.999956 | 1.65501e-05 | 0.999956 |
| PhCCH+CH3                     | 1.29918e-05 | 0.999969 | 1.29918e-05 | 0.999969 |
| rad67                         | 8.12136e-06 | 0.999977 | 8.12136e-06 | 0.999977 |
| rad2                          | 4.30078e-06 | 0.999981 | 4.30078e-06 | 0.999981 |
| Ph+Allene                     | 3.50193e-06 | 0.999985 | 3.50193e-06 | 0.999985 |
| rad19anti                     | 3.50104e-06 | 0.999988 | 3.50104e-06 | 0.999988 |
| rad26                         | 3.31710e-06 | 0.999992 | 3.31710e-06 | 0.999992 |
| rad35                         | 3.07566e-06 | 0.999995 | 3.07566e-06 | 0.999995 |
| PhCH2CCH+H                    | 1.59838e-06 | 0.999996 | 1.59838e-06 | 0.999996 |
| rad23                         | 1.16085e-06 | 0.999997 | 1.16085e-06 | 0.999997 |
| rad10                         | 5.80292e-07 | 0.999998 | 5.80292e-07 | 0.999998 |
| rad1                          | 5.14803e-07 | 0.999998 | 5.14803e-07 | 0.999998 |
| rad45                         | 4.76783e-07 | 0.999999 | 4.76783e-07 | 0.999999 |
| rad37                         | 2.06293e-07 | 0.999999 | 2.06293e-07 | 0.999999 |
| PAH7+H                        | 1.02818e-07 | 0.999999 | 1.02818e-07 | 0.999999 |
| rad28                         | 1.01605e-07 | 0.999999 | 1.01605e-07 | 0.999999 |
| PhcycC3H3_A+H                 | 7.66326e-08 | 0.999999 | 7.66326e-08 | 0.999999 |
| rad30                         | 6.99488e-08 | 0.999999 | 6.99488e-08 | 0.999999 |
| rad7                          | 6.08548e-08 | 1.000000 | 6.08548e-08 | 1.000000 |
| rad3                          | 6.07951e-08 | 1.000000 | 6.07951e-08 | 1.000000 |
| rad12                         | 4.59242e-08 | 1.000000 | 4.59242e-08 | 1.000000 |
| rad11                         | 4.29229e-08 | 1.000000 | 4.29229e-08 | 1.000000 |
| rad4                          | 3.43346e-08 | 1.000000 | 3.43346e-08 | 1.000000 |
| PAH10+CH3                     | 2.69439e-08 | 1.000000 | 2.69439e-08 | 1.000000 |
| rad36                         | 2.21875e-08 | 1.000000 | 2.21875e-08 | 1.000000 |
| rad39                         | 2.17451e-08 | 1.000000 | 2.17451e-08 | 1.000000 |
| PhcycC3H3_B+H                 | 2.07094e-08 | 1.000000 | 2.07094e-08 | 1.000000 |
| PAH9+H                        | 1.83345e-08 | 1.000000 | 1.83345e-08 | 1.000000 |
| rad38                         | 1.44372e-08 | 1.000000 | 1.44372e-08 | 1.000000 |
| rad22                         | 1.08387e-08 | 1.000000 | 1.08387e-08 | 1.000000 |
| PAH3+H                        | 5.28599e-09 | 1.000000 | 5.28599e-09 | 1.000000 |
| Phenyl+cycC3H4                | 3.56029e-09 | 1.000000 | 0.000000    | 1.000000 |
| rad60syn                      | 1.64815e-09 | 1.000000 | 1.64815e-09 | 1.000000 |



|           |             |          |             |          |
|-----------|-------------|----------|-------------|----------|
| rad46     | 1.51846e-09 | 1.000000 | 1.51846e-09 | 1.000000 |
| rad60anti | 9.30744e-10 | 1.000000 | 9.30744e-10 | 1.000000 |
| rad59     | 7.17447e-10 | 1.000000 | 7.17447e-10 | 1.000000 |
| rad5      | 3.63726e-10 | 1.000000 | 3.63726e-10 | 1.000000 |
| rad50     | 3.45729e-10 | 1.000000 | 3.45729e-10 | 1.000000 |
| rad13     | 3.37289e-10 | 1.000000 | 3.37289e-10 | 1.000000 |
| rad43     | 3.35961e-10 | 1.000000 | 3.35961e-10 | 1.000000 |
| rad54     | 2.54478e-10 | 1.000000 | 2.54478e-10 | 1.000000 |
| rad19syn  | 1.46129e-10 | 1.000000 | 1.46129e-10 | 1.000000 |
| PAH1+H    | 1.08866e-10 | 1.000000 | 1.08866e-10 | 1.000000 |
| rad70     | 5.86404e-11 | 1.000000 | 5.86404e-11 | 1.000000 |
| rad18     | 5.27890e-11 | 1.000000 | 5.27890e-11 | 1.000000 |
| rad51     | 3.89357e-11 | 1.000000 | 3.89357e-11 | 1.000000 |
| rad62     | 3.84374e-11 | 1.000000 | 3.84374e-11 | 1.000000 |
| rad27     | 2.37801e-11 | 1.000000 | 2.37801e-11 | 1.000000 |
| rad14     | 2.00332e-11 | 1.000000 | 2.00332e-11 | 1.000000 |
| rad52     | 1.85759e-11 | 1.000000 | 1.85759e-11 | 1.000000 |
| rad55     | 1.17756e-11 | 1.000000 | 1.17756e-11 | 1.000000 |
| rad20     | 9.60107e-12 | 1.000000 | 9.60107e-12 | 1.000000 |
| rad58     | 8.66982e-12 | 1.000000 | 8.66982e-12 | 1.000000 |
| rad34     | 7.53377e-12 | 1.000000 | 7.53377e-12 | 1.000000 |
| rad21     | 7.12885e-12 | 1.000000 | 7.12885e-12 | 1.000000 |
| rad41     | 3.60405e-12 | 1.000000 | 3.60405e-12 | 1.000000 |
| rad61     | 2.13541e-12 | 1.000000 | 2.13541e-12 | 1.000000 |
| rad25     | 1.18980e-12 | 1.000000 | 1.18980e-12 | 1.000000 |
| rad65     | 1.15440e-12 | 1.000000 | 1.15440e-12 | 1.000000 |
| rad33     | 6.94997e-13 | 1.000000 | 6.94997e-13 | 1.000000 |
| rad31     | 6.93431e-13 | 1.000000 | 6.93431e-13 | 1.000000 |
| rad53     | 5.96487e-13 | 1.000000 | 5.96487e-13 | 1.000000 |
| rad42     | 5.82647e-13 | 1.000000 | 5.82647e-13 | 1.000000 |
| rad56     | 2.73451e-13 | 1.000000 | 2.73451e-13 | 1.000000 |
| rad64     | 2.34955e-13 | 1.000000 | 2.34955e-13 | 1.000000 |
| rad73     | 1.25923e-13 | 1.000000 | 1.25923e-13 | 1.000000 |
| PAH8+H    | 1.08980e-13 | 1.000000 | 1.08980e-13 | 1.000000 |
| rad71     | 1.08291e-13 | 1.000000 | 1.08291e-13 | 1.000000 |
| rad68syn  | 6.66854e-14 | 1.000000 | 6.66854e-14 | 1.000000 |
| rad68anti | 4.45027e-14 | 1.000000 | 4.45027e-14 | 1.000000 |
| rad40syn  | 2.88573e-14 | 1.000000 | 2.88573e-14 | 1.000000 |
| rad24     | 2.67782e-14 | 1.000000 | 2.67782e-14 | 1.000000 |
| rad40anti | 2.24662e-14 | 1.000000 | 2.24662e-14 | 1.000000 |
| rad72     | 1.42372e-15 | 1.000000 | 1.42372e-15 | 1.000000 |
| rad47     | 8.53434e-17 | 1.000000 | 8.53434e-17 | 1.000000 |
| rad8      | 1.78490e-25 | 1.000000 | 1.78490e-25 | 1.000000 |

10000.0000 Pa, 600.000000 K

| Rate constant             | True (fraction)        | Effective (fraction)   |
|---------------------------|------------------------|------------------------|
| Total                     | 4.35570e-13 (1.00 )    | 4.35570e-13 (1.00 )    |
| Formation of rad19        | 4.18892e-13 (0.962 )   | 4.18892e-13 (0.962 )   |
| H-abstraction to cyc2enyl | 1.54751e-14 (0.0355 )  | 1.54751e-14 (0.0355 )  |
| H-abstraction to cyclenyl | 1.20343e-15 (0.00276 ) | 1.20343e-15 (0.00276 ) |

| species                       | PYtrue      | Cumul    | PYeffective | Cumul    |
|-------------------------------|-------------|----------|-------------|----------|
| Indene+H                      | 0.615472    | 0.615472 | 0.615472    | 0.615472 |
| rad9                          | 0.339221    | 0.954693 | 0.339221    | 0.954693 |
| Benzene+cycloprop-2-enylidene | 0.0355285   | 0.990221 | 0.0355285   | 0.990221 |
| PhCHCCH2+H                    | 0.00559011  | 0.995812 | 0.00559011  | 0.995812 |
| Benzene+cycloprop-1-enylidene | 0.00276289  | 0.998574 | 0.00276289  | 0.998574 |
| rad15                         | 0.000667115 | 0.999242 | 0.000667115 | 0.999242 |
| rad6                          | 0.000184989 | 0.999427 | 0.000184989 | 0.999427 |
| Ph+MeAc                       | 0.000139300 | 0.999566 | 0.000139300 | 0.999566 |
| C2H2+PhCH2                    | 0.000126230 | 0.999692 | 0.000126230 | 0.999692 |
| PhCCCH3+H                     | 8.09675e-05 | 0.999773 | 8.09675e-05 | 0.999773 |
| PhCCH+CH3                     | 5.79177e-05 | 0.999831 | 5.79177e-05 | 0.999831 |
| Ph+Allene                     | 4.99246e-05 | 0.999881 | 4.99246e-05 | 0.999881 |
| rad67                         | 4.47737e-05 | 0.999926 | 4.47737e-05 | 0.999926 |
| PhCH2CCH+H                    | 2.28505e-05 | 0.999949 | 2.28505e-05 | 0.999949 |
| rad35                         | 1.65616e-05 | 0.999965 | 1.65616e-05 | 0.999965 |
| rad19anti                     | 9.38274e-06 | 0.999974 | 9.38274e-06 | 0.999974 |
| rad2                          | 5.81278e-06 | 0.999980 | 5.81278e-06 | 0.999980 |
| rad26                         | 4.18637e-06 | 0.999984 | 4.18637e-06 | 0.999984 |
| rad23                         | 2.39683e-06 | 0.999987 | 2.39683e-06 | 0.999987 |
| PhcycC3H3_A+H                 | 2.16172e-06 | 0.999989 | 2.16172e-06 | 0.999989 |
| rad37                         | 1.89599e-06 | 0.999991 | 1.89599e-06 | 0.999991 |
| PAH7+H                        | 1.78636e-06 | 0.999993 | 1.78636e-06 | 0.999993 |
| PhcycC3H3_B+H                 | 1.75974e-06 | 0.999994 | 1.75974e-06 | 0.999994 |
| rad45                         | 1.40486e-06 | 0.999996 | 1.40486e-06 | 0.999996 |
| rad1                          | 8.62405e-07 | 0.999997 | 8.62405e-07 | 0.999997 |

|                |             |          |             |          |
|----------------|-------------|----------|-------------|----------|
| PAH10+CH3      | 5.77964e-07 | 0.999997 | 5.77964e-07 | 0.999997 |
| rad10          | 5.18847e-07 | 0.999998 | 5.18847e-07 | 0.999998 |
| rad30          | 4.39267e-07 | 0.999998 | 4.39267e-07 | 0.999998 |
| rad28          | 3.97477e-07 | 0.999999 | 3.97477e-07 | 0.999999 |
| rad39          | 3.67133e-07 | 0.999999 | 3.67133e-07 | 0.999999 |
| PAH9+H         | 3.33653e-07 | 0.999999 | 3.33653e-07 | 0.999999 |
| rad38          | 2.48561e-07 | 1.000000 | 2.48561e-07 | 1.000000 |
| rad7           | 1.75119e-07 | 1.000000 | 1.75119e-07 | 1.000000 |
| rad12          | 1.28535e-07 | 1.000000 | 1.28535e-07 | 1.000000 |
| rad11          | 1.02488e-07 | 1.000000 | 1.02488e-07 | 1.000000 |
| PAH3+H         | 9.03038e-08 | 1.000000 | 9.03038e-08 | 1.000000 |
| rad36          | 8.33660e-08 | 1.000000 | 8.33660e-08 | 1.000000 |
| rad3           | 7.59166e-08 | 1.000000 | 7.59166e-08 | 1.000000 |
| rad4           | 4.64002e-08 | 1.000000 | 4.64002e-08 | 1.000000 |
| rad46          | 3.91535e-08 | 1.000000 | 3.91535e-08 | 1.000000 |
| Phenyl+cycC3H4 | 3.65009e-08 | 1.000000 | 0.000000    | 1.000000 |
| rad50          | 2.18920e-08 | 1.000000 | 2.18920e-08 | 1.000000 |
| rad60syn       | 1.65079e-08 | 1.000000 | 1.65079e-08 | 1.000000 |
| rad22          | 1.64312e-08 | 1.000000 | 1.64312e-08 | 1.000000 |
| rad19syn       | 1.52354e-08 | 1.000000 | 1.52354e-08 | 1.000000 |
| rad59          | 1.06967e-08 | 1.000000 | 1.06967e-08 | 1.000000 |
| rad60anti      | 9.65969e-09 | 1.000000 | 9.65969e-09 | 1.000000 |
| rad54          | 8.32059e-09 | 1.000000 | 8.32059e-09 | 1.000000 |
| PAH1+H         | 5.21425e-09 | 1.000000 | 5.21425e-09 | 1.000000 |
| rad51          | 5.02245e-09 | 1.000000 | 5.02245e-09 | 1.000000 |
| rad43          | 4.45250e-09 | 1.000000 | 4.45250e-09 | 1.000000 |
| rad70          | 1.89012e-09 | 1.000000 | 1.89012e-09 | 1.000000 |
| rad52          | 1.67287e-09 | 1.000000 | 1.67287e-09 | 1.000000 |
| rad13          | 1.10797e-09 | 1.000000 | 1.10797e-09 | 1.000000 |
| rad62          | 4.60994e-10 | 1.000000 | 4.60994e-10 | 1.000000 |
| rad55          | 4.55460e-10 | 1.000000 | 4.55460e-10 | 1.000000 |
| rad58          | 4.06387e-10 | 1.000000 | 4.06387e-10 | 1.000000 |
| rad34          | 3.38914e-10 | 1.000000 | 3.38914e-10 | 1.000000 |
| rad61          | 2.53953e-10 | 1.000000 | 2.53953e-10 | 1.000000 |
| rad5           | 2.18343e-10 | 1.000000 | 2.18343e-10 | 1.000000 |
| rad65          | 1.39710e-10 | 1.000000 | 1.39710e-10 | 1.000000 |
| rad41          | 1.12129e-10 | 1.000000 | 1.12129e-10 | 1.000000 |
| rad71          | 1.08452e-10 | 1.000000 | 1.08452e-10 | 1.000000 |
| rad73          | 8.44433e-11 | 1.000000 | 8.44433e-11 | 1.000000 |
| rad18          | 7.94713e-11 | 1.000000 | 7.94713e-11 | 1.000000 |
| rad53          | 4.96264e-11 | 1.000000 | 4.96264e-11 | 1.000000 |
| PAH8+H         | 4.86304e-11 | 1.000000 | 4.86304e-11 | 1.000000 |
| rad56          | 3.75113e-11 | 1.000000 | 3.75113e-11 | 1.000000 |
| rad20          | 3.06892e-11 | 1.000000 | 3.06892e-11 | 1.000000 |
| rad21          | 2.44638e-11 | 1.000000 | 2.44638e-11 | 1.000000 |
| rad27          | 2.28757e-11 | 1.000000 | 2.28757e-11 | 1.000000 |
| rad64          | 2.01247e-11 | 1.000000 | 2.01247e-11 | 1.000000 |
| rad14          | 1.83095e-11 | 1.000000 | 1.83095e-11 | 1.000000 |
| rad31          | 1.75487e-11 | 1.000000 | 1.75487e-11 | 1.000000 |
| rad42          | 1.31316e-11 | 1.000000 | 1.31316e-11 | 1.000000 |
| rad68syn       | 1.20215e-11 | 1.000000 | 1.20215e-11 | 1.000000 |
| rad40syn       | 8.17256e-12 | 1.000000 | 8.17256e-12 | 1.000000 |
| rad68anti      | 7.87216e-12 | 1.000000 | 7.87216e-12 | 1.000000 |
| rad40anti      | 6.46582e-12 | 1.000000 | 6.46582e-12 | 1.000000 |
| rad33          | 3.25376e-12 | 1.000000 | 3.25376e-12 | 1.000000 |
| rad25          | 3.15867e-12 | 1.000000 | 3.15867e-12 | 1.000000 |
| rad72          | 3.13662e-12 | 1.000000 | 3.13662e-12 | 1.000000 |
| rad24          | 2.02067e-13 | 1.000000 | 2.02067e-13 | 1.000000 |
| rad47          | 3.99776e-14 | 1.000000 | 3.99776e-14 | 1.000000 |
| rad8           | 8.11054e-22 | 1.000000 | 8.11054e-22 | 1.000000 |

10000.0000 Pa, 700.000000 K

| Rate constant             | True (fraction)        | Effective (fraction)   |
|---------------------------|------------------------|------------------------|
| Total                     | 6.91694e-13 (1.00 )    | 6.91694e-13 (1.00 )    |
| Formation of rad19        | 6.47922e-13 (0.937 )   | 6.47922e-13 (0.937 )   |
| H-abstraction to cyc2enyl | 3.91858e-14 (0.0567 )  | 3.91858e-14 (0.0567 )  |
| H-abstraction to cyc1enyl | 4.58543e-15 (0.00663 ) | 4.58542e-15 (0.00663 ) |

| species                       | PYtrue      | Cumul    | PYeffective | Cumul    |
|-------------------------------|-------------|----------|-------------|----------|
| Indene+H                      | 0.741188    | 0.741188 | 0.741188    | 0.741188 |
| rad9                          | 0.175448    | 0.916636 | 0.175448    | 0.916636 |
| Benzene+cycloprop-2-enylidene | 0.0566520   | 0.973288 | 0.0566520   | 0.973288 |
| PhCHCCH2+H                    | 0.0173668   | 0.990655 | 0.0173668   | 0.990655 |
| Benzene+cycloprop-1-enylidene | 0.00662927  | 0.997284 | 0.00662927  | 0.997284 |
| Ph+MeAc                       | 0.000503768 | 0.997788 | 0.000503768 | 0.997788 |
| C2H2+PhCH2                    | 0.000485968 | 0.998274 | 0.000485968 | 0.998274 |
| Ph+Allene                     | 0.000316121 | 0.998590 | 0.000316122 | 0.998590 |

|                |             |          |             |          |
|----------------|-------------|----------|-------------|----------|
| PhCCCH3+H      | 0.000257310 | 0.998848 | 0.000257310 | 0.998848 |
| rad6           | 0.000254820 | 0.999102 | 0.000254820 | 0.999102 |
| rad15          | 0.000244493 | 0.999347 | 0.000244493 | 0.999347 |
| PhCCH+CH3      | 0.000176887 | 0.999524 | 0.000176887 | 0.999524 |
| rad67          | 0.000166916 | 0.999691 | 0.000166916 | 0.999691 |
| PhCH2CCH+H     | 0.000152016 | 0.999843 | 0.000152016 | 0.999843 |
| rad35          | 6.08959e-05 | 0.999904 | 6.08959e-05 | 0.999904 |
| PhcycC3H3_A+H  | 1.76308e-05 | 0.999921 | 1.76308e-05 | 0.999921 |
| PhcycC3H3_B+H  | 1.72431e-05 | 0.999939 | 1.72431e-05 | 0.999939 |
| PAH7+H         | 1.09429e-05 | 0.999949 | 1.09430e-05 | 0.999949 |
| rad37          | 9.27311e-06 | 0.999959 | 9.27311e-06 | 0.999959 |
| rad19anti      | 8.86047e-06 | 0.999968 | 8.86048e-06 | 0.999968 |
| rad2           | 5.80738e-06 | 0.999973 | 5.80738e-06 | 0.999973 |
| PAH10+CH3      | 4.97213e-06 | 0.999978 | 4.97213e-06 | 0.999978 |
| rad23          | 3.17403e-06 | 0.999982 | 3.17403e-06 | 0.999982 |
| rad26          | 2.72877e-06 | 0.999984 | 2.72877e-06 | 0.999984 |
| PAH9+H         | 2.60332e-06 | 0.999987 | 2.60332e-06 | 0.999987 |
| rad39          | 2.16674e-06 | 0.999989 | 2.16674e-06 | 0.999989 |
| rad45          | 2.07680e-06 | 0.999991 | 2.07680e-06 | 0.999991 |
| rad38          | 1.90076e-06 | 0.999993 | 1.90076e-06 | 0.999993 |
| rad30          | 1.86108e-06 | 0.999995 | 1.86108e-06 | 0.999995 |
| rad1           | 1.04077e-06 | 0.999996 | 1.04077e-06 | 0.999996 |
| PAH3+H         | 7.49232e-07 | 0.999997 | 7.49233e-07 | 0.999997 |
| rad12          | 6.65010e-07 | 0.999997 | 6.65010e-07 | 0.999997 |
| rad28          | 5.97949e-07 | 0.999998 | 5.97949e-07 | 0.999998 |
| rad46          | 3.64181e-07 | 0.999998 | 3.64181e-07 | 0.999998 |
| rad10          | 3.22242e-07 | 0.999999 | 3.22242e-07 | 0.999999 |
| rad50          | 2.87639e-07 | 0.999999 | 2.87639e-07 | 0.999999 |
| Phenyl+cycC3H4 | 2.70349e-07 | 0.999999 | 0.00000     | 0.999999 |
| rad7           | 2.44479e-07 | 0.999999 | 2.44479e-07 | 0.999999 |
| rad36          | 1.58737e-07 | 1.000000 | 1.58737e-07 | 0.999999 |
| rad11          | 1.42126e-07 | 1.000000 | 1.42126e-07 | 0.999999 |
| rad60syn       | 1.00374e-07 | 1.000000 | 1.00374e-07 | 1.000000 |
| rad19syn       | 8.88007e-08 | 1.000000 | 8.88007e-08 | 1.000000 |
| rad59          | 8.25386e-08 | 1.000000 | 8.25386e-08 | 1.000000 |
| rad54          | 8.03580e-08 | 1.000000 | 8.03581e-08 | 1.000000 |
| rad51          | 7.99196e-08 | 1.000000 | 7.99196e-08 | 1.000000 |
| rad60anti      | 6.01608e-08 | 1.000000 | 6.01608e-08 | 1.000000 |
| rad3           | 5.95855e-08 | 1.000000 | 5.95855e-08 | 1.000000 |
| PAH1+H         | 5.91118e-08 | 1.000000 | 5.91118e-08 | 1.000000 |
| rad4           | 4.01602e-08 | 1.000000 | 4.01602e-08 | 1.000000 |
| rad43          | 3.07100e-08 | 1.000000 | 3.07100e-08 | 1.000000 |
| rad52          | 2.42419e-08 | 1.000000 | 2.42420e-08 | 1.000000 |
| rad22          | 2.00063e-08 | 1.000000 | 2.00063e-08 | 1.000000 |
| rad70          | 1.90710e-08 | 1.000000 | 1.90710e-08 | 1.000000 |
| rad55          | 4.75139e-09 | 1.000000 | 4.75139e-09 | 1.000000 |
| rad58          | 4.59148e-09 | 1.000000 | 4.59148e-09 | 1.000000 |
| rad34          | 3.77707e-09 | 1.000000 | 3.77707e-09 | 1.000000 |
| rad61          | 3.17862e-09 | 1.000000 | 3.17862e-09 | 1.000000 |
| rad62          | 2.94690e-09 | 1.000000 | 2.94690e-09 | 1.000000 |
| rad71          | 2.52560e-09 | 1.000000 | 2.52561e-09 | 1.000000 |
| rad65          | 2.16123e-09 | 1.000000 | 2.16123e-09 | 1.000000 |
| rad13          | 2.12818e-09 | 1.000000 | 2.12818e-09 | 1.000000 |
| rad73          | 1.84319e-09 | 1.000000 | 1.84319e-09 | 1.000000 |
| rad41          | 1.14615e-09 | 1.000000 | 1.14615e-09 | 1.000000 |
| PAH8+H         | 6.87449e-10 | 1.000000 | 6.87449e-10 | 1.000000 |
| rad53          | 6.21401e-10 | 1.000000 | 6.21401e-10 | 1.000000 |
| rad56          | 4.84296e-10 | 1.000000 | 4.84297e-10 | 1.000000 |
| rad64          | 2.68718e-10 | 1.000000 | 2.68718e-10 | 1.000000 |
| rad68syn       | 1.58941e-10 | 1.000000 | 1.58941e-10 | 1.000000 |
| rad18          | 1.19885e-10 | 1.000000 | 1.19885e-10 | 1.000000 |
| rad42          | 1.19778e-10 | 1.000000 | 1.19778e-10 | 1.000000 |
| rad40syn       | 1.12858e-10 | 1.000000 | 1.12858e-10 | 1.000000 |
| rad68anti      | 1.03969e-10 | 1.000000 | 1.03969e-10 | 1.000000 |
| rad5           | 9.57008e-11 | 1.000000 | 9.57008e-11 | 1.000000 |
| rad20          | 9.43042e-11 | 1.000000 | 9.43042e-11 | 1.000000 |
| rad40anti      | 8.98471e-11 | 1.000000 | 8.98471e-11 | 1.000000 |
| rad31          | 8.54090e-11 | 1.000000 | 8.54090e-11 | 1.000000 |
| rad21          | 8.46279e-11 | 1.000000 | 8.46279e-11 | 1.000000 |
| rad72          | 8.18961e-11 | 1.000000 | 8.18961e-11 | 1.000000 |
| rad27          | 2.07354e-11 | 1.000000 | 2.07354e-11 | 1.000000 |
| rad14          | 1.38274e-11 | 1.000000 | 1.38274e-11 | 1.000000 |
| rad33          | 1.16119e-11 | 1.000000 | 1.16119e-11 | 1.000000 |
| rad25          | 6.13051e-12 | 1.000000 | 6.13052e-12 | 1.000000 |
| rad47          | 3.52881e-12 | 1.000000 | 3.52881e-12 | 1.000000 |
| rad24          | 1.95580e-12 | 1.000000 | 1.95580e-12 | 1.000000 |
| rad8           | 8.11504e-18 | 1.000000 | 8.11504e-18 | 1.000000 |

10000.0000 Pa, 800.000000 K

=====

| Rate constant             | True (fraction)       | Effective (fraction)  |
|---------------------------|-----------------------|-----------------------|
| Total                     | 1.03759e-12 (1.00 )   | 1.03758e-12 (1.00 )   |
| Formation of rad19        | 9.41065e-13 (0.907 )  | 9.41063e-13 (0.907 )  |
| H-abstraction to cyc2enyl | 8.32953e-14 (0.0803 ) | 8.32953e-14 (0.0803 ) |
| H-abstraction to cyc1enyl | 1.32261e-14 (0.0127 ) | 1.32261e-14 (0.0127 ) |

| species                       | PYtrue      | Cumul    | PYeffective | Cumul    |
|-------------------------------|-------------|----------|-------------|----------|
| Indene+H                      | 0.737041    | 0.737041 | 0.737041    | 0.737041 |
| rad9                          | 0.120186    | 0.857227 | 0.120187    | 0.857228 |
| Benzene+cycloprop-2-enylidene | 0.0802780   | 0.937505 | 0.0802781   | 0.937506 |
| PhCHCCH2+H                    | 0.0430488   | 0.980553 | 0.0430488   | 0.980555 |
| Benzene+cycloprop-1-enylidene | 0.0127470   | 0.993300 | 0.0127470   | 0.993302 |
| Ph+MeAc                       | 0.00137468  | 0.994675 | 0.00137468  | 0.994677 |
| C2H2+PhCH2                    | 0.00132551  | 0.996000 | 0.00132552  | 0.996002 |
| Ph+Allene                     | 0.00114321  | 0.997144 | 0.00114321  | 0.997146 |
| PhCCCH3+H                     | 0.000626383 | 0.997770 | 0.000626384 | 0.997772 |
| PhCH2CCH+H                    | 0.000624201 | 0.998394 | 0.000624202 | 0.998396 |
| rad67                         | 0.000482989 | 0.998877 | 0.000482989 | 0.998879 |
| PhCCH+CH3                     | 0.000406611 | 0.999284 | 0.000406611 | 0.999286 |
| rad6                          | 0.000197488 | 0.999481 | 0.000197489 | 0.999483 |
| rad35                         | 0.000174712 | 0.999656 | 0.000174712 | 0.999658 |
| rad15                         | 8.89497e-05 | 0.999745 | 8.89498e-05 | 0.999747 |
| PhcycC3H3_A+H                 | 4.81255e-05 | 0.999793 | 4.81256e-05 | 0.999795 |
| PhcycC3H3_B+H                 | 4.41168e-05 | 0.999837 | 4.41169e-05 | 0.999839 |
| PAH7+H                        | 3.45363e-05 | 0.999872 | 3.45364e-05 | 0.999874 |
| rad37                         | 3.16461e-05 | 0.999903 | 3.16462e-05 | 0.999905 |
| PAH10+CH3                     | 2.85592e-05 | 0.999932 | 2.85592e-05 | 0.999934 |
| PAH9+H                        | 1.03926e-05 | 0.999942 | 1.03926e-05 | 0.999944 |
| rad38                         | 8.16947e-06 | 0.999951 | 8.16949e-06 | 0.999952 |
| rad19anti                     | 6.75013e-06 | 0.999957 | 6.75014e-06 | 0.999959 |
| rad39                         | 6.36807e-06 | 0.999964 | 6.36808e-06 | 0.999966 |
| rad30                         | 6.12160e-06 | 0.999970 | 6.12161e-06 | 0.999972 |
| rad12                         | 5.24600e-06 | 0.999975 | 5.24601e-06 | 0.999977 |
| PAH3+H                        | 4.36442e-06 | 0.999979 | 4.36443e-06 | 0.999981 |
| rad2                          | 3.72500e-06 | 0.999983 | 3.72501e-06 | 0.999985 |
| rad23                         | 3.28766e-06 | 0.999986 | 3.28767e-06 | 0.999988 |
| rad45                         | 2.49613e-06 | 0.999989 | 2.49613e-06 | 0.999991 |
| rad46                         | 1.52214e-06 | 0.999990 | 1.52214e-06 | 0.999992 |
| Phenyl+cycC3H4                | 1.34512e-06 | 0.999992 | 0.000000    | 0.999992 |
| rad50                         | 1.28956e-06 | 0.999993 | 1.28956e-06 | 0.999994 |
| rad26                         | 1.28206e-06 | 0.999994 | 1.28206e-06 | 0.999995 |
| rad1                          | 7.96649e-07 | 0.999995 | 7.96650e-07 | 0.999996 |
| rad28                         | 4.77122e-07 | 0.999996 | 4.77123e-07 | 0.999996 |
| rad60syn                      | 4.55681e-07 | 0.999996 | 4.55681e-07 | 0.999997 |
| rad59                         | 4.53265e-07 | 0.999997 | 4.53266e-07 | 0.999997 |
| rad54                         | 4.17574e-07 | 0.999997 | 4.17575e-07 | 0.999998 |
| PAH1+H                        | 4.02522e-07 | 0.999997 | 4.02523e-07 | 0.999998 |
| rad51                         | 3.64213e-07 | 0.999998 | 3.64213e-07 | 0.999998 |
| rad60anti                     | 2.78634e-07 | 0.999998 | 2.78634e-07 | 0.999999 |
| rad36                         | 2.34113e-07 | 0.999998 | 2.34113e-07 | 0.999999 |
| rad7                          | 2.03981e-07 | 0.999998 | 2.03982e-07 | 0.999999 |
| rad10                         | 1.66307e-07 | 0.999999 | 1.66307e-07 | 0.999999 |
| rad43                         | 1.48963e-07 | 0.999999 | 1.48963e-07 | 0.999999 |
| rad19syn                      | 1.44435e-07 | 0.999999 | 1.44435e-07 | 0.999999 |
| rad11                         | 1.27944e-07 | 0.999999 | 1.27944e-07 | 1.000000 |
| rad70                         | 1.16820e-07 | 0.999999 | 1.16821e-07 | 1.000000 |
| rad52                         | 1.09783e-07 | 0.999999 | 1.09783e-07 | 1.000000 |
| rad3                          | 3.41356e-08 | 0.999999 | 3.41357e-08 | 1.000000 |
| rad58                         | 3.28865e-08 | 0.999999 | 3.28865e-08 | 1.000000 |
| rad55                         | 2.71478e-08 | 0.999999 | 2.71478e-08 | 1.000000 |
| rad34                         | 2.55129e-08 | 0.999999 | 2.55130e-08 | 1.000000 |
| rad61                         | 2.53997e-08 | 0.999999 | 2.53997e-08 | 1.000000 |
| rad4                          | 2.50954e-08 | 0.999999 | 2.50954e-08 | 1.000000 |
| rad22                         | 1.92421e-08 | 0.999999 | 1.92421e-08 | 1.000000 |
| rad62                         | 1.22735e-08 | 0.999999 | 1.22735e-08 | 1.000000 |
| rad71                         | 1.15527e-08 | 0.999999 | 1.15527e-08 | 1.000000 |
| rad65                         | 9.94924e-09 | 0.999999 | 9.94924e-09 | 1.000000 |
| rad73                         | 8.43403e-09 | 0.999999 | 8.43404e-09 | 1.000000 |
| rad41                         | 7.47446e-09 | 0.999999 | 7.47447e-09 | 1.000000 |
| PAH8+H                        | 4.77205e-09 | 0.999999 | 4.77206e-09 | 1.000000 |
| rad53                         | 4.71282e-09 | 0.999999 | 4.71283e-09 | 1.000000 |
| rad56                         | 3.95879e-09 | 0.999999 | 3.95879e-09 | 1.000000 |
| rad13                         | 3.27416e-09 | 0.999999 | 3.27416e-09 | 1.000000 |
| rad64                         | 1.80898e-09 | 0.999999 | 1.80898e-09 | 1.000000 |
| rad68syn                      | 1.21450e-09 | 0.999999 | 1.21451e-09 | 1.000000 |
| rad40syn                      | 8.22359e-10 | 0.999999 | 8.22361e-10 | 1.000000 |
| rad68anti                     | 7.94914e-10 | 0.999999 | 7.94915e-10 | 1.000000 |
| rad42                         | 6.67584e-10 | 1.000000 | 6.67585e-10 | 1.000000 |

|           |             |          |             |          |
|-----------|-------------|----------|-------------|----------|
| rad40anti | 6.49654e-10 | 1.000000 | 6.49654e-10 | 1.000000 |
| rad72     | 3.75251e-10 | 1.000000 | 3.75251e-10 | 1.000000 |
| rad21     | 3.72244e-10 | 1.000000 | 3.72244e-10 | 1.000000 |
| rad20     | 3.47768e-10 | 1.000000 | 3.47769e-10 | 1.000000 |
| rad18     | 1.90791e-10 | 1.000000 | 1.90791e-10 | 1.000000 |
| rad31     | 1.81587e-10 | 1.000000 | 1.81587e-10 | 1.000000 |
| rad33     | 4.60404e-11 | 1.000000 | 4.60405e-11 | 1.000000 |
| rad24     | 4.27997e-11 | 1.000000 | 4.27998e-11 | 1.000000 |
| rad5      | 3.88304e-11 | 1.000000 | 3.88305e-11 | 1.000000 |
| rad47     | 3.40215e-11 | 1.000000 | 3.40216e-11 | 1.000000 |
| rad27     | 2.17772e-11 | 1.000000 | 2.17772e-11 | 1.000000 |
| rad25     | 1.07864e-11 | 1.000000 | 1.07864e-11 | 1.000000 |
| rad14     | 1.06968e-11 | 1.000000 | 1.06968e-11 | 1.000000 |
| rad8      | 1.06096e-13 | 1.000000 | 1.06096e-13 | 1.000000 |

10000.0000 Pa, 900.000000 K

| Rate constant             | True (fraction)       | Effective (fraction)  |
|---------------------------|-----------------------|-----------------------|
| Total                     | 1.49199e-12 (1.00 )   | 1.49199e-12 (1.00 )   |
| Formation of rad19        | 1.30395e-12 (0.874 )  | 1.30394e-12 (0.874 )  |
| H-abstraction to cyc2enyl | 1.56554e-13 (0.105 )  | 1.56554e-13 (0.105 )  |
| H-abstraction to cyclenyl | 3.14892e-14 (0.0211 ) | 3.14890e-14 (0.0211 ) |

| species                       | PYtrue      | Cumul    | PYeffective | Cumul    |
|-------------------------------|-------------|----------|-------------|----------|
| Indene+H                      | 0.686916    | 0.686916 | 0.686920    | 0.686920 |
| Benzene+cycloprop-2-enylidene | 0.104929    | 0.791846 | 0.104930    | 0.791850 |
| PhCHCCH2+H                    | 0.0889277   | 0.880774 | 0.0889285   | 0.880778 |
| rad9                          | 0.0831258   | 0.963899 | 0.0831262   | 0.963904 |
| Benzene+cycloprop-1-enylidene | 0.0211054   | 0.985005 | 0.0211054   | 0.985010 |
| Ph+MeAc                       | 0.00301008  | 0.988015 | 0.00301010  | 0.988020 |
| C2H2+PhCH2                    | 0.00288931  | 0.990904 | 0.00288933  | 0.990909 |
| Ph+Allene                     | 0.00279997  | 0.993704 | 0.00279998  | 0.993709 |
| PhCH2CCH+H                    | 0.00182491  | 0.995529 | 0.00182492  | 0.995534 |
| PhCCCH3+H                     | 0.00123926  | 0.996768 | 0.00123926  | 0.996773 |
| rad67                         | 0.00112520  | 0.997894 | 0.00112520  | 0.997898 |
| PhCCH+CH3                     | 0.000805593 | 0.998699 | 0.000805597 | 0.998704 |
| rad35                         | 0.000406441 | 0.999106 | 0.000406443 | 0.999110 |
| PhcycC3H3_A+H                 | 0.000149098 | 0.999255 | 0.000149099 | 0.999260 |
| PhcycC3H3_B+H                 | 0.000142142 | 0.999397 | 0.000142142 | 0.999402 |
| rad6                          | 0.000120539 | 0.999517 | 0.000120540 | 0.999522 |
| PAH10+CH3                     | 0.000115304 | 0.999633 | 0.000115305 | 0.999638 |
| rad37                         | 7.82665e-05 | 0.999711 | 7.82669e-05 | 0.999716 |
| PAH7+H                        | 7.51003e-05 | 0.999786 | 7.51007e-05 | 0.999791 |
| rad15                         | 4.07972e-05 | 0.999827 | 4.07975e-05 | 0.999832 |
| PAH9+H                        | 3.32536e-05 | 0.999860 | 3.32537e-05 | 0.999865 |
| rad38                         | 2.67134e-05 | 0.999887 | 2.67135e-05 | 0.999892 |
| rad12                         | 2.07492e-05 | 0.999908 | 2.07494e-05 | 0.999912 |
| PAH3+H                        | 2.02533e-05 | 0.999928 | 2.02533e-05 | 0.999933 |
| rad30                         | 1.61525e-05 | 0.999944 | 1.61527e-05 | 0.999949 |
| rad39                         | 1.30318e-05 | 0.999957 | 1.30319e-05 | 0.999962 |
| Phenyl+cycC3H4                | 5.19964e-06 | 0.999962 | 0.000000    | 0.999962 |
| rad46                         | 5.16950e-06 | 0.999967 | 5.16953e-06 | 0.999967 |
| rad50                         | 4.97911e-06 | 0.999972 | 4.97913e-06 | 0.999972 |
| rad19anti                     | 4.92350e-06 | 0.999977 | 4.92353e-06 | 0.999977 |
| rad23                         | 3.35412e-06 | 0.999981 | 3.35414e-06 | 0.999980 |
| rad45                         | 3.05593e-06 | 0.999984 | 3.05596e-06 | 0.999983 |
| rad2                          | 2.21272e-06 | 0.999986 | 2.21274e-06 | 0.999986 |
| PAH1+H                        | 2.04865e-06 | 0.999988 | 2.04866e-06 | 0.999988 |
| rad59                         | 1.95154e-06 | 0.999990 | 1.95155e-06 | 0.999990 |
| rad60syn                      | 1.62627e-06 | 0.999992 | 1.62627e-06 | 0.999991 |
| rad51                         | 1.49116e-06 | 0.999993 | 1.49117e-06 | 0.999993 |
| rad54                         | 1.33819e-06 | 0.999994 | 1.33820e-06 | 0.999994 |
| rad60anti                     | 1.01365e-06 | 0.999995 | 1.01366e-06 | 0.999995 |
| rad1                          | 5.58846e-07 | 0.999996 | 5.58850e-07 | 0.999996 |
| rad26                         | 5.53665e-07 | 0.999996 | 5.53668e-07 | 0.999996 |
| rad43                         | 5.47828e-07 | 0.999997 | 5.47831e-07 | 0.999997 |
| rad70                         | 5.13434e-07 | 0.999998 | 5.13437e-07 | 0.999997 |
| rad52                         | 4.37036e-07 | 0.999998 | 4.37038e-07 | 0.999998 |
| rad36                         | 3.05043e-07 | 0.999998 | 3.05044e-07 | 0.999998 |
| rad28                         | 2.94296e-07 | 0.999999 | 2.94297e-07 | 0.999998 |
| rad58                         | 2.05594e-07 | 0.999999 | 2.05595e-07 | 0.999998 |
| rad61                         | 1.73002e-07 | 0.999999 | 1.73003e-07 | 0.999999 |
| rad19syn                      | 1.51739e-07 | 0.999999 | 1.51739e-07 | 0.999999 |
| rad7                          | 1.49386e-07 | 0.999999 | 1.49387e-07 | 0.999999 |
| rad34                         | 1.28430e-07 | 0.999999 | 1.28431e-07 | 0.999999 |
| rad11                         | 1.11654e-07 | 1.000000 | 1.11655e-07 | 0.999999 |
| rad55                         | 9.58740e-08 | 1.000000 | 9.58739e-08 | 0.999999 |
| rad10                         | 9.05410e-08 | 1.000000 | 9.05419e-08 | 0.999999 |

|           |             |          |             |          |
|-----------|-------------|----------|-------------|----------|
| rad71     | 5.11379e-08 | 1.000000 | 5.11382e-08 | 0.999999 |
| PAH8+H    | 4.46325e-08 | 1.000000 | 4.46328e-08 | 0.999999 |
| rad65     | 4.16534e-08 | 1.000000 | 4.16535e-08 | 1.000000 |
| rad41     | 3.82983e-08 | 1.000000 | 3.82984e-08 | 1.000000 |
| rad62     | 3.73171e-08 | 1.000000 | 3.73172e-08 | 1.000000 |
| rad73     | 3.70647e-08 | 1.000000 | 3.70648e-08 | 1.000000 |
| rad56     | 2.43220e-08 | 1.000000 | 2.43221e-08 | 1.000000 |
| rad53     | 2.41805e-08 | 1.000000 | 2.41806e-08 | 1.000000 |
| rad22     | 2.22677e-08 | 1.000000 | 2.22678e-08 | 1.000000 |
| rad3      | 2.09658e-08 | 1.000000 | 2.09660e-08 | 1.000000 |
| rad4      | 1.63470e-08 | 1.000000 | 1.63471e-08 | 1.000000 |
| rad64     | 9.10305e-09 | 1.000000 | 9.10313e-09 | 1.000000 |
| rad68syn  | 9.09099e-09 | 1.000000 | 9.09107e-09 | 1.000000 |
| rad40syn  | 6.97348e-09 | 1.000000 | 6.97351e-09 | 1.000000 |
| rad13     | 5.94794e-09 | 1.000000 | 5.94798e-09 | 1.000000 |
| rad68anti | 5.92176e-09 | 1.000000 | 5.92179e-09 | 1.000000 |
| rad40anti | 5.55634e-09 | 1.000000 | 5.55636e-09 | 1.000000 |
| rad21     | 2.87421e-09 | 1.000000 | 2.87422e-09 | 1.000000 |
| rad42     | 2.73353e-09 | 1.000000 | 2.73354e-09 | 1.000000 |
| rad20     | 1.95416e-09 | 1.000000 | 1.95417e-09 | 1.000000 |
| rad72     | 1.66970e-09 | 1.000000 | 1.66971e-09 | 1.000000 |
| rad24     | 7.92947e-10 | 1.000000 | 7.92952e-10 | 1.000000 |
| rad18     | 5.18498e-10 | 1.000000 | 5.18501e-10 | 1.000000 |
| rad33     | 2.80684e-10 | 1.000000 | 2.80685e-10 | 1.000000 |
| rad31     | 2.67255e-10 | 1.000000 | 2.67257e-10 | 1.000000 |
| rad47     | 1.67546e-10 | 1.000000 | 1.67547e-10 | 1.000000 |
| rad8      | 1.21586e-10 | 1.000000 | 1.21586e-10 | 1.000000 |
| rad27     | 3.42302e-11 | 1.000000 | 3.42305e-11 | 1.000000 |
| rad25     | 2.71054e-11 | 1.000000 | 2.71056e-11 | 1.000000 |
| rad5      | 1.63604e-11 | 1.000000 | 1.63604e-11 | 1.000000 |
| rad14     | 1.26662e-11 | 1.000000 | 1.26663e-11 | 1.000000 |

10000.0000 Pa, 1000.00000 K

=====

| Rate constant             | True (fraction)       | Effective (fraction)  |
|---------------------------|-----------------------|-----------------------|
| Total                     | 2.07591e-12 (1.00 )   | 2.07587e-12 (1.00 )   |
| Formation of rad19        | 1.74189e-12 (0.839 )  | 1.74186e-12 (0.839 )  |
| H-abstraction to cyc2enyl | 2.68753e-13 (0.129 )  | 2.68753e-13 (0.129 )  |
| H-abstraction to cyclenyl | 6.52627e-14 (0.0314 ) | 6.52614e-14 (0.0314 ) |

| species                       | PYtrue      | Cumul    | PYeffective | Cumul    |
|-------------------------------|-------------|----------|-------------|----------|
| Indene+H                      | 0.634413    | 0.634413 | 0.634424    | 0.634424 |
| PhCHCCH2+H                    | 0.131297    | 0.765710 | 0.131299    | 0.765723 |
| Benzene+cycloprop-2-enylidene | 0.129463    | 0.895173 | 0.129465    | 0.895189 |
| rad9                          | 0.0500337   | 0.945207 | 0.0500346   | 0.945223 |
| Benzene+cycloprop-1-enylidene | 0.0314382   | 0.976645 | 0.0314381   | 0.976661 |
| Ph+MeAc                       | 0.00455720  | 0.981202 | 0.00455727  | 0.981219 |
| C2H2+PhCH2                    | 0.00438849  | 0.985591 | 0.00438856  | 0.985607 |
| Ph+Allene                     | 0.00437051  | 0.989961 | 0.00437059  | 0.989978 |
| PhCH2CCH+H                    | 0.00314873  | 0.993110 | 0.00314878  | 0.993127 |
| PhCCCH3+H                     | 0.00177361  | 0.994884 | 0.00177364  | 0.994900 |
| rad67                         | 0.00175697  | 0.996641 | 0.00175700  | 0.996657 |
| PhCCH+CH3                     | 0.00119946  | 0.997840 | 0.00119948  | 0.997857 |
| rad35                         | 0.000635757 | 0.998476 | 0.000635768 | 0.998493 |
| PhcycC3H3_A+H                 | 0.000321892 | 0.998798 | 0.000321898 | 0.998814 |
| PhcycC3H3_B+H                 | 0.000320747 | 0.999119 | 0.000320753 | 0.999135 |
| PAH10+CH3                     | 0.000227344 | 0.999346 | 0.000227347 | 0.999363 |
| rad37                         | 0.000122165 | 0.999468 | 0.000122167 | 0.999485 |
| PAH7+H                        | 0.000112963 | 0.999581 | 0.000112965 | 0.999598 |
| rad6                          | 7.58349e-05 | 0.999657 | 7.58362e-05 | 0.999674 |
| PAH9+H                        | 6.33636e-05 | 0.999720 | 6.33647e-05 | 0.999737 |
| rad38                         | 4.99821e-05 | 0.999770 | 4.99830e-05 | 0.999787 |
| PAH3+H                        | 4.35283e-05 | 0.999814 | 4.35291e-05 | 0.999830 |
| rad12                         | 3.78772e-05 | 0.999852 | 3.78778e-05 | 0.999868 |
| rad30                         | 2.68820e-05 | 0.999879 | 2.68825e-05 | 0.999895 |
| rad15                         | 2.49348e-05 | 0.999904 | 2.49353e-05 | 0.999920 |
| rad39                         | 1.94845e-05 | 0.999923 | 1.94849e-05 | 0.999940 |
| Phenyl+cycC3H4                | 1.69547e-05 | 0.999940 | 0.00000     | 0.999940 |
| rad50                         | 1.09529e-05 | 0.999951 | 1.09531e-05 | 0.999951 |
| rad46                         | 1.03031e-05 | 0.999961 | 1.03034e-05 | 0.999961 |
| PAH1+H                        | 4.52215e-06 | 0.999966 | 4.52223e-06 | 0.999965 |
| rad59                         | 4.05720e-06 | 0.999970 | 4.05728e-06 | 0.999969 |
| rad19anti                     | 3.62903e-06 | 0.999973 | 3.62909e-06 | 0.999973 |
| rad51                         | 3.47104e-06 | 0.999977 | 3.47110e-06 | 0.999976 |
| rad45                         | 3.38920e-06 | 0.999980 | 3.38927e-06 | 0.999980 |
| rad23                         | 3.27956e-06 | 0.999984 | 3.27962e-06 | 0.999983 |
| rad60syn                      | 3.11874e-06 | 0.999987 | 3.11880e-06 | 0.999986 |
| rad54                         | 2.33074e-06 | 0.999989 | 2.33078e-06 | 0.999989 |

|           |             |          |             |          |
|-----------|-------------|----------|-------------|----------|
| rad60anti | 1.96051e-06 | 0.999991 | 1.96055e-06 | 0.999991 |
| rad2      | 1.60075e-06 | 0.999993 | 1.60078e-06 | 0.999992 |
| rad70     | 1.06516e-06 | 0.999994 | 1.06517e-06 | 0.999993 |
| rad43     | 1.05581e-06 | 0.999995 | 1.05583e-06 | 0.999994 |
| rad52     | 9.88190e-07 | 0.999996 | 9.88204e-07 | 0.999995 |
| rad58     | 4.97821e-07 | 0.999996 | 4.97830e-07 | 0.999996 |
| rad1      | 4.35718e-07 | 0.999997 | 4.35725e-07 | 0.999996 |
| rad61     | 4.24639e-07 | 0.999997 | 4.24647e-07 | 0.999997 |
| rad36     | 3.34786e-07 | 0.999997 | 3.34792e-07 | 0.999997 |
| rad34     | 2.82617e-07 | 0.999998 | 2.82622e-07 | 0.999997 |
| rad26     | 2.77696e-07 | 0.999998 | 2.77701e-07 | 0.999998 |
| rad28     | 1.86269e-07 | 0.999998 | 1.86273e-07 | 0.999998 |
| rad55     | 1.74925e-07 | 0.999998 | 1.74928e-07 | 0.999998 |
| rad19syn  | 1.42446e-07 | 0.999998 | 1.42448e-07 | 0.999998 |
| rad7      | 1.41412e-07 | 0.999999 | 1.41415e-07 | 0.999998 |
| rad11     | 1.39811e-07 | 0.999999 | 1.39813e-07 | 0.999998 |
| rad71     | 1.35710e-07 | 0.999999 | 1.35713e-07 | 0.999998 |
| PAH8+H    | 1.27170e-07 | 0.999999 | 1.27172e-07 | 0.999999 |
| rad65     | 9.70116e-08 | 0.999999 | 9.70130e-08 | 0.999999 |
| rad73     | 9.59895e-08 | 0.999999 | 9.59918e-08 | 0.999999 |
| rad41     | 8.51996e-08 | 0.999999 | 8.52010e-08 | 0.999999 |
| rad10     | 7.22744e-08 | 0.999999 | 7.22757e-08 | 0.999999 |
| rad62     | 6.62563e-08 | 0.999999 | 6.62575e-08 | 0.999999 |
| rad56     | 5.68497e-08 | 0.999999 | 5.68506e-08 | 0.999999 |
| rad53     | 5.23577e-08 | 1.000000 | 5.23587e-08 | 0.999999 |
| rad22     | 4.45057e-08 | 1.000000 | 4.45065e-08 | 0.999999 |
| rad21     | 2.47897e-08 | 1.000000 | 2.47901e-08 | 0.999999 |
| rad68syn  | 2.35473e-08 | 1.000000 | 2.35477e-08 | 0.999999 |
| rad64     | 2.03825e-08 | 1.000000 | 2.03829e-08 | 0.999999 |
| rad40syn  | 1.90767e-08 | 1.000000 | 1.90770e-08 | 0.999999 |
| rad13     | 1.64038e-08 | 1.000000 | 1.64041e-08 | 0.999999 |
| rad68anti | 1.53083e-08 | 1.000000 | 1.53086e-08 | 0.999999 |
| rad40anti | 1.52706e-08 | 1.000000 | 1.52709e-08 | 0.999999 |
| rad3      | 1.52610e-08 | 1.000000 | 1.52613e-08 | 0.999999 |
| rad4      | 1.20823e-08 | 1.000000 | 1.20825e-08 | 0.999999 |
| rad20     | 1.17765e-08 | 1.000000 | 1.17767e-08 | 0.999999 |
| rad8      | 9.67766e-09 | 1.000000 | 9.67780e-09 | 0.999999 |
| rad42     | 5.57303e-09 | 1.000000 | 5.57313e-09 | 0.999999 |
| rad24     | 5.03808e-09 | 1.000000 | 5.03817e-09 | 0.999999 |
| rad72     | 4.63239e-09 | 1.000000 | 4.63247e-09 | 0.999999 |
| rad18     | 2.32855e-09 | 1.000000 | 2.32859e-09 | 0.999999 |
| rad33     | 1.84908e-09 | 1.000000 | 1.84912e-09 | 0.999999 |
| rad47     | 4.01253e-10 | 1.000000 | 4.01260e-10 | 0.999999 |
| rad31     | 3.11689e-10 | 1.000000 | 3.11694e-10 | 0.999999 |
| rad25     | 1.40889e-10 | 1.000000 | 1.40891e-10 | 0.999999 |
| rad27     | 1.09486e-10 | 1.000000 | 1.09488e-10 | 0.999999 |
| rad14     | 2.55761e-11 | 1.000000 | 2.55767e-11 | 0.999999 |
| rad5      | 9.03567e-12 | 1.000000 | 9.03581e-12 | 0.999999 |

10000.0000 Pa, 1100.00000 K

| Rate constant             | True (fraction)      | Effective (fraction) |
|---------------------------|----------------------|----------------------|
| Total                     | 2.81236e-12 (1.00)   | 2.81222e-12 (1.00)   |
| Formation of rad19        | 2.25993e-12 (0.804)  | 2.25980e-12 (0.804)  |
| H-abstraction to cyc2enyl | 4.30538e-13 (0.153)  | 4.30538e-13 (0.153)  |
| H-abstraction to cyc1enyl | 1.21896e-13 (0.0433) | 1.21889e-13 (0.0433) |

| species                       | PYtrue      | Cumul    | PYeffective | Cumul    |
|-------------------------------|-------------|----------|-------------|----------|
| Indene+H                      | 0.598552    | 0.598552 | 0.598581    | 0.598581 |
| Benzene+cycloprop-2-enylidene | 0.153088    | 0.751639 | 0.153095    | 0.751677 |
| PhCHCCH2+H                    | 0.144622    | 0.896261 | 0.144629    | 0.896306 |
| Benzene+cycloprop-1-enylidene | 0.0433429   | 0.939604 | 0.0433425   | 0.939648 |
| rad9                          | 0.0341669   | 0.973771 | 0.0341686   | 0.973817 |
| Ph+MeAc                       | 0.00504922  | 0.978820 | 0.00504947  | 0.978867 |
| Ph+Allene                     | 0.00487356  | 0.983693 | 0.00487381  | 0.983740 |
| C2H2+PhCH2                    | 0.00486866  | 0.988562 | 0.00486890  | 0.988609 |
| PhCH2CCH+H                    | 0.00359151  | 0.992154 | 0.00359169  | 0.992201 |
| rad67                         | 0.00195929  | 0.994113 | 0.00195939  | 0.994160 |
| PhCCCH3+H                     | 0.00193798  | 0.996051 | 0.00193808  | 0.996098 |
| PhCCH+CH3                     | 0.00133110  | 0.997382 | 0.00133116  | 0.997430 |
| rad35                         | 0.000709480 | 0.998091 | 0.000709516 | 0.998139 |
| PhcycC3H3_A+H                 | 0.000458685 | 0.998550 | 0.000458709 | 0.998598 |
| PhcycC3H3_B+H                 | 0.000445732 | 0.998996 | 0.000445754 | 0.999044 |
| PAH10+CH3                     | 0.000266400 | 0.999262 | 0.000266414 | 0.999310 |
| rad37                         | 0.000135557 | 0.999398 | 0.000135564 | 0.999446 |
| PAH7+H                        | 0.000125816 | 0.999524 | 0.000125823 | 0.999571 |
| PAH9+H                        | 7.43979e-05 | 0.999598 | 7.44017e-05 | 0.999646 |
| rad38                         | 5.82147e-05 | 0.999656 | 5.82175e-05 | 0.999704 |

|                |             |          |             |          |
|----------------|-------------|----------|-------------|----------|
| PAH3+H         | 5.23832e-05 | 0.999709 | 5.23859e-05 | 0.999756 |
| rad6           | 5.12742e-05 | 0.999760 | 5.12767e-05 | 0.999808 |
| rad12          | 4.77275e-05 | 0.999808 | 4.77299e-05 | 0.999855 |
| Phenyl+cycC3H4 | 4.76032e-05 | 0.999855 | 0.00000     | 0.999855 |
| rad30          | 3.04150e-05 | 0.999886 | 3.04165e-05 | 0.999886 |
| rad15          | 2.44179e-05 | 0.999910 | 2.44191e-05 | 0.999910 |
| rad39          | 2.18450e-05 | 0.999932 | 2.18461e-05 | 0.999932 |
| rad50          | 1.34574e-05 | 0.999945 | 1.34581e-05 | 0.999945 |
| rad46          | 1.22658e-05 | 0.999958 | 1.22665e-05 | 0.999958 |
| PAH1+H         | 5.47074e-06 | 0.999963 | 5.47102e-06 | 0.999963 |
| rad59          | 4.84020e-06 | 0.999968 | 4.84044e-06 | 0.999968 |
| rad51          | 4.34976e-06 | 0.999972 | 4.34998e-06 | 0.999972 |
| rad60syn       | 3.64818e-06 | 0.999976 | 3.64836e-06 | 0.999976 |
| rad45          | 3.37126e-06 | 0.999979 | 3.37143e-06 | 0.999979 |
| rad23          | 3.02333e-06 | 0.999982 | 3.02347e-06 | 0.999982 |
| rad19anti      | 2.70528e-06 | 0.999985 | 2.70542e-06 | 0.999985 |
| rad54          | 2.65208e-06 | 0.999988 | 2.65220e-06 | 0.999988 |
| rad60anti      | 2.29802e-06 | 0.999990 | 2.29813e-06 | 0.999990 |
| rad2           | 1.33524e-06 | 0.999991 | 1.33531e-06 | 0.999991 |
| rad70          | 1.26876e-06 | 0.999993 | 1.26883e-06 | 0.999993 |
| rad43          | 1.23372e-06 | 0.999994 | 1.23378e-06 | 0.999994 |
| rad52          | 1.22555e-06 | 0.999995 | 1.22561e-06 | 0.999995 |
| rad58          | 6.18237e-07 | 0.999996 | 6.18268e-07 | 0.999996 |
| rad61          | 5.27478e-07 | 0.999996 | 5.27505e-07 | 0.999996 |
| rad1           | 3.67126e-07 | 0.999997 | 3.67144e-07 | 0.999997 |
| rad34          | 3.41820e-07 | 0.999997 | 3.41837e-07 | 0.999997 |
| rad36          | 3.28408e-07 | 0.999997 | 3.28424e-07 | 0.999997 |
| rad11          | 2.63404e-07 | 0.999997 | 2.63418e-07 | 0.999998 |
| rad55          | 2.01142e-07 | 0.999998 | 2.01152e-07 | 0.999998 |
| rad7           | 1.88785e-07 | 0.999998 | 1.88795e-07 | 0.999998 |
| rad26          | 1.82401e-07 | 0.999998 | 1.82409e-07 | 0.999998 |
| rad71          | 1.79141e-07 | 0.999998 | 1.79149e-07 | 0.999998 |
| PAH8+H         | 1.65623e-07 | 0.999998 | 1.65631e-07 | 0.999999 |
| rad19syn       | 1.28394e-07 | 0.999999 | 1.28400e-07 | 0.999999 |
| rad28          | 1.26505e-07 | 0.999999 | 1.26512e-07 | 0.999999 |
| rad73          | 1.25385e-07 | 0.999999 | 1.25391e-07 | 0.999999 |
| rad65          | 1.21349e-07 | 0.999999 | 1.21356e-07 | 0.999999 |
| rad21          | 1.10401e-07 | 0.999999 | 1.10406e-07 | 0.999999 |
| rad41          | 1.03250e-07 | 0.999999 | 1.03255e-07 | 0.999999 |
| rad8           | 9.67473e-08 | 0.999999 | 9.67529e-08 | 0.999999 |
| rad22          | 9.27938e-08 | 0.999999 | 9.27986e-08 | 0.999999 |
| rad10          | 9.16246e-08 | 0.999999 | 9.16286e-08 | 1.000000 |
| rad62          | 7.62456e-08 | 0.999999 | 7.62494e-08 | 1.000000 |
| rad56          | 6.96435e-08 | 1.000000 | 6.96470e-08 | 1.000000 |
| rad53          | 6.28297e-08 | 1.000000 | 6.28329e-08 | 1.000000 |
| rad13          | 5.62949e-08 | 1.000000 | 5.62976e-08 | 1.000000 |
| rad20          | 3.96504e-08 | 1.000000 | 3.96523e-08 | 1.000000 |
| rad68syn       | 2.97935e-08 | 1.000000 | 2.97950e-08 | 1.000000 |
| rad64          | 2.48739e-08 | 1.000000 | 2.48752e-08 | 1.000000 |
| rad40syn       | 2.45340e-08 | 1.000000 | 2.45352e-08 | 1.000000 |
| rad40anti      | 1.96677e-08 | 1.000000 | 1.96687e-08 | 1.000000 |
| rad68anti      | 1.93579e-08 | 1.000000 | 1.93589e-08 | 1.000000 |
| rad24          | 1.27011e-08 | 1.000000 | 1.27017e-08 | 1.000000 |
| rad3           | 1.22907e-08 | 1.000000 | 1.22914e-08 | 1.000000 |
| rad4           | 9.73870e-09 | 1.000000 | 9.73917e-09 | 1.000000 |
| rad18          | 8.26503e-09 | 1.000000 | 8.26544e-09 | 1.000000 |
| rad42          | 6.62778e-09 | 1.000000 | 6.62811e-09 | 1.000000 |
| rad33          | 6.44439e-09 | 1.000000 | 6.44472e-09 | 1.000000 |
| rad72          | 6.23863e-09 | 1.000000 | 6.23894e-09 | 1.000000 |
| rad25          | 8.63717e-10 | 1.000000 | 8.63765e-10 | 1.000000 |
| rad27          | 5.04920e-10 | 1.000000 | 5.04946e-10 | 1.000000 |
| rad47          | 4.87181e-10 | 1.000000 | 4.87205e-10 | 1.000000 |
| rad31          | 3.12335e-10 | 1.000000 | 3.12350e-10 | 1.000000 |
| rad14          | 6.97084e-11 | 1.000000 | 6.97118e-11 | 1.000000 |
| rad5           | 7.55813e-12 | 1.000000 | 7.55851e-12 | 1.000000 |

10000.0000 Pa, 1200.00000 K

| Rate constant                 | True (fraction)       | Effective (fraction)  |             |          |
|-------------------------------|-----------------------|-----------------------|-------------|----------|
| Total                         | 3.72623e-12 (1.00 )   | 3.72576e-12 (1.00 )   |             |          |
| Formation of rad19            | 2.86288e-12 (0.768 )  | 2.86245e-12 (0.768 )  |             |          |
| H-abstraction to cyc2enyl     | 6.53266e-13 (0.175 )  | 6.53266e-13 (0.175 )  |             |          |
| H-abstraction to cyclenyl     | 2.10085e-13 (0.0564 ) | 2.10053e-13 (0.0564 ) |             |          |
| species                       | PYtrue                | Cumul                 | PYeffective | Cumul    |
| Indene+H                      | 0.572481              | 0.572481              | 0.572553    | 0.572553 |
| Benzene+cycloprop-2-enylidene | 0.175315              | 0.747796              | 0.175337    | 0.747890 |
| PhCHCCH2+H                    | 0.143688              | 0.891484              | 0.143705    | 0.891596 |



|                               |             |          |             |          |
|-------------------------------|-------------|----------|-------------|----------|
| Benzene+cycloprop-1-enylidene | 0.0563801   | 0.947864 | 0.0563786   | 0.947974 |
| rad9                          | 0.0258215   | 0.973685 | 0.0258248   | 0.973799 |
| Ph+MeAc                       | 0.00501110  | 0.978696 | 0.00501172  | 0.978811 |
| Ph+Allene                     | 0.00484983  | 0.983546 | 0.00485044  | 0.983661 |
| C2H2+PhCH2                    | 0.00482205  | 0.988368 | 0.00482266  | 0.988484 |
| PhCH2CCH+H                    | 0.00351883  | 0.991887 | 0.00351927  | 0.992003 |
| rad67                         | 0.00193819  | 0.993825 | 0.00193843  | 0.993941 |
| PhCCCH3+H                     | 0.00193356  | 0.995759 | 0.00193381  | 0.995875 |
| PhCCH+CH3                     | 0.00131541  | 0.997074 | 0.00131558  | 0.997191 |
| rad35                         | 0.000701461 | 0.997776 | 0.000701550 | 0.997892 |
| PhcycC3H3_A+H                 | 0.000609753 | 0.998385 | 0.000609829 | 0.998502 |
| PhcycC3H3_B+H                 | 0.000564628 | 0.998950 | 0.000564700 | 0.999067 |
| PAH10+CH3                     | 0.000256339 | 0.999206 | 0.000256372 | 0.999323 |
| rad37                         | 0.000134491 | 0.999341 | 0.000134508 | 0.999458 |
| PAH7+H                        | 0.000125506 | 0.999466 | 0.000125521 | 0.999583 |
| Phenyl+cycC3H4                | 0.000117647 | 0.999584 | 0.000000    | 0.999583 |
| PAH9+H                        | 7.15355e-05 | 0.999655 | 7.15445e-05 | 0.999655 |
| rad38                         | 5.62082e-05 | 0.999712 | 5.62153e-05 | 0.999711 |
| PAH3+H                        | 5.00692e-05 | 0.999762 | 5.00755e-05 | 0.999761 |
| rad12                         | 4.94711e-05 | 0.999811 | 4.94773e-05 | 0.999811 |
| rad6                          | 3.67167e-05 | 0.999848 | 3.67213e-05 | 0.999847 |
| rad15                         | 3.51390e-05 | 0.999883 | 3.51435e-05 | 0.999882 |
| rad30                         | 2.98602e-05 | 0.999913 | 2.98640e-05 | 0.999912 |
| rad39                         | 2.17589e-05 | 0.999935 | 2.17616e-05 | 0.999934 |
| rad50                         | 1.28109e-05 | 0.999947 | 1.28125e-05 | 0.999947 |
| rad46                         | 1.17417e-05 | 0.999959 | 1.17432e-05 | 0.999959 |
| PAH1+H                        | 5.21572e-06 | 0.999964 | 5.21638e-06 | 0.999964 |
| rad59                         | 4.63922e-06 | 0.999969 | 4.63981e-06 | 0.999969 |
| rad51                         | 4.13829e-06 | 0.999973 | 4.13881e-06 | 0.999973 |
| rad60syn                      | 3.52497e-06 | 0.999977 | 3.52542e-06 | 0.999976 |
| rad45                         | 3.24446e-06 | 0.999980 | 3.24487e-06 | 0.999979 |
| rad23                         | 2.77106e-06 | 0.999983 | 2.77141e-06 | 0.999982 |
| rad54                         | 2.60762e-06 | 0.999985 | 2.60795e-06 | 0.999985 |
| rad60anti                     | 2.21841e-06 | 0.999988 | 2.21870e-06 | 0.999987 |
| rad19anti                     | 2.04417e-06 | 0.999990 | 2.04442e-06 | 0.999989 |
| rad70                         | 1.21686e-06 | 0.999991 | 1.21701e-06 | 0.999990 |
| rad43                         | 1.18967e-06 | 0.999992 | 1.18982e-06 | 0.999991 |
| rad52                         | 1.16593e-06 | 0.999993 | 1.16608e-06 | 0.999993 |
| rad2                          | 1.14737e-06 | 0.999994 | 1.14752e-06 | 0.999994 |
| rad11                         | 6.40686e-07 | 0.999995 | 6.40767e-07 | 0.999994 |
| rad58                         | 5.86432e-07 | 0.999996 | 5.86506e-07 | 0.999995 |
| rad61                         | 4.98904e-07 | 0.999996 | 4.98967e-07 | 0.999996 |
| rad34                         | 3.26146e-07 | 0.999996 | 3.26187e-07 | 0.999996 |
| rad7                          | 3.22387e-07 | 0.999997 | 3.22427e-07 | 0.999996 |
| rad1                          | 3.15182e-07 | 0.999997 | 3.15221e-07 | 0.999996 |
| rad36                         | 3.13813e-07 | 0.999997 | 3.13852e-07 | 0.999997 |
| rad8                          | 2.88628e-07 | 0.999998 | 2.88664e-07 | 0.999997 |
| rad21                         | 2.50596e-07 | 0.999998 | 2.50628e-07 | 0.999997 |
| rad55                         | 1.96406e-07 | 0.999998 | 1.96430e-07 | 0.999998 |
| rad71                         | 1.71761e-07 | 0.999998 | 1.71783e-07 | 0.999998 |
| rad10                         | 1.68598e-07 | 0.999998 | 1.68619e-07 | 0.999998 |
| rad26                         | 1.64008e-07 | 0.999999 | 1.64029e-07 | 0.999998 |
| PAH8+H                        | 1.56814e-07 | 0.999999 | 1.56834e-07 | 0.999998 |
| rad13                         | 1.42708e-07 | 0.999999 | 1.42726e-07 | 0.999998 |
| rad22                         | 1.42529e-07 | 0.999999 | 1.42547e-07 | 0.999998 |
| rad73                         | 1.19915e-07 | 0.999999 | 1.19931e-07 | 0.999999 |
| rad65                         | 1.15385e-07 | 0.999999 | 1.15399e-07 | 0.999999 |
| rad19syn                      | 1.13957e-07 | 0.999999 | 1.13972e-07 | 0.999999 |
| rad41                         | 9.82339e-08 | 0.999999 | 9.82466e-08 | 0.999999 |
| rad28                         | 9.14114e-08 | 1.000000 | 9.14227e-08 | 0.999999 |
| rad62                         | 7.45010e-08 | 1.000000 | 7.45104e-08 | 0.999999 |
| rad20                         | 7.40796e-08 | 1.000000 | 7.40889e-08 | 0.999999 |
| rad56                         | 6.61881e-08 | 1.000000 | 6.61964e-08 | 0.999999 |
| rad53                         | 6.00791e-08 | 1.000000 | 6.00867e-08 | 0.999999 |
| rad68syn                      | 2.82023e-08 | 1.000000 | 2.82059e-08 | 0.999999 |
| rad64                         | 2.37751e-08 | 1.000000 | 2.37782e-08 | 0.999999 |
| rad40syn                      | 2.32073e-08 | 1.000000 | 2.32102e-08 | 0.999999 |
| rad18                         | 2.02088e-08 | 1.000000 | 2.02114e-08 | 0.999999 |
| rad40anti                     | 1.86033e-08 | 1.000000 | 1.86056e-08 | 0.999999 |
| rad68anti                     | 1.83246e-08 | 1.000000 | 1.83269e-08 | 0.999999 |
| rad24                         | 1.80768e-08 | 1.000000 | 1.80791e-08 | 0.999999 |
| rad33                         | 1.19299e-08 | 1.000000 | 1.19314e-08 | 0.999999 |
| rad3                          | 1.01163e-08 | 1.000000 | 1.01176e-08 | 0.999999 |
| rad4                          | 8.00420e-09 | 1.000000 | 8.00521e-09 | 0.999999 |
| rad42                         | 6.37532e-09 | 1.000000 | 6.37613e-09 | 0.999999 |
| rad72                         | 6.01653e-09 | 1.000000 | 6.01729e-09 | 0.999999 |
| rad25                         | 3.04091e-09 | 1.000000 | 3.04129e-09 | 0.999999 |
| rad27                         | 1.54435e-09 | 1.000000 | 1.54454e-09 | 0.999999 |
| rad47                         | 4.40034e-10 | 1.000000 | 4.40090e-10 | 0.999999 |
| rad31                         | 2.98872e-10 | 1.000000 | 2.98909e-10 | 0.999999 |

|       |             |         |             |          |
|-------|-------------|---------|-------------|----------|
| rad14 | 1.63929e-10 | 1.00000 | 1.63950e-10 | 0.999999 |
| rad5  | 9.93372e-12 | 1.00000 | 9.93491e-12 | 0.999999 |

10000.0000 Pa, 1300.00000 K

=====

| Rate constant             | True (fraction)       | Effective (fraction)  |
|---------------------------|-----------------------|-----------------------|
| Total                     | 4.84401e-12 (1.00 )   | 4.84262e-12 (1.00 )   |
| Formation of rad19        | 3.55537e-12 (0.734 )  | 3.55411e-12 (0.734 )  |
| H-abstraction to cyc2enyl | 9.48893e-13 (0.196 )  | 9.48893e-13 (0.196 )  |
| H-abstraction to cyc1enyl | 3.39740e-13 (0.0701 ) | 3.39620e-13 (0.0701 ) |

| species                       | PYtrue      | Cumul    | PYeffective | Cumul    |
|-------------------------------|-------------|----------|-------------|----------|
| Indene+H                      | 0.544980    | 0.544980 | 0.545135    | 0.545135 |
| Benzene+cycloprop-2-enylidene | 0.195890    | 0.740870 | 0.195946    | 0.741081 |
| PhCHCCH2+H                    | 0.142840    | 0.883710 | 0.142881    | 0.883962 |
| Benzene+cycloprop-1-enylidene | 0.0701362   | 0.953846 | 0.0701313   | 0.954093 |
| rad9                          | 0.0194704   | 0.973317 | 0.0194760   | 0.973569 |
| Ph+MeAc                       | 0.00497340  | 0.978290 | 0.00497482  | 0.978544 |
| Ph+Allene                     | 0.00483791  | 0.983128 | 0.00483929  | 0.983383 |
| C2H2+PhCH2                    | 0.00476692  | 0.987895 | 0.00476828  | 0.988151 |
| PhCH2CCH+H                    | 0.00342090  | 0.991316 | 0.00342188  | 0.991573 |
| PhCCCH3+H                     | 0.00193497  | 0.993251 | 0.00193552  | 0.993509 |
| rad67                         | 0.00191607  | 0.995167 | 0.00191662  | 0.995426 |
| PhCCH+CH3                     | 0.00128831  | 0.996455 | 0.00128868  | 0.996714 |
| PhcycC3H3_A+H                 | 0.000878655 | 0.997334 | 0.000878902 | 0.997593 |
| PhcycC3H3_B+H                 | 0.000799650 | 0.998133 | 0.000799880 | 0.998393 |
| rad35                         | 0.000692597 | 0.998826 | 0.000692795 | 0.999086 |
| Phenyl+cycC3H4                | 0.000260616 | 0.999087 | 0.000000    | 0.999086 |
| PAH10+CH3                     | 0.000241422 | 0.999328 | 0.000241491 | 0.999327 |
| rad37                         | 0.000134313 | 0.999462 | 0.000134351 | 0.999462 |
| PAH7+H                        | 0.000124440 | 0.999587 | 0.000124475 | 0.999586 |
| PAH9+H                        | 6.65208e-05 | 0.999653 | 6.65398e-05 | 0.999653 |
| rad15                         | 6.14628e-05 | 0.999715 | 6.14804e-05 | 0.999714 |
| rad38                         | 5.29818e-05 | 0.999768 | 5.29970e-05 | 0.999767 |
| PAH3+H                        | 4.58647e-05 | 0.999814 | 4.58778e-05 | 0.999813 |
| rad12                         | 4.58458e-05 | 0.999860 | 4.58589e-05 | 0.999859 |
| rad30                         | 2.91542e-05 | 0.999889 | 2.91625e-05 | 0.999888 |
| rad6                          | 2.89340e-05 | 0.999918 | 2.89422e-05 | 0.999917 |
| rad39                         | 2.13046e-05 | 0.999939 | 2.13107e-05 | 0.999938 |
| rad50                         | 1.13635e-05 | 0.999950 | 1.13667e-05 | 0.999950 |
| rad46                         | 1.07464e-05 | 0.999961 | 1.07495e-05 | 0.999960 |
| PAH1+H                        | 4.74943e-06 | 0.999966 | 4.75078e-06 | 0.999965 |
| rad59                         | 4.28955e-06 | 0.999970 | 4.29078e-06 | 0.999969 |
| rad51                         | 3.61067e-06 | 0.999974 | 3.61169e-06 | 0.999973 |
| rad60syn                      | 3.32966e-06 | 0.999977 | 3.33061e-06 | 0.999976 |
| rad45                         | 3.09906e-06 | 0.999980 | 3.09993e-06 | 0.999979 |
| rad23                         | 2.66311e-06 | 0.999983 | 2.66386e-06 | 0.999982 |
| rad54                         | 2.57048e-06 | 0.999985 | 2.57121e-06 | 0.999985 |
| rad60anti                     | 2.09091e-06 | 0.999987 | 2.09151e-06 | 0.999987 |
| rad19anti                     | 1.56678e-06 | 0.999989 | 1.56723e-06 | 0.999988 |
| rad11                         | 1.45876e-06 | 0.999990 | 1.45918e-06 | 0.999990 |
| rad70                         | 1.12806e-06 | 0.999992 | 1.12838e-06 | 0.999991 |
| rad43                         | 1.12241e-06 | 0.999993 | 1.12274e-06 | 0.999992 |
| rad52                         | 1.02568e-06 | 0.999994 | 1.02598e-06 | 0.999993 |
| rad2                          | 9.70460e-07 | 0.999995 | 9.70737e-07 | 0.999994 |
| rad7                          | 6.01764e-07 | 0.999995 | 6.01936e-07 | 0.999995 |
| rad58                         | 5.19998e-07 | 0.999996 | 5.20146e-07 | 0.999995 |
| rad8                          | 4.79670e-07 | 0.999996 | 4.79807e-07 | 0.999996 |
| rad61                         | 4.40780e-07 | 0.999997 | 4.40905e-07 | 0.999996 |
| rad10                         | 3.71521e-07 | 0.999997 | 3.71628e-07 | 0.999996 |
| rad21                         | 3.64618e-07 | 0.999997 | 3.64721e-07 | 0.999997 |
| rad36                         | 2.99075e-07 | 0.999998 | 2.99161e-07 | 0.999997 |
| rad34                         | 2.97273e-07 | 0.999998 | 2.97358e-07 | 0.999997 |
| rad1                          | 2.66904e-07 | 0.999998 | 2.66980e-07 | 0.999998 |
| rad13                         | 2.25635e-07 | 0.999999 | 2.25700e-07 | 0.999998 |
| rad26                         | 2.03523e-07 | 0.999999 | 2.03581e-07 | 0.999998 |
| rad55                         | 1.91214e-07 | 0.999999 | 1.91268e-07 | 0.999998 |
| rad22                         | 1.78424e-07 | 0.999999 | 1.78475e-07 | 0.999998 |
| rad71                         | 1.45626e-07 | 0.999999 | 1.45667e-07 | 0.999999 |
| PAH8+H                        | 1.33572e-07 | 0.999999 | 1.33611e-07 | 0.999999 |
| rad73                         | 1.02074e-07 | 1.000000 | 1.02103e-07 | 0.999999 |
| rad65                         | 1.00834e-07 | 1.000000 | 1.00863e-07 | 0.999999 |
| rad19syn                      | 1.00708e-07 | 1.000000 | 1.00737e-07 | 0.999999 |
| rad20                         | 9.70541e-08 | 1.000000 | 9.70818e-08 | 0.999999 |
| rad41                         | 8.89987e-08 | 1.000000 | 8.90241e-08 | 0.999999 |
| rad28                         | 7.31184e-08 | 1.000000 | 7.31393e-08 | 0.999999 |
| rad62                         | 7.18921e-08 | 1.000000 | 7.19127e-08 | 0.999999 |
| rad56                         | 5.97689e-08 | 1.000000 | 5.97859e-08 | 0.999999 |

|           |             |         |             |          |
|-----------|-------------|---------|-------------|----------|
| rad53     | 5.55404e-08 | 1.00000 | 5.55563e-08 | 1.000000 |
| rad18     | 4.55968e-08 | 1.00000 | 4.56098e-08 | 1.000000 |
| rad68syn  | 2.45817e-08 | 1.00000 | 2.45888e-08 | 1.000000 |
| rad64     | 2.15873e-08 | 1.00000 | 2.15935e-08 | 1.000000 |
| rad24     | 2.04241e-08 | 1.00000 | 2.04300e-08 | 1.000000 |
| rad40syn  | 1.99355e-08 | 1.00000 | 1.99412e-08 | 1.000000 |
| rad68anti | 1.59801e-08 | 1.00000 | 1.59846e-08 | 1.000000 |
| rad40anti | 1.59589e-08 | 1.00000 | 1.59634e-08 | 1.000000 |
| rad33     | 1.51123e-08 | 1.00000 | 1.51166e-08 | 1.000000 |
| rad3      | 8.18447e-09 | 1.00000 | 8.18683e-09 | 1.000000 |
| rad4      | 6.46124e-09 | 1.00000 | 6.46309e-09 | 1.000000 |
| rad25     | 6.03136e-09 | 1.00000 | 6.03309e-09 | 1.000000 |
| rad42     | 5.93506e-09 | 1.00000 | 5.93675e-09 | 1.000000 |
| rad72     | 5.07351e-09 | 1.00000 | 5.07496e-09 | 1.000000 |
| rad27     | 2.83865e-09 | 1.00000 | 2.83947e-09 | 1.000000 |
| rad47     | 3.61952e-10 | 1.00000 | 3.62056e-10 | 1.000000 |
| rad31     | 2.84885e-10 | 1.00000 | 2.84967e-10 | 1.000000 |
| rad14     | 2.67963e-10 | 1.00000 | 2.68039e-10 | 1.000000 |
| rad5      | 2.12408e-11 | 1.00000 | 2.12468e-11 | 1.000000 |

10000.0000 Pa, 1400.00000 K

| Rate constant             | True (fraction)       | Effective (fraction)  |
|---------------------------|-----------------------|-----------------------|
| Total                     | 6.19360e-12 (1.00 )   | 6.18997e-12 (1.00 )   |
| Formation of rad19        | 4.34185e-12 (0.701 )  | 4.33861e-12 (0.701 )  |
| H-abstraction to cyc2enyl | 1.32990e-12 (0.215 )  | 1.32990e-12 (0.215 )  |
| H-abstraction to cyclenyl | 5.21850e-13 (0.0843 ) | 5.21461e-13 (0.0842 ) |

| species                       | PYtrue      | Cumul    | PYeffective | Cumul    |
|-------------------------------|-------------|----------|-------------|----------|
| Indene+H                      | 0.511190    | 0.511190 | 0.511490    | 0.511490 |
| Benzene+cycloprop-2-enylidene | 0.214721    | 0.725911 | 0.214847    | 0.726337 |
| PhCHCCH2+H                    | 0.146948    | 0.872859 | 0.147035    | 0.873372 |
| Benzene+cycloprop-1-enylidene | 0.0842564   | 0.957116 | 0.0842429   | 0.957615 |
| rad9                          | 0.0142598   | 0.971376 | 0.0142682   | 0.971883 |
| Ph+MeAc                       | 0.00512153  | 0.976497 | 0.00512453  | 0.977007 |
| Ph+Allene                     | 0.00502365  | 0.981521 | 0.00502659  | 0.982034 |
| C2H2+PhCH2                    | 0.00489213  | 0.986413 | 0.00489500  | 0.986929 |
| PhCH2CCH+H                    | 0.00350274  | 0.989916 | 0.00350479  | 0.990434 |
| PhCCCH3+H                     | 0.00199556  | 0.991911 | 0.00199673  | 0.992430 |
| rad67                         | 0.00197412  | 0.993885 | 0.00197528  | 0.994406 |
| PhcycC3H3_A+H                 | 0.00135231  | 0.995238 | 0.00135310  | 0.995759 |
| PhCCH+CH3                     | 0.00130436  | 0.996542 | 0.00130513  | 0.997064 |
| PhcycC3H3_B+H                 | 0.00126490  | 0.997807 | 0.00126564  | 0.998330 |
| rad35                         | 0.000712772 | 0.998520 | 0.000713190 | 0.999043 |
| Phenyl+cycC3H4                | 0.000523428 | 0.999043 | 0.000000    | 0.999043 |
| PAH10+CH3                     | 0.000242920 | 0.999286 | 0.000243062 | 0.999286 |
| rad37                         | 0.000140063 | 0.999426 | 0.000140145 | 0.999426 |
| PAH7+H                        | 0.000127174 | 0.999553 | 0.000127248 | 0.999553 |
| rad15                         | 0.000104801 | 0.999658 | 0.000104863 | 0.999658 |
| PAH9+H                        | 6.54116e-05 | 0.999723 | 6.54500e-05 | 0.999724 |
| rad38                         | 5.29194e-05 | 0.999776 | 5.29504e-05 | 0.999776 |
| PAH3+H                        | 4.46997e-05 | 0.999821 | 4.47259e-05 | 0.999821 |
| rad12                         | 3.97710e-05 | 0.999861 | 3.97943e-05 | 0.999861 |
| rad30                         | 2.98902e-05 | 0.999891 | 2.99078e-05 | 0.999891 |
| rad6                          | 2.63486e-05 | 0.999917 | 2.63641e-05 | 0.999917 |
| rad39                         | 2.13497e-05 | 0.999938 | 2.13623e-05 | 0.999939 |
| rad50                         | 1.05193e-05 | 0.999949 | 1.05255e-05 | 0.999949 |
| rad46                         | 1.03780e-05 | 0.999959 | 1.03841e-05 | 0.999960 |
| PAH1+H                        | 4.61001e-06 | 0.999964 | 4.61272e-06 | 0.999964 |
| rad59                         | 4.22212e-06 | 0.999968 | 4.22460e-06 | 0.999968 |
| rad60syn                      | 3.34012e-06 | 0.999971 | 3.34208e-06 | 0.999972 |
| rad51                         | 3.25094e-06 | 0.999975 | 3.25284e-06 | 0.999975 |
| rad45                         | 2.93291e-06 | 0.999978 | 2.93463e-06 | 0.999978 |
| rad23                         | 2.81931e-06 | 0.999980 | 2.82097e-06 | 0.999981 |
| rad54                         | 2.69064e-06 | 0.999983 | 2.69222e-06 | 0.999983 |
| rad11                         | 2.44569e-06 | 0.999986 | 2.44713e-06 | 0.999986 |
| rad60anti                     | 2.09374e-06 | 0.999988 | 2.09497e-06 | 0.999988 |
| rad19anti                     | 1.21754e-06 | 0.999989 | 1.21825e-06 | 0.999989 |
| rad43                         | 1.12727e-06 | 0.999990 | 1.12793e-06 | 0.999990 |
| rad70                         | 1.11421e-06 | 0.999991 | 1.11487e-06 | 0.999991 |
| rad7                          | 9.89921e-07 | 0.999992 | 9.90498e-07 | 0.999992 |
| rad52                         | 9.37064e-07 | 0.999993 | 9.37614e-07 | 0.999993 |
| rad2                          | 7.99313e-07 | 0.999994 | 7.99780e-07 | 0.999994 |
| rad10                         | 7.19964e-07 | 0.999995 | 7.20381e-07 | 0.999995 |
| rad8                          | 6.01948e-07 | 0.999995 | 6.02301e-07 | 0.999995 |
| rad58                         | 4.87232e-07 | 0.999996 | 4.87519e-07 | 0.999996 |
| rad21                         | 4.24557e-07 | 0.999996 | 4.24806e-07 | 0.999996 |
| rad61                         | 4.12704e-07 | 0.999996 | 4.12946e-07 | 0.999997 |

|           |             |          |             |          |
|-----------|-------------|----------|-------------|----------|
| rad26     | 3.27444e-07 | 0.999997 | 3.27636e-07 | 0.999997 |
| rad34     | 2.88439e-07 | 0.999997 | 2.88609e-07 | 0.999997 |
| rad36     | 2.83214e-07 | 0.999997 | 2.83380e-07 | 0.999998 |
| rad13     | 2.58163e-07 | 0.999998 | 2.58315e-07 | 0.999998 |
| rad1      | 2.20786e-07 | 0.999998 | 2.20916e-07 | 0.999998 |
| rad22     | 2.10799e-07 | 0.999998 | 2.10922e-07 | 0.999998 |
| rad55     | 1.98786e-07 | 0.999998 | 1.98903e-07 | 0.999999 |
| rad71     | 1.22556e-07 | 0.999998 | 1.22628e-07 | 0.999999 |
| PAH8+H    | 1.16984e-07 | 0.999999 | 1.17053e-07 | 0.999999 |
| rad20     | 1.05828e-07 | 0.999999 | 1.05891e-07 | 0.999999 |
| rad18     | 9.24277e-08 | 0.999999 | 9.24816e-08 | 0.999999 |
| rad65     | 9.11897e-08 | 0.999999 | 9.12431e-08 | 0.999999 |
| rad19syn  | 8.90607e-08 | 0.999999 | 8.91130e-08 | 0.999999 |
| rad73     | 8.69674e-08 | 0.999999 | 8.70187e-08 | 0.999999 |
| rad41     | 8.58584e-08 | 0.999999 | 8.59084e-08 | 0.999999 |
| rad62     | 7.32330e-08 | 0.999999 | 7.32759e-08 | 0.999999 |
| rad28     | 6.82116e-08 | 0.999999 | 6.82517e-08 | 1.000000 |
| rad56     | 5.79722e-08 | 0.999999 | 5.80062e-08 | 1.000000 |
| rad53     | 5.53132e-08 | 0.999999 | 5.53457e-08 | 1.000000 |
| rad68syn  | 2.24551e-08 | 0.999999 | 2.24684e-08 | 1.000000 |
| rad24     | 2.14372e-08 | 0.999999 | 2.14497e-08 | 1.000000 |
| rad64     | 2.08156e-08 | 0.999999 | 2.08278e-08 | 1.000000 |
| rad40syn  | 1.77609e-08 | 0.999999 | 1.77714e-08 | 1.000000 |
| rad33     | 1.55283e-08 | 0.999999 | 1.55374e-08 | 1.000000 |
| rad68anti | 1.46094e-08 | 0.999999 | 1.46180e-08 | 1.000000 |
| rad40anti | 1.41827e-08 | 0.999999 | 1.41910e-08 | 1.000000 |
| rad25     | 8.27690e-09 | 0.999999 | 8.28174e-09 | 1.000000 |
| rad3      | 6.45067e-09 | 0.999999 | 6.45446e-09 | 1.000000 |
| rad42     | 5.88001e-09 | 0.999999 | 5.88346e-09 | 1.000000 |
| rad4      | 5.07586e-09 | 0.999999 | 5.07884e-09 | 1.000000 |
| rad72     | 4.18128e-09 | 0.999999 | 4.18374e-09 | 1.000000 |
| rad27     | 3.73729e-09 | 0.999999 | 3.73948e-09 | 1.000000 |
| rad14     | 3.30771e-10 | 0.999999 | 3.30965e-10 | 1.000000 |
| rad47     | 3.06542e-10 | 0.999999 | 3.06722e-10 | 1.000000 |
| rad31     | 2.72006e-10 | 0.999999 | 2.72166e-10 | 1.000000 |
| rad5      | 7.49982e-11 | 0.999999 | 7.50422e-11 | 1.000000 |

10000.0000 Pa, 1500.00000 K

=====

| Rate constant             | True (fraction)       | Effective (fraction)  |
|---------------------------|-----------------------|-----------------------|
| Total                     | 7.80417e-12 (1.00 )   | 7.79561e-12 (1.00 )   |
| Formation of rad19        | 5.22661e-12 (0.670 )  | 5.21915e-12 (0.669 )  |
| H-abstraction to cyc2enyl | 1.80920e-12 (0.232 )  | 1.80920e-12 (0.232 )  |
| H-abstraction to cyc1enyl | 7.68359e-13 (0.0985 ) | 7.67262e-13 (0.0984 ) |

| species                       | PYtrue      | Cumul    | PYeffective | Cumul    |
|-------------------------------|-------------|----------|-------------|----------|
| Indene+H                      | 0.471299    | 0.471299 | 0.471816    | 0.471816 |
| Benzene+cycloprop-2-enylidene | 0.231825    | 0.703124 | 0.232079    | 0.703896 |
| PhCHCCH2+H                    | 0.155887    | 0.859011 | 0.156057    | 0.859953 |
| Benzene+cycloprop-1-enylidene | 0.0984549   | 0.957465 | 0.0984223   | 0.958375 |
| rad9                          | 0.0101731   | 0.967638 | 0.0101842   | 0.968559 |
| Ph+MeAc                       | 0.00545517  | 0.973094 | 0.00546116  | 0.974021 |
| Ph+Allene                     | 0.00540302  | 0.978497 | 0.00540896  | 0.979430 |
| C2H2+PhCH2                    | 0.00520497  | 0.983702 | 0.00521068  | 0.984640 |
| PhCH2CCH+H                    | 0.00379417  | 0.987496 | 0.00379834  | 0.988439 |
| rad67                         | 0.00211441  | 0.989610 | 0.00211674  | 0.990555 |
| PhCCCH3+H                     | 0.00210849  | 0.991719 | 0.00211080  | 0.992666 |
| PhcycC3H3_A+H                 | 0.00208945  | 0.993808 | 0.00209175  | 0.994758 |
| PhcycC3H3_B+H                 | 0.00205144  | 0.995860 | 0.00205369  | 0.996812 |
| PhCCH+CH3                     | 0.00137179  | 0.997231 | 0.00137330  | 0.998185 |
| Phenyl+cycC3H4                | 0.000956200 | 0.998188 | 0.000000    | 0.998185 |
| rad35                         | 0.000763126 | 0.998951 | 0.000763965 | 0.998949 |
| PAH10+CH3                     | 0.000266103 | 0.999217 | 0.000266396 | 0.999215 |
| rad37                         | 0.000151225 | 0.999368 | 0.000151391 | 0.999367 |
| rad15                         | 0.000142039 | 0.999510 | 0.000142195 | 0.999509 |
| PAH7+H                        | 0.000134095 | 0.999644 | 0.000134243 | 0.999643 |
| PAH9+H                        | 7.01673e-05 | 0.999714 | 7.02438e-05 | 0.999713 |
| rad38                         | 5.72054e-05 | 0.999772 | 5.72682e-05 | 0.999771 |
| PAH3+H                        | 4.82387e-05 | 0.999820 | 4.82917e-05 | 0.999819 |
| rad12                         | 3.31397e-05 | 0.999853 | 3.31761e-05 | 0.999852 |
| rad30                         | 3.22494e-05 | 0.999885 | 3.22848e-05 | 0.999884 |
| rad6                          | 2.75187e-05 | 0.999913 | 2.75489e-05 | 0.999912 |
| rad39                         | 2.20993e-05 | 0.999935 | 2.21235e-05 | 0.999934 |
| rad46                         | 1.10424e-05 | 0.999946 | 1.10546e-05 | 0.999945 |
| rad50                         | 1.09083e-05 | 0.999957 | 1.09203e-05 | 0.999956 |
| PAH1+H                        | 4.98885e-06 | 0.999962 | 4.99433e-06 | 0.999961 |
| rad59                         | 4.57189e-06 | 0.999966 | 4.57690e-06 | 0.999966 |
| rad60syn                      | 3.62645e-06 | 0.999970 | 3.63044e-06 | 0.999969 |

|           |             |          |             |          |
|-----------|-------------|----------|-------------|----------|
| rad23     | 3.29543e-06 | 0.999973 | 3.29905e-06 | 0.999973 |
| rad51     | 3.29496e-06 | 0.999976 | 3.29858e-06 | 0.999976 |
| rad11     | 3.09960e-06 | 0.999980 | 3.10300e-06 | 0.999979 |
| rad54     | 2.98260e-06 | 0.999983 | 2.98588e-06 | 0.999982 |
| rad45     | 2.73384e-06 | 0.999985 | 2.73685e-06 | 0.999985 |
| rad60anti | 2.27310e-06 | 0.999988 | 2.27560e-06 | 0.999987 |
| rad7      | 1.27275e-06 | 0.999989 | 1.27414e-06 | 0.999988 |
| rad43     | 1.22833e-06 | 0.999990 | 1.22967e-06 | 0.999989 |
| rad70     | 1.21003e-06 | 0.999991 | 1.21136e-06 | 0.999991 |
| rad10     | 1.06621e-06 | 0.999992 | 1.06739e-06 | 0.999992 |
| rad52     | 9.61933e-07 | 0.999993 | 9.62993e-07 | 0.999993 |
| rad19anti | 9.58510e-07 | 0.999994 | 9.59565e-07 | 0.999994 |
| rad8      | 6.57229e-07 | 0.999995 | 6.57951e-07 | 0.999994 |
| rad2      | 6.41745e-07 | 0.999996 | 6.42450e-07 | 0.999995 |
| rad26     | 5.99446e-07 | 0.999996 | 6.00104e-07 | 0.999996 |
| rad58     | 5.16190e-07 | 0.999997 | 5.16756e-07 | 0.999996 |
| rad21     | 4.45492e-07 | 0.999997 | 4.45981e-07 | 0.999996 |
| rad61     | 4.39537e-07 | 0.999998 | 4.40019e-07 | 0.999997 |
| rad34     | 3.11410e-07 | 0.999998 | 3.11752e-07 | 0.999997 |
| rad36     | 2.64581e-07 | 0.999998 | 2.64871e-07 | 0.999997 |
| rad22     | 2.44915e-07 | 0.999998 | 2.45184e-07 | 0.999998 |
| rad13     | 2.43800e-07 | 0.999999 | 2.44068e-07 | 0.999998 |
| rad55     | 2.21294e-07 | 0.999999 | 2.21538e-07 | 0.999998 |
| rad1      | 1.78486e-07 | 0.999999 | 1.78682e-07 | 0.999998 |
| rad18     | 1.41881e-07 | 0.999999 | 1.42037e-07 | 0.999999 |
| PAH8+H    | 1.17614e-07 | 0.999999 | 1.17743e-07 | 0.999999 |
| rad71     | 1.14641e-07 | 0.999999 | 1.14767e-07 | 0.999999 |
| rad20     | 1.04855e-07 | 1.000000 | 1.04971e-07 | 0.999999 |
| rad65     | 9.29438e-08 | 1.000000 | 9.30455e-08 | 0.999999 |
| rad41     | 9.25647e-08 | 1.000000 | 9.26659e-08 | 0.999999 |
| rad73     | 8.28263e-08 | 1.000000 | 8.29174e-08 | 0.999999 |
| rad62     | 7.94898e-08 | 1.000000 | 7.95772e-08 | 0.999999 |
| rad19syn  | 7.89915e-08 | 1.000000 | 7.90785e-08 | 0.999999 |
| rad28     | 7.43999e-08 | 1.000000 | 7.44810e-08 | 0.999999 |
| rad56     | 6.39002e-08 | 1.000000 | 6.39703e-08 | 0.999999 |
| rad53     | 6.15228e-08 | 1.000000 | 6.15904e-08 | 0.999999 |
| rad68syn  | 2.34199e-08 | 1.000000 | 2.34456e-08 | 1.000000 |
| rad64     | 2.24239e-08 | 1.000000 | 2.24485e-08 | 1.000000 |
| rad24     | 2.19946e-08 | 1.000000 | 2.20187e-08 | 1.000000 |
| rad40syn  | 1.81518e-08 | 1.000000 | 1.81718e-08 | 1.000000 |
| rad68anti | 1.52464e-08 | 1.000000 | 1.52632e-08 | 1.000000 |
| rad40anti | 1.44627e-08 | 1.000000 | 1.44786e-08 | 1.000000 |
| rad33     | 1.41922e-08 | 1.000000 | 1.42078e-08 | 1.000000 |
| rad25     | 9.26538e-09 | 1.000000 | 9.27556e-09 | 1.000000 |
| rad42     | 6.39175e-09 | 1.000000 | 6.39877e-09 | 1.000000 |
| rad3      | 4.96774e-09 | 1.000000 | 4.97319e-09 | 1.000000 |
| rad27     | 4.08265e-09 | 1.000000 | 4.08713e-09 | 1.000000 |
| rad4      | 3.89105e-09 | 1.000000 | 3.89532e-09 | 1.000000 |
| rad72     | 3.77543e-09 | 1.000000 | 3.77958e-09 | 1.000000 |
| rad5      | 3.63751e-10 | 1.000000 | 3.64150e-10 | 1.000000 |
| rad14     | 3.42851e-10 | 1.000000 | 3.43227e-10 | 1.000000 |
| rad47     | 2.93266e-10 | 1.000000 | 2.93588e-10 | 1.000000 |
| rad31     | 2.58894e-10 | 1.000000 | 2.59178e-10 | 1.000000 |

1000.00000 Pa, 20.0000000 K

| Rate constant             | True (fraction)         | Effective (fraction)    |
|---------------------------|-------------------------|-------------------------|
| Total                     | 1.24541e-22 (1.00 )     | 1.24541e-22 (1.00 )     |
| Formation of rad19        | 1.24541e-22 (1.00 )     | 1.24541e-22 (1.00 )     |
| H-abstraction to cyc2enyl | 3.84323e-68 (3.09e-46)  | 3.84323e-68 (3.09e-46)  |
| H-abstraction to cyclenyl | 6.26313e-106 (5.03e-84) | 6.26313e-106 (5.03e-84) |

| species    | PYtrue      | Cumul    | PYeffective | Cumul    |
|------------|-------------|----------|-------------|----------|
| rad9       | 0.982279    | 0.982279 | 0.982279    | 0.982279 |
| Indene+H   | 0.0152977   | 0.997577 | 0.0152977   | 0.997577 |
| rad15      | 0.00242171  | 0.999998 | 0.00242171  | 0.999998 |
| PhCHCCH2+H | 1.61398e-06 | 1.000000 | 1.61398e-06 | 1.000000 |
| rad2       | 5.94208e-08 | 1.000000 | 5.94208e-08 | 1.000000 |
| rad6       | 5.32302e-08 | 1.000000 | 5.32302e-08 | 1.000000 |
| rad11      | 2.22624e-08 | 1.000000 | 2.22624e-08 | 1.000000 |
| rad19anti  | 1.95189e-08 | 1.000000 | 1.95189e-08 | 1.000000 |
| rad12      | 1.93666e-08 | 1.000000 | 1.93666e-08 | 1.000000 |
| rad26      | 9.47150e-09 | 1.000000 | 9.47150e-09 | 1.000000 |
| rad22      | 8.48715e-09 | 1.000000 | 8.48715e-09 | 1.000000 |
| C2H2+PhCH2 | 5.40221e-09 | 1.000000 | 5.40221e-09 | 1.000000 |
| rad23      | 4.02199e-09 | 1.000000 | 4.02199e-09 | 1.000000 |
| rad1       | 3.82283e-09 | 1.000000 | 3.82283e-09 | 1.000000 |
| rad67      | 2.79382e-09 | 1.000000 | 2.79382e-09 | 1.000000 |

|                               |             |         |             |         |
|-------------------------------|-------------|---------|-------------|---------|
| rad45                         | 2.33230e-09 | 1.00000 | 2.33230e-09 | 1.00000 |
| rad10                         | 2.18682e-09 | 1.00000 | 2.18682e-09 | 1.00000 |
| rad35                         | 1.26439e-09 | 1.00000 | 1.26439e-09 | 1.00000 |
| rad3                          | 4.59329e-10 | 1.00000 | 4.59329e-10 | 1.00000 |
| rad18                         | 2.43766e-10 | 1.00000 | 2.43766e-10 | 1.00000 |
| rad4                          | 2.33622e-10 | 1.00000 | 2.33622e-10 | 1.00000 |
| PhCCCH3+H                     | 1.75533e-10 | 1.00000 | 1.75533e-10 | 1.00000 |
| rad36                         | 1.43497e-10 | 1.00000 | 1.43497e-10 | 1.00000 |
| Ph+MeAc                       | 1.04247e-10 | 1.00000 | 1.04247e-10 | 1.00000 |
| PhCCH+CH3                     | 9.81727e-11 | 1.00000 | 9.81727e-11 | 1.00000 |
| rad7                          | 4.98497e-11 | 1.00000 | 4.98497e-11 | 1.00000 |
| Ph+Allene                     | 2.83821e-11 | 1.00000 | 2.83821e-11 | 1.00000 |
| rad30                         | 2.07918e-11 | 1.00000 | 2.07918e-11 | 1.00000 |
| rad20                         | 1.51781e-11 | 1.00000 | 1.51781e-11 | 1.00000 |
| rad21                         | 1.03939e-11 | 1.00000 | 1.03939e-11 | 1.00000 |
| rad5                          | 8.28201e-12 | 1.00000 | 8.28201e-12 | 1.00000 |
| PhCH2CCH+H                    | 4.38661e-12 | 1.00000 | 4.38661e-12 | 1.00000 |
| rad25                         | 7.47331e-13 | 1.00000 | 7.47331e-13 | 1.00000 |
| rad27                         | 5.10231e-13 | 1.00000 | 5.10231e-13 | 1.00000 |
| rad13                         | 4.91521e-13 | 1.00000 | 4.91521e-13 | 1.00000 |
| PhcycC3H3_A+H                 | 3.84872e-13 | 1.00000 | 3.84872e-13 | 1.00000 |
| rad14                         | 1.93721e-13 | 1.00000 | 1.93721e-13 | 1.00000 |
| rad28                         | 1.57689e-13 | 1.00000 | 1.57689e-13 | 1.00000 |
| rad37                         | 8.09064e-14 | 1.00000 | 8.09064e-14 | 1.00000 |
| rad60syn                      | 7.36119e-14 | 1.00000 | 7.36119e-14 | 1.00000 |
| rad60anti                     | 3.53838e-14 | 1.00000 | 3.53838e-14 | 1.00000 |
| PAH3+H                        | 2.43098e-14 | 1.00000 | 2.43098e-14 | 1.00000 |
| PAH7+H                        | 1.41052e-14 | 1.00000 | 1.41052e-14 | 1.00000 |
| rad59                         | 5.15760e-15 | 1.00000 | 5.15760e-15 | 1.00000 |
| rad38                         | 4.53183e-15 | 1.00000 | 4.53183e-15 | 1.00000 |
| PAH9+H                        | 2.94203e-15 | 1.00000 | 2.94203e-15 | 1.00000 |
| rad33                         | 6.98175e-16 | 1.00000 | 6.98175e-16 | 1.00000 |
| rad46                         | 2.46695e-16 | 1.00000 | 2.46695e-16 | 1.00000 |
| rad24                         | 8.29915e-17 | 1.00000 | 8.29915e-17 | 1.00000 |
| PAH10+CH3                     | 5.11577e-17 | 1.00000 | 5.11577e-17 | 1.00000 |
| Phenyl+cycC3H4                | 2.77435e-17 | 1.00000 | 0.00000     | 1.00000 |
| rad43                         | 8.07362e-18 | 1.00000 | 8.07362e-18 | 1.00000 |
| rad39                         | 2.60224e-18 | 1.00000 | 2.60224e-18 | 1.00000 |
| rad31                         | 1.11666e-18 | 1.00000 | 1.11666e-18 | 1.00000 |
| rad50                         | 9.92388e-19 | 1.00000 | 9.92388e-19 | 1.00000 |
| rad70                         | 3.93540e-19 | 1.00000 | 3.93540e-19 | 1.00000 |
| rad62                         | 2.85938e-19 | 1.00000 | 2.85938e-19 | 1.00000 |
| rad58                         | 1.81507e-19 | 1.00000 | 1.81507e-19 | 1.00000 |
| rad54                         | 2.02181e-20 | 1.00000 | 2.02181e-20 | 1.00000 |
| rad52                         | 4.87045e-21 | 1.00000 | 4.87045e-21 | 1.00000 |
| rad34                         | 2.87052e-21 | 1.00000 | 2.87052e-21 | 1.00000 |
| PAH1+H                        | 1.43739e-21 | 1.00000 | 1.43739e-21 | 1.00000 |
| rad51                         | 9.42632e-22 | 1.00000 | 9.42632e-22 | 1.00000 |
| PhcycC3H3_B+H                 | 2.62862e-22 | 1.00000 | 2.62862e-22 | 1.00000 |
| rad55                         | 1.01803e-22 | 1.00000 | 1.01803e-22 | 1.00000 |
| rad41                         | 4.50764e-23 | 1.00000 | 4.50764e-23 | 1.00000 |
| rad42                         | 6.85501e-24 | 1.00000 | 6.85501e-24 | 1.00000 |
| rad65                         | 3.04301e-24 | 1.00000 | 3.04301e-24 | 1.00000 |
| rad47                         | 1.76222e-25 | 1.00000 | 1.76222e-25 | 1.00000 |
| rad53                         | 1.09028e-30 | 1.00000 | 1.09028e-30 | 1.00000 |
| rad61                         | 6.33340e-34 | 1.00000 | 6.33340e-34 | 1.00000 |
| rad64                         | 2.05786e-34 | 1.00000 | 2.05786e-34 | 1.00000 |
| rad19syn                      | 1.43952e-36 | 1.00000 | 1.43952e-36 | 1.00000 |
| rad68syn                      | 7.32561e-37 | 1.00000 | 7.32561e-37 | 1.00000 |
| rad68anti                     | 6.01065e-37 | 1.00000 | 6.01065e-37 | 1.00000 |
| rad56                         | 1.02072e-37 | 1.00000 | 1.02072e-37 | 1.00000 |
| rad40syn                      | 2.56661e-42 | 1.00000 | 2.56661e-42 | 1.00000 |
| rad40anti                     | 2.03146e-42 | 1.00000 | 2.03146e-42 | 1.00000 |
| rad73                         | 1.11936e-43 | 1.00000 | 1.11936e-43 | 1.00000 |
| rad8                          | 5.55843e-44 | 1.00000 | 5.55843e-44 | 1.00000 |
| PAH8+H                        | 2.84369e-45 | 1.00000 | 2.84369e-45 | 1.00000 |
| Benzene+cycloprop-2-enylidene | 3.08591e-46 | 1.00000 | 3.08591e-46 | 1.00000 |
| rad71                         | 1.94839e-49 | 1.00000 | 1.94839e-49 | 1.00000 |
| Benzene+cycloprop-1-enylidene | 5.02895e-84 | 1.00000 | 5.02895e-84 | 1.00000 |

1000.00000 Pa, 30.0000000 K

=====

| Rate constant             | True (fraction)        | Effective (fraction)   |
|---------------------------|------------------------|------------------------|
| Total                     | 8.13009e-20 (1.00 )    | 8.13009e-20 (1.00 )    |
| Formation of rad19        | 8.13009e-20 (1.00 )    | 8.13009e-20 (1.00 )    |
| H-abstraction to cyc2enyl | 1.08880e-49 (1.34e-30) | 1.08880e-49 (1.34e-30) |
| H-abstraction to cyclenyl | 7.55172e-75 (9.29e-56) | 7.55172e-75 (9.29e-56) |

| species | PYtrue | Cumul | PYeffective | Cumul |
|---------|--------|-------|-------------|-------|
|---------|--------|-------|-------------|-------|

|                               |             |          |             |          |
|-------------------------------|-------------|----------|-------------|----------|
| rad9                          | 0.966757    | 0.966757 | 0.966757    | 0.966757 |
| Indene+H                      | 0.0311564   | 0.997913 | 0.0311564   | 0.997913 |
| rad15                         | 0.00208282  | 0.999996 | 0.00208282  | 0.999996 |
| PhCHCCH2+H                    | 3.29241e-06 | 1.000000 | 3.29241e-06 | 1.000000 |
| rad6                          | 1.34459e-07 | 1.000000 | 1.34459e-07 | 1.000000 |
| rad2                          | 1.16679e-07 | 1.000000 | 1.16679e-07 | 1.000000 |
| rad26                         | 1.92802e-08 | 1.000000 | 1.92802e-08 | 1.000000 |
| rad11                         | 1.63291e-08 | 1.000000 | 1.63291e-08 | 1.000000 |
| rad12                         | 1.32235e-08 | 1.000000 | 1.32235e-08 | 1.000000 |
| C2H2+PhCH2                    | 1.23564e-08 | 1.000000 | 1.23564e-08 | 1.000000 |
| rad19anti                     | 1.18449e-08 | 1.000000 | 1.18449e-08 | 1.000000 |
| rad23                         | 1.15124e-08 | 1.000000 | 1.15124e-08 | 1.000000 |
| rad1                          | 7.44465e-09 | 1.000000 | 7.44465e-09 | 1.000000 |
| rad22                         | 7.30119e-09 | 1.000000 | 7.30119e-09 | 1.000000 |
| rad10                         | 7.25645e-09 | 1.000000 | 7.25645e-09 | 1.000000 |
| rad67                         | 5.99019e-09 | 1.000000 | 5.99019e-09 | 1.000000 |
| rad45                         | 3.74584e-09 | 1.000000 | 3.74584e-09 | 1.000000 |
| rad35                         | 2.70658e-09 | 1.000000 | 2.70658e-09 | 1.000000 |
| rad3                          | 1.27505e-09 | 1.000000 | 1.27505e-09 | 1.000000 |
| PhCCCH3+H                     | 7.12816e-10 | 1.000000 | 7.12816e-10 | 1.000000 |
| rad4                          | 6.46410e-10 | 1.000000 | 6.46410e-10 | 1.000000 |
| PhCCH+CH3                     | 6.09061e-10 | 1.000000 | 6.09061e-10 | 1.000000 |
| Ph+MeAc                       | 4.28515e-10 | 1.000000 | 4.28515e-10 | 1.000000 |
| rad36                         | 2.30065e-10 | 1.000000 | 2.30065e-10 | 1.000000 |
| rad7                          | 1.25696e-10 | 1.000000 | 1.25696e-10 | 1.000000 |
| Ph+Allene                     | 8.24920e-11 | 1.000000 | 8.24920e-11 | 1.000000 |
| rad18                         | 6.76837e-11 | 1.000000 | 6.76837e-11 | 1.000000 |
| rad30                         | 4.58870e-11 | 1.000000 | 4.58870e-11 | 1.000000 |
| rad5                          | 1.46988e-11 | 1.000000 | 1.46988e-11 | 1.000000 |
| PhCH2CCH+H                    | 1.30520e-11 | 1.000000 | 1.30520e-11 | 1.000000 |
| rad20                         | 4.55387e-12 | 1.000000 | 4.55387e-12 | 1.000000 |
| rad21                         | 3.07412e-12 | 1.000000 | 3.07412e-12 | 1.000000 |
| rad28                         | 9.04281e-13 | 1.000000 | 9.04281e-13 | 1.000000 |
| rad13                         | 8.67226e-13 | 1.000000 | 8.67226e-13 | 1.000000 |
| rad27                         | 7.34188e-13 | 1.000000 | 7.34188e-13 | 1.000000 |
| rad14                         | 4.94048e-13 | 1.000000 | 4.94048e-13 | 1.000000 |
| rad25                         | 4.43342e-13 | 1.000000 | 4.43342e-13 | 1.000000 |
| PhcycC3H3_A+H                 | 4.20664e-13 | 1.000000 | 4.20664e-13 | 1.000000 |
| rad37                         | 3.38563e-13 | 1.000000 | 3.38563e-13 | 1.000000 |
| rad60syn                      | 1.67181e-13 | 1.000000 | 1.67181e-13 | 1.000000 |
| rad60anti                     | 8.05424e-14 | 1.000000 | 8.05424e-14 | 1.000000 |
| PAH3+H                        | 5.67640e-14 | 1.000000 | 5.67640e-14 | 1.000000 |
| PAH7+H                        | 4.43234e-14 | 1.000000 | 4.43234e-14 | 1.000000 |
| PAH9+H                        | 2.12180e-14 | 1.000000 | 2.12180e-14 | 1.000000 |
| rad38                         | 1.97969e-14 | 1.000000 | 1.97969e-14 | 1.000000 |
| rad59                         | 1.20016e-14 | 1.000000 | 1.20016e-14 | 1.000000 |
| rad33                         | 1.14313e-15 | 1.000000 | 1.14313e-15 | 1.000000 |
| rad46                         | 1.10062e-15 | 1.000000 | 1.10062e-15 | 1.000000 |
| PAH10+CH3                     | 2.18286e-16 | 1.000000 | 2.18286e-16 | 1.000000 |
| rad24                         | 9.33308e-17 | 1.000000 | 9.33308e-17 | 1.000000 |
| Phenyl+cycC3H4                | 5.25665e-17 | 1.000000 | 0.00000     | 1.000000 |
| rad43                         | 3.58060e-17 | 1.000000 | 3.58060e-17 | 1.000000 |
| rad39                         | 3.12159e-17 | 1.000000 | 3.12159e-17 | 1.000000 |
| rad50                         | 4.66359e-18 | 1.000000 | 4.66359e-18 | 1.000000 |
| rad62                         | 2.29745e-18 | 1.000000 | 2.29745e-18 | 1.000000 |
| rad31                         | 2.28664e-18 | 1.000000 | 2.28664e-18 | 1.000000 |
| rad70                         | 1.40126e-18 | 1.000000 | 1.40126e-18 | 1.000000 |
| rad58                         | 4.55759e-19 | 1.000000 | 4.55759e-19 | 1.000000 |
| rad54                         | 1.33094e-19 | 1.000000 | 1.33094e-19 | 1.000000 |
| rad52                         | 2.35577e-20 | 1.000000 | 2.35577e-20 | 1.000000 |
| rad34                         | 1.07617e-20 | 1.000000 | 1.07617e-20 | 1.000000 |
| PAH1+H                        | 6.33484e-21 | 1.000000 | 6.33484e-21 | 1.000000 |
| rad51                         | 4.68642e-21 | 1.000000 | 4.68642e-21 | 1.000000 |
| rad55                         | 6.88529e-22 | 1.000000 | 6.88529e-22 | 1.000000 |
| rad41                         | 2.18888e-22 | 1.000000 | 2.18888e-22 | 1.000000 |
| PhcycC3H3_B+H                 | 2.05993e-22 | 1.000000 | 2.05993e-22 | 1.000000 |
| rad42                         | 6.09898e-23 | 1.000000 | 6.09898e-23 | 1.000000 |
| rad65                         | 2.56806e-23 | 1.000000 | 2.56806e-23 | 1.000000 |
| rad47                         | 3.15234e-25 | 1.000000 | 3.15234e-25 | 1.000000 |
| rad53                         | 7.70182e-30 | 1.000000 | 7.70182e-30 | 1.000000 |
| Benzene+cycloprop-2-enylidene | 1.33923e-30 | 1.000000 | 1.33923e-30 | 1.000000 |
| rad61                         | 3.36245e-33 | 1.000000 | 3.36245e-33 | 1.000000 |
| rad64                         | 2.70779e-33 | 1.000000 | 2.70779e-33 | 1.000000 |
| rad68syn                      | 2.31526e-36 | 1.000000 | 2.31526e-36 | 1.000000 |
| rad68anti                     | 1.89996e-36 | 1.000000 | 1.89996e-36 | 1.000000 |
| rad19syn                      | 8.58166e-37 | 1.000000 | 8.58166e-37 | 1.000000 |
| rad56                         | 6.67556e-37 | 1.000000 | 6.67556e-37 | 1.000000 |
| rad40syn                      | 1.27737e-41 | 1.000000 | 1.27737e-41 | 1.000000 |
| rad40anti                     | 1.01462e-41 | 1.000000 | 1.01462e-41 | 1.000000 |

|                               |             |          |             |          |
|-------------------------------|-------------|----------|-------------|----------|
| rad73                         | 5.92987e-43 | 1.000000 | 5.92987e-43 | 1.000000 |
| PAH8+H                        | 1.32563e-44 | 1.000000 | 1.32563e-44 | 1.000000 |
| rad8                          | 3.20655e-46 | 1.000000 | 3.20655e-46 | 1.000000 |
| rad71                         | 1.02833e-48 | 1.000000 | 1.02833e-48 | 1.000000 |
| Benzene+cycloprop-1-enylidene | 9.28861e-56 | 1.000000 | 9.28861e-56 | 1.000000 |

1000.00000 Pa, 40.0000000 K

| Rate constant             | True (fraction)        | Effective (fraction)   |
|---------------------------|------------------------|------------------------|
| Total                     | 2.24819e-18 (1.00 )    | 2.24819e-18 (1.00 )    |
| Formation of rad19        | 2.24819e-18 (1.00 )    | 2.24819e-18 (1.00 )    |
| H-abstraction to cyc2enyl | 1.72361e-40 (7.67e-23) | 1.72361e-40 (7.67e-23) |
| H-abstraction to cyclenyl | 2.48792e-59 (1.11e-41) | 2.48792e-59 (1.11e-41) |

| species        | PYtrue      | Cumul    | PYeffective | Cumul    |
|----------------|-------------|----------|-------------|----------|
| rad9           | 0.951824    | 0.951824 | 0.951824    | 0.951824 |
| Indene+H       | 0.0462645   | 0.998089 | 0.0462645   | 0.998089 |
| rad15          | 0.00190552  | 0.999994 | 0.00190552  | 0.999994 |
| PhCHCCH2+H     | 4.96401e-06 | 0.999999 | 4.96401e-06 | 0.999999 |
| rad6           | 2.15045e-07 | 0.999999 | 2.15045e-07 | 0.999999 |
| rad2           | 1.71009e-07 | 0.999999 | 1.71009e-07 | 0.999999 |
| rad26          | 2.90298e-08 | 0.999999 | 2.90298e-08 | 0.999999 |
| C2H2+PhCH2     | 1.94718e-08 | 0.999999 | 1.94718e-08 | 0.999999 |
| rad23          | 1.88703e-08 | 0.999999 | 1.88703e-08 | 0.999999 |
| rad10          | 1.35037e-08 | 0.999999 | 1.35037e-08 | 0.999999 |
| rad11          | 1.12372e-08 | 0.999999 | 1.12372e-08 | 0.999999 |
| rad12          | 1.09460e-08 | 0.999999 | 1.09460e-08 | 0.999999 |
| rad1           | 1.08908e-08 | 0.999999 | 1.08908e-08 | 0.999999 |
| rad67          | 9.22662e-09 | 0.999999 | 9.22662e-09 | 0.999999 |
| rad19anti      | 9.07448e-09 | 1.000000 | 9.07448e-09 | 1.000000 |
| rad22          | 5.43030e-09 | 1.000000 | 5.43030e-09 | 1.000000 |
| rad45          | 4.76407e-09 | 1.000000 | 4.76407e-09 | 1.000000 |
| rad35          | 4.16348e-09 | 1.000000 | 4.16348e-09 | 1.000000 |
| rad3           | 2.10728e-09 | 1.000000 | 2.10728e-09 | 1.000000 |
| PhCCH+CH3      | 1.63114e-09 | 1.000000 | 1.63114e-09 | 1.000000 |
| PhCCCH3+H      | 1.59221e-09 | 1.000000 | 1.59221e-09 | 1.000000 |
| rad4           | 1.06736e-09 | 1.000000 | 1.06736e-09 | 1.000000 |
| Ph+MeAc        | 9.67102e-10 | 1.000000 | 9.67102e-10 | 1.000000 |
| rad36          | 2.92358e-10 | 1.000000 | 2.92358e-10 | 1.000000 |
| rad7           | 1.94830e-10 | 1.000000 | 1.94830e-10 | 1.000000 |
| Ph+Allene      | 1.44752e-10 | 1.000000 | 1.44752e-10 | 1.000000 |
| rad30          | 7.12782e-11 | 1.000000 | 7.12782e-11 | 1.000000 |
| rad18          | 3.08592e-11 | 1.000000 | 3.08592e-11 | 1.000000 |
| PhCH2CCH+H     | 2.33173e-11 | 1.000000 | 2.33173e-11 | 1.000000 |
| rad5           | 1.96453e-11 | 1.000000 | 1.96453e-11 | 1.000000 |
| rad28          | 2.35370e-12 | 1.000000 | 2.35370e-12 | 1.000000 |
| rad20          | 2.01376e-12 | 1.000000 | 2.01376e-12 | 1.000000 |
| rad21          | 1.34491e-12 | 1.000000 | 1.34491e-12 | 1.000000 |
| rad13          | 1.14217e-12 | 1.000000 | 1.14217e-12 | 1.000000 |
| rad27          | 9.11844e-13 | 1.000000 | 9.11844e-13 | 1.000000 |
| rad37          | 7.77250e-13 | 1.000000 | 7.77250e-13 | 1.000000 |
| rad14          | 7.54599e-13 | 1.000000 | 7.54599e-13 | 1.000000 |
| PhcycC3H3_A+H  | 4.80519e-13 | 1.000000 | 4.80519e-13 | 1.000000 |
| rad25          | 2.72944e-13 | 1.000000 | 2.72944e-13 | 1.000000 |
| rad60syn       | 2.64019e-13 | 1.000000 | 2.64019e-13 | 1.000000 |
| rad60anti      | 1.27372e-13 | 1.000000 | 1.27372e-13 | 1.000000 |
| PAH3+H         | 9.12615e-14 | 1.000000 | 9.12615e-14 | 1.000000 |
| PAH7+H         | 8.08385e-14 | 1.000000 | 8.08385e-14 | 1.000000 |
| PAH9+H         | 5.97745e-14 | 1.000000 | 5.97745e-14 | 1.000000 |
| rad38          | 4.43454e-14 | 1.000000 | 4.43454e-14 | 1.000000 |
| rad59          | 1.92496e-14 | 1.000000 | 1.92496e-14 | 1.000000 |
| rad46          | 2.49263e-15 | 1.000000 | 2.49263e-15 | 1.000000 |
| rad33          | 1.46048e-15 | 1.000000 | 1.46048e-15 | 1.000000 |
| PAH10+CH3      | 5.17072e-16 | 1.000000 | 5.17072e-16 | 1.000000 |
| rad39          | 1.26484e-16 | 1.000000 | 1.26484e-16 | 1.000000 |
| Phenyl+cycC3H4 | 1.15739e-16 | 1.000000 | 0.000000    | 1.000000 |
| rad24          | 9.99306e-17 | 1.000000 | 9.99306e-17 | 1.000000 |
| rad43          | 8.49132e-17 | 1.000000 | 8.49132e-17 | 1.000000 |
| rad50          | 1.09429e-17 | 1.000000 | 1.09429e-17 | 1.000000 |
| rad62          | 7.10357e-18 | 1.000000 | 7.10357e-18 | 1.000000 |
| rad31          | 3.43498e-18 | 1.000000 | 3.43498e-18 | 1.000000 |
| rad70          | 2.79737e-18 | 1.000000 | 2.79737e-18 | 1.000000 |
| rad58          | 7.76507e-19 | 1.000000 | 7.76507e-19 | 1.000000 |
| rad54          | 3.81619e-19 | 1.000000 | 3.81619e-19 | 1.000000 |
| rad52          | 5.65102e-20 | 1.000000 | 5.65102e-20 | 1.000000 |
| rad34          | 2.26026e-20 | 1.000000 | 2.26026e-20 | 1.000000 |
| PAH1+H         | 1.58408e-20 | 1.000000 | 1.58408e-20 | 1.000000 |
| rad51          | 1.15079e-20 | 1.000000 | 1.15079e-20 | 1.000000 |



|                               |             |          |             |          |
|-------------------------------|-------------|----------|-------------|----------|
| rad55                         | 2.03419e-21 | 1.000000 | 2.03419e-21 | 1.000000 |
| rad41                         | 5.86304e-22 | 1.000000 | 5.86304e-22 | 1.000000 |
| PhcycC3H3_B+H                 | 3.54004e-22 | 1.000000 | 3.54004e-22 | 1.000000 |
| rad42                         | 2.13345e-22 | 1.000000 | 2.13345e-22 | 1.000000 |
| rad65                         | 8.21978e-23 | 1.000000 | 8.21978e-23 | 1.000000 |
| Benzene+cycloprop-2-enylidene | 7.66665e-23 | 1.000000 | 7.66665e-23 | 1.000000 |
| rad47                         | 4.26810e-25 | 1.000000 | 4.26810e-25 | 1.000000 |
| rad53                         | 2.99604e-29 | 1.000000 | 2.99604e-29 | 1.000000 |
| rad64                         | 1.54375e-32 | 1.000000 | 1.54375e-32 | 1.000000 |
| rad61                         | 1.29114e-32 | 1.000000 | 1.29114e-32 | 1.000000 |
| rad68syn                      | 6.85814e-36 | 1.000000 | 6.85814e-36 | 1.000000 |
| rad68anti                     | 5.62534e-36 | 1.000000 | 5.62534e-36 | 1.000000 |
| rad56                         | 2.83598e-36 | 1.000000 | 2.83598e-36 | 1.000000 |
| rad19syn                      | 8.74800e-37 | 1.000000 | 8.74800e-37 | 1.000000 |
| rad40syn                      | 5.36872e-41 | 1.000000 | 5.36872e-41 | 1.000000 |
| rad40anti                     | 4.26972e-41 | 1.000000 | 4.26972e-41 | 1.000000 |
| Benzene+cycloprop-1-enylidene | 1.10663e-41 | 1.000000 | 1.10663e-41 | 1.000000 |
| rad73                         | 2.47863e-42 | 1.000000 | 2.47863e-42 | 1.000000 |
| PAH8+H                        | 5.57705e-44 | 1.000000 | 5.57705e-44 | 1.000000 |
| rad8                          | 3.66801e-47 | 1.000000 | 3.66801e-47 | 1.000000 |
| rad71                         | 4.62861e-48 | 1.000000 | 4.62861e-48 | 1.000000 |

1000.00000 Pa, 50.0000000 K

| Rate constant             | True (fraction)        | Effective (fraction)   |
|---------------------------|------------------------|------------------------|
| Total                     | 1.72707e-17 (1.00 )    | 1.72707e-17 (1.00 )    |
| Formation of rad19        | 1.72707e-17 (1.00 )    | 1.72707e-17 (1.00 )    |
| H-abstraction to cyc2enyl | 5.49905e-35 (3.18e-18) | 5.49905e-35 (3.18e-18) |
| H-abstraction to cyclenyl | 4.93090e-50 (2.86e-33) | 4.93090e-50 (2.86e-33) |

| species       | PYtrue      | Cumul    | PYeffective | Cumul    |
|---------------|-------------|----------|-------------|----------|
| rad9          | 0.937329    | 0.937329 | 0.937329    | 0.937329 |
| Indene+H      | 0.0608785   | 0.998207 | 0.0608785   | 0.998207 |
| rad15         | 0.00178546  | 0.999993 | 0.00178546  | 0.999993 |
| PhCHCCH2+H    | 6.67013e-06 | 1.000000 | 6.67013e-06 | 1.000000 |
| rad6          | 2.96105e-07 | 1.000000 | 2.96105e-07 | 1.000000 |
| rad2          | 2.24617e-07 | 1.000000 | 2.24617e-07 | 1.000000 |
| rad26         | 3.89788e-08 | 1.000000 | 3.89788e-08 | 1.000000 |
| C2H2+PhCH2    | 2.68590e-08 | 1.000000 | 2.68590e-08 | 1.000000 |
| rad23         | 2.58166e-08 | 1.000000 | 2.58166e-08 | 1.000000 |
| rad10         | 2.03108e-08 | 1.000000 | 2.03108e-08 | 1.000000 |
| rad1          | 1.43065e-08 | 1.000000 | 1.43065e-08 | 1.000000 |
| rad67         | 1.25909e-08 | 1.000000 | 1.25909e-08 | 1.000000 |
| rad12         | 9.69042e-09 | 1.000000 | 9.69042e-09 | 1.000000 |
| rad11         | 8.05853e-09 | 1.000000 | 8.05853e-09 | 1.000000 |
| rad19anti     | 7.58235e-09 | 1.000000 | 7.58235e-09 | 1.000000 |
| rad35         | 5.67386e-09 | 1.000000 | 5.67386e-09 | 1.000000 |
| rad45         | 5.64662e-09 | 1.000000 | 5.64662e-09 | 1.000000 |
| rad22         | 4.07519e-09 | 1.000000 | 4.07519e-09 | 1.000000 |
| PhCCH+CH3     | 3.21170e-09 | 1.000000 | 3.21170e-09 | 1.000000 |
| rad3          | 2.91879e-09 | 1.000000 | 2.91879e-09 | 1.000000 |
| PhCCCH3+H     | 2.83394e-09 | 1.000000 | 2.83394e-09 | 1.000000 |
| Ph+MeAc       | 1.73818e-09 | 1.000000 | 1.73818e-09 | 1.000000 |
| rad4          | 1.47805e-09 | 1.000000 | 1.47805e-09 | 1.000000 |
| rad36         | 3.46287e-10 | 1.000000 | 3.46287e-10 | 1.000000 |
| rad7          | 2.56724e-10 | 1.000000 | 2.56724e-10 | 1.000000 |
| Ph+Allene     | 2.13616e-10 | 1.000000 | 2.13616e-10 | 1.000000 |
| rad30         | 9.76081e-11 | 1.000000 | 9.76081e-11 | 1.000000 |
| PhCH2CCH+H    | 3.49396e-11 | 1.000000 | 3.49396e-11 | 1.000000 |
| rad5          | 2.36331e-11 | 1.000000 | 2.36331e-11 | 1.000000 |
| rad18         | 1.73210e-11 | 1.000000 | 1.73210e-11 | 1.000000 |
| rad28         | 4.57952e-12 | 1.000000 | 4.57952e-12 | 1.000000 |
| rad37         | 1.42036e-12 | 1.000000 | 1.42036e-12 | 1.000000 |
| rad13         | 1.38011e-12 | 1.000000 | 1.38011e-12 | 1.000000 |
| rad20         | 1.07381e-12 | 1.000000 | 1.07381e-12 | 1.000000 |
| rad27         | 1.07270e-12 | 1.000000 | 1.07270e-12 | 1.000000 |
| rad14         | 9.82912e-13 | 1.000000 | 9.82912e-13 | 1.000000 |
| rad21         | 7.11601e-13 | 1.000000 | 7.11601e-13 | 1.000000 |
| PhcycC3H3_A+H | 5.64106e-13 | 1.000000 | 5.64106e-13 | 1.000000 |
| rad60syn      | 3.66921e-13 | 1.000000 | 3.66921e-13 | 1.000000 |
| rad25         | 1.82078e-13 | 1.000000 | 1.82078e-13 | 1.000000 |
| rad60anti     | 1.77239e-13 | 1.000000 | 1.77239e-13 | 1.000000 |
| PAH3+H        | 1.28991e-13 | 1.000000 | 1.28991e-13 | 1.000000 |
| PAH7+H        | 1.22820e-13 | 1.000000 | 1.22820e-13 | 1.000000 |
| PAH9+H        | 1.20701e-13 | 1.000000 | 1.20701e-13 | 1.000000 |
| rad38         | 7.82325e-14 | 1.000000 | 7.82325e-14 | 1.000000 |
| rad59         | 2.71447e-14 | 1.000000 | 2.71447e-14 | 1.000000 |
| rad46         | 4.43379e-15 | 1.000000 | 4.43379e-15 | 1.000000 |

|                               |             |         |             |         |
|-------------------------------|-------------|---------|-------------|---------|
| rad33                         | 1.73561e-15 | 1.00000 | 1.73561e-15 | 1.00000 |
| PAH10+CH3                     | 9.82827e-16 | 1.00000 | 9.82827e-16 | 1.00000 |
| rad39                         | 3.40542e-16 | 1.00000 | 3.40542e-16 | 1.00000 |
| Phenyl+cycC3H4                | 2.36666e-16 | 1.00000 | 0.00000     | 1.00000 |
| rad43                         | 1.60219e-16 | 1.00000 | 1.60219e-16 | 1.00000 |
| rad24                         | 1.06210e-16 | 1.00000 | 1.06210e-16 | 1.00000 |
| rad50                         | 2.00871e-17 | 1.00000 | 2.00871e-17 | 1.00000 |
| rad62                         | 1.56770e-17 | 1.00000 | 1.56770e-17 | 1.00000 |
| rad70                         | 4.59880e-18 | 1.00000 | 4.59880e-18 | 1.00000 |
| rad31                         | 4.59781e-18 | 1.00000 | 4.59781e-18 | 1.00000 |
| Benzene+cycloprop-2-enylidene | 3.18404e-18 | 1.00000 | 3.18404e-18 | 1.00000 |
| rad58                         | 1.16532e-18 | 1.00000 | 1.16532e-18 | 1.00000 |
| rad54                         | 8.10661e-19 | 1.00000 | 8.10661e-19 | 1.00000 |
| rad52                         | 1.05944e-19 | 1.00000 | 1.05944e-19 | 1.00000 |
| rad34                         | 3.91532e-20 | 1.00000 | 3.91532e-20 | 1.00000 |
| PAH1+H                        | 3.22254e-20 | 1.00000 | 3.22254e-20 | 1.00000 |
| rad51                         | 2.20908e-20 | 1.00000 | 2.20908e-20 | 1.00000 |
| rad55                         | 4.46315e-21 | 1.00000 | 4.46315e-21 | 1.00000 |
| rad41                         | 1.27836e-21 | 1.00000 | 1.27836e-21 | 1.00000 |
| PhcycC3H3_B+H                 | 1.21255e-21 | 1.00000 | 1.21255e-21 | 1.00000 |
| rad42                         | 5.40151e-22 | 1.00000 | 5.40151e-22 | 1.00000 |
| rad65                         | 1.87239e-22 | 1.00000 | 1.87239e-22 | 1.00000 |
| rad47                         | 5.31356e-25 | 1.00000 | 5.31356e-25 | 1.00000 |
| rad53                         | 1.00648e-28 | 1.00000 | 1.00648e-28 | 1.00000 |
| rad64                         | 6.91007e-32 | 1.00000 | 6.91007e-32 | 1.00000 |
| rad61                         | 4.81074e-32 | 1.00000 | 4.81074e-32 | 1.00000 |
| Benzene+cycloprop-1-enylidene | 2.85507e-33 | 1.00000 | 2.85507e-33 | 1.00000 |
| rad68syn                      | 2.25460e-35 | 1.00000 | 2.25460e-35 | 1.00000 |
| rad68anti                     | 1.84783e-35 | 1.00000 | 1.84783e-35 | 1.00000 |
| rad56                         | 1.14710e-35 | 1.00000 | 1.14710e-35 | 1.00000 |
| rad19syn                      | 1.17076e-36 | 1.00000 | 1.17076e-36 | 1.00000 |
| rad40syn                      | 2.45122e-40 | 1.00000 | 2.45122e-40 | 1.00000 |
| rad40anti                     | 1.95064e-40 | 1.00000 | 1.95064e-40 | 1.00000 |
| rad73                         | 1.08306e-41 | 1.00000 | 1.08306e-41 | 1.00000 |
| PAH8+H                        | 2.65215e-43 | 1.00000 | 2.65215e-43 | 1.00000 |
| rad71                         | 2.30537e-47 | 1.00000 | 2.30537e-47 | 1.00000 |
| rad8                          | 1.10284e-47 | 1.00000 | 1.10284e-47 | 1.00000 |

1000.00000 Pa, 60.0000000 K

=====

| Rate constant             | True (fraction)        | Effective (fraction)   |
|---------------------------|------------------------|------------------------|
| Total                     | 6.93738e-17 (1.00 )    | 6.93738e-17 (1.00 )    |
| Formation of rad19        | 6.93738e-17 (1.000 )   | 6.93738e-17 (1.000 )   |
| H-abstraction to cyc2enyl | 2.50609e-31 (3.61e-15) | 2.50609e-31 (3.61e-15) |
| H-abstraction to cyclenyl | 7.62015e-44 (1.10e-27) | 7.62015e-44 (1.10e-27) |

| species    | PYtrue      | Cumul    | PYeffective | Cumul    |
|------------|-------------|----------|-------------|----------|
| rad9       | 0.923151    | 0.923151 | 0.923151    | 0.923151 |
| Indene+H   | 0.0751456   | 0.998297 | 0.0751456   | 0.998297 |
| rad15      | 0.00169413  | 0.999991 | 0.00169413  | 0.999991 |
| PhCHCCH2+H | 8.43255e-06 | 0.999999 | 8.43255e-06 | 0.999999 |
| rad6       | 3.79356e-07 | 1.000000 | 3.79356e-07 | 1.000000 |
| rad2       | 2.78468e-07 | 1.000000 | 2.78468e-07 | 1.000000 |
| rad26      | 4.92600e-08 | 1.000000 | 4.92600e-08 | 1.000000 |
| C2H2+PhCH2 | 3.46113e-08 | 1.000000 | 3.46113e-08 | 1.000000 |
| rad23      | 3.24231e-08 | 1.000000 | 3.24231e-08 | 1.000000 |
| rad10      | 2.74101e-08 | 1.000000 | 2.74101e-08 | 1.000000 |
| rad1       | 1.77558e-08 | 1.000000 | 1.77558e-08 | 1.000000 |
| rad67      | 1.61327e-08 | 1.000000 | 1.61327e-08 | 1.000000 |
| rad12      | 8.86807e-09 | 1.000000 | 8.86807e-09 | 1.000000 |
| rad35      | 7.25947e-09 | 1.000000 | 7.25947e-09 | 1.000000 |
| rad19anti  | 6.62621e-09 | 1.000000 | 6.62621e-09 | 1.000000 |
| rad45      | 6.45714e-09 | 1.000000 | 6.45714e-09 | 1.000000 |
| rad11      | 6.06506e-09 | 1.000000 | 6.06506e-09 | 1.000000 |
| PhCCH+CH3  | 5.40498e-09 | 1.000000 | 5.40498e-09 | 1.000000 |
| PhCCCH3+H  | 4.47480e-09 | 1.000000 | 4.47480e-09 | 1.000000 |
| rad3       | 3.71339e-09 | 1.000000 | 3.71339e-09 | 1.000000 |
| rad22      | 3.15758e-09 | 1.000000 | 3.15758e-09 | 1.000000 |
| Ph+MeAc    | 2.77076e-09 | 1.000000 | 2.77076e-09 | 1.000000 |
| rad4       | 1.88059e-09 | 1.000000 | 1.88059e-09 | 1.000000 |
| rad36      | 3.95778e-10 | 1.000000 | 3.95778e-10 | 1.000000 |
| rad7       | 3.15271e-10 | 1.000000 | 3.15271e-10 | 1.000000 |
| Ph+Allene  | 2.89531e-10 | 1.000000 | 2.89531e-10 | 1.000000 |
| rad30      | 1.25255e-10 | 1.000000 | 1.25255e-10 | 1.000000 |
| PhCH2CCH+H | 4.80125e-11 | 1.000000 | 4.80125e-11 | 1.000000 |
| rad5       | 2.68964e-11 | 1.000000 | 2.68964e-11 | 1.000000 |
| rad18      | 1.09497e-11 | 1.000000 | 1.09497e-11 | 1.000000 |
| rad28      | 7.67587e-12 | 1.000000 | 7.67587e-12 | 1.000000 |

|                               |             |         |             |         |
|-------------------------------|-------------|---------|-------------|---------|
| rad37                         | 2.30137e-12 | 1.00000 | 2.30137e-12 | 1.00000 |
| rad13                         | 1.60472e-12 | 1.00000 | 1.60472e-12 | 1.00000 |
| rad27                         | 1.22593e-12 | 1.00000 | 1.22593e-12 | 1.00000 |
| rad14                         | 1.19074e-12 | 1.00000 | 1.19074e-12 | 1.00000 |
| PhcycC3H3_A+H                 | 6.71911e-13 | 1.00000 | 6.71911e-13 | 1.00000 |
| rad20                         | 6.45991e-13 | 1.00000 | 6.45991e-13 | 1.00000 |
| rad60syn                      | 4.77707e-13 | 1.00000 | 4.77707e-13 | 1.00000 |
| rad21                         | 4.25586e-13 | 1.00000 | 4.25586e-13 | 1.00000 |
| rad60anti                     | 2.31045e-13 | 1.00000 | 2.31045e-13 | 1.00000 |
| PAH9+H                        | 2.06183e-13 | 1.00000 | 2.06183e-13 | 1.00000 |
| PAH7+H                        | 1.70826e-13 | 1.00000 | 1.70826e-13 | 1.00000 |
| PAH3+H                        | 1.70823e-13 | 1.00000 | 1.70823e-13 | 1.00000 |
| rad25                         | 1.30030e-13 | 1.00000 | 1.30030e-13 | 1.00000 |
| rad38                         | 1.22185e-13 | 1.00000 | 1.22185e-13 | 1.00000 |
| rad59                         | 3.58621e-14 | 1.00000 | 3.58621e-14 | 1.00000 |
| rad46                         | 6.97432e-15 | 1.00000 | 6.97432e-15 | 1.00000 |
| Benzene+cycloprop-2-enylidene | 3.61245e-15 | 1.00000 | 3.61245e-15 | 1.00000 |
| rad33                         | 1.99683e-15 | 1.00000 | 1.99683e-15 | 1.00000 |
| PAH10+CH3                     | 1.66513e-15 | 1.00000 | 1.66513e-15 | 1.00000 |
| rad39                         | 7.41652e-16 | 1.00000 | 7.41652e-16 | 1.00000 |
| Phenyl+cycC3H4                | 4.45916e-16 | 1.00000 | 0.00000     | 1.00000 |
| rad43                         | 2.68610e-16 | 1.00000 | 2.68610e-16 | 1.00000 |
| rad24                         | 1.12423e-16 | 1.00000 | 1.12423e-16 | 1.00000 |
| rad50                         | 3.25669e-17 | 1.00000 | 3.25669e-17 | 1.00000 |
| rad62                         | 2.92136e-17 | 1.00000 | 2.92136e-17 | 1.00000 |
| rad70                         | 6.87947e-18 | 1.00000 | 6.87947e-18 | 1.00000 |
| rad31                         | 5.80159e-18 | 1.00000 | 5.80159e-18 | 1.00000 |
| rad58                         | 1.64323e-18 | 1.00000 | 1.64323e-18 | 1.00000 |
| rad54                         | 1.47926e-18 | 1.00000 | 1.47926e-18 | 1.00000 |
| rad52                         | 1.75436e-19 | 1.00000 | 1.75436e-19 | 1.00000 |
| rad34                         | 6.17743e-20 | 1.00000 | 6.17743e-20 | 1.00000 |
| PAH1+H                        | 5.89486e-20 | 1.00000 | 5.89486e-20 | 1.00000 |
| rad51                         | 3.74833e-20 | 1.00000 | 3.74833e-20 | 1.00000 |
| PhcycC3H3_B+H                 | 1.74732e-20 | 1.00000 | 1.74732e-20 | 1.00000 |
| rad55                         | 8.42576e-21 | 1.00000 | 8.42576e-21 | 1.00000 |
| rad41                         | 2.50985e-21 | 1.00000 | 2.50985e-21 | 1.00000 |
| rad42                         | 1.16362e-21 | 1.00000 | 1.16362e-21 | 1.00000 |
| rad65                         | 3.59884e-22 | 1.00000 | 3.59884e-22 | 1.00000 |
| rad47                         | 6.36131e-25 | 1.00000 | 6.36131e-25 | 1.00000 |
| Benzene+cycloprop-1-enylidene | 1.09842e-27 | 1.00000 | 1.09842e-27 | 1.00000 |
| rad53                         | 3.27436e-28 | 1.00000 | 3.27436e-28 | 1.00000 |
| rad64                         | 2.85123e-31 | 1.00000 | 2.85123e-31 | 1.00000 |
| rad61                         | 1.87037e-31 | 1.00000 | 1.87037e-31 | 1.00000 |
| rad68syn                      | 8.37399e-35 | 1.00000 | 8.37399e-35 | 1.00000 |
| rad68anti                     | 6.85625e-35 | 1.00000 | 6.85625e-35 | 1.00000 |
| rad56                         | 4.82592e-35 | 1.00000 | 4.82592e-35 | 1.00000 |
| rad19syn                      | 1.82213e-36 | 1.00000 | 1.82213e-36 | 1.00000 |
| rad40syn                      | 1.25979e-39 | 1.00000 | 1.25979e-39 | 1.00000 |
| rad40anti                     | 1.00291e-39 | 1.00000 | 1.00291e-39 | 1.00000 |
| rad73                         | 5.21098e-41 | 1.00000 | 5.21098e-41 | 1.00000 |
| PAH8+H                        | 1.45781e-42 | 1.00000 | 1.45781e-42 | 1.00000 |
| rad71                         | 1.31625e-46 | 1.00000 | 1.31625e-46 | 1.00000 |
| rad8                          | 5.30004e-48 | 1.00000 | 5.30004e-48 | 1.00000 |

1000.00000 Pa, 70.0000000 K

=====

| Rate constant             | True (fraction)        | Effective (fraction)   |
|---------------------------|------------------------|------------------------|
| Total                     | 1.91520e-16 (1.00 )    | 1.91520e-16 (1.00 )    |
| Formation of rad19        | 1.91520e-16 (1.000 )   | 1.91520e-16 (1.000 )   |
| H-abstraction to cyc2enyl | 1.01125e-28 (5.28e-13) | 1.01125e-28 (5.28e-13) |
| H-abstraction to cyclenyl | 1.97822e-39 (1.03e-23) | 1.97822e-39 (1.03e-23) |

| species    | PYtrue      | Cumul    | PYeffective | Cumul    |
|------------|-------------|----------|-------------|----------|
| rad9       | 0.909197    | 0.909197 | 0.909197    | 0.909197 |
| Indene+H   | 0.0891722   | 0.998369 | 0.0891722   | 0.998369 |
| rad15      | 0.00161984  | 0.999989 | 0.00161984  | 0.999989 |
| PhCHCCH2+H | 1.02695e-05 | 0.999999 | 1.02695e-05 | 0.999999 |
| rad6       | 4.66135e-07 | 1.000000 | 4.66135e-07 | 1.000000 |
| rad2       | 3.33167e-07 | 1.000000 | 3.33167e-07 | 1.000000 |
| rad26      | 5.99818e-08 | 1.000000 | 5.99818e-08 | 1.000000 |
| C2H2+PhCH2 | 4.28212e-08 | 1.000000 | 4.28212e-08 | 1.000000 |
| rad23      | 3.87801e-08 | 1.000000 | 3.87801e-08 | 1.000000 |
| rad10      | 3.46904e-08 | 1.000000 | 3.46904e-08 | 1.000000 |
| rad1       | 2.12800e-08 | 1.000000 | 2.12800e-08 | 1.000000 |
| rad67      | 1.98964e-08 | 1.000000 | 1.98964e-08 | 1.000000 |
| rad35      | 8.93963e-09 | 1.000000 | 8.93963e-09 | 1.000000 |
| PhCCH+CH3  | 8.28410e-09 | 1.000000 | 8.28410e-09 | 1.000000 |
| rad12      | 8.27397e-09 | 1.000000 | 8.27397e-09 | 1.000000 |

|                               |             |         |             |         |
|-------------------------------|-------------|---------|-------------|---------|
| rad45                         | 7.21897e-09 | 1.00000 | 7.21897e-09 | 1.00000 |
| PhCCCH3+H                     | 6.56733e-09 | 1.00000 | 6.56733e-09 | 1.00000 |
| rad19anti                     | 5.95010e-09 | 1.00000 | 5.95010e-09 | 1.00000 |
| rad11                         | 4.76204e-09 | 1.00000 | 4.76204e-09 | 1.00000 |
| rad3                          | 4.50103e-09 | 1.00000 | 4.50103e-09 | 1.00000 |
| Ph+MeAc                       | 4.10521e-09 | 1.00000 | 4.10521e-09 | 1.00000 |
| rad22                         | 2.52816e-09 | 1.00000 | 2.52816e-09 | 1.00000 |
| rad4                          | 2.28014e-09 | 1.00000 | 2.28014e-09 | 1.00000 |
| rad36                         | 4.42289e-10 | 1.00000 | 4.42289e-10 | 1.00000 |
| Ph+Allene                     | 3.73590e-10 | 1.00000 | 3.73590e-10 | 1.00000 |
| rad7                          | 3.73016e-10 | 1.00000 | 3.73016e-10 | 1.00000 |
| rad30                         | 1.54558e-10 | 1.00000 | 1.54558e-10 | 1.00000 |
| PhCH2CCH+H                    | 6.27595e-11 | 1.00000 | 6.27595e-11 | 1.00000 |
| rad5                          | 2.95824e-11 | 1.00000 | 2.95824e-11 | 1.00000 |
| rad28                         | 1.17697e-11 | 1.00000 | 1.17697e-11 | 1.00000 |
| rad18                         | 7.48373e-12 | 1.00000 | 7.48373e-12 | 1.00000 |
| rad37                         | 3.46555e-12 | 1.00000 | 3.46555e-12 | 1.00000 |
| rad13                         | 1.82702e-12 | 1.00000 | 1.82702e-12 | 1.00000 |
| rad14                         | 1.38645e-12 | 1.00000 | 1.38645e-12 | 1.00000 |
| rad27                         | 1.37597e-12 | 1.00000 | 1.37597e-12 | 1.00000 |
| PhcycC3H3_A+H                 | 8.08299e-13 | 1.00000 | 8.08299e-13 | 1.00000 |
| rad60syn                      | 5.98165e-13 | 1.00000 | 5.98165e-13 | 1.00000 |
| Benzene+cycloprop-2-enylidene | 5.28015e-13 | 1.00000 | 5.28015e-13 | 1.00000 |
| rad20                         | 4.23302e-13 | 1.00000 | 4.23302e-13 | 1.00000 |
| PAH9+H                        | 3.19110e-13 | 1.00000 | 3.19110e-13 | 1.00000 |
| rad60anti                     | 2.89677e-13 | 1.00000 | 2.89677e-13 | 1.00000 |
| rad21                         | 2.77601e-13 | 1.00000 | 2.77601e-13 | 1.00000 |
| PAH7+H                        | 2.26004e-13 | 1.00000 | 2.26004e-13 | 1.00000 |
| PAH3+H                        | 2.17685e-13 | 1.00000 | 2.17685e-13 | 1.00000 |
| rad38                         | 1.77423e-13 | 1.00000 | 1.77423e-13 | 1.00000 |
| rad25                         | 9.80046e-14 | 1.00000 | 9.80046e-14 | 1.00000 |
| rad59                         | 4.55864e-14 | 1.00000 | 4.55864e-14 | 1.00000 |
| rad46                         | 1.01949e-14 | 1.00000 | 1.01949e-14 | 1.00000 |
| PAH10+CH3                     | 2.63349e-15 | 1.00000 | 2.63349e-15 | 1.00000 |
| rad33                         | 2.25672e-15 | 1.00000 | 2.25672e-15 | 1.00000 |
| rad39                         | 1.42232e-15 | 1.00000 | 1.42232e-15 | 1.00000 |
| Phenyl+cycC3H4                | 7.87799e-16 | 1.00000 | 0.00000     | 1.00000 |
| rad43                         | 4.19665e-16 | 1.00000 | 4.19665e-16 | 1.00000 |
| rad24                         | 1.18553e-16 | 1.00000 | 1.18553e-16 | 1.00000 |
| rad62                         | 4.93127e-17 | 1.00000 | 4.93127e-17 | 1.00000 |
| rad50                         | 4.90683e-17 | 1.00000 | 4.90683e-17 | 1.00000 |
| rad70                         | 9.75767e-18 | 1.00000 | 9.75767e-18 | 1.00000 |
| rad31                         | 7.06863e-18 | 1.00000 | 7.06863e-18 | 1.00000 |
| rad54                         | 2.46936e-18 | 1.00000 | 2.46936e-18 | 1.00000 |
| rad58                         | 2.23680e-18 | 1.00000 | 2.23680e-18 | 1.00000 |
| rad52                         | 2.70129e-19 | 1.00000 | 2.70129e-19 | 1.00000 |
| PhcycC3H3_B+H                 | 2.44078e-19 | 1.00000 | 2.44078e-19 | 1.00000 |
| PAH1+H                        | 1.01376e-19 | 1.00000 | 1.01376e-19 | 1.00000 |
| rad34                         | 9.25198e-20 | 1.00000 | 9.25198e-20 | 1.00000 |
| rad51                         | 5.92026e-20 | 1.00000 | 5.92026e-20 | 1.00000 |
| rad55                         | 1.45756e-20 | 1.00000 | 1.45756e-20 | 1.00000 |
| rad41                         | 4.63528e-21 | 1.00000 | 4.63528e-21 | 1.00000 |
| rad42                         | 2.28332e-21 | 1.00000 | 2.28332e-21 | 1.00000 |
| rad65                         | 6.26874e-22 | 1.00000 | 6.26874e-22 | 1.00000 |
| Benzene+cycloprop-1-enylidene | 1.03290e-23 | 1.00000 | 1.03290e-23 | 1.00000 |
| rad47                         | 7.45169e-25 | 1.00000 | 7.45169e-25 | 1.00000 |
| rad53                         | 1.08385e-27 | 1.00000 | 1.08385e-27 | 1.00000 |
| rad64                         | 1.16913e-30 | 1.00000 | 1.16913e-30 | 1.00000 |
| rad61                         | 7.96129e-31 | 1.00000 | 7.96129e-31 | 1.00000 |
| rad68syn                      | 3.59071e-34 | 1.00000 | 3.59071e-34 | 1.00000 |
| rad68anti                     | 2.93655e-34 | 1.00000 | 2.93655e-34 | 1.00000 |
| rad56                         | 2.22636e-34 | 1.00000 | 2.22636e-34 | 1.00000 |
| rad19syn                      | 3.10083e-36 | 1.00000 | 3.10083e-36 | 1.00000 |
| rad40syn                      | 7.46904e-39 | 1.00000 | 7.46904e-39 | 1.00000 |
| rad40anti                     | 5.94805e-39 | 1.00000 | 5.94805e-39 | 1.00000 |
| rad73                         | 2.85881e-40 | 1.00000 | 2.85881e-40 | 1.00000 |
| PAH8+H                        | 9.42364e-42 | 1.00000 | 9.42364e-42 | 1.00000 |
| rad71                         | 8.82092e-46 | 1.00000 | 8.82092e-46 | 1.00000 |
| rad8                          | 3.35041e-48 | 1.00000 | 3.35041e-48 | 1.00000 |

1000.00000 Pa, 80.0000000 K

| Rate constant             | True (fraction)        | Effective (fraction)   |             |       |
|---------------------------|------------------------|------------------------|-------------|-------|
| Total                     | 4.17084e-16 (1.00 )    | 4.17084e-16 (1.00 )    |             |       |
| Formation of rad19        | 4.17084e-16 (1.000 )   | 4.17084e-16 (1.000 )   |             |       |
| H-abstraction to cyc2enyl | 8.98751e-27 (2.15e-11) | 8.98751e-27 (2.15e-11) |             |       |
| H-abstraction to cyclenyl | 4.00120e-36 (9.59e-21) | 4.00120e-36 (9.59e-21) |             |       |
| species                   | PYtrue                 | Cumul                  | PYeffective | Cumul |

|                               |             |          |             |          |
|-------------------------------|-------------|----------|-------------|----------|
| rad9                          | 0.895385    | 0.895385 | 0.895385    | 0.895385 |
| Indene+H                      | 0.103045    | 0.998430 | 0.103045    | 0.998430 |
| rad15                         | 0.00155669  | 0.999987 | 0.00155669  | 0.999987 |
| PhCHCCH2+H                    | 1.21993e-05 | 0.999999 | 1.21993e-05 | 0.999999 |
| rad6                          | 5.57603e-07 | 0.999999 | 5.57603e-07 | 0.999999 |
| rad2                          | 3.89179e-07 | 1.000000 | 3.89179e-07 | 1.000000 |
| rad26                         | 7.12513e-08 | 1.000000 | 7.12513e-08 | 1.000000 |
| C2H2+PhCH2                    | 5.15890e-08 | 1.000000 | 5.15890e-08 | 1.000000 |
| rad23                         | 4.49613e-08 | 1.000000 | 4.49613e-08 | 1.000000 |
| rad10                         | 4.21170e-08 | 1.000000 | 4.21170e-08 | 1.000000 |
| rad1                          | 2.49121e-08 | 1.000000 | 2.49121e-08 | 1.000000 |
| rad67                         | 2.39292e-08 | 1.000000 | 2.39292e-08 | 1.000000 |
| PhCCH+CH3                     | 1.19467e-08 | 1.000000 | 1.19467e-08 | 1.000000 |
| rad35                         | 1.07347e-08 | 1.000000 | 1.07347e-08 | 1.000000 |
| PhCCCH3+H                     | 9.18190e-09 | 1.000000 | 9.18190e-09 | 1.000000 |
| rad45                         | 7.94510e-09 | 1.000000 | 7.94510e-09 | 1.000000 |
| rad12                         | 7.81652e-09 | 1.000000 | 7.81652e-09 | 1.000000 |
| Ph+MeAc                       | 5.79525e-09 | 1.000000 | 5.79525e-09 | 1.000000 |
| rad19anti                     | 5.44063e-09 | 1.000000 | 5.44063e-09 | 1.000000 |
| rad3                          | 5.29137e-09 | 1.000000 | 5.29137e-09 | 1.000000 |
| rad11                         | 3.87338e-09 | 1.000000 | 3.87338e-09 | 1.000000 |
| rad4                          | 2.68169e-09 | 1.000000 | 2.68169e-09 | 1.000000 |
| rad22                         | 2.08384e-09 | 1.000000 | 2.08384e-09 | 1.000000 |
| rad36                         | 4.86649e-10 | 1.000000 | 4.86649e-10 | 1.000000 |
| Ph+Allene                     | 4.67308e-10 | 1.000000 | 4.67308e-10 | 1.000000 |
| rad7                          | 4.31611e-10 | 1.000000 | 4.31611e-10 | 1.000000 |
| rad30                         | 1.85878e-10 | 1.000000 | 1.85878e-10 | 1.000000 |
| PhCH2CCH+H                    | 7.94978e-11 | 1.000000 | 7.94978e-11 | 1.000000 |
| rad5                          | 3.17947e-11 | 1.000000 | 3.17947e-11 | 1.000000 |
| Benzene+cycloprop-2-enylidene | 2.15484e-11 | 1.000000 | 2.15484e-11 | 1.000000 |
| rad28                         | 1.70294e-11 | 1.000000 | 1.70294e-11 | 1.000000 |
| rad18                         | 5.40632e-12 | 1.000000 | 5.40632e-12 | 1.000000 |
| rad37                         | 4.97324e-12 | 1.000000 | 4.97324e-12 | 1.000000 |
| rad13                         | 2.05345e-12 | 1.000000 | 2.05345e-12 | 1.000000 |
| rad14                         | 1.57574e-12 | 1.000000 | 1.57574e-12 | 1.000000 |
| rad27                         | 1.52558e-12 | 1.000000 | 1.52558e-12 | 1.000000 |
| PhcycC3H3_A+H                 | 9.80269e-13 | 1.000000 | 9.80269e-13 | 1.000000 |
| rad60syn                      | 7.30313e-13 | 1.000000 | 7.30313e-13 | 1.000000 |
| PAH9+H                        | 4.63363e-13 | 1.000000 | 4.63363e-13 | 1.000000 |
| rad60anti                     | 3.54144e-13 | 1.000000 | 3.54144e-13 | 1.000000 |
| rad20                         | 2.95705e-13 | 1.000000 | 2.95705e-13 | 1.000000 |
| PAH7+H                        | 2.89986e-13 | 1.000000 | 2.89986e-13 | 1.000000 |
| PAH3+H                        | 2.70681e-13 | 1.000000 | 2.70681e-13 | 1.000000 |
| rad38                         | 2.45670e-13 | 1.000000 | 2.45670e-13 | 1.000000 |
| rad21                         | 1.93213e-13 | 1.000000 | 1.93213e-13 | 1.000000 |
| rad25                         | 7.70853e-14 | 1.000000 | 7.70853e-14 | 1.000000 |
| rad59                         | 5.65359e-14 | 1.000000 | 5.65359e-14 | 1.000000 |
| rad46                         | 1.42082e-14 | 1.000000 | 1.42082e-14 | 1.000000 |
| PAH10+CH3                     | 3.98589e-15 | 1.000000 | 3.98589e-15 | 1.000000 |
| rad33                         | 2.52262e-15 | 1.000000 | 2.52262e-15 | 1.000000 |
| rad39                         | 2.51135e-15 | 1.000000 | 2.51135e-15 | 1.000000 |
| Phenyl+cycC3H4                | 1.32429e-15 | 1.000000 | 0.000000    | 1.000000 |
| rad43                         | 6.26661e-16 | 1.000000 | 6.26661e-16 | 1.000000 |
| rad24                         | 1.24608e-16 | 1.000000 | 1.24608e-16 | 1.000000 |
| rad62                         | 7.81758e-17 | 1.000000 | 7.81758e-17 | 1.000000 |
| rad50                         | 7.05401e-17 | 1.000000 | 7.05401e-17 | 1.000000 |
| rad70                         | 1.34023e-17 | 1.000000 | 1.34023e-17 | 1.000000 |
| rad31                         | 8.41989e-18 | 1.000000 | 8.41989e-18 | 1.000000 |
| rad54                         | 3.89697e-18 | 1.000000 | 3.89697e-18 | 1.000000 |
| rad58                         | 2.98142e-18 | 1.000000 | 2.98142e-18 | 1.000000 |
| PhcycC3H3_B+H                 | 1.95457e-18 | 1.000000 | 1.95457e-18 | 1.000000 |
| rad52                         | 3.97225e-19 | 1.000000 | 3.97225e-19 | 1.000000 |
| PAH1+H                        | 1.67938e-19 | 1.000000 | 1.67938e-19 | 1.000000 |
| rad34                         | 1.34384e-19 | 1.000000 | 1.34384e-19 | 1.000000 |
| rad51                         | 8.94219e-20 | 1.000000 | 8.94219e-20 | 1.000000 |
| rad55                         | 2.38806e-20 | 1.000000 | 2.38806e-20 | 1.000000 |
| Benzene+cycloprop-1-enylidene | 9.59328e-21 | 1.000000 | 9.59328e-21 | 1.000000 |
| rad41                         | 8.24411e-21 | 1.000000 | 8.24411e-21 | 1.000000 |
| rad42                         | 4.22788e-21 | 1.000000 | 4.22788e-21 | 1.000000 |
| rad65                         | 1.02680e-21 | 1.000000 | 1.02680e-21 | 1.000000 |
| rad47                         | 8.61467e-25 | 1.000000 | 8.61467e-25 | 1.000000 |
| rad53                         | 3.68195e-27 | 1.000000 | 3.68195e-27 | 1.000000 |
| rad64                         | 4.95436e-30 | 1.000000 | 4.95436e-30 | 1.000000 |
| rad61                         | 3.92010e-30 | 1.000000 | 3.92010e-30 | 1.000000 |
| rad68syn                      | 1.86830e-33 | 1.000000 | 1.86830e-33 | 1.000000 |
| rad68anti                     | 1.52604e-33 | 1.000000 | 1.52604e-33 | 1.000000 |
| rad56                         | 1.19630e-33 | 1.000000 | 1.19630e-33 | 1.000000 |
| rad19syn                      | 5.60285e-36 | 1.000000 | 5.60285e-36 | 1.000000 |
| rad40syn                      | 5.34835e-38 | 1.000000 | 5.34835e-38 | 1.000000 |

|           |             |         |             |         |
|-----------|-------------|---------|-------------|---------|
| rad40anti | 4.26075e-38 | 1.00000 | 4.26075e-38 | 1.00000 |
| rad73     | 1.88732e-39 | 1.00000 | 1.88732e-39 | 1.00000 |
| PAH8+H    | 7.48232e-41 | 1.00000 | 7.48232e-41 | 1.00000 |
| rad71     | 7.28035e-45 | 1.00000 | 7.28035e-45 | 1.00000 |
| rad8      | 2.53318e-48 | 1.00000 | 2.53318e-48 | 1.00000 |

1000.00000 Pa, 90.0000000 K

| Rate constant             | True (fraction)        | Effective (fraction)   |
|---------------------------|------------------------|------------------------|
| Total                     | 7.74016e-16 (1.00 )    | 7.74016e-16 (1.00 )    |
| Formation of rad19        | 7.74016e-16 (1.000 )   | 7.74016e-16 (1.000 )   |
| H-abstraction to cyc2enyl | 2.91736e-25 (3.77e-10) | 2.91736e-25 (3.77e-10) |
| H-abstraction to cyclenyl | 1.47814e-33 (1.91e-18) | 1.47814e-33 (1.91e-18) |

| species                       | PYtrue      | Cumul    | PYeffective | Cumul    |
|-------------------------------|-------------|----------|-------------|----------|
| rad9                          | 0.881647    | 0.881647 | 0.881647    | 0.881647 |
| Indene+H                      | 0.116836    | 0.998483 | 0.116836    | 0.998483 |
| rad15                         | 0.00150132  | 0.999984 | 0.00150132  | 0.999984 |
| PhCHCCH2+H                    | 1.42412e-05 | 0.999999 | 1.42412e-05 | 0.999999 |
| rad6                          | 6.54865e-07 | 0.999999 | 6.54865e-07 | 0.999999 |
| rad2                          | 4.46883e-07 | 1.000000 | 4.46883e-07 | 1.000000 |
| rad26                         | 8.31784e-08 | 1.000000 | 8.31784e-08 | 1.000000 |
| C2H2+PhCH2                    | 6.10243e-08 | 1.000000 | 6.10243e-08 | 1.000000 |
| rad23                         | 5.10234e-08 | 1.000000 | 5.10234e-08 | 1.000000 |
| rad10                         | 4.96916e-08 | 1.000000 | 4.96916e-08 | 1.000000 |
| rad1                          | 2.86799e-08 | 1.000000 | 2.86799e-08 | 1.000000 |
| rad67                         | 2.82829e-08 | 1.000000 | 2.82829e-08 | 1.000000 |
| PhCCH+CH3                     | 1.65185e-08 | 1.000000 | 1.65185e-08 | 1.000000 |
| rad35                         | 1.26670e-08 | 1.000000 | 1.26670e-08 | 1.000000 |
| PhCCCH3+H                     | 1.24090e-08 | 1.000000 | 1.24090e-08 | 1.000000 |
| rad45                         | 8.64457e-09 | 1.000000 | 8.64457e-09 | 1.000000 |
| Ph+MeAc                       | 7.91037e-09 | 1.000000 | 7.91037e-09 | 1.000000 |
| rad12                         | 7.44810e-09 | 1.000000 | 7.44810e-09 | 1.000000 |
| rad3                          | 6.09248e-09 | 1.000000 | 6.09248e-09 | 1.000000 |
| rad19anti                     | 5.03933e-09 | 1.000000 | 5.03933e-09 | 1.000000 |
| rad11                         | 3.24487e-09 | 1.000000 | 3.24487e-09 | 1.000000 |
| rad4                          | 3.08944e-09 | 1.000000 | 3.08944e-09 | 1.000000 |
| rad22                         | 1.76071e-09 | 1.000000 | 1.76071e-09 | 1.000000 |
| Ph+Allene                     | 5.72570e-10 | 1.000000 | 5.72570e-10 | 1.000000 |
| rad36                         | 5.29441e-10 | 1.000000 | 5.29441e-10 | 1.000000 |
| rad7                          | 4.92249e-10 | 1.000000 | 4.92249e-10 | 1.000000 |
| Benzene+cycloprop-2-enylidene | 3.76912e-10 | 1.000000 | 3.76912e-10 | 1.000000 |
| rad30                         | 2.19611e-10 | 1.000000 | 2.19611e-10 | 1.000000 |
| PhCH2CCH+H                    | 9.86319e-11 | 1.000000 | 9.86319e-11 | 1.000000 |
| rad5                          | 3.36075e-11 | 1.000000 | 3.36075e-11 | 1.000000 |
| rad28                         | 2.36741e-11 | 1.000000 | 2.36741e-11 | 1.000000 |
| rad37                         | 6.90379e-12 | 1.000000 | 6.90379e-12 | 1.000000 |
| rad18                         | 4.07110e-12 | 1.000000 | 4.07110e-12 | 1.000000 |
| rad13                         | 2.28855e-12 | 1.000000 | 2.28855e-12 | 1.000000 |
| rad14                         | 1.76250e-12 | 1.000000 | 1.76250e-12 | 1.000000 |
| rad27                         | 1.67663e-12 | 1.000000 | 1.67663e-12 | 1.000000 |
| PhcycC3H3_A+H                 | 1.19736e-12 | 1.000000 | 1.19736e-12 | 1.000000 |
| rad60syn                      | 8.76472e-13 | 1.000000 | 8.76472e-13 | 1.000000 |
| PAH9+H                        | 6.44020e-13 | 1.000000 | 6.44020e-13 | 1.000000 |
| rad60anti                     | 4.25611e-13 | 1.000000 | 4.25611e-13 | 1.000000 |
| PAH7+H                        | 3.64932e-13 | 1.000000 | 3.64932e-13 | 1.000000 |
| PAH3+H                        | 3.31138e-13 | 1.000000 | 3.31138e-13 | 1.000000 |
| rad38                         | 3.29210e-13 | 1.000000 | 3.29210e-13 | 1.000000 |
| rad20                         | 2.17132e-13 | 1.000000 | 2.17132e-13 | 1.000000 |
| rad21                         | 1.41450e-13 | 1.000000 | 1.41450e-13 | 1.000000 |
| rad59                         | 6.89716e-14 | 1.000000 | 6.89716e-14 | 1.000000 |
| rad25                         | 6.27488e-14 | 1.000000 | 6.27488e-14 | 1.000000 |
| rad46                         | 1.91632e-14 | 1.000000 | 1.91632e-14 | 1.000000 |
| PAH10+CH3                     | 5.86094e-15 | 1.000000 | 5.86094e-15 | 1.000000 |
| rad39                         | 4.19141e-15 | 1.000000 | 4.19141e-15 | 1.000000 |
| rad33                         | 2.79974e-15 | 1.000000 | 2.79974e-15 | 1.000000 |
| Phenyl+cycC3H4                | 2.14281e-15 | 1.000000 | 0.000000    | 1.000000 |
| rad43                         | 9.07939e-16 | 1.000000 | 9.07939e-16 | 1.000000 |
| rad24                         | 1.30615e-16 | 1.000000 | 1.30615e-16 | 1.000000 |
| rad62                         | 1.18855e-16 | 1.000000 | 1.18855e-16 | 1.000000 |
| rad50                         | 9.82645e-17 | 1.000000 | 9.82645e-17 | 1.000000 |
| rad70                         | 1.80461e-17 | 1.000000 | 1.80461e-17 | 1.000000 |
| PhcycC3H3_B+H                 | 1.02814e-17 | 1.000000 | 1.02814e-17 | 1.000000 |
| rad31                         | 9.87627e-18 | 1.000000 | 9.87627e-18 | 1.000000 |
| rad54                         | 5.92779e-18 | 1.000000 | 5.92779e-18 | 1.000000 |
| rad58                         | 3.92455e-18 | 1.000000 | 3.92455e-18 | 1.000000 |
| Benzene+cycloprop-1-enylidene | 1.90970e-18 | 1.000000 | 1.90970e-18 | 1.000000 |
| rad52                         | 5.66689e-19 | 1.000000 | 5.66689e-19 | 1.000000 |

|           |             |         |             |         |
|-----------|-------------|---------|-------------|---------|
| PAH1+H    | 2.72023e-19 | 1.00000 | 2.72023e-19 | 1.00000 |
| rad34     | 1.91686e-19 | 1.00000 | 1.91686e-19 | 1.00000 |
| rad51     | 1.31246e-19 | 1.00000 | 1.31246e-19 | 1.00000 |
| rad55     | 3.77909e-20 | 1.00000 | 3.77909e-20 | 1.00000 |
| rad41     | 1.43236e-20 | 1.00000 | 1.43236e-20 | 1.00000 |
| rad42     | 7.54134e-21 | 1.00000 | 7.54134e-21 | 1.00000 |
| rad65     | 1.61607e-21 | 1.00000 | 1.61607e-21 | 1.00000 |
| rad47     | 9.87687e-25 | 1.00000 | 9.87687e-25 | 1.00000 |
| rad53     | 1.25164e-26 | 1.00000 | 1.25164e-26 | 1.00000 |
| rad61     | 2.36425e-29 | 1.00000 | 2.36425e-29 | 1.00000 |
| rad64     | 2.18120e-29 | 1.00000 | 2.18120e-29 | 1.00000 |
| rad68syn  | 1.29752e-32 | 1.00000 | 1.29752e-32 | 1.00000 |
| rad68anti | 1.05827e-32 | 1.00000 | 1.05827e-32 | 1.00000 |
| rad56     | 8.08229e-33 | 1.00000 | 8.08229e-33 | 1.00000 |
| rad19syn  | 1.06154e-35 | 1.00000 | 1.06154e-35 | 1.00000 |
| rad40syn  | 5.03791e-37 | 1.00000 | 5.03791e-37 | 1.00000 |
| rad40anti | 4.01518e-37 | 1.00000 | 4.01518e-37 | 1.00000 |
| rad73     | 1.64704e-38 | 1.00000 | 1.64704e-38 | 1.00000 |
| PAH8+H    | 7.98667e-40 | 1.00000 | 7.98667e-40 | 1.00000 |
| rad71     | 8.16078e-44 | 1.00000 | 8.16078e-44 | 1.00000 |
| rad8      | 2.17277e-48 | 1.00000 | 2.17277e-48 | 1.00000 |

1000.00000 Pa, 100.000000 K

| Rate constant             | True (fraction)        | Effective (fraction)   |
|---------------------------|------------------------|------------------------|
| Total                     | 1.28255e-15 (1.00 )    | 1.28255e-15 (1.00 )    |
| Formation of rad19        | 1.28255e-15 (1.000 )   | 1.28255e-15 (1.000 )   |
| H-abstraction to cyc2enyl | 4.68359e-24 (3.65e-09) | 4.68359e-24 (3.65e-09) |
| H-abstraction to cyclenyl | 1.66242e-31 (1.30e-16) | 1.66242e-31 (1.30e-16) |

| species                       | PYtrue      | Cumul    | PYeffective | Cumul    |
|-------------------------------|-------------|----------|-------------|----------|
| rad9                          | 0.867922    | 0.867922 | 0.867922    | 0.867922 |
| Indene+H                      | 0.130608    | 0.998530 | 0.130608    | 0.998530 |
| rad15                         | 0.00145160  | 0.999982 | 0.00145160  | 0.999982 |
| PhCHCCH2+H                    | 1.64158e-05 | 0.999998 | 1.64158e-05 | 0.999998 |
| rad6                          | 7.59063e-07 | 0.999999 | 7.59063e-07 | 0.999999 |
| rad2                          | 5.06606e-07 | 0.999999 | 5.06606e-07 | 0.999999 |
| rad26                         | 9.58796e-08 | 0.999999 | 9.58796e-08 | 0.999999 |
| C2H2+PhCH2                    | 7.12500e-08 | 0.999999 | 7.12500e-08 | 0.999999 |
| rad10                         | 5.74333e-08 | 1.000000 | 5.74333e-08 | 1.000000 |
| rad23                         | 5.70106e-08 | 1.000000 | 5.70106e-08 | 1.000000 |
| rad67                         | 3.30156e-08 | 1.000000 | 3.30156e-08 | 1.000000 |
| rad1                          | 3.26091e-08 | 1.000000 | 3.26091e-08 | 1.000000 |
| PhCCH+CH3                     | 2.21589e-08 | 1.000000 | 2.21589e-08 | 1.000000 |
| PhCCH3+H                      | 1.63631e-08 | 1.000000 | 1.63631e-08 | 1.000000 |
| rad35                         | 1.47611e-08 | 1.000000 | 1.47611e-08 | 1.000000 |
| Ph+MeAc                       | 1.05395e-08 | 1.000000 | 1.05395e-08 | 1.000000 |
| rad45                         | 9.32438e-09 | 1.000000 | 9.32438e-09 | 1.000000 |
| rad12                         | 7.14126e-09 | 1.000000 | 7.14126e-09 | 1.000000 |
| rad3                          | 6.91102e-09 | 1.000000 | 6.91102e-09 | 1.000000 |
| rad19anti                     | 4.71276e-09 | 1.000000 | 4.71276e-09 | 1.000000 |
| Benzene+cycloprop-2-enylidene | 3.65179e-09 | 1.000000 | 3.65179e-09 | 1.000000 |
| rad4                          | 3.50689e-09 | 1.000000 | 3.50689e-09 | 1.000000 |
| rad11                         | 2.78719e-09 | 1.000000 | 2.78719e-09 | 1.000000 |
| rad22                         | 1.51931e-09 | 1.000000 | 1.51931e-09 | 1.000000 |
| Ph+Allene                     | 6.91681e-10 | 1.000000 | 6.91681e-10 | 1.000000 |
| rad36                         | 5.71122e-10 | 1.000000 | 5.71122e-10 | 1.000000 |
| rad7                          | 5.55919e-10 | 1.000000 | 5.55919e-10 | 1.000000 |
| rad30                         | 2.56196e-10 | 1.000000 | 2.56196e-10 | 1.000000 |
| PhCH2CCH+H                    | 1.20669e-10 | 1.000000 | 1.20669e-10 | 1.000000 |
| rad5                          | 3.50757e-11 | 1.000000 | 3.50757e-11 | 1.000000 |
| rad28                         | 3.19856e-11 | 1.000000 | 3.19856e-11 | 1.000000 |
| rad37                         | 9.36148e-12 | 1.000000 | 9.36148e-12 | 1.000000 |
| rad18                         | 3.16644e-12 | 1.000000 | 3.16644e-12 | 1.000000 |
| rad13                         | 2.53610e-12 | 1.000000 | 2.53610e-12 | 1.000000 |
| rad14                         | 1.94949e-12 | 1.000000 | 1.94949e-12 | 1.000000 |
| rad27                         | 1.83050e-12 | 1.000000 | 1.83050e-12 | 1.000000 |
| PhcycC3H3_A+H                 | 1.47241e-12 | 1.000000 | 1.47241e-12 | 1.000000 |
| rad60syn                      | 1.03937e-12 | 1.000000 | 1.03937e-12 | 1.000000 |
| PAH9+H                        | 8.67640e-13 | 1.000000 | 8.67640e-13 | 1.000000 |
| rad60anti                     | 5.05448e-13 | 1.000000 | 5.05448e-13 | 1.000000 |
| PAH7+H                        | 4.53678e-13 | 1.000000 | 4.53678e-13 | 1.000000 |
| rad38                         | 4.31009e-13 | 1.000000 | 4.31009e-13 | 1.000000 |
| PAH3+H                        | 4.00685e-13 | 1.000000 | 4.00685e-13 | 1.000000 |
| rad20                         | 1.65976e-13 | 1.000000 | 1.65976e-13 | 1.000000 |
| rad21                         | 1.07858e-13 | 1.000000 | 1.07858e-13 | 1.000000 |
| rad59                         | 8.32117e-14 | 1.000000 | 8.32117e-14 | 1.000000 |
| rad25                         | 5.25432e-14 | 1.000000 | 5.25432e-14 | 1.000000 |

|                               |             |          |             |          |
|-------------------------------|-------------|----------|-------------|----------|
| rad46                         | 2.52533e-14 | 1.000000 | 2.52533e-14 | 1.000000 |
| PAH10+CH3                     | 8.45665e-15 | 1.000000 | 8.45665e-15 | 1.000000 |
| rad39                         | 6.72562e-15 | 1.000000 | 6.72562e-15 | 1.000000 |
| Phenyl+cycC3H4                | 3.36902e-15 | 1.000000 | 0.000000    | 1.000000 |
| rad33                         | 3.09248e-15 | 1.000000 | 3.09248e-15 | 1.000000 |
| rad43                         | 1.28897e-15 | 1.000000 | 1.28897e-15 | 1.000000 |
| rad62                         | 1.75617e-16 | 1.000000 | 1.75617e-16 | 1.000000 |
| rad24                         | 1.36609e-16 | 1.000000 | 1.36609e-16 | 1.000000 |
| rad50                         | 1.33970e-16 | 1.000000 | 1.33970e-16 | 1.000000 |
| Benzene+cycloprop-1-enylidene | 1.29619e-16 | 1.000000 | 1.29619e-16 | 1.000000 |
| PhcycC3H3_B+H                 | 4.03211e-17 | 1.000000 | 4.03211e-17 | 1.000000 |
| rad70                         | 2.40094e-17 | 1.000000 | 2.40094e-17 | 1.000000 |
| rad31                         | 1.14599e-17 | 1.000000 | 1.14599e-17 | 1.000000 |
| rad54                         | 8.80138e-18 | 1.000000 | 8.80138e-18 | 1.000000 |
| rad58                         | 5.13087e-18 | 1.000000 | 5.13087e-18 | 1.000000 |
| rad52                         | 7.92370e-19 | 1.000000 | 7.92370e-19 | 1.000000 |
| PAH1+H                        | 4.35215e-19 | 1.000000 | 4.35215e-19 | 1.000000 |
| rad34                         | 2.70710e-19 | 1.000000 | 2.70710e-19 | 1.000000 |
| rad51                         | 1.89147e-19 | 1.000000 | 1.89147e-19 | 1.000000 |
| rad55                         | 5.85106e-20 | 1.000000 | 5.85106e-20 | 1.000000 |
| rad41                         | 2.45441e-20 | 1.000000 | 2.45441e-20 | 1.000000 |
| rad42                         | 1.31311e-20 | 1.000000 | 1.31311e-20 | 1.000000 |
| rad65                         | 2.47836e-21 | 1.000000 | 2.47836e-21 | 1.000000 |
| rad47                         | 1.12652e-24 | 1.000000 | 1.12652e-24 | 1.000000 |
| rad53                         | 4.12172e-26 | 1.000000 | 4.12172e-26 | 1.000000 |
| rad61                         | 1.71834e-28 | 1.000000 | 1.71834e-28 | 1.000000 |
| rad64                         | 9.72612e-29 | 1.000000 | 9.72612e-29 | 1.000000 |
| rad68syn                      | 1.28194e-31 | 1.000000 | 1.28194e-31 | 1.000000 |
| rad68anti                     | 1.04282e-31 | 1.000000 | 1.04282e-31 | 1.000000 |
| rad56                         | 7.03034e-32 | 1.000000 | 7.03034e-32 | 1.000000 |
| rad19syn                      | 2.10002e-35 | 1.000000 | 2.10002e-35 | 1.000000 |
| rad40syn                      | 6.99566e-36 | 1.000000 | 6.99566e-36 | 1.000000 |
| rad40anti                     | 5.57757e-36 | 1.000000 | 5.57757e-36 | 1.000000 |
| rad73                         | 2.12291e-37 | 1.000000 | 2.12291e-37 | 1.000000 |
| PAH8+H                        | 1.31284e-38 | 1.000000 | 1.31284e-38 | 1.000000 |
| rad71                         | 1.44600e-42 | 1.000000 | 1.44600e-42 | 1.000000 |
| rad8                          | 2.04736e-48 | 1.000000 | 2.04736e-48 | 1.000000 |

1000.00000 Pa, 110.000000 K

| Rate constant             | True (fraction)        | Effective (fraction)   |
|---------------------------|------------------------|------------------------|
| Total                     | 1.95524e-15 (1.00 )    | 1.95524e-15 (1.00 )    |
| Formation of rad19        | 1.95524e-15 (1.000 )   | 1.95524e-15 (1.000 )   |
| H-abstraction to cyc2enyl | 4.50936e-23 (2.31e-08) | 4.50936e-23 (2.31e-08) |
| H-abstraction to cyclenyl | 7.87782e-30 (4.03e-15) | 7.87782e-30 (4.03e-15) |

| species                       | PYtrue      | Cumul    | PYeffective | Cumul    |
|-------------------------------|-------------|----------|-------------|----------|
| rad9                          | 0.854155    | 0.854155 | 0.854155    | 0.854155 |
| Indene+H                      | 0.144418    | 0.998573 | 0.144418    | 0.998573 |
| rad15                         | 0.00140613  | 0.999979 | 0.00140613  | 0.999979 |
| PhCHCCH2+H                    | 1.87461e-05 | 0.999998 | 1.87461e-05 | 0.999998 |
| rad6                          | 8.71444e-07 | 0.999999 | 8.71444e-07 | 0.999999 |
| rad2                          | 5.68645e-07 | 0.999999 | 5.68645e-07 | 0.999999 |
| rad26                         | 1.09483e-07 | 0.999999 | 1.09483e-07 | 0.999999 |
| C2H2+PhCH2                    | 8.24082e-08 | 0.999999 | 8.24082e-08 | 0.999999 |
| rad10                         | 6.53700e-08 | 1.000000 | 6.53700e-08 | 1.000000 |
| rad23                         | 6.29588e-08 | 1.000000 | 6.29588e-08 | 1.000000 |
| rad67                         | 3.81946e-08 | 1.000000 | 3.81946e-08 | 1.000000 |
| rad1                          | 3.67239e-08 | 1.000000 | 3.67239e-08 | 1.000000 |
| PhCCH+CH3                     | 2.90682e-08 | 1.000000 | 2.90682e-08 | 1.000000 |
| Benzene+cycloprop-2-enylidene | 2.30629e-08 | 1.000000 | 2.30629e-08 | 1.000000 |
| PhCCCH3+H                     | 2.11892e-08 | 1.000000 | 2.11892e-08 | 1.000000 |
| rad35                         | 1.70457e-08 | 1.000000 | 1.70457e-08 | 1.000000 |
| Ph+MeAc                       | 1.37967e-08 | 1.000000 | 1.37967e-08 | 1.000000 |
| rad45                         | 9.99025e-09 | 1.000000 | 9.99025e-09 | 1.000000 |
| rad3                          | 7.75257e-09 | 1.000000 | 7.75257e-09 | 1.000000 |
| rad12                         | 6.87892e-09 | 1.000000 | 6.87892e-09 | 1.000000 |
| rad19anti                     | 4.44032e-09 | 1.000000 | 4.44032e-09 | 1.000000 |
| rad4                          | 3.93704e-09 | 1.000000 | 3.93704e-09 | 1.000000 |
| rad11                         | 2.44649e-09 | 1.000000 | 2.44649e-09 | 1.000000 |
| rad22                         | 1.33476e-09 | 1.000000 | 1.33476e-09 | 1.000000 |
| Ph+Allene                     | 8.27493e-10 | 1.000000 | 8.27493e-10 | 1.000000 |
| rad7                          | 6.23546e-10 | 1.000000 | 6.23546e-10 | 1.000000 |
| rad36                         | 6.12070e-10 | 1.000000 | 6.12070e-10 | 1.000000 |
| rad30                         | 2.96146e-10 | 1.000000 | 2.96146e-10 | 1.000000 |
| PhCH2CCH+H                    | 1.46247e-10 | 1.000000 | 1.46247e-10 | 1.000000 |
| rad28                         | 4.23274e-11 | 1.000000 | 4.23274e-11 | 1.000000 |
| rad5                          | 3.62410e-11 | 1.000000 | 3.62410e-11 | 1.000000 |



|                               |             |          |             |          |
|-------------------------------|-------------|----------|-------------|----------|
| rad37                         | 1.24843e-11 | 1.000000 | 1.24843e-11 | 1.000000 |
| rad13                         | 2.79964e-12 | 1.000000 | 2.79964e-12 | 1.000000 |
| rad18                         | 2.52774e-12 | 1.000000 | 2.52774e-12 | 1.000000 |
| rad14                         | 2.13878e-12 | 1.000000 | 2.13878e-12 | 1.000000 |
| rad27                         | 1.98832e-12 | 1.000000 | 1.98832e-12 | 1.000000 |
| PhcycC3H3_A+H                 | 1.82282e-12 | 1.000000 | 1.82282e-12 | 1.000000 |
| rad60syn                      | 1.22228e-12 | 1.000000 | 1.22228e-12 | 1.000000 |
| PAH9+H                        | 1.14267e-12 | 1.000000 | 1.14267e-12 | 1.000000 |
| rad60anti                     | 5.95311e-13 | 1.000000 | 5.95311e-13 | 1.000000 |
| PAH7+H                        | 5.60003e-13 | 1.000000 | 5.60003e-13 | 1.000000 |
| rad38                         | 5.54914e-13 | 1.000000 | 5.54914e-13 | 1.000000 |
| PAH3+H                        | 4.81357e-13 | 1.000000 | 4.81357e-13 | 1.000000 |
| rad20                         | 1.31177e-13 | 1.000000 | 1.31177e-13 | 1.000000 |
| rad59                         | 9.96512e-14 | 1.000000 | 9.96512e-14 | 1.000000 |
| rad21                         | 8.50691e-14 | 1.000000 | 8.50691e-14 | 1.000000 |
| rad25                         | 4.50596e-14 | 1.000000 | 4.50596e-14 | 1.000000 |
| rad46                         | 3.27300e-14 | 1.000000 | 3.27300e-14 | 1.000000 |
| PAH10+CH3                     | 1.20600e-14 | 1.000000 | 1.20600e-14 | 1.000000 |
| rad39                         | 1.04993e-14 | 1.000000 | 1.04993e-14 | 1.000000 |
| Phenyl+cycC3H4                | 5.18625e-15 | 1.000000 | 0.00000     | 1.000000 |
| Benzene+cycloprop-1-enylidene | 4.02908e-15 | 1.000000 | 4.02908e-15 | 1.000000 |
| rad33                         | 3.40505e-15 | 1.000000 | 3.40505e-15 | 1.000000 |
| rad43                         | 1.80547e-15 | 1.000000 | 1.80547e-15 | 1.000000 |
| rad62                         | 2.54479e-16 | 1.000000 | 2.54479e-16 | 1.000000 |
| rad50                         | 1.80004e-16 | 1.000000 | 1.80004e-16 | 1.000000 |
| rad24                         | 1.42630e-16 | 1.000000 | 1.42630e-16 | 1.000000 |
| PhcycC3H3_B+H                 | 1.28348e-16 | 1.000000 | 1.28348e-16 | 1.000000 |
| rad70                         | 3.17378e-17 | 1.000000 | 3.17378e-17 | 1.000000 |
| rad31                         | 1.31952e-17 | 1.000000 | 1.31952e-17 | 1.000000 |
| rad54                         | 1.28695e-17 | 1.000000 | 1.28695e-17 | 1.000000 |
| rad58                         | 6.68991e-18 | 1.000000 | 6.68991e-18 | 1.000000 |
| rad52                         | 1.09372e-18 | 1.000000 | 1.09372e-18 | 1.000000 |
| PAH1+H                        | 6.92933e-19 | 1.000000 | 6.92933e-19 | 1.000000 |
| rad34                         | 3.80718e-19 | 1.000000 | 3.80718e-19 | 1.000000 |
| rad51                         | 2.69660e-19 | 1.000000 | 2.69660e-19 | 1.000000 |
| rad55                         | 8.94494e-20 | 1.000000 | 8.94494e-20 | 1.000000 |
| rad41                         | 4.17635e-20 | 1.000000 | 4.17635e-20 | 1.000000 |
| rad42                         | 2.25236e-20 | 1.000000 | 2.25236e-20 | 1.000000 |
| rad65                         | 3.73960e-21 | 1.000000 | 3.73960e-21 | 1.000000 |
| rad47                         | 1.28095e-24 | 1.000000 | 1.28095e-24 | 1.000000 |
| rad53                         | 1.29106e-25 | 1.000000 | 1.29106e-25 | 1.000000 |
| rad61                         | 1.32148e-27 | 1.000000 | 1.32148e-27 | 1.000000 |
| rad64                         | 4.24672e-28 | 1.000000 | 4.24672e-28 | 1.000000 |
| rad68syn                      | 1.52042e-30 | 1.000000 | 1.52042e-30 | 1.000000 |
| rad68anti                     | 1.23156e-30 | 1.000000 | 1.23156e-30 | 1.000000 |
| rad56                         | 6.93437e-31 | 1.000000 | 6.93437e-31 | 1.000000 |
| rad40syn                      | 1.42104e-34 | 1.000000 | 1.42104e-34 | 1.000000 |
| rad40anti                     | 1.13457e-34 | 1.000000 | 1.13457e-34 | 1.000000 |
| rad19syn                      | 4.33593e-35 | 1.000000 | 4.33593e-35 | 1.000000 |
| rad73                         | 3.82430e-36 | 1.000000 | 3.82430e-36 | 1.000000 |
| PAH8+H                        | 3.52958e-37 | 1.000000 | 3.52958e-37 | 1.000000 |
| rad71                         | 4.35801e-41 | 1.000000 | 4.35801e-41 | 1.000000 |
| rad8                          | 2.07584e-48 | 1.000000 | 2.07584e-48 | 1.000000 |

1000.00000 Pa, 120.000000 K

| Rate constant             | True (fraction)        | Effective (fraction)   |
|---------------------------|------------------------|------------------------|
| Total                     | 2.79817e-15 (1.00 )    | 2.79817e-15 (1.00 )    |
| Formation of rad19        | 2.79817e-15 (1.000 )   | 2.79817e-15 (1.000 )   |
| H-abstraction to cyc2enyl | 2.96039e-22 (1.06e-07) | 2.96039e-22 (1.06e-07) |
| H-abstraction to cyclenyl | 1.95323e-28 (6.98e-14) | 1.95323e-28 (6.98e-14) |

| species                       | PYtrue      | Cumul    | PYeffective | Cumul    |
|-------------------------------|-------------|----------|-------------|----------|
| rad9                          | 0.840294    | 0.840294 | 0.840294    | 0.840294 |
| Indene+H                      | 0.158319    | 0.998613 | 0.158319    | 0.998613 |
| rad15                         | 0.00136392  | 0.999977 | 0.00136392  | 0.999977 |
| PhCHCCH2+H                    | 2.12587e-05 | 0.999998 | 2.12587e-05 | 0.999998 |
| rad6                          | 9.93427e-07 | 0.999999 | 9.93427e-07 | 0.999999 |
| rad2                          | 6.33274e-07 | 1.000000 | 6.33274e-07 | 1.000000 |
| rad26                         | 1.24133e-07 | 1.000000 | 1.24133e-07 | 1.000000 |
| Benzene+cycloprop-2-enylidene | 1.05797e-07 | 1.000000 | 1.05797e-07 | 1.000000 |
| C2H2+PhCH2                    | 9.46669e-08 | 1.000000 | 9.46669e-08 | 1.000000 |
| rad10                         | 7.35335e-08 | 1.000000 | 7.35335e-08 | 1.000000 |
| rad23                         | 6.88981e-08 | 1.000000 | 6.88981e-08 | 1.000000 |
| rad67                         | 4.38993e-08 | 1.000000 | 4.38993e-08 | 1.000000 |
| rad1                          | 4.10486e-08 | 1.000000 | 4.10486e-08 | 1.000000 |
| PhCCH+CH3                     | 3.74983e-08 | 1.000000 | 3.74983e-08 | 1.000000 |
| PhCCCH3+H                     | 2.70702e-08 | 1.000000 | 2.70702e-08 | 1.000000 |

|                               |             |         |             |         |
|-------------------------------|-------------|---------|-------------|---------|
| rad35                         | 1.95544e-08 | 1.00000 | 1.95544e-08 | 1.00000 |
| Ph+MeAc                       | 1.78284e-08 | 1.00000 | 1.78284e-08 | 1.00000 |
| rad45                         | 1.06470e-08 | 1.00000 | 1.06470e-08 | 1.00000 |
| rad3                          | 8.62199e-09 | 1.00000 | 8.62199e-09 | 1.00000 |
| rad12                         | 6.64980e-09 | 1.00000 | 6.64980e-09 | 1.00000 |
| rad4                          | 4.38252e-09 | 1.00000 | 4.38252e-09 | 1.00000 |
| rad19anti                     | 4.20859e-09 | 1.00000 | 4.20859e-09 | 1.00000 |
| rad11                         | 2.18901e-09 | 1.00000 | 2.18901e-09 | 1.00000 |
| rad22                         | 1.19094e-09 | 1.00000 | 1.19094e-09 | 1.00000 |
| Ph+Allene                     | 9.83574e-10 | 1.00000 | 9.83574e-10 | 1.00000 |
| rad7                          | 6.96078e-10 | 1.00000 | 6.96078e-10 | 1.00000 |
| rad36                         | 6.52612e-10 | 1.00000 | 6.52612e-10 | 1.00000 |
| rad30                         | 3.40064e-10 | 1.00000 | 3.40064e-10 | 1.00000 |
| PhCH2CCH+H                    | 1.76182e-10 | 1.00000 | 1.76182e-10 | 1.00000 |
| rad28                         | 5.51706e-11 | 1.00000 | 5.51706e-11 | 1.00000 |
| rad5                          | 3.71365e-11 | 1.00000 | 3.71365e-11 | 1.00000 |
| rad37                         | 1.64565e-11 | 1.00000 | 1.64565e-11 | 1.00000 |
| rad13                         | 3.08283e-12 | 1.00000 | 3.08283e-12 | 1.00000 |
| rad14                         | 2.33197e-12 | 1.00000 | 2.33197e-12 | 1.00000 |
| PhcycC3H3_A+H                 | 2.27226e-12 | 1.00000 | 2.27226e-12 | 1.00000 |
| rad27                         | 2.15101e-12 | 1.00000 | 2.15101e-12 | 1.00000 |
| rad18                         | 2.06169e-12 | 1.00000 | 2.06169e-12 | 1.00000 |
| PAH9+H                        | 1.48002e-12 | 1.00000 | 1.48002e-12 | 1.00000 |
| rad60syn                      | 1.42923e-12 | 1.00000 | 1.42923e-12 | 1.00000 |
| rad38                         | 7.05943e-13 | 1.00000 | 7.05943e-13 | 1.00000 |
| rad60anti                     | 6.97233e-13 | 1.00000 | 6.97233e-13 | 1.00000 |
| PAH7+H                        | 6.89031e-13 | 1.00000 | 6.89031e-13 | 1.00000 |
| PAH3+H                        | 5.75736e-13 | 1.00000 | 5.75736e-13 | 1.00000 |
| rad59                         | 1.18789e-13 | 1.00000 | 1.18789e-13 | 1.00000 |
| rad20                         | 1.06663e-13 | 1.00000 | 1.06663e-13 | 1.00000 |
| Benzene+cycloprop-1-enylidene | 6.98038e-14 | 1.00000 | 6.98038e-14 | 1.00000 |
| rad21                         | 6.90530e-14 | 1.00000 | 6.90530e-14 | 1.00000 |
| rad46                         | 4.19219e-14 | 1.00000 | 4.19219e-14 | 1.00000 |
| rad25                         | 3.94470e-14 | 1.00000 | 3.94470e-14 | 1.00000 |
| PAH10+CH3                     | 1.70928e-14 | 1.00000 | 1.70928e-14 | 1.00000 |
| rad39                         | 1.60857e-14 | 1.00000 | 1.60857e-14 | 1.00000 |
| Phenyl+cycC3H4                | 7.86462e-15 | 1.00000 | 0.00000     | 1.00000 |
| rad33                         | 3.74188e-15 | 1.00000 | 3.74188e-15 | 1.00000 |
| rad43                         | 2.50798e-15 | 1.00000 | 2.50798e-15 | 1.00000 |
| rad62                         | 3.64009e-16 | 1.00000 | 3.64009e-16 | 1.00000 |
| PhcycC3H3_B+H                 | 3.50941e-16 | 1.00000 | 3.50941e-16 | 1.00000 |
| rad50                         | 2.39587e-16 | 1.00000 | 2.39587e-16 | 1.00000 |
| rad24                         | 1.48717e-16 | 1.00000 | 1.48717e-16 | 1.00000 |
| rad70                         | 4.18590e-17 | 1.00000 | 4.18590e-17 | 1.00000 |
| rad54                         | 1.86569e-17 | 1.00000 | 1.86569e-17 | 1.00000 |
| rad31                         | 1.51104e-17 | 1.00000 | 1.51104e-17 | 1.00000 |
| rad58                         | 8.72738e-18 | 1.00000 | 8.72738e-18 | 1.00000 |
| rad52                         | 1.49839e-18 | 1.00000 | 1.49839e-18 | 1.00000 |
| PAH1+H                        | 1.10427e-18 | 1.00000 | 1.10427e-18 | 1.00000 |
| rad34                         | 5.35546e-19 | 1.00000 | 5.35546e-19 | 1.00000 |
| rad51                         | 3.82475e-19 | 1.00000 | 3.82475e-19 | 1.00000 |
| rad55                         | 1.35974e-19 | 1.00000 | 1.35974e-19 | 1.00000 |
| rad41                         | 7.09188e-20 | 1.00000 | 7.09188e-20 | 1.00000 |
| rad42                         | 3.83053e-20 | 1.00000 | 3.83053e-20 | 1.00000 |
| rad65                         | 5.59244e-21 | 1.00000 | 5.59244e-21 | 1.00000 |
| rad47                         | 1.45445e-24 | 1.00000 | 1.45445e-24 | 1.00000 |
| rad53                         | 3.83492e-25 | 1.00000 | 3.83492e-25 | 1.00000 |
| rad61                         | 9.43316e-27 | 1.00000 | 9.43316e-27 | 1.00000 |
| rad64                         | 1.77512e-27 | 1.00000 | 1.77512e-27 | 1.00000 |
| rad68syn                      | 1.66615e-29 | 1.00000 | 1.66615e-29 | 1.00000 |
| rad68anti                     | 1.34296e-29 | 1.00000 | 1.34296e-29 | 1.00000 |
| rad56                         | 6.50020e-30 | 1.00000 | 6.50020e-30 | 1.00000 |
| rad40syn                      | 3.21304e-33 | 1.00000 | 3.21304e-33 | 1.00000 |
| rad40anti                     | 2.57751e-33 | 1.00000 | 2.57751e-33 | 1.00000 |
| rad19syn                      | 9.35424e-35 | 1.00000 | 9.35424e-35 | 1.00000 |
| rad73                         | 7.31558e-35 | 1.00000 | 7.31558e-35 | 1.00000 |
| PAH8+H                        | 1.34635e-35 | 1.00000 | 1.34635e-35 | 1.00000 |
| rad71                         | 1.99400e-39 | 1.00000 | 1.99400e-39 | 1.00000 |
| rad8                          | 2.23310e-48 | 1.00000 | 2.23310e-48 | 1.00000 |

1000.00000 Pa, 130.000000 K

=====

| Rate constant             | True (fraction)        | Effective (fraction)   |
|---------------------------|------------------------|------------------------|
| Total                     | 3.81236e-15 (1.00 )    | 3.81236e-15 (1.00 )    |
| Formation of rad19        | 3.81236e-15 (1.000 )   | 3.81236e-15 (1.000 )   |
| H-abstraction to cyc2enyl | 1.44825e-21 (3.80e-07) | 1.44825e-21 (3.80e-07) |
| H-abstraction to cyclenyl | 2.94348e-27 (7.72e-13) | 2.94348e-27 (7.72e-13) |

| species | PYtrue | Cumul | PYeffective | Cumul |
|---------|--------|-------|-------------|-------|
|---------|--------|-------|-------------|-------|

|                               |             |          |             |          |
|-------------------------------|-------------|----------|-------------|----------|
| rad9                          | 0.826288    | 0.826288 | 0.826288    | 0.826288 |
| Indene+H                      | 0.172361    | 0.998649 | 0.172361    | 0.998649 |
| rad15                         | 0.00132423  | 0.999973 | 0.00132423  | 0.999973 |
| PhCHCCH2+H                    | 2.39843e-05 | 0.999997 | 2.39843e-05 | 0.999997 |
| rad6                          | 1.12666e-06 | 0.999998 | 1.12666e-06 | 0.999998 |
| rad2                          | 7.00750e-07 | 0.999999 | 7.00750e-07 | 0.999999 |
| Benzene+cycloprop-2-enylidene | 3.79882e-07 | 0.999999 | 3.79882e-07 | 0.999999 |
| rad26                         | 1.39994e-07 | 0.999999 | 1.39994e-07 | 0.999999 |
| C2H2+PhCH2                    | 1.08226e-07 | 0.999999 | 1.08226e-07 | 0.999999 |
| rad10                         | 8.19568e-08 | 0.999999 | 8.19568e-08 | 0.999999 |
| rad23                         | 7.48546e-08 | 0.999999 | 7.48546e-08 | 0.999999 |
| rad67                         | 5.02249e-08 | 0.999999 | 5.02249e-08 | 0.999999 |
| PhCCH+CH3                     | 4.77651e-08 | 1.000000 | 4.77651e-08 | 1.000000 |
| rad1                          | 4.56073e-08 | 1.000000 | 4.56073e-08 | 1.000000 |
| PhCCCH3+H                     | 3.42381e-08 | 1.000000 | 3.42381e-08 | 1.000000 |
| Ph+MeAc                       | 2.28230e-08 | 1.000000 | 2.28230e-08 | 1.000000 |
| rad35                         | 2.23273e-08 | 1.000000 | 2.23273e-08 | 1.000000 |
| rad45                         | 1.12988e-08 | 1.000000 | 1.12988e-08 | 1.000000 |
| rad3                          | 9.52351e-09 | 1.000000 | 9.52351e-09 | 1.000000 |
| rad12                         | 6.44611e-09 | 1.000000 | 6.44611e-09 | 1.000000 |
| rad4                          | 4.84568e-09 | 1.000000 | 4.84568e-09 | 1.000000 |
| rad19anti                     | 4.00839e-09 | 1.000000 | 4.00839e-09 | 1.000000 |
| rad11                         | 1.99289e-09 | 1.000000 | 1.99289e-09 | 1.000000 |
| Ph+Allene                     | 1.16442e-09 | 1.000000 | 1.16442e-09 | 1.000000 |
| rad22                         | 1.07708e-09 | 1.000000 | 1.07708e-09 | 1.000000 |
| rad7                          | 7.74546e-10 | 1.000000 | 7.74546e-10 | 1.000000 |
| rad36                         | 6.93035e-10 | 1.000000 | 6.93035e-10 | 1.000000 |
| rad30                         | 3.88672e-10 | 1.000000 | 3.88672e-10 | 1.000000 |
| PhCH2CCH+H                    | 2.11518e-10 | 1.000000 | 2.11518e-10 | 1.000000 |
| rad28                         | 7.11286e-11 | 1.000000 | 7.11286e-11 | 1.000000 |
| rad5                          | 3.77888e-11 | 1.000000 | 3.77888e-11 | 1.000000 |
| rad37                         | 2.15259e-11 | 1.000000 | 2.15259e-11 | 1.000000 |
| rad13                         | 3.38970e-12 | 1.000000 | 3.38970e-12 | 1.000000 |
| PhcycC3H3_A+H                 | 2.85300e-12 | 1.000000 | 2.85300e-12 | 1.000000 |
| rad14                         | 2.53037e-12 | 1.000000 | 2.53037e-12 | 1.000000 |
| rad27                         | 2.31937e-12 | 1.000000 | 2.31937e-12 | 1.000000 |
| PAH9+H                        | 1.89383e-12 | 1.000000 | 1.89383e-12 | 1.000000 |
| rad18                         | 1.71237e-12 | 1.000000 | 1.71237e-12 | 1.000000 |
| rad60syn                      | 1.66517e-12 | 1.000000 | 1.66517e-12 | 1.000000 |
| rad38                         | 8.90671e-13 | 1.000000 | 8.90671e-13 | 1.000000 |
| PAH7+H                        | 8.47821e-13 | 1.000000 | 8.47821e-13 | 1.000000 |
| rad60anti                     | 8.13733e-13 | 1.000000 | 8.13733e-13 | 1.000000 |
| Benzene+cycloprop-1-enylidene | 7.72089e-13 | 1.000000 | 7.72089e-13 | 1.000000 |
| PAH3+H                        | 6.87127e-13 | 1.000000 | 6.87127e-13 | 1.000000 |
| rad59                         | 1.41260e-13 | 1.000000 | 1.41260e-13 | 1.000000 |
| rad20                         | 8.89079e-14 | 1.000000 | 8.89079e-14 | 1.000000 |
| rad21                         | 5.74752e-14 | 1.000000 | 5.74752e-14 | 1.000000 |
| rad46                         | 5.32599e-14 | 1.000000 | 5.32599e-14 | 1.000000 |
| rad25                         | 3.51697e-14 | 1.000000 | 3.51697e-14 | 1.000000 |
| rad39                         | 2.43511e-14 | 1.000000 | 2.43511e-14 | 1.000000 |
| PAH10+CH3                     | 2.41842e-14 | 1.000000 | 2.41842e-14 | 1.000000 |
| Phenyl+cycC3H4                | 1.18041e-14 | 1.000000 | 0.000000    | 1.000000 |
| rad33                         | 4.10784e-15 | 1.000000 | 4.10784e-15 | 1.000000 |
| rad43                         | 3.46863e-15 | 1.000000 | 3.46863e-15 | 1.000000 |
| PhcycC3H3_B+H                 | 8.56797e-16 | 1.000000 | 8.56797e-16 | 1.000000 |
| rad62                         | 5.16492e-16 | 1.000000 | 5.16492e-16 | 1.000000 |
| rad50                         | 3.17181e-16 | 1.000000 | 3.17181e-16 | 1.000000 |
| rad24                         | 1.54907e-16 | 1.000000 | 1.54907e-16 | 1.000000 |
| rad70                         | 5.52655e-17 | 1.000000 | 5.52655e-17 | 1.000000 |
| rad54                         | 2.69582e-17 | 1.000000 | 2.69582e-17 | 1.000000 |
| rad31                         | 1.72381e-17 | 1.000000 | 1.72381e-17 | 1.000000 |
| rad58                         | 1.14216e-17 | 1.000000 | 1.14216e-17 | 1.000000 |
| rad52                         | 2.04622e-18 | 1.000000 | 2.04622e-18 | 1.000000 |
| PAH1+H                        | 1.76935e-18 | 1.000000 | 1.76935e-18 | 1.000000 |
| rad34                         | 7.56091e-19 | 1.000000 | 7.56091e-19 | 1.000000 |
| rad51                         | 5.42158e-19 | 1.000000 | 5.42158e-19 | 1.000000 |
| rad55                         | 2.06671e-19 | 1.000000 | 2.06671e-19 | 1.000000 |
| rad41                         | 1.20599e-19 | 1.000000 | 1.20599e-19 | 1.000000 |
| rad42                         | 6.48815e-20 | 1.000000 | 6.48815e-20 | 1.000000 |
| rad65                         | 8.33570e-21 | 1.000000 | 8.33570e-21 | 1.000000 |
| rad47                         | 1.65123e-24 | 1.000000 | 1.65123e-24 | 1.000000 |
| rad53                         | 1.08570e-24 | 1.000000 | 1.08570e-24 | 1.000000 |
| rad61                         | 5.88934e-26 | 1.000000 | 5.88934e-26 | 1.000000 |
| rad64                         | 7.04313e-27 | 1.000000 | 7.04313e-27 | 1.000000 |
| rad68syn                      | 1.49239e-28 | 1.000000 | 1.49239e-28 | 1.000000 |
| rad68anti                     | 1.19684e-28 | 1.000000 | 1.19684e-28 | 1.000000 |
| rad56                         | 5.26622e-29 | 1.000000 | 5.26622e-29 | 1.000000 |
| rad40syn                      | 6.16695e-32 | 1.000000 | 6.16695e-32 | 1.000000 |
| rad40anti                     | 4.98386e-32 | 1.000000 | 4.98386e-32 | 1.000000 |

|          |             |          |             |          |
|----------|-------------|----------|-------------|----------|
| rad73    | 1.19205e-33 | 1.000000 | 1.19205e-33 | 1.000000 |
| PAH8+H   | 4.37654e-34 | 1.000000 | 4.37654e-34 | 1.000000 |
| rad19syn | 2.11210e-34 | 1.000000 | 2.11210e-34 | 1.000000 |
| rad71    | 8.12993e-38 | 1.000000 | 8.12993e-38 | 1.000000 |
| rad8     | 2.52372e-48 | 1.000000 | 2.52372e-48 | 1.000000 |

1000.00000 Pa, 140.000000 K

| Rate constant             | True (fraction)        | Effective (fraction)   |
|---------------------------|------------------------|------------------------|
| Total                     | 4.99515e-15 (1.00 )    | 4.99515e-15 (1.00 )    |
| Formation of rad19        | 4.99514e-15 (1.000 )   | 4.99514e-15 (1.000 )   |
| H-abstraction to cyc2enyl | 5.62488e-21 (1.13e-06) | 5.62488e-21 (1.13e-06) |
| H-abstraction to cyclenyl | 3.00047e-26 (6.01e-12) | 3.00047e-26 (6.01e-12) |

| species                       | PYtrue      | Cumul    | PYeffective | Cumul    |
|-------------------------------|-------------|----------|-------------|----------|
| rad9                          | 0.812086    | 0.812086 | 0.812086    | 0.812086 |
| Indene+H                      | 0.186597    | 0.998683 | 0.186597    | 0.998683 |
| rad15                         | 0.00128652  | 0.999969 | 0.00128652  | 0.999969 |
| PhCHCCH2+H                    | 2.69591e-05 | 0.999996 | 2.69591e-05 | 0.999996 |
| rad6                          | 1.27306e-06 | 0.999998 | 1.27306e-06 | 0.999998 |
| Benzene+cycloprop-2-enylidene | 1.12607e-06 | 0.999999 | 1.12607e-06 | 0.999999 |
| rad2                          | 7.71302e-07 | 1.000000 | 7.71302e-07 | 1.000000 |
| rad26                         | 1.57252e-07 | 1.000000 | 1.57252e-07 | 1.000000 |
| C2H2+PhCH2                    | 1.23328e-07 | 1.000000 | 1.23328e-07 | 1.000000 |
| rad10                         | 9.06714e-08 | 1.000000 | 9.06714e-08 | 1.000000 |
| rad23                         | 8.08503e-08 | 1.000000 | 8.08503e-08 | 1.000000 |
| PhCCH+CH3                     | 6.02642e-08 | 1.000000 | 6.02642e-08 | 1.000000 |
| rad67                         | 5.72855e-08 | 1.000000 | 5.72855e-08 | 1.000000 |
| rad1                          | 5.04237e-08 | 1.000000 | 5.04237e-08 | 1.000000 |
| PhCCCH3+H                     | 4.29860e-08 | 1.000000 | 4.29860e-08 | 1.000000 |
| Ph+MeAc                       | 2.90234e-08 | 1.000000 | 2.90234e-08 | 1.000000 |
| rad35                         | 2.54123e-08 | 1.000000 | 2.54123e-08 | 1.000000 |
| rad45                         | 1.19491e-08 | 1.000000 | 1.19491e-08 | 1.000000 |
| rad3                          | 1.04608e-08 | 1.000000 | 1.04608e-08 | 1.000000 |
| rad12                         | 6.26222e-09 | 1.000000 | 6.26222e-09 | 1.000000 |
| rad4                          | 5.32861e-09 | 1.000000 | 5.32861e-09 | 1.000000 |
| rad19anti                     | 3.83326e-09 | 1.000000 | 3.83326e-09 | 1.000000 |
| rad11                         | 1.84360e-09 | 1.000000 | 1.84360e-09 | 1.000000 |
| Ph+Allene                     | 1.37572e-09 | 1.000000 | 1.37572e-09 | 1.000000 |
| rad22                         | 9.85797e-10 | 1.000000 | 9.85797e-10 | 1.000000 |
| rad7                          | 8.60102e-10 | 1.000000 | 8.60102e-10 | 1.000000 |
| rad36                         | 7.33590e-10 | 1.000000 | 7.33590e-10 | 1.000000 |
| rad30                         | 4.42837e-10 | 1.000000 | 4.42837e-10 | 1.000000 |
| PhCH2CCH+H                    | 2.53600e-10 | 1.000000 | 2.53600e-10 | 1.000000 |
| rad28                         | 9.10027e-11 | 1.000000 | 9.10027e-11 | 1.000000 |
| rad5                          | 3.82201e-11 | 1.000000 | 3.82201e-11 | 1.000000 |
| rad37                         | 2.80282e-11 | 1.000000 | 2.80282e-11 | 1.000000 |
| Benzene+cycloprop-1-enylidene | 6.00677e-12 | 1.000000 | 6.00677e-12 | 1.000000 |
| rad13                         | 3.72475e-12 | 1.000000 | 3.72475e-12 | 1.000000 |
| PhcycC3H3_A+H                 | 3.60895e-12 | 1.000000 | 3.60895e-12 | 1.000000 |
| rad14                         | 2.73501e-12 | 1.000000 | 2.73501e-12 | 1.000000 |
| rad27                         | 2.49408e-12 | 1.000000 | 2.49408e-12 | 1.000000 |
| PAH9+H                        | 2.40243e-12 | 1.000000 | 2.40243e-12 | 1.000000 |
| rad60syn                      | 1.93628e-12 | 1.000000 | 1.93628e-12 | 1.000000 |
| rad18                         | 1.44468e-12 | 1.000000 | 1.44468e-12 | 1.000000 |
| rad38                         | 1.11776e-12 | 1.000000 | 1.11776e-12 | 1.000000 |
| PAH7+H                        | 1.04625e-12 | 1.000000 | 1.04625e-12 | 1.000000 |
| rad60anti                     | 9.47947e-13 | 1.000000 | 9.47947e-13 | 1.000000 |
| PAH3+H                        | 8.19786e-13 | 1.000000 | 8.19786e-13 | 1.000000 |
| rad59                         | 1.67877e-13 | 1.000000 | 1.67877e-13 | 1.000000 |
| rad20                         | 7.57636e-14 | 1.000000 | 7.57636e-14 | 1.000000 |
| rad46                         | 6.73123e-14 | 1.000000 | 6.73123e-14 | 1.000000 |
| rad21                         | 4.89183e-14 | 1.000000 | 4.89183e-14 | 1.000000 |
| rad39                         | 3.66228e-14 | 1.000000 | 3.66228e-14 | 1.000000 |
| PAH10+CH3                     | 3.42822e-14 | 1.000000 | 3.42822e-14 | 1.000000 |
| rad25                         | 3.18787e-14 | 1.000000 | 3.18787e-14 | 1.000000 |
| Phenyl+cycC3H4                | 1.75977e-14 | 1.000000 | 0.000000    | 1.000000 |
| rad43                         | 4.79089e-15 | 1.000000 | 4.79089e-15 | 1.000000 |
| rad33                         | 4.50843e-15 | 1.000000 | 4.50843e-15 | 1.000000 |
| PhcycC3H3_B+H                 | 1.91902e-15 | 1.000000 | 1.91902e-15 | 1.000000 |
| rad62                         | 7.29614e-16 | 1.000000 | 7.29614e-16 | 1.000000 |
| rad50                         | 4.19015e-16 | 1.000000 | 4.19015e-16 | 1.000000 |
| rad24                         | 1.61235e-16 | 1.000000 | 1.61235e-16 | 1.000000 |
| rad70                         | 7.32370e-17 | 1.000000 | 7.32370e-17 | 1.000000 |
| rad54                         | 3.89937e-17 | 1.000000 | 3.89937e-17 | 1.000000 |
| rad31                         | 1.96167e-17 | 1.000000 | 1.96167e-17 | 1.000000 |
| rad58                         | 1.50279e-17 | 1.000000 | 1.50279e-17 | 1.000000 |
| PAH1+H                        | 2.85986e-18 | 1.000000 | 2.85986e-18 | 1.000000 |

|           |             |         |             |         |
|-----------|-------------|---------|-------------|---------|
| rad52     | 2.79509e-18 | 1.00000 | 2.79509e-18 | 1.00000 |
| rad34     | 1.07420e-18 | 1.00000 | 1.07420e-18 | 1.00000 |
| rad51     | 7.70871e-19 | 1.00000 | 7.70871e-19 | 1.00000 |
| rad55     | 3.15483e-19 | 1.00000 | 3.15483e-19 | 1.00000 |
| rad41     | 2.05805e-19 | 1.00000 | 2.05805e-19 | 1.00000 |
| rad42     | 1.09769e-19 | 1.00000 | 1.09769e-19 | 1.00000 |
| rad65     | 1.24384e-20 | 1.00000 | 1.24384e-20 | 1.00000 |
| rad53     | 2.95169e-24 | 1.00000 | 2.95169e-24 | 1.00000 |
| rad47     | 1.87646e-24 | 1.00000 | 1.87646e-24 | 1.00000 |
| rad61     | 3.18700e-25 | 1.00000 | 3.18700e-25 | 1.00000 |
| rad64     | 2.65346e-26 | 1.00000 | 2.65346e-26 | 1.00000 |
| rad68syn  | 1.07489e-27 | 1.00000 | 1.07489e-27 | 1.00000 |
| rad68anti | 8.57545e-28 | 1.00000 | 8.57545e-28 | 1.00000 |
| rad56     | 3.60906e-28 | 1.00000 | 3.60906e-28 | 1.00000 |
| rad40syn  | 9.14902e-31 | 1.00000 | 9.14902e-31 | 1.00000 |
| rad40anti | 7.46362e-31 | 1.00000 | 7.46362e-31 | 1.00000 |
| rad73     | 1.54174e-32 | 1.00000 | 1.54174e-32 | 1.00000 |
| PAH8+H    | 1.05952e-32 | 1.00000 | 1.05952e-32 | 1.00000 |
| rad19syn  | 4.99941e-34 | 1.00000 | 4.99941e-34 | 1.00000 |
| rad71     | 2.43933e-36 | 1.00000 | 2.43933e-36 | 1.00000 |
| rad8      | 2.97498e-48 | 1.00000 | 2.97498e-48 | 1.00000 |

1000.00000 Pa, 150.000000 K

| Rate constant             | True (fraction)        | Effective (fraction)   |
|---------------------------|------------------------|------------------------|
| Total                     | 6.34137e-15 (1.00 )    | 6.34137e-15 (1.00 )    |
| Formation of rad19        | 6.34135e-15 (1.000 )   | 6.34135e-15 (1.000 )   |
| H-abstraction to cyc2enyl | 1.81685e-20 (2.87e-06) | 1.81685e-20 (2.87e-06) |
| H-abstraction to cyclenyl | 2.23765e-25 (3.53e-11) | 2.23765e-25 (3.53e-11) |

| species                       | PYtrue      | Cumul    | PYeffective | Cumul    |
|-------------------------------|-------------|----------|-------------|----------|
| rad9                          | 0.797638    | 0.797638 | 0.797638    | 0.797638 |
| Indene+H                      | 0.201075    | 0.998713 | 0.201075    | 0.998713 |
| rad15                         | 0.00125034  | 0.999963 | 0.00125034  | 0.999963 |
| PhCHCCH2+H                    | 3.02252e-05 | 0.999994 | 3.02252e-05 | 0.999994 |
| Benzene+cycloprop-2-enylidene | 2.86508e-06 | 0.999997 | 2.86508e-06 | 0.999997 |
| rad6                          | 1.43490e-06 | 0.999998 | 1.43490e-06 | 0.999998 |
| rad2                          | 8.45117e-07 | 0.999999 | 8.45117e-07 | 0.999999 |
| rad26                         | 1.76117e-07 | 0.999999 | 1.76117e-07 | 0.999999 |
| C2H2+PhCH2                    | 1.40261e-07 | 0.999999 | 1.40261e-07 | 0.999999 |
| rad10                         | 9.97041e-08 | 0.999999 | 9.97041e-08 | 0.999999 |
| rad23                         | 8.69031e-08 | 0.999999 | 8.69031e-08 | 0.999999 |
| PhCCH+CH3                     | 7.54880e-08 | 0.999999 | 7.54880e-08 | 0.999999 |
| rad67                         | 6.52183e-08 | 0.999999 | 6.52183e-08 | 0.999999 |
| rad1                          | 5.55206e-08 | 1.000000 | 5.55206e-08 | 1.000000 |
| PhCCCH3+H                     | 5.36832e-08 | 1.000000 | 5.36832e-08 | 1.000000 |
| Ph+MeAc                       | 3.67417e-08 | 1.000000 | 3.67417e-08 | 1.000000 |
| rad35                         | 2.88668e-08 | 1.000000 | 2.88668e-08 | 1.000000 |
| rad45                         | 1.26007e-08 | 1.000000 | 1.26007e-08 | 1.000000 |
| rad3                          | 1.14366e-08 | 1.000000 | 1.14366e-08 | 1.000000 |
| rad12                         | 6.09398e-09 | 1.000000 | 6.09398e-09 | 1.000000 |
| rad4                          | 5.83306e-09 | 1.000000 | 5.83306e-09 | 1.000000 |
| rad19anti                     | 3.67847e-09 | 1.000000 | 3.67847e-09 | 1.000000 |
| rad11                         | 1.73128e-09 | 1.000000 | 1.73128e-09 | 1.000000 |
| Ph+Allene                     | 1.62472e-09 | 1.000000 | 1.62472e-09 | 1.000000 |
| rad7                          | 9.54065e-10 | 1.000000 | 9.54065e-10 | 1.000000 |
| rad22                         | 9.11896e-10 | 1.000000 | 9.11896e-10 | 1.000000 |
| rad36                         | 7.74492e-10 | 1.000000 | 7.74492e-10 | 1.000000 |
| rad30                         | 5.03603e-10 | 1.000000 | 5.03603e-10 | 1.000000 |
| PhCH2CCH+H                    | 3.04170e-10 | 1.000000 | 3.04170e-10 | 1.000000 |
| rad28                         | 1.15843e-10 | 1.000000 | 1.15843e-10 | 1.000000 |
| rad5                          | 3.84492e-11 | 1.000000 | 3.84492e-11 | 1.000000 |
| rad37                         | 3.64203e-11 | 1.000000 | 3.64203e-11 | 1.000000 |
| Benzene+cycloprop-1-enylidene | 3.52865e-11 | 1.000000 | 3.52865e-11 | 1.000000 |
| PhcycC3H3_A+H                 | 4.59985e-12 | 1.000000 | 4.59985e-12 | 1.000000 |
| rad13                         | 4.09314e-12 | 1.000000 | 4.09314e-12 | 1.000000 |
| PAH9+H                        | 3.02967e-12 | 1.000000 | 3.02967e-12 | 1.000000 |
| rad14                         | 2.94664e-12 | 1.000000 | 2.94664e-12 | 1.000000 |
| rad27                         | 2.67563e-12 | 1.000000 | 2.67563e-12 | 1.000000 |
| rad60syn                      | 2.25022e-12 | 1.000000 | 2.25022e-12 | 1.000000 |
| rad38                         | 1.39866e-12 | 1.000000 | 1.39866e-12 | 1.000000 |
| PAH7+H                        | 1.29835e-12 | 1.000000 | 1.29835e-12 | 1.000000 |
| rad18                         | 1.23573e-12 | 1.000000 | 1.23573e-12 | 1.000000 |
| rad60anti                     | 1.10379e-12 | 1.000000 | 1.10379e-12 | 1.000000 |
| PAH3+H                        | 9.79214e-13 | 1.000000 | 9.79214e-13 | 1.000000 |
| rad59                         | 1.99684e-13 | 1.000000 | 1.99684e-13 | 1.000000 |
| rad46                         | 8.48307e-14 | 1.000000 | 8.48307e-14 | 1.000000 |
| rad20                         | 6.58710e-14 | 1.000000 | 6.58710e-14 | 1.000000 |

|                |             |          |             |          |
|----------------|-------------|----------|-------------|----------|
| rad39          | 5.49585e-14 | 1.000000 | 5.49585e-14 | 1.000000 |
| PAH10+CH3      | 4.88302e-14 | 1.000000 | 4.88302e-14 | 1.000000 |
| rad21          | 4.24873e-14 | 1.000000 | 4.24873e-14 | 1.000000 |
| rad25          | 2.93401e-14 | 1.000000 | 2.93401e-14 | 1.000000 |
| Phenyl+cycC3H4 | 2.61241e-14 | 1.000000 | 0.00000     | 1.000000 |
| rad43          | 6.62367e-15 | 1.000000 | 6.62367e-15 | 1.000000 |
| rad33          | 4.95001e-15 | 1.000000 | 4.95001e-15 | 1.000000 |
| PhcycC3H3_B+H  | 4.02012e-15 | 1.000000 | 4.02012e-15 | 1.000000 |
| rad62          | 1.02890e-15 | 1.000000 | 1.02890e-15 | 1.000000 |
| rad50          | 5.53848e-16 | 1.000000 | 5.53848e-16 | 1.000000 |
| rad24          | 1.67729e-16 | 1.000000 | 1.67729e-16 | 1.000000 |
| rad70          | 9.76208e-17 | 1.000000 | 9.76208e-17 | 1.000000 |
| rad54          | 5.66587e-17 | 1.000000 | 5.66587e-17 | 1.000000 |
| rad31          | 2.22913e-17 | 1.000000 | 2.22913e-17 | 1.000000 |
| rad58          | 1.99135e-17 | 1.000000 | 1.99135e-17 | 1.000000 |
| PAH1+H         | 4.67317e-18 | 1.000000 | 4.67317e-18 | 1.000000 |
| rad52          | 3.82992e-18 | 1.000000 | 3.82992e-18 | 1.000000 |
| rad34          | 1.53877e-18 | 1.000000 | 1.53877e-18 | 1.000000 |
| rad51          | 1.10268e-18 | 1.000000 | 1.10268e-18 | 1.000000 |
| rad55          | 4.85337e-19 | 1.000000 | 4.85337e-19 | 1.000000 |
| rad41          | 3.52755e-19 | 1.000000 | 3.52755e-19 | 1.000000 |
| rad42          | 1.85782e-19 | 1.000000 | 1.85782e-19 | 1.000000 |
| rad65          | 1.86442e-20 | 1.000000 | 1.86442e-20 | 1.000000 |
| rad53          | 7.76133e-24 | 1.000000 | 7.76133e-24 | 1.000000 |
| rad47          | 2.13656e-24 | 1.000000 | 2.13656e-24 | 1.000000 |
| rad61          | 1.51195e-24 | 1.000000 | 1.51195e-24 | 1.000000 |
| rad64          | 9.53057e-26 | 1.000000 | 9.53057e-26 | 1.000000 |
| rad68syn       | 6.35570e-27 | 1.000000 | 6.35570e-27 | 1.000000 |
| rad68anti      | 5.04254e-27 | 1.000000 | 5.04254e-27 | 1.000000 |
| rad56          | 2.11421e-27 | 1.000000 | 2.11421e-27 | 1.000000 |
| rad40syn       | 1.04259e-29 | 1.000000 | 1.04259e-29 | 1.000000 |
| rad40anti      | 8.59259e-30 | 1.000000 | 8.59259e-30 | 1.000000 |
| PAH8+H         | 1.87189e-31 | 1.000000 | 1.87189e-31 | 1.000000 |
| rad73          | 1.58243e-31 | 1.000000 | 1.58243e-31 | 1.000000 |
| rad19syn       | 1.24238e-33 | 1.000000 | 1.24238e-33 | 1.000000 |
| rad71          | 5.26529e-35 | 1.000000 | 5.26529e-35 | 1.000000 |
| rad8           | 3.63844e-48 | 1.000000 | 3.63844e-48 | 1.000000 |

1000.00000 Pa, 160.000000 K

=====

| Rate constant             | True (fraction)        | Effective (fraction)   |
|---------------------------|------------------------|------------------------|
| Total                     | 7.84423e-15 (1.00 )    | 7.84423e-15 (1.00 )    |
| Formation of rad19        | 7.84418e-15 (1.000 )   | 7.84418e-15 (1.000 )   |
| H-abstraction to cyc2enyl | 5.05321e-20 (6.44e-06) | 5.05321e-20 (6.44e-06) |
| H-abstraction to cyclenyl | 1.29479e-24 (1.65e-10) | 1.29479e-24 (1.65e-10) |

| species                       | PYtrue      | Cumul    | PYeffective | Cumul    |
|-------------------------------|-------------|----------|-------------|----------|
| rad9                          | 0.782893    | 0.782893 | 0.782893    | 0.782893 |
| Indene+H                      | 0.215848    | 0.998741 | 0.215848    | 0.998741 |
| rad15                         | 0.00121533  | 0.999956 | 0.00121533  | 0.999956 |
| PhCHCCH2+H                    | 3.38322e-05 | 0.999990 | 3.38322e-05 | 0.999990 |
| Benzene+cycloprop-2-enylidene | 6.44194e-06 | 0.999996 | 6.44194e-06 | 0.999996 |
| rad6                          | 1.61479e-06 | 0.999998 | 1.61479e-06 | 0.999998 |
| rad2                          | 9.22317e-07 | 0.999999 | 9.22317e-07 | 0.999999 |
| rad26                         | 1.96829e-07 | 0.999999 | 1.96829e-07 | 0.999999 |
| C2H2+PhCH2                    | 1.59374e-07 | 0.999999 | 1.59374e-07 | 0.999999 |
| rad10                         | 1.09074e-07 | 0.999999 | 1.09074e-07 | 0.999999 |
| PhCCH+CH3                     | 9.40457e-08 | 0.999999 | 9.40457e-08 | 0.999999 |
| rad23                         | 9.30255e-08 | 0.999999 | 9.30255e-08 | 0.999999 |
| rad67                         | 7.41878e-08 | 0.999999 | 7.41878e-08 | 0.999999 |
| PhCCCH3+H                     | 6.67933e-08 | 1.000000 | 6.67933e-08 | 1.000000 |
| rad1                          | 6.09179e-08 | 1.000000 | 6.09179e-08 | 1.000000 |
| Ph+MeAc                       | 4.63778e-08 | 1.000000 | 4.63778e-08 | 1.000000 |
| rad35                         | 3.27594e-08 | 1.000000 | 3.27594e-08 | 1.000000 |
| rad45                         | 1.32555e-08 | 1.000000 | 1.32555e-08 | 1.000000 |
| rad3                          | 1.24528e-08 | 1.000000 | 1.24528e-08 | 1.000000 |
| rad4                          | 6.36029e-09 | 1.000000 | 6.36029e-09 | 1.000000 |
| rad12                         | 5.93815e-09 | 1.000000 | 5.93815e-09 | 1.000000 |
| rad19anti                     | 3.54053e-09 | 1.000000 | 3.54053e-09 | 1.000000 |
| Ph+Allene                     | 1.92059e-09 | 1.000000 | 1.92059e-09 | 1.000000 |
| rad11                         | 1.64919e-09 | 1.000000 | 1.64919e-09 | 1.000000 |
| rad7                          | 1.05794e-09 | 1.000000 | 1.05794e-09 | 1.000000 |
| rad22                         | 8.51647e-10 | 1.000000 | 8.51647e-10 | 1.000000 |
| rad36                         | 8.15915e-10 | 1.000000 | 8.15915e-10 | 1.000000 |
| rad30                         | 5.72221e-10 | 1.000000 | 5.72221e-10 | 1.000000 |
| PhCH2CCH+H                    | 3.65483e-10 | 1.000000 | 3.65483e-10 | 1.000000 |
| Benzene+cycloprop-1-enylidene | 1.65062e-10 | 1.000000 | 1.65062e-10 | 1.000000 |
| rad28                         | 1.47024e-10 | 1.000000 | 1.47024e-10 | 1.000000 |

|                |             |          |             |          |
|----------------|-------------|----------|-------------|----------|
| rad37          | 4.73258e-11 | 1.000000 | 4.73258e-11 | 1.000000 |
| rad5           | 3.84922e-11 | 1.000000 | 3.84922e-11 | 1.000000 |
| PhcycC3H3_A+H  | 5.90691e-12 | 1.000000 | 5.90691e-12 | 1.000000 |
| rad13          | 4.50076e-12 | 1.000000 | 4.50076e-12 | 1.000000 |
| PAH9+H         | 3.80654e-12 | 1.000000 | 3.80654e-12 | 1.000000 |
| rad14          | 3.16578e-12 | 1.000000 | 3.16578e-12 | 1.000000 |
| rad27          | 2.86434e-12 | 1.000000 | 2.86434e-12 | 1.000000 |
| rad60syn       | 2.61653e-12 | 1.000000 | 2.61653e-12 | 1.000000 |
| rad38          | 1.74857e-12 | 1.000000 | 1.74857e-12 | 1.000000 |
| PAH7+H         | 1.62432e-12 | 1.000000 | 1.62432e-12 | 1.000000 |
| rad60anti      | 1.28614e-12 | 1.000000 | 1.28614e-12 | 1.000000 |
| PAH3+H         | 1.17252e-12 | 1.000000 | 1.17252e-12 | 1.000000 |
| rad18          | 1.07013e-12 | 1.000000 | 1.07013e-12 | 1.000000 |
| rad59          | 2.38024e-13 | 1.000000 | 2.38024e-13 | 1.000000 |
| rad46          | 1.06810e-13 | 1.000000 | 1.06810e-13 | 1.000000 |
| rad39          | 8.25824e-14 | 1.000000 | 8.25824e-14 | 1.000000 |
| PAH10+CH3      | 7.00419e-14 | 1.000000 | 7.00419e-14 | 1.000000 |
| rad20          | 5.83410e-14 | 1.000000 | 5.83410e-14 | 1.000000 |
| Phenyl+cycC3H4 | 3.86827e-14 | 1.000000 | 0.00000     | 1.000000 |
| rad21          | 3.75977e-14 | 1.000000 | 3.75977e-14 | 1.000000 |
| rad25          | 2.73943e-14 | 1.000000 | 2.73943e-14 | 1.000000 |
| rad43          | 9.18142e-15 | 1.000000 | 9.18142e-15 | 1.000000 |
| PhcycC3H3_B+H  | 7.98856e-15 | 1.000000 | 7.98856e-15 | 1.000000 |
| rad33          | 5.43979e-15 | 1.000000 | 5.43979e-15 | 1.000000 |
| rad62          | 1.45114e-15 | 1.000000 | 1.45114e-15 | 1.000000 |
| rad50          | 7.34067e-16 | 1.000000 | 7.34067e-16 | 1.000000 |
| rad24          | 1.74412e-16 | 1.000000 | 1.74412e-16 | 1.000000 |
| rad70          | 1.31098e-16 | 1.000000 | 1.31098e-16 | 1.000000 |
| rad54          | 8.29297e-17 | 1.000000 | 8.29297e-17 | 1.000000 |
| rad58          | 2.66104e-17 | 1.000000 | 2.66104e-17 | 1.000000 |
| rad31          | 2.53154e-17 | 1.000000 | 2.53154e-17 | 1.000000 |
| PAH1+H         | 7.72776e-18 | 1.000000 | 7.72776e-18 | 1.000000 |
| rad52          | 5.27618e-18 | 1.000000 | 5.27618e-18 | 1.000000 |
| rad34          | 2.22531e-18 | 1.000000 | 2.22531e-18 | 1.000000 |
| rad51          | 1.59041e-18 | 1.000000 | 1.59041e-18 | 1.000000 |
| rad55          | 7.54350e-19 | 1.000000 | 7.54350e-19 | 1.000000 |
| rad41          | 6.07166e-19 | 1.000000 | 6.07166e-19 | 1.000000 |
| rad42          | 3.14680e-19 | 1.000000 | 3.14680e-19 | 1.000000 |
| rad65          | 2.81418e-20 | 1.000000 | 2.81418e-20 | 1.000000 |
| rad53          | 1.98532e-23 | 1.000000 | 1.98532e-23 | 1.000000 |
| rad61          | 6.39355e-24 | 1.000000 | 6.39355e-24 | 1.000000 |
| rad47          | 2.43963e-24 | 1.000000 | 2.43963e-24 | 1.000000 |
| rad64          | 3.27919e-25 | 1.000000 | 3.27919e-25 | 1.000000 |
| rad68syn       | 3.17434e-26 | 1.000000 | 3.17434e-26 | 1.000000 |
| rad68anti      | 2.50333e-26 | 1.000000 | 2.50333e-26 | 1.000000 |
| rad56          | 1.07979e-26 | 1.000000 | 1.07979e-26 | 1.000000 |
| rad40syn       | 9.35657e-29 | 1.000000 | 9.35657e-29 | 1.000000 |
| rad40anti      | 7.79007e-29 | 1.000000 | 7.79007e-29 | 1.000000 |
| PAH8+H         | 2.48167e-30 | 1.000000 | 2.48167e-30 | 1.000000 |
| rad73          | 1.31915e-30 | 1.000000 | 1.31915e-30 | 1.000000 |
| rad19syn       | 3.24506e-33 | 1.000000 | 3.24506e-33 | 1.000000 |
| rad71          | 8.41945e-34 | 1.000000 | 8.41945e-34 | 1.000000 |
| rad8           | 4.59801e-48 | 1.000000 | 4.59801e-48 | 1.000000 |

1000.00000 Pa, 170.000000 K

| Rate constant             | True (fraction)        | Effective (fraction)   |
|---------------------------|------------------------|------------------------|
| Total                     | 9.49598e-15 (1.00 )    | 9.49598e-15 (1.00 )    |
| Formation of rad19        | 9.49586e-15 (1.000 )   | 9.49586e-15 (1.000 )   |
| H-abstraction to cyc2enyl | 1.24279e-19 (1.31e-05) | 1.24279e-19 (1.31e-05) |
| H-abstraction to cyclenyl | 6.08025e-24 (6.40e-10) | 6.08025e-24 (6.40e-10) |

| species                       | PYtrue      | Cumul    | PYeffective | Cumul    |
|-------------------------------|-------------|----------|-------------|----------|
| rad9                          | 0.767802    | 0.767802 | 0.767802    | 0.767802 |
| Indene+H                      | 0.230962    | 0.998764 | 0.230962    | 0.998764 |
| rad15                         | 0.00118120  | 0.999945 | 0.00118120  | 0.999945 |
| PhCHCCH2+H                    | 3.78376e-05 | 0.999983 | 3.78376e-05 | 0.999983 |
| Benzene+cycloprop-2-enylidene | 1.30875e-05 | 0.999996 | 1.30875e-05 | 0.999996 |
| rad6                          | 1.81583e-06 | 0.999998 | 1.81583e-06 | 0.999998 |
| rad2                          | 1.00294e-06 | 0.999999 | 1.00294e-06 | 0.999999 |
| rad26                         | 2.19642e-07 | 0.999999 | 2.19642e-07 | 0.999999 |
| C2H2+PhCH2                    | 1.81085e-07 | 0.999999 | 1.81085e-07 | 0.999999 |
| rad10                         | 1.18792e-07 | 0.999999 | 1.18792e-07 | 0.999999 |
| PhCCH+CH3                     | 1.16684e-07 | 1.000000 | 1.16684e-07 | 1.000000 |
| rad23                         | 9.92242e-08 | 1.000000 | 9.92242e-08 | 1.000000 |
| rad67                         | 8.43907e-08 | 1.000000 | 8.43907e-08 | 1.000000 |
| PhCCCH3+H                     | 8.28934e-08 | 1.000000 | 8.28934e-08 | 1.000000 |
| rad1                          | 6.66319e-08 | 1.000000 | 6.66319e-08 | 1.000000 |

|                               |             |          |             |          |
|-------------------------------|-------------|----------|-------------|----------|
| Ph+MeAc                       | 5.84410e-08 | 1.000000 | 5.84410e-08 | 1.000000 |
| rad35                         | 3.71719e-08 | 1.000000 | 3.71719e-08 | 1.000000 |
| rad45                         | 1.39148e-08 | 1.000000 | 1.39148e-08 | 1.000000 |
| rad3                          | 1.35101e-08 | 1.000000 | 1.35101e-08 | 1.000000 |
| rad4                          | 6.91098e-09 | 1.000000 | 6.91098e-09 | 1.000000 |
| rad12                         | 5.79220e-09 | 1.000000 | 5.79220e-09 | 1.000000 |
| rad19anti                     | 3.41676e-09 | 1.000000 | 3.41676e-09 | 1.000000 |
| Ph+Allene                     | 2.27504e-09 | 1.000000 | 2.27504e-09 | 1.000000 |
| rad11                         | 1.59272e-09 | 1.000000 | 1.59272e-09 | 1.000000 |
| rad7                          | 1.17346e-09 | 1.000000 | 1.17346e-09 | 1.000000 |
| rad36                         | 8.57985e-10 | 1.000000 | 8.57985e-10 | 1.000000 |
| rad22                         | 8.02299e-10 | 1.000000 | 8.02299e-10 | 1.000000 |
| rad30                         | 6.50194e-10 | 1.000000 | 6.50194e-10 | 1.000000 |
| Benzene+cycloprop-1-enylidene | 6.40297e-10 | 1.000000 | 6.40297e-10 | 1.000000 |
| PhCH2CCH+H                    | 4.40461e-10 | 1.000000 | 4.40461e-10 | 1.000000 |
| rad28                         | 1.86349e-10 | 1.000000 | 1.86349e-10 | 1.000000 |
| rad37                         | 6.15975e-11 | 1.000000 | 6.15975e-11 | 1.000000 |
| rad5                          | 3.83633e-11 | 1.000000 | 3.83633e-11 | 1.000000 |
| PhcycC3H3_A+H                 | 7.64030e-12 | 1.000000 | 7.64030e-12 | 1.000000 |
| rad13                         | 4.95436e-12 | 1.000000 | 4.95436e-12 | 1.000000 |
| PAH9+H                        | 4.77330e-12 | 1.000000 | 4.77330e-12 | 1.000000 |
| rad14                         | 3.39257e-12 | 1.000000 | 3.39257e-12 | 1.000000 |
| rad27                         | 3.06023e-12 | 1.000000 | 3.06023e-12 | 1.000000 |
| rad60syn                      | 3.04710e-12 | 1.000000 | 3.04710e-12 | 1.000000 |
| rad38                         | 2.18770e-12 | 1.000000 | 2.18770e-12 | 1.000000 |
| PAH7+H                        | 2.05373e-12 | 1.000000 | 2.05373e-12 | 1.000000 |
| rad60anti                     | 1.50109e-12 | 1.000000 | 1.50109e-12 | 1.000000 |
| PAH3+H                        | 1.40894e-12 | 1.000000 | 1.40894e-12 | 1.000000 |
| rad18                         | 9.37226e-13 | 1.000000 | 9.37226e-13 | 1.000000 |
| rad59                         | 2.84622e-13 | 1.000000 | 2.84622e-13 | 1.000000 |
| rad46                         | 1.34571e-13 | 1.000000 | 1.34571e-13 | 1.000000 |
| rad39                         | 1.24587e-13 | 1.000000 | 1.24587e-13 | 1.000000 |
| PAH10+CH3                     | 1.01332e-13 | 1.000000 | 1.01332e-13 | 1.000000 |
| Phenyl+cycC3H4                | 5.71889e-14 | 1.000000 | 0.00000     | 1.000000 |
| rad20                         | 5.25762e-14 | 1.000000 | 5.25762e-14 | 1.000000 |
| rad21                         | 3.38576e-14 | 1.000000 | 3.38576e-14 | 1.000000 |
| rad25                         | 2.59308e-14 | 1.000000 | 2.59308e-14 | 1.000000 |
| PhcycC3H3_B+H                 | 1.52150e-14 | 1.000000 | 1.52150e-14 | 1.000000 |
| rad43                         | 1.27725e-14 | 1.000000 | 1.27725e-14 | 1.000000 |
| rad33                         | 5.98615e-15 | 1.000000 | 5.98615e-15 | 1.000000 |
| rad62                         | 2.04925e-15 | 1.000000 | 2.04925e-15 | 1.000000 |
| rad50                         | 9.77258e-16 | 1.000000 | 9.77258e-16 | 1.000000 |
| rad24                         | 1.81301e-16 | 1.000000 | 1.81301e-16 | 1.000000 |
| rad70                         | 1.77580e-16 | 1.000000 | 1.77580e-16 | 1.000000 |
| rad54                         | 1.22520e-16 | 1.000000 | 1.22520e-16 | 1.000000 |
| rad58                         | 3.58913e-17 | 1.000000 | 3.58913e-17 | 1.000000 |
| rad31                         | 2.87523e-17 | 1.000000 | 2.87523e-17 | 1.000000 |
| PAH1+H                        | 1.29314e-17 | 1.000000 | 1.29314e-17 | 1.000000 |
| rad52                         | 7.32030e-18 | 1.000000 | 7.32030e-18 | 1.000000 |
| rad34                         | 3.25096e-18 | 1.000000 | 3.25096e-18 | 1.000000 |
| rad51                         | 2.31651e-18 | 1.000000 | 2.31651e-18 | 1.000000 |
| rad55                         | 1.18648e-18 | 1.000000 | 1.18648e-18 | 1.000000 |
| rad41                         | 1.04835e-18 | 1.000000 | 1.04835e-18 | 1.000000 |
| rad42                         | 5.33164e-19 | 1.000000 | 5.33164e-19 | 1.000000 |
| rad65                         | 4.28419e-20 | 1.000000 | 4.28419e-20 | 1.000000 |
| rad53                         | 4.96179e-23 | 1.000000 | 4.96179e-23 | 1.000000 |
| rad61                         | 2.44894e-23 | 1.000000 | 2.44894e-23 | 1.000000 |
| rad47                         | 2.79593e-24 | 1.000000 | 2.79593e-24 | 1.000000 |
| rad64                         | 1.08538e-24 | 1.000000 | 1.08538e-24 | 1.000000 |
| rad68syn                      | 1.37572e-25 | 1.000000 | 1.37572e-25 | 1.000000 |
| rad68anti                     | 1.07783e-25 | 1.000000 | 1.07783e-25 | 1.000000 |
| rad56                         | 4.90604e-26 | 1.000000 | 4.90604e-26 | 1.000000 |
| rad40syn                      | 6.82012e-28 | 1.000000 | 6.82012e-28 | 1.000000 |
| rad40anti                     | 5.73248e-28 | 1.000000 | 5.73248e-28 | 1.000000 |
| PAH8+H                        | 2.55449e-29 | 1.000000 | 2.55449e-29 | 1.000000 |
| rad73                         | 9.17626e-30 | 1.000000 | 9.17626e-30 | 1.000000 |
| rad71                         | 1.02680e-32 | 1.000000 | 1.02680e-32 | 1.000000 |
| rad19syn                      | 8.91654e-33 | 1.000000 | 8.91654e-33 | 1.000000 |
| rad8                          | 5.98507e-48 | 1.000000 | 5.98507e-48 | 1.000000 |

1000.00000 Pa, 180.000000 K

| Rate constant             | True (fraction)        | Effective (fraction)   |             |       |
|---------------------------|------------------------|------------------------|-------------|-------|
| Total                     | 1.12884e-14 (1.00 )    | 1.12884e-14 (1.00 )    |             |       |
| Formation of rad19        | 1.12881e-14 (1.000 )   | 1.12881e-14 (1.000 )   |             |       |
| H-abstraction to cyc2enyl | 2.75916e-19 (2.44e-05) | 2.75916e-19 (2.44e-05) |             |       |
| H-abstraction to cyclenyl | 2.39955e-23 (2.13e-09) | 2.39955e-23 (2.13e-09) |             |       |
| species                   | PYtrue                 | Cumul                  | PYeffective | Cumul |



|                               |             |          |             |          |
|-------------------------------|-------------|----------|-------------|----------|
| rad9                          | 0.752316    | 0.752316 | 0.752316    | 0.752316 |
| Indene+H                      | 0.246465    | 0.998781 | 0.246465    | 0.998781 |
| rad15                         | 0.00114771  | 0.999928 | 0.00114771  | 0.999928 |
| PhCHCCH2+H                    | 4.23082e-05 | 0.999971 | 4.23082e-05 | 0.999971 |
| Benzene+cycloprop-2-enylidene | 2.44424e-05 | 0.999995 | 2.44424e-05 | 0.999995 |
| rad6                          | 2.04155e-06 | 0.999997 | 2.04155e-06 | 0.999997 |
| rad2                          | 1.08690e-06 | 0.999998 | 1.08690e-06 | 0.999998 |
| rad26                         | 2.44837e-07 | 0.999998 | 2.44837e-07 | 0.999998 |
| C2H2+PhCH2                    | 2.05892e-07 | 0.999999 | 2.05892e-07 | 0.999999 |
| PhCCH+CH3                     | 1.44313e-07 | 0.999999 | 1.44313e-07 | 0.999999 |
| rad10                         | 1.28852e-07 | 0.999999 | 1.28852e-07 | 0.999999 |
| rad23                         | 1.05498e-07 | 0.999999 | 1.05498e-07 | 0.999999 |
| PhCCCH3+H                     | 1.02697e-07 | 0.999999 | 1.02697e-07 | 0.999999 |
| rad67                         | 9.60614e-08 | 0.999999 | 9.60614e-08 | 0.999999 |
| Ph+MeAc                       | 7.35763e-08 | 0.999999 | 7.35763e-08 | 0.999999 |
| rad1                          | 7.26728e-08 | 0.999999 | 7.26728e-08 | 0.999999 |
| rad35                         | 4.22013e-08 | 0.999999 | 4.22013e-08 | 0.999999 |
| rad3                          | 1.46074e-08 | 0.999999 | 1.46074e-08 | 0.999999 |
| rad45                         | 1.45787e-08 | 0.999999 | 1.45787e-08 | 0.999999 |
| rad4                          | 7.48504e-09 | 0.999999 | 7.48504e-09 | 0.999999 |
| rad12                         | 5.65411e-09 | 0.999999 | 5.65411e-09 | 0.999999 |
| rad19anti                     | 3.30513e-09 | 0.999999 | 3.30513e-09 | 0.999999 |
| Ph+Allene                     | 2.70298e-09 | 0.999999 | 2.70298e-09 | 0.999999 |
| Benzene+cycloprop-1-enylidene | 2.12567e-09 | 0.999999 | 2.12567e-09 | 0.999999 |
| rad11                         | 1.55878e-09 | 0.999999 | 1.55878e-09 | 0.999999 |
| rad7                          | 1.30259e-09 | 0.999999 | 1.30259e-09 | 0.999999 |
| rad36                         | 9.00775e-10 | 0.999999 | 9.00775e-10 | 0.999999 |
| rad22                         | 7.61799e-10 | 0.999999 | 7.61799e-10 | 0.999999 |
| rad30                         | 7.39314e-10 | 0.999999 | 7.39314e-10 | 0.999999 |
| PhCH2CCH+H                    | 5.32902e-10 | 0.999999 | 5.32902e-10 | 0.999999 |
| rad28                         | 2.36173e-10 | 0.999999 | 2.36173e-10 | 0.999999 |
| rad37                         | 8.04011e-11 | 0.999999 | 8.04011e-11 | 0.999999 |
| rad5                          | 3.80756e-11 | 0.999999 | 3.80756e-11 | 0.999999 |
| PhcycC3H3_A+H                 | 9.94922e-12 | 0.999999 | 9.94922e-12 | 0.999999 |
| PAH9+H                        | 5.98219e-12 | 0.999999 | 5.98219e-12 | 0.999999 |
| rad13                         | 5.46162e-12 | 0.999999 | 5.46162e-12 | 0.999999 |
| rad14                         | 3.62676e-12 | 0.999999 | 3.62676e-12 | 0.999999 |
| rad60syn                      | 3.55664e-12 | 0.999999 | 3.55664e-12 | 0.999999 |
| rad27                         | 3.26302e-12 | 0.999999 | 3.26302e-12 | 0.999999 |
| rad38                         | 2.74303e-12 | 0.999999 | 2.74303e-12 | 0.999999 |
| PAH7+H                        | 2.63036e-12 | 0.999999 | 2.63036e-12 | 0.999999 |
| rad60anti                     | 1.75624e-12 | 0.999999 | 1.75624e-12 | 0.999999 |
| PAH3+H                        | 1.70041e-12 | 0.999999 | 1.70041e-12 | 0.999999 |
| rad18                         | 8.29481e-13 | 0.999999 | 8.29481e-13 | 0.999999 |
| rad59                         | 3.41702e-13 | 0.999999 | 3.41702e-13 | 0.999999 |
| rad39                         | 1.89074e-13 | 0.999999 | 1.89074e-13 | 0.999999 |
| rad46                         | 1.69864e-13 | 0.999999 | 1.69864e-13 | 0.999999 |
| PAH10+CH3                     | 1.47982e-13 | 0.999999 | 1.47982e-13 | 0.999999 |
| Phenyl+cycC3H4                | 8.44562e-14 | 0.999999 | 0.00000     | 0.999999 |
| rad20                         | 4.81659e-14 | 0.999999 | 4.81659e-14 | 0.999999 |
| rad21                         | 3.09979e-14 | 0.999999 | 3.09979e-14 | 0.999999 |
| PhcycC3H3_B+H                 | 2.79905e-14 | 0.999999 | 2.79905e-14 | 0.999999 |
| rad25                         | 2.48728e-14 | 0.999999 | 2.48728e-14 | 0.999999 |
| rad43                         | 1.78392e-14 | 0.999999 | 1.78392e-14 | 0.999999 |
| rad33                         | 6.59864e-15 | 0.999999 | 6.59864e-15 | 0.999999 |
| rad62                         | 2.89899e-15 | 0.999999 | 2.89899e-15 | 0.999999 |
| rad50                         | 1.30848e-15 | 0.999999 | 1.30848e-15 | 0.999999 |
| rad70                         | 2.42786e-16 | 0.999999 | 2.42786e-16 | 0.999999 |
| rad24                         | 1.88398e-16 | 0.999999 | 1.88398e-16 | 0.999999 |
| rad54                         | 1.82956e-16 | 0.999999 | 1.82956e-16 | 0.999999 |
| rad58                         | 4.88822e-17 | 0.999999 | 4.88822e-17 | 0.999999 |
| rad31                         | 3.26769e-17 | 0.999999 | 3.26769e-17 | 0.999999 |
| PAH1+H                        | 2.18754e-17 | 0.999999 | 2.18754e-17 | 0.999999 |
| rad52                         | 1.02406e-17 | 0.999999 | 1.02406e-17 | 0.999999 |
| rad34                         | 4.79800e-18 | 0.999999 | 4.79800e-18 | 0.999999 |
| rad51                         | 3.41042e-18 | 0.999999 | 3.41042e-18 | 0.999999 |
| rad55                         | 1.88984e-18 | 0.999999 | 1.88984e-18 | 0.999999 |
| rad41                         | 1.81282e-18 | 0.999999 | 1.81282e-18 | 0.999999 |
| rad42                         | 9.02607e-19 | 0.999999 | 9.02607e-19 | 0.999999 |
| rad65                         | 6.58300e-20 | 0.999999 | 6.58300e-20 | 0.999999 |
| rad53                         | 1.21532e-22 | 0.999999 | 1.21532e-22 | 0.999999 |
| rad61                         | 8.61489e-23 | 0.999999 | 8.61489e-23 | 0.999999 |
| rad64                         | 3.46701e-24 | 0.999999 | 3.46701e-24 | 0.999999 |
| rad47                         | 3.21860e-24 | 0.999999 | 3.21860e-24 | 0.999999 |
| rad68syn                      | 5.29450e-25 | 0.999999 | 5.29450e-25 | 0.999999 |
| rad68anti                     | 4.11905e-25 | 0.999999 | 4.11905e-25 | 0.999999 |
| rad56                         | 2.01855e-25 | 0.999999 | 2.01855e-25 | 0.999999 |
| rad40syn                      | 4.15791e-27 | 0.999999 | 4.15791e-27 | 0.999999 |
| rad40anti                     | 3.52473e-27 | 0.999999 | 3.52473e-27 | 0.999999 |

|          |             |          |             |          |
|----------|-------------|----------|-------------|----------|
| PAH8+H   | 2.11757e-28 | 0.999999 | 2.11757e-28 | 0.999999 |
| rad73    | 5.46324e-29 | 0.999999 | 5.46324e-29 | 0.999999 |
| rad71    | 9.96526e-32 | 0.999999 | 9.96526e-32 | 0.999999 |
| rad19syn | 2.57870e-32 | 0.999999 | 2.57870e-32 | 0.999999 |
| rad8     | 8.00416e-48 | 0.999999 | 8.00416e-48 | 0.999999 |

1000.00000 Pa, 190.000000 K

| Rate constant             | True (fraction)        | Effective (fraction)   |
|---------------------------|------------------------|------------------------|
| Total                     | 1.32132e-14 (1.00 )    | 1.32132e-14 (1.00 )    |
| Formation of rad19        | 1.32126e-14 (1.000 )   | 1.32126e-14 (1.000 )   |
| H-abstraction to cyc2enyl | 5.62053e-19 (4.25e-05) | 5.62053e-19 (4.25e-05) |
| H-abstraction to cyclenyl | 8.18073e-23 (6.19e-09) | 8.18073e-23 (6.19e-09) |

| species                       | PYtrue      | Cumul    | PYeffective | Cumul    |
|-------------------------------|-------------|----------|-------------|----------|
| rad9                          | 0.736389    | 0.736389 | 0.736389    | 0.736389 |
| Indene+H                      | 0.262402    | 0.998791 | 0.262402    | 0.998791 |
| rad15                         | 0.00111465  | 0.999905 | 0.00111465  | 0.999905 |
| PhCHCCH2+H                    | 4.73210e-05 | 0.999952 | 4.73210e-05 | 0.999952 |
| Benzene+cycloprop-2-enylidene | 4.25373e-05 | 0.999995 | 4.25373e-05 | 0.999995 |
| rad6                          | 2.29605e-06 | 0.999997 | 2.29605e-06 | 0.999997 |
| rad2                          | 1.17398e-06 | 0.999998 | 1.17398e-06 | 0.999998 |
| rad26                         | 2.72707e-07 | 0.999999 | 2.72707e-07 | 0.999999 |
| C2H2+PhCH2                    | 2.34393e-07 | 0.999999 | 2.34393e-07 | 0.999999 |
| PhCCH+CH3                     | 1.78023e-07 | 0.999999 | 1.78023e-07 | 0.999999 |
| rad10                         | 1.39232e-07 | 0.999999 | 1.39232e-07 | 0.999999 |
| PhCCCH3+H                     | 1.27079e-07 | 0.999999 | 1.27079e-07 | 0.999999 |
| rad23                         | 1.11837e-07 | 1.000000 | 1.11837e-07 | 1.000000 |
| rad67                         | 1.09478e-07 | 1.000000 | 1.09478e-07 | 1.000000 |
| Ph+MeAc                       | 9.25931e-08 | 1.000000 | 9.25931e-08 | 1.000000 |
| rad1                          | 7.90435e-08 | 1.000000 | 7.90435e-08 | 1.000000 |
| rad35                         | 4.79625e-08 | 1.000000 | 4.79625e-08 | 1.000000 |
| rad3                          | 1.57418e-08 | 1.000000 | 1.57418e-08 | 1.000000 |
| rad45                         | 1.52462e-08 | 1.000000 | 1.52462e-08 | 1.000000 |
| rad4                          | 8.08143e-09 | 1.000000 | 8.08143e-09 | 1.000000 |
| Benzene+cycloprop-1-enylidene | 6.19133e-09 | 1.000000 | 6.19133e-09 | 1.000000 |
| rad12                         | 5.52222e-09 | 1.000000 | 5.52222e-09 | 1.000000 |
| Ph+Allene                     | 3.22343e-09 | 1.000000 | 3.22343e-09 | 1.000000 |
| rad19anti                     | 3.20404e-09 | 1.000000 | 3.20404e-09 | 1.000000 |
| rad11                         | 1.54538e-09 | 1.000000 | 1.54538e-09 | 1.000000 |
| rad7                          | 1.44759e-09 | 1.000000 | 1.44759e-09 | 1.000000 |
| rad36                         | 9.44301e-10 | 1.000000 | 9.44301e-10 | 1.000000 |
| rad30                         | 8.41718e-10 | 1.000000 | 8.41718e-10 | 1.000000 |
| rad22                         | 7.28575e-10 | 1.000000 | 7.28575e-10 | 1.000000 |
| PhCH2CCH+H                    | 6.47739e-10 | 1.000000 | 6.47739e-10 | 1.000000 |
| rad28                         | 2.99569e-10 | 1.000000 | 2.99569e-10 | 1.000000 |
| rad37                         | 1.05329e-10 | 1.000000 | 1.05329e-10 | 1.000000 |
| rad5                          | 3.76412e-11 | 1.000000 | 3.76412e-11 | 1.000000 |
| PhcycC3H3_A+H                 | 1.30353e-11 | 1.000000 | 1.30353e-11 | 1.000000 |
| PAH9+H                        | 7.50089e-12 | 1.000000 | 7.50089e-12 | 1.000000 |
| rad13                         | 6.03130e-12 | 1.000000 | 6.03130e-12 | 1.000000 |
| rad60syn                      | 4.16346e-12 | 1.000000 | 4.16346e-12 | 1.000000 |
| rad14                         | 3.86767e-12 | 1.000000 | 3.86767e-12 | 1.000000 |
| rad27                         | 3.47203e-12 | 1.000000 | 3.47203e-12 | 1.000000 |
| rad38                         | 3.45055e-12 | 1.000000 | 3.45055e-12 | 1.000000 |
| PAH7+H                        | 3.41986e-12 | 1.000000 | 3.41986e-12 | 1.000000 |
| PAH3+H                        | 2.06243e-12 | 1.000000 | 2.06243e-12 | 1.000000 |
| rad60anti                     | 2.06102e-12 | 1.000000 | 2.06102e-12 | 1.000000 |
| rad18                         | 7.41458e-13 | 1.000000 | 7.41458e-13 | 1.000000 |
| rad59                         | 4.12122e-13 | 1.000000 | 4.12122e-13 | 1.000000 |
| rad39                         | 2.88981e-13 | 1.000000 | 2.88981e-13 | 1.000000 |
| PAH10+CH3                     | 2.18183e-13 | 1.000000 | 2.18183e-13 | 1.000000 |
| rad46                         | 2.15012e-13 | 1.000000 | 2.15012e-13 | 1.000000 |
| Phenyl+cycC3H4                | 1.24602e-13 | 1.000000 | 0.00000     | 1.000000 |
| PhcycC3H3_B+H                 | 5.00277e-14 | 1.000000 | 5.00277e-14 | 1.000000 |
| rad20                         | 4.48233e-14 | 1.000000 | 4.48233e-14 | 1.000000 |
| rad21                         | 2.88311e-14 | 1.000000 | 2.88311e-14 | 1.000000 |
| rad43                         | 2.50122e-14 | 1.000000 | 2.50122e-14 | 1.000000 |
| rad25                         | 2.41677e-14 | 1.000000 | 2.41677e-14 | 1.000000 |
| rad33                         | 7.28813e-15 | 1.000000 | 7.28813e-15 | 1.000000 |
| rad62                         | 4.10809e-15 | 1.000000 | 4.10809e-15 | 1.000000 |
| rad50                         | 1.76351e-15 | 1.000000 | 1.76351e-15 | 1.000000 |
| rad70                         | 3.35115e-16 | 1.000000 | 3.35115e-16 | 1.000000 |
| rad54                         | 2.76315e-16 | 1.000000 | 2.76315e-16 | 1.000000 |
| rad24                         | 1.95703e-16 | 1.000000 | 1.95703e-16 | 1.000000 |
| rad58                         | 6.72273e-17 | 1.000000 | 6.72273e-17 | 1.000000 |
| PAH1+H                        | 3.73452e-17 | 1.000000 | 3.73452e-17 | 1.000000 |
| rad31                         | 3.71785e-17 | 1.000000 | 3.71785e-17 | 1.000000 |

|           |             |          |             |          |
|-----------|-------------|----------|-------------|----------|
| rad52     | 1.44541e-17 | 1.000000 | 1.44541e-17 | 1.000000 |
| rad34     | 7.15080e-18 | 1.000000 | 7.15080e-18 | 1.000000 |
| rad51     | 5.07608e-18 | 1.000000 | 5.07608e-18 | 1.000000 |
| rad41     | 3.13338e-18 | 1.000000 | 3.13338e-18 | 1.000000 |
| rad55     | 3.04819e-18 | 1.000000 | 3.04819e-18 | 1.000000 |
| rad42     | 1.52454e-18 | 1.000000 | 1.52454e-18 | 1.000000 |
| rad65     | 1.02101e-19 | 1.000000 | 1.02101e-19 | 1.000000 |
| rad53     | 2.92333e-22 | 1.000000 | 2.92333e-22 | 1.000000 |
| rad61     | 2.81487e-22 | 1.000000 | 2.81487e-22 | 1.000000 |
| rad64     | 1.07110e-23 | 1.000000 | 1.07110e-23 | 1.000000 |
| rad47     | 3.72465e-24 | 1.000000 | 3.72465e-24 | 1.000000 |
| rad68syn  | 1.84412e-24 | 1.000000 | 1.84412e-24 | 1.000000 |
| rad68anti | 1.42422e-24 | 1.000000 | 1.42422e-24 | 1.000000 |
| rad56     | 7.63211e-25 | 1.000000 | 7.63211e-25 | 1.000000 |
| rad40syn  | 2.17419e-26 | 1.000000 | 2.17419e-26 | 1.000000 |
| rad40anti | 1.85679e-26 | 1.000000 | 1.85679e-26 | 1.000000 |
| PAH8+H    | 1.45549e-27 | 1.000000 | 1.45549e-27 | 1.000000 |
| rad73     | 2.84415e-28 | 1.000000 | 2.84415e-28 | 1.000000 |
| rad71     | 7.92788e-31 | 1.000000 | 7.92788e-31 | 1.000000 |
| rad19syn  | 7.85071e-32 | 1.000000 | 7.85071e-32 | 1.000000 |
| rad8      | 1.09754e-47 | 1.000000 | 1.09754e-47 | 1.000000 |

1000.00000 Pa, 200.000000 K

| Rate constant             | True (fraction)        | Effective (fraction)   |  |  |
|---------------------------|------------------------|------------------------|--|--|
| Total                     | 1.52621e-14 (1.00 )    | 1.52621e-14 (1.00 )    |  |  |
| Formation of rad19        | 1.52610e-14 (1.000 )   | 1.52610e-14 (1.000 )   |  |  |
| H-abstraction to cyc2enyl | 1.06427e-18 (6.97e-05) | 1.06427e-18 (6.97e-05) |  |  |
| H-abstraction to cyclenyl | 2.46309e-22 (1.61e-08) | 2.46309e-22 (1.61e-08) |  |  |

  

| species                       | PYtrue      | Cumul    | PYeffective | Cumul    |
|-------------------------------|-------------|----------|-------------|----------|
| rad9                          | 0.719977    | 0.719977 | 0.719977    | 0.719977 |
| Indene+H                      | 0.278814    | 0.998790 | 0.278814    | 0.998790 |
| rad15                         | 0.00108184  | 0.999872 | 0.00108184  | 0.999872 |
| Benzene+cycloprop-2-enylidene | 6.97330e-05 | 0.999942 | 6.97330e-05 | 0.999942 |
| PhCHCCH2+H                    | 5.29646e-05 | 0.999995 | 5.29646e-05 | 0.999995 |
| rad6                          | 2.58403e-06 | 0.999997 | 2.58403e-06 | 0.999997 |
| rad2                          | 1.26379e-06 | 0.999999 | 1.26379e-06 | 0.999999 |
| rad26                         | 3.03550e-07 | 0.999999 | 3.03550e-07 | 0.999999 |
| C2H2+PhCH2                    | 2.67297e-07 | 0.999999 | 2.67297e-07 | 0.999999 |
| PhCCH+CH3                     | 2.19115e-07 | 1.000000 | 2.19115e-07 | 1.000000 |
| PhCCCH3+H                     | 1.57100e-07 | 1.000000 | 1.57100e-07 | 1.000000 |
| rad10                         | 1.49893e-07 | 1.000000 | 1.49893e-07 | 1.000000 |
| rad67                         | 1.24972e-07 | 1.000000 | 1.24972e-07 | 1.000000 |
| rad23                         | 1.18223e-07 | 1.000000 | 1.18223e-07 | 1.000000 |
| Ph+MeAc                       | 1.16500e-07 | 1.000000 | 1.16500e-07 | 1.000000 |
| rad1                          | 8.57377e-08 | 1.000000 | 8.57377e-08 | 1.000000 |
| rad35                         | 5.45909e-08 | 1.000000 | 5.45909e-08 | 1.000000 |
| rad3                          | 1.69081e-08 | 1.000000 | 1.69081e-08 | 1.000000 |
| Benzene+cycloprop-1-enylidene | 1.61386e-08 | 1.000000 | 1.61386e-08 | 1.000000 |
| rad45                         | 1.59152e-08 | 1.000000 | 1.59152e-08 | 1.000000 |
| rad4                          | 8.69803e-09 | 1.000000 | 8.69803e-09 | 1.000000 |
| rad12                         | 5.39511e-09 | 1.000000 | 5.39511e-09 | 1.000000 |
| Ph+Allene                     | 3.86067e-09 | 1.000000 | 3.86067e-09 | 1.000000 |
| rad19anti                     | 3.11227e-09 | 1.000000 | 3.11227e-09 | 1.000000 |
| rad7                          | 1.61099e-09 | 1.000000 | 1.61099e-09 | 1.000000 |
| rad11                         | 1.55141e-09 | 1.000000 | 1.55141e-09 | 1.000000 |
| rad36                         | 9.88513e-10 | 1.000000 | 9.88513e-10 | 1.000000 |
| rad30                         | 9.59946e-10 | 1.000000 | 9.59946e-10 | 1.000000 |
| PhCH2CCH+H                    | 7.91392e-10 | 1.000000 | 7.91392e-10 | 1.000000 |
| rad22                         | 7.01400e-10 | 1.000000 | 7.01400e-10 | 1.000000 |
| rad28                         | 3.80527e-10 | 1.000000 | 3.80527e-10 | 1.000000 |
| rad37                         | 1.38548e-10 | 1.000000 | 1.38548e-10 | 1.000000 |
| rad5                          | 3.70716e-11 | 1.000000 | 3.70716e-11 | 1.000000 |
| PhcycC3H3_A+H                 | 1.71706e-11 | 1.000000 | 1.71706e-11 | 1.000000 |
| PAH9+H                        | 9.41688e-12 | 1.000000 | 9.41688e-12 | 1.000000 |
| rad13                         | 6.67330e-12 | 1.000000 | 6.67330e-12 | 1.000000 |
| rad60syn                      | 4.89021e-12 | 1.000000 | 4.89021e-12 | 1.000000 |
| PAH7+H                        | 4.52178e-12 | 1.000000 | 4.52178e-12 | 1.000000 |
| rad38                         | 4.35844e-12 | 1.000000 | 4.35844e-12 | 1.000000 |
| rad14                         | 4.11411e-12 | 1.000000 | 4.11411e-12 | 1.000000 |
| rad27                         | 3.68619e-12 | 1.000000 | 3.68619e-12 | 1.000000 |
| PAH3+H                        | 2.51513e-12 | 1.000000 | 2.51513e-12 | 1.000000 |
| rad60anti                     | 2.42718e-12 | 1.000000 | 2.42718e-12 | 1.000000 |
| rad18                         | 6.69169e-13 | 1.000000 | 6.69169e-13 | 1.000000 |
| rad59                         | 4.99570e-13 | 1.000000 | 4.99570e-13 | 1.000000 |
| rad39                         | 4.45039e-13 | 1.000000 | 4.45039e-13 | 1.000000 |
| PAH10+CH3                     | 3.24611e-13 | 1.000000 | 3.24611e-13 | 1.000000 |

|                |             |         |             |         |
|----------------|-------------|---------|-------------|---------|
| rad46          | 2.73094e-13 | 1.00000 | 2.73094e-13 | 1.00000 |
| Phenyl+cycC3H4 | 1.83625e-13 | 1.00000 | 0.00000     | 1.00000 |
| PhcycC3H3_B+H  | 8.72545e-14 | 1.00000 | 8.72545e-14 | 1.00000 |
| rad20          | 4.23450e-14 | 1.00000 | 4.23450e-14 | 1.00000 |
| rad43          | 3.51864e-14 | 1.00000 | 3.51864e-14 | 1.00000 |
| rad21          | 2.72242e-14 | 1.00000 | 2.72242e-14 | 1.00000 |
| rad25          | 2.37801e-14 | 1.00000 | 2.37801e-14 | 1.00000 |
| rad33          | 8.06702e-15 | 1.00000 | 8.06702e-15 | 1.00000 |
| rad62          | 5.82866e-15 | 1.00000 | 5.82866e-15 | 1.00000 |
| rad50          | 2.39355e-15 | 1.00000 | 2.39355e-15 | 1.00000 |
| rad70          | 4.66917e-16 | 1.00000 | 4.66917e-16 | 1.00000 |
| rad54          | 4.22094e-16 | 1.00000 | 4.22094e-16 | 1.00000 |
| rad24          | 2.03195e-16 | 1.00000 | 2.03195e-16 | 1.00000 |
| rad58          | 9.33301e-17 | 1.00000 | 9.33301e-17 | 1.00000 |
| PAH1+H         | 6.41972e-17 | 1.00000 | 6.41972e-17 | 1.00000 |
| rad31          | 4.23641e-17 | 1.00000 | 4.23641e-17 | 1.00000 |
| rad52          | 2.05867e-17 | 1.00000 | 2.05867e-17 | 1.00000 |
| rad34          | 1.07532e-17 | 1.00000 | 1.07532e-17 | 1.00000 |
| rad51          | 7.63569e-18 | 1.00000 | 7.63569e-18 | 1.00000 |
| rad41          | 5.40243e-18 | 1.00000 | 5.40243e-18 | 1.00000 |
| rad55          | 4.97511e-18 | 1.00000 | 4.97511e-18 | 1.00000 |
| rad42          | 2.56489e-18 | 1.00000 | 2.56489e-18 | 1.00000 |
| rad65          | 1.59746e-19 | 1.00000 | 1.59746e-19 | 1.00000 |
| rad61          | 8.62012e-22 | 1.00000 | 8.62012e-22 | 1.00000 |
| rad53          | 6.91417e-22 | 1.00000 | 6.91417e-22 | 1.00000 |
| rad64          | 3.20452e-23 | 1.00000 | 3.20452e-23 | 1.00000 |
| rad68syn       | 5.90350e-24 | 1.00000 | 5.90350e-24 | 1.00000 |
| rad68anti      | 4.52528e-24 | 1.00000 | 4.52528e-24 | 1.00000 |
| rad47          | 4.33635e-24 | 1.00000 | 4.33635e-24 | 1.00000 |
| rad56          | 2.68291e-24 | 1.00000 | 2.68291e-24 | 1.00000 |
| rad40syn       | 9.95731e-26 | 1.00000 | 9.95731e-26 | 1.00000 |
| rad40anti      | 8.55728e-26 | 1.00000 | 8.55728e-26 | 1.00000 |
| PAH8+H         | 8.49629e-27 | 1.00000 | 8.49629e-27 | 1.00000 |
| rad73          | 1.31740e-27 | 1.00000 | 1.31740e-27 | 1.00000 |
| rad71          | 5.29301e-30 | 1.00000 | 5.29301e-30 | 1.00000 |
| rad19syn       | 2.51555e-31 | 1.00000 | 2.51555e-31 | 1.00000 |
| rad8           | 1.54049e-47 | 1.00000 | 1.54049e-47 | 1.00000 |

1000.00000 Pa, 210.000000 K

=====

| Rate constant             | True (fraction)        | Effective (fraction)   |
|---------------------------|------------------------|------------------------|
| Total                     | 1.74272e-14 (1.00 )    | 1.74272e-14 (1.00 )    |
| Formation of rad19        | 1.74253e-14 (1.000 )   | 1.74253e-14 (1.000 )   |
| H-abstraction to cyc2enyl | 1.89310e-18 (0.000109) | 1.89310e-18 (0.000109) |
| H-abstraction to cyclenyl | 6.66714e-22 (3.83e-08) | 6.66714e-22 (3.83e-08) |

| species                       | PYtrue      | Cumul    | PYeffective | Cumul    |
|-------------------------------|-------------|----------|-------------|----------|
| rad9                          | 0.703043    | 0.703043 | 0.703043    | 0.703043 |
| Indene+H                      | 0.295735    | 0.998777 | 0.295735    | 0.998777 |
| rad15                         | 0.00104914  | 0.999827 | 0.00104914  | 0.999827 |
| Benzene+cycloprop-2-enylidene | 0.000108629 | 0.999935 | 0.000108629 | 0.999935 |
| PhCHCCH2+H                    | 5.93408e-05 | 0.999995 | 5.93408e-05 | 0.999995 |
| rad6                          | 2.91078e-06 | 0.999997 | 2.91078e-06 | 0.999997 |
| rad2                          | 1.35576e-06 | 0.999999 | 1.35576e-06 | 0.999999 |
| rad26                         | 3.37656e-07 | 0.999999 | 3.37656e-07 | 0.999999 |
| C2H2+PhCH2                    | 3.05447e-07 | 0.999999 | 3.05447e-07 | 0.999999 |
| PhCCH+CH3                     | 2.69110e-07 | 1.000000 | 2.69110e-07 | 1.000000 |
| PhCCCH3+H                     | 1.94035e-07 | 1.000000 | 1.94035e-07 | 1.000000 |
| rad10                         | 1.60773e-07 | 1.000000 | 1.60773e-07 | 1.000000 |
| Ph+MeAc                       | 1.46540e-07 | 1.000000 | 1.46540e-07 | 1.000000 |
| rad67                         | 1.42931e-07 | 1.000000 | 1.42931e-07 | 1.000000 |
| rad23                         | 1.24624e-07 | 1.000000 | 1.24624e-07 | 1.000000 |
| rad1                          | 9.27382e-08 | 1.000000 | 9.27382e-08 | 1.000000 |
| rad35                         | 6.22460e-08 | 1.000000 | 6.22460e-08 | 1.000000 |
| Benzene+cycloprop-1-enylidene | 3.82571e-08 | 1.000000 | 3.82571e-08 | 1.000000 |
| rad3                          | 1.80988e-08 | 1.000000 | 1.80988e-08 | 1.000000 |
| rad45                         | 1.65826e-08 | 1.000000 | 1.65826e-08 | 1.000000 |
| rad4                          | 9.33156e-09 | 1.000000 | 9.33156e-09 | 1.000000 |
| rad12                         | 5.27166e-09 | 1.000000 | 5.27166e-09 | 1.000000 |
| Ph+Allene                     | 4.64573e-09 | 1.000000 | 4.64573e-09 | 1.000000 |
| rad19anti                     | 3.02887e-09 | 1.000000 | 3.02887e-09 | 1.000000 |
| rad7                          | 1.79566e-09 | 1.000000 | 1.79566e-09 | 1.000000 |
| rad11                         | 1.57640e-09 | 1.000000 | 1.57640e-09 | 1.000000 |
| rad30                         | 1.09700e-09 | 1.000000 | 1.09700e-09 | 1.000000 |
| rad36                         | 1.03330e-09 | 1.000000 | 1.03330e-09 | 1.000000 |
| PhCH2CCH+H                    | 9.72213e-10 | 1.000000 | 9.72213e-10 | 1.000000 |
| rad22                         | 6.79304e-10 | 1.000000 | 6.79304e-10 | 1.000000 |
| rad28                         | 4.84205e-10 | 1.000000 | 4.84205e-10 | 1.000000 |

|                |             |         |             |         |
|----------------|-------------|---------|-------------|---------|
| rad37          | 1.82999e-10 | 1.00000 | 1.82999e-10 | 1.00000 |
| rad5           | 3.63781e-11 | 1.00000 | 3.63781e-11 | 1.00000 |
| PhcycC3H3_A+H  | 2.27208e-11 | 1.00000 | 2.27208e-11 | 1.00000 |
| PAH9+H         | 1.18430e-11 | 1.00000 | 1.18430e-11 | 1.00000 |
| rad13          | 7.39877e-12 | 1.00000 | 7.39877e-12 | 1.00000 |
| PAH7+H         | 6.08829e-12 | 1.00000 | 6.08829e-12 | 1.00000 |
| rad60syn       | 5.76493e-12 | 1.00000 | 5.76493e-12 | 1.00000 |
| rad38          | 5.53115e-12 | 1.00000 | 5.53115e-12 | 1.00000 |
| rad14          | 4.36439e-12 | 1.00000 | 4.36439e-12 | 1.00000 |
| rad27          | 3.90394e-12 | 1.00000 | 3.90394e-12 | 1.00000 |
| PAH3+H         | 3.08459e-12 | 1.00000 | 3.08459e-12 | 1.00000 |
| rad60anti      | 2.86931e-12 | 1.00000 | 2.86931e-12 | 1.00000 |
| rad39          | 6.90481e-13 | 1.00000 | 6.90481e-13 | 1.00000 |
| rad18          | 6.09647e-13 | 1.00000 | 6.09647e-13 | 1.00000 |
| rad59          | 6.08781e-13 | 1.00000 | 6.08781e-13 | 1.00000 |
| PAH10+CH3      | 4.86848e-13 | 1.00000 | 4.86848e-13 | 1.00000 |
| rad46          | 3.48186e-13 | 1.00000 | 3.48186e-13 | 1.00000 |
| Phenyl+cycC3H4 | 2.70226e-13 | 1.00000 | 0.00000     | 1.00000 |
| PhcycC3H3_B+H  | 1.49007e-13 | 1.00000 | 1.49007e-13 | 1.00000 |
| rad43          | 4.96214e-14 | 1.00000 | 4.96214e-14 | 1.00000 |
| rad20          | 4.05865e-14 | 1.00000 | 4.05865e-14 | 1.00000 |
| rad21          | 2.60827e-14 | 1.00000 | 2.60827e-14 | 1.00000 |
| rad25          | 2.36884e-14 | 1.00000 | 2.36884e-14 | 1.00000 |
| rad33          | 8.94930e-15 | 1.00000 | 8.94930e-15 | 1.00000 |
| rad62          | 8.27366e-15 | 1.00000 | 8.27366e-15 | 1.00000 |
| rad50          | 3.27187e-15 | 1.00000 | 3.27187e-15 | 1.00000 |
| rad70          | 6.56377e-16 | 1.00000 | 6.56377e-16 | 1.00000 |
| rad54          | 6.51834e-16 | 1.00000 | 6.51834e-16 | 1.00000 |
| rad24          | 2.10849e-16 | 1.00000 | 2.10849e-16 | 1.00000 |
| rad58          | 1.30704e-16 | 1.00000 | 1.30704e-16 | 1.00000 |
| PAH1+H         | 1.10844e-16 | 1.00000 | 1.10844e-16 | 1.00000 |
| rad31          | 4.83629e-17 | 1.00000 | 4.83629e-17 | 1.00000 |
| rad52          | 2.95789e-17 | 1.00000 | 2.95789e-17 | 1.00000 |
| rad34          | 1.62984e-17 | 1.00000 | 1.62984e-17 | 1.00000 |
| rad51          | 1.15985e-17 | 1.00000 | 1.15985e-17 | 1.00000 |
| rad41          | 9.27316e-18 | 1.00000 | 9.27316e-18 | 1.00000 |
| rad55          | 8.20679e-18 | 1.00000 | 8.20679e-18 | 1.00000 |
| rad42          | 4.29126e-18 | 1.00000 | 4.29126e-18 | 1.00000 |
| rad65          | 2.51869e-19 | 1.00000 | 2.51869e-19 | 1.00000 |
| rad61          | 2.49155e-21 | 1.00000 | 2.49155e-21 | 1.00000 |
| rad53          | 1.60901e-21 | 1.00000 | 1.60901e-21 | 1.00000 |
| rad64          | 9.28826e-23 | 1.00000 | 9.28826e-23 | 1.00000 |
| rad68syn       | 1.75837e-23 | 1.00000 | 1.75837e-23 | 1.00000 |
| rad68anti      | 1.33788e-23 | 1.00000 | 1.33788e-23 | 1.00000 |
| rad56          | 8.84679e-24 | 1.00000 | 8.84679e-24 | 1.00000 |
| rad47          | 5.08322e-24 | 1.00000 | 5.08322e-24 | 1.00000 |
| rad40syn       | 4.06240e-25 | 1.00000 | 4.06240e-25 | 1.00000 |
| rad40anti      | 3.50954e-25 | 1.00000 | 3.50954e-25 | 1.00000 |
| PAH8+H         | 4.29411e-26 | 1.00000 | 4.29411e-26 | 1.00000 |
| rad73          | 5.50333e-27 | 1.00000 | 5.50333e-27 | 1.00000 |
| rad71          | 3.02160e-29 | 1.00000 | 3.02160e-29 | 1.00000 |
| rad19syn       | 8.47842e-31 | 1.00000 | 8.47842e-31 | 1.00000 |
| rad8           | 2.21015e-47 | 1.00000 | 2.21015e-47 | 1.00000 |

1000.00000 Pa, 220.000000 K

| Rate constant                 | True (fraction)        | Effective (fraction)   |             |          |
|-------------------------------|------------------------|------------------------|-------------|----------|
| Total                         | 1.97009e-14 (1.00 )    | 1.97009e-14 (1.00 )    |             |          |
| Formation of rad19            | 1.96977e-14 (1.000 )   | 1.96977e-14 (1.000 )   |             |          |
| H-abstraction to cyc2enyl     | 3.19064e-18 (0.000162) | 3.19064e-18 (0.000162) |             |          |
| H-abstraction to cyclenyl     | 1.64627e-21 (8.36e-08) | 1.64627e-21 (8.36e-08) |             |          |
| species                       | PYtrue                 | Cumul                  | PYeffective | Cumul    |
| rad9                          | 0.685553               | 0.685553               | 0.685553    | 0.685553 |
| Indene+H                      | 0.313195               | 0.998748               | 0.313195    | 0.998748 |
| rad15                         | 0.00101641             | 0.999765               | 0.00101641  | 0.999765 |
| Benzene+cycloprop-2-enylidene | 0.000161954            | 0.999926               | 0.000161954 | 0.999926 |
| PhCHCCH2+H                    | 6.65648e-05            | 0.999993               | 6.65648e-05 | 0.999993 |
| rad6                          | 3.28235e-06            | 0.999996               | 3.28235e-06 | 0.999996 |
| rad2                          | 1.44914e-06            | 0.999998               | 1.44914e-06 | 0.999998 |
| rad26                         | 3.75293e-07            | 0.999998               | 3.75293e-07 | 0.999998 |
| C2H2+PhCH2                    | 3.49840e-07            | 0.999999               | 3.49840e-07 | 0.999999 |
| PhCCH+CH3                     | 3.29781e-07            | 0.999999               | 3.29781e-07 | 0.999999 |
| PhCCCH3+H                     | 2.39401e-07            | 0.999999               | 2.39401e-07 | 0.999999 |
| Ph+MeAc                       | 1.84236e-07            | 0.999999               | 1.84236e-07 | 0.999999 |
| rad10                         | 1.71787e-07            | 0.999999               | 1.71787e-07 | 0.999999 |
| rad67                         | 1.63814e-07            | 1.000000               | 1.63814e-07 | 1.000000 |
| rad23                         | 1.31004e-07            | 1.000000               | 1.31004e-07 | 1.000000 |

|                               |             |          |             |          |
|-------------------------------|-------------|----------|-------------|----------|
| rad1                          | 1.00017e-07 | 1.000000 | 1.00017e-07 | 1.000000 |
| Benzene+cycloprop-1-enylidene | 8.35632e-08 | 1.000000 | 8.35632e-08 | 1.000000 |
| rad35                         | 7.11142e-08 | 1.000000 | 7.11142e-08 | 1.000000 |
| rad3                          | 1.93042e-08 | 1.000000 | 1.93042e-08 | 1.000000 |
| rad45                         | 1.72438e-08 | 1.000000 | 1.72438e-08 | 1.000000 |
| rad4                          | 9.97749e-09 | 1.000000 | 9.97749e-09 | 1.000000 |
| Ph+Allene                     | 5.61827e-09 | 1.000000 | 5.61827e-09 | 1.000000 |
| rad12                         | 5.15088e-09 | 1.000000 | 5.15088e-09 | 1.000000 |
| rad19anti                     | 2.95309e-09 | 1.000000 | 2.95309e-09 | 1.000000 |
| rad7                          | 2.00484e-09 | 1.000000 | 2.00484e-09 | 1.000000 |
| rad11                         | 1.62047e-09 | 1.000000 | 1.62047e-09 | 1.000000 |
| rad30                         | 1.25645e-09 | 1.000000 | 1.25645e-09 | 1.000000 |
| PhCH2CCH+H                    | 1.20109e-09 | 1.000000 | 1.20109e-09 | 1.000000 |
| rad36                         | 1.07847e-09 | 1.000000 | 1.07847e-09 | 1.000000 |
| rad22                         | 6.61504e-10 | 1.000000 | 6.61504e-10 | 1.000000 |
| rad28                         | 6.17228e-10 | 1.000000 | 6.17228e-10 | 1.000000 |
| rad37                         | 2.42645e-10 | 1.000000 | 2.42645e-10 | 1.000000 |
| rad5                          | 3.55718e-11 | 1.000000 | 3.55718e-11 | 1.000000 |
| PhcycC3H3_A+H                 | 3.01764e-11 | 1.000000 | 3.01764e-11 | 1.000000 |
| PAH9+H                        | 1.49245e-11 | 1.000000 | 1.49245e-11 | 1.000000 |
| PAH7+H                        | 8.35336e-12 | 1.000000 | 8.35336e-12 | 1.000000 |
| rad13                         | 8.22016e-12 | 1.000000 | 8.22016e-12 | 1.000000 |
| rad38                         | 7.05498e-12 | 1.000000 | 7.05498e-12 | 1.000000 |
| rad60syn                      | 6.82228e-12 | 1.000000 | 6.82228e-12 | 1.000000 |
| rad14                         | 4.61627e-12 | 1.000000 | 4.61627e-12 | 1.000000 |
| rad27                         | 4.12329e-12 | 1.000000 | 4.12329e-12 | 1.000000 |
| PAH3+H                        | 3.80463e-12 | 1.000000 | 3.80463e-12 | 1.000000 |
| rad60anti                     | 3.40549e-12 | 1.000000 | 3.40549e-12 | 1.000000 |
| rad39                         | 1.07851e-12 | 1.000000 | 1.07851e-12 | 1.000000 |
| rad59                         | 7.45845e-13 | 1.000000 | 7.45845e-13 | 1.000000 |
| PAH10+CH3                     | 7.34978e-13 | 1.000000 | 7.34978e-13 | 1.000000 |
| rad18                         | 5.60659e-13 | 1.000000 | 5.60659e-13 | 1.000000 |
| rad46                         | 4.45678e-13 | 1.000000 | 4.45678e-13 | 1.000000 |
| Phenyl+cycC3H4                | 3.96955e-13 | 1.000000 | 0.000000    | 1.000000 |
| PhcycC3H3_B+H                 | 2.49797e-13 | 1.000000 | 2.49797e-13 | 1.000000 |
| rad43                         | 7.00765e-14 | 1.000000 | 7.00765e-14 | 1.000000 |
| rad20                         | 3.94444e-14 | 1.000000 | 3.94444e-14 | 1.000000 |
| rad21                         | 2.53392e-14 | 1.000000 | 2.53392e-14 | 1.000000 |
| rad25                         | 2.38808e-14 | 1.000000 | 2.38808e-14 | 1.000000 |
| rad62                         | 1.17383e-14 | 1.000000 | 1.17383e-14 | 1.000000 |
| rad33                         | 9.95072e-15 | 1.000000 | 9.95072e-15 | 1.000000 |
| rad50                         | 4.50332e-15 | 1.000000 | 4.50332e-15 | 1.000000 |
| rad54                         | 1.01668e-15 | 1.000000 | 1.01668e-15 | 1.000000 |
| rad70                         | 9.30274e-16 | 1.000000 | 9.30274e-16 | 1.000000 |
| rad24                         | 2.18626e-16 | 1.000000 | 2.18626e-16 | 1.000000 |
| PAH1+H                        | 1.91736e-16 | 1.000000 | 1.91736e-16 | 1.000000 |
| rad58                         | 1.84478e-16 | 1.000000 | 1.84478e-16 | 1.000000 |
| rad31                         | 5.53323e-17 | 1.000000 | 5.53323e-17 | 1.000000 |
| rad52                         | 4.28441e-17 | 1.000000 | 4.28441e-17 | 1.000000 |
| rad34                         | 2.48672e-17 | 1.000000 | 2.48672e-17 | 1.000000 |
| rad51                         | 1.77693e-17 | 1.000000 | 1.77693e-17 | 1.000000 |
| rad41                         | 1.58178e-17 | 1.000000 | 1.58178e-17 | 1.000000 |
| rad55                         | 1.36602e-17 | 1.000000 | 1.36602e-17 | 1.000000 |
| rad42                         | 7.12911e-18 | 1.000000 | 7.12911e-18 | 1.000000 |
| rad65                         | 3.99631e-19 | 1.000000 | 3.99631e-19 | 1.000000 |
| rad61                         | 6.83388e-21 | 1.000000 | 6.83388e-21 | 1.000000 |
| rad53                         | 3.68442e-21 | 1.000000 | 3.68442e-21 | 1.000000 |
| rad64                         | 2.60735e-22 | 1.000000 | 2.60735e-22 | 1.000000 |
| rad68syn                      | 4.92000e-23 | 1.000000 | 4.92000e-23 | 1.000000 |
| rad68anti                     | 3.71654e-23 | 1.000000 | 3.71654e-23 | 1.000000 |
| rad56                         | 2.75388e-23 | 1.000000 | 2.75388e-23 | 1.000000 |
| rad47                         | 6.00488e-24 | 1.000000 | 6.00488e-24 | 1.000000 |
| rad40syn                      | 1.49661e-24 | 1.000000 | 1.49661e-24 | 1.000000 |
| rad40anti                     | 1.29851e-24 | 1.000000 | 1.29851e-24 | 1.000000 |
| PAH8+H                        | 1.90857e-25 | 1.000000 | 1.90857e-25 | 1.000000 |
| rad73                         | 2.09474e-26 | 1.000000 | 2.09474e-26 | 1.000000 |
| rad71                         | 1.49792e-28 | 1.000000 | 1.49792e-28 | 1.000000 |
| rad19syn                      | 3.00269e-30 | 1.000000 | 3.00269e-30 | 1.000000 |
| rad8                          | 3.23747e-47 | 1.000000 | 3.23747e-47 | 1.000000 |

1000.00000 Pa, 230.000000 K

| Rate constant             | True (fraction)        | Effective (fraction)   |
|---------------------------|------------------------|------------------------|
| Total                     | 2.20761e-14 (1.00 )    | 2.20761e-14 (1.00 )    |
| Formation of rad19        | 2.20710e-14 (1.000 )   | 2.20710e-14 (1.000 )   |
| H-abstraction to cyc2enyl | 5.13155e-18 (0.000232) | 5.13155e-18 (0.000232) |
| H-abstraction to cyclenyl | 3.75316e-21 (1.70e-07) | 3.75316e-21 (1.70e-07) |
| species                   | PYtrue                 | Cumul                  |
|                           | PYeffective            | Cumul                  |

|                               |             |          |             |          |
|-------------------------------|-------------|----------|-------------|----------|
| rad9                          | 0.667485    | 0.667485 | 0.667485    | 0.667485 |
| Indene+H                      | 0.331217    | 0.998702 | 0.331217    | 0.998702 |
| rad15                         | 0.000983546 | 0.999685 | 0.000983546 | 0.999685 |
| Benzene+cycloprop-2-enylidene | 0.000232448 | 0.999918 | 0.000232448 | 0.999918 |
| PhCCH2+H                      | 7.47681e-05 | 0.999992 | 7.47681e-05 | 0.999992 |
| rad6                          | 3.70546e-06 | 0.999996 | 3.70546e-06 | 0.999996 |
| rad2                          | 1.54298e-06 | 0.999998 | 1.54298e-06 | 0.999998 |
| rad26                         | 4.16689e-07 | 0.999998 | 4.16689e-07 | 0.999998 |
| PhCCH+CH3                     | 4.03154e-07 | 0.999998 | 4.03154e-07 | 0.999998 |
| C2H2+PhCH2                    | 4.01659e-07 | 0.999999 | 4.01659e-07 | 0.999999 |
| PhCCCH3+H                     | 2.94982e-07 | 0.999999 | 2.94982e-07 | 0.999999 |
| Ph+MeAc                       | 2.31428e-07 | 0.999999 | 2.31428e-07 | 0.999999 |
| rad67                         | 1.88158e-07 | 1.000000 | 1.88158e-07 | 1.000000 |
| rad10                         | 1.82833e-07 | 1.000000 | 1.82833e-07 | 1.000000 |
| Benzene+cycloprop-1-enylidene | 1.70010e-07 | 1.000000 | 1.70010e-07 | 1.000000 |
| rad23                         | 1.37310e-07 | 1.000000 | 1.37310e-07 | 1.000000 |
| rad1                          | 1.07532e-07 | 1.000000 | 1.07532e-07 | 1.000000 |
| rad35                         | 8.14133e-08 | 1.000000 | 8.14133e-08 | 1.000000 |
| rad3                          | 2.05117e-08 | 1.000000 | 2.05117e-08 | 1.000000 |
| rad45                         | 1.78935e-08 | 1.000000 | 1.78935e-08 | 1.000000 |
| rad4                          | 1.06301e-08 | 1.000000 | 1.06301e-08 | 1.000000 |
| Ph+Allene                     | 6.82913e-09 | 1.000000 | 6.82913e-09 | 1.000000 |
| rad12                         | 5.03195e-09 | 1.000000 | 5.03195e-09 | 1.000000 |
| rad19anti                     | 2.88440e-09 | 1.000000 | 2.88440e-09 | 1.000000 |
| rad7                          | 2.24206e-09 | 1.000000 | 2.24206e-09 | 1.000000 |
| rad11                         | 1.68416e-09 | 1.000000 | 1.68416e-09 | 1.000000 |
| PhCH2CCH+H                    | 1.49216e-09 | 1.000000 | 1.49216e-09 | 1.000000 |
| rad30                         | 1.44246e-09 | 1.000000 | 1.44246e-09 | 1.000000 |
| rad36                         | 1.12379e-09 | 1.000000 | 1.12379e-09 | 1.000000 |
| rad28                         | 7.88034e-10 | 1.000000 | 7.88034e-10 | 1.000000 |
| rad22                         | 6.47355e-10 | 1.000000 | 6.47355e-10 | 1.000000 |
| rad37                         | 3.22792e-10 | 1.000000 | 3.22792e-10 | 1.000000 |
| PhcycC3H3_A+H                 | 4.01926e-11 | 1.000000 | 4.01926e-11 | 1.000000 |
| rad5                          | 3.46635e-11 | 1.000000 | 3.46635e-11 | 1.000000 |
| PAH9+H                        | 1.88473e-11 | 1.000000 | 1.88473e-11 | 1.000000 |
| PAH7+H                        | 1.16780e-11 | 1.000000 | 1.16780e-11 | 1.000000 |
| rad13                         | 9.15136e-12 | 1.000000 | 9.15136e-12 | 1.000000 |
| rad38                         | 9.04527e-12 | 1.000000 | 9.04527e-12 | 1.000000 |
| rad60syn                      | 8.10495e-12 | 1.000000 | 8.10495e-12 | 1.000000 |
| rad14                         | 4.86707e-12 | 1.000000 | 4.86707e-12 | 1.000000 |
| PAH3+H                        | 4.71904e-12 | 1.000000 | 4.71904e-12 | 1.000000 |
| rad27                         | 4.34184e-12 | 1.000000 | 4.34184e-12 | 1.000000 |
| rad60anti                     | 4.05808e-12 | 1.000000 | 4.05808e-12 | 1.000000 |
| rad39                         | 1.69398e-12 | 1.000000 | 1.69398e-12 | 1.000000 |
| PAH10+CH3                     | 1.11491e-12 | 1.000000 | 1.11491e-12 | 1.000000 |
| rad59                         | 9.18581e-13 | 1.000000 | 9.18581e-13 | 1.000000 |
| Phenyl+cycC3H4                | 5.81828e-13 | 1.000000 | 0.000000    | 1.000000 |
| rad46                         | 5.72676e-13 | 1.000000 | 5.72676e-13 | 1.000000 |
| rad18                         | 5.20513e-13 | 1.000000 | 5.20513e-13 | 1.000000 |
| PhcycC3H3_B+H                 | 4.11904e-13 | 1.000000 | 4.11904e-13 | 1.000000 |
| rad43                         | 9.89873e-14 | 1.000000 | 9.89873e-14 | 1.000000 |
| rad20                         | 3.88457e-14 | 1.000000 | 3.88457e-14 | 1.000000 |
| rad21                         | 2.49459e-14 | 1.000000 | 2.49459e-14 | 1.000000 |
| rad25                         | 2.43539e-14 | 1.000000 | 2.43539e-14 | 1.000000 |
| rad62                         | 1.66280e-14 | 1.000000 | 1.66280e-14 | 1.000000 |
| rad33                         | 1.10889e-14 | 1.000000 | 1.10889e-14 | 1.000000 |
| rad50                         | 6.23770e-15 | 1.000000 | 6.23770e-15 | 1.000000 |
| rad54                         | 1.59950e-15 | 1.000000 | 1.59950e-15 | 1.000000 |
| rad70                         | 1.32803e-15 | 1.000000 | 1.32803e-15 | 1.000000 |
| PAH1+H                        | 3.31423e-16 | 1.000000 | 3.31423e-16 | 1.000000 |
| rad58                         | 2.62130e-16 | 1.000000 | 2.62130e-16 | 1.000000 |
| rad24                         | 2.26476e-16 | 1.000000 | 2.26476e-16 | 1.000000 |
| rad31                         | 6.34661e-17 | 1.000000 | 6.34661e-17 | 1.000000 |
| rad52                         | 6.25021e-17 | 1.000000 | 6.25021e-17 | 1.000000 |
| rad34                         | 3.81410e-17 | 1.000000 | 3.81410e-17 | 1.000000 |
| rad51                         | 2.74165e-17 | 1.000000 | 2.74165e-17 | 1.000000 |
| rad41                         | 2.67717e-17 | 1.000000 | 2.67717e-17 | 1.000000 |
| rad55                         | 2.29008e-17 | 1.000000 | 2.29008e-17 | 1.000000 |
| rad42                         | 1.17450e-17 | 1.000000 | 1.17450e-17 | 1.000000 |
| rad65                         | 6.37087e-19 | 1.000000 | 6.37087e-19 | 1.000000 |
| rad61                         | 1.78585e-20 | 1.000000 | 1.78585e-20 | 1.000000 |
| rad53                         | 8.29834e-21 | 1.000000 | 8.29834e-21 | 1.000000 |
| rad64                         | 7.08093e-22 | 1.000000 | 7.08093e-22 | 1.000000 |
| rad68syn                      | 1.30271e-22 | 1.000000 | 1.30271e-22 | 1.000000 |
| rad68anti                     | 9.77341e-23 | 1.000000 | 9.77341e-23 | 1.000000 |
| rad56                         | 8.12631e-23 | 1.000000 | 8.12631e-23 | 1.000000 |
| rad47                         | 7.15525e-24 | 1.000000 | 7.15525e-24 | 1.000000 |
| rad40syn                      | 5.03240e-24 | 1.000000 | 5.03240e-24 | 1.000000 |
| rad40anti                     | 4.38162e-24 | 1.000000 | 4.38162e-24 | 1.000000 |

|          |             |         |             |         |
|----------|-------------|---------|-------------|---------|
| PAH8+H   | 7.55556e-25 | 1.00000 | 7.55556e-25 | 1.00000 |
| rad73    | 7.32059e-26 | 1.00000 | 7.32059e-26 | 1.00000 |
| rad71    | 6.53399e-28 | 1.00000 | 6.53399e-28 | 1.00000 |
| rad19syn | 1.11579e-29 | 1.00000 | 1.11579e-29 | 1.00000 |
| rad8     | 4.83723e-47 | 1.00000 | 4.83723e-47 | 1.00000 |

1000.00000 Pa, 240.000000 K

| Rate constant             | True (fraction)        | Effective (fraction)   |
|---------------------------|------------------------|------------------------|
| Total                     | 2.45462e-14 (1.00 )    | 2.45462e-14 (1.00 )    |
| Formation of rad19        | 2.45383e-14 (1.000 )   | 2.45383e-14 (1.000 )   |
| H-abstraction to cyc2enyl | 7.92234e-18 (0.000323) | 7.92234e-18 (0.000323) |
| H-abstraction to cyclenyl | 7.97958e-21 (3.25e-07) | 7.97958e-21 (3.25e-07) |

| species                       | PYtrue      | Cumul    | PYeffective | Cumul    |
|-------------------------------|-------------|----------|-------------|----------|
| rad9                          | 0.648820    | 0.648820 | 0.648820    | 0.648820 |
| Indene+H                      | 0.349813    | 0.998633 | 0.349813    | 0.998633 |
| rad15                         | 0.000950490 | 0.999584 | 0.000950490 | 0.999584 |
| Benzene+cycloprop-2-enylidene | 0.000322752 | 0.999907 | 0.000322752 | 0.999907 |
| PhCHCCH2+H                    | 8.40986e-05 | 0.999991 | 8.40986e-05 | 0.999991 |
| rad6                          | 4.18765e-06 | 0.999995 | 4.18765e-06 | 0.999995 |
| rad2                          | 1.63619e-06 | 0.999996 | 1.63619e-06 | 0.999996 |
| PhCCH+CH3                     | 4.91523e-07 | 0.999997 | 4.91523e-07 | 0.999997 |
| C2H2+PhCH2                    | 4.62294e-07 | 0.999997 | 4.62294e-07 | 0.999997 |
| rad26                         | 4.62006e-07 | 0.999998 | 4.62006e-07 | 0.999998 |
| PhCCCH3+H                     | 3.62856e-07 | 0.999998 | 3.62856e-07 | 0.999998 |
| Benzene+cycloprop-1-enylidene | 3.25084e-07 | 0.999999 | 3.25084e-07 | 0.999999 |
| Ph+MeAc                       | 2.90324e-07 | 0.999999 | 2.90324e-07 | 0.999999 |
| rad67                         | 2.16588e-07 | 0.999999 | 2.16588e-07 | 0.999999 |
| rad10                         | 1.93787e-07 | 0.999999 | 1.93787e-07 | 0.999999 |
| rad23                         | 1.43487e-07 | 0.999999 | 1.43487e-07 | 0.999999 |
| rad1                          | 1.15232e-07 | 0.999999 | 1.15232e-07 | 0.999999 |
| rad35                         | 9.33961e-08 | 1.000000 | 9.33961e-08 | 1.000000 |
| rad3                          | 2.17073e-08 | 1.000000 | 2.17073e-08 | 1.000000 |
| rad45                         | 1.85256e-08 | 1.000000 | 1.85256e-08 | 1.000000 |
| rad4                          | 1.12827e-08 | 1.000000 | 1.12827e-08 | 1.000000 |
| Ph+Allene                     | 8.34339e-09 | 1.000000 | 8.34339e-09 | 1.000000 |
| rad12                         | 4.91421e-09 | 1.000000 | 4.91421e-09 | 1.000000 |
| rad19anti                     | 2.82237e-09 | 1.000000 | 2.82237e-09 | 1.000000 |
| rad7                          | 2.51130e-09 | 1.000000 | 2.51130e-09 | 1.000000 |
| PhCH2CCH+H                    | 1.86389e-09 | 1.000000 | 1.86389e-09 | 1.000000 |
| rad11                         | 1.76844e-09 | 1.000000 | 1.76844e-09 | 1.000000 |
| rad30                         | 1.65996e-09 | 1.000000 | 1.65996e-09 | 1.000000 |
| rad36                         | 1.16896e-09 | 1.000000 | 1.16896e-09 | 1.000000 |
| rad28                         | 1.00728e-09 | 1.000000 | 1.00728e-09 | 1.000000 |
| rad22                         | 6.36322e-10 | 1.000000 | 6.36322e-10 | 1.000000 |
| rad37                         | 4.30484e-10 | 1.000000 | 4.30484e-10 | 1.000000 |
| PhcycC3H3_A+H                 | 5.36418e-11 | 1.000000 | 5.36418e-11 | 1.000000 |
| rad5                          | 3.36644e-11 | 1.000000 | 3.36644e-11 | 1.000000 |
| PAH9+H                        | 2.38494e-11 | 1.000000 | 2.38494e-11 | 1.000000 |
| PAH7+H                        | 1.66189e-11 | 1.000000 | 1.66189e-11 | 1.000000 |
| rad38                         | 1.16559e-11 | 1.000000 | 1.16559e-11 | 1.000000 |
| rad13                         | 1.02077e-11 | 1.000000 | 1.02077e-11 | 1.000000 |
| rad60syn                      | 9.66548e-12 | 1.000000 | 9.66548e-12 | 1.000000 |
| PAH3+H                        | 5.88439e-12 | 1.000000 | 5.88439e-12 | 1.000000 |
| rad14                         | 5.11367e-12 | 1.000000 | 5.11367e-12 | 1.000000 |
| rad60anti                     | 4.85469e-12 | 1.000000 | 4.85469e-12 | 1.000000 |
| rad27                         | 4.55683e-12 | 1.000000 | 4.55683e-12 | 1.000000 |
| rad39                         | 2.67144e-12 | 1.000000 | 2.67144e-12 | 1.000000 |
| PAH10+CH3                     | 1.69608e-12 | 1.000000 | 1.69608e-12 | 1.000000 |
| rad59                         | 1.13700e-12 | 1.000000 | 1.13700e-12 | 1.000000 |
| Phenyl+cycC3H4                | 8.50544e-13 | 1.000000 | 0.000000    | 1.000000 |
| rad46                         | 7.38527e-13 | 1.000000 | 7.38527e-13 | 1.000000 |
| PhcycC3H3_B+H                 | 6.69117e-13 | 1.000000 | 6.69117e-13 | 1.000000 |
| rad18                         | 4.87917e-13 | 1.000000 | 4.87917e-13 | 1.000000 |
| rad43                         | 1.39694e-13 | 1.000000 | 1.39694e-13 | 1.000000 |
| rad20                         | 3.87399e-14 | 1.000000 | 3.87399e-14 | 1.000000 |
| rad25                         | 2.51113e-14 | 1.000000 | 2.51113e-14 | 1.000000 |
| rad21                         | 2.48700e-14 | 1.000000 | 2.48700e-14 | 1.000000 |
| rad62                         | 2.34933e-14 | 1.000000 | 2.34933e-14 | 1.000000 |
| rad33                         | 1.23835e-14 | 1.000000 | 1.23835e-14 | 1.000000 |
| rad50                         | 8.68862e-15 | 1.000000 | 8.68862e-15 | 1.000000 |
| rad54                         | 2.53434e-15 | 1.000000 | 2.53434e-15 | 1.000000 |
| rad70                         | 1.90756e-15 | 1.000000 | 1.90756e-15 | 1.000000 |
| PAH1+H                        | 5.71092e-16 | 1.000000 | 5.71092e-16 | 1.000000 |
| rad58                         | 3.74516e-16 | 1.000000 | 3.74516e-16 | 1.000000 |
| rad24                         | 2.34342e-16 | 1.000000 | 2.34342e-16 | 1.000000 |
| rad52                         | 9.17242e-17 | 1.000000 | 9.17242e-17 | 1.000000 |



|           |             |          |             |          |
|-----------|-------------|----------|-------------|----------|
| rad31     | 7.30055e-17 | 1.000000 | 7.30055e-17 | 1.000000 |
| rad34     | 5.87268e-17 | 1.000000 | 5.87268e-17 | 1.000000 |
| rad41     | 4.48997e-17 | 1.000000 | 4.48997e-17 | 1.000000 |
| rad51     | 4.25320e-17 | 1.000000 | 4.25320e-17 | 1.000000 |
| rad55     | 3.85897e-17 | 1.000000 | 3.85897e-17 | 1.000000 |
| rad42     | 1.91673e-17 | 1.000000 | 1.91673e-17 | 1.000000 |
| rad65     | 1.01872e-18 | 1.000000 | 1.01872e-18 | 1.000000 |
| rad61     | 4.45899e-20 | 1.000000 | 4.45899e-20 | 1.000000 |
| rad53     | 1.83648e-20 | 1.000000 | 1.83648e-20 | 1.000000 |
| rad64     | 1.85728e-21 | 1.000000 | 1.85728e-21 | 1.000000 |
| rad68syn  | 3.28146e-22 | 1.000000 | 3.28146e-22 | 1.000000 |
| rad68anti | 2.44627e-22 | 1.000000 | 2.44627e-22 | 1.000000 |
| rad56     | 2.27856e-22 | 1.000000 | 2.27856e-22 | 1.000000 |
| rad40syn  | 1.55761e-23 | 1.000000 | 1.55761e-23 | 1.000000 |
| rad40anti | 1.36003e-23 | 1.000000 | 1.36003e-23 | 1.000000 |
| rad47     | 8.60875e-24 | 1.000000 | 8.60875e-24 | 1.000000 |
| PAH8+H    | 2.69250e-24 | 1.000000 | 2.69250e-24 | 1.000000 |
| rad73     | 2.36258e-25 | 1.000000 | 2.36258e-25 | 1.000000 |
| rad71     | 2.53686e-27 | 1.000000 | 2.53686e-27 | 1.000000 |
| rad19syn  | 4.34185e-29 | 1.000000 | 4.34185e-29 | 1.000000 |
| rad8      | 7.36642e-47 | 1.000000 | 7.36642e-47 | 1.000000 |

1000.00000 Pa, 250.000000 K

| Rate constant             | True (fraction)        | Effective (fraction)   |
|---------------------------|------------------------|------------------------|
| Total                     | 2.71048e-14 (1.00 )    | 2.71048e-14 (1.00 )    |
| Formation of rad19        | 2.70930e-14 (1.000 )   | 2.70930e-14 (1.000 )   |
| H-abstraction to cyc2enyl | 1.17991e-17 (0.000435) | 1.17991e-17 (0.000435) |
| H-abstraction to cyclenyl | 1.59554e-20 (5.89e-07) | 1.59554e-20 (5.89e-07) |

| species                       | PYtrue      | Cumul    | PYeffective | Cumul    |
|-------------------------------|-------------|----------|-------------|----------|
| rad9                          | 0.629553    | 0.629553 | 0.629553    | 0.629553 |
| Indene+H                      | 0.368989    | 0.998543 | 0.368989    | 0.998543 |
| rad15                         | 0.000917178 | 0.999460 | 0.000917178 | 0.999460 |
| Benzene+cycloprop-2-enylidene | 0.000435312 | 0.999895 | 0.000435312 | 0.999895 |
| PhCHCCH2+H                    | 9.47228e-05 | 0.999990 | 9.47228e-05 | 0.999990 |
| rad6                          | 4.73721e-06 | 0.999994 | 4.73721e-06 | 0.999994 |
| rad2                          | 1.72753e-06 | 0.999996 | 1.72753e-06 | 0.999996 |
| PhCCH+CH3                     | 5.97452e-07 | 0.999997 | 5.97452e-07 | 0.999997 |
| Benzene+cycloprop-1-enylidene | 5.88656e-07 | 0.999997 | 5.88656e-07 | 0.999997 |
| C2H2+PhCH2                    | 5.33382e-07 | 0.999998 | 5.33382e-07 | 0.999998 |
| rad26                         | 5.11319e-07 | 0.999998 | 5.11319e-07 | 0.999998 |
| PhCCCH3+H                     | 4.45415e-07 | 0.999999 | 4.45415e-07 | 0.999999 |
| Ph+MeAc                       | 3.63543e-07 | 0.999999 | 3.63543e-07 | 0.999999 |
| rad67                         | 2.49832e-07 | 1.000000 | 2.49832e-07 | 1.000000 |
| rad10                         | 2.04512e-07 | 1.000000 | 2.04512e-07 | 1.000000 |
| rad23                         | 1.49467e-07 | 1.000000 | 1.49467e-07 | 1.000000 |
| rad1                          | 1.23053e-07 | 1.000000 | 1.23053e-07 | 1.000000 |
| rad35                         | 1.07355e-07 | 1.000000 | 1.07355e-07 | 1.000000 |
| rad3                          | 2.28748e-08 | 1.000000 | 2.28748e-08 | 1.000000 |
| rad45                         | 1.91333e-08 | 1.000000 | 1.91333e-08 | 1.000000 |
| rad4                          | 1.19273e-08 | 1.000000 | 1.19273e-08 | 1.000000 |
| Ph+Allene                     | 1.02444e-08 | 1.000000 | 1.02444e-08 | 1.000000 |
| rad12                         | 4.79711e-09 | 1.000000 | 4.79711e-09 | 1.000000 |
| rad7                          | 2.81690e-09 | 1.000000 | 2.81690e-09 | 1.000000 |
| rad19anti                     | 2.76673e-09 | 1.000000 | 2.76673e-09 | 1.000000 |
| PhCH2CCH+H                    | 2.34022e-09 | 1.000000 | 2.34022e-09 | 1.000000 |
| rad30                         | 1.91469e-09 | 1.000000 | 1.91469e-09 | 1.000000 |
| rad11                         | 1.87463e-09 | 1.000000 | 1.87463e-09 | 1.000000 |
| rad28                         | 1.28828e-09 | 1.000000 | 1.28828e-09 | 1.000000 |
| rad36                         | 1.21366e-09 | 1.000000 | 1.21366e-09 | 1.000000 |
| rad22                         | 6.27958e-10 | 1.000000 | 6.27958e-10 | 1.000000 |
| rad37                         | 5.74981e-10 | 1.000000 | 5.74981e-10 | 1.000000 |
| PhcycC3H3_A+H                 | 7.16793e-11 | 1.000000 | 7.16793e-11 | 1.000000 |
| rad5                          | 3.25852e-11 | 1.000000 | 3.25852e-11 | 1.000000 |
| PAH9+H                        | 3.02333e-11 | 1.000000 | 3.02333e-11 | 1.000000 |
| PAH7+H                        | 2.40324e-11 | 1.000000 | 2.40324e-11 | 1.000000 |
| rad38                         | 1.50915e-11 | 1.000000 | 1.50915e-11 | 1.000000 |
| rad60syn                      | 1.15683e-11 | 1.000000 | 1.15683e-11 | 1.000000 |
| rad13                         | 1.14061e-11 | 1.000000 | 1.14061e-11 | 1.000000 |
| PAH3+H                        | 7.37361e-12 | 1.000000 | 7.37361e-12 | 1.000000 |
| rad60anti                     | 5.82934e-12 | 1.000000 | 5.82934e-12 | 1.000000 |
| rad14                         | 5.35263e-12 | 1.000000 | 5.35263e-12 | 1.000000 |
| rad27                         | 4.76519e-12 | 1.000000 | 4.76519e-12 | 1.000000 |
| rad39                         | 4.22245e-12 | 1.000000 | 4.22245e-12 | 1.000000 |
| PAH10+CH3                     | 2.58239e-12 | 1.000000 | 2.58239e-12 | 1.000000 |
| rad59                         | 1.41390e-12 | 1.000000 | 1.41390e-12 | 1.000000 |
| Phenyl+cycC3H4                | 1.23952e-12 | 1.000000 | 0.000000    | 1.000000 |

|               |             |         |             |         |
|---------------|-------------|---------|-------------|---------|
| PhcycC3H3_B+H | 1.07203e-12 | 1.00000 | 1.07203e-12 | 1.00000 |
| rad46         | 9.55487e-13 | 1.00000 | 9.55487e-13 | 1.00000 |
| rad18         | 4.61884e-13 | 1.00000 | 4.61884e-13 | 1.00000 |
| rad43         | 1.96730e-13 | 1.00000 | 1.96730e-13 | 1.00000 |
| rad20         | 3.90941e-14 | 1.00000 | 3.90941e-14 | 1.00000 |
| rad62         | 3.30743e-14 | 1.00000 | 3.30743e-14 | 1.00000 |
| rad25         | 2.61619e-14 | 1.00000 | 2.61619e-14 | 1.00000 |
| rad21         | 2.50896e-14 | 1.00000 | 2.50896e-14 | 1.00000 |
| rad33         | 1.38561e-14 | 1.00000 | 1.38561e-14 | 1.00000 |
| rad50         | 1.21595e-14 | 1.00000 | 1.21595e-14 | 1.00000 |
| rad54         | 4.03708e-15 | 1.00000 | 4.03708e-15 | 1.00000 |
| rad70         | 2.75370e-15 | 1.00000 | 2.75370e-15 | 1.00000 |
| PAH1+H        | 9.78824e-16 | 1.00000 | 9.78824e-16 | 1.00000 |
| rad58         | 5.37335e-16 | 1.00000 | 5.37335e-16 | 1.00000 |
| rad24         | 2.42162e-16 | 1.00000 | 2.42162e-16 | 1.00000 |
| rad52         | 1.35233e-16 | 1.00000 | 1.35233e-16 | 1.00000 |
| rad34         | 9.06440e-17 | 1.00000 | 9.06440e-17 | 1.00000 |
| rad31         | 8.42539e-17 | 1.00000 | 8.42539e-17 | 1.00000 |
| rad41         | 7.45386e-17 | 1.00000 | 7.45386e-17 | 1.00000 |
| rad51         | 6.62251e-17 | 1.00000 | 6.62251e-17 | 1.00000 |
| rad55         | 6.52192e-17 | 1.00000 | 6.52192e-17 | 1.00000 |
| rad42         | 3.09579e-17 | 1.00000 | 3.09579e-17 | 1.00000 |
| rad65         | 1.63105e-18 | 1.00000 | 1.63105e-18 | 1.00000 |
| rad61         | 1.06577e-19 | 1.00000 | 1.06577e-19 | 1.00000 |
| rad53         | 3.98716e-20 | 1.00000 | 3.98716e-20 | 1.00000 |
| rad64         | 4.69537e-21 | 1.00000 | 4.69537e-21 | 1.00000 |
| rad68syn      | 7.89265e-22 | 1.00000 | 7.89265e-22 | 1.00000 |
| rad56         | 6.07763e-22 | 1.00000 | 6.07763e-22 | 1.00000 |
| rad68anti     | 5.84987e-22 | 1.00000 | 5.84987e-22 | 1.00000 |
| rad40syn      | 4.46780e-23 | 1.00000 | 4.46780e-23 | 1.00000 |
| rad40anti     | 3.90998e-23 | 1.00000 | 3.90998e-23 | 1.00000 |
| rad47         | 1.04696e-23 | 1.00000 | 1.04696e-23 | 1.00000 |
| PAH8+H        | 8.71603e-24 | 1.00000 | 8.71603e-24 | 1.00000 |
| rad73         | 7.07381e-25 | 1.00000 | 7.07381e-25 | 1.00000 |
| rad71         | 8.85680e-27 | 1.00000 | 8.85680e-27 | 1.00000 |
| rad19syn      | 1.76489e-28 | 1.00000 | 1.76489e-28 | 1.00000 |
| rad8          | 1.14266e-46 | 1.00000 | 1.14266e-46 | 1.00000 |

1000.00000 Pa, 260.000000 K

| Rate constant             | True (fraction)        | Effective (fraction)   |
|---------------------------|------------------------|------------------------|
| Total                     | 2.97464e-14 (1.00 )    | 2.97464e-14 (1.00 )    |
| Formation of rad19        | 2.97293e-14 (0.999 )   | 2.97293e-14 (0.999 )   |
| H-abstraction to cyc2enyl | 1.70236e-17 (0.000572) | 1.70236e-17 (0.000572) |
| H-abstraction to cyclenyl | 3.02186e-20 (1.02e-06) | 3.02186e-20 (1.02e-06) |

| species                       | PYtrue      | Cumul    | PYeffective | Cumul    |
|-------------------------------|-------------|----------|-------------|----------|
| rad9                          | 0.609689    | 0.609689 | 0.609689    | 0.609689 |
| Indene+H                      | 0.388736    | 0.998425 | 0.388736    | 0.998425 |
| rad15                         | 0.000883578 | 0.999309 | 0.000883578 | 0.999309 |
| Benzene+cycloprop-2-enylidene | 0.000572291 | 0.999881 | 0.000572291 | 0.999881 |
| PhCHCCH2+H                    | 0.000106827 | 0.999988 | 0.000106827 | 0.999988 |
| rad6                          | 5.36330e-06 | 0.999993 | 5.36330e-06 | 0.999993 |
| rad2                          | 1.81566e-06 | 0.999995 | 1.81566e-06 | 0.999995 |
| Benzene+cycloprop-1-enylidene | 1.01588e-06 | 0.999996 | 1.01588e-06 | 0.999996 |
| PhCCH+CH3                     | 7.23771e-07 | 0.999997 | 7.23771e-07 | 0.999997 |
| C2H2+PhCH2                    | 6.16841e-07 | 0.999997 | 6.16841e-07 | 0.999997 |
| rad26                         | 5.64595e-07 | 0.999998 | 5.64595e-07 | 0.999998 |
| PhCCCH3+H                     | 5.45389e-07 | 0.999999 | 5.45389e-07 | 0.999999 |
| Ph+MeAc                       | 4.54165e-07 | 0.999999 | 4.54165e-07 | 0.999999 |
| rad67                         | 2.88732e-07 | 0.999999 | 2.88732e-07 | 0.999999 |
| rad10                         | 2.14856e-07 | 1.000000 | 2.14856e-07 | 1.000000 |
| rad23                         | 1.55182e-07 | 1.000000 | 1.55182e-07 | 1.000000 |
| rad1                          | 1.30925e-07 | 1.000000 | 1.30925e-07 | 1.000000 |
| rad35                         | 1.23628e-07 | 1.000000 | 1.23628e-07 | 1.000000 |
| rad3                          | 2.39974e-08 | 1.000000 | 2.39974e-08 | 1.000000 |
| rad45                         | 1.97094e-08 | 1.000000 | 1.97094e-08 | 1.000000 |
| Ph+Allene                     | 1.26392e-08 | 1.000000 | 1.26392e-08 | 1.000000 |
| rad4                          | 1.25558e-08 | 1.000000 | 1.25558e-08 | 1.000000 |
| rad12                         | 4.68022e-09 | 1.000000 | 4.68022e-09 | 1.000000 |
| rad7                          | 3.16357e-09 | 1.000000 | 3.16357e-09 | 1.000000 |
| PhCH2CCH+H                    | 2.95226e-09 | 1.000000 | 2.95226e-09 | 1.000000 |
| rad19anti                     | 2.71730e-09 | 1.000000 | 2.71730e-09 | 1.000000 |
| rad30                         | 2.21333e-09 | 1.000000 | 2.21333e-09 | 1.000000 |
| rad11                         | 2.00437e-09 | 1.000000 | 2.00437e-09 | 1.000000 |
| rad28                         | 1.64745e-09 | 1.000000 | 1.64745e-09 | 1.000000 |
| rad36                         | 1.25753e-09 | 1.000000 | 1.25753e-09 | 1.000000 |
| rad37                         | 7.68327e-10 | 1.000000 | 7.68327e-10 | 1.000000 |

|                |             |         |             |         |
|----------------|-------------|---------|-------------|---------|
| rad22          | 6.21883e-10 | 1.00000 | 6.21883e-10 | 1.00000 |
| PhcycC3H3_A+H  | 9.58291e-11 | 1.00000 | 9.58291e-11 | 1.00000 |
| PAH9+H         | 3.83828e-11 | 1.00000 | 3.83828e-11 | 1.00000 |
| PAH7+H         | 3.52267e-11 | 1.00000 | 3.52267e-11 | 1.00000 |
| rad5           | 3.14369e-11 | 1.00000 | 3.14369e-11 | 1.00000 |
| rad38          | 1.96228e-11 | 1.00000 | 1.96228e-11 | 1.00000 |
| rad60syn       | 1.38920e-11 | 1.00000 | 1.38920e-11 | 1.00000 |
| rad13          | 1.27649e-11 | 1.00000 | 1.27649e-11 | 1.00000 |
| PAH3+H         | 9.28042e-12 | 1.00000 | 9.28042e-12 | 1.00000 |
| rad60anti      | 7.02368e-12 | 1.00000 | 7.02368e-12 | 1.00000 |
| rad39          | 6.67605e-12 | 1.00000 | 6.67605e-12 | 1.00000 |
| rad14          | 5.58033e-12 | 1.00000 | 5.58033e-12 | 1.00000 |
| rad27          | 4.96371e-12 | 1.00000 | 4.96371e-12 | 1.00000 |
| PAH10+CH3      | 3.92735e-12 | 1.00000 | 3.92735e-12 | 1.00000 |
| Phenyl+cycC3H4 | 1.79997e-12 | 1.00000 | 0.00000     | 1.00000 |
| rad59          | 1.76556e-12 | 1.00000 | 1.76556e-12 | 1.00000 |
| PhcycC3H3_B+H  | 1.69545e-12 | 1.00000 | 1.69545e-12 | 1.00000 |
| rad46          | 1.23955e-12 | 1.00000 | 1.23955e-12 | 1.00000 |
| rad18          | 4.41655e-13 | 1.00000 | 4.41655e-13 | 1.00000 |
| rad43          | 2.76191e-13 | 1.00000 | 2.76191e-13 | 1.00000 |
| rad62          | 4.63542e-14 | 1.00000 | 4.63542e-14 | 1.00000 |
| rad20          | 3.98881e-14 | 1.00000 | 3.98881e-14 | 1.00000 |
| rad25          | 2.75198e-14 | 1.00000 | 2.75198e-14 | 1.00000 |
| rad21          | 2.55918e-14 | 1.00000 | 2.55918e-14 | 1.00000 |
| rad50          | 1.70794e-14 | 1.00000 | 1.70794e-14 | 1.00000 |
| rad33          | 1.55307e-14 | 1.00000 | 1.55307e-14 | 1.00000 |
| rad54          | 6.45273e-15 | 1.00000 | 6.45273e-15 | 1.00000 |
| rad70          | 3.99012e-15 | 1.00000 | 3.99012e-15 | 1.00000 |
| PAH1+H         | 1.66522e-15 | 1.00000 | 1.66522e-15 | 1.00000 |
| rad58          | 7.73133e-16 | 1.00000 | 7.73133e-16 | 1.00000 |
| rad24          | 2.49872e-16 | 1.00000 | 2.49872e-16 | 1.00000 |
| rad52          | 2.00017e-16 | 1.00000 | 2.00017e-16 | 1.00000 |
| rad34          | 1.40045e-16 | 1.00000 | 1.40045e-16 | 1.00000 |
| rad41          | 1.22375e-16 | 1.00000 | 1.22375e-16 | 1.00000 |
| rad55          | 1.10294e-16 | 1.00000 | 1.10294e-16 | 1.00000 |
| rad51          | 1.03311e-16 | 1.00000 | 1.03311e-16 | 1.00000 |
| rad31          | 9.75972e-17 | 1.00000 | 9.75972e-17 | 1.00000 |
| rad42          | 4.94506e-17 | 1.00000 | 4.94506e-17 | 1.00000 |
| rad65          | 2.61009e-18 | 1.00000 | 2.61009e-18 | 1.00000 |
| rad61          | 2.44142e-19 | 1.00000 | 2.44142e-19 | 1.00000 |
| rad53          | 8.47462e-20 | 1.00000 | 8.47462e-20 | 1.00000 |
| rad64          | 1.14174e-20 | 1.00000 | 1.14174e-20 | 1.00000 |
| rad68syn       | 1.81700e-21 | 1.00000 | 1.81700e-21 | 1.00000 |
| rad56          | 1.54276e-21 | 1.00000 | 1.54276e-21 | 1.00000 |
| rad68anti      | 1.33976e-21 | 1.00000 | 1.33976e-21 | 1.00000 |
| rad40syn       | 1.19424e-22 | 1.00000 | 1.19424e-22 | 1.00000 |
| rad40anti      | 1.04705e-22 | 1.00000 | 1.04705e-22 | 1.00000 |
| PAH8+H         | 2.58346e-23 | 1.00000 | 2.58346e-23 | 1.00000 |
| rad47          | 1.28861e-23 | 1.00000 | 1.28861e-23 | 1.00000 |
| rad73          | 1.97274e-24 | 1.00000 | 1.97274e-24 | 1.00000 |
| rad71          | 2.80611e-26 | 1.00000 | 2.80611e-26 | 1.00000 |
| rad19syn       | 7.47167e-28 | 1.00000 | 7.47167e-28 | 1.00000 |
| rad8           | 1.80462e-46 | 1.00000 | 1.80462e-46 | 1.00000 |

1000.00000 Pa, 270.000000 K

| Rate constant             | True (fraction)        | Effective (fraction)   |
|---------------------------|------------------------|------------------------|
| Total                     | 3.24655e-14 (1.00 )    | 3.24655e-14 (1.00 )    |
| Formation of rad19        | 3.24415e-14 (0.999 )   | 3.24415e-14 (0.999 )   |
| H-abstraction to cyc2enyl | 2.38790e-17 (0.000736) | 2.38790e-17 (0.000736) |
| H-abstraction to cyclenyl | 5.45397e-20 (1.68e-06) | 5.45397e-20 (1.68e-06) |

| species                       | PYtrue      | Cumul    | PYeffective | Cumul    |
|-------------------------------|-------------|----------|-------------|----------|
| rad9                          | 0.589244    | 0.589244 | 0.589244    | 0.589244 |
| Indene+H                      | 0.409035    | 0.998280 | 0.409035    | 0.998280 |
| rad15                         | 0.000849679 | 0.999129 | 0.000849679 | 0.999129 |
| Benzene+cycloprop-2-enylidene | 0.000735519 | 0.999865 | 0.000735519 | 0.999865 |
| PhCHCCH2+H                    | 0.000120616 | 0.999985 | 0.000120616 | 0.999985 |
| rad6                          | 6.07582e-06 | 0.999991 | 6.07582e-06 | 0.999991 |
| rad2                          | 1.89920e-06 | 0.999993 | 1.89920e-06 | 0.999993 |
| Benzene+cycloprop-1-enylidene | 1.67993e-06 | 0.999995 | 1.67993e-06 | 0.999995 |
| PhCCH+CH3                     | 8.73566e-07 | 0.999996 | 8.73566e-07 | 0.999996 |
| C2H2+PhCH2                    | 7.14911e-07 | 0.999997 | 7.14911e-07 | 0.999997 |
| PhCCCH3+H                     | 6.65859e-07 | 0.999997 | 6.65859e-07 | 0.999997 |
| rad26                         | 6.21662e-07 | 0.999998 | 6.21662e-07 | 0.999998 |
| Ph+MeAc                       | 5.65776e-07 | 0.999998 | 5.65776e-07 | 0.999998 |
| rad67                         | 3.34255e-07 | 0.999999 | 3.34255e-07 | 0.999999 |
| rad10                         | 2.24666e-07 | 0.999999 | 2.24666e-07 | 0.999999 |

|                |             |          |             |          |
|----------------|-------------|----------|-------------|----------|
| rad23          | 1.60563e-07 | 0.999999 | 1.60563e-07 | 0.999999 |
| rad35          | 1.42600e-07 | 0.999999 | 1.42600e-07 | 0.999999 |
| rad1           | 1.38766e-07 | 0.999999 | 1.38766e-07 | 0.999999 |
| rad3           | 2.50575e-08 | 0.999999 | 2.50575e-08 | 0.999999 |
| rad45          | 2.02475e-08 | 0.999999 | 2.02475e-08 | 0.999999 |
| Ph+Allene      | 1.56644e-08 | 0.999999 | 1.56644e-08 | 0.999999 |
| rad4           | 1.31593e-08 | 1.000000 | 1.31593e-08 | 1.000000 |
| rad12          | 4.56320e-09 | 1.000000 | 4.56320e-09 | 1.000000 |
| PhCH2CCH+H     | 3.74026e-09 | 1.000000 | 3.74026e-09 | 1.000000 |
| rad7           | 3.55640e-09 | 1.000000 | 3.55640e-09 | 1.000000 |
| rad19anti      | 2.67394e-09 | 1.000000 | 2.67394e-09 | 1.000000 |
| rad30          | 2.56365e-09 | 1.000000 | 2.56365e-09 | 1.000000 |
| rad11          | 2.15956e-09 | 1.000000 | 2.15956e-09 | 1.000000 |
| rad28          | 2.10477e-09 | 1.000000 | 2.10477e-09 | 1.000000 |
| rad36          | 1.30020e-09 | 1.000000 | 1.30020e-09 | 1.000000 |
| rad37          | 1.02598e-09 | 1.000000 | 1.02598e-09 | 1.000000 |
| rad22          | 6.17785e-10 | 1.000000 | 6.17785e-10 | 1.000000 |
| PhcycC3H3_A+H  | 1.28087e-10 | 1.000000 | 1.28087e-10 | 1.000000 |
| PAH7+H         | 5.21802e-11 | 1.000000 | 5.21802e-11 | 1.000000 |
| PAH9+H         | 4.87814e-11 | 1.000000 | 4.87814e-11 | 1.000000 |
| rad5           | 3.02300e-11 | 1.000000 | 3.02300e-11 | 1.000000 |
| rad38          | 2.56058e-11 | 1.000000 | 2.56058e-11 | 1.000000 |
| rad60syn       | 1.67325e-11 | 1.000000 | 1.67325e-11 | 1.000000 |
| rad13          | 1.43038e-11 | 1.000000 | 1.43038e-11 | 1.000000 |
| PAH3+H         | 1.17246e-11 | 1.000000 | 1.17246e-11 | 1.000000 |
| rad39          | 1.05369e-11 | 1.000000 | 1.05369e-11 | 1.000000 |
| rad60anti      | 8.48861e-12 | 1.000000 | 8.48861e-12 | 1.000000 |
| PAH10+CH3      | 5.95441e-12 | 1.000000 | 5.95441e-12 | 1.000000 |
| rad14          | 5.79313e-12 | 1.000000 | 5.79313e-12 | 1.000000 |
| rad27          | 5.14915e-12 | 1.000000 | 5.14915e-12 | 1.000000 |
| PhcycC3H3_B+H  | 2.64826e-12 | 1.000000 | 2.64826e-12 | 1.000000 |
| Phenyl+cycC3H4 | 2.60320e-12 | 1.000000 | 0.00000     | 1.000000 |
| rad59          | 2.21261e-12 | 1.000000 | 2.21261e-12 | 1.000000 |
| rad46          | 1.61149e-12 | 1.000000 | 1.61149e-12 | 1.000000 |
| rad18          | 4.26654e-13 | 1.000000 | 4.26654e-13 | 1.000000 |
| rad43          | 3.86172e-13 | 1.000000 | 3.86172e-13 | 1.000000 |
| rad62          | 6.46243e-14 | 1.000000 | 6.46243e-14 | 1.000000 |
| rad20          | 4.11129e-14 | 1.000000 | 4.11129e-14 | 1.000000 |
| rad25          | 2.92033e-14 | 1.000000 | 2.92033e-14 | 1.000000 |
| rad21          | 2.63703e-14 | 1.000000 | 2.63703e-14 | 1.000000 |
| rad50          | 2.40506e-14 | 1.000000 | 2.40506e-14 | 1.000000 |
| rad33          | 1.74332e-14 | 1.000000 | 1.74332e-14 | 1.000000 |
| rad54          | 1.03268e-14 | 1.000000 | 1.03268e-14 | 1.000000 |
| rad70          | 5.79579e-15 | 1.000000 | 5.79579e-15 | 1.000000 |
| PAH1+H         | 2.80646e-15 | 1.000000 | 2.80646e-15 | 1.000000 |
| rad58          | 1.11402e-15 | 1.000000 | 1.11402e-15 | 1.000000 |
| rad52          | 2.96329e-16 | 1.000000 | 2.96329e-16 | 1.000000 |
| rad24          | 2.57410e-16 | 1.000000 | 2.57410e-16 | 1.000000 |
| rad34          | 2.16247e-16 | 1.000000 | 2.16247e-16 | 1.000000 |
| rad41          | 1.98530e-16 | 1.000000 | 1.98530e-16 | 1.000000 |
| rad55          | 1.86171e-16 | 1.000000 | 1.86171e-16 | 1.000000 |
| rad51          | 1.61158e-16 | 1.000000 | 1.61158e-16 | 1.000000 |
| rad31          | 1.13532e-16 | 1.000000 | 1.13532e-16 | 1.000000 |
| rad42          | 7.80721e-17 | 1.000000 | 7.80721e-17 | 1.000000 |
| rad65          | 4.16692e-18 | 1.000000 | 4.16692e-18 | 1.000000 |
| rad61          | 5.36438e-19 | 1.000000 | 5.36438e-19 | 1.000000 |
| rad53          | 1.75921e-19 | 1.000000 | 1.75921e-19 | 1.000000 |
| rad64          | 2.66552e-20 | 1.000000 | 2.66552e-20 | 1.000000 |
| rad68syn       | 4.00972e-21 | 1.000000 | 4.00972e-21 | 1.000000 |
| rad56          | 3.72776e-21 | 1.000000 | 3.72776e-21 | 1.000000 |
| rad68anti      | 2.94309e-21 | 1.000000 | 2.94309e-21 | 1.000000 |
| rad40syn       | 2.98882e-22 | 1.000000 | 2.98882e-22 | 1.000000 |
| rad40anti      | 2.62428e-22 | 1.000000 | 2.62428e-22 | 1.000000 |
| PAH8+H         | 7.06120e-23 | 1.000000 | 7.06120e-23 | 1.000000 |
| rad47          | 1.60724e-23 | 1.000000 | 1.60724e-23 | 1.000000 |
| rad73          | 5.14316e-24 | 1.000000 | 5.14316e-24 | 1.000000 |
| rad71          | 8.13550e-26 | 1.000000 | 8.13550e-26 | 1.000000 |
| rad19syn       | 3.28282e-27 | 1.000000 | 3.28282e-27 | 1.000000 |
| rad8           | 2.90096e-46 | 1.000000 | 2.90096e-46 | 1.000000 |

1000.00000 Pa, 280.000000 K

| Rate constant             | True (fraction)        | Effective (fraction)   |
|---------------------------|------------------------|------------------------|
| Total                     | 3.52572e-14 (1.00 )    | 3.52572e-14 (1.00 )    |
| Formation of rad19        | 3.52244e-14 (0.999 )   | 3.52244e-14 (0.999 )   |
| H-abstraction to cyc2enyl | 3.26639e-17 (0.000926) | 3.26639e-17 (0.000926) |
| H-abstraction to cyclenyl | 9.42926e-20 (2.67e-06) | 9.42926e-20 (2.67e-06) |
| species                   | PYtrue                 | Cumul                  |
|                           | PYeffective            | Cumul                  |

|                               |             |          |             |          |
|-------------------------------|-------------|----------|-------------|----------|
| rad9                          | 0.568248    | 0.568248 | 0.568248    | 0.568248 |
| Indene+H                      | 0.429857    | 0.998105 | 0.429857    | 0.998105 |
| Benzene+cycloprop-2-enylidene | 0.000926445 | 0.999031 | 0.000926445 | 0.999031 |
| rad15                         | 0.000815493 | 0.999847 | 0.000815493 | 0.999847 |
| PhCHCCH2+H                    | 0.000136318 | 0.999983 | 0.000136318 | 0.999983 |
| rad6                          | 6.88543e-06 | 0.999990 | 6.88543e-06 | 0.999990 |
| Benzene+cycloprop-1-enylidene | 2.67442e-06 | 0.999993 | 2.67442e-06 | 0.999993 |
| rad2                          | 1.97679e-06 | 0.999995 | 1.97679e-06 | 0.999995 |
| PhCCH+CH3                     | 1.05016e-06 | 0.999996 | 1.05016e-06 | 0.999996 |
| C2H2+PhCH2                    | 8.30193e-07 | 0.999996 | 8.30193e-07 | 0.999996 |
| PhCCCH3+H                     | 8.10264e-07 | 0.999997 | 8.10264e-07 | 0.999997 |
| Ph+MeAc                       | 7.02502e-07 | 0.999998 | 7.02502e-07 | 0.999998 |
| rad26                         | 6.82197e-07 | 0.999999 | 6.82197e-07 | 0.999999 |
| rad67                         | 3.87509e-07 | 0.999999 | 3.87509e-07 | 0.999999 |
| rad10                         | 2.33788e-07 | 0.999999 | 2.33788e-07 | 0.999999 |
| rad23                         | 1.65543e-07 | 0.999999 | 1.65543e-07 | 0.999999 |
| rad35                         | 1.64710e-07 | 1.000000 | 1.64710e-07 | 1.000000 |
| rad1                          | 1.46494e-07 | 1.000000 | 1.46494e-07 | 1.000000 |
| rad3                          | 2.60379e-08 | 1.000000 | 2.60379e-08 | 1.000000 |
| rad45                         | 2.07412e-08 | 1.000000 | 2.07412e-08 | 1.000000 |
| Ph+Allene                     | 1.94945e-08 | 1.000000 | 1.94945e-08 | 1.000000 |
| rad4                          | 1.37291e-08 | 1.000000 | 1.37291e-08 | 1.000000 |
| PhCH2CCH+H                    | 4.75607e-09 | 1.000000 | 4.75607e-09 | 1.000000 |
| rad12                         | 4.44588e-09 | 1.000000 | 4.44588e-09 | 1.000000 |
| rad7                          | 4.00083e-09 | 1.000000 | 4.00083e-09 | 1.000000 |
| rad30                         | 2.97456e-09 | 1.000000 | 2.97456e-09 | 1.000000 |
| rad28                         | 2.68413e-09 | 1.000000 | 2.68413e-09 | 1.000000 |
| rad19anti                     | 2.63651e-09 | 1.000000 | 2.63651e-09 | 1.000000 |
| rad11                         | 2.34236e-09 | 1.000000 | 2.34236e-09 | 1.000000 |
| rad37                         | 1.36756e-09 | 1.000000 | 1.36756e-09 | 1.000000 |
| rad36                         | 1.34134e-09 | 1.000000 | 1.34134e-09 | 1.000000 |
| rad22                         | 6.15408e-10 | 1.000000 | 6.15408e-10 | 1.000000 |
| PhcycC3H3_A+H                 | 1.71042e-10 | 1.000000 | 1.71042e-10 | 1.000000 |
| PAH7+H                        | 7.78442e-11 | 1.000000 | 7.78442e-11 | 1.000000 |
| PAH9+H                        | 6.20346e-11 | 1.000000 | 6.20346e-11 | 1.000000 |
| rad38                         | 3.35046e-11 | 1.000000 | 3.35046e-11 | 1.000000 |
| rad5                          | 2.89753e-11 | 1.000000 | 2.89753e-11 | 1.000000 |
| rad60syn                      | 2.02053e-11 | 1.000000 | 2.02053e-11 | 1.000000 |
| rad39                         | 1.65662e-11 | 1.000000 | 1.65662e-11 | 1.000000 |
| rad13                         | 1.60443e-11 | 1.000000 | 1.60443e-11 | 1.000000 |
| PAH3+H                        | 1.48583e-11 | 1.000000 | 1.48583e-11 | 1.000000 |
| rad60anti                     | 1.02859e-11 | 1.000000 | 1.02859e-11 | 1.000000 |
| PAH10+CH3                     | 8.98340e-12 | 1.000000 | 8.98340e-12 | 1.000000 |
| rad14                         | 5.98745e-12 | 1.000000 | 5.98745e-12 | 1.000000 |
| rad27                         | 5.31833e-12 | 1.000000 | 5.31833e-12 | 1.000000 |
| PhcycC3H3_B+H                 | 4.08649e-12 | 1.000000 | 4.08649e-12 | 1.000000 |
| Phenyl+cycC3H4                | 3.74741e-12 | 1.000000 | 0.000000    | 1.000000 |
| rad59                         | 2.78101e-12 | 1.000000 | 2.78101e-12 | 1.000000 |
| rad46                         | 2.09810e-12 | 1.000000 | 2.09810e-12 | 1.000000 |
| rad43                         | 5.37297e-13 | 1.000000 | 5.37297e-13 | 1.000000 |
| rad18                         | 4.16444e-13 | 1.000000 | 4.16444e-13 | 1.000000 |
| rad62                         | 8.95591e-14 | 1.000000 | 8.95591e-14 | 1.000000 |
| rad20                         | 4.27675e-14 | 1.000000 | 4.27675e-14 | 1.000000 |
| rad50                         | 3.39107e-14 | 1.000000 | 3.39107e-14 | 1.000000 |
| rad25                         | 3.12339e-14 | 1.000000 | 3.12339e-14 | 1.000000 |
| rad21                         | 2.74248e-14 | 1.000000 | 2.74248e-14 | 1.000000 |
| rad33                         | 1.95919e-14 | 1.000000 | 1.95919e-14 | 1.000000 |
| rad54                         | 1.65087e-14 | 1.000000 | 1.65087e-14 | 1.000000 |
| rad70                         | 8.42715e-15 | 1.000000 | 8.42715e-15 | 1.000000 |
| PAH1+H                        | 4.67687e-15 | 1.000000 | 4.67687e-15 | 1.000000 |
| rad58                         | 1.60520e-15 | 1.000000 | 1.60520e-15 | 1.000000 |
| rad52                         | 4.39034e-16 | 1.000000 | 4.39034e-16 | 1.000000 |
| rad34                         | 3.33174e-16 | 1.000000 | 3.33174e-16 | 1.000000 |
| rad41                         | 3.18013e-16 | 1.000000 | 3.18013e-16 | 1.000000 |
| rad55                         | 3.12817e-16 | 1.000000 | 3.12817e-16 | 1.000000 |
| rad24                         | 2.64724e-16 | 1.000000 | 2.64724e-16 | 1.000000 |
| rad51                         | 2.50888e-16 | 1.000000 | 2.50888e-16 | 1.000000 |
| rad31                         | 1.32704e-16 | 1.000000 | 1.32704e-16 | 1.000000 |
| rad42                         | 1.21760e-16 | 1.000000 | 1.21760e-16 | 1.000000 |
| rad65                         | 6.62376e-18 | 1.000000 | 6.62376e-18 | 1.000000 |
| rad61                         | 1.13123e-18 | 1.000000 | 1.13123e-18 | 1.000000 |
| rad53                         | 3.55802e-19 | 1.000000 | 3.55802e-19 | 1.000000 |
| rad64                         | 5.96712e-20 | 1.000000 | 5.96712e-20 | 1.000000 |
| rad56                         | 8.57734e-21 | 1.000000 | 8.57734e-21 | 1.000000 |
| rad68syn                      | 8.49039e-21 | 1.000000 | 8.49039e-21 | 1.000000 |
| rad68anti                     | 6.20713e-21 | 1.000000 | 6.20713e-21 | 1.000000 |
| rad40syn                      | 7.03276e-22 | 1.000000 | 7.03276e-22 | 1.000000 |
| rad40anti                     | 6.18231e-22 | 1.000000 | 6.18231e-22 | 1.000000 |
| PAH8+H                        | 1.79110e-22 | 1.000000 | 1.79110e-22 | 1.000000 |

|          |             |          |             |          |
|----------|-------------|----------|-------------|----------|
| rad47    | 2.03430e-23 | 1.000000 | 2.03430e-23 | 1.000000 |
| rad73    | 1.25800e-23 | 1.000000 | 1.25800e-23 | 1.000000 |
| rad71    | 2.17457e-25 | 1.000000 | 2.17457e-25 | 1.000000 |
| rad19syn | 1.49092e-26 | 1.000000 | 1.49092e-26 | 1.000000 |
| rad8     | 4.74620e-46 | 1.000000 | 4.74620e-46 | 1.000000 |

1000.00000 Pa, 290.000000 K

| Rate constant             | True (fraction)        | Effective (fraction)   |
|---------------------------|------------------------|------------------------|
| Total                     | 3.81171e-14 (1.00 )    | 3.81171e-14 (1.00 )    |
| Formation of rad19        | 3.80733e-14 (0.999 )   | 3.80733e-14 (0.999 )   |
| H-abstraction to cyc2enyl | 4.36868e-17 (0.00115 ) | 4.36868e-17 (0.00115 ) |
| H-abstraction to cyclenyl | 1.56861e-19 (4.12e-06) | 1.56861e-19 (4.12e-06) |

| species                       | PYtrue      | Cumul    | PYeffective | Cumul    |
|-------------------------------|-------------|----------|-------------|----------|
| rad9                          | 0.546740    | 0.546740 | 0.546740    | 0.546740 |
| Indene+H                      | 0.451157    | 0.997898 | 0.451157    | 0.997898 |
| Benzene+cycloprop-2-enylidene | 0.00114612  | 0.999044 | 0.00114612  | 0.999044 |
| rad15                         | 0.000781052 | 0.999825 | 0.000781052 | 0.999825 |
| PhCHCCH2+H                    | 0.000154182 | 0.999979 | 0.000154182 | 0.999979 |
| rad6                          | 7.80349e-06 | 0.999987 | 7.80349e-06 | 0.999987 |
| Benzene+cycloprop-1-enylidene | 4.11523e-06 | 0.999991 | 4.11523e-06 | 0.999991 |
| rad2                          | 2.04713e-06 | 0.999993 | 2.04713e-06 | 0.999993 |
| PhCCH+CH3                     | 1.25709e-06 | 0.999994 | 1.25709e-06 | 0.999994 |
| PhCCCH3+H                     | 9.82404e-07 | 0.999995 | 9.82404e-07 | 0.999995 |
| C2H2+PhCH2                    | 9.65697e-07 | 0.999996 | 9.65697e-07 | 0.999996 |
| Ph+MeAc                       | 8.69047e-07 | 0.999997 | 8.69047e-07 | 0.999997 |
| rad26                         | 7.45704e-07 | 0.999998 | 7.45704e-07 | 0.999998 |
| rad67                         | 4.49743e-07 | 0.999998 | 4.49743e-07 | 0.999998 |
| rad10                         | 2.42073e-07 | 0.999999 | 2.42073e-07 | 0.999999 |
| rad35                         | 1.90453e-07 | 0.999999 | 1.90453e-07 | 0.999999 |
| rad23                         | 1.70062e-07 | 0.999999 | 1.70062e-07 | 0.999999 |
| rad1                          | 1.54022e-07 | 0.999999 | 1.54022e-07 | 0.999999 |
| rad3                          | 2.69224e-08 | 0.999999 | 2.69224e-08 | 0.999999 |
| Ph+Allene                     | 2.43508e-08 | 0.999999 | 2.43508e-08 | 0.999999 |
| rad45                         | 2.11858e-08 | 0.999999 | 2.11858e-08 | 0.999999 |
| rad4                          | 1.42568e-08 | 0.999999 | 1.42568e-08 | 0.999999 |
| PhCH2CCH+H                    | 6.06598e-09 | 0.999999 | 6.06598e-09 | 0.999999 |
| rad7                          | 4.50258e-09 | 0.999999 | 4.50258e-09 | 0.999999 |
| rad12                         | 4.32812e-09 | 0.999999 | 4.32812e-09 | 0.999999 |
| rad30                         | 3.45630e-09 | 0.999999 | 3.45630e-09 | 0.999999 |
| rad28                         | 3.41366e-09 | 0.999999 | 3.41366e-09 | 0.999999 |
| rad19anti                     | 2.60476e-09 | 0.999999 | 2.60476e-09 | 0.999999 |
| rad11                         | 2.55512e-09 | 0.999999 | 2.55512e-09 | 0.999999 |
| rad37                         | 1.81748e-09 | 0.999999 | 1.81748e-09 | 0.999999 |
| rad36                         | 1.38069e-09 | 0.999999 | 1.38069e-09 | 0.999999 |
| rad22                         | 6.14548e-10 | 0.999999 | 6.14548e-10 | 0.999999 |
| PhcycC3H3_A+H                 | 2.28027e-10 | 0.999999 | 2.28027e-10 | 0.999999 |
| PAH7+H                        | 1.16546e-10 | 0.999999 | 1.16546e-10 | 0.999999 |
| PAH9+H                        | 7.88951e-11 | 0.999999 | 7.88951e-11 | 0.999999 |
| rad38                         | 4.39175e-11 | 0.999999 | 4.39175e-11 | 0.999999 |
| rad5                          | 2.76830e-11 | 0.999999 | 2.76830e-11 | 0.999999 |
| rad39                         | 2.58895e-11 | 0.999999 | 2.58895e-11 | 0.999999 |
| rad60syn                      | 2.44496e-11 | 0.999999 | 2.44496e-11 | 0.999999 |
| PAH3+H                        | 1.88731e-11 | 0.999999 | 1.88731e-11 | 0.999999 |
| rad13                         | 1.80086e-11 | 0.999999 | 1.80086e-11 | 0.999999 |
| PAH10+CH3                     | 1.34631e-11 | 0.999999 | 1.34631e-11 | 0.999999 |
| rad60anti                     | 1.24900e-11 | 0.999999 | 1.24900e-11 | 0.999999 |
| PhcycC3H3_B+H                 | 6.22932e-12 | 0.999999 | 6.22932e-12 | 0.999999 |
| rad14                         | 6.16003e-12 | 0.999999 | 6.16003e-12 | 0.999999 |
| rad27                         | 5.46832e-12 | 0.999999 | 5.46832e-12 | 0.999999 |
| Phenyl+cycC3H4                | 5.36584e-12 | 0.999999 | 0.000000    | 0.999999 |
| rad59                         | 3.50321e-12 | 0.999999 | 3.50321e-12 | 0.999999 |
| rad46                         | 2.73362e-12 | 0.999999 | 2.73362e-12 | 0.999999 |
| rad43                         | 7.43316e-13 | 0.999999 | 7.43316e-13 | 0.999999 |
| rad18                         | 4.10694e-13 | 0.999999 | 4.10694e-13 | 0.999999 |
| rad62                         | 1.23300e-13 | 0.999999 | 1.23300e-13 | 0.999999 |
| rad50                         | 4.78111e-14 | 0.999999 | 4.78111e-14 | 0.999999 |
| rad20                         | 4.48580e-14 | 0.999999 | 4.48580e-14 | 0.999999 |
| rad25                         | 3.36363e-14 | 0.999999 | 3.36363e-14 | 0.999999 |
| rad21                         | 2.87588e-14 | 0.999999 | 2.87588e-14 | 0.999999 |
| rad54                         | 2.62974e-14 | 0.999999 | 2.62974e-14 | 0.999999 |
| rad33                         | 2.20370e-14 | 0.999999 | 2.20370e-14 | 0.999999 |
| rad70                         | 1.22466e-14 | 0.999999 | 1.22466e-14 | 0.999999 |
| PAH1+H                        | 7.69298e-15 | 0.999999 | 7.69298e-15 | 0.999999 |
| rad58                         | 2.30941e-15 | 0.999999 | 2.30941e-15 | 0.999999 |
| rad52                         | 6.49361e-16 | 0.999999 | 6.49361e-16 | 0.999999 |
| rad55                         | 5.21767e-16 | 0.999999 | 5.21767e-16 | 0.999999 |

|           |             |          |             |          |
|-----------|-------------|----------|-------------|----------|
| rad34     | 5.11271e-16 | 0.999999 | 5.11271e-16 | 0.999999 |
| rad41     | 5.02603e-16 | 0.999999 | 5.02603e-16 | 0.999999 |
| rad51     | 3.88971e-16 | 0.999999 | 3.88971e-16 | 0.999999 |
| rad24     | 2.71772e-16 | 0.999999 | 2.71772e-16 | 0.999999 |
| rad42     | 1.87485e-16 | 0.999999 | 1.87485e-16 | 0.999999 |
| rad31     | 1.55959e-16 | 0.999999 | 1.55959e-16 | 0.999999 |
| rad65     | 1.04629e-17 | 0.999999 | 1.04629e-17 | 0.999999 |
| rad61     | 2.29079e-18 | 0.999999 | 2.29079e-18 | 0.999999 |
| rad53     | 6.99582e-19 | 0.999999 | 6.99582e-19 | 0.999999 |
| rad64     | 1.28008e-19 | 0.999999 | 1.28008e-19 | 0.999999 |
| rad56     | 1.88071e-20 | 0.999999 | 1.88071e-20 | 0.999999 |
| rad68syn  | 1.72634e-20 | 0.999999 | 1.72634e-20 | 0.999999 |
| rad68anti | 1.25776e-20 | 0.999999 | 1.25776e-20 | 0.999999 |
| rad40syn  | 1.56178e-21 | 0.999999 | 1.56178e-21 | 0.999999 |
| rad40anti | 1.37423e-21 | 0.999999 | 1.37423e-21 | 0.999999 |
| PAH8+H    | 4.24086e-22 | 0.999999 | 4.24086e-22 | 0.999999 |
| rad73     | 2.89699e-23 | 0.999999 | 2.89699e-23 | 0.999999 |
| rad47     | 2.61672e-23 | 0.999999 | 2.61672e-23 | 0.999999 |
| rad71     | 5.39540e-25 | 0.999999 | 5.39540e-25 | 0.999999 |
| rad19syn  | 6.96753e-26 | 0.999999 | 6.96753e-26 | 0.999999 |
| rad8      | 7.90457e-46 | 0.999999 | 7.90457e-46 | 0.999999 |

1000.00000 Pa, 300.000000 K

| Rate constant             | True (fraction)        | Effective (fraction)   |
|---------------------------|------------------------|------------------------|
| Total                     | 5.34809e-14 (1.00 )    | 5.34809e-14 (1.00 )    |
| Formation of rad19        | 5.34010e-14 (0.999 )   | 5.34010e-14 (0.999 )   |
| H-abstraction to cyc2enyl | 7.95823e-17 (0.00149 ) | 7.95823e-17 (0.00149 ) |
| H-abstraction to cyclenyl | 3.44981e-19 (6.45e-06) | 3.44981e-19 (6.45e-06) |

| species                       | PYtrue      | Cumul    | PYeffective | Cumul    |
|-------------------------------|-------------|----------|-------------|----------|
| Indene+H                      | 0.547206    | 0.547206 | 0.547206    | 0.547206 |
| rad9                          | 0.450394    | 0.997600 | 0.450394    | 0.997600 |
| Benzene+cycloprop-2-enylidene | 0.00148805  | 0.999088 | 0.00148805  | 0.999088 |
| rad15                         | 0.000648000 | 0.999736 | 0.000648000 | 0.999736 |
| PhCHCCH2+H                    | 0.000231090 | 0.999967 | 0.000231090 | 0.999967 |
| rad6                          | 1.27721e-05 | 0.999980 | 1.27721e-05 | 0.999980 |
| Benzene+cycloprop-1-enylidene | 6.45054e-06 | 0.999986 | 6.45054e-06 | 0.999986 |
| PhCCH+CH3                     | 2.51310e-06 | 0.999989 | 2.51310e-06 | 0.999989 |
| rad2                          | 2.01503e-06 | 0.999991 | 2.01503e-06 | 0.999991 |
| PhCCCH3+H                     | 1.98079e-06 | 0.999993 | 1.98079e-06 | 0.999993 |
| Ph+MeAc                       | 1.88127e-06 | 0.999995 | 1.88127e-06 | 0.999995 |
| C2H2+PhCH2                    | 1.82541e-06 | 0.999996 | 1.82541e-06 | 0.999996 |
| rad26                         | 9.53800e-07 | 0.999997 | 9.53800e-07 | 0.999997 |
| rad67                         | 7.89521e-07 | 0.999998 | 7.89521e-07 | 0.999998 |
| rad35                         | 3.25101e-07 | 0.999999 | 3.25101e-07 | 0.999999 |
| rad10                         | 2.22458e-07 | 0.999999 | 2.22458e-07 | 0.999999 |
| rad23                         | 1.64547e-07 | 0.999999 | 1.64547e-07 | 0.999999 |
| rad1                          | 1.51897e-07 | 0.999999 | 1.51897e-07 | 0.999999 |
| Ph+Allene                     | 4.97739e-08 | 0.999999 | 4.97739e-08 | 0.999999 |
| rad3                          | 2.68975e-08 | 0.999999 | 2.68975e-08 | 0.999999 |
| rad45                         | 2.27614e-08 | 0.999999 | 2.27614e-08 | 0.999999 |
| PhCH2CCH+H                    | 1.66267e-08 | 0.999999 | 1.66267e-08 | 0.999999 |
| rad4                          | 1.33829e-08 | 0.999999 | 1.33829e-08 | 0.999999 |
| rad28                         | 9.30919e-09 | 0.999999 | 9.30919e-09 | 0.999999 |
| rad7                          | 7.08686e-09 | 0.999999 | 7.08686e-09 | 0.999999 |
| rad37                         | 6.24456e-09 | 0.999999 | 6.24456e-09 | 0.999999 |
| rad30                         | 5.83965e-09 | 0.999999 | 5.83965e-09 | 0.999999 |
| rad12                         | 5.63417e-09 | 0.999999 | 5.63417e-09 | 0.999999 |
| rad11                         | 3.46093e-09 | 0.999999 | 3.46093e-09 | 0.999999 |
| rad19anti                     | 2.38622e-09 | 0.999999 | 2.38622e-09 | 0.999999 |
| PAH7+H                        | 9.44373e-10 | 0.999999 | 9.44373e-10 | 0.999999 |
| rad36                         | 7.75879e-10 | 0.999999 | 7.75879e-10 | 0.999999 |
| rad22                         | 6.71522e-10 | 0.999999 | 6.71522e-10 | 0.999999 |
| PhcycC3H3_A+H                 | 3.24163e-10 | 0.999999 | 3.24163e-10 | 0.999999 |
| PAH9+H                        | 2.32913e-10 | 0.999999 | 2.32913e-10 | 0.999999 |
| rad39                         | 2.15699e-10 | 0.999999 | 2.15699e-10 | 0.999999 |
| rad38                         | 1.36389e-10 | 0.999999 | 1.36389e-10 | 0.999999 |
| PAH10+CH3                     | 8.06934e-11 | 0.999999 | 8.06934e-11 | 0.999999 |
| PAH3+H                        | 5.00798e-11 | 0.999999 | 5.00798e-11 | 0.999999 |
| rad60syn                      | 4.81913e-11 | 0.999999 | 4.81913e-11 | 0.999999 |
| rad13                         | 2.78918e-11 | 0.999999 | 2.78918e-11 | 0.999999 |
| rad5                          | 2.72862e-11 | 0.999999 | 2.72862e-11 | 0.999999 |
| rad60anti                     | 2.50711e-11 | 0.999999 | 2.50711e-11 | 0.999999 |
| PhcycC3H3_B+H                 | 1.07164e-11 | 0.999999 | 1.07164e-11 | 0.999999 |
| rad59                         | 8.33647e-12 | 0.999999 | 8.33647e-12 | 0.999999 |
| rad46                         | 8.24913e-12 | 0.999999 | 8.24913e-12 | 0.999999 |
| Phenyl+cycC3H4                | 8.20988e-12 | 0.999999 | 0.00000     | 0.999999 |

|           |             |          |             |          |
|-----------|-------------|----------|-------------|----------|
| rad14     | 5.73519e-12 | 0.999999 | 5.73519e-12 | 0.999999 |
| rad27     | 5.34926e-12 | 0.999999 | 5.34926e-12 | 0.999999 |
| rad43     | 2.52745e-12 | 0.999999 | 2.52745e-12 | 0.999999 |
| rad18     | 5.97594e-13 | 0.999999 | 5.97594e-13 | 0.999999 |
| rad62     | 4.12327e-13 | 0.999999 | 4.12327e-13 | 0.999999 |
| rad54     | 2.63244e-13 | 0.999999 | 2.63244e-13 | 0.999999 |
| rad50     | 2.10612e-13 | 0.999999 | 2.10612e-13 | 0.999999 |
| rad20     | 6.95354e-14 | 0.999999 | 6.95354e-14 | 0.999999 |
| rad70     | 5.41891e-14 | 0.999999 | 5.41891e-14 | 0.999999 |
| rad25     | 4.93408e-14 | 0.999999 | 4.93408e-14 | 0.999999 |
| rad21     | 4.70654e-14 | 0.999999 | 4.70654e-14 | 0.999999 |
| PAH1+H    | 4.04756e-14 | 0.999999 | 4.04756e-14 | 0.999999 |
| rad33     | 3.96694e-14 | 0.999999 | 3.96694e-14 | 0.999999 |
| rad58     | 8.29178e-15 | 0.999999 | 8.29178e-15 | 0.999999 |
| rad55     | 6.18387e-15 | 0.999999 | 6.18387e-15 | 0.999999 |
| rad52     | 3.70166e-15 | 0.999999 | 3.70166e-15 | 0.999999 |
| rad41     | 2.86203e-15 | 0.999999 | 2.86203e-15 | 0.999999 |
| rad34     | 2.84361e-15 | 0.999999 | 2.84361e-15 | 0.999999 |
| rad51     | 2.63605e-15 | 0.999999 | 2.63605e-15 | 0.999999 |
| rad42     | 9.57871e-16 | 0.999999 | 9.57871e-16 | 0.999999 |
| rad31     | 4.58808e-16 | 0.999999 | 4.58808e-16 | 0.999999 |
| rad24     | 3.58437e-16 | 0.999999 | 3.58437e-16 | 0.999999 |
| rad65     | 7.72011e-17 | 0.999999 | 7.72011e-17 | 0.999999 |
| rad61     | 4.57199e-17 | 0.999999 | 4.57199e-17 | 0.999999 |
| rad53     | 2.15303e-17 | 0.999999 | 2.15303e-17 | 0.999999 |
| rad64     | 7.64898e-18 | 0.999999 | 7.64898e-18 | 0.999999 |
| rad56     | 1.40493e-18 | 0.999999 | 1.40493e-18 | 0.999999 |
| rad68syn  | 3.66905e-19 | 0.999999 | 3.66905e-19 | 0.999999 |
| rad68anti | 2.60122e-19 | 0.999999 | 2.60122e-19 | 0.999999 |
| rad40syn  | 4.76084e-20 | 0.999999 | 4.76084e-20 | 0.999999 |
| rad40anti | 3.98710e-20 | 0.999999 | 3.98710e-20 | 0.999999 |
| PAH8+H    | 2.71586e-20 | 0.999999 | 2.71586e-20 | 0.999999 |
| rad19syn  | 1.12445e-20 | 0.999999 | 1.12445e-20 | 0.999999 |
| rad73     | 2.70837e-21 | 0.999999 | 2.70837e-21 | 0.999999 |
| rad47     | 2.12499e-22 | 0.999999 | 2.12499e-22 | 0.999999 |
| rad71     | 1.94711e-22 | 0.999999 | 1.94711e-22 | 0.999999 |
| rad72     | 8.44688e-28 | 0.999999 | 8.44688e-28 | 0.999999 |
| rad8      | 5.13118e-36 | 0.999999 | 5.13118e-36 | 0.999999 |

1000.00000 Pa, 310.000000 K

=====

| Rate constant             | True (fraction)        | Effective (fraction)   |
|---------------------------|------------------------|------------------------|
| Total                     | 5.92544e-14 (1.00 )    | 5.92544e-14 (1.00 )    |
| Formation of rad19        | 5.91462e-14 (0.998 )   | 5.91462e-14 (0.998 )   |
| H-abstraction to cyc2enyl | 1.07628e-16 (0.00182 ) | 1.07628e-16 (0.00182 ) |
| H-abstraction to cyc1enyl | 5.62537e-19 (9.49e-06) | 5.62537e-19 (9.49e-06) |

| species                       | PYtrue      | Cumul    | PYeffective | Cumul    |
|-------------------------------|-------------|----------|-------------|----------|
| rad9                          | 0.502359    | 0.502359 | 0.502359    | 0.502359 |
| Indene+H                      | 0.494886    | 0.997245 | 0.494886    | 0.997245 |
| Benzene+cycloprop-2-enylidene | 0.00181637  | 0.999061 | 0.00181637  | 0.999061 |
| rad15                         | 0.000711536 | 0.999773 | 0.000711536 | 0.999773 |
| PhCHCCH2+H                    | 0.000197464 | 0.999970 | 0.000197464 | 0.999970 |
| rad6                          | 1.00114e-05 | 0.999980 | 1.00114e-05 | 0.999980 |
| Benzene+cycloprop-1-enylidene | 9.49359e-06 | 0.999990 | 9.49359e-06 | 0.999990 |
| rad2                          | 2.16115e-06 | 0.999992 | 2.16115e-06 | 0.999992 |
| PhCCH+CH3                     | 1.77670e-06 | 0.999994 | 1.77670e-06 | 0.999994 |
| PhCCCH3+H                     | 1.42656e-06 | 0.999995 | 1.42656e-06 | 0.999995 |
| Ph+MeAc                       | 1.31316e-06 | 0.999996 | 1.31316e-06 | 0.999996 |
| C2H2+PhCH2                    | 1.31143e-06 | 0.999998 | 1.31143e-06 | 0.999998 |
| rad26                         | 8.78667e-07 | 0.999999 | 8.78667e-07 | 0.999999 |
| rad67                         | 6.06848e-07 | 0.999999 | 6.06848e-07 | 0.999999 |
| rad10                         | 2.55584e-07 | 0.999999 | 2.55584e-07 | 0.999999 |
| rad35                         | 2.55074e-07 | 1.000000 | 2.55074e-07 | 1.000000 |
| rad23                         | 1.77512e-07 | 1.000000 | 1.77512e-07 | 1.000000 |
| rad1                          | 1.68125e-07 | 1.000000 | 1.68125e-07 | 1.000000 |
| Ph+Allene                     | 3.83204e-08 | 1.000000 | 3.83204e-08 | 1.000000 |
| rad3                          | 2.83445e-08 | 1.000000 | 2.83445e-08 | 1.000000 |
| rad45                         | 2.19119e-08 | 1.000000 | 2.19119e-08 | 1.000000 |
| rad4                          | 1.51536e-08 | 1.000000 | 1.51536e-08 | 1.000000 |
| PhCH2CCH+H                    | 9.92384e-09 | 1.000000 | 9.92384e-09 | 1.000000 |
| rad7                          | 5.70105e-09 | 1.000000 | 5.70105e-09 | 1.000000 |
| rad28                         | 5.45592e-09 | 1.000000 | 5.45592e-09 | 1.000000 |
| rad30                         | 4.67926e-09 | 1.000000 | 4.67926e-09 | 1.000000 |
| rad12                         | 4.09080e-09 | 1.000000 | 4.09080e-09 | 1.000000 |
| rad37                         | 3.16800e-09 | 1.000000 | 3.16800e-09 | 1.000000 |
| rad11                         | 3.08021e-09 | 1.000000 | 3.08021e-09 | 1.000000 |
| rad19anti                     | 2.55566e-09 | 1.000000 | 2.55566e-09 | 1.000000 |



|                |             |         |             |         |
|----------------|-------------|---------|-------------|---------|
| rad36          | 1.45301e-09 | 1.00000 | 1.45301e-09 | 1.00000 |
| rad22          | 6.16759e-10 | 1.00000 | 6.16759e-10 | 1.00000 |
| PhcycC3H3_A+H  | 4.01962e-10 | 1.00000 | 4.01962e-10 | 1.00000 |
| PAH7+H         | 2.60371e-10 | 1.00000 | 2.60371e-10 | 1.00000 |
| PAH9+H         | 1.27320e-10 | 1.00000 | 1.27320e-10 | 1.00000 |
| rad38          | 7.55112e-11 | 1.00000 | 7.55112e-11 | 1.00000 |
| rad39          | 6.15820e-11 | 1.00000 | 6.15820e-11 | 1.00000 |
| rad60syn       | 3.59371e-11 | 1.00000 | 3.59371e-11 | 1.00000 |
| PAH3+H         | 3.05508e-11 | 1.00000 | 3.05508e-11 | 1.00000 |
| PAH10+CH3      | 2.94445e-11 | 1.00000 | 2.94445e-11 | 1.00000 |
| rad5           | 2.50227e-11 | 1.00000 | 2.50227e-11 | 1.00000 |
| rad13          | 2.26996e-11 | 1.00000 | 2.26996e-11 | 1.00000 |
| rad60anti      | 1.84869e-11 | 1.00000 | 1.84869e-11 | 1.00000 |
| PhcycC3H3_B+H  | 1.39341e-11 | 1.00000 | 1.39341e-11 | 1.00000 |
| Phenyl+cycC3H4 | 1.07882e-11 | 1.00000 | 0.00000     | 1.00000 |
| rad14          | 6.42799e-12 | 1.00000 | 6.42799e-12 | 1.00000 |
| rad27          | 5.70000e-12 | 1.00000 | 5.70000e-12 | 1.00000 |
| rad59          | 5.57695e-12 | 1.00000 | 5.57695e-12 | 1.00000 |
| rad46          | 4.63469e-12 | 1.00000 | 4.63469e-12 | 1.00000 |
| rad43          | 1.39426e-12 | 1.00000 | 1.39426e-12 | 1.00000 |
| rad18          | 4.11608e-13 | 1.00000 | 4.11608e-13 | 1.00000 |
| rad62          | 2.28589e-13 | 1.00000 | 2.28589e-13 | 1.00000 |
| rad50          | 9.44618e-14 | 1.00000 | 9.44618e-14 | 1.00000 |
| rad54          | 6.53255e-14 | 1.00000 | 6.53255e-14 | 1.00000 |
| rad20          | 5.03903e-14 | 1.00000 | 5.03903e-14 | 1.00000 |
| rad25          | 3.96597e-14 | 1.00000 | 3.96597e-14 | 1.00000 |
| rad21          | 3.22941e-14 | 1.00000 | 3.22941e-14 | 1.00000 |
| rad33          | 2.79120e-14 | 1.00000 | 2.79120e-14 | 1.00000 |
| rad70          | 2.56422e-14 | 1.00000 | 2.56422e-14 | 1.00000 |
| PAH1+H         | 1.98843e-14 | 1.00000 | 1.98843e-14 | 1.00000 |
| rad58          | 4.72704e-15 | 1.00000 | 4.72704e-15 | 1.00000 |
| rad55          | 1.40413e-15 | 1.00000 | 1.40413e-15 | 1.00000 |
| rad52          | 1.40281e-15 | 1.00000 | 1.40281e-15 | 1.00000 |
| rad41          | 1.20178e-15 | 1.00000 | 1.20178e-15 | 1.00000 |
| rad34          | 1.18019e-15 | 1.00000 | 1.18019e-15 | 1.00000 |
| rad51          | 9.15403e-16 | 1.00000 | 9.15403e-16 | 1.00000 |
| rad42          | 4.26791e-16 | 1.00000 | 4.26791e-16 | 1.00000 |
| rad24          | 2.84971e-16 | 1.00000 | 2.84971e-16 | 1.00000 |
| rad31          | 2.19553e-16 | 1.00000 | 2.19553e-16 | 1.00000 |
| rad65          | 2.54025e-17 | 1.00000 | 2.54025e-17 | 1.00000 |
| rad61          | 8.34308e-18 | 1.00000 | 8.34308e-18 | 1.00000 |
| rad53          | 2.46857e-18 | 1.00000 | 2.46857e-18 | 1.00000 |
| rad64          | 5.18589e-19 | 1.00000 | 5.18589e-19 | 1.00000 |
| rad56          | 7.86096e-20 | 1.00000 | 7.86096e-20 | 1.00000 |
| rad68syn       | 6.33855e-20 | 1.00000 | 6.33855e-20 | 1.00000 |
| rad68anti      | 4.59301e-20 | 1.00000 | 4.59301e-20 | 1.00000 |
| rad40syn       | 6.56476e-21 | 1.00000 | 6.56476e-21 | 1.00000 |
| rad40anti      | 5.78448e-21 | 1.00000 | 5.78448e-21 | 1.00000 |
| PAH8+H         | 1.97398e-21 | 1.00000 | 1.97398e-21 | 1.00000 |
| rad73          | 1.29972e-22 | 1.00000 | 1.29972e-22 | 1.00000 |
| rad47          | 4.57054e-23 | 1.00000 | 4.57054e-23 | 1.00000 |
| rad71          | 2.72049e-24 | 1.00000 | 2.72049e-24 | 1.00000 |
| rad19syn       | 1.62439e-24 | 1.00000 | 1.62439e-24 | 1.00000 |
| rad8           | 2.31975e-45 | 1.00000 | 2.31975e-45 | 1.00000 |

1000.00000 Pa, 400.000000 K

| Rate constant             | True (fraction)        | Effective (fraction)   |
|---------------------------|------------------------|------------------------|
| Total                     | 1.29463e-13 (1.00 )    | 1.29463e-13 (1.00 )    |
| Formation of rad19        | 1.28526e-13 (0.993 )   | 1.28526e-13 (0.993 )   |
| H-abstraction to cyc2enyl | 9.19357e-16 (0.00710 ) | 9.19357e-16 (0.00710 ) |
| H-abstraction to cyclenyl | 1.69485e-17 (0.000131) | 1.69485e-17 (0.000131) |

| species                       | PYtrue      | Cumul    | PYeffective | Cumul    |
|-------------------------------|-------------|----------|-------------|----------|
| Indene+H                      | 0.748260    | 0.748260 | 0.748260    | 0.748260 |
| rad9                          | 0.243384    | 0.991644 | 0.243384    | 0.991644 |
| Benzene+cycloprop-2-enylidene | 0.00710133  | 0.998745 | 0.00710133  | 0.998745 |
| PhCHCCH2+H                    | 0.000703864 | 0.999449 | 0.000703864 | 0.999449 |
| rad15                         | 0.000340126 | 0.999789 | 0.000340126 | 0.999789 |
| Benzene+cycloprop-1-enylidene | 0.000130914 | 0.999920 | 0.000130914 | 0.999920 |
| rad6                          | 3.61469e-05 | 0.999956 | 3.61469e-05 | 0.999956 |
| Ph+MeAc                       | 9.30794e-06 | 0.999966 | 9.30794e-06 | 0.999966 |
| PhCCH+CH3                     | 9.18721e-06 | 0.999975 | 9.18721e-06 | 0.999975 |
| PhCCCH3+H                     | 8.28813e-06 | 0.999983 | 8.28813e-06 | 0.999983 |
| C2H2+PhCH2                    | 7.83588e-06 | 0.999991 | 7.83588e-06 | 0.999991 |
| rad67                         | 3.08271e-06 | 0.999994 | 3.08271e-06 | 0.999994 |
| rad2                          | 1.84524e-06 | 0.999996 | 1.84524e-06 | 0.999996 |
| rad26                         | 1.29755e-06 | 0.999997 | 1.29755e-06 | 0.999997 |

|                |             |          |             |          |
|----------------|-------------|----------|-------------|----------|
| rad35          | 1.22523e-06 | 0.999998 | 1.22523e-06 | 0.999998 |
| Ph+Allene      | 5.45005e-07 | 0.999999 | 5.45005e-07 | 0.999999 |
| rad10          | 2.03554e-07 | 0.999999 | 2.03554e-07 | 0.999999 |
| rad23          | 1.96440e-07 | 0.999999 | 1.96440e-07 | 0.999999 |
| PhCH2CCH+H     | 1.83690e-07 | 1.000000 | 1.83690e-07 | 1.000000 |
| rad1           | 1.71778e-07 | 1.000000 | 1.71778e-07 | 1.000000 |
| rad37          | 5.20053e-08 | 1.000000 | 5.20053e-08 | 1.000000 |
| rad28          | 4.92380e-08 | 1.000000 | 4.92380e-08 | 1.000000 |
| rad45          | 3.09182e-08 | 1.000000 | 3.09182e-08 | 1.000000 |
| rad3           | 2.50426e-08 | 1.000000 | 2.50426e-08 | 1.000000 |
| rad30          | 2.36658e-08 | 1.000000 | 2.36658e-08 | 1.000000 |
| PAH7+H         | 2.34117e-08 | 1.000000 | 2.34117e-08 | 1.000000 |
| rad7           | 1.91670e-08 | 1.000000 | 1.91670e-08 | 1.000000 |
| rad4           | 1.31938e-08 | 1.000000 | 1.31938e-08 | 1.000000 |
| rad11          | 8.63189e-09 | 1.000000 | 8.63189e-09 | 1.000000 |
| rad39          | 5.48811e-09 | 1.000000 | 5.48811e-09 | 1.000000 |
| PhcycC3H3_A+H  | 4.92600e-09 | 1.000000 | 4.92600e-09 | 1.000000 |
| rad12          | 4.81490e-09 | 1.000000 | 4.81490e-09 | 1.000000 |
| rad19anti      | 4.74287e-09 | 1.000000 | 4.74287e-09 | 1.000000 |
| PAH9+H         | 2.01996e-09 | 1.000000 | 2.01996e-09 | 1.000000 |
| PAH10+CH3      | 1.52245e-09 | 1.000000 | 1.52245e-09 | 1.000000 |
| rad38          | 1.47020e-09 | 1.000000 | 1.47020e-09 | 1.000000 |
| rad36          | 1.18469e-09 | 1.000000 | 1.18469e-09 | 1.000000 |
| rad22          | 8.20757e-10 | 1.000000 | 8.20757e-10 | 1.000000 |
| PAH3+H         | 4.52087e-10 | 1.000000 | 4.52087e-10 | 1.000000 |
| PhcycC3H3_B+H  | 4.24753e-10 | 1.000000 | 4.24753e-10 | 1.000000 |
| rad60syn       | 2.87565e-10 | 1.000000 | 2.87565e-10 | 1.000000 |
| Phenyl+cycC3H4 | 2.22331e-10 | 1.000000 | 0.00000     | 1.000000 |
| rad60anti      | 1.54283e-10 | 1.000000 | 1.54283e-10 | 1.000000 |
| rad46          | 9.21728e-11 | 1.000000 | 9.21728e-11 | 1.000000 |
| rad13          | 7.74647e-11 | 1.000000 | 7.74647e-11 | 1.000000 |
| rad59          | 7.05043e-11 | 1.000000 | 7.05043e-11 | 1.000000 |
| rad43          | 2.96017e-11 | 1.000000 | 2.96017e-11 | 1.000000 |
| rad5           | 1.41349e-11 | 1.000000 | 1.41349e-11 | 1.000000 |
| rad54          | 1.13510e-11 | 1.000000 | 1.13510e-11 | 1.000000 |
| rad14          | 5.22731e-12 | 1.000000 | 5.22731e-12 | 1.000000 |
| rad27          | 4.88292e-12 | 1.000000 | 4.88292e-12 | 1.000000 |
| rad50          | 4.60890e-12 | 1.000000 | 4.60890e-12 | 1.000000 |
| rad62          | 4.52770e-12 | 1.000000 | 4.52770e-12 | 1.000000 |
| PAH1+H         | 1.80250e-12 | 1.000000 | 1.80250e-12 | 1.000000 |
| rad70          | 1.55361e-12 | 1.000000 | 1.55361e-12 | 1.000000 |
| rad18          | 8.36398e-13 | 1.000000 | 8.36398e-13 | 1.000000 |
| rad55          | 3.40551e-13 | 1.000000 | 3.40551e-13 | 1.000000 |
| rad58          | 1.81510e-13 | 1.000000 | 1.81510e-13 | 1.000000 |
| rad20          | 1.63683e-13 | 1.000000 | 1.63683e-13 | 1.000000 |
| rad33          | 1.23249e-13 | 1.000000 | 1.23249e-13 | 1.000000 |
| rad25          | 1.21483e-13 | 1.000000 | 1.21483e-13 | 1.000000 |
| rad51          | 1.17953e-13 | 1.000000 | 1.17953e-13 | 1.000000 |
| rad52          | 1.17125e-13 | 1.000000 | 1.17125e-13 | 1.000000 |
| rad34          | 1.15039e-13 | 1.000000 | 1.15039e-13 | 1.000000 |
| rad21          | 1.12733e-13 | 1.000000 | 1.12733e-13 | 1.000000 |
| rad41          | 7.90778e-14 | 1.000000 | 7.90778e-14 | 1.000000 |
| rad42          | 2.18773e-14 | 1.000000 | 2.18773e-14 | 1.000000 |
| rad31          | 6.54182e-15 | 1.000000 | 6.54182e-15 | 1.000000 |
| rad61          | 5.06050e-15 | 1.000000 | 5.06050e-15 | 1.000000 |
| rad65          | 3.64740e-15 | 1.000000 | 3.64740e-15 | 1.000000 |
| rad53          | 2.88182e-15 | 1.000000 | 2.88182e-15 | 1.000000 |
| rad19syn       | 2.04481e-15 | 1.000000 | 2.04481e-15 | 1.000000 |
| rad64          | 1.22075e-15 | 1.000000 | 1.22075e-15 | 1.000000 |
| rad24          | 6.48704e-16 | 1.000000 | 6.48704e-16 | 1.000000 |
| rad56          | 3.51975e-16 | 1.000000 | 3.51975e-16 | 1.000000 |
| rad68syn       | 7.08891e-17 | 1.000000 | 7.08891e-17 | 1.000000 |
| rad68anti      | 4.92838e-17 | 1.000000 | 4.92838e-17 | 1.000000 |
| PAH8+H         | 1.29753e-17 | 1.000000 | 1.29753e-17 | 1.000000 |
| rad40syn       | 1.22218e-17 | 1.000000 | 1.22218e-17 | 1.000000 |
| rad40anti      | 9.86083e-18 | 1.000000 | 9.86083e-18 | 1.000000 |
| rad73          | 2.92011e-18 | 1.000000 | 2.92011e-18 | 1.000000 |
| rad71          | 6.77305e-19 | 1.000000 | 6.77305e-19 | 1.000000 |
| rad47          | 2.70802e-20 | 1.000000 | 2.70802e-20 | 1.000000 |
| rad72          | 3.64132e-22 | 1.000000 | 3.64132e-22 | 1.000000 |
| rad8           | 4.41200e-33 | 1.000000 | 4.41200e-33 | 1.000000 |

1000.00000 Pa, 500.000000 K

=====

| Rate constant             | True (fraction)        | Effective (fraction)   |
|---------------------------|------------------------|------------------------|
| Total                     | 2.52837e-13 (1.00 )    | 2.52837e-13 (1.00 )    |
| Formation of rad19        | 2.47941e-13 (0.981 )   | 2.47941e-13 (0.981 )   |
| H-abstraction to cyc2enyl | 4.69058e-15 (0.0186 )  | 4.69058e-15 (0.0186 )  |
| H-abstraction to cyclenyl | 2.05381e-16 (0.000812) | 2.05381e-16 (0.000812) |

| species                       | PYtrue      | Cumul    | PYeffective | Cumul    |
|-------------------------------|-------------|----------|-------------|----------|
| Indene+H                      | 0.869997    | 0.869997 | 0.869997    | 0.869997 |
| rad9                          | 0.108410    | 0.978407 | 0.108410    | 0.978407 |
| Benzene+cycloprop-2-enylidene | 0.0185518   | 0.996959 | 0.0185518   | 0.996959 |
| PhCHCCH2+H                    | 0.00186617  | 0.998825 | 0.00186617  | 0.998825 |
| Benzene+cycloprop-1-enylidene | 0.000812306 | 0.999637 | 0.000812306 | 0.999637 |
| rad15                         | 0.000149316 | 0.999786 | 0.000149316 | 0.999786 |
| rad6                          | 7.35416e-05 | 0.999860 | 7.35416e-05 | 0.999860 |
| Ph+MeAc                       | 3.33345e-05 | 0.999893 | 3.33345e-05 | 0.999893 |
| C2H2+PhCH2                    | 3.09040e-05 | 0.999924 | 3.09040e-05 | 0.999924 |
| PhCCH+CH3                     | 2.54806e-05 | 0.999950 | 2.54806e-05 | 0.999950 |
| PhCCCH3+H                     | 2.54405e-05 | 0.999975 | 2.54405e-05 | 0.999975 |
| rad67                         | 1.02360e-05 | 0.999985 | 1.02360e-05 | 0.999985 |
| Ph+Allene                     | 5.10356e-06 | 0.999991 | 5.10356e-06 | 0.999991 |
| rad35                         | 3.94887e-06 | 0.999994 | 3.94887e-06 | 0.999994 |
| PhCH2CCH+H                    | 1.70562e-06 | 0.999996 | 1.70562e-06 | 0.999996 |
| rad2                          | 1.35202e-06 | 0.999998 | 1.35202e-06 | 0.999998 |
| rad26                         | 9.75270e-07 | 0.999999 | 9.75270e-07 | 0.999999 |
| rad23                         | 3.36756e-07 | 0.999999 | 3.36756e-07 | 0.999999 |
| PAH7+H                        | 2.77787e-07 | 0.999999 | 2.77787e-07 | 0.999999 |
| rad37                         | 2.70656e-07 | 0.999999 | 2.70656e-07 | 0.999999 |
| rad1                          | 1.61489e-07 | 1.000000 | 1.61489e-07 | 1.000000 |
| rad19anti                     | 1.49861e-07 | 1.000000 | 1.49861e-07 | 1.000000 |
| rad10                         | 1.33959e-07 | 1.000000 | 1.33959e-07 | 1.000000 |
| rad28                         | 1.31432e-07 | 1.000000 | 1.31432e-07 | 1.000000 |
| rad30                         | 8.41336e-08 | 1.000000 | 8.41336e-08 | 1.000000 |
| rad45                         | 8.05678e-08 | 1.000000 | 8.05678e-08 | 1.000000 |
| rad39                         | 6.41263e-08 | 1.000000 | 6.41263e-08 | 1.000000 |
| PhcycC3H3_A+H                 | 5.31007e-08 | 1.000000 | 5.31007e-08 | 1.000000 |
| rad7                          | 3.80769e-08 | 1.000000 | 3.80769e-08 | 1.000000 |
| rad3                          | 2.04736e-08 | 1.000000 | 2.04736e-08 | 1.000000 |
| rad11                         | 1.69353e-08 | 1.000000 | 1.69353e-08 | 1.000000 |
| PAH10+CH3                     | 1.68782e-08 | 1.000000 | 1.68782e-08 | 1.000000 |
| PAH9+H                        | 1.52316e-08 | 1.000000 | 1.52316e-08 | 1.000000 |
| rad38                         | 1.17422e-08 | 1.000000 | 1.17422e-08 | 1.000000 |
| rad4                          | 1.15294e-08 | 1.000000 | 1.15294e-08 | 1.000000 |
| PhcycC3H3_B+H                 | 9.11599e-09 | 1.000000 | 9.11599e-09 | 1.000000 |
| rad12                         | 5.42081e-09 | 1.000000 | 5.42081e-09 | 1.000000 |
| rad36                         | 3.74767e-09 | 1.000000 | 3.74767e-09 | 1.000000 |
| Phenyl+cycC3H4                | 3.55696e-09 | 1.000000 | 0.000000    | 1.000000 |
| PAH3+H                        | 3.39396e-09 | 1.000000 | 3.39396e-09 | 1.000000 |
| rad60syn                      | 1.47565e-09 | 1.000000 | 1.47565e-09 | 1.000000 |
| rad22                         | 1.30524e-09 | 1.000000 | 1.30524e-09 | 1.000000 |
| rad46                         | 9.04237e-10 | 1.000000 | 9.04237e-10 | 1.000000 |
| rad60anti                     | 8.14245e-10 | 1.000000 | 8.14245e-10 | 1.000000 |
| rad59                         | 4.94304e-10 | 1.000000 | 4.94304e-10 | 1.000000 |
| rad54                         | 2.55325e-10 | 1.000000 | 2.55325e-10 | 1.000000 |
| rad43                         | 2.29863e-10 | 1.000000 | 2.29863e-10 | 1.000000 |
| rad13                         | 1.67509e-10 | 1.000000 | 1.67509e-10 | 1.000000 |
| rad50                         | 9.44936e-11 | 1.000000 | 9.44936e-11 | 1.000000 |
| PAH1+H                        | 4.56323e-11 | 1.000000 | 4.56323e-11 | 1.000000 |
| rad62                         | 3.39777e-11 | 1.000000 | 3.39777e-11 | 1.000000 |
| rad70                         | 3.07287e-11 | 1.000000 | 3.07287e-11 | 1.000000 |
| rad19syn                      | 1.46005e-11 | 1.000000 | 1.46005e-11 | 1.000000 |
| rad55                         | 9.31139e-12 | 1.000000 | 9.31139e-12 | 1.000000 |
| rad5                          | 5.87912e-12 | 1.000000 | 5.87912e-12 | 1.000000 |
| rad51                         | 5.82647e-12 | 1.000000 | 5.82647e-12 | 1.000000 |
| rad14                         | 3.67729e-12 | 1.000000 | 3.67729e-12 | 1.000000 |
| rad52                         | 3.67281e-12 | 1.000000 | 3.67281e-12 | 1.000000 |
| rad27                         | 3.39537e-12 | 1.000000 | 3.39537e-12 | 1.000000 |
| rad34                         | 3.00870e-12 | 1.000000 | 3.00870e-12 | 1.000000 |
| rad58                         | 2.90281e-12 | 1.000000 | 2.90281e-12 | 1.000000 |
| rad18                         | 1.47442e-12 | 1.000000 | 1.47442e-12 | 1.000000 |
| rad41                         | 1.28482e-12 | 1.000000 | 1.28482e-12 | 1.000000 |
| rad20                         | 4.17180e-13 | 1.000000 | 4.17180e-13 | 1.000000 |
| rad61                         | 3.30498e-13 | 1.000000 | 3.30498e-13 | 1.000000 |
| rad33                         | 3.27252e-13 | 1.000000 | 3.27252e-13 | 1.000000 |
| rad42                         | 3.04142e-13 | 1.000000 | 3.04142e-13 | 1.000000 |
| rad21                         | 3.00247e-13 | 1.000000 | 3.00247e-13 | 1.000000 |
| rad25                         | 2.59029e-13 | 1.000000 | 2.59029e-13 | 1.000000 |
| rad31                         | 2.26983e-13 | 1.000000 | 2.26983e-13 | 1.000000 |
| rad53                         | 1.81601e-13 | 1.000000 | 1.81601e-13 | 1.000000 |
| rad65                         | 1.78539e-13 | 1.000000 | 1.78539e-13 | 1.000000 |
| rad64                         | 7.78480e-14 | 1.000000 | 7.78480e-14 | 1.000000 |
| rad56                         | 4.82137e-14 | 1.000000 | 4.82137e-14 | 1.000000 |
| PAH8+H                        | 1.06079e-14 | 1.000000 | 1.06079e-14 | 1.000000 |
| rad68syn                      | 9.23508e-15 | 1.000000 | 9.23508e-15 | 1.000000 |
| rad73                         | 8.61837e-15 | 1.000000 | 8.61837e-15 | 1.000000 |

|           |             |         |             |         |
|-----------|-------------|---------|-------------|---------|
| rad71     | 7.01333e-15 | 1.00000 | 7.01333e-15 | 1.00000 |
| rad68anti | 6.23112e-15 | 1.00000 | 6.23112e-15 | 1.00000 |
| rad40syn  | 3.04923e-15 | 1.00000 | 3.04923e-15 | 1.00000 |
| rad24     | 2.64289e-15 | 1.00000 | 2.64289e-15 | 1.00000 |
| rad40anti | 2.34567e-15 | 1.00000 | 2.34567e-15 | 1.00000 |
| rad72     | 8.67815e-17 | 1.00000 | 8.67815e-17 | 1.00000 |
| rad47     | 5.17283e-18 | 1.00000 | 5.17283e-18 | 1.00000 |
| rad8      | 7.40459e-29 | 1.00000 | 7.40459e-29 | 1.00000 |

1000.00000 Pa, 600.000000 K

| Rate constant             | True (fraction)        | Effective (fraction)   |
|---------------------------|------------------------|------------------------|
| Total                     | 4.35570e-13 (1.00 )    | 4.35570e-13 (1.00 )    |
| Formation of rad19        | 4.18892e-13 (0.962 )   | 4.18892e-13 (0.962 )   |
| H-abstraction to cyc2enyl | 1.54751e-14 (0.0355 )  | 1.54751e-14 (0.0355 )  |
| H-abstraction to cyclenyl | 1.20343e-15 (0.00276 ) | 1.20343e-15 (0.00276 ) |

| species                       | PYtrue      | Cumul    | PYeffective | Cumul    |
|-------------------------------|-------------|----------|-------------|----------|
| Indene+H                      | 0.908945    | 0.908945 | 0.908945    | 0.908945 |
| rad9                          | 0.0478824   | 0.956828 | 0.0478824   | 0.956828 |
| Benzene+cycloprop-2-enylidene | 0.0355285   | 0.992356 | 0.0355285   | 0.992356 |
| PhCHCCH2+H                    | 0.00431645  | 0.996673 | 0.00431645  | 0.996673 |
| Benzene+cycloprop-1-enylidene | 0.00276289  | 0.999436 | 0.00276289  | 0.999436 |
| C2H2+PhCH2                    | 9.97359e-05 | 0.999535 | 9.97359e-05 | 0.999535 |
| rad6                          | 9.52876e-05 | 0.999631 | 9.52876e-05 | 0.999631 |
| Ph+MeAc                       | 9.47424e-05 | 0.999725 | 9.47424e-05 | 0.999725 |
| PhCCCH3+H                     | 6.29582e-05 | 0.999788 | 6.29582e-05 | 0.999788 |
| rad15                         | 6.24879e-05 | 0.999851 | 6.24879e-05 | 0.999851 |
| PhCCH+CH3                     | 5.96400e-05 | 0.999911 | 5.96400e-05 | 0.999911 |
| Ph+Allene                     | 3.10085e-05 | 0.999942 | 3.10085e-05 | 0.999942 |
| rad67                         | 2.88134e-05 | 0.999970 | 2.88135e-05 | 0.999970 |
| rad35                         | 1.08572e-05 | 0.999981 | 1.08572e-05 | 0.999981 |
| PhCH2CCH+H                    | 1.08248e-05 | 0.999992 | 1.08248e-05 | 0.999992 |
| PAH7+H                        | 1.63754e-06 | 0.999994 | 1.63754e-06 | 0.999994 |
| rad2                          | 1.21292e-06 | 0.999995 | 1.21292e-06 | 0.999995 |
| rad37                         | 1.02723e-06 | 0.999996 | 1.02723e-06 | 0.999996 |
| rad19anti                     | 6.72837e-07 | 0.999997 | 6.72837e-07 | 0.999997 |
| rad23                         | 6.37928e-07 | 0.999997 | 6.37928e-07 | 0.999997 |
| PhcycC3H3_A+H                 | 5.34282e-07 | 0.999998 | 5.34282e-07 | 0.999998 |
| rad26                         | 4.81024e-07 | 0.999998 | 4.81025e-07 | 0.999998 |
| rad39                         | 3.66348e-07 | 0.999999 | 3.66348e-07 | 0.999999 |
| rad30                         | 2.58674e-07 | 0.999999 | 2.58674e-07 | 0.999999 |
| PhcycC3H3_B+H                 | 2.49300e-07 | 0.999999 | 2.49300e-07 | 0.999999 |
| rad45                         | 2.21315e-07 | 0.999999 | 2.21315e-07 | 0.999999 |
| rad28                         | 1.85947e-07 | 1.000000 | 1.85947e-07 | 1.000000 |
| rad1                          | 1.79703e-07 | 1.000000 | 1.79703e-07 | 1.000000 |
| PAH10+CH3                     | 1.37363e-07 | 1.000000 | 1.37363e-07 | 1.000000 |
| PAH9+H                        | 9.88511e-08 | 1.000000 | 9.88511e-08 | 1.000000 |
| rad38                         | 7.45737e-08 | 1.000000 | 7.45737e-08 | 1.000000 |
| rad10                         | 7.35363e-08 | 1.000000 | 7.35363e-08 | 1.000000 |
| rad7                          | 4.92117e-08 | 1.000000 | 4.92117e-08 | 1.000000 |
| Phenyl+cycC3H4                | 3.58721e-08 | 1.000000 | 0.000000    | 1.000000 |
| PAH3+H                        | 2.26189e-08 | 1.000000 | 2.26189e-08 | 1.000000 |
| rad11                         | 2.21371e-08 | 1.000000 | 2.21371e-08 | 1.000000 |
| rad3                          | 1.84044e-08 | 1.000000 | 1.84044e-08 | 1.000000 |
| rad36                         | 1.32060e-08 | 1.000000 | 1.32060e-08 | 1.000000 |
| rad12                         | 1.28225e-08 | 1.000000 | 1.28225e-08 | 1.000000 |
| rad4                          | 1.12290e-08 | 1.000000 | 1.12290e-08 | 1.000000 |
| rad46                         | 8.24898e-09 | 1.000000 | 8.24898e-09 | 1.000000 |
| rad60syn                      | 6.49250e-09 | 1.000000 | 6.49251e-09 | 1.000000 |
| rad60anti                     | 3.68333e-09 | 1.000000 | 3.68333e-09 | 1.000000 |
| rad59                         | 2.99079e-09 | 1.000000 | 2.99079e-09 | 1.000000 |
| rad54                         | 2.88158e-09 | 1.000000 | 2.88158e-09 | 1.000000 |
| rad50                         | 2.62826e-09 | 1.000000 | 2.62826e-09 | 1.000000 |
| rad22                         | 1.90716e-09 | 1.000000 | 1.90716e-09 | 1.000000 |
| rad19syn                      | 1.52303e-09 | 1.000000 | 1.52303e-09 | 1.000000 |
| rad43                         | 1.35168e-09 | 1.000000 | 1.35168e-09 | 1.000000 |
| PAH1+H                        | 8.27068e-10 | 1.000000 | 8.27068e-10 | 1.000000 |
| rad51                         | 4.98434e-10 | 1.000000 | 4.98434e-10 | 1.000000 |
| rad70                         | 3.97733e-10 | 1.000000 | 3.97733e-10 | 1.000000 |
| rad13                         | 2.62155e-10 | 1.000000 | 2.62155e-10 | 1.000000 |
| rad62                         | 1.90403e-10 | 1.000000 | 1.90403e-10 | 1.000000 |
| rad52                         | 1.78523e-10 | 1.000000 | 1.78523e-10 | 1.000000 |
| rad55                         | 1.25917e-10 | 1.000000 | 1.25917e-10 | 1.000000 |
| rad34                         | 5.46003e-11 | 1.000000 | 5.46003e-11 | 1.000000 |
| rad58                         | 5.33543e-11 | 1.000000 | 5.33543e-11 | 1.000000 |
| rad61                         | 2.51870e-11 | 1.000000 | 2.51870e-11 | 1.000000 |
| rad41                         | 1.73597e-11 | 1.000000 | 1.73597e-11 | 1.000000 |

|           |             |         |             |         |
|-----------|-------------|---------|-------------|---------|
| rad65     | 1.40211e-11 | 1.00000 | 1.40211e-11 | 1.00000 |
| rad71     | 9.78269e-12 | 1.00000 | 9.78269e-12 | 1.00000 |
| rad73     | 7.64260e-12 | 1.00000 | 7.64260e-12 | 1.00000 |
| rad53     | 6.42215e-12 | 1.00000 | 6.42215e-12 | 1.00000 |
| PAH8+H    | 4.71740e-12 | 1.00000 | 4.71740e-12 | 1.00000 |
| rad56     | 3.89102e-12 | 1.00000 | 3.89102e-12 | 1.00000 |
| rad31     | 3.07987e-12 | 1.00000 | 3.07987e-12 | 1.00000 |
| rad42     | 3.02429e-12 | 1.00000 | 3.02429e-12 | 1.00000 |
| rad64     | 2.67940e-12 | 1.00000 | 2.67940e-12 | 1.00000 |
| rad14     | 2.51514e-12 | 1.00000 | 2.51514e-12 | 1.00000 |
| rad5      | 2.37699e-12 | 1.00000 | 2.37699e-12 | 1.00000 |
| rad27     | 2.30307e-12 | 1.00000 | 2.30307e-12 | 1.00000 |
| rad18     | 2.26262e-12 | 1.00000 | 2.26262e-12 | 1.00000 |
| rad68syn  | 1.17990e-12 | 1.00000 | 1.17990e-12 | 1.00000 |
| rad20     | 1.07550e-12 | 1.00000 | 1.07550e-12 | 1.00000 |
| rad21     | 8.48605e-13 | 1.00000 | 8.48605e-13 | 1.00000 |
| rad40syn  | 7.88710e-13 | 1.00000 | 7.88710e-13 | 1.00000 |
| rad68anti | 7.73782e-13 | 1.00000 | 7.73782e-13 | 1.00000 |
| rad33     | 7.39481e-13 | 1.00000 | 7.39481e-13 | 1.00000 |
| rad40anti | 6.24293e-13 | 1.00000 | 6.24293e-13 | 1.00000 |
| rad25     | 4.18904e-13 | 1.00000 | 4.18904e-13 | 1.00000 |
| rad72     | 2.82064e-13 | 1.00000 | 2.82064e-13 | 1.00000 |
| rad24     | 1.99621e-14 | 1.00000 | 1.99621e-14 | 1.00000 |
| rad47     | 5.52874e-16 | 1.00000 | 5.52874e-16 | 1.00000 |
| rad8      | 2.10855e-24 | 1.00000 | 2.10855e-24 | 1.00000 |

1000.00000 Pa, 700.000000 K

=====

| Rate constant             | True (fraction)        | Effective (fraction)   |
|---------------------------|------------------------|------------------------|
| Total                     | 6.91694e-13 (1.00 )    | 6.91694e-13 (1.00 )    |
| Formation of rad19        | 6.47922e-13 (0.937 )   | 6.47922e-13 (0.937 )   |
| H-abstraction to cyc2enyl | 3.91858e-14 (0.0567 )  | 3.91858e-14 (0.0567 )  |
| H-abstraction to cyclenyl | 4.58543e-15 (0.00663 ) | 4.58542e-15 (0.00663 ) |

| species                       | PYtrue      | Cumul    | PYeffective | Cumul    |
|-------------------------------|-------------|----------|-------------|----------|
| Indene+H                      | 0.899417    | 0.899417 | 0.899418    | 0.899418 |
| Benzene+cycloprop-2-enylidene | 0.0566520   | 0.956069 | 0.0566520   | 0.956070 |
| rad9                          | 0.0270165   | 0.983085 | 0.0270165   | 0.983086 |
| PhCHCCH2+H                    | 0.00914274  | 0.992228 | 0.00914274  | 0.992229 |
| Benzene+cycloprop-1-enylidene | 0.00662927  | 0.998857 | 0.00662927  | 0.998858 |
| C2H2+PhCH2                    | 0.000254937 | 0.999112 | 0.000254937 | 0.999113 |
| Ph+MeAc                       | 0.000233332 | 0.999345 | 0.000233332 | 0.999346 |
| PhCCCH3+H                     | 0.000137135 | 0.999483 | 0.000137135 | 0.999484 |
| Ph+Allene                     | 0.000123435 | 0.999606 | 0.000123435 | 0.999607 |
| PhCCH+CH3                     | 0.000121180 | 0.999727 | 0.000121180 | 0.999728 |
| rad6                          | 7.93696e-05 | 0.999807 | 7.93696e-05 | 0.999808 |
| rad67                         | 7.25488e-05 | 0.999879 | 7.25488e-05 | 0.999880 |
| PhCH2CCH+H                    | 4.70074e-05 | 0.999926 | 4.70074e-05 | 0.999927 |
| rad35                         | 2.68517e-05 | 0.999953 | 2.68517e-05 | 0.999954 |
| rad15                         | 2.42608e-05 | 0.999977 | 2.42608e-05 | 0.999978 |
| PAH7+H                        | 5.74162e-06 | 0.999983 | 5.74162e-06 | 0.999984 |
| PhcycC3H3_A+H                 | 3.35534e-06 | 0.999986 | 3.35535e-06 | 0.999987 |
| rad37                         | 3.26198e-06 | 0.999990 | 3.26198e-06 | 0.999991 |
| PhcycC3H3_B+H                 | 2.19104e-06 | 0.999992 | 2.19104e-06 | 0.999993 |
| rad39                         | 1.23179e-06 | 0.999993 | 1.23179e-06 | 0.999994 |
| rad2                          | 1.03128e-06 | 0.999994 | 1.03128e-06 | 0.999995 |
| PAH10+CH3                     | 8.32129e-07 | 0.999995 | 8.32129e-07 | 0.999996 |
| rad19anti                     | 7.82406e-07 | 0.999996 | 7.82406e-07 | 0.999997 |
| rad23                         | 7.36829e-07 | 0.999996 | 7.36829e-07 | 0.999997 |
| rad30                         | 7.15671e-07 | 0.999997 | 7.15671e-07 | 0.999998 |
| PAH9+H                        | 4.97612e-07 | 0.999998 | 4.97612e-07 | 0.999999 |
| rad38                         | 3.73879e-07 | 0.999998 | 3.73879e-07 | 0.999999 |
| rad45                         | 2.85769e-07 | 0.999998 | 2.85769e-07 | 0.999999 |
| Phenyl+cycC3H4                | 2.49579e-07 | 0.999999 | 0.00000     | 0.999999 |
| rad26                         | 1.99832e-07 | 0.999999 | 1.99832e-07 | 0.999999 |
| rad1                          | 1.84505e-07 | 0.999999 | 1.84505e-07 | 1.000000 |
| rad28                         | 1.58668e-07 | 0.999999 | 1.58668e-07 | 1.000000 |
| PAH3+H                        | 1.25785e-07 | 0.999999 | 1.25785e-07 | 1.000000 |
| rad12                         | 8.46524e-08 | 0.999999 | 8.46524e-08 | 1.000000 |
| rad46                         | 5.43613e-08 | 0.999999 | 5.43613e-08 | 1.000000 |
| rad7                          | 4.22433e-08 | 0.999999 | 4.22433e-08 | 1.000000 |
| rad10                         | 3.93055e-08 | 0.999999 | 3.93055e-08 | 1.000000 |
| rad50                         | 3.10402e-08 | 0.999999 | 3.10402e-08 | 1.000000 |
| rad60syn                      | 2.52774e-08 | 0.999999 | 2.52774e-08 | 1.000000 |
| rad36                         | 2.18434e-08 | 1.000000 | 2.18434e-08 | 1.000000 |
| rad11                         | 1.98215e-08 | 1.000000 | 1.98215e-08 | 1.000000 |
| rad54                         | 1.84154e-08 | 1.000000 | 1.84154e-08 | 1.000000 |
| rad59                         | 1.53010e-08 | 1.000000 | 1.53010e-08 | 1.000000 |

|           |             |          |             |          |
|-----------|-------------|----------|-------------|----------|
| rad60anti | 1.47070e-08 | 1.000000 | 1.47070e-08 | 1.000000 |
| rad3      | 1.27252e-08 | 1.000000 | 1.27252e-08 | 1.000000 |
| rad19syn  | 8.87901e-09 | 1.000000 | 8.87901e-09 | 1.000000 |
| rad4      | 8.55022e-09 | 1.000000 | 8.55022e-09 | 1.000000 |
| rad51     | 7.91747e-09 | 1.000000 | 7.91747e-09 | 1.000000 |
| PAH1+H    | 7.35082e-09 | 1.000000 | 7.35083e-09 | 1.000000 |
| rad43     | 6.42147e-09 | 1.000000 | 6.42148e-09 | 1.000000 |
| rad70     | 2.96873e-09 | 1.000000 | 2.96873e-09 | 1.000000 |
| rad52     | 2.48051e-09 | 1.000000 | 2.48052e-09 | 1.000000 |
| rad22     | 1.92307e-09 | 1.000000 | 1.92307e-09 | 1.000000 |
| rad55     | 9.15886e-10 | 1.000000 | 9.15886e-10 | 1.000000 |
| rad62     | 8.22236e-10 | 1.000000 | 8.22237e-10 | 1.000000 |
| rad58     | 4.89781e-10 | 1.000000 | 4.89781e-10 | 1.000000 |
| rad34     | 4.80809e-10 | 1.000000 | 4.80809e-10 | 1.000000 |
| rad13     | 3.29189e-10 | 1.000000 | 3.29189e-10 | 1.000000 |
| rad61     | 2.80464e-10 | 1.000000 | 2.80464e-10 | 1.000000 |
| rad71     | 2.40087e-10 | 1.000000 | 2.40087e-10 | 1.000000 |
| rad65     | 2.15010e-10 | 1.000000 | 2.15010e-10 | 1.000000 |
| rad73     | 1.75525e-10 | 1.000000 | 1.75525e-10 | 1.000000 |
| rad41     | 1.41519e-10 | 1.000000 | 1.41519e-10 | 1.000000 |
| rad53     | 6.78705e-11 | 1.000000 | 6.78705e-11 | 1.000000 |
| PAH8+H    | 6.21330e-11 | 1.000000 | 6.21331e-11 | 1.000000 |
| rad56     | 4.41102e-11 | 1.000000 | 4.41103e-11 | 1.000000 |
| rad64     | 3.02973e-11 | 1.000000 | 3.02973e-11 | 1.000000 |
| rad42     | 2.03171e-11 | 1.000000 | 2.03171e-11 | 1.000000 |
| rad68syn  | 1.40787e-11 | 1.000000 | 1.40787e-11 | 1.000000 |
| rad40syn  | 1.00836e-11 | 1.000000 | 1.00836e-11 | 1.000000 |
| rad31     | 9.57476e-12 | 1.000000 | 9.57476e-12 | 1.000000 |
| rad68anti | 9.21942e-12 | 1.000000 | 9.21942e-12 | 1.000000 |
| rad40anti | 8.06905e-12 | 1.000000 | 8.06905e-12 | 1.000000 |
| rad72     | 7.76685e-12 | 1.000000 | 7.76686e-12 | 1.000000 |
| rad20     | 3.38703e-12 | 1.000000 | 3.38703e-12 | 1.000000 |
| rad18     | 3.24216e-12 | 1.000000 | 3.24216e-12 | 1.000000 |
| rad21     | 3.14537e-12 | 1.000000 | 3.14537e-12 | 1.000000 |
| rad27     | 1.94521e-12 | 1.000000 | 1.94521e-12 | 1.000000 |
| rad14     | 1.78610e-12 | 1.000000 | 1.78610e-12 | 1.000000 |
| rad33     | 1.74487e-12 | 1.000000 | 1.74487e-12 | 1.000000 |
| rad5      | 1.05424e-12 | 1.000000 | 1.05424e-12 | 1.000000 |
| rad25     | 5.74169e-13 | 1.000000 | 5.74169e-13 | 1.000000 |
| rad24     | 1.95870e-13 | 1.000000 | 1.95870e-13 | 1.000000 |
| rad47     | 3.53494e-14 | 1.000000 | 3.53494e-14 | 1.000000 |
| rad8      | 1.66173e-19 | 1.000000 | 1.66173e-19 | 1.000000 |

1000.00000 Pa, 800.000000 K

| Rate constant             | True (fraction)       | Effective (fraction)  |
|---------------------------|-----------------------|-----------------------|
| Total                     | 1.03759e-12 (1.00 )   | 1.03758e-12 (1.00 )   |
| Formation of rad19        | 9.41065e-13 (0.907 )  | 9.41063e-13 (0.907 )  |
| H-abstraction to cyc2enyl | 8.32953e-14 (0.0803 ) | 8.32953e-14 (0.0803 ) |
| H-abstraction to cyclenyl | 1.32261e-14 (0.0127 ) | 1.32261e-14 (0.0127 ) |

| species                       | PYtrue      | Cumul    | PYeffective | Cumul    |
|-------------------------------|-------------|----------|-------------|----------|
| Indene+H                      | 0.862334    | 0.862334 | 0.862335    | 0.862335 |
| Benzene+cycloprop-2-enylidene | 0.0802780   | 0.942612 | 0.0802781   | 0.942614 |
| rad9                          | 0.0234409   | 0.966053 | 0.0234409   | 0.966054 |
| PhCHCCH2+H                    | 0.0186899   | 0.984742 | 0.0186899   | 0.984744 |
| Benzene+cycloprop-1-enylidene | 0.0127470   | 0.997489 | 0.0127470   | 0.997491 |
| C2H2+PhCH2                    | 0.000563442 | 0.998053 | 0.000563442 | 0.998055 |
| Ph+MeAc                       | 0.000536115 | 0.998589 | 0.000536116 | 0.998591 |
| Ph+Allene                     | 0.000380161 | 0.998969 | 0.000380162 | 0.998971 |
| PhCCCH3+H                     | 0.000280426 | 0.999250 | 0.000280427 | 0.999251 |
| PhCCH+CH3                     | 0.000220821 | 0.999470 | 0.000220822 | 0.999472 |
| rad67                         | 0.000174862 | 0.999645 | 0.000174862 | 0.999647 |
| PhCH2CCH+H                    | 0.000167058 | 0.999812 | 0.000167058 | 0.999814 |
| rad35                         | 6.38206e-05 | 0.999876 | 6.38207e-05 | 0.999878 |
| rad6                          | 4.96022e-05 | 0.999926 | 4.96023e-05 | 0.999928 |
| PAH7+H                        | 1.47068e-05 | 0.999940 | 1.47069e-05 | 0.999942 |
| rad15                         | 1.16378e-05 | 0.999952 | 1.16378e-05 | 0.999954 |
| PhcycC3H3_A+H                 | 1.15259e-05 | 0.999964 | 1.15260e-05 | 0.999965 |
| rad37                         | 9.63652e-06 | 0.999973 | 9.63652e-06 | 0.999975 |
| PhcycC3H3_B+H                 | 7.03670e-06 | 0.999980 | 7.03671e-06 | 0.999982 |
| PAH10+CH3                     | 4.75831e-06 | 0.999985 | 4.75832e-06 | 0.999987 |
| rad39                         | 2.96055e-06 | 0.999988 | 2.96055e-06 | 0.999990 |
| rad30                         | 1.92636e-06 | 0.999990 | 1.92636e-06 | 0.999992 |
| PAH9+H                        | 1.87600e-06 | 0.999992 | 1.87600e-06 | 0.999994 |
| rad38                         | 1.52977e-06 | 0.999993 | 1.52977e-06 | 0.999995 |
| Phenyl+cycC3H4                | 1.27220e-06 | 0.999995 | 0.00000     | 0.999995 |
| rad12                         | 9.29160e-07 | 0.999996 | 9.29160e-07 | 0.999996 |

|           |             |          |             |          |
|-----------|-------------|----------|-------------|----------|
| PAH3+H    | 6.91401e-07 | 0.999996 | 6.91401e-07 | 0.999997 |
| rad2      | 6.56423e-07 | 0.999997 | 6.56424e-07 | 0.999997 |
| rad19anti | 6.37499e-07 | 0.999997 | 6.37500e-07 | 0.999998 |
| rad23     | 6.33323e-07 | 0.999998 | 6.33324e-07 | 0.999999 |
| rad45     | 2.89870e-07 | 0.999998 | 2.89871e-07 | 0.999999 |
| rad46     | 2.28209e-07 | 0.999999 | 2.28208e-07 | 0.999999 |
| rad50     | 1.46340e-07 | 0.999999 | 1.46340e-07 | 0.999999 |
| rad1      | 1.37756e-07 | 0.999999 | 1.37756e-07 | 1.000000 |
| rad28     | 1.00211e-07 | 0.999999 | 1.00211e-07 | 1.000000 |
| rad60syn  | 9.82236e-08 | 0.999999 | 9.82236e-08 | 1.000000 |
| rad54     | 9.03732e-08 | 0.999999 | 9.03732e-08 | 1.000000 |
| rad26     | 8.42729e-08 | 0.999999 | 8.42730e-08 | 1.000000 |
| rad59     | 7.75369e-08 | 0.999999 | 7.75370e-08 | 1.000000 |
| rad60anti | 5.86457e-08 | 0.999999 | 5.86458e-08 | 1.000000 |
| PAH1+H    | 5.37937e-08 | 0.999999 | 5.37938e-08 | 1.000000 |
| rad51     | 3.73191e-08 | 1.000000 | 3.73191e-08 | 1.000000 |
| rad7      | 2.93848e-08 | 1.000000 | 2.93848e-08 | 1.000000 |
| rad43     | 2.88326e-08 | 1.000000 | 2.88326e-08 | 1.000000 |
| rad36     | 2.63405e-08 | 1.000000 | 2.63405e-08 | 1.000000 |
| rad10     | 2.06708e-08 | 1.000000 | 2.06709e-08 | 1.000000 |
| rad70     | 1.84772e-08 | 1.000000 | 1.84772e-08 | 1.000000 |
| rad11     | 1.53435e-08 | 1.000000 | 1.53436e-08 | 1.000000 |
| rad19syn  | 1.44429e-08 | 1.000000 | 1.44429e-08 | 1.000000 |
| rad52     | 1.17554e-08 | 1.000000 | 1.17554e-08 | 1.000000 |
| rad3      | 7.06100e-09 | 1.000000 | 7.06101e-09 | 1.000000 |
| rad55     | 5.17638e-09 | 1.000000 | 5.17639e-09 | 1.000000 |
| rad4      | 5.12805e-09 | 1.000000 | 5.12805e-09 | 1.000000 |
| rad58     | 3.79671e-09 | 1.000000 | 3.79671e-09 | 1.000000 |
| rad34     | 3.49192e-09 | 1.000000 | 3.49192e-09 | 1.000000 |
| rad62     | 3.05042e-09 | 1.000000 | 3.05043e-09 | 1.000000 |
| rad61     | 2.56764e-09 | 1.000000 | 2.56764e-09 | 1.000000 |
| rad22     | 1.63124e-09 | 1.000000 | 1.63125e-09 | 1.000000 |
| rad71     | 1.08572e-09 | 1.000000 | 1.08573e-09 | 1.000000 |
| rad65     | 1.02697e-09 | 1.000000 | 1.02697e-09 | 1.000000 |
| rad41     | 9.89809e-10 | 1.000000 | 9.89818e-10 | 1.000000 |
| rad73     | 7.96940e-10 | 1.000000 | 7.96941e-10 | 1.000000 |
| rad53     | 5.98164e-10 | 1.000000 | 5.98164e-10 | 1.000000 |
| rad13     | 4.38058e-10 | 1.000000 | 4.38059e-10 | 1.000000 |
| rad56     | 4.27879e-10 | 1.000000 | 4.27880e-10 | 1.000000 |
| PAH8+H    | 4.12746e-10 | 1.000000 | 4.12747e-10 | 1.000000 |
| rad64     | 2.31153e-10 | 1.000000 | 2.31153e-10 | 1.000000 |
| rad68syn  | 1.17519e-10 | 1.000000 | 1.17519e-10 | 1.000000 |
| rad42     | 1.13140e-10 | 1.000000 | 1.13140e-10 | 1.000000 |
| rad68anti | 7.71636e-11 | 1.000000 | 7.71638e-11 | 1.000000 |
| rad40syn  | 7.43716e-11 | 1.000000 | 7.43717e-11 | 1.000000 |
| rad40anti | 5.86454e-11 | 1.000000 | 5.86455e-11 | 1.000000 |
| rad72     | 3.51112e-11 | 1.000000 | 3.51112e-11 | 1.000000 |
| rad21     | 2.22185e-11 | 1.000000 | 2.22185e-11 | 1.000000 |
| rad20     | 1.82261e-11 | 1.000000 | 1.82261e-11 | 1.000000 |
| rad31     | 1.58913e-11 | 1.000000 | 1.58913e-11 | 1.000000 |
| rad18     | 7.13155e-12 | 1.000000 | 7.13156e-12 | 1.000000 |
| rad33     | 6.45849e-12 | 1.000000 | 6.45850e-12 | 1.000000 |
| rad24     | 5.23848e-12 | 1.000000 | 5.23849e-12 | 1.000000 |
| rad27     | 2.14930e-12 | 1.000000 | 2.14929e-12 | 1.000000 |
| rad14     | 1.43709e-12 | 1.000000 | 1.43709e-12 | 1.000000 |
| rad25     | 9.35926e-13 | 1.000000 | 9.35926e-13 | 1.000000 |
| rad5      | 5.37180e-13 | 1.000000 | 5.37180e-13 | 1.000000 |
| rad47     | 3.44075e-13 | 1.000000 | 3.44075e-13 | 1.000000 |
| rad8      | 4.53647e-15 | 1.000000 | 4.53648e-15 | 1.000000 |

1000.00000 Pa, 900.000000 K

=====

| Rate constant             | True (fraction)       | Effective (fraction)  |
|---------------------------|-----------------------|-----------------------|
| Total                     | 1.49199e-12 (1.00 )   | 1.49199e-12 (1.00 )   |
| Formation of rad19        | 1.30395e-12 (0.874 )  | 1.30394e-12 (0.874 )  |
| H-abstraction to cyc2enyl | 1.56554e-13 (0.105 )  | 1.56554e-13 (0.105 )  |
| H-abstraction to cyclenyl | 3.14892e-14 (0.0211 ) | 3.14890e-14 (0.0211 ) |

| species                       | PYtrue      | Cumul    | PYeffective | Cumul    |
|-------------------------------|-------------|----------|-------------|----------|
| Indene+H                      | 0.814085    | 0.814085 | 0.814090    | 0.814090 |
| Benzene+cycloprop-2-enylidene | 0.104929    | 0.919015 | 0.104930    | 0.919020 |
| PhCHCCH2+H                    | 0.0361454   | 0.955160 | 0.0361455   | 0.955166 |
| Benzene+cycloprop-1-enylidene | 0.0211054   | 0.976266 | 0.0211054   | 0.976271 |
| rad9                          | 0.0183468   | 0.994612 | 0.0183469   | 0.994618 |
| C2H2+PhCH2                    | 0.00113559  | 0.995748 | 0.00113559  | 0.995754 |
| Ph+MeAc                       | 0.00112959  | 0.996878 | 0.00112960  | 0.996883 |
| Ph+Allene                     | 0.000944984 | 0.997823 | 0.000944992 | 0.997828 |
| PhCCCH3+H                     | 0.000528581 | 0.998351 | 0.000528584 | 0.998357 |

|                |             |          |             |          |
|----------------|-------------|----------|-------------|----------|
| PhCH2CCH+H     | 0.000506224 | 0.998857 | 0.000506226 | 0.998863 |
| rad67          | 0.000392738 | 0.999250 | 0.000392740 | 0.999256 |
| PhCCH+CH3      | 0.000378752 | 0.999629 | 0.000378754 | 0.999634 |
| rad35          | 0.000142297 | 0.999771 | 0.000142298 | 0.999777 |
| PhcycC3H3_A+H  | 4.33731e-05 | 0.999815 | 4.33733e-05 | 0.999820 |
| PhcycC3H3_B+H  | 3.14219e-05 | 0.999846 | 3.14221e-05 | 0.999852 |
| PAH7+H         | 3.05996e-05 | 0.999877 | 3.05998e-05 | 0.999882 |
| rad6           | 2.53725e-05 | 0.999902 | 2.53727e-05 | 0.999908 |
| rad37          | 2.47528e-05 | 0.999927 | 2.47529e-05 | 0.999932 |
| PAH10+CH3      | 2.38207e-05 | 0.999951 | 2.38209e-05 | 0.999956 |
| PAH9+H         | 7.00991e-06 | 0.999958 | 7.00994e-06 | 0.999963 |
| rad15          | 6.59613e-06 | 0.999964 | 6.59617e-06 | 0.999970 |
| rad38          | 5.84851e-06 | 0.999970 | 5.84854e-06 | 0.999976 |
| rad39          | 5.73656e-06 | 0.999976 | 5.73659e-06 | 0.999981 |
| Phenyl+cycC3H4 | 5.09265e-06 | 0.999981 | 0.00000     | 0.999981 |
| rad30          | 4.94386e-06 | 0.999986 | 4.94389e-06 | 0.999986 |
| PAH3+H         | 3.93718e-06 | 0.999990 | 3.93719e-06 | 0.999990 |
| rad12          | 3.92055e-06 | 0.999994 | 3.92057e-06 | 0.999994 |
| rad46          | 9.79995e-07 | 0.999995 | 9.80003e-07 | 0.999995 |
| rad50          | 8.06056e-07 | 0.999995 | 8.06060e-07 | 0.999996 |
| rad23          | 5.51441e-07 | 0.999996 | 5.51444e-07 | 0.999996 |
| rad19anti      | 4.74683e-07 | 0.999996 | 4.74685e-07 | 0.999997 |
| rad59          | 3.95745e-07 | 0.999997 | 3.95748e-07 | 0.999997 |
| rad2           | 3.88386e-07 | 0.999997 | 3.88388e-07 | 0.999998 |
| rad60syn       | 3.76793e-07 | 0.999998 | 3.76796e-07 | 0.999998 |
| PAH1+H         | 3.73915e-07 | 0.999998 | 3.73917e-07 | 0.999998 |
| rad54          | 3.33283e-07 | 0.999998 | 3.33286e-07 | 0.999999 |
| rad45          | 3.03122e-07 | 0.999999 | 3.03123e-07 | 0.999999 |
| rad60anti      | 2.31359e-07 | 0.999999 | 2.31359e-07 | 0.999999 |
| rad51          | 2.26292e-07 | 0.999999 | 2.26294e-07 | 1.000000 |
| rad43          | 1.21075e-07 | 0.999999 | 1.21076e-07 | 1.000000 |
| rad70          | 1.01931e-07 | 0.999999 | 1.01931e-07 | 1.000000 |
| rad1           | 9.45307e-08 | 0.999999 | 9.45315e-08 | 1.000000 |
| rad52          | 6.83415e-08 | 0.999999 | 6.83419e-08 | 1.000000 |
| rad28          | 5.14998e-08 | 1.000000 | 5.15001e-08 | 1.000000 |
| rad58          | 3.49404e-08 | 1.000000 | 3.49406e-08 | 1.000000 |
| rad26          | 3.45540e-08 | 1.000000 | 3.45543e-08 | 1.000000 |
| rad36          | 2.93857e-08 | 1.000000 | 2.93858e-08 | 1.000000 |
| rad61          | 2.84234e-08 | 1.000000 | 2.84234e-08 | 1.000000 |
| rad34          | 2.37001e-08 | 1.000000 | 2.37003e-08 | 1.000000 |
| rad55          | 2.19394e-08 | 1.000000 | 2.19396e-08 | 1.000000 |
| rad7           | 1.91543e-08 | 1.000000 | 1.91544e-08 | 1.000000 |
| rad19syn       | 1.51735e-08 | 1.000000 | 1.51736e-08 | 1.000000 |
| rad11          | 1.21976e-08 | 1.000000 | 1.21976e-08 | 1.000000 |
| rad10          | 1.17862e-08 | 1.000000 | 1.17863e-08 | 1.000000 |
| rad62          | 9.80047e-09 | 1.000000 | 9.80055e-09 | 1.000000 |
| rad71          | 7.06065e-09 | 1.000000 | 7.06069e-09 | 1.000000 |
| rad41          | 6.93046e-09 | 1.000000 | 6.93050e-09 | 1.000000 |
| PAH8+H         | 6.83401e-09 | 1.000000 | 6.83404e-09 | 1.000000 |
| rad65          | 6.38510e-09 | 1.000000 | 6.38514e-09 | 1.000000 |
| rad73          | 5.18826e-09 | 1.000000 | 5.18829e-09 | 1.000000 |
| rad53          | 4.39819e-09 | 1.000000 | 4.39822e-09 | 1.000000 |
| rad56          | 4.12429e-09 | 1.000000 | 4.12431e-09 | 1.000000 |
| rad3           | 4.11460e-09 | 1.000000 | 4.11463e-09 | 1.000000 |
| rad4           | 3.17556e-09 | 1.000000 | 3.17558e-09 | 1.000000 |
| rad22          | 1.83248e-09 | 1.000000 | 1.83249e-09 | 1.000000 |
| rad64          | 1.62935e-09 | 1.000000 | 1.62936e-09 | 1.000000 |
| rad68syn       | 1.45765e-09 | 1.000000 | 1.45766e-09 | 1.000000 |
| rad40syn       | 1.08555e-09 | 1.000000 | 1.08556e-09 | 1.000000 |
| rad68anti      | 9.50603e-10 | 1.000000 | 9.50603e-10 | 1.000000 |
| rad40anti      | 8.63096e-10 | 1.000000 | 8.63100e-10 | 1.000000 |
| rad13          | 7.22984e-10 | 1.000000 | 7.22988e-10 | 1.000000 |
| rad42          | 5.60485e-10 | 1.000000 | 5.60488e-10 | 1.000000 |
| rad21          | 2.87079e-10 | 1.000000 | 2.87081e-10 | 1.000000 |
| rad72          | 2.25355e-10 | 1.000000 | 2.25356e-10 | 1.000000 |
| rad20          | 1.56671e-10 | 1.000000 | 1.56672e-10 | 1.000000 |
| rad24          | 8.54378e-11 | 1.000000 | 8.54382e-11 | 1.000000 |
| rad33          | 4.31339e-11 | 1.000000 | 4.31342e-11 | 1.000000 |
| rad18          | 3.36186e-11 | 1.000000 | 3.36188e-11 | 1.000000 |
| rad31          | 2.09135e-11 | 1.000000 | 2.09136e-11 | 1.000000 |
| rad8           | 7.75408e-12 | 1.000000 | 7.75412e-12 | 1.000000 |
| rad27          | 3.54673e-12 | 1.000000 | 3.54674e-12 | 1.000000 |
| rad25          | 2.51320e-12 | 1.000000 | 2.51322e-12 | 1.000000 |
| rad47          | 2.49687e-12 | 1.000000 | 2.49687e-12 | 1.000000 |
| rad14          | 1.70180e-12 | 1.000000 | 1.70181e-12 | 1.000000 |
| rad5           | 2.76663e-13 | 1.000000 | 2.76665e-13 | 1.000000 |

1000.00000 Pa, 1000.00000 K

=====

Rate constant | True (fraction) Effective (fraction)



|                           |                       |                       |
|---------------------------|-----------------------|-----------------------|
| Total                     | 2.07591e-12 (1.00 )   | 2.07587e-12 (1.00 )   |
| Formation of rad19        | 1.74189e-12 (0.839 )  | 1.74186e-12 (0.839 )  |
| H-abstraction to cyc2enyl | 2.68753e-13 (0.129 )  | 2.68753e-13 (0.129 )  |
| H-abstraction to cyclenyl | 6.52627e-14 (0.0314 ) | 6.52614e-14 (0.0314 ) |

| species                       | PYtrue      | Cumul    | PYeffective | Cumul    |
|-------------------------------|-------------|----------|-------------|----------|
| Indene+H                      | 0.763226    | 0.763226 | 0.763239    | 0.763239 |
| Benzene+cycloprop-2-enylidene | 0.129463    | 0.892689 | 0.129465    | 0.892704 |
| PhCHCCH2+H                    | 0.0560561   | 0.948745 | 0.0560570   | 0.948761 |
| Benzene+cycloprop-1-enylidene | 0.0314382   | 0.980183 | 0.0314381   | 0.980199 |
| rad9                          | 0.0108697   | 0.991053 | 0.0108698   | 0.991069 |
| Ph+MeAc                       | 0.00182684  | 0.992880 | 0.00182686  | 0.992896 |
| C2H2+PhCH2                    | 0.00180099  | 0.994681 | 0.00180102  | 0.994697 |
| Ph+Allene                     | 0.00162879  | 0.996309 | 0.00162882  | 0.996326 |
| PhCH2CCH+H                    | 0.000972935 | 0.997282 | 0.000972949 | 0.997299 |
| PhCCCH3+H                     | 0.000801145 | 0.998083 | 0.000801159 | 0.998100 |
| rad67                         | 0.000658704 | 0.998742 | 0.000658715 | 0.998759 |
| PhCCH+CH3                     | 0.000555530 | 0.999298 | 0.000555539 | 0.999314 |
| rad35                         | 0.000238300 | 0.999536 | 0.000238304 | 0.999553 |
| PhcycC3H3_A+H                 | 0.000115900 | 0.999652 | 0.000115902 | 0.999668 |
| PhcycC3H3_B+H                 | 9.27968e-05 | 0.999745 | 9.27982e-05 | 0.999761 |
| PAH10+CH3                     | 5.54000e-05 | 0.999800 | 5.54010e-05 | 0.999817 |
| PAH7+H                        | 4.86553e-05 | 0.999849 | 4.86561e-05 | 0.999865 |
| rad37                         | 4.33217e-05 | 0.999892 | 4.33225e-05 | 0.999909 |
| Phenyl+cycC3H4                | 1.68264e-05 | 0.999909 | 0.000000    | 0.999909 |
| PAH9+H                        | 1.55718e-05 | 0.999924 | 1.55720e-05 | 0.999924 |
| rad38                         | 1.27329e-05 | 0.999937 | 1.27331e-05 | 0.999937 |
| rad6                          | 1.23452e-05 | 0.999950 | 1.23454e-05 | 0.999949 |
| PAH3+H                        | 9.97554e-06 | 0.999960 | 9.97568e-06 | 0.999959 |
| rad30                         | 8.92566e-06 | 0.999968 | 8.92581e-06 | 0.999968 |
| rad39                         | 8.84846e-06 | 0.999977 | 8.84861e-06 | 0.999977 |
| rad12                         | 6.60448e-06 | 0.999984 | 6.60459e-06 | 0.999984 |
| rad15                         | 4.26962e-06 | 0.999988 | 4.26969e-06 | 0.999988 |
| rad46                         | 2.34597e-06 | 0.999991 | 2.34601e-06 | 0.999990 |
| rad50                         | 2.24021e-06 | 0.999993 | 2.24025e-06 | 0.999992 |
| PAH1+H                        | 9.95012e-07 | 0.999994 | 9.95026e-07 | 0.999993 |
| rad59                         | 9.60877e-07 | 0.999995 | 9.60891e-07 | 0.999994 |
| rad60syn                      | 8.19236e-07 | 0.999996 | 8.19249e-07 | 0.999995 |
| rad51                         | 6.82352e-07 | 0.999996 | 6.82364e-07 | 0.999996 |
| rad54                         | 6.73980e-07 | 0.999997 | 6.73992e-07 | 0.999997 |
| rad60anti                     | 5.08864e-07 | 0.999997 | 5.08873e-07 | 0.999997 |
| rad23                         | 5.07729e-07 | 0.999998 | 5.07738e-07 | 0.999998 |
| rad19anti                     | 3.52532e-07 | 0.999998 | 3.52538e-07 | 0.999998 |
| rad45                         | 3.16330e-07 | 0.999999 | 3.16335e-07 | 0.999998 |
| rad43                         | 2.69240e-07 | 0.999999 | 2.69245e-07 | 0.999999 |
| rad2                          | 2.66061e-07 | 0.999999 | 2.66066e-07 | 0.999999 |
| rad70                         | 2.49942e-07 | 0.999999 | 2.49946e-07 | 0.999999 |
| rad52                         | 1.97800e-07 | 1.000000 | 1.97804e-07 | 0.999999 |
| rad58                         | 1.03642e-07 | 1.000000 | 1.03644e-07 | 0.999999 |
| rad61                         | 8.66311e-08 | 1.000000 | 8.66325e-08 | 0.999999 |
| rad1                          | 7.02659e-08 | 1.000000 | 7.02671e-08 | 1.000000 |
| rad34                         | 6.26558e-08 | 1.000000 | 6.26569e-08 | 1.000000 |
| rad55                         | 4.69259e-08 | 1.000000 | 4.69267e-08 | 1.000000 |
| rad36                         | 3.07309e-08 | 1.000000 | 3.07314e-08 | 1.000000 |
| rad71                         | 2.54003e-08 | 1.000000 | 2.54007e-08 | 1.000000 |
| rad28                         | 2.52361e-08 | 1.000000 | 2.52366e-08 | 1.000000 |
| PAH8+H                        | 2.47417e-08 | 1.000000 | 2.47421e-08 | 1.000000 |
| rad62                         | 1.94897e-08 | 1.000000 | 1.94900e-08 | 1.000000 |
| rad65                         | 1.91697e-08 | 1.000000 | 1.91701e-08 | 1.000000 |
| rad41                         | 1.85955e-08 | 1.000000 | 1.85958e-08 | 1.000000 |
| rad73                         | 1.80783e-08 | 1.000000 | 1.80787e-08 | 1.000000 |
| rad26                         | 1.60468e-08 | 1.000000 | 1.60470e-08 | 1.000000 |
| rad7                          | 1.49233e-08 | 1.000000 | 1.49236e-08 | 1.000000 |
| rad19syn                      | 1.42444e-08 | 1.000000 | 1.42446e-08 | 1.000000 |
| rad11                         | 1.27171e-08 | 1.000000 | 1.27173e-08 | 1.000000 |
| rad56                         | 1.18791e-08 | 1.000000 | 1.18793e-08 | 1.000000 |
| rad53                         | 1.15536e-08 | 1.000000 | 1.15537e-08 | 1.000000 |
| rad10                         | 9.52654e-09 | 1.000000 | 9.52668e-09 | 1.000000 |
| rad68syn                      | 4.71950e-09 | 1.000000 | 4.71959e-09 | 1.000000 |
| rad64                         | 4.42962e-09 | 1.000000 | 4.42969e-09 | 1.000000 |
| rad22                         | 4.01146e-09 | 1.000000 | 4.01153e-09 | 1.000000 |
| rad40syn                      | 3.74869e-09 | 1.000000 | 3.74876e-09 | 1.000000 |
| rad68anti                     | 3.07058e-09 | 1.000000 | 3.07064e-09 | 1.000000 |
| rad40anti                     | 2.99630e-09 | 1.000000 | 2.99635e-09 | 1.000000 |
| rad21                         | 2.83552e-09 | 1.000000 | 2.83557e-09 | 1.000000 |
| rad3                          | 2.74122e-09 | 1.000000 | 2.74126e-09 | 1.000000 |
| rad4                          | 2.16738e-09 | 1.000000 | 2.16742e-09 | 1.000000 |
| rad13                         | 1.83680e-09 | 1.000000 | 1.83684e-09 | 1.000000 |

|       |             |         |             |          |
|-------|-------------|---------|-------------|----------|
| rad42 | 1.33766e-09 | 1.00000 | 1.33769e-09 | 1.000000 |
| rad20 | 1.15492e-09 | 1.00000 | 1.15494e-09 | 1.000000 |
| rad72 | 8.58667e-10 | 1.00000 | 8.58681e-10 | 1.000000 |
| rad8  | 7.61072e-10 | 1.00000 | 7.61085e-10 | 1.000000 |
| rad24 | 4.02501e-10 | 1.00000 | 4.02509e-10 | 1.000000 |
| rad33 | 2.91445e-10 | 1.00000 | 2.91450e-10 | 1.000000 |
| rad18 | 2.02658e-10 | 1.00000 | 2.02662e-10 | 1.000000 |
| rad31 | 2.43001e-11 | 1.00000 | 2.43006e-11 | 1.000000 |
| rad25 | 1.59185e-11 | 1.00000 | 1.59188e-11 | 1.000000 |
| rad27 | 1.29888e-11 | 1.00000 | 1.29890e-11 | 1.000000 |
| rad47 | 7.77958e-12 | 1.00000 | 7.77972e-12 | 1.000000 |
| rad14 | 3.22424e-12 | 1.00000 | 3.22430e-12 | 1.000000 |
| rad5  | 1.74820e-13 | 1.00000 | 1.74823e-13 | 1.000000 |

1000.00000 Pa, 1100.00000 K

| Rate constant             | True (fraction)       | Effective (fraction)  |
|---------------------------|-----------------------|-----------------------|
| Total                     | 2.81236e-12 (1.00 )   | 2.81222e-12 (1.00 )   |
| Formation of rad19        | 2.25993e-12 (0.804 )  | 2.25980e-12 (0.804 )  |
| H-abstraction to cyc2enyl | 4.30538e-13 (0.153 )  | 4.30538e-13 (0.153 )  |
| H-abstraction to cyclenyl | 1.21896e-13 (0.0433 ) | 1.21889e-13 (0.0433 ) |

| species                       | PYtrue      | Cumul    | PYeffective | Cumul    |
|-------------------------------|-------------|----------|-------------|----------|
| Indene+H                      | 0.715679    | 0.715679 | 0.715714    | 0.715714 |
| Benzene+cycloprop-2-enylidene | 0.153088    | 0.868767 | 0.153095    | 0.868810 |
| PhCHCCH2+H                    | 0.0698586   | 0.938625 | 0.0698621   | 0.938672 |
| Benzene+cycloprop-1-enylidene | 0.0433429   | 0.981968 | 0.0433425   | 0.982014 |
| rad9                          | 0.00656313  | 0.988531 | 0.00656346  | 0.988578 |
| Ph+MeAc                       | 0.00230894  | 0.990840 | 0.00230905  | 0.990887 |
| C2H2+PhCH2                    | 0.00224991  | 0.993090 | 0.00225001  | 0.993137 |
| Ph+Allene                     | 0.00210832  | 0.995199 | 0.00210842  | 0.995245 |
| PhCH2CCH+H                    | 0.00126637  | 0.996465 | 0.00126643  | 0.996512 |
| PhCCCH3+H                     | 0.000994988 | 0.997460 | 0.000995035 | 0.997507 |
| rad67                         | 0.000838589 | 0.998298 | 0.000838630 | 0.998345 |
| PhCCH+CH3                     | 0.000670006 | 0.998968 | 0.000670039 | 0.999015 |
| rad35                         | 0.000302933 | 0.999271 | 0.000302948 | 0.999318 |
| PhcycC3H3_A+H                 | 0.000216808 | 0.999488 | 0.000216819 | 0.999535 |
| PhcycC3H3_B+H                 | 0.000171278 | 0.999659 | 0.000171287 | 0.999706 |
| PAH10+CH3                     | 7.19082e-05 | 0.999731 | 7.19118e-05 | 0.999778 |
| PAH7+H                        | 6.12733e-05 | 0.999793 | 6.12764e-05 | 0.999840 |
| rad37                         | 5.62303e-05 | 0.999849 | 5.62331e-05 | 0.999896 |
| Phenyl+cycC3H4                | 4.74734e-05 | 0.999896 | 0.000000    | 0.999896 |
| PAH9+H                        | 1.98974e-05 | 0.999916 | 1.98984e-05 | 0.999916 |
| rad38                         | 1.64247e-05 | 0.999933 | 1.64255e-05 | 0.999932 |
| PAH3+H                        | 1.28786e-05 | 0.999946 | 1.28793e-05 | 0.999945 |
| rad30                         | 1.14696e-05 | 0.999957 | 1.14701e-05 | 0.999957 |
| rad39                         | 1.09754e-05 | 0.999968 | 1.09759e-05 | 0.999967 |
| rad12                         | 7.33785e-06 | 0.999975 | 7.33822e-06 | 0.999975 |
| rad6                          | 6.35312e-06 | 0.999982 | 6.35344e-06 | 0.999981 |
| rad15                         | 3.87370e-06 | 0.999986 | 3.87390e-06 | 0.999985 |
| rad46                         | 2.98660e-06 | 0.999989 | 2.98675e-06 | 0.999988 |
| rad50                         | 2.84192e-06 | 0.999991 | 2.84205e-06 | 0.999991 |
| PAH1+H                        | 1.28083e-06 | 0.999993 | 1.28090e-06 | 0.999992 |
| rad59                         | 1.24282e-06 | 0.999994 | 1.24288e-06 | 0.999993 |
| rad60syn                      | 1.06238e-06 | 0.999995 | 1.06243e-06 | 0.999994 |
| rad54                         | 8.89969e-07 | 0.999996 | 8.90017e-07 | 0.999995 |
| rad51                         | 8.68924e-07 | 0.999997 | 8.68972e-07 | 0.999996 |
| rad60anti                     | 6.59842e-07 | 0.999997 | 6.59876e-07 | 0.999997 |
| rad23                         | 4.67044e-07 | 0.999998 | 4.67068e-07 | 0.999997 |
| rad43                         | 3.49242e-07 | 0.999998 | 3.49259e-07 | 0.999998 |
| rad70                         | 3.24026e-07 | 0.999999 | 3.24042e-07 | 0.999998 |
| rad45                         | 3.14962e-07 | 0.999999 | 3.14979e-07 | 0.999998 |
| rad19anti                     | 2.63531e-07 | 0.999999 | 2.63544e-07 | 0.999999 |
| rad52                         | 2.51151e-07 | 0.999999 | 2.51163e-07 | 0.999999 |
| rad2                          | 2.00728e-07 | 1.000000 | 2.00739e-07 | 0.999999 |
| rad58                         | 1.33100e-07 | 1.000000 | 1.33107e-07 | 0.999999 |
| rad61                         | 1.10538e-07 | 1.000000 | 1.10544e-07 | 0.999999 |
| rad34                         | 8.08230e-08 | 1.000000 | 8.08271e-08 | 0.999999 |
| rad55                         | 6.17683e-08 | 1.000000 | 6.17714e-08 | 0.999999 |
| rad1                          | 5.42119e-08 | 1.000000 | 5.42146e-08 | 0.999999 |
| rad71                         | 3.35115e-08 | 1.000000 | 3.35132e-08 | 1.000000 |
| PAH8+H                        | 3.20774e-08 | 1.000000 | 3.20791e-08 | 1.000000 |
| rad36                         | 3.04492e-08 | 1.000000 | 3.04507e-08 | 1.000000 |
| rad62                         | 2.54154e-08 | 1.000000 | 2.54167e-08 | 1.000000 |
| rad65                         | 2.43958e-08 | 1.000000 | 2.43970e-08 | 1.000000 |
| rad41                         | 2.38721e-08 | 1.000000 | 2.38733e-08 | 1.000000 |
| rad73                         | 2.36242e-08 | 1.000000 | 2.36254e-08 | 1.000000 |
| rad11                         | 2.01500e-08 | 1.000000 | 2.01510e-08 | 1.000000 |

|           |             |         |             |          |
|-----------|-------------|---------|-------------|----------|
| rad7      | 1.57514e-08 | 1.00000 | 1.57522e-08 | 1.000000 |
| rad56     | 1.51847e-08 | 1.00000 | 1.51855e-08 | 1.000000 |
| rad53     | 1.48781e-08 | 1.00000 | 1.48788e-08 | 1.000000 |
| rad28     | 1.31570e-08 | 1.00000 | 1.31577e-08 | 1.000000 |
| rad19syn  | 1.28392e-08 | 1.00000 | 1.28398e-08 | 1.000000 |
| rad21     | 1.12624e-08 | 1.00000 | 1.12630e-08 | 1.000000 |
| rad10     | 1.09204e-08 | 1.00000 | 1.09210e-08 | 1.000000 |
| rad26     | 9.63697e-09 | 1.00000 | 9.63744e-09 | 1.000000 |
| rad8      | 8.50104e-09 | 1.00000 | 8.50145e-09 | 1.000000 |
| rad22     | 8.22084e-09 | 1.00000 | 8.22124e-09 | 1.000000 |
| rad13     | 6.63470e-09 | 1.00000 | 6.63503e-09 | 1.000000 |
| rad68syn  | 6.06054e-09 | 1.00000 | 6.06084e-09 | 1.000000 |
| rad64     | 5.72946e-09 | 1.00000 | 5.72974e-09 | 1.000000 |
| rad40syn  | 4.83108e-09 | 1.00000 | 4.83132e-09 | 1.000000 |
| rad68anti | 3.94270e-09 | 1.00000 | 3.94289e-09 | 1.000000 |
| rad20     | 3.90533e-09 | 1.00000 | 3.90553e-09 | 1.000000 |
| rad40anti | 3.86306e-09 | 1.00000 | 3.86325e-09 | 1.000000 |
| rad3      | 1.94638e-09 | 1.00000 | 1.94648e-09 | 1.000000 |
| rad42     | 1.73847e-09 | 1.00000 | 1.73856e-09 | 1.000000 |
| rad4      | 1.54811e-09 | 1.00000 | 1.54818e-09 | 1.000000 |
| rad72     | 1.15590e-09 | 1.00000 | 1.15596e-09 | 1.000000 |
| rad33     | 9.25857e-10 | 1.00000 | 9.25904e-10 | 1.000000 |
| rad24     | 8.84288e-10 | 1.00000 | 8.84336e-10 | 1.000000 |
| rad18     | 6.99579e-10 | 1.00000 | 6.99614e-10 | 1.000000 |
| rad25     | 1.04262e-10 | 1.00000 | 1.04267e-10 | 1.000000 |
| rad27     | 6.32995e-11 | 1.00000 | 6.33027e-11 | 1.000000 |
| rad31     | 2.58115e-11 | 1.00000 | 2.58128e-11 | 1.000000 |
| rad47     | 9.56071e-12 | 1.00000 | 9.56118e-12 | 1.000000 |
| rad14     | 8.54757e-12 | 1.00000 | 8.54797e-12 | 1.000000 |
| rad5      | 1.58079e-13 | 1.00000 | 1.58086e-13 | 1.000000 |

1000.00000 Pa, 1200.00000 K

| Rate constant             | True (fraction)       | Effective (fraction)  |
|---------------------------|-----------------------|-----------------------|
| Total                     | 3.72623e-12 (1.00 )   | 3.72576e-12 (1.00 )   |
| Formation of rad19        | 2.86288e-12 (0.768 )  | 2.86245e-12 (0.768 )  |
| H-abstraction to cyc2enyl | 6.53266e-13 (0.175 )  | 6.53266e-13 (0.175 )  |
| H-abstraction to cyc1enyl | 2.10085e-13 (0.0564 ) | 2.10053e-13 (0.0564 ) |

| species                       | PYtrue      | Cumul    | PYeffective | Cumul    |
|-------------------------------|-------------|----------|-------------|----------|
| Indene+H                      | 0.667237    | 0.667237 | 0.667321    | 0.667321 |
| Benzene+cycloprop-2-enylidene | 0.175315    | 0.842552 | 0.175337    | 0.842658 |
| PhCHCCH2+H                    | 0.0828094   | 0.925361 | 0.0828203   | 0.925478 |
| Benzene+cycloprop-1-enylidene | 0.0563801   | 0.981741 | 0.0563786   | 0.981857 |
| rad9                          | 0.00425067  | 0.985992 | 0.00425121  | 0.986108 |
| Ph+MeAc                       | 0.00276409  | 0.988756 | 0.00276444  | 0.988873 |
| C2H2+PhCH2                    | 0.00266232  | 0.991418 | 0.00266266  | 0.991535 |
| Ph+Allene                     | 0.00257716  | 0.993995 | 0.00257749  | 0.994113 |
| PhCH2CCH+H                    | 0.00153038  | 0.995526 | 0.00153057  | 0.995643 |
| PhCCCH3+H                     | 0.00117950  | 0.996705 | 0.00117965  | 0.996823 |
| rad67                         | 0.00100815  | 0.997714 | 0.00100828  | 0.997831 |
| PhCCH+CH3                     | 0.000765006 | 0.998479 | 0.000765102 | 0.998596 |
| PhcycC3H3_A+H                 | 0.000389676 | 0.998868 | 0.000389725 | 0.998986 |
| rad35                         | 0.000363451 | 0.999232 | 0.000363497 | 0.999350 |
| PhcycC3H3_B+H                 | 0.000311550 | 0.999543 | 0.000311589 | 0.999661 |
| Phenyl+cycC3H4                | 0.000117531 | 0.999661 | 0.000000    | 0.999661 |
| PAH10+CH3                     | 8.39557e-05 | 0.999745 | 8.39665e-05 | 0.999745 |
| PAH7+H                        | 7.25448e-05 | 0.999817 | 7.25540e-05 | 0.999818 |
| rad37                         | 6.93463e-05 | 0.999887 | 6.93550e-05 | 0.999887 |
| PAH9+H                        | 2.24648e-05 | 0.999909 | 2.24676e-05 | 0.999910 |
| rad38                         | 1.90724e-05 | 0.999928 | 1.90748e-05 | 0.999929 |
| PAH3+H                        | 1.42622e-05 | 0.999942 | 1.42640e-05 | 0.999943 |
| rad30                         | 1.37793e-05 | 0.999956 | 1.37810e-05 | 0.999957 |
| rad39                         | 1.26760e-05 | 0.999969 | 1.26776e-05 | 0.999969 |
| rad12                         | 6.79437e-06 | 0.999976 | 6.79523e-06 | 0.999976 |
| rad15                         | 4.80408e-06 | 0.999980 | 4.80469e-06 | 0.999981 |
| rad6                          | 3.77568e-06 | 0.999984 | 3.77615e-06 | 0.999985 |
| rad46                         | 3.25687e-06 | 0.999987 | 3.25729e-06 | 0.999988 |
| rad50                         | 2.84745e-06 | 0.999990 | 2.84781e-06 | 0.999991 |
| rad59                         | 1.40226e-06 | 0.999992 | 1.40244e-06 | 0.999992 |
| PAH1+H                        | 1.39659e-06 | 0.999993 | 1.39677e-06 | 0.999994 |
| rad60syn                      | 1.24139e-06 | 0.999994 | 1.24154e-06 | 0.999995 |
| rad54                         | 1.10303e-06 | 0.999995 | 1.10317e-06 | 0.999996 |
| rad51                         | 8.28286e-07 | 0.999996 | 8.28395e-07 | 0.999997 |
| rad60anti                     | 7.68681e-07 | 0.999997 | 7.68776e-07 | 0.999998 |
| rad23                         | 4.31412e-07 | 0.999997 | 4.31466e-07 | 0.999998 |
| rad43                         | 4.08378e-07 | 0.999998 | 4.08429e-07 | 0.999998 |
| rad70                         | 3.67814e-07 | 0.999998 | 3.67860e-07 | 0.999999 |

|           |             |          |             |          |
|-----------|-------------|----------|-------------|----------|
| rad45     | 3.03946e-07 | 0.999999 | 3.03984e-07 | 0.999999 |
| rad52     | 2.45410e-07 | 0.999999 | 2.45441e-07 | 0.999999 |
| rad19anti | 1.99183e-07 | 0.999999 | 1.99208e-07 | 0.999999 |
| rad2      | 1.53955e-07 | 0.999999 | 1.53975e-07 | 1.000000 |
| rad58     | 1.36446e-07 | 0.999999 | 1.36463e-07 | 1.000000 |
| rad61     | 1.11662e-07 | 0.999999 | 1.11676e-07 | 1.000000 |
| rad34     | 8.85141e-08 | 0.999999 | 8.85255e-08 | 1.000000 |
| rad55     | 7.55563e-08 | 1.000000 | 7.55659e-08 | 1.000000 |
| rad11     | 5.12760e-08 | 1.000000 | 5.12825e-08 | 1.000000 |
| rad1      | 4.19018e-08 | 1.000000 | 4.19071e-08 | 1.000000 |
| rad62     | 3.05028e-08 | 1.000000 | 3.05066e-08 | 1.000000 |
| rad71     | 2.95435e-08 | 1.000000 | 2.95472e-08 | 1.000000 |
| PAH8+H    | 2.95021e-08 | 1.000000 | 2.95058e-08 | 1.000000 |
| rad36     | 2.93681e-08 | 1.000000 | 2.93718e-08 | 1.000000 |
| rad8      | 2.68638e-08 | 1.000000 | 2.68671e-08 | 1.000000 |
| rad41     | 2.57866e-08 | 1.000000 | 2.57898e-08 | 1.000000 |
| rad7      | 2.35395e-08 | 1.000000 | 2.35425e-08 | 1.000000 |
| rad65     | 2.34096e-08 | 1.000000 | 2.34126e-08 | 1.000000 |
| rad21     | 2.29738e-08 | 1.000000 | 2.29768e-08 | 1.000000 |
| rad73     | 2.10093e-08 | 1.000000 | 2.10120e-08 | 1.000000 |
| rad13     | 1.73554e-08 | 1.000000 | 1.73576e-08 | 1.000000 |
| rad53     | 1.65799e-08 | 1.000000 | 1.65820e-08 | 1.000000 |
| rad10     | 1.65180e-08 | 1.000000 | 1.65201e-08 | 1.000000 |
| rad56     | 1.59966e-08 | 1.000000 | 1.59987e-08 | 1.000000 |
| rad22     | 1.22192e-08 | 1.000000 | 1.22207e-08 | 1.000000 |
| rad19syn  | 1.13955e-08 | 1.000000 | 1.13970e-08 | 1.000000 |
| rad26     | 8.03324e-09 | 1.000000 | 8.03425e-09 | 1.000000 |
| rad28     | 7.94757e-09 | 1.000000 | 7.94859e-09 | 1.000000 |
| rad20     | 6.98590e-09 | 1.000000 | 6.98678e-09 | 1.000000 |
| rad64     | 6.18926e-09 | 1.000000 | 6.19005e-09 | 1.000000 |
| rad68syn  | 5.92258e-09 | 1.000000 | 5.92332e-09 | 1.000000 |
| rad40syn  | 4.54309e-09 | 1.000000 | 4.54366e-09 | 1.000000 |
| rad68anti | 3.85812e-09 | 1.000000 | 3.85860e-09 | 1.000000 |
| rad40anti | 3.62044e-09 | 1.000000 | 3.62090e-09 | 1.000000 |
| rad42     | 1.98664e-09 | 1.000000 | 1.98690e-09 | 1.000000 |
| rad18     | 1.62848e-09 | 1.000000 | 1.62868e-09 | 1.000000 |
| rad33     | 1.53550e-09 | 1.000000 | 1.53570e-09 | 1.000000 |
| rad3      | 1.40578e-09 | 1.000000 | 1.40596e-09 | 1.000000 |
| rad24     | 1.30532e-09 | 1.000000 | 1.30548e-09 | 1.000000 |
| rad4      | 1.11830e-09 | 1.000000 | 1.11844e-09 | 1.000000 |
| rad72     | 1.00985e-09 | 1.000000 | 1.00998e-09 | 1.000000 |
| rad25     | 3.39619e-10 | 1.000000 | 3.39662e-10 | 1.000000 |
| rad27     | 1.76856e-10 | 1.000000 | 1.76879e-10 | 1.000000 |
| rad31     | 2.64689e-11 | 1.000000 | 2.64722e-11 | 1.000000 |
| rad14     | 1.94279e-11 | 1.000000 | 1.94304e-11 | 1.000000 |
| rad47     | 8.53095e-12 | 1.000000 | 8.53203e-12 | 1.000000 |
| rad5      | 2.26289e-13 | 1.000000 | 2.26317e-13 | 1.000000 |

1000.00000 Pa, 1300.00000 K

=====

| Rate constant             | True (fraction)       | Effective (fraction)  |
|---------------------------|-----------------------|-----------------------|
| Total                     | 4.84401e-12 (1.00 )   | 4.84262e-12 (1.00 )   |
| Formation of rad19        | 3.55537e-12 (0.734 )  | 3.55411e-12 (0.734 )  |
| H-abstraction to cyc2enyl | 9.48893e-13 (0.196 )  | 9.48893e-13 (0.196 )  |
| H-abstraction to cyclenyl | 3.39740e-13 (0.0701 ) | 3.39620e-13 (0.0701 ) |

| species                       | PYtrue      | Cumul    | PYeffective | Cumul    |
|-------------------------------|-------------|----------|-------------|----------|
| Indene+H                      | 0.614711    | 0.614711 | 0.614886    | 0.614886 |
| Benzene+cycloprop-2-enylidene | 0.195890    | 0.810601 | 0.195946    | 0.810832 |
| PhCHCCH2+H                    | 0.0989169   | 0.909518 | 0.0989452   | 0.909778 |
| Benzene+cycloprop-1-enylidene | 0.0701362   | 0.979654 | 0.0701313   | 0.979909 |
| Ph+MeAc                       | 0.00334238  | 0.982997 | 0.00334333  | 0.983252 |
| C2H2+PhCH2                    | 0.00319102  | 0.986188 | 0.00319194  | 0.986444 |
| Ph+Allene                     | 0.00318685  | 0.989374 | 0.00318776  | 0.989632 |
| rad9                          | 0.00276654  | 0.992141 | 0.00276734  | 0.992399 |
| PhCH2CCH+H                    | 0.00192319  | 0.994064 | 0.00192374  | 0.994323 |
| PhCCCH3+H                     | 0.00140027  | 0.995465 | 0.00140068  | 0.995724 |
| rad67                         | 0.00123302  | 0.996698 | 0.00123337  | 0.996957 |
| PhCCH+CH3                     | 0.000882794 | 0.997580 | 0.000883048 | 0.997840 |
| PhcycC3H3_A+H                 | 0.000703376 | 0.998284 | 0.000703577 | 0.998544 |
| PhcycC3H3_B+H                 | 0.000595987 | 0.998880 | 0.000596158 | 0.999140 |
| rad35                         | 0.000443894 | 0.999324 | 0.000444021 | 0.999584 |
| Phenyl+cycC3H4                | 0.000260520 | 0.999584 | 0.000000    | 0.999584 |
| PAH10+CH3                     | 0.000107436 | 0.999692 | 0.000107467 | 0.999691 |
| rad37                         | 8.70346e-05 | 0.999779 | 8.70601e-05 | 0.999778 |
| PAH7+H                        | 8.59351e-05 | 0.999865 | 8.59592e-05 | 0.999864 |
| PAH9+H                        | 2.76873e-05 | 0.999892 | 2.76952e-05 | 0.999892 |
| rad38                         | 2.39518e-05 | 0.999916 | 2.39587e-05 | 0.999916 |

|           |             |          |             |          |
|-----------|-------------|----------|-------------|----------|
| PAH3+H    | 1.75134e-05 | 0.999934 | 1.75184e-05 | 0.999933 |
| rad30     | 1.71046e-05 | 0.999951 | 1.71095e-05 | 0.999951 |
| rad39     | 1.45542e-05 | 0.999965 | 1.45584e-05 | 0.999965 |
| rad15     | 7.13245e-06 | 0.999972 | 7.13448e-06 | 0.999972 |
| rad12     | 5.74419e-06 | 0.999978 | 5.74582e-06 | 0.999978 |
| rad46     | 3.93199e-06 | 0.999982 | 3.93311e-06 | 0.999982 |
| rad50     | 3.17184e-06 | 0.999985 | 3.17274e-06 | 0.999985 |
| rad6      | 2.75565e-06 | 0.999988 | 2.75644e-06 | 0.999988 |
| rad59     | 1.74149e-06 | 0.999990 | 1.74199e-06 | 0.999990 |
| PAH1+H    | 1.71006e-06 | 0.999992 | 1.71055e-06 | 0.999991 |
| rad60syn  | 1.55946e-06 | 0.999993 | 1.55990e-06 | 0.999993 |
| rad54     | 1.43530e-06 | 0.999995 | 1.43571e-06 | 0.999994 |
| rad60anti | 9.65153e-07 | 0.999995 | 9.65431e-07 | 0.999995 |
| rad51     | 8.59234e-07 | 0.999996 | 8.59482e-07 | 0.999996 |
| rad43     | 5.16916e-07 | 0.999997 | 5.17063e-07 | 0.999997 |
| rad70     | 4.60585e-07 | 0.999997 | 4.60717e-07 | 0.999997 |
| rad23     | 4.15697e-07 | 0.999998 | 4.15816e-07 | 0.999998 |
| rad45     | 2.86628e-07 | 0.999998 | 2.86711e-07 | 0.999998 |
| rad52     | 2.64621e-07 | 0.999998 | 2.64697e-07 | 0.999998 |
| rad58     | 1.57316e-07 | 0.999998 | 1.57360e-07 | 0.999998 |
| rad19anti | 1.52498e-07 | 0.999999 | 1.52541e-07 | 0.999998 |
| rad11     | 1.32189e-07 | 0.999999 | 1.32226e-07 | 0.999999 |
| rad61     | 1.28291e-07 | 0.999999 | 1.28327e-07 | 0.999999 |
| rad2      | 1.17265e-07 | 0.999999 | 1.17298e-07 | 0.999999 |
| rad34     | 1.08471e-07 | 0.999999 | 1.08502e-07 | 0.999999 |
| rad55     | 9.87540e-08 | 0.999999 | 9.87823e-08 | 0.999999 |
| rad7      | 4.68586e-08 | 0.999999 | 4.68720e-08 | 0.999999 |
| rad8      | 4.58361e-08 | 0.999999 | 4.58492e-08 | 0.999999 |
| rad62     | 3.83425e-08 | 0.999999 | 3.83535e-08 | 0.999999 |
| rad21     | 3.28038e-08 | 0.999999 | 3.28132e-08 | 0.999999 |
| rad10     | 3.23329e-08 | 0.999999 | 3.23421e-08 | 0.999999 |
| rad1      | 3.21436e-08 | 0.999999 | 3.21528e-08 | 0.999999 |
| rad41     | 3.13325e-08 | 0.999999 | 3.13414e-08 | 0.999999 |
| PAH8+H    | 2.89752e-08 | 0.999999 | 2.89834e-08 | 0.999999 |
| rad36     | 2.77780e-08 | 0.999999 | 2.77859e-08 | 0.999999 |
| rad13     | 2.66817e-08 | 1.000000 | 2.66893e-08 | 0.999999 |
| rad71     | 2.51313e-08 | 1.000000 | 2.51385e-08 | 0.999999 |
| rad65     | 2.45905e-08 | 1.000000 | 2.45976e-08 | 0.999999 |
| rad53     | 2.09516e-08 | 1.000000 | 2.09575e-08 | 0.999999 |
| rad56     | 1.93604e-08 | 1.000000 | 1.93659e-08 | 0.999999 |
| rad73     | 1.85236e-08 | 1.000000 | 1.85289e-08 | 0.999999 |
| rad22     | 1.56115e-08 | 1.000000 | 1.56160e-08 | 0.999999 |
| rad19syn  | 1.00706e-08 | 1.000000 | 1.00735e-08 | 0.999999 |
| rad26     | 9.56698e-09 | 1.000000 | 9.56976e-09 | 0.999999 |
| rad20     | 8.96960e-09 | 1.000000 | 8.97213e-09 | 1.000000 |
| rad64     | 7.47332e-09 | 1.000000 | 7.47552e-09 | 1.000000 |
| rad68syn  | 6.46358e-09 | 1.000000 | 6.46542e-09 | 1.000000 |
| rad28     | 5.86927e-09 | 1.000000 | 5.87095e-09 | 1.000000 |
| rad40syn  | 4.66561e-09 | 1.000000 | 4.66695e-09 | 1.000000 |
| rad68anti | 4.21850e-09 | 1.000000 | 4.21970e-09 | 1.000000 |
| rad18     | 4.01685e-09 | 1.000000 | 4.01800e-09 | 1.000000 |
| rad40anti | 3.69516e-09 | 1.000000 | 3.69622e-09 | 1.000000 |
| rad42     | 2.48396e-09 | 1.000000 | 2.48467e-09 | 1.000000 |
| rad33     | 1.79919e-09 | 1.000000 | 1.79970e-09 | 1.000000 |
| rad24     | 1.62125e-09 | 1.000000 | 1.62172e-09 | 1.000000 |
| rad3      | 1.01591e-09 | 1.000000 | 1.01621e-09 | 1.000000 |
| rad72     | 8.11019e-10 | 1.000000 | 8.11249e-10 | 1.000000 |
| rad4      | 8.06329e-10 | 1.000000 | 8.06559e-10 | 1.000000 |
| rad25     | 6.22683e-10 | 1.000000 | 6.22860e-10 | 1.000000 |
| rad27     | 2.97598e-10 | 1.000000 | 2.97683e-10 | 1.000000 |
| rad14     | 2.97503e-11 | 1.000000 | 2.97588e-11 | 1.000000 |
| rad31     | 2.66661e-11 | 1.000000 | 2.66738e-11 | 1.000000 |
| rad47     | 8.17926e-12 | 1.000000 | 8.18155e-12 | 1.000000 |
| rad5      | 5.84126e-13 | 1.000000 | 5.84292e-13 | 1.000000 |

1000.00000 Pa, 1400.00000 K

| Rate constant             | True (fraction)      | Effective (fraction) |
|---------------------------|----------------------|----------------------|
| Total                     | 6.19360e-12 (1.00)   | 6.18997e-12 (1.00)   |
| Formation of rad19        | 4.34185e-12 (0.701)  | 4.33861e-12 (0.701)  |
| H-abstraction to cyc2enyl | 1.32990e-12 (0.215)  | 1.32990e-12 (0.215)  |
| H-abstraction to cyc1enyl | 5.21850e-13 (0.0843) | 5.21461e-13 (0.0842) |

| species                       | PYtrue    | Cumul    | PYeffective | Cumul    |
|-------------------------------|-----------|----------|-------------|----------|
| Indene+H                      | 0.558849  | 0.558849 | 0.559176    | 0.559176 |
| Benzene+cycloprop-2-enylidene | 0.214721  | 0.773570 | 0.214847    | 0.774023 |
| PhCHCCH2+H                    | 0.117977  | 0.891547 | 0.118046    | 0.892069 |
| Benzene+cycloprop-1-enylidene | 0.0842564 | 0.975804 | 0.0842429   | 0.976312 |

|                |             |          |             |          |
|----------------|-------------|----------|-------------|----------|
| Ph+MeAc        | 0.00403923  | 0.979843 | 0.00404160  | 0.980354 |
| Ph+Allene      | 0.00392899  | 0.983772 | 0.00393130  | 0.984285 |
| C2H2+PhCH2     | 0.00384086  | 0.987613 | 0.00384312  | 0.988128 |
| PhCH2CCH+H     | 0.00247070  | 0.990083 | 0.00247215  | 0.990600 |
| rad9           | 0.00178298  | 0.991866 | 0.00178403  | 0.992384 |
| PhCCH3+H       | 0.00164972  | 0.993516 | 0.00165068  | 0.994035 |
| rad67          | 0.00151469  | 0.995031 | 0.00151558  | 0.995551 |
| PhcycC3H3_A+H  | 0.00122392  | 0.996255 | 0.00122464  | 0.996775 |
| PhcycC3H3_B+H  | 0.00111406  | 0.997369 | 0.00111472  | 0.997890 |
| PhCCH+CH3      | 0.00103040  | 0.998399 | 0.00103100  | 0.998921 |
| rad35          | 0.000545150 | 0.998944 | 0.000545470 | 0.999466 |
| Phenyl+cycC3H4 | 0.000523354 | 0.999468 | 0.000000    | 0.999466 |
| PAH10+CH3      | 0.000147428 | 0.999615 | 0.000147515 | 0.999614 |
| rad37          | 0.000108818 | 0.999724 | 0.000108881 | 0.999723 |
| PAH7+H         | 0.000101564 | 0.999825 | 0.000101624 | 0.999824 |
| PAH9+H         | 3.72703e-05 | 0.999863 | 3.72923e-05 | 0.999862 |
| rad38          | 3.21288e-05 | 0.999895 | 3.21476e-05 | 0.999894 |
| PAH3+H         | 2.40752e-05 | 0.999919 | 2.40893e-05 | 0.999918 |
| rad30          | 2.16152e-05 | 0.999940 | 2.16278e-05 | 0.999940 |
| rad39          | 1.67274e-05 | 0.999957 | 1.67373e-05 | 0.999956 |
| rad15          | 1.09613e-05 | 0.999968 | 1.09678e-05 | 0.999967 |
| rad46          | 5.35688e-06 | 0.999974 | 5.36003e-06 | 0.999973 |
| rad12          | 4.63532e-06 | 0.999978 | 4.63804e-06 | 0.999977 |
| rad50          | 4.31513e-06 | 0.999982 | 4.31766e-06 | 0.999982 |
| rad6           | 2.46449e-06 | 0.999985 | 2.46594e-06 | 0.999984 |
| PAH1+H         | 2.38581e-06 | 0.999987 | 2.38722e-06 | 0.999986 |
| rad59          | 2.37983e-06 | 0.999990 | 2.38123e-06 | 0.999989 |
| rad60syn       | 2.08052e-06 | 0.999992 | 2.08174e-06 | 0.999991 |
| rad54          | 1.90222e-06 | 0.999994 | 1.90333e-06 | 0.999993 |
| rad60anti      | 1.29126e-06 | 0.999995 | 1.29202e-06 | 0.999994 |
| rad51          | 1.13951e-06 | 0.999996 | 1.14018e-06 | 0.999995 |
| rad43          | 6.97027e-07 | 0.999997 | 6.97436e-07 | 0.999996 |
| rad70          | 6.32825e-07 | 0.999997 | 6.33196e-07 | 0.999997 |
| rad23          | 4.31322e-07 | 0.999998 | 4.31574e-07 | 0.999997 |
| rad52          | 3.56796e-07 | 0.999998 | 3.57005e-07 | 0.999997 |
| rad45          | 2.64700e-07 | 0.999999 | 2.64855e-07 | 0.999998 |
| rad11          | 2.33655e-07 | 0.999999 | 2.33792e-07 | 0.999998 |
| rad58          | 2.18449e-07 | 0.999999 | 2.18577e-07 | 0.999998 |
| rad61          | 1.80799e-07 | 0.999999 | 1.80905e-07 | 0.999998 |
| rad34          | 1.50728e-07 | 0.999999 | 1.50816e-07 | 0.999998 |
| rad55          | 1.33566e-07 | 0.999999 | 1.33644e-07 | 0.999998 |
| rad19anti      | 1.18303e-07 | 1.000000 | 1.18372e-07 | 0.999999 |
| rad2           | 8.85945e-08 | 1.000000 | 8.86469e-08 | 0.999999 |
| rad7           | 8.74659e-08 | 1.000000 | 8.75170e-08 | 0.999999 |
| rad10          | 6.26008e-08 | 1.000000 | 6.26375e-08 | 0.999999 |
| rad8           | 5.81837e-08 | 1.000000 | 5.82178e-08 | 0.999999 |
| rad62          | 4.97328e-08 | 1.000000 | 4.97619e-08 | 0.999999 |
| rad41          | 4.37160e-08 | 1.000000 | 4.37416e-08 | 0.999999 |
| rad21          | 3.89131e-08 | 1.000000 | 3.89359e-08 | 0.999999 |
| PAH8+H         | 3.79566e-08 | 1.000000 | 3.79789e-08 | 0.999999 |
| rad65          | 3.28701e-08 | 1.000000 | 3.28894e-08 | 0.999999 |
| rad53          | 2.98685e-08 | 1.000000 | 2.98861e-08 | 0.999999 |
| rad13          | 2.92950e-08 | 1.000000 | 2.93122e-08 | 0.999999 |
| rad71          | 2.79767e-08 | 1.000000 | 2.79931e-08 | 0.999999 |
| rad56          | 2.78530e-08 | 1.000000 | 2.78694e-08 | 0.999999 |
| rad36          | 2.57793e-08 | 1.000000 | 2.57945e-08 | 0.999999 |
| rad1           | 2.44968e-08 | 1.000000 | 2.45112e-08 | 0.999999 |
| rad73          | 2.16073e-08 | 1.000000 | 2.16200e-08 | 0.999999 |
| rad22          | 1.88486e-08 | 1.000000 | 1.88597e-08 | 0.999999 |
| rad26          | 1.59296e-08 | 1.000000 | 1.59389e-08 | 0.999999 |
| rad64          | 1.03621e-08 | 1.000000 | 1.03681e-08 | 0.999999 |
| rad20          | 9.72402e-09 | 1.000000 | 9.72968e-09 | 0.999999 |
| rad68syn       | 8.90950e-09 | 1.000000 | 8.91473e-09 | 0.999999 |
| rad19syn       | 8.90593e-09 | 1.000000 | 8.91116e-09 | 0.999999 |
| rad18          | 8.62559e-09 | 1.000000 | 8.63065e-09 | 0.999999 |
| rad40syn       | 6.27380e-09 | 1.000000 | 6.27748e-09 | 0.999999 |
| rad68anti      | 5.81834e-09 | 1.000000 | 5.82175e-09 | 0.999999 |
| rad28          | 5.36630e-09 | 1.000000 | 5.36945e-09 | 0.999999 |
| rad40anti      | 4.95292e-09 | 1.000000 | 4.95583e-09 | 0.999999 |
| rad42          | 3.38319e-09 | 1.000000 | 3.38517e-09 | 0.999999 |
| rad24          | 1.85667e-09 | 1.000000 | 1.85776e-09 | 0.999999 |
| rad33          | 1.75753e-09 | 1.000000 | 1.75856e-09 | 0.999999 |
| rad25          | 8.25881e-10 | 1.000000 | 8.26366e-10 | 0.999999 |
| rad72          | 8.18156e-10 | 1.000000 | 8.18642e-10 | 0.999999 |
| rad3           | 7.32870e-10 | 1.000000 | 7.33299e-10 | 0.999999 |
| rad4           | 5.79305e-10 | 1.000000 | 5.79644e-10 | 0.999999 |
| rad27          | 3.75492e-10 | 1.000000 | 3.75713e-10 | 0.999999 |
| rad14          | 3.47624e-11 | 1.000000 | 3.47828e-11 | 0.999999 |
| rad31          | 2.64009e-11 | 1.000000 | 2.64164e-11 | 0.999999 |
| rad47          | 1.01645e-11 | 1.000000 | 1.01705e-11 | 0.999999 |

rad5 | 2.90642e-12 1.00000 | 2.90813e-12 0.999999

1000.00000 Pa, 1500.00000 K

| Rate constant             | True (fraction)       | Effective (fraction)  |
|---------------------------|-----------------------|-----------------------|
| Total                     | 7.80417e-12 (1.00 )   | 7.79561e-12 (1.00 )   |
| Formation of rad19        | 5.22661e-12 (0.670 )  | 5.21915e-12 (0.669 )  |
| H-abstraction to cyc2enyl | 1.80920e-12 (0.232 )  | 1.80920e-12 (0.232 )  |
| H-abstraction to cyclenyl | 7.68359e-13 (0.0985 ) | 7.67262e-13 (0.0984 ) |

| species                       | PYtrue      | Cumul    | PYeffective | Cumul    |
|-------------------------------|-------------|----------|-------------|----------|
| Indene+H                      | 0.501937    | 0.501937 | 0.502488    | 0.502488 |
| Benzene+cycloprop-2-enylidene | 0.231825    | 0.733761 | 0.232079    | 0.734567 |
| PhCHCCH2+H                    | 0.138244    | 0.872005 | 0.138395    | 0.872963 |
| Benzene+cycloprop-1-enylidene | 0.0984549   | 0.970460 | 0.0984223   | 0.971385 |
| Ph+MeAc                       | 0.00479174  | 0.975252 | 0.00479700  | 0.976182 |
| Ph+Allene                     | 0.00473437  | 0.979986 | 0.00473957  | 0.980922 |
| C2H2+PhCH2                    | 0.00455733  | 0.984543 | 0.00456233  | 0.985484 |
| PhCH2CCH+H                    | 0.00313491  | 0.987678 | 0.00313835  | 0.988622 |
| PhcycC3H3_A+H                 | 0.00200131  | 0.989680 | 0.00200351  | 0.990626 |
| PhcycC3H3_B+H                 | 0.00194650  | 0.991626 | 0.00194864  | 0.992574 |
| PhCCCH3+H                     | 0.00190299  | 0.993529 | 0.00190508  | 0.994479 |
| rad67                         | 0.00182834  | 0.995357 | 0.00183035  | 0.996310 |
| PhCCH+CH3                     | 0.00120007  | 0.996558 | 0.00120139  | 0.997511 |
| rad9                          | 0.00114397  | 0.997702 | 0.00114522  | 0.998656 |
| Phenyl+cycC3H4                | 0.000956153 | 0.998658 | 0.000000    | 0.998656 |
| rad35                         | 0.000658504 | 0.999316 | 0.000659228 | 0.999316 |
| PAH10+CH3                     | 0.000202610 | 0.999519 | 0.000202833 | 0.999518 |
| rad37                         | 0.000132294 | 0.999651 | 0.000132439 | 0.999651 |
| PAH7+H                        | 0.000118411 | 0.999769 | 0.000118541 | 0.999769 |
| PAH9+H                        | 5.12927e-05 | 0.999821 | 5.13491e-05 | 0.999821 |
| rad38                         | 4.34022e-05 | 0.999864 | 4.34499e-05 | 0.999864 |
| PAH3+H                        | 3.41910e-05 | 0.999898 | 3.42286e-05 | 0.999898 |
| rad30                         | 2.69747e-05 | 0.999925 | 2.70043e-05 | 0.999925 |
| rad39                         | 1.91599e-05 | 0.999945 | 1.91809e-05 | 0.999945 |
| rad15                         | 1.40600e-05 | 0.999959 | 1.40754e-05 | 0.999959 |
| rad46                         | 7.60769e-06 | 0.999966 | 7.61608e-06 | 0.999966 |
| rad50                         | 6.51095e-06 | 0.999973 | 6.51810e-06 | 0.999973 |
| rad12                         | 3.65492e-06 | 0.999976 | 3.65894e-06 | 0.999977 |
| PAH1+H                        | 3.45918e-06 | 0.999980 | 3.46297e-06 | 0.999980 |
| rad59                         | 3.32609e-06 | 0.999983 | 3.32974e-06 | 0.999983 |
| rad60syn                      | 2.79020e-06 | 0.999986 | 2.79326e-06 | 0.999986 |
| rad6                          | 2.57970e-06 | 0.999988 | 2.58252e-06 | 0.999989 |
| rad54                         | 2.46694e-06 | 0.999991 | 2.46965e-06 | 0.999991 |
| rad51                         | 1.77174e-06 | 0.999993 | 1.77369e-06 | 0.999993 |
| rad60anti                     | 1.73922e-06 | 0.999994 | 1.74114e-06 | 0.999995 |
| rad43                         | 9.43294e-07 | 0.999995 | 9.44327e-07 | 0.999996 |
| rad70                         | 8.85638e-07 | 0.999996 | 8.86610e-07 | 0.999997 |
| rad52                         | 5.47010e-07 | 0.999997 | 5.47611e-07 | 0.999997 |
| rad23                         | 4.76886e-07 | 0.999997 | 4.77409e-07 | 0.999998 |
| rad58                         | 3.29050e-07 | 0.999998 | 3.29411e-07 | 0.999998 |
| rad11                         | 2.98676e-07 | 0.999998 | 2.99005e-07 | 0.999998 |
| rad61                         | 2.77464e-07 | 0.999998 | 2.77770e-07 | 0.999998 |
| rad45                         | 2.39778e-07 | 0.999998 | 2.40041e-07 | 0.999999 |
| rad34                         | 2.17350e-07 | 0.999999 | 2.17589e-07 | 0.999999 |
| rad55                         | 1.77807e-07 | 0.999999 | 1.78002e-07 | 0.999999 |
| rad7                          | 1.20982e-07 | 0.999999 | 1.21115e-07 | 0.999999 |
| rad10                         | 9.44707e-08 | 0.999999 | 9.45747e-08 | 0.999999 |
| rad19anti                     | 9.29706e-08 | 0.999999 | 9.30723e-08 | 0.999999 |
| rad2                          | 6.65368e-08 | 0.999999 | 6.66099e-08 | 0.999999 |
| rad62                         | 6.40886e-08 | 0.999999 | 6.41590e-08 | 1.000000 |
| rad8                          | 6.38629e-08 | 0.999999 | 6.39330e-08 | 1.000000 |
| rad41                         | 6.37125e-08 | 0.999999 | 6.37824e-08 | 1.000000 |
| PAH8+H                        | 6.12294e-08 | 0.999999 | 6.12966e-08 | 1.000000 |
| rad65                         | 5.10123e-08 | 1.000000 | 5.10683e-08 | 1.000000 |
| rad71                         | 4.41215e-08 | 1.000000 | 4.41700e-08 | 1.000000 |
| rad53                         | 4.36582e-08 | 1.000000 | 4.37061e-08 | 1.000000 |
| rad56                         | 4.24084e-08 | 1.000000 | 4.24549e-08 | 1.000000 |
| rad21                         | 4.16988e-08 | 1.000000 | 4.17446e-08 | 1.000000 |
| rad73                         | 3.43500e-08 | 1.000000 | 3.43876e-08 | 1.000000 |
| rad26                         | 3.31232e-08 | 1.000000 | 3.31595e-08 | 1.000000 |
| rad13                         | 2.67091e-08 | 1.000000 | 2.67384e-08 | 1.000000 |
| rad36                         | 2.34881e-08 | 1.000000 | 2.35139e-08 | 1.000000 |
| rad22                         | 2.17353e-08 | 1.000000 | 2.17592e-08 | 1.000000 |
| rad1                          | 1.85890e-08 | 1.000000 | 1.86094e-08 | 1.000000 |
| rad64                         | 1.50923e-08 | 1.000000 | 1.51089e-08 | 1.000000 |
| rad68syn                      | 1.38846e-08 | 1.000000 | 1.38998e-08 | 1.000000 |
| rad18                         | 1.33925e-08 | 1.000000 | 1.34072e-08 | 1.000000 |

|           |             |          |             |         |
|-----------|-------------|----------|-------------|---------|
| rad40syn  | 1.00019e-08 | 1.000000 | 1.00129e-08 | 1.00000 |
| rad20     | 9.59816e-09 | 1.000000 | 9.60871e-09 | 1.00000 |
| rad68anti | 9.05991e-09 | 1.000000 | 9.06983e-09 | 1.00000 |
| rad40anti | 7.91060e-09 | 1.000000 | 7.91930e-09 | 1.00000 |
| rad19syn  | 7.89908e-09 | 1.000000 | 7.90771e-09 | 1.00000 |
| rad28     | 5.91356e-09 | 1.000000 | 5.92006e-09 | 1.00000 |
| rad42     | 4.69237e-09 | 1.000000 | 4.69753e-09 | 1.00000 |
| rad24     | 2.02326e-09 | 1.000000 | 2.02548e-09 | 1.00000 |
| rad33     | 1.55254e-09 | 1.000000 | 1.55424e-09 | 1.00000 |
| rad72     | 1.24666e-09 | 1.000000 | 1.24803e-09 | 1.00000 |
| rad25     | 9.14704e-10 | 1.000000 | 9.15706e-10 | 1.00000 |
| rad3      | 5.28386e-10 | 1.000000 | 5.28966e-10 | 1.00000 |
| rad4      | 4.15239e-10 | 1.000000 | 4.15695e-10 | 1.00000 |
| rad27     | 4.02983e-10 | 1.000000 | 4.03426e-10 | 1.00000 |
| rad14     | 3.47889e-11 | 1.000000 | 3.48270e-11 | 1.00000 |
| rad31     | 2.56526e-11 | 1.000000 | 2.56808e-11 | 1.00000 |
| rad5      | 1.98883e-11 | 1.000000 | 1.99101e-11 | 1.00000 |
| rad47     | 1.51574e-11 | 1.000000 | 1.51740e-11 | 1.00000 |

100.000000 Pa, 20.000000 K

=====

| Rate constant             | True (fraction)         | Effective (fraction)    |
|---------------------------|-------------------------|-------------------------|
| Total                     | 1.24541e-22 (1.00 )     | 1.24541e-22 (1.00 )     |
| Formation of rad19        | 1.24541e-22 (1.00 )     | 1.24541e-22 (1.00 )     |
| H-abstraction to cyc2enyl | 3.84323e-68 (3.09e-46)  | 3.84323e-68 (3.09e-46)  |
| H-abstraction to cyclenyl | 6.26313e-106 (5.03e-84) | 6.26313e-106 (5.03e-84) |

| species       | PYtrue      | Cumul    | PYeffective | Cumul    |
|---------------|-------------|----------|-------------|----------|
| rad9          | 0.852685    | 0.852685 | 0.852685    | 0.852685 |
| Indene+H      | 0.145930    | 0.998615 | 0.145930    | 0.998615 |
| rad15         | 0.00136693  | 0.999982 | 0.00136693  | 0.999982 |
| PhCHCCH2+H    | 1.55690e-05 | 0.999997 | 1.55690e-05 | 0.999997 |
| rad6          | 7.13859e-07 | 0.999998 | 7.13859e-07 | 0.999998 |
| rad2          | 4.71132e-07 | 0.999999 | 4.71132e-07 | 0.999999 |
| rad26         | 8.95959e-08 | 0.999999 | 8.95959e-08 | 0.999999 |
| C2H2+PhCH2    | 6.43591e-08 | 0.999999 | 6.43591e-08 | 0.999999 |
| rad10         | 5.31463e-08 | 0.999999 | 5.31463e-08 | 0.999999 |
| rad23         | 5.25822e-08 | 0.999999 | 5.25822e-08 | 0.999999 |
| rad1          | 2.98190e-08 | 0.999999 | 2.98190e-08 | 0.999999 |
| rad67         | 2.94078e-08 | 0.999999 | 2.94078e-08 | 0.999999 |
| PhCCH+CH3     | 2.05644e-08 | 0.999999 | 2.05644e-08 | 0.999999 |
| PhCCCH3+H     | 1.47674e-08 | 0.999999 | 1.47674e-08 | 0.999999 |
| rad35         | 1.32740e-08 | 0.999999 | 1.32740e-08 | 0.999999 |
| Ph+MeAc       | 9.04190e-09 | 0.999999 | 9.04190e-09 | 0.999999 |
| rad45         | 7.94158e-09 | 0.999999 | 7.94158e-09 | 0.999999 |
| rad12         | 6.40673e-09 | 0.999999 | 6.40673e-09 | 0.999999 |
| rad3          | 6.37510e-09 | 0.999999 | 6.37510e-09 | 0.999999 |
| rad19anti     | 3.97847e-09 | 0.999999 | 3.97847e-09 | 0.999999 |
| rad4          | 3.22233e-09 | 0.999999 | 3.22233e-09 | 0.999999 |
| rad11         | 1.88109e-09 | 0.999999 | 1.88109e-09 | 0.999999 |
| rad22         | 1.04937e-09 | 0.999999 | 1.04937e-09 | 0.999999 |
| Ph+Allene     | 5.51929e-10 | 0.999999 | 5.51929e-10 | 0.999999 |
| rad7          | 4.90394e-10 | 0.999999 | 4.90394e-10 | 0.999999 |
| rad36         | 4.87237e-10 | 0.999999 | 4.87237e-10 | 0.999999 |
| rad30         | 2.30399e-10 | 0.999999 | 2.30399e-10 | 0.999999 |
| PhCH2CCH+H    | 9.06961e-11 | 0.999999 | 9.06961e-11 | 0.999999 |
| rad28         | 2.96929e-11 | 0.999999 | 2.96929e-11 | 0.999999 |
| rad5          | 2.58080e-11 | 0.999999 | 2.58080e-11 | 0.999999 |
| rad37         | 7.88623e-12 | 0.999999 | 7.88623e-12 | 0.999999 |
| rad13         | 2.14412e-12 | 0.999999 | 2.14412e-12 | 0.999999 |
| rad18         | 1.70001e-12 | 0.999999 | 1.70001e-12 | 0.999999 |
| rad14         | 1.68678e-12 | 0.999999 | 1.68678e-12 | 0.999999 |
| rad27         | 1.55281e-12 | 0.999999 | 1.55281e-12 | 0.999999 |
| rad60syn      | 8.56976e-13 | 0.999999 | 8.56976e-13 | 0.999999 |
| PAH9+H        | 8.09741e-13 | 0.999999 | 8.09741e-13 | 0.999999 |
| rad60anti     | 4.13506e-13 | 0.999999 | 4.13506e-13 | 0.999999 |
| PhcycC3H3_A+H | 3.99919e-13 | 0.999999 | 3.99919e-13 | 0.999999 |
| rad38         | 3.83391e-13 | 0.999999 | 3.83391e-13 | 0.999999 |
| PAH7+H        | 3.43580e-13 | 0.999999 | 3.43580e-13 | 0.999999 |
| PAH3+H        | 2.96279e-13 | 0.999999 | 2.96279e-13 | 0.999999 |
| rad20         | 8.37568e-14 | 0.999999 | 8.37568e-14 | 0.999999 |
| rad59         | 6.25116e-14 | 0.999999 | 6.25116e-14 | 0.999999 |
| rad21         | 5.40789e-14 | 0.999999 | 5.40789e-14 | 0.999999 |
| rad25         | 3.34955e-14 | 0.999999 | 3.34955e-14 | 0.999999 |
| rad46         | 2.16884e-14 | 0.999999 | 2.16884e-14 | 0.999999 |
| rad39         | 5.57133e-15 | 0.999999 | 5.57133e-15 | 0.999999 |
| PAH10+CH3     | 5.04864e-15 | 0.999999 | 5.04864e-15 | 0.999999 |
| rad33         | 2.57759e-15 | 0.999999 | 2.57759e-15 | 0.999999 |



|                               |             |          |             |          |
|-------------------------------|-------------|----------|-------------|----------|
| rad43                         | 7.86204e-16 | 0.999999 | 7.86204e-16 | 0.999999 |
| rad24                         | 1.06276e-16 | 0.999999 | 1.06276e-16 | 0.999999 |
| rad62                         | 1.04668e-16 | 0.999999 | 1.04668e-16 | 0.999999 |
| rad50                         | 9.74924e-17 | 0.999999 | 9.74924e-17 | 0.999999 |
| Phenyl+cycC3H4                | 2.77356e-17 | 0.999999 | 0.00000     | 0.999999 |
| rad70                         | 1.19865e-17 | 0.999999 | 1.19865e-17 | 0.999999 |
| rad31                         | 9.47153e-18 | 0.999999 | 9.47153e-18 | 0.999999 |
| rad54                         | 5.30317e-18 | 0.999999 | 5.30317e-18 | 0.999999 |
| rad58                         | 2.45938e-18 | 0.999999 | 2.45938e-18 | 0.999999 |
| rad52                         | 5.06909e-19 | 0.999999 | 5.06909e-19 | 0.999999 |
| PAH1+H                        | 1.43527e-19 | 0.999999 | 1.43527e-19 | 0.999999 |
| rad51                         | 1.03270e-19 | 0.999999 | 1.03270e-19 | 0.999999 |
| rad34                         | 9.66461e-20 | 0.999999 | 9.66461e-20 | 0.999999 |
| rad55                         | 2.81631e-20 | 0.999999 | 2.81631e-20 | 0.999999 |
| rad41                         | 4.72330e-21 | 0.999999 | 4.72330e-21 | 0.999999 |
| rad42                         | 2.98769e-21 | 0.999999 | 2.98769e-21 | 0.999999 |
| rad65                         | 1.27269e-21 | 0.999999 | 1.27269e-21 | 0.999999 |
| PhcycC3H3_B+H                 | 9.42898e-23 | 0.999999 | 9.42898e-23 | 0.999999 |
| rad47                         | 8.08270e-25 | 0.999999 | 8.08270e-25 | 0.999999 |
| rad53                         | 1.97995e-28 | 0.999999 | 1.97995e-28 | 0.999999 |
| rad64                         | 2.96138e-31 | 0.999999 | 2.96138e-31 | 0.999999 |
| rad61                         | 4.94947e-32 | 0.999999 | 4.94947e-32 | 0.999999 |
| rad56                         | 1.18873e-35 | 0.999999 | 1.18873e-35 | 0.999999 |
| rad68syn                      | 6.91638e-36 | 0.999999 | 6.91638e-36 | 0.999999 |
| rad68anti                     | 5.68420e-36 | 0.999999 | 5.68420e-36 | 0.999999 |
| rad19syn                      | 1.38057e-37 | 0.999999 | 1.38057e-37 | 0.999999 |
| rad40syn                      | 6.06217e-41 | 0.999999 | 6.06217e-41 | 0.999999 |
| rad40anti                     | 4.83378e-41 | 0.999999 | 4.83378e-41 | 0.999999 |
| rad73                         | 4.41926e-42 | 0.999999 | 4.41926e-42 | 0.999999 |
| PAH8+H                        | 4.34200e-44 | 0.999999 | 4.34200e-44 | 0.999999 |
| Benzene+cycloprop-2-enylidene | 3.08591e-46 | 0.999999 | 3.08591e-46 | 0.999999 |
| rad71                         | 4.93961e-48 | 0.999999 | 4.93961e-48 | 0.999999 |
| rad8                          | 1.33959e-49 | 0.999999 | 1.33959e-49 | 0.999999 |
| Benzene+cycloprop-1-enylidene | 5.02895e-84 | 0.999999 | 5.02895e-84 | 0.999999 |

100.000000 Pa, 30.0000000 K

=====

| Rate constant             | True (fraction)        | Effective (fraction)   |
|---------------------------|------------------------|------------------------|
| Total                     | 8.13009e-20 (1.00 )    | 8.13009e-20 (1.00 )    |
| Formation of rad19        | 8.13009e-20 (1.00 )    | 8.13009e-20 (1.00 )    |
| H-abstraction to cyc2enyl | 1.08880e-49 (1.34e-30) | 1.08880e-49 (1.34e-30) |
| H-abstraction to cyc1enyl | 7.55172e-75 (9.29e-56) | 7.55172e-75 (9.29e-56) |

| species    | PYtrue      | Cumul    | PYeffective | Cumul    |
|------------|-------------|----------|-------------|----------|
| rad9       | 0.728058    | 0.728058 | 0.728058    | 0.728058 |
| Indene+H   | 0.270875    | 0.998933 | 0.270875    | 0.998933 |
| rad15      | 0.00103399  | 0.999967 | 0.00103399  | 0.999967 |
| PhCHCCH2+H | 2.99604e-05 | 0.999997 | 2.99604e-05 | 0.999997 |
| rad6       | 1.40811e-06 | 0.999998 | 1.40811e-06 | 0.999998 |
| rad2       | 7.90375e-07 | 0.999999 | 7.90375e-07 | 0.999999 |
| rad26      | 1.68841e-07 | 0.999999 | 1.68841e-07 | 0.999999 |
| C2H2+PhCH2 | 1.26227e-07 | 0.999999 | 1.26227e-07 | 0.999999 |
| rad10      | 8.97811e-08 | 1.000000 | 8.97811e-08 | 1.000000 |
| PhCCH+CH3  | 7.83618e-08 | 1.000000 | 7.83618e-08 | 1.000000 |
| rad23      | 7.17562e-08 | 1.000000 | 7.17562e-08 | 1.000000 |
| rad67      | 5.72747e-08 | 1.000000 | 5.72747e-08 | 1.000000 |
| PhCCCH3+H  | 5.24617e-08 | 1.000000 | 5.24617e-08 | 1.000000 |
| rad1       | 5.00014e-08 | 1.000000 | 5.00014e-08 | 1.000000 |
| Ph+MeAc    | 3.24458e-08 | 1.000000 | 3.24458e-08 | 1.000000 |
| rad35      | 2.58205e-08 | 1.000000 | 2.58205e-08 | 1.000000 |
| rad3       | 1.03591e-08 | 1.000000 | 1.03591e-08 | 1.000000 |
| rad45      | 8.68465e-09 | 1.000000 | 8.68465e-09 | 1.000000 |
| rad4       | 5.23463e-09 | 1.000000 | 5.23463e-09 | 1.000000 |
| rad12      | 4.63769e-09 | 1.000000 | 4.63769e-09 | 1.000000 |
| rad19anti  | 2.38160e-09 | 1.000000 | 2.38160e-09 | 1.000000 |
| Ph+Allene  | 1.14523e-09 | 1.000000 | 1.14523e-09 | 1.000000 |
| rad7       | 8.05002e-10 | 1.000000 | 8.05002e-10 | 1.000000 |
| rad11      | 7.97247e-10 | 1.000000 | 7.97247e-10 | 1.000000 |
| rad36      | 5.32650e-10 | 1.000000 | 5.32650e-10 | 1.000000 |
| rad30      | 4.49416e-10 | 1.000000 | 4.49416e-10 | 1.000000 |
| rad22      | 3.98257e-10 | 1.000000 | 3.98257e-10 | 1.000000 |
| PhCH2CCH+H | 1.90018e-10 | 1.000000 | 1.90018e-10 | 1.000000 |
| rad28      | 1.20086e-10 | 1.000000 | 1.20086e-10 | 1.000000 |
| rad37      | 3.10401e-11 | 1.000000 | 3.10401e-11 | 1.000000 |
| rad5       | 1.90260e-11 | 1.000000 | 1.90260e-11 | 1.000000 |
| rad13      | 3.17587e-12 | 1.000000 | 3.17587e-12 | 1.000000 |
| PAH9+H     | 3.01132e-12 | 1.000000 | 3.01132e-12 | 1.000000 |
| rad14      | 2.30502e-12 | 1.000000 | 2.30502e-12 | 1.000000 |

|                               |             |          |             |          |
|-------------------------------|-------------|----------|-------------|----------|
| rad27                         | 2.03412e-12 | 1.000000 | 2.03412e-12 | 1.000000 |
| rad60syn                      | 1.69166e-12 | 1.000000 | 1.69166e-12 | 1.000000 |
| rad38                         | 1.26779e-12 | 1.000000 | 1.26779e-12 | 1.000000 |
| PAH7+H                        | 8.65169e-13 | 1.000000 | 8.65169e-13 | 1.000000 |
| rad60anti                     | 8.17042e-13 | 1.000000 | 8.17042e-13 | 1.000000 |
| PAH3+H                        | 5.91943e-13 | 1.000000 | 5.91943e-13 | 1.000000 |
| PhcycC3H3_A+H                 | 4.29025e-13 | 1.000000 | 4.29025e-13 | 1.000000 |
| rad18                         | 2.51536e-13 | 1.000000 | 2.51536e-13 | 1.000000 |
| rad59                         | 1.24700e-13 | 1.000000 | 1.24700e-13 | 1.000000 |
| rad46                         | 7.20568e-14 | 1.000000 | 7.20568e-14 | 1.000000 |
| rad39                         | 4.76636e-14 | 1.000000 | 4.76636e-14 | 1.000000 |
| PAH10+CH3                     | 2.03340e-14 | 1.000000 | 2.03340e-14 | 1.000000 |
| rad20                         | 1.40269e-14 | 1.000000 | 1.40269e-14 | 1.000000 |
| rad25                         | 1.14936e-14 | 1.000000 | 1.14936e-14 | 1.000000 |
| rad21                         | 8.94268e-15 | 1.000000 | 8.94268e-15 | 1.000000 |
| rad33                         | 3.72664e-15 | 1.000000 | 3.72664e-15 | 1.000000 |
| rad43                         | 2.92469e-15 | 1.000000 | 2.92469e-15 | 1.000000 |
| rad62                         | 4.43310e-16 | 1.000000 | 4.43310e-16 | 1.000000 |
| rad50                         | 3.35126e-16 | 1.000000 | 3.35126e-16 | 1.000000 |
| rad24                         | 9.59585e-17 | 1.000000 | 9.59585e-17 | 1.000000 |
| Phenyl+cycC3H4                | 5.25634e-17 | 1.000000 | 0.000000    | 1.000000 |
| rad70                         | 2.69286e-17 | 1.000000 | 2.69286e-17 | 1.000000 |
| rad54                         | 2.38330e-17 | 1.000000 | 2.38330e-17 | 1.000000 |
| rad31                         | 1.58118e-17 | 1.000000 | 1.58118e-17 | 1.000000 |
| rad58                         | 5.08882e-18 | 1.000000 | 5.08882e-18 | 1.000000 |
| rad52                         | 1.77524e-18 | 1.000000 | 1.77524e-18 | 1.000000 |
| PAH1+H                        | 5.96660e-19 | 1.000000 | 5.96660e-19 | 1.000000 |
| rad51                         | 3.68249e-19 | 1.000000 | 3.68249e-19 | 1.000000 |
| rad34                         | 2.24774e-19 | 1.000000 | 2.24774e-19 | 1.000000 |
| rad55                         | 1.29198e-19 | 1.000000 | 1.29198e-19 | 1.000000 |
| rad41                         | 1.88805e-20 | 1.000000 | 1.88805e-20 | 1.000000 |
| rad42                         | 1.38454e-20 | 1.000000 | 1.38454e-20 | 1.000000 |
| rad65                         | 5.50047e-21 | 1.000000 | 5.50047e-21 | 1.000000 |
| PhcycC3H3_B+H                 | 1.84670e-22 | 1.000000 | 1.84670e-22 | 1.000000 |
| rad47                         | 1.16993e-24 | 1.000000 | 1.16993e-24 | 1.000000 |
| rad53                         | 9.89457e-28 | 1.000000 | 9.89457e-28 | 1.000000 |
| rad64                         | 2.75185e-30 | 1.000000 | 2.75185e-30 | 1.000000 |
| Benzene+cycloprop-2-enylidene | 1.33923e-30 | 1.000000 | 1.33923e-30 | 1.000000 |
| rad61                         | 2.03646e-31 | 1.000000 | 2.03646e-31 | 1.000000 |
| rad56                         | 5.41363e-35 | 1.000000 | 5.41363e-35 | 1.000000 |
| rad68syn                      | 1.45771e-35 | 1.000000 | 1.45771e-35 | 1.000000 |
| rad68anti                     | 1.19881e-35 | 1.000000 | 1.19881e-35 | 1.000000 |
| rad19syn                      | 8.40547e-38 | 1.000000 | 8.40547e-38 | 1.000000 |
| rad40syn                      | 1.21897e-40 | 1.000000 | 1.21897e-40 | 1.000000 |
| rad40anti                     | 9.73018e-41 | 1.000000 | 9.73018e-41 | 1.000000 |
| rad73                         | 1.12829e-41 | 1.000000 | 1.12829e-41 | 1.000000 |
| PAH8+H                        | 7.22376e-44 | 1.000000 | 7.22376e-44 | 1.000000 |
| rad71                         | 9.41551e-48 | 1.000000 | 9.41551e-48 | 1.000000 |
| rad8                          | 1.49564e-50 | 1.000000 | 1.49564e-50 | 1.000000 |
| Benzene+cycloprop-1-enylidene | 9.28861e-56 | 1.000000 | 9.28861e-56 | 1.000000 |

100.000000 Pa, 40.000000 K

=====

| Rate constant             | True (fraction)        | Effective (fraction)   |
|---------------------------|------------------------|------------------------|
| Total                     | 2.24819e-18 (1.00 )    | 2.24819e-18 (1.00 )    |
| Formation of rad19        | 2.24819e-18 (1.00 )    | 2.24819e-18 (1.00 )    |
| H-abstraction to cyc2enyl | 1.72361e-40 (7.67e-23) | 1.72361e-40 (7.67e-23) |
| H-abstraction to cyclenyl | 2.48792e-59 (1.11e-41) | 2.48792e-59 (1.11e-41) |

| species    | PYtrue      | Cumul    | PYeffective | Cumul    |
|------------|-------------|----------|-------------|----------|
| rad9       | 0.626285    | 0.626285 | 0.626285    | 0.626285 |
| Indene+H   | 0.372835    | 0.999120 | 0.372835    | 0.999120 |
| rad15      | 0.000833132 | 0.999953 | 0.000833132 | 0.999953 |
| PhCHCCH2+H | 4.29825e-05 | 0.999996 | 4.29825e-05 | 0.999996 |
| rad6       | 2.05881e-06 | 0.999998 | 2.05881e-06 | 0.999998 |
| rad2       | 9.98811e-07 | 0.999999 | 9.98811e-07 | 0.999999 |
| rad26      | 2.36352e-07 | 0.999999 | 2.36352e-07 | 0.999999 |
| C2H2+PhCH2 | 1.83497e-07 | 1.000000 | 1.83497e-07 | 1.000000 |
| PhCCH+CH3  | 1.59798e-07 | 1.000000 | 1.59798e-07 | 1.000000 |
| rad10      | 1.10745e-07 | 1.000000 | 1.10745e-07 | 1.000000 |
| PhCCCH3+H  | 1.04853e-07 | 1.000000 | 1.04853e-07 | 1.000000 |
| rad67      | 8.30963e-08 | 1.000000 | 8.30963e-08 | 1.000000 |
| rad23      | 7.38557e-08 | 1.000000 | 7.38557e-08 | 1.000000 |
| Ph+MeAc    | 6.54948e-08 | 1.000000 | 6.54948e-08 | 1.000000 |
| rad1       | 6.32384e-08 | 1.000000 | 6.32384e-08 | 1.000000 |
| rad35      | 3.74048e-08 | 1.000000 | 3.74048e-08 | 1.000000 |
| rad3       | 1.27461e-08 | 1.000000 | 1.27461e-08 | 1.000000 |
| rad45      | 7.94443e-09 | 1.000000 | 7.94443e-09 | 1.000000 |

|                               |             |         |             |         |
|-------------------------------|-------------|---------|-------------|---------|
| rad4                          | 6.44155e-09 | 1.00000 | 6.44155e-09 | 1.00000 |
| rad12                         | 3.72136e-09 | 1.00000 | 3.72136e-09 | 1.00000 |
| Ph+Allene                     | 1.72978e-09 | 1.00000 | 1.72978e-09 | 1.00000 |
| rad19anti                     | 1.71001e-09 | 1.00000 | 1.71001e-09 | 1.00000 |
| rad7                          | 1.06491e-09 | 1.00000 | 1.06491e-09 | 1.00000 |
| rad11                         | 6.70956e-10 | 1.00000 | 6.70956e-10 | 1.00000 |
| rad30                         | 6.51581e-10 | 1.00000 | 6.51581e-10 | 1.00000 |
| rad36                         | 4.87060e-10 | 1.00000 | 4.87060e-10 | 1.00000 |
| PhCH2CCH+H                    | 2.88762e-10 | 1.00000 | 2.88762e-10 | 1.00000 |
| rad28                         | 2.59780e-10 | 1.00000 | 2.59780e-10 | 1.00000 |
| rad22                         | 2.56675e-10 | 1.00000 | 2.56675e-10 | 1.00000 |
| rad37                         | 6.77015e-11 | 1.00000 | 6.77015e-11 | 1.00000 |
| rad5                          | 1.30634e-11 | 1.00000 | 1.30634e-11 | 1.00000 |
| PAH9+H                        | 5.92888e-12 | 1.00000 | 5.92888e-12 | 1.00000 |
| rad13                         | 4.01116e-12 | 1.00000 | 4.01116e-12 | 1.00000 |
| rad14                         | 2.58665e-12 | 1.00000 | 2.58665e-12 | 1.00000 |
| rad60syn                      | 2.48552e-12 | 1.00000 | 2.48552e-12 | 1.00000 |
| rad38                         | 2.41532e-12 | 1.00000 | 2.41532e-12 | 1.00000 |
| rad27                         | 2.25957e-12 | 1.00000 | 2.25957e-12 | 1.00000 |
| PAH7+H                        | 1.64835e-12 | 1.00000 | 1.64835e-12 | 1.00000 |
| rad60anti                     | 1.20179e-12 | 1.00000 | 1.20179e-12 | 1.00000 |
| PAH3+H                        | 8.82388e-13 | 1.00000 | 8.82388e-13 | 1.00000 |
| PhcycC3H3_A+H                 | 4.87148e-13 | 1.00000 | 4.87148e-13 | 1.00000 |
| rad59                         | 1.85525e-13 | 1.00000 | 1.85525e-13 | 1.00000 |
| rad39                         | 1.59715e-13 | 1.00000 | 1.59715e-13 | 1.00000 |
| rad46                         | 1.37877e-13 | 1.00000 | 1.37877e-13 | 1.00000 |
| rad18                         | 8.89576e-14 | 1.00000 | 8.89576e-14 | 1.00000 |
| PAH10+CH3                     | 4.60201e-14 | 1.00000 | 4.60201e-14 | 1.00000 |
| rad25                         | 8.32101e-15 | 1.00000 | 8.32101e-15 | 1.00000 |
| rad20                         | 6.57657e-15 | 1.00000 | 6.57657e-15 | 1.00000 |
| rad43                         | 6.18539e-15 | 1.00000 | 6.18539e-15 | 1.00000 |
| rad33                         | 4.65603e-15 | 1.00000 | 4.65603e-15 | 1.00000 |
| rad21                         | 4.16926e-15 | 1.00000 | 4.16926e-15 | 1.00000 |
| rad62                         | 9.82298e-16 | 1.00000 | 9.82298e-16 | 1.00000 |
| rad50                         | 6.63973e-16 | 1.00000 | 6.63973e-16 | 1.00000 |
| Phenyl+cycC3H4                | 1.15738e-16 | 1.00000 | 0.00000     | 1.00000 |
| rad24                         | 8.05977e-17 | 1.00000 | 8.05977e-17 | 1.00000 |
| rad54                         | 5.66789e-17 | 1.00000 | 5.66789e-17 | 1.00000 |
| rad70                         | 4.33251e-17 | 1.00000 | 4.33251e-17 | 1.00000 |
| rad31                         | 2.00076e-17 | 1.00000 | 2.00076e-17 | 1.00000 |
| rad58                         | 7.95837e-18 | 1.00000 | 7.95837e-18 | 1.00000 |
| rad52                         | 3.59022e-18 | 1.00000 | 3.59022e-18 | 1.00000 |
| PAH1+H                        | 1.42778e-18 | 1.00000 | 1.42778e-18 | 1.00000 |
| rad51                         | 7.60823e-19 | 1.00000 | 7.60823e-19 | 1.00000 |
| rad34                         | 3.75858e-19 | 1.00000 | 3.75858e-19 | 1.00000 |
| rad55                         | 3.14638e-19 | 1.00000 | 3.14638e-19 | 1.00000 |
| rad41                         | 4.49406e-20 | 1.00000 | 4.49406e-20 | 1.00000 |
| rad42                         | 3.41905e-20 | 1.00000 | 3.41905e-20 | 1.00000 |
| rad65                         | 1.23030e-20 | 1.00000 | 1.23030e-20 | 1.00000 |
| PhcycC3H3_B+H                 | 3.98948e-22 | 1.00000 | 3.98948e-22 | 1.00000 |
| Benzene+cycloprop-2-enylidene | 7.66665e-23 | 1.00000 | 7.66665e-23 | 1.00000 |
| rad47                         | 1.41424e-24 | 1.00000 | 1.41424e-24 | 1.00000 |
| rad53                         | 3.26032e-27 | 1.00000 | 3.26032e-27 | 1.00000 |
| rad64                         | 1.27520e-29 | 1.00000 | 1.27520e-29 | 1.00000 |
| rad61                         | 6.17451e-31 | 1.00000 | 6.17451e-31 | 1.00000 |
| rad56                         | 1.82061e-34 | 1.00000 | 1.82061e-34 | 1.00000 |
| rad68syn                      | 3.29094e-35 | 1.00000 | 3.29094e-35 | 1.00000 |
| rad68anti                     | 2.70672e-35 | 1.00000 | 2.70672e-35 | 1.00000 |
| rad19syn                      | 8.62695e-38 | 1.00000 | 8.62695e-38 | 1.00000 |
| rad40syn                      | 2.58732e-40 | 1.00000 | 2.58732e-40 | 1.00000 |
| rad40anti                     | 2.06609e-40 | 1.00000 | 2.06609e-40 | 1.00000 |
| rad73                         | 2.67781e-41 | 1.00000 | 2.67781e-41 | 1.00000 |
| Benzene+cycloprop-1-enylidene | 1.10663e-41 | 1.00000 | 1.10663e-41 | 1.00000 |
| PAH8+H                        | 1.40036e-43 | 1.00000 | 1.40036e-43 | 1.00000 |
| rad71                         | 1.97139e-47 | 1.00000 | 1.97139e-47 | 1.00000 |
| rad8                          | 5.77732e-51 | 1.00000 | 5.77732e-51 | 1.00000 |

100.000000 Pa, 50.0000000 K

| Rate constant             | True (fraction)        | Effective (fraction)   |
|---------------------------|------------------------|------------------------|
| Total                     | 1.72707e-17 (1.00 )    | 1.72707e-17 (1.00 )    |
| Formation of rad19        | 1.72707e-17 (1.00 )    | 1.72707e-17 (1.00 )    |
| H-abstraction to cyc2enyl | 5.49905e-35 (3.18e-18) | 5.49905e-35 (3.18e-18) |
| H-abstraction to cyclenyl | 4.93090e-50 (2.86e-33) | 4.93090e-50 (2.86e-33) |

  

| species  | PYtrue   | Cumul    | PYeffective | Cumul    |
|----------|----------|----------|-------------|----------|
| rad9     | 0.541439 | 0.541439 | 0.541439    | 0.541439 |
| Indene+H | 0.457811 | 0.999250 | 0.457811    | 0.999250 |

|                               |             |          |             |          |
|-------------------------------|-------------|----------|-------------|----------|
| rad15                         | 0.000689185 | 0.999939 | 0.000689185 | 0.999939 |
| PhCHCCH2+H                    | 5.51549e-05 | 0.999994 | 5.51549e-05 | 0.999994 |
| rad6                          | 2.68293e-06 | 0.999997 | 2.68293e-06 | 0.999997 |
| rad2                          | 1.13298e-06 | 0.999998 | 1.13298e-06 | 0.999998 |
| rad26                         | 2.94807e-07 | 0.999998 | 2.94807e-07 | 0.999998 |
| PhCCH+CH3                     | 2.58365e-07 | 0.999999 | 2.58365e-07 | 0.999999 |
| C2H2+PhCH2                    | 2.38451e-07 | 0.999999 | 2.38451e-07 | 0.999999 |
| PhCCCH3+H                     | 1.68217e-07 | 0.999999 | 1.68217e-07 | 0.999999 |
| rad10                         | 1.23004e-07 | 0.999999 | 1.23004e-07 | 0.999999 |
| rad67                         | 1.07898e-07 | 0.999999 | 1.07898e-07 | 0.999999 |
| Ph+MeAc                       | 1.06188e-07 | 0.999999 | 1.06188e-07 | 0.999999 |
| rad1                          | 7.18378e-08 | 1.000000 | 7.18378e-08 | 1.000000 |
| rad23                         | 6.92410e-08 | 1.000000 | 6.92410e-08 | 1.000000 |
| rad35                         | 4.84868e-08 | 1.000000 | 4.84868e-08 | 1.000000 |
| rad3                          | 1.41638e-08 | 1.000000 | 1.41638e-08 | 1.000000 |
| rad4                          | 7.16003e-09 | 1.000000 | 7.16003e-09 | 1.000000 |
| rad45                         | 6.87883e-09 | 1.000000 | 6.87883e-09 | 1.000000 |
| rad12                         | 3.09599e-09 | 1.000000 | 3.09599e-09 | 1.000000 |
| Ph+Allene                     | 2.32959e-09 | 1.000000 | 2.32959e-09 | 1.000000 |
| rad19anti                     | 1.31571e-09 | 1.000000 | 1.31571e-09 | 1.000000 |
| rad7                          | 1.29719e-09 | 1.000000 | 1.29719e-09 | 1.000000 |
| rad30                         | 8.44981e-10 | 1.000000 | 8.44981e-10 | 1.000000 |
| rad11                         | 6.84758e-10 | 1.000000 | 6.84758e-10 | 1.000000 |
| rad28                         | 4.44436e-10 | 1.000000 | 4.44436e-10 | 1.000000 |
| rad36                         | 4.21544e-10 | 1.000000 | 4.21544e-10 | 1.000000 |
| PhCH2CCH+H                    | 3.91177e-10 | 1.000000 | 3.91177e-10 | 1.000000 |
| rad22                         | 1.94808e-10 | 1.000000 | 1.94808e-10 | 1.000000 |
| rad37                         | 1.17740e-10 | 1.000000 | 1.17740e-10 | 1.000000 |
| PAH9+H                        | 9.29414e-12 | 1.000000 | 9.29414e-12 | 1.000000 |
| rad5                          | 9.18172e-12 | 1.000000 | 9.18172e-12 | 1.000000 |
| rad13                         | 4.75095e-12 | 1.000000 | 4.75095e-12 | 1.000000 |
| rad38                         | 3.74597e-12 | 1.000000 | 3.74597e-12 | 1.000000 |
| rad60syn                      | 3.27114e-12 | 1.000000 | 3.27114e-12 | 1.000000 |
| PAH7+H                        | 2.83211e-12 | 1.000000 | 2.83211e-12 | 1.000000 |
| rad14                         | 2.70386e-12 | 1.000000 | 2.70386e-12 | 1.000000 |
| rad27                         | 2.35437e-12 | 1.000000 | 2.35437e-12 | 1.000000 |
| rad60anti                     | 1.58363e-12 | 1.000000 | 1.58363e-12 | 1.000000 |
| PAH3+H                        | 1.18057e-12 | 1.000000 | 1.18057e-12 | 1.000000 |
| PhcycC3H3_A+H                 | 5.70236e-13 | 1.000000 | 5.70236e-13 | 1.000000 |
| rad39                         | 3.76382e-13 | 1.000000 | 3.76382e-13 | 1.000000 |
| rad59                         | 2.47660e-13 | 1.000000 | 2.47660e-13 | 1.000000 |
| rad46                         | 2.14668e-13 | 1.000000 | 2.14668e-13 | 1.000000 |
| PAH10+CH3                     | 8.37606e-14 | 1.000000 | 8.37606e-14 | 1.000000 |
| rad18                         | 4.79010e-14 | 1.000000 | 4.79010e-14 | 1.000000 |
| rad43                         | 1.05827e-14 | 1.000000 | 1.05827e-14 | 1.000000 |
| rad25                         | 7.69284e-15 | 1.000000 | 7.69284e-15 | 1.000000 |
| rad33                         | 5.48232e-15 | 1.000000 | 5.48232e-15 | 1.000000 |
| rad20                         | 4.38792e-15 | 1.000000 | 4.38792e-15 | 1.000000 |
| rad21                         | 2.76975e-15 | 1.000000 | 2.76975e-15 | 1.000000 |
| rad62                         | 1.72426e-15 | 1.000000 | 1.72426e-15 | 1.000000 |
| rad50                         | 1.07175e-15 | 1.000000 | 1.07175e-15 | 1.000000 |
| Phenyl+cycC3H4                | 2.36668e-16 | 1.000000 | 0.000000    | 1.000000 |
| rad54                         | 1.06812e-16 | 1.000000 | 1.06812e-16 | 1.000000 |
| rad24                         | 6.64280e-17 | 1.000000 | 6.64280e-17 | 1.000000 |
| rad70                         | 6.22509e-17 | 1.000000 | 6.22509e-17 | 1.000000 |
| rad31                         | 2.28400e-17 | 1.000000 | 2.28400e-17 | 1.000000 |
| rad58                         | 1.12712e-17 | 1.000000 | 1.12712e-17 | 1.000000 |
| rad52                         | 5.92573e-18 | 1.000000 | 5.92573e-18 | 1.000000 |
| Benzene+cycloprop-2-enylidene | 3.18404e-18 | 1.000000 | 3.18404e-18 | 1.000000 |
| PAH1+H                        | 2.78675e-18 | 1.000000 | 2.78675e-18 | 1.000000 |
| rad51                         | 1.28621e-18 | 1.000000 | 1.28621e-18 | 1.000000 |
| rad55                         | 6.09432e-19 | 1.000000 | 6.09432e-19 | 1.000000 |
| rad34                         | 5.63784e-19 | 1.000000 | 5.63784e-19 | 1.000000 |
| rad41                         | 8.88591e-20 | 1.000000 | 8.88591e-20 | 1.000000 |
| rad42                         | 6.79198e-20 | 1.000000 | 6.79198e-20 | 1.000000 |
| rad65                         | 2.18340e-20 | 1.000000 | 2.18340e-20 | 1.000000 |
| PhcycC3H3_B+H                 | 1.24453e-21 | 1.000000 | 1.24453e-21 | 1.000000 |
| rad47                         | 1.59432e-24 | 1.000000 | 1.59432e-24 | 1.000000 |
| rad53                         | 9.86115e-27 | 1.000000 | 9.86115e-27 | 1.000000 |
| rad64                         | 4.89300e-29 | 1.000000 | 4.89300e-29 | 1.000000 |
| rad61                         | 1.86183e-30 | 1.000000 | 1.86183e-30 | 1.000000 |
| Benzene+cycloprop-1-enylidene | 2.85507e-33 | 1.000000 | 2.85507e-33 | 1.000000 |
| rad56                         | 6.09961e-34 | 1.000000 | 6.09961e-34 | 1.000000 |
| rad68syn                      | 8.72159e-35 | 1.000000 | 8.72159e-35 | 1.000000 |
| rad68anti                     | 7.17129e-35 | 1.000000 | 7.17129e-35 | 1.000000 |
| rad19syn                      | 1.15850e-37 | 1.000000 | 1.15850e-37 | 1.000000 |
| rad40syn                      | 6.76772e-40 | 1.000000 | 6.76772e-40 | 1.000000 |
| rad40anti                     | 5.40433e-40 | 1.000000 | 5.40433e-40 | 1.000000 |
| rad73                         | 7.39092e-41 | 1.000000 | 7.39092e-41 | 1.000000 |
| PAH8+H                        | 3.54105e-43 | 1.000000 | 3.54105e-43 | 1.000000 |

|       |             |          |             |          |
|-------|-------------|----------|-------------|----------|
| rad71 | 5.35008e-47 | 1.000000 | 5.35008e-47 | 1.000000 |
| rad8  | 3.47493e-51 | 1.000000 | 3.47493e-51 | 1.000000 |

100.000000 Pa, 60.000000 K

=====

| Rate constant             | True (fraction)        | Effective (fraction)   |
|---------------------------|------------------------|------------------------|
| Total                     | 6.93738e-17 (1.00 )    | 6.93738e-17 (1.00 )    |
| Formation of rad19        | 6.93738e-17 (1.000 )   | 6.93738e-17 (1.000 )   |
| H-abstraction to cyc2enyl | 2.50609e-31 (3.61e-15) | 2.50609e-31 (3.61e-15) |
| H-abstraction to cyclenyl | 7.62015e-44 (1.10e-27) | 7.62015e-44 (1.10e-27) |

| species                       | PYtrue      | Cumul    | PYeffective | Cumul    |
|-------------------------------|-------------|----------|-------------|----------|
| Indene+H                      | 0.529570    | 0.529570 | 0.529570    | 0.529570 |
| rad9                          | 0.469778    | 0.999348 | 0.469778    | 0.999348 |
| rad15                         | 0.000578603 | 0.999927 | 0.000578603 | 0.999927 |
| PhCHCCH2+H                    | 6.67385e-05 | 0.999993 | 6.67385e-05 | 0.999993 |
| rad6                          | 3.28766e-06 | 0.999997 | 3.28766e-06 | 0.999997 |
| rad2                          | 1.21406e-06 | 0.999998 | 1.21406e-06 | 0.999998 |
| PhCCH+CH3                     | 3.70052e-07 | 0.999998 | 3.70052e-07 | 0.999998 |
| rad26                         | 3.45468e-07 | 0.999999 | 3.45468e-07 | 0.999999 |
| C2H2+PhCH2                    | 2.92200e-07 | 0.999999 | 2.92200e-07 | 0.999999 |
| PhCCCH3+H                     | 2.40272e-07 | 0.999999 | 2.40272e-07 | 0.999999 |
| Ph+MeAc                       | 1.53343e-07 | 0.999999 | 1.53343e-07 | 0.999999 |
| rad67                         | 1.32167e-07 | 0.999999 | 1.32167e-07 | 0.999999 |
| rad10                         | 1.29594e-07 | 1.000000 | 1.29594e-07 | 1.000000 |
| rad1                          | 7.71265e-08 | 1.000000 | 7.71265e-08 | 1.000000 |
| rad23                         | 6.22295e-08 | 1.000000 | 6.22295e-08 | 1.000000 |
| rad35                         | 5.92869e-08 | 1.000000 | 5.92869e-08 | 1.000000 |
| rad3                          | 1.49289e-08 | 1.000000 | 1.49289e-08 | 1.000000 |
| rad4                          | 7.54980e-09 | 1.000000 | 7.54980e-09 | 1.000000 |
| rad45                         | 5.82585e-09 | 1.000000 | 5.82585e-09 | 1.000000 |
| Ph+Allene                     | 2.95733e-09 | 1.000000 | 2.95733e-09 | 1.000000 |
| rad12                         | 2.62336e-09 | 1.000000 | 2.62336e-09 | 1.000000 |
| rad7                          | 1.51155e-09 | 1.000000 | 1.51155e-09 | 1.000000 |
| rad19anti                     | 1.05002e-09 | 1.000000 | 1.05002e-09 | 1.000000 |
| rad30                         | 1.03351e-09 | 1.000000 | 1.03351e-09 | 1.000000 |
| rad11                         | 7.34694e-10 | 1.000000 | 7.34694e-10 | 1.000000 |
| rad28                         | 6.72164e-10 | 1.000000 | 6.72164e-10 | 1.000000 |
| PhCH2CCH+H                    | 4.99534e-10 | 1.000000 | 4.99534e-10 | 1.000000 |
| rad36                         | 3.56868e-10 | 1.000000 | 3.56868e-10 | 1.000000 |
| rad37                         | 1.81523e-10 | 1.000000 | 1.81523e-10 | 1.000000 |
| rad22                         | 1.57417e-10 | 1.000000 | 1.57417e-10 | 1.000000 |
| PAH9+H                        | 1.29865e-11 | 1.000000 | 1.29865e-11 | 1.000000 |
| rad5                          | 6.66139e-12 | 1.000000 | 6.66139e-12 | 1.000000 |
| rad13                         | 5.42993e-12 | 1.000000 | 5.42993e-12 | 1.000000 |
| rad38                         | 5.22673e-12 | 1.000000 | 5.22673e-12 | 1.000000 |
| PAH7+H                        | 4.56752e-12 | 1.000000 | 4.56752e-12 | 1.000000 |
| rad60syn                      | 4.06389e-12 | 1.000000 | 4.06389e-12 | 1.000000 |
| rad14                         | 2.72437e-12 | 1.000000 | 2.72437e-12 | 1.000000 |
| rad27                         | 2.37058e-12 | 1.000000 | 2.37058e-12 | 1.000000 |
| rad60anti                     | 1.97003e-12 | 1.000000 | 1.97003e-12 | 1.000000 |
| PAH3+H                        | 1.49286e-12 | 1.000000 | 1.49286e-12 | 1.000000 |
| rad39                         | 7.37556e-13 | 1.000000 | 7.37556e-13 | 1.000000 |
| PhcycC3H3_A+H                 | 6.78092e-13 | 1.000000 | 6.78092e-13 | 1.000000 |
| rad59                         | 3.12406e-13 | 1.000000 | 3.12406e-13 | 1.000000 |
| rad46                         | 3.00476e-13 | 1.000000 | 3.00476e-13 | 1.000000 |
| PAH10+CH3                     | 1.35881e-13 | 1.000000 | 1.35881e-13 | 1.000000 |
| rad18                         | 3.25799e-14 | 1.000000 | 3.25799e-14 | 1.000000 |
| rad43                         | 1.61951e-14 | 1.000000 | 1.61951e-14 | 1.000000 |
| rad25                         | 7.73283e-15 | 1.000000 | 7.73283e-15 | 1.000000 |
| rad33                         | 6.24488e-15 | 1.000000 | 6.24488e-15 | 1.000000 |
| Benzene+cycloprop-2-enylidene | 3.61245e-15 | 1.000000 | 3.61245e-15 | 1.000000 |
| rad20                         | 3.37805e-15 | 1.000000 | 3.37805e-15 | 1.000000 |
| rad62                         | 2.68407e-15 | 1.000000 | 2.68407e-15 | 1.000000 |
| rad21                         | 2.12473e-15 | 1.000000 | 2.12473e-15 | 1.000000 |
| rad50                         | 1.55586e-15 | 1.000000 | 1.55586e-15 | 1.000000 |
| Phenyl+cycC3H4                | 4.45921e-16 | 1.000000 | 0.000000    | 1.000000 |
| rad54                         | 1.78443e-16 | 1.000000 | 1.78443e-16 | 1.000000 |
| rad70                         | 8.45239e-17 | 1.000000 | 8.45239e-17 | 1.000000 |
| rad24                         | 5.44900e-17 | 1.000000 | 5.44900e-17 | 1.000000 |
| rad31                         | 2.47273e-17 | 1.000000 | 2.47273e-17 | 1.000000 |
| rad58                         | 1.51694e-17 | 1.000000 | 1.51694e-17 | 1.000000 |
| rad52                         | 8.80461e-18 | 1.000000 | 8.80461e-18 | 1.000000 |
| PAH1+H                        | 4.88964e-18 | 1.000000 | 4.88964e-18 | 1.000000 |
| rad51                         | 1.96047e-18 | 1.000000 | 1.96047e-18 | 1.000000 |
| rad55                         | 1.04923e-18 | 1.000000 | 1.04923e-18 | 1.000000 |
| rad34                         | 8.01373e-19 | 1.000000 | 8.01373e-19 | 1.000000 |
| rad41                         | 1.59332e-19 | 1.000000 | 1.59332e-19 | 1.000000 |

|                               |             |          |             |          |
|-------------------------------|-------------|----------|-------------|----------|
| rad42                         | 1.20713e-19 | 1.000000 | 1.20713e-19 | 1.000000 |
| rad65                         | 3.44897e-20 | 1.000000 | 3.44897e-20 | 1.000000 |
| PhcycC3H3_B+H                 | 1.70315e-20 | 1.000000 | 1.70315e-20 | 1.000000 |
| rad47                         | 1.73255e-24 | 1.000000 | 1.73255e-24 | 1.000000 |
| rad53                         | 2.99093e-26 | 1.000000 | 2.99093e-26 | 1.000000 |
| Benzene+cycloprop-1-enylidene | 1.09842e-27 | 1.000000 | 1.09842e-27 | 1.000000 |
| rad64                         | 1.78796e-28 | 1.000000 | 1.78796e-28 | 1.000000 |
| rad61                         | 6.03390e-30 | 1.000000 | 6.03390e-30 | 1.000000 |
| rad56                         | 2.19100e-33 | 1.000000 | 2.19100e-33 | 1.000000 |
| rad68syn                      | 2.72242e-34 | 1.000000 | 2.72242e-34 | 1.000000 |
| rad68anti                     | 2.23730e-34 | 1.000000 | 2.23730e-34 | 1.000000 |
| rad19syn                      | 1.80678e-37 | 1.000000 | 1.80678e-37 | 1.000000 |
| rad40syn                      | 2.18873e-39 | 1.000000 | 2.18873e-39 | 1.000000 |
| rad40anti                     | 1.74738e-39 | 1.000000 | 1.74738e-39 | 1.000000 |
| rad73                         | 2.43903e-40 | 1.000000 | 2.43903e-40 | 1.000000 |
| PAH8+H                        | 1.15013e-42 | 1.000000 | 1.15013e-42 | 1.000000 |
| rad71                         | 1.85750e-46 | 1.000000 | 1.85750e-46 | 1.000000 |
| rad8                          | 2.62186e-51 | 1.000000 | 2.62186e-51 | 1.000000 |

100.000000 Pa, 70.0000000 K

=====

| Rate constant             | True (fraction)        | Effective (fraction)   |
|---------------------------|------------------------|------------------------|
| Total                     | 1.91520e-16 (1.00 )    | 1.91520e-16 (1.00 )    |
| Formation of rad19        | 1.91520e-16 (1.000 )   | 1.91520e-16 (1.000 )   |
| H-abstraction to cyc2enyl | 1.01125e-28 (5.28e-13) | 1.01125e-28 (5.28e-13) |
| H-abstraction to cyclenyl | 1.97822e-39 (1.03e-23) | 1.97822e-39 (1.03e-23) |

| species                       | PYtrue      | Cumul    | PYeffective | Cumul    |
|-------------------------------|-------------|----------|-------------|----------|
| Indene+H                      | 0.590757    | 0.590757 | 0.590757    | 0.590757 |
| rad9                          | 0.408668    | 0.999425 | 0.408668    | 0.999425 |
| rad15                         | 0.000490379 | 0.999915 | 0.000490379 | 0.999915 |
| PhCHCCH2+H                    | 7.79138e-05 | 0.999993 | 7.79138e-05 | 0.999993 |
| rad6                          | 3.87809e-06 | 0.999997 | 3.87809e-06 | 0.999997 |
| rad2                          | 1.25625e-06 | 0.999998 | 1.25625e-06 | 0.999998 |
| PhCCH+CH3                     | 4.92312e-07 | 0.999999 | 4.92312e-07 | 0.999999 |
| rad26                         | 3.89181e-07 | 0.999999 | 3.89181e-07 | 0.999999 |
| C2H2+PhCH2                    | 3.45545e-07 | 1.000000 | 3.45545e-07 | 1.000000 |
| PhCCCH3+H                     | 3.19605e-07 | 1.000000 | 3.19605e-07 | 1.000000 |
| Ph+MeAc                       | 2.06286e-07 | 1.000000 | 2.06286e-07 | 1.000000 |
| rad67                         | 1.56250e-07 | 1.000000 | 1.56250e-07 | 1.000000 |
| rad10                         | 1.32263e-07 | 1.000000 | 1.32263e-07 | 1.000000 |
| rad1                          | 7.99883e-08 | 1.000000 | 7.99883e-08 | 1.000000 |
| rad35                         | 6.99606e-08 | 1.000000 | 6.99606e-08 | 1.000000 |
| rad23                         | 5.47347e-08 | 1.000000 | 5.47347e-08 | 1.000000 |
| rad3                          | 1.52374e-08 | 1.000000 | 1.52374e-08 | 1.000000 |
| rad4                          | 7.70966e-09 | 1.000000 | 7.70966e-09 | 1.000000 |
| rad45                         | 4.88867e-09 | 1.000000 | 4.88867e-09 | 1.000000 |
| Ph+Allene                     | 3.62405e-09 | 1.000000 | 3.62405e-09 | 1.000000 |
| rad12                         | 2.24740e-09 | 1.000000 | 2.24740e-09 | 1.000000 |
| rad7                          | 1.71334e-09 | 1.000000 | 1.71334e-09 | 1.000000 |
| rad30                         | 1.21995e-09 | 1.000000 | 1.21995e-09 | 1.000000 |
| rad28                         | 9.42748e-10 | 1.000000 | 9.42748e-10 | 1.000000 |
| rad19anti                     | 8.57082e-10 | 1.000000 | 8.57082e-10 | 1.000000 |
| rad11                         | 7.96078e-10 | 1.000000 | 7.96078e-10 | 1.000000 |
| PhCH2CCH+H                    | 6.15871e-10 | 1.000000 | 6.15871e-10 | 1.000000 |
| rad36                         | 2.99363e-10 | 1.000000 | 2.99363e-10 | 1.000000 |
| rad37                         | 2.59838e-10 | 1.000000 | 2.59838e-10 | 1.000000 |
| rad22                         | 1.31109e-10 | 1.000000 | 1.31109e-10 | 1.000000 |
| PAH9+H                        | 1.69581e-11 | 1.000000 | 1.69581e-11 | 1.000000 |
| PAH7+H                        | 7.03688e-12 | 1.000000 | 7.03688e-12 | 1.000000 |
| rad38                         | 6.84929e-12 | 1.000000 | 6.84929e-12 | 1.000000 |
| rad13                         | 6.06696e-12 | 1.000000 | 6.06696e-12 | 1.000000 |
| rad5                          | 4.97253e-12 | 1.000000 | 4.97253e-12 | 1.000000 |
| rad60syn                      | 4.87552e-12 | 1.000000 | 4.87552e-12 | 1.000000 |
| rad14                         | 2.68429e-12 | 1.000000 | 2.68429e-12 | 1.000000 |
| rad60anti                     | 2.36677e-12 | 1.000000 | 2.36677e-12 | 1.000000 |
| rad27                         | 2.33667e-12 | 1.000000 | 2.33667e-12 | 1.000000 |
| PAH3+H                        | 1.82474e-12 | 1.000000 | 1.82474e-12 | 1.000000 |
| rad39                         | 1.29206e-12 | 1.000000 | 1.29206e-12 | 1.000000 |
| PhcycC3H3_A+H                 | 8.14906e-13 | 1.000000 | 8.14906e-13 | 1.000000 |
| Benzene+cycloprop-2-enylidene | 5.28015e-13 | 1.000000 | 5.28015e-13 | 1.000000 |
| rad46                         | 3.94700e-13 | 1.000000 | 3.94700e-13 | 1.000000 |
| rad59                         | 3.80859e-13 | 1.000000 | 3.80859e-13 | 1.000000 |
| PAH10+CH3                     | 2.05547e-13 | 1.000000 | 2.05547e-13 | 1.000000 |
| rad18                         | 2.52722e-14 | 1.000000 | 2.52722e-14 | 1.000000 |
| rad43                         | 2.31590e-14 | 1.000000 | 2.31590e-14 | 1.000000 |
| rad25                         | 8.00635e-15 | 1.000000 | 8.00635e-15 | 1.000000 |
| rad33                         | 6.96486e-15 | 1.000000 | 6.96486e-15 | 1.000000 |

|                               |             |         |             |         |
|-------------------------------|-------------|---------|-------------|---------|
| rad62                         | 3.88715e-15 | 1.00000 | 3.88715e-15 | 1.00000 |
| rad20                         | 2.78961e-15 | 1.00000 | 2.78961e-15 | 1.00000 |
| rad50                         | 2.12013e-15 | 1.00000 | 2.12013e-15 | 1.00000 |
| rad21                         | 1.74949e-15 | 1.00000 | 1.74949e-15 | 1.00000 |
| Phenyl+cycC3H4                | 7.87808e-16 | 1.00000 | 0.00000     | 1.00000 |
| rad54                         | 2.77412e-16 | 1.00000 | 2.77412e-16 | 1.00000 |
| rad70                         | 1.11098e-16 | 1.00000 | 1.11098e-16 | 1.00000 |
| rad24                         | 4.47291e-17 | 1.00000 | 4.47291e-17 | 1.00000 |
| rad31                         | 2.59341e-17 | 1.00000 | 2.59341e-17 | 1.00000 |
| rad58                         | 1.98170e-17 | 1.00000 | 1.98170e-17 | 1.00000 |
| rad52                         | 1.22890e-17 | 1.00000 | 1.22890e-17 | 1.00000 |
| PAH1+H                        | 8.05254e-18 | 1.00000 | 8.05254e-18 | 1.00000 |
| rad51                         | 2.81045e-18 | 1.00000 | 2.81045e-18 | 1.00000 |
| rad55                         | 1.68485e-18 | 1.00000 | 1.68485e-18 | 1.00000 |
| rad34                         | 1.10527e-18 | 1.00000 | 1.10527e-18 | 1.00000 |
| rad41                         | 2.69195e-19 | 1.00000 | 2.69195e-19 | 1.00000 |
| PhcycC3H3_B+H                 | 2.42388e-19 | 1.00000 | 2.42388e-19 | 1.00000 |
| rad42                         | 2.00781e-19 | 1.00000 | 2.00781e-19 | 1.00000 |
| rad65                         | 5.09088e-20 | 1.00000 | 5.09088e-20 | 1.00000 |
| Benzene+cycloprop-1-enylidene | 1.03290e-23 | 1.00000 | 1.03290e-23 | 1.00000 |
| rad47                         | 1.84213e-24 | 1.00000 | 1.84213e-24 | 1.00000 |
| rad53                         | 9.49740e-26 | 1.00000 | 9.49740e-26 | 1.00000 |
| rad64                         | 6.68474e-28 | 1.00000 | 6.68474e-28 | 1.00000 |
| rad61                         | 2.22913e-29 | 1.00000 | 2.22913e-29 | 1.00000 |
| rad56                         | 8.92712e-33 | 1.00000 | 8.92712e-33 | 1.00000 |
| rad68syn                      | 1.02748e-33 | 1.00000 | 1.02748e-33 | 1.00000 |
| rad68anti                     | 8.43787e-34 | 1.00000 | 8.43787e-34 | 1.00000 |
| rad19syn                      | 3.07897e-37 | 1.00000 | 3.07897e-37 | 1.00000 |
| rad40syn                      | 8.93270e-39 | 1.00000 | 8.93270e-39 | 1.00000 |
| rad40anti                     | 7.12860e-39 | 1.00000 | 7.12860e-39 | 1.00000 |
| rad73                         | 9.92137e-40 | 1.00000 | 9.92137e-40 | 1.00000 |
| PAH8+H                        | 4.84384e-42 | 1.00000 | 4.84384e-42 | 1.00000 |
| rad71                         | 8.29627e-46 | 1.00000 | 8.29627e-46 | 1.00000 |
| rad8                          | 2.26917e-51 | 1.00000 | 2.26917e-51 | 1.00000 |

100.000000 Pa, 80.000000 K

=====

| Rate constant             | True (fraction)        | Effective (fraction)   |
|---------------------------|------------------------|------------------------|
| Total                     | 4.17084e-16 (1.00 )    | 4.17084e-16 (1.00 )    |
| Formation of rad19        | 4.17084e-16 (1.000 )   | 4.17084e-16 (1.000 )   |
| H-abstraction to cyc2enyl | 8.98751e-27 (2.15e-11) | 8.98751e-27 (2.15e-11) |
| H-abstraction to cyc1enyl | 4.00120e-36 (9.59e-21) | 4.00120e-36 (9.59e-21) |

| species                       | PYtrue      | Cumul    | PYeffective | Cumul    |
|-------------------------------|-------------|----------|-------------|----------|
| Indene+H                      | 0.643325    | 0.643325 | 0.643325    | 0.643325 |
| rad9                          | 0.356159    | 0.999484 | 0.356159    | 0.999484 |
| rad15                         | 0.000418288 | 0.999902 | 0.000418288 | 0.999902 |
| PhCHCCH2+H                    | 8.88249e-05 | 0.999991 | 8.88249e-05 | 0.999991 |
| rad6                          | 4.45863e-06 | 0.999996 | 4.45863e-06 | 0.999996 |
| rad2                          | 1.26959e-06 | 0.999997 | 1.26959e-06 | 0.999997 |
| PhCCH+CH3                     | 6.23562e-07 | 0.999997 | 6.23562e-07 | 0.999997 |
| rad26                         | 4.26581e-07 | 0.999998 | 4.26581e-07 | 0.999998 |
| PhCCH3+H                      | 4.05388e-07 | 0.999998 | 4.05388e-07 | 0.999998 |
| C2H2+PhCH2                    | 3.99169e-07 | 0.999999 | 3.99169e-07 | 0.999999 |
| Ph+MeAc                       | 2.64694e-07 | 0.999999 | 2.64694e-07 | 0.999999 |
| rad67                         | 1.80442e-07 | 0.999999 | 1.80442e-07 | 0.999999 |
| rad10                         | 1.32148e-07 | 0.999999 | 1.32148e-07 | 0.999999 |
| rad1                          | 8.10473e-08 | 0.999999 | 8.10473e-08 | 0.999999 |
| rad35                         | 8.06385e-08 | 0.999999 | 8.06385e-08 | 0.999999 |
| rad23                         | 4.75949e-08 | 0.999999 | 4.75949e-08 | 0.999999 |
| rad3                          | 1.52207e-08 | 0.999999 | 1.52207e-08 | 0.999999 |
| rad4                          | 7.70576e-09 | 1.000000 | 7.70576e-09 | 1.000000 |
| Ph+Allene                     | 4.34132e-09 | 1.000000 | 4.34132e-09 | 1.000000 |
| rad45                         | 4.08938e-09 | 1.000000 | 4.08938e-09 | 1.000000 |
| rad12                         | 1.93910e-09 | 1.000000 | 1.93910e-09 | 1.000000 |
| rad7                          | 1.90623e-09 | 1.000000 | 1.90623e-09 | 1.000000 |
| rad30                         | 1.40663e-09 | 1.000000 | 1.40663e-09 | 1.000000 |
| rad28                         | 1.25733e-09 | 1.000000 | 1.25733e-09 | 1.000000 |
| rad11                         | 8.61295e-10 | 1.000000 | 8.61295e-10 | 1.000000 |
| PhCH2CCH+H                    | 7.42384e-10 | 1.000000 | 7.42384e-10 | 1.000000 |
| rad19anti                     | 7.10284e-10 | 1.000000 | 7.10284e-10 | 1.000000 |
| rad37                         | 3.53898e-10 | 1.000000 | 3.53898e-10 | 1.000000 |
| rad36                         | 2.50367e-10 | 1.000000 | 2.50367e-10 | 1.000000 |
| rad22                         | 1.11245e-10 | 1.000000 | 1.11245e-10 | 1.000000 |
| Benzene+cycloprop-2-enylidene | 2.15484e-11 | 1.000000 | 2.15484e-11 | 1.000000 |
| PAH9+H                        | 2.12028e-11 | 1.000000 | 2.12028e-11 | 1.000000 |
| PAH7+H                        | 1.04707e-11 | 1.000000 | 1.04707e-11 | 1.000000 |
| rad38                         | 8.62072e-12 | 1.000000 | 8.62072e-12 | 1.000000 |

|                               |             |          |             |          |
|-------------------------------|-------------|----------|-------------|----------|
| rad13                         | 6.67470e-12 | 1.000000 | 6.67470e-12 | 1.000000 |
| rad60syn                      | 5.71703e-12 | 1.000000 | 5.71703e-12 | 1.000000 |
| rad5                          | 3.80111e-12 | 1.000000 | 3.80111e-12 | 1.000000 |
| rad60anti                     | 2.77931e-12 | 1.000000 | 2.77931e-12 | 1.000000 |
| rad14                         | 2.60538e-12 | 1.000000 | 2.60538e-12 | 1.000000 |
| rad27                         | 2.27013e-12 | 1.000000 | 2.27013e-12 | 1.000000 |
| PAH3+H                        | 2.18191e-12 | 1.000000 | 2.18191e-12 | 1.000000 |
| rad39                         | 2.10202e-12 | 1.000000 | 2.10202e-12 | 1.000000 |
| PhcycC3H3_A+H                 | 9.87646e-13 | 1.000000 | 9.87646e-13 | 1.000000 |
| rad46                         | 4.97597e-13 | 1.000000 | 4.97597e-13 | 1.000000 |
| rad59                         | 4.54150e-13 | 1.000000 | 4.54150e-13 | 1.000000 |
| PAH10+CH3                     | 2.97016e-13 | 1.000000 | 2.97016e-13 | 1.000000 |
| rad43                         | 3.16728e-14 | 1.000000 | 3.16728e-14 | 1.000000 |
| rad18                         | 2.11443e-14 | 1.000000 | 2.11443e-14 | 1.000000 |
| rad25                         | 8.37602e-15 | 1.000000 | 8.37602e-15 | 1.000000 |
| rad33                         | 7.65640e-15 | 1.000000 | 7.65640e-15 | 1.000000 |
| rad62                         | 5.37002e-15 | 1.000000 | 5.37002e-15 | 1.000000 |
| rad50                         | 2.77370e-15 | 1.000000 | 2.77370e-15 | 1.000000 |
| rad20                         | 2.39982e-15 | 1.000000 | 2.39982e-15 | 1.000000 |
| rad21                         | 1.50143e-15 | 1.000000 | 1.50143e-15 | 1.000000 |
| Phenyl+cycC3H4                | 1.32430e-15 | 1.000000 | 0.000000    | 1.000000 |
| rad54                         | 4.11789e-16 | 1.000000 | 4.11789e-16 | 1.000000 |
| rad70                         | 1.43191e-16 | 1.000000 | 1.43191e-16 | 1.000000 |
| rad24                         | 3.68345e-17 | 1.000000 | 3.68345e-17 | 1.000000 |
| rad31                         | 2.66408e-17 | 1.000000 | 2.66408e-17 | 1.000000 |
| rad58                         | 2.54223e-17 | 1.000000 | 2.54223e-17 | 1.000000 |
| rad52                         | 1.64795e-17 | 1.000000 | 1.64795e-17 | 1.000000 |
| PAH1+H                        | 1.27407e-17 | 1.000000 | 1.27407e-17 | 1.000000 |
| rad51                         | 3.87547e-18 | 1.000000 | 3.87547e-18 | 1.000000 |
| rad55                         | 2.58910e-18 | 1.000000 | 2.58910e-18 | 1.000000 |
| PhcycC3H3_B+H                 | 1.95629e-18 | 1.000000 | 1.95629e-18 | 1.000000 |
| rad34                         | 1.49823e-18 | 1.000000 | 1.49823e-18 | 1.000000 |
| rad41                         | 4.37468e-19 | 1.000000 | 4.37468e-19 | 1.000000 |
| rad42                         | 3.19992e-19 | 1.000000 | 3.19992e-19 | 1.000000 |
| rad65                         | 7.20208e-20 | 1.000000 | 7.20208e-20 | 1.000000 |
| Benzene+cycloprop-1-enylidene | 9.59328e-21 | 1.000000 | 9.59328e-21 | 1.000000 |
| rad47                         | 1.93187e-24 | 1.000000 | 1.93187e-24 | 1.000000 |
| rad53                         | 3.15998e-25 | 1.000000 | 3.15998e-25 | 1.000000 |
| rad64                         | 2.65984e-27 | 1.000000 | 2.65984e-27 | 1.000000 |
| rad61                         | 1.01756e-28 | 1.000000 | 1.01756e-28 | 1.000000 |
| rad56                         | 4.47386e-32 | 1.000000 | 4.47386e-32 | 1.000000 |
| rad68syn                      | 5.07524e-33 | 1.000000 | 5.07524e-33 | 1.000000 |
| rad68anti                     | 4.16439e-33 | 1.000000 | 4.16439e-33 | 1.000000 |
| rad19syn                      | 5.56894e-37 | 1.000000 | 5.56894e-37 | 1.000000 |
| rad40syn                      | 4.96375e-38 | 1.000000 | 4.96375e-38 | 1.000000 |
| rad40anti                     | 3.95934e-38 | 1.000000 | 3.95934e-38 | 1.000000 |
| rad73                         | 5.38713e-39 | 1.000000 | 5.38713e-39 | 1.000000 |
| PAH8+H                        | 2.83616e-41 | 1.000000 | 2.83616e-41 | 1.000000 |
| rad71                         | 5.09062e-45 | 1.000000 | 5.09062e-45 | 1.000000 |
| rad8                          | 2.15340e-51 | 1.000000 | 2.15340e-51 | 1.000000 |

100.000000 Pa, 90.0000000 K

=====

| Rate constant             | True (fraction)        | Effective (fraction)   |
|---------------------------|------------------------|------------------------|
| Total                     | 7.74016e-16 (1.00 )    | 7.74016e-16 (1.00 )    |
| Formation of rad19        | 7.74016e-16 (1.000 )   | 7.74016e-16 (1.000 )   |
| H-abstraction to cyc2enyl | 2.91736e-25 (3.77e-10) | 2.91736e-25 (3.77e-10) |
| H-abstraction to cyclenyl | 1.47814e-33 (1.91e-18) | 1.47814e-33 (1.91e-18) |

| species    | PYtrue      | Cumul    | PYeffective | Cumul    |
|------------|-------------|----------|-------------|----------|
| Indene+H   | 0.688759    | 0.688759 | 0.688759    | 0.688759 |
| rad9       | 0.310773    | 0.999532 | 0.310773    | 0.999532 |
| rad15      | 0.000358404 | 0.999890 | 0.000358404 | 0.999890 |
| PhCHCCH2+H | 9.95910e-05 | 0.999990 | 9.95910e-05 | 0.999990 |
| rad6       | 5.03315e-06 | 0.999995 | 5.03315e-06 | 0.999995 |
| rad2       | 1.26139e-06 | 0.999996 | 1.26139e-06 | 0.999996 |
| PhCCH+CH3  | 7.62838e-07 | 0.999997 | 7.62838e-07 | 0.999997 |
| PhCCCH3+H  | 4.97177e-07 | 0.999998 | 4.97177e-07 | 0.999998 |
| rad26      | 4.58151e-07 | 0.999998 | 4.58151e-07 | 0.999998 |
| C2H2+PhCH2 | 4.53688e-07 | 0.999998 | 4.53688e-07 | 0.999998 |
| Ph+MeAc    | 3.28489e-07 | 0.999999 | 3.28489e-07 | 0.999999 |
| rad67      | 2.05002e-07 | 0.999999 | 2.05002e-07 | 0.999999 |
| rad10      | 1.30033e-07 | 0.999999 | 1.30033e-07 | 0.999999 |
| rad35      | 9.14353e-08 | 0.999999 | 9.14353e-08 | 0.999999 |
| rad1       | 8.07573e-08 | 0.999999 | 8.07573e-08 | 0.999999 |
| rad23      | 4.11449e-08 | 0.999999 | 4.11449e-08 | 0.999999 |
| rad3       | 1.49705e-08 | 0.999999 | 1.49705e-08 | 0.999999 |
| rad4       | 7.58426e-09 | 0.999999 | 7.58426e-09 | 0.999999 |



|                               |             |          |             |          |
|-------------------------------|-------------|----------|-------------|----------|
| Ph+Allene                     | 5.12186e-09 | 0.999999 | 5.12186e-09 | 0.999999 |
| rad45                         | 3.42112e-09 | 0.999999 | 3.42112e-09 | 0.999999 |
| rad7                          | 2.09290e-09 | 0.999999 | 2.09290e-09 | 0.999999 |
| rad12                         | 1.68123e-09 | 0.999999 | 1.68123e-09 | 0.999999 |
| rad28                         | 1.61812e-09 | 0.999999 | 1.61812e-09 | 0.999999 |
| rad30                         | 1.59560e-09 | 0.999999 | 1.59560e-09 | 0.999999 |
| rad11                         | 9.27724e-10 | 0.999999 | 9.27724e-10 | 0.999999 |
| PhCH2CCH+H                    | 8.81528e-10 | 0.999999 | 8.81528e-10 | 0.999999 |
| rad19anti                     | 5.95008e-10 | 0.999999 | 5.95008e-10 | 0.999999 |
| rad37                         | 4.65314e-10 | 0.999999 | 4.65314e-10 | 0.999999 |
| Benzene+cycloprop-2-enylidene | 3.76912e-10 | 0.999999 | 3.76912e-10 | 0.999999 |
| rad36                         | 2.09444e-10 | 0.999999 | 2.09444e-10 | 0.999999 |
| rad22                         | 9.57255e-11 | 0.999999 | 9.57255e-11 | 0.999999 |
| PAH9+H                        | 2.57392e-11 | 0.999999 | 2.57392e-11 | 0.999999 |
| PAH7+H                        | 1.51666e-11 | 0.999999 | 1.51666e-11 | 0.999999 |
| rad38                         | 1.05584e-11 | 0.999999 | 1.05584e-11 | 0.999999 |
| rad13                         | 7.26235e-12 | 0.999999 | 7.26235e-12 | 0.999999 |
| rad60syn                      | 6.59924e-12 | 0.999999 | 6.59924e-12 | 0.999999 |
| rad39                         | 3.24810e-12 | 0.999999 | 3.24810e-12 | 0.999999 |
| rad60anti                     | 3.21303e-12 | 0.999999 | 3.21303e-12 | 0.999999 |
| rad5                          | 2.96273e-12 | 0.999999 | 2.96273e-12 | 0.999999 |
| PAH3+H                        | 2.57060e-12 | 0.999999 | 2.57060e-12 | 0.999999 |
| rad14                         | 2.50155e-12 | 0.999999 | 2.50155e-12 | 0.999999 |
| rad27                         | 2.18230e-12 | 0.999999 | 2.18230e-12 | 0.999999 |
| PhcycC3H3_A+H                 | 1.20588e-12 | 0.999999 | 1.20588e-12 | 0.999999 |
| rad46                         | 6.09992e-13 | 0.999999 | 6.09992e-13 | 0.999999 |
| rad59                         | 5.33491e-13 | 0.999999 | 5.33491e-13 | 0.999999 |
| PAH10+CH3                     | 4.15921e-13 | 0.999999 | 4.15921e-13 | 0.999999 |
| rad43                         | 4.19995e-14 | 0.999999 | 4.19995e-14 | 0.999999 |
| rad18                         | 1.85168e-14 | 0.999999 | 1.85168e-14 | 0.999999 |
| rad25                         | 8.79041e-15 | 0.999999 | 8.79041e-15 | 0.999999 |
| rad33                         | 8.32980e-15 | 0.999999 | 8.32980e-15 | 0.999999 |
| rad62                         | 7.18094e-15 | 0.999999 | 7.18094e-15 | 0.999999 |
| rad50                         | 3.53038e-15 | 0.999999 | 3.53038e-15 | 0.999999 |
| Phenyl+cycC3H4                | 2.14283e-15 | 0.999999 | 0.000000    | 0.999999 |
| rad20                         | 2.12143e-15 | 0.999999 | 2.12143e-15 | 0.999999 |
| rad21                         | 1.32463e-15 | 0.999999 | 1.32463e-15 | 0.999999 |
| rad54                         | 5.92699e-16 | 0.999999 | 5.92699e-16 | 0.999999 |
| rad70                         | 1.82380e-16 | 0.999999 | 1.82380e-16 | 0.999999 |
| rad58                         | 3.22529e-17 | 0.999999 | 3.22529e-17 | 0.999999 |
| rad24                         | 3.04688e-17 | 0.999999 | 3.04688e-17 | 0.999999 |
| rad31                         | 2.69749e-17 | 0.999999 | 2.69749e-17 | 0.999999 |
| rad52                         | 2.15174e-17 | 0.999999 | 2.15174e-17 | 0.999999 |
| PAH1+H                        | 1.96402e-17 | 0.999999 | 1.96402e-17 | 0.999999 |
| PhcycC3H3_B+H                 | 1.03222e-17 | 0.999999 | 1.03222e-17 | 0.999999 |
| rad51                         | 5.20984e-18 | 0.999999 | 5.20984e-18 | 0.999999 |
| rad55                         | 3.86660e-18 | 0.999999 | 3.86660e-18 | 0.999999 |
| rad34                         | 2.01155e-18 | 0.999999 | 2.01155e-18 | 0.999999 |
| Benzene+cycloprop-1-enylidene | 1.90970e-18 | 0.999999 | 1.90970e-18 | 0.999999 |
| rad41                         | 6.92339e-19 | 0.999999 | 6.92339e-19 | 0.999999 |
| rad42                         | 4.95453e-19 | 0.999999 | 4.95453e-19 | 0.999999 |
| rad65                         | 9.91172e-20 | 0.999999 | 9.91172e-20 | 0.999999 |
| rad47                         | 2.00807e-24 | 0.999999 | 2.00807e-24 | 0.999999 |
| rad53                         | 1.05789e-24 | 0.999999 | 1.05789e-24 | 0.999999 |
| rad64                         | 1.12253e-26 | 0.999999 | 1.12253e-26 | 0.999999 |
| rad61                         | 6.27840e-28 | 0.999999 | 6.27840e-28 | 0.999999 |
| rad56                         | 3.09241e-31 | 0.999999 | 3.09241e-31 | 0.999999 |
| rad68syn                      | 3.89605e-32 | 0.999999 | 3.89605e-32 | 0.999999 |
| rad68anti                     | 3.19244e-32 | 0.999999 | 3.19244e-32 | 0.999999 |
| rad19syn                      | 1.05592e-36 | 0.999999 | 1.05592e-36 | 0.999999 |
| rad40syn                      | 4.55667e-37 | 0.999999 | 4.55667e-37 | 0.999999 |
| rad40anti                     | 3.63261e-37 | 0.999999 | 3.63261e-37 | 0.999999 |
| rad73                         | 4.71850e-38 | 0.999999 | 4.71850e-38 | 0.999999 |
| PAH8+H                        | 2.80226e-40 | 0.999999 | 2.80226e-40 | 0.999999 |
| rad71                         | 5.16879e-44 | 0.999999 | 5.16879e-44 | 0.999999 |
| rad8                          | 2.18404e-51 | 0.999999 | 2.18404e-51 | 0.999999 |

100.000000 Pa, 100.000000 K

| Rate constant             | True (fraction)        | Effective (fraction)   |
|---------------------------|------------------------|------------------------|
| Total                     | 1.28255e-15 (1.00 )    | 1.28255e-15 (1.00 )    |
| Formation of rad19        | 1.28255e-15 (1.000 )   | 1.28255e-15 (1.000 )   |
| H-abstraction to cyc2enyl | 4.68359e-24 (3.65e-09) | 4.68359e-24 (3.65e-09) |
| H-abstraction to cyclenyl | 1.66242e-31 (1.30e-16) | 1.66242e-31 (1.30e-16) |

  

| species  | PYtrue   | Cumul    | PYeffective | Cumul    |
|----------|----------|----------|-------------|----------|
| Indene+H | 0.728211 | 0.728211 | 0.728211    | 0.728211 |
| rad9     | 0.271360 | 0.999571 | 0.271360    | 0.999571 |

|                               |             |          |             |          |
|-------------------------------|-------------|----------|-------------|----------|
| rad15                         | 0.000308065 | 0.999879 | 0.000308065 | 0.999879 |
| PhCCCH2+H                     | 0.000110315 | 0.999989 | 0.000110315 | 0.999989 |
| rad6                          | 5.60517e-06 | 0.999995 | 5.60517e-06 | 0.999995 |
| rad2                          | 1.23712e-06 | 0.999996 | 1.23712e-06 | 0.999996 |
| PhCCH+CH3                     | 9.09602e-07 | 0.999997 | 9.09602e-07 | 0.999997 |
| PhCCCH3+H                     | 5.94795e-07 | 0.999998 | 5.94795e-07 | 0.999998 |
| C2H2+PhCH2                    | 5.09685e-07 | 0.999998 | 5.09685e-07 | 0.999998 |
| rad26                         | 4.84260e-07 | 0.999999 | 4.84260e-07 | 0.999999 |
| Ph+MeAc                       | 3.97776e-07 | 0.999999 | 3.97776e-07 | 0.999999 |
| rad67                         | 2.30175e-07 | 0.999999 | 2.30175e-07 | 0.999999 |
| rad10                         | 1.26477e-07 | 0.999999 | 1.26477e-07 | 0.999999 |
| rad35                         | 1.02457e-07 | 1.000000 | 1.02457e-07 | 1.000000 |
| rad1                          | 7.94572e-08 | 1.000000 | 7.94572e-08 | 1.000000 |
| rad23                         | 3.54821e-08 | 1.000000 | 3.54821e-08 | 1.000000 |
| rad3                          | 1.45529e-08 | 1.000000 | 1.45529e-08 | 1.000000 |
| rad4                          | 7.37837e-09 | 1.000000 | 7.37837e-09 | 1.000000 |
| Ph+Allene                     | 5.98014e-09 | 1.000000 | 5.98014e-09 | 1.000000 |
| Benzene+cycloprop-2-enylidene | 3.65179e-09 | 1.000000 | 3.65179e-09 | 1.000000 |
| rad45                         | 2.86787e-09 | 1.000000 | 2.86787e-09 | 1.000000 |
| rad7                          | 2.27545e-09 | 1.000000 | 2.27545e-09 | 1.000000 |
| rad28                         | 2.02824e-09 | 1.000000 | 2.02824e-09 | 1.000000 |
| rad30                         | 1.78880e-09 | 1.000000 | 1.78880e-09 | 1.000000 |
| rad12                         | 1.46258e-09 | 1.000000 | 1.46258e-09 | 1.000000 |
| PhCH2CCH+H                    | 1.03615e-09 | 1.000000 | 1.03615e-09 | 1.000000 |
| rad11                         | 9.94508e-10 | 1.000000 | 9.94508e-10 | 1.000000 |
| rad37                         | 5.96114e-10 | 1.000000 | 5.96114e-10 | 1.000000 |
| rad19anti                     | 5.02419e-10 | 1.000000 | 5.02419e-10 | 1.000000 |
| rad36                         | 1.75594e-10 | 1.000000 | 1.75594e-10 | 1.000000 |
| rad22                         | 8.33854e-11 | 1.000000 | 8.33854e-11 | 1.000000 |
| PAH9+H                        | 3.06033e-11 | 1.000000 | 3.06033e-11 | 1.000000 |
| PAH7+H                        | 2.15147e-11 | 1.000000 | 2.15147e-11 | 1.000000 |
| rad38                         | 1.26883e-11 | 1.000000 | 1.26883e-11 | 1.000000 |
| rad13                         | 7.83705e-12 | 1.000000 | 7.83705e-12 | 1.000000 |
| rad60syn                      | 7.53332e-12 | 1.000000 | 7.53332e-12 | 1.000000 |
| rad39                         | 4.83653e-12 | 1.000000 | 4.83653e-12 | 1.000000 |
| rad60anti                     | 3.67357e-12 | 1.000000 | 3.67357e-12 | 1.000000 |
| PAH3+H                        | 2.99782e-12 | 1.000000 | 2.99782e-12 | 1.000000 |
| rad14                         | 2.38213e-12 | 1.000000 | 2.38213e-12 | 1.000000 |
| rad5                          | 2.34622e-12 | 1.000000 | 2.34622e-12 | 1.000000 |
| rad27                         | 2.08087e-12 | 1.000000 | 2.08087e-12 | 1.000000 |
| PhcycC3H3_A+H                 | 1.48254e-12 | 1.000000 | 1.48254e-12 | 1.000000 |
| rad46                         | 7.33176e-13 | 1.000000 | 7.33176e-13 | 1.000000 |
| rad59                         | 6.20238e-13 | 1.000000 | 6.20238e-13 | 1.000000 |
| PAH10+CH3                     | 5.69704e-13 | 1.000000 | 5.69704e-13 | 1.000000 |
| rad43                         | 5.44785e-14 | 1.000000 | 5.44785e-14 | 1.000000 |
| rad18                         | 1.66969e-14 | 1.000000 | 1.66969e-14 | 1.000000 |
| rad62                         | 9.38186e-15 | 1.000000 | 9.38186e-15 | 1.000000 |
| rad25                         | 9.22857e-15 | 1.000000 | 9.22857e-15 | 1.000000 |
| rad33                         | 8.99307e-15 | 1.000000 | 8.99307e-15 | 1.000000 |
| rad50                         | 4.40901e-15 | 1.000000 | 4.40901e-15 | 1.000000 |
| Phenyl+cycC3H4                | 3.36905e-15 | 1.000000 | 0.000000    | 1.000000 |
| rad20                         | 1.91301e-15 | 1.000000 | 1.91301e-15 | 1.000000 |
| rad21                         | 1.19253e-15 | 1.000000 | 1.19253e-15 | 1.000000 |
| rad54                         | 8.35556e-16 | 1.000000 | 8.35556e-16 | 1.000000 |
| rad70                         | 2.30744e-16 | 1.000000 | 2.30744e-16 | 1.000000 |
| Benzene+cycloprop-1-enylidene | 1.29619e-16 | 1.000000 | 1.29619e-16 | 1.000000 |
| rad58                         | 4.06580e-17 | 1.000000 | 4.06580e-17 | 1.000000 |
| PhcycC3H3_B+H                 | 4.05378e-17 | 1.000000 | 4.05378e-17 | 1.000000 |
| PAH1+H                        | 2.97692e-17 | 1.000000 | 2.97692e-17 | 1.000000 |
| rad52                         | 2.75931e-17 | 1.000000 | 2.75931e-17 | 1.000000 |
| rad31                         | 2.70304e-17 | 1.000000 | 2.70304e-17 | 1.000000 |
| rad24                         | 2.53347e-17 | 1.000000 | 2.53347e-17 | 1.000000 |
| rad51                         | 6.88751e-18 | 1.000000 | 6.88751e-18 | 1.000000 |
| rad55                         | 5.66924e-18 | 1.000000 | 5.66924e-18 | 1.000000 |
| rad34                         | 2.68899e-18 | 1.000000 | 2.68899e-18 | 1.000000 |
| rad41                         | 1.07577e-18 | 1.000000 | 1.07577e-18 | 1.000000 |
| rad42                         | 7.51885e-19 | 1.000000 | 7.51885e-19 | 1.000000 |
| rad65                         | 1.33978e-19 | 1.000000 | 1.33978e-19 | 1.000000 |
| rad53                         | 3.40773e-24 | 1.000000 | 3.40773e-24 | 1.000000 |
| rad47                         | 2.07551e-24 | 1.000000 | 2.07551e-24 | 1.000000 |
| rad64                         | 4.80926e-26 | 1.000000 | 4.80926e-26 | 1.000000 |
| rad61                         | 4.97682e-27 | 1.000000 | 4.97682e-27 | 1.000000 |
| rad56                         | 2.99588e-30 | 1.000000 | 2.99588e-30 | 1.000000 |
| rad68syn                      | 4.97217e-31 | 1.000000 | 4.97217e-31 | 1.000000 |
| rad68anti                     | 4.05913e-31 | 1.000000 | 4.05913e-31 | 1.000000 |
| rad40syn                      | 9.77356e-36 | 1.000000 | 9.77356e-36 | 1.000000 |
| rad40anti                     | 7.76144e-36 | 1.000000 | 7.76144e-36 | 1.000000 |
| rad19syn                      | 2.09016e-36 | 1.000000 | 2.09016e-36 | 1.000000 |
| rad73                         | 8.63143e-37 | 1.000000 | 8.63143e-37 | 1.000000 |
| PAH8+H                        | 6.61537e-39 | 1.000000 | 6.61537e-39 | 1.000000 |

|       |             |          |             |          |
|-------|-------------|----------|-------------|----------|
| rad71 | 1.21303e-42 | 1.000000 | 1.21303e-42 | 1.000000 |
| rad8  | 2.33047e-51 | 1.000000 | 2.33047e-51 | 1.000000 |

100.000000 Pa, 110.000000 K

=====

| Rate constant             | True (fraction)        | Effective (fraction)   |
|---------------------------|------------------------|------------------------|
| Total                     | 1.95524e-15 (1.00 )    | 1.95524e-15 (1.00 )    |
| Formation of rad19        | 1.95524e-15 (1.000 )   | 1.95524e-15 (1.000 )   |
| H-abstraction to cyc2enyl | 4.50936e-23 (2.31e-08) | 4.50936e-23 (2.31e-08) |
| H-abstraction to cyclenyl | 7.87782e-30 (4.03e-15) | 7.87782e-30 (4.03e-15) |

| species                       | PYtrue      | Cumul    | PYeffective | Cumul    |
|-------------------------------|-------------|----------|-------------|----------|
| Indene+H                      | 0.762593    | 0.762593 | 0.762593    | 0.762593 |
| rad9                          | 0.237009    | 0.999602 | 0.237009    | 0.999602 |
| rad15                         | 0.000265374 | 0.999867 | 0.000265374 | 0.999867 |
| PhCHCCH2+H                    | 0.000121090 | 0.999988 | 0.000121090 | 0.999988 |
| rad6                          | 6.17803e-06 | 0.999995 | 6.17803e-06 | 0.999995 |
| rad2                          | 1.20095e-06 | 0.999996 | 1.20095e-06 | 0.999996 |
| PhCCH+CH3                     | 1.06365e-06 | 0.999997 | 1.06365e-06 | 0.999997 |
| PhCCCH3+H                     | 6.98288e-07 | 0.999998 | 6.98288e-07 | 0.999998 |
| C2H2+PhCH2                    | 5.67748e-07 | 0.999998 | 5.67748e-07 | 0.999998 |
| rad26                         | 5.05200e-07 | 0.999999 | 5.05200e-07 | 0.999999 |
| Ph+MeAc                       | 4.72820e-07 | 0.999999 | 4.72820e-07 | 0.999999 |
| rad67                         | 2.56202e-07 | 0.999999 | 2.56202e-07 | 0.999999 |
| rad10                         | 1.21897e-07 | 1.000000 | 1.21897e-07 | 1.000000 |
| rad35                         | 1.13806e-07 | 1.000000 | 1.13806e-07 | 1.000000 |
| rad1                          | 7.74050e-08 | 1.000000 | 7.74050e-08 | 1.000000 |
| rad23                         | 3.05933e-08 | 1.000000 | 3.05933e-08 | 1.000000 |
| Benzene+cycloprop-2-enylidene | 2.30629e-08 | 1.000000 | 2.30629e-08 | 1.000000 |
| rad3                          | 1.40166e-08 | 1.000000 | 1.40166e-08 | 1.000000 |
| rad4                          | 7.11263e-09 | 1.000000 | 7.11263e-09 | 1.000000 |
| Ph+Allene                     | 6.93334e-09 | 1.000000 | 6.93334e-09 | 1.000000 |
| rad28                         | 2.49170e-09 | 1.000000 | 2.49170e-09 | 1.000000 |
| rad7                          | 2.45563e-09 | 1.000000 | 2.45563e-09 | 1.000000 |
| rad45                         | 2.41205e-09 | 1.000000 | 2.41205e-09 | 1.000000 |
| rad30                         | 1.98811e-09 | 1.000000 | 1.98811e-09 | 1.000000 |
| rad12                         | 1.27532e-09 | 1.000000 | 1.27532e-09 | 1.000000 |
| PhCH2CCH+H                    | 1.20968e-09 | 1.000000 | 1.20968e-09 | 1.000000 |
| rad11                         | 1.06149e-09 | 1.000000 | 1.06149e-09 | 1.000000 |
| rad37                         | 7.48798e-10 | 1.000000 | 7.48798e-10 | 1.000000 |
| rad19anti                     | 4.26794e-10 | 1.000000 | 4.26794e-10 | 1.000000 |
| rad36                         | 1.47729e-10 | 1.000000 | 1.47729e-10 | 1.000000 |
| rad22                         | 7.34813e-11 | 1.000000 | 7.34813e-11 | 1.000000 |
| PAH9+H                        | 3.58468e-11 | 1.000000 | 3.58468e-11 | 1.000000 |
| PAH7+H                        | 3.00336e-11 | 1.000000 | 3.00336e-11 | 1.000000 |
| rad38                         | 1.50448e-11 | 1.000000 | 1.50448e-11 | 1.000000 |
| rad60syn                      | 8.53143e-12 | 1.000000 | 8.53143e-12 | 1.000000 |
| rad13                         | 8.40477e-12 | 1.000000 | 8.40477e-12 | 1.000000 |
| rad39                         | 7.00906e-12 | 1.000000 | 7.00906e-12 | 1.000000 |
| rad60anti                     | 4.16710e-12 | 1.000000 | 4.16710e-12 | 1.000000 |
| PAH3+H                        | 3.47182e-12 | 1.000000 | 3.47182e-12 | 1.000000 |
| rad14                         | 2.25357e-12 | 1.000000 | 2.25357e-12 | 1.000000 |
| rad27                         | 1.97124e-12 | 1.000000 | 1.97124e-12 | 1.000000 |
| rad5                          | 1.88227e-12 | 1.000000 | 1.88227e-12 | 1.000000 |
| PhcycC3H3_A+H                 | 1.83516e-12 | 1.000000 | 1.83516e-12 | 1.000000 |
| rad46                         | 8.68896e-13 | 1.000000 | 8.68896e-13 | 1.000000 |
| PAH10+CH3                     | 7.68242e-13 | 1.000000 | 7.68242e-13 | 1.000000 |
| rad59                         | 7.15965e-13 | 1.000000 | 7.15965e-13 | 1.000000 |
| rad43                         | 6.95436e-14 | 1.000000 | 6.95436e-14 | 1.000000 |
| rad18                         | 1.53591e-14 | 1.000000 | 1.53591e-14 | 1.000000 |
| rad62                         | 1.20519e-14 | 1.000000 | 1.20519e-14 | 1.000000 |
| rad25                         | 9.68206e-15 | 1.000000 | 9.68206e-15 | 1.000000 |
| rad33                         | 9.65296e-15 | 1.000000 | 9.65296e-15 | 1.000000 |
| rad50                         | 5.43453e-15 | 1.000000 | 5.43453e-15 | 1.000000 |
| Phenyl+cycC3H4                | 5.18629e-15 | 1.000000 | 0.000000    | 1.000000 |
| Benzene+cycloprop-1-enylidene | 4.02908e-15 | 1.000000 | 4.02908e-15 | 1.000000 |
| rad20                         | 1.75211e-15 | 1.000000 | 1.75211e-15 | 1.000000 |
| rad54                         | 1.16197e-15 | 1.000000 | 1.16197e-15 | 1.000000 |
| rad21                         | 1.09075e-15 | 1.000000 | 1.09075e-15 | 1.000000 |
| rad70                         | 2.91075e-16 | 1.000000 | 2.91075e-16 | 1.000000 |
| PhcycC3H3_B+H                 | 1.29136e-16 | 1.000000 | 1.29136e-16 | 1.000000 |
| rad58                         | 5.11017e-17 | 1.000000 | 5.11017e-17 | 1.000000 |
| PAH1+H                        | 4.46519e-17 | 1.000000 | 4.46519e-17 | 1.000000 |
| rad52                         | 3.49602e-17 | 1.000000 | 3.49602e-17 | 1.000000 |
| rad31                         | 2.68781e-17 | 1.000000 | 2.68781e-17 | 1.000000 |
| rad24                         | 2.11865e-17 | 1.000000 | 2.11865e-17 | 1.000000 |
| rad51                         | 9.00958e-18 | 1.000000 | 9.00958e-18 | 1.000000 |
| rad55                         | 8.22048e-18 | 1.000000 | 8.22048e-18 | 1.000000 |

|           |             |          |             |          |
|-----------|-------------|----------|-------------|----------|
| rad34     | 3.59275e-18 | 1.000000 | 3.59275e-18 | 1.000000 |
| rad41     | 1.65053e-18 | 1.000000 | 1.65053e-18 | 1.000000 |
| rad42     | 1.12517e-18 | 1.000000 | 1.12517e-18 | 1.000000 |
| rad65     | 1.79066e-19 | 1.000000 | 1.79066e-19 | 1.000000 |
| rad53     | 1.03280e-23 | 1.000000 | 1.03280e-23 | 1.000000 |
| rad47     | 2.13811e-24 | 1.000000 | 2.13811e-24 | 1.000000 |
| rad64     | 1.99228e-25 | 1.000000 | 1.99228e-25 | 1.000000 |
| rad61     | 4.07953e-26 | 1.000000 | 4.07953e-26 | 1.000000 |
| rad56     | 3.27505e-29 | 1.000000 | 3.27505e-29 | 1.000000 |
| rad68syn  | 7.33363e-30 | 1.000000 | 7.33363e-30 | 1.000000 |
| rad68anti | 5.95382e-30 | 1.000000 | 5.95382e-30 | 1.000000 |
| rad40syn  | 3.91141e-34 | 1.000000 | 3.91141e-34 | 1.000000 |
| rad40anti | 3.10658e-34 | 1.000000 | 3.10658e-34 | 1.000000 |
| rad73     | 2.42339e-35 | 1.000000 | 2.42339e-35 | 1.000000 |
| rad19syn  | 4.31767e-36 | 1.000000 | 4.31767e-36 | 1.000000 |
| PAH8+H    | 3.76511e-37 | 1.000000 | 3.76511e-37 | 1.000000 |
| rad71     | 6.77966e-41 | 1.000000 | 6.77966e-41 | 1.000000 |
| rad8      | 2.58960e-51 | 1.000000 | 2.58960e-51 | 1.000000 |

100.000000 Pa, 120.000000 K

=====

| Rate constant             | True (fraction)        | Effective (fraction)   |
|---------------------------|------------------------|------------------------|
| Total                     | 2.79817e-15 (1.00 )    | 2.79817e-15 (1.00 )    |
| Formation of rad19        | 2.79817e-15 (1.000 )   | 2.79817e-15 (1.000 )   |
| H-abstraction to cyc2enyl | 2.96039e-22 (1.06e-07) | 2.96039e-22 (1.06e-07) |
| H-abstraction to cyc1enyl | 1.95323e-28 (6.98e-14) | 1.95323e-28 (6.98e-14) |

| species                       | PYtrue      | Cumul    | PYeffective | Cumul    |
|-------------------------------|-------------|----------|-------------|----------|
| Indene+H                      | 0.792642    | 0.792642 | 0.792642    | 0.792642 |
| rad9                          | 0.206985    | 0.999627 | 0.206985    | 0.999627 |
| rad15                         | 0.000228923 | 0.999856 | 0.000228923 | 0.999856 |
| PhCHCCH2+H                    | 0.000132005 | 0.999988 | 0.000132005 | 0.999988 |
| rad6                          | 6.75501e-06 | 0.999995 | 6.75501e-06 | 0.999995 |
| PhCCH+CH3                     | 1.22504e-06 | 0.999996 | 1.22504e-06 | 0.999996 |
| rad2                          | 1.15608e-06 | 0.999997 | 1.15608e-06 | 0.999997 |
| PhCCCH3+H                     | 8.07890e-07 | 0.999998 | 8.07890e-07 | 0.999998 |
| C2H2+PhCH2                    | 6.28502e-07 | 0.999998 | 6.28502e-07 | 0.999998 |
| Ph+MeAc                       | 5.54040e-07 | 0.999999 | 5.54040e-07 | 0.999999 |
| rad26                         | 5.21213e-07 | 0.999999 | 5.21213e-07 | 0.999999 |
| rad67                         | 2.83335e-07 | 1.000000 | 2.83335e-07 | 1.000000 |
| rad35                         | 1.25591e-07 | 1.000000 | 1.25591e-07 | 1.000000 |
| rad10                         | 1.16602e-07 | 1.000000 | 1.16602e-07 | 1.000000 |
| Benzene+cycloprop-2-enylidene | 1.05797e-07 | 1.000000 | 1.05797e-07 | 1.000000 |
| rad1                          | 7.48004e-08 | 1.000000 | 7.48004e-08 | 1.000000 |
| rad23                         | 2.64175e-08 | 1.000000 | 2.64175e-08 | 1.000000 |
| rad3                          | 1.33985e-08 | 1.000000 | 1.33985e-08 | 1.000000 |
| Ph+Allene                     | 8.00234e-09 | 1.000000 | 8.00234e-09 | 1.000000 |
| rad4                          | 6.80552e-09 | 1.000000 | 6.80552e-09 | 1.000000 |
| rad28                         | 3.01340e-09 | 1.000000 | 3.01340e-09 | 1.000000 |
| rad7                          | 2.63503e-09 | 1.000000 | 2.63503e-09 | 1.000000 |
| rad30                         | 2.19549e-09 | 1.000000 | 2.19549e-09 | 1.000000 |
| rad45                         | 2.03738e-09 | 1.000000 | 2.03738e-09 | 1.000000 |
| PhCH2CCH+H                    | 1.40630e-09 | 1.000000 | 1.40630e-09 | 1.000000 |
| rad11                         | 1.12885e-09 | 1.000000 | 1.12885e-09 | 1.000000 |
| rad12                         | 1.11377e-09 | 1.000000 | 1.11377e-09 | 1.000000 |
| rad37                         | 9.26415e-10 | 1.000000 | 9.26415e-10 | 1.000000 |
| rad19anti                     | 3.64230e-10 | 1.000000 | 3.64230e-10 | 1.000000 |
| rad36                         | 1.24843e-10 | 1.000000 | 1.24843e-10 | 1.000000 |
| rad22                         | 6.54942e-11 | 1.000000 | 6.54942e-11 | 1.000000 |
| PAH9+H                        | 4.15364e-11 | 1.000000 | 4.15364e-11 | 1.000000 |
| PAH7+H                        | 4.14201e-11 | 1.000000 | 4.14201e-11 | 1.000000 |
| rad38                         | 1.76721e-11 | 1.000000 | 1.76721e-11 | 1.000000 |
| rad39                         | 9.95679e-12 | 1.000000 | 9.95679e-12 | 1.000000 |
| rad60syn                      | 9.60733e-12 | 1.000000 | 9.60733e-12 | 1.000000 |
| rad13                         | 8.97073e-12 | 1.000000 | 8.97073e-12 | 1.000000 |
| rad60anti                     | 4.70064e-12 | 1.000000 | 4.70064e-12 | 1.000000 |
| PAH3+H                        | 4.00250e-12 | 1.000000 | 4.00250e-12 | 1.000000 |
| PhcycC3H3_A+H                 | 2.28762e-12 | 1.000000 | 2.28762e-12 | 1.000000 |
| rad14                         | 2.12042e-12 | 1.000000 | 2.12042e-12 | 1.000000 |
| rad27                         | 1.85726e-12 | 1.000000 | 1.85726e-12 | 1.000000 |
| rad5                          | 1.52621e-12 | 1.000000 | 1.52621e-12 | 1.000000 |
| PAH10+CH3                     | 1.02470e-12 | 1.000000 | 1.02470e-12 | 1.000000 |
| rad46                         | 1.01941e-12 | 1.000000 | 1.01941e-12 | 1.000000 |
| rad59                         | 8.22552e-13 | 1.000000 | 8.22552e-13 | 1.000000 |
| rad43                         | 8.77496e-14 | 1.000000 | 8.77496e-14 | 1.000000 |
| Benzene+cycloprop-1-enylidene | 6.98038e-14 | 1.000000 | 6.98038e-14 | 1.000000 |
| rad62                         | 1.52916e-14 | 1.000000 | 1.52916e-14 | 1.000000 |
| rad18                         | 1.43344e-14 | 1.000000 | 1.43344e-14 | 1.000000 |

|                |             |         |             |         |
|----------------|-------------|---------|-------------|---------|
| rad33          | 1.03155e-14 | 1.00000 | 1.03155e-14 | 1.00000 |
| rad25          | 1.01482e-14 | 1.00000 | 1.01482e-14 | 1.00000 |
| Phenyl+cycC3H4 | 7.86467e-15 | 1.00000 | 0.00000     | 1.00000 |
| rad50          | 6.63956e-15 | 1.00000 | 6.63956e-15 | 1.00000 |
| rad20          | 1.62536e-15 | 1.00000 | 1.62536e-15 | 1.00000 |
| rad54          | 1.60260e-15 | 1.00000 | 1.60260e-15 | 1.00000 |
| rad21          | 1.01071e-15 | 1.00000 | 1.01071e-15 | 1.00000 |
| rad70          | 3.67178e-16 | 1.00000 | 3.67178e-16 | 1.00000 |
| PhcycC3H3_B+H  | 3.53272e-16 | 1.00000 | 3.53272e-16 | 1.00000 |
| PAH1+H         | 6.65850e-17 | 1.00000 | 6.65850e-17 | 1.00000 |
| rad58          | 6.42082e-17 | 1.00000 | 6.42082e-17 | 1.00000 |
| rad52          | 4.39582e-17 | 1.00000 | 4.39582e-17 | 1.00000 |
| rad31          | 2.65731e-17 | 1.00000 | 2.65731e-17 | 1.00000 |
| rad24          | 1.78276e-17 | 1.00000 | 1.78276e-17 | 1.00000 |
| rad55          | 1.18535e-17 | 1.00000 | 1.18535e-17 | 1.00000 |
| rad51          | 1.17152e-17 | 1.00000 | 1.17152e-17 | 1.00000 |
| rad34          | 4.81242e-18 | 1.00000 | 4.81242e-18 | 1.00000 |
| rad41          | 2.51082e-18 | 1.00000 | 2.51082e-18 | 1.00000 |
| rad42          | 1.66755e-18 | 1.00000 | 1.66755e-18 | 1.00000 |
| rad65          | 2.37821e-19 | 1.00000 | 2.37821e-19 | 1.00000 |
| rad53          | 2.93717e-23 | 1.00000 | 2.93717e-23 | 1.00000 |
| rad47          | 2.19923e-24 | 1.00000 | 2.19923e-24 | 1.00000 |
| rad64          | 7.75708e-25 | 1.00000 | 7.75708e-25 | 1.00000 |
| rad61          | 2.94186e-25 | 1.00000 | 2.94186e-25 | 1.00000 |
| rad56          | 3.22935e-28 | 1.00000 | 3.22935e-28 | 1.00000 |
| rad68syn       | 8.99389e-29 | 1.00000 | 8.99389e-29 | 1.00000 |
| rad68anti      | 7.26095e-29 | 1.00000 | 7.26095e-29 | 1.00000 |
| rad40syn       | 1.33847e-32 | 1.00000 | 1.33847e-32 | 1.00000 |
| rad40anti      | 1.06833e-32 | 1.00000 | 1.06833e-32 | 1.00000 |
| rad73          | 6.02851e-34 | 1.00000 | 6.02851e-34 | 1.00000 |
| PAH8+H         | 3.62073e-35 | 1.00000 | 3.62073e-35 | 1.00000 |
| rad19syn       | 9.31861e-36 | 1.00000 | 9.31861e-36 | 1.00000 |
| rad71          | 7.51585e-39 | 1.00000 | 7.51585e-39 | 1.00000 |
| rad8           | 2.97594e-51 | 1.00000 | 2.97594e-51 | 1.00000 |

100.000000 Pa, 130.000000 K

=====

| Rate constant             | True (fraction)        | Effective (fraction)   |
|---------------------------|------------------------|------------------------|
| Total                     | 3.81236e-15 (1.00 )    | 3.81236e-15 (1.00 )    |
| Formation of rad19        | 3.81236e-15 (1.000 )   | 3.81236e-15 (1.000 )   |
| H-abstraction to cyc2enyl | 1.44825e-21 (3.80e-07) | 1.44825e-21 (3.80e-07) |
| H-abstraction to cyc1enyl | 2.94348e-27 (7.72e-13) | 2.94348e-27 (7.72e-13) |

| species                       | PYtrue      | Cumul    | PYeffective | Cumul    |
|-------------------------------|-------------|----------|-------------|----------|
| Indene+H                      | 0.818961    | 0.818961 | 0.818961    | 0.818961 |
| rad9                          | 0.180685    | 0.999646 | 0.180685    | 0.999646 |
| rad15                         | 0.000197637 | 0.999843 | 0.000197637 | 0.999843 |
| PhCHCCH2+H                    | 0.000143151 | 0.999986 | 0.000143151 | 0.999986 |
| rad6                          | 7.33947e-06 | 0.999994 | 7.33947e-06 | 0.999994 |
| PhCCH+CH3                     | 1.39408e-06 | 0.999995 | 1.39408e-06 | 0.999995 |
| rad2                          | 1.10506e-06 | 0.999996 | 1.10506e-06 | 0.999996 |
| PhCCCH3+H                     | 9.24013e-07 | 0.999997 | 9.24013e-07 | 0.999997 |
| C2H2+PhCH2                    | 6.92627e-07 | 0.999998 | 6.92627e-07 | 0.999998 |
| Ph+MeAc                       | 6.42014e-07 | 0.999999 | 6.42014e-07 | 0.999999 |
| rad26                         | 5.32507e-07 | 0.999999 | 5.32507e-07 | 0.999999 |
| Benzene+cycloprop-2-enylidene | 3.79882e-07 | 0.999999 | 3.79882e-07 | 0.999999 |
| rad67                         | 3.11843e-07 | 1.000000 | 3.11843e-07 | 1.000000 |
| rad35                         | 1.37923e-07 | 1.000000 | 1.37923e-07 | 1.000000 |
| rad10                         | 1.10832e-07 | 1.000000 | 1.10832e-07 | 1.000000 |
| rad1                          | 7.17997e-08 | 1.000000 | 7.17997e-08 | 1.000000 |
| rad23                         | 2.28762e-08 | 1.000000 | 2.28762e-08 | 1.000000 |
| rad3                          | 1.27264e-08 | 1.000000 | 1.27264e-08 | 1.000000 |
| Ph+Allene                     | 9.21291e-09 | 1.000000 | 9.21291e-09 | 1.000000 |
| rad4                          | 6.47108e-09 | 1.000000 | 6.47108e-09 | 1.000000 |
| rad28                         | 3.59911e-09 | 1.000000 | 3.59911e-09 | 1.000000 |
| rad7                          | 2.81508e-09 | 1.000000 | 2.81508e-09 | 1.000000 |
| rad30                         | 2.41307e-09 | 1.000000 | 2.41307e-09 | 1.000000 |
| rad45                         | 1.72974e-09 | 1.000000 | 1.72974e-09 | 1.000000 |
| PhCH2CCH+H                    | 1.63126e-09 | 1.000000 | 1.63126e-09 | 1.000000 |
| rad11                         | 1.19688e-09 | 1.000000 | 1.19688e-09 | 1.000000 |
| rad37                         | 1.13266e-09 | 1.000000 | 1.13266e-09 | 1.000000 |
| rad12                         | 9.73599e-10 | 1.000000 | 9.73599e-10 | 1.000000 |
| rad19anti                     | 3.11950e-10 | 1.000000 | 3.11950e-10 | 1.000000 |
| rad36                         | 1.06066e-10 | 1.000000 | 1.06066e-10 | 1.000000 |
| rad22                         | 5.90419e-11 | 1.000000 | 5.90419e-11 | 1.000000 |
| PAH7+H                        | 5.66187e-11 | 1.000000 | 5.66187e-11 | 1.000000 |
| PAH9+H                        | 4.77560e-11 | 1.000000 | 4.77560e-11 | 1.000000 |
| rad38                         | 2.06258e-11 | 1.000000 | 2.06258e-11 | 1.000000 |

|                               |             |         |             |         |
|-------------------------------|-------------|---------|-------------|---------|
| rad39                         | 1.39394e-11 | 1.00000 | 1.39394e-11 | 1.00000 |
| rad60syn                      | 1.07769e-11 | 1.00000 | 1.07769e-11 | 1.00000 |
| rad13                         | 9.53978e-12 | 1.00000 | 9.53978e-12 | 1.00000 |
| rad60anti                     | 5.28232e-12 | 1.00000 | 5.28232e-12 | 1.00000 |
| PAH3+H                        | 4.60192e-12 | 1.00000 | 4.60192e-12 | 1.00000 |
| PhcycC3H3_A+H                 | 2.87248e-12 | 1.00000 | 2.87248e-12 | 1.00000 |
| rad14                         | 1.98595e-12 | 1.00000 | 1.98595e-12 | 1.00000 |
| rad27                         | 1.74172e-12 | 1.00000 | 1.74172e-12 | 1.00000 |
| PAH10+CH3                     | 1.35667e-12 | 1.00000 | 1.35667e-12 | 1.00000 |
| rad5                          | 1.24836e-12 | 1.00000 | 1.24836e-12 | 1.00000 |
| rad46                         | 1.18757e-12 | 1.00000 | 1.18757e-12 | 1.00000 |
| rad59                         | 9.42270e-13 | 1.00000 | 9.42270e-13 | 1.00000 |
| Benzene+cycloprop-1-enylidene | 7.72089e-13 | 1.00000 | 7.72089e-13 | 1.00000 |
| rad43                         | 1.09805e-13 | 1.00000 | 1.09805e-13 | 1.00000 |
| rad62                         | 1.92294e-14 | 1.00000 | 1.92294e-14 | 1.00000 |
| rad18                         | 1.35270e-14 | 1.00000 | 1.35270e-14 | 1.00000 |
| Phenyl+cycC3H4                | 1.18041e-14 | 1.00000 | 0.00000     | 1.00000 |
| rad33                         | 1.09864e-14 | 1.00000 | 1.09864e-14 | 1.00000 |
| rad25                         | 1.06270e-14 | 1.00000 | 1.06270e-14 | 1.00000 |
| rad50                         | 8.06669e-15 | 1.00000 | 8.06669e-15 | 1.00000 |
| rad54                         | 2.20137e-15 | 1.00000 | 2.20137e-15 | 1.00000 |
| rad20                         | 1.52422e-15 | 1.00000 | 1.52422e-15 | 1.00000 |
| rad21                         | 9.46952e-16 | 1.00000 | 9.46952e-16 | 1.00000 |
| PhcycC3H3_B+H                 | 8.62831e-16 | 1.00000 | 8.62831e-16 | 1.00000 |
| rad70                         | 4.64291e-16 | 1.00000 | 4.64291e-16 | 1.00000 |
| PAH1+H                        | 9.90448e-17 | 1.00000 | 9.90448e-17 | 1.00000 |
| rad58                         | 8.08238e-17 | 1.00000 | 8.08238e-17 | 1.00000 |
| rad52                         | 5.50417e-17 | 1.00000 | 5.50417e-17 | 1.00000 |
| rad31                         | 2.61587e-17 | 1.00000 | 2.61587e-17 | 1.00000 |
| rad55                         | 1.70710e-17 | 1.00000 | 1.70710e-17 | 1.00000 |
| rad51                         | 1.51971e-17 | 1.00000 | 1.51971e-17 | 1.00000 |
| rad24                         | 1.51018e-17 | 1.00000 | 1.51018e-17 | 1.00000 |
| rad34                         | 6.47835e-18 | 1.00000 | 6.47835e-18 | 1.00000 |
| rad41                         | 3.79816e-18 | 1.00000 | 3.79816e-18 | 1.00000 |
| rad42                         | 2.45509e-18 | 1.00000 | 2.45509e-18 | 1.00000 |
| rad65                         | 3.15074e-19 | 1.00000 | 3.15074e-19 | 1.00000 |
| rad53                         | 7.88963e-23 | 1.00000 | 7.88963e-23 | 1.00000 |
| rad64                         | 2.81392e-24 | 1.00000 | 2.81392e-24 | 1.00000 |
| rad47                         | 2.26205e-24 | 1.00000 | 2.26205e-24 | 1.00000 |
| rad61                         | 1.77558e-24 | 1.00000 | 1.77558e-24 | 1.00000 |
| rad56                         | 2.63318e-27 | 1.00000 | 2.63318e-27 | 1.00000 |
| rad68syn                      | 8.43272e-28 | 1.00000 | 8.43272e-28 | 1.00000 |
| rad68anti                     | 6.77200e-28 | 1.00000 | 6.77200e-28 | 1.00000 |
| rad40syn                      | 3.09362e-31 | 1.00000 | 3.09362e-31 | 1.00000 |
| rad40anti                     | 2.48622e-31 | 1.00000 | 2.48622e-31 | 1.00000 |
| rad73                         | 1.09531e-32 | 1.00000 | 1.09531e-32 | 1.00000 |
| PAH8+H                        | 1.58718e-33 | 1.00000 | 1.58718e-33 | 1.00000 |
| rad19syn                      | 2.10478e-35 | 1.00000 | 2.10478e-35 | 1.00000 |
| rad71                         | 4.42025e-37 | 1.00000 | 4.42025e-37 | 1.00000 |
| rad8                          | 3.51977e-51 | 1.00000 | 3.51977e-51 | 1.00000 |

100.000000 Pa, 140.000000 K

=====

| Rate constant             | True (fraction)        | Effective (fraction)   |
|---------------------------|------------------------|------------------------|
| Total                     | 4.99515e-15 (1.00 )    | 4.99515e-15 (1.00 )    |
| Formation of rad19        | 4.99514e-15 (1.000 )   | 4.99514e-15 (1.000 )   |
| H-abstraction to cyc2enyl | 5.62488e-21 (1.13e-06) | 5.62488e-21 (1.13e-06) |
| H-abstraction to cyclenyl | 3.00047e-26 (6.01e-12) | 3.00047e-26 (6.01e-12) |

| species                       | PYtrue      | Cumul    | PYeffective | Cumul    |
|-------------------------------|-------------|----------|-------------|----------|
| Indene+H                      | 0.842048    | 0.842048 | 0.842048    | 0.842048 |
| rad9                          | 0.157611    | 0.999659 | 0.157611    | 0.999659 |
| rad15                         | 0.000170677 | 0.999830 | 0.000170677 | 0.999830 |
| PhCHCCH2+H                    | 0.000154617 | 0.999984 | 0.000154617 | 0.999984 |
| rad6                          | 7.93481e-06 | 0.999992 | 7.93481e-06 | 0.999992 |
| PhCCH+CH3                     | 1.57129e-06 | 0.999994 | 1.57129e-06 | 0.999994 |
| Benzene+cycloprop-2-enylidene | 1.12607e-06 | 0.999995 | 1.12607e-06 | 0.999995 |
| rad2                          | 1.04984e-06 | 0.999996 | 1.04984e-06 | 0.999996 |
| PhCCH3+H                      | 1.04723e-06 | 0.999997 | 1.04723e-06 | 0.999997 |
| C2H2+PhCH2                    | 7.60889e-07 | 0.999998 | 7.60889e-07 | 0.999998 |
| Ph+MeAc                       | 7.37473e-07 | 0.999998 | 7.37473e-07 | 0.999998 |
| rad26                         | 5.39270e-07 | 0.999999 | 5.39270e-07 | 0.999999 |
| rad67                         | 3.42022e-07 | 0.999999 | 3.42022e-07 | 0.999999 |
| rad35                         | 1.50926e-07 | 0.999999 | 1.50926e-07 | 0.999999 |
| rad10                         | 1.04769e-07 | 1.000000 | 1.04769e-07 | 1.000000 |
| rad1                          | 6.85258e-08 | 1.000000 | 6.85258e-08 | 1.000000 |
| rad23                         | 1.98892e-08 | 1.000000 | 1.98892e-08 | 1.000000 |
| rad3                          | 1.20220e-08 | 1.000000 | 1.20220e-08 | 1.000000 |

|                               |             |          |             |          |
|-------------------------------|-------------|----------|-------------|----------|
| Ph+Allene                     | 1.05972e-08 | 1.000000 | 1.05972e-08 | 1.000000 |
| rad4                          | 6.12009e-09 | 1.000000 | 6.12009e-09 | 1.000000 |
| rad28                         | 4.25548e-09 | 1.000000 | 4.25548e-09 | 1.000000 |
| rad7                          | 2.99718e-09 | 1.000000 | 2.99718e-09 | 1.000000 |
| rad30                         | 2.64314e-09 | 1.000000 | 2.64314e-09 | 1.000000 |
| PhCH2CCH+H                    | 1.89112e-09 | 1.000000 | 1.89112e-09 | 1.000000 |
| rad45                         | 1.47726e-09 | 1.000000 | 1.47726e-09 | 1.000000 |
| rad37                         | 1.37194e-09 | 1.000000 | 1.37194e-09 | 1.000000 |
| rad11                         | 1.26600e-09 | 1.000000 | 1.26600e-09 | 1.000000 |
| rad12                         | 8.51465e-10 | 1.000000 | 8.51465e-10 | 1.000000 |
| rad19anti                     | 2.67918e-10 | 1.000000 | 2.67918e-10 | 1.000000 |
| rad36                         | 9.06688e-11 | 1.000000 | 9.06688e-11 | 1.000000 |
| PAH7+H                        | 7.69154e-11 | 1.000000 | 7.69154e-11 | 1.000000 |
| PAH9+H                        | 5.46090e-11 | 1.000000 | 5.46090e-11 | 1.000000 |
| rad22                         | 5.38336e-11 | 1.000000 | 5.38336e-11 | 1.000000 |
| rad38                         | 2.39752e-11 | 1.000000 | 2.39752e-11 | 1.000000 |
| rad39                         | 1.93117e-11 | 1.000000 | 1.93117e-11 | 1.000000 |
| rad60syn                      | 1.20588e-11 | 1.000000 | 1.20588e-11 | 1.000000 |
| rad13                         | 1.01165e-11 | 1.000000 | 1.01165e-11 | 1.000000 |
| Benzene+cycloprop-1-enylidene | 6.00677e-12 | 1.000000 | 6.00677e-12 | 1.000000 |
| rad60anti                     | 5.92169e-12 | 1.000000 | 5.92169e-12 | 1.000000 |
| PAH3+H                        | 5.28486e-12 | 1.000000 | 5.28486e-12 | 1.000000 |
| PhcycC3H3_A+H                 | 3.63408e-12 | 1.000000 | 3.63408e-12 | 1.000000 |
| rad14                         | 1.85252e-12 | 1.000000 | 1.85252e-12 | 1.000000 |
| PAH10+CH3                     | 1.78768e-12 | 1.000000 | 1.78768e-12 | 1.000000 |
| rad27                         | 1.62667e-12 | 1.000000 | 1.62667e-12 | 1.000000 |
| rad46                         | 1.37695e-12 | 1.000000 | 1.37695e-12 | 1.000000 |
| rad59                         | 1.07788e-12 | 1.000000 | 1.07788e-12 | 1.000000 |
| rad5                          | 1.02844e-12 | 1.000000 | 1.02844e-12 | 1.000000 |
| rad43                         | 1.36611e-13 | 1.000000 | 1.36611e-13 | 1.000000 |
| rad62                         | 2.40277e-14 | 1.000000 | 2.40277e-14 | 1.000000 |
| Phenyl+cycC3H4                | 1.75978e-14 | 1.000000 | 0.000000    | 1.000000 |
| rad18                         | 1.28792e-14 | 1.000000 | 1.28792e-14 | 1.000000 |
| rad33                         | 1.16710e-14 | 1.000000 | 1.16710e-14 | 1.000000 |
| rad25                         | 1.11202e-14 | 1.000000 | 1.11202e-14 | 1.000000 |
| rad50                         | 9.77139e-15 | 1.000000 | 9.77139e-15 | 1.000000 |
| rad54                         | 3.02179e-15 | 1.000000 | 3.02179e-15 | 1.000000 |
| PhcycC3H3_B+H                 | 1.93323e-15 | 1.000000 | 1.93323e-15 | 1.000000 |
| rad20                         | 1.44299e-15 | 1.000000 | 1.44299e-15 | 1.000000 |
| rad21                         | 8.95817e-16 | 1.000000 | 8.95817e-16 | 1.000000 |
| rad70                         | 5.89677e-16 | 1.000000 | 5.89677e-16 | 1.000000 |
| PAH1+H                        | 1.47299e-16 | 1.000000 | 1.47299e-16 | 1.000000 |
| rad58                         | 1.02101e-16 | 1.000000 | 1.02101e-16 | 1.000000 |
| rad52                         | 6.88211e-17 | 1.000000 | 6.88211e-17 | 1.000000 |
| rad31                         | 2.56693e-17 | 1.000000 | 2.56693e-17 | 1.000000 |
| rad55                         | 2.46386e-17 | 1.000000 | 2.46386e-17 | 1.000000 |
| rad51                         | 1.97238e-17 | 1.000000 | 1.97238e-17 | 1.000000 |
| rad24                         | 1.28857e-17 | 1.000000 | 1.28857e-17 | 1.000000 |
| rad34                         | 8.78168e-18 | 1.000000 | 8.78168e-18 | 1.000000 |
| rad41                         | 5.72483e-18 | 1.000000 | 5.72483e-18 | 1.000000 |
| rad42                         | 3.59844e-18 | 1.000000 | 3.59844e-18 | 1.000000 |
| rad65                         | 4.17655e-19 | 1.000000 | 4.17655e-19 | 1.000000 |
| rad53                         | 2.01957e-22 | 1.000000 | 2.01957e-22 | 1.000000 |
| rad64                         | 9.52711e-24 | 1.000000 | 9.52711e-24 | 1.000000 |
| rad61                         | 9.00629e-24 | 1.000000 | 9.00629e-24 | 1.000000 |
| rad47                         | 2.32966e-24 | 1.000000 | 2.32966e-24 | 1.000000 |
| rad56                         | 1.76468e-26 | 1.000000 | 1.76468e-26 | 1.000000 |
| rad68syn                      | 6.13925e-27 | 1.000000 | 6.13925e-27 | 1.000000 |
| rad68anti                     | 4.90451e-27 | 1.000000 | 4.90451e-27 | 1.000000 |
| rad40syn                      | 4.91696e-30 | 1.000000 | 4.91696e-30 | 1.000000 |
| rad40anti                     | 3.98710e-30 | 1.000000 | 3.98710e-30 | 1.000000 |
| rad73                         | 1.45152e-31 | 1.000000 | 1.45152e-31 | 1.000000 |
| PAH8+H                        | 4.31028e-32 | 1.000000 | 4.31028e-32 | 1.000000 |
| rad19syn                      | 4.98356e-35 | 1.000000 | 4.98356e-35 | 1.000000 |
| rad71                         | 1.50540e-35 | 1.000000 | 1.50540e-35 | 1.000000 |
| rad8                          | 4.26969e-51 | 1.000000 | 4.26969e-51 | 1.000000 |

100.000000 Pa, 150.000000 K

| Rate constant             | True (fraction)        | Effective (fraction)   |
|---------------------------|------------------------|------------------------|
| Total                     | 6.34137e-15 (1.00 )    | 6.34137e-15 (1.00 )    |
| Formation of rad19        | 6.34135e-15 (1.000 )   | 6.34135e-15 (1.000 )   |
| H-abstraction to cyc2enyl | 1.81685e-20 (2.87e-06) | 1.81685e-20 (2.87e-06) |
| H-abstraction to cyclenyl | 2.23765e-25 (3.53e-11) | 2.23765e-25 (3.53e-11) |

  

| species  | PYtrue   | Cumul    | PYeffective | Cumul    |
|----------|----------|----------|-------------|----------|
| Indene+H | 0.862323 | 0.862323 | 0.862323    | 0.862323 |
| rad9     | 0.137345 | 0.999667 | 0.137345    | 0.999667 |

|                               |             |          |             |          |
|-------------------------------|-------------|----------|-------------|----------|
| PhCHCCH2+H                    | 0.000166499 | 0.999834 | 0.000166499 | 0.999834 |
| rad15                         | 0.000147374 | 0.999981 | 0.000147374 | 0.999981 |
| rad6                          | 8.54452e-06 | 0.999990 | 8.54452e-06 | 0.999990 |
| Benzene+cycloprop-2-enylidene | 2.86508e-06 | 0.999992 | 2.86508e-06 | 0.999992 |
| PhCCH+CH3                     | 1.75737e-06 | 0.999994 | 1.75737e-06 | 0.999994 |
| PhCCCH3+H                     | 1.17828e-06 | 0.999995 | 1.17828e-06 | 0.999995 |
| rad2                          | 9.92020e-07 | 0.999996 | 9.92020e-07 | 0.999996 |
| Ph+MeAc                       | 8.41313e-07 | 0.999997 | 8.41313e-07 | 0.999997 |
| C2H2+PhCH2                    | 8.34149e-07 | 0.999998 | 8.34149e-07 | 0.999998 |
| rad26                         | 5.41687e-07 | 0.999999 | 5.41687e-07 | 0.999999 |
| rad67                         | 3.74196e-07 | 0.999999 | 3.74196e-07 | 0.999999 |
| rad35                         | 1.64735e-07 | 0.999999 | 1.64735e-07 | 0.999999 |
| rad10                         | 9.85549e-08 | 0.999999 | 9.85549e-08 | 0.999999 |
| rad1                          | 6.50760e-08 | 0.999999 | 6.50760e-08 | 0.999999 |
| rad23                         | 1.73807e-08 | 0.999999 | 1.73807e-08 | 0.999999 |
| Ph+Allene                     | 1.21954e-08 | 0.999999 | 1.21954e-08 | 0.999999 |
| rad3                          | 1.13017e-08 | 0.999999 | 1.13017e-08 | 0.999999 |
| rad4                          | 5.76090e-09 | 0.999999 | 5.76090e-09 | 0.999999 |
| rad28                         | 4.98985e-09 | 0.999999 | 4.98985e-09 | 0.999999 |
| rad7                          | 3.18263e-09 | 0.999999 | 3.18263e-09 | 0.999999 |
| rad30                         | 2.88824e-09 | 0.999999 | 2.88824e-09 | 0.999999 |
| PhCH2CCH+H                    | 2.19413e-09 | 0.999999 | 2.19413e-09 | 0.999999 |
| rad37                         | 1.64952e-09 | 0.999999 | 1.64952e-09 | 0.999999 |
| rad11                         | 1.33662e-09 | 0.999999 | 1.33662e-09 | 0.999999 |
| rad45                         | 1.27016e-09 | 0.999999 | 1.27016e-09 | 0.999999 |
| rad12                         | 7.44700e-10 | 0.999999 | 7.44700e-10 | 0.999999 |
| rad19anti                     | 2.30598e-10 | 0.999999 | 2.30598e-10 | 0.999999 |
| PAH7+H                        | 1.04066e-10 | 0.999999 | 1.04066e-10 | 0.999999 |
| rad36                         | 7.80497e-11 | 0.999999 | 7.80497e-11 | 0.999999 |
| PAH9+H                        | 6.22215e-11 | 0.999999 | 6.22215e-11 | 0.999999 |
| rad22                         | 4.96435e-11 | 0.999999 | 4.96435e-11 | 0.999999 |
| Benzene+cycloprop-1-enylidene | 3.52865e-11 | 0.999999 | 3.52865e-11 | 0.999999 |
| rad38                         | 2.78061e-11 | 0.999999 | 2.78061e-11 | 0.999999 |
| rad39                         | 2.65585e-11 | 0.999999 | 2.65585e-11 | 0.999999 |
| rad60syn                      | 1.34745e-11 | 0.999999 | 1.34745e-11 | 0.999999 |
| rad13                         | 1.07053e-11 | 0.999999 | 1.07053e-11 | 0.999999 |
| rad60anti                     | 6.62996e-12 | 0.999999 | 6.62996e-12 | 0.999999 |
| PAH3+H                        | 6.06946e-12 | 0.999999 | 6.06946e-12 | 0.999999 |
| PhcycC3H3_A+H                 | 4.63279e-12 | 0.999999 | 4.63279e-12 | 0.999999 |
| PAH10+CH3                     | 2.34908e-12 | 0.999999 | 2.34908e-12 | 0.999999 |
| rad14                         | 1.72182e-12 | 0.999999 | 1.72182e-12 | 0.999999 |
| rad46                         | 1.59197e-12 | 0.999999 | 1.59197e-12 | 0.999999 |
| rad27                         | 1.51359e-12 | 0.999999 | 1.51359e-12 | 0.999999 |
| rad59                         | 1.23276e-12 | 0.999999 | 1.23276e-12 | 0.999999 |
| rad5                          | 8.52258e-13 | 0.999999 | 8.52258e-13 | 0.999999 |
| rad43                         | 1.69312e-13 | 0.999999 | 1.69312e-13 | 0.999999 |
| rad62                         | 2.98920e-14 | 0.999999 | 2.98920e-14 | 0.999999 |
| Phenyl+cycC3H4                | 2.61242e-14 | 0.999999 | 0.00000     | 0.999999 |
| rad33                         | 1.23748e-14 | 0.999999 | 1.23748e-14 | 0.999999 |
| rad18                         | 1.23540e-14 | 0.999999 | 1.23540e-14 | 0.999999 |
| rad50                         | 1.18260e-14 | 0.999999 | 1.18260e-14 | 0.999999 |
| rad25                         | 1.16303e-14 | 0.999999 | 1.16303e-14 | 0.999999 |
| rad54                         | 4.15626e-15 | 0.999999 | 4.15626e-15 | 0.999999 |
| PhcycC3H3_B+H                 | 4.05133e-15 | 0.999999 | 4.05133e-15 | 0.999999 |
| rad20                         | 1.37769e-15 | 0.999999 | 1.37769e-15 | 0.999999 |
| rad21                         | 8.54762e-16 | 0.999999 | 8.54762e-16 | 0.999999 |
| rad70                         | 7.53464e-16 | 0.999999 | 7.53464e-16 | 0.999999 |
| PAH1+H                        | 2.19324e-16 | 0.999999 | 2.19324e-16 | 0.999999 |
| rad58                         | 1.29612e-16 | 0.999999 | 1.29612e-16 | 0.999999 |
| rad52                         | 8.61188e-17 | 0.999999 | 8.61188e-17 | 0.999999 |
| rad55                         | 3.57305e-17 | 0.999999 | 3.57305e-17 | 0.999999 |
| rad51                         | 2.56708e-17 | 0.999999 | 2.56708e-17 | 0.999999 |
| rad31                         | 2.51331e-17 | 0.999999 | 2.51331e-17 | 0.999999 |
| rad34                         | 1.20045e-17 | 0.999999 | 1.20045e-17 | 0.999999 |
| rad24                         | 1.10818e-17 | 0.999999 | 1.10818e-17 | 0.999999 |
| rad41                         | 8.60824e-18 | 0.999999 | 8.60824e-18 | 0.999999 |
| rad42                         | 5.25789e-18 | 0.999999 | 5.25789e-18 | 0.999999 |
| rad65                         | 5.55260e-19 | 0.999999 | 5.55260e-19 | 0.999999 |
| rad53                         | 4.96690e-22 | 0.999999 | 4.96690e-22 | 0.999999 |
| rad61                         | 3.91734e-23 | 0.999999 | 3.91734e-23 | 0.999999 |
| rad64                         | 3.02779e-23 | 0.999999 | 3.02779e-23 | 0.999999 |
| rad47                         | 2.40532e-24 | 0.999999 | 2.40532e-24 | 0.999999 |
| rad56                         | 9.92098e-26 | 0.999999 | 9.92098e-26 | 0.999999 |
| rad68syn                      | 3.60092e-26 | 0.999999 | 3.60092e-26 | 0.999999 |
| rad68anti                     | 2.86106e-26 | 0.999999 | 2.86106e-26 | 0.999999 |
| rad40syn                      | 5.64585e-29 | 0.999999 | 5.64585e-29 | 0.999999 |
| rad40anti                     | 4.62330e-29 | 0.999999 | 4.62330e-29 | 0.999999 |
| rad73                         | 1.45749e-30 | 0.999999 | 1.45749e-30 | 0.999999 |
| PAH8+H                        | 7.86451e-31 | 0.999999 | 7.86451e-31 | 0.999999 |
| rad71                         | 3.34739e-34 | 0.999999 | 3.34739e-34 | 0.999999 |



|          |             |          |             |          |
|----------|-------------|----------|-------------|----------|
| rad19syn | 1.23876e-34 | 0.999999 | 1.23876e-34 | 0.999999 |
| rad8     | 5.29871e-51 | 0.999999 | 5.29871e-51 | 0.999999 |

100.000000 Pa, 160.000000 K

=====

| Rate constant             | True (fraction)        | Effective (fraction)   |
|---------------------------|------------------------|------------------------|
| Total                     | 7.84423e-15 (1.00 )    | 7.84423e-15 (1.00 )    |
| Formation of rad19        | 7.84418e-15 (1.000 )   | 7.84418e-15 (1.000 )   |
| H-abstraction to cyc2enyl | 5.05321e-20 (6.44e-06) | 5.05321e-20 (6.44e-06) |
| H-abstraction to cyclenyl | 1.29479e-24 (1.65e-10) | 1.29479e-24 (1.65e-10) |

| species                       | PYtrue      | Cumul    | PYeffective | Cumul    |
|-------------------------------|-------------|----------|-------------|----------|
| Indene+H                      | 0.880135    | 0.880135 | 0.880135    | 0.880135 |
| rad9                          | 0.119535    | 0.999671 | 0.119535    | 0.999671 |
| PhCHCCH2+H                    | 0.000178893 | 0.999849 | 0.000178893 | 0.999849 |
| rad15                         | 0.000127187 | 0.999977 | 0.000127187 | 0.999977 |
| rad6                          | 9.17208e-06 | 0.999986 | 9.17208e-06 | 0.999986 |
| Benzene+cycloprop-2-enylidene | 6.44194e-06 | 0.999992 | 6.44194e-06 | 0.999992 |
| PhCCH+CH3                     | 1.95320e-06 | 0.999994 | 1.95320e-06 | 0.999994 |
| PhCCCH3+H                     | 1.31802e-06 | 0.999996 | 1.31802e-06 | 0.999996 |
| Ph+MeAc                       | 9.54588e-07 | 0.999996 | 9.54588e-07 | 0.999996 |
| rad2                          | 9.32830e-07 | 0.999997 | 9.32830e-07 | 0.999997 |
| C2H2+PhCH2                    | 9.13386e-07 | 0.999998 | 9.13386e-07 | 0.999998 |
| rad26                         | 5.39944e-07 | 0.999999 | 5.39944e-07 | 0.999999 |
| rad67                         | 4.08725e-07 | 0.999999 | 4.08725e-07 | 0.999999 |
| rad35                         | 1.79496e-07 | 0.999999 | 1.79496e-07 | 0.999999 |
| rad10                         | 9.23000e-08 | 1.000000 | 9.23000e-08 | 1.000000 |
| rad1                          | 6.15275e-08 | 1.000000 | 6.15275e-08 | 1.000000 |
| rad23                         | 1.52828e-08 | 1.000000 | 1.52828e-08 | 1.000000 |
| Ph+Allene                     | 1.40581e-08 | 1.000000 | 1.40581e-08 | 1.000000 |
| rad3                          | 1.05783e-08 | 1.000000 | 1.05783e-08 | 1.000000 |
| rad28                         | 5.81014e-09 | 1.000000 | 5.81014e-09 | 1.000000 |
| rad4                          | 5.39993e-09 | 1.000000 | 5.39993e-09 | 1.000000 |
| rad7                          | 3.37271e-09 | 1.000000 | 3.37271e-09 | 1.000000 |
| rad30                         | 3.15120e-09 | 1.000000 | 3.15120e-09 | 1.000000 |
| PhCH2CCH+H                    | 2.55073e-09 | 1.000000 | 2.55073e-09 | 1.000000 |
| rad37                         | 1.97155e-09 | 1.000000 | 1.97155e-09 | 1.000000 |
| rad11                         | 1.40918e-09 | 1.000000 | 1.40918e-09 | 1.000000 |
| rad45                         | 1.10041e-09 | 1.000000 | 1.10041e-09 | 1.000000 |
| rad12                         | 6.51147e-10 | 1.000000 | 6.51147e-10 | 1.000000 |
| rad19anti                     | 1.98812e-10 | 1.000000 | 1.98812e-10 | 1.000000 |
| Benzene+cycloprop-1-enylidene | 1.65062e-10 | 1.000000 | 1.65062e-10 | 1.000000 |
| PAH7+H                        | 1.40462e-10 | 1.000000 | 1.40462e-10 | 1.000000 |
| PAH9+H                        | 7.07462e-11 | 1.000000 | 7.07462e-11 | 1.000000 |
| rad36                         | 6.77173e-11 | 1.000000 | 6.77173e-11 | 1.000000 |
| rad22                         | 4.62935e-11 | 1.000000 | 4.62935e-11 | 1.000000 |
| rad39                         | 3.63432e-11 | 1.000000 | 3.63432e-11 | 1.000000 |
| rad38                         | 3.22246e-11 | 1.000000 | 3.22246e-11 | 1.000000 |
| rad60syn                      | 1.50496e-11 | 1.000000 | 1.50496e-11 | 1.000000 |
| rad13                         | 1.13102e-11 | 1.000000 | 1.13102e-11 | 1.000000 |
| rad60anti                     | 7.42030e-12 | 1.000000 | 7.42030e-12 | 1.000000 |
| PAH3+H                        | 6.97790e-12 | 1.000000 | 6.97790e-12 | 1.000000 |
| PhcycC3H3_A+H                 | 5.95066e-12 | 1.000000 | 5.95066e-12 | 1.000000 |
| PAH10+CH3                     | 3.08256e-12 | 1.000000 | 3.08256e-12 | 1.000000 |
| rad46                         | 1.83812e-12 | 1.000000 | 1.83812e-12 | 1.000000 |
| rad14                         | 1.59505e-12 | 1.000000 | 1.59505e-12 | 1.000000 |
| rad59                         | 1.41097e-12 | 1.000000 | 1.41097e-12 | 1.000000 |
| rad27                         | 1.40355e-12 | 1.000000 | 1.40355e-12 | 1.000000 |
| rad5                          | 7.09652e-13 | 1.000000 | 7.09652e-13 | 1.000000 |
| rad43                         | 2.09353e-13 | 1.000000 | 2.09353e-13 | 1.000000 |
| Phenyl+cycC3H4                | 3.86829e-14 | 1.000000 | 0.000000    | 1.000000 |
| rad62                         | 3.70812e-14 | 1.000000 | 3.70812e-14 | 1.000000 |
| rad50                         | 1.43245e-14 | 1.000000 | 1.43245e-14 | 1.000000 |
| rad33                         | 1.31027e-14 | 1.000000 | 1.31027e-14 | 1.000000 |
| rad25                         | 1.21599e-14 | 1.000000 | 1.21599e-14 | 1.000000 |
| rad18                         | 1.19262e-14 | 1.000000 | 1.19262e-14 | 1.000000 |
| PhcycC3H3_B+H                 | 8.05352e-15 | 1.000000 | 8.05352e-15 | 1.000000 |
| rad54                         | 5.73992e-15 | 1.000000 | 5.73992e-15 | 1.000000 |
| rad20                         | 1.32543e-15 | 1.000000 | 1.32543e-15 | 1.000000 |
| rad70                         | 9.69839e-16 | 1.000000 | 9.69839e-16 | 1.000000 |
| rad21                         | 8.21960e-16 | 1.000000 | 8.21960e-16 | 1.000000 |
| PAH1+H                        | 3.27160e-16 | 1.000000 | 3.27160e-16 | 1.000000 |
| rad58                         | 1.65507e-16 | 1.000000 | 1.65507e-16 | 1.000000 |
| rad52                         | 1.08043e-16 | 1.000000 | 1.08043e-16 | 1.000000 |
| rad55                         | 5.21586e-17 | 1.000000 | 5.21586e-17 | 1.000000 |
| rad51                         | 3.35658e-17 | 1.000000 | 3.35658e-17 | 1.000000 |
| rad31                         | 2.45730e-17 | 1.000000 | 2.45730e-17 | 1.000000 |
| rad34                         | 1.65648e-17 | 1.000000 | 1.65648e-17 | 1.000000 |

|           |             |          |             |          |
|-----------|-------------|----------|-------------|----------|
| rad41     | 1.29206e-17 | 1.000000 | 1.29206e-17 | 1.000000 |
| rad24     | 9.61277e-18 | 1.000000 | 9.61277e-18 | 1.000000 |
| rad42     | 7.66467e-18 | 1.000000 | 7.66467e-18 | 1.000000 |
| rad65     | 7.41711e-19 | 1.000000 | 7.41711e-19 | 1.000000 |
| rad53     | 1.18138e-21 | 1.000000 | 1.18138e-21 | 1.000000 |
| rad61     | 1.49377e-22 | 1.000000 | 1.49377e-22 | 1.000000 |
| rad64     | 9.09013e-23 | 1.000000 | 9.09013e-23 | 1.000000 |
| rad47     | 2.49264e-24 | 1.000000 | 2.49264e-24 | 1.000000 |
| rad56     | 4.79938e-25 | 1.000000 | 4.79938e-25 | 1.000000 |
| rad68syn  | 1.76489e-25 | 1.000000 | 1.76489e-25 | 1.000000 |
| rad68anti | 1.39406e-25 | 1.000000 | 1.39406e-25 | 1.000000 |
| rad40syn  | 4.93456e-28 | 1.000000 | 4.93456e-28 | 1.000000 |
| rad40anti | 4.08051e-28 | 1.000000 | 4.08051e-28 | 1.000000 |
| rad73     | 1.15727e-29 | 1.000000 | 1.15727e-29 | 1.000000 |
| PAH8+H    | 1.03351e-29 | 1.000000 | 1.03351e-29 | 1.000000 |
| rad71     | 5.26626e-33 | 1.000000 | 5.26626e-33 | 1.000000 |
| rad19syn  | 3.23634e-34 | 1.000000 | 3.23634e-34 | 1.000000 |
| rad8      | 6.71468e-51 | 1.000000 | 6.71468e-51 | 1.000000 |

100.000000 Pa, 170.000000 K

=====

| Rate constant             | True (fraction)        | Effective (fraction)   |
|---------------------------|------------------------|------------------------|
| Total                     | 9.49598e-15 (1.00 )    | 9.49598e-15 (1.00 )    |
| Formation of rad19        | 9.49586e-15 (1.000 )   | 9.49586e-15 (1.000 )   |
| H-abstraction to cyc2enyl | 1.24279e-19 (1.31e-05) | 1.24279e-19 (1.31e-05) |
| H-abstraction to cyc1enyl | 6.08025e-24 (6.40e-10) | 6.08025e-24 (6.40e-10) |

| species                       | PYtrue      | Cumul    | PYeffective | Cumul    |
|-------------------------------|-------------|----------|-------------|----------|
| Indene+H                      | 0.895784    | 0.895784 | 0.895784    | 0.895784 |
| rad9                          | 0.103883    | 0.999667 | 0.103883    | 0.999667 |
| PhCHCCH2+H                    | 0.000191901 | 0.999859 | 0.000191901 | 0.999859 |
| rad15                         | 0.000109676 | 0.999968 | 0.000109676 | 0.999968 |
| Benzene+cycloprop-2-enylidene | 1.30875e-05 | 0.999982 | 1.30875e-05 | 0.999982 |
| rad6                          | 9.82101e-06 | 0.999991 | 9.82101e-06 | 0.999991 |
| PhCCH+CH3                     | 2.15978e-06 | 0.999994 | 2.15978e-06 | 0.999994 |
| PhCCCH3+H                     | 1.46747e-06 | 0.999995 | 1.46747e-06 | 0.999995 |
| Ph+MeAc                       | 1.07853e-06 | 0.999996 | 1.07853e-06 | 0.999996 |
| C2H2+PhCH2                    | 9.99717e-07 | 0.999997 | 9.99717e-07 | 0.999997 |
| rad2                          | 8.73267e-07 | 0.999998 | 8.73267e-07 | 0.999998 |
| rad26                         | 5.34246e-07 | 0.999999 | 5.34246e-07 | 0.999999 |
| rad67                         | 4.46006e-07 | 0.999999 | 4.46006e-07 | 0.999999 |
| rad35                         | 1.95370e-07 | 0.999999 | 1.95370e-07 | 0.999999 |
| rad10                         | 8.60901e-08 | 0.999999 | 8.60901e-08 | 0.999999 |
| rad1                          | 5.79415e-08 | 0.999999 | 5.79415e-08 | 0.999999 |
| Ph+Allene                     | 1.62488e-08 | 0.999999 | 1.62488e-08 | 0.999999 |
| rad23                         | 1.35360e-08 | 0.999999 | 1.35360e-08 | 0.999999 |
| rad3                          | 9.86188e-09 | 0.999999 | 9.86188e-09 | 0.999999 |
| rad28                         | 6.72458e-09 | 0.999999 | 6.72458e-09 | 0.999999 |
| rad4                          | 5.04216e-09 | 0.999999 | 5.04216e-09 | 0.999999 |
| rad7                          | 3.56863e-09 | 0.999999 | 3.56863e-09 | 0.999999 |
| rad30                         | 3.43515e-09 | 0.999999 | 3.43515e-09 | 0.999999 |
| PhCH2CCH+H                    | 2.97412e-09 | 0.999999 | 2.97412e-09 | 0.999999 |
| rad37                         | 2.34518e-09 | 0.999999 | 2.34518e-09 | 0.999999 |
| rad11                         | 1.48414e-09 | 0.999999 | 1.48414e-09 | 0.999999 |
| rad45                         | 9.61478e-10 | 0.999999 | 9.61478e-10 | 0.999999 |
| Benzene+cycloprop-1-enylidene | 6.40297e-10 | 0.999999 | 6.40297e-10 | 0.999999 |
| rad12                         | 5.69039e-10 | 0.999999 | 5.69039e-10 | 0.999999 |
| PAH7+H                        | 1.89365e-10 | 0.999999 | 1.89365e-10 | 0.999999 |
| rad19anti                     | 1.71631e-10 | 0.999999 | 1.71631e-10 | 0.999999 |
| PAH9+H                        | 8.03674e-11 | 0.999999 | 8.03674e-11 | 0.999999 |
| rad36                         | 5.92709e-11 | 0.999999 | 5.92709e-11 | 0.999999 |
| rad39                         | 4.95693e-11 | 0.999999 | 4.95693e-11 | 0.999999 |
| rad22                         | 4.36421e-11 | 0.999999 | 4.36421e-11 | 0.999999 |
| rad38                         | 3.73604e-11 | 0.999999 | 3.73604e-11 | 0.999999 |
| rad60syn                      | 1.68138e-11 | 0.999999 | 1.68138e-11 | 0.999999 |
| rad13                         | 1.19355e-11 | 0.999999 | 1.19355e-11 | 0.999999 |
| rad60anti                     | 8.30815e-12 | 0.999999 | 8.30815e-12 | 0.999999 |
| PAH3+H                        | 8.03732e-12 | 0.999999 | 8.03732e-12 | 0.999999 |
| PhcycC3H3_A+H                 | 7.69909e-12 | 0.999999 | 7.69909e-12 | 0.999999 |
| PAH10+CH3                     | 4.04328e-12 | 0.999999 | 4.04328e-12 | 0.999999 |
| rad46                         | 2.12214e-12 | 0.999999 | 2.12214e-12 | 0.999999 |
| rad59                         | 1.61751e-12 | 0.999999 | 1.61751e-12 | 0.999999 |
| rad14                         | 1.47309e-12 | 0.999999 | 1.47309e-12 | 0.999999 |
| rad27                         | 1.29734e-12 | 0.999999 | 1.29734e-12 | 0.999999 |
| rad5                          | 5.93215e-13 | 0.999999 | 5.93215e-13 | 0.999999 |
| rad43                         | 2.58554e-13 | 0.999999 | 2.58554e-13 | 0.999999 |
| Phenyl+cycC3H4                | 5.71891e-14 | 0.999999 | 0.00000     | 0.999999 |
| rad62                         | 4.59191e-14 | 0.999999 | 4.59191e-14 | 0.999999 |

|               |             |          |             |          |
|---------------|-------------|----------|-------------|----------|
| rad50         | 1.73897e-14 | 0.999999 | 1.73897e-14 | 0.999999 |
| PhcycC3H3_B+H | 1.53445e-14 | 0.999999 | 1.53445e-14 | 0.999999 |
| rad33         | 1.38602e-14 | 0.999999 | 1.38602e-14 | 0.999999 |
| rad25         | 1.27121e-14 | 0.999999 | 1.27121e-14 | 0.999999 |
| rad18         | 1.15786e-14 | 0.999999 | 1.15786e-14 | 0.999999 |
| rad54         | 7.97113e-15 | 0.999999 | 7.97113e-15 | 0.999999 |
| rad20         | 1.28413e-15 | 0.999999 | 1.28413e-15 | 0.999999 |
| rad70         | 1.25876e-15 | 0.999999 | 1.25876e-15 | 0.999999 |
| rad21         | 7.96069e-16 | 0.999999 | 7.96069e-16 | 0.999999 |
| PAH1+H        | 4.88911e-16 | 0.999999 | 4.88911e-16 | 0.999999 |
| rad58         | 2.12723e-16 | 0.999999 | 2.12723e-16 | 0.999999 |
| rad52         | 1.36096e-16 | 0.999999 | 1.36096e-16 | 0.999999 |
| rad55         | 7.67284e-17 | 0.999999 | 7.67284e-17 | 0.999999 |
| rad51         | 4.41519e-17 | 0.999999 | 4.41519e-17 | 0.999999 |
| rad31         | 2.40083e-17 | 0.999999 | 2.40083e-17 | 0.999999 |
| rad34         | 2.30856e-17 | 0.999999 | 2.30856e-17 | 0.999999 |
| rad41         | 1.93607e-17 | 0.999999 | 1.93607e-17 | 0.999999 |
| rad42         | 1.11504e-17 | 0.999999 | 1.11504e-17 | 0.999999 |
| rad24         | 8.41737e-18 | 0.999999 | 8.41737e-18 | 0.999999 |
| rad65         | 9.96768e-19 | 0.999999 | 9.96768e-19 | 0.999999 |
| rad53         | 2.73098e-21 | 0.999999 | 2.73098e-21 | 0.999999 |
| rad61         | 5.09384e-22 | 0.999999 | 5.09384e-22 | 0.999999 |
| rad64         | 2.59294e-22 | 0.999999 | 2.59294e-22 | 0.999999 |
| rad47         | 2.59580e-24 | 0.999999 | 2.59580e-24 | 0.999999 |
| rad56         | 2.04533e-24 | 0.999999 | 2.04533e-24 | 0.999999 |
| rad68syn      | 7.45753e-25 | 0.999999 | 7.45753e-25 | 0.999999 |
| rad68anti     | 5.85328e-25 | 0.999999 | 5.85328e-25 | 0.999999 |
| rad40syn      | 3.43378e-27 | 0.999999 | 3.43378e-27 | 0.999999 |
| rad40anti     | 2.86539e-27 | 0.999999 | 2.86539e-27 | 0.999999 |
| PAH8+H        | 1.03197e-28 | 0.999999 | 1.03197e-28 | 0.999999 |
| rad73         | 7.54521e-29 | 0.999999 | 7.54521e-29 | 0.999999 |
| rad71         | 6.18015e-32 | 0.999999 | 6.18015e-32 | 0.999999 |
| rad19syn      | 8.89442e-34 | 0.999999 | 8.89442e-34 | 0.999999 |
| rad8          | 8.67682e-51 | 0.999999 | 8.67682e-51 | 0.999999 |

100.000000 Pa, 180.000000 K

=====

| Rate constant             | True (fraction)        | Effective (fraction)   |
|---------------------------|------------------------|------------------------|
| Total                     | 1.12884e-14 (1.00 )    | 1.12884e-14 (1.00 )    |
| Formation of rad19        | 1.12881e-14 (1.000 )   | 1.12881e-14 (1.000 )   |
| H-abstraction to cyc2enyl | 2.75916e-19 (2.44e-05) | 2.75916e-19 (2.44e-05) |
| H-abstraction to cyc1enyl | 2.39955e-23 (2.13e-09) | 2.39955e-23 (2.13e-09) |

| species                       | PYtrue      | Cumul    | PYeffective | Cumul    |
|-------------------------------|-------------|----------|-------------|----------|
| Indene+H                      | 0.909525    | 0.909525 | 0.909525    | 0.909525 |
| rad9                          | 0.0901314   | 0.999656 | 0.0901314   | 0.999656 |
| PhCHCCH2+H                    | 0.000205634 | 0.999862 | 0.000205634 | 0.999862 |
| rad15                         | 9.44709e-05 | 0.999956 | 9.44709e-05 | 0.999956 |
| Benzene+cycloprop-2-enylidene | 2.44424e-05 | 0.999981 | 2.44424e-05 | 0.999981 |
| rad6                          | 1.04946e-05 | 0.999991 | 1.04946e-05 | 0.999991 |
| PhCCH+CH3                     | 2.37825e-06 | 0.999994 | 2.37825e-06 | 0.999994 |
| PhCCCH3+H                     | 1.62777e-06 | 0.999995 | 1.62777e-06 | 0.999995 |
| Ph+MeAc                       | 1.21451e-06 | 0.999996 | 1.21451e-06 | 0.999996 |
| C2H2+PhCH2                    | 1.09441e-06 | 0.999998 | 1.09441e-06 | 0.999998 |
| rad2                          | 8.14121e-07 | 0.999998 | 8.14121e-07 | 0.999998 |
| rad26                         | 5.24825e-07 | 0.999999 | 5.24825e-07 | 0.999999 |
| rad67                         | 4.86474e-07 | 0.999999 | 4.86474e-07 | 0.999999 |
| rad35                         | 2.12537e-07 | 1.000000 | 2.12537e-07 | 1.000000 |
| rad10                         | 7.99919e-08 | 1.000000 | 7.99919e-08 | 1.000000 |
| rad1                          | 5.43673e-08 | 1.000000 | 5.43673e-08 | 1.000000 |
| Ph+Allene                     | 1.88477e-08 | 1.000000 | 1.88477e-08 | 1.000000 |
| rad23                         | 1.20889e-08 | 1.000000 | 1.20889e-08 | 1.000000 |
| rad3                          | 9.16012e-09 | 1.000000 | 9.16012e-09 | 1.000000 |
| rad28                         | 7.74130e-09 | 1.000000 | 7.74130e-09 | 1.000000 |
| rad4                          | 4.69148e-09 | 1.000000 | 4.69148e-09 | 1.000000 |
| rad7                          | 3.77154e-09 | 1.000000 | 3.77154e-09 | 1.000000 |
| rad30                         | 3.74354e-09 | 1.000000 | 3.74354e-09 | 1.000000 |
| PhCH2CCH+H                    | 3.48099e-09 | 1.000000 | 3.48099e-09 | 1.000000 |
| rad37                         | 2.77867e-09 | 1.000000 | 2.77867e-09 | 1.000000 |
| Benzene+cycloprop-1-enylidene | 2.12567e-09 | 1.000000 | 2.12567e-09 | 1.000000 |
| rad11                         | 1.56189e-09 | 1.000000 | 1.56189e-09 | 1.000000 |
| rad45                         | 8.48014e-10 | 1.000000 | 8.48014e-10 | 1.000000 |
| rad12                         | 4.96905e-10 | 1.000000 | 4.96905e-10 | 1.000000 |
| PAH7+H                        | 2.55187e-10 | 1.000000 | 2.55187e-10 | 1.000000 |
| rad19anti                     | 1.48319e-10 | 1.000000 | 1.48319e-10 | 1.000000 |
| PAH9+H                        | 9.13076e-11 | 1.000000 | 9.13076e-11 | 1.000000 |
| rad39                         | 6.74629e-11 | 1.000000 | 6.74629e-11 | 1.000000 |
| rad36                         | 5.23848e-11 | 1.000000 | 5.23848e-11 | 1.000000 |

|                |             |          |             |          |
|----------------|-------------|----------|-------------|----------|
| rad38          | 4.33727e-11 | 1.000000 | 4.33727e-11 | 1.000000 |
| rad22          | 4.15757e-11 | 1.000000 | 4.15757e-11 | 1.000000 |
| rad60syn       | 1.88015e-11 | 1.000000 | 1.88015e-11 | 1.000000 |
| rad13          | 1.25849e-11 | 1.000000 | 1.25849e-11 | 1.000000 |
| PhcycC3H3_A+H  | 1.00290e-11 | 1.000000 | 1.00290e-11 | 1.000000 |
| rad60anti      | 9.31159e-12 | 1.000000 | 9.31159e-12 | 1.000000 |
| PAH3+H         | 9.28096e-12 | 1.000000 | 9.28096e-12 | 1.000000 |
| PAH10+CH3      | 5.30382e-12 | 1.000000 | 5.30382e-12 | 1.000000 |
| rad46          | 2.45236e-12 | 1.000000 | 2.45236e-12 | 1.000000 |
| rad59          | 1.85840e-12 | 1.000000 | 1.85840e-12 | 1.000000 |
| rad14          | 1.35654e-12 | 1.000000 | 1.35654e-12 | 1.000000 |
| rad27          | 1.19553e-12 | 1.000000 | 1.19553e-12 | 1.000000 |
| rad5           | 4.97443e-13 | 1.000000 | 4.97443e-13 | 1.000000 |
| rad43          | 3.19194e-13 | 1.000000 | 3.19194e-13 | 1.000000 |
| Phenyl+cycC3H4 | 8.44565e-14 | 1.000000 | 0.00000     | 1.000000 |
| rad62          | 5.68103e-14 | 1.000000 | 5.68103e-14 | 1.000000 |
| PhcycC3H3_B+H  | 2.82395e-14 | 1.000000 | 2.82395e-14 | 1.000000 |
| rad50          | 2.11816e-14 | 1.000000 | 2.11816e-14 | 1.000000 |
| rad33          | 1.46519e-14 | 1.000000 | 1.46519e-14 | 1.000000 |
| rad25          | 1.32900e-14 | 1.000000 | 1.32900e-14 | 1.000000 |
| rad18          | 1.12984e-14 | 1.000000 | 1.12984e-14 | 1.000000 |
| rad54          | 1.11417e-14 | 1.000000 | 1.11417e-14 | 1.000000 |
| rad70          | 1.64842e-15 | 1.000000 | 1.64842e-15 | 1.000000 |
| rad20          | 1.25220e-15 | 1.000000 | 1.25220e-15 | 1.000000 |
| rad21          | 7.76078e-16 | 1.000000 | 7.76078e-16 | 1.000000 |
| PAH1+H         | 7.31664e-16 | 1.000000 | 7.31664e-16 | 1.000000 |
| rad58          | 2.75281e-16 | 1.000000 | 2.75281e-16 | 1.000000 |
| rad52          | 1.72310e-16 | 1.000000 | 1.72310e-16 | 1.000000 |
| rad55          | 1.13795e-16 | 1.000000 | 1.13795e-16 | 1.000000 |
| rad51          | 5.84803e-17 | 1.000000 | 5.84803e-17 | 1.000000 |
| rad34          | 3.24974e-17 | 1.000000 | 3.24974e-17 | 1.000000 |
| rad41          | 2.89560e-17 | 1.000000 | 2.89560e-17 | 1.000000 |
| rad31          | 2.34552e-17 | 1.000000 | 2.34552e-17 | 1.000000 |
| rad42          | 1.61874e-17 | 1.000000 | 1.61874e-17 | 1.000000 |
| rad24          | 7.44661e-18 | 1.000000 | 7.44661e-18 | 1.000000 |
| rad65          | 1.34876e-18 | 1.000000 | 1.34876e-18 | 1.000000 |
| rad53          | 6.15785e-21 | 1.000000 | 6.15785e-21 | 1.000000 |
| rad61          | 1.57951e-21 | 1.000000 | 1.57951e-21 | 1.000000 |
| rad64          | 7.06125e-22 | 1.000000 | 7.06125e-22 | 1.000000 |
| rad56          | 7.83278e-24 | 1.000000 | 7.83278e-24 | 1.000000 |
| rad68syn       | 2.78714e-24 | 1.000000 | 2.78714e-24 | 1.000000 |
| rad47          | 2.71976e-24 | 1.000000 | 2.71976e-24 | 1.000000 |
| rad68anti      | 2.17271e-24 | 1.000000 | 2.17271e-24 | 1.000000 |
| rad40syn       | 1.97439e-26 | 1.000000 | 1.97439e-26 | 1.000000 |
| rad40anti      | 1.66077e-26 | 1.000000 | 1.66077e-26 | 1.000000 |
| PAH8+H         | 8.19674e-28 | 1.000000 | 8.19674e-28 | 1.000000 |
| rad73          | 4.16892e-28 | 1.000000 | 4.16892e-28 | 1.000000 |
| rad71          | 5.70545e-31 | 1.000000 | 5.70545e-31 | 1.000000 |
| rad19syn       | 2.57278e-33 | 1.000000 | 2.57278e-33 | 1.000000 |
| rad8           | 1.14218e-50 | 1.000000 | 1.14218e-50 | 1.000000 |

100.000000 Pa, 190.000000 K

=====

| Rate constant             | True (fraction)        | Effective (fraction)   |
|---------------------------|------------------------|------------------------|
| Total                     | 1.32132e-14 (1.00 )    | 1.32132e-14 (1.00 )    |
| Formation of rad19        | 1.32126e-14 (1.000 )   | 1.32126e-14 (1.000 )   |
| H-abstraction to cyc2enyl | 5.62053e-19 (4.25e-05) | 5.62053e-19 (4.25e-05) |
| H-abstraction to cyclenyl | 8.18073e-23 (6.19e-09) | 8.18073e-23 (6.19e-09) |

| species                       | PYtrue      | Cumul    | PYeffective | Cumul    |
|-------------------------------|-------------|----------|-------------|----------|
| Indene+H                      | 0.921577    | 0.921577 | 0.921577    | 0.921577 |
| rad9                          | 0.0780590   | 0.999636 | 0.0780590   | 0.999636 |
| PhCHCCH2+H                    | 0.000220201 | 0.999856 | 0.000220201 | 0.999856 |
| rad15                         | 8.12673e-05 | 0.999937 | 8.12673e-05 | 0.999937 |
| Benzene+cycloprop-2-enylidene | 4.25373e-05 | 0.999980 | 4.25373e-05 | 0.999980 |
| rad6                          | 1.11963e-05 | 0.999991 | 1.11963e-05 | 0.999991 |
| PhCCH+CH3                     | 2.60989e-06 | 0.999994 | 2.60989e-06 | 0.999994 |
| PhCCCH3+H                     | 1.80016e-06 | 0.999995 | 1.80016e-06 | 0.999995 |
| Ph+MeAc                       | 1.36412e-06 | 0.999997 | 1.36412e-06 | 0.999997 |
| C2H2+PhCH2                    | 1.19895e-06 | 0.999998 | 1.19895e-06 | 0.999998 |
| rad2                          | 7.56029e-07 | 0.999999 | 7.56029e-07 | 0.999999 |
| rad67                         | 5.30608e-07 | 0.999999 | 5.30608e-07 | 0.999999 |
| rad26                         | 5.11952e-07 | 1.000000 | 5.11952e-07 | 1.000000 |
| rad35                         | 2.31187e-07 | 1.000000 | 2.31187e-07 | 1.000000 |
| rad10                         | 7.40578e-08 | 1.000000 | 7.40578e-08 | 1.000000 |
| rad1                          | 5.08437e-08 | 1.000000 | 5.08437e-08 | 1.000000 |
| Ph+Allene                     | 2.19563e-08 | 1.000000 | 2.19563e-08 | 1.000000 |
| rad23                         | 1.08972e-08 | 1.000000 | 1.08972e-08 | 1.000000 |

|                               |             |         |             |         |
|-------------------------------|-------------|---------|-------------|---------|
| rad28                         | 8.86802e-09 | 1.00000 | 8.86802e-09 | 1.00000 |
| rad3                          | 8.47896e-09 | 1.00000 | 8.47896e-09 | 1.00000 |
| Benzene+cycloprop-1-enylidene | 6.19133e-09 | 1.00000 | 6.19133e-09 | 1.00000 |
| rad4                          | 4.35084e-09 | 1.00000 | 4.35084e-09 | 1.00000 |
| PhCH2CCH+H                    | 4.09256e-09 | 1.00000 | 4.09256e-09 | 1.00000 |
| rad30                         | 4.08022e-09 | 1.00000 | 4.08022e-09 | 1.00000 |
| rad7                          | 3.98246e-09 | 1.00000 | 3.98246e-09 | 1.00000 |
| rad37                         | 3.28148e-09 | 1.00000 | 3.28148e-09 | 1.00000 |
| rad11                         | 1.64283e-09 | 1.00000 | 1.64283e-09 | 1.00000 |
| rad45                         | 7.55667e-10 | 1.00000 | 7.55667e-10 | 1.00000 |
| rad12                         | 4.33509e-10 | 1.00000 | 4.33509e-10 | 1.00000 |
| PAH7+H                        | 3.43877e-10 | 1.00000 | 3.43877e-10 | 1.00000 |
| rad19anti                     | 1.28283e-10 | 1.00000 | 1.28283e-10 | 1.00000 |
| PAH9+H                        | 1.03835e-10 | 1.00000 | 1.03835e-10 | 1.00000 |
| rad39                         | 9.16784e-11 | 1.00000 | 9.16784e-11 | 1.00000 |
| rad38                         | 5.04555e-11 | 1.00000 | 5.04555e-11 | 1.00000 |
| rad36                         | 4.67939e-11 | 1.00000 | 4.67939e-11 | 1.00000 |
| rad22                         | 4.00020e-11 | 1.00000 | 4.00020e-11 | 1.00000 |
| rad60syn                      | 2.10533e-11 | 1.00000 | 2.10533e-11 | 1.00000 |
| rad13                         | 1.32617e-11 | 1.00000 | 1.32617e-11 | 1.00000 |
| PhcycC3H3_A+H                 | 1.31444e-11 | 1.00000 | 1.31444e-11 | 1.00000 |
| PAH3+H                        | 1.07493e-11 | 1.00000 | 1.07493e-11 | 1.00000 |
| rad60anti                     | 1.04518e-11 | 1.00000 | 1.04518e-11 | 1.00000 |
| PAH10+CH3                     | 6.95927e-12 | 1.00000 | 6.95927e-12 | 1.00000 |
| rad46                         | 2.83903e-12 | 1.00000 | 2.83903e-12 | 1.00000 |
| rad59                         | 2.14094e-12 | 1.00000 | 2.14094e-12 | 1.00000 |
| rad14                         | 1.24579e-12 | 1.00000 | 1.24579e-12 | 1.00000 |
| rad27                         | 1.09849e-12 | 1.00000 | 1.09849e-12 | 1.00000 |
| rad5                          | 4.18179e-13 | 1.00000 | 4.18179e-13 | 1.00000 |
| rad43                         | 3.94120e-13 | 1.00000 | 3.94120e-13 | 1.00000 |
| Phenyl+cycC3H4                | 1.24603e-13 | 1.00000 | 0.00000     | 1.00000 |
| rad62                         | 7.02570e-14 | 1.00000 | 7.02570e-14 | 1.00000 |
| PhcycC3H3_B+H                 | 5.04923e-14 | 1.00000 | 5.04923e-14 | 1.00000 |
| rad50                         | 2.59093e-14 | 1.00000 | 2.59093e-14 | 1.00000 |
| rad54                         | 1.56818e-14 | 1.00000 | 1.56818e-14 | 1.00000 |
| rad33                         | 1.54827e-14 | 1.00000 | 1.54827e-14 | 1.00000 |
| rad25                         | 1.38962e-14 | 1.00000 | 1.38962e-14 | 1.00000 |
| rad18                         | 1.10759e-14 | 1.00000 | 1.10759e-14 | 1.00000 |
| rad70                         | 2.17874e-15 | 1.00000 | 2.17874e-15 | 1.00000 |
| rad20                         | 1.22843e-15 | 1.00000 | 1.22843e-15 | 1.00000 |
| PAH1+H                        | 1.09574e-15 | 1.00000 | 1.09574e-15 | 1.00000 |
| rad21                         | 7.61221e-16 | 1.00000 | 7.61221e-16 | 1.00000 |
| rad58                         | 3.58671e-16 | 1.00000 | 3.58671e-16 | 1.00000 |
| rad52                         | 2.19448e-16 | 1.00000 | 2.19448e-16 | 1.00000 |
| rad55                         | 1.70124e-16 | 1.00000 | 1.70124e-16 | 1.00000 |
| rad51                         | 7.80409e-17 | 1.00000 | 7.80409e-17 | 1.00000 |
| rad34                         | 4.61951e-17 | 1.00000 | 4.61951e-17 | 1.00000 |
| rad41                         | 4.32063e-17 | 1.00000 | 4.32063e-17 | 1.00000 |
| rad42                         | 2.34452e-17 | 1.00000 | 2.34452e-17 | 1.00000 |
| rad31                         | 2.29281e-17 | 1.00000 | 2.29281e-17 | 1.00000 |
| rad24                         | 6.66130e-18 | 1.00000 | 6.66130e-18 | 1.00000 |
| rad65                         | 1.83842e-18 | 1.00000 | 1.83842e-18 | 1.00000 |
| rad53                         | 1.35776e-20 | 1.00000 | 1.35776e-20 | 1.00000 |
| rad61                         | 4.51521e-21 | 1.00000 | 4.51521e-21 | 1.00000 |
| rad64                         | 1.84310e-21 | 1.00000 | 1.84310e-21 | 1.00000 |
| rad56                         | 2.73942e-23 | 1.00000 | 2.73942e-23 | 1.00000 |
| rad68syn                      | 9.40497e-24 | 1.00000 | 9.40497e-24 | 1.00000 |
| rad68anti                     | 7.27919e-24 | 1.00000 | 7.27919e-24 | 1.00000 |
| rad47                         | 2.87074e-24 | 1.00000 | 2.87074e-24 | 1.00000 |
| rad40syn                      | 9.66643e-26 | 1.00000 | 9.66643e-26 | 1.00000 |
| rad40anti                     | 8.18522e-26 | 1.00000 | 8.18522e-26 | 1.00000 |
| PAH8+H                        | 5.36204e-27 | 1.00000 | 5.36204e-27 | 1.00000 |
| rad73                         | 2.00261e-27 | 1.00000 | 2.00261e-27 | 1.00000 |
| rad71                         | 4.29354e-30 | 1.00000 | 4.29354e-30 | 1.00000 |
| rad19syn                      | 7.83398e-33 | 1.00000 | 7.83398e-33 | 1.00000 |
| rad8                          | 1.53049e-50 | 1.00000 | 1.53049e-50 | 1.00000 |

100.000000 Pa, 200.000000 K

| Rate constant             | True (fraction)        | Effective (fraction)   |             |          |
|---------------------------|------------------------|------------------------|-------------|----------|
| Total                     | 1.52621e-14 (1.00 )    | 1.52621e-14 (1.00 )    |             |          |
| Formation of rad19        | 1.52610e-14 (1.000 )   | 1.52610e-14 (1.000 )   |             |          |
| H-abstraction to cyc2enyl | 1.06427e-18 (6.97e-05) | 1.06427e-18 (6.97e-05) |             |          |
| H-abstraction to cyclenyl | 2.46309e-22 (1.61e-08) | 2.46309e-22 (1.61e-08) |             |          |
| species                   | PYtrue                 | Cumul                  | PYeffective | Cumul    |
| Indene+H                  | 0.932129               | 0.932129               | 0.932129    | 0.932129 |
| rad9                      | 0.0674735              | 0.999602               | 0.0674735   | 0.999602 |

|                               |             |          |             |          |
|-------------------------------|-------------|----------|-------------|----------|
| PhCHCCH2+H                    | 0.000235720 | 0.999838 | 0.000235720 | 0.999838 |
| rad15                         | 6.98049e-05 | 0.999908 | 6.98049e-05 | 0.999908 |
| Benzene+cycloprop-2-enylidene | 6.97330e-05 | 0.999978 | 6.97330e-05 | 0.999978 |
| rad6                          | 1.19290e-05 | 0.999990 | 1.19290e-05 | 0.999990 |
| PhCCH+CH3                     | 2.85607e-06 | 0.999993 | 2.85607e-06 | 0.999993 |
| PhCCCH3+H                     | 1.98605e-06 | 0.999995 | 1.98605e-06 | 0.999995 |
| Ph+MeAc                       | 1.52910e-06 | 0.999996 | 1.52910e-06 | 0.999996 |
| C2H2+PhCH2                    | 1.31497e-06 | 0.999997 | 1.31497e-06 | 0.999997 |
| rad2                          | 6.99492e-07 | 0.999998 | 6.99492e-07 | 0.999998 |
| rad67                         | 5.78937e-07 | 0.999999 | 5.78937e-07 | 0.999999 |
| rad26                         | 4.95932e-07 | 0.999999 | 4.95932e-07 | 0.999999 |
| rad35                         | 2.51532e-07 | 0.999999 | 2.51532e-07 | 0.999999 |
| rad10                         | 6.83285e-08 | 0.999999 | 6.83285e-08 | 0.999999 |
| rad1                          | 4.74023e-08 | 0.999999 | 4.74023e-08 | 0.999999 |
| Ph+Allene                     | 2.57026e-08 | 1.000000 | 2.57026e-08 | 1.000000 |
| Benzene+cycloprop-1-enylidene | 1.61386e-08 | 1.000000 | 1.61386e-08 | 1.000000 |
| rad28                         | 1.01116e-08 | 1.000000 | 1.01116e-08 | 1.000000 |
| rad23                         | 9.92357e-09 | 1.000000 | 9.92357e-09 | 1.000000 |
| rad3                          | 7.82302e-09 | 1.000000 | 7.82302e-09 | 1.000000 |
| PhCH2CCH+H                    | 4.83575e-09 | 1.000000 | 4.83575e-09 | 1.000000 |
| rad30                         | 4.44943e-09 | 1.000000 | 4.44943e-09 | 1.000000 |
| rad7                          | 4.20235e-09 | 1.000000 | 4.20235e-09 | 1.000000 |
| rad4                          | 4.02261e-09 | 1.000000 | 4.02261e-09 | 1.000000 |
| rad37                         | 3.86431e-09 | 1.000000 | 3.86431e-09 | 1.000000 |
| rad11                         | 1.72732e-09 | 1.000000 | 1.72732e-09 | 1.000000 |
| rad45                         | 6.80879e-10 | 1.000000 | 6.80879e-10 | 1.000000 |
| PAH7+H                        | 4.63410e-10 | 1.000000 | 4.63410e-10 | 1.000000 |
| rad12                         | 3.77799e-10 | 1.000000 | 3.77799e-10 | 1.000000 |
| rad39                         | 1.24433e-10 | 1.000000 | 1.24433e-10 | 1.000000 |
| PAH9+H                        | 1.18271e-10 | 1.000000 | 1.18271e-10 | 1.000000 |
| rad19anti                     | 1.11034e-10 | 1.000000 | 1.11034e-10 | 1.000000 |
| rad38                         | 5.88453e-11 | 1.000000 | 5.88453e-11 | 1.000000 |
| rad36                         | 4.22817e-11 | 1.000000 | 4.22817e-11 | 1.000000 |
| rad22                         | 3.88459e-11 | 1.000000 | 3.88459e-11 | 1.000000 |
| rad60syn                      | 2.36160e-11 | 1.000000 | 2.36160e-11 | 1.000000 |
| PhcycC3H3_A+H                 | 1.73206e-11 | 1.000000 | 1.73206e-11 | 1.000000 |
| rad13                         | 1.39692e-11 | 1.000000 | 1.39692e-11 | 1.000000 |
| PAH3+H                        | 1.24918e-11 | 1.000000 | 1.24918e-11 | 1.000000 |
| rad60anti                     | 1.17534e-11 | 1.000000 | 1.17534e-11 | 1.000000 |
| PAH10+CH3                     | 9.13353e-12 | 1.000000 | 9.13353e-12 | 1.000000 |
| rad46                         | 3.29478e-12 | 1.000000 | 3.29478e-12 | 1.000000 |
| rad59                         | 2.47396e-12 | 1.000000 | 2.47396e-12 | 1.000000 |
| rad14                         | 1.14111e-12 | 1.000000 | 1.14111e-12 | 1.000000 |
| rad27                         | 1.00650e-12 | 1.000000 | 1.00650e-12 | 1.000000 |
| rad43                         | 4.86872e-13 | 1.000000 | 4.86872e-13 | 1.000000 |
| rad5                          | 3.52243e-13 | 1.000000 | 3.52243e-13 | 1.000000 |
| Phenyl+cycC3H4                | 1.83626e-13 | 1.000000 | 0.000000    | 1.000000 |
| PhcycC3H3_B+H                 | 8.80984e-14 | 1.000000 | 8.80984e-14 | 1.000000 |
| rad62                         | 8.68817e-14 | 1.000000 | 8.68817e-14 | 1.000000 |
| rad50                         | 3.18471e-14 | 1.000000 | 3.18471e-14 | 1.000000 |
| rad54                         | 2.22253e-14 | 1.000000 | 2.22253e-14 | 1.000000 |
| rad33                         | 1.63569e-14 | 1.000000 | 1.63569e-14 | 1.000000 |
| rad25                         | 1.45334e-14 | 1.000000 | 1.45334e-14 | 1.000000 |
| rad18                         | 1.09036e-14 | 1.000000 | 1.09036e-14 | 1.000000 |
| rad70                         | 2.90647e-15 | 1.000000 | 2.90647e-15 | 1.000000 |
| PAH1+H                        | 1.64083e-15 | 1.000000 | 1.64083e-15 | 1.000000 |
| rad20                         | 1.21187e-15 | 1.000000 | 1.21187e-15 | 1.000000 |
| rad21                         | 7.50902e-16 | 1.000000 | 7.50902e-16 | 1.000000 |
| rad58                         | 4.70388e-16 | 1.000000 | 4.70388e-16 | 1.000000 |
| rad52                         | 2.81274e-16 | 1.000000 | 2.81274e-16 | 1.000000 |
| rad55                         | 2.56222e-16 | 1.000000 | 2.56222e-16 | 1.000000 |
| rad51                         | 1.04953e-16 | 1.000000 | 1.04953e-16 | 1.000000 |
| rad34                         | 6.62739e-17 | 1.000000 | 6.62739e-17 | 1.000000 |
| rad41                         | 6.42864e-17 | 1.000000 | 6.42864e-17 | 1.000000 |
| rad42                         | 3.38653e-17 | 1.000000 | 3.38653e-17 | 1.000000 |
| rad31                         | 2.24400e-17 | 1.000000 | 2.24400e-17 | 1.000000 |
| rad24                         | 6.02991e-18 | 1.000000 | 6.02991e-18 | 1.000000 |
| rad65                         | 2.52440e-18 | 1.000000 | 2.52440e-18 | 1.000000 |
| rad53                         | 2.93263e-20 | 1.000000 | 2.93263e-20 | 1.000000 |
| rad61                         | 1.20330e-20 | 1.000000 | 1.20330e-20 | 1.000000 |
| rad64                         | 4.62577e-21 | 1.000000 | 4.62577e-21 | 1.000000 |
| rad56                         | 8.86321e-23 | 1.000000 | 8.86321e-23 | 1.000000 |
| rad68syn                      | 2.91301e-23 | 1.000000 | 2.91301e-23 | 1.000000 |
| rad68anti                     | 2.23804e-23 | 1.000000 | 2.23804e-23 | 1.000000 |
| rad47                         | 3.05655e-24 | 1.000000 | 3.05655e-24 | 1.000000 |
| rad40syn                      | 4.12841e-25 | 1.000000 | 4.12841e-25 | 1.000000 |
| rad40anti                     | 3.51420e-25 | 1.000000 | 3.51420e-25 | 1.000000 |
| PAH8+H                        | 2.96991e-26 | 1.000000 | 2.96991e-26 | 1.000000 |
| rad73                         | 8.53667e-27 | 1.000000 | 8.53667e-27 | 1.000000 |
| rad71                         | 2.70698e-29 | 1.000000 | 2.70698e-29 | 1.000000 |

|          |             |          |             |          |
|----------|-------------|----------|-------------|----------|
| rad19syn | 2.51057e-32 | 1.000000 | 2.51057e-32 | 1.000000 |
| rad8     | 2.08655e-50 | 1.000000 | 2.08655e-50 | 1.000000 |

100.000000 Pa, 210.000000 K

=====

| Rate constant             | True (fraction)        | Effective (fraction)   |
|---------------------------|------------------------|------------------------|
| Total                     | 1.74272e-14 (1.00 )    | 1.74272e-14 (1.00 )    |
| Formation of rad19        | 1.74253e-14 (1.000 )   | 1.74253e-14 (1.000 )   |
| H-abstraction to cyc2enyl | 1.89310e-18 (0.000109) | 1.89310e-18 (0.000109) |
| H-abstraction to cyclenyl | 6.66714e-22 (3.83e-08) | 6.66714e-22 (3.83e-08) |

| species                       | PYtrue      | Cumul    | PYeffective | Cumul    |
|-------------------------------|-------------|----------|-------------|----------|
| Indene+H                      | 0.941350    | 0.941350 | 0.941350    | 0.941350 |
| rad9                          | 0.0582061   | 0.999556 | 0.0582061   | 0.999556 |
| PhCHCCH2+H                    | 0.000252317 | 0.999808 | 0.000252317 | 0.999808 |
| Benzene+cycloprop-2-enylidene | 0.000108629 | 0.999917 | 0.000108629 | 0.999917 |
| rad15                         | 5.98617e-05 | 0.999977 | 5.98617e-05 | 0.999977 |
| rad6                          | 1.26952e-05 | 0.999989 | 1.26952e-05 | 0.999989 |
| PhCCH+CH3                     | 3.11832e-06 | 0.999992 | 3.11832e-06 | 0.999992 |
| PhCCCH3+H                     | 2.18694e-06 | 0.999995 | 2.18694e-06 | 0.999995 |
| Ph+MeAc                       | 1.71140e-06 | 0.999996 | 1.71140e-06 | 0.999996 |
| C2H2+PhCH2                    | 1.44442e-06 | 0.999998 | 1.44442e-06 | 0.999998 |
| rad2                          | 6.44916e-07 | 0.999998 | 6.44916e-07 | 0.999998 |
| rad67                         | 6.32034e-07 | 0.999999 | 6.32034e-07 | 0.999999 |
| rad26                         | 4.77118e-07 | 0.999999 | 4.77118e-07 | 0.999999 |
| rad35                         | 2.73802e-07 | 1.000000 | 2.73802e-07 | 1.000000 |
| rad10                         | 6.28356e-08 | 1.000000 | 6.28356e-08 | 1.000000 |
| rad1                          | 4.40677e-08 | 1.000000 | 4.40677e-08 | 1.000000 |
| Benzene+cycloprop-1-enylidene | 3.82571e-08 | 1.000000 | 3.82571e-08 | 1.000000 |
| Ph+Allene                     | 3.02496e-08 | 1.000000 | 3.02496e-08 | 1.000000 |
| rad28                         | 1.14775e-08 | 1.000000 | 1.14775e-08 | 1.000000 |
| rad23                         | 9.13593e-09 | 1.000000 | 9.13593e-09 | 1.000000 |
| rad3                          | 7.19585e-09 | 1.000000 | 7.19585e-09 | 1.000000 |
| PhCH2CCH+H                    | 5.74492e-09 | 1.000000 | 5.74492e-09 | 1.000000 |
| rad30                         | 4.85587e-09 | 1.000000 | 4.85587e-09 | 1.000000 |
| rad37                         | 4.53935e-09 | 1.000000 | 4.53935e-09 | 1.000000 |
| rad7                          | 4.43198e-09 | 1.000000 | 4.43198e-09 | 1.000000 |
| rad4                          | 3.70852e-09 | 1.000000 | 3.70852e-09 | 1.000000 |
| rad11                         | 1.81562e-09 | 1.000000 | 1.81562e-09 | 1.000000 |
| PAH7+H                        | 6.24387e-10 | 1.000000 | 6.24387e-10 | 1.000000 |
| rad45                         | 6.20728e-10 | 1.000000 | 6.20728e-10 | 1.000000 |
| rad12                         | 3.28871e-10 | 1.000000 | 3.28871e-10 | 1.000000 |
| rad39                         | 1.68677e-10 | 1.000000 | 1.68677e-10 | 1.000000 |
| PAH9+H                        | 1.35005e-10 | 1.000000 | 1.35005e-10 | 1.000000 |
| rad19anti                     | 9.61720e-11 | 1.000000 | 9.61720e-11 | 1.000000 |
| rad38                         | 6.88297e-11 | 1.000000 | 6.88297e-11 | 1.000000 |
| rad36                         | 3.86715e-11 | 1.000000 | 3.86715e-11 | 1.000000 |
| rad22                         | 3.80451e-11 | 1.000000 | 3.80451e-11 | 1.000000 |
| rad60syn                      | 2.65441e-11 | 1.000000 | 2.65441e-11 | 1.000000 |
| PhcycC3H3_A+H                 | 2.29279e-11 | 1.000000 | 2.29279e-11 | 1.000000 |
| rad13                         | 1.47101e-11 | 1.000000 | 1.47101e-11 | 1.000000 |
| PAH3+H                        | 1.45688e-11 | 1.000000 | 1.45688e-11 | 1.000000 |
| rad60anti                     | 1.32452e-11 | 1.000000 | 1.32452e-11 | 1.000000 |
| PAH10+CH3                     | 1.19872e-11 | 1.000000 | 1.19872e-11 | 1.000000 |
| rad46                         | 3.83522e-12 | 1.000000 | 3.83522e-12 | 1.000000 |
| rad59                         | 2.86814e-12 | 1.000000 | 2.86814e-12 | 1.000000 |
| rad14                         | 1.04266e-12 | 1.000000 | 1.04266e-12 | 1.000000 |
| rad27                         | 9.19708e-13 | 1.000000 | 9.19708e-13 | 1.000000 |
| rad43                         | 6.01839e-13 | 1.000000 | 6.01839e-13 | 1.000000 |
| rad5                          | 2.97164e-13 | 1.000000 | 2.97164e-13 | 1.000000 |
| Phenyl+cycC3H4                | 2.70226e-13 | 1.000000 | 0.000000    | 1.000000 |
| PhcycC3H3_B+H                 | 1.50503e-13 | 1.000000 | 1.50503e-13 | 1.000000 |
| rad62                         | 1.07452e-13 | 1.000000 | 1.07452e-13 | 1.000000 |
| rad50                         | 3.93545e-14 | 1.000000 | 3.93545e-14 | 1.000000 |
| rad54                         | 3.17058e-14 | 1.000000 | 3.17058e-14 | 1.000000 |
| rad33                         | 1.72785e-14 | 1.000000 | 1.72785e-14 | 1.000000 |
| rad25                         | 1.52035e-14 | 1.000000 | 1.52035e-14 | 1.000000 |
| rad18                         | 1.07755e-14 | 1.000000 | 1.07755e-14 | 1.000000 |
| rad70                         | 3.91243e-15 | 1.000000 | 3.91243e-15 | 1.000000 |
| PAH1+H                        | 2.45479e-15 | 1.000000 | 2.45479e-15 | 1.000000 |
| rad20                         | 1.20178e-15 | 1.000000 | 1.20178e-15 | 1.000000 |
| rad21                         | 7.44653e-16 | 1.000000 | 7.44653e-16 | 1.000000 |
| rad58                         | 6.20662e-16 | 1.000000 | 6.20662e-16 | 1.000000 |
| rad55                         | 3.88376e-16 | 1.000000 | 3.88376e-16 | 1.000000 |
| rad52                         | 3.62935e-16 | 1.000000 | 3.62935e-16 | 1.000000 |
| rad51                         | 1.42236e-16 | 1.000000 | 1.42236e-16 | 1.000000 |
| rad34                         | 9.58846e-17 | 1.000000 | 9.58846e-17 | 1.000000 |
| rad41                         | 9.53267e-17 | 1.000000 | 9.53267e-17 | 1.000000 |

|           |             |          |             |          |
|-----------|-------------|----------|-------------|----------|
| rad42     | 4.87640e-17 | 1.000000 | 4.87640e-17 | 1.000000 |
| rad31     | 2.20034e-17 | 1.000000 | 2.20034e-17 | 1.000000 |
| rad24     | 5.52698e-18 | 1.000000 | 5.52698e-18 | 1.000000 |
| rad65     | 3.49138e-18 | 1.000000 | 3.49138e-18 | 1.000000 |
| rad53     | 6.21204e-20 | 1.000000 | 6.21204e-20 | 1.000000 |
| rad61     | 3.01700e-20 | 1.000000 | 3.01700e-20 | 1.000000 |
| rad64     | 1.11922e-20 | 1.000000 | 1.11922e-20 | 1.000000 |
| rad56     | 2.67979e-22 | 1.000000 | 2.67979e-22 | 1.000000 |
| rad68syn  | 8.39044e-23 | 1.000000 | 8.39044e-23 | 1.000000 |
| rad68anti | 6.39892e-23 | 1.000000 | 6.39892e-23 | 1.000000 |
| rad47     | 3.28733e-24 | 1.000000 | 3.28733e-24 | 1.000000 |
| rad40syn  | 1.56828e-24 | 1.000000 | 1.56828e-24 | 1.000000 |
| rad40anti | 1.34014e-24 | 1.000000 | 1.34014e-24 | 1.000000 |
| PAH8+H    | 1.42352e-25 | 1.000000 | 1.42352e-25 | 1.000000 |
| rad73     | 3.28161e-26 | 1.000000 | 3.28161e-26 | 1.000000 |
| rad71     | 1.46050e-28 | 1.000000 | 1.46050e-28 | 1.000000 |
| rad19syn  | 8.46283e-32 | 1.000000 | 8.46283e-32 | 1.000000 |
| rad8      | 2.89333e-50 | 1.000000 | 2.89333e-50 | 1.000000 |

100.000000 Pa, 220.000000 K

=====

| Rate constant             | True (fraction)        | Effective (fraction)   |
|---------------------------|------------------------|------------------------|
| Total                     | 1.97009e-14 (1.00 )    | 1.97009e-14 (1.00 )    |
| Formation of rad19        | 1.96977e-14 (1.000 )   | 1.96977e-14 (1.000 )   |
| H-abstraction to cyc2enyl | 3.19064e-18 (0.000162) | 3.19064e-18 (0.000162) |
| H-abstraction to cyclenyl | 1.64627e-21 (8.36e-08) | 1.64627e-21 (8.36e-08) |

| species                       | PYtrue      | Cumul    | PYeffective | Cumul    |
|-------------------------------|-------------|----------|-------------|----------|
| Indene+H                      | 0.949384    | 0.949384 | 0.949384    | 0.949384 |
| rad9                          | 0.0501079   | 0.999492 | 0.0501079   | 0.999492 |
| PhCHCCH2+H                    | 0.000270119 | 0.999762 | 0.000270119 | 0.999762 |
| Benzene+cycloprop-2-enylidene | 0.000161954 | 0.999924 | 0.000161954 | 0.999924 |
| rad15                         | 5.12466e-05 | 0.999975 | 5.12466e-05 | 0.999975 |
| rad6                          | 1.34972e-05 | 0.999989 | 1.34972e-05 | 0.999989 |
| PhCCH+CH3                     | 3.39825e-06 | 0.999992 | 3.39825e-06 | 0.999992 |
| PhCCCH3+H                     | 2.40445e-06 | 0.999995 | 2.40445e-06 | 0.999995 |
| Ph+MeAc                       | 1.91319e-06 | 0.999997 | 1.91319e-06 | 0.999997 |
| C2H2+PhCH2                    | 1.58950e-06 | 0.999998 | 1.58950e-06 | 0.999998 |
| rad67                         | 6.90533e-07 | 0.999999 | 6.90533e-07 | 0.999999 |
| rad2                          | 5.92617e-07 | 0.999999 | 5.92617e-07 | 0.999999 |
| rad26                         | 4.55896e-07 | 1.000000 | 4.55896e-07 | 1.000000 |
| rad35                         | 2.98249e-07 | 1.000000 | 2.98249e-07 | 1.000000 |
| Benzene+cycloprop-1-enylidene | 8.35632e-08 | 1.000000 | 8.35632e-08 | 1.000000 |
| rad10                         | 5.76031e-08 | 1.000000 | 5.76031e-08 | 1.000000 |
| rad1                          | 4.08600e-08 | 1.000000 | 4.08600e-08 | 1.000000 |
| Ph+Allene                     | 3.58035e-08 | 1.000000 | 3.58035e-08 | 1.000000 |
| rad28                         | 1.29693e-08 | 1.000000 | 1.29693e-08 | 1.000000 |
| rad23                         | 8.50710e-09 | 1.000000 | 8.50710e-09 | 1.000000 |
| PhCH2CCH+H                    | 6.86384e-09 | 1.000000 | 6.86384e-09 | 1.000000 |
| rad3                          | 6.60005e-09 | 1.000000 | 6.60005e-09 | 1.000000 |
| rad37                         | 5.32029e-09 | 1.000000 | 5.32029e-09 | 1.000000 |
| rad30                         | 5.30477e-09 | 1.000000 | 5.30477e-09 | 1.000000 |
| rad7                          | 4.67198e-09 | 1.000000 | 4.67198e-09 | 1.000000 |
| rad4                          | 3.40990e-09 | 1.000000 | 3.40990e-09 | 1.000000 |
| rad11                         | 1.90798e-09 | 1.000000 | 1.90798e-09 | 1.000000 |
| PAH7+H                        | 8.40815e-10 | 1.000000 | 8.40815e-10 | 1.000000 |
| rad45                         | 5.72814e-10 | 1.000000 | 5.72814e-10 | 1.000000 |
| rad12                         | 2.85944e-10 | 1.000000 | 2.85944e-10 | 1.000000 |
| rad39                         | 2.28304e-10 | 1.000000 | 2.28304e-10 | 1.000000 |
| PAH9+H                        | 1.54511e-10 | 1.000000 | 1.54511e-10 | 1.000000 |
| rad19anti                     | 8.33601e-11 | 1.000000 | 8.33601e-11 | 1.000000 |
| rad38                         | 8.07583e-11 | 1.000000 | 8.07583e-11 | 1.000000 |
| rad22                         | 3.75478e-11 | 1.000000 | 3.75478e-11 | 1.000000 |
| rad36                         | 3.58186e-11 | 1.000000 | 3.58186e-11 | 1.000000 |
| PhcycC3H3_A+H                 | 3.04627e-11 | 1.000000 | 3.04627e-11 | 1.000000 |
| rad60syn                      | 2.99012e-11 | 1.000000 | 2.99012e-11 | 1.000000 |
| PAH3+H                        | 1.70535e-11 | 1.000000 | 1.70535e-11 | 1.000000 |
| PAH10+CH3                     | 1.57276e-11 | 1.000000 | 1.57276e-11 | 1.000000 |
| rad13                         | 1.54865e-11 | 1.000000 | 1.54865e-11 | 1.000000 |
| rad60anti                     | 1.49609e-11 | 1.000000 | 1.49609e-11 | 1.000000 |
| rad46                         | 4.47965e-12 | 1.000000 | 4.47965e-12 | 1.000000 |
| rad59                         | 3.33638e-12 | 1.000000 | 3.33638e-12 | 1.000000 |
| rad14                         | 9.50486e-13 | 1.000000 | 9.50486e-13 | 1.000000 |
| rad27                         | 8.38212e-13 | 1.000000 | 8.38212e-13 | 1.000000 |
| rad43                         | 7.44446e-13 | 1.000000 | 7.44446e-13 | 1.000000 |
| Phenyl+cycC3H4                | 3.96956e-13 | 1.000000 | 0.000000    | 1.000000 |
| PhcycC3H3_B+H                 | 2.52391e-13 | 1.000000 | 2.52391e-13 | 1.000000 |
| rad5                          | 2.50998e-13 | 1.000000 | 2.50998e-13 | 1.000000 |



|           |             |         |             |         |
|-----------|-------------|---------|-------------|---------|
| rad62     | 1.32915e-13 | 1.00000 | 1.32915e-13 | 1.00000 |
| rad50     | 4.89051e-14 | 1.00000 | 4.89051e-14 | 1.00000 |
| rad54     | 4.54948e-14 | 1.00000 | 4.54948e-14 | 1.00000 |
| rad33     | 1.82511e-14 | 1.00000 | 1.82511e-14 | 1.00000 |
| rad25     | 1.59086e-14 | 1.00000 | 1.59086e-14 | 1.00000 |
| rad18     | 1.06865e-14 | 1.00000 | 1.06865e-14 | 1.00000 |
| rad70     | 5.31193e-15 | 1.00000 | 5.31193e-15 | 1.00000 |
| PAH1+H    | 3.66635e-15 | 1.00000 | 3.66635e-15 | 1.00000 |
| rad20     | 1.19758e-15 | 1.00000 | 1.19758e-15 | 1.00000 |
| rad58     | 8.23414e-16 | 1.00000 | 8.23414e-16 | 1.00000 |
| rad21     | 7.42106e-16 | 1.00000 | 7.42106e-16 | 1.00000 |
| rad55     | 5.91742e-16 | 1.00000 | 5.91742e-16 | 1.00000 |
| rad52     | 4.71468e-16 | 1.00000 | 4.71468e-16 | 1.00000 |
| rad51     | 1.94204e-16 | 1.00000 | 1.94204e-16 | 1.00000 |
| rad41     | 1.40798e-16 | 1.00000 | 1.40798e-16 | 1.00000 |
| rad34     | 1.39768e-16 | 1.00000 | 1.39768e-16 | 1.00000 |
| rad42     | 6.99696e-17 | 1.00000 | 6.99696e-17 | 1.00000 |
| rad31     | 2.16306e-17 | 1.00000 | 2.16306e-17 | 1.00000 |
| rad24     | 5.13187e-18 | 1.00000 | 5.13187e-18 | 1.00000 |
| rad65     | 4.86171e-18 | 1.00000 | 4.86171e-18 | 1.00000 |
| rad53     | 1.29139e-19 | 1.00000 | 1.29139e-19 | 1.00000 |
| rad61     | 7.17007e-20 | 1.00000 | 7.17007e-20 | 1.00000 |
| rad64     | 2.61615e-20 | 1.00000 | 2.61615e-20 | 1.00000 |
| rad56     | 7.63043e-22 | 1.00000 | 7.63043e-22 | 1.00000 |
| rad68syn  | 2.27049e-22 | 1.00000 | 2.27049e-22 | 1.00000 |
| rad68anti | 1.71913e-22 | 1.00000 | 1.71913e-22 | 1.00000 |
| rad40syn  | 5.38168e-24 | 1.00000 | 5.38168e-24 | 1.00000 |
| rad40anti | 4.61087e-24 | 1.00000 | 4.61087e-24 | 1.00000 |
| rad47     | 3.57649e-24 | 1.00000 | 3.57649e-24 | 1.00000 |
| PAH8+H    | 6.00776e-25 | 1.00000 | 6.00776e-25 | 1.00000 |
| rad73     | 1.15177e-25 | 1.00000 | 1.15177e-25 | 1.00000 |
| rad71     | 6.85843e-28 | 1.00000 | 6.85843e-28 | 1.00000 |
| rad19syn  | 2.99756e-31 | 1.00000 | 2.99756e-31 | 1.00000 |
| rad8      | 4.08009e-50 | 1.00000 | 4.08009e-50 | 1.00000 |

100.000000 Pa, 230.000000 K

=====

| Rate constant             | True (fraction)        | Effective (fraction)   |
|---------------------------|------------------------|------------------------|
| Total                     | 2.20761e-14 (1.00 )    | 2.20761e-14 (1.00 )    |
| Formation of rad19        | 2.20710e-14 (1.000 )   | 2.20710e-14 (1.000 )   |
| H-abstraction to cyc2enyl | 5.13155e-18 (0.000232) | 5.13155e-18 (0.000232) |
| H-abstraction to cyclenyl | 3.75316e-21 (1.70e-07) | 3.75316e-21 (1.70e-07) |

| species                       | PYtrue      | Cumul    | PYeffective | Cumul    |
|-------------------------------|-------------|----------|-------------|----------|
| Indene+H                      | 0.956361    | 0.956361 | 0.956361    | 0.956361 |
| rad9                          | 0.0430465   | 0.999408 | 0.0430465   | 0.999408 |
| PhCHCCH2+H                    | 0.000289266 | 0.999697 | 0.000289266 | 0.999697 |
| Benzene+cycloprop-2-enylidene | 0.000232448 | 0.999930 | 0.000232448 | 0.999930 |
| rad15                         | 4.37938e-05 | 0.999973 | 4.37938e-05 | 0.999973 |
| rad6                          | 1.43366e-05 | 0.999988 | 1.43366e-05 | 0.999988 |
| PhCCH+CH3                     | 3.69766e-06 | 0.999992 | 3.69766e-06 | 0.999992 |
| PhCCCH3+H                     | 2.64035e-06 | 0.999994 | 2.64035e-06 | 0.999994 |
| Ph+MeAc                       | 2.13683e-06 | 0.999996 | 2.13683e-06 | 0.999996 |
| C2H2+PhCH2                    | 1.75276e-06 | 0.999998 | 1.75276e-06 | 0.999998 |
| rad67                         | 7.55126e-07 | 0.999999 | 7.55126e-07 | 0.999999 |
| rad2                          | 5.42842e-07 | 0.999999 | 5.42842e-07 | 0.999999 |
| rad26                         | 4.32685e-07 | 1.000000 | 4.32685e-07 | 1.000000 |
| rad35                         | 3.25144e-07 | 1.000000 | 3.25144e-07 | 1.000000 |
| Benzene+cycloprop-1-enylidene | 1.70010e-07 | 1.000000 | 1.70010e-07 | 1.000000 |
| rad10                         | 5.26489e-08 | 1.000000 | 5.26489e-08 | 1.000000 |
| Ph+Allene                     | 4.26263e-08 | 1.000000 | 4.26263e-08 | 1.000000 |
| rad1                          | 3.77946e-08 | 1.000000 | 3.77946e-08 | 1.000000 |
| rad28                         | 1.45887e-08 | 1.000000 | 1.45887e-08 | 1.000000 |
| PhCH2CCH+H                    | 8.24838e-09 | 1.000000 | 8.24838e-09 | 1.000000 |
| rad23                         | 8.01391e-09 | 1.000000 | 8.01391e-09 | 1.000000 |
| rad37                         | 6.22261e-09 | 1.000000 | 6.22261e-09 | 1.000000 |
| rad3                          | 6.03756e-09 | 1.000000 | 6.03756e-09 | 1.000000 |
| rad30                         | 5.80188e-09 | 1.000000 | 5.80188e-09 | 1.000000 |
| rad7                          | 4.92278e-09 | 1.000000 | 4.92278e-09 | 1.000000 |
| rad4                          | 3.12772e-09 | 1.000000 | 3.12772e-09 | 1.000000 |
| rad11                         | 2.00454e-09 | 1.000000 | 2.00454e-09 | 1.000000 |
| PAH7+H                        | 1.13105e-09 | 1.000000 | 1.13105e-09 | 1.000000 |
| rad45                         | 5.35155e-10 | 1.000000 | 5.35155e-10 | 1.000000 |
| rad39                         | 3.08413e-10 | 1.000000 | 3.08413e-10 | 1.000000 |
| rad12                         | 2.48327e-10 | 1.000000 | 2.48327e-10 | 1.000000 |
| PAH9+H                        | 1.77358e-10 | 1.000000 | 1.77358e-10 | 1.000000 |
| rad38                         | 9.50556e-11 | 1.000000 | 9.50556e-11 | 1.000000 |
| rad19anti                     | 7.23147e-11 | 1.000000 | 7.23147e-11 | 1.000000 |

|                |             |         |             |         |
|----------------|-------------|---------|-------------|---------|
| PhcycC3H3_A+H  | 4.05886e-11 | 1.00000 | 4.05886e-11 | 1.00000 |
| rad22          | 3.73103e-11 | 1.00000 | 3.73103e-11 | 1.00000 |
| rad60syn       | 3.37606e-11 | 1.00000 | 3.37606e-11 | 1.00000 |
| rad36          | 3.36041e-11 | 1.00000 | 3.36041e-11 | 1.00000 |
| PAH10+CH3      | 2.06208e-11 | 1.00000 | 2.06208e-11 | 1.00000 |
| PAH3+H         | 2.00354e-11 | 1.00000 | 2.00354e-11 | 1.00000 |
| rad60anti      | 1.69395e-11 | 1.00000 | 1.69395e-11 | 1.00000 |
| rad13          | 1.62998e-11 | 1.00000 | 1.62998e-11 | 1.00000 |
| rad46          | 5.25197e-12 | 1.00000 | 5.25197e-12 | 1.00000 |
| rad59          | 3.89425e-12 | 1.00000 | 3.89425e-12 | 1.00000 |
| rad43          | 9.21381e-13 | 1.00000 | 9.21381e-13 | 1.00000 |
| rad14          | 8.64595e-13 | 1.00000 | 8.64595e-13 | 1.00000 |
| rad27          | 7.62038e-13 | 1.00000 | 7.62038e-13 | 1.00000 |
| Phenyl+cycC3H4 | 5.81829e-13 | 1.00000 | 0.00000     | 1.00000 |
| PhcycC3H3_B+H  | 4.16313e-13 | 1.00000 | 4.16313e-13 | 1.00000 |
| rad5           | 2.12202e-13 | 1.00000 | 2.12202e-13 | 1.00000 |
| rad62          | 1.64433e-13 | 1.00000 | 1.64433e-13 | 1.00000 |
| rad54          | 6.56012e-14 | 1.00000 | 6.56012e-14 | 1.00000 |
| rad50          | 6.11227e-14 | 1.00000 | 6.11227e-14 | 1.00000 |
| rad33          | 1.92776e-14 | 1.00000 | 1.92776e-14 | 1.00000 |
| rad25          | 1.66495e-14 | 1.00000 | 1.66495e-14 | 1.00000 |
| rad18          | 1.06321e-14 | 1.00000 | 1.06321e-14 | 1.00000 |
| rad70          | 7.26956e-15 | 1.00000 | 7.26956e-15 | 1.00000 |
| PAH1+H         | 5.46298e-15 | 1.00000 | 5.46298e-15 | 1.00000 |
| rad20          | 1.19879e-15 | 1.00000 | 1.19879e-15 | 1.00000 |
| rad58          | 1.09756e-15 | 1.00000 | 1.09756e-15 | 1.00000 |
| rad55          | 9.05004e-16 | 1.00000 | 9.05004e-16 | 1.00000 |
| rad21          | 7.42961e-16 | 1.00000 | 7.42961e-16 | 1.00000 |
| rad52          | 6.16530e-16 | 1.00000 | 6.16530e-16 | 1.00000 |
| rad51          | 2.67026e-16 | 1.00000 | 2.67026e-16 | 1.00000 |
| rad41          | 2.07042e-16 | 1.00000 | 2.07042e-16 | 1.00000 |
| rad34          | 2.05053e-16 | 1.00000 | 2.05053e-16 | 1.00000 |
| rad42          | 1.00006e-16 | 1.00000 | 1.00006e-16 | 1.00000 |
| rad31          | 2.13343e-17 | 1.00000 | 2.13343e-17 | 1.00000 |
| rad65          | 6.81233e-18 | 1.00000 | 6.81233e-18 | 1.00000 |
| rad24          | 4.82777e-18 | 1.00000 | 4.82777e-18 | 1.00000 |
| rad53          | 2.63552e-19 | 1.00000 | 2.63552e-19 | 1.00000 |
| rad61          | 1.62496e-19 | 1.00000 | 1.62496e-19 | 1.00000 |
| rad64          | 5.91761e-20 | 1.00000 | 5.91761e-20 | 1.00000 |
| rad56          | 2.05792e-21 | 1.00000 | 2.05792e-21 | 1.00000 |
| rad68syn       | 5.81753e-22 | 1.00000 | 5.81753e-22 | 1.00000 |
| rad68anti      | 4.37453e-22 | 1.00000 | 4.37453e-22 | 1.00000 |
| rad40syn       | 1.68887e-23 | 1.00000 | 1.68887e-23 | 1.00000 |
| rad40anti      | 1.44917e-23 | 1.00000 | 1.44917e-23 | 1.00000 |
| rad47          | 3.94195e-24 | 1.00000 | 3.94195e-24 | 1.00000 |
| PAH8+H         | 2.26366e-24 | 1.00000 | 2.26366e-24 | 1.00000 |
| rad73          | 3.72534e-25 | 1.00000 | 3.72534e-25 | 1.00000 |
| rad71          | 2.84237e-27 | 1.00000 | 2.84237e-27 | 1.00000 |
| rad19syn       | 1.11401e-30 | 1.00000 | 1.11401e-30 | 1.00000 |
| rad8           | 5.85121e-50 | 1.00000 | 5.85121e-50 | 1.00000 |

100.000000 Pa, 240.000000 K

=====

| Rate constant             | True (fraction)        | Effective (fraction)   |
|---------------------------|------------------------|------------------------|
| Total                     | 2.45462e-14 (1.00 )    | 2.45462e-14 (1.00 )    |
| Formation of rad19        | 2.45383e-14 (1.000 )   | 2.45383e-14 (1.000 )   |
| H-abstraction to cyc2enyl | 7.92234e-18 (0.000323) | 7.92234e-18 (0.000323) |
| H-abstraction to cyclenyl | 7.97958e-21 (3.25e-07) | 7.97958e-21 (3.25e-07) |

| species                       | PYtrue      | Cumul    | PYeffective | Cumul    |
|-------------------------------|-------------|----------|-------------|----------|
| Indene+H                      | 0.962397    | 0.962397 | 0.962397    | 0.962397 |
| rad9                          | 0.0369039   | 0.999301 | 0.0369039   | 0.999301 |
| Benzene+cycloprop-2-enylidene | 0.000322752 | 0.999624 | 0.000322752 | 0.999624 |
| PhCHCCH2+H                    | 0.000309899 | 0.999933 | 0.000309899 | 0.999933 |
| rad15                         | 3.73583e-05 | 0.999971 | 3.73583e-05 | 0.999971 |
| rad6                          | 1.52143e-05 | 0.999986 | 1.52143e-05 | 0.999986 |
| PhCCH+CH3                     | 4.01846e-06 | 0.999990 | 4.01846e-06 | 0.999990 |
| PhCCCH3+H                     | 2.89655e-06 | 0.999993 | 2.89655e-06 | 0.999993 |
| Ph+MeAc                       | 2.38496e-06 | 0.999995 | 2.38496e-06 | 0.999995 |
| C2H2+PhCH2                    | 1.93713e-06 | 0.999997 | 1.93713e-06 | 0.999997 |
| rad67                         | 8.26569e-07 | 0.999998 | 8.26569e-07 | 0.999998 |
| rad2                          | 4.95773e-07 | 0.999999 | 4.95773e-07 | 0.999999 |
| rad26                         | 4.07925e-07 | 0.999999 | 4.07925e-07 | 0.999999 |
| rad35                         | 3.54787e-07 | 0.999999 | 3.54787e-07 | 0.999999 |
| Benzene+cycloprop-1-enylidene | 3.25084e-07 | 1.000000 | 3.25084e-07 | 1.000000 |
| Ph+Allene                     | 5.10502e-08 | 1.000000 | 5.10502e-08 | 1.000000 |
| rad10                         | 4.79856e-08 | 1.000000 | 4.79856e-08 | 1.000000 |
| rad1                          | 3.48833e-08 | 1.000000 | 3.48833e-08 | 1.000000 |

|                |             |          |             |          |
|----------------|-------------|----------|-------------|----------|
| rad28          | 1.63344e-08 | 1.000000 | 1.63344e-08 | 1.000000 |
| PhCH2CCH+H     | 9.96984e-09 | 1.000000 | 9.96984e-09 | 1.000000 |
| rad23          | 7.63652e-09 | 1.000000 | 7.63652e-09 | 1.000000 |
| rad37          | 7.26374e-09 | 1.000000 | 7.26374e-09 | 1.000000 |
| rad30          | 6.35362e-09 | 1.000000 | 6.35362e-09 | 1.000000 |
| rad3           | 5.50967e-09 | 1.000000 | 5.50967e-09 | 1.000000 |
| rad7           | 5.18455e-09 | 1.000000 | 5.18455e-09 | 1.000000 |
| rad4           | 2.86264e-09 | 1.000000 | 2.86264e-09 | 1.000000 |
| rad11          | 2.10535e-09 | 1.000000 | 2.10535e-09 | 1.000000 |
| PAH7+H         | 1.51891e-09 | 1.000000 | 1.51891e-09 | 1.000000 |
| rad45          | 5.06108e-10 | 1.000000 | 5.06108e-10 | 1.000000 |
| rad39          | 4.15626e-10 | 1.000000 | 4.15626e-10 | 1.000000 |
| rad12          | 2.15419e-10 | 1.000000 | 2.15419e-10 | 1.000000 |
| PAH9+H         | 2.04235e-10 | 1.000000 | 2.04235e-10 | 1.000000 |
| rad38          | 1.12237e-10 | 1.000000 | 1.12237e-10 | 1.000000 |
| rad19anti      | 6.27950e-11 | 1.000000 | 6.27950e-11 | 1.000000 |
| PhcycC3H3_A+H  | 5.41885e-11 | 1.000000 | 5.41885e-11 | 1.000000 |
| rad60syn       | 3.82083e-11 | 1.000000 | 3.82083e-11 | 1.000000 |
| rad22          | 3.72948e-11 | 1.000000 | 3.72948e-11 | 1.000000 |
| rad36          | 3.19300e-11 | 1.000000 | 3.19300e-11 | 1.000000 |
| PAH10+CH3      | 2.70073e-11 | 1.000000 | 2.70073e-11 | 1.000000 |
| PAH3+H         | 2.36234e-11 | 1.000000 | 2.36234e-11 | 1.000000 |
| rad60anti      | 1.92266e-11 | 1.000000 | 1.92266e-11 | 1.000000 |
| rad13          | 1.71510e-11 | 1.000000 | 1.71510e-11 | 1.000000 |
| rad46          | 6.18181e-12 | 1.000000 | 6.18181e-12 | 1.000000 |
| rad59          | 4.56056e-12 | 1.000000 | 4.56056e-12 | 1.000000 |
| rad43          | 1.14085e-12 | 1.000000 | 1.14085e-12 | 1.000000 |
| Phenyl+cycC3H4 | 8.50545e-13 | 1.000000 | 0.00000     | 1.000000 |
| rad14          | 7.84927e-13 | 1.000000 | 7.84927e-13 | 1.000000 |
| rad27          | 6.91166e-13 | 1.000000 | 6.91166e-13 | 1.000000 |
| PhcycC3H3_B+H  | 6.76463e-13 | 1.000000 | 6.76463e-13 | 1.000000 |
| rad62          | 2.03430e-13 | 1.000000 | 2.03430e-13 | 1.000000 |
| rad5           | 1.79533e-13 | 1.000000 | 1.79533e-13 | 1.000000 |
| rad54          | 9.49530e-14 | 1.000000 | 9.49530e-14 | 1.000000 |
| rad50          | 7.68310e-14 | 1.000000 | 7.68310e-14 | 1.000000 |
| rad33          | 2.03602e-14 | 1.000000 | 2.03602e-14 | 1.000000 |
| rad25          | 1.74267e-14 | 1.000000 | 1.74267e-14 | 1.000000 |
| rad18          | 1.06086e-14 | 1.000000 | 1.06086e-14 | 1.000000 |
| rad70          | 1.00202e-14 | 1.000000 | 1.00202e-14 | 1.000000 |
| PAH1+H         | 8.11632e-15 | 1.000000 | 8.11632e-15 | 1.000000 |
| rad58          | 1.46878e-15 | 1.000000 | 1.46878e-15 | 1.000000 |
| rad55          | 1.38725e-15 | 1.000000 | 1.38725e-15 | 1.000000 |
| rad20          | 1.20502e-15 | 1.000000 | 1.20502e-15 | 1.000000 |
| rad52          | 8.11376e-16 | 1.000000 | 8.11376e-16 | 1.000000 |
| rad21          | 7.46978e-16 | 1.000000 | 7.46978e-16 | 1.000000 |
| rad51          | 3.69533e-16 | 1.000000 | 3.69533e-16 | 1.000000 |
| rad41          | 3.02978e-16 | 1.000000 | 3.02978e-16 | 1.000000 |
| rad34          | 3.02435e-16 | 1.000000 | 3.02435e-16 | 1.000000 |
| rad42          | 1.42333e-16 | 1.000000 | 1.42333e-16 | 1.000000 |
| rad31          | 2.11286e-17 | 1.000000 | 2.11286e-17 | 1.000000 |
| rad65          | 9.59905e-18 | 1.000000 | 9.59905e-18 | 1.000000 |
| rad24          | 4.60096e-18 | 1.000000 | 4.60096e-18 | 1.000000 |
| rad53          | 5.28000e-19 | 1.000000 | 5.28000e-19 | 1.000000 |
| rad61          | 3.52895e-19 | 1.000000 | 3.52895e-19 | 1.000000 |
| rad64          | 1.29688e-19 | 1.000000 | 1.29688e-19 | 1.000000 |
| rad56          | 5.27836e-21 | 1.000000 | 5.27836e-21 | 1.000000 |
| rad68syn       | 1.41947e-21 | 1.000000 | 1.41947e-21 | 1.000000 |
| rad68anti      | 1.06052e-21 | 1.000000 | 1.06052e-21 | 1.000000 |
| rad40syn       | 4.89382e-23 | 1.000000 | 4.89382e-23 | 1.000000 |
| rad40anti      | 4.20172e-23 | 1.000000 | 4.20172e-23 | 1.000000 |
| PAH8+H         | 7.70088e-24 | 1.000000 | 7.70088e-24 | 1.000000 |
| rad47          | 4.40823e-24 | 1.000000 | 4.40823e-24 | 1.000000 |
| rad73          | 1.11813e-24 | 1.000000 | 1.11813e-24 | 1.000000 |
| rad71          | 1.05183e-26 | 1.000000 | 1.05183e-26 | 1.000000 |
| rad19syn       | 4.33542e-30 | 1.000000 | 4.33542e-30 | 1.000000 |
| rad8           | 8.53460e-50 | 1.000000 | 8.53460e-50 | 1.000000 |

100.000000 Pa, 250.000000 K

| Rate constant             | True (fraction)        | Effective (fraction)   |
|---------------------------|------------------------|------------------------|
| Total                     | 2.71048e-14 (1.00 )    | 2.71048e-14 (1.00 )    |
| Formation of rad19        | 2.70930e-14 (1.000 )   | 2.70930e-14 (1.000 )   |
| H-abstraction to cyc2enyl | 1.17991e-17 (0.000435) | 1.17991e-17 (0.000435) |
| H-abstraction to cyclenyl | 1.59554e-20 (5.89e-07) | 1.59554e-20 (5.89e-07) |

  

| species  | PYtrue    | Cumul    | PYeffective | Cumul    |
|----------|-----------|----------|-------------|----------|
| Indene+H | 0.967595  | 0.967595 | 0.967595    | 0.967595 |
| rad9     | 0.0315742 | 0.999169 | 0.0315742   | 0.999169 |

|                               |             |          |             |          |
|-------------------------------|-------------|----------|-------------|----------|
| Benzene+cycloprop-2-enylidene | 0.000435312 | 0.999605 | 0.000435312 | 0.999605 |
| PhCHCH2+H                     | 0.000332171 | 0.999937 | 0.000332171 | 0.999937 |
| rad15                         | 3.18126e-05 | 0.999969 | 3.18126e-05 | 0.999969 |
| rad6                          | 1.61303e-05 | 0.999985 | 1.61303e-05 | 0.999985 |
| PhCCH+CH3                     | 4.36279e-06 | 0.999989 | 4.36279e-06 | 0.999989 |
| PhCCCH3+H                     | 3.17512e-06 | 0.999992 | 3.17512e-06 | 0.999992 |
| Ph+MeAc                       | 2.66046e-06 | 0.999995 | 2.66046e-06 | 0.999995 |
| C2H2+PhCH2                    | 2.14601e-06 | 0.999997 | 2.14601e-06 | 0.999997 |
| rad67                         | 9.05690e-07 | 0.999998 | 9.05690e-07 | 0.999998 |
| Benzene+cycloprop-1-enylidene | 5.88656e-07 | 0.999999 | 5.88656e-07 | 0.999999 |
| rad2                          | 4.51541e-07 | 0.999999 | 4.51541e-07 | 0.999999 |
| rad35                         | 3.87501e-07 | 0.999999 | 3.87501e-07 | 0.999999 |
| rad26                         | 3.82063e-07 | 1.000000 | 3.82063e-07 | 1.000000 |
| Ph+Allene                     | 6.14957e-08 | 1.000000 | 6.14957e-08 | 1.000000 |
| rad10                         | 4.36213e-08 | 1.000000 | 4.36213e-08 | 1.000000 |
| rad1                          | 3.21351e-08 | 1.000000 | 3.21351e-08 | 1.000000 |
| rad28                         | 1.82025e-08 | 1.000000 | 1.82025e-08 | 1.000000 |
| PhCH2CCH+H                    | 1.21191e-08 | 1.000000 | 1.21191e-08 | 1.000000 |
| rad37                         | 8.46332e-09 | 1.000000 | 8.46332e-09 | 1.000000 |
| rad23                         | 7.35796e-09 | 1.000000 | 7.35796e-09 | 1.000000 |
| rad30                         | 6.96706e-09 | 1.000000 | 6.96706e-09 | 1.000000 |
| rad7                          | 5.45721e-09 | 1.000000 | 5.45721e-09 | 1.000000 |
| rad3                          | 5.01712e-09 | 1.000000 | 5.01712e-09 | 1.000000 |
| rad4                          | 2.61506e-09 | 1.000000 | 2.61506e-09 | 1.000000 |
| rad11                         | 2.21036e-09 | 1.000000 | 2.21036e-09 | 1.000000 |
| PAH7+H                        | 2.03513e-09 | 1.000000 | 2.03513e-09 | 1.000000 |
| rad39                         | 5.58451e-10 | 1.000000 | 5.58451e-10 | 1.000000 |
| rad45                         | 4.84306e-10 | 1.000000 | 4.84306e-10 | 1.000000 |
| PAH9+H                        | 2.35982e-10 | 1.000000 | 2.35982e-10 | 1.000000 |
| rad12                         | 1.86682e-10 | 1.000000 | 1.86682e-10 | 1.000000 |
| rad38                         | 1.32925e-10 | 1.000000 | 1.32925e-10 | 1.000000 |
| PhcycC3H3_A+H                 | 7.24326e-11 | 1.000000 | 7.24326e-11 | 1.000000 |
| rad19anti                     | 5.45941e-11 | 1.000000 | 5.45941e-11 | 1.000000 |
| rad60syn                      | 4.33431e-11 | 1.000000 | 4.33431e-11 | 1.000000 |
| rad22                         | 3.74687e-11 | 1.000000 | 3.74687e-11 | 1.000000 |
| PAH10+CH3                     | 3.53206e-11 | 1.000000 | 3.53206e-11 | 1.000000 |
| rad36                         | 3.07155e-11 | 1.000000 | 3.07155e-11 | 1.000000 |
| PAH3+H                        | 2.79494e-11 | 1.000000 | 2.79494e-11 | 1.000000 |
| rad60anti                     | 2.18756e-11 | 1.000000 | 2.18756e-11 | 1.000000 |
| rad13                         | 1.80398e-11 | 1.000000 | 1.80398e-11 | 1.000000 |
| rad46                         | 7.30596e-12 | 1.000000 | 7.30596e-12 | 1.000000 |
| rad59                         | 5.35792e-12 | 1.000000 | 5.35792e-12 | 1.000000 |
| rad43                         | 1.41293e-12 | 1.000000 | 1.41293e-12 | 1.000000 |
| Phenyl+cycC3H4                | 1.23952e-12 | 1.000000 | 0.000000    | 1.000000 |
| PhcycC3H3_B+H                 | 1.08405e-12 | 1.000000 | 1.08405e-12 | 1.000000 |
| rad14                         | 7.11375e-13 | 1.000000 | 7.11375e-13 | 1.000000 |
| rad27                         | 6.25527e-13 | 1.000000 | 6.25527e-13 | 1.000000 |
| rad62                         | 2.51652e-13 | 1.000000 | 2.51652e-13 | 1.000000 |
| rad5                          | 1.51985e-13 | 1.000000 | 1.51985e-13 | 1.000000 |
| rad54                         | 1.37790e-13 | 1.000000 | 1.37790e-13 | 1.000000 |
| rad50                         | 9.71178e-14 | 1.000000 | 9.71178e-14 | 1.000000 |
| rad33                         | 2.15002e-14 | 1.000000 | 2.15002e-14 | 1.000000 |
| rad25                         | 1.82397e-14 | 1.000000 | 1.82397e-14 | 1.000000 |
| rad70                         | 1.38978e-14 | 1.000000 | 1.38978e-14 | 1.000000 |
| PAH1+H                        | 1.20176e-14 | 1.000000 | 1.20176e-14 | 1.000000 |
| rad18                         | 1.06124e-14 | 1.000000 | 1.06124e-14 | 1.000000 |
| rad55                         | 2.12801e-15 | 1.000000 | 2.12801e-15 | 1.000000 |
| rad58                         | 1.97171e-15 | 1.000000 | 1.97171e-15 | 1.000000 |
| rad20                         | 1.21594e-15 | 1.000000 | 1.21594e-15 | 1.000000 |
| rad52                         | 1.07421e-15 | 1.000000 | 1.07421e-15 | 1.000000 |
| rad21                         | 7.53952e-16 | 1.000000 | 7.53952e-16 | 1.000000 |
| rad51                         | 5.14347e-16 | 1.000000 | 5.14347e-16 | 1.000000 |
| rad34                         | 4.47897e-16 | 1.000000 | 4.47897e-16 | 1.000000 |
| rad41                         | 4.41054e-16 | 1.000000 | 4.41054e-16 | 1.000000 |
| rad42                         | 2.01671e-16 | 1.000000 | 2.01671e-16 | 1.000000 |
| rad31                         | 2.10291e-17 | 1.000000 | 2.10291e-17 | 1.000000 |
| rad65                         | 1.35912e-17 | 1.000000 | 1.35912e-17 | 1.000000 |
| rad24                         | 4.44020e-18 | 1.000000 | 4.44020e-18 | 1.000000 |
| rad53                         | 1.03797e-18 | 1.000000 | 1.03797e-18 | 1.000000 |
| rad61                         | 7.37197e-19 | 1.000000 | 7.37197e-19 | 1.000000 |
| rad64                         | 2.75586e-19 | 1.000000 | 2.75586e-19 | 1.000000 |
| rad56                         | 1.29103e-20 | 1.000000 | 1.29103e-20 | 1.000000 |
| rad68syn                      | 3.31154e-21 | 1.000000 | 3.31154e-21 | 1.000000 |
| rad68anti                     | 2.45951e-21 | 1.000000 | 2.45951e-21 | 1.000000 |
| rad40syn                      | 1.31935e-22 | 1.000000 | 1.31935e-22 | 1.000000 |
| rad40anti                     | 1.13261e-22 | 1.000000 | 1.13261e-22 | 1.000000 |
| PAH8+H                        | 2.38751e-23 | 1.000000 | 2.38751e-23 | 1.000000 |
| rad47                         | 5.00923e-24 | 1.000000 | 5.00923e-24 | 1.000000 |
| rad73                         | 3.13034e-24 | 1.000000 | 3.13034e-24 | 1.000000 |
| rad71                         | 3.51085e-26 | 1.000000 | 3.51085e-26 | 1.000000 |

|          |             |          |             |          |
|----------|-------------|----------|-------------|----------|
| rad19syn | 1.76246e-29 | 1.000000 | 1.76246e-29 | 1.000000 |
| rad8     | 1.26647e-49 | 1.000000 | 1.26647e-49 | 1.000000 |

100.000000 Pa, 260.000000 K

=====

| Rate constant             | True (fraction)        | Effective (fraction)   |
|---------------------------|------------------------|------------------------|
| Total                     | 2.97464e-14 (1.00 )    | 2.97464e-14 (1.00 )    |
| Formation of rad19        | 2.97293e-14 (0.999 )   | 2.97293e-14 (0.999 )   |
| H-abstraction to cyc2enyl | 1.70236e-17 (0.000572) | 1.70236e-17 (0.000572) |
| H-abstraction to cyc1enyl | 3.02186e-20 (1.02e-06) | 3.02186e-20 (1.02e-06) |

| species                       | PYtrue      | Cumul    | PYeffective | Cumul    |
|-------------------------------|-------------|----------|-------------|----------|
| Indene+H                      | 0.972048    | 0.972048 | 0.972048    | 0.972048 |
| rad9                          | 0.0269622   | 0.999011 | 0.0269622   | 0.999011 |
| Benzene+cycloprop-2-enylidene | 0.000572291 | 0.999583 | 0.000572291 | 0.999583 |
| PhCCH2+H                      | 0.000356244 | 0.999939 | 0.000356244 | 0.999939 |
| rad15                         | 2.70446e-05 | 0.999966 | 2.70446e-05 | 0.999966 |
| rad6                          | 1.70836e-05 | 0.999983 | 1.70836e-05 | 0.999983 |
| PhCCH+CH3                     | 4.73297e-06 | 0.999988 | 4.73297e-06 | 0.999988 |
| PhCCCH3+H                     | 3.47826e-06 | 0.999992 | 3.47826e-06 | 0.999992 |
| Ph+MeAc                       | 2.96652e-06 | 0.999994 | 2.96652e-06 | 0.999994 |
| C2H2+PhCH2                    | 2.38331e-06 | 0.999997 | 2.38331e-06 | 0.999997 |
| Benzene+cycloprop-1-enylidene | 1.01588e-06 | 0.999998 | 1.01588e-06 | 0.999998 |
| rad67                         | 9.93395e-07 | 0.999999 | 9.93395e-07 | 0.999999 |
| rad35                         | 4.23639e-07 | 0.999999 | 4.23639e-07 | 0.999999 |
| rad2                          | 4.10229e-07 | 1.000000 | 4.10229e-07 | 1.000000 |
| rad26                         | 3.55543e-07 | 1.000000 | 3.55543e-07 | 1.000000 |
| Ph+Allene                     | 7.44933e-08 | 1.000000 | 7.44933e-08 | 1.000000 |
| rad10                         | 3.95597e-08 | 1.000000 | 3.95597e-08 | 1.000000 |
| rad1                          | 2.95556e-08 | 1.000000 | 2.95556e-08 | 1.000000 |
| rad28                         | 2.01858e-08 | 1.000000 | 2.01858e-08 | 1.000000 |
| PhCH2CCH+H                    | 1.48117e-08 | 1.000000 | 1.48117e-08 | 1.000000 |
| rad37                         | 9.84342e-09 | 1.000000 | 9.84342e-09 | 1.000000 |
| rad30                         | 7.65011e-09 | 1.000000 | 7.65011e-09 | 1.000000 |
| rad23                         | 7.16361e-09 | 1.000000 | 7.16361e-09 | 1.000000 |
| rad7                          | 5.74031e-09 | 1.000000 | 5.74031e-09 | 1.000000 |
| rad3                          | 4.56021e-09 | 1.000000 | 4.56021e-09 | 1.000000 |
| PAH7+H                        | 2.71890e-09 | 1.000000 | 2.71890e-09 | 1.000000 |
| rad4                          | 2.38513e-09 | 1.000000 | 2.38513e-09 | 1.000000 |
| rad11                         | 2.31936e-09 | 1.000000 | 2.31936e-09 | 1.000000 |
| rad39                         | 7.47735e-10 | 1.000000 | 7.47735e-10 | 1.000000 |
| rad45                         | 4.68606e-10 | 1.000000 | 4.68606e-10 | 1.000000 |
| PAH9+H                        | 2.73612e-10 | 1.000000 | 2.73612e-10 | 1.000000 |
| rad12                         | 1.61634e-10 | 1.000000 | 1.61634e-10 | 1.000000 |
| rad38                         | 1.57875e-10 | 1.000000 | 1.57875e-10 | 1.000000 |
| PhcycC3H3_A+H                 | 9.68630e-11 | 1.000000 | 9.68630e-11 | 1.000000 |
| rad60syn                      | 4.92804e-11 | 1.000000 | 4.92804e-11 | 1.000000 |
| rad19anti                     | 4.75336e-11 | 1.000000 | 4.75336e-11 | 1.000000 |
| PAH10+CH3                     | 4.61099e-11 | 1.000000 | 4.61099e-11 | 1.000000 |
| rad22                         | 3.78023e-11 | 1.000000 | 3.78023e-11 | 1.000000 |
| PAH3+H                        | 3.31743e-11 | 1.000000 | 3.31743e-11 | 1.000000 |
| rad36                         | 2.98939e-11 | 1.000000 | 2.98939e-11 | 1.000000 |
| rad60anti                     | 2.49481e-11 | 1.000000 | 2.49481e-11 | 1.000000 |
| rad13                         | 1.89652e-11 | 1.000000 | 1.89652e-11 | 1.000000 |
| rad46                         | 8.67003e-12 | 1.000000 | 8.67003e-12 | 1.000000 |
| rad59                         | 6.31362e-12 | 1.000000 | 6.31362e-12 | 1.000000 |
| Phenyl+cycC3H4                | 1.79997e-12 | 1.000000 | 0.000000    | 1.000000 |
| rad43                         | 1.74991e-12 | 1.000000 | 1.74991e-12 | 1.000000 |
| PhcycC3H3_B+H                 | 1.71475e-12 | 1.000000 | 1.71475e-12 | 1.000000 |
| rad14                         | 6.43790e-13 | 1.000000 | 6.43790e-13 | 1.000000 |
| rad27                         | 5.65021e-13 | 1.000000 | 5.65021e-13 | 1.000000 |
| rad62                         | 3.11226e-13 | 1.000000 | 3.11226e-13 | 1.000000 |
| rad54                         | 2.00201e-13 | 1.000000 | 2.00201e-13 | 1.000000 |
| rad5                          | 1.28732e-13 | 1.000000 | 1.28732e-13 | 1.000000 |
| rad50                         | 1.23419e-13 | 1.000000 | 1.23419e-13 | 1.000000 |
| rad33                         | 2.26978e-14 | 1.000000 | 2.26978e-14 | 1.000000 |
| rad70                         | 1.93766e-14 | 1.000000 | 1.93766e-14 | 1.000000 |
| rad25                         | 1.90874e-14 | 1.000000 | 1.90874e-14 | 1.000000 |
| PAH1+H                        | 1.77262e-14 | 1.000000 | 1.77262e-14 | 1.000000 |
| rad18                         | 1.06400e-14 | 1.000000 | 1.06400e-14 | 1.000000 |
| rad55                         | 3.26151e-15 | 1.000000 | 3.26151e-15 | 1.000000 |
| rad58                         | 2.65300e-15 | 1.000000 | 2.65300e-15 | 1.000000 |
| rad52                         | 1.42999e-15 | 1.000000 | 1.42999e-15 | 1.000000 |
| rad20                         | 1.23127e-15 | 1.000000 | 1.23127e-15 | 1.000000 |
| rad21                         | 7.63713e-16 | 1.000000 | 7.63713e-16 | 1.000000 |
| rad51                         | 7.19466e-16 | 1.000000 | 7.19466e-16 | 1.000000 |
| rad34                         | 6.65165e-16 | 1.000000 | 6.65165e-16 | 1.000000 |
| rad41                         | 6.38494e-16 | 1.000000 | 6.38494e-16 | 1.000000 |

|           |             |         |             |         |
|-----------|-------------|---------|-------------|---------|
| rad42     | 2.84406e-16 | 1.00000 | 2.84406e-16 | 1.00000 |
| rad31     | 2.10546e-17 | 1.00000 | 2.10546e-17 | 1.00000 |
| rad65     | 1.93197e-17 | 1.00000 | 1.93197e-17 | 1.00000 |
| rad24     | 4.33630e-18 | 1.00000 | 4.33630e-18 | 1.00000 |
| rad53     | 2.00070e-18 | 1.00000 | 2.00070e-18 | 1.00000 |
| rad61     | 1.48564e-18 | 1.00000 | 1.48564e-18 | 1.00000 |
| rad64     | 5.68042e-19 | 1.00000 | 5.68042e-19 | 1.00000 |
| rad56     | 3.01643e-20 | 1.00000 | 3.01643e-20 | 1.00000 |
| rad68syn  | 7.40606e-21 | 1.00000 | 7.40606e-21 | 1.00000 |
| rad68anti | 5.47127e-21 | 1.00000 | 5.47127e-21 | 1.00000 |
| rad40syn  | 3.32923e-22 | 1.00000 | 3.32923e-22 | 1.00000 |
| rad40anti | 2.85595e-22 | 1.00000 | 2.85595e-22 | 1.00000 |
| PAH8+H    | 6.79927e-23 | 1.00000 | 6.79927e-23 | 1.00000 |
| rad73     | 8.20813e-24 | 1.00000 | 8.20813e-24 | 1.00000 |
| rad47     | 5.79270e-24 | 1.00000 | 5.79270e-24 | 1.00000 |
| rad71     | 1.06646e-25 | 1.00000 | 1.06646e-25 | 1.00000 |
| rad19syn  | 7.46211e-29 | 1.00000 | 7.46211e-29 | 1.00000 |
| rad8      | 1.91266e-49 | 1.00000 | 1.91266e-49 | 1.00000 |

100.000000 Pa, 270.000000 K

| Rate constant             | True (fraction)        | Effective (fraction)   |
|---------------------------|------------------------|------------------------|
| Total                     | 3.24655e-14 (1.00 )    | 3.24655e-14 (1.00 )    |
| Formation of rad19        | 3.24415e-14 (0.999 )   | 3.24415e-14 (0.999 )   |
| H-abstraction to cyc2enyl | 2.38790e-17 (0.000736) | 2.38790e-17 (0.000736) |
| H-abstraction to cyclenyl | 5.45397e-20 (1.68e-06) | 5.45397e-20 (1.68e-06) |

| species                       | PYtrue      | Cumul    | PYeffective | Cumul    |
|-------------------------------|-------------|----------|-------------|----------|
| Indene+H                      | 0.975840    | 0.975840 | 0.975840    | 0.975840 |
| rad9                          | 0.0229824   | 0.998823 | 0.0229824   | 0.998823 |
| Benzene+cycloprop-2-enylidene | 0.000735519 | 0.999558 | 0.000735519 | 0.999558 |
| PhCHCCH2+H                    | 0.000382286 | 0.999940 | 0.000382286 | 0.999940 |
| rad15                         | 2.29547e-05 | 0.999963 | 2.29547e-05 | 0.999963 |
| rad6                          | 1.80723e-05 | 0.999981 | 1.80723e-05 | 0.999981 |
| PhCCH+CH3                     | 5.13156e-06 | 0.999986 | 5.13156e-06 | 0.999986 |
| PhCCCH3+H                     | 3.80841e-06 | 0.999990 | 3.80841e-06 | 0.999990 |
| Ph+MeAc                       | 3.30664e-06 | 0.999994 | 3.30664e-06 | 0.999994 |
| C2H2+PhCH2                    | 2.65350e-06 | 0.999996 | 2.65350e-06 | 0.999996 |
| Benzene+cycloprop-1-enylidene | 1.67993e-06 | 0.999998 | 1.67993e-06 | 0.999998 |
| rad67                         | 1.09068e-06 | 0.999999 | 1.09068e-06 | 0.999999 |
| rad35                         | 4.63585e-07 | 0.999999 | 4.63585e-07 | 0.999999 |
| rad2                          | 3.71874e-07 | 1.000000 | 3.71874e-07 | 1.000000 |
| rad26                         | 3.28789e-07 | 1.000000 | 3.28789e-07 | 1.000000 |
| Ph+Allene                     | 9.07092e-08 | 1.000000 | 9.07092e-08 | 1.000000 |
| rad10                         | 3.58010e-08 | 1.000000 | 3.58010e-08 | 1.000000 |
| rad1                          | 2.71485e-08 | 1.000000 | 2.71485e-08 | 1.000000 |
| rad28                         | 2.22742e-08 | 1.000000 | 2.22742e-08 | 1.000000 |
| PhCH2CCH+H                    | 1.81941e-08 | 1.000000 | 1.81941e-08 | 1.000000 |
| rad37                         | 1.14290e-08 | 1.000000 | 1.14290e-08 | 1.000000 |
| rad30                         | 8.41149e-09 | 1.000000 | 8.41149e-09 | 1.000000 |
| rad23                         | 7.04083e-09 | 1.000000 | 7.04083e-09 | 1.000000 |
| rad7                          | 6.03307e-09 | 1.000000 | 6.03307e-09 | 1.000000 |
| rad3                          | 4.13880e-09 | 1.000000 | 4.13880e-09 | 1.000000 |
| PAH7+H                        | 3.61968e-09 | 1.000000 | 3.61968e-09 | 1.000000 |
| rad11                         | 2.43205e-09 | 1.000000 | 2.43205e-09 | 1.000000 |
| rad4                          | 2.17281e-09 | 1.000000 | 2.17281e-09 | 1.000000 |
| rad39                         | 9.97141e-10 | 1.000000 | 9.97141e-10 | 1.000000 |
| rad45                         | 4.58054e-10 | 1.000000 | 4.58054e-10 | 1.000000 |
| PAH9+H                        | 3.18354e-10 | 1.000000 | 3.18354e-10 | 1.000000 |
| rad38                         | 1.88000e-10 | 1.000000 | 1.88000e-10 | 1.000000 |
| rad12                         | 1.39849e-10 | 1.000000 | 1.39849e-10 | 1.000000 |
| PhcycC3H3_A+H                 | 1.29498e-10 | 1.000000 | 1.29498e-10 | 1.000000 |
| PAH10+CH3                     | 6.00679e-11 | 1.000000 | 6.00679e-11 | 1.000000 |
| rad60syn                      | 5.61535e-11 | 1.000000 | 5.61535e-11 | 1.000000 |
| rad19anti                     | 4.14581e-11 | 1.000000 | 4.14581e-11 | 1.000000 |
| PAH3+H                        | 3.94923e-11 | 1.000000 | 3.94923e-11 | 1.000000 |
| rad22                         | 3.82692e-11 | 1.000000 | 3.82692e-11 | 1.000000 |
| rad36                         | 2.94095e-11 | 1.000000 | 2.94095e-11 | 1.000000 |
| rad60anti                     | 2.85160e-11 | 1.000000 | 2.85160e-11 | 1.000000 |
| rad13                         | 1.99248e-11 | 1.000000 | 1.99248e-11 | 1.000000 |
| rad46                         | 1.03305e-11 | 1.000000 | 1.03305e-11 | 1.000000 |
| rad59                         | 7.46038e-12 | 1.000000 | 7.46038e-12 | 1.000000 |
| PhcycC3H3_B+H                 | 2.67871e-12 | 1.000000 | 2.67871e-12 | 1.000000 |
| Phenyl+cycC3H4                | 2.60320e-12 | 1.000000 | 0.000000    | 1.000000 |
| rad43                         | 2.16669e-12 | 1.000000 | 2.16669e-12 | 1.000000 |
| rad14                         | 5.81987e-13 | 1.000000 | 5.81987e-13 | 1.000000 |
| rad27                         | 5.09507e-13 | 1.000000 | 5.09507e-13 | 1.000000 |
| rad62                         | 3.84749e-13 | 1.000000 | 3.84749e-13 | 1.000000 |

|           |             |         |             |         |
|-----------|-------------|---------|-------------|---------|
| rad54     | 2.90841e-13 | 1.00000 | 2.90841e-13 | 1.00000 |
| rad50     | 1.57627e-13 | 1.00000 | 1.57627e-13 | 1.00000 |
| rad5      | 1.09097e-13 | 1.00000 | 1.09097e-13 | 1.00000 |
| rad70     | 2.71234e-14 | 1.00000 | 2.71234e-14 | 1.00000 |
| PAH1+H    | 2.60355e-14 | 1.00000 | 2.60355e-14 | 1.00000 |
| rad33     | 2.39520e-14 | 1.00000 | 2.39520e-14 | 1.00000 |
| rad25     | 1.99670e-14 | 1.00000 | 1.99670e-14 | 1.00000 |
| rad18     | 1.06881e-14 | 1.00000 | 1.06881e-14 | 1.00000 |
| rad55     | 4.98640e-15 | 1.00000 | 4.98640e-15 | 1.00000 |
| rad58     | 3.57508e-15 | 1.00000 | 3.57508e-15 | 1.00000 |
| rad52     | 1.91280e-15 | 1.00000 | 1.91280e-15 | 1.00000 |
| rad20     | 1.25076e-15 | 1.00000 | 1.25076e-15 | 1.00000 |
| rad51     | 1.01042e-15 | 1.00000 | 1.01042e-15 | 1.00000 |
| rad34     | 9.89143e-16 | 1.00000 | 9.89143e-16 | 1.00000 |
| rad41     | 9.18887e-16 | 1.00000 | 9.18887e-16 | 1.00000 |
| rad21     | 7.76108e-16 | 1.00000 | 7.76108e-16 | 1.00000 |
| rad42     | 3.99117e-16 | 1.00000 | 3.99117e-16 | 1.00000 |
| rad65     | 2.75441e-17 | 1.00000 | 2.75441e-17 | 1.00000 |
| rad31     | 2.12276e-17 | 1.00000 | 2.12276e-17 | 1.00000 |
| rad24     | 4.28171e-18 | 1.00000 | 4.28171e-18 | 1.00000 |
| rad53     | 3.77719e-18 | 1.00000 | 3.77719e-18 | 1.00000 |
| rad61     | 2.89431e-18 | 1.00000 | 2.89431e-18 | 1.00000 |
| rad64     | 1.13575e-18 | 1.00000 | 1.13575e-18 | 1.00000 |
| rad56     | 6.74013e-20 | 1.00000 | 6.74013e-20 | 1.00000 |
| rad68syn  | 1.59043e-20 | 1.00000 | 1.59043e-20 | 1.00000 |
| rad68anti | 1.16940e-20 | 1.00000 | 1.16940e-20 | 1.00000 |
| rad40syn  | 7.90128e-22 | 1.00000 | 7.90128e-22 | 1.00000 |
| rad40anti | 6.77053e-22 | 1.00000 | 6.77053e-22 | 1.00000 |
| PAH8+H    | 1.79095e-22 | 1.00000 | 1.79095e-22 | 1.00000 |
| rad73     | 2.02272e-23 | 1.00000 | 2.02272e-23 | 1.00000 |
| rad47     | 6.82682e-24 | 1.00000 | 6.82682e-24 | 1.00000 |
| rad71     | 2.97173e-25 | 1.00000 | 2.97173e-25 | 1.00000 |
| rad19syn  | 3.27891e-28 | 1.00000 | 3.27891e-28 | 1.00000 |
| rad8      | 2.94123e-49 | 1.00000 | 2.94123e-49 | 1.00000 |

100.000000 Pa, 280.000000 K

=====

| Rate constant             | True (fraction)        | Effective (fraction)   |
|---------------------------|------------------------|------------------------|
| Total                     | 3.52572e-14 (1.00 )    | 3.52572e-14 (1.00 )    |
| Formation of rad19        | 3.52244e-14 (0.999 )   | 3.52244e-14 (0.999 )   |
| H-abstraction to cyc2enyl | 3.26639e-17 (0.000926) | 3.26639e-17 (0.000926) |
| H-abstraction to cyc1enyl | 9.42926e-20 (2.67e-06) | 9.42926e-20 (2.67e-06) |

| species                       | PYtrue      | Cumul    | PYeffective | Cumul    |
|-------------------------------|-------------|----------|-------------|----------|
| Indene+H                      | 0.979046    | 0.979046 | 0.979046    | 0.979046 |
| rad9                          | 0.0195576   | 0.998603 | 0.0195576   | 0.998603 |
| Benzene+cycloprop-2-enylidene | 0.000926445 | 0.999530 | 0.000926445 | 0.999530 |
| PhCHCCH2+H                    | 0.000410478 | 0.999940 | 0.000410478 | 0.999940 |
| rad15                         | 1.94550e-05 | 0.999959 | 1.94550e-05 | 0.999959 |
| rad6                          | 1.90927e-05 | 0.999979 | 1.90927e-05 | 0.999979 |
| PhCCH+CH3                     | 5.56138e-06 | 0.999984 | 5.56138e-06 | 0.999984 |
| PhCCCH3+H                     | 4.16812e-06 | 0.999988 | 4.16812e-06 | 0.999988 |
| Ph+MeAc                       | 3.68466e-06 | 0.999992 | 3.68466e-06 | 0.999992 |
| C2H2+PhCH2                    | 2.96174e-06 | 0.999995 | 2.96174e-06 | 0.999995 |
| Benzene+cycloprop-1-enylidene | 2.67442e-06 | 0.999998 | 2.67442e-06 | 0.999998 |
| rad67                         | 1.19861e-06 | 0.999999 | 1.19861e-06 | 0.999999 |
| rad35                         | 5.07759e-07 | 0.999999 | 5.07759e-07 | 0.999999 |
| rad2                          | 3.36473e-07 | 1.000000 | 3.36473e-07 | 1.000000 |
| rad26                         | 3.02198e-07 | 1.000000 | 3.02198e-07 | 1.000000 |
| Ph+Allene                     | 1.10974e-07 | 1.000000 | 1.10974e-07 | 1.000000 |
| rad10                         | 3.23418e-08 | 1.000000 | 3.23418e-08 | 1.000000 |
| rad1                          | 2.49147e-08 | 1.000000 | 2.49147e-08 | 1.000000 |
| rad28                         | 2.44540e-08 | 1.000000 | 2.44540e-08 | 1.000000 |
| PhCH2CCH+H                    | 2.24504e-08 | 1.000000 | 2.24504e-08 | 1.000000 |
| rad37                         | 1.32479e-08 | 1.000000 | 1.32479e-08 | 1.000000 |
| rad30                         | 9.26088e-09 | 1.000000 | 9.26088e-09 | 1.000000 |
| rad23                         | 6.97860e-09 | 1.000000 | 6.97860e-09 | 1.000000 |
| rad7                          | 6.33430e-09 | 1.000000 | 6.33430e-09 | 1.000000 |
| PAH7+H                        | 4.79926e-09 | 1.000000 | 4.79926e-09 | 1.000000 |
| rad3                          | 3.75232e-09 | 1.000000 | 3.75232e-09 | 1.000000 |
| rad11                         | 2.54792e-09 | 1.000000 | 2.54792e-09 | 1.000000 |
| rad4                          | 1.97784e-09 | 1.000000 | 1.97784e-09 | 1.000000 |
| rad39                         | 1.32369e-09 | 1.000000 | 1.32369e-09 | 1.000000 |
| rad45                         | 4.51844e-10 | 1.000000 | 4.51844e-10 | 1.000000 |
| PAH9+H                        | 3.71687e-10 | 1.000000 | 3.71687e-10 | 1.000000 |
| rad38                         | 2.24394e-10 | 1.000000 | 2.24394e-10 | 1.000000 |
| PhcycC3H3_A+H                 | 1.72961e-10 | 1.000000 | 1.72961e-10 | 1.000000 |
| rad12                         | 1.20941e-10 | 1.000000 | 1.20941e-10 | 1.000000 |

|                |             |         |             |         |
|----------------|-------------|---------|-------------|---------|
| PAH10+CH3      | 7.80616e-11 | 1.00000 | 7.80616e-11 | 1.00000 |
| rad60syn       | 6.41165e-11 | 1.00000 | 6.41165e-11 | 1.00000 |
| PAH3+H         | 4.71384e-11 | 1.00000 | 4.71384e-11 | 1.00000 |
| rad22          | 3.88442e-11 | 1.00000 | 3.88442e-11 | 1.00000 |
| rad19anti      | 3.62310e-11 | 1.00000 | 3.62310e-11 | 1.00000 |
| rad60anti      | 3.26626e-11 | 1.00000 | 3.26626e-11 | 1.00000 |
| rad36          | 2.92165e-11 | 1.00000 | 2.92165e-11 | 1.00000 |
| rad13          | 2.09150e-11 | 1.00000 | 2.09150e-11 | 1.00000 |
| rad46          | 1.23569e-11 | 1.00000 | 1.23569e-11 | 1.00000 |
| rad59          | 8.83740e-12 | 1.00000 | 8.83740e-12 | 1.00000 |
| PhcycC3H3_B+H  | 4.13370e-12 | 1.00000 | 4.13370e-12 | 1.00000 |
| Phenyl+cycC3H4 | 3.74742e-12 | 1.00000 | 0.00000     | 1.00000 |
| rad43          | 2.68139e-12 | 1.00000 | 2.68139e-12 | 1.00000 |
| rad14          | 5.25747e-13 | 1.00000 | 5.25747e-13 | 1.00000 |
| rad62          | 4.75363e-13 | 1.00000 | 4.75363e-13 | 1.00000 |
| rad27          | 4.58817e-13 | 1.00000 | 4.58817e-13 | 1.00000 |
| rad54          | 4.21845e-13 | 1.00000 | 4.21845e-13 | 1.00000 |
| rad50          | 2.02216e-13 | 1.00000 | 2.02216e-13 | 1.00000 |
| rad5           | 9.25112e-14 | 1.00000 | 9.25112e-14 | 1.00000 |
| rad70          | 3.80682e-14 | 1.00000 | 3.80682e-14 | 1.00000 |
| PAH1+H         | 3.80570e-14 | 1.00000 | 3.80570e-14 | 1.00000 |
| rad33          | 2.52603e-14 | 1.00000 | 2.52603e-14 | 1.00000 |
| rad25          | 2.08751e-14 | 1.00000 | 2.08751e-14 | 1.00000 |
| rad18          | 1.07535e-14 | 1.00000 | 1.07535e-14 | 1.00000 |
| rad55          | 7.59202e-15 | 1.00000 | 7.59202e-15 | 1.00000 |
| rad58          | 4.82080e-15 | 1.00000 | 4.82080e-15 | 1.00000 |
| rad52          | 2.56889e-15 | 1.00000 | 2.56889e-15 | 1.00000 |
| rad34          | 1.47050e-15 | 1.00000 | 1.47050e-15 | 1.00000 |
| rad51          | 1.42309e-15 | 1.00000 | 1.42309e-15 | 1.00000 |
| rad41          | 1.31417e-15 | 1.00000 | 1.31417e-15 | 1.00000 |
| rad20          | 1.27416e-15 | 1.00000 | 1.27416e-15 | 1.00000 |
| rad21          | 7.90998e-16 | 1.00000 | 7.90998e-16 | 1.00000 |
| rad42          | 5.57218e-16 | 1.00000 | 5.57218e-16 | 1.00000 |
| rad65          | 3.93392e-17 | 1.00000 | 3.93392e-17 | 1.00000 |
| rad31          | 2.15760e-17 | 1.00000 | 2.15760e-17 | 1.00000 |
| rad53          | 6.97585e-18 | 1.00000 | 6.97585e-18 | 1.00000 |
| rad61          | 5.45909e-18 | 1.00000 | 5.45909e-18 | 1.00000 |
| rad24          | 4.27024e-18 | 1.00000 | 4.27024e-18 | 1.00000 |
| rad64          | 2.20235e-18 | 1.00000 | 2.20235e-18 | 1.00000 |
| rad56          | 1.44157e-19 | 1.00000 | 1.44157e-19 | 1.00000 |
| rad68syn       | 3.28290e-20 | 1.00000 | 3.28290e-20 | 1.00000 |
| rad68anti      | 2.40382e-20 | 1.00000 | 2.40382e-20 | 1.00000 |
| rad40syn       | 1.77087e-21 | 1.00000 | 1.77087e-21 | 1.00000 |
| rad40anti      | 1.51534e-21 | 1.00000 | 1.51534e-21 | 1.00000 |
| PAH8+H         | 4.38995e-22 | 1.00000 | 4.38995e-22 | 1.00000 |
| rad73          | 4.69911e-23 | 1.00000 | 4.69911e-23 | 1.00000 |
| rad47          | 8.21060e-24 | 1.00000 | 8.21060e-24 | 1.00000 |
| rad71          | 7.65104e-25 | 1.00000 | 7.65104e-25 | 1.00000 |
| rad19syn       | 1.48927e-27 | 1.00000 | 1.48927e-27 | 1.00000 |
| rad8           | 4.60818e-49 | 1.00000 | 4.60818e-49 | 1.00000 |

100.000000 Pa, 290.000000 K

=====

| Rate constant             | True (fraction)        | Effective (fraction)   |
|---------------------------|------------------------|------------------------|
| Total                     | 3.81171e-14 (1.00 )    | 3.81171e-14 (1.00 )    |
| Formation of rad19        | 3.80733e-14 (0.999 )   | 3.80733e-14 (0.999 )   |
| H-abstraction to cyc2enyl | 4.36868e-17 (0.00115 ) | 4.36868e-17 (0.00115 ) |
| H-abstraction to cyclenyl | 1.56861e-19 (4.12e-06) | 1.56861e-19 (4.12e-06) |

| species                       | PYtrue      | Cumul    | PYeffective | Cumul    |
|-------------------------------|-------------|----------|-------------|----------|
| Indene+H                      | 0.981732    | 0.981732 | 0.981732    | 0.981732 |
| rad9                          | 0.0166186   | 0.998351 | 0.0166186   | 0.998351 |
| Benzene+cycloprop-2-enylidene | 0.00114612  | 0.999497 | 0.00114612  | 0.999497 |
| PhCHCCH2+H                    | 0.000441008 | 0.999938 | 0.000441008 | 0.999938 |
| rad6                          | 2.01402e-05 | 0.999958 | 2.01402e-05 | 0.999958 |
| rad15                         | 1.64677e-05 | 0.999975 | 1.64677e-05 | 0.999975 |
| PhCCH+CH3                     | 6.02550e-06 | 0.999981 | 6.02550e-06 | 0.999981 |
| PhCCCH3+H                     | 4.56019e-06 | 0.999985 | 4.56019e-06 | 0.999985 |
| Benzene+cycloprop-1-enylidene | 4.11523e-06 | 0.999989 | 4.11523e-06 | 0.999989 |
| Ph+MeAc                       | 4.10478e-06 | 0.999994 | 4.10478e-06 | 0.999994 |
| C2H2+PhCH2                    | 3.31384e-06 | 0.999997 | 3.31384e-06 | 0.999997 |
| rad67                         | 1.31835e-06 | 0.999998 | 1.31835e-06 | 0.999998 |
| rad35                         | 5.56611e-07 | 0.999999 | 5.56611e-07 | 0.999999 |
| rad2                          | 3.03989e-07 | 0.999999 | 3.03989e-07 | 0.999999 |
| rad26                         | 2.76124e-07 | 0.999999 | 2.76124e-07 | 0.999999 |
| Ph+Allene                     | 1.36314e-07 | 0.999999 | 1.36314e-07 | 0.999999 |
| rad10                         | 2.91759e-08 | 1.000000 | 2.91759e-08 | 1.000000 |
| PhCH2CCH+H                    | 2.78107e-08 | 1.000000 | 2.78107e-08 | 1.000000 |



|                |             |          |             |          |
|----------------|-------------|----------|-------------|----------|
| rad28          | 2.67085e-08 | 1.000000 | 2.67085e-08 | 1.000000 |
| rad1           | 2.28537e-08 | 1.000000 | 2.28537e-08 | 1.000000 |
| rad37          | 1.53316e-08 | 1.000000 | 1.53316e-08 | 1.000000 |
| rad30          | 1.02089e-08 | 1.000000 | 1.02089e-08 | 1.000000 |
| rad23          | 6.96728e-09 | 1.000000 | 6.96728e-09 | 1.000000 |
| rad7           | 6.64237e-09 | 1.000000 | 6.64237e-09 | 1.000000 |
| PAH7+H         | 6.33377e-09 | 1.000000 | 6.33377e-09 | 1.000000 |
| rad3           | 3.39992e-09 | 1.000000 | 3.39992e-09 | 1.000000 |
| rad11          | 2.66633e-09 | 1.000000 | 2.66633e-09 | 1.000000 |
| rad4           | 1.79985e-09 | 1.000000 | 1.79985e-09 | 1.000000 |
| rad39          | 1.74831e-09 | 1.000000 | 1.74831e-09 | 1.000000 |
| rad45          | 4.49297e-10 | 1.000000 | 4.49297e-10 | 1.000000 |
| PAH9+H         | 4.35384e-10 | 1.000000 | 4.35384e-10 | 1.000000 |
| rad38          | 2.68367e-10 | 1.000000 | 2.68367e-10 | 1.000000 |
| PhcycC3H3_A+H  | 2.30617e-10 | 1.000000 | 2.30617e-10 | 1.000000 |
| rad12          | 1.04565e-10 | 1.000000 | 1.04565e-10 | 1.000000 |
| PAH10+CH3      | 1.01168e-10 | 1.000000 | 1.01168e-10 | 1.000000 |
| rad60syn       | 7.33463e-11 | 1.000000 | 7.33463e-11 | 1.000000 |
| PAH3+H         | 5.63943e-11 | 1.000000 | 5.63943e-11 | 1.000000 |
| rad22          | 3.95038e-11 | 1.000000 | 3.95038e-11 | 1.000000 |
| rad60anti      | 3.74841e-11 | 1.000000 | 3.74841e-11 | 1.000000 |
| rad19anti      | 3.17315e-11 | 1.000000 | 3.17315e-11 | 1.000000 |
| rad36          | 2.92765e-11 | 1.000000 | 2.92765e-11 | 1.000000 |
| rad13          | 2.19310e-11 | 1.000000 | 2.19310e-11 | 1.000000 |
| rad46          | 1.48346e-11 | 1.000000 | 1.48346e-11 | 1.000000 |
| rad59          | 1.04913e-11 | 1.000000 | 1.04913e-11 | 1.000000 |
| PhcycC3H3_B+H  | 6.30125e-12 | 1.000000 | 6.30125e-12 | 1.000000 |
| Phenyl+cycC3H4 | 5.36584e-12 | 1.000000 | 0.00000     | 1.000000 |
| rad43          | 3.31566e-12 | 1.000000 | 3.31566e-12 | 1.000000 |
| rad54          | 6.09957e-13 | 1.000000 | 6.09957e-13 | 1.000000 |
| rad62          | 5.86861e-13 | 1.000000 | 5.86861e-13 | 1.000000 |
| rad14          | 4.74821e-13 | 1.000000 | 4.74821e-13 | 1.000000 |
| rad27          | 4.12754e-13 | 1.000000 | 4.12754e-13 | 1.000000 |
| rad50          | 2.60407e-13 | 1.000000 | 2.60407e-13 | 1.000000 |
| rad5           | 7.85048e-14 | 1.000000 | 7.85048e-14 | 1.000000 |
| PAH1+H         | 5.53270e-14 | 1.000000 | 5.53270e-14 | 1.000000 |
| rad70          | 5.34899e-14 | 1.000000 | 5.34899e-14 | 1.000000 |
| rad33          | 2.66188e-14 | 1.000000 | 2.66188e-14 | 1.000000 |
| rad25          | 2.18068e-14 | 1.000000 | 2.18068e-14 | 1.000000 |
| rad55          | 1.14918e-14 | 1.000000 | 1.14918e-14 | 1.000000 |
| rad18          | 1.08327e-14 | 1.000000 | 1.08327e-14 | 1.000000 |
| rad58          | 6.49900e-15 | 1.000000 | 6.49900e-15 | 1.000000 |
| rad52          | 3.46043e-15 | 1.000000 | 3.46043e-15 | 1.000000 |
| rad34          | 2.18159e-15 | 1.000000 | 2.18159e-15 | 1.000000 |
| rad51          | 2.00730e-15 | 1.000000 | 2.00730e-15 | 1.000000 |
| rad41          | 1.86698e-15 | 1.000000 | 1.86698e-15 | 1.000000 |
| rad20          | 1.30125e-15 | 1.000000 | 1.30125e-15 | 1.000000 |
| rad21          | 8.08252e-16 | 1.000000 | 8.08252e-16 | 1.000000 |
| rad42          | 7.73717e-16 | 1.000000 | 7.73717e-16 | 1.000000 |
| rad65          | 5.62070e-17 | 1.000000 | 5.62070e-17 | 1.000000 |
| rad31          | 2.21353e-17 | 1.000000 | 2.21353e-17 | 1.000000 |
| rad53          | 1.25861e-17 | 1.000000 | 1.25861e-17 | 1.000000 |
| rad61          | 9.97855e-18 | 1.000000 | 9.97855e-18 | 1.000000 |
| rad24          | 4.29685e-18 | 1.000000 | 4.29685e-18 | 1.000000 |
| rad64          | 4.14069e-18 | 1.000000 | 4.14069e-18 | 1.000000 |
| rad56          | 2.95360e-19 | 1.000000 | 2.95360e-19 | 1.000000 |
| rad68syn       | 6.51816e-20 | 1.000000 | 6.51816e-20 | 1.000000 |
| rad68anti      | 4.75567e-20 | 1.000000 | 4.75567e-20 | 1.000000 |
| rad40syn       | 3.76133e-21 | 1.000000 | 3.76133e-21 | 1.000000 |
| rad40anti      | 3.21358e-21 | 1.000000 | 3.21358e-21 | 1.000000 |
| PAH8+H         | 1.00689e-21 | 1.000000 | 1.00689e-21 | 1.000000 |
| rad73          | 1.03222e-22 | 1.000000 | 1.03222e-22 | 1.000000 |
| rad47          | 1.00900e-23 | 1.000000 | 1.00900e-23 | 1.000000 |
| rad71          | 1.83191e-24 | 1.000000 | 1.83191e-24 | 1.000000 |
| rad19syn       | 6.96036e-27 | 1.000000 | 6.96036e-27 | 1.000000 |
| rad8           | 7.36125e-49 | 1.000000 | 7.36125e-49 | 1.000000 |

100.000000 Pa, 300.000000 K

| Rate constant             | True (fraction)        | Effective (fraction)   |
|---------------------------|------------------------|------------------------|
| Total                     | 5.34809e-14 (1.00 )    | 5.34809e-14 (1.00 )    |
| Formation of rad19        | 5.34010e-14 (0.999 )   | 5.34010e-14 (0.999 )   |
| H-abstraction to cyc2enyl | 7.95823e-17 (0.00149 ) | 7.95823e-17 (0.00149 ) |
| H-abstraction to cyclenyl | 3.44981e-19 (6.45e-06) | 3.44981e-19 (6.45e-06) |

  

| species  | PYtrue    | Cumul    | PYeffective | Cumul    |
|----------|-----------|----------|-------------|----------|
| Indene+H | 0.984247  | 0.984247 | 0.984247    | 0.984247 |
| rad9     | 0.0137288 | 0.997976 | 0.0137288   | 0.997976 |

|                               |             |          |             |          |
|-------------------------------|-------------|----------|-------------|----------|
| Benzene+cycloprop-2-enylidene | 0.00148805  | 0.999464 | 0.00148805  | 0.999464 |
| PhCHCCH2+H                    | 0.000470135 | 0.999934 | 0.000470135 | 0.999934 |
| rad6                          | 2.14180e-05 | 0.999955 | 2.14180e-05 | 0.999955 |
| rad15                         | 1.37785e-05 | 0.999969 | 1.37785e-05 | 0.999969 |
| PhCCH+CH3                     | 7.25328e-06 | 0.999976 | 7.25328e-06 | 0.999976 |
| Benzene+cycloprop-1-enylidene | 6.45054e-06 | 0.999983 | 6.45054e-06 | 0.999983 |
| PhCCCH3+H                     | 5.27813e-06 | 0.999988 | 5.27813e-06 | 0.999988 |
| Ph+MeAc                       | 4.87715e-06 | 0.999993 | 4.87715e-06 | 0.999993 |
| C2H2+PhCH2                    | 4.56972e-06 | 0.999997 | 4.56972e-06 | 0.999997 |
| rad67                         | 1.56593e-06 | 0.999999 | 1.56593e-06 | 0.999999 |
| rad35                         | 6.47655e-07 | 1.000000 | 6.47655e-07 | 1.000000 |
| rad2                          | 2.42835e-07 | 1.000000 | 2.42835e-07 | 1.000000 |
| rad26                         | 2.14672e-07 | 1.000000 | 2.14672e-07 | 1.000000 |
| Ph+Allene                     | 2.08747e-07 | 1.000000 | 2.08747e-07 | 1.000000 |
| PhCH2CCH+H                    | 5.08456e-08 | 1.000000 | 5.08456e-08 | 1.000000 |
| rad28                         | 3.05284e-08 | 1.000000 | 3.05284e-08 | 1.000000 |
| rad37                         | 2.22641e-08 | 1.000000 | 2.22641e-08 | 1.000000 |
| rad10                         | 2.17125e-08 | 1.000000 | 2.17125e-08 | 1.000000 |
| rad1                          | 1.82992e-08 | 1.000000 | 1.82992e-08 | 1.000000 |
| PAH7+H                        | 1.64036e-08 | 1.000000 | 1.64036e-08 | 1.000000 |
| rad30                         | 1.16785e-08 | 1.000000 | 1.16785e-08 | 1.000000 |
| rad23                         | 7.38846e-09 | 1.000000 | 7.38846e-09 | 1.000000 |
| rad7                          | 6.86445e-09 | 1.000000 | 6.86445e-09 | 1.000000 |
| rad39                         | 4.00351e-09 | 1.000000 | 4.00351e-09 | 1.000000 |
| rad3                          | 2.82132e-09 | 1.000000 | 2.82132e-09 | 1.000000 |
| rad11                         | 2.54226e-09 | 1.000000 | 2.54226e-09 | 1.000000 |
| rad4                          | 1.40312e-09 | 1.000000 | 1.40312e-09 | 1.000000 |
| PAH9+H                        | 7.08786e-10 | 1.000000 | 7.08786e-10 | 1.000000 |
| rad45                         | 5.34832e-10 | 1.000000 | 5.34832e-10 | 1.000000 |
| rad38                         | 4.02811e-10 | 1.000000 | 4.02811e-10 | 1.000000 |
| PhcycC3H3_A+H                 | 3.24693e-10 | 1.000000 | 3.24693e-10 | 1.000000 |
| PAH10+CH3                     | 1.97287e-10 | 1.000000 | 1.97287e-10 | 1.000000 |
| rad12                         | 1.46119e-10 | 1.000000 | 1.46119e-10 | 1.000000 |
| rad60syn                      | 9.03262e-11 | 1.000000 | 9.03262e-11 | 1.000000 |
| PAH3+H                        | 8.51592e-11 | 1.000000 | 8.51592e-11 | 1.000000 |
| rad60anti                     | 4.66941e-11 | 1.000000 | 4.66941e-11 | 1.000000 |
| rad22                         | 4.52075e-11 | 1.000000 | 4.52075e-11 | 1.000000 |
| rad19anti                     | 2.75270e-11 | 1.000000 | 2.75270e-11 | 1.000000 |
| rad46                         | 2.33800e-11 | 1.000000 | 2.33800e-11 | 1.000000 |
| rad13                         | 2.33719e-11 | 1.000000 | 2.33719e-11 | 1.000000 |
| rad36                         | 1.82288e-11 | 1.000000 | 1.82288e-11 | 1.000000 |
| rad59                         | 1.44065e-11 | 1.000000 | 1.44065e-11 | 1.000000 |
| PhcycC3H3_B+H                 | 1.06155e-11 | 1.000000 | 1.06155e-11 | 1.000000 |
| Phenyl+cycC3H4                | 8.20984e-12 | 1.000000 | 0.000000    | 1.000000 |
| rad43                         | 4.85040e-12 | 1.000000 | 4.85040e-12 | 1.000000 |
| rad54                         | 1.90355e-12 | 1.000000 | 1.90355e-12 | 1.000000 |
| rad62                         | 8.79886e-13 | 1.000000 | 8.79886e-13 | 1.000000 |
| rad50                         | 4.88070e-13 | 1.000000 | 4.88070e-13 | 1.000000 |
| rad14                         | 3.79249e-13 | 1.000000 | 3.79249e-13 | 1.000000 |
| rad27                         | 3.48317e-13 | 1.000000 | 3.48317e-13 | 1.000000 |
| rad70                         | 1.26270e-13 | 1.000000 | 1.26270e-13 | 1.000000 |
| rad5                          | 9.97740e-14 | 1.000000 | 9.97740e-14 | 1.000000 |
| PAH1+H                        | 9.44318e-14 | 1.000000 | 9.44318e-14 | 1.000000 |
| rad55                         | 3.81175e-14 | 1.000000 | 3.81175e-14 | 1.000000 |
| rad33                         | 3.59046e-14 | 1.000000 | 3.59046e-14 | 1.000000 |
| rad25                         | 2.46008e-14 | 1.000000 | 2.46008e-14 | 1.000000 |
| rad18                         | 1.59558e-14 | 1.000000 | 1.59558e-14 | 1.000000 |
| rad58                         | 1.04348e-14 | 1.000000 | 1.04348e-14 | 1.000000 |
| rad52                         | 7.43572e-15 | 1.000000 | 7.43572e-15 | 1.000000 |
| rad34                         | 5.86634e-15 | 1.000000 | 5.86634e-15 | 1.000000 |
| rad51                         | 4.56684e-15 | 1.000000 | 4.56684e-15 | 1.000000 |
| rad41                         | 3.48751e-15 | 1.000000 | 3.48751e-15 | 1.000000 |
| rad20                         | 2.88092e-15 | 1.000000 | 2.88092e-15 | 1.000000 |
| rad21                         | 1.90779e-15 | 1.000000 | 1.90779e-15 | 1.000000 |
| rad42                         | 1.43607e-15 | 1.000000 | 1.43607e-15 | 1.000000 |
| rad65                         | 1.32075e-16 | 1.000000 | 1.32075e-16 | 1.000000 |
| rad53                         | 6.72487e-17 | 1.000000 | 6.72487e-17 | 1.000000 |
| rad31                         | 5.31904e-17 | 1.000000 | 5.31904e-17 | 1.000000 |
| rad61                         | 3.11358e-17 | 1.000000 | 3.11358e-17 | 1.000000 |
| rad64                         | 2.66668e-17 | 1.000000 | 2.66668e-17 | 1.000000 |
| rad24                         | 6.29487e-18 | 1.000000 | 6.29487e-18 | 1.000000 |
| rad56                         | 2.44787e-18 | 1.000000 | 2.44787e-18 | 1.000000 |
| rad68syn                      | 3.55350e-19 | 1.000000 | 3.55350e-19 | 1.000000 |
| rad68anti                     | 2.54536e-19 | 1.000000 | 2.54536e-19 | 1.000000 |
| rad40syn                      | 1.66720e-20 | 1.000000 | 1.66720e-20 | 1.000000 |
| rad40anti                     | 1.28563e-20 | 1.000000 | 1.28563e-20 | 1.000000 |
| PAH8+H                        | 7.22004e-21 | 1.000000 | 7.22004e-21 | 1.000000 |
| rad19syn                      | 1.12392e-21 | 1.000000 | 1.12392e-21 | 1.000000 |
| rad73                         | 8.68659e-22 | 1.000000 | 8.68659e-22 | 1.000000 |
| rad47                         | 6.82567e-23 | 1.000000 | 6.82567e-23 | 1.000000 |

|       |             |         |             |         |
|-------|-------------|---------|-------------|---------|
| rad71 | 3.46343e-23 | 1.00000 | 3.46343e-23 | 1.00000 |
| rad72 | 1.86711e-29 | 1.00000 | 1.86711e-29 | 1.00000 |
| rad8  | 2.52947e-38 | 1.00000 | 2.52947e-38 | 1.00000 |

100.000000 Pa, 310.000000 K

| Rate constant             | True (fraction)        | Effective (fraction)   |
|---------------------------|------------------------|------------------------|
| Total                     | 5.92544e-14 (1.00 )    | 5.92544e-14 (1.00 )    |
| Formation of rad19        | 5.91462e-14 (0.998 )   | 5.91462e-14 (0.998 )   |
| H-abstraction to cyc2enyl | 1.07628e-16 (0.00182 ) | 1.07628e-16 (0.00182 ) |
| H-abstraction to cyc1enyl | 5.62537e-19 (9.49e-06) | 5.62537e-19 (9.49e-06) |

| species                       | PYtrue      | Cumul    | PYeffective | Cumul    |
|-------------------------------|-------------|----------|-------------|----------|
| Indene+H                      | 0.985650    | 0.985650 | 0.985650    | 0.985650 |
| rad9                          | 0.0119550   | 0.997605 | 0.0119550   | 0.997605 |
| Benzene+cycloprop-2-enylidene | 0.00181637  | 0.999421 | 0.00181637  | 0.999421 |
| PhCHCCH2+H                    | 0.000509815 | 0.999931 | 0.000509815 | 0.999931 |
| rad6                          | 2.22857e-05 | 0.999954 | 2.22857e-05 | 0.999954 |
| rad15                         | 1.17614e-05 | 0.999965 | 1.17614e-05 | 0.999965 |
| Benzene+cycloprop-1-enylidene | 9.49359e-06 | 0.999975 | 9.49359e-06 | 0.999975 |
| PhCCH+CH3                     | 7.06935e-06 | 0.999982 | 7.06935e-06 | 0.999982 |
| PhCCCH3+H                     | 5.45258e-06 | 0.999987 | 5.45258e-06 | 0.999987 |
| Ph+MeAc                       | 5.08908e-06 | 0.999992 | 5.08908e-06 | 0.999992 |
| C2H2+PhCH2                    | 4.17611e-06 | 0.999997 | 4.17611e-06 | 0.999997 |
| rad67                         | 1.59825e-06 | 0.999998 | 1.59825e-06 | 0.999998 |
| rad35                         | 6.70237e-07 | 0.999999 | 6.70237e-07 | 0.999999 |
| rad2                          | 2.47427e-07 | 0.999999 | 2.47427e-07 | 0.999999 |
| rad26                         | 2.26676e-07 | 0.999999 | 2.26676e-07 | 0.999999 |
| Ph+Allene                     | 2.07453e-07 | 1.000000 | 2.07453e-07 | 1.000000 |
| PhCH2CCH+H                    | 4.30317e-08 | 1.000000 | 4.30317e-08 | 1.000000 |
| rad28                         | 3.13555e-08 | 1.000000 | 3.13555e-08 | 1.000000 |
| rad10                         | 2.36816e-08 | 1.000000 | 2.36816e-08 | 1.000000 |
| rad37                         | 2.04340e-08 | 1.000000 | 2.04340e-08 | 1.000000 |
| rad1                          | 1.92342e-08 | 1.000000 | 1.92342e-08 | 1.000000 |
| rad30                         | 1.24472e-08 | 1.000000 | 1.24472e-08 | 1.000000 |
| PAH7+H                        | 1.08534e-08 | 1.000000 | 1.08534e-08 | 1.000000 |
| rad7                          | 7.26915e-09 | 1.000000 | 7.26915e-09 | 1.000000 |
| rad23                         | 7.06339e-09 | 1.000000 | 7.06339e-09 | 1.000000 |
| rad39                         | 2.99738e-09 | 1.000000 | 2.99738e-09 | 1.000000 |
| rad11                         | 2.90682e-09 | 1.000000 | 2.90682e-09 | 1.000000 |
| rad3                          | 2.79198e-09 | 1.000000 | 2.79198e-09 | 1.000000 |
| rad4                          | 1.49219e-09 | 1.000000 | 1.49219e-09 | 1.000000 |
| PAH9+H                        | 6.02555e-10 | 1.000000 | 6.02555e-10 | 1.000000 |
| rad45                         | 4.52920e-10 | 1.000000 | 4.52920e-10 | 1.000000 |
| PhcycC3H3_A+H                 | 4.06575e-10 | 1.000000 | 4.06575e-10 | 1.000000 |
| rad38                         | 3.85461e-10 | 1.000000 | 3.85461e-10 | 1.000000 |
| PAH10+CH3                     | 1.68264e-10 | 1.000000 | 1.68264e-10 | 1.000000 |
| rad60syn                      | 9.64295e-11 | 1.000000 | 9.64295e-11 | 1.000000 |
| PAH3+H                        | 8.11258e-11 | 1.000000 | 8.11258e-11 | 1.000000 |
| rad12                         | 7.81935e-11 | 1.000000 | 7.81935e-11 | 1.000000 |
| rad60anti                     | 4.95997e-11 | 1.000000 | 4.95997e-11 | 1.000000 |
| rad22                         | 4.09798e-11 | 1.000000 | 4.09798e-11 | 1.000000 |
| rad36                         | 3.00294e-11 | 1.000000 | 3.00294e-11 | 1.000000 |
| rad19anti                     | 2.44946e-11 | 1.000000 | 2.44946e-11 | 1.000000 |
| rad13                         | 2.40093e-11 | 1.000000 | 2.40093e-11 | 1.000000 |
| rad46                         | 2.15760e-11 | 1.000000 | 2.15760e-11 | 1.000000 |
| rad59                         | 1.48574e-11 | 1.000000 | 1.48574e-11 | 1.000000 |
| PhcycC3H3_B+H                 | 1.40924e-11 | 1.000000 | 1.40924e-11 | 1.000000 |
| Phenyl+cycC3H4                | 1.07882e-11 | 1.000000 | 0.000000    | 1.000000 |
| rad43                         | 5.05008e-12 | 1.000000 | 5.05008e-12 | 1.000000 |
| rad54                         | 1.25529e-12 | 1.000000 | 1.25529e-12 | 1.000000 |
| rad62                         | 8.91348e-13 | 1.000000 | 8.91348e-13 | 1.000000 |
| rad50                         | 4.35160e-13 | 1.000000 | 4.35160e-13 | 1.000000 |
| rad14                         | 3.87747e-13 | 1.000000 | 3.87747e-13 | 1.000000 |
| rad27                         | 3.33553e-13 | 1.000000 | 3.33553e-13 | 1.000000 |
| PAH1+H                        | 1.14620e-13 | 1.000000 | 1.14620e-13 | 1.000000 |
| rad70                         | 1.05225e-13 | 1.000000 | 1.05225e-13 | 1.000000 |
| rad5                          | 5.66965e-14 | 1.000000 | 5.66965e-14 | 1.000000 |
| rad33                         | 2.94573e-14 | 1.000000 | 2.94573e-14 | 1.000000 |
| rad55                         | 2.56886e-14 | 1.000000 | 2.56886e-14 | 1.000000 |
| rad25                         | 2.37107e-14 | 1.000000 | 2.37107e-14 | 1.000000 |
| rad58                         | 1.17535e-14 | 1.000000 | 1.17535e-14 | 1.000000 |
| rad18                         | 1.10172e-14 | 1.000000 | 1.10172e-14 | 1.000000 |
| rad52                         | 6.30287e-15 | 1.000000 | 6.30287e-15 | 1.000000 |
| rad34                         | 4.73374e-15 | 1.000000 | 4.73374e-15 | 1.000000 |
| rad51                         | 3.98466e-15 | 1.000000 | 3.98466e-15 | 1.000000 |
| rad41                         | 3.68453e-15 | 1.000000 | 3.68453e-15 | 1.000000 |
| rad42                         | 1.46479e-15 | 1.000000 | 1.46479e-15 | 1.000000 |

|           |             |          |             |          |
|-----------|-------------|----------|-------------|----------|
| rad20     | 1.36543e-15 | 1.000000 | 1.36543e-15 | 1.000000 |
| rad21     | 8.49213e-16 | 1.000000 | 8.49213e-16 | 1.000000 |
| rad65     | 1.14096e-16 | 1.000000 | 1.14096e-16 | 1.000000 |
| rad53     | 3.80163e-17 | 1.000000 | 3.80163e-17 | 1.000000 |
| rad61     | 3.04193e-17 | 1.000000 | 3.04193e-17 | 1.000000 |
| rad31     | 2.40798e-17 | 1.000000 | 2.40798e-17 | 1.000000 |
| rad64     | 1.33298e-17 | 1.000000 | 1.33298e-17 | 1.000000 |
| rad24     | 4.44830e-18 | 1.000000 | 4.44830e-18 | 1.000000 |
| rad56     | 1.09413e-18 | 1.000000 | 1.09413e-18 | 1.000000 |
| rad68syn  | 2.29274e-19 | 1.000000 | 2.29274e-19 | 1.000000 |
| rad68anti | 1.66321e-19 | 1.000000 | 1.66321e-19 | 1.000000 |
| rad40syn  | 1.46212e-20 | 1.000000 | 1.46212e-20 | 1.000000 |
| rad40anti | 1.24504e-20 | 1.000000 | 1.24504e-20 | 1.000000 |
| PAH8+H    | 4.42482e-21 | 1.000000 | 4.42482e-21 | 1.000000 |
| rad73     | 4.25894e-22 | 1.000000 | 4.25894e-22 | 1.000000 |
| rad47     | 1.63213e-23 | 1.000000 | 1.63213e-23 | 1.000000 |
| rad71     | 8.64229e-24 | 1.000000 | 8.64229e-24 | 1.000000 |
| rad19syn  | 1.62295e-25 | 1.000000 | 1.62295e-25 | 1.000000 |
| rad8      | 1.99783e-48 | 1.000000 | 1.99783e-48 | 1.000000 |

100.000000 Pa, 400.000000 K

| Rate constant             | True (fraction)        | Effective (fraction)   |
|---------------------------|------------------------|------------------------|
| Total                     | 1.29463e-13 (1.00 )    | 1.29463e-13 (1.00 )    |
| Formation of rad19        | 1.28526e-13 (0.993 )   | 1.28526e-13 (0.993 )   |
| H-abstraction to cyc2enyl | 9.19357e-16 (0.00710 ) | 9.19357e-16 (0.00710 ) |
| H-abstraction to cyclenyl | 1.69485e-17 (0.000131) | 1.69485e-17 (0.000131) |

| species                       | PYtrue      | Cumul    | PYeffective | Cumul    |
|-------------------------------|-------------|----------|-------------|----------|
| Indene+H                      | 0.988033    | 0.988033 | 0.988033    | 0.988033 |
| Benzene+cycloprop-2-enylidene | 0.00710133  | 0.995135 | 0.00710133  | 0.995135 |
| rad9                          | 0.00367559  | 0.998810 | 0.00367559  | 0.998810 |
| PhCHCCH2+H                    | 0.000961858 | 0.999772 | 0.000961858 | 0.999772 |
| Benzene+cycloprop-1-enylidene | 0.000130914 | 0.999903 | 0.000130914 | 0.999903 |
| rad6                          | 2.83411e-05 | 0.999931 | 2.83411e-05 | 0.999931 |
| PhCCH+CH3                     | 1.58369e-05 | 0.999947 | 1.58369e-05 | 0.999947 |
| C2H2+PhCH2                    | 1.48945e-05 | 0.999962 | 1.48945e-05 | 0.999962 |
| Ph+MeAc                       | 1.34578e-05 | 0.999975 | 1.34578e-05 | 0.999975 |
| PhCCCH3+H                     | 1.23119e-05 | 0.999988 | 1.23119e-05 | 0.999988 |
| rad67                         | 4.05674e-06 | 0.999992 | 4.05674e-06 | 0.999992 |
| rad15                         | 3.61618e-06 | 0.999995 | 3.61618e-06 | 0.999995 |
| rad35                         | 1.62159e-06 | 0.999997 | 1.62159e-06 | 0.999997 |
| Ph+Allene                     | 1.59998e-06 | 0.999999 | 1.59998e-06 | 0.999999 |
| PhCH2CCH+H                    | 4.11074e-07 | 0.999999 | 4.11074e-07 | 0.999999 |
| PAH7+H                        | 1.32542e-07 | 0.999999 | 1.32542e-07 | 0.999999 |
| rad2                          | 1.13266e-07 | 0.999999 | 1.13266e-07 | 0.999999 |
| rad37                         | 8.24015e-08 | 0.999999 | 8.24015e-08 | 0.999999 |
| rad26                         | 7.48579e-08 | 0.999999 | 7.48579e-08 | 0.999999 |
| rad28                         | 4.54898e-08 | 1.000000 | 4.54898e-08 | 1.000000 |
| rad39                         | 3.20312e-08 | 1.000000 | 3.20312e-08 | 1.000000 |
| rad30                         | 3.16771e-08 | 1.000000 | 3.16771e-08 | 1.000000 |
| rad1                          | 1.05412e-08 | 1.000000 | 1.05412e-08 | 1.000000 |
| rad23                         | 1.03732e-08 | 1.000000 | 1.03732e-08 | 1.000000 |
| rad10                         | 9.94575e-09 | 1.000000 | 9.94575e-09 | 1.000000 |
| rad7                          | 8.77205e-09 | 1.000000 | 8.77205e-09 | 1.000000 |
| PhcycC3H3_A+H                 | 4.88977e-09 | 1.000000 | 4.88977e-09 | 1.000000 |
| PAH9+H                        | 3.77936e-09 | 1.000000 | 3.77936e-09 | 1.000000 |
| rad11                         | 3.22336e-09 | 1.000000 | 3.22336e-09 | 1.000000 |
| rad38                         | 2.35970e-09 | 1.000000 | 2.35970e-09 | 1.000000 |
| PAH10+CH3                     | 1.87825e-09 | 1.000000 | 1.87825e-09 | 1.000000 |
| rad3                          | 1.48451e-09 | 1.000000 | 1.48451e-09 | 1.000000 |
| rad45                         | 8.92569e-10 | 1.000000 | 8.92569e-10 | 1.000000 |
| rad4                          | 7.81826e-10 | 1.000000 | 7.81826e-10 | 1.000000 |
| PAH3+H                        | 5.11869e-10 | 1.000000 | 5.11869e-10 | 1.000000 |
| PhcycC3H3_B+H                 | 4.16222e-10 | 1.000000 | 4.16222e-10 | 1.000000 |
| rad60syn                      | 3.56626e-10 | 1.000000 | 3.56626e-10 | 1.000000 |
| Phenyl+cycC3H4                | 2.22329e-10 | 1.000000 | 0.000000    | 1.000000 |
| rad60anti                     | 1.90103e-10 | 1.000000 | 1.90103e-10 | 1.000000 |
| rad46                         | 1.58211e-10 | 1.000000 | 1.58211e-10 | 1.000000 |
| rad19anti                     | 1.12088e-10 | 1.000000 | 1.12088e-10 | 1.000000 |
| rad59                         | 8.10901e-11 | 1.000000 | 8.10901e-11 | 1.000000 |
| rad12                         | 6.34552e-11 | 1.000000 | 6.34552e-11 | 1.000000 |
| rad22                         | 5.20109e-11 | 1.000000 | 5.20109e-11 | 1.000000 |
| rad54                         | 3.65844e-11 | 1.000000 | 3.65844e-11 | 1.000000 |
| rad36                         | 3.41975e-11 | 1.000000 | 3.41975e-11 | 1.000000 |
| rad43                         | 3.36435e-11 | 1.000000 | 3.36435e-11 | 1.000000 |
| rad13                         | 3.18075e-11 | 1.000000 | 3.18075e-11 | 1.000000 |
| rad50                         | 6.21967e-12 | 1.000000 | 6.21967e-12 | 1.000000 |

|           |             |          |             |          |
|-----------|-------------|----------|-------------|----------|
| rad62     | 6.13644e-12 | 1.000000 | 6.13644e-12 | 1.000000 |
| PAH1+H    | 2.74552e-12 | 1.000000 | 2.74552e-12 | 1.000000 |
| rad70     | 2.67593e-12 | 1.000000 | 2.67593e-12 | 1.000000 |
| rad55     | 9.76415e-13 | 1.000000 | 9.76415e-13 | 1.000000 |
| rad14     | 1.98594e-13 | 1.000000 | 1.98594e-13 | 1.000000 |
| rad34     | 1.79732e-13 | 1.000000 | 1.79732e-13 | 1.000000 |
| rad27     | 1.69732e-13 | 1.000000 | 1.69732e-13 | 1.000000 |
| rad58     | 1.68549e-13 | 1.000000 | 1.68549e-13 | 1.000000 |
| rad52     | 1.37033e-13 | 1.000000 | 1.37033e-13 | 1.000000 |
| rad51     | 1.19745e-13 | 1.000000 | 1.19745e-13 | 1.000000 |
| rad41     | 6.96060e-14 | 1.000000 | 6.96060e-14 | 1.000000 |
| rad33     | 5.56166e-14 | 1.000000 | 5.56166e-14 | 1.000000 |
| rad25     | 3.35447e-14 | 1.000000 | 3.35447e-14 | 1.000000 |
| rad5      | 2.70535e-14 | 1.000000 | 2.70535e-14 | 1.000000 |
| rad42     | 2.43111e-14 | 1.000000 | 2.43111e-14 | 1.000000 |
| rad18     | 1.85515e-14 | 1.000000 | 1.85515e-14 | 1.000000 |
| rad53     | 5.27887e-15 | 1.000000 | 5.27887e-15 | 1.000000 |
| rad20     | 4.67971e-15 | 1.000000 | 4.67971e-15 | 1.000000 |
| rad65     | 3.70566e-15 | 1.000000 | 3.70566e-15 | 1.000000 |
| rad61     | 3.60747e-15 | 1.000000 | 3.60747e-15 | 1.000000 |
| rad21     | 3.20815e-15 | 1.000000 | 3.20815e-15 | 1.000000 |
| rad64     | 2.34318e-15 | 1.000000 | 2.34318e-15 | 1.000000 |
| rad56     | 4.65556e-16 | 1.000000 | 4.65556e-16 | 1.000000 |
| rad31     | 4.47165e-16 | 1.000000 | 4.47165e-16 | 1.000000 |
| rad19syn  | 2.04439e-16 | 1.000000 | 2.04439e-16 | 1.000000 |
| rad68syn  | 6.92817e-17 | 1.000000 | 6.92817e-17 | 1.000000 |
| rad68anti | 4.84833e-17 | 1.000000 | 4.84833e-17 | 1.000000 |
| rad24     | 1.45067e-17 | 1.000000 | 1.45067e-17 | 1.000000 |
| rad40syn  | 6.85299e-18 | 1.000000 | 6.85299e-18 | 1.000000 |
| PAH8+H    | 6.50057e-18 | 1.000000 | 6.50057e-18 | 1.000000 |
| rad40anti | 5.17801e-18 | 1.000000 | 5.17801e-18 | 1.000000 |
| rad73     | 7.18622e-19 | 1.000000 | 7.18622e-19 | 1.000000 |
| rad71     | 1.06621e-19 | 1.000000 | 1.06621e-19 | 1.000000 |
| rad47     | 5.04654e-21 | 1.000000 | 5.04654e-21 | 1.000000 |
| rad72     | 3.05835e-23 | 1.000000 | 3.05835e-23 | 1.000000 |
| rad8      | 3.15881e-35 | 1.000000 | 3.15881e-35 | 1.000000 |

100.000000 Pa, 500.000000 K

=====

| Rate constant             | True (fraction)        | Effective (fraction)   |
|---------------------------|------------------------|------------------------|
| Total                     | 2.52837e-13 (1.00 )    | 2.52837e-13 (1.00 )    |
| Formation of rad19        | 2.47941e-13 (0.981 )   | 2.47941e-13 (0.981 )   |
| H-abstraction to cyc2enyl | 4.69058e-15 (0.0186 )  | 4.69058e-15 (0.0186 )  |
| H-abstraction to cyc1enyl | 2.05381e-16 (0.000812) | 2.05381e-16 (0.000812) |

| species                       | PYtrue      | Cumul    | PYeffective | Cumul    |
|-------------------------------|-------------|----------|-------------|----------|
| Indene+H                      | 0.977049    | 0.977049 | 0.977049    | 0.977049 |
| Benzene+cycloprop-2-enylidene | 0.0185518   | 0.995601 | 0.0185518   | 0.995601 |
| PhCHCCH2+H                    | 0.00200433  | 0.997605 | 0.00200433  | 0.997605 |
| rad9                          | 0.00138674  | 0.998992 | 0.00138674  | 0.998992 |
| Benzene+cycloprop-1-enylidene | 0.000812306 | 0.999804 | 0.000812306 | 0.999804 |
| C2H2+PhCH2                    | 4.45909e-05 | 0.999848 | 4.45909e-05 | 0.999848 |
| Ph+MeAc                       | 3.57162e-05 | 0.999884 | 3.57162e-05 | 0.999884 |
| PhCCH+CH3                     | 3.39611e-05 | 0.999918 | 3.39611e-05 | 0.999918 |
| PhCCCH3+H                     | 2.79891e-05 | 0.999946 | 2.79891e-05 | 0.999946 |
| rad6                          | 2.53756e-05 | 0.999972 | 2.53756e-05 | 0.999972 |
| rad67                         | 1.05416e-05 | 0.999982 | 1.05416e-05 | 0.999982 |
| Ph+Allene                     | 8.88259e-06 | 0.999991 | 8.88259e-06 | 0.999991 |
| rad35                         | 4.08984e-06 | 0.999995 | 4.08984e-06 | 0.999995 |
| PhCH2CCH+H                    | 2.49674e-06 | 0.999998 | 2.49674e-06 | 0.999998 |
| rad15                         | 1.35927e-06 | 0.999999 | 1.35927e-06 | 0.999999 |
| PAH7+H                        | 6.51623e-07 | 1.000000 | 6.51623e-07 | 1.000000 |
| rad37                         | 2.84819e-07 | 1.000000 | 2.84819e-07 | 1.000000 |
| rad39                         | 1.53978e-07 | 1.000000 | 1.53978e-07 | 1.000000 |
| rad30                         | 8.79854e-08 | 1.000000 | 8.79854e-08 | 1.000000 |
| rad2                          | 7.67921e-08 | 1.000000 | 7.67921e-08 | 1.000000 |
| PhcycC3H3_A+H                 | 5.05566e-08 | 1.000000 | 5.05566e-08 | 1.000000 |
| rad28                         | 4.17619e-08 | 1.000000 | 4.17619e-08 | 1.000000 |
| rad23                         | 2.46831e-08 | 1.000000 | 2.46831e-08 | 1.000000 |
| rad26                         | 2.36593e-08 | 1.000000 | 2.36593e-08 | 1.000000 |
| PAH9+H                        | 1.84097e-08 | 1.000000 | 1.84097e-08 | 1.000000 |
| PAH10+CH3                     | 1.46791e-08 | 1.000000 | 1.46791e-08 | 1.000000 |
| rad38                         | 1.24275e-08 | 1.000000 | 1.24275e-08 | 1.000000 |
| rad1                          | 9.17027e-09 | 1.000000 | 9.17027e-09 | 1.000000 |
| rad19anti                     | 9.14480e-09 | 1.000000 | 9.14480e-09 | 1.000000 |
| PhcycC3H3_B+H                 | 7.94083e-09 | 1.000000 | 7.94083e-09 | 1.000000 |
| rad7                          | 7.74870e-09 | 1.000000 | 7.74870e-09 | 1.000000 |
| rad10                         | 5.86184e-09 | 1.000000 | 5.86184e-09 | 1.000000 |

|                |             |         |             |         |
|----------------|-------------|---------|-------------|---------|
| rad45          | 3.69220e-09 | 1.00000 | 3.69220e-09 | 1.00000 |
| Phenyl+cycC3H4 | 3.55663e-09 | 1.00000 | 0.00000     | 1.00000 |
| PAH3+H         | 3.00287e-09 | 1.00000 | 3.00287e-09 | 1.00000 |
| rad11          | 2.85911e-09 | 1.00000 | 2.85911e-09 | 1.00000 |
| rad60syn       | 1.42489e-09 | 1.00000 | 1.42489e-09 | 1.00000 |
| rad3           | 1.26902e-09 | 1.00000 | 1.26902e-09 | 1.00000 |
| rad46          | 9.58933e-10 | 1.00000 | 9.58933e-10 | 1.00000 |
| rad60anti      | 7.81343e-10 | 1.00000 | 7.81343e-10 | 1.00000 |
| rad4           | 7.14437e-10 | 1.00000 | 7.14437e-10 | 1.00000 |
| rad59          | 4.44871e-10 | 1.00000 | 4.44871e-10 | 1.00000 |
| rad54          | 3.96355e-10 | 1.00000 | 3.96355e-10 | 1.00000 |
| rad43          | 1.99666e-10 | 1.00000 | 1.99666e-10 | 1.00000 |
| rad36          | 1.71889e-10 | 1.00000 | 1.71889e-10 | 1.00000 |
| rad50          | 6.70541e-11 | 1.00000 | 6.70541e-11 | 1.00000 |
| rad12          | 6.17408e-11 | 1.00000 | 6.17408e-11 | 1.00000 |
| rad22          | 6.02556e-11 | 1.00000 | 6.02556e-11 | 1.00000 |
| PAH1+H         | 4.44231e-11 | 1.00000 | 4.44231e-11 | 1.00000 |
| rad62          | 3.57971e-11 | 1.00000 | 3.57971e-11 | 1.00000 |
| rad70          | 3.43256e-11 | 1.00000 | 3.43256e-11 | 1.00000 |
| rad13          | 3.18327e-11 | 1.00000 | 3.18327e-11 | 1.00000 |
| rad55          | 1.31188e-11 | 1.00000 | 1.31188e-11 | 1.00000 |
| rad34          | 3.01832e-12 | 1.00000 | 3.01832e-12 | 1.00000 |
| rad51          | 2.48297e-12 | 1.00000 | 2.48297e-12 | 1.00000 |
| rad58          | 2.12899e-12 | 1.00000 | 2.12899e-12 | 1.00000 |
| rad52          | 2.04101e-12 | 1.00000 | 2.04101e-12 | 1.00000 |
| rad19syn       | 1.45992e-12 | 1.00000 | 1.45992e-12 | 1.00000 |
| rad41          | 9.07264e-13 | 1.00000 | 9.07264e-13 | 1.00000 |
| rad42          | 2.70330e-13 | 1.00000 | 2.70330e-13 | 1.00000 |
| rad53          | 1.64252e-13 | 1.00000 | 1.64252e-13 | 1.00000 |
| rad61          | 1.58648e-13 | 1.00000 | 1.58648e-13 | 1.00000 |
| rad14          | 1.45081e-13 | 1.00000 | 1.45081e-13 | 1.00000 |
| rad27          | 1.13658e-13 | 1.00000 | 1.13658e-13 | 1.00000 |
| rad65          | 7.83562e-14 | 1.00000 | 7.83562e-14 | 1.00000 |
| rad64          | 7.39396e-14 | 1.00000 | 7.39396e-14 | 1.00000 |
| rad33          | 6.84386e-14 | 1.00000 | 6.84386e-14 | 1.00000 |
| rad25          | 3.45373e-14 | 1.00000 | 3.45373e-14 | 1.00000 |
| rad56          | 2.78447e-14 | 1.00000 | 2.78447e-14 | 1.00000 |
| rad31          | 2.31174e-14 | 1.00000 | 2.31174e-14 | 1.00000 |
| rad18          | 1.90265e-14 | 1.00000 | 1.90265e-14 | 1.00000 |
| rad5           | 1.07306e-14 | 1.00000 | 1.07306e-14 | 1.00000 |
| rad20          | 8.13851e-15 | 1.00000 | 8.13851e-15 | 1.00000 |
| rad21          | 6.00613e-15 | 1.00000 | 6.00613e-15 | 1.00000 |
| rad68syn       | 4.33995e-15 | 1.00000 | 4.33995e-15 | 1.00000 |
| rad68anti      | 2.97554e-15 | 1.00000 | 2.97554e-15 | 1.00000 |
| PAH8+H         | 1.80895e-15 | 1.00000 | 1.80895e-15 | 1.00000 |
| rad73          | 1.03908e-15 | 1.00000 | 1.03908e-15 | 1.00000 |
| rad71          | 8.01125e-16 | 1.00000 | 8.01125e-16 | 1.00000 |
| rad40syn       | 7.96031e-16 | 1.00000 | 7.96031e-16 | 1.00000 |
| rad40anti      | 5.93494e-16 | 1.00000 | 5.93494e-16 | 1.00000 |
| rad24          | 9.46021e-17 | 1.00000 | 9.46021e-17 | 1.00000 |
| rad72          | 9.61342e-18 | 1.00000 | 9.61342e-18 | 1.00000 |
| rad47          | 4.80462e-19 | 1.00000 | 4.80462e-19 | 1.00000 |
| rad8           | 5.38841e-31 | 1.00000 | 5.38841e-31 | 1.00000 |

100.000000 Pa, 600.000000 K

| Rate constant             | True (fraction)        | Effective (fraction)   |
|---------------------------|------------------------|------------------------|
| Total                     | 4.35570e-13 (1.00 )    | 4.35570e-13 (1.00 )    |
| Formation of rad19        | 4.18892e-13 (0.962 )   | 4.18892e-13 (0.962 )   |
| H-abstraction to cyc2enyl | 1.54751e-14 (0.0355 )  | 1.54751e-14 (0.0355 )  |
| H-abstraction to cyclenyl | 1.20343e-15 (0.00276 ) | 1.20343e-15 (0.00276 ) |

  

| species                       | PYtrue      | Cumul    | PYeffective | Cumul    |
|-------------------------------|-------------|----------|-------------|----------|
| Indene+H                      | 0.956351    | 0.956351 | 0.956351    | 0.956351 |
| Benzene+cycloprop-2-enylidene | 0.0355285   | 0.991879 | 0.0355285   | 0.991879 |
| PhCHCCH2+H                    | 0.00405173  | 0.995931 | 0.00405173  | 0.995931 |
| Benzene+cycloprop-1-enylidene | 0.00276289  | 0.998694 | 0.00276289  | 0.998694 |
| rad9                          | 0.000883513 | 0.999578 | 0.000883513 | 0.999578 |
| C2H2+PhCH2                    | 0.000109061 | 0.999687 | 0.000109061 | 0.999687 |
| Ph+MeAc                       | 8.66270e-05 | 0.999773 | 8.66270e-05 | 0.999773 |
| PhCCH+CH3                     | 6.60171e-05 | 0.999839 | 6.60171e-05 | 0.999839 |
| PhCCCH3+H                     | 5.94560e-05 | 0.999899 | 5.94560e-05 | 0.999899 |
| Ph+Allene                     | 3.41803e-05 | 0.999933 | 3.41803e-05 | 0.999933 |
| rad67                         | 2.57741e-05 | 0.999959 | 2.57741e-05 | 0.999959 |
| rad6                          | 1.50872e-05 | 0.999974 | 1.50872e-05 | 0.999974 |
| PhCH2CCH+H                    | 1.06631e-05 | 0.999984 | 1.06631e-05 | 0.999984 |
| rad35                         | 9.76557e-06 | 0.999994 | 9.76557e-06 | 0.999994 |
| PAH7+H                        | 2.12259e-06 | 0.999996 | 2.12259e-06 | 0.999996 |

|                |             |          |             |          |
|----------------|-------------|----------|-------------|----------|
| rad37          | 8.82615e-07 | 0.999997 | 8.82615e-07 | 0.999997 |
| rad15          | 8.18696e-07 | 0.999998 | 8.18696e-07 | 0.999998 |
| rad39          | 4.85709e-07 | 0.999999 | 4.85709e-07 | 0.999999 |
| PhcycC3H3_A+H  | 3.74192e-07 | 0.999999 | 3.74192e-07 | 0.999999 |
| rad30          | 2.30420e-07 | 0.999999 | 2.30420e-07 | 0.999999 |
| PhcycC3H3_B+H  | 1.00810e-07 | 0.999999 | 1.00810e-07 | 0.999999 |
| PAH10+CH3      | 9.03029e-08 | 0.999999 | 9.03029e-08 | 0.999999 |
| rad2           | 8.62717e-08 | 0.999999 | 8.62717e-08 | 0.999999 |
| PAH9+H         | 7.34517e-08 | 0.999999 | 7.34517e-08 | 0.999999 |
| rad23          | 6.62985e-08 | 1.000000 | 6.62985e-08 | 1.000000 |
| rad19anti      | 5.56067e-08 | 1.000000 | 5.56067e-08 | 1.000000 |
| rad38          | 5.42255e-08 | 1.000000 | 5.42255e-08 | 1.000000 |
| Phenyl+cycC3H4 | 3.58093e-08 | 1.000000 | 0.00000     | 1.000000 |
| rad28          | 2.48405e-08 | 1.000000 | 2.48405e-08 | 1.000000 |
| PAH3+H         | 1.53601e-08 | 1.000000 | 1.53601e-08 | 1.000000 |
| rad45          | 1.51783e-08 | 1.000000 | 1.51783e-08 | 1.000000 |
| rad1           | 1.27900e-08 | 1.000000 | 1.27900e-08 | 1.000000 |
| rad26          | 9.17859e-09 | 1.000000 | 9.17859e-09 | 1.000000 |
| rad60syn       | 5.18395e-09 | 1.000000 | 5.18395e-09 | 1.000000 |
| rad46          | 4.76583e-09 | 1.000000 | 4.76583e-09 | 1.000000 |
| rad7           | 4.65917e-09 | 1.000000 | 4.65917e-09 | 1.000000 |
| rad10          | 3.99284e-09 | 1.000000 | 3.99284e-09 | 1.000000 |
| rad60anti      | 2.91370e-09 | 1.000000 | 2.91370e-09 | 1.000000 |
| rad54          | 2.59904e-09 | 1.000000 | 2.59904e-09 | 1.000000 |
| rad59          | 2.12592e-09 | 1.000000 | 2.12593e-09 | 1.000000 |
| rad11          | 1.75880e-09 | 1.000000 | 1.75881e-09 | 1.000000 |
| rad3           | 1.43242e-09 | 1.000000 | 1.43242e-09 | 1.000000 |
| rad43          | 9.59082e-10 | 1.000000 | 9.59082e-10 | 1.000000 |
| rad36          | 9.30870e-10 | 1.000000 | 9.30870e-10 | 1.000000 |
| rad4           | 8.75397e-10 | 1.000000 | 8.75397e-10 | 1.000000 |
| rad50          | 6.89952e-10 | 1.000000 | 6.89952e-10 | 1.000000 |
| PAH1+H         | 4.43502e-10 | 1.000000 | 4.43502e-10 | 1.000000 |
| rad70          | 2.73540e-10 | 1.000000 | 2.73540e-10 | 1.000000 |
| rad12          | 2.19093e-10 | 1.000000 | 2.19093e-10 | 1.000000 |
| rad62          | 1.59923e-10 | 1.000000 | 1.59923e-10 | 1.000000 |
| rad19syn       | 1.52297e-10 | 1.000000 | 1.52297e-10 | 1.000000 |
| rad55          | 1.02187e-10 | 1.000000 | 1.02187e-10 | 1.000000 |
| rad22          | 9.05880e-11 | 1.000000 | 9.05880e-11 | 1.000000 |
| rad51          | 7.47968e-11 | 1.000000 | 7.47968e-11 | 1.000000 |
| rad52          | 3.40930e-11 | 1.000000 | 3.40930e-11 | 1.000000 |
| rad34          | 3.04302e-11 | 1.000000 | 3.04302e-11 | 1.000000 |
| rad13          | 2.41582e-11 | 1.000000 | 2.41582e-11 | 1.000000 |
| rad58          | 2.14095e-11 | 1.000000 | 2.14095e-11 | 1.000000 |
| rad41          | 8.26228e-12 | 1.000000 | 8.26228e-12 | 1.000000 |
| rad61          | 4.88958e-12 | 1.000000 | 4.88958e-12 | 1.000000 |
| rad53          | 2.65432e-12 | 1.000000 | 2.65432e-12 | 1.000000 |
| rad65          | 2.18345e-12 | 1.000000 | 2.18345e-12 | 1.000000 |
| rad42          | 1.98475e-12 | 1.000000 | 1.98475e-12 | 1.000000 |
| rad64          | 1.15516e-12 | 1.000000 | 1.15516e-12 | 1.000000 |
| rad71          | 1.07107e-12 | 1.000000 | 1.07107e-12 | 1.000000 |
| rad56          | 8.74756e-13 | 1.000000 | 8.74757e-13 | 1.000000 |
| rad73          | 8.40039e-13 | 1.000000 | 8.40039e-13 | 1.000000 |
| PAH8+H         | 5.03759e-13 | 1.000000 | 5.03759e-13 | 1.000000 |
| rad31          | 3.39171e-13 | 1.000000 | 3.39171e-13 | 1.000000 |
| rad68syn       | 1.93477e-13 | 1.000000 | 1.93477e-13 | 1.000000 |
| rad68anti      | 1.28732e-13 | 1.000000 | 1.28732e-13 | 1.000000 |
| rad14          | 1.27269e-13 | 1.000000 | 1.27269e-13 | 1.000000 |
| rad27          | 1.01337e-13 | 1.000000 | 1.01337e-13 | 1.000000 |
| rad40syn       | 9.39433e-14 | 1.000000 | 9.39433e-14 | 1.000000 |
| rad33          | 7.38848e-14 | 1.000000 | 7.38848e-14 | 1.000000 |
| rad40anti      | 7.33803e-14 | 1.000000 | 7.33803e-14 | 1.000000 |
| rad72          | 3.08013e-14 | 1.000000 | 3.08013e-14 | 1.000000 |
| rad25          | 2.78969e-14 | 1.000000 | 2.78969e-14 | 1.000000 |
| rad18          | 1.85610e-14 | 1.000000 | 1.85610e-14 | 1.000000 |
| rad20          | 1.70264e-14 | 1.000000 | 1.70264e-14 | 1.000000 |
| rad21          | 1.44980e-14 | 1.000000 | 1.44980e-14 | 1.000000 |
| rad5           | 5.96934e-15 | 1.000000 | 5.96934e-15 | 1.000000 |
| rad24          | 1.04784e-15 | 1.000000 | 1.04784e-15 | 1.000000 |
| rad47          | 1.77387e-17 | 1.000000 | 1.77387e-17 | 1.000000 |
| rad8           | 4.97891e-26 | 1.000000 | 4.97891e-26 | 1.000000 |

100.000000 Pa, 700.000000 K

| Rate constant             | True (fraction)        | Effective (fraction)   |
|---------------------------|------------------------|------------------------|
| Total                     | 6.91694e-13 (1.00 )    | 6.91694e-13 (1.00 )    |
| Formation of rad19        | 6.47922e-13 (0.937 )   | 6.47922e-13 (0.937 )   |
| H-abstraction to cyc2enyl | 3.91858e-14 (0.0567 )  | 3.91858e-14 (0.0567 )  |
| H-abstraction to cyclenyl | 4.58543e-15 (0.00663 ) | 4.58542e-15 (0.00663 ) |

| species                       | PYtrue      | Cumul    | PYeffective | Cumul    |
|-------------------------------|-------------|----------|-------------|----------|
| Indene+H                      | 0.927124    | 0.927124 | 0.927124    | 0.927124 |
| Benzene+cycloprop-2-enylidene | 0.0566520   | 0.983776 | 0.0566520   | 0.983776 |
| PhCHCCH2+H                    | 0.00776069  | 0.991537 | 0.00776069  | 0.991537 |
| Phenene+cycloprop-1-enylidene | 0.00662927  | 0.998166 | 0.00662927  | 0.998166 |
| rad9                          | 0.000948802 | 0.999115 | 0.000948802 | 0.999115 |
| C2H2+PhCH2                    | 0.000226931 | 0.999342 | 0.000226931 | 0.999342 |
| Ph+MeAc                       | 0.000189941 | 0.999532 | 0.000189941 | 0.999532 |
| PhCCCH3+H                     | 0.000116644 | 0.999648 | 0.000116644 | 0.999648 |
| PhCCH+CH3                     | 0.000115253 | 0.999763 | 0.000115253 | 0.999763 |
| Ph+Allene                     | 0.000100937 | 0.999864 | 0.000100937 | 0.999864 |
| rad67                         | 5.79063e-05 | 0.999922 | 5.79063e-05 | 0.999922 |
| PhCH2CCH+H                    | 3.50163e-05 | 0.999957 | 3.50163e-05 | 0.999957 |
| rad35                         | 2.15507e-05 | 0.999979 | 2.15507e-05 | 0.999979 |
| rad6                          | 6.65432e-06 | 0.999986 | 6.65432e-06 | 0.999986 |
| PAH7+H                        | 5.28635e-06 | 0.999991 | 5.28635e-06 | 0.999991 |
| rad37                         | 2.41751e-06 | 0.999993 | 2.41751e-06 | 0.999993 |
| PhcycC3H3_A+H                 | 1.99503e-06 | 0.999995 | 1.99503e-06 | 0.999995 |
| rad39                         | 1.16251e-06 | 0.999996 | 1.16251e-06 | 0.999996 |
| PhcycC3H3_B+H                 | 7.54744e-07 | 0.999997 | 7.54744e-07 | 0.999997 |
| rad15                         | 6.01789e-07 | 0.999998 | 6.01789e-07 | 0.999998 |
| rad30                         | 5.54192e-07 | 0.999998 | 5.54192e-07 | 0.999998 |
| PAH10+CH3                     | 4.36468e-07 | 0.999999 | 4.36468e-07 | 0.999999 |
| PAH9+H                        | 2.48611e-07 | 0.999999 | 2.48611e-07 | 0.999999 |
| Phenyl+cycC3H4                | 2.47504e-07 | 0.999999 | 0.00000     | 0.999999 |
| rad38                         | 1.99023e-07 | 0.999999 | 1.99024e-07 | 0.999999 |
| rad23                         | 9.23103e-08 | 1.000000 | 9.23103e-08 | 0.999999 |
| rad2                          | 8.86529e-08 | 1.000000 | 8.86530e-08 | 0.999999 |
| rad19anti                     | 7.27665e-08 | 1.000000 | 7.27666e-08 | 0.999999 |
| PAH3+H                        | 6.63403e-08 | 1.000000 | 6.63403e-08 | 0.999999 |
| rad45                         | 2.33878e-08 | 1.000000 | 2.33878e-08 | 1.000000 |
| rad46                         | 1.98193e-08 | 1.000000 | 1.98193e-08 | 1.000000 |
| rad60syn                      | 1.66922e-08 | 1.000000 | 1.66922e-08 | 1.000000 |
| rad1                          | 1.60458e-08 | 1.000000 | 1.60458e-08 | 1.000000 |
| rad54                         | 1.18895e-08 | 1.000000 | 1.18895e-08 | 1.000000 |
| rad28                         | 1.09089e-08 | 1.000000 | 1.09089e-08 | 1.000000 |
| rad60anti                     | 9.58357e-09 | 1.000000 | 9.58357e-09 | 1.000000 |
| rad59                         | 8.61414e-09 | 1.000000 | 8.61414e-09 | 1.000000 |
| rad50                         | 5.30065e-09 | 1.000000 | 5.30065e-09 | 1.000000 |
| rad26                         | 4.51127e-09 | 1.000000 | 4.51128e-09 | 1.000000 |
| rad43                         | 3.75738e-09 | 1.000000 | 3.75738e-09 | 1.000000 |
| rad12                         | 3.60812e-09 | 1.000000 | 3.60812e-09 | 1.000000 |
| PAH1+H                        | 2.92559e-09 | 1.000000 | 2.92559e-09 | 1.000000 |
| rad10                         | 2.67427e-09 | 1.000000 | 2.67427e-09 | 1.000000 |
| rad7                          | 2.16980e-09 | 1.000000 | 2.16980e-09 | 1.000000 |
| rad36                         | 1.89544e-09 | 1.000000 | 1.89544e-09 | 1.000000 |
| rad70                         | 1.50430e-09 | 1.000000 | 1.50430e-09 | 1.000000 |
| rad3                          | 1.14314e-09 | 1.000000 | 1.14314e-09 | 1.000000 |
| rad51                         | 9.42779e-10 | 1.000000 | 9.42779e-10 | 1.000000 |
| rad19syn                      | 8.87890e-10 | 1.000000 | 8.87890e-10 | 1.000000 |
| rad11                         | 8.69241e-10 | 1.000000 | 8.69241e-10 | 1.000000 |
| rad4                          | 7.74927e-10 | 1.000000 | 7.74927e-10 | 1.000000 |
| rad62                         | 5.60547e-10 | 1.000000 | 5.60548e-10 | 1.000000 |
| rad55                         | 5.35604e-10 | 1.000000 | 5.35605e-10 | 1.000000 |
| rad52                         | 3.41981e-10 | 1.000000 | 3.41981e-10 | 1.000000 |
| rad34                         | 1.99981e-10 | 1.000000 | 1.99982e-10 | 1.000000 |
| rad58                         | 1.51160e-10 | 1.000000 | 1.51160e-10 | 1.000000 |
| rad22                         | 1.08594e-10 | 1.000000 | 1.08594e-10 | 1.000000 |
| rad61                         | 5.31714e-11 | 1.000000 | 5.31714e-11 | 1.000000 |
| rad41                         | 5.28031e-11 | 1.000000 | 5.28032e-11 | 1.000000 |
| rad65                         | 2.63840e-11 | 1.000000 | 2.63840e-11 | 1.000000 |
| rad71                         | 2.38570e-11 | 1.000000 | 2.38570e-11 | 1.000000 |
| rad53                         | 2.30486e-11 | 1.000000 | 2.30486e-11 | 1.000000 |
| rad73                         | 1.74948e-11 | 1.000000 | 1.74948e-11 | 1.000000 |
| rad13                         | 1.69193e-11 | 1.000000 | 1.69193e-11 | 1.000000 |
| rad42                         | 1.03155e-11 | 1.000000 | 1.03155e-11 | 1.000000 |
| rad64                         | 9.84960e-12 | 1.000000 | 9.84960e-12 | 1.000000 |
| rad56                         | 9.72005e-12 | 1.000000 | 9.72005e-12 | 1.000000 |
| PAH8+H                        | 6.72046e-12 | 1.000000 | 6.72046e-12 | 1.000000 |
| rad68syn                      | 2.26888e-12 | 1.000000 | 2.26888e-12 | 1.000000 |
| rad68anti                     | 1.50311e-12 | 1.000000 | 1.50311e-12 | 1.000000 |
| rad40syn                      | 1.21973e-12 | 1.000000 | 1.21973e-12 | 1.000000 |
| rad31                         | 9.83405e-13 | 1.000000 | 9.83405e-13 | 1.000000 |
| rad40anti                     | 9.60605e-13 | 1.000000 | 9.60605e-13 | 1.000000 |
| rad72                         | 7.70517e-13 | 1.000000 | 7.70517e-13 | 1.000000 |
| rad27                         | 1.08762e-13 | 1.000000 | 1.08762e-13 | 1.000000 |
| rad14                         | 1.08306e-13 | 1.000000 | 1.08306e-13 | 1.000000 |
| rad33                         | 9.71415e-14 | 1.000000 | 9.71415e-14 | 1.000000 |
| rad21                         | 6.05868e-14 | 1.000000 | 6.05868e-14 | 1.000000 |



|       |             |          |             |          |
|-------|-------------|----------|-------------|----------|
| rad20 | 5.58283e-14 | 1.000000 | 5.58284e-14 | 1.000000 |
| rad18 | 2.40281e-14 | 1.000000 | 2.40281e-14 | 1.000000 |
| rad25 | 2.20924e-14 | 1.000000 | 2.20924e-14 | 1.000000 |
| rad24 | 1.22404e-14 | 1.000000 | 1.22404e-14 | 1.000000 |
| rad5  | 3.79179e-15 | 1.000000 | 3.79179e-15 | 1.000000 |
| rad47 | 4.67098e-16 | 1.000000 | 4.67098e-16 | 1.000000 |
| rad8  | 8.10665e-21 | 1.000000 | 8.10666e-21 | 1.000000 |

100.000000 Pa, 800.000000 K

| Rate constant             | True (fraction)       | Effective (fraction)  |
|---------------------------|-----------------------|-----------------------|
| Total                     | 1.03759e-12 (1.00 )   | 1.03758e-12 (1.00 )   |
| Formation of rad19        | 9.41065e-13 (0.907 )  | 9.41063e-13 (0.907 )  |
| H-abstraction to cyc2enyl | 8.32953e-14 (0.0803 ) | 8.32953e-14 (0.0803 ) |
| H-abstraction to cyclenyl | 1.32261e-14 (0.0127 ) | 1.32261e-14 (0.0127 ) |

| species                       | PYtrue      | Cumul    | PYeffective | Cumul    |
|-------------------------------|-------------|----------|-------------|----------|
| Indene+H                      | 0.889711    | 0.889711 | 0.889712    | 0.889712 |
| Benzene+cycloprop-2-enylidene | 0.0802780   | 0.969989 | 0.0802781   | 0.969990 |
| PhCHCCH2+H                    | 0.0140265   | 0.984015 | 0.0140265   | 0.984016 |
| Benzene+cycloprop-1-enylidene | 0.0127470   | 0.996762 | 0.0127470   | 0.996763 |
| rad9                          | 0.00148716  | 0.998249 | 0.00148716  | 0.998250 |
| C2H2+PhCH2                    | 0.000424575 | 0.998674 | 0.000424575 | 0.998675 |
| Ph+MeAc                       | 0.000380175 | 0.999054 | 0.000380176 | 0.999055 |
| Ph+Allene                     | 0.000248408 | 0.999303 | 0.000248408 | 0.999303 |
| PhCCCH3+H                     | 0.000212288 | 0.999515 | 0.000212289 | 0.999516 |
| PhCCH+CH3                     | 0.000185056 | 0.999700 | 0.000185056 | 0.999701 |
| rad67                         | 0.000119860 | 0.999820 | 0.000119860 | 0.999821 |
| PhCH2CCH+H                    | 9.62600e-05 | 0.999916 | 9.62600e-05 | 0.999917 |
| rad35                         | 4.40174e-05 | 0.999960 | 4.40175e-05 | 0.999961 |
| PAH7+H                        | 1.10378e-05 | 0.999971 | 1.10378e-05 | 0.999972 |
| PhcycC3H3_A+H                 | 7.81924e-06 | 0.999979 | 7.81925e-06 | 0.999980 |
| rad37                         | 5.91756e-06 | 0.999985 | 5.91757e-06 | 0.999986 |
| PhcycC3H3_B+H                 | 3.45129e-06 | 0.999988 | 3.45130e-06 | 0.999989 |
| rad6                          | 2.67235e-06 | 0.999991 | 2.67236e-06 | 0.999992 |
| rad39                         | 2.31545e-06 | 0.999993 | 2.31545e-06 | 0.999994 |
| PAH10+CH3                     | 1.79267e-06 | 0.999995 | 1.79267e-06 | 0.999996 |
| Phenyl+cycC3H4                | 1.26494e-06 | 0.999996 | 0.00000     | 0.999996 |
| rad30                         | 1.23296e-06 | 0.999997 | 1.23296e-06 | 0.999997 |
| PAH9+H                        | 7.35701e-07 | 0.999998 | 7.35702e-07 | 0.999998 |
| rad38                         | 6.34010e-07 | 0.999999 | 6.34011e-07 | 0.999999 |
| rad15                         | 5.49293e-07 | 0.999999 | 5.49294e-07 | 0.999999 |
| PAH3+H                        | 2.55908e-07 | 1.000000 | 2.55908e-07 | 0.999999 |
| rad23                         | 8.54595e-08 | 1.000000 | 8.54596e-08 | 0.999999 |
| rad12                         | 8.36715e-08 | 1.000000 | 8.36716e-08 | 0.999999 |
| rad46                         | 6.81790e-08 | 1.000000 | 6.81791e-08 | 1.000000 |
| rad2                          | 6.39707e-08 | 1.000000 | 6.39708e-08 | 1.000000 |
| rad19anti                     | 6.15990e-08 | 1.000000 | 6.15991e-08 | 1.000000 |
| rad60syn                      | 4.87981e-08 | 1.000000 | 4.87981e-08 | 1.000000 |
| rad54                         | 4.28575e-08 | 1.000000 | 4.28575e-08 | 1.000000 |
| rad59                         | 3.11104e-08 | 1.000000 | 3.11104e-08 | 1.000000 |
| rad60anti                     | 2.85741e-08 | 1.000000 | 2.85741e-08 | 1.000000 |
| rad45                         | 2.57087e-08 | 1.000000 | 2.57087e-08 | 1.000000 |
| rad50                         | 2.39545e-08 | 1.000000 | 2.39545e-08 | 1.000000 |
| PAH1+H                        | 1.53822e-08 | 1.000000 | 1.53823e-08 | 1.000000 |
| rad1                          | 1.36985e-08 | 1.000000 | 1.36985e-08 | 1.000000 |
| rad43                         | 1.27003e-08 | 1.000000 | 1.27003e-08 | 1.000000 |
| rad70                         | 6.62329e-09 | 1.000000 | 6.62330e-09 | 1.000000 |
| rad51                         | 4.47709e-09 | 1.000000 | 4.47710e-09 | 1.000000 |
| rad28                         | 4.38073e-09 | 1.000000 | 4.38074e-09 | 1.000000 |
| rad26                         | 2.45178e-09 | 1.000000 | 2.45179e-09 | 1.000000 |
| rad36                         | 2.41592e-09 | 1.000000 | 2.41593e-09 | 1.000000 |
| rad55                         | 2.18009e-09 | 1.000000 | 2.18010e-09 | 1.000000 |
| rad10                         | 1.67400e-09 | 1.000000 | 1.67400e-09 | 1.000000 |
| rad62                         | 1.63786e-09 | 1.000000 | 1.63787e-09 | 1.000000 |
| rad52                         | 1.61687e-09 | 1.000000 | 1.61687e-09 | 1.000000 |
| rad19syn                      | 1.44428e-09 | 1.000000 | 1.44428e-09 | 1.000000 |
| rad34                         | 1.03789e-09 | 1.000000 | 1.03789e-09 | 1.000000 |
| rad7                          | 1.01005e-09 | 1.000000 | 1.01005e-09 | 1.000000 |
| rad58                         | 8.84069e-10 | 1.000000 | 8.84071e-10 | 1.000000 |
| rad3                          | 6.89365e-10 | 1.000000 | 6.89365e-10 | 1.000000 |
| rad4                          | 5.05412e-10 | 1.000000 | 5.05413e-10 | 1.000000 |
| rad11                         | 4.59435e-10 | 1.000000 | 4.59436e-10 | 1.000000 |
| rad61                         | 4.37673e-10 | 1.000000 | 4.37674e-10 | 1.000000 |
| rad41                         | 2.74228e-10 | 1.000000 | 2.74227e-10 | 1.000000 |
| rad53                         | 1.51000e-10 | 1.000000 | 1.51000e-10 | 1.000000 |
| rad65                         | 1.27448e-10 | 1.000000 | 1.27449e-10 | 1.000000 |
| rad71                         | 1.02339e-10 | 1.000000 | 1.02339e-10 | 1.000000 |

|           |             |         |             |          |
|-----------|-------------|---------|-------------|----------|
| rad22     | 9.92439e-11 | 1.00000 | 9.92439e-11 | 1.000000 |
| rad56     | 8.07974e-11 | 1.00000 | 8.07975e-11 | 1.000000 |
| rad73     | 7.58048e-11 | 1.00000 | 7.58049e-11 | 1.000000 |
| rad64     | 5.91432e-11 | 1.00000 | 5.91433e-11 | 1.000000 |
| PAH8+H    | 4.66841e-11 | 1.00000 | 4.66842e-11 | 1.000000 |
| rad42     | 4.25720e-11 | 1.00000 | 4.25721e-11 | 1.000000 |
| rad68syn  | 1.82590e-11 | 1.00000 | 1.82590e-11 | 1.000000 |
| rad13     | 1.51077e-11 | 1.00000 | 1.51077e-11 | 1.000000 |
| rad68anti | 1.20795e-11 | 1.00000 | 1.20795e-11 | 1.000000 |
| rad40syn  | 9.37413e-12 | 1.00000 | 9.37422e-12 | 1.000000 |
| rad40anti | 7.28348e-12 | 1.00000 | 7.28349e-12 | 1.000000 |
| rad72     | 3.29014e-12 | 1.00000 | 3.29014e-12 | 1.000000 |
| rad31     | 1.52417e-12 | 1.00000 | 1.52417e-12 | 1.000000 |
| rad21     | 6.68028e-13 | 1.00000 | 6.68029e-13 | 1.000000 |
| rad24     | 4.77990e-13 | 1.00000 | 4.77991e-13 | 1.000000 |
| rad20     | 4.11174e-13 | 1.00000 | 4.11174e-13 | 1.000000 |
| rad33     | 2.72508e-13 | 1.00000 | 2.72509e-13 | 1.000000 |
| rad27     | 1.38679e-13 | 1.00000 | 1.38679e-13 | 1.000000 |
| rad14     | 9.71035e-14 | 1.00000 | 9.71035e-14 | 1.000000 |
| rad18     | 8.09313e-14 | 1.00000 | 8.09314e-14 | 1.000000 |
| rad25     | 2.61488e-14 | 1.00000 | 2.61488e-14 | 1.000000 |
| rad47     | 4.04043e-15 | 1.00000 | 4.04043e-15 | 1.000000 |
| rad5      | 2.64715e-15 | 1.00000 | 2.64715e-15 | 1.000000 |
| rad8      | 3.04240e-16 | 1.00000 | 3.04241e-16 | 1.000000 |

100.000000 Pa, 900.000000 K

| Rate constant             | True (fraction)       | Effective (fraction)  |
|---------------------------|-----------------------|-----------------------|
| Total                     | 1.49199e-12 (1.00 )   | 1.49199e-12 (1.00 )   |
| Formation of rad19        | 1.30395e-12 (0.874 )  | 1.30394e-12 (0.874 )  |
| H-abstraction to cyc2enyl | 1.56554e-13 (0.105 )  | 1.56554e-13 (0.105 )  |
| H-abstraction to cyclenyl | 3.14892e-14 (0.0211 ) | 3.14890e-14 (0.0211 ) |

| species                       | PYtrue      | Cumul    | PYeffective | Cumul    |
|-------------------------------|-------------|----------|-------------|----------|
| Indene+H                      | 0.845283    | 0.845283 | 0.845288    | 0.845288 |
| Benzene+cycloprop-2-enylidene | 0.104929    | 0.950213 | 0.104930    | 0.950218 |
| PhCHCCH2+H                    | 0.0238204   | 0.974033 | 0.0238205   | 0.974039 |
| Benzene+cycloprop-1-enylidene | 0.0211054   | 0.995139 | 0.0211054   | 0.995144 |
| rad9                          | 0.00162412  | 0.996763 | 0.00162412  | 0.996768 |
| C2H2+PhCH2                    | 0.000734043 | 0.997497 | 0.000734047 | 0.997502 |
| Ph+MeAc                       | 0.000697195 | 0.998194 | 0.000697199 | 0.998199 |
| Ph+Allene                     | 0.000526501 | 0.998720 | 0.000526504 | 0.998726 |
| PhCCCH3+H                     | 0.000358299 | 0.999079 | 0.000358301 | 0.999084 |
| PhCCH+CH3                     | 0.000279158 | 0.999358 | 0.000279160 | 0.999363 |
| PhCH2CCH+H                    | 0.000230689 | 0.999589 | 0.000230690 | 0.999594 |
| rad67                         | 0.000228644 | 0.999817 | 0.000228646 | 0.999823 |
| rad35                         | 8.32102e-05 | 0.999900 | 8.32107e-05 | 0.999906 |
| PhcycC3H3_A+H                 | 2.62559e-05 | 0.999927 | 2.62561e-05 | 0.999932 |
| PAH7+H                        | 2.01480e-05 | 0.999947 | 2.01480e-05 | 0.999952 |
| PhcycC3H3_B+H                 | 1.42011e-05 | 0.999961 | 1.42011e-05 | 0.999966 |
| rad37                         | 1.28844e-05 | 0.999974 | 1.28845e-05 | 0.999979 |
| PAH10+CH3                     | 6.51726e-06 | 0.999980 | 6.51730e-06 | 0.999986 |
| Phenyl+cycC3H4                | 5.08123e-06 | 0.999986 | 0.00000     | 0.999986 |
| rad39                         | 4.01445e-06 | 0.999990 | 4.01447e-06 | 0.999990 |
| rad30                         | 2.54839e-06 | 0.999992 | 2.54841e-06 | 0.999992 |
| PAH9+H                        | 2.08404e-06 | 0.999994 | 2.08406e-06 | 0.999995 |
| rad38                         | 1.85148e-06 | 0.999996 | 1.85149e-06 | 0.999996 |
| rad6                          | 9.70058e-07 | 0.999997 | 9.70066e-07 | 0.999997 |
| PAH3+H                        | 9.66824e-07 | 0.999998 | 9.66832e-07 | 0.999998 |
| rad15                         | 4.68057e-07 | 0.999998 | 4.68060e-07 | 0.999999 |
| rad12                         | 4.28083e-07 | 0.999999 | 4.28085e-07 | 0.999999 |
| rad46                         | 2.29457e-07 | 0.999999 | 2.29458e-07 | 0.999999 |
| rad60syn                      | 1.33602e-07 | 0.999999 | 1.33603e-07 | 1.000000 |
| rad54                         | 1.26267e-07 | 0.999999 | 1.26268e-07 | 1.000000 |
| rad50                         | 1.20942e-07 | 0.999999 | 1.20943e-07 | 1.000000 |
| rad59                         | 1.07367e-07 | 1.000000 | 1.07367e-07 | 1.000000 |
| rad60anti                     | 7.98996e-08 | 1.000000 | 7.99000e-08 | 1.000000 |
| PAH1+H                        | 7.55599e-08 | 1.000000 | 7.55603e-08 | 1.000000 |
| rad23                         | 7.44230e-08 | 1.000000 | 7.44234e-08 | 1.000000 |
| rad19anti                     | 4.64128e-08 | 1.000000 | 4.64130e-08 | 1.000000 |
| rad2                          | 4.02556e-08 | 1.000000 | 4.02558e-08 | 1.000000 |
| rad43                         | 3.87811e-08 | 1.000000 | 3.87812e-08 | 1.000000 |
| rad51                         | 2.79804e-08 | 1.000000 | 2.79806e-08 | 1.000000 |
| rad45                         | 2.69813e-08 | 1.000000 | 2.69815e-08 | 1.000000 |
| rad70                         | 2.58050e-08 | 1.000000 | 2.58052e-08 | 1.000000 |
| rad1                          | 9.92571e-09 | 1.000000 | 9.92579e-09 | 1.000000 |
| rad52                         | 9.20259e-09 | 1.000000 | 9.20258e-09 | 1.000000 |
| rad55                         | 7.20083e-09 | 1.000000 | 7.20087e-09 | 1.000000 |

|           |             |         |             |         |
|-----------|-------------|---------|-------------|---------|
| rad58     | 5.71885e-09 | 1.00000 | 5.71888e-09 | 1.00000 |
| rad34     | 4.94918e-09 | 1.00000 | 4.94920e-09 | 1.00000 |
| rad62     | 4.14510e-09 | 1.00000 | 4.14513e-09 | 1.00000 |
| rad61     | 3.99377e-09 | 1.00000 | 3.99379e-09 | 1.00000 |
| rad36     | 2.65411e-09 | 1.00000 | 2.65413e-09 | 1.00000 |
| rad28     | 1.59002e-09 | 1.00000 | 1.59003e-09 | 1.00000 |
| rad19syn  | 1.51735e-09 | 1.00000 | 1.51736e-09 | 1.00000 |
| rad41     | 1.36415e-09 | 1.00000 | 1.36416e-09 | 1.00000 |
| rad26     | 1.22727e-09 | 1.00000 | 1.22728e-09 | 1.00000 |
| rad10     | 1.08116e-09 | 1.00000 | 1.08116e-09 | 1.00000 |
| rad53     | 8.43151e-10 | 1.00000 | 8.43155e-10 | 1.00000 |
| rad65     | 8.04955e-10 | 1.00000 | 8.04959e-10 | 1.00000 |
| PAH8+H    | 7.80028e-10 | 1.00000 | 7.80032e-10 | 1.00000 |
| rad71     | 7.35126e-10 | 1.00000 | 7.35130e-10 | 1.00000 |
| rad56     | 6.32657e-10 | 1.00000 | 6.32660e-10 | 1.00000 |
| rad73     | 5.46148e-10 | 1.00000 | 5.46150e-10 | 1.00000 |
| rad7      | 4.92957e-10 | 1.00000 | 4.92959e-10 | 1.00000 |
| rad3      | 4.11902e-10 | 1.00000 | 4.11905e-10 | 1.00000 |
| rad4      | 3.20399e-10 | 1.00000 | 3.20402e-10 | 1.00000 |
| rad64     | 3.13578e-10 | 1.00000 | 3.13579e-10 | 1.00000 |
| rad11     | 2.77356e-10 | 1.00000 | 2.77358e-10 | 1.00000 |
| rad68syn  | 1.92136e-10 | 1.00000 | 1.92137e-10 | 1.00000 |
| rad42     | 1.53051e-10 | 1.00000 | 1.53051e-10 | 1.00000 |
| rad40syn  | 1.29707e-10 | 1.00000 | 1.29708e-10 | 1.00000 |
| rad68anti | 1.25796e-10 | 1.00000 | 1.25797e-10 | 1.00000 |
| rad22     | 1.07052e-10 | 1.00000 | 1.07053e-10 | 1.00000 |
| rad40anti | 1.02443e-10 | 1.00000 | 1.02444e-10 | 1.00000 |
| rad72     | 2.32058e-11 | 1.00000 | 2.32059e-11 | 1.00000 |
| rad13     | 1.93325e-11 | 1.00000 | 1.93326e-11 | 1.00000 |
| rad21     | 1.82066e-11 | 1.00000 | 1.82067e-11 | 1.00000 |
| rad24     | 8.32256e-12 | 1.00000 | 8.32260e-12 | 1.00000 |
| rad20     | 7.04174e-12 | 1.00000 | 7.04178e-12 | 1.00000 |
| rad33     | 2.59689e-12 | 1.00000 | 2.59691e-12 | 1.00000 |
| rad31     | 1.90836e-12 | 1.00000 | 1.90836e-12 | 1.00000 |
| rad18     | 9.72793e-13 | 1.00000 | 9.72801e-13 | 1.00000 |
| rad8      | 6.24414e-13 | 1.00000 | 6.24417e-13 | 1.00000 |
| rad27     | 2.35777e-13 | 1.00000 | 2.35777e-13 | 1.00000 |
| rad14     | 1.11895e-13 | 1.00000 | 1.11895e-13 | 1.00000 |
| rad25     | 8.44242e-14 | 1.00000 | 8.44246e-14 | 1.00000 |
| rad47     | 2.98248e-14 | 1.00000 | 2.98250e-14 | 1.00000 |
| rad5      | 1.76481e-15 | 1.00000 | 1.76481e-15 | 1.00000 |

100.000000 Pa, 1000.00000 K

=====

| Rate constant             | True (fraction)       | Effective (fraction)  |
|---------------------------|-----------------------|-----------------------|
| Total                     | 2.07591e-12 (1.00 )   | 2.07587e-12 (1.00 )   |
| Formation of rad19        | 1.74189e-12 (0.839 )  | 1.74186e-12 (0.839 )  |
| H-abstraction to cyc2enyl | 2.68753e-13 (0.129 )  | 2.68753e-13 (0.129 )  |
| H-abstraction to cyclenyl | 6.52627e-14 (0.0314 ) | 6.52614e-14 (0.0314 ) |

| species                       | PYtrue      | Cumul    | PYeffective | Cumul    |
|-------------------------------|-------------|----------|-------------|----------|
| Indene+H                      | 0.795676    | 0.795676 | 0.795690    | 0.795690 |
| Benzene+cycloprop-2-enylidene | 0.129463    | 0.925139 | 0.129465    | 0.925155 |
| PhCHCCH2+H                    | 0.0369358   | 0.962075 | 0.0369364   | 0.962092 |
| Benzene+cycloprop-1-enylidene | 0.0314382   | 0.993513 | 0.0314381   | 0.993530 |
| C2H2+PhCH2                    | 0.00115075  | 0.994664 | 0.00115077  | 0.994681 |
| Ph+MeAc                       | 0.00113882  | 0.995803 | 0.00113884  | 0.995820 |
| rad9                          | 0.00110282  | 0.996906 | 0.00110283  | 0.996922 |
| Ph+Allene                     | 0.000941595 | 0.997847 | 0.000941617 | 0.997864 |
| PhCCCH3+H                     | 0.000549497 | 0.998397 | 0.000549507 | 0.998414 |
| PhCH2CCH+H                    | 0.000451940 | 0.998849 | 0.000451948 | 0.998865 |
| PhCCH+CH3                     | 0.000393374 | 0.999242 | 0.000393380 | 0.999259 |
| rad67                         | 0.000385968 | 0.999628 | 0.000385974 | 0.999645 |
| rad35                         | 0.000139723 | 0.999768 | 0.000139726 | 0.999785 |
| PhcycC3H3_A+H                 | 7.22310e-05 | 0.999840 | 7.22322e-05 | 0.999857 |
| PhcycC3H3_B+H                 | 4.52455e-05 | 0.999885 | 4.52463e-05 | 0.999902 |
| PAH7+H                        | 3.22432e-05 | 0.999917 | 3.22437e-05 | 0.999934 |
| rad37                         | 2.36972e-05 | 0.999941 | 2.36976e-05 | 0.999958 |
| Phenyl+cycC3H4                | 1.68097e-05 | 0.999958 | 0.00000     | 0.999958 |
| PAH10+CH3                     | 1.60992e-05 | 0.999974 | 1.60995e-05 | 0.999974 |
| rad39                         | 6.14448e-06 | 0.999980 | 6.14459e-06 | 0.999980 |
| PAH9+H                        | 4.63829e-06 | 0.999985 | 4.63838e-06 | 0.999985 |
| rad30                         | 4.58237e-06 | 0.999989 | 4.58245e-06 | 0.999989 |
| rad38                         | 4.14195e-06 | 0.999994 | 4.14202e-06 | 0.999994 |
| PAH3+H                        | 2.46598e-06 | 0.999996 | 2.46602e-06 | 0.999996 |
| rad12                         | 7.35592e-07 | 0.999997 | 7.35604e-07 | 0.999997 |
| rad46                         | 5.61236e-07 | 0.999997 | 5.61247e-07 | 0.999997 |
| rad6                          | 3.73608e-07 | 0.999998 | 3.73614e-07 | 0.999998 |

|           |             |          |             |          |
|-----------|-------------|----------|-------------|----------|
| rad15     | 3.65083e-07 | 0.999998 | 3.65088e-07 | 0.999998 |
| rad50     | 3.56020e-07 | 0.999998 | 3.56026e-07 | 0.999998 |
| rad60syn  | 2.88736e-07 | 0.999999 | 2.88742e-07 | 0.999999 |
| rad54     | 2.77711e-07 | 0.999999 | 2.77716e-07 | 0.999999 |
| rad59     | 2.62230e-07 | 0.999999 | 2.62234e-07 | 0.999999 |
| PAH1+H    | 2.11581e-07 | 0.999999 | 2.11585e-07 | 0.999999 |
| rad60anti | 1.74798e-07 | 1.000000 | 1.74801e-07 | 1.000000 |
| rad51     | 9.03600e-08 | 1.000000 | 9.03615e-08 | 1.000000 |
| rad43     | 8.83437e-08 | 1.000000 | 8.83451e-08 | 1.000000 |
| rad23     | 6.80356e-08 | 1.000000 | 6.80368e-08 | 1.000000 |
| rad70     | 6.59118e-08 | 1.000000 | 6.59130e-08 | 1.000000 |
| rad19anti | 3.46116e-08 | 1.000000 | 3.46121e-08 | 1.000000 |
| rad52     | 2.84572e-08 | 1.000000 | 2.84577e-08 | 1.000000 |
| rad45     | 2.80682e-08 | 1.000000 | 2.80687e-08 | 1.000000 |
| rad2      | 2.77923e-08 | 1.000000 | 2.77927e-08 | 1.000000 |
| rad58     | 1.76327e-08 | 1.000000 | 1.76329e-08 | 1.000000 |
| rad55     | 1.68417e-08 | 1.000000 | 1.68420e-08 | 1.000000 |
| rad34     | 1.37179e-08 | 1.000000 | 1.37181e-08 | 1.000000 |
| rad61     | 1.31461e-08 | 1.000000 | 1.31463e-08 | 1.000000 |
| rad62     | 8.41188e-09 | 1.000000 | 8.41203e-09 | 1.000000 |
| rad1      | 7.40238e-09 | 1.000000 | 7.40251e-09 | 1.000000 |
| rad41     | 3.84038e-09 | 1.000000 | 3.84045e-09 | 1.000000 |
| PAH8+H    | 2.97529e-09 | 1.000000 | 2.97534e-09 | 1.000000 |
| rad71     | 2.79515e-09 | 1.000000 | 2.79520e-09 | 1.000000 |
| rad36     | 2.75571e-09 | 1.000000 | 2.75576e-09 | 1.000000 |
| rad65     | 2.58769e-09 | 1.000000 | 2.58774e-09 | 1.000000 |
| rad53     | 2.43736e-09 | 1.000000 | 2.43741e-09 | 1.000000 |
| rad73     | 2.01711e-09 | 1.000000 | 2.01715e-09 | 1.000000 |
| rad56     | 2.00259e-09 | 1.000000 | 2.00263e-09 | 1.000000 |
| rad19syn  | 1.42443e-09 | 1.000000 | 1.42446e-09 | 1.000000 |
| rad10     | 9.30972e-10 | 1.000000 | 9.30986e-10 | 1.000000 |
| rad64     | 9.05253e-10 | 1.000000 | 9.05276e-10 | 1.000000 |
| rad68syn  | 6.61931e-10 | 1.000000 | 6.61943e-10 | 1.000000 |
| rad26     | 6.58203e-10 | 1.000000 | 6.58214e-10 | 1.000000 |
| rad28     | 6.16648e-10 | 1.000000 | 6.16658e-10 | 1.000000 |
| rad40syn  | 4.74291e-10 | 1.000000 | 4.74299e-10 | 1.000000 |
| rad68anti | 4.32400e-10 | 1.000000 | 4.32407e-10 | 1.000000 |
| rad42     | 3.77668e-10 | 1.000000 | 3.77675e-10 | 1.000000 |
| rad40anti | 3.76241e-10 | 1.000000 | 3.76248e-10 | 1.000000 |
| rad7      | 3.16544e-10 | 1.000000 | 3.16549e-10 | 1.000000 |
| rad3      | 2.74553e-10 | 1.000000 | 2.74558e-10 | 1.000000 |
| rad11     | 2.46578e-10 | 1.000000 | 2.46582e-10 | 1.000000 |
| rad21     | 2.45206e-10 | 1.000000 | 2.45209e-10 | 1.000000 |
| rad22     | 2.41668e-10 | 1.000000 | 2.41672e-10 | 1.000000 |
| rad4      | 2.18515e-10 | 1.000000 | 2.18519e-10 | 1.000000 |
| rad72     | 9.32255e-11 | 1.000000 | 9.32270e-11 | 1.000000 |
| rad20     | 8.16636e-11 | 1.000000 | 8.16651e-11 | 1.000000 |
| rad8      | 6.75725e-11 | 1.000000 | 6.75737e-11 | 1.000000 |
| rad13     | 6.43093e-11 | 1.000000 | 6.43104e-11 | 1.000000 |
| rad24     | 3.67467e-11 | 1.000000 | 3.67473e-11 | 1.000000 |
| rad33     | 2.56192e-11 | 1.000000 | 2.56196e-11 | 1.000000 |
| rad18     | 9.71215e-12 | 1.000000 | 9.71237e-12 | 1.000000 |
| rad31     | 2.21231e-12 | 1.000000 | 2.21235e-12 | 1.000000 |
| rad25     | 1.07142e-12 | 1.000000 | 1.07144e-12 | 1.000000 |
| rad27     | 1.00871e-12 | 1.000000 | 1.00873e-12 | 1.000000 |
| rad14     | 2.03377e-13 | 1.000000 | 2.03380e-13 | 1.000000 |
| rad47     | 9.89079e-14 | 1.000000 | 9.89093e-14 | 1.000000 |
| rad5      | 1.41619e-15 | 1.000000 | 1.41622e-15 | 1.000000 |

100.000000 Pa, 1100.00000 K

| Rate constant             | True (fraction)       | Effective (fraction)  |
|---------------------------|-----------------------|-----------------------|
| Total                     | 2.81236e-12 (1.00 )   | 2.81222e-12 (1.00 )   |
| Formation of rad19        | 2.25993e-12 (0.804 )  | 2.25980e-12 (0.804 )  |
| H-abstraction to cyc2enyl | 4.30538e-13 (0.153 )  | 4.30538e-13 (0.153 )  |
| H-abstraction to cyclenyl | 1.21896e-13 (0.0433 ) | 1.21889e-13 (0.0433 ) |

| species                       | PYtrue      | Cumul    | PYeffective | Cumul    |
|-------------------------------|-------------|----------|-------------|----------|
| Indene+H                      | 0.742317    | 0.742317 | 0.742354    | 0.742354 |
| Benzene+cycloprop-2-enylidene | 0.153088    | 0.895404 | 0.153095    | 0.895449 |
| PhCHCCH2+H                    | 0.0524720   | 0.947876 | 0.0524746   | 0.947924 |
| Benzene+cycloprop-1-enylidene | 0.0433429   | 0.991219 | 0.0433425   | 0.991266 |
| Ph+MeAc                       | 0.00167529  | 0.992894 | 0.00167538  | 0.992942 |
| C2H2+PhCH2                    | 0.00164581  | 0.994540 | 0.00164590  | 0.994588 |
| Ph+Allene                     | 0.00146999  | 0.996010 | 0.00147006  | 0.996058 |
| PhCCCH3+H                     | 0.000772518 | 0.996783 | 0.000772557 | 0.996830 |
| PhCH2CCH+H                    | 0.000747309 | 0.997530 | 0.000747347 | 0.997578 |
| rad9                          | 0.000674663 | 0.998205 | 0.000674697 | 0.998252 |

|                |             |          |             |          |
|----------------|-------------|----------|-------------|----------|
| rad67          | 0.000582079 | 0.998787 | 0.000582108 | 0.998835 |
| PhCCH+CH3      | 0.000517912 | 0.999305 | 0.000517938 | 0.999352 |
| rad35          | 0.000209979 | 0.999515 | 0.000209990 | 0.999562 |
| PhcycC3H3_A+H  | 0.000166921 | 0.999682 | 0.000166930 | 0.999729 |
| PhcycC3H3_B+H  | 0.000115231 | 0.999797 | 0.000115237 | 0.999845 |
| Phenyl+cycC3H4 | 4.74555e-05 | 0.999844 | 0.00000     | 0.999845 |
| PAH7+H         | 4.62192e-05 | 0.999891 | 4.62215e-05 | 0.999891 |
| rad37          | 3.79793e-05 | 0.999929 | 3.79812e-05 | 0.999929 |
| PAH10+CH3      | 2.98026e-05 | 0.999958 | 2.98041e-05 | 0.999959 |
| rad39          | 8.45339e-06 | 0.999967 | 8.45388e-06 | 0.999967 |
| PAH9+H         | 8.03778e-06 | 0.999975 | 8.03819e-06 | 0.999975 |
| rad38          | 7.29467e-06 | 0.999982 | 7.29503e-06 | 0.999982 |
| rad30          | 7.21302e-06 | 0.999989 | 7.21338e-06 | 0.999990 |
| PAH3+H         | 4.45455e-06 | 0.999994 | 4.45477e-06 | 0.999994 |
| rad46          | 9.90415e-07 | 0.999995 | 9.90463e-07 | 0.999995 |
| rad12          | 7.94596e-07 | 0.999996 | 7.94636e-07 | 0.999996 |
| rad50          | 6.07629e-07 | 0.999996 | 6.07659e-07 | 0.999996 |
| rad60syn       | 4.99847e-07 | 0.999997 | 4.99872e-07 | 0.999997 |
| rad54          | 4.95986e-07 | 0.999997 | 4.96011e-07 | 0.999997 |
| rad59          | 4.71574e-07 | 0.999998 | 4.71598e-07 | 0.999998 |
| PAH1+H         | 3.91180e-07 | 0.999998 | 3.91199e-07 | 0.999998 |
| rad15          | 3.42509e-07 | 0.999998 | 3.42526e-07 | 0.999999 |
| rad60anti      | 3.04051e-07 | 0.999999 | 3.04066e-07 | 0.999999 |
| rad6           | 1.75322e-07 | 0.999999 | 1.75331e-07 | 0.999999 |
| rad43          | 1.57136e-07 | 0.999999 | 1.57145e-07 | 0.999999 |
| rad51          | 1.44297e-07 | 0.999999 | 1.44304e-07 | 0.999999 |
| rad70          | 1.21320e-07 | 0.999999 | 1.21326e-07 | 1.000000 |
| rad23          | 6.24679e-08 | 0.999999 | 6.24710e-08 | 1.000000 |
| rad52          | 4.71887e-08 | 0.999999 | 4.71910e-08 | 1.000000 |
| rad58          | 3.13239e-08 | 0.999999 | 3.13255e-08 | 1.000000 |
| rad55          | 3.09935e-08 | 0.999999 | 3.09951e-08 | 1.000000 |
| rad45          | 2.80091e-08 | 0.999999 | 2.80105e-08 | 1.000000 |
| rad19anti      | 2.59051e-08 | 0.999999 | 2.59064e-08 | 1.000000 |
| rad34          | 2.53586e-08 | 1.000000 | 2.53599e-08 | 1.000000 |
| rad61          | 2.32357e-08 | 1.000000 | 2.32368e-08 | 1.000000 |
| rad2           | 2.04562e-08 | 1.000000 | 2.04572e-08 | 1.000000 |
| rad62          | 1.41598e-08 | 1.000000 | 1.41605e-08 | 1.000000 |
| rad41          | 7.05316e-09 | 1.000000 | 7.05351e-09 | 1.000000 |
| rad1           | 5.57041e-09 | 1.000000 | 5.57069e-09 | 1.000000 |
| rad53          | 4.65607e-09 | 1.000000 | 4.65630e-09 | 1.000000 |
| PAH8+H         | 4.52570e-09 | 1.000000 | 4.52593e-09 | 1.000000 |
| rad65          | 4.18233e-09 | 1.000000 | 4.18254e-09 | 1.000000 |
| rad71          | 3.81156e-09 | 1.000000 | 3.81175e-09 | 1.000000 |
| rad56          | 3.70735e-09 | 1.000000 | 3.70753e-09 | 1.000000 |
| rad73          | 2.79878e-09 | 1.000000 | 2.79891e-09 | 1.000000 |
| rad36          | 2.73926e-09 | 1.000000 | 2.73940e-09 | 1.000000 |
| rad64          | 1.67609e-09 | 1.000000 | 1.67618e-09 | 1.000000 |
| rad19syn       | 1.28391e-09 | 1.000000 | 1.28398e-09 | 1.000000 |
| rad68syn       | 1.11977e-09 | 1.000000 | 1.11982e-09 | 1.000000 |
| rad21          | 1.03945e-09 | 1.000000 | 1.03950e-09 | 1.000000 |
| rad10          | 1.03190e-09 | 1.000000 | 1.03195e-09 | 1.000000 |
| rad8           | 7.96600e-10 | 1.000000 | 7.96640e-10 | 1.000000 |
| rad40syn       | 7.52740e-10 | 1.000000 | 7.52779e-10 | 1.000000 |
| rad68anti      | 7.32888e-10 | 1.000000 | 7.32925e-10 | 1.000000 |
| rad42          | 6.87222e-10 | 1.000000 | 6.87256e-10 | 1.000000 |
| rad40anti      | 5.93342e-10 | 1.000000 | 5.93371e-10 | 1.000000 |
| rad22          | 5.45912e-10 | 1.000000 | 5.45940e-10 | 1.000000 |
| rad11          | 4.95113e-10 | 1.000000 | 4.95137e-10 | 1.000000 |
| rad13          | 4.32739e-10 | 1.000000 | 4.32761e-10 | 1.000000 |
| rad26          | 4.19544e-10 | 1.000000 | 4.19566e-10 | 1.000000 |
| rad20          | 3.26157e-10 | 1.000000 | 3.26173e-10 | 1.000000 |
| rad7           | 3.14769e-10 | 1.000000 | 3.14786e-10 | 1.000000 |
| rad28          | 2.91709e-10 | 1.000000 | 2.91724e-10 | 1.000000 |
| rad3           | 1.90940e-10 | 1.000000 | 1.90950e-10 | 1.000000 |
| rad4           | 1.52734e-10 | 1.000000 | 1.52742e-10 | 1.000000 |
| rad72          | 1.25460e-10 | 1.000000 | 1.25467e-10 | 1.000000 |
| rad33          | 9.01042e-11 | 1.000000 | 9.01090e-11 | 1.000000 |
| rad24          | 7.85291e-11 | 1.000000 | 7.85330e-11 | 1.000000 |
| rad18          | 3.85527e-11 | 1.000000 | 3.85546e-11 | 1.000000 |
| rad25          | 9.12935e-12 | 1.000000 | 9.12983e-12 | 1.000000 |
| rad27          | 5.73340e-12 | 1.000000 | 5.73370e-12 | 1.000000 |
| rad31          | 2.42835e-12 | 1.000000 | 2.42847e-12 | 1.000000 |
| rad14          | 6.38634e-13 | 1.000000 | 6.38666e-13 | 1.000000 |
| rad47          | 1.48124e-13 | 1.000000 | 1.48130e-13 | 1.000000 |
| rad5           | 1.55617e-15 | 1.000000 | 1.55625e-15 | 1.000000 |

100.000000 Pa, 1200.00000 K

=====

Rate constant | True (fraction) | Effective (fraction)

-----

|                           |  |                       |                       |
|---------------------------|--|-----------------------|-----------------------|
| Total                     |  | 3.72623e-12 (1.00 )   | 3.72576e-12 (1.00 )   |
| Formation of rad19        |  | 2.86288e-12 (0.768 )  | 2.86245e-12 (0.768 )  |
| H-abstraction to cyc2enyl |  | 6.53266e-13 (0.175 )  | 6.53266e-13 (0.175 )  |
| H-abstraction to cyc1enyl |  | 2.10085e-13 (0.0564 ) | 2.10053e-13 (0.0564 ) |

| species                       | PYtrue      | Cumul    | PYeffective | Cumul    |
|-------------------------------|-------------|----------|-------------|----------|
| Indene+H                      | 0.685475    | 0.685475 | 0.685562    | 0.685562 |
| Benzene+cycloprop-2-enylidene | 0.175315    | 0.860791 | 0.175337    | 0.860900 |
| PhCHCCH2+H                    | 0.0707864   | 0.931577 | 0.0707953   | 0.931695 |
| Benzene+cycloprop-1-enylidene | 0.0563801   | 0.987957 | 0.0563786   | 0.988073 |
| Ph+MeAc                       | 0.00232214  | 0.990279 | 0.00232243  | 0.990396 |
| C2H2+PhCH2                    | 0.00223859  | 0.992518 | 0.00223887  | 0.992635 |
| Ph+Allene                     | 0.00213011  | 0.994648 | 0.00213038  | 0.994765 |
| PhCH2CCH+H                    | 0.00114986  | 0.995798 | 0.00115001  | 0.995915 |
| PhCCCH3+H                     | 0.00102873  | 0.996826 | 0.00102886  | 0.996944 |
| rad67                         | 0.000826665 | 0.997653 | 0.000826774 | 0.997771 |
| PhCCH+CH3                     | 0.000657642 | 0.998311 | 0.000657725 | 0.998428 |
| rad9                          | 0.000423771 | 0.998734 | 0.000423824 | 0.998852 |
| PhcycC3H3_A+H                 | 0.000350079 | 0.999085 | 0.000350122 | 0.999202 |
| rad35                         | 0.000297561 | 0.999382 | 0.000297599 | 0.999500 |
| PhcycC3H3_B+H                 | 0.000266382 | 0.999649 | 0.000266416 | 0.999766 |
| Phenyl+cycC3H4                | 0.000117515 | 0.999766 | 0.000000    | 0.999766 |
| PAH7+H                        | 6.20798e-05 | 0.999828 | 6.20876e-05 | 0.999828 |
| rad37                         | 5.65407e-05 | 0.999885 | 5.65479e-05 | 0.999885 |
| PAH10+CH3                     | 5.17502e-05 | 0.999936 | 5.17567e-05 | 0.999937 |
| PAH9+H                        | 1.32652e-05 | 0.999950 | 1.32669e-05 | 0.999950 |
| rad38                         | 1.20846e-05 | 0.999962 | 1.20861e-05 | 0.999962 |
| rad39                         | 1.08954e-05 | 0.999973 | 1.08968e-05 | 0.999973 |
| rad30                         | 1.06873e-05 | 0.999983 | 1.06888e-05 | 0.999984 |
| PAH3+H                        | 7.66117e-06 | 0.999991 | 7.66214e-06 | 0.999991 |
| rad46                         | 1.67966e-06 | 0.999993 | 1.67987e-06 | 0.999993 |
| rad50                         | 1.02619e-06 | 0.999994 | 1.02632e-06 | 0.999994 |
| rad54                         | 8.14180e-07 | 0.999995 | 8.14281e-07 | 0.999995 |
| rad60syn                      | 8.13512e-07 | 0.999995 | 8.13613e-07 | 0.999996 |
| rad59                         | 8.02878e-07 | 0.999996 | 8.02980e-07 | 0.999997 |
| rad12                         | 7.13976e-07 | 0.999997 | 7.14066e-07 | 0.999997 |
| PAH1+H                        | 6.94743e-07 | 0.999998 | 6.94830e-07 | 0.999998 |
| rad60anti                     | 4.97404e-07 | 0.999998 | 4.97467e-07 | 0.999998 |
| rad15                         | 4.00609e-07 | 0.999998 | 4.00660e-07 | 0.999999 |
| rad43                         | 2.62106e-07 | 0.999999 | 2.62139e-07 | 0.999999 |
| rad51                         | 2.28409e-07 | 0.999999 | 2.28438e-07 | 0.999999 |
| rad70                         | 2.10427e-07 | 0.999999 | 2.10454e-07 | 1.000000 |
| rad6                          | 1.14398e-07 | 0.999999 | 1.14412e-07 | 1.000000 |
| rad52                         | 7.78600e-08 | 0.999999 | 7.78694e-08 | 1.000000 |
| rad23                         | 5.76789e-08 | 0.999999 | 5.76862e-08 | 1.000000 |
| rad58                         | 5.45987e-08 | 0.999999 | 5.46056e-08 | 1.000000 |
| rad55                         | 5.25976e-08 | 0.999999 | 5.26042e-08 | 1.000000 |
| rad34                         | 4.48144e-08 | 1.000000 | 4.48200e-08 | 1.000000 |
| rad61                         | 4.13220e-08 | 1.000000 | 4.13272e-08 | 1.000000 |
| rad45                         | 2.69846e-08 | 1.000000 | 2.69880e-08 | 1.000000 |
| rad62                         | 2.21412e-08 | 1.000000 | 2.21439e-08 | 1.000000 |
| rad19anti                     | 1.95811e-08 | 1.000000 | 1.95836e-08 | 1.000000 |
| rad2                          | 1.52080e-08 | 1.000000 | 1.52099e-08 | 1.000000 |
| rad41                         | 1.24967e-08 | 1.000000 | 1.24983e-08 | 1.000000 |
| rad53                         | 8.55938e-09 | 1.000000 | 8.56045e-09 | 1.000000 |
| rad56                         | 6.83205e-09 | 1.000000 | 6.83291e-09 | 1.000000 |
| rad65                         | 6.72435e-09 | 1.000000 | 6.72520e-09 | 1.000000 |
| PAH8+H                        | 6.66487e-09 | 1.000000 | 6.66571e-09 | 1.000000 |
| rad71                         | 4.17963e-09 | 1.000000 | 4.18016e-09 | 1.000000 |
| rad1                          | 4.17724e-09 | 1.000000 | 4.17778e-09 | 1.000000 |
| rad73                         | 3.32233e-09 | 1.000000 | 3.32275e-09 | 1.000000 |
| rad64                         | 2.96495e-09 | 1.000000 | 2.96532e-09 | 1.000000 |
| rad36                         | 2.64227e-09 | 1.000000 | 2.64260e-09 | 1.000000 |
| rad8                          | 2.59178e-09 | 1.000000 | 2.59211e-09 | 1.000000 |
| rad11                         | 2.44604e-09 | 1.000000 | 2.44635e-09 | 1.000000 |
| rad21                         | 2.15517e-09 | 1.000000 | 2.15544e-09 | 1.000000 |
| rad68syn                      | 1.89542e-09 | 1.000000 | 1.89566e-09 | 1.000000 |
| rad13                         | 1.45973e-09 | 1.000000 | 1.45991e-09 | 1.000000 |
| rad10                         | 1.35178e-09 | 1.000000 | 1.35195e-09 | 1.000000 |
| rad68anti                     | 1.24279e-09 | 1.000000 | 1.24295e-09 | 1.000000 |
| rad40syn                      | 1.18580e-09 | 1.000000 | 1.18595e-09 | 1.000000 |
| rad42                         | 1.17207e-09 | 1.000000 | 1.17222e-09 | 1.000000 |
| rad19syn                      | 1.13955e-09 | 1.000000 | 1.13970e-09 | 1.000000 |
| rad40anti                     | 9.26552e-10 | 1.000000 | 9.26666e-10 | 1.000000 |
| rad22                         | 8.74369e-10 | 1.000000 | 8.74476e-10 | 1.000000 |
| rad7                          | 6.25171e-10 | 1.000000 | 6.25250e-10 | 1.000000 |
| rad20                         | 6.22252e-10 | 1.000000 | 6.22330e-10 | 1.000000 |
| rad26                         | 3.36020e-10 | 1.000000 | 3.36063e-10 | 1.000000 |
| rad28                         | 1.87464e-10 | 1.000000 | 1.87488e-10 | 1.000000 |

|       |             |          |             |          |
|-------|-------------|----------|-------------|----------|
| rad33 | 1.52362e-10 | 1.000000 | 1.52381e-10 | 1.000000 |
| rad3  | 1.34221e-10 | 1.000000 | 1.34238e-10 | 1.000000 |
| rad72 | 1.21007e-10 | 1.000000 | 1.21022e-10 | 1.000000 |
| rad24 | 1.19800e-10 | 1.000000 | 1.19815e-10 | 1.000000 |
| rad4  | 1.07298e-10 | 1.000000 | 1.07312e-10 | 1.000000 |
| rad18 | 9.86096e-11 | 1.000000 | 9.86216e-11 | 1.000000 |
| rad25 | 3.17179e-11 | 1.000000 | 3.17219e-11 | 1.000000 |
| rad27 | 1.67334e-11 | 1.000000 | 1.67355e-11 | 1.000000 |
| rad31 | 2.56581e-12 | 1.000000 | 2.56613e-12 | 1.000000 |
| rad14 | 1.67396e-12 | 1.000000 | 1.67417e-12 | 1.000000 |
| rad47 | 2.15269e-13 | 1.000000 | 2.15296e-13 | 1.000000 |
| rad5  | 2.77456e-15 | 1.000000 | 2.77492e-15 | 1.000000 |

100.000000 Pa, 1300.00000 K

| Rate constant             | True (fraction)       | Effective (fraction)  |
|---------------------------|-----------------------|-----------------------|
| Total                     | 4.84401e-12 (1.00 )   | 4.84262e-12 (1.00 )   |
| Formation of rad19        | 3.55537e-12 (0.734 )  | 3.55411e-12 (0.734 )  |
| H-abstraction to cyc2enyl | 9.48893e-13 (0.196 )  | 9.48893e-13 (0.196 )  |
| H-abstraction to cyclenyl | 3.39740e-13 (0.0701 ) | 3.39620e-13 (0.0701 ) |

| species                       | PYtrue      | Cumul    | PYeffective | Cumul    |
|-------------------------------|-------------|----------|-------------|----------|
| Indene+H                      | 0.625983    | 0.625983 | 0.626161    | 0.626161 |
| Benzene+cycloprop-2-enylidene | 0.195890    | 0.821873 | 0.195946    | 0.822108 |
| PhCHCCH2+H                    | 0.0916344   | 0.913507 | 0.0916603   | 0.913768 |
| Benzene+cycloprop-1-enylidene | 0.0701362   | 0.983643 | 0.0701313   | 0.983899 |
| Ph+MeAc                       | 0.00307259  | 0.986716 | 0.00307347  | 0.986973 |
| C2H2+PhCH2                    | 0.00293093  | 0.989647 | 0.00293176  | 0.989904 |
| Ph+Allene                     | 0.00291339  | 0.992560 | 0.00291422  | 0.992819 |
| PhCH2CCH+H                    | 0.00168032  | 0.994241 | 0.00168080  | 0.994499 |
| PhCCCH3+H                     | 0.00131074  | 0.995551 | 0.00131112  | 0.995811 |
| rad67                         | 0.00112065  | 0.996672 | 0.00112097  | 0.996932 |
| PhCCH+CH3                     | 0.000816414 | 0.997488 | 0.000816643 | 0.997748 |
| PhcycC3H3_A+H                 | 0.000676309 | 0.998165 | 0.000676502 | 0.998425 |
| PhcycC3H3_B+H                 | 0.000564762 | 0.998730 | 0.000564923 | 0.998990 |
| rad35                         | 0.000403023 | 0.999133 | 0.000403139 | 0.999393 |
| rad9                          | 0.000266192 | 0.999399 | 0.000266269 | 0.999659 |
| Phenyl+cycC3H4                | 0.000260508 | 0.999659 | 0.000000    | 0.999659 |
| PAH10+CH3                     | 8.60951e-05 | 0.999745 | 8.61192e-05 | 0.999745 |
| PAH7+H                        | 7.95701e-05 | 0.999825 | 7.95932e-05 | 0.999825 |
| rad37                         | 7.91847e-05 | 0.999904 | 7.92071e-05 | 0.999904 |
| PAH9+H                        | 2.15095e-05 | 0.999926 | 2.15157e-05 | 0.999925 |
| rad38                         | 1.93122e-05 | 0.999945 | 1.93178e-05 | 0.999945 |
| rad30                         | 1.51440e-05 | 0.999960 | 1.51484e-05 | 0.999960 |
| rad39                         | 1.34510e-05 | 0.999973 | 1.34549e-05 | 0.999973 |
| PAH3+H                        | 1.30532e-05 | 0.999987 | 1.30570e-05 | 0.999986 |
| rad46                         | 2.85483e-06 | 0.999989 | 2.85565e-06 | 0.999989 |
| rad50                         | 1.89414e-06 | 0.999991 | 1.89469e-06 | 0.999991 |
| rad59                         | 1.33911e-06 | 0.999993 | 1.33950e-06 | 0.999993 |
| rad60syn                      | 1.27719e-06 | 0.999994 | 1.27755e-06 | 0.999994 |
| rad54                         | 1.25031e-06 | 0.999995 | 1.25067e-06 | 0.999995 |
| PAH1+H                        | 1.23302e-06 | 0.999996 | 1.23338e-06 | 0.999996 |
| rad60anti                     | 7.85836e-07 | 0.999997 | 7.86060e-07 | 0.999997 |
| rad12                         | 5.90620e-07 | 0.999998 | 5.90789e-07 | 0.999998 |
| rad15                         | 5.44291e-07 | 0.999998 | 5.44447e-07 | 0.999998 |
| rad51                         | 4.33198e-07 | 0.999999 | 4.33321e-07 | 0.999999 |
| rad43                         | 4.20368e-07 | 0.999999 | 4.20488e-07 | 0.999999 |
| rad70                         | 3.55032e-07 | 1.000000 | 3.55133e-07 | 0.999999 |
| rad52                         | 1.46336e-07 | 1.000000 | 1.46378e-07 | 1.000000 |
| rad6                          | 1.02476e-07 | 1.000000 | 1.02505e-07 | 1.000000 |
| rad58                         | 1.00924e-07 | 1.000000 | 1.00953e-07 | 1.000000 |
| rad55                         | 8.38154e-08 | 1.000000 | 8.38389e-08 | 1.000000 |
| rad61                         | 7.97455e-08 | 1.000000 | 7.97678e-08 | 1.000000 |
| rad34                         | 7.88170e-08 | 1.000000 | 7.88402e-08 | 1.000000 |
| rad23                         | 5.52129e-08 | 1.000000 | 5.52287e-08 | 1.000000 |
| rad62                         | 3.29336e-08 | 1.000000 | 3.29430e-08 | 1.000000 |
| rad45                         | 2.53145e-08 | 1.000000 | 2.53218e-08 | 1.000000 |
| rad41                         | 2.22950e-08 | 1.000000 | 2.23013e-08 | 1.000000 |
| rad53                         | 1.55059e-08 | 1.000000 | 1.55103e-08 | 1.000000 |
| rad19anti                     | 1.49877e-08 | 1.000000 | 1.49921e-08 | 1.000000 |
| rad56                         | 1.30550e-08 | 1.000000 | 1.30587e-08 | 1.000000 |
| PAH8+H                        | 1.29157e-08 | 1.000000 | 1.29193e-08 | 1.000000 |
| rad65                         | 1.27739e-08 | 1.000000 | 1.27775e-08 | 1.000000 |
| rad2                          | 1.12858e-08 | 1.000000 | 1.12890e-08 | 1.000000 |
| rad11                         | 9.26539e-09 | 1.000000 | 9.26805e-09 | 1.000000 |
| rad71                         | 6.74004e-09 | 1.000000 | 6.74196e-09 | 1.000000 |
| rad73                         | 5.73979e-09 | 1.000000 | 5.74143e-09 | 1.000000 |
| rad64                         | 5.26356e-09 | 1.000000 | 5.26507e-09 | 1.000000 |

|           |             |         |             |         |
|-----------|-------------|---------|-------------|---------|
| rad8      | 4.48245e-09 | 1.00000 | 4.48372e-09 | 1.00000 |
| rad68syn  | 3.66168e-09 | 1.00000 | 3.66273e-09 | 1.00000 |
| rad1      | 3.12580e-09 | 1.00000 | 3.12669e-09 | 1.00000 |
| rad21     | 3.12439e-09 | 1.00000 | 3.12529e-09 | 1.00000 |
| rad36     | 2.49056e-09 | 1.00000 | 2.49127e-09 | 1.00000 |
| rad13     | 2.43900e-09 | 1.00000 | 2.43970e-09 | 1.00000 |
| rad68anti | 2.39934e-09 | 1.00000 | 2.40002e-09 | 1.00000 |
| rad10     | 2.38235e-09 | 1.00000 | 2.38303e-09 | 1.00000 |
| rad40syn  | 2.31490e-09 | 1.00000 | 2.31556e-09 | 1.00000 |
| rad7      | 2.16949e-09 | 1.00000 | 2.17011e-09 | 1.00000 |
| rad42     | 1.93789e-09 | 1.00000 | 1.93844e-09 | 1.00000 |
| rad40anti | 1.80803e-09 | 1.00000 | 1.80854e-09 | 1.00000 |
| rad22     | 1.17321e-09 | 1.00000 | 1.17354e-09 | 1.00000 |
| rad19syn  | 1.00706e-09 | 1.00000 | 1.00735e-09 | 1.00000 |
| rad20     | 8.22726e-10 | 1.00000 | 8.22962e-10 | 1.00000 |
| rad26     | 3.65445e-10 | 1.00000 | 3.65549e-10 | 1.00000 |
| rad18     | 2.96155e-10 | 1.00000 | 2.96240e-10 | 1.00000 |
| rad33     | 1.78770e-10 | 1.00000 | 1.78821e-10 | 1.00000 |
| rad28     | 1.63265e-10 | 1.00000 | 1.63312e-10 | 1.00000 |
| rad72     | 1.63114e-10 | 1.00000 | 1.63161e-10 | 1.00000 |
| rad24     | 1.54382e-10 | 1.00000 | 1.54426e-10 | 1.00000 |
| rad3      | 9.47942e-11 | 1.00000 | 9.48213e-11 | 1.00000 |
| rad4      | 7.55472e-11 | 1.00000 | 7.55691e-11 | 1.00000 |
| rad25     | 5.94602e-11 | 1.00000 | 5.94771e-11 | 1.00000 |
| rad27     | 2.85795e-11 | 1.00000 | 2.85876e-11 | 1.00000 |
| rad14     | 2.72646e-12 | 1.00000 | 2.72723e-12 | 1.00000 |
| rad31     | 2.63071e-12 | 1.00000 | 2.63146e-12 | 1.00000 |
| rad47     | 3.87211e-13 | 1.00000 | 3.87322e-13 | 1.00000 |
| rad5      | 1.13806e-14 | 1.00000 | 1.13839e-14 | 1.00000 |

100.000000 Pa, 1400.00000 K

| Rate constant                 | True (fraction)       | Effective (fraction)  |             |          |
|-------------------------------|-----------------------|-----------------------|-------------|----------|
| Total                         | 6.19360e-12 (1.00 )   | 6.18997e-12 (1.00 )   |             |          |
| Formation of rad19            | 4.34185e-12 (0.701 )  | 4.33861e-12 (0.701 )  |             |          |
| H-abstraction to cyc2enyl     | 1.32990e-12 (0.215 )  | 1.32990e-12 (0.215 )  |             |          |
| H-abstraction to cyclenyl     | 5.21850e-13 (0.0843 ) | 5.21461e-13 (0.0842 ) |             |          |
| species                       | PYtrue                | Cumul                 | PYeffective | Cumul    |
| Indene+H                      | 0.565386              | 0.565386              | 0.565718    | 0.565718 |
| Benzene+cycloprop-2-enylidene | 0.214721              | 0.780108              | 0.214847    | 0.780566 |
| PhCHCCH2+H                    | 0.113917              | 0.894025              | 0.113983    | 0.894549 |
| Benzene+cycloprop-1-enylidene | 0.0842564             | 0.978281              | 0.0842429   | 0.978792 |
| Ph+MeAc                       | 0.00388756            | 0.982168              | 0.00388984  | 0.982682 |
| Ph+Allene                     | 0.00377533            | 0.985944              | 0.00377754  | 0.986459 |
| C2H2+PhCH2                    | 0.00369364            | 0.989637              | 0.00369581  | 0.990155 |
| PhCH2CCH+H                    | 0.00232736            | 0.991965              | 0.00232872  | 0.992484 |
| PhCCCH3+H                     | 0.00160100            | 0.993566              | 0.00160194  | 0.994086 |
| rad67                         | 0.00145042            | 0.995016              | 0.00145127  | 0.995537 |
| PhcycC3H3_A+H                 | 0.00120667            | 0.996223              | 0.00120738  | 0.996744 |
| PhcycC3H3_B+H                 | 0.00109392            | 0.997317              | 0.00109456  | 0.997839 |
| PhCCH+CH3                     | 0.000992374           | 0.998309              | 0.000992951 | 0.998832 |
| Phenyl+cycC3H4                | 0.000523345           | 0.998833              | 0.00000     | 0.998832 |
| rad35                         | 0.000521721           | 0.999354              | 0.000522027 | 0.999354 |
| rad9                          | 0.000166530           | 0.999521              | 0.000166627 | 0.999521 |
| PAH10+CH3                     | 0.000134288           | 0.999655              | 0.000134367 | 0.999655 |
| rad37                         | 0.000104403           | 0.999759              | 0.000104464 | 0.999759 |
| PAH7+H                        | 9.80022e-05           | 0.999857              | 9.80601e-05 | 0.999857 |
| PAH9+H                        | 3.34327e-05           | 0.999891              | 3.34523e-05 | 0.999891 |
| rad38                         | 2.92758e-05           | 0.999920              | 2.92930e-05 | 0.999920 |
| PAH3+H                        | 2.12666e-05           | 0.999941              | 2.12790e-05 | 0.999941 |
| rad30                         | 2.04635e-05           | 0.999962              | 2.04755e-05 | 0.999962 |
| rad39                         | 1.60930e-05           | 0.999978              | 1.61025e-05 | 0.999978 |
| rad46                         | 4.67432e-06           | 0.999983              | 4.67706e-06 | 0.999983 |
| rad50                         | 3.47855e-06           | 0.999986              | 3.48059e-06 | 0.999986 |
| rad59                         | 2.12823e-06           | 0.999988              | 2.12948e-06 | 0.999988 |
| PAH1+H                        | 2.08335e-06           | 0.999990              | 2.08458e-06 | 0.999990 |
| rad60syn                      | 1.90733e-06           | 0.999992              | 1.90845e-06 | 0.999992 |
| rad54                         | 1.79199e-06           | 0.999994              | 1.79304e-06 | 0.999994 |
| rad60anti                     | 1.18101e-06           | 0.999995              | 1.18170e-06 | 0.999995 |
| rad51                         | 8.56334e-07           | 0.999996              | 8.56841e-07 | 0.999996 |
| rad15                         | 8.40736e-07           | 0.999997              | 8.41225e-07 | 0.999997 |
| rad43                         | 6.37834e-07           | 0.999998              | 6.38208e-07 | 0.999998 |
| rad70                         | 5.66983e-07           | 0.999998              | 5.67316e-07 | 0.999998 |
| rad12                         | 4.69852e-07           | 0.999999              | 4.70128e-07 | 0.999999 |
| rad52                         | 2.78750e-07           | 0.999999              | 2.78914e-07 | 0.999999 |
| rad58                         | 1.82181e-07           | 0.999999              | 1.82288e-07 | 0.999999 |
| rad61                         | 1.49518e-07           | 0.999999              | 1.49606e-07 | 0.999999 |



|           |             |          |             |          |
|-----------|-------------|----------|-------------|----------|
| rad34     | 1.31988e-07 | 0.999999 | 1.32065e-07 | 0.999999 |
| rad55     | 1.24495e-07 | 1.000000 | 1.24568e-07 | 1.000000 |
| rad6      | 1.10215e-07 | 1.000000 | 1.10280e-07 | 1.000000 |
| rad23     | 5.57768e-08 | 1.000000 | 5.58095e-08 | 1.000000 |
| rad62     | 4.64814e-08 | 1.000000 | 4.65087e-08 | 1.000000 |
| rad41     | 3.79911e-08 | 1.000000 | 3.80134e-08 | 1.000000 |
| PAH8+H    | 2.74098e-08 | 1.000000 | 2.74259e-08 | 1.000000 |
| rad53     | 2.63972e-08 | 1.000000 | 2.64127e-08 | 1.000000 |
| rad65     | 2.50415e-08 | 1.000000 | 2.50561e-08 | 1.000000 |
| rad56     | 2.37749e-08 | 1.000000 | 2.37889e-08 | 1.000000 |
| rad45     | 2.32456e-08 | 1.000000 | 2.32592e-08 | 1.000000 |
| rad11     | 1.92544e-08 | 1.000000 | 1.92657e-08 | 1.000000 |
| rad71     | 1.54491e-08 | 1.000000 | 1.54581e-08 | 1.000000 |
| rad73     | 1.29301e-08 | 1.000000 | 1.29377e-08 | 1.000000 |
| rad19anti | 1.16241e-08 | 1.000000 | 1.16309e-08 | 1.000000 |
| rad64     | 8.94399e-09 | 1.000000 | 8.94929e-09 | 1.000000 |
| rad2      | 8.37231e-09 | 1.000000 | 8.37721e-09 | 1.000000 |
| rad68syn  | 7.08965e-09 | 1.000000 | 7.09384e-09 | 1.000000 |
| rad7      | 5.81938e-09 | 1.000000 | 5.82279e-09 | 1.000000 |
| rad8      | 5.72296e-09 | 1.000000 | 5.72632e-09 | 1.000000 |
| rad10     | 4.86289e-09 | 1.000000 | 4.86574e-09 | 1.000000 |
| rad40syn  | 4.73693e-09 | 1.000000 | 4.73971e-09 | 1.000000 |
| rad68anti | 4.63711e-09 | 1.000000 | 4.63983e-09 | 1.000000 |
| rad21     | 3.75199e-09 | 1.000000 | 3.75419e-09 | 1.000000 |
| rad40anti | 3.71855e-09 | 1.000000 | 3.72074e-09 | 1.000000 |
| rad42     | 3.04174e-09 | 1.000000 | 3.04352e-09 | 1.000000 |
| rad13     | 2.75887e-09 | 1.000000 | 2.76049e-09 | 1.000000 |
| rad1      | 2.34159e-09 | 1.000000 | 2.34297e-09 | 1.000000 |
| rad36     | 2.30194e-09 | 1.000000 | 2.30330e-09 | 1.000000 |
| rad22     | 1.44175e-09 | 1.000000 | 1.44260e-09 | 1.000000 |
| rad20     | 9.04256e-10 | 1.000000 | 9.04784e-10 | 1.000000 |
| rad19syn  | 8.90593e-10 | 1.000000 | 8.91116e-10 | 1.000000 |
| rad18     | 7.28615e-10 | 1.000000 | 7.29037e-10 | 1.000000 |
| rad26     | 6.14621e-10 | 1.000000 | 6.14981e-10 | 1.000000 |
| rad72     | 3.74450e-10 | 1.000000 | 3.74670e-10 | 1.000000 |
| rad24     | 1.80885e-10 | 1.000000 | 1.80991e-10 | 1.000000 |
| rad28     | 1.79282e-10 | 1.000000 | 1.79387e-10 | 1.000000 |
| rad33     | 1.74257e-10 | 1.000000 | 1.74359e-10 | 1.000000 |
| rad25     | 7.97869e-11 | 1.000000 | 7.98336e-11 | 1.000000 |
| rad3      | 6.73241e-11 | 1.000000 | 6.73635e-11 | 1.000000 |
| rad4      | 5.33828e-11 | 1.000000 | 5.34141e-11 | 1.000000 |
| rad27     | 3.63544e-11 | 1.000000 | 3.63758e-11 | 1.000000 |
| rad14     | 3.27070e-12 | 1.000000 | 3.27262e-12 | 1.000000 |
| rad31     | 2.62724e-12 | 1.000000 | 2.62878e-12 | 1.000000 |
| rad47     | 7.43294e-13 | 1.000000 | 7.43736e-13 | 1.000000 |
| rad5      | 1.05135e-13 | 1.000000 | 1.05197e-13 | 1.000000 |

100.000000 Pa, 1500.00000 K

=====

| Rate constant             | True (fraction)       | Effective (fraction)  |
|---------------------------|-----------------------|-----------------------|
| Total                     | 7.80417e-12 (1.00 )   | 7.79561e-12 (1.00 )   |
| Formation of rad19        | 5.22661e-12 (0.670 )  | 5.21915e-12 (0.669 )  |
| H-abstraction to cyc2enyl | 1.80920e-12 (0.232 )  | 1.80920e-12 (0.232 )  |
| H-abstraction to cyc1enyl | 7.68359e-13 (0.0985 ) | 7.67262e-13 (0.0984 ) |

| species                       | PYtrue      | Cumul    | PYeffective | Cumul    |
|-------------------------------|-------------|----------|-------------|----------|
| Indene+H                      | 0.505541    | 0.505541 | 0.506096    | 0.506096 |
| Benzene+cycloprop-2-enylidene | 0.231825    | 0.737366 | 0.232079    | 0.738175 |
| PhCHCCH2+H                    | 0.136149    | 0.873515 | 0.136298    | 0.874474 |
| Benzene+cycloprop-1-enylidene | 0.0984549   | 0.971970 | 0.0984223   | 0.972896 |
| Ph+MeAc                       | 0.00471268  | 0.976682 | 0.00471785  | 0.977614 |
| Ph+Allene                     | 0.00465464  | 0.981337 | 0.00465974  | 0.982274 |
| C2H2+PhCH2                    | 0.00447993  | 0.985817 | 0.00448485  | 0.986758 |
| PhCH2CCH+H                    | 0.00305565  | 0.988872 | 0.00305900  | 0.989817 |
| PhcycC3H3_A+H                 | 0.00199081  | 0.990863 | 0.00199300  | 0.991810 |
| PhcycC3H3_B+H                 | 0.00193404  | 0.992797 | 0.00193617  | 0.993747 |
| PhCCCH3+H                     | 0.00187870  | 0.994676 | 0.00188076  | 0.995627 |
| rad67                         | 0.00179407  | 0.996470 | 0.00179604  | 0.997423 |
| PhCCH+CH3                     | 0.00117966  | 0.997650 | 0.00118095  | 0.998604 |
| Phenyl+cycC3H4                | 0.000956146 | 0.998606 | 0.000000    | 0.998604 |
| rad35                         | 0.000645983 | 0.999252 | 0.000646692 | 0.999251 |
| PAH10+CH3                     | 0.000194941 | 0.999447 | 0.000195155 | 0.999446 |
| rad37                         | 0.000130011 | 0.999577 | 0.000130154 | 0.999576 |
| PAH7+H                        | 0.000116574 | 0.999693 | 0.000116702 | 0.999693 |
| rad9                          | 0.000104467 | 0.999798 | 0.000104582 | 0.999798 |
| PAH9+H                        | 4.90650e-05 | 0.999847 | 4.91188e-05 | 0.999847 |
| rad38                         | 4.17580e-05 | 0.999889 | 4.18039e-05 | 0.999889 |
| PAH3+H                        | 3.25042e-05 | 0.999921 | 3.25399e-05 | 0.999921 |

|           |             |          |             |          |
|-----------|-------------|----------|-------------|----------|
| rad30     | 2.63402e-05 | 0.999947 | 2.63691e-05 | 0.999948 |
| rad39     | 1.88190e-05 | 0.999966 | 1.88396e-05 | 0.999966 |
| rad46     | 7.20117e-06 | 0.999974 | 7.20902e-06 | 0.999974 |
| rad50     | 5.98940e-06 | 0.999980 | 5.99597e-06 | 0.999980 |
| PAH1+H    | 3.27547e-06 | 0.999983 | 3.27906e-06 | 0.999983 |
| rad59     | 3.17632e-06 | 0.999986 | 3.17980e-06 | 0.999986 |
| rad60syn  | 2.68948e-06 | 0.999989 | 2.69243e-06 | 0.999989 |
| rad54     | 2.40433e-06 | 0.999991 | 2.40697e-06 | 0.999991 |
| rad60anti | 1.67493e-06 | 0.999993 | 1.67677e-06 | 0.999993 |
| rad51     | 1.59135e-06 | 0.999994 | 1.59310e-06 | 0.999994 |
| rad15     | 1.14771e-06 | 0.999995 | 1.14897e-06 | 0.999996 |
| rad43     | 9.08924e-07 | 0.999996 | 9.09922e-07 | 0.999996 |
| rad70     | 8.46600e-07 | 0.999997 | 8.47531e-07 | 0.999997 |
| rad52     | 4.97821e-07 | 0.999998 | 4.98367e-07 | 0.999998 |
| rad12     | 3.67179e-07 | 0.999998 | 3.67582e-07 | 0.999998 |
| rad58     | 3.06683e-07 | 0.999998 | 3.07020e-07 | 0.999998 |
| rad61     | 2.58085e-07 | 0.999999 | 2.58368e-07 | 0.999999 |
| rad34     | 2.06053e-07 | 0.999999 | 2.06280e-07 | 0.999999 |
| rad55     | 1.72523e-07 | 0.999999 | 1.72712e-07 | 0.999999 |
| rad6      | 1.33473e-07 | 0.999999 | 1.33620e-07 | 0.999999 |
| rad62     | 6.22353e-08 | 0.999999 | 6.23037e-08 | 0.999999 |
| rad41     | 6.02501e-08 | 0.999999 | 6.03163e-08 | 0.999999 |
| rad23     | 5.85457e-08 | 0.999999 | 5.86100e-08 | 0.999999 |
| PAH8+H    | 5.45407e-08 | 0.999999 | 5.46005e-08 | 0.999999 |
| rad65     | 4.60424e-08 | 0.999999 | 4.60930e-08 | 1.000000 |
| rad53     | 4.15017e-08 | 0.999999 | 4.15473e-08 | 1.000000 |
| rad56     | 3.98265e-08 | 1.000000 | 3.98702e-08 | 1.000000 |
| rad71     | 3.58319e-08 | 1.000000 | 3.58713e-08 | 1.000000 |
| rad73     | 2.86417e-08 | 1.000000 | 2.86731e-08 | 1.000000 |
| rad11     | 2.64542e-08 | 1.000000 | 2.64832e-08 | 1.000000 |
| rad45     | 2.09726e-08 | 1.000000 | 2.09956e-08 | 1.000000 |
| rad64     | 1.42130e-08 | 1.000000 | 1.42286e-08 | 1.000000 |
| rad68syn  | 1.27477e-08 | 1.000000 | 1.27616e-08 | 1.000000 |
| rad7      | 9.57251e-09 | 1.000000 | 9.58300e-09 | 1.000000 |
| rad19anti | 9.13338e-09 | 1.000000 | 9.14341e-09 | 1.000000 |
| rad40syn  | 9.03325e-09 | 1.000000 | 9.04318e-09 | 1.000000 |
| rad68anti | 8.32221e-09 | 1.000000 | 8.33137e-09 | 1.000000 |
| rad10     | 7.92118e-09 | 1.000000 | 7.92987e-09 | 1.000000 |
| rad40anti | 7.13212e-09 | 1.000000 | 7.13993e-09 | 1.000000 |
| rad8      | 6.29780e-09 | 1.000000 | 6.30472e-09 | 1.000000 |
| rad2      | 6.21708e-09 | 1.000000 | 6.22390e-09 | 1.000000 |
| rad42     | 4.48790e-09 | 1.000000 | 4.49282e-09 | 1.000000 |
| rad21     | 4.05054e-09 | 1.000000 | 4.05498e-09 | 1.000000 |
| rad13     | 2.54436e-09 | 1.000000 | 2.54716e-09 | 1.000000 |
| rad36     | 2.09170e-09 | 1.000000 | 2.09400e-09 | 1.000000 |
| rad1      | 1.75829e-09 | 1.000000 | 1.76022e-09 | 1.000000 |
| rad22     | 1.64581e-09 | 1.000000 | 1.64762e-09 | 1.000000 |
| rad26     | 1.57281e-09 | 1.000000 | 1.57454e-09 | 1.000000 |
| rad18     | 1.20563e-09 | 1.000000 | 1.20695e-09 | 1.000000 |
| rad72     | 9.50367e-10 | 1.000000 | 9.51411e-10 | 1.000000 |
| rad20     | 8.97767e-10 | 1.000000 | 8.98755e-10 | 1.000000 |
| rad19syn  | 7.89908e-10 | 1.000000 | 7.90771e-10 | 1.000000 |
| rad28     | 2.39697e-10 | 1.000000 | 2.39960e-10 | 1.000000 |
| rad24     | 1.99453e-10 | 1.000000 | 1.99673e-10 | 1.000000 |
| rad33     | 1.53584e-10 | 1.000000 | 1.53752e-10 | 1.000000 |
| rad25     | 8.89348e-11 | 1.000000 | 8.90319e-11 | 1.000000 |
| rad3      | 4.81221e-11 | 1.000000 | 4.81750e-11 | 1.000000 |
| rad27     | 3.91952e-11 | 1.000000 | 3.92382e-11 | 1.000000 |
| rad4      | 3.78898e-11 | 1.000000 | 3.79314e-11 | 1.000000 |
| rad14     | 3.31196e-12 | 1.000000 | 3.31560e-12 | 1.000000 |
| rad31     | 2.56264e-12 | 1.000000 | 2.56546e-12 | 1.000000 |
| rad47     | 1.34848e-12 | 1.000000 | 1.34995e-12 | 1.000000 |
| rad5      | 1.10634e-12 | 1.000000 | 1.10756e-12 | 1.000000 |

10.000000 Pa, 20.000000 K

=====

| Rate constant             | True (fraction)         | Effective (fraction)    |
|---------------------------|-------------------------|-------------------------|
| Total                     | 1.24541e-22 (1.00 )     | 1.24541e-22 (1.00 )     |
| Formation of rad19        | 1.24541e-22 (1.00 )     | 1.24541e-22 (1.00 )     |
| H-abstraction to cyc2enyl | 3.84323e-68 (3.09e-46)  | 3.84323e-68 (3.09e-46)  |
| H-abstraction to cyclenyl | 6.26313e-106 (5.03e-84) | 6.26313e-106 (5.03e-84) |

| species   | PYtrue      | Cumul    | PYeffective | Cumul    |
|-----------|-------------|----------|-------------|----------|
| Indene+H  | 0.768565    | 0.768565 | 0.768565    | 0.768565 |
| rad9      | 0.231071    | 0.999636 | 0.231071    | 0.999636 |
| rad15     | 0.000252722 | 0.999889 | 0.000252722 | 0.999889 |
| PhCHCH2+H | 0.000101218 | 0.999990 | 0.000101218 | 0.999990 |
| rad6      | 5.14452e-06 | 0.999995 | 5.14452e-06 | 0.999995 |

|                               |             |          |             |          |
|-------------------------------|-------------|----------|-------------|----------|
| rad2                          | 1.08434e-06 | 0.999996 | 1.08434e-06 | 0.999996 |
| PhCCH+CH3                     | 8.31406e-07 | 0.999997 | 8.31406e-07 | 0.999997 |
| PhCCCH3+H                     | 5.32005e-07 | 0.999998 | 5.32005e-07 | 0.999998 |
| C2H2+PhCH2                    | 4.46012e-07 | 0.999998 | 4.46012e-07 | 0.999998 |
| rad26                         | 4.32302e-07 | 0.999998 | 4.32302e-07 | 0.999998 |
| Ph+MeAc                       | 3.40157e-07 | 0.999999 | 3.40157e-07 | 0.999999 |
| rad67                         | 1.99187e-07 | 0.999999 | 1.99187e-07 | 0.999999 |
| rad10                         | 1.08317e-07 | 0.999999 | 1.08317e-07 | 0.999999 |
| rad35                         | 8.94503e-08 | 0.999999 | 8.94503e-08 | 0.999999 |
| rad1                          | 6.85077e-08 | 0.999999 | 6.85077e-08 | 0.999999 |
| rad23                         | 2.42664e-08 | 0.999999 | 2.42664e-08 | 0.999999 |
| rad3                          | 1.24709e-08 | 0.999999 | 1.24709e-08 | 0.999999 |
| rad4                          | 6.29921e-09 | 0.999999 | 6.29921e-09 | 0.999999 |
| Ph+Allene                     | 4.64813e-09 | 0.999999 | 4.64813e-09 | 0.999999 |
| rad7                          | 1.97307e-09 | 0.999999 | 1.97307e-09 | 0.999999 |
| rad28                         | 1.84421e-09 | 0.999999 | 1.84421e-09 | 0.999999 |
| rad45                         | 1.83076e-09 | 0.999999 | 1.83076e-09 | 0.999999 |
| rad30                         | 1.55934e-09 | 0.999999 | 1.55934e-09 | 0.999999 |
| rad12                         | 1.18563e-09 | 0.999999 | 1.18563e-09 | 0.999999 |
| rad11                         | 8.40789e-10 | 0.999999 | 8.40789e-10 | 0.999999 |
| PhCH2CCH+H                    | 7.59108e-10 | 0.999999 | 7.59108e-10 | 0.999999 |
| rad37                         | 4.93681e-10 | 0.999999 | 4.93681e-10 | 0.999999 |
| rad19anti                     | 3.81731e-10 | 0.999999 | 3.81731e-10 | 0.999999 |
| rad36                         | 1.12290e-10 | 0.999999 | 1.12290e-10 | 0.999999 |
| rad22                         | 5.56130e-11 | 0.999999 | 5.56130e-11 | 0.999999 |
| PAH9+H                        | 2.58270e-11 | 0.999999 | 2.58270e-11 | 0.999999 |
| PAH7+H                        | 1.74516e-11 | 0.999999 | 1.74516e-11 | 0.999999 |
| rad38                         | 1.04060e-11 | 0.999999 | 1.04060e-11 | 0.999999 |
| rad13                         | 6.65802e-12 | 0.999999 | 6.65802e-12 | 0.999999 |
| rad60syn                      | 6.04840e-12 | 0.999999 | 6.04840e-12 | 0.999999 |
| rad39                         | 3.99318e-12 | 0.999999 | 3.99318e-12 | 0.999999 |
| rad60anti                     | 2.92762e-12 | 0.999999 | 2.92762e-12 | 0.999999 |
| PAH3+H                        | 2.16857e-12 | 0.999999 | 2.16857e-12 | 0.999999 |
| rad14                         | 1.93922e-12 | 0.999999 | 1.93922e-12 | 0.999999 |
| rad27                         | 1.69896e-12 | 0.999999 | 1.69896e-12 | 0.999999 |
| rad5                          | 1.44356e-12 | 0.999999 | 1.44356e-12 | 0.999999 |
| rad46                         | 5.88502e-13 | 0.999999 | 5.88502e-13 | 0.999999 |
| rad59                         | 4.55607e-13 | 0.999999 | 4.55607e-13 | 0.999999 |
| PhcycC3H3_A+H                 | 4.02654e-13 | 0.999999 | 4.02654e-13 | 0.999999 |
| PAH10+CH3                     | 3.39579e-13 | 0.999999 | 3.39579e-13 | 0.999999 |
| rad43                         | 3.41592e-14 | 0.999999 | 3.41592e-14 | 0.999999 |
| rad18                         | 9.57970e-15 | 0.999999 | 9.57970e-15 | 0.999999 |
| rad33                         | 7.59059e-15 | 0.999999 | 7.59059e-15 | 0.999999 |
| rad25                         | 7.44669e-15 | 0.999999 | 7.44669e-15 | 0.999999 |
| rad62                         | 5.79363e-15 | 0.999999 | 5.79363e-15 | 0.999999 |
| rad50                         | 3.05279e-15 | 0.999999 | 3.05279e-15 | 0.999999 |
| rad20                         | 1.04113e-15 | 0.999999 | 1.04113e-15 | 0.999999 |
| rad21                         | 6.47056e-16 | 0.999999 | 6.47056e-16 | 0.999999 |
| rad54                         | 4.97427e-16 | 0.999999 | 4.97427e-16 | 0.999999 |
| rad70                         | 1.13717e-16 | 0.999999 | 1.13717e-16 | 0.999999 |
| Phenyl+cycC3H4                | 2.77348e-17 | 0.999999 | 0.00000     | 0.999999 |
| rad31                         | 2.10521e-17 | 0.999999 | 2.10521e-17 | 0.999999 |
| rad58                         | 1.93570e-17 | 0.999999 | 1.93570e-17 | 0.999999 |
| rad52                         | 1.69931e-17 | 0.999999 | 1.69931e-17 | 0.999999 |
| rad24                         | 1.54174e-17 | 0.999999 | 1.54174e-17 | 0.999999 |
| PAH1+H                        | 1.00638e-17 | 0.999999 | 1.00638e-17 | 0.999999 |
| rad51                         | 3.66673e-18 | 0.999999 | 3.66673e-18 | 0.999999 |
| rad55                         | 2.71782e-18 | 0.999999 | 2.71782e-18 | 0.999999 |
| rad34                         | 9.59299e-19 | 0.999999 | 9.59299e-19 | 0.999999 |
| rad41                         | 2.26872e-19 | 0.999999 | 2.26872e-19 | 0.999999 |
| rad42                         | 1.94374e-19 | 0.999999 | 1.94374e-19 | 0.999999 |
| rad65                         | 6.63260e-20 | 0.999999 | 6.63260e-20 | 0.999999 |
| PhcycC3H3_B+H                 | 2.70753e-22 | 0.999999 | 2.70753e-22 | 0.999999 |
| rad47                         | 1.51837e-24 | 0.999999 | 1.51837e-24 | 0.999999 |
| rad53                         | 1.17565e-26 | 0.999999 | 1.17565e-26 | 0.999999 |
| rad64                         | 1.04901e-28 | 0.999999 | 1.04901e-28 | 0.999999 |
| rad61                         | 4.81877e-31 | 0.999999 | 4.81877e-31 | 0.999999 |
| rad56                         | 2.74427e-34 | 0.999999 | 2.74427e-34 | 0.999999 |
| rad68syn                      | 1.09992e-35 | 0.999999 | 1.09992e-35 | 0.999999 |
| rad68anti                     | 9.07364e-36 | 0.999999 | 9.07364e-36 | 0.999999 |
| rad19syn                      | 1.37480e-38 | 0.999999 | 1.37480e-38 | 0.999999 |
| rad40syn                      | 1.39483e-41 | 0.999999 | 1.39483e-41 | 0.999999 |
| rad40anti                     | 1.11301e-41 | 0.999999 | 1.11301e-41 | 0.999999 |
| rad73                         | 4.46726e-42 | 0.999999 | 4.46726e-42 | 0.999999 |
| PAH8+H                        | 4.39649e-45 | 0.999999 | 4.39649e-45 | 0.999999 |
| Benzene+cycloprop-2-enylidene | 3.08591e-46 | 0.999999 | 3.08591e-46 | 0.999999 |
| rad71                         | 2.11107e-48 | 0.999999 | 2.11107e-48 | 0.999999 |
| rad8                          | 1.93505e-52 | 0.999999 | 1.93505e-52 | 0.999999 |
| Benzene+cycloprop-1-enylidene | 5.02895e-84 | 0.999999 | 5.02895e-84 | 0.999999 |

10.0000000 Pa, 30.0000000 K

| Rate constant             | True (fraction)        | Effective (fraction)   |
|---------------------------|------------------------|------------------------|
| Total                     | 8.13009e-20 (1.00 )    | 8.13009e-20 (1.00 )    |
| Formation of rad19        | 8.13009e-20 (1.00 )    | 8.13009e-20 (1.00 )    |
| H-abstraction to cyc2enyl | 1.08880e-49 (1.34e-30) | 1.08880e-49 (1.34e-30) |
| H-abstraction to cyclenyl | 7.55172e-75 (9.29e-56) | 7.55172e-75 (9.29e-56) |

| species        | PYtrue      | Cumul    | PYeffective | Cumul    |
|----------------|-------------|----------|-------------|----------|
| Indene+H       | 0.935094    | 0.935094 | 0.935094    | 0.935094 |
| rad9           | 0.0646853   | 0.999779 | 0.0646853   | 0.999779 |
| PhCHCCH2+H     | 0.000143862 | 0.999923 | 0.000143862 | 0.999923 |
| rad15          | 6.36827e-05 | 0.999987 | 6.36827e-05 | 0.999987 |
| rad6           | 7.39997e-06 | 0.999994 | 7.39997e-06 | 0.999994 |
| PhCCH+CH3      | 1.56971e-06 | 0.999996 | 1.56971e-06 | 0.999996 |
| PhCCCH3+H      | 1.00894e-06 | 0.999997 | 1.00894e-06 | 0.999997 |
| Ph+MeAc        | 6.66235e-07 | 0.999997 | 6.66235e-07 | 0.999997 |
| C2H2+PhCH2     | 6.64106e-07 | 0.999998 | 6.64106e-07 | 0.999998 |
| rad2           | 6.21510e-07 | 0.999999 | 6.21510e-07 | 0.999999 |
| rad26          | 3.90868e-07 | 0.999999 | 3.90868e-07 | 0.999999 |
| rad67          | 2.91059e-07 | 0.999999 | 2.91059e-07 | 0.999999 |
| rad35          | 1.30198e-07 | 1.000000 | 1.30198e-07 | 1.000000 |
| rad10          | 5.85454e-08 | 1.000000 | 5.85454e-08 | 1.000000 |
| rad1           | 3.92835e-08 | 1.000000 | 3.92835e-08 | 1.000000 |
| Ph+Allene      | 7.92370e-09 | 1.000000 | 7.92370e-09 | 1.000000 |
| rad3           | 6.69762e-09 | 1.000000 | 6.69762e-09 | 1.000000 |
| rad23          | 5.35852e-09 | 1.000000 | 5.35852e-09 | 1.000000 |
| rad28          | 4.59964e-09 | 1.000000 | 4.59964e-09 | 1.000000 |
| rad4           | 3.38328e-09 | 1.000000 | 3.38328e-09 | 1.000000 |
| rad7           | 2.41787e-09 | 1.000000 | 2.41787e-09 | 1.000000 |
| rad30          | 2.27077e-09 | 1.000000 | 2.27077e-09 | 1.000000 |
| rad37          | 1.26418e-09 | 1.000000 | 1.26418e-09 | 1.000000 |
| PhCH2CCH+H     | 1.26073e-09 | 1.000000 | 1.26073e-09 | 1.000000 |
| rad11          | 9.65912e-10 | 1.000000 | 9.65912e-10 | 1.000000 |
| rad45          | 3.33546e-10 | 1.000000 | 3.33546e-10 | 1.000000 |
| rad12          | 3.18826e-10 | 1.000000 | 3.18826e-10 | 1.000000 |
| PAH7+H         | 8.52605e-11 | 1.000000 | 8.52605e-11 | 1.000000 |
| rad19anti      | 8.41918e-11 | 1.000000 | 8.41918e-11 | 1.000000 |
| PAH9+H         | 4.56943e-11 | 1.000000 | 4.56943e-11 | 1.000000 |
| rad39          | 2.22139e-11 | 1.000000 | 2.22139e-11 | 1.000000 |
| rad36          | 2.04542e-11 | 1.000000 | 2.04542e-11 | 1.000000 |
| rad38          | 1.92691e-11 | 1.000000 | 1.92691e-11 | 1.000000 |
| rad22          | 1.81912e-11 | 1.000000 | 1.81912e-11 | 1.000000 |
| rad60syn       | 9.07873e-12 | 1.000000 | 9.07873e-12 | 1.000000 |
| rad13          | 7.80861e-12 | 1.000000 | 7.80861e-12 | 1.000000 |
| rad60anti      | 4.40458e-12 | 1.000000 | 4.40458e-12 | 1.000000 |
| PAH3+H         | 3.34655e-12 | 1.000000 | 3.34655e-12 | 1.000000 |
| rad46          | 1.06542e-12 | 1.000000 | 1.06542e-12 | 1.000000 |
| PAH10+CH3      | 9.51216e-13 | 1.000000 | 9.51216e-13 | 1.000000 |
| rad14          | 9.10032e-13 | 1.000000 | 9.10032e-13 | 1.000000 |
| rad27          | 8.10266e-13 | 1.000000 | 8.10266e-13 | 1.000000 |
| rad59          | 7.00719e-13 | 1.000000 | 7.00719e-13 | 1.000000 |
| PhcycC3H3_A+H  | 4.31863e-13 | 1.000000 | 4.31863e-13 | 1.000000 |
| rad5           | 2.08848e-13 | 1.000000 | 2.08848e-13 | 1.000000 |
| rad43          | 7.55417e-14 | 1.000000 | 7.55417e-14 | 1.000000 |
| rad62          | 1.30897e-14 | 1.000000 | 1.30897e-14 | 1.000000 |
| rad33          | 8.98080e-15 | 1.000000 | 8.98080e-15 | 1.000000 |
| rad25          | 7.67613e-15 | 1.000000 | 7.67613e-15 | 1.000000 |
| rad50          | 5.94477e-15 | 1.000000 | 5.94477e-15 | 1.000000 |
| rad18          | 3.31380e-15 | 1.000000 | 3.31380e-15 | 1.000000 |
| rad54          | 1.68204e-15 | 1.000000 | 1.68204e-15 | 1.000000 |
| rad20          | 3.19965e-16 | 1.000000 | 3.19965e-16 | 1.000000 |
| rad70          | 1.97833e-16 | 1.000000 | 1.97833e-16 | 1.000000 |
| rad21          | 1.97651e-16 | 1.000000 | 1.97651e-16 | 1.000000 |
| Phenyl+cycC3H4 | 5.25631e-17 | 1.000000 | 0.000000    | 1.000000 |
| rad52          | 3.43877e-17 | 1.000000 | 3.43877e-17 | 1.000000 |
| rad58          | 3.18745e-17 | 1.000000 | 3.18745e-17 | 1.000000 |
| PAH1+H         | 3.03775e-17 | 1.000000 | 3.03775e-17 | 1.000000 |
| rad31          | 1.19639e-17 | 1.000000 | 1.19639e-17 | 1.000000 |
| rad55          | 9.38719e-18 | 1.000000 | 9.38719e-18 | 1.000000 |
| rad51          | 7.68783e-18 | 1.000000 | 7.68783e-18 | 1.000000 |
| rad24          | 2.65857e-18 | 1.000000 | 2.65857e-18 | 1.000000 |
| rad34          | 1.71589e-18 | 1.000000 | 1.71589e-18 | 1.000000 |
| rad41          | 5.74247e-19 | 1.000000 | 5.74247e-19 | 1.000000 |
| rad42          | 4.97904e-19 | 1.000000 | 4.97904e-19 | 1.000000 |
| rad65          | 1.44804e-19 | 1.000000 | 1.44804e-19 | 1.000000 |
| PhcycC3H3_B+H  | 3.15174e-22 | 1.000000 | 3.15174e-22 | 1.000000 |
| rad47          | 1.15245e-24 | 1.000000 | 1.15245e-24 | 1.000000 |

|                               |             |          |             |          |
|-------------------------------|-------------|----------|-------------|----------|
| rad53                         | 3.69792e-26 | 1.000000 | 3.69792e-26 | 1.000000 |
| rad64                         | 4.72016e-28 | 1.000000 | 4.72016e-28 | 1.000000 |
| Benzene+cycloprop-2-enylidene | 1.33923e-30 | 1.000000 | 1.33923e-30 | 1.000000 |
| rad61                         | 3.99466e-31 | 1.000000 | 3.99466e-31 | 1.000000 |
| rad56                         | 5.89833e-34 | 1.000000 | 5.89833e-34 | 1.000000 |
| rad68syn                      | 1.54133e-35 | 1.000000 | 1.54133e-35 | 1.000000 |
| rad68anti                     | 1.27077e-35 | 1.000000 | 1.27077e-35 | 1.000000 |
| rad19syn                      | 8.38803e-39 | 1.000000 | 8.38803e-39 | 1.000000 |
| rad73                         | 4.86579e-42 | 1.000000 | 4.86579e-42 | 1.000000 |
| rad40syn                      | 3.50196e-42 | 1.000000 | 3.50196e-42 | 1.000000 |
| rad40anti                     | 2.66989e-42 | 1.000000 | 2.66989e-42 | 1.000000 |
| PAH8+H                        | 2.32628e-45 | 1.000000 | 2.32628e-45 | 1.000000 |
| rad71                         | 2.73624e-48 | 1.000000 | 2.73624e-48 | 1.000000 |
| rad8                          | 2.87230e-53 | 1.000000 | 2.87230e-53 | 1.000000 |
| Benzene+cycloprop-1-enylidene | 9.28861e-56 | 1.000000 | 9.28861e-56 | 1.000000 |

10.0000000 Pa, 40.0000000 K

| Rate constant             | True (fraction)        | Effective (fraction)   |
|---------------------------|------------------------|------------------------|
| Total                     | 2.24819e-18 (1.00 )    | 2.24819e-18 (1.00 )    |
| Formation of rad19        | 2.24819e-18 (1.00 )    | 2.24819e-18 (1.00 )    |
| H-abstraction to cyc2enyl | 1.72361e-40 (7.67e-23) | 1.72361e-40 (7.67e-23) |
| H-abstraction to cyclenyl | 2.48792e-59 (1.11e-41) | 2.48792e-59 (1.11e-41) |

| species       | PYtrue      | Cumul    | PYeffective | Cumul    |
|---------------|-------------|----------|-------------|----------|
| Indene+H      | 0.977790    | 0.977790 | 0.977790    | 0.977790 |
| rad9          | 0.0220086   | 0.999799 | 0.0220086   | 0.999799 |
| PhCHCCH2+H    | 0.000166584 | 0.999965 | 0.000166584 | 0.999965 |
| rad15         | 2.04812e-05 | 0.999986 | 2.04812e-05 | 0.999986 |
| rad6          | 8.46752e-06 | 0.999994 | 8.46752e-06 | 0.999994 |
| PhCCH+CH3     | 2.01219e-06 | 0.999996 | 2.01219e-06 | 0.999996 |
| PhCCCH3+H     | 1.30111e-06 | 0.999997 | 1.30111e-06 | 0.999997 |
| Ph+MeAc       | 8.79833e-07 | 0.999998 | 8.79833e-07 | 0.999998 |
| C2H2+PhCH2    | 8.01422e-07 | 0.999999 | 8.01422e-07 | 0.999999 |
| rad2          | 3.50762e-07 | 0.999999 | 3.50762e-07 | 0.999999 |
| rad67         | 3.44175e-07 | 1.000000 | 3.44175e-07 | 1.000000 |
| rad26         | 2.86956e-07 | 1.000000 | 2.86956e-07 | 1.000000 |
| rad35         | 1.53501e-07 | 1.000000 | 1.53501e-07 | 1.000000 |
| rad10         | 3.20114e-08 | 1.000000 | 3.20114e-08 | 1.000000 |
| rad1          | 2.21946e-08 | 1.000000 | 2.21946e-08 | 1.000000 |
| Ph+Allene     | 1.07143e-08 | 1.000000 | 1.07143e-08 | 1.000000 |
| rad28         | 6.91799e-09 | 1.000000 | 6.91799e-09 | 1.000000 |
| rad3          | 3.65430e-09 | 1.000000 | 3.65430e-09 | 1.000000 |
| rad30         | 2.67970e-09 | 1.000000 | 2.67970e-09 | 1.000000 |
| rad7          | 2.53939e-09 | 1.000000 | 2.53939e-09 | 1.000000 |
| rad23         | 2.42880e-09 | 1.000000 | 2.42880e-09 | 1.000000 |
| rad37         | 1.93400e-09 | 1.000000 | 1.93400e-09 | 1.000000 |
| rad4          | 1.84636e-09 | 1.000000 | 1.84636e-09 | 1.000000 |
| PhCH2CCH+H    | 1.66695e-09 | 1.000000 | 1.66695e-09 | 1.000000 |
| rad11         | 9.82882e-10 | 1.000000 | 9.82882e-10 | 1.000000 |
| PAH7+H        | 2.02997e-10 | 1.000000 | 2.02997e-10 | 1.000000 |
| rad45         | 1.36301e-10 | 1.000000 | 1.36301e-10 | 1.000000 |
| rad12         | 1.07151e-10 | 1.000000 | 1.07151e-10 | 1.000000 |
| PAH9+H        | 5.89201e-11 | 1.000000 | 5.89201e-11 | 1.000000 |
| rad39         | 5.45240e-11 | 1.000000 | 5.45240e-11 | 1.000000 |
| rad38         | 2.57382e-11 | 1.000000 | 2.57382e-11 | 1.000000 |
| rad19anti     | 2.54798e-11 | 1.000000 | 2.54798e-11 | 1.000000 |
| rad22         | 1.10583e-11 | 1.000000 | 1.10583e-11 | 1.000000 |
| rad60syn      | 1.09722e-11 | 1.000000 | 1.09722e-11 | 1.000000 |
| rad36         | 8.35560e-12 | 1.000000 | 8.35560e-12 | 1.000000 |
| rad13         | 8.04515e-12 | 1.000000 | 8.04515e-12 | 1.000000 |
| rad60anti     | 5.33334e-12 | 1.000000 | 5.33334e-12 | 1.000000 |
| PAH3+H        | 4.14159e-12 | 1.000000 | 4.14159e-12 | 1.000000 |
| PAH10+CH3     | 1.58884e-12 | 1.000000 | 1.58884e-12 | 1.000000 |
| rad46         | 1.39665e-12 | 1.000000 | 1.39665e-12 | 1.000000 |
| rad59         | 8.64534e-13 | 1.000000 | 8.64534e-13 | 1.000000 |
| PhcycC3H3_A+H | 4.90598e-13 | 1.000000 | 4.90598e-13 | 1.000000 |
| rad14         | 4.63394e-13 | 1.000000 | 4.63394e-13 | 1.000000 |
| rad27         | 4.16255e-13 | 1.000000 | 4.16255e-13 | 1.000000 |
| rad43         | 1.09902e-13 | 1.000000 | 1.09902e-13 | 1.000000 |
| rad5          | 5.57945e-14 | 1.000000 | 5.57945e-14 | 1.000000 |
| rad62         | 1.92495e-14 | 1.000000 | 1.92495e-14 | 1.000000 |
| rad33         | 9.37320e-15 | 1.000000 | 9.37320e-15 | 1.000000 |
| rad50         | 8.15709e-15 | 1.000000 | 8.15709e-15 | 1.000000 |
| rad25         | 7.45583e-15 | 1.000000 | 7.45583e-15 | 1.000000 |
| rad54         | 3.29635e-15 | 1.000000 | 3.29635e-15 | 1.000000 |
| rad18         | 1.63750e-15 | 1.000000 | 1.63750e-15 | 1.000000 |
| rad70         | 2.73956e-16 | 1.000000 | 2.73956e-16 | 1.000000 |

|                               |             |         |             |         |
|-------------------------------|-------------|---------|-------------|---------|
| rad20                         | 1.53749e-16 | 1.00000 | 1.53749e-16 | 1.00000 |
| Phenyl+cycC3H4                | 1.15738e-16 | 1.00000 | 0.00000     | 1.00000 |
| rad21                         | 9.49847e-17 | 1.00000 | 9.49847e-17 | 1.00000 |
| PAH1+H                        | 5.55388e-17 | 1.00000 | 5.55388e-17 | 1.00000 |
| rad52                         | 4.84883e-17 | 1.00000 | 4.84883e-17 | 1.00000 |
| rad58                         | 4.21493e-17 | 1.00000 | 4.21493e-17 | 1.00000 |
| rad55                         | 1.88903e-17 | 1.00000 | 1.88903e-17 | 1.00000 |
| rad51                         | 1.11458e-17 | 1.00000 | 1.11458e-17 | 1.00000 |
| rad31                         | 6.76033e-18 | 1.00000 | 6.76033e-18 | 1.00000 |
| rad34                         | 2.46273e-18 | 1.00000 | 2.46273e-18 | 1.00000 |
| rad24                         | 1.06701e-18 | 1.00000 | 1.06701e-18 | 1.00000 |
| rad41                         | 9.76523e-19 | 1.00000 | 9.76523e-19 | 1.00000 |
| rad42                         | 8.34913e-19 | 1.00000 | 8.34913e-19 | 1.00000 |
| rad65                         | 2.14386e-19 | 1.00000 | 2.14386e-19 | 1.00000 |
| PhcycC3H3_B+H                 | 4.52948e-22 | 1.00000 | 4.52948e-22 | 1.00000 |
| Benzene+cycloprop-2-enylidene | 7.66665e-23 | 1.00000 | 7.66665e-23 | 1.00000 |
| rad47                         | 8.93919e-25 | 1.00000 | 8.93919e-25 | 1.00000 |
| rad53                         | 9.12803e-26 | 1.00000 | 9.12803e-26 | 1.00000 |
| rad64                         | 1.35710e-27 | 1.00000 | 1.35710e-27 | 1.00000 |
| rad61                         | 4.29111e-31 | 1.00000 | 4.29111e-31 | 1.00000 |
| rad56                         | 1.29462e-33 | 1.00000 | 1.29462e-33 | 1.00000 |
| rad68syn                      | 3.12010e-35 | 1.00000 | 3.12010e-35 | 1.00000 |
| rad68anti                     | 2.57164e-35 | 1.00000 | 2.57164e-35 | 1.00000 |
| rad19syn                      | 8.61493e-39 | 1.00000 | 8.61493e-39 | 1.00000 |
| Benzene+cycloprop-1-enylidene | 1.10663e-41 | 1.00000 | 1.10663e-41 | 1.00000 |
| rad73                         | 9.47195e-42 | 1.00000 | 9.47195e-42 | 1.00000 |
| rad40syn                      | 3.71437e-42 | 1.00000 | 3.71437e-42 | 1.00000 |
| rad40anti                     | 2.68254e-42 | 1.00000 | 2.68254e-42 | 1.00000 |
| PAH8+H                        | 3.92226e-45 | 1.00000 | 3.92226e-45 | 1.00000 |
| rad71                         | 5.07528e-48 | 1.00000 | 5.07528e-48 | 1.00000 |
| rad8                          | 9.57113e-54 | 1.00000 | 9.57113e-54 | 1.00000 |

10.0000000 Pa, 50.0000000 K

=====

| Rate constant             | True (fraction)        | Effective (fraction)   |
|---------------------------|------------------------|------------------------|
| Total                     | 1.72707e-17 (1.00 )    | 1.72707e-17 (1.00 )    |
| Formation of rad19        | 1.72707e-17 (1.00 )    | 1.72707e-17 (1.00 )    |
| H-abstraction to cyc2enyl | 5.49905e-35 (3.18e-18) | 5.49905e-35 (3.18e-18) |
| H-abstraction to cyclenyl | 4.93090e-50 (2.86e-33) | 4.93090e-50 (2.86e-33) |

| species    | PYtrue      | Cumul    | PYeffective | Cumul    |
|------------|-------------|----------|-------------|----------|
| Indene+H   | 0.991211    | 0.991211 | 0.991211    | 0.991211 |
| rad9       | 0.00858330  | 0.999794 | 0.00858330  | 0.999794 |
| PhCHCCH2+H | 0.000181775 | 0.999976 | 0.000181775 | 0.999976 |
| rad6       | 9.06717e-06 | 0.999985 | 9.06717e-06 | 0.999985 |
| rad15      | 7.69175e-06 | 0.999993 | 7.69175e-06 | 0.999993 |
| PhCCH+CH3  | 2.31012e-06 | 0.999995 | 2.31012e-06 | 0.999995 |
| PhCCCH3+H  | 1.50134e-06 | 0.999997 | 1.50134e-06 | 0.999997 |
| Ph+MeAc    | 1.03459e-06 | 0.999998 | 1.03459e-06 | 0.999998 |
| C2H2+PhCH2 | 9.08622e-07 | 0.999999 | 9.08622e-07 | 0.999999 |
| rad67      | 3.82125e-07 | 0.999999 | 3.82125e-07 | 0.999999 |
| rad2       | 2.10089e-07 | 0.999999 | 2.10089e-07 | 0.999999 |
| rad26      | 2.01484e-07 | 0.999999 | 2.01484e-07 | 0.999999 |
| rad35      | 1.70005e-07 | 1.000000 | 1.70005e-07 | 1.000000 |
| rad10      | 1.87615e-08 | 1.000000 | 1.87615e-08 | 1.000000 |
| Ph+Allene  | 1.34234e-08 | 1.000000 | 1.34234e-08 | 1.000000 |
| rad1       | 1.33148e-08 | 1.000000 | 1.33148e-08 | 1.000000 |
| rad28      | 8.74641e-09 | 1.000000 | 8.74641e-09 | 1.000000 |
| rad30      | 2.97143e-09 | 1.000000 | 2.97143e-09 | 1.000000 |
| rad7       | 2.56737e-09 | 1.000000 | 2.56737e-09 | 1.000000 |
| rad37      | 2.49449e-09 | 1.000000 | 2.49449e-09 | 1.000000 |
| rad3       | 2.14753e-09 | 1.000000 | 2.14753e-09 | 1.000000 |
| PhCH2CCH+H | 2.05027e-09 | 1.000000 | 2.05027e-09 | 1.000000 |
| rad23      | 1.68202e-09 | 1.000000 | 1.68202e-09 | 1.000000 |
| rad4       | 1.08542e-09 | 1.000000 | 1.08542e-09 | 1.000000 |
| rad11      | 9.73065e-10 | 1.000000 | 9.73065e-10 | 1.000000 |
| PAH7+H     | 3.65663e-10 | 1.000000 | 3.65663e-10 | 1.000000 |
| rad39      | 9.95024e-11 | 1.000000 | 9.95024e-11 | 1.000000 |
| rad45      | 8.80343e-11 | 1.000000 | 8.80343e-11 | 1.000000 |
| PAH9+H     | 6.95247e-11 | 1.000000 | 6.95247e-11 | 1.000000 |
| rad12      | 4.16113e-11 | 1.000000 | 4.16113e-11 | 1.000000 |
| rad38      | 3.11686e-11 | 1.000000 | 3.11686e-11 | 1.000000 |
| rad60syn   | 1.24194e-11 | 1.000000 | 1.24194e-11 | 1.000000 |
| rad19anti  | 9.23458e-12 | 1.000000 | 9.23458e-12 | 1.000000 |
| rad22      | 8.27791e-12 | 1.000000 | 8.27791e-12 | 1.000000 |
| rad13      | 8.04514e-12 | 1.000000 | 8.04514e-12 | 1.000000 |
| rad60anti  | 6.04698e-12 | 1.000000 | 6.04698e-12 | 1.000000 |
| rad36      | 5.39446e-12 | 1.000000 | 5.39446e-12 | 1.000000 |

|                               |             |          |             |          |
|-------------------------------|-------------|----------|-------------|----------|
| PAH3+H                        | 4.79081e-12 | 1.000000 | 4.79081e-12 | 1.000000 |
| PAH10+CH3                     | 2.22793e-12 | 1.000000 | 2.22793e-12 | 1.000000 |
| rad46                         | 1.66931e-12 | 1.000000 | 1.66931e-12 | 1.000000 |
| rad59                         | 9.97135e-13 | 1.000000 | 9.97135e-13 | 1.000000 |
| PhcycC3H3_A+H                 | 5.74524e-13 | 1.000000 | 5.74524e-13 | 1.000000 |
| rad14                         | 2.60473e-13 | 1.000000 | 2.60473e-13 | 1.000000 |
| rad27                         | 2.34553e-13 | 1.000000 | 2.34553e-13 | 1.000000 |
| rad43                         | 1.40397e-13 | 1.000000 | 1.40397e-13 | 1.000000 |
| rad62                         | 2.47837e-14 | 1.000000 | 2.47837e-14 | 1.000000 |
| rad5                          | 2.01694e-14 | 1.000000 | 2.01694e-14 | 1.000000 |
| rad50                         | 1.01025e-14 | 1.000000 | 1.01025e-14 | 1.000000 |
| rad33                         | 9.49404e-15 | 1.000000 | 9.49404e-15 | 1.000000 |
| rad25                         | 7.18549e-15 | 1.000000 | 7.18549e-15 | 1.000000 |
| rad54                         | 5.32366e-15 | 1.000000 | 5.32366e-15 | 1.000000 |
| rad18                         | 9.58845e-16 | 1.000000 | 9.58845e-16 | 1.000000 |
| rad70                         | 3.53740e-16 | 1.000000 | 3.53740e-16 | 1.000000 |
| Phenyl+cycC3H4                | 2.36668e-16 | 1.000000 | 0.00000     | 1.000000 |
| rad20                         | 9.12034e-17 | 1.000000 | 9.12034e-17 | 1.000000 |
| PAH1+H                        | 8.57847e-17 | 1.000000 | 8.57847e-17 | 1.000000 |
| rad52                         | 6.14588e-17 | 1.000000 | 6.14588e-17 | 1.000000 |
| rad21                         | 5.64314e-17 | 1.000000 | 5.64314e-17 | 1.000000 |
| rad58                         | 5.21478e-17 | 1.000000 | 5.21478e-17 | 1.000000 |
| rad55                         | 3.14214e-17 | 1.000000 | 3.14214e-17 | 1.000000 |
| rad51                         | 1.44877e-17 | 1.000000 | 1.44877e-17 | 1.000000 |
| rad31                         | 4.07871e-18 | 1.000000 | 4.07871e-18 | 1.000000 |
| rad34                         | 3.30971e-18 | 1.000000 | 3.30971e-18 | 1.000000 |
| Benzene+cycloprop-2-enylidene | 3.18404e-18 | 1.000000 | 3.18404e-18 | 1.000000 |
| rad41                         | 1.47189e-18 | 1.000000 | 1.47189e-18 | 1.000000 |
| rad42                         | 1.22916e-18 | 1.000000 | 1.22916e-18 | 1.000000 |
| rad24                         | 6.84072e-19 | 1.000000 | 6.84072e-19 | 1.000000 |
| rad65                         | 2.83165e-19 | 1.000000 | 2.83165e-19 | 1.000000 |
| PhcycC3H3_B+H                 | 1.13715e-21 | 1.000000 | 1.13715e-21 | 1.000000 |
| rad47                         | 7.31617e-25 | 1.000000 | 7.31617e-25 | 1.000000 |
| rad53                         | 2.28674e-25 | 1.000000 | 2.28674e-25 | 1.000000 |
| rad64                         | 3.71600e-27 | 1.000000 | 3.71600e-27 | 1.000000 |
| rad61                         | 6.58536e-31 | 1.000000 | 6.58536e-31 | 1.000000 |
| rad56                         | 3.22843e-33 | 1.000000 | 3.22843e-33 | 1.000000 |
| Benzene+cycloprop-1-enylidene | 2.85507e-33 | 1.000000 | 2.85507e-33 | 1.000000 |
| rad68syn                      | 7.63078e-35 | 1.000000 | 7.63078e-35 | 1.000000 |
| rad68anti                     | 6.28836e-35 | 1.000000 | 6.28836e-35 | 1.000000 |
| rad19syn                      | 1.15728e-38 | 1.000000 | 1.15728e-38 | 1.000000 |
| rad73                         | 2.30174e-41 | 1.000000 | 2.30174e-41 | 1.000000 |
| rad40syn                      | 7.51230e-42 | 1.000000 | 7.51230e-42 | 1.000000 |
| rad40anti                     | 5.30354e-42 | 1.000000 | 5.30354e-42 | 1.000000 |
| PAH8+H                        | 8.94071e-45 | 1.000000 | 8.94071e-45 | 1.000000 |
| rad71                         | 1.17124e-47 | 1.000000 | 1.17124e-47 | 1.000000 |
| rad8                          | 4.63962e-54 | 1.000000 | 4.63962e-54 | 1.000000 |

10.000000 Pa, 60.000000 K

=====

| Rate constant             | True (fraction)        | Effective (fraction)   |
|---------------------------|------------------------|------------------------|
| Total                     | 6.93738e-17 (1.00 )    | 6.93738e-17 (1.00 )    |
| Formation of rad19        | 6.93738e-17 (1.00 )    | 6.93738e-17 (1.00 )    |
| H-abstraction to cyc2enyl | 2.50609e-31 (3.61e-15) | 2.50609e-31 (3.61e-15) |
| H-abstraction to cyclenyl | 7.62015e-44 (1.10e-27) | 7.62015e-44 (1.10e-27) |

| species    | PYtrue      | Cumul    | PYeffective | Cumul    |
|------------|-------------|----------|-------------|----------|
| Indene+H   | 0.996076    | 0.996076 | 0.996076    | 0.996076 |
| rad9       | 0.00371079  | 0.999787 | 0.00371079  | 0.999787 |
| PhCHCCH2+H | 0.000193473 | 0.999980 | 0.000193473 | 0.999980 |
| rad6       | 9.44482e-06 | 0.999990 | 9.44482e-06 | 0.999990 |
| rad15      | 3.23338e-06 | 0.999993 | 3.23338e-06 | 0.999993 |
| PhCCH+CH3  | 2.53449e-06 | 0.999995 | 2.53449e-06 | 0.999995 |
| PhCCCH3+H  | 1.65394e-06 | 0.999997 | 1.65394e-06 | 0.999997 |
| Ph+MeAc    | 1.15784e-06 | 0.999998 | 1.15784e-06 | 0.999998 |
| C2H2+PhCH2 | 1.00281e-06 | 0.999999 | 1.00281e-06 | 0.999999 |
| rad67      | 4.12902e-07 | 1.000000 | 4.12902e-07 | 1.000000 |
| rad35      | 1.83298e-07 | 1.000000 | 1.83298e-07 | 1.000000 |
| rad26      | 1.40555e-07 | 1.000000 | 1.40555e-07 | 1.000000 |
| rad2       | 1.33541e-07 | 1.000000 | 1.33541e-07 | 1.000000 |
| Ph+Allene  | 1.62051e-08 | 1.000000 | 1.62051e-08 | 1.000000 |
| rad10      | 1.17286e-08 | 1.000000 | 1.17286e-08 | 1.000000 |
| rad28      | 1.01692e-08 | 1.000000 | 1.01692e-08 | 1.000000 |
| rad1       | 8.48034e-09 | 1.000000 | 8.48034e-09 | 1.000000 |
| rad30      | 3.20828e-09 | 1.000000 | 3.20828e-09 | 1.000000 |
| rad37      | 2.97423e-09 | 1.000000 | 2.97423e-09 | 1.000000 |
| rad7       | 2.56246e-09 | 1.000000 | 2.56246e-09 | 1.000000 |
| PhCH2CCH+H | 2.43813e-09 | 1.000000 | 2.43813e-09 | 1.000000 |

|                               |             |         |             |         |
|-------------------------------|-------------|---------|-------------|---------|
| rad23                         | 1.37609e-09 | 1.00000 | 1.37609e-09 | 1.00000 |
| rad3                          | 1.35261e-09 | 1.00000 | 1.35261e-09 | 1.00000 |
| rad11                         | 9.56224e-10 | 1.00000 | 9.56224e-10 | 1.00000 |
| rad4                          | 6.83941e-10 | 1.00000 | 6.83941e-10 | 1.00000 |
| PAH7+H                        | 5.70139e-10 | 1.00000 | 5.70139e-10 | 1.00000 |
| rad39                         | 1.56275e-10 | 1.00000 | 1.56275e-10 | 1.00000 |
| PAH9+H                        | 7.90190e-11 | 1.00000 | 7.90190e-11 | 1.00000 |
| rad45                         | 6.83760e-11 | 1.00000 | 6.83760e-11 | 1.00000 |
| rad38                         | 3.61245e-11 | 1.00000 | 3.61245e-11 | 1.00000 |
| rad12                         | 1.79791e-11 | 1.00000 | 1.79791e-11 | 1.00000 |
| rad60syn                      | 1.36604e-11 | 1.00000 | 1.36604e-11 | 1.00000 |
| rad13                         | 7.97365e-12 | 1.00000 | 7.97365e-12 | 1.00000 |
| rad22                         | 6.70058e-12 | 1.00000 | 6.70058e-12 | 1.00000 |
| rad60anti                     | 6.66157e-12 | 1.00000 | 6.66157e-12 | 1.00000 |
| PAH3+H                        | 5.37843e-12 | 1.00000 | 5.37843e-12 | 1.00000 |
| rad36                         | 4.18818e-12 | 1.00000 | 4.18818e-12 | 1.00000 |
| rad19anti                     | 3.79358e-12 | 1.00000 | 3.79358e-12 | 1.00000 |
| PAH10+CH3                     | 2.87442e-12 | 1.00000 | 2.87442e-12 | 1.00000 |
| rad46                         | 1.91805e-12 | 1.00000 | 1.91805e-12 | 1.00000 |
| rad59                         | 1.11628e-12 | 1.00000 | 1.11628e-12 | 1.00000 |
| PhcycC3H3_A+H                 | 6.83428e-13 | 1.00000 | 6.83428e-13 | 1.00000 |
| rad43                         | 1.69146e-13 | 1.00000 | 1.69146e-13 | 1.00000 |
| rad14                         | 1.58940e-13 | 1.00000 | 1.58940e-13 | 1.00000 |
| rad27                         | 1.42648e-13 | 1.00000 | 1.42648e-13 | 1.00000 |
| rad62                         | 3.00527e-14 | 1.00000 | 3.00527e-14 | 1.00000 |
| rad50                         | 1.19696e-14 | 1.00000 | 1.19696e-14 | 1.00000 |
| rad33                         | 9.52414e-15 | 1.00000 | 9.52414e-15 | 1.00000 |
| rad5                          | 8.78625e-15 | 1.00000 | 8.78625e-15 | 1.00000 |
| rad54                         | 7.80403e-15 | 1.00000 | 7.80403e-15 | 1.00000 |
| rad25                         | 6.93818e-15 | 1.00000 | 6.93818e-15 | 1.00000 |
| Benzene+cycloprop-2-enylidene | 3.61245e-15 | 1.00000 | 3.61245e-15 | 1.00000 |
| rad18                         | 6.24027e-16 | 1.00000 | 6.24027e-16 | 1.00000 |
| Phenyl+cycC3H4                | 4.45921e-16 | 1.00000 | 0.00000     | 1.00000 |
| rad70                         | 4.42534e-16 | 1.00000 | 4.42534e-16 | 1.00000 |
| PAH1+H                        | 1.22168e-16 | 1.00000 | 1.22168e-16 | 1.00000 |
| rad52                         | 7.43749e-17 | 1.00000 | 7.43749e-17 | 1.00000 |
| rad58                         | 6.26266e-17 | 1.00000 | 6.26266e-17 | 1.00000 |
| rad20                         | 6.12290e-17 | 1.00000 | 6.12290e-17 | 1.00000 |
| rad55                         | 4.75193e-17 | 1.00000 | 4.75193e-17 | 1.00000 |
| rad21                         | 3.79563e-17 | 1.00000 | 3.79563e-17 | 1.00000 |
| rad51                         | 1.79579e-17 | 1.00000 | 1.79579e-17 | 1.00000 |
| rad34                         | 4.31878e-18 | 1.00000 | 4.31878e-18 | 1.00000 |
| rad31                         | 2.62362e-18 | 1.00000 | 2.62362e-18 | 1.00000 |
| rad41                         | 2.09600e-18 | 1.00000 | 2.09600e-18 | 1.00000 |
| rad42                         | 1.70395e-18 | 1.00000 | 1.70395e-18 | 1.00000 |
| rad24                         | 5.29869e-19 | 1.00000 | 5.29869e-19 | 1.00000 |
| rad65                         | 3.55931e-19 | 1.00000 | 3.55931e-19 | 1.00000 |
| PhcycC3H3_B+H                 | 1.66257e-20 | 1.00000 | 1.66257e-20 | 1.00000 |
| rad47                         | 6.26553e-25 | 1.00000 | 6.26553e-25 | 1.00000 |
| rad53                         | 6.23710e-25 | 1.00000 | 6.23710e-25 | 1.00000 |
| rad64                         | 1.07823e-26 | 1.00000 | 1.07823e-26 | 1.00000 |
| Benzene+cycloprop-1-enylidene | 1.09842e-27 | 1.00000 | 1.09842e-27 | 1.00000 |
| rad61                         | 1.45407e-30 | 1.00000 | 1.45407e-30 | 1.00000 |
| rad56                         | 9.38046e-33 | 1.00000 | 9.38046e-33 | 1.00000 |
| rad68syn                      | 2.21460e-34 | 1.00000 | 2.21460e-34 | 1.00000 |
| rad68anti                     | 1.82467e-34 | 1.00000 | 1.82467e-34 | 1.00000 |
| rad19syn                      | 1.80525e-38 | 1.00000 | 1.80525e-38 | 1.00000 |
| rad73                         | 6.73832e-41 | 1.00000 | 6.73832e-41 | 1.00000 |
| rad40syn                      | 2.09068e-41 | 1.00000 | 2.09068e-41 | 1.00000 |
| rad40anti                     | 1.46694e-41 | 1.00000 | 1.46694e-41 | 1.00000 |
| PAH8+H                        | 2.53561e-44 | 1.00000 | 2.53561e-44 | 1.00000 |
| rad71                         | 3.32540e-47 | 1.00000 | 3.32540e-47 | 1.00000 |
| rad8                          | 2.82574e-54 | 1.00000 | 2.82574e-54 | 1.00000 |

10.000000 Pa, 70.000000 K

=====

| Rate constant             | True (fraction)        | Effective (fraction)   |
|---------------------------|------------------------|------------------------|
| Total                     | 1.91520e-16 (1.00 )    | 1.91520e-16 (1.00 )    |
| Formation of rad19        | 1.91520e-16 (1.000 )   | 1.91520e-16 (1.000 )   |
| H-abstraction to cyc2enyl | 1.01125e-28 (5.28e-13) | 1.01125e-28 (5.28e-13) |
| H-abstraction to cyclenyl | 1.97822e-39 (1.03e-23) | 1.97822e-39 (1.03e-23) |

| species    | PYtrue      | Cumul    | PYeffective | Cumul    |
|------------|-------------|----------|-------------|----------|
| Indene+H   | 0.998038    | 0.998038 | 0.998038    | 0.998038 |
| rad9       | 0.00174001  | 0.999778 | 0.00174001  | 0.999778 |
| PhCHCCH2+H | 0.000203377 | 0.999981 | 0.000203377 | 0.999981 |
| rad6       | 9.70279e-06 | 0.999991 | 9.70279e-06 | 0.999991 |
| PhCCH+CH3  | 2.71936e-06 | 0.999994 | 2.71936e-06 | 0.999994 |



|                               |             |          |             |          |
|-------------------------------|-------------|----------|-------------|----------|
| PhCCCH3+H                     | 1.78056e-06 | 0.999996 | 1.78056e-06 | 0.999996 |
| rad15                         | 1.48295e-06 | 0.999997 | 1.48295e-06 | 0.999997 |
| Ph+MeAc                       | 1.26365e-06 | 0.999998 | 1.26365e-06 | 0.999998 |
| C2H2+PhCH2                    | 1.09164e-06 | 0.999999 | 1.09164e-06 | 0.999999 |
| rad67                         | 4.40031e-07 | 1.000000 | 4.40031e-07 | 1.000000 |
| rad35                         | 1.94952e-07 | 1.000000 | 1.94952e-07 | 1.000000 |
| rad26                         | 9.86175e-08 | 1.000000 | 9.86175e-08 | 1.000000 |
| rad2                          | 8.94735e-08 | 1.000000 | 8.94735e-08 | 1.000000 |
| Ph+Allene                     | 1.91511e-08 | 1.000000 | 1.91511e-08 | 1.000000 |
| rad28                         | 1.12755e-08 | 1.000000 | 1.12755e-08 | 1.000000 |
| rad10                         | 7.75199e-09 | 1.000000 | 7.75199e-09 | 1.000000 |
| rad1                          | 5.69517e-09 | 1.000000 | 5.69517e-09 | 1.000000 |
| rad30                         | 3.41755e-09 | 1.000000 | 3.41755e-09 | 1.000000 |
| rad37                         | 3.40006e-09 | 1.000000 | 3.40006e-09 | 1.000000 |
| PhCH2CCH+H                    | 2.84637e-09 | 1.000000 | 2.84637e-09 | 1.000000 |
| rad7                          | 2.54515e-09 | 1.000000 | 2.54515e-09 | 1.000000 |
| rad23                         | 1.19997e-09 | 1.000000 | 1.19997e-09 | 1.000000 |
| rad11                         | 9.38209e-10 | 1.000000 | 9.38209e-10 | 1.000000 |
| rad3                          | 9.05026e-10 | 1.000000 | 9.05026e-10 | 1.000000 |
| PAH7+H                        | 8.15640e-10 | 1.000000 | 8.15640e-10 | 1.000000 |
| rad4                          | 4.57860e-10 | 1.000000 | 4.57860e-10 | 1.000000 |
| rad39                         | 2.24627e-10 | 1.000000 | 2.24627e-10 | 1.000000 |
| PAH9+H                        | 8.81209e-11 | 1.000000 | 8.81209e-11 | 1.000000 |
| rad45                         | 5.72271e-11 | 1.000000 | 5.72271e-11 | 1.000000 |
| rad38                         | 4.09047e-11 | 1.000000 | 4.09047e-11 | 1.000000 |
| rad60syn                      | 1.48064e-11 | 1.000000 | 1.48064e-11 | 1.000000 |
| rad12                         | 8.44311e-12 | 1.000000 | 8.44311e-12 | 1.000000 |
| rad13                         | 7.88214e-12 | 1.000000 | 7.88214e-12 | 1.000000 |
| rad60anti                     | 7.23109e-12 | 1.000000 | 7.23109e-12 | 1.000000 |
| PAH3+H                        | 5.94599e-12 | 1.000000 | 5.94599e-12 | 1.000000 |
| rad22                         | 5.64250e-12 | 1.000000 | 5.64250e-12 | 1.000000 |
| PAH10+CH3                     | 3.54213e-12 | 1.000000 | 3.54213e-12 | 1.000000 |
| rad36                         | 3.50418e-12 | 1.000000 | 3.50418e-12 | 1.000000 |
| rad46                         | 2.16020e-12 | 1.000000 | 2.16020e-12 | 1.000000 |
| rad19anti                     | 1.71300e-12 | 1.000000 | 1.71300e-12 | 1.000000 |
| rad59                         | 1.23063e-12 | 1.000000 | 1.23063e-12 | 1.000000 |
| PhcycC3H3_A+H                 | 8.21534e-13 | 1.000000 | 8.21534e-13 | 1.000000 |
| Benzene+cycloprop-2-enylidene | 5.28015e-13 | 1.000000 | 5.28015e-13 | 1.000000 |
| rad43                         | 1.97570e-13 | 1.000000 | 1.97570e-13 | 1.000000 |
| rad14                         | 1.03845e-13 | 1.000000 | 1.03845e-13 | 1.000000 |
| rad27                         | 9.23757e-14 | 1.000000 | 9.23757e-14 | 1.000000 |
| rad62                         | 3.53044e-14 | 1.000000 | 3.53044e-14 | 1.000000 |
| rad50                         | 1.38670e-14 | 1.000000 | 1.38670e-14 | 1.000000 |
| rad54                         | 1.08161e-14 | 1.000000 | 1.08161e-14 | 1.000000 |
| rad33                         | 9.52206e-15 | 1.000000 | 9.52206e-15 | 1.000000 |
| rad25                         | 6.72446e-15 | 1.000000 | 6.72446e-15 | 1.000000 |
| rad5                          | 4.35490e-15 | 1.000000 | 4.35490e-15 | 1.000000 |
| Phenyl+cycC3H4                | 7.87809e-16 | 1.000000 | 0.000000    | 1.000000 |
| rad70                         | 5.44836e-16 | 1.000000 | 5.44836e-16 | 1.000000 |
| rad18                         | 4.36812e-16 | 1.000000 | 4.36812e-16 | 1.000000 |
| PAH1+H                        | 1.66375e-16 | 1.000000 | 1.66375e-16 | 1.000000 |
| rad52                         | 8.79296e-17 | 1.000000 | 8.79296e-17 | 1.000000 |
| rad58                         | 7.41036e-17 | 1.000000 | 7.41036e-17 | 1.000000 |
| rad55                         | 6.80400e-17 | 1.000000 | 6.80400e-17 | 1.000000 |
| rad20                         | 4.45926e-17 | 1.000000 | 4.45926e-17 | 1.000000 |
| rad21                         | 2.76959e-17 | 1.000000 | 2.76959e-17 | 1.000000 |
| rad51                         | 2.17376e-17 | 1.000000 | 2.17376e-17 | 1.000000 |
| rad34                         | 5.55683e-18 | 1.000000 | 5.55683e-18 | 1.000000 |
| rad41                         | 2.89141e-18 | 1.000000 | 2.89141e-18 | 1.000000 |
| rad42                         | 2.28669e-18 | 1.000000 | 2.28669e-18 | 1.000000 |
| rad31                         | 1.78582e-18 | 1.000000 | 1.78582e-18 | 1.000000 |
| rad24                         | 4.43398e-19 | 1.000000 | 4.43398e-19 | 1.000000 |
| rad65                         | 4.36504e-19 | 1.000000 | 4.36504e-19 | 1.000000 |
| PhcycC3H3_B+H                 | 2.42746e-19 | 1.000000 | 2.42746e-19 | 1.000000 |
| Benzene+cycloprop-1-enylidene | 1.03290e-23 | 1.000000 | 1.03290e-23 | 1.000000 |
| rad53                         | 1.93311e-24 | 1.000000 | 1.93311e-24 | 1.000000 |
| rad47                         | 5.56322e-25 | 1.000000 | 5.56322e-25 | 1.000000 |
| rad64                         | 3.55783e-26 | 1.000000 | 3.55783e-26 | 1.000000 |
| rad61                         | 5.10059e-30 | 1.000000 | 5.10059e-30 | 1.000000 |
| rad56                         | 3.38325e-32 | 1.000000 | 3.38325e-32 | 1.000000 |
| rad68syn                      | 8.06341e-34 | 1.000000 | 8.06341e-34 | 1.000000 |
| rad68anti                     | 6.64227e-34 | 1.000000 | 6.64227e-34 | 1.000000 |
| rad19syn                      | 3.07679e-38 | 1.000000 | 3.07679e-38 | 1.000000 |
| rad73                         | 2.50177e-40 | 1.000000 | 2.50177e-40 | 1.000000 |
| rad40syn                      | 7.89500e-41 | 1.000000 | 7.89500e-41 | 1.000000 |
| rad40anti                     | 5.55719e-41 | 1.000000 | 5.55719e-41 | 1.000000 |
| PAH8+H                        | 9.32589e-44 | 1.000000 | 9.32589e-44 | 1.000000 |
| rad71                         | 1.22006e-46 | 1.000000 | 1.22006e-46 | 1.000000 |
| rad8                          | 2.01557e-54 | 1.000000 | 2.01557e-54 | 1.000000 |

10.0000000 Pa, 80.0000000 K

| Rate constant             | True (fraction)        | Effective (fraction)   |
|---------------------------|------------------------|------------------------|
| Total                     | 4.17084e-16 (1.00 )    | 4.17084e-16 (1.00 )    |
| Formation of rad19        | 4.17084e-16 (1.000 )   | 4.17084e-16 (1.000 )   |
| H-abstraction to cyc2enyl | 8.98751e-27 (2.15e-11) | 8.98751e-27 (2.15e-11) |
| H-abstraction to cyclenyl | 4.00120e-36 (9.59e-21) | 4.00120e-36 (9.59e-21) |

| species                       | PYtrue      | Cumul    | PYeffective | Cumul    |
|-------------------------------|-------------|----------|-------------|----------|
| Indene+H                      | 0.998897    | 0.998897 | 0.998897    | 0.998897 |
| rad9                          | 0.000871455 | 0.999768 | 0.000871455 | 0.999768 |
| PhCHCCH2+H                    | 0.000212328 | 0.999981 | 0.000212328 | 0.999981 |
| rad6                          | 9.88985e-06 | 0.999991 | 9.88985e-06 | 0.999991 |
| PhCCH+CH3                     | 2.88270e-06 | 0.999994 | 2.88270e-06 | 0.999994 |
| PhCCCH3+H                     | 1.89281e-06 | 0.999995 | 1.89281e-06 | 0.999995 |
| Ph+MeAc                       | 1.35995e-06 | 0.999997 | 1.35995e-06 | 0.999997 |
| C2H2+PhCH2                    | 1.17929e-06 | 0.999998 | 1.17929e-06 | 0.999998 |
| rad15                         | 7.29338e-07 | 0.999999 | 7.29338e-07 | 0.999999 |
| rad67                         | 4.65360e-07 | 0.999999 | 4.65360e-07 | 0.999999 |
| rad35                         | 2.05785e-07 | 0.999999 | 2.05785e-07 | 0.999999 |
| rad26                         | 6.98950e-08 | 0.999999 | 6.98950e-08 | 0.999999 |
| rad2                          | 6.28406e-08 | 1.000000 | 6.28406e-08 | 1.000000 |
| Ph+Allene                     | 2.23347e-08 | 1.000000 | 2.23347e-08 | 1.000000 |
| rad28                         | 1.21382e-08 | 1.000000 | 1.21382e-08 | 1.000000 |
| rad10                         | 5.38166e-09 | 1.000000 | 5.38166e-09 | 1.000000 |
| rad1                          | 4.01048e-09 | 1.000000 | 4.01048e-09 | 1.000000 |
| rad37                         | 3.79255e-09 | 1.000000 | 3.79255e-09 | 1.000000 |
| rad30                         | 3.61348e-09 | 1.000000 | 3.61348e-09 | 1.000000 |
| PhCH2CCH+H                    | 3.28727e-09 | 1.000000 | 3.28727e-09 | 1.000000 |
| rad7                          | 2.52333e-09 | 1.000000 | 2.52333e-09 | 1.000000 |
| PAH7+H                        | 1.10350e-09 | 1.000000 | 1.10350e-09 | 1.000000 |
| rad23                         | 1.07739e-09 | 1.000000 | 1.07739e-09 | 1.000000 |
| rad11                         | 9.20886e-10 | 1.000000 | 9.20886e-10 | 1.000000 |
| rad3                          | 6.38973e-10 | 1.000000 | 6.38973e-10 | 1.000000 |
| rad4                          | 3.23458e-10 | 1.000000 | 3.23458e-10 | 1.000000 |
| rad39                         | 3.04938e-10 | 1.000000 | 3.04938e-10 | 1.000000 |
| PAH9+H                        | 9.72489e-11 | 1.000000 | 9.72489e-11 | 1.000000 |
| rad45                         | 4.96773e-11 | 1.000000 | 4.96773e-11 | 1.000000 |
| rad38                         | 4.57011e-11 | 1.000000 | 4.57011e-11 | 1.000000 |
| Benzene+cycloprop-2-enylidene | 2.15484e-11 | 1.000000 | 2.15484e-11 | 1.000000 |
| rad60syn                      | 1.59195e-11 | 1.000000 | 1.59195e-11 | 1.000000 |
| rad13                         | 7.78854e-12 | 1.000000 | 7.78854e-12 | 1.000000 |
| rad60anti                     | 7.78592e-12 | 1.000000 | 7.78592e-12 | 1.000000 |
| PAH3+H                        | 6.51897e-12 | 1.000000 | 6.51897e-12 | 1.000000 |
| rad22                         | 4.87172e-12 | 1.000000 | 4.87172e-12 | 1.000000 |
| PAH10+CH3                     | 4.24760e-12 | 1.000000 | 4.24760e-12 | 1.000000 |
| rad12                         | 4.24074e-12 | 1.000000 | 4.24074e-12 | 1.000000 |
| rad36                         | 3.04130e-12 | 1.000000 | 3.04130e-12 | 1.000000 |
| rad46                         | 2.40639e-12 | 1.000000 | 2.40639e-12 | 1.000000 |
| rad59                         | 1.34544e-12 | 1.000000 | 1.34544e-12 | 1.000000 |
| PhcycC3H3_A+H                 | 9.95869e-13 | 1.000000 | 9.95869e-13 | 1.000000 |
| rad19anti                     | 8.33580e-13 | 1.000000 | 8.33580e-13 | 1.000000 |
| rad43                         | 2.26731e-13 | 1.000000 | 2.26731e-13 | 1.000000 |
| rad14                         | 7.19793e-14 | 1.000000 | 7.19793e-14 | 1.000000 |
| rad27                         | 6.31283e-14 | 1.000000 | 6.31283e-14 | 1.000000 |
| rad62                         | 4.07296e-14 | 1.000000 | 4.07296e-14 | 1.000000 |
| rad50                         | 1.58732e-14 | 1.000000 | 1.58732e-14 | 1.000000 |
| rad54                         | 1.44762e-14 | 1.000000 | 1.44762e-14 | 1.000000 |
| rad33                         | 9.50962e-15 | 1.000000 | 9.50962e-15 | 1.000000 |
| rad25                         | 6.54169e-15 | 1.000000 | 6.54169e-15 | 1.000000 |
| rad5                          | 2.37781e-15 | 1.000000 | 2.37781e-15 | 1.000000 |
| Phenyl+cycC3H4                | 1.32430e-15 | 1.000000 | 0.000000    | 1.000000 |
| rad70                         | 6.65557e-16 | 1.000000 | 6.65557e-16 | 1.000000 |
| rad18                         | 3.22535e-16 | 1.000000 | 3.22535e-16 | 1.000000 |
| PAH1+H                        | 2.20778e-16 | 1.000000 | 2.20778e-16 | 1.000000 |
| rad52                         | 1.02690e-16 | 1.000000 | 1.02690e-16 | 1.000000 |
| rad55                         | 9.42113e-17 | 1.000000 | 9.42113e-17 | 1.000000 |
| rad58                         | 8.70576e-17 | 1.000000 | 8.70576e-17 | 1.000000 |
| rad20                         | 3.43996e-17 | 1.000000 | 3.43996e-17 | 1.000000 |
| rad51                         | 2.59971e-17 | 1.000000 | 2.59971e-17 | 1.000000 |
| rad21                         | 2.14041e-17 | 1.000000 | 2.14041e-17 | 1.000000 |
| rad34                         | 7.10875e-18 | 1.000000 | 7.10875e-18 | 1.000000 |
| rad41                         | 3.91369e-18 | 1.000000 | 3.91369e-18 | 1.000000 |
| rad42                         | 3.01212e-18 | 1.000000 | 3.01212e-18 | 1.000000 |
| PhcycC3H3_B+H                 | 1.96821e-18 | 1.000000 | 1.96821e-18 | 1.000000 |
| rad31                         | 1.27869e-18 | 1.000000 | 1.27869e-18 | 1.000000 |
| rad65                         | 5.28697e-19 | 1.000000 | 5.28697e-19 | 1.000000 |
| rad24                         | 3.85456e-19 | 1.000000 | 3.85456e-19 | 1.000000 |

|                               |             |          |             |          |
|-------------------------------|-------------|----------|-------------|----------|
| Benzene+cycloprop-1-enylidene | 9.59328e-21 | 1.000000 | 9.59328e-21 | 1.000000 |
| rad53                         | 6.63132e-24 | 1.000000 | 6.63132e-24 | 1.000000 |
| rad47                         | 5.08501e-25 | 1.000000 | 5.08501e-25 | 1.000000 |
| rad64                         | 1.38474e-25 | 1.000000 | 1.38474e-25 | 1.000000 |
| rad61                         | 3.83300e-29 | 1.000000 | 3.83300e-29 | 1.000000 |
| rad56                         | 1.75351e-31 | 1.000000 | 1.75351e-31 | 1.000000 |
| rad68syn                      | 4.33639e-33 | 1.000000 | 4.33639e-33 | 1.000000 |
| rad68anti                     | 3.57155e-33 | 1.000000 | 3.57155e-33 | 1.000000 |
| rad19syn                      | 5.56556e-38 | 1.000000 | 5.56556e-38 | 1.000000 |
| rad73                         | 1.38035e-39 | 1.000000 | 1.38035e-39 | 1.000000 |
| rad40syn                      | 5.05846e-40 | 1.000000 | 5.05846e-40 | 1.000000 |
| rad40anti                     | 3.63823e-40 | 1.000000 | 3.63823e-40 | 1.000000 |
| PAH8+H                        | 5.21213e-43 | 1.000000 | 5.21213e-43 | 1.000000 |
| rad71                         | 6.71607e-46 | 1.000000 | 6.71607e-46 | 1.000000 |
| rad8                          | 1.62020e-54 | 1.000000 | 1.62020e-54 | 1.000000 |

10.0000000 Pa, 90.0000000 K

| Rate constant             | True (fraction)        | Effective (fraction)   |
|---------------------------|------------------------|------------------------|
| Total                     | 7.74016e-16 (1.00 )    | 7.74016e-16 (1.00 )    |
| Formation of rad19        | 7.74016e-16 (1.000 )   | 7.74016e-16 (1.000 )   |
| H-abstraction to cyc2enyl | 2.91736e-25 (3.77e-10) | 2.91736e-25 (3.77e-10) |
| H-abstraction to cyclenyl | 1.47814e-33 (1.91e-18) | 1.47814e-33 (1.91e-18) |

| species                       | PYtrue      | Cumul    | PYeffective | Cumul    |
|-------------------------------|-------------|----------|-------------|----------|
| Indene+H                      | 0.999299    | 0.999299 | 0.999299    | 0.999299 |
| rad9                          | 0.000460986 | 0.999760 | 0.000460986 | 0.999760 |
| PhCHCCH2+H                    | 0.000220798 | 0.999981 | 0.000220798 | 0.999981 |
| rad6                          | 1.00313e-05 | 0.999991 | 1.00313e-05 | 0.999991 |
| PhCCH+CH3                     | 3.03478e-06 | 0.999994 | 3.03478e-06 | 0.999994 |
| PhCCCH3+H                     | 1.99741e-06 | 0.999996 | 1.99741e-06 | 0.999996 |
| Ph+MeAc                       | 1.45153e-06 | 0.999997 | 1.45153e-06 | 0.999997 |
| C2H2+PhCH2                    | 1.26844e-06 | 0.999999 | 1.26844e-06 | 0.999999 |
| rad67                         | 4.89974e-07 | 0.999999 | 4.89974e-07 | 0.999999 |
| rad15                         | 3.79932e-07 | 0.999999 | 3.79932e-07 | 0.999999 |
| rad35                         | 2.16274e-07 | 1.000000 | 2.16274e-07 | 1.000000 |
| rad26                         | 5.01174e-08 | 1.000000 | 5.01174e-08 | 1.000000 |
| rad2                          | 4.60970e-08 | 1.000000 | 4.60970e-08 | 1.000000 |
| Ph+Allene                     | 2.58253e-08 | 1.000000 | 2.58253e-08 | 1.000000 |
| rad28                         | 1.28125e-08 | 1.000000 | 1.28125e-08 | 1.000000 |
| rad37                         | 4.16691e-09 | 1.000000 | 4.16691e-09 | 1.000000 |
| rad10                         | 3.90775e-09 | 1.000000 | 3.90775e-09 | 1.000000 |
| rad30                         | 3.80445e-09 | 1.000000 | 3.80445e-09 | 1.000000 |
| PhCH2CCH+H                    | 3.77211e-09 | 1.000000 | 3.77211e-09 | 1.000000 |
| rad1                          | 2.95052e-09 | 1.000000 | 2.95052e-09 | 1.000000 |
| rad7                          | 2.50022e-09 | 1.000000 | 2.50022e-09 | 1.000000 |
| PAH7+H                        | 1.43687e-09 | 1.000000 | 1.43687e-09 | 1.000000 |
| rad23                         | 9.83389e-10 | 1.000000 | 9.83389e-10 | 1.000000 |
| rad11                         | 9.04772e-10 | 1.000000 | 9.04772e-10 | 1.000000 |
| rad3                          | 4.73795e-10 | 1.000000 | 4.73795e-10 | 1.000000 |
| rad39                         | 3.98095e-10 | 1.000000 | 3.98095e-10 | 1.000000 |
| Benzene+cycloprop-2-enylidene | 3.76912e-10 | 1.000000 | 3.76912e-10 | 1.000000 |
| rad4                          | 2.40008e-10 | 1.000000 | 2.40008e-10 | 1.000000 |
| PAH9+H                        | 1.06689e-10 | 1.000000 | 1.06689e-10 | 1.000000 |
| rad38                         | 5.06547e-11 | 1.000000 | 5.06547e-11 | 1.000000 |
| rad45                         | 4.40708e-11 | 1.000000 | 4.40708e-11 | 1.000000 |
| rad60syn                      | 1.70393e-11 | 1.000000 | 1.70393e-11 | 1.000000 |
| rad60anti                     | 8.34557e-12 | 1.000000 | 8.34557e-12 | 1.000000 |
| rad13                         | 7.69898e-12 | 1.000000 | 7.69898e-12 | 1.000000 |
| PAH3+H                        | 7.11550e-12 | 1.000000 | 7.11550e-12 | 1.000000 |
| PAH10+CH3                     | 5.00861e-12 | 1.000000 | 5.00861e-12 | 1.000000 |
| rad22                         | 4.28214e-12 | 1.000000 | 4.28214e-12 | 1.000000 |
| rad36                         | 2.69794e-12 | 1.000000 | 2.69794e-12 | 1.000000 |
| rad46                         | 2.66435e-12 | 1.000000 | 2.66435e-12 | 1.000000 |
| rad12                         | 2.25198e-12 | 1.000000 | 2.25198e-12 | 1.000000 |
| rad59                         | 1.46437e-12 | 1.000000 | 1.46437e-12 | 1.000000 |
| PhcycC3H3_A+H                 | 1.21608e-12 | 1.000000 | 1.21608e-12 | 1.000000 |
| rad19anti                     | 4.31187e-13 | 1.000000 | 4.31187e-13 | 1.000000 |
| rad43                         | 2.57504e-13 | 1.000000 | 2.57504e-13 | 1.000000 |
| rad14                         | 5.26019e-14 | 1.000000 | 5.26019e-14 | 1.000000 |
| rad62                         | 4.64895e-14 | 1.000000 | 4.64895e-14 | 1.000000 |
| rad27                         | 4.52727e-14 | 1.000000 | 4.52727e-14 | 1.000000 |
| rad54                         | 1.89415e-14 | 1.000000 | 1.89415e-14 | 1.000000 |
| rad50                         | 1.80553e-14 | 1.000000 | 1.80553e-14 | 1.000000 |
| rad33                         | 9.49519e-15 | 1.000000 | 9.49519e-15 | 1.000000 |
| rad25                         | 6.38465e-15 | 1.000000 | 6.38465e-15 | 1.000000 |
| Phenyl+cycC3H4                | 2.14284e-15 | 1.000000 | 0.00000     | 1.000000 |
| rad5                          | 1.40281e-15 | 1.000000 | 1.40281e-15 | 1.000000 |

|                               |             |          |             |          |
|-------------------------------|-------------|----------|-------------|----------|
| rad70                         | 8.10598e-16 | 1.000000 | 8.10598e-16 | 1.000000 |
| PAH1+H                        | 2.88581e-16 | 1.000000 | 2.88581e-16 | 1.000000 |
| rad18                         | 2.48079e-16 | 1.000000 | 2.48079e-16 | 1.000000 |
| rad55                         | 1.27729e-16 | 1.000000 | 1.27729e-16 | 1.000000 |
| rad52                         | 1.19199e-16 | 1.000000 | 1.19199e-16 | 1.000000 |
| rad58                         | 1.01997e-16 | 1.000000 | 1.01997e-16 | 1.000000 |
| rad51                         | 3.09200e-17 | 1.000000 | 3.09200e-17 | 1.000000 |
| rad20                         | 2.76945e-17 | 1.000000 | 2.76945e-17 | 1.000000 |
| rad21                         | 1.72616e-17 | 1.000000 | 1.72616e-17 | 1.000000 |
| PhcycC3H3_B+H                 | 1.03978e-17 | 1.000000 | 1.03978e-17 | 1.000000 |
| rad34                         | 9.08730e-18 | 1.000000 | 9.08730e-18 | 1.000000 |
| rad41                         | 5.23746e-18 | 1.000000 | 5.23746e-18 | 1.000000 |
| rad42                         | 3.92537e-18 | 1.000000 | 3.92537e-18 | 1.000000 |
| Benzene+cycloprop-1-enylidene | 1.90970e-18 | 1.000000 | 1.90970e-18 | 1.000000 |
| rad31                         | 9.59406e-19 | 1.000000 | 9.59406e-19 | 1.000000 |
| rad65                         | 6.36799e-19 | 1.000000 | 6.36799e-19 | 1.000000 |
| rad24                         | 3.42828e-19 | 1.000000 | 3.42828e-19 | 1.000000 |
| rad53                         | 2.29255e-23 | 1.000000 | 2.29255e-23 | 1.000000 |
| rad64                         | 6.01158e-25 | 1.000000 | 6.01158e-25 | 1.000000 |
| rad47                         | 4.75960e-25 | 1.000000 | 4.75960e-25 | 1.000000 |
| rad61                         | 5.95031e-28 | 1.000000 | 5.95031e-28 | 1.000000 |
| rad56                         | 1.62291e-30 | 1.000000 | 1.62291e-30 | 1.000000 |
| rad68syn                      | 4.84264e-32 | 1.000000 | 4.84264e-32 | 1.000000 |
| rad68anti                     | 3.98318e-32 | 1.000000 | 3.98318e-32 | 1.000000 |
| rad19syn                      | 1.05536e-37 | 1.000000 | 1.05536e-37 | 1.000000 |
| rad73                         | 1.72440e-38 | 1.000000 | 1.72440e-38 | 1.000000 |
| rad40syn                      | 1.14596e-38 | 1.000000 | 1.14596e-38 | 1.000000 |
| rad40anti                     | 8.75416e-39 | 1.000000 | 8.75416e-39 | 1.000000 |
| PAH8+H                        | 6.86254e-42 | 1.000000 | 6.86254e-42 | 1.000000 |
| rad71                         | 7.93506e-45 | 1.000000 | 7.93506e-45 | 1.000000 |
| rad8                          | 1.43491e-54 | 1.000000 | 1.43491e-54 | 1.000000 |

10.0000000 Pa, 100.000000 K

=====

| Rate constant             | True (fraction)        | Effective (fraction)   |
|---------------------------|------------------------|------------------------|
| Total                     | 1.28255e-15 (1.00 )    | 1.28255e-15 (1.00 )    |
| Formation of rad19        | 1.28255e-15 (1.000 )   | 1.28255e-15 (1.000 )   |
| H-abstraction to cyc2enyl | 4.68359e-24 (3.65e-09) | 4.68359e-24 (3.65e-09) |
| H-abstraction to cyclenyl | 1.66242e-31 (1.30e-16) | 1.66242e-31 (1.30e-16) |

| species                       | PYtrue      | Cumul    | PYeffective | Cumul    |
|-------------------------------|-------------|----------|-------------|----------|
| Indene+H                      | 0.999496    | 0.999496 | 0.999496    | 0.999496 |
| rad9                          | 0.000255404 | 0.999751 | 0.000255404 | 0.999751 |
| PhCHCCH2+H                    | 0.000229075 | 0.999980 | 0.000229075 | 0.999980 |
| rad6                          | 1.01411e-05 | 0.999991 | 1.01411e-05 | 0.999991 |
| PhCCH+CH3                     | 3.18193e-06 | 0.999994 | 3.18193e-06 | 0.999994 |
| PhCCCH3+H                     | 2.09859e-06 | 0.999996 | 2.09859e-06 | 0.999996 |
| Ph+MeAc                       | 1.54159e-06 | 0.999997 | 1.54159e-06 | 0.999997 |
| C2H2+PhCH2                    | 1.36101e-06 | 0.999999 | 1.36101e-06 | 0.999999 |
| rad67                         | 5.14584e-07 | 0.999999 | 5.14584e-07 | 0.999999 |
| rad35                         | 2.26728e-07 | 1.000000 | 2.26728e-07 | 1.000000 |
| rad15                         | 2.07730e-07 | 1.000000 | 2.07730e-07 | 1.000000 |
| rad26                         | 3.63754e-08 | 1.000000 | 3.63754e-08 | 1.000000 |
| rad2                          | 3.52315e-08 | 1.000000 | 3.52315e-08 | 1.000000 |
| Ph+Allene                     | 2.96962e-08 | 1.000000 | 2.96962e-08 | 1.000000 |
| rad28                         | 1.33393e-08 | 1.000000 | 1.33393e-08 | 1.000000 |
| rad37                         | 4.53461e-09 | 1.000000 | 4.53461e-09 | 1.000000 |
| PhCH2CCH+H                    | 4.31266e-09 | 1.000000 | 4.31266e-09 | 1.000000 |
| rad30                         | 3.99597e-09 | 1.000000 | 3.99597e-09 | 1.000000 |
| Benzene+cycloprop-2-enylidene | 3.65179e-09 | 1.000000 | 3.65179e-09 | 1.000000 |
| rad10                         | 2.95966e-09 | 1.000000 | 2.95966e-09 | 1.000000 |
| rad7                          | 2.47705e-09 | 1.000000 | 2.47705e-09 | 1.000000 |
| rad1                          | 2.26233e-09 | 1.000000 | 2.26233e-09 | 1.000000 |
| PAH7+H                        | 1.82056e-09 | 1.000000 | 1.82056e-09 | 1.000000 |
| rad23                         | 9.07449e-10 | 1.000000 | 9.07449e-10 | 1.000000 |
| rad11                         | 8.89895e-10 | 1.000000 | 8.89895e-10 | 1.000000 |
| rad39                         | 5.05462e-10 | 1.000000 | 5.05462e-10 | 1.000000 |
| rad3                          | 3.67590e-10 | 1.000000 | 3.67590e-10 | 1.000000 |
| rad4                          | 1.86354e-10 | 1.000000 | 1.86354e-10 | 1.000000 |
| PAH9+H                        | 1.16667e-10 | 1.000000 | 1.16667e-10 | 1.000000 |
| rad38                         | 5.58835e-11 | 1.000000 | 5.58835e-11 | 1.000000 |
| rad45                         | 3.96827e-11 | 1.000000 | 3.96827e-11 | 1.000000 |
| rad60syn                      | 1.81946e-11 | 1.000000 | 1.81946e-11 | 1.000000 |
| rad60anti                     | 8.92428e-12 | 1.000000 | 8.92428e-12 | 1.000000 |
| PAH3+H                        | 7.75053e-12 | 1.000000 | 7.75053e-12 | 1.000000 |
| rad13                         | 7.61501e-12 | 1.000000 | 7.61501e-12 | 1.000000 |
| PAH10+CH3                     | 5.84465e-12 | 1.000000 | 5.84465e-12 | 1.000000 |
| rad22                         | 3.81574e-12 | 1.000000 | 3.81574e-12 | 1.000000 |

|                               |             |          |             |          |
|-------------------------------|-------------|----------|-------------|----------|
| rad46                         | 2.94058e-12 | 1.000000 | 2.94058e-12 | 1.000000 |
| rad36                         | 2.42960e-12 | 1.000000 | 2.42960e-12 | 1.000000 |
| rad59                         | 1.59039e-12 | 1.000000 | 1.59039e-12 | 1.000000 |
| PhcycC3H3_A+H                 | 1.49520e-12 | 1.000000 | 1.49520e-12 | 1.000000 |
| rad12                         | 1.25351e-12 | 1.000000 | 1.25351e-12 | 1.000000 |
| rad43                         | 2.90697e-13 | 1.000000 | 2.90697e-13 | 1.000000 |
| rad19anti                     | 2.34746e-13 | 1.000000 | 2.34746e-13 | 1.000000 |
| rad62                         | 5.27361e-14 | 1.000000 | 5.27361e-14 | 1.000000 |
| rad14                         | 4.03376e-14 | 1.000000 | 4.03376e-14 | 1.000000 |
| rad27                         | 3.39474e-14 | 1.000000 | 3.39474e-14 | 1.000000 |
| rad54                         | 2.44218e-14 | 1.000000 | 2.44218e-14 | 1.000000 |
| rad50                         | 2.04795e-14 | 1.000000 | 2.04795e-14 | 1.000000 |
| rad33                         | 9.48172e-15 | 1.000000 | 9.48172e-15 | 1.000000 |
| rad25                         | 6.24826e-15 | 1.000000 | 6.24826e-15 | 1.000000 |
| Phenyl+cycC3H4                | 3.36905e-15 | 1.000000 | 0.00000     | 1.000000 |
| rad70                         | 9.87474e-16 | 1.000000 | 9.87474e-16 | 1.000000 |
| rad5                          | 8.83484e-16 | 1.000000 | 8.83484e-16 | 1.000000 |
| PAH1+H                        | 3.74122e-16 | 1.000000 | 3.74122e-16 | 1.000000 |
| rad18                         | 1.97053e-16 | 1.000000 | 1.97053e-16 | 1.000000 |
| rad55                         | 1.70929e-16 | 1.000000 | 1.70929e-16 | 1.000000 |
| rad52                         | 1.38051e-16 | 1.000000 | 1.38051e-16 | 1.000000 |
| Benzene+cycloprop-1-enylidene | 1.29619e-16 | 1.000000 | 1.29619e-16 | 1.000000 |
| rad58                         | 1.19515e-16 | 1.000000 | 1.19515e-16 | 1.000000 |
| PhcycC3H3_B+H                 | 4.08526e-17 | 1.000000 | 4.08526e-17 | 1.000000 |
| rad51                         | 3.67247e-17 | 1.000000 | 3.67247e-17 | 1.000000 |
| rad20                         | 2.30419e-17 | 1.000000 | 2.30419e-17 | 1.000000 |
| rad21                         | 1.43848e-17 | 1.000000 | 1.43848e-17 | 1.000000 |
| rad34                         | 1.16475e-17 | 1.000000 | 1.16475e-17 | 1.000000 |
| rad41                         | 6.96470e-18 | 1.000000 | 6.96470e-18 | 1.000000 |
| rad42                         | 5.08628e-18 | 1.000000 | 5.08628e-18 | 1.000000 |
| rad65                         | 7.66070e-19 | 1.000000 | 7.66070e-19 | 1.000000 |
| rad31                         | 7.52338e-19 | 1.000000 | 7.52338e-19 | 1.000000 |
| rad24                         | 3.09740e-19 | 1.000000 | 3.09740e-19 | 1.000000 |
| rad53                         | 7.41713e-23 | 1.000000 | 7.41713e-23 | 1.000000 |
| rad64                         | 2.59861e-24 | 1.000000 | 2.59861e-24 | 1.000000 |
| rad47                         | 4.54454e-25 | 1.000000 | 4.54454e-25 | 1.000000 |
| rad61                         | 9.26334e-27 | 1.000000 | 9.26334e-27 | 1.000000 |
| rad56                         | 2.33461e-29 | 1.000000 | 2.33461e-29 | 1.000000 |
| rad68syn                      | 9.97519e-31 | 1.000000 | 9.97519e-31 | 1.000000 |
| rad68anti                     | 8.15991e-31 | 1.000000 | 8.15991e-31 | 1.000000 |
| rad40syn                      | 2.69875e-36 | 1.000000 | 2.69875e-36 | 1.000000 |
| rad40anti                     | 2.08123e-36 | 1.000000 | 2.08123e-36 | 1.000000 |
| rad73                         | 8.02561e-37 | 1.000000 | 8.02561e-37 | 1.000000 |
| rad19syn                      | 2.08918e-37 | 1.000000 | 2.08918e-37 | 1.000000 |
| PAH8+H                        | 4.24544e-40 | 1.000000 | 4.24544e-40 | 1.000000 |
| rad71                         | 3.22428e-43 | 1.000000 | 3.22428e-43 | 1.000000 |
| rad8                          | 1.38042e-54 | 1.000000 | 1.38042e-54 | 1.000000 |

10.000000 Pa, 110.000000 K

=====

| Rate constant             | True (fraction)        | Effective (fraction)   |
|---------------------------|------------------------|------------------------|
| Total                     | 1.95524e-15 (1.00 )    | 1.95524e-15 (1.00 )    |
| Formation of rad19        | 1.95524e-15 (1.00 )    | 1.95524e-15 (1.00 )    |
| H-abstraction to cyc2enyl | 4.50936e-23 (2.31e-08) | 4.50936e-23 (2.31e-08) |
| H-abstraction to cyclenyl | 7.87782e-30 (4.03e-15) | 7.87782e-30 (4.03e-15) |

| species                       | PYtrue      | Cumul    | PYeffective | Cumul    |
|-------------------------------|-------------|----------|-------------|----------|
| Indene+H                      | 0.999596    | 0.999596 | 0.999596    | 0.999596 |
| PhCHCCH2+H                    | 0.000237358 | 0.999833 | 0.000237358 | 0.999833 |
| rad9                          | 0.000147247 | 0.999981 | 0.000147247 | 0.999981 |
| rad6                          | 1.02272e-05 | 0.999991 | 1.02272e-05 | 0.999991 |
| PhCCH+CH3                     | 3.32847e-06 | 0.999994 | 3.32847e-06 | 0.999994 |
| PhCCCH3+H                     | 2.19924e-06 | 0.999996 | 2.19924e-06 | 0.999996 |
| Ph+MeAc                       | 1.63241e-06 | 0.999998 | 1.63241e-06 | 0.999998 |
| C2H2+PhCH2                    | 1.45864e-06 | 0.999999 | 1.45864e-06 | 0.999999 |
| rad67                         | 5.39712e-07 | 1.000000 | 5.39712e-07 | 1.000000 |
| rad35                         | 2.37372e-07 | 1.000000 | 2.37372e-07 | 1.000000 |
| rad15                         | 1.18381e-07 | 1.000000 | 1.18381e-07 | 1.000000 |
| Ph+Allene                     | 3.40303e-08 | 1.000000 | 3.40303e-08 | 1.000000 |
| rad2                          | 2.79968e-08 | 1.000000 | 2.79968e-08 | 1.000000 |
| rad26                         | 2.67297e-08 | 1.000000 | 2.67297e-08 | 1.000000 |
| Benzene+cycloprop-2-enylidene | 2.30629e-08 | 1.000000 | 2.30629e-08 | 1.000000 |
| rad28                         | 1.37492e-08 | 1.000000 | 1.37492e-08 | 1.000000 |
| PhCH2CCH+H                    | 4.92220e-09 | 1.000000 | 4.92220e-09 | 1.000000 |
| rad37                         | 4.90481e-09 | 1.000000 | 4.90481e-09 | 1.000000 |
| rad30                         | 4.19211e-09 | 1.000000 | 4.19211e-09 | 1.000000 |
| rad7                          | 2.45423e-09 | 1.000000 | 2.45423e-09 | 1.000000 |
| rad10                         | 2.33275e-09 | 1.000000 | 2.33275e-09 | 1.000000 |

|                               |             |         |             |         |
|-------------------------------|-------------|---------|-------------|---------|
| PAH7+H                        | 2.26119e-09 | 1.00000 | 2.26119e-09 | 1.00000 |
| rad1                          | 1.80412e-09 | 1.00000 | 1.80412e-09 | 1.00000 |
| rad11                         | 8.76107e-10 | 1.00000 | 8.76107e-10 | 1.00000 |
| rad23                         | 8.44099e-10 | 1.00000 | 8.44099e-10 | 1.00000 |
| rad39                         | 6.28902e-10 | 1.00000 | 6.28902e-10 | 1.00000 |
| rad3                          | 2.97312e-10 | 1.00000 | 2.97312e-10 | 1.00000 |
| rad4                          | 1.50857e-10 | 1.00000 | 1.50857e-10 | 1.00000 |
| PAH9+H                        | 1.27392e-10 | 1.00000 | 1.27392e-10 | 1.00000 |
| rad38                         | 6.14988e-11 | 1.00000 | 6.14988e-11 | 1.00000 |
| rad45                         | 3.61295e-11 | 1.00000 | 3.61295e-11 | 1.00000 |
| rad60syn                      | 1.94091e-11 | 1.00000 | 1.94091e-11 | 1.00000 |
| rad60anti                     | 9.53399e-12 | 1.00000 | 9.53399e-12 | 1.00000 |
| PAH3+H                        | 8.43822e-12 | 1.00000 | 8.43822e-12 | 1.00000 |
| rad13                         | 7.53635e-12 | 1.00000 | 7.53635e-12 | 1.00000 |
| PAH10+CH3                     | 6.77802e-12 | 1.00000 | 6.77802e-12 | 1.00000 |
| rad22                         | 3.43724e-12 | 1.00000 | 3.43724e-12 | 1.00000 |
| rad46                         | 3.24137e-12 | 1.00000 | 3.24137e-12 | 1.00000 |
| rad36                         | 2.21272e-12 | 1.00000 | 2.21272e-12 | 1.00000 |
| PhcycC3H3_A+H                 | 1.85090e-12 | 1.00000 | 1.85090e-12 | 1.00000 |
| rad59                         | 1.72623e-12 | 1.00000 | 1.72623e-12 | 1.00000 |
| rad12                         | 7.26550e-13 | 1.00000 | 7.26550e-13 | 1.00000 |
| rad43                         | 3.27134e-13 | 1.00000 | 3.27134e-13 | 1.00000 |
| rad19anti                     | 1.33505e-13 | 1.00000 | 1.33505e-13 | 1.00000 |
| rad62                         | 5.96279e-14 | 1.00000 | 5.96279e-14 | 1.00000 |
| rad14                         | 3.23160e-14 | 1.00000 | 3.23160e-14 | 1.00000 |
| rad54                         | 3.11966e-14 | 1.00000 | 3.11966e-14 | 1.00000 |
| rad27                         | 2.65384e-14 | 1.00000 | 2.65384e-14 | 1.00000 |
| rad50                         | 2.32193e-14 | 1.00000 | 2.32193e-14 | 1.00000 |
| rad33                         | 9.46978e-15 | 1.00000 | 9.46978e-15 | 1.00000 |
| rad25                         | 6.12815e-15 | 1.00000 | 6.12815e-15 | 1.00000 |
| Phenyl+cycC3H4                | 5.18630e-15 | 1.00000 | 0.00000     | 1.00000 |
| Benzene+cycloprop-1-enylidene | 4.02908e-15 | 1.00000 | 4.02908e-15 | 1.00000 |
| rad70                         | 1.20613e-15 | 1.00000 | 1.20613e-15 | 1.00000 |
| rad5                          | 5.89236e-16 | 1.00000 | 5.89236e-16 | 1.00000 |
| PAH1+H                        | 4.83359e-16 | 1.00000 | 4.83359e-16 | 1.00000 |
| rad55                         | 2.27052e-16 | 1.00000 | 2.27052e-16 | 1.00000 |
| rad18                         | 1.60644e-16 | 1.00000 | 1.60644e-16 | 1.00000 |
| rad52                         | 1.59949e-16 | 1.00000 | 1.59949e-16 | 1.00000 |
| rad58                         | 1.40350e-16 | 1.00000 | 1.40350e-16 | 1.00000 |
| PhcycC3H3_B+H                 | 1.30160e-16 | 1.00000 | 1.30160e-16 | 1.00000 |
| rad51                         | 4.36877e-17 | 1.00000 | 4.36877e-17 | 1.00000 |
| rad20                         | 1.96770e-17 | 1.00000 | 1.96770e-17 | 1.00000 |
| rad34                         | 1.50078e-17 | 1.00000 | 1.50078e-17 | 1.00000 |
| rad21                         | 1.23026e-17 | 1.00000 | 1.23026e-17 | 1.00000 |
| rad41                         | 9.23652e-18 | 1.00000 | 9.23652e-18 | 1.00000 |
| rad42                         | 6.57560e-18 | 1.00000 | 6.57560e-18 | 1.00000 |
| rad65                         | 9.23321e-19 | 1.00000 | 9.23321e-19 | 1.00000 |
| rad31                         | 6.15199e-19 | 1.00000 | 6.15199e-19 | 1.00000 |
| rad24                         | 2.83152e-19 | 1.00000 | 2.83152e-19 | 1.00000 |
| rad53                         | 2.19191e-22 | 1.00000 | 2.19191e-22 | 1.00000 |
| rad64                         | 1.03594e-23 | 1.00000 | 1.03594e-23 | 1.00000 |
| rad47                         | 4.41383e-25 | 1.00000 | 4.41383e-25 | 1.00000 |
| rad61                         | 1.04717e-25 | 1.00000 | 1.04717e-25 | 1.00000 |
| rad56                         | 3.27635e-28 | 1.00000 | 3.27635e-28 | 1.00000 |
| rad68syn                      | 1.91793e-29 | 1.00000 | 1.91793e-29 | 1.00000 |
| rad68anti                     | 1.55857e-29 | 1.00000 | 1.55857e-29 | 1.00000 |
| rad40syn                      | 3.30917e-34 | 1.00000 | 3.30917e-34 | 1.00000 |
| rad40anti                     | 2.60936e-34 | 1.00000 | 2.60936e-34 | 1.00000 |
| rad73                         | 3.96264e-35 | 1.00000 | 3.96264e-35 | 1.00000 |
| rad19syn                      | 4.31585e-37 | 1.00000 | 4.31585e-37 | 1.00000 |
| PAH8+H                        | 7.29875e-38 | 1.00000 | 7.29875e-38 | 1.00000 |
| rad71                         | 3.38961e-41 | 1.00000 | 3.38961e-41 | 1.00000 |
| rad8                          | 1.42859e-54 | 1.00000 | 1.42859e-54 | 1.00000 |

10.000000 Pa, 120.000000 K

=====

| Rate constant             | True (fraction)        | Effective (fraction)   |
|---------------------------|------------------------|------------------------|
| Total                     | 2.79817e-15 (1.00 )    | 2.79817e-15 (1.00 )    |
| Formation of rad19        | 2.79817e-15 (1.00 )    | 2.79817e-15 (1.00 )    |
| H-abstraction to cyc2enyl | 2.96039e-22 (1.06e-07) | 2.96039e-22 (1.06e-07) |
| H-abstraction to cyclenyl | 1.95323e-28 (6.98e-14) | 1.95323e-28 (6.98e-14) |

| species    | PYtrue      | Cumul    | PYeffective | Cumul    |
|------------|-------------|----------|-------------|----------|
| Indene+H   | 0.999646    | 0.999646 | 0.999646    | 0.999646 |
| PhCHCCH2+H | 0.000245795 | 0.999892 | 0.000245795 | 0.999892 |
| rad9       | 8.78868e-05 | 0.999980 | 8.78868e-05 | 0.999980 |
| rad6       | 1.02941e-05 | 0.999990 | 1.02941e-05 | 0.999990 |
| PhCCH+CH3  | 3.47755e-06 | 0.999993 | 3.47755e-06 | 0.999993 |

|                               |             |          |             |          |
|-------------------------------|-------------|----------|-------------|----------|
| PhCCCH3+H                     | 2.30151e-06 | 0.999996 | 2.30151e-06 | 0.999996 |
| Ph+MeAc                       | 1.72582e-06 | 0.999997 | 1.72582e-06 | 0.999997 |
| C2H2+PhCH2                    | 1.56287e-06 | 0.999999 | 1.56287e-06 | 0.999999 |
| rad67                         | 5.65785e-07 | 1.000000 | 5.65785e-07 | 1.000000 |
| rad35                         | 2.48388e-07 | 1.000000 | 2.48388e-07 | 1.000000 |
| Benzene+cycloprop-2-enylidene | 1.05797e-07 | 1.000000 | 1.05797e-07 | 1.000000 |
| rad15                         | 6.99336e-08 | 1.000000 | 6.99336e-08 | 1.000000 |
| Ph+Allene                     | 3.89257e-08 | 1.000000 | 3.89257e-08 | 1.000000 |
| rad2                          | 2.30756e-08 | 1.000000 | 2.30756e-08 | 1.000000 |
| rad26                         | 1.98896e-08 | 1.000000 | 1.98896e-08 | 1.000000 |
| rad28                         | 1.40648e-08 | 1.000000 | 1.40648e-08 | 1.000000 |
| PhCH2CCH+H                    | 5.61653e-09 | 1.000000 | 5.61653e-09 | 1.000000 |
| rad37                         | 5.28536e-09 | 1.000000 | 5.28536e-09 | 1.000000 |
| rad30                         | 4.39625e-09 | 1.000000 | 4.39625e-09 | 1.000000 |
| PAH7+H                        | 2.76737e-09 | 1.000000 | 2.76737e-09 | 1.000000 |
| rad7                          | 2.43174e-09 | 1.000000 | 2.43174e-09 | 1.000000 |
| rad10                         | 1.90856e-09 | 1.000000 | 1.90856e-09 | 1.000000 |
| rad1                          | 1.49275e-09 | 1.000000 | 1.49275e-09 | 1.000000 |
| rad11                         | 8.63201e-10 | 1.000000 | 8.63201e-10 | 1.000000 |
| rad23                         | 7.90051e-10 | 1.000000 | 7.90051e-10 | 1.000000 |
| rad39                         | 7.70844e-10 | 1.000000 | 7.70844e-10 | 1.000000 |
| rad3                          | 2.49663e-10 | 1.000000 | 2.49663e-10 | 1.000000 |
| PAH9+H                        | 1.39075e-10 | 1.000000 | 1.39075e-10 | 1.000000 |
| rad4                          | 1.26803e-10 | 1.000000 | 1.26803e-10 | 1.000000 |
| rad38                         | 6.76158e-11 | 1.000000 | 6.76158e-11 | 1.000000 |
| rad45                         | 3.31804e-11 | 1.000000 | 3.31804e-11 | 1.000000 |
| rad60syn                      | 2.07049e-11 | 1.000000 | 2.07049e-11 | 1.000000 |
| rad60anti                     | 1.01859e-11 | 1.000000 | 1.01859e-11 | 1.000000 |
| PAH3+H                        | 9.19338e-12 | 1.000000 | 9.19338e-12 | 1.000000 |
| PAH10+CH3                     | 7.83525e-12 | 1.000000 | 7.83525e-12 | 1.000000 |
| rad13                         | 7.46196e-12 | 1.000000 | 7.46196e-12 | 1.000000 |
| rad46                         | 3.57346e-12 | 1.000000 | 3.57346e-12 | 1.000000 |
| rad22                         | 3.12363e-12 | 1.000000 | 3.12363e-12 | 1.000000 |
| PhcycC3H3_A+H                 | 2.30724e-12 | 1.000000 | 2.30724e-12 | 1.000000 |
| rad36                         | 2.03311e-12 | 1.000000 | 2.03311e-12 | 1.000000 |
| rad59                         | 1.87473e-12 | 1.000000 | 1.87473e-12 | 1.000000 |
| rad12                         | 4.36237e-13 | 1.000000 | 4.36237e-13 | 1.000000 |
| rad43                         | 3.67727e-13 | 1.000000 | 3.67727e-13 | 1.000000 |
| rad19anti                     | 7.88599e-14 | 1.000000 | 7.88599e-14 | 1.000000 |
| Benzene+cycloprop-1-enylidene | 6.98038e-14 | 1.000000 | 6.98038e-14 | 1.000000 |
| rad62                         | 6.73426e-14 | 1.000000 | 6.73426e-14 | 1.000000 |
| rad54                         | 3.96411e-14 | 1.000000 | 3.96411e-14 | 1.000000 |
| rad14                         | 2.69212e-14 | 1.000000 | 2.69212e-14 | 1.000000 |
| rad50                         | 2.63616e-14 | 1.000000 | 2.63616e-14 | 1.000000 |
| rad27                         | 2.15650e-14 | 1.000000 | 2.15650e-14 | 1.000000 |
| rad33                         | 9.45889e-15 | 1.000000 | 9.45889e-15 | 1.000000 |
| Phenyl+cycC3H4                | 7.86468e-15 | 1.000000 | 0.000000    | 1.000000 |
| rad25                         | 6.02067e-15 | 1.000000 | 6.02067e-15 | 1.000000 |
| rad70                         | 1.47999e-15 | 1.000000 | 1.47999e-15 | 1.000000 |
| PAH1+H                        | 6.24563e-16 | 1.000000 | 6.24563e-16 | 1.000000 |
| rad5                          | 4.13714e-16 | 1.000000 | 4.13714e-16 | 1.000000 |
| PhcycC3H3_B+H                 | 3.56090e-16 | 1.000000 | 3.56090e-16 | 1.000000 |
| rad55                         | 3.00633e-16 | 1.000000 | 3.00633e-16 | 1.000000 |
| rad52                         | 1.85777e-16 | 1.000000 | 1.85777e-16 | 1.000000 |
| rad58                         | 1.65453e-16 | 1.000000 | 1.65453e-16 | 1.000000 |
| rad18                         | 1.33793e-16 | 1.000000 | 1.33793e-16 | 1.000000 |
| rad51                         | 5.21738e-17 | 1.000000 | 5.21738e-17 | 1.000000 |
| rad34                         | 1.94815e-17 | 1.000000 | 1.94815e-17 | 1.000000 |
| rad20                         | 1.71620e-17 | 1.000000 | 1.71620e-17 | 1.000000 |
| rad41                         | 1.22496e-17 | 1.000000 | 1.22496e-17 | 1.000000 |
| rad21                         | 1.07455e-17 | 1.000000 | 1.07455e-17 | 1.000000 |
| rad42                         | 8.50345e-18 | 1.000000 | 8.50345e-18 | 1.000000 |
| rad65                         | 1.11768e-18 | 1.000000 | 1.11768e-18 | 1.000000 |
| rad31                         | 5.23232e-19 | 1.000000 | 5.23232e-19 | 1.000000 |
| rad24                         | 2.61245e-19 | 1.000000 | 2.61245e-19 | 1.000000 |
| rad53                         | 5.94245e-22 | 1.000000 | 5.94245e-22 | 1.000000 |
| rad64                         | 3.71784e-23 | 1.000000 | 3.71784e-23 | 1.000000 |
| rad61                         | 8.52256e-25 | 1.000000 | 8.52256e-25 | 1.000000 |
| rad47                         | 4.35146e-25 | 1.000000 | 4.35146e-25 | 1.000000 |
| rad56                         | 3.59573e-27 | 1.000000 | 3.59573e-27 | 1.000000 |
| rad68syn                      | 2.64568e-28 | 1.000000 | 2.64568e-28 | 1.000000 |
| rad68anti                     | 2.13720e-28 | 1.000000 | 2.13720e-28 | 1.000000 |
| rad40syn                      | 1.58686e-32 | 1.000000 | 1.58686e-32 | 1.000000 |
| rad40anti                     | 1.25634e-32 | 1.000000 | 1.25634e-32 | 1.000000 |
| rad73                         | 1.24216e-33 | 1.000000 | 1.24216e-33 | 1.000000 |
| PAH8+H                        | 3.96166e-35 | 1.000000 | 3.96166e-35 | 1.000000 |
| rad19syn                      | 9.31505e-37 | 1.000000 | 9.31505e-37 | 1.000000 |
| rad71                         | 1.13958e-38 | 1.000000 | 1.13958e-38 | 1.000000 |
| rad8                          | 1.57848e-54 | 1.000000 | 1.57848e-54 | 1.000000 |

10.0000000 Pa, 130.000000 K

```

=====
Rate constant      | True (fraction)      Effective (fraction)
-----
Total              | 3.81236e-15 (1.00   ) 3.81236e-15 (1.00   )
Formation of rad19| 3.81236e-15 (1.000  ) 3.81236e-15 (1.000  )
H-abstraction to cyc2enyl| 1.44825e-21 (3.80e-07) 1.44825e-21 (3.80e-07)
H-abstraction to cyclenyl| 2.94348e-27 (7.72e-13) 2.94348e-27 (7.72e-13)
  
```

| species                       | PYtrue      | Cumul    | PYeffective | Cumul    |
|-------------------------------|-------------|----------|-------------|----------|
| Indene+H                      | 0.999671    | 0.999671 | 0.999671    | 0.999671 |
| PhCHCCH2+H                    | 0.000254511 | 0.999925 | 0.000254511 | 0.999925 |
| rad9                          | 5.40837e-05 | 0.999979 | 5.40837e-05 | 0.999979 |
| rad6                          | 1.03444e-05 | 0.999990 | 1.03444e-05 | 0.999990 |
| PhCCH+CH3                     | 3.63177e-06 | 0.999993 | 3.63177e-06 | 0.999993 |
| PhCCCH3+H                     | 2.40717e-06 | 0.999996 | 2.40717e-06 | 0.999996 |
| Ph+MeAc                       | 1.82342e-06 | 0.999997 | 1.82342e-06 | 0.999997 |
| C2H2+PhCH2                    | 1.67525e-06 | 0.999999 | 1.67525e-06 | 0.999999 |
| rad67                         | 5.93188e-07 | 1.000000 | 5.93188e-07 | 1.000000 |
| Benzene+cycloprop-2-enylidene | 3.79882e-07 | 1.000000 | 3.79882e-07 | 1.000000 |
| rad35                         | 2.59937e-07 | 1.000000 | 2.59937e-07 | 1.000000 |
| Ph+Allene                     | 4.45005e-08 | 1.000000 | 4.45005e-08 | 1.000000 |
| rad15                         | 4.26400e-08 | 1.000000 | 4.26400e-08 | 1.000000 |
| rad2                          | 1.96666e-08 | 1.000000 | 1.96666e-08 | 1.000000 |
| rad26                         | 1.49911e-08 | 1.000000 | 1.49911e-08 | 1.000000 |
| rad28                         | 1.43030e-08 | 1.000000 | 1.43030e-08 | 1.000000 |
| PhCH2CCH+H                    | 6.41487e-09 | 1.000000 | 6.41487e-09 | 1.000000 |
| rad37                         | 5.68343e-09 | 1.000000 | 5.68343e-09 | 1.000000 |
| rad30                         | 4.61148e-09 | 1.000000 | 4.61148e-09 | 1.000000 |
| PAH7+H                        | 3.35005e-09 | 1.000000 | 3.35005e-09 | 1.000000 |
| rad7                          | 2.40934e-09 | 1.000000 | 2.40934e-09 | 1.000000 |
| rad10                         | 1.61581e-09 | 1.000000 | 1.61581e-09 | 1.000000 |
| rad1                          | 1.27759e-09 | 1.000000 | 1.27759e-09 | 1.000000 |
| rad39                         | 9.34371e-10 | 1.000000 | 9.34371e-10 | 1.000000 |
| rad11                         | 8.50949e-10 | 1.000000 | 8.50949e-10 | 1.000000 |
| rad23                         | 7.43117e-10 | 1.000000 | 7.43117e-10 | 1.000000 |
| rad3                          | 2.16660e-10 | 1.000000 | 2.16660e-10 | 1.000000 |
| PAH9+H                        | 1.51947e-10 | 1.000000 | 1.51947e-10 | 1.000000 |
| rad4                          | 1.10159e-10 | 1.000000 | 1.10159e-10 | 1.000000 |
| rad38                         | 7.43617e-11 | 1.000000 | 7.43617e-11 | 1.000000 |
| rad45                         | 3.06846e-11 | 1.000000 | 3.06846e-11 | 1.000000 |
| rad60syn                      | 2.21045e-11 | 1.000000 | 2.21045e-11 | 1.000000 |
| rad60anti                     | 1.08915e-11 | 1.000000 | 1.08915e-11 | 1.000000 |
| PAH3+H                        | 1.00326e-11 | 1.000000 | 1.00326e-11 | 1.000000 |
| PAH10+CH3                     | 9.04866e-12 | 1.000000 | 9.04866e-12 | 1.000000 |
| rad13                         | 7.39047e-12 | 1.000000 | 7.39047e-12 | 1.000000 |
| rad46                         | 3.94449e-12 | 1.000000 | 3.94449e-12 | 1.000000 |
| PhcycC3H3_A+H                 | 2.89700e-12 | 1.000000 | 2.89700e-12 | 1.000000 |
| rad22                         | 2.85920e-12 | 1.000000 | 2.85920e-12 | 1.000000 |
| rad59                         | 2.03902e-12 | 1.000000 | 2.03902e-12 | 1.000000 |
| rad36                         | 1.88151e-12 | 1.000000 | 1.88151e-12 | 1.000000 |
| Benzene+cycloprop-1-enylidene | 7.72089e-13 | 1.000000 | 7.72089e-13 | 1.000000 |
| rad43                         | 4.13531e-13 | 1.000000 | 4.13531e-13 | 1.000000 |
| rad12                         | 2.70204e-13 | 1.000000 | 2.70204e-13 | 1.000000 |
| rad62                         | 7.60884e-14 | 1.000000 | 7.60884e-14 | 1.000000 |
| rad54                         | 5.02609e-14 | 1.000000 | 5.02609e-14 | 1.000000 |
| rad19anti                     | 4.81608e-14 | 1.000000 | 4.81608e-14 | 1.000000 |
| rad50                         | 3.00138e-14 | 1.000000 | 3.00138e-14 | 1.000000 |
| rad14                         | 2.32027e-14 | 1.000000 | 2.32027e-14 | 1.000000 |
| rad27                         | 1.81518e-14 | 1.000000 | 1.81518e-14 | 1.000000 |
| Phenyl+cycC3H4                | 1.18041e-14 | 1.000000 | 0.000000    | 1.000000 |
| rad33                         | 9.44797e-15 | 1.000000 | 9.44797e-15 | 1.000000 |
| rad25                         | 5.92275e-15 | 1.000000 | 5.92275e-15 | 1.000000 |
| rad70                         | 1.82746e-15 | 1.000000 | 1.82746e-15 | 1.000000 |
| PhcycC3H3_B+H                 | 8.69675e-16 | 1.000000 | 8.69675e-16 | 1.000000 |
| PAH1+H                        | 8.09326e-16 | 1.000000 | 8.09326e-16 | 1.000000 |
| rad55                         | 3.98065e-16 | 1.000000 | 3.98065e-16 | 1.000000 |
| rad5                          | 3.04258e-16 | 1.000000 | 3.04258e-16 | 1.000000 |
| rad52                         | 2.16673e-16 | 1.000000 | 2.16673e-16 | 1.000000 |
| rad58                         | 1.96068e-16 | 1.000000 | 1.96068e-16 | 1.000000 |
| rad18                         | 1.13436e-16 | 1.000000 | 1.13436e-16 | 1.000000 |
| rad51                         | 6.26732e-17 | 1.000000 | 6.26732e-17 | 1.000000 |
| rad34                         | 2.55225e-17 | 1.000000 | 2.55225e-17 | 1.000000 |
| rad41                         | 1.62791e-17 | 1.000000 | 1.62791e-17 | 1.000000 |
| rad20                         | 1.52314e-17 | 1.000000 | 1.52314e-17 | 1.000000 |
| rad42                         | 1.10208e-17 | 1.000000 | 1.10208e-17 | 1.000000 |
| rad21                         | 9.54957e-18 | 1.000000 | 9.54957e-18 | 1.000000 |
| rad65                         | 1.36158e-18 | 1.000000 | 1.36158e-18 | 1.000000 |
| rad31                         | 4.61382e-19 | 1.000000 | 4.61382e-19 | 1.000000 |



|           |             |         |             |         |
|-----------|-------------|---------|-------------|---------|
| rad24     | 2.42838e-19 | 1.00000 | 2.42838e-19 | 1.00000 |
| rad53     | 1.49789e-21 | 1.00000 | 1.49789e-21 | 1.00000 |
| rad64     | 1.20509e-22 | 1.00000 | 1.20509e-22 | 1.00000 |
| rad61     | 5.26501e-24 | 1.00000 | 5.26501e-24 | 1.00000 |
| rad47     | 4.34786e-25 | 1.00000 | 4.34786e-25 | 1.00000 |
| rad56     | 3.01148e-26 | 1.00000 | 3.01148e-26 | 1.00000 |
| rad68syn  | 2.61656e-27 | 1.00000 | 2.61656e-27 | 1.00000 |
| rad68anti | 2.10233e-27 | 1.00000 | 2.10233e-27 | 1.00000 |
| rad40syn  | 4.17435e-31 | 1.00000 | 4.17435e-31 | 1.00000 |
| rad40anti | 3.31930e-31 | 1.00000 | 3.31930e-31 | 1.00000 |
| rad73     | 2.48138e-32 | 1.00000 | 2.48138e-32 | 1.00000 |
| PAH8+H    | 2.06743e-33 | 1.00000 | 2.06743e-33 | 1.00000 |
| rad19syn  | 2.10405e-36 | 1.00000 | 2.10405e-36 | 1.00000 |
| rad71     | 8.48823e-37 | 1.00000 | 8.48823e-37 | 1.00000 |
| rad8      | 1.84981e-54 | 1.00000 | 1.84981e-54 | 1.00000 |

10.0000000 Pa, 140.000000 K

| Rate constant             | True (fraction)        | Effective (fraction)   |
|---------------------------|------------------------|------------------------|
| Total                     | 4.99515e-15 (1.00 )    | 4.99515e-15 (1.00 )    |
| Formation of rad19        | 4.99514e-15 (1.000 )   | 4.99514e-15 (1.000 )   |
| H-abstraction to cyc2enyl | 5.62488e-21 (1.13e-06) | 5.62488e-21 (1.13e-06) |
| H-abstraction to cyclenyl | 3.00047e-26 (6.01e-12) | 3.00047e-26 (6.01e-12) |

| species                       | PYtrue      | Cumul    | PYeffective | Cumul    |
|-------------------------------|-------------|----------|-------------|----------|
| Indene+H                      | 0.999680    | 0.999680 | 0.999680    | 0.999680 |
| PhCHCCH2+H                    | 0.000263615 | 0.999943 | 0.000263615 | 0.999943 |
| rad9                          | 3.41990e-05 | 0.999978 | 3.41990e-05 | 0.999978 |
| rad6                          | 1.03791e-05 | 0.999988 | 1.03791e-05 | 0.999988 |
| PhCCH+CH3                     | 3.79338e-06 | 0.999992 | 3.79338e-06 | 0.999992 |
| PhCCCH3+H                     | 2.51778e-06 | 0.999994 | 2.51778e-06 | 0.999994 |
| Ph+MeAc                       | 1.92670e-06 | 0.999996 | 1.92670e-06 | 0.999996 |
| C2H2+PhCH2                    | 1.79748e-06 | 0.999998 | 1.79748e-06 | 0.999998 |
| Benzene+cycloprop-2-enylidene | 1.12607e-06 | 0.999999 | 1.12607e-06 | 0.999999 |
| rad67                         | 6.22292e-07 | 1.000000 | 6.22292e-07 | 1.000000 |
| rad35                         | 2.72174e-07 | 1.000000 | 2.72174e-07 | 1.000000 |
| Ph+Allene                     | 5.08986e-08 | 1.000000 | 5.08986e-08 | 1.000000 |
| rad15                         | 2.67383e-08 | 1.000000 | 2.67383e-08 | 1.000000 |
| rad2                          | 1.72663e-08 | 1.000000 | 1.72663e-08 | 1.000000 |
| rad28                         | 1.44762e-08 | 1.000000 | 1.44762e-08 | 1.000000 |
| rad26                         | 1.14503e-08 | 1.000000 | 1.14503e-08 | 1.000000 |
| PhCH2CCH+H                    | 7.34090e-09 | 1.000000 | 7.34090e-09 | 1.000000 |
| rad37                         | 6.10603e-09 | 1.000000 | 6.10603e-09 | 1.000000 |
| rad30                         | 4.84081e-09 | 1.000000 | 4.84081e-09 | 1.000000 |
| PAH7+H                        | 4.02285e-09 | 1.000000 | 4.02285e-09 | 1.000000 |
| rad7                          | 2.38670e-09 | 1.000000 | 2.38670e-09 | 1.000000 |
| rad10                         | 1.41016e-09 | 1.000000 | 1.41016e-09 | 1.000000 |
| rad1                          | 1.12683e-09 | 1.000000 | 1.12683e-09 | 1.000000 |
| rad39                         | 1.12332e-09 | 1.000000 | 1.12332e-09 | 1.000000 |
| rad11                         | 8.39122e-10 | 1.000000 | 8.39122e-10 | 1.000000 |
| rad23                         | 7.01746e-10 | 1.000000 | 7.01746e-10 | 1.000000 |
| rad3                          | 1.93343e-10 | 1.000000 | 1.93343e-10 | 1.000000 |
| PAH9+H                        | 1.66272e-10 | 1.000000 | 1.66272e-10 | 1.000000 |
| rad4                          | 9.84205e-11 | 1.000000 | 9.84205e-11 | 1.000000 |
| rad38                         | 8.18815e-11 | 1.000000 | 8.18815e-11 | 1.000000 |
| rad45                         | 2.85375e-11 | 1.000000 | 2.85375e-11 | 1.000000 |
| rad60syn                      | 2.36320e-11 | 1.000000 | 2.36320e-11 | 1.000000 |
| rad60anti                     | 1.16631e-11 | 1.000000 | 1.16631e-11 | 1.000000 |
| PAH3+H                        | 1.09751e-11 | 1.000000 | 1.09751e-11 | 1.000000 |
| PAH10+CH3                     | 1.04582e-11 | 1.000000 | 1.04582e-11 | 1.000000 |
| rad13                         | 7.32030e-12 | 1.000000 | 7.32030e-12 | 1.000000 |
| Benzene+cycloprop-1-enylidene | 6.00677e-12 | 1.000000 | 6.00677e-12 | 1.000000 |
| rad46                         | 4.36340e-12 | 1.000000 | 4.36340e-12 | 1.000000 |
| PhcycC3H3_A+H                 | 3.66485e-12 | 1.000000 | 3.66485e-12 | 1.000000 |
| rad22                         | 2.63278e-12 | 1.000000 | 2.63278e-12 | 1.000000 |
| rad59                         | 2.22267e-12 | 1.000000 | 2.22267e-12 | 1.000000 |
| rad36                         | 1.75148e-12 | 1.000000 | 1.75148e-12 | 1.000000 |
| rad43                         | 4.65800e-13 | 1.000000 | 4.65800e-13 | 1.000000 |
| rad12                         | 1.72069e-13 | 1.000000 | 1.72069e-13 | 1.000000 |
| rad62                         | 8.61153e-14 | 1.000000 | 8.61153e-14 | 1.000000 |
| rad54                         | 6.37399e-14 | 1.000000 | 6.37399e-14 | 1.000000 |
| rad50                         | 3.43107e-14 | 1.000000 | 3.43107e-14 | 1.000000 |
| rad19anti                     | 3.02980e-14 | 1.000000 | 3.02980e-14 | 1.000000 |
| rad14                         | 2.05802e-14 | 1.000000 | 2.05802e-14 | 1.000000 |
| Phenyl+cycC3H4                | 1.75978e-14 | 1.000000 | 0.000000    | 1.000000 |
| rad27                         | 1.57624e-14 | 1.000000 | 1.57624e-14 | 1.000000 |
| rad33                         | 9.43556e-15 | 1.000000 | 9.43556e-15 | 1.000000 |
| rad25                         | 5.83174e-15 | 1.000000 | 5.83174e-15 | 1.000000 |

|               |             |         |             |         |
|---------------|-------------|---------|-------------|---------|
| rad70         | 2.27390e-15 | 1.00000 | 2.27390e-15 | 1.00000 |
| PhcycC3H3_B+H | 1.94836e-15 | 1.00000 | 1.94836e-15 | 1.00000 |
| PAH1+H        | 1.05398e-15 | 1.00000 | 1.05398e-15 | 1.00000 |
| rad55         | 5.28396e-16 | 1.00000 | 5.28396e-16 | 1.00000 |
| rad52         | 2.54127e-16 | 1.00000 | 2.54127e-16 | 1.00000 |
| rad58         | 2.33837e-16 | 1.00000 | 2.33837e-16 | 1.00000 |
| rad5          | 2.33243e-16 | 1.00000 | 2.33243e-16 | 1.00000 |
| rad18         | 9.76362e-17 | 1.00000 | 9.76362e-17 | 1.00000 |
| rad51         | 7.58537e-17 | 1.00000 | 7.58537e-17 | 1.00000 |
| rad34         | 3.37930e-17 | 1.00000 | 3.37930e-17 | 1.00000 |
| rad41         | 2.17110e-17 | 1.00000 | 2.17110e-17 | 1.00000 |
| rad42         | 1.43355e-17 | 1.00000 | 1.43355e-17 | 1.00000 |
| rad20         | 1.37164e-17 | 1.00000 | 1.37164e-17 | 1.00000 |
| rad21         | 8.61080e-18 | 1.00000 | 8.61080e-18 | 1.00000 |
| rad65         | 1.67221e-18 | 1.00000 | 1.67221e-18 | 1.00000 |
| rad31         | 4.20209e-19 | 1.00000 | 4.20209e-19 | 1.00000 |
| rad24         | 2.27114e-19 | 1.00000 | 2.27114e-19 | 1.00000 |
| rad53         | 3.55920e-21 | 1.00000 | 3.55920e-21 | 1.00000 |
| rad64         | 3.57121e-22 | 1.00000 | 3.57121e-22 | 1.00000 |
| rad61         | 2.60402e-23 | 1.00000 | 2.60402e-23 | 1.00000 |
| rad47         | 4.39792e-25 | 1.00000 | 4.39792e-25 | 1.00000 |
| rad56         | 1.98508e-25 | 1.00000 | 1.98508e-25 | 1.00000 |
| rad68syn      | 1.95140e-26 | 1.00000 | 1.95140e-26 | 1.00000 |
| rad68anti     | 1.55975e-26 | 1.00000 | 1.55975e-26 | 1.00000 |
| rad40syn      | 7.00814e-30 | 1.00000 | 7.00814e-30 | 1.00000 |
| rad40anti     | 5.60648e-30 | 1.00000 | 5.60648e-30 | 1.00000 |
| rad73         | 3.41345e-31 | 1.00000 | 3.41345e-31 | 1.00000 |
| PAH8+H        | 6.01142e-32 | 1.00000 | 6.01142e-32 | 1.00000 |
| rad71         | 3.09040e-35 | 1.00000 | 3.09040e-35 | 1.00000 |
| rad19syn      | 4.98198e-36 | 1.00000 | 4.98198e-36 | 1.00000 |
| rad8          | 2.28484e-54 | 1.00000 | 2.28484e-54 | 1.00000 |

10.000000 Pa, 150.000000 K

=====

| Rate constant             | True (fraction)        | Effective (fraction)   |
|---------------------------|------------------------|------------------------|
| Total                     | 6.34137e-15 (1.00 )    | 6.34137e-15 (1.00 )    |
| Formation of rad19        | 6.34135e-15 (1.000 )   | 6.34135e-15 (1.000 )   |
| H-abstraction to cyc2enyl | 1.81685e-20 (2.87e-06) | 1.81685e-20 (2.87e-06) |
| H-abstraction to cyclenyl | 2.23765e-25 (3.53e-11) | 2.23765e-25 (3.53e-11) |

| species                       | PYtrue      | Cumul    | PYeffective | Cumul    |
|-------------------------------|-------------|----------|-------------|----------|
| Indene+H                      | 0.999680    | 0.999680 | 0.999680    | 0.999680 |
| PhCHCCH2+H                    | 0.000273212 | 0.999953 | 0.000273212 | 0.999953 |
| rad9                          | 2.21590e-05 | 0.999976 | 2.21590e-05 | 0.999976 |
| rad6                          | 1.03982e-05 | 0.999986 | 1.03982e-05 | 0.999986 |
| PhCCH+CH3                     | 3.96449e-06 | 0.999990 | 3.96449e-06 | 0.999990 |
| Benzene+cycloprop-2-enylidene | 2.86508e-06 | 0.999993 | 2.86508e-06 | 0.999993 |
| PhCCCH3+H                     | 2.63479e-06 | 0.999995 | 2.63479e-06 | 0.999995 |
| Ph+MeAc                       | 2.03713e-06 | 0.999997 | 2.03713e-06 | 0.999997 |
| C2H2+PhCH2                    | 1.93139e-06 | 0.999999 | 1.93139e-06 | 0.999999 |
| rad67                         | 6.53476e-07 | 1.000000 | 6.53476e-07 | 1.000000 |
| rad35                         | 2.85255e-07 | 1.00000  | 2.85255e-07 | 1.00000  |
| Ph+Allene                     | 5.82954e-08 | 1.00000  | 5.82954e-08 | 1.00000  |
| rad15                         | 1.71935e-08 | 1.00000  | 1.71935e-08 | 1.00000  |
| rad2                          | 1.55497e-08 | 1.00000  | 1.55497e-08 | 1.00000  |
| rad28                         | 1.45930e-08 | 1.00000  | 1.45930e-08 | 1.00000  |
| rad26                         | 8.86846e-09 | 1.00000  | 8.86846e-09 | 1.00000  |
| PhCH2CCH+H                    | 8.42389e-09 | 1.00000  | 8.42389e-09 | 1.00000  |
| rad37                         | 6.56030e-09 | 1.00000  | 6.56030e-09 | 1.00000  |
| rad30                         | 5.08736e-09 | 1.00000  | 5.08736e-09 | 1.00000  |
| PAH7+H                        | 4.80252e-09 | 1.00000  | 4.80252e-09 | 1.00000  |
| rad7                          | 2.36337e-09 | 1.00000  | 2.36337e-09 | 1.00000  |
| rad39                         | 1.34241e-09 | 1.00000  | 1.34241e-09 | 1.00000  |
| rad10                         | 1.26320e-09 | 1.00000  | 1.26320e-09 | 1.00000  |
| rad1                          | 1.01990e-09 | 1.00000  | 1.01990e-09 | 1.00000  |
| rad11                         | 8.27488e-10 | 1.00000  | 8.27488e-10 | 1.00000  |
| rad23                         | 6.64777e-10 | 1.00000  | 6.64777e-10 | 1.00000  |
| PAH9+H                        | 1.82352e-10 | 1.00000  | 1.82352e-10 | 1.00000  |
| rad3                          | 1.76542e-10 | 1.00000  | 1.76542e-10 | 1.00000  |
| rad38                         | 9.03447e-11 | 1.00000  | 9.03447e-11 | 1.00000  |
| rad4                          | 8.99857e-11 | 1.00000  | 8.99857e-11 | 1.00000  |
| Benzene+cycloprop-1-enylidene | 3.52865e-11 | 1.00000  | 3.52865e-11 | 1.00000  |
| rad45                         | 2.66632e-11 | 1.00000  | 2.66632e-11 | 1.00000  |
| rad60syn                      | 2.53140e-11 | 1.00000  | 2.53140e-11 | 1.00000  |
| rad60anti                     | 1.25146e-11 | 1.00000  | 1.25146e-11 | 1.00000  |
| PAH10+CH3                     | 1.21134e-11 | 1.00000  | 1.21134e-11 | 1.00000  |
| PAH3+H                        | 1.20435e-11 | 1.00000  | 1.20435e-11 | 1.00000  |
| rad13                         | 7.24979e-12 | 1.00000  | 7.24979e-12 | 1.00000  |

|                |             |         |             |         |
|----------------|-------------|---------|-------------|---------|
| rad46          | 4.84087e-12 | 1.00000 | 4.84087e-12 | 1.00000 |
| PhcycC3H3_A+H  | 4.67156e-12 | 1.00000 | 4.67156e-12 | 1.00000 |
| rad22          | 2.43619e-12 | 1.00000 | 2.43619e-12 | 1.00000 |
| rad59          | 2.42987e-12 | 1.00000 | 2.42987e-12 | 1.00000 |
| rad36          | 1.63838e-12 | 1.00000 | 1.63838e-12 | 1.00000 |
| rad43          | 5.26046e-13 | 1.00000 | 5.26046e-13 | 1.00000 |
| rad12          | 1.12342e-13 | 1.00000 | 1.12342e-13 | 1.00000 |
| rad62          | 9.77272e-14 | 1.00000 | 9.77272e-14 | 1.00000 |
| rad54          | 8.10030e-14 | 1.00000 | 8.10030e-14 | 1.00000 |
| rad50          | 3.94240e-14 | 1.00000 | 3.94240e-14 | 1.00000 |
| Phenyl+cycC3H4 | 2.61242e-14 | 1.00000 | 0.00000     | 1.00000 |
| rad19anti      | 1.95757e-14 | 1.00000 | 1.95757e-14 | 1.00000 |
| rad14          | 1.86886e-14 | 1.00000 | 1.86886e-14 | 1.00000 |
| rad27          | 1.40578e-14 | 1.00000 | 1.40578e-14 | 1.00000 |
| rad33          | 9.41994e-15 | 1.00000 | 9.41994e-15 | 1.00000 |
| rad25          | 5.74526e-15 | 1.00000 | 5.74526e-15 | 1.00000 |
| PhcycC3H3_B+H  | 4.08244e-15 | 1.00000 | 4.08244e-15 | 1.00000 |
| rad70          | 2.85442e-15 | 1.00000 | 2.85442e-15 | 1.00000 |
| PAH1+H         | 1.38165e-15 | 1.00000 | 1.38165e-15 | 1.00000 |
| rad55          | 7.04455e-16 | 1.00000 | 7.04455e-16 | 1.00000 |
| rad52          | 3.00108e-16 | 1.00000 | 3.00108e-16 | 1.00000 |
| rad58          | 2.80941e-16 | 1.00000 | 2.80941e-16 | 1.00000 |
| rad5           | 1.85461e-16 | 1.00000 | 1.85461e-16 | 1.00000 |
| rad51          | 9.26318e-17 | 1.00000 | 9.26318e-17 | 1.00000 |
| rad18          | 8.51201e-17 | 1.00000 | 8.51201e-17 | 1.00000 |
| rad34          | 4.52643e-17 | 1.00000 | 4.52643e-17 | 1.00000 |
| rad41          | 2.90868e-17 | 1.00000 | 2.90868e-17 | 1.00000 |
| rad42          | 1.87337e-17 | 1.00000 | 1.87337e-17 | 1.00000 |
| rad20          | 1.25050e-17 | 1.00000 | 1.25050e-17 | 1.00000 |
| rad21          | 7.86014e-18 | 1.00000 | 7.86014e-18 | 1.00000 |
| rad65          | 2.07344e-18 | 1.00000 | 2.07344e-18 | 1.00000 |
| rad31          | 3.93637e-19 | 1.00000 | 3.93637e-19 | 1.00000 |
| rad24          | 2.13484e-19 | 1.00000 | 2.13484e-19 | 1.00000 |
| rad53          | 8.06376e-21 | 1.00000 | 8.06376e-21 | 1.00000 |
| rad64          | 9.80484e-22 | 1.00000 | 9.80484e-22 | 1.00000 |
| rad61          | 1.07724e-22 | 1.00000 | 1.07724e-22 | 1.00000 |
| rad56          | 1.07035e-24 | 1.00000 | 1.07035e-24 | 1.00000 |
| rad47          | 4.49991e-25 | 1.00000 | 4.49991e-25 | 1.00000 |
| rad68syn       | 1.15478e-25 | 1.00000 | 1.15478e-25 | 1.00000 |
| rad68anti      | 9.18087e-26 | 1.00000 | 9.18087e-26 | 1.00000 |
| rad40syn       | 8.21112e-29 | 1.00000 | 8.21112e-29 | 1.00000 |
| rad40anti      | 6.61262e-29 | 1.00000 | 6.61262e-29 | 1.00000 |
| rad73          | 3.45960e-30 | 1.00000 | 3.45960e-30 | 1.00000 |
| PAH8+H         | 1.12889e-30 | 1.00000 | 1.12889e-30 | 1.00000 |
| rad71          | 7.00587e-34 | 1.00000 | 7.00587e-34 | 1.00000 |
| rad19syn       | 1.23840e-35 | 1.00000 | 1.23840e-35 | 1.00000 |
| rad8           | 2.95680e-54 | 1.00000 | 2.95680e-54 | 1.00000 |

10.000000 Pa, 160.000000 K

=====

| Rate constant             | True (fraction)        | Effective (fraction)   |
|---------------------------|------------------------|------------------------|
| Total                     | 7.84423e-15 (1.00 )    | 7.84423e-15 (1.00 )    |
| Formation of rad19        | 7.84418e-15 (1.000 )   | 7.84418e-15 (1.000 )   |
| H-abstraction to cyc2enyl | 5.05321e-20 (6.44e-06) | 5.05321e-20 (6.44e-06) |
| H-abstraction to cyclenyl | 1.29479e-24 (1.65e-10) | 1.29479e-24 (1.65e-10) |

| species                       | PYtrue      | Cumul    | PYeffective | Cumul    |
|-------------------------------|-------------|----------|-------------|----------|
| Indene+H                      | 0.999673    | 0.999673 | 0.999673    | 0.999673 |
| PhCHCCH2+H                    | 0.000283406 | 0.999956 | 0.000283406 | 0.999956 |
| rad9                          | 1.46781e-05 | 0.999971 | 1.46781e-05 | 0.999971 |
| rad6                          | 1.04011e-05 | 0.999981 | 1.04011e-05 | 0.999981 |
| Benzene+cycloprop-2-enylidene | 6.44194e-06 | 0.999987 | 6.44194e-06 | 0.999987 |
| PhCCH+CH3                     | 4.14718e-06 | 0.999992 | 4.14718e-06 | 0.999992 |
| PhCCCH3+H                     | 2.75963e-06 | 0.999994 | 2.75963e-06 | 0.999994 |
| Ph+MeAc                       | 2.15625e-06 | 0.999997 | 2.15625e-06 | 0.999997 |
| C2H2+PhCH2                    | 2.07903e-06 | 0.999999 | 2.07903e-06 | 0.999999 |
| rad67                         | 6.87135e-07 | 0.999999 | 6.87135e-07 | 0.999999 |
| rad35                         | 2.99341e-07 | 1.000000 | 2.99341e-07 | 1.000000 |
| Ph+Allene                     | 6.69036e-08 | 1.000000 | 6.69036e-08 | 1.000000 |
| rad28                         | 1.46595e-08 | 1.000000 | 1.46595e-08 | 1.000000 |
| rad2                          | 1.43017e-08 | 1.000000 | 1.43017e-08 | 1.000000 |
| rad15                         | 1.13096e-08 | 1.000000 | 1.13096e-08 | 1.000000 |
| PhCH2CCH+H                    | 9.69991e-09 | 1.000000 | 9.69991e-09 | 1.000000 |
| rad37                         | 7.05378e-09 | 1.000000 | 7.05378e-09 | 1.000000 |
| rad26                         | 6.97044e-09 | 1.000000 | 6.97044e-09 | 1.000000 |
| PAH7+H                        | 5.70937e-09 | 1.000000 | 5.70937e-09 | 1.000000 |
| rad30                         | 5.35441e-09 | 1.000000 | 5.35441e-09 | 1.000000 |
| rad7                          | 2.33886e-09 | 1.000000 | 2.33886e-09 | 1.000000 |

|                               |             |          |             |          |
|-------------------------------|-------------|----------|-------------|----------|
| rad39                         | 1.59733e-09 | 1.000000 | 1.59733e-09 | 1.000000 |
| rad10                         | 1.15631e-09 | 1.000000 | 1.15631e-09 | 1.000000 |
| rad1                          | 9.43179e-10 | 1.000000 | 9.43179e-10 | 1.000000 |
| rad11                         | 8.15812e-10 | 1.000000 | 8.15812e-10 | 1.000000 |
| rad23                         | 6.31316e-10 | 1.000000 | 6.31316e-10 | 1.000000 |
| PAH9+H                        | 2.00546e-10 | 1.000000 | 2.00546e-10 | 1.000000 |
| Benzene+cycloprop-1-enylidene | 1.65062e-10 | 1.000000 | 1.65062e-10 | 1.000000 |
| rad3                          | 1.64179e-10 | 1.000000 | 1.64179e-10 | 1.000000 |
| rad38                         | 9.99501e-11 | 1.000000 | 9.99501e-11 | 1.000000 |
| rad4                          | 8.38040e-11 | 1.000000 | 8.38040e-11 | 1.000000 |
| rad60syn                      | 2.71808e-11 | 1.000000 | 2.71808e-11 | 1.000000 |
| rad45                         | 2.50050e-11 | 1.000000 | 2.50050e-11 | 1.000000 |
| PAH10+CH3                     | 1.40763e-11 | 1.000000 | 1.40763e-11 | 1.000000 |
| rad60anti                     | 1.34615e-11 | 1.000000 | 1.34615e-11 | 1.000000 |
| PAH3+H                        | 1.32647e-11 | 1.000000 | 1.32647e-11 | 1.000000 |
| rad13                         | 7.17713e-12 | 1.000000 | 7.17713e-12 | 1.000000 |
| PhcycC3H3_A+H                 | 5.99971e-12 | 1.000000 | 5.99971e-12 | 1.000000 |
| rad46                         | 5.38972e-12 | 1.000000 | 5.38972e-12 | 1.000000 |
| rad59                         | 2.66557e-12 | 1.000000 | 2.66557e-12 | 1.000000 |
| rad22                         | 2.26329e-12 | 1.000000 | 2.26329e-12 | 1.000000 |
| rad36                         | 1.53872e-12 | 1.000000 | 1.53872e-12 | 1.000000 |
| rad43                         | 5.96101e-13 | 1.000000 | 5.96101e-13 | 1.000000 |
| rad62                         | 1.11295e-13 | 1.000000 | 1.11295e-13 | 1.000000 |
| rad54                         | 1.03299e-13 | 1.000000 | 1.03299e-13 | 1.000000 |
| rad12                         | 7.50237e-14 | 1.000000 | 7.50237e-14 | 1.000000 |
| rad50                         | 4.55734e-14 | 1.000000 | 4.55734e-14 | 1.000000 |
| Phenyl+cycC3H4                | 3.86829e-14 | 1.000000 | 0.000000    | 1.000000 |
| rad14                         | 1.72917e-14 | 1.000000 | 1.72917e-14 | 1.000000 |
| rad19anti                     | 1.29580e-14 | 1.000000 | 1.29580e-14 | 1.000000 |
| rad27                         | 1.28181e-14 | 1.000000 | 1.28181e-14 | 1.000000 |
| rad33                         | 9.39910e-15 | 1.000000 | 9.39910e-15 | 1.000000 |
| PhcycC3H3_B+H                 | 8.11381e-15 | 1.000000 | 8.11381e-15 | 1.000000 |
| rad25                         | 5.66113e-15 | 1.000000 | 5.66113e-15 | 1.000000 |
| rad70                         | 3.61773e-15 | 1.000000 | 3.61773e-15 | 1.000000 |
| PAH1+H                        | 1.82511e-15 | 1.000000 | 1.82511e-15 | 1.000000 |
| rad55                         | 9.44438e-16 | 1.000000 | 9.44438e-16 | 1.000000 |
| rad52                         | 3.57230e-16 | 1.000000 | 3.57230e-16 | 1.000000 |
| rad58                         | 3.40288e-16 | 1.000000 | 3.40288e-16 | 1.000000 |
| rad5                          | 1.52193e-16 | 1.000000 | 1.52193e-16 | 1.000000 |
| rad51                         | 1.14272e-16 | 1.000000 | 1.14272e-16 | 1.000000 |
| rad18                         | 7.50243e-17 | 1.000000 | 7.50243e-17 | 1.000000 |
| rad34                         | 6.13642e-17 | 1.000000 | 6.13642e-17 | 1.000000 |
| rad41                         | 3.91660e-17 | 1.000000 | 3.91660e-17 | 1.000000 |
| rad42                         | 2.46103e-17 | 1.000000 | 2.46103e-17 | 1.000000 |
| rad20                         | 1.15207e-17 | 1.000000 | 1.15207e-17 | 1.000000 |
| rad21                         | 7.25025e-18 | 1.000000 | 7.25025e-18 | 1.000000 |
| rad65                         | 2.59867e-18 | 1.000000 | 2.59867e-18 | 1.000000 |
| rad31                         | 3.77686e-19 | 1.000000 | 3.77686e-19 | 1.000000 |
| rad24                         | 2.01510e-19 | 1.000000 | 2.01510e-19 | 1.000000 |
| rad53                         | 1.75710e-20 | 1.000000 | 1.75710e-20 | 1.000000 |
| rad64                         | 2.52329e-21 | 1.000000 | 2.52329e-21 | 1.000000 |
| rad61                         | 3.85758e-22 | 1.000000 | 3.85758e-22 | 1.000000 |
| rad56                         | 4.88688e-24 | 1.000000 | 4.88688e-24 | 1.000000 |
| rad68syn                      | 5.65829e-25 | 1.000000 | 5.65829e-25 | 1.000000 |
| rad47                         | 4.65499e-25 | 1.000000 | 4.65499e-25 | 1.000000 |
| rad68anti                     | 4.47293e-25 | 1.000000 | 4.47293e-25 | 1.000000 |
| rad40syn                      | 7.19491e-28 | 1.000000 | 7.19491e-28 | 1.000000 |
| rad40anti                     | 5.83138e-28 | 1.000000 | 5.83138e-28 | 1.000000 |
| rad73                         | 2.73120e-29 | 1.000000 | 2.73120e-29 | 1.000000 |
| PAH8+H                        | 1.49882e-29 | 1.000000 | 1.49882e-29 | 1.000000 |
| rad71                         | 1.10075e-32 | 1.000000 | 1.10075e-32 | 1.000000 |
| rad19syn                      | 3.23547e-35 | 1.000000 | 3.23547e-35 | 1.000000 |
| rad8                          | 3.98637e-54 | 1.000000 | 3.98637e-54 | 1.000000 |

10.000000 Pa, 170.000000 K

=====

| Rate constant             | True (fraction)        | Effective (fraction)   |
|---------------------------|------------------------|------------------------|
| Total                     | 9.49598e-15 (1.00 )    | 9.49598e-15 (1.00 )    |
| Formation of rad19        | 9.49586e-15 (1.000 )   | 9.49586e-15 (1.000 )   |
| H-abstraction to cyc2enyl | 1.24279e-19 (1.31e-05) | 1.24279e-19 (1.31e-05) |
| H-abstraction to cyclenyl | 6.08025e-24 (6.40e-10) | 6.08025e-24 (6.40e-10) |

| species                       | PYtrue      | Cumul    | PYeffective | Cumul    |
|-------------------------------|-------------|----------|-------------|----------|
| Indene+H                      | 0.999659    | 0.999659 | 0.999659    | 0.999659 |
| PhCHCCH2+H                    | 0.000294300 | 0.999953 | 0.000294300 | 0.999953 |
| Benzene+cycloprop-2-enylidene | 1.30875e-05 | 0.999966 | 1.30875e-05 | 0.999966 |
| rad6                          | 1.03867e-05 | 0.999977 | 1.03867e-05 | 0.999977 |
| rad9                          | 9.92023e-06 | 0.999987 | 9.92023e-06 | 0.999987 |

|                               |             |          |             |          |
|-------------------------------|-------------|----------|-------------|----------|
| PhCCH+CH3                     | 4.34353e-06 | 0.999991 | 4.34353e-06 | 0.999991 |
| PhCCCH3+H                     | 2.89375e-06 | 0.999994 | 2.89375e-06 | 0.999994 |
| Ph+MeAc                       | 2.28562e-06 | 0.999996 | 2.28562e-06 | 0.999996 |
| C2H2+PhCH2                    | 2.24264e-06 | 0.999998 | 2.24264e-06 | 0.999998 |
| rad67                         | 7.23685e-07 | 0.999999 | 7.23685e-07 | 0.999999 |
| rad35                         | 3.14602e-07 | 0.999999 | 3.14602e-07 | 0.999999 |
| Ph+Allene                     | 7.69806e-08 | 0.999999 | 7.69806e-08 | 0.999999 |
| rad28                         | 1.46795e-08 | 1.000000 | 1.46795e-08 | 1.000000 |
| rad2                          | 1.33772e-08 | 1.000000 | 1.33772e-08 | 1.000000 |
| PhCH2CCH+H                    | 1.12135e-08 | 1.000000 | 1.12135e-08 | 1.000000 |
| rad37                         | 7.59460e-09 | 1.000000 | 7.59460e-09 | 1.000000 |
| rad15                         | 7.59450e-09 | 1.000000 | 7.59450e-09 | 1.000000 |
| PAH7+H                        | 6.76776e-09 | 1.000000 | 6.76776e-09 | 1.000000 |
| rad30                         | 5.64547e-09 | 1.000000 | 5.64547e-09 | 1.000000 |
| rad26                         | 5.56420e-09 | 1.000000 | 5.56420e-09 | 1.000000 |
| rad7                          | 2.31263e-09 | 1.000000 | 2.31263e-09 | 1.000000 |
| rad39                         | 1.89496e-09 | 1.000000 | 1.89496e-09 | 1.000000 |
| rad10                         | 1.07701e-09 | 1.000000 | 1.07701e-09 | 1.000000 |
| rad1                          | 8.87467e-10 | 1.000000 | 8.87467e-10 | 1.000000 |
| rad11                         | 8.03857e-10 | 1.000000 | 8.03857e-10 | 1.000000 |
| Benzene+cycloprop-1-enylidene | 6.40297e-10 | 1.000000 | 6.40297e-10 | 1.000000 |
| rad23                         | 6.00650e-10 | 1.000000 | 6.00650e-10 | 1.000000 |
| PAH9+H                        | 2.21268e-10 | 1.000000 | 2.21268e-10 | 1.000000 |
| rad3                          | 1.54854e-10 | 1.000000 | 1.54854e-10 | 1.000000 |
| rad38                         | 1.10933e-10 | 1.000000 | 1.10933e-10 | 1.000000 |
| rad4                          | 7.91694e-11 | 1.000000 | 7.91694e-11 | 1.000000 |
| rad60syn                      | 2.92666e-11 | 1.000000 | 2.92666e-11 | 1.000000 |
| rad45                         | 2.35193e-11 | 1.000000 | 2.35193e-11 | 1.000000 |
| PAH10+CH3                     | 1.64247e-11 | 1.000000 | 1.64247e-11 | 1.000000 |
| PAH3+H                        | 1.46712e-11 | 1.000000 | 1.46712e-11 | 1.000000 |
| rad60anti                     | 1.45218e-11 | 1.000000 | 1.45218e-11 | 1.000000 |
| PhcycC3H3_A+H                 | 7.76139e-12 | 1.000000 | 7.76139e-12 | 1.000000 |
| rad13                         | 7.10045e-12 | 1.000000 | 7.10045e-12 | 1.000000 |
| rad46                         | 6.02539e-12 | 1.000000 | 6.02539e-12 | 1.000000 |
| rad59                         | 2.93567e-12 | 1.000000 | 2.93567e-12 | 1.000000 |
| rad22                         | 2.10935e-12 | 1.000000 | 2.10935e-12 | 1.000000 |
| rad36                         | 1.44983e-12 | 1.000000 | 1.44983e-12 | 1.000000 |
| rad43                         | 6.78196e-13 | 1.000000 | 6.78196e-13 | 1.000000 |
| rad54                         | 1.32315e-13 | 1.000000 | 1.32315e-13 | 1.000000 |
| rad62                         | 1.27274e-13 | 1.000000 | 1.27274e-13 | 1.000000 |
| Phenyl+cycC3H4                | 5.71891e-14 | 1.000000 | 0.000000    | 1.000000 |
| rad50                         | 5.30402e-14 | 1.000000 | 5.30402e-14 | 1.000000 |
| rad12                         | 5.11482e-14 | 1.000000 | 5.11482e-14 | 1.000000 |
| rad14                         | 1.62325e-14 | 1.000000 | 1.62325e-14 | 1.000000 |
| PhcycC3H3_B+H                 | 1.54559e-14 | 1.000000 | 1.54559e-14 | 1.000000 |
| rad27                         | 1.18973e-14 | 1.000000 | 1.18973e-14 | 1.000000 |
| rad33                         | 9.37080e-15 | 1.000000 | 9.37080e-15 | 1.000000 |
| rad19anti                     | 8.76996e-15 | 1.000000 | 8.76996e-15 | 1.000000 |
| rad25                         | 5.57728e-15 | 1.000000 | 5.57728e-15 | 1.000000 |
| rad70                         | 4.63144e-15 | 1.000000 | 4.63144e-15 | 1.000000 |
| PAH1+H                        | 2.43099e-15 | 1.000000 | 2.43099e-15 | 1.000000 |
| rad55                         | 1.27411e-15 | 1.000000 | 1.27411e-15 | 1.000000 |
| rad52                         | 4.28968e-16 | 1.000000 | 4.28968e-16 | 1.000000 |
| rad58                         | 4.15752e-16 | 1.000000 | 4.15752e-16 | 1.000000 |
| rad51                         | 1.42528e-16 | 1.000000 | 1.42528e-16 | 1.000000 |
| rad5                          | 1.28257e-16 | 1.000000 | 1.28257e-16 | 1.000000 |
| rad34                         | 8.41931e-17 | 1.000000 | 8.41931e-17 | 1.000000 |
| rad18                         | 6.67471e-17 | 1.000000 | 6.67471e-17 | 1.000000 |
| rad41                         | 5.30131e-17 | 1.000000 | 5.30131e-17 | 1.000000 |
| rad42                         | 3.25088e-17 | 1.000000 | 3.25088e-17 | 1.000000 |
| rad20                         | 1.07094e-17 | 1.000000 | 1.07094e-17 | 1.000000 |
| rad21                         | 6.74767e-18 | 1.000000 | 6.74767e-18 | 1.000000 |
| rad65                         | 3.29471e-18 | 1.000000 | 3.29471e-18 | 1.000000 |
| rad31                         | 3.69709e-19 | 1.000000 | 3.69709e-19 | 1.000000 |
| rad24                         | 1.90853e-19 | 1.000000 | 1.90853e-19 | 1.000000 |
| rad53                         | 3.70553e-20 | 1.000000 | 3.70553e-20 | 1.000000 |
| rad64                         | 6.14511e-21 | 1.000000 | 6.14511e-21 | 1.000000 |
| rad61                         | 1.22813e-21 | 1.000000 | 1.22813e-21 | 1.000000 |
| rad56                         | 1.94381e-23 | 1.000000 | 1.94381e-23 | 1.000000 |
| rad68syn                      | 2.37507e-24 | 1.000000 | 2.37507e-24 | 1.000000 |
| rad68anti                     | 1.86602e-24 | 1.000000 | 1.86602e-24 | 1.000000 |
| rad47                         | 4.86697e-25 | 1.000000 | 4.86697e-25 | 1.000000 |
| rad40syn                      | 4.97212e-27 | 1.000000 | 4.97212e-27 | 1.000000 |
| rad40anti                     | 4.05223e-27 | 1.000000 | 4.05223e-27 | 1.000000 |
| rad73                         | 1.75493e-28 | 1.000000 | 1.75493e-28 | 1.000000 |
| PAH8+H                        | 1.49723e-28 | 1.000000 | 1.49723e-28 | 1.000000 |
| rad71                         | 1.27741e-31 | 1.000000 | 1.27741e-31 | 1.000000 |
| rad19syn                      | 8.89221e-35 | 1.000000 | 8.89221e-35 | 1.000000 |
| rad8                          | 5.57069e-54 | 1.000000 | 5.57069e-54 | 1.000000 |

10.000000 Pa, 180.000000 K

| Rate constant             | True (fraction)        | Effective (fraction)   |
|---------------------------|------------------------|------------------------|
| Total                     | 1.12884e-14 (1.00 )    | 1.12884e-14 (1.00 )    |
| Formation of rad19        | 1.12881e-14 (1.000 )   | 1.12881e-14 (1.000 )   |
| H-abstraction to cyc2enyl | 2.75916e-19 (2.44e-05) | 2.75916e-19 (2.44e-05) |
| H-abstraction to cyclenyl | 2.39955e-23 (2.13e-09) | 2.39955e-23 (2.13e-09) |

| species                       | PYtrue      | Cumul    | PYeffective | Cumul    |
|-------------------------------|-------------|----------|-------------|----------|
| Indene+H                      | 0.999639    | 0.999639 | 0.999639    | 0.999639 |
| PhCHCCH2+H                    | 0.000306000 | 0.999945 | 0.000306000 | 0.999945 |
| Benzene+cycloprop-2-enylidene | 2.44424e-05 | 0.999969 | 2.44424e-05 | 0.999969 |
| rad6                          | 1.03528e-05 | 0.999979 | 1.03528e-05 | 0.999979 |
| rad9                          | 6.82946e-06 | 0.999986 | 6.82946e-06 | 0.999986 |
| PhCCH+CH3                     | 4.55568e-06 | 0.999991 | 4.55568e-06 | 0.999991 |
| PhCCCH3+H                     | 3.03862e-06 | 0.999994 | 3.03862e-06 | 0.999994 |
| Ph+MeAc                       | 2.42697e-06 | 0.999996 | 2.42697e-06 | 0.999996 |
| C2H2+PhCH2                    | 2.42477e-06 | 0.999999 | 2.42477e-06 | 0.999999 |
| rad67                         | 7.63575e-07 | 0.999999 | 7.63575e-07 | 0.999999 |
| rad35                         | 3.31219e-07 | 1.000000 | 3.31219e-07 | 1.000000 |
| Ph+Allene                     | 8.88361e-08 | 1.000000 | 8.88361e-08 | 1.000000 |
| rad28                         | 1.46552e-08 | 1.000000 | 1.46552e-08 | 1.000000 |
| PhCH2CCH+H                    | 1.30190e-08 | 1.000000 | 1.30190e-08 | 1.000000 |
| rad2                          | 1.26759e-08 | 1.000000 | 1.26759e-08 | 1.000000 |
| rad37                         | 8.19166e-09 | 1.000000 | 8.19166e-09 | 1.000000 |
| PAH7+H                        | 8.00659e-09 | 1.000000 | 8.00659e-09 | 1.000000 |
| rad30                         | 5.96438e-09 | 1.000000 | 5.96438e-09 | 1.000000 |
| rad15                         | 5.19721e-09 | 1.000000 | 5.19721e-09 | 1.000000 |
| rad26                         | 4.51443e-09 | 1.000000 | 4.51443e-09 | 1.000000 |
| rad7                          | 2.28409e-09 | 1.000000 | 2.28409e-09 | 1.000000 |
| rad39                         | 2.24337e-09 | 1.000000 | 2.24337e-09 | 1.000000 |
| Benzene+cycloprop-1-enylidene | 2.12567e-09 | 1.000000 | 2.12567e-09 | 1.000000 |
| rad10                         | 1.01672e-09 | 1.000000 | 1.01672e-09 | 1.000000 |
| rad1                          | 8.46396e-10 | 1.000000 | 8.46396e-10 | 1.000000 |
| rad11                         | 7.91387e-10 | 1.000000 | 7.91387e-10 | 1.000000 |
| rad23                         | 5.72201e-10 | 1.000000 | 5.72201e-10 | 1.000000 |
| PAH9+H                        | 2.45011e-10 | 1.000000 | 2.45011e-10 | 1.000000 |
| rad3                          | 1.47611e-10 | 1.000000 | 1.47611e-10 | 1.000000 |
| rad38                         | 1.23569e-10 | 1.000000 | 1.23569e-10 | 1.000000 |
| rad4                          | 7.55976e-11 | 1.000000 | 7.55976e-11 | 1.000000 |
| rad60syn                      | 3.16106e-11 | 1.000000 | 3.16106e-11 | 1.000000 |
| rad45                         | 2.21719e-11 | 1.000000 | 2.21719e-11 | 1.000000 |
| PAH10+CH3                     | 1.92558e-11 | 1.000000 | 1.92558e-11 | 1.000000 |
| PAH3+H                        | 1.63019e-11 | 1.000000 | 1.63019e-11 | 1.000000 |
| rad60anti                     | 1.57161e-11 | 1.000000 | 1.57161e-11 | 1.000000 |
| PhcycC3H3_A+H                 | 1.01084e-11 | 1.000000 | 1.01084e-11 | 1.000000 |
| rad13                         | 7.01778e-12 | 1.000000 | 7.01778e-12 | 1.000000 |
| rad46                         | 6.76645e-12 | 1.000000 | 6.76645e-12 | 1.000000 |
| rad59                         | 3.24715e-12 | 1.000000 | 3.24715e-12 | 1.000000 |
| rad22                         | 1.97069e-12 | 1.000000 | 1.97069e-12 | 1.000000 |
| rad36                         | 1.36961e-12 | 1.000000 | 1.36961e-12 | 1.000000 |
| rad43                         | 7.75045e-13 | 1.000000 | 7.75045e-13 | 1.000000 |
| rad54                         | 1.70317e-13 | 1.000000 | 1.70317e-13 | 1.000000 |
| rad62                         | 1.46224e-13 | 1.000000 | 1.46224e-13 | 1.000000 |
| Phenyl+cycC3H4                | 8.44565e-14 | 1.000000 | 0.000000    | 1.000000 |
| rad50                         | 6.21858e-14 | 1.000000 | 6.21858e-14 | 1.000000 |
| rad12                         | 3.55409e-14 | 1.000000 | 3.55409e-14 | 1.000000 |
| PhcycC3H3_B+H                 | 2.84373e-14 | 1.000000 | 2.84373e-14 | 1.000000 |
| rad14                         | 1.54046e-14 | 1.000000 | 1.54046e-14 | 1.000000 |
| rad27                         | 1.11963e-14 | 1.000000 | 1.11963e-14 | 1.000000 |
| rad33                         | 9.33257e-15 | 1.000000 | 9.33257e-15 | 1.000000 |
| rad19anti                     | 6.05850e-15 | 1.000000 | 6.05850e-15 | 1.000000 |
| rad70                         | 5.98927e-15 | 1.000000 | 5.98927e-15 | 1.000000 |
| rad25                         | 5.49171e-15 | 1.000000 | 5.49171e-15 | 1.000000 |
| PAH1+H                        | 3.26556e-15 | 1.000000 | 3.26556e-15 | 1.000000 |
| rad55                         | 1.72988e-15 | 1.000000 | 1.72988e-15 | 1.000000 |
| rad52                         | 5.19965e-16 | 1.000000 | 5.19965e-16 | 1.000000 |
| rad58                         | 5.12511e-16 | 1.000000 | 5.12511e-16 | 1.000000 |
| rad51                         | 1.79832e-16 | 1.000000 | 1.79832e-16 | 1.000000 |
| rad34                         | 1.16838e-16 | 1.000000 | 1.16838e-16 | 1.000000 |
| rad5                          | 1.10478e-16 | 1.000000 | 1.10478e-16 | 1.000000 |
| rad41                         | 7.21175e-17 | 1.000000 | 7.21175e-17 | 1.000000 |
| rad18                         | 5.98586e-17 | 1.000000 | 5.98586e-17 | 1.000000 |
| rad42                         | 4.31775e-17 | 1.000000 | 4.31775e-17 | 1.000000 |
| rad20                         | 1.00317e-17 | 1.000000 | 1.00317e-17 | 1.000000 |
| rad21                         | 6.32811e-18 | 1.000000 | 6.32811e-18 | 1.000000 |
| rad65                         | 4.22742e-18 | 1.000000 | 4.22742e-18 | 1.000000 |
| rad31                         | 3.67940e-19 | 1.000000 | 3.67940e-19 | 1.000000 |

|           |             |          |             |          |
|-----------|-------------|----------|-------------|----------|
| rad24     | 1.81247e-19 | 1.000000 | 1.81247e-19 | 1.000000 |
| rad53     | 7.59685e-20 | 1.000000 | 7.59685e-20 | 1.000000 |
| rad64     | 1.42689e-20 | 1.000000 | 1.42689e-20 | 1.000000 |
| rad61     | 3.54924e-21 | 1.000000 | 3.54924e-21 | 1.000000 |
| rad56     | 6.89137e-23 | 1.000000 | 6.89137e-23 | 1.000000 |
| rad68syn  | 8.77269e-24 | 1.000000 | 8.77269e-24 | 1.000000 |
| rad68anti | 6.84742e-24 | 1.000000 | 6.84742e-24 | 1.000000 |
| rad47     | 5.14250e-25 | 1.000000 | 5.14250e-25 | 1.000000 |
| rad40syn  | 2.82461e-26 | 1.000000 | 2.82461e-26 | 1.000000 |
| rad40anti | 2.31200e-26 | 1.000000 | 2.31200e-26 | 1.000000 |
| PAH8+H    | 1.18318e-27 | 1.000000 | 1.18318e-27 | 1.000000 |
| rad73     | 9.50286e-28 | 1.000000 | 9.50286e-28 | 1.000000 |
| rad71     | 1.15957e-30 | 1.000000 | 1.15957e-30 | 1.000000 |
| rad19syn  | 2.57219e-34 | 1.000000 | 2.57219e-34 | 1.000000 |
| rad8      | 8.03311e-54 | 1.000000 | 8.03311e-54 | 1.000000 |

10.0000000 Pa, 190.000000 K

| Rate constant             | True (fraction)        | Effective (fraction)   |
|---------------------------|------------------------|------------------------|
| Total                     | 1.32132e-14 (1.00 )    | 1.32132e-14 (1.00 )    |
| Formation of rad19        | 1.32126e-14 (1.000 )   | 1.32126e-14 (1.000 )   |
| H-abstraction to cyc2enyl | 5.62053e-19 (4.25e-05) | 5.62053e-19 (4.25e-05) |
| H-abstraction to cyclenyl | 8.18073e-23 (6.19e-09) | 8.18073e-23 (6.19e-09) |

| species                       | PYtrue      | Cumul    | PYeffective | Cumul    |
|-------------------------------|-------------|----------|-------------|----------|
| Indene+H                      | 0.999609    | 0.999609 | 0.999609    | 0.999609 |
| PhCHCCH2+H                    | 0.000318615 | 0.999928 | 0.000318615 | 0.999928 |
| Benzene+cycloprop-2-enylidene | 4.25373e-05 | 0.999971 | 4.25373e-05 | 0.999971 |
| rad6                          | 1.02978e-05 | 0.999981 | 1.02978e-05 | 0.999981 |
| PhCCH+CH3                     | 4.78582e-06 | 0.999986 | 4.78582e-06 | 0.999986 |
| rad9                          | 4.78256e-06 | 0.999990 | 4.78256e-06 | 0.999990 |
| PhCCCH3+H                     | 3.19577e-06 | 0.999994 | 3.19577e-06 | 0.999994 |
| C2H2+PhCH2                    | 2.62818e-06 | 0.999996 | 2.62818e-06 | 0.999996 |
| Ph+MeAc                       | 2.58212e-06 | 0.999999 | 2.58212e-06 | 0.999999 |
| rad67                         | 8.07293e-07 | 1.000000 | 8.07293e-07 | 1.000000 |
| rad35                         | 3.49388e-07 | 1.000000 | 3.49388e-07 | 1.000000 |
| Ph+Allene                     | 1.02841e-07 | 1.000000 | 1.02841e-07 | 1.000000 |
| PhCH2CCH+H                    | 1.51831e-08 | 1.000000 | 1.51831e-08 | 1.000000 |
| rad28                         | 1.45873e-08 | 1.000000 | 1.45873e-08 | 1.000000 |
| rad2                          | 1.21274e-08 | 1.000000 | 1.21274e-08 | 1.000000 |
| PAH7+H                        | 9.45978e-09 | 1.000000 | 9.45978e-09 | 1.000000 |
| rad37                         | 8.85481e-09 | 1.000000 | 8.85481e-09 | 1.000000 |
| rad30                         | 6.31532e-09 | 1.000000 | 6.31532e-09 | 1.000000 |
| Benzene+cycloprop-1-enylidene | 6.19133e-09 | 1.000000 | 6.19133e-09 | 1.000000 |
| rad26                         | 3.72482e-09 | 1.000000 | 3.72482e-09 | 1.000000 |
| rad15                         | 3.61938e-09 | 1.000000 | 3.61938e-09 | 1.000000 |
| rad39                         | 2.65206e-09 | 1.000000 | 2.65206e-09 | 1.000000 |
| rad7                          | 2.25263e-09 | 1.000000 | 2.25263e-09 | 1.000000 |
| rad10                         | 9.69470e-10 | 1.000000 | 9.69470e-10 | 1.000000 |
| rad1                          | 8.15483e-10 | 1.000000 | 8.15483e-10 | 1.000000 |
| rad11                         | 7.78163e-10 | 1.000000 | 7.78163e-10 | 1.000000 |
| rad23                         | 5.45495e-10 | 1.000000 | 5.45495e-10 | 1.000000 |
| PAH9+H                        | 2.72343e-10 | 1.000000 | 2.72343e-10 | 1.000000 |
| rad3                          | 1.41780e-10 | 1.000000 | 1.41780e-10 | 1.000000 |
| rad38                         | 1.38188e-10 | 1.000000 | 1.38188e-10 | 1.000000 |
| rad4                          | 7.27490e-11 | 1.000000 | 7.27490e-11 | 1.000000 |
| rad60syn                      | 3.42579e-11 | 1.000000 | 3.42579e-11 | 1.000000 |
| PAH10+CH3                     | 2.26917e-11 | 1.000000 | 2.26917e-11 | 1.000000 |
| rad45                         | 2.09355e-11 | 1.000000 | 2.09355e-11 | 1.000000 |
| PAH3+H                        | 1.82035e-11 | 1.000000 | 1.82035e-11 | 1.000000 |
| rad60anti                     | 1.70679e-11 | 1.000000 | 1.70679e-11 | 1.000000 |
| PhcycC3H3_A+H                 | 1.32459e-11 | 1.000000 | 1.32459e-11 | 1.000000 |
| rad46                         | 7.63523e-12 | 1.000000 | 7.63523e-12 | 1.000000 |
| rad13                         | 6.92711e-12 | 1.000000 | 6.92711e-12 | 1.000000 |
| rad59                         | 3.60841e-12 | 1.000000 | 3.60841e-12 | 1.000000 |
| rad22                         | 1.84438e-12 | 1.000000 | 1.84438e-12 | 1.000000 |
| rad36                         | 1.29637e-12 | 1.000000 | 1.29637e-12 | 1.000000 |
| rad43                         | 8.89962e-13 | 1.000000 | 8.89962e-13 | 1.000000 |
| rad54                         | 2.20336e-13 | 1.000000 | 2.20336e-13 | 1.000000 |
| rad62                         | 1.68830e-13 | 1.000000 | 1.68830e-13 | 1.000000 |
| Phenyl+cycC3H4                | 1.24603e-13 | 1.000000 | 0.000000    | 1.000000 |
| rad50                         | 7.34735e-14 | 1.000000 | 7.34735e-14 | 1.000000 |
| PhcycC3H3_B+H                 | 5.08317e-14 | 1.000000 | 5.08317e-14 | 1.000000 |
| rad12                         | 2.51363e-14 | 1.000000 | 2.51363e-14 | 1.000000 |
| rad14                         | 1.47343e-14 | 1.000000 | 1.47343e-14 | 1.000000 |
| rad27                         | 1.06462e-14 | 1.000000 | 1.06462e-14 | 1.000000 |
| rad33                         | 9.28185e-15 | 1.000000 | 9.28185e-15 | 1.000000 |
| rad70                         | 7.82094e-15 | 1.000000 | 7.82094e-15 | 1.000000 |

|           |             |         |             |         |
|-----------|-------------|---------|-------------|---------|
| rad25     | 5.40252e-15 | 1.00000 | 5.40252e-15 | 1.00000 |
| PAH1+H    | 4.42297e-15 | 1.00000 | 4.42297e-15 | 1.00000 |
| rad19anti | 4.26624e-15 | 1.00000 | 4.26624e-15 | 1.00000 |
| rad55     | 2.36291e-15 | 1.00000 | 2.36291e-15 | 1.00000 |
| rad58     | 6.37499e-16 | 1.00000 | 6.37499e-16 | 1.00000 |
| rad52     | 6.36415e-16 | 1.00000 | 6.36415e-16 | 1.00000 |
| rad51     | 2.29569e-16 | 1.00000 | 2.29569e-16 | 1.00000 |
| rad34     | 1.63827e-16 | 1.00000 | 1.63827e-16 | 1.00000 |
| rad41     | 9.85593e-17 | 1.00000 | 9.85593e-17 | 1.00000 |
| rad5      | 9.68573e-17 | 1.00000 | 9.68573e-17 | 1.00000 |
| rad42     | 5.76447e-17 | 1.00000 | 5.76447e-17 | 1.00000 |
| rad18     | 5.40455e-17 | 1.00000 | 5.40455e-17 | 1.00000 |
| rad20     | 9.45833e-18 | 1.00000 | 9.45833e-18 | 1.00000 |
| rad21     | 5.97347e-18 | 1.00000 | 5.97347e-18 | 1.00000 |
| rad65     | 5.48952e-18 | 1.00000 | 5.48952e-18 | 1.00000 |
| rad31     | 3.71205e-19 | 1.00000 | 3.71205e-19 | 1.00000 |
| rad24     | 1.72481e-19 | 1.00000 | 1.72481e-19 | 1.00000 |
| rad53     | 1.51879e-19 | 1.00000 | 1.51879e-19 | 1.00000 |
| rad64     | 3.17747e-20 | 1.00000 | 3.17747e-20 | 1.00000 |
| rad61     | 9.46335e-21 | 1.00000 | 9.46335e-21 | 1.00000 |
| rad56     | 2.21745e-22 | 1.00000 | 2.21745e-22 | 1.00000 |
| rad68syn  | 2.91238e-23 | 1.00000 | 2.91238e-23 | 1.00000 |
| rad68anti | 2.25767e-23 | 1.00000 | 2.25767e-23 | 1.00000 |
| rad47     | 5.49150e-25 | 1.00000 | 5.49150e-25 | 1.00000 |
| rad40syn  | 1.36265e-25 | 1.00000 | 1.36265e-25 | 1.00000 |
| rad40anti | 1.11864e-25 | 1.00000 | 1.11864e-25 | 1.00000 |
| PAH8+H    | 7.67611e-27 | 1.00000 | 7.67611e-27 | 1.00000 |
| rad73     | 4.45696e-27 | 1.00000 | 4.45696e-27 | 1.00000 |
| rad71     | 8.55146e-30 | 1.00000 | 8.55146e-30 | 1.00000 |
| rad19syn  | 7.83231e-34 | 1.00000 | 7.83231e-34 | 1.00000 |
| rad8      | 1.19090e-53 | 1.00000 | 1.19090e-53 | 1.00000 |

10.0000000 Pa, 200.000000 K

=====

| Rate constant             | True (fraction)        | Effective (fraction)   |
|---------------------------|------------------------|------------------------|
| Total                     | 1.52621e-14 (1.00 )    | 1.52621e-14 (1.00 )    |
| Formation of rad19        | 1.52610e-14 (1.000 )   | 1.52610e-14 (1.000 )   |
| H-abstraction to cyc2enyl | 1.06427e-18 (6.97e-05) | 1.06427e-18 (6.97e-05) |
| H-abstraction to cyclenyl | 2.46309e-22 (1.61e-08) | 2.46309e-22 (1.61e-08) |

| species                       | PYtrue      | Cumul    | PYeffective | Cumul    |
|-------------------------------|-------------|----------|-------------|----------|
| Indene+H                      | 0.999569    | 0.999569 | 0.999569    | 0.999569 |
| PhCHCCH2+H                    | 0.000332261 | 0.999902 | 0.000332261 | 0.999902 |
| Benzene+cycloprop-2-enylidene | 6.97330e-05 | 0.999971 | 6.97330e-05 | 0.999971 |
| rad6                          | 1.02190e-05 | 0.999981 | 1.02190e-05 | 0.999981 |
| PhCCH+CH3                     | 5.03622e-06 | 0.999987 | 5.03622e-06 | 0.999987 |
| rad9                          | 3.40278e-06 | 0.999990 | 3.40278e-06 | 0.999990 |
| PhCCCH3+H                     | 3.36684e-06 | 0.999993 | 3.36684e-06 | 0.999993 |
| C2H2+PhCH2                    | 2.85590e-06 | 0.999996 | 2.85590e-06 | 0.999996 |
| Ph+MeAc                       | 2.75303e-06 | 0.999999 | 2.75303e-06 | 0.999999 |
| rad67                         | 8.55363e-07 | 1.000000 | 8.55363e-07 | 1.000000 |
| rad35                         | 3.69319e-07 | 1.00000  | 3.69319e-07 | 1.00000  |
| Ph+Allene                     | 1.19433e-07 | 1.00000  | 1.19433e-07 | 1.00000  |
| PhCH2CCH+H                    | 1.77864e-08 | 1.00000  | 1.77864e-08 | 1.00000  |
| Benzene+cycloprop-1-enylidene | 1.61386e-08 | 1.00000  | 1.61386e-08 | 1.00000  |
| rad28                         | 1.44755e-08 | 1.00000  | 1.44755e-08 | 1.00000  |
| rad2                          | 1.16812e-08 | 1.00000  | 1.16812e-08 | 1.00000  |
| PAH7+H                        | 1.11667e-08 | 1.00000  | 1.11667e-08 | 1.00000  |
| rad37                         | 9.59505e-09 | 1.00000  | 9.59505e-09 | 1.00000  |
| rad30                         | 6.70285e-09 | 1.00000  | 6.70285e-09 | 1.00000  |
| rad39                         | 3.13206e-09 | 1.00000  | 3.13206e-09 | 1.00000  |
| rad26                         | 3.12615e-09 | 1.00000  | 3.12615e-09 | 1.00000  |
| rad15                         | 2.56186e-09 | 1.00000  | 2.56186e-09 | 1.00000  |
| rad7                          | 2.21767e-09 | 1.00000  | 2.21767e-09 | 1.00000  |
| rad10                         | 9.31026e-10 | 1.00000  | 9.31026e-10 | 1.00000  |
| rad1                          | 7.91509e-10 | 1.00000  | 7.91509e-10 | 1.00000  |
| rad11                         | 7.63961e-10 | 1.00000  | 7.63961e-10 | 1.00000  |
| rad23                         | 5.20140e-10 | 1.00000  | 5.20140e-10 | 1.00000  |
| PAH9+H                        | 3.03934e-10 | 1.00000  | 3.03934e-10 | 1.00000  |
| rad38                         | 1.55173e-10 | 1.00000  | 1.55173e-10 | 1.00000  |
| rad3                          | 1.36881e-10 | 1.00000  | 1.36881e-10 | 1.00000  |
| rad4                          | 7.03814e-11 | 1.00000  | 7.03814e-11 | 1.00000  |
| rad60syn                      | 3.72604e-11 | 1.00000  | 3.72604e-11 | 1.00000  |
| PAH10+CH3                     | 2.68857e-11 | 1.00000  | 2.68857e-11 | 1.00000  |
| PAH3+H                        | 2.04323e-11 | 1.00000  | 2.04323e-11 | 1.00000  |
| rad45                         | 1.97882e-11 | 1.00000  | 1.97882e-11 | 1.00000  |
| rad60anti                     | 1.86045e-11 | 1.00000  | 1.86045e-11 | 1.00000  |
| PhcycC3H3_A+H                 | 1.74507e-11 | 1.00000  | 1.74507e-11 | 1.00000  |



|                |             |         |             |         |
|----------------|-------------|---------|-------------|---------|
| rad46          | 8.65842e-12 | 1.00000 | 8.65842e-12 | 1.00000 |
| rad13          | 6.82648e-12 | 1.00000 | 6.82648e-12 | 1.00000 |
| rad59          | 4.02945e-12 | 1.00000 | 4.02945e-12 | 1.00000 |
| rad22          | 1.72810e-12 | 1.00000 | 1.72810e-12 | 1.00000 |
| rad36          | 1.22879e-12 | 1.00000 | 1.22879e-12 | 1.00000 |
| rad43          | 1.02698e-12 | 1.00000 | 1.02698e-12 | 1.00000 |
| rad54          | 2.86414e-13 | 1.00000 | 2.86414e-13 | 1.00000 |
| rad62          | 1.95930e-13 | 1.00000 | 1.95930e-13 | 1.00000 |
| Phenyl+cycC3H4 | 1.83626e-13 | 1.00000 | 0.00000     | 1.00000 |
| PhcycC3H3_B+H  | 8.86642e-14 | 1.00000 | 8.86642e-14 | 1.00000 |
| rad50          | 8.74978e-14 | 1.00000 | 8.74978e-14 | 1.00000 |
| rad12          | 1.80738e-14 | 1.00000 | 1.80738e-14 | 1.00000 |
| rad14          | 1.41694e-14 | 1.00000 | 1.41694e-14 | 1.00000 |
| rad70          | 1.03054e-14 | 1.00000 | 1.03054e-14 | 1.00000 |
| rad27          | 1.01988e-14 | 1.00000 | 1.01988e-14 | 1.00000 |
| rad33          | 9.21592e-15 | 1.00000 | 9.21592e-15 | 1.00000 |
| PAH1+H         | 6.03683e-15 | 1.00000 | 6.03683e-15 | 1.00000 |
| rad25          | 5.30791e-15 | 1.00000 | 5.30791e-15 | 1.00000 |
| rad55          | 3.24482e-15 | 1.00000 | 3.24482e-15 | 1.00000 |
| rad19anti      | 3.05878e-15 | 1.00000 | 3.05878e-15 | 1.00000 |
| rad58          | 7.99993e-16 | 1.00000 | 7.99993e-16 | 1.00000 |
| rad52          | 7.86585e-16 | 1.00000 | 7.86585e-16 | 1.00000 |
| rad51          | 2.96452e-16 | 1.00000 | 2.96452e-16 | 1.00000 |
| rad34          | 2.31772e-16 | 1.00000 | 2.31772e-16 | 1.00000 |
| rad41          | 1.35236e-16 | 1.00000 | 1.35236e-16 | 1.00000 |
| rad5           | 8.61031e-17 | 1.00000 | 8.61031e-17 | 1.00000 |
| rad42          | 7.73198e-17 | 1.00000 | 7.73198e-17 | 1.00000 |
| rad18          | 4.90751e-17 | 1.00000 | 4.90751e-17 | 1.00000 |
| rad20          | 8.96722e-18 | 1.00000 | 8.96722e-18 | 1.00000 |
| rad65          | 7.21164e-18 | 1.00000 | 7.21164e-18 | 1.00000 |
| rad21          | 5.67002e-18 | 1.00000 | 5.67002e-18 | 1.00000 |
| rad31          | 3.78744e-19 | 1.00000 | 3.78744e-19 | 1.00000 |
| rad53          | 2.96743e-19 | 1.00000 | 2.96743e-19 | 1.00000 |
| rad24          | 1.64383e-19 | 1.00000 | 1.64383e-19 | 1.00000 |
| rad64          | 6.81702e-20 | 1.00000 | 6.81702e-20 | 1.00000 |
| rad61          | 2.35798e-20 | 1.00000 | 2.35798e-20 | 1.00000 |
| rad56          | 6.56956e-22 | 1.00000 | 6.56956e-22 | 1.00000 |
| rad68syn       | 8.83649e-23 | 1.00000 | 8.83649e-23 | 1.00000 |
| rad68anti      | 6.80205e-23 | 1.00000 | 6.80205e-23 | 1.00000 |
| rad47          | 5.92784e-25 | 1.00000 | 5.92784e-25 | 1.00000 |
| rad40syn       | 5.72760e-25 | 1.00000 | 5.72760e-25 | 1.00000 |
| rad40anti      | 4.70927e-25 | 1.00000 | 4.70927e-25 | 1.00000 |
| PAH8+H         | 4.20918e-26 | 1.00000 | 4.20918e-26 | 1.00000 |
| rad73          | 1.85014e-26 | 1.00000 | 1.85014e-26 | 1.00000 |
| rad71          | 5.27454e-29 | 1.00000 | 5.27454e-29 | 1.00000 |
| rad19syn       | 2.51007e-33 | 1.00000 | 2.51007e-33 | 1.00000 |
| rad8           | 1.80948e-53 | 1.00000 | 1.80948e-53 | 1.00000 |

10.0000000 Pa, 210.000000 K

=====

| Rate constant             | True (fraction)        | Effective (fraction)   |
|---------------------------|------------------------|------------------------|
| Total                     | 1.74272e-14 (1.00 )    | 1.74272e-14 (1.00 )    |
| Formation of rad19        | 1.74253e-14 (1.000 )   | 1.74253e-14 (1.000 )   |
| H-abstraction to cyc2enyl | 1.89310e-18 (0.000109) | 1.89310e-18 (0.000109) |
| H-abstraction to cyclenyl | 6.66714e-22 (3.83e-08) | 6.66714e-22 (3.83e-08) |

| species                       | PYtrue      | Cumul    | PYeffective | Cumul    |
|-------------------------------|-------------|----------|-------------|----------|
| Indene+H                      | 0.999515    | 0.999515 | 0.999515    | 0.999515 |
| PhCHCCH2+H                    | 0.000347056 | 0.999862 | 0.000347056 | 0.999862 |
| Benzene+cycloprop-2-enylidene | 0.000108629 | 0.999971 | 0.000108629 | 0.999971 |
| rad6                          | 1.01142e-05 | 0.999981 | 1.01142e-05 | 0.999981 |
| PhCCH+CH3                     | 5.30924e-06 | 0.999986 | 5.30924e-06 | 0.999986 |
| PhCCCH3+H                     | 3.55348e-06 | 0.999990 | 3.55348e-06 | 0.999990 |
| C2H2+PhCH2                    | 3.11124e-06 | 0.999993 | 3.11124e-06 | 0.999993 |
| Ph+MeAc                       | 2.94184e-06 | 0.999996 | 2.94184e-06 | 0.999996 |
| rad9                          | 2.45742e-06 | 0.999999 | 2.45742e-06 | 0.999999 |
| rad67                         | 9.08358e-07 | 0.999999 | 9.08358e-07 | 0.999999 |
| rad35                         | 3.91239e-07 | 1.000000 | 3.91239e-07 | 1.000000 |
| Ph+Allene                     | 1.39131e-07 | 1.000000 | 1.39131e-07 | 1.000000 |
| Benzene+cycloprop-1-enylidene | 3.82571e-08 | 1.000000 | 3.82571e-08 | 1.000000 |
| PhCH2CCH+H                    | 2.09266e-08 | 1.000000 | 2.09266e-08 | 1.000000 |
| rad28                         | 1.43190e-08 | 1.000000 | 1.43190e-08 | 1.000000 |
| PAH7+H                        | 1.31729e-08 | 1.000000 | 1.31729e-08 | 1.000000 |
| rad2                          | 1.13009e-08 | 1.000000 | 1.13009e-08 | 1.000000 |
| rad37                         | 1.04247e-08 | 1.000000 | 1.04247e-08 | 1.000000 |
| rad30                         | 7.13199e-09 | 1.000000 | 7.13199e-09 | 1.000000 |
| rad39                         | 3.69602e-09 | 1.000000 | 3.69602e-09 | 1.000000 |
| rad26                         | 2.66825e-09 | 1.000000 | 2.66825e-09 | 1.000000 |

|                |             |         |             |         |
|----------------|-------------|---------|-------------|---------|
| rad7           | 2.17861e-09 | 1.00000 | 2.17861e-09 | 1.00000 |
| rad15          | 1.84117e-09 | 1.00000 | 1.84117e-09 | 1.00000 |
| rad10          | 8.98321e-10 | 1.00000 | 8.98321e-10 | 1.00000 |
| rad1           | 7.72120e-10 | 1.00000 | 7.72120e-10 | 1.00000 |
| rad11          | 7.48566e-10 | 1.00000 | 7.48566e-10 | 1.00000 |
| rad23          | 4.95812e-10 | 1.00000 | 4.95812e-10 | 1.00000 |
| PAH9+H         | 3.40553e-10 | 1.00000 | 3.40553e-10 | 1.00000 |
| rad38          | 1.74980e-10 | 1.00000 | 1.74980e-10 | 1.00000 |
| rad3           | 1.32569e-10 | 1.00000 | 1.32569e-10 | 1.00000 |
| rad4           | 6.83188e-11 | 1.00000 | 6.83188e-11 | 1.00000 |
| rad60syn       | 4.06776e-11 | 1.00000 | 4.06776e-11 | 1.00000 |
| PAH10+CH3      | 3.20301e-11 | 1.00000 | 3.20301e-11 | 1.00000 |
| PhcycC3H3_A+H  | 2.30949e-11 | 1.00000 | 2.30949e-11 | 1.00000 |
| PAH3+H         | 2.30564e-11 | 1.00000 | 2.30564e-11 | 1.00000 |
| rad60anti      | 2.03577e-11 | 1.00000 | 2.03577e-11 | 1.00000 |
| rad45          | 1.87125e-11 | 1.00000 | 1.87125e-11 | 1.00000 |
| rad46          | 9.86798e-12 | 1.00000 | 9.86798e-12 | 1.00000 |
| rad13          | 6.71401e-12 | 1.00000 | 6.71401e-12 | 1.00000 |
| rad59          | 4.52223e-12 | 1.00000 | 4.52223e-12 | 1.00000 |
| rad22          | 1.61996e-12 | 1.00000 | 1.61996e-12 | 1.00000 |
| rad43          | 1.19101e-12 | 1.00000 | 1.19101e-12 | 1.00000 |
| rad36          | 1.16577e-12 | 1.00000 | 1.16577e-12 | 1.00000 |
| rad54          | 3.73903e-13 | 1.00000 | 3.73903e-13 | 1.00000 |
| Phenyl+cycC3H4 | 2.70226e-13 | 1.00000 | 0.00000     | 1.00000 |
| rad62          | 2.28557e-13 | 1.00000 | 2.28557e-13 | 1.00000 |
| PhcycC3H3_B+H  | 1.51423e-13 | 1.00000 | 1.51423e-13 | 1.00000 |
| rad50          | 1.05020e-13 | 1.00000 | 1.05020e-13 | 1.00000 |
| rad70          | 1.36882e-14 | 1.00000 | 1.36882e-14 | 1.00000 |
| rad14          | 1.36724e-14 | 1.00000 | 1.36724e-14 | 1.00000 |
| rad12          | 1.31998e-14 | 1.00000 | 1.31998e-14 | 1.00000 |
| rad27          | 9.81925e-15 | 1.00000 | 9.81925e-15 | 1.00000 |
| rad33          | 9.13215e-15 | 1.00000 | 9.13215e-15 | 1.00000 |
| PAH1+H         | 8.29614e-15 | 1.00000 | 8.29614e-15 | 1.00000 |
| rad25          | 5.20622e-15 | 1.00000 | 5.20622e-15 | 1.00000 |
| rad55          | 4.47521e-15 | 1.00000 | 4.47521e-15 | 1.00000 |
| rad19anti      | 2.23091e-15 | 1.00000 | 2.23091e-15 | 1.00000 |
| rad58          | 1.01242e-15 | 1.00000 | 1.01242e-15 | 1.00000 |
| rad52          | 9.81506e-16 | 1.00000 | 9.81506e-16 | 1.00000 |
| rad51          | 3.87037e-16 | 1.00000 | 3.87037e-16 | 1.00000 |
| rad34          | 3.30284e-16 | 1.00000 | 3.30284e-16 | 1.00000 |
| rad41          | 1.86171e-16 | 1.00000 | 1.86171e-16 | 1.00000 |
| rad42          | 1.04130e-16 | 1.00000 | 1.04130e-16 | 1.00000 |
| rad5           | 7.73640e-17 | 1.00000 | 7.73640e-17 | 1.00000 |
| rad18          | 4.47721e-17 | 1.00000 | 4.47721e-17 | 1.00000 |
| rad65          | 9.57764e-18 | 1.00000 | 9.57764e-18 | 1.00000 |
| rad20          | 8.54120e-18 | 1.00000 | 8.54120e-18 | 1.00000 |
| rad21          | 5.40715e-18 | 1.00000 | 5.40715e-18 | 1.00000 |
| rad53          | 5.67492e-19 | 1.00000 | 5.67492e-19 | 1.00000 |
| rad31          | 3.90100e-19 | 1.00000 | 3.90100e-19 | 1.00000 |
| rad24          | 1.56813e-19 | 1.00000 | 1.56813e-19 | 1.00000 |
| rad64          | 1.41413e-19 | 1.00000 | 1.41413e-19 | 1.00000 |
| rad61          | 5.54659e-20 | 1.00000 | 5.54659e-20 | 1.00000 |
| rad56          | 1.81264e-21 | 1.00000 | 1.81264e-21 | 1.00000 |
| rad68syn       | 2.48298e-22 | 1.00000 | 2.48298e-22 | 1.00000 |
| rad68anti      | 1.89789e-22 | 1.00000 | 1.89789e-22 | 1.00000 |
| rad40syn       | 2.14074e-24 | 1.00000 | 2.14074e-24 | 1.00000 |
| rad40anti      | 1.76061e-24 | 1.00000 | 1.76061e-24 | 1.00000 |
| rad47          | 6.47061e-25 | 1.00000 | 6.47061e-25 | 1.00000 |
| PAH8+H         | 1.99570e-25 | 1.00000 | 1.99570e-25 | 1.00000 |
| rad73          | 6.91381e-26 | 1.00000 | 6.91381e-26 | 1.00000 |
| rad71          | 2.78263e-28 | 1.00000 | 2.78263e-28 | 1.00000 |
| rad19syn       | 8.46127e-33 | 1.00000 | 8.46127e-33 | 1.00000 |
| rad8           | 2.81094e-53 | 1.00000 | 2.81094e-53 | 1.00000 |

10.000000 Pa, 220.000000 K

=====

| Rate constant             | True (fraction)        | Effective (fraction)   |
|---------------------------|------------------------|------------------------|
| Total                     | 1.97009e-14 (1.00 )    | 1.97009e-14 (1.00 )    |
| Formation of rad19        | 1.96977e-14 (1.000 )   | 1.96977e-14 (1.000 )   |
| H-abstraction to cyc2enyl | 3.19064e-18 (0.000162) | 3.19064e-18 (0.000162) |
| H-abstraction to cyclenyl | 1.64627e-21 (8.36e-08) | 1.64627e-21 (8.36e-08) |

| species                       | PYtrue      | Cumul    | PYeffective | Cumul    |
|-------------------------------|-------------|----------|-------------|----------|
| Indene+H                      | 0.999445    | 0.999445 | 0.999445    | 0.999445 |
| PhCHCCH2+H                    | 0.000363125 | 0.999808 | 0.000363125 | 0.999808 |
| Benzene+cycloprop-2-enylidene | 0.000161954 | 0.999970 | 0.000161954 | 0.999970 |
| rad6                          | 9.98137e-06 | 0.999980 | 9.98137e-06 | 0.999980 |
| PhCCH+CH3                     | 5.60732e-06 | 0.999986 | 5.60732e-06 | 0.999986 |

|                               |             |          |             |          |
|-------------------------------|-------------|----------|-------------|----------|
| PhCCCH3+H                     | 3.75750e-06 | 0.999989 | 3.75750e-06 | 0.999989 |
| C2H2+PhCH2                    | 3.39777e-06 | 0.999993 | 3.39777e-06 | 0.999993 |
| Ph+MeAc                       | 3.15088e-06 | 0.999996 | 3.15088e-06 | 0.999996 |
| rad9                          | 1.79988e-06 | 0.999998 | 1.79988e-06 | 0.999998 |
| rad67                         | 9.66901e-07 | 0.999999 | 9.66901e-07 | 0.999999 |
| rad35                         | 4.15397e-07 | 0.999999 | 4.15397e-07 | 0.999999 |
| Ph+Allene                     | 1.62544e-07 | 0.999999 | 1.62544e-07 | 0.999999 |
| Benzene+cycloprop-1-enylidene | 8.35632e-08 | 0.999999 | 8.35632e-08 | 0.999999 |
| PhCH2CCH+H                    | 2.47207e-08 | 0.999999 | 2.47207e-08 | 0.999999 |
| PAH7+H                        | 1.55297e-08 | 0.999999 | 1.55297e-08 | 0.999999 |
| rad28                         | 1.41171e-08 | 0.999999 | 1.41171e-08 | 0.999999 |
| rad37                         | 1.13575e-08 | 0.999999 | 1.13575e-08 | 0.999999 |
| rad2                          | 1.09596e-08 | 1.000000 | 1.09596e-08 | 1.000000 |
| rad30                         | 7.60823e-09 | 1.000000 | 7.60823e-09 | 1.000000 |
| rad39                         | 4.35828e-09 | 1.000000 | 4.35828e-09 | 1.000000 |
| rad26                         | 2.31443e-09 | 1.000000 | 2.31443e-09 | 1.000000 |
| rad7                          | 2.13495e-09 | 1.000000 | 2.13495e-09 | 1.000000 |
| rad15                         | 1.34239e-09 | 1.000000 | 1.34239e-09 | 1.000000 |
| rad10                         | 8.69126e-10 | 1.000000 | 8.69126e-10 | 1.000000 |
| rad1                          | 7.55573e-10 | 1.000000 | 7.55573e-10 | 1.000000 |
| rad11                         | 7.31793e-10 | 1.000000 | 7.31793e-10 | 1.000000 |
| rad23                         | 4.72252e-10 | 1.000000 | 4.72252e-10 | 1.000000 |
| PAH9+H                        | 3.83095e-10 | 1.000000 | 3.83095e-10 | 1.000000 |
| rad38                         | 1.98139e-10 | 1.000000 | 1.98139e-10 | 1.000000 |
| rad3                          | 1.28588e-10 | 1.000000 | 1.28588e-10 | 1.000000 |
| rad4                          | 6.64318e-11 | 1.000000 | 6.64318e-11 | 1.000000 |
| rad60syn                      | 4.45785e-11 | 1.000000 | 4.45785e-11 | 1.000000 |
| PAH10+CH3                     | 3.83664e-11 | 1.000000 | 3.83664e-11 | 1.000000 |
| PhcycC3H3_A+H                 | 3.06773e-11 | 1.000000 | 3.06773e-11 | 1.000000 |
| PAH3+H                        | 2.61576e-11 | 1.000000 | 2.61576e-11 | 1.000000 |
| rad60anti                     | 2.23638e-11 | 1.000000 | 2.23638e-11 | 1.000000 |
| rad45                         | 1.76942e-11 | 1.000000 | 1.76942e-11 | 1.000000 |
| rad46                         | 1.13019e-11 | 1.000000 | 1.13019e-11 | 1.000000 |
| rad13                         | 6.58799e-12 | 1.000000 | 6.58799e-12 | 1.000000 |
| rad59                         | 5.10109e-12 | 1.000000 | 5.10109e-12 | 1.000000 |
| rad22                         | 1.51848e-12 | 1.000000 | 1.51848e-12 | 1.000000 |
| rad43                         | 1.38806e-12 | 1.000000 | 1.38806e-12 | 1.000000 |
| rad36                         | 1.10642e-12 | 1.000000 | 1.10642e-12 | 1.000000 |
| rad54                         | 4.89853e-13 | 1.000000 | 4.89853e-13 | 1.000000 |
| Phenyl+cycC3H4                | 3.96956e-13 | 1.000000 | 0.00000     | 1.000000 |
| rad62                         | 2.67967e-13 | 1.000000 | 2.67967e-13 | 1.000000 |
| PhcycC3H3_B+H                 | 2.53852e-13 | 1.000000 | 2.53852e-13 | 1.000000 |
| rad50                         | 1.27013e-13 | 1.000000 | 1.27013e-13 | 1.000000 |
| rad70                         | 1.83053e-14 | 1.000000 | 1.83053e-14 | 1.000000 |
| rad14                         | 1.32161e-14 | 1.000000 | 1.32161e-14 | 1.000000 |
| PAH1+H                        | 1.14673e-14 | 1.000000 | 1.14673e-14 | 1.000000 |
| rad12                         | 9.78384e-15 | 1.000000 | 9.78384e-15 | 1.000000 |
| rad27                         | 9.48235e-15 | 1.000000 | 9.48235e-15 | 1.000000 |
| rad33                         | 9.02804e-15 | 1.000000 | 9.02804e-15 | 1.000000 |
| rad55                         | 6.19164e-15 | 1.000000 | 6.19164e-15 | 1.000000 |
| rad25                         | 5.09595e-15 | 1.000000 | 5.09595e-15 | 1.000000 |
| rad19anti                     | 1.65402e-15 | 1.000000 | 1.65402e-15 | 1.000000 |
| rad58                         | 1.29143e-15 | 1.000000 | 1.29143e-15 | 1.000000 |
| rad52                         | 1.23587e-15 | 1.000000 | 1.23587e-15 | 1.000000 |
| rad51                         | 5.10429e-16 | 1.000000 | 5.10429e-16 | 1.000000 |
| rad34                         | 4.73247e-16 | 1.000000 | 4.73247e-16 | 1.000000 |
| rad41                         | 2.56934e-16 | 1.000000 | 2.56934e-16 | 1.000000 |
| rad42                         | 1.40696e-16 | 1.000000 | 1.40696e-16 | 1.000000 |
| rad5                          | 7.00671e-17 | 1.000000 | 7.00671e-17 | 1.000000 |
| rad18                         | 4.10030e-17 | 1.000000 | 4.10030e-17 | 1.000000 |
| rad65                         | 1.28458e-17 | 1.000000 | 1.28458e-17 | 1.000000 |
| rad20                         | 8.16679e-18 | 1.000000 | 8.16679e-18 | 1.000000 |
| rad21                         | 5.17650e-18 | 1.000000 | 5.17650e-18 | 1.000000 |
| rad53                         | 1.06346e-18 | 1.000000 | 1.06346e-18 | 1.000000 |
| rad31                         | 4.05050e-19 | 1.000000 | 4.05050e-19 | 1.000000 |
| rad64                         | 2.84448e-19 | 1.000000 | 2.84448e-19 | 1.000000 |
| rad24                         | 1.49659e-19 | 1.000000 | 1.49659e-19 | 1.000000 |
| rad61                         | 1.24169e-19 | 1.000000 | 1.24169e-19 | 1.000000 |
| rad56                         | 4.70015e-21 | 1.000000 | 4.70015e-21 | 1.000000 |
| rad68syn                      | 6.52925e-22 | 1.000000 | 6.52925e-22 | 1.000000 |
| rad68anti                     | 4.95636e-22 | 1.000000 | 4.95636e-22 | 1.000000 |
| rad40syn                      | 7.23008e-24 | 1.000000 | 7.23008e-24 | 1.000000 |
| rad40anti                     | 5.94142e-24 | 1.000000 | 5.94142e-24 | 1.000000 |
| PAH8+H                        | 8.32973e-25 | 1.000000 | 8.32973e-25 | 1.000000 |
| rad47                         | 7.14574e-25 | 1.000000 | 7.14574e-25 | 1.000000 |
| rad73                         | 2.35660e-25 | 1.000000 | 2.35660e-25 | 1.000000 |
| rad71                         | 1.27813e-27 | 1.000000 | 1.27813e-27 | 1.000000 |
| rad19syn                      | 2.99704e-32 | 1.000000 | 2.99704e-32 | 1.000000 |
| rad8                          | 4.45593e-53 | 1.000000 | 4.45593e-53 | 1.000000 |

10.0000000 Pa, 230.000000 K

=====

| Rate constant             | True (fraction)        | Effective (fraction)   |
|---------------------------|------------------------|------------------------|
| Total                     | 2.20761e-14 (1.00 )    | 2.20761e-14 (1.00 )    |
| Formation of rad19        | 2.20710e-14 (1.000 )   | 2.20710e-14 (1.000 )   |
| H-abstraction to cyc2enyl | 5.13155e-18 (0.000232) | 5.13155e-18 (0.000232) |
| H-abstraction to cyclenyl | 3.75316e-21 (1.70e-07) | 3.75316e-21 (1.70e-07) |

| species                       | PYtrue      | Cumul    | PYeffective | Cumul    |
|-------------------------------|-------------|----------|-------------|----------|
| Indene+H                      | 0.999356    | 0.999356 | 0.999356    | 0.999356 |
| PhCHCCH2+H                    | 0.000380602 | 0.999737 | 0.000380602 | 0.999737 |
| Benzene+cycloprop-2-enylidene | 0.000232448 | 0.999970 | 0.000232448 | 0.999970 |
| rad6                          | 9.81848e-06 | 0.999979 | 9.81848e-06 | 0.999979 |
| PhCCH+CH3                     | 5.93295e-06 | 0.999985 | 5.93295e-06 | 0.999985 |
| PhCCCH3+H                     | 3.98077e-06 | 0.999989 | 3.98077e-06 | 0.999989 |
| C2H2+PhCH2                    | 3.71930e-06 | 0.999993 | 3.71930e-06 | 0.999993 |
| Ph+MeAc                       | 3.38265e-06 | 0.999996 | 3.38265e-06 | 0.999996 |
| rad9                          | 1.33607e-06 | 0.999998 | 1.33607e-06 | 0.999998 |
| rad67                         | 1.03167e-06 | 0.999999 | 1.03167e-06 | 0.999999 |
| rad35                         | 4.42059e-07 | 0.999999 | 4.42059e-07 | 0.999999 |
| Ph+Allene                     | 1.90377e-07 | 0.999999 | 1.90377e-07 | 0.999999 |
| Benzene+cycloprop-1-enylidene | 1.70010e-07 | 1.000000 | 1.70010e-07 | 1.000000 |
| PhCH2CCH+H                    | 2.93084e-08 | 1.000000 | 2.93084e-08 | 1.000000 |
| PAH7+H                        | 1.82958e-08 | 1.000000 | 1.82958e-08 | 1.000000 |
| rad28                         | 1.38687e-08 | 1.000000 | 1.38687e-08 | 1.000000 |
| rad37                         | 1.24089e-08 | 1.000000 | 1.24089e-08 | 1.000000 |
| rad2                          | 1.06376e-08 | 1.000000 | 1.06376e-08 | 1.000000 |
| rad30                         | 8.13762e-09 | 1.000000 | 8.13762e-09 | 1.000000 |
| rad39                         | 5.13507e-09 | 1.000000 | 5.13507e-09 | 1.000000 |
| rad7                          | 2.08627e-09 | 1.000000 | 2.08627e-09 | 1.000000 |
| rad26                         | 2.03774e-09 | 1.000000 | 2.03774e-09 | 1.000000 |
| rad15                         | 9.92207e-10 | 1.000000 | 9.92207e-10 | 1.000000 |
| rad10                         | 8.41802e-10 | 1.000000 | 8.41802e-10 | 1.000000 |
| rad1                          | 7.40559e-10 | 1.000000 | 7.40559e-10 | 1.000000 |
| rad11                         | 7.13486e-10 | 1.000000 | 7.13486e-10 | 1.000000 |
| rad23                         | 4.49256e-10 | 1.000000 | 4.49256e-10 | 1.000000 |
| PAH9+H                        | 4.32586e-10 | 1.000000 | 4.32586e-10 | 1.000000 |
| rad38                         | 2.25273e-10 | 1.000000 | 2.25273e-10 | 1.000000 |
| rad3                          | 1.24753e-10 | 1.000000 | 1.24753e-10 | 1.000000 |
| rad4                          | 6.46251e-11 | 1.000000 | 6.46251e-11 | 1.000000 |
| rad60syn                      | 4.90421e-11 | 1.000000 | 4.90421e-11 | 1.000000 |
| PAH10+CH3                     | 4.61972e-11 | 1.000000 | 4.61972e-11 | 1.000000 |
| PhcycC3H3_A+H                 | 4.08645e-11 | 1.000000 | 4.08645e-11 | 1.000000 |
| PAH3+H                        | 2.98350e-11 | 1.000000 | 2.98350e-11 | 1.000000 |
| rad60anti                     | 2.46651e-11 | 1.000000 | 2.46651e-11 | 1.000000 |
| rad45                         | 1.67224e-11 | 1.000000 | 1.67224e-11 | 1.000000 |
| rad46                         | 1.30053e-11 | 1.000000 | 1.30053e-11 | 1.000000 |
| rad13                         | 6.44699e-12 | 1.000000 | 6.44699e-12 | 1.000000 |
| rad59                         | 5.78319e-12 | 1.000000 | 5.78319e-12 | 1.000000 |
| rad43                         | 1.62536e-12 | 1.000000 | 1.62536e-12 | 1.000000 |
| rad22                         | 1.42250e-12 | 1.000000 | 1.42250e-12 | 1.000000 |
| rad36                         | 1.05003e-12 | 1.000000 | 1.05003e-12 | 1.000000 |
| rad54                         | 6.43480e-13 | 1.000000 | 6.43480e-13 | 1.000000 |
| Phenyl+cycC3H4                | 5.81829e-13 | 1.000000 | 0.000000    | 1.000000 |
| PhcycC3H3_B+H                 | 4.18587e-13 | 1.000000 | 4.18587e-13 | 1.000000 |
| rad62                         | 3.15694e-13 | 1.000000 | 3.15694e-13 | 1.000000 |
| rad50                         | 1.54719e-13 | 1.000000 | 1.54719e-13 | 1.000000 |
| rad70                         | 2.46132e-14 | 1.000000 | 2.46132e-14 | 1.000000 |
| PAH1+H                        | 1.59242e-14 | 1.000000 | 1.59242e-14 | 1.000000 |
| rad14                         | 1.27804e-14 | 1.000000 | 1.27804e-14 | 1.000000 |
| rad27                         | 9.16974e-15 | 1.000000 | 9.16974e-15 | 1.000000 |
| rad33                         | 8.90134e-15 | 1.000000 | 8.90134e-15 | 1.000000 |
| rad55                         | 8.58264e-15 | 1.000000 | 8.58264e-15 | 1.000000 |
| rad12                         | 7.35542e-15 | 1.000000 | 7.35542e-15 | 1.000000 |
| rad25                         | 4.97587e-15 | 1.000000 | 4.97587e-15 | 1.000000 |
| rad58                         | 1.65928e-15 | 1.000000 | 1.65928e-15 | 1.000000 |
| rad52                         | 1.56920e-15 | 1.000000 | 1.56920e-15 | 1.000000 |
| rad19anti                     | 1.24591e-15 | 1.000000 | 1.24591e-15 | 1.000000 |
| rad34                         | 6.80574e-16 | 1.000000 | 6.80574e-16 | 1.000000 |
| rad51                         | 6.79254e-16 | 1.000000 | 6.79254e-16 | 1.000000 |
| rad41                         | 3.55202e-16 | 1.000000 | 3.55202e-16 | 1.000000 |
| rad42                         | 1.90579e-16 | 1.000000 | 1.90579e-16 | 1.000000 |
| rad5                          | 6.38213e-17 | 1.000000 | 6.38213e-17 | 1.000000 |
| rad18                         | 3.76647e-17 | 1.000000 | 3.76647e-17 | 1.000000 |
| rad65                         | 1.73781e-17 | 1.000000 | 1.73781e-17 | 1.000000 |
| rad20                         | 7.83332e-18 | 1.000000 | 7.83332e-18 | 1.000000 |
| rad21                         | 4.97145e-18 | 1.000000 | 4.97145e-18 | 1.000000 |
| rad53                         | 1.95449e-18 | 1.000000 | 1.95449e-18 | 1.000000 |

|           |             |          |             |          |
|-----------|-------------|----------|-------------|----------|
| rad64     | 5.56092e-19 | 1.000000 | 5.56092e-19 | 1.000000 |
| rad31     | 4.23564e-19 | 1.000000 | 4.23564e-19 | 1.000000 |
| rad61     | 2.66247e-19 | 1.000000 | 2.66247e-19 | 1.000000 |
| rad24     | 1.42830e-19 | 1.000000 | 1.42830e-19 | 1.000000 |
| rad56     | 1.15355e-20 | 1.000000 | 1.15355e-20 | 1.000000 |
| rad68syn  | 1.62001e-21 | 1.000000 | 1.62001e-21 | 1.000000 |
| rad68anti | 1.22161e-21 | 1.000000 | 1.22161e-21 | 1.000000 |
| rad40syn  | 2.23463e-23 | 1.000000 | 2.23463e-23 | 1.000000 |
| rad40anti | 1.83328e-23 | 1.000000 | 1.83328e-23 | 1.000000 |
| PAH8+H    | 3.10449e-24 | 1.000000 | 3.10449e-24 | 1.000000 |
| rad47     | 7.98864e-25 | 1.000000 | 7.98864e-25 | 1.000000 |
| rad73     | 7.40068e-25 | 1.000000 | 7.40068e-25 | 1.000000 |
| rad71     | 5.18563e-27 | 1.000000 | 5.18563e-27 | 1.000000 |
| rad19syn  | 1.11383e-31 | 1.000000 | 1.11383e-31 | 1.000000 |
| rad8      | 7.19731e-53 | 1.000000 | 7.19731e-53 | 1.000000 |

10.0000000 Pa, 240.000000 K

| Rate constant             | True (fraction)        | Effective (fraction)   |
|---------------------------|------------------------|------------------------|
| Total                     | 2.45462e-14 (1.00)     | 2.45462e-14 (1.00)     |
| Formation of rad19        | 2.45383e-14 (1.000)    | 2.45383e-14 (1.000)    |
| H-abstraction to cyc2enyl | 7.92234e-18 (0.000323) | 7.92234e-18 (0.000323) |
| H-abstraction to cyclenyl | 7.97958e-21 (3.25e-07) | 7.97958e-21 (3.25e-07) |

| species                       | PYtrue      | Cumul    | PYeffective | Cumul    |
|-------------------------------|-------------|----------|-------------|----------|
| Indene+H                      | 0.999246    | 0.999246 | 0.999246    | 0.999246 |
| PhCHCCH2+H                    | 0.000399625 | 0.999646 | 0.000399625 | 0.999646 |
| Benzene+cycloprop-2-enylidene | 0.000322752 | 0.999968 | 0.000322752 | 0.999968 |
| rad6                          | 9.62413e-06 | 0.999978 | 9.62413e-06 | 0.999978 |
| PhCCH+CH3                     | 6.28872e-06 | 0.999984 | 6.28872e-06 | 0.999984 |
| PhCCCH3+H                     | 4.22531e-06 | 0.999989 | 4.22531e-06 | 0.999989 |
| C2H2+PhCH2                    | 4.07990e-06 | 0.999993 | 4.07990e-06 | 0.999993 |
| Ph+MeAc                       | 3.63992e-06 | 0.999996 | 3.63992e-06 | 0.999996 |
| rad67                         | 1.10341e-06 | 0.999997 | 1.10341e-06 | 0.999997 |
| rad9                          | 1.00462e-06 | 0.999998 | 1.00462e-06 | 0.999998 |
| rad35                         | 4.71518e-07 | 0.999999 | 4.71518e-07 | 0.999999 |
| Benzene+cycloprop-1-enylidene | 3.25084e-07 | 0.999999 | 3.25084e-07 | 0.999999 |
| Ph+Allene                     | 2.23448e-07 | 0.999999 | 2.23448e-07 | 0.999999 |
| PhCH2CCH+H                    | 3.48557e-08 | 0.999999 | 3.48557e-08 | 0.999999 |
| PAH7+H                        | 2.15366e-08 | 0.999999 | 2.15366e-08 | 0.999999 |
| rad37                         | 1.35966e-08 | 0.999999 | 1.35966e-08 | 0.999999 |
| rad28                         | 1.35733e-08 | 1.000000 | 1.35733e-08 | 1.000000 |
| rad2                          | 1.03204e-08 | 1.000000 | 1.03204e-08 | 1.000000 |
| rad30                         | 8.72679e-09 | 1.000000 | 8.72679e-09 | 1.000000 |
| rad39                         | 6.04443e-09 | 1.000000 | 6.04443e-09 | 1.000000 |
| rad7                          | 2.03225e-09 | 1.000000 | 2.03225e-09 | 1.000000 |
| rad26                         | 1.81818e-09 | 1.000000 | 1.81818e-09 | 1.000000 |
| rad10                         | 8.15156e-10 | 1.000000 | 8.15156e-10 | 1.000000 |
| rad15                         | 7.43049e-10 | 1.000000 | 7.43049e-10 | 1.000000 |
| rad1                          | 7.26091e-10 | 1.000000 | 7.26091e-10 | 1.000000 |
| rad11                         | 6.93535e-10 | 1.000000 | 6.93535e-10 | 1.000000 |
| PAH9+H                        | 4.90208e-10 | 1.000000 | 4.90208e-10 | 1.000000 |
| rad23                         | 4.26670e-10 | 1.000000 | 4.26670e-10 | 1.000000 |
| rad38                         | 2.57108e-10 | 1.000000 | 2.57108e-10 | 1.000000 |
| rad3                          | 1.20928e-10 | 1.000000 | 1.20928e-10 | 1.000000 |
| rad4                          | 6.28281e-11 | 1.000000 | 6.28281e-11 | 1.000000 |
| PAH10+CH3                     | 5.59022e-11 | 1.000000 | 5.59022e-11 | 1.000000 |
| PhcycC3H3_A+H                 | 5.45432e-11 | 1.000000 | 5.45432e-11 | 1.000000 |
| rad60syn                      | 5.41599e-11 | 1.000000 | 5.41599e-11 | 1.000000 |
| PAH3+H                        | 3.42077e-11 | 1.000000 | 3.42077e-11 | 1.000000 |
| rad60anti                     | 2.73104e-11 | 1.000000 | 2.73104e-11 | 1.000000 |
| rad45                         | 1.57884e-11 | 1.000000 | 1.57884e-11 | 1.000000 |
| rad46                         | 1.50315e-11 | 1.000000 | 1.50315e-11 | 1.000000 |
| rad59                         | 6.58903e-12 | 1.000000 | 6.58903e-12 | 1.000000 |
| rad13                         | 6.28992e-12 | 1.000000 | 6.28992e-12 | 1.000000 |
| rad43                         | 1.91179e-12 | 1.000000 | 1.91179e-12 | 1.000000 |
| rad22                         | 1.33110e-12 | 1.000000 | 1.33110e-12 | 1.000000 |
| rad36                         | 9.96060e-13 | 1.000000 | 9.96060e-13 | 1.000000 |
| Phenyl+cycC3H4                | 8.50545e-13 | 1.000000 | 0.00000     | 1.000000 |
| rad54                         | 8.46760e-13 | 1.000000 | 8.46760e-13 | 1.000000 |
| PhcycC3H3_B+H                 | 6.79935e-13 | 1.000000 | 6.79935e-13 | 1.000000 |
| rad62                         | 3.73602e-13 | 1.000000 | 3.73602e-13 | 1.000000 |
| rad50                         | 1.89715e-13 | 1.000000 | 1.89715e-13 | 1.000000 |
| rad70                         | 3.32279e-14 | 1.000000 | 3.32279e-14 | 1.000000 |
| PAH1+H                        | 2.21887e-14 | 1.000000 | 2.21887e-14 | 1.000000 |
| rad14                         | 1.23512e-14 | 1.000000 | 1.23512e-14 | 1.000000 |
| rad55                         | 1.19047e-14 | 1.000000 | 1.19047e-14 | 1.000000 |
| rad27                         | 8.86797e-15 | 1.000000 | 8.86797e-15 | 1.000000 |

|           |             |          |             |          |
|-----------|-------------|----------|-------------|----------|
| rad33     | 8.75023e-15 | 1.000000 | 8.75023e-15 | 1.000000 |
| rad12     | 5.60589e-15 | 1.000000 | 5.60589e-15 | 1.000000 |
| rad25     | 4.84503e-15 | 1.000000 | 4.84503e-15 | 1.000000 |
| rad58     | 2.14574e-15 | 1.000000 | 2.14574e-15 | 1.000000 |
| rad52     | 2.00739e-15 | 1.000000 | 2.00739e-15 | 1.000000 |
| rad34     | 9.80607e-16 | 1.000000 | 9.80607e-16 | 1.000000 |
| rad19anti | 9.53139e-16 | 1.000000 | 9.53139e-16 | 1.000000 |
| rad51     | 9.10957e-16 | 1.000000 | 9.10957e-16 | 1.000000 |
| rad41     | 4.91515e-16 | 1.000000 | 4.91515e-16 | 1.000000 |
| rad42     | 2.58575e-16 | 1.000000 | 2.58575e-16 | 1.000000 |
| rad5      | 5.83552e-17 | 1.000000 | 5.83552e-17 | 1.000000 |
| rad18     | 3.46776e-17 | 1.000000 | 3.46776e-17 | 1.000000 |
| rad65     | 2.36797e-17 | 1.000000 | 2.36797e-17 | 1.000000 |
| rad20     | 7.53225e-18 | 1.000000 | 7.53225e-18 | 1.000000 |
| rad21     | 4.78670e-18 | 1.000000 | 4.78670e-18 | 1.000000 |
| rad53     | 3.52511e-18 | 1.000000 | 3.52511e-18 | 1.000000 |
| rad64     | 1.05860e-18 | 1.000000 | 1.05860e-18 | 1.000000 |
| rad61     | 5.49575e-19 | 1.000000 | 5.49575e-19 | 1.000000 |
| rad31     | 4.45785e-19 | 1.000000 | 4.45785e-19 | 1.000000 |
| rad24     | 1.36255e-19 | 1.000000 | 1.36255e-19 | 1.000000 |
| rad56     | 2.69463e-20 | 1.000000 | 2.69463e-20 | 1.000000 |
| rad68syn  | 3.81684e-21 | 1.000000 | 3.81684e-21 | 1.000000 |
| rad68anti | 2.86016e-21 | 1.000000 | 2.86016e-21 | 1.000000 |
| rad40syn  | 6.38330e-23 | 1.000000 | 6.38330e-23 | 1.000000 |
| rad40anti | 5.22494e-23 | 1.000000 | 5.22494e-23 | 1.000000 |
| PAH8+H    | 1.04510e-23 | 1.000000 | 1.04510e-23 | 1.000000 |
| rad73     | 2.15762e-24 | 1.000000 | 2.15762e-24 | 1.000000 |
| rad47     | 9.04778e-25 | 1.000000 | 9.04778e-25 | 1.000000 |
| rad71     | 1.88078e-26 | 1.000000 | 1.88078e-26 | 1.000000 |
| rad19syn  | 4.33477e-31 | 1.000000 | 4.33477e-31 | 1.000000 |
| rad8      | 1.18324e-52 | 1.000000 | 1.18324e-52 | 1.000000 |

10.0000000 Pa, 250.000000 K

| Rate constant             | True (fraction)        | Effective (fraction)   |
|---------------------------|------------------------|------------------------|
| Total                     | 2.71048e-14 (1.00 )    | 2.71048e-14 (1.00 )    |
| Formation of rad19        | 2.70930e-14 (1.000 )   | 2.70930e-14 (1.000 )   |
| H-abstraction to cyc2enyl | 1.17991e-17 (0.000435) | 1.17991e-17 (0.000435) |
| H-abstraction to cyclenyl | 1.59554e-20 (5.89e-07) | 1.59554e-20 (5.89e-07) |

| species                       | PYtrue      | Cumul    | PYeffective | Cumul    |
|-------------------------------|-------------|----------|-------------|----------|
| Indene+H                      | 0.999112    | 0.999112 | 0.999112    | 0.999112 |
| Benzene+cycloprop-2-enylidene | 0.000435312 | 0.999548 | 0.000435312 | 0.999548 |
| PhCHCCH2+H                    | 0.000420341 | 0.999968 | 0.000420341 | 0.999968 |
| rad6                          | 9.39755e-06 | 0.999977 | 9.39755e-06 | 0.999977 |
| PhCCH+CH3                     | 6.67723e-06 | 0.999984 | 6.67723e-06 | 0.999984 |
| PhCCCH3+H                     | 4.49322e-06 | 0.999989 | 4.49322e-06 | 0.999989 |
| C2H2+PhCH2                    | 4.48387e-06 | 0.999993 | 4.48387e-06 | 0.999993 |
| Ph+MeAc                       | 3.92567e-06 | 0.999997 | 3.92567e-06 | 0.999997 |
| rad67                         | 1.18294e-06 | 0.999998 | 1.18294e-06 | 0.999998 |
| rad9                          | 7.64831e-07 | 0.999999 | 7.64831e-07 | 0.999999 |
| Benzene+cycloprop-1-enylidene | 5.88656e-07 | 0.999999 | 5.88656e-07 | 0.999999 |
| rad35                         | 5.04092e-07 | 1.000000 | 5.04092e-07 | 1.000000 |
| Ph+Allene                     | 2.62696e-07 | 1.000000 | 2.62696e-07 | 1.000000 |
| PhCH2CCH+H                    | 4.15585e-08 | 1.000000 | 4.15585e-08 | 1.000000 |
| PAH7+H                        | 2.53249e-08 | 1.000000 | 2.53249e-08 | 1.000000 |
| rad37                         | 1.49402e-08 | 1.000000 | 1.49402e-08 | 1.000000 |
| rad28                         | 1.32310e-08 | 1.000000 | 1.32310e-08 | 1.000000 |
| rad2                          | 9.99744e-09 | 1.000000 | 9.99744e-09 | 1.000000 |
| rad30                         | 9.38307e-09 | 1.000000 | 9.38307e-09 | 1.000000 |
| rad39                         | 7.10638e-09 | 1.000000 | 7.10638e-09 | 1.000000 |
| rad7                          | 1.97273e-09 | 1.000000 | 1.97273e-09 | 1.000000 |
| rad26                         | 1.64093e-09 | 1.000000 | 1.64093e-09 | 1.000000 |
| rad10                         | 7.88327e-10 | 1.000000 | 7.88327e-10 | 1.000000 |
| rad1                          | 7.11433e-10 | 1.000000 | 7.11433e-10 | 1.000000 |
| rad11                         | 6.71875e-10 | 1.000000 | 6.71875e-10 | 1.000000 |
| rad15                         | 5.63541e-10 | 1.000000 | 5.63541e-10 | 1.000000 |
| PAH9+H                        | 5.57306e-10 | 1.000000 | 5.57306e-10 | 1.000000 |
| rad23                         | 4.04390e-10 | 1.000000 | 4.04390e-10 | 1.000000 |
| rad38                         | 2.94490e-10 | 1.000000 | 2.94490e-10 | 1.000000 |
| rad3                          | 1.17017e-10 | 1.000000 | 1.17017e-10 | 1.000000 |
| PhcycC3H3_A+H                 | 7.28881e-11 | 1.000000 | 7.28881e-11 | 1.000000 |
| PAH10+CH3                     | 6.79566e-11 | 1.000000 | 6.79566e-11 | 1.000000 |
| rad4                          | 6.09903e-11 | 1.000000 | 6.09903e-11 | 1.000000 |
| rad60syn                      | 6.00372e-11 | 1.000000 | 6.00372e-11 | 1.000000 |
| PAH3+H                        | 3.94201e-11 | 1.000000 | 3.94201e-11 | 1.000000 |
| rad60anti                     | 3.03562e-11 | 1.000000 | 3.03562e-11 | 1.000000 |
| rad46                         | 1.74435e-11 | 1.000000 | 1.74435e-11 | 1.000000 |

|                |             |         |             |         |
|----------------|-------------|---------|-------------|---------|
| rad45          | 1.48861e-11 | 1.00000 | 1.48861e-11 | 1.00000 |
| rad59          | 7.54314e-12 | 1.00000 | 7.54314e-12 | 1.00000 |
| rad13          | 6.11611e-12 | 1.00000 | 6.11611e-12 | 1.00000 |
| rad43          | 2.25805e-12 | 1.00000 | 2.25805e-12 | 1.00000 |
| rad22          | 1.24361e-12 | 1.00000 | 1.24361e-12 | 1.00000 |
| Phenyl+cycC3H4 | 1.23952e-12 | 1.00000 | 0.00000     | 1.00000 |
| rad54          | 1.11514e-12 | 1.00000 | 1.11514e-12 | 1.00000 |
| PhcycC3H3_B+H  | 1.08926e-12 | 1.00000 | 1.08926e-12 | 1.00000 |
| rad36          | 9.44086e-13 | 1.00000 | 9.44086e-13 | 1.00000 |
| rad62          | 4.43954e-13 | 1.00000 | 4.43954e-13 | 1.00000 |
| rad50          | 2.34003e-13 | 1.00000 | 2.34003e-13 | 1.00000 |
| rad70          | 4.49759e-14 | 1.00000 | 4.49759e-14 | 1.00000 |
| PAH1+H         | 3.09844e-14 | 1.00000 | 3.09844e-14 | 1.00000 |
| rad55          | 1.65035e-14 | 1.00000 | 1.65035e-14 | 1.00000 |
| rad14          | 1.19180e-14 | 1.00000 | 1.19180e-14 | 1.00000 |
| rad33          | 8.57340e-15 | 1.00000 | 8.57340e-15 | 1.00000 |
| rad27          | 8.56741e-15 | 1.00000 | 8.56741e-15 | 1.00000 |
| rad25          | 4.70281e-15 | 1.00000 | 4.70281e-15 | 1.00000 |
| rad12          | 4.32970e-15 | 1.00000 | 4.32970e-15 | 1.00000 |
| rad58          | 2.79047e-15 | 1.00000 | 2.79047e-15 | 1.00000 |
| rad52          | 2.58461e-15 | 1.00000 | 2.58461e-15 | 1.00000 |
| rad34          | 1.41334e-15 | 1.00000 | 1.41334e-15 | 1.00000 |
| rad51          | 1.22954e-15 | 1.00000 | 1.22954e-15 | 1.00000 |
| rad19anti      | 7.40347e-16 | 1.00000 | 7.40347e-16 | 1.00000 |
| rad41          | 6.80258e-16 | 1.00000 | 6.80258e-16 | 1.00000 |
| rad42          | 3.51129e-16 | 1.00000 | 3.51129e-16 | 1.00000 |
| rad5           | 5.34798e-17 | 1.00000 | 5.34798e-17 | 1.00000 |
| rad65          | 3.24529e-17 | 1.00000 | 3.24529e-17 | 1.00000 |
| rad18          | 3.19795e-17 | 1.00000 | 3.19795e-17 | 1.00000 |
| rad20          | 7.25674e-18 | 1.00000 | 7.25674e-18 | 1.00000 |
| rad53          | 6.24231e-18 | 1.00000 | 6.24231e-18 | 1.00000 |
| rad21          | 4.61800e-18 | 1.00000 | 4.61800e-18 | 1.00000 |
| rad64          | 1.96518e-18 | 1.00000 | 1.96518e-18 | 1.00000 |
| rad61          | 1.09628e-18 | 1.00000 | 1.09628e-18 | 1.00000 |
| rad31          | 4.72029e-19 | 1.00000 | 4.72029e-19 | 1.00000 |
| rad24          | 1.29880e-19 | 1.00000 | 1.29880e-19 | 1.00000 |
| rad56          | 6.01647e-20 | 1.00000 | 6.01647e-20 | 1.00000 |
| rad68syn       | 8.58058e-21 | 1.00000 | 8.58058e-21 | 1.00000 |
| rad68anti      | 6.39247e-21 | 1.00000 | 6.39247e-21 | 1.00000 |
| rad40syn       | 1.69826e-22 | 1.00000 | 1.69826e-22 | 1.00000 |
| rad40anti      | 1.38640e-22 | 1.00000 | 1.38640e-22 | 1.00000 |
| PAH8+H         | 3.20806e-23 | 1.00000 | 3.20806e-23 | 1.00000 |
| rad73          | 5.87357e-24 | 1.00000 | 5.87357e-24 | 1.00000 |
| rad47          | 1.03902e-24 | 1.00000 | 1.03902e-24 | 1.00000 |
| rad71          | 6.16070e-26 | 1.00000 | 6.16070e-26 | 1.00000 |
| rad19syn       | 1.76222e-30 | 1.00000 | 1.76222e-30 | 1.00000 |
| rad8           | 1.97833e-52 | 1.00000 | 1.97833e-52 | 1.00000 |

10.000000 Pa, 260.000000 K

=====

| Rate constant             | True (fraction)        | Effective (fraction)   |
|---------------------------|------------------------|------------------------|
| Total                     | 2.97464e-14 (1.00 )    | 2.97464e-14 (1.00 )    |
| Formation of rad19        | 2.97293e-14 (0.999 )   | 2.97293e-14 (0.999 )   |
| H-abstraction to cyc2enyl | 1.70236e-17 (0.000572) | 1.70236e-17 (0.000572) |
| H-abstraction to cyclenyl | 3.02186e-20 (1.02e-06) | 3.02186e-20 (1.02e-06) |

| species                       | PYtrue      | Cumul    | PYeffective | Cumul    |
|-------------------------------|-------------|----------|-------------|----------|
| Indene+H                      | 0.998951    | 0.998951 | 0.998951    | 0.998951 |
| Benzene+cycloprop-2-enylidene | 0.000572291 | 0.999523 | 0.000572291 | 0.999523 |
| PhCHCCH2+H                    | 0.000442907 | 0.999966 | 0.000442907 | 0.999966 |
| rad6                          | 9.13868e-06 | 0.999975 | 9.13868e-06 | 0.999975 |
| PhCCH+CH3                     | 7.10116e-06 | 0.999982 | 7.10116e-06 | 0.999982 |
| C2H2+PhCH2                    | 4.93575e-06 | 0.999987 | 4.93575e-06 | 0.999987 |
| PhCCCH3+H                     | 4.78674e-06 | 0.999992 | 4.78674e-06 | 0.999992 |
| Ph+MeAc                       | 4.24313e-06 | 0.999996 | 4.24313e-06 | 0.999996 |
| rad67                         | 1.27115e-06 | 0.999998 | 1.27115e-06 | 0.999998 |
| Benzene+cycloprop-1-enylidene | 1.01588e-06 | 0.999999 | 1.01588e-06 | 0.999999 |
| rad9                          | 5.89368e-07 | 0.999999 | 5.89368e-07 | 0.999999 |
| rad35                         | 5.40129e-07 | 1.000000 | 5.40129e-07 | 1.000000 |
| Ph+Allene                     | 3.09199e-07 | 1.000000 | 3.09199e-07 | 1.000000 |
| PhCH2CCH+H                    | 4.96467e-08 | 1.000000 | 4.96467e-08 | 1.000000 |
| PAH7+H                        | 2.97408e-08 | 1.000000 | 2.97408e-08 | 1.000000 |
| rad37                         | 1.64620e-08 | 1.000000 | 1.64620e-08 | 1.000000 |
| rad28                         | 1.28430e-08 | 1.000000 | 1.28430e-08 | 1.000000 |
| rad30                         | 1.01145e-08 | 1.000000 | 1.01145e-08 | 1.000000 |
| rad2                          | 9.66177e-09 | 1.000000 | 9.66177e-09 | 1.000000 |
| rad39                         | 8.34293e-09 | 1.000000 | 8.34293e-09 | 1.000000 |
| rad7                          | 1.90769e-09 | 1.000000 | 1.90769e-09 | 1.000000 |

|                |             |         |             |         |
|----------------|-------------|---------|-------------|---------|
| rad26          | 1.49491e-09 | 1.00000 | 1.49491e-09 | 1.00000 |
| rad10          | 7.60728e-10 | 1.00000 | 7.60728e-10 | 1.00000 |
| rad1           | 6.96038e-10 | 1.00000 | 6.96038e-10 | 1.00000 |
| rad11          | 6.48500e-10 | 1.00000 | 6.48500e-10 | 1.00000 |
| PAH9+H         | 6.35416e-10 | 1.00000 | 6.35416e-10 | 1.00000 |
| rad15          | 4.32691e-10 | 1.00000 | 4.32691e-10 | 1.00000 |
| rad23          | 3.82356e-10 | 1.00000 | 3.82356e-10 | 1.00000 |
| rad38          | 3.38403e-10 | 1.00000 | 3.38403e-10 | 1.00000 |
| rad3           | 1.12955e-10 | 1.00000 | 1.12955e-10 | 1.00000 |
| PhcycC3H3_A+H  | 9.74470e-11 | 1.00000 | 9.74470e-11 | 1.00000 |
| PAH10+CH3      | 8.29535e-11 | 1.00000 | 8.29535e-11 | 1.00000 |
| rad60syn       | 6.67950e-11 | 1.00000 | 6.67950e-11 | 1.00000 |
| rad4           | 5.90767e-11 | 1.00000 | 5.90767e-11 | 1.00000 |
| PAH3+H         | 4.56451e-11 | 1.00000 | 4.56451e-11 | 1.00000 |
| rad60anti      | 3.38676e-11 | 1.00000 | 3.38676e-11 | 1.00000 |
| rad46          | 2.03150e-11 | 1.00000 | 2.03150e-11 | 1.00000 |
| rad45          | 1.40114e-11 | 1.00000 | 1.40114e-11 | 1.00000 |
| rad59          | 8.67483e-12 | 1.00000 | 8.67483e-12 | 1.00000 |
| rad13          | 5.92540e-12 | 1.00000 | 5.92540e-12 | 1.00000 |
| rad43          | 2.67708e-12 | 1.00000 | 2.67708e-12 | 1.00000 |
| Phenyl+cycC3H4 | 1.79997e-12 | 1.00000 | 0.00000     | 1.00000 |
| PhcycC3H3_B+H  | 1.72243e-12 | 1.00000 | 1.72243e-12 | 1.00000 |
| rad54          | 1.46840e-12 | 1.00000 | 1.46840e-12 | 1.00000 |
| rad22          | 1.15954e-12 | 1.00000 | 1.15954e-12 | 1.00000 |
| rad36          | 8.93810e-13 | 1.00000 | 8.93810e-13 | 1.00000 |
| rad62          | 5.29480e-13 | 1.00000 | 5.29480e-13 | 1.00000 |
| rad50          | 2.90112e-13 | 1.00000 | 2.90112e-13 | 1.00000 |
| rad70          | 6.09570e-14 | 1.00000 | 6.09570e-14 | 1.00000 |
| PAH1+H         | 4.33072e-14 | 1.00000 | 4.33072e-14 | 1.00000 |
| rad55          | 2.28415e-14 | 1.00000 | 2.28415e-14 | 1.00000 |
| rad14          | 1.14740e-14 | 1.00000 | 1.14740e-14 | 1.00000 |
| rad33          | 8.37015e-15 | 1.00000 | 8.37015e-15 | 1.00000 |
| rad27          | 8.26139e-15 | 1.00000 | 8.26139e-15 | 1.00000 |
| rad25          | 4.54900e-15 | 1.00000 | 4.54900e-15 | 1.00000 |
| rad58          | 3.64622e-15 | 1.00000 | 3.64622e-15 | 1.00000 |
| rad12          | 3.38789e-15 | 1.00000 | 3.38789e-15 | 1.00000 |
| rad52          | 3.34585e-15 | 1.00000 | 3.34585e-15 | 1.00000 |
| rad34          | 2.03467e-15 | 1.00000 | 2.03467e-15 | 1.00000 |
| rad51          | 1.66790e-15 | 1.00000 | 1.66790e-15 | 1.00000 |
| rad41          | 9.40958e-16 | 1.00000 | 9.40958e-16 | 1.00000 |
| rad19anti      | 5.83791e-16 | 1.00000 | 5.83791e-16 | 1.00000 |
| rad42          | 4.76823e-16 | 1.00000 | 4.76823e-16 | 1.00000 |
| rad5           | 4.90622e-17 | 1.00000 | 4.90622e-17 | 1.00000 |
| rad65          | 4.46680e-17 | 1.00000 | 4.46680e-17 | 1.00000 |
| rad18          | 2.95223e-17 | 1.00000 | 2.95223e-17 | 1.00000 |
| rad53          | 1.08562e-17 | 1.00000 | 1.08562e-17 | 1.00000 |
| rad20          | 7.00132e-18 | 1.00000 | 7.00132e-18 | 1.00000 |
| rad21          | 4.46195e-18 | 1.00000 | 4.46195e-18 | 1.00000 |
| rad64          | 3.56169e-18 | 1.00000 | 3.56169e-18 | 1.00000 |
| rad61          | 2.11936e-18 | 1.00000 | 2.11936e-18 | 1.00000 |
| rad31          | 5.02797e-19 | 1.00000 | 5.02797e-19 | 1.00000 |
| rad56          | 1.28804e-19 | 1.00000 | 1.28804e-19 | 1.00000 |
| rad24          | 1.23669e-19 | 1.00000 | 1.23669e-19 | 1.00000 |
| rad68syn       | 1.84719e-20 | 1.00000 | 1.84719e-20 | 1.00000 |
| rad68anti      | 1.36881e-20 | 1.00000 | 1.36881e-20 | 1.00000 |
| rad40syn       | 4.23356e-22 | 1.00000 | 4.23356e-22 | 1.00000 |
| rad40anti      | 3.44636e-22 | 1.00000 | 3.44636e-22 | 1.00000 |
| PAH8+H         | 9.05118e-23 | 1.00000 | 9.05118e-23 | 1.00000 |
| rad73          | 1.49970e-23 | 1.00000 | 1.49970e-23 | 1.00000 |
| rad47          | 1.21096e-24 | 1.00000 | 1.21096e-24 | 1.00000 |
| rad71          | 1.83887e-25 | 1.00000 | 1.83887e-25 | 1.00000 |
| rad19syn       | 7.46115e-30 | 1.00000 | 7.46115e-30 | 1.00000 |
| rad8           | 3.36212e-52 | 1.00000 | 3.36212e-52 | 1.00000 |

10.000000 Pa, 270.000000 K

=====

| Rate constant             | True (fraction)        | Effective (fraction)   |
|---------------------------|------------------------|------------------------|
| Total                     | 3.24655e-14 (1.00 )    | 3.24655e-14 (1.00 )    |
| Formation of rad19        | 3.24415e-14 (0.999 )   | 3.24415e-14 (0.999 )   |
| H-abstraction to cyc2enyl | 2.38790e-17 (0.000736) | 2.38790e-17 (0.000736) |
| H-abstraction to cyclenyl | 5.45397e-20 (1.68e-06) | 5.45397e-20 (1.68e-06) |

| species                       | PYtrue      | Cumul    | PYeffective | Cumul    |
|-------------------------------|-------------|----------|-------------|----------|
| Indene+H                      | 0.998761    | 0.998761 | 0.998761    | 0.998761 |
| Benzene+cycloprop-2-enylidene | 0.000735519 | 0.999497 | 0.000735519 | 0.999497 |
| PhCHCCH2+H                    | 0.000467489 | 0.999964 | 0.000467489 | 0.999964 |
| rad6                          | 8.84826e-06 | 0.999973 | 8.84826e-06 | 0.999973 |
| PhCCH+CH3                     | 7.56321e-06 | 0.999981 | 7.56321e-06 | 0.999981 |



|                               |             |          |             |          |
|-------------------------------|-------------|----------|-------------|----------|
| C2H2+PhCH2                    | 5.44028e-06 | 0.999986 | 5.44028e-06 | 0.999986 |
| PhCCCH3+H                     | 5.10827e-06 | 0.999991 | 5.10827e-06 | 0.999991 |
| Ph+MeAc                       | 4.59583e-06 | 0.999996 | 4.59583e-06 | 0.999996 |
| Benzene+cycloprop-1-enylidene | 1.67993e-06 | 0.999997 | 1.67993e-06 | 0.999997 |
| rad67                         | 1.36900e-06 | 0.999999 | 1.36900e-06 | 0.999999 |
| rad35                         | 5.80004e-07 | 0.999999 | 5.80004e-07 | 0.999999 |
| rad9                          | 4.59575e-07 | 1.000000 | 4.59575e-07 | 1.000000 |
| Ph+Allene                     | 3.64174e-07 | 1.000000 | 3.64174e-07 | 1.000000 |
| PhCH2CCH+H                    | 5.93890e-08 | 1.000000 | 5.93890e-08 | 1.000000 |
| PAH7+H                        | 3.48730e-08 | 1.000000 | 3.48730e-08 | 1.000000 |
| rad37                         | 1.81870e-08 | 1.000000 | 1.81870e-08 | 1.000000 |
| rad28                         | 1.24109e-08 | 1.000000 | 1.24109e-08 | 1.000000 |
| rad30                         | 1.09298e-08 | 1.000000 | 1.09298e-08 | 1.000000 |
| rad39                         | 9.77811e-09 | 1.000000 | 9.77811e-09 | 1.000000 |
| rad2                          | 9.30872e-09 | 1.000000 | 9.30872e-09 | 1.000000 |
| rad7                          | 1.83727e-09 | 1.000000 | 1.83727e-09 | 1.000000 |
| rad26                         | 1.37190e-09 | 1.000000 | 1.37190e-09 | 1.000000 |
| rad10                         | 7.31982e-10 | 1.000000 | 7.31982e-10 | 1.000000 |
| PAH9+H                        | 7.26282e-10 | 1.000000 | 7.26282e-10 | 1.000000 |
| rad1                          | 6.79523e-10 | 1.000000 | 6.79523e-10 | 1.000000 |
| rad11                         | 6.23460e-10 | 1.000000 | 6.23460e-10 | 1.000000 |
| rad38                         | 3.89988e-10 | 1.000000 | 3.89988e-10 | 1.000000 |
| rad23                         | 3.60549e-10 | 1.000000 | 3.60549e-10 | 1.000000 |
| rad15                         | 3.36248e-10 | 1.000000 | 3.36248e-10 | 1.000000 |
| PhcycC3H3_A+H                 | 1.30246e-10 | 1.000000 | 1.30246e-10 | 1.000000 |
| rad3                          | 1.08704e-10 | 1.000000 | 1.08704e-10 | 1.000000 |
| PAH10+CH3                     | 1.01632e-10 | 1.000000 | 1.01632e-10 | 1.000000 |
| rad60syn                      | 7.45726e-11 | 1.000000 | 7.45726e-11 | 1.000000 |
| rad4                          | 5.70657e-11 | 1.000000 | 5.70657e-11 | 1.000000 |
| PAH3+H                        | 5.30913e-11 | 1.000000 | 5.30913e-11 | 1.000000 |
| rad60anti                     | 3.79199e-11 | 1.000000 | 3.79199e-11 | 1.000000 |
| rad46                         | 2.37326e-11 | 1.000000 | 2.37326e-11 | 1.000000 |
| rad45                         | 1.31616e-11 | 1.000000 | 1.31616e-11 | 1.000000 |
| rad59                         | 1.00190e-11 | 1.000000 | 1.00190e-11 | 1.000000 |
| rad13                         | 5.71811e-12 | 1.000000 | 5.71811e-12 | 1.000000 |
| rad43                         | 3.18452e-12 | 1.000000 | 3.18452e-12 | 1.000000 |
| PhcycC3H3_B+H                 | 2.68990e-12 | 1.000000 | 2.68990e-12 | 1.000000 |
| Phenyl+cycC3H4                | 2.60320e-12 | 1.000000 | 0.000000    | 1.000000 |
| rad54                         | 1.93164e-12 | 1.000000 | 1.93164e-12 | 1.000000 |
| rad22                         | 1.07860e-12 | 1.000000 | 1.07860e-12 | 1.000000 |
| rad36                         | 8.45031e-13 | 1.000000 | 8.45031e-13 | 1.000000 |
| rad62                         | 6.33462e-13 | 1.000000 | 6.33462e-13 | 1.000000 |
| rad50                         | 3.61223e-13 | 1.000000 | 3.61223e-13 | 1.000000 |
| rad70                         | 8.26225e-14 | 1.000000 | 8.26225e-14 | 1.000000 |
| PAH1+H                        | 6.05156e-14 | 1.000000 | 6.05156e-14 | 1.000000 |
| rad55                         | 3.15302e-14 | 1.000000 | 3.15302e-14 | 1.000000 |
| rad14                         | 1.10149e-14 | 1.000000 | 1.10149e-14 | 1.000000 |
| rad33                         | 8.14048e-15 | 1.000000 | 8.14048e-15 | 1.000000 |
| rad27                         | 7.94557e-15 | 1.000000 | 7.94557e-15 | 1.000000 |
| rad58                         | 4.78270e-15 | 1.000000 | 4.78270e-15 | 1.000000 |
| rad25                         | 4.38377e-15 | 1.000000 | 4.38377e-15 | 1.000000 |
| rad52                         | 4.34990e-15 | 1.000000 | 4.34990e-15 | 1.000000 |
| rad34                         | 2.92185e-15 | 1.000000 | 2.92185e-15 | 1.000000 |
| rad12                         | 2.68526e-15 | 1.000000 | 2.68526e-15 | 1.000000 |
| rad51                         | 2.27072e-15 | 1.000000 | 2.27072e-15 | 1.000000 |
| rad41                         | 1.29991e-15 | 1.000000 | 1.29991e-15 | 1.000000 |
| rad42                         | 6.47012e-16 | 1.000000 | 6.47012e-16 | 1.000000 |
| rad19anti                     | 4.67296e-16 | 1.000000 | 4.67296e-16 | 1.000000 |
| rad65                         | 6.16548e-17 | 1.000000 | 6.16548e-17 | 1.000000 |
| rad5                          | 4.50093e-17 | 1.000000 | 4.50093e-17 | 1.000000 |
| rad18                         | 2.72682e-17 | 1.000000 | 2.72682e-17 | 1.000000 |
| rad53                         | 1.85443e-17 | 1.000000 | 1.85443e-17 | 1.000000 |
| rad20                         | 6.76169e-18 | 1.000000 | 6.76169e-18 | 1.000000 |
| rad64                         | 6.30715e-18 | 1.000000 | 6.30715e-18 | 1.000000 |
| rad21                         | 4.31586e-18 | 1.000000 | 4.31586e-18 | 1.000000 |
| rad61                         | 3.97871e-18 | 1.000000 | 3.97871e-18 | 1.000000 |
| rad31                         | 5.38801e-19 | 1.000000 | 5.38801e-19 | 1.000000 |
| rad56                         | 2.65009e-19 | 1.000000 | 2.65009e-19 | 1.000000 |
| rad24                         | 1.17596e-19 | 1.000000 | 1.17596e-19 | 1.000000 |
| rad68syn                      | 3.81786e-20 | 1.000000 | 3.81786e-20 | 1.000000 |
| rad68anti                     | 2.81549e-20 | 1.000000 | 2.81549e-20 | 1.000000 |
| rad40syn                      | 9.93694e-22 | 1.000000 | 9.93694e-22 | 1.000000 |
| rad40anti                     | 8.06614e-22 | 1.000000 | 8.06614e-22 | 1.000000 |
| PAH8+H                        | 2.36341e-22 | 1.000000 | 2.36341e-22 | 1.000000 |
| rad73                         | 3.60484e-23 | 1.000000 | 3.60484e-23 | 1.000000 |
| rad47                         | 1.43384e-24 | 1.000000 | 1.43384e-24 | 1.000000 |
| rad71                         | 5.04119e-25 | 1.000000 | 5.04119e-25 | 1.000000 |
| rad19syn                      | 3.27852e-29 | 1.000000 | 3.27852e-29 | 1.000000 |
| rad8                          | 5.80602e-52 | 1.000000 | 5.80602e-52 | 1.000000 |

10.0000000 Pa, 280.000000 K

```

=====
Rate constant | True (fraction) | Effective (fraction)
-----
Total | 3.52572e-14 (1.00 ) | 3.52572e-14 (1.00 )
Formation of rad19 | 3.52244e-14 (0.999 ) | 3.52244e-14 (0.999 )
H-abstraction to cyc2enyl | 3.26639e-17 (0.000926) | 3.26639e-17 (0.000926)
H-abstraction to cyclenyl | 9.42926e-20 (2.67e-06) | 9.42926e-20 (2.67e-06)

```

| species                       | PYtrue      | Cumul    | PYeffective | Cumul    |
|-------------------------------|-------------|----------|-------------|----------|
| Indene+H                      | 0.998540    | 0.998540 | 0.998540    | 0.998540 |
| Benzene+cycloprop-2-enylidene | 0.000926445 | 0.999467 | 0.000926445 | 0.999467 |
| PhCHCCH2+H                    | 0.000494261 | 0.999961 | 0.000494261 | 0.999961 |
| rad6                          | 8.52789e-06 | 0.999970 | 8.52789e-06 | 0.999970 |
| PhCCH+CH3                     | 8.06612e-06 | 0.999978 | 8.06612e-06 | 0.999978 |
| C2H2+PhCH2                    | 6.00244e-06 | 0.999984 | 6.00244e-06 | 0.999984 |
| PhCCCH3+H                     | 5.46033e-06 | 0.999989 | 5.46033e-06 | 0.999989 |
| Ph+MeAc                       | 4.98761e-06 | 0.999994 | 4.98761e-06 | 0.999994 |
| Benzene+cycloprop-1-enylidene | 2.67442e-06 | 0.999997 | 2.67442e-06 | 0.999997 |
| rad67                         | 1.47755e-06 | 0.999998 | 1.47755e-06 | 0.999998 |
| rad35                         | 6.24130e-07 | 0.999999 | 6.24130e-07 | 0.999999 |
| Ph+Allene                     | 4.29007e-07 | 0.999999 | 4.29007e-07 | 0.999999 |
| rad9                          | 3.62584e-07 | 1.000000 | 3.62584e-07 | 1.000000 |
| PhCH2CCH+H                    | 7.10971e-08 | 1.000000 | 7.10971e-08 | 1.000000 |
| PAH7+H                        | 4.08174e-08 | 1.000000 | 4.08174e-08 | 1.000000 |
| rad37                         | 2.01435e-08 | 1.000000 | 2.01435e-08 | 1.000000 |
| rad28                         | 1.19380e-08 | 1.000000 | 1.19380e-08 | 1.000000 |
| rad30                         | 1.18388e-08 | 1.000000 | 1.18388e-08 | 1.000000 |
| rad39                         | 1.14380e-08 | 1.000000 | 1.14380e-08 | 1.000000 |
| rad2                          | 8.93611e-09 | 1.000000 | 8.93611e-09 | 1.000000 |
| rad7                          | 1.76184e-09 | 1.000000 | 1.76184e-09 | 1.000000 |
| rad26                         | 1.26577e-09 | 1.000000 | 1.26577e-09 | 1.000000 |
| PAH9+H                        | 8.31878e-10 | 1.000000 | 8.31878e-10 | 1.000000 |
| rad10                         | 7.01895e-10 | 1.000000 | 7.01895e-10 | 1.000000 |
| rad1                          | 6.61637e-10 | 1.000000 | 6.61637e-10 | 1.000000 |
| rad11                         | 5.96865e-10 | 1.000000 | 5.96865e-10 | 1.000000 |
| rad38                         | 4.50565e-10 | 1.000000 | 4.50565e-10 | 1.000000 |
| rad23                         | 3.38987e-10 | 1.000000 | 3.38987e-10 | 1.000000 |
| rad15                         | 2.64424e-10 | 1.000000 | 2.64424e-10 | 1.000000 |
| PhcycC3H3_A+H                 | 1.73914e-10 | 1.000000 | 1.73914e-10 | 1.000000 |
| PAH10+CH3                     | 1.24909e-10 | 1.000000 | 1.24909e-10 | 1.000000 |
| rad3                          | 1.04246e-10 | 1.000000 | 1.04246e-10 | 1.000000 |
| rad60syn                      | 8.35298e-11 | 1.000000 | 8.35298e-11 | 1.000000 |
| PAH3+H                        | 6.20082e-11 | 1.000000 | 6.20082e-11 | 1.000000 |
| rad4                          | 5.49462e-11 | 1.000000 | 5.49462e-11 | 1.000000 |
| rad60anti                     | 4.25997e-11 | 1.000000 | 4.25997e-11 | 1.000000 |
| rad46                         | 2.77970e-11 | 1.000000 | 2.77970e-11 | 1.000000 |
| rad45                         | 1.23359e-11 | 1.000000 | 1.23359e-11 | 1.000000 |
| rad59                         | 1.16172e-11 | 1.000000 | 1.16172e-11 | 1.000000 |
| rad13                         | 5.49511e-12 | 1.000000 | 5.49511e-12 | 1.000000 |
| PhcycC3H3_B+H                 | 4.14973e-12 | 1.000000 | 4.14973e-12 | 1.000000 |
| rad43                         | 3.79911e-12 | 1.000000 | 3.79911e-12 | 1.000000 |
| Phenyl+cycC3H4                | 3.74742e-12 | 1.000000 | 0.000000    | 1.000000 |
| rad54                         | 2.53649e-12 | 1.000000 | 2.53649e-12 | 1.000000 |
| rad22                         | 1.00060e-12 | 1.000000 | 1.00060e-12 | 1.000000 |
| rad36                         | 7.97637e-13 | 1.000000 | 7.97637e-13 | 1.000000 |
| rad62                         | 7.59821e-13 | 1.000000 | 7.59821e-13 | 1.000000 |
| rad50                         | 4.51311e-13 | 1.000000 | 4.51311e-13 | 1.000000 |
| rad70                         | 1.11867e-13 | 1.000000 | 1.11867e-13 | 1.000000 |
| PAH1+H                        | 8.44422e-14 | 1.000000 | 8.44422e-14 | 1.000000 |
| rad55                         | 4.33707e-14 | 1.000000 | 4.33707e-14 | 1.000000 |
| rad14                         | 1.05389e-14 | 1.000000 | 1.05389e-14 | 1.000000 |
| rad33                         | 7.88514e-15 | 1.000000 | 7.88514e-15 | 1.000000 |
| rad27                         | 7.61760e-15 | 1.000000 | 7.61760e-15 | 1.000000 |
| rad58                         | 6.29149e-15 | 1.000000 | 6.29149e-15 | 1.000000 |
| rad52                         | 5.67315e-15 | 1.000000 | 5.67315e-15 | 1.000000 |
| rad25                         | 4.20770e-15 | 1.000000 | 4.20770e-15 | 1.000000 |
| rad34                         | 4.18035e-15 | 1.000000 | 4.18035e-15 | 1.000000 |
| rad51                         | 3.09824e-15 | 1.000000 | 3.09824e-15 | 1.000000 |
| rad12                         | 2.15573e-15 | 1.000000 | 2.15573e-15 | 1.000000 |
| rad41                         | 1.79219e-15 | 1.000000 | 1.79219e-15 | 1.000000 |
| rad42                         | 8.76563e-16 | 1.000000 | 8.76563e-16 | 1.000000 |
| rad19anti                     | 3.79707e-16 | 1.000000 | 3.79707e-16 | 1.000000 |
| rad65                         | 8.52192e-17 | 1.000000 | 8.52192e-17 | 1.000000 |
| rad5                          | 4.12564e-17 | 1.000000 | 4.12564e-17 | 1.000000 |
| rad53                         | 3.11101e-17 | 1.000000 | 3.11101e-17 | 1.000000 |
| rad18                         | 2.51882e-17 | 1.000000 | 2.51882e-17 | 1.000000 |
| rad64                         | 1.09180e-17 | 1.000000 | 1.09180e-17 | 1.000000 |
| rad61                         | 7.26242e-18 | 1.000000 | 7.26242e-18 | 1.000000 |

|           |             |          |             |          |
|-----------|-------------|----------|-------------|----------|
| rad20     | 6.53445e-18 | 1.000000 | 6.53445e-18 | 1.000000 |
| rad21     | 4.17763e-18 | 1.000000 | 4.17763e-18 | 1.000000 |
| rad31     | 5.81013e-19 | 1.000000 | 5.81013e-19 | 1.000000 |
| rad56     | 5.24869e-19 | 1.000000 | 5.24869e-19 | 1.000000 |
| rad24     | 1.11651e-19 | 1.000000 | 1.11651e-19 | 1.000000 |
| rad68syn  | 7.59022e-20 | 1.000000 | 7.59022e-20 | 1.000000 |
| rad68anti | 5.57337e-20 | 1.000000 | 5.57337e-20 | 1.000000 |
| rad40syn  | 2.20486e-21 | 1.000000 | 2.20486e-21 | 1.000000 |
| rad40anti | 1.78479e-21 | 1.000000 | 1.78479e-21 | 1.000000 |
| PAH8+H    | 5.74625e-22 | 1.000000 | 5.74625e-22 | 1.000000 |
| rad73     | 8.18352e-23 | 1.000000 | 8.18352e-23 | 1.000000 |
| rad47     | 1.72661e-24 | 1.000000 | 1.72661e-24 | 1.000000 |
| rad71     | 1.27838e-24 | 1.000000 | 1.27838e-24 | 1.000000 |
| rad19syn  | 1.48911e-28 | 1.000000 | 1.48911e-28 | 1.000000 |
| rad8      | 1.01866e-51 | 1.000000 | 1.01866e-51 | 1.000000 |

10.0000000 Pa, 290.000000 K

| Rate constant             | True (fraction)        | Effective (fraction)   |
|---------------------------|------------------------|------------------------|
| Total                     | 3.81171e-14 (1.00 )    | 3.81171e-14 (1.00 )    |
| Formation of rad19        | 3.80733e-14 (0.999 )   | 3.80733e-14 (0.999 )   |
| H-abstraction to cyc2enyl | 4.36868e-17 (0.00115 ) | 4.36868e-17 (0.00115 ) |
| H-abstraction to cyclenyl | 1.56861e-19 (4.12e-06) | 1.56861e-19 (4.12e-06) |

| species                       | PYtrue      | Cumul    | PYeffective | Cumul    |
|-------------------------------|-------------|----------|-------------|----------|
| Indene+H                      | 0.998288    | 0.998288 | 0.998288    | 0.998288 |
| Benzene+cycloprop-2-enylidene | 0.00114612  | 0.999435 | 0.00114612  | 0.999435 |
| PhCHCCH2+H                    | 0.000523410 | 0.999958 | 0.000523410 | 0.999958 |
| PhCCH+CH3                     | 8.61265e-06 | 0.999967 | 8.61265e-06 | 0.999967 |
| rad6                          | 8.17999e-06 | 0.999975 | 8.17999e-06 | 0.999975 |
| C2H2+PhCH2                    | 6.62740e-06 | 0.999981 | 6.62740e-06 | 0.999981 |
| PhCCCH3+H                     | 5.84559e-06 | 0.999987 | 5.84559e-06 | 0.999987 |
| Ph+MeAc                       | 5.42261e-06 | 0.999993 | 5.42261e-06 | 0.999993 |
| Benzene+cycloprop-1-enylidene | 4.11523e-06 | 0.999997 | 4.11523e-06 | 0.999997 |
| rad67                         | 1.59796e-06 | 0.999998 | 1.59796e-06 | 0.999998 |
| rad35                         | 6.72948e-07 | 0.999999 | 6.72948e-07 | 0.999999 |
| Ph+Allene                     | 5.05247e-07 | 1.000000 | 5.05247e-07 | 1.000000 |
| rad9                          | 2.89408e-07 | 1.000000 | 2.89408e-07 | 1.000000 |
| PhCH2CCH+H                    | 8.51307e-08 | 1.000000 | 8.51307e-08 | 1.000000 |
| PAH7+H                        | 4.76788e-08 | 1.000000 | 4.76788e-08 | 1.000000 |
| rad37                         | 2.23629e-08 | 1.000000 | 2.23629e-08 | 1.000000 |
| rad39                         | 1.33508e-08 | 1.000000 | 1.33508e-08 | 1.000000 |
| rad30                         | 1.28520e-08 | 1.000000 | 1.28520e-08 | 1.000000 |
| rad28                         | 1.14280e-08 | 1.000000 | 1.14280e-08 | 1.000000 |
| rad2                          | 8.54352e-09 | 1.000000 | 8.54352e-09 | 1.000000 |
| rad7                          | 1.68187e-09 | 1.000000 | 1.68187e-09 | 1.000000 |
| rad26                         | 1.17205e-09 | 1.000000 | 1.17205e-09 | 1.000000 |
| PAH9+H                        | 9.54432e-10 | 1.000000 | 9.54432e-10 | 1.000000 |
| rad10                         | 6.70420e-10 | 1.000000 | 6.70420e-10 | 1.000000 |
| rad1                          | 6.42245e-10 | 1.000000 | 6.42245e-10 | 1.000000 |
| rad11                         | 5.68877e-10 | 1.000000 | 5.68877e-10 | 1.000000 |
| rad38                         | 5.21653e-10 | 1.000000 | 5.21653e-10 | 1.000000 |
| rad23                         | 3.17716e-10 | 1.000000 | 3.17716e-10 | 1.000000 |
| PhcycC3H3_A+H                 | 2.31829e-10 | 1.000000 | 2.31829e-10 | 1.000000 |
| rad15                         | 2.10409e-10 | 1.000000 | 2.10409e-10 | 1.000000 |
| PAH10+CH3                     | 1.53909e-10 | 1.000000 | 1.53909e-10 | 1.000000 |
| rad3                          | 9.95857e-11 | 1.000000 | 9.95857e-11 | 1.000000 |
| rad60syn                      | 9.38488e-11 | 1.000000 | 9.38488e-11 | 1.000000 |
| PAH3+H                        | 7.26932e-11 | 1.000000 | 7.26932e-11 | 1.000000 |
| rad4                          | 5.27169e-11 | 1.000000 | 5.27169e-11 | 1.000000 |
| rad60anti                     | 4.80059e-11 | 1.000000 | 4.80059e-11 | 1.000000 |
| rad46                         | 3.26254e-11 | 1.000000 | 3.26254e-11 | 1.000000 |
| rad59                         | 1.35183e-11 | 1.000000 | 1.35183e-11 | 1.000000 |
| rad45                         | 1.15346e-11 | 1.000000 | 1.15346e-11 | 1.000000 |
| PhcycC3H3_B+H                 | 6.32391e-12 | 1.000000 | 6.32391e-12 | 1.000000 |
| Phenyl+cycC3H4                | 5.36584e-12 | 1.000000 | 0.000000    | 1.000000 |
| rad13                         | 5.25777e-12 | 1.000000 | 5.25777e-12 | 1.000000 |
| rad43                         | 4.54322e-12 | 1.000000 | 4.54322e-12 | 1.000000 |
| rad54                         | 3.32228e-12 | 1.000000 | 3.32228e-12 | 1.000000 |
| rad22                         | 9.25489e-13 | 1.000000 | 9.25489e-13 | 1.000000 |
| rad62                         | 9.13212e-13 | 1.000000 | 9.13212e-13 | 1.000000 |
| rad36                         | 7.51591e-13 | 1.000000 | 7.51591e-13 | 1.000000 |
| rad50                         | 5.65312e-13 | 1.000000 | 5.65312e-13 | 1.000000 |
| rad70                         | 1.51137e-13 | 1.000000 | 1.51137e-13 | 1.000000 |
| PAH1+H                        | 1.17526e-13 | 1.000000 | 1.17526e-13 | 1.000000 |
| rad55                         | 5.93972e-14 | 1.000000 | 5.93972e-14 | 1.000000 |
| rad14                         | 1.00458e-14 | 1.000000 | 1.00458e-14 | 1.000000 |
| rad58                         | 8.29166e-15 | 1.000000 | 8.29166e-15 | 1.000000 |

|           |             |         |             |         |
|-----------|-------------|---------|-------------|---------|
| rad33     | 7.60555e-15 | 1.00000 | 7.60555e-15 | 1.00000 |
| rad52     | 7.41380e-15 | 1.00000 | 7.41380e-15 | 1.00000 |
| rad27     | 7.27669e-15 | 1.00000 | 7.27669e-15 | 1.00000 |
| rad34     | 5.95188e-15 | 1.00000 | 5.95188e-15 | 1.00000 |
| rad51     | 4.23062e-15 | 1.00000 | 4.23062e-15 | 1.00000 |
| rad25     | 4.02176e-15 | 1.00000 | 4.02176e-15 | 1.00000 |
| rad41     | 2.46402e-15 | 1.00000 | 2.46402e-15 | 1.00000 |
| rad12     | 1.75289e-15 | 1.00000 | 1.75289e-15 | 1.00000 |
| rad42     | 1.18472e-15 | 1.00000 | 1.18472e-15 | 1.00000 |
| rad19anti | 3.13309e-16 | 1.00000 | 3.13309e-16 | 1.00000 |
| rad65     | 1.17781e-16 | 1.00000 | 1.17781e-16 | 1.00000 |
| rad53     | 5.12408e-17 | 1.00000 | 5.12408e-17 | 1.00000 |
| rad5      | 3.77590e-17 | 1.00000 | 3.77590e-17 | 1.00000 |
| rad18     | 2.32598e-17 | 1.00000 | 2.32598e-17 | 1.00000 |
| rad64     | 1.84790e-17 | 1.00000 | 1.84790e-17 | 1.00000 |
| rad61     | 1.28984e-17 | 1.00000 | 1.28984e-17 | 1.00000 |
| rad20     | 6.31705e-18 | 1.00000 | 6.31705e-18 | 1.00000 |
| rad21     | 4.04568e-18 | 1.00000 | 4.04568e-18 | 1.00000 |
| rad56     | 1.00194e-18 | 1.00000 | 1.00194e-18 | 1.00000 |
| rad31     | 6.30721e-19 | 1.00000 | 6.30721e-19 | 1.00000 |
| rad68syn  | 1.45354e-19 | 1.00000 | 1.45354e-19 | 1.00000 |
| rad68anti | 1.06325e-19 | 1.00000 | 1.06325e-19 | 1.00000 |
| rad24     | 1.05833e-19 | 1.00000 | 1.05833e-19 | 1.00000 |
| rad40syn  | 4.64069e-21 | 1.00000 | 4.64069e-21 | 1.00000 |
| rad40anti | 3.74669e-21 | 1.00000 | 3.74669e-21 | 1.00000 |
| PAH8+H    | 1.30801e-21 | 1.00000 | 1.30801e-21 | 1.00000 |
| rad73     | 1.75975e-22 | 1.00000 | 1.75975e-22 | 1.00000 |
| rad71     | 3.01788e-24 | 1.00000 | 3.01788e-24 | 1.00000 |
| rad47     | 2.11677e-24 | 1.00000 | 2.11677e-24 | 1.00000 |
| rad19syn  | 6.95965e-28 | 1.00000 | 6.95965e-28 | 1.00000 |
| rad8      | 1.81581e-51 | 1.00000 | 1.81581e-51 | 1.00000 |

10.0000000 Pa, 300.000000 K

| Rate constant             | True (fraction)        | Effective (fraction)   |
|---------------------------|------------------------|------------------------|
| Total                     | 5.34809e-14 (1.00 )    | 5.34809e-14 (1.00 )    |
| Formation of rad19        | 5.34010e-14 (0.999 )   | 5.34010e-14 (0.999 )   |
| H-abstraction to cyc2enyl | 7.95823e-17 (0.00149 ) | 7.95823e-17 (0.00149 ) |
| H-abstraction to cyclenyl | 3.44981e-19 (6.45e-06) | 3.44981e-19 (6.45e-06) |

| species                       | PYtrue      | Cumul    | PYeffective | Cumul    |
|-------------------------------|-------------|----------|-------------|----------|
| Indene+H                      | 0.997940    | 0.997940 | 0.997940    | 0.997940 |
| Benzene+cycloprop-2-enylidene | 0.00148805  | 0.999428 | 0.00148805  | 0.999428 |
| PhCHCCH2+H                    | 0.000523283 | 0.999952 | 0.000523283 | 0.999952 |
| PhCCH+CH3                     | 9.66419e-06 | 0.999961 | 9.66419e-06 | 0.999961 |
| C2H2+PhCH2                    | 8.28585e-06 | 0.999970 | 8.28585e-06 | 0.999970 |
| rad6                          | 6.61772e-06 | 0.999976 | 6.61772e-06 | 0.999976 |
| Benzene+cycloprop-1-enylidene | 6.45054e-06 | 0.999983 | 6.45054e-06 | 0.999983 |
| PhCCCH3+H                     | 6.21432e-06 | 0.999989 | 6.21432e-06 | 0.999989 |
| Ph+MeAc                       | 5.81351e-06 | 0.999995 | 5.81351e-06 | 0.999995 |
| rad9                          | 2.18485e-06 | 0.999997 | 2.18485e-06 | 0.999997 |
| rad67                         | 1.74670e-06 | 0.999999 | 1.74670e-06 | 0.999999 |
| rad35                         | 7.22514e-07 | 0.999999 | 7.22514e-07 | 0.999999 |
| Ph+Allene                     | 5.93474e-07 | 1.000000 | 5.93474e-07 | 1.000000 |
| PhCH2CCH+H                    | 1.21131e-07 | 1.000000 | 1.21131e-07 | 1.000000 |
| PAH7+H                        | 7.00774e-08 | 1.000000 | 7.00774e-08 | 1.000000 |
| rad37                         | 2.76107e-08 | 1.000000 | 2.76107e-08 | 1.000000 |
| rad39                         | 1.72506e-08 | 1.000000 | 1.72506e-08 | 1.000000 |
| rad30                         | 1.35042e-08 | 1.000000 | 1.35042e-08 | 1.000000 |
| rad28                         | 9.12789e-09 | 1.000000 | 9.12789e-09 | 1.000000 |
| rad2                          | 6.88860e-09 | 1.000000 | 6.88860e-09 | 1.000000 |
| rad15                         | 1.63515e-09 | 1.000000 | 1.63515e-09 | 1.000000 |
| PAH9+H                        | 1.34473e-09 | 1.000000 | 1.34473e-09 | 1.000000 |
| rad7                          | 1.33799e-09 | 1.000000 | 1.33799e-09 | 1.000000 |
| rad26                         | 1.24309e-09 | 1.000000 | 1.24309e-09 | 1.000000 |
| rad38                         | 6.53307e-10 | 1.000000 | 6.53307e-10 | 1.000000 |
| rad1                          | 5.19085e-10 | 1.000000 | 5.19085e-10 | 1.000000 |
| rad10                         | 5.07298e-10 | 1.000000 | 5.07298e-10 | 1.000000 |
| rad11                         | 4.22346e-10 | 1.000000 | 4.22346e-10 | 1.000000 |
| PhcycC3H3_A+H                 | 3.25067e-10 | 1.000000 | 3.25067e-10 | 1.000000 |
| rad23                         | 2.68308e-10 | 1.000000 | 2.68308e-10 | 1.000000 |
| PAH10+CH3                     | 2.32054e-10 | 1.000000 | 2.32054e-10 | 1.000000 |
| rad60syn                      | 1.03415e-10 | 1.000000 | 1.03415e-10 | 1.000000 |
| PAH3+H                        | 9.55655e-11 | 1.000000 | 9.55655e-11 | 1.000000 |
| rad3                          | 8.33177e-11 | 1.000000 | 8.33177e-11 | 1.000000 |
| rad60anti                     | 5.33964e-11 | 1.000000 | 5.33964e-11 | 1.000000 |
| rad46                         | 4.35466e-11 | 1.000000 | 4.35466e-11 | 1.000000 |
| rad4                          | 4.14343e-11 | 1.000000 | 4.14343e-11 | 1.000000 |

|                |             |         |             |         |
|----------------|-------------|---------|-------------|---------|
| rad59          | 1.62229e-11 | 1.00000 | 1.62229e-11 | 1.00000 |
| rad45          | 1.10304e-11 | 1.00000 | 1.10304e-11 | 1.00000 |
| PhcycC3H3_B+H  | 1.05924e-11 | 1.00000 | 1.05924e-11 | 1.00000 |
| Phenyl+cycC3H4 | 8.20984e-12 | 1.00000 | 0.00000     | 1.00000 |
| rad54          | 5.59783e-12 | 1.00000 | 5.59783e-12 | 1.00000 |
| rad43          | 5.50722e-12 | 1.00000 | 5.50722e-12 | 1.00000 |
| rad13          | 4.60398e-12 | 1.00000 | 4.60398e-12 | 1.00000 |
| rad62          | 1.14257e-12 | 1.00000 | 1.14257e-12 | 1.00000 |
| rad22          | 9.64732e-13 | 1.00000 | 9.64732e-13 | 1.00000 |
| rad50          | 8.42270e-13 | 1.00000 | 8.42270e-13 | 1.00000 |
| rad36          | 3.75946e-13 | 1.00000 | 3.75946e-13 | 1.00000 |
| rad70          | 2.50146e-13 | 1.00000 | 2.50146e-13 | 1.00000 |
| PAH1+H         | 1.63304e-13 | 1.00000 | 1.63304e-13 | 1.00000 |
| rad55          | 1.01470e-13 | 1.00000 | 1.01470e-13 | 1.00000 |
| rad12          | 2.27386e-14 | 1.00000 | 2.27386e-14 | 1.00000 |
| rad52          | 1.21594e-14 | 1.00000 | 1.21594e-14 | 1.00000 |
| rad58          | 1.09344e-14 | 1.00000 | 1.09344e-14 | 1.00000 |
| rad34          | 1.06939e-14 | 1.00000 | 1.06939e-14 | 1.00000 |
| rad33          | 8.63112e-15 | 1.00000 | 8.63112e-15 | 1.00000 |
| rad14          | 8.58749e-15 | 1.00000 | 8.58749e-15 | 1.00000 |
| rad51          | 7.05807e-15 | 1.00000 | 7.05807e-15 | 1.00000 |
| rad27          | 6.86213e-15 | 1.00000 | 6.86213e-15 | 1.00000 |
| rad19anti      | 4.66794e-15 | 1.00000 | 4.66794e-15 | 1.00000 |
| rad25          | 4.03721e-15 | 1.00000 | 4.03721e-15 | 1.00000 |
| rad41          | 3.55306e-15 | 1.00000 | 3.55306e-15 | 1.00000 |
| rad42          | 1.70908e-15 | 1.00000 | 1.70908e-15 | 1.00000 |
| rad65          | 2.00921e-16 | 1.00000 | 2.00921e-16 | 1.00000 |
| rad53          | 1.16471e-16 | 1.00000 | 1.16471e-16 | 1.00000 |
| rad18          | 8.45503e-17 | 1.00000 | 8.45503e-17 | 1.00000 |
| rad5           | 5.86521e-17 | 1.00000 | 5.86521e-17 | 1.00000 |
| rad64          | 4.55602e-17 | 1.00000 | 4.55602e-17 | 1.00000 |
| rad20          | 3.96867e-17 | 1.00000 | 3.96867e-17 | 1.00000 |
| rad61          | 2.78681e-17 | 1.00000 | 2.78681e-17 | 1.00000 |
| rad21          | 2.76263e-17 | 1.00000 | 2.76263e-17 | 1.00000 |
| rad56          | 2.99907e-18 | 1.00000 | 2.99907e-18 | 1.00000 |
| rad31          | 1.55371e-18 | 1.00000 | 1.55371e-18 | 1.00000 |
| rad68syn       | 3.97246e-19 | 1.00000 | 3.97246e-19 | 1.00000 |
| rad68anti      | 2.85921e-19 | 1.00000 | 2.85921e-19 | 1.00000 |
| rad24          | 1.23335e-19 | 1.00000 | 1.23335e-19 | 1.00000 |
| rad40syn       | 1.38260e-20 | 1.00000 | 1.38260e-20 | 1.00000 |
| rad40anti      | 1.05335e-20 | 1.00000 | 1.05335e-20 | 1.00000 |
| PAH8+H         | 5.71868e-21 | 1.00000 | 5.71868e-21 | 1.00000 |
| rad73          | 6.87921e-22 | 1.00000 | 6.87921e-22 | 1.00000 |
| rad19syn       | 1.12387e-22 | 1.00000 | 1.12387e-22 | 1.00000 |
| rad71          | 2.28238e-23 | 1.00000 | 2.28238e-23 | 1.00000 |
| rad47          | 1.36613e-23 | 1.00000 | 1.36613e-23 | 1.00000 |
| rad72          | 5.80845e-30 | 1.00000 | 5.80845e-30 | 1.00000 |
| rad8           | 5.66644e-40 | 1.00000 | 5.66644e-40 | 1.00000 |

10.000000 Pa, 310.000000 K

| Rate constant             | True (fraction)        | Effective (fraction)   |
|---------------------------|------------------------|------------------------|
| Total                     | 5.92544e-14 (1.00)     | 5.92544e-14 (1.00)     |
| Formation of rad19        | 5.91462e-14 (0.998)    | 5.91462e-14 (0.998)    |
| H-abstraction to cyc2enyl | 1.07628e-16 (0.00182)  | 1.07628e-16 (0.00182)  |
| H-abstraction to cyclenyl | 5.62537e-19 (9.49e-06) | 5.62537e-19 (9.49e-06) |

| species                       | PYtrue      | Cumul    | PYeffective | Cumul    |
|-------------------------------|-------------|----------|-------------|----------|
| Indene+H                      | 0.997542    | 0.997542 | 0.997542    | 0.997542 |
| Benzene+cycloprop-2-enylidene | 0.00181637  | 0.999359 | 0.00181637  | 0.999359 |
| PhCHCCH2+H                    | 0.000589539 | 0.999948 | 0.000589539 | 0.999948 |
| PhCCH+CH3                     | 9.84615e-06 | 0.999958 | 9.84615e-06 | 0.999958 |
| Benzene+cycloprop-1-enylidene | 9.49359e-06 | 0.999968 | 9.49359e-06 | 0.999968 |
| C2H2+PhCH2                    | 8.08620e-06 | 0.999976 | 8.08620e-06 | 0.999976 |
| rad6                          | 7.41382e-06 | 0.999983 | 7.41382e-06 | 0.999983 |
| PhCCCH3+H                     | 6.72617e-06 | 0.999990 | 6.72617e-06 | 0.999990 |
| Ph+MeAc                       | 6.43939e-06 | 0.999996 | 6.43939e-06 | 0.999996 |
| rad67                         | 1.87914e-06 | 0.999998 | 1.87914e-06 | 0.999998 |
| rad35                         | 7.86504e-07 | 0.999999 | 7.86504e-07 | 0.999999 |
| Ph+Allene                     | 6.98955e-07 | 1.000000 | 6.98955e-07 | 1.000000 |
| rad9                          | 1.90909e-07 | 1.000000 | 1.90909e-07 | 1.000000 |
| PhCH2CCH+H                    | 1.21853e-07 | 1.000000 | 1.21853e-07 | 1.000000 |
| PAH7+H                        | 6.46008e-08 | 1.000000 | 6.46008e-08 | 1.000000 |
| rad37                         | 2.77312e-08 | 1.000000 | 2.77312e-08 | 1.000000 |
| rad39                         | 1.80547e-08 | 1.000000 | 1.80547e-08 | 1.000000 |
| rad30                         | 1.52357e-08 | 1.000000 | 1.52357e-08 | 1.000000 |
| rad28                         | 1.03160e-08 | 1.000000 | 1.03160e-08 | 1.000000 |
| rad2                          | 7.70321e-09 | 1.000000 | 7.70321e-09 | 1.000000 |

|                |             |         |             |         |
|----------------|-------------|---------|-------------|---------|
| rad7           | 1.51079e-09 | 1.00000 | 1.51079e-09 | 1.00000 |
| PAH9+H         | 1.26047e-09 | 1.00000 | 1.26047e-09 | 1.00000 |
| rad26          | 1.00946e-09 | 1.00000 | 1.00946e-09 | 1.00000 |
| rad38          | 7.02435e-10 | 1.00000 | 7.02435e-10 | 1.00000 |
| rad10          | 6.03614e-10 | 1.00000 | 6.03614e-10 | 1.00000 |
| rad1           | 5.98780e-10 | 1.00000 | 5.98780e-10 | 1.00000 |
| rad11          | 5.09541e-10 | 1.00000 | 5.09541e-10 | 1.00000 |
| PhcycC3H3_A+H  | 4.08508e-10 | 1.00000 | 4.08508e-10 | 1.00000 |
| rad23          | 2.76310e-10 | 1.00000 | 2.76310e-10 | 1.00000 |
| PAH10+CH3      | 2.34822e-10 | 1.00000 | 2.34822e-10 | 1.00000 |
| rad15          | 1.38005e-10 | 1.00000 | 1.38005e-10 | 1.00000 |
| rad60syn       | 1.19408e-10 | 1.00000 | 1.19408e-10 | 1.00000 |
| PAH3+H         | 1.00818e-10 | 1.00000 | 1.00818e-10 | 1.00000 |
| rad3           | 8.97249e-11 | 1.00000 | 8.97249e-11 | 1.00000 |
| rad60anti      | 6.14541e-11 | 1.00000 | 6.14541e-11 | 1.00000 |
| rad4           | 4.79524e-11 | 1.00000 | 4.79524e-11 | 1.00000 |
| rad46          | 4.51243e-11 | 1.00000 | 4.51243e-11 | 1.00000 |
| rad59          | 1.84658e-11 | 1.00000 | 1.84658e-11 | 1.00000 |
| PhcycC3H3_B+H  | 1.41358e-11 | 1.00000 | 1.41358e-11 | 1.00000 |
| Phenyl+cycC3H4 | 1.07882e-11 | 1.00000 | 0.00000     | 1.00000 |
| rad45          | 1.00087e-11 | 1.00000 | 1.00087e-11 | 1.00000 |
| rad43          | 6.52928e-12 | 1.00000 | 6.52928e-12 | 1.00000 |
| rad54          | 5.63964e-12 | 1.00000 | 5.63964e-12 | 1.00000 |
| rad13          | 4.74710e-12 | 1.00000 | 4.74710e-12 | 1.00000 |
| rad62          | 1.32364e-12 | 1.00000 | 1.32364e-12 | 1.00000 |
| rad50          | 8.90424e-13 | 1.00000 | 8.90424e-13 | 1.00000 |
| rad22          | 7.83972e-13 | 1.00000 | 7.83972e-13 | 1.00000 |
| rad36          | 6.63584e-13 | 1.00000 | 6.63584e-13 | 1.00000 |
| rad70          | 2.72917e-13 | 1.00000 | 2.72917e-13 | 1.00000 |
| PAH1+H         | 2.24802e-13 | 1.00000 | 2.24802e-13 | 1.00000 |
| rad55          | 1.09586e-13 | 1.00000 | 1.09586e-13 | 1.00000 |
| rad58          | 1.44154e-14 | 1.00000 | 1.44154e-14 | 1.00000 |
| rad52          | 1.26751e-14 | 1.00000 | 1.26751e-14 | 1.00000 |
| rad34          | 1.18356e-14 | 1.00000 | 1.18356e-14 | 1.00000 |
| rad14          | 9.01490e-15 | 1.00000 | 9.01490e-15 | 1.00000 |
| rad51          | 7.85937e-15 | 1.00000 | 7.85937e-15 | 1.00000 |
| rad33          | 6.98183e-15 | 1.00000 | 6.98183e-15 | 1.00000 |
| rad27          | 6.55838e-15 | 1.00000 | 6.55838e-15 | 1.00000 |
| rad41          | 4.60203e-15 | 1.00000 | 4.60203e-15 | 1.00000 |
| rad25          | 3.62530e-15 | 1.00000 | 3.62530e-15 | 1.00000 |
| rad42          | 2.14085e-15 | 1.00000 | 2.14085e-15 | 1.00000 |
| rad12          | 1.20464e-15 | 1.00000 | 1.20464e-15 | 1.00000 |
| rad19anti      | 2.26201e-16 | 1.00000 | 2.26201e-16 | 1.00000 |
| rad65          | 2.23573e-16 | 1.00000 | 2.23573e-16 | 1.00000 |
| rad53          | 1.31296e-16 | 1.00000 | 1.31296e-16 | 1.00000 |
| rad64          | 4.94681e-17 | 1.00000 | 4.94681e-17 | 1.00000 |
| rad61          | 3.75210e-17 | 1.00000 | 3.75210e-17 | 1.00000 |
| rad5           | 3.14149e-17 | 1.00000 | 3.14149e-17 | 1.00000 |
| rad18          | 1.97898e-17 | 1.00000 | 1.97898e-17 | 1.00000 |
| rad20          | 5.90391e-18 | 1.00000 | 5.90391e-18 | 1.00000 |
| rad21          | 3.79576e-18 | 1.00000 | 3.79576e-18 | 1.00000 |
| rad56          | 3.28159e-18 | 1.00000 | 3.28159e-18 | 1.00000 |
| rad31          | 7.59862e-19 | 1.00000 | 7.59862e-19 | 1.00000 |
| rad68syn       | 4.78447e-19 | 1.00000 | 4.78447e-19 | 1.00000 |
| rad68anti      | 3.47794e-19 | 1.00000 | 3.47794e-19 | 1.00000 |
| rad24          | 9.46011e-20 | 1.00000 | 9.46011e-20 | 1.00000 |
| rad40syn       | 1.77573e-20 | 1.00000 | 1.77573e-20 | 1.00000 |
| rad40anti      | 1.42697e-20 | 1.00000 | 1.42697e-20 | 1.00000 |
| PAH8+H         | 5.66984e-21 | 1.00000 | 5.66984e-21 | 1.00000 |
| rad73          | 6.99309e-22 | 1.00000 | 6.99309e-22 | 1.00000 |
| rad71          | 1.38773e-23 | 1.00000 | 1.38773e-23 | 1.00000 |
| rad47          | 3.37028e-24 | 1.00000 | 3.37028e-24 | 1.00000 |
| rad19syn       | 1.62281e-26 | 1.00000 | 1.62281e-26 | 1.00000 |
| rad8           | 6.05492e-51 | 1.00000 | 6.05492e-51 | 1.00000 |

10.000000 Pa, 400.000000 K

| Rate constant             | True (fraction)        | Effective (fraction)   |
|---------------------------|------------------------|------------------------|
| Total                     | 1.29463e-13 (1.00 )    | 1.29463e-13 (1.00 )    |
| Formation of rad19        | 1.28526e-13 (0.993 )   | 1.28526e-13 (0.993 )   |
| H-abstraction to cyc2enyl | 9.19357e-16 (0.00710 ) | 9.19357e-16 (0.00710 ) |
| H-abstraction to cyclenyl | 1.69485e-17 (0.000131) | 1.69485e-17 (0.000131) |

| species                       | PYtrue      | Cumul    | PYeffective | Cumul    |
|-------------------------------|-------------|----------|-------------|----------|
| Indene+H                      | 0.991685    | 0.991685 | 0.991685    | 0.991685 |
| Benzene+cycloprop-2-enylidene | 0.00710133  | 0.998786 | 0.00710133  | 0.998786 |
| PhCHCCH2+H                    | 0.00100125  | 0.999787 | 0.00100125  | 0.999787 |
| Benzene+cycloprop-1-enylidene | 0.000130914 | 0.999918 | 0.000130914 | 0.999918 |

|                |             |          |             |          |
|----------------|-------------|----------|-------------|----------|
| C2H2+PhCH2     | 2.11379e-05 | 0.999939 | 2.11379e-05 | 0.999939 |
| PhCCH+CH3      | 1.90115e-05 | 0.999958 | 1.90115e-05 | 0.999958 |
| Ph+MeAc        | 1.43909e-05 | 0.999973 | 1.43909e-05 | 0.999973 |
| PhCCCH3+H      | 1.31122e-05 | 0.999986 | 1.31122e-05 | 0.999986 |
| rad67          | 4.20438e-06 | 0.999990 | 4.20438e-06 | 0.999990 |
| rad6           | 3.22535e-06 | 0.999993 | 3.22535e-06 | 0.999993 |
| Ph+Allene      | 2.70288e-06 | 0.999996 | 2.70288e-06 | 0.999996 |
| rad35          | 1.68199e-06 | 0.999998 | 1.68199e-06 | 0.999998 |
| rad9           | 9.48440e-07 | 0.999999 | 9.48440e-07 | 0.999999 |
| PhCH2CCH+H     | 6.36413e-07 | 0.999999 | 6.36413e-07 | 0.999999 |
| PAH7+H         | 2.60513e-07 | 0.999999 | 2.60513e-07 | 0.999999 |
| rad37          | 8.76078e-08 | 1.000000 | 8.76078e-08 | 1.000000 |
| rad39          | 6.33531e-08 | 1.000000 | 6.33531e-08 | 1.000000 |
| rad30          | 3.37855e-08 | 1.000000 | 3.37855e-08 | 1.000000 |
| PAH9+H         | 5.31541e-09 | 1.000000 | 5.31541e-09 | 1.000000 |
| PhcycC3H3_A+H  | 4.88864e-09 | 1.000000 | 4.88864e-09 | 1.000000 |
| rad28          | 4.38192e-09 | 1.000000 | 4.38192e-09 | 1.000000 |
| rad2           | 3.40614e-09 | 1.000000 | 3.40614e-09 | 1.000000 |
| rad38          | 2.94295e-09 | 1.000000 | 2.94295e-09 | 1.000000 |
| PAH10+CH3      | 1.93427e-09 | 1.000000 | 1.93427e-09 | 1.000000 |
| rad15          | 7.06947e-10 | 1.000000 | 7.06947e-10 | 1.000000 |
| rad7           | 6.37553e-10 | 1.000000 | 6.37553e-10 | 1.000000 |
| PAH3+H         | 5.30419e-10 | 1.000000 | 5.30419e-10 | 1.000000 |
| rad26          | 4.81356e-10 | 1.000000 | 4.81356e-10 | 1.000000 |
| PhcycC3H3_B+H  | 4.15259e-10 | 1.000000 | 4.15259e-10 | 1.000000 |
| rad60syn       | 3.75543e-10 | 1.000000 | 3.75543e-10 | 1.000000 |
| rad1           | 3.16989e-10 | 1.000000 | 3.16989e-10 | 1.000000 |
| rad10          | 2.48846e-10 | 1.000000 | 2.48846e-10 | 1.000000 |
| Phenyl+cycC3H4 | 2.22328e-10 | 1.000000 | 0.000000    | 1.000000 |
| rad46          | 2.16915e-10 | 1.000000 | 2.16915e-10 | 1.000000 |
| rad11          | 2.00950e-10 | 1.000000 | 2.00950e-10 | 1.000000 |
| rad60anti      | 1.99961e-10 | 1.000000 | 1.99961e-10 | 1.000000 |
| rad23          | 1.67871e-10 | 1.000000 | 1.67871e-10 | 1.000000 |
| rad59          | 8.42573e-11 | 1.000000 | 8.42573e-11 | 1.000000 |
| rad54          | 5.85504e-11 | 1.000000 | 5.85504e-11 | 1.000000 |
| rad3           | 4.43490e-11 | 1.000000 | 4.43490e-11 | 1.000000 |
| rad43          | 3.45227e-11 | 1.000000 | 3.45227e-11 | 1.000000 |
| rad4           | 2.33558e-11 | 1.000000 | 2.33558e-11 | 1.000000 |
| rad45          | 8.62926e-12 | 1.000000 | 8.62926e-12 | 1.000000 |
| rad50          | 7.87069e-12 | 1.000000 | 7.87069e-12 | 1.000000 |
| rad62          | 7.06178e-12 | 1.000000 | 7.06178e-12 | 1.000000 |
| rad19anti      | 5.72756e-12 | 1.000000 | 5.72756e-12 | 1.000000 |
| rad70          | 3.62668e-12 | 1.000000 | 3.62668e-12 | 1.000000 |
| PAH1+H         | 3.45199e-12 | 1.000000 | 3.45199e-12 | 1.000000 |
| rad13          | 2.40670e-12 | 1.000000 | 2.40670e-12 | 1.000000 |
| rad55          | 1.48155e-12 | 1.000000 | 1.48155e-12 | 1.000000 |
| rad22          | 4.31231e-13 | 1.000000 | 4.31231e-13 | 1.000000 |
| rad36          | 3.30616e-13 | 1.000000 | 3.30616e-13 | 1.000000 |
| rad34          | 2.32213e-13 | 1.000000 | 2.32213e-13 | 1.000000 |
| rad58          | 1.68786e-13 | 1.000000 | 1.68786e-13 | 1.000000 |
| rad52          | 1.65498e-13 | 1.000000 | 1.65498e-13 | 1.000000 |
| rad51          | 1.38304e-13 | 1.000000 | 1.38304e-13 | 1.000000 |
| rad41          | 6.83988e-14 | 1.000000 | 6.83988e-14 | 1.000000 |
| rad42          | 2.66261e-14 | 1.000000 | 2.66261e-14 | 1.000000 |
| rad12          | 1.60770e-14 | 1.000000 | 1.60770e-14 | 1.000000 |
| rad53          | 6.63408e-15 | 1.000000 | 6.63408e-15 | 1.000000 |
| rad33          | 5.09076e-15 | 1.000000 | 5.09076e-15 | 1.000000 |
| rad14          | 4.56170e-15 | 1.000000 | 4.56170e-15 | 1.000000 |
| rad65          | 4.25773e-15 | 1.000000 | 4.25773e-15 | 1.000000 |
| rad27          | 3.70727e-15 | 1.000000 | 3.70727e-15 | 1.000000 |
| rad61          | 3.44797e-15 | 1.000000 | 3.44797e-15 | 1.000000 |
| rad64          | 2.95103e-15 | 1.000000 | 2.95103e-15 | 1.000000 |
| rad25          | 2.16730e-15 | 1.000000 | 2.16730e-15 | 1.000000 |
| rad56          | 5.22602e-16 | 1.000000 | 5.22602e-16 | 1.000000 |
| rad68syn       | 7.40813e-17 | 1.000000 | 7.40813e-17 | 1.000000 |
| rad68anti      | 5.19456e-17 | 1.000000 | 5.19456e-17 | 1.000000 |
| rad18          | 4.68057e-17 | 1.000000 | 4.68057e-17 | 1.000000 |
| rad20          | 3.79713e-17 | 1.000000 | 3.79713e-17 | 1.000000 |
| rad21          | 2.83670e-17 | 1.000000 | 2.83670e-17 | 1.000000 |
| rad5           | 2.27897e-17 | 1.000000 | 2.27897e-17 | 1.000000 |
| rad19syn       | 2.04435e-17 | 1.000000 | 2.04435e-17 | 1.000000 |
| rad31          | 1.79502e-17 | 1.000000 | 1.79502e-17 | 1.000000 |
| rad40syn       | 6.43635e-18 | 1.000000 | 6.43635e-18 | 1.000000 |
| PAH8+H         | 6.00065e-18 | 1.000000 | 6.00065e-18 | 1.000000 |
| rad40anti      | 4.78611e-18 | 1.000000 | 4.78611e-18 | 1.000000 |
| rad73          | 5.12608e-19 | 1.000000 | 5.12608e-19 | 1.000000 |
| rad24          | 1.33124e-19 | 1.000000 | 1.33124e-19 | 1.000000 |
| rad71          | 5.62234e-20 | 1.000000 | 5.62234e-20 | 1.000000 |
| rad47          | 7.09858e-22 | 1.000000 | 7.09858e-22 | 1.000000 |
| rad72          | 4.09728e-24 | 1.000000 | 4.09728e-24 | 1.000000 |

rad8 | 1.02198e-36 1.000000 | 1.02198e-36 1.000000

10.000000 Pa, 500.000000 K

=====  
Rate constant | True (fraction) Effective (fraction)  
-----  
Total | 2.52837e-13 (1.00 ) 2.52837e-13 (1.00 )  
Formation of rad19 | 2.47941e-13 (0.981 ) 2.47941e-13 (0.981 )  
H-abstraction to cyc2enyl | 4.69058e-15 (0.0186 ) 4.69058e-15 (0.0186 )  
H-abstraction to cyc1enyl | 2.05381e-16 (0.000812) 2.05381e-16 (0.000812)

| species                       | PYtrue      | Cumul    | PYeffective | Cumul    |
|-------------------------------|-------------|----------|-------------|----------|
| Indene+H                      | 0.978429    | 0.978429 | 0.978429    | 0.978429 |
| Benzene+cycloprop-2-enylidene | 0.0185518   | 0.996980 | 0.0185518   | 0.996980 |
| PhCHCCH2+H                    | 0.00202267  | 0.999003 | 0.00202267  | 0.999003 |
| Benzene+cycloprop-1-enylidene | 0.000812306 | 0.999815 | 0.000812306 | 0.999815 |
| C2H2+PhCH2                    | 5.08092e-05 | 0.999866 | 5.08092e-05 | 0.999866 |
| PhCCH+CH3                     | 3.68861e-05 | 0.999903 | 3.68861e-05 | 0.999903 |
| Ph+MeAc                       | 3.62609e-05 | 0.999939 | 3.62609e-05 | 0.999939 |
| PhCCCH3+H                     | 2.84211e-05 | 0.999968 | 2.84211e-05 | 0.999968 |
| Ph+Allene                     | 1.06872e-05 | 0.999978 | 1.06872e-05 | 0.999978 |
| rad67                         | 1.05780e-05 | 0.999989 | 1.05780e-05 | 0.999989 |
| rad35                         | 4.10730e-06 | 0.999993 | 4.10730e-06 | 0.999993 |
| PhCH2CCH+H                    | 2.89410e-06 | 0.999996 | 2.89410e-06 | 0.999996 |
| rad9                          | 1.31405e-06 | 0.999997 | 1.31405e-06 | 0.999997 |
| rad6                          | 1.08235e-06 | 0.999998 | 1.08235e-06 | 0.999998 |
| PAH7+H                        | 8.28918e-07 | 0.999999 | 8.28918e-07 | 0.999999 |
| rad37                         | 2.86503e-07 | 0.999999 | 2.86503e-07 | 0.999999 |
| rad39                         | 1.96700e-07 | 1.000000 | 1.96700e-07 | 1.000000 |
| rad30                         | 8.93450e-08 | 1.000000 | 8.93450e-08 | 1.000000 |
| PhcycC3H3_A+H                 | 5.03115e-08 | 1.000000 | 5.03115e-08 | 1.000000 |
| PAH9+H                        | 2.04116e-08 | 1.000000 | 2.04116e-08 | 1.000000 |
| PAH10+CH3                     | 1.44327e-08 | 1.000000 | 1.44327e-08 | 1.000000 |
| rad38                         | 1.30889e-08 | 1.000000 | 1.30889e-08 | 1.000000 |
| PhcycC3H3_B+H                 | 7.82403e-09 | 1.000000 | 7.82403e-09 | 1.000000 |
| Phenyl+cycC3H4                | 3.55660e-09 | 1.000000 | 0.000000    | 1.000000 |
| PAH3+H                        | 2.97809e-09 | 1.000000 | 2.97809e-09 | 1.000000 |
| rad2                          | 2.05620e-09 | 1.000000 | 2.05620e-09 | 1.000000 |
| rad28                         | 1.45205e-09 | 1.000000 | 1.45205e-09 | 1.000000 |
| rad60syn                      | 1.43068e-09 | 1.000000 | 1.43068e-09 | 1.000000 |
| rad46                         | 1.03702e-09 | 1.000000 | 1.03702e-09 | 1.000000 |
| rad15                         | 9.95336e-10 | 1.000000 | 9.95336e-10 | 1.000000 |
| rad60anti                     | 7.83815e-10 | 1.000000 | 7.83815e-10 | 1.000000 |
| rad19anti                     | 7.19186e-10 | 1.000000 | 7.19186e-10 | 1.000000 |
| rad23                         | 5.27295e-10 | 1.000000 | 5.27295e-10 | 1.000000 |
| rad54                         | 4.58842e-10 | 1.000000 | 4.58842e-10 | 1.000000 |
| rad59                         | 4.42221e-10 | 1.000000 | 4.42221e-10 | 1.000000 |
| rad1                          | 2.45540e-10 | 1.000000 | 2.45540e-10 | 1.000000 |
| rad26                         | 2.17716e-10 | 1.000000 | 2.17716e-10 | 1.000000 |
| rad7                          | 2.14051e-10 | 1.000000 | 2.14051e-10 | 1.000000 |
| rad43                         | 1.96591e-10 | 1.000000 | 1.96591e-10 | 1.000000 |
| rad10                         | 1.29375e-10 | 1.000000 | 1.29375e-10 | 1.000000 |
| rad11                         | 6.83070e-11 | 1.000000 | 6.83070e-11 | 1.000000 |
| rad50                         | 6.64923e-11 | 1.000000 | 6.64923e-11 | 1.000000 |
| rad45                         | 6.03550e-11 | 1.000000 | 6.03550e-11 | 1.000000 |
| PAH1+H                        | 4.65310e-11 | 1.000000 | 4.65310e-11 | 1.000000 |
| rad62                         | 3.74821e-11 | 1.000000 | 3.74821e-11 | 1.000000 |
| rad70                         | 3.71795e-11 | 1.000000 | 3.71795e-11 | 1.000000 |
| rad3                          | 3.06177e-11 | 1.000000 | 3.06177e-11 | 1.000000 |
| rad4                          | 1.72385e-11 | 1.000000 | 1.72385e-11 | 1.000000 |
| rad55                         | 1.48307e-11 | 1.000000 | 1.48307e-11 | 1.000000 |
| rad34                         | 3.19200e-12 | 1.000000 | 3.19200e-12 | 1.000000 |
| rad36                         | 2.82411e-12 | 1.000000 | 2.82411e-12 | 1.000000 |
| rad51                         | 2.12371e-12 | 1.000000 | 2.12371e-12 | 1.000000 |
| rad58                         | 2.05827e-12 | 1.000000 | 2.05827e-12 | 1.000000 |
| rad52                         | 1.89968e-12 | 1.000000 | 1.89968e-12 | 1.000000 |
| rad13                         | 9.38536e-13 | 1.000000 | 9.38536e-13 | 1.000000 |
| rad41                         | 8.68244e-13 | 1.000000 | 8.68244e-13 | 1.000000 |
| rad22                         | 5.11379e-13 | 1.000000 | 5.11379e-13 | 1.000000 |
| rad42                         | 2.73999e-13 | 1.000000 | 2.73999e-13 | 1.000000 |
| rad53                         | 1.69607e-13 | 1.000000 | 1.69607e-13 | 1.000000 |
| rad19syn                      | 1.45991e-13 | 1.000000 | 1.45991e-13 | 1.000000 |
| rad61                         | 1.42452e-13 | 1.000000 | 1.42452e-13 | 1.000000 |
| rad64                         | 7.68506e-14 | 1.000000 | 7.68506e-14 | 1.000000 |
| rad65                         | 6.76617e-14 | 1.000000 | 6.76617e-14 | 1.000000 |
| rad12                         | 5.76455e-14 | 1.000000 | 5.76455e-14 | 1.000000 |
| rad56                         | 2.63614e-14 | 1.000000 | 2.63614e-14 | 1.000000 |
| rad68syn                      | 3.92668e-15 | 1.000000 | 3.92668e-15 | 1.000000 |
| rad68anti                     | 2.70310e-15 | 1.000000 | 2.70310e-15 | 1.000000 |



|           |             |          |             |          |
|-----------|-------------|----------|-------------|----------|
| rad14     | 2.60953e-15 | 1.000000 | 2.60953e-15 | 1.000000 |
| rad33     | 2.39354e-15 | 1.000000 | 2.39354e-15 | 1.000000 |
| rad27     | 2.27707e-15 | 1.000000 | 2.27707e-15 | 1.000000 |
| rad31     | 1.93757e-15 | 1.000000 | 1.93757e-15 | 1.000000 |
| PAH8+H    | 9.43730e-16 | 1.000000 | 9.43730e-16 | 1.000000 |
| rad25     | 8.84466e-16 | 1.000000 | 8.84466e-16 | 1.000000 |
| rad40syn  | 5.79734e-16 | 1.000000 | 5.79734e-16 | 1.000000 |
| rad40anti | 4.25204e-16 | 1.000000 | 4.25204e-16 | 1.000000 |
| rad73     | 1.73455e-16 | 1.000000 | 1.73455e-16 | 1.000000 |
| rad71     | 9.85647e-17 | 1.000000 | 9.85647e-17 | 1.000000 |
| rad20     | 4.26775e-17 | 1.000000 | 4.26775e-17 | 1.000000 |
| rad21     | 3.60983e-17 | 1.000000 | 3.60983e-17 | 1.000000 |
| rad18     | 2.62614e-17 | 1.000000 | 2.62614e-17 | 1.000000 |
| rad5      | 1.02811e-17 | 1.000000 | 1.02811e-17 | 1.000000 |
| rad24     | 1.31955e-18 | 1.000000 | 1.31955e-18 | 1.000000 |
| rad72     | 1.03233e-18 | 1.000000 | 1.03233e-18 | 1.000000 |
| rad47     | 4.98997e-20 | 1.000000 | 4.98997e-20 | 1.000000 |
| rad8      | 2.11915e-32 | 1.000000 | 2.11915e-32 | 1.000000 |

10.000000 Pa, 600.00000 K

=====

| Rate constant             | True (fraction)        | Effective (fraction)   |
|---------------------------|------------------------|------------------------|
| Total                     | 4.35570e-13 (1.00 )    | 4.35570e-13 (1.00 )    |
| Formation of rad19        | 4.18892e-13 (0.962 )   | 4.18892e-13 (0.962 )   |
| H-abstraction to cyc2enyl | 1.54751e-14 (0.0355 )  | 1.54751e-14 (0.0355 )  |
| H-abstraction to cyc1enyl | 1.20343e-15 (0.00276 ) | 1.20343e-15 (0.00276 ) |

| species                       | PYtrue      | Cumul    | PYeffective | Cumul    |
|-------------------------------|-------------|----------|-------------|----------|
| Indene+H                      | 0.957269    | 0.957269 | 0.957269    | 0.957269 |
| Benzene+cycloprop-2-enylidene | 0.0355285   | 0.992798 | 0.0355285   | 0.992798 |
| PhCHCCH2+H                    | 0.00402470  | 0.996823 | 0.00402470  | 0.996823 |
| Benzene+cycloprop-1-enylidene | 0.00276289  | 0.999585 | 0.00276289  | 0.999585 |
| C2H2+PhCH2                    | 0.000111873 | 0.999697 | 0.000111873 | 0.999697 |
| Ph+MeAc                       | 8.58424e-05 | 0.999783 | 8.58424e-05 | 0.999783 |
| PhCCH+CH3                     | 6.74577e-05 | 0.999851 | 6.74577e-05 | 0.999851 |
| PhCCCH3+H                     | 5.90944e-05 | 0.999910 | 5.90944e-05 | 0.999910 |
| Ph+Allene                     | 3.55140e-05 | 0.999945 | 3.55140e-05 | 0.999945 |
| rad67                         | 2.54402e-05 | 0.999971 | 2.54402e-05 | 0.999971 |
| PhCH2CCH+H                    | 1.08921e-05 | 0.999982 | 1.08921e-05 | 0.999982 |
| rad35                         | 9.64632e-06 | 0.999991 | 9.64632e-06 | 0.999991 |
| rad9                          | 3.63877e-06 | 0.999995 | 3.63877e-06 | 0.999995 |
| PAH7+H                        | 2.25459e-06 | 0.999997 | 2.25459e-06 | 0.999997 |
| rad37                         | 8.66703e-07 | 0.999998 | 8.66703e-07 | 0.999998 |
| rad39                         | 5.17317e-07 | 0.999998 | 5.17317e-07 | 0.999998 |
| PhcycC3H3_A+H                 | 3.58293e-07 | 0.999999 | 3.58293e-07 | 0.999999 |
| rad6                          | 2.93372e-07 | 0.999999 | 2.93372e-07 | 0.999999 |
| rad30                         | 2.27770e-07 | 0.999999 | 2.27770e-07 | 0.999999 |
| PhcycC3H3_B+H                 | 8.60298e-08 | 0.999999 | 8.60298e-08 | 0.999999 |
| PAH10+CH3                     | 8.56127e-08 | 1.000000 | 8.56127e-08 | 1.000000 |
| PAH9+H                        | 7.15327e-08 | 1.000000 | 7.15327e-08 | 1.000000 |
| rad38                         | 5.23439e-08 | 1.000000 | 5.23439e-08 | 1.000000 |
| Phenyl+cycC3H4                | 3.58031e-08 | 1.000000 | 0.000000    | 1.000000 |
| PAH3+H                        | 1.46480e-08 | 1.000000 | 1.46480e-08 | 1.000000 |
| rad19anti                     | 5.07106e-09 | 1.000000 | 5.07106e-09 | 1.000000 |
| rad60syn                      | 5.05428e-09 | 1.000000 | 5.05428e-09 | 1.000000 |
| rad46                         | 4.41505e-09 | 1.000000 | 4.41506e-09 | 1.000000 |
| rad2                          | 3.74613e-09 | 1.000000 | 3.74613e-09 | 1.000000 |
| rad23                         | 3.53220e-09 | 1.000000 | 3.53220e-09 | 1.000000 |
| rad60anti                     | 2.83741e-09 | 1.000000 | 2.83741e-09 | 1.000000 |
| rad15                         | 2.63185e-09 | 1.000000 | 2.63185e-09 | 1.000000 |
| rad54                         | 2.62569e-09 | 1.000000 | 2.62569e-09 | 1.000000 |
| rad59                         | 2.04071e-09 | 1.000000 | 2.04071e-09 | 1.000000 |
| rad43                         | 9.18777e-10 | 1.000000 | 9.18777e-10 | 1.000000 |
| rad45                         | 6.22457e-10 | 1.000000 | 6.22457e-10 | 1.000000 |
| rad1                          | 5.57271e-10 | 1.000000 | 5.57271e-10 | 1.000000 |
| rad50                         | 4.73259e-10 | 1.000000 | 4.73259e-10 | 1.000000 |
| PAH1+H                        | 4.09555e-10 | 1.000000 | 4.09555e-10 | 1.000000 |
| rad28                         | 3.87095e-10 | 1.000000 | 3.87095e-10 | 1.000000 |
| rad70                         | 2.64704e-10 | 1.000000 | 2.64704e-10 | 1.000000 |
| rad26                         | 1.76063e-10 | 1.000000 | 1.76063e-10 | 1.000000 |
| rad62                         | 1.58176e-10 | 1.000000 | 1.58176e-10 | 1.000000 |
| rad10                         | 1.41966e-10 | 1.000000 | 1.41966e-10 | 1.000000 |
| rad55                         | 1.01586e-10 | 1.000000 | 1.01586e-10 | 1.000000 |
| rad7                          | 5.98766e-11 | 1.000000 | 5.98766e-11 | 1.000000 |
| rad3                          | 5.16050e-11 | 1.000000 | 5.16050e-11 | 1.000000 |
| rad36                         | 4.12295e-11 | 1.000000 | 4.12295e-11 | 1.000000 |
| rad4                          | 3.17658e-11 | 1.000000 | 3.17658e-11 | 1.000000 |
| rad34                         | 2.83560e-11 | 1.000000 | 2.83560e-11 | 1.000000 |

|           |             |          |             |          |
|-----------|-------------|----------|-------------|----------|
| rad51     | 2.74533e-11 | 1.000000 | 2.74533e-11 | 1.000000 |
| rad11     | 1.97910e-11 | 1.000000 | 1.97910e-11 | 1.000000 |
| rad58     | 1.83163e-11 | 1.000000 | 1.83163e-11 | 1.000000 |
| rad52     | 1.79131e-11 | 1.000000 | 1.79131e-11 | 1.000000 |
| rad19syn  | 1.52297e-11 | 1.000000 | 1.52297e-11 | 1.000000 |
| rad41     | 7.37610e-12 | 1.000000 | 7.37610e-12 | 1.000000 |
| rad61     | 2.90998e-12 | 1.000000 | 2.90998e-12 | 1.000000 |
| rad22     | 2.61633e-12 | 1.000000 | 2.61633e-12 | 1.000000 |
| rad53     | 2.30365e-12 | 1.000000 | 2.30365e-12 | 1.000000 |
| rad42     | 1.89132e-12 | 1.000000 | 1.89132e-12 | 1.000000 |
| rad12     | 1.03895e-12 | 1.000000 | 1.03895e-12 | 1.000000 |
| rad64     | 1.01185e-12 | 1.000000 | 1.01185e-12 | 1.000000 |
| rad65     | 8.62884e-13 | 1.000000 | 8.62884e-13 | 1.000000 |
| rad56     | 5.80243e-13 | 1.000000 | 5.80243e-13 | 1.000000 |
| rad13     | 3.35613e-13 | 1.000000 | 3.35613e-13 | 1.000000 |
| rad71     | 1.08391e-13 | 1.000000 | 1.08391e-13 | 1.000000 |
| rad68syn  | 9.62478e-14 | 1.000000 | 9.62478e-14 | 1.000000 |
| rad73     | 8.73305e-14 | 1.000000 | 8.73305e-14 | 1.000000 |
| PAH8+H    | 8.35557e-14 | 1.000000 | 8.35557e-14 | 1.000000 |
| rad68anti | 6.51819e-14 | 1.000000 | 6.51819e-14 | 1.000000 |
| rad31     | 3.29227e-14 | 1.000000 | 3.29227e-14 | 1.000000 |
| rad40syn  | 2.49770e-14 | 1.000000 | 2.49770e-14 | 1.000000 |
| rad40anti | 1.87048e-14 | 1.000000 | 1.87048e-14 | 1.000000 |
| rad27     | 3.32110e-15 | 1.000000 | 3.32110e-15 | 1.000000 |
| rad14     | 3.29762e-15 | 1.000000 | 3.29762e-15 | 1.000000 |
| rad72     | 3.08984e-15 | 1.000000 | 3.08984e-15 | 1.000000 |
| rad33     | 1.19016e-15 | 1.000000 | 1.19016e-15 | 1.000000 |
| rad25     | 3.41084e-16 | 1.000000 | 3.41084e-16 | 1.000000 |
| rad21     | 7.88411e-17 | 1.000000 | 7.88411e-17 | 1.000000 |
| rad20     | 7.66735e-17 | 1.000000 | 7.66735e-17 | 1.000000 |
| rad24     | 3.08604e-17 | 1.000000 | 3.08604e-17 | 1.000000 |
| rad18     | 2.18077e-17 | 1.000000 | 2.18077e-17 | 1.000000 |
| rad5      | 8.76116e-18 | 1.000000 | 8.76116e-18 | 1.000000 |
| rad47     | 1.35093e-18 | 1.000000 | 1.35093e-18 | 1.000000 |
| rad8      | 2.87995e-27 | 1.000000 | 2.87995e-27 | 1.000000 |

10.0000000 Pa, 700.000000 K

=====

| Rate constant             | True (fraction)        | Effective (fraction)   |
|---------------------------|------------------------|------------------------|
| Total                     | 6.91694e-13 (1.00 )    | 6.91694e-13 (1.00 )    |
| Formation of rad19        | 6.47922e-13 (0.937 )   | 6.47922e-13 (0.937 )   |
| H-abstraction to cyc2enyl | 3.91858e-14 (0.0567 )  | 3.91858e-14 (0.0567 )  |
| H-abstraction to cyclenyl | 4.58543e-15 (0.00663 ) | 4.58542e-15 (0.00663 ) |

| species                       | PYtrue      | Cumul    | PYeffective | Cumul    |
|-------------------------------|-------------|----------|-------------|----------|
| Indene+H                      | 0.928229    | 0.928229 | 0.928229    | 0.928229 |
| Benzene+cycloprop-2-enylidene | 0.0566520   | 0.984881 | 0.0566520   | 0.984881 |
| PhCHCCH2+H                    | 0.00761464  | 0.992496 | 0.00761464  | 0.992496 |
| Benzene+cycloprop-1-enylidene | 0.00662927  | 0.999125 | 0.00662927  | 0.999125 |
| C2H2+PhCH2                    | 0.000223846 | 0.999349 | 0.000223846 | 0.999349 |
| Ph+MeAc                       | 0.000185285 | 0.999534 | 0.000185285 | 0.999534 |
| PhCCH+CH3                     | 0.000114606 | 0.999649 | 0.000114606 | 0.999649 |
| PhCCCH3+H                     | 0.000114426 | 0.999763 | 0.000114426 | 0.999763 |
| Ph+Allene                     | 9.88941e-05 | 0.999862 | 9.88941e-05 | 0.999862 |
| rad67                         | 5.63368e-05 | 0.999919 | 5.63368e-05 | 0.999919 |
| PhCH2CCH+H                    | 3.38684e-05 | 0.999952 | 3.38684e-05 | 0.999952 |
| rad35                         | 2.09833e-05 | 0.999973 | 2.09833e-05 | 0.999973 |
| rad9                          | 1.39986e-05 | 0.999987 | 1.39986e-05 | 0.999987 |
| PAH7+H                        | 5.25609e-06 | 0.999993 | 5.25609e-06 | 0.999993 |
| rad37                         | 2.32775e-06 | 0.999995 | 2.32775e-06 | 0.999995 |
| PhcycC3H3_A+H                 | 1.86144e-06 | 0.999997 | 1.86144e-06 | 0.999997 |
| rad39                         | 1.15907e-06 | 0.999998 | 1.15907e-06 | 0.999998 |
| PhcycC3H3_B+H                 | 6.13492e-07 | 0.999999 | 6.13493e-07 | 0.999999 |
| rad30                         | 5.37105e-07 | 0.999999 | 5.37105e-07 | 0.999999 |
| PAH10+CH3                     | 3.97895e-07 | 1.000000 | 3.97895e-07 | 1.000000 |
| Phenyl+cycC3H4                | 2.47297e-07 | 1.000000 | 0.000000    | 1.000000 |
| PAH9+H                        | 2.23273e-07 | 1.000000 | 2.23273e-07 | 1.000000 |
| rad38                         | 1.81272e-07 | 1.000000 | 1.81272e-07 | 1.000000 |
| rad6                          | 7.91584e-08 | 1.000000 | 7.91584e-08 | 1.000000 |
| PAH3+H                        | 6.05254e-08 | 1.000000 | 6.05254e-08 | 1.000000 |
| rad46                         | 1.63108e-08 | 1.000000 | 1.63109e-08 | 1.000000 |
| rad60syn                      | 1.58174e-08 | 1.000000 | 1.58174e-08 | 1.000000 |
| rad54                         | 1.12649e-08 | 1.000000 | 1.12650e-08 | 1.000000 |
| rad60anti                     | 9.06305e-09 | 1.000000 | 9.06305e-09 | 1.000000 |
| rad23                         | 7.99118e-09 | 1.000000 | 7.99118e-09 | 1.000000 |
| rad59                         | 7.95385e-09 | 1.000000 | 7.95385e-09 | 1.000000 |
| rad19anti                     | 7.02689e-09 | 1.000000 | 7.02689e-09 | 1.000000 |
| rad15                         | 7.01556e-09 | 1.000000 | 7.01556e-09 | 1.000000 |

|           |             |         |             |         |
|-----------|-------------|---------|-------------|---------|
| rad2      | 5.80160e-09 | 1.00000 | 5.80160e-09 | 1.00000 |
| rad43     | 3.48920e-09 | 1.00000 | 3.48920e-09 | 1.00000 |
| rad50     | 2.71773e-09 | 1.00000 | 2.71773e-09 | 1.00000 |
| PAH1+H    | 2.50600e-09 | 1.00000 | 2.50600e-09 | 1.00000 |
| rad45     | 1.48261e-09 | 1.00000 | 1.48261e-09 | 1.00000 |
| rad70     | 1.36476e-09 | 1.00000 | 1.36476e-09 | 1.00000 |
| rad1      | 1.08332e-09 | 1.00000 | 1.08332e-09 | 1.00000 |
| rad62     | 5.34096e-10 | 1.00000 | 5.34096e-10 | 1.00000 |
| rad55     | 4.99215e-10 | 1.00000 | 4.99215e-10 | 1.00000 |
| rad51     | 2.45842e-10 | 1.00000 | 2.45842e-10 | 1.00000 |
| rad34     | 1.73432e-10 | 1.00000 | 1.73432e-10 | 1.00000 |
| rad26     | 1.60040e-10 | 1.00000 | 1.60040e-10 | 1.00000 |
| rad12     | 1.50707e-10 | 1.00000 | 1.50707e-10 | 1.00000 |
| rad10     | 1.49202e-10 | 1.00000 | 1.49202e-10 | 1.00000 |
| rad36     | 1.35019e-10 | 1.00000 | 1.35019e-10 | 1.00000 |
| rad52     | 1.27948e-10 | 1.00000 | 1.27948e-10 | 1.00000 |
| rad58     | 1.19019e-10 | 1.00000 | 1.19019e-10 | 1.00000 |
| rad28     | 1.00508e-10 | 1.00000 | 1.00508e-10 | 1.00000 |
| rad19syn  | 8.87889e-11 | 1.00000 | 8.87889e-11 | 1.00000 |
| rad3      | 6.70907e-11 | 1.00000 | 6.70907e-11 | 1.00000 |
| rad4      | 4.67203e-11 | 1.00000 | 4.67203e-11 | 1.00000 |
| rad41     | 4.43153e-11 | 1.00000 | 4.43153e-11 | 1.00000 |
| rad61     | 3.17394e-11 | 1.00000 | 3.17394e-11 | 1.00000 |
| rad53     | 1.88558e-11 | 1.00000 | 1.88558e-11 | 1.00000 |
| rad7      | 1.76009e-11 | 1.00000 | 1.76009e-11 | 1.00000 |
| rad42     | 9.33568e-12 | 1.00000 | 9.33568e-12 | 1.00000 |
| rad64     | 7.90190e-12 | 1.00000 | 7.90190e-12 | 1.00000 |
| rad65     | 7.54264e-12 | 1.00000 | 7.54264e-12 | 1.00000 |
| rad56     | 6.49458e-12 | 1.00000 | 6.49458e-12 | 1.00000 |
| rad11     | 6.27564e-12 | 1.00000 | 6.27564e-12 | 1.00000 |
| rad22     | 5.84534e-12 | 1.00000 | 5.84534e-12 | 1.00000 |
| rad71     | 2.29391e-12 | 1.00000 | 2.29391e-12 | 1.00000 |
| rad73     | 1.73237e-12 | 1.00000 | 1.73237e-12 | 1.00000 |
| PAH8+H    | 1.32030e-12 | 1.00000 | 1.32030e-12 | 1.00000 |
| rad68syn  | 1.14140e-12 | 1.00000 | 1.14140e-12 | 1.00000 |
| rad68anti | 7.66733e-13 | 1.00000 | 7.66734e-13 | 1.00000 |
| rad40syn  | 3.61980e-13 | 1.00000 | 3.61980e-13 | 1.00000 |
| rad40anti | 2.71899e-13 | 1.00000 | 2.71899e-13 | 1.00000 |
| rad13     | 1.47250e-13 | 1.00000 | 1.47250e-13 | 1.00000 |
| rad31     | 9.74618e-14 | 1.00000 | 9.74618e-14 | 1.00000 |
| rad72     | 7.31258e-14 | 1.00000 | 7.31258e-14 | 1.00000 |
| rad27     | 5.41643e-15 | 1.00000 | 5.41643e-15 | 1.00000 |
| rad14     | 4.53083e-15 | 1.00000 | 4.53083e-15 | 1.00000 |
| rad33     | 9.85700e-16 | 1.00000 | 9.85700e-16 | 1.00000 |
| rad24     | 5.21706e-16 | 1.00000 | 5.21706e-16 | 1.00000 |
| rad21     | 4.14133e-16 | 1.00000 | 4.14133e-16 | 1.00000 |
| rad20     | 2.94804e-16 | 1.00000 | 2.94804e-16 | 1.00000 |
| rad25     | 1.72622e-16 | 1.00000 | 1.72622e-16 | 1.00000 |
| rad18     | 4.02796e-17 | 1.00000 | 4.02796e-17 | 1.00000 |
| rad47     | 1.61285e-17 | 1.00000 | 1.61285e-17 | 1.00000 |
| rad5      | 8.92153e-18 | 1.00000 | 8.92153e-18 | 1.00000 |
| rad8      | 5.94030e-22 | 1.00000 | 5.94030e-22 | 1.00000 |

10.000000 Pa, 800.000000 K

| Rate constant             | True (fraction)       | Effective (fraction)  |
|---------------------------|-----------------------|-----------------------|
| Total                     | 1.03759e-12 (1.00 )   | 1.03758e-12 (1.00 )   |
| Formation of rad19        | 9.41065e-13 (0.907 )  | 9.41063e-13 (0.907 )  |
| H-abstraction to cyc2enyl | 8.32953e-14 (0.0803 ) | 8.32953e-14 (0.0803 ) |
| H-abstraction to cyc1enyl | 1.32261e-14 (0.0127 ) | 1.32261e-14 (0.0127 ) |

| species                       | PYtrue      | Cumul    | PYeffective | Cumul    |
|-------------------------------|-------------|----------|-------------|----------|
| Indene+H                      | 0.891732    | 0.891732 | 0.891732    | 0.891732 |
| Benzene+cycloprop-2-enylidene | 0.0802780   | 0.972009 | 0.0802781   | 0.972010 |
| PhCHCCH2+H                    | 0.0135177   | 0.985527 | 0.0135177   | 0.985528 |
| Benzene+cycloprop-1-enylidene | 0.0127470   | 0.998274 | 0.0127470   | 0.998275 |
| C2H2+PhCH2                    | 0.000408875 | 0.998683 | 0.000408875 | 0.998684 |
| Ph+MeAc                       | 0.000363023 | 0.999046 | 0.000363024 | 0.999047 |
| Ph+Allene                     | 0.000233949 | 0.999280 | 0.000233950 | 0.999281 |
| PhCCCH3+H                     | 0.000204790 | 0.999485 | 0.000204791 | 0.999486 |
| PhCCH+CH3                     | 0.000181010 | 0.999666 | 0.000181011 | 0.999667 |
| rad67                         | 0.000113838 | 0.999780 | 0.000113838 | 0.999781 |
| PhCH2CCH+H                    | 8.86401e-05 | 0.999868 | 8.86402e-05 | 0.999869 |
| rad9                          | 5.56802e-05 | 0.999924 | 5.56803e-05 | 0.999925 |
| rad35                         | 4.18515e-05 | 0.999966 | 4.18515e-05 | 0.999967 |
| PAH7+H                        | 1.06264e-05 | 0.999976 | 1.06265e-05 | 0.999977 |
| PhcycC3H3_A+H                 | 7.45253e-06 | 0.999984 | 7.45255e-06 | 0.999985 |
| rad37                         | 5.51164e-06 | 0.999989 | 5.51165e-06 | 0.999990 |

|                |             |          |             |          |
|----------------|-------------|----------|-------------|----------|
| PhcycC3H3_B+H  | 3.09995e-06 | 0.999993 | 3.09995e-06 | 0.999993 |
| rad39          | 2.24252e-06 | 0.999995 | 2.24253e-06 | 0.999996 |
| PAH10+CH3      | 1.48752e-06 | 0.999996 | 1.48752e-06 | 0.999997 |
| Phenyl+cycC3H4 | 1.26421e-06 | 0.999998 | 0.00000     | 0.999997 |
| rad30          | 1.15766e-06 | 0.999999 | 1.15766e-06 | 0.999998 |
| PAH9+H         | 6.18852e-07 | 0.999999 | 6.18853e-07 | 0.999999 |
| rad38          | 5.41347e-07 | 1.000000 | 5.41348e-07 | 1.000000 |
| PAH3+H         | 2.11452e-07 | 1.000000 | 2.11452e-07 | 1.000000 |
| rad46          | 5.21020e-08 | 1.000000 | 5.21021e-08 | 1.000000 |
| rad60syn       | 4.35888e-08 | 1.000000 | 4.35889e-08 | 1.000000 |
| rad54          | 3.78208e-08 | 1.000000 | 3.78209e-08 | 1.000000 |
| rad6           | 2.72889e-08 | 1.000000 | 2.72890e-08 | 1.000000 |
| rad59          | 2.63298e-08 | 1.000000 | 2.63298e-08 | 1.000000 |
| rad60anti      | 2.54117e-08 | 1.000000 | 2.54117e-08 | 1.000000 |
| rad15          | 1.70757e-08 | 1.000000 | 1.70757e-08 | 1.000000 |
| rad50          | 1.21030e-08 | 1.000000 | 1.21030e-08 | 1.000000 |
| PAH1+H         | 1.15345e-08 | 1.000000 | 1.15345e-08 | 1.000000 |
| rad43          | 1.10122e-08 | 1.000000 | 1.10123e-08 | 1.000000 |
| rad23          | 9.29767e-09 | 1.000000 | 9.29767e-09 | 1.000000 |
| rad12          | 7.02753e-09 | 1.000000 | 7.02754e-09 | 1.000000 |
| rad19anti      | 6.05689e-09 | 1.000000 | 6.05690e-09 | 1.000000 |
| rad70          | 5.41169e-09 | 1.000000 | 5.41169e-09 | 1.000000 |
| rad2           | 5.12927e-09 | 1.000000 | 5.12928e-09 | 1.000000 |
| rad45          | 2.05863e-09 | 1.000000 | 2.05863e-09 | 1.000000 |
| rad55          | 1.86654e-09 | 1.000000 | 1.86654e-09 | 1.000000 |
| rad62          | 1.48633e-09 | 1.000000 | 1.48633e-09 | 1.000000 |
| rad51          | 1.34865e-09 | 1.000000 | 1.34866e-09 | 1.000000 |
| rad1           | 1.15200e-09 | 1.000000 | 1.15200e-09 | 1.000000 |
| rad34          | 7.91289e-10 | 1.000000 | 7.91289e-10 | 1.000000 |
| rad52          | 6.43952e-10 | 1.000000 | 6.43953e-10 | 1.000000 |
| rad58          | 5.97630e-10 | 1.000000 | 5.97631e-10 | 1.000000 |
| rad61          | 2.31731e-10 | 1.000000 | 2.31731e-10 | 1.000000 |
| rad36          | 2.06747e-10 | 1.000000 | 2.06748e-10 | 1.000000 |
| rad41          | 2.02494e-10 | 1.000000 | 2.02495e-10 | 1.000000 |
| rad19syn       | 1.44428e-10 | 1.000000 | 1.44428e-10 | 1.000000 |
| rad10          | 1.21659e-10 | 1.000000 | 1.21660e-10 | 1.000000 |
| rad26          | 1.15137e-10 | 1.000000 | 1.15137e-10 | 1.000000 |
| rad53          | 1.06423e-10 | 1.000000 | 1.06423e-10 | 1.000000 |
| rad3           | 5.29541e-11 | 1.000000 | 5.29542e-11 | 1.000000 |
| rad56          | 4.69241e-11 | 1.000000 | 4.69242e-11 | 1.000000 |
| rad64          | 4.20158e-11 | 1.000000 | 4.20159e-11 | 1.000000 |
| rad65          | 4.16041e-11 | 1.000000 | 4.16042e-11 | 1.000000 |
| rad4           | 3.97929e-11 | 1.000000 | 3.97930e-11 | 1.000000 |
| rad42          | 3.52850e-11 | 1.000000 | 3.52850e-11 | 1.000000 |
| rad28          | 3.29198e-11 | 1.000000 | 3.29199e-11 | 1.000000 |
| PAH8+H         | 1.19150e-11 | 1.000000 | 1.19151e-11 | 1.000000 |
| rad71          | 1.01270e-11 | 1.000000 | 1.01270e-11 | 1.000000 |
| rad68syn       | 8.71617e-12 | 1.000000 | 8.71617e-12 | 1.000000 |
| rad73          | 8.11342e-12 | 1.000000 | 8.11343e-12 | 1.000000 |
| rad7           | 7.31711e-12 | 1.000000 | 7.31712e-12 | 1.000000 |
| rad22          | 6.90153e-12 | 1.000000 | 6.90154e-12 | 1.000000 |
| rad68anti      | 5.81960e-12 | 1.000000 | 5.81960e-12 | 1.000000 |
| rad40syn       | 3.16548e-12 | 1.000000 | 3.16549e-12 | 1.000000 |
| rad11          | 3.00328e-12 | 1.000000 | 3.00328e-12 | 1.000000 |
| rad40anti      | 2.37546e-12 | 1.000000 | 2.37547e-12 | 1.000000 |
| rad72          | 3.09024e-13 | 1.000000 | 3.09024e-13 | 1.000000 |
| rad31          | 1.51263e-13 | 1.000000 | 1.51263e-13 | 1.000000 |
| rad13          | 1.15630e-13 | 1.000000 | 1.15630e-13 | 1.000000 |
| rad24          | 4.21123e-14 | 1.000000 | 4.21123e-14 | 1.000000 |
| rad21          | 1.93035e-14 | 1.000000 | 1.93035e-14 | 1.000000 |
| rad27          | 8.18774e-15 | 1.000000 | 8.18774e-15 | 1.000000 |
| rad20          | 6.78089e-15 | 1.000000 | 6.78090e-15 | 1.000000 |
| rad14          | 5.25235e-15 | 1.000000 | 5.25236e-15 | 1.000000 |
| rad33          | 4.72021e-15 | 1.000000 | 4.72021e-15 | 1.000000 |
| rad18          | 5.14055e-16 | 1.000000 | 5.14056e-16 | 1.000000 |
| rad25          | 2.27039e-16 | 1.000000 | 2.27038e-16 | 1.000000 |
| rad47          | 1.15553e-16 | 1.000000 | 1.15553e-16 | 1.000000 |
| rad8           | 2.54872e-17 | 1.000000 | 2.54873e-17 | 1.000000 |
| rad5           | 8.48293e-18 | 1.000000 | 8.48294e-18 | 1.000000 |

10.000000 Pa, 900.000000 K

| Rate constant             | True (fraction)       | Effective (fraction)  |
|---------------------------|-----------------------|-----------------------|
| Total                     | 1.49199e-12 (1.00 )   | 1.49199e-12 (1.00 )   |
| Formation of rad19        | 1.30395e-12 (0.874 )  | 1.30394e-12 (0.874 )  |
| H-abstraction to cyc2enyl | 1.56554e-13 (0.105 )  | 1.56554e-13 (0.105 )  |
| H-abstraction to cyclenyl | 3.14892e-14 (0.0211 ) | 3.14890e-14 (0.0211 ) |

  

| species | PYtrue | Cumul | PYeffective | Cumul |
|---------|--------|-------|-------------|-------|
|         |        |       |             |       |

|                               |             |          |             |          |
|-------------------------------|-------------|----------|-------------|----------|
| Indene+H                      | 0.848427    | 0.848427 | 0.848431    | 0.848431 |
| Benzene+cycloprop-2-enylidene | 0.104929    | 0.953356 | 0.104930    | 0.953361 |
| PhCHCCH2+H                    | 0.0224393   | 0.975796 | 0.0224395   | 0.975800 |
| Benzene+cycloprop-1-enylidene | 0.0211054   | 0.996901 | 0.0211054   | 0.996906 |
| C2H2+PhCH2                    | 0.000688676 | 0.997590 | 0.000688680 | 0.997594 |
| Ph+MeAc                       | 0.000648557 | 0.998238 | 0.000648560 | 0.998243 |
| Ph+Allene                     | 0.000479235 | 0.998718 | 0.000479238 | 0.998722 |
| PhCCCH3+H                     | 0.000339165 | 0.999057 | 0.000339166 | 0.999061 |
| PhCCH+CH3                     | 0.000267994 | 0.999325 | 0.000267995 | 0.999329 |
| rad67                         | 0.000210213 | 0.999535 | 0.000210214 | 0.999540 |
| PhCH2CCH+H                    | 0.000199870 | 0.999735 | 0.000199871 | 0.999739 |
| rad9                          | 0.000101342 | 0.999836 | 0.000101343 | 0.999841 |
| rad35                         | 7.65781e-05 | 0.999913 | 7.65785e-05 | 0.999917 |
| PhcycC3H3_A+H                 | 2.44097e-05 | 0.999937 | 2.44098e-05 | 0.999942 |
| PAH7+H                        | 1.89629e-05 | 0.999956 | 1.89630e-05 | 0.999961 |
| PhcycC3H3_B+H                 | 1.23554e-05 | 0.999969 | 1.23555e-05 | 0.999973 |
| rad37                         | 1.15481e-05 | 0.999980 | 1.15480e-05 | 0.999985 |
| Phenyl+cycC3H4                | 5.08007e-06 | 0.999985 | 0.00000     | 0.999985 |
| PAH10+CH3                     | 4.61010e-06 | 0.999990 | 4.61013e-06 | 0.999989 |
| rad39                         | 3.81938e-06 | 0.999994 | 3.81940e-06 | 0.999993 |
| rad30                         | 2.28030e-06 | 0.999996 | 2.28031e-06 | 0.999995 |
| PAH9+H                        | 1.54618e-06 | 0.999997 | 1.54618e-06 | 0.999997 |
| rad38                         | 1.41217e-06 | 0.999999 | 1.41218e-06 | 0.999998 |
| PAH3+H                        | 6.41254e-07 | 0.999999 | 6.41258e-07 | 0.999999 |
| rad46                         | 1.48180e-07 | 1.000000 | 1.48181e-07 | 0.999999 |
| rad60syn                      | 1.06680e-07 | 1.000000 | 1.06680e-07 | 0.999999 |
| rad54                         | 1.03154e-07 | 1.000000 | 1.03155e-07 | 0.999999 |
| rad59                         | 7.56706e-08 | 1.000000 | 7.56710e-08 | 0.999999 |
| rad60anti                     | 6.31448e-08 | 1.000000 | 6.31452e-08 | 0.999999 |
| rad50                         | 4.78912e-08 | 1.000000 | 4.78915e-08 | 1.000000 |
| PAH1+H                        | 4.29827e-08 | 1.000000 | 4.29830e-08 | 1.000000 |
| rad12                         | 4.12301e-08 | 1.000000 | 4.12303e-08 | 1.000000 |
| rad43                         | 2.96825e-08 | 1.000000 | 2.96826e-08 | 1.000000 |
| rad15                         | 2.55616e-08 | 1.000000 | 2.55617e-08 | 1.000000 |
| rad70                         | 1.74417e-08 | 1.000000 | 1.74418e-08 | 1.000000 |
| rad6                          | 1.05687e-08 | 1.000000 | 1.05687e-08 | 1.000000 |
| rad23                         | 8.78868e-09 | 1.000000 | 8.78868e-09 | 1.000000 |
| rad51                         | 7.01164e-09 | 1.000000 | 7.01168e-09 | 1.000000 |
| rad55                         | 5.56338e-09 | 1.000000 | 5.56341e-09 | 1.000000 |
| rad19anti                     | 4.58916e-09 | 1.000000 | 4.58918e-09 | 1.000000 |
| rad2                          | 3.58536e-09 | 1.000000 | 3.58538e-09 | 1.000000 |
| rad62                         | 3.51413e-09 | 1.000000 | 3.51414e-09 | 1.000000 |
| rad52                         | 2.92358e-09 | 1.000000 | 2.92360e-09 | 1.000000 |
| rad34                         | 2.89974e-09 | 1.000000 | 2.89975e-09 | 1.000000 |
| rad58                         | 2.54633e-09 | 1.000000 | 2.54635e-09 | 1.000000 |
| rad45                         | 2.36353e-09 | 1.000000 | 2.36354e-09 | 1.000000 |
| rad61                         | 1.34763e-09 | 1.000000 | 1.34764e-09 | 1.000000 |
| rad1                          | 9.14517e-10 | 1.000000 | 9.14517e-10 | 1.000000 |
| rad41                         | 7.56637e-10 | 1.000000 | 7.56641e-10 | 1.000000 |
| rad53                         | 4.54548e-10 | 1.000000 | 4.54550e-10 | 1.000000 |
| rad56                         | 2.53251e-10 | 1.000000 | 2.53253e-10 | 1.000000 |
| rad36                         | 2.40273e-10 | 1.000000 | 2.40275e-10 | 1.000000 |
| rad65                         | 2.13546e-10 | 1.000000 | 2.13548e-10 | 1.000000 |
| rad64                         | 1.70287e-10 | 1.000000 | 1.70289e-10 | 1.000000 |
| rad19syn                      | 1.51735e-10 | 1.000000 | 1.51736e-10 | 1.000000 |
| PAH8+H                        | 1.29182e-10 | 1.000000 | 1.29182e-10 | 1.000000 |
| rad42                         | 1.08205e-10 | 1.000000 | 1.08206e-10 | 1.000000 |
| rad10                         | 9.23274e-11 | 1.000000 | 9.23282e-11 | 1.000000 |
| rad71                         | 7.68870e-11 | 1.000000 | 7.68874e-11 | 1.000000 |
| rad26                         | 6.66794e-11 | 1.000000 | 6.66797e-11 | 1.000000 |
| rad73                         | 6.18006e-11 | 1.000000 | 6.18009e-11 | 1.000000 |
| rad68syn                      | 5.54353e-11 | 1.000000 | 5.54356e-11 | 1.000000 |
| rad68anti                     | 3.66909e-11 | 1.000000 | 3.66911e-11 | 1.000000 |
| rad3                          | 3.57363e-11 | 1.000000 | 3.57365e-11 | 1.000000 |
| rad4                          | 2.82147e-11 | 1.000000 | 2.82149e-11 | 1.000000 |
| rad40syn                      | 2.67572e-11 | 1.000000 | 2.67574e-11 | 1.000000 |
| rad40anti                     | 2.05342e-11 | 1.000000 | 2.05343e-11 | 1.000000 |
| rad28                         | 1.21557e-11 | 1.000000 | 1.21558e-11 | 1.000000 |
| rad22                         | 7.39908e-12 | 1.000000 | 7.39912e-12 | 1.000000 |
| rad7                          | 3.95465e-12 | 1.000000 | 3.95466e-12 | 1.000000 |
| rad72                         | 2.26718e-12 | 1.000000 | 2.26720e-12 | 1.000000 |
| rad11                         | 2.02343e-12 | 1.000000 | 2.02344e-12 | 1.000000 |
| rad21                         | 1.37473e-12 | 1.000000 | 1.37473e-12 | 1.000000 |
| rad24                         | 8.16509e-13 | 1.000000 | 8.16514e-13 | 1.000000 |
| rad20                         | 3.85164e-13 | 1.000000 | 3.85167e-13 | 1.000000 |
| rad13                         | 2.02809e-13 | 1.000000 | 2.02810e-13 | 1.000000 |
| rad31                         | 1.88717e-13 | 1.000000 | 1.88719e-13 | 1.000000 |
| rad33                         | 1.75435e-13 | 1.000000 | 1.75435e-13 | 1.000000 |
| rad8                          | 5.65900e-14 | 1.000000 | 5.65903e-14 | 1.000000 |

|       |             |         |             |          |
|-------|-------------|---------|-------------|----------|
| rad18 | 2.24054e-14 | 1.00000 | 2.24055e-14 | 1.000000 |
| rad27 | 1.39819e-14 | 1.00000 | 1.39819e-14 | 1.000000 |
| rad14 | 6.22208e-15 | 1.00000 | 6.22211e-15 | 1.000000 |
| rad25 | 3.22741e-15 | 1.00000 | 3.22743e-15 | 1.000000 |
| rad47 | 6.65039e-16 | 1.00000 | 6.65042e-16 | 1.000000 |
| rad5  | 7.06921e-18 | 1.00000 | 7.06925e-18 | 1.000000 |

10.000000 Pa, 1000.00000 K

=====

| Rate constant             | True (fraction)       | Effective (fraction)  |
|---------------------------|-----------------------|-----------------------|
| Total                     | 2.07591e-12 (1.00 )   | 2.07587e-12 (1.00 )   |
| Formation of rad19        | 1.74189e-12 (0.839 )  | 1.74186e-12 (0.839 )  |
| H-abstraction to cyc2enyl | 2.68753e-13 (0.129 )  | 2.68753e-13 (0.129 )  |
| H-abstraction to cyclenyl | 6.52627e-14 (0.0314 ) | 6.52614e-14 (0.0314 ) |

| species                       | PYtrue      | Cumul    | PYeffective | Cumul    |
|-------------------------------|-------------|----------|-------------|----------|
| Indene+H                      | 0.799236    | 0.799236 | 0.799250    | 0.799250 |
| Benzene+cycloprop-2-enylidene | 0.129463    | 0.928699 | 0.129465    | 0.928715 |
| PhCHCCH2+H                    | 0.0347910   | 0.963490 | 0.0347916   | 0.963507 |
| Benzene+cycloprop-1-enylidene | 0.0314382   | 0.994928 | 0.0314381   | 0.994945 |
| C2H2+PhCH2                    | 0.00107760  | 0.996006 | 0.00107762  | 0.996022 |
| Ph+MeAc                       | 0.00106147  | 0.997067 | 0.00106149  | 0.997084 |
| Ph+Allene                     | 0.000864104 | 0.997931 | 0.000864118 | 0.997948 |
| PhCCCH3+H                     | 0.000521251 | 0.998452 | 0.000521261 | 0.998469 |
| PhCH2CCH+H                    | 0.000393394 | 0.998846 | 0.000393401 | 0.998863 |
| PhCCH+CH3                     | 0.000375241 | 0.999221 | 0.000375247 | 0.999238 |
| rad67                         | 0.000355305 | 0.999576 | 0.000355310 | 0.999593 |
| rad35                         | 0.000128644 | 0.999705 | 0.000128646 | 0.999722 |
| rad9                          | 8.77689e-05 | 0.999793 | 8.77703e-05 | 0.999809 |
| PhcycC3H3_A+H                 | 6.73846e-05 | 0.999860 | 6.73857e-05 | 0.999877 |
| PhcycC3H3_B+H                 | 3.99786e-05 | 0.999900 | 3.99793e-05 | 0.999917 |
| PAH7+H                        | 3.03953e-05 | 0.999931 | 3.03958e-05 | 0.999947 |
| rad37                         | 2.14848e-05 | 0.999952 | 2.14852e-05 | 0.999969 |
| Phenyl+cycC3H4                | 1.68080e-05 | 0.999969 | 0.000000    | 0.999969 |
| PAH10+CH3                     | 1.17024e-05 | 0.999981 | 1.17025e-05 | 0.999980 |
| rad39                         | 5.84097e-06 | 0.999986 | 5.84108e-06 | 0.999986 |
| rad30                         | 4.09445e-06 | 0.999990 | 4.09452e-06 | 0.999990 |
| PAH9+H                        | 3.42017e-06 | 0.999994 | 3.42022e-06 | 0.999994 |
| rad38                         | 3.18234e-06 | 0.999997 | 3.18240e-06 | 0.999997 |
| PAH3+H                        | 1.62798e-06 | 0.999999 | 1.62801e-06 | 0.999999 |
| rad46                         | 3.62874e-07 | 0.999999 | 3.62881e-07 | 0.999999 |
| rad54                         | 2.33149e-07 | 0.999999 | 2.33152e-07 | 0.999999 |
| rad60syn                      | 2.29342e-07 | 1.000000 | 2.29347e-07 | 0.999999 |
| rad59                         | 1.84194e-07 | 1.000000 | 1.84198e-07 | 1.000000 |
| rad50                         | 1.47540e-07 | 1.000000 | 1.47542e-07 | 1.000000 |
| rad60anti                     | 1.37406e-07 | 1.000000 | 1.37408e-07 | 1.000000 |
| PAH1+H                        | 1.24244e-07 | 1.000000 | 1.24246e-07 | 1.000000 |
| rad12                         | 7.32294e-08 | 1.000000 | 7.32307e-08 | 1.000000 |
| rad43                         | 6.80940e-08 | 1.000000 | 6.80952e-08 | 1.000000 |
| rad70                         | 4.53544e-08 | 1.000000 | 4.53552e-08 | 1.000000 |
| rad15                         | 2.60429e-08 | 1.000000 | 2.60435e-08 | 1.000000 |
| rad51                         | 2.50117e-08 | 1.000000 | 2.50121e-08 | 1.000000 |
| rad55                         | 1.34648e-08 | 1.000000 | 1.34651e-08 | 1.000000 |
| rad52                         | 9.74219e-09 | 1.000000 | 9.74233e-09 | 1.000000 |
| rad34                         | 8.26081e-09 | 1.000000 | 8.26096e-09 | 1.000000 |
| rad23                         | 8.22334e-09 | 1.000000 | 8.22348e-09 | 1.000000 |
| rad58                         | 8.06389e-09 | 1.000000 | 8.06404e-09 | 1.000000 |
| rad62                         | 7.16838e-09 | 1.000000 | 7.16850e-09 | 1.000000 |
| rad6                          | 5.10464e-09 | 1.000000 | 5.10473e-09 | 1.000000 |
| rad61                         | 4.97458e-09 | 1.000000 | 4.97467e-09 | 1.000000 |
| rad19anti                     | 3.42901e-09 | 1.000000 | 3.42907e-09 | 1.000000 |
| rad2                          | 2.58663e-09 | 1.000000 | 2.58667e-09 | 1.000000 |
| rad45                         | 2.53282e-09 | 1.000000 | 2.53286e-09 | 1.000000 |
| rad41                         | 2.19585e-09 | 1.000000 | 2.19589e-09 | 1.000000 |
| rad53                         | 1.42032e-09 | 1.000000 | 1.42034e-09 | 1.000000 |
| rad56                         | 9.03046e-10 | 1.000000 | 9.03061e-10 | 1.000000 |
| rad65                         | 7.55914e-10 | 1.000000 | 7.55927e-10 | 1.000000 |
| rad1                          | 7.03291e-10 | 1.000000 | 7.03303e-10 | 1.000000 |
| PAH8+H                        | 5.61381e-10 | 1.000000 | 5.61390e-10 | 1.000000 |
| rad64                         | 5.12753e-10 | 1.000000 | 5.12763e-10 | 1.000000 |
| rad71                         | 3.10628e-10 | 1.000000 | 3.10634e-10 | 1.000000 |
| rad42                         | 2.70390e-10 | 1.000000 | 2.70395e-10 | 1.000000 |
| rad36                         | 2.53870e-10 | 1.000000 | 2.53875e-10 | 1.000000 |
| rad73                         | 2.50579e-10 | 1.000000 | 2.50584e-10 | 1.000000 |
| rad68syn                      | 2.11219e-10 | 1.000000 | 2.11222e-10 | 1.000000 |
| rad19syn                      | 1.42443e-10 | 1.000000 | 1.42446e-10 | 1.000000 |
| rad68anti                     | 1.39341e-10 | 1.000000 | 1.39344e-10 | 1.000000 |
| rad40syn                      | 1.10939e-10 | 1.000000 | 1.10941e-10 | 1.000000 |

|           |             |         |             |         |
|-----------|-------------|---------|-------------|---------|
| rad10     | 8.59631e-11 | 1.00000 | 8.59646e-11 | 1.00000 |
| rad40anti | 8.55243e-11 | 1.00000 | 8.55258e-11 | 1.00000 |
| rad26     | 4.05965e-11 | 1.00000 | 4.05973e-11 | 1.00000 |
| rad3      | 2.50029e-11 | 1.00000 | 2.50033e-11 | 1.00000 |
| rad21     | 2.22164e-11 | 1.00000 | 2.22168e-11 | 1.00000 |
| rad4      | 2.00773e-11 | 1.00000 | 2.00777e-11 | 1.00000 |
| rad22     | 1.39928e-11 | 1.00000 | 1.39931e-11 | 1.00000 |
| rad72     | 9.19711e-12 | 1.00000 | 9.19734e-12 | 1.00000 |
| rad8      | 6.39453e-12 | 1.00000 | 6.39464e-12 | 1.00000 |
| rad20     | 6.30724e-12 | 1.00000 | 6.30735e-12 | 1.00000 |
| rad28     | 5.71627e-12 | 1.00000 | 5.71637e-12 | 1.00000 |
| rad24     | 3.62172e-12 | 1.00000 | 3.62178e-12 | 1.00000 |
| rad7      | 3.22946e-12 | 1.00000 | 3.22951e-12 | 1.00000 |
| rad13     | 2.86856e-12 | 1.00000 | 2.86861e-12 | 1.00000 |
| rad11     | 2.55122e-12 | 1.00000 | 2.55126e-12 | 1.00000 |
| rad33     | 2.35017e-12 | 1.00000 | 2.35021e-12 | 1.00000 |
| rad18     | 3.15901e-13 | 1.00000 | 3.15906e-13 | 1.00000 |
| rad31     | 2.18808e-13 | 1.00000 | 2.18812e-13 | 1.00000 |
| rad25     | 8.43210e-14 | 1.00000 | 8.43225e-14 | 1.00000 |
| rad27     | 7.61266e-14 | 1.00000 | 7.61280e-14 | 1.00000 |
| rad14     | 1.18809e-14 | 1.00000 | 1.18811e-14 | 1.00000 |
| rad47     | 2.40836e-15 | 1.00000 | 2.40841e-15 | 1.00000 |
| rad5      | 7.25811e-18 | 1.00000 | 7.25824e-18 | 1.00000 |

10.0000000 Pa, 1100.00000 K

=====

| Rate constant             | True (fraction)       | Effective (fraction)  |
|---------------------------|-----------------------|-----------------------|
| Total                     | 2.81236e-12 (1.00 )   | 2.81222e-12 (1.00 )   |
| Formation of rad19        | 2.25993e-12 (0.804 )  | 2.25980e-12 (0.804 )  |
| H-abstraction to cyc2enyl | 4.30538e-13 (0.153 )  | 4.30538e-13 (0.153 )  |
| H-abstraction to cyclenyl | 1.21896e-13 (0.0433 ) | 1.21889e-13 (0.0433 ) |

| species                       | PYtrue      | Cumul    | PYeffective | Cumul    |
|-------------------------------|-------------|----------|-------------|----------|
| Indene+H                      | 0.745171    | 0.745171 | 0.745208    | 0.745208 |
| Benzene+cycloprop-2-enylidene | 0.153088    | 0.898258 | 0.153095    | 0.898304 |
| PhCHCCH2+H                    | 0.0505968   | 0.948855 | 0.0505993   | 0.948903 |
| Benzene+cycloprop-1-enylidene | 0.0433429   | 0.992198 | 0.0433425   | 0.992245 |
| Ph+MeAc                       | 0.00160680  | 0.993805 | 0.00160688  | 0.993852 |
| C2H2+PhCH2                    | 0.00158052  | 0.995386 | 0.00158059  | 0.995433 |
| Ph+Allene                     | 0.00140079  | 0.996786 | 0.00140086  | 0.996834 |
| PhCCCH3+H                     | 0.000748543 | 0.997535 | 0.000748580 | 0.997582 |
| PhCH2CCH+H                    | 0.000691050 | 0.998226 | 0.000691084 | 0.998273 |
| rad67                         | 0.000554322 | 0.998780 | 0.000554350 | 0.998828 |
| PhCCH+CH3                     | 0.000501559 | 0.999282 | 0.000501583 | 0.999329 |
| rad35                         | 0.000199923 | 0.999482 | 0.000199933 | 0.999529 |
| PhcycC3H3_A+H                 | 0.000161541 | 0.999643 | 0.000161549 | 0.999691 |
| PhcycC3H3_B+H                 | 0.000109192 | 0.999752 | 0.000109198 | 0.999800 |
| rad9                          | 5.90673e-05 | 0.999812 | 5.90703e-05 | 0.999859 |
| Phenyl+cycC3H4                | 4.74537e-05 | 0.999859 | 0.00000     | 0.999859 |
| PAH7+H                        | 4.45938e-05 | 0.999904 | 4.45960e-05 | 0.999904 |
| rad37                         | 3.59990e-05 | 0.999940 | 3.60008e-05 | 0.999940 |
| PAH10+CH3                     | 2.52429e-05 | 0.999965 | 2.52442e-05 | 0.999965 |
| rad39                         | 8.18210e-06 | 0.999973 | 8.18251e-06 | 0.999973 |
| PAH9+H                        | 6.75806e-06 | 0.999980 | 6.75840e-06 | 0.999980 |
| rad30                         | 6.75202e-06 | 0.999987 | 6.75236e-06 | 0.999987 |
| rad38                         | 6.30773e-06 | 0.999993 | 6.30804e-06 | 0.999993 |
| PAH3+H                        | 3.54364e-06 | 0.999996 | 3.54382e-06 | 0.999997 |
| rad46                         | 7.75166e-07 | 0.999997 | 7.75205e-07 | 0.999997 |
| rad54                         | 4.53224e-07 | 0.999998 | 4.53246e-07 | 0.999998 |
| rad60syn                      | 4.38941e-07 | 0.999998 | 4.38963e-07 | 0.999998 |
| rad59                         | 3.88143e-07 | 0.999998 | 3.88162e-07 | 0.999999 |
| rad50                         | 3.67118e-07 | 0.999999 | 3.67136e-07 | 0.999999 |
| PAH1+H                        | 2.95013e-07 | 0.999999 | 2.95028e-07 | 0.999999 |
| rad60anti                     | 2.65531e-07 | 0.999999 | 2.65545e-07 | 1.000000 |
| rad43                         | 1.36334e-07 | 0.999999 | 1.36341e-07 | 1.000000 |
| rad70                         | 9.93879e-08 | 1.000000 | 9.93934e-08 | 1.000000 |
| rad12                         | 7.95606e-08 | 1.000000 | 7.95646e-08 | 1.000000 |
| rad51                         | 6.63774e-08 | 1.000000 | 6.63807e-08 | 1.000000 |
| rad55                         | 2.76555e-08 | 1.000000 | 2.76569e-08 | 1.000000 |
| rad15                         | 2.66169e-08 | 1.000000 | 2.66182e-08 | 1.000000 |
| rad52                         | 2.52447e-08 | 1.000000 | 2.52459e-08 | 1.000000 |
| rad58                         | 2.03348e-08 | 1.000000 | 2.03358e-08 | 1.000000 |
| rad34                         | 1.93626e-08 | 1.000000 | 1.93635e-08 | 1.000000 |
| rad61                         | 1.38105e-08 | 1.000000 | 1.38112e-08 | 1.000000 |
| rad62                         | 1.29403e-08 | 1.000000 | 1.29409e-08 | 1.000000 |
| rad23                         | 7.59053e-09 | 1.000000 | 7.59091e-09 | 1.000000 |
| rad41                         | 5.23538e-09 | 1.000000 | 5.23564e-09 | 1.000000 |
| rad53                         | 3.55052e-09 | 1.000000 | 3.55069e-09 | 1.000000 |

|           |             |          |             |          |
|-----------|-------------|----------|-------------|----------|
| rad6      | 3.37293e-09 | 1.000000 | 3.37310e-09 | 1.000000 |
| rad19anti | 2.56845e-09 | 1.000000 | 2.56858e-09 | 1.000000 |
| rad45     | 2.55435e-09 | 1.000000 | 2.55448e-09 | 1.000000 |
| rad56     | 2.46744e-09 | 1.000000 | 2.46757e-09 | 1.000000 |
| rad65     | 2.00794e-09 | 1.000000 | 2.00805e-09 | 1.000000 |
| rad2      | 1.93043e-09 | 1.000000 | 1.93053e-09 | 1.000000 |
| PAH8+H    | 1.55597e-09 | 1.000000 | 1.55604e-09 | 1.000000 |
| rad64     | 1.23821e-09 | 1.000000 | 1.23827e-09 | 1.000000 |
| rad71     | 6.24659e-10 | 1.000000 | 6.24690e-10 | 1.000000 |
| rad68syn  | 5.86721e-10 | 1.000000 | 5.86751e-10 | 1.000000 |
| rad42     | 5.73478e-10 | 1.000000 | 5.73506e-10 | 1.000000 |
| rad73     | 5.63346e-10 | 1.000000 | 5.63375e-10 | 1.000000 |
| rad1      | 5.33381e-10 | 1.000000 | 5.33408e-10 | 1.000000 |
| rad68anti | 3.86584e-10 | 1.000000 | 3.86603e-10 | 1.000000 |
| rad40syn  | 3.12993e-10 | 1.000000 | 3.13009e-10 | 1.000000 |
| rad36     | 2.54057e-10 | 1.000000 | 2.54069e-10 | 1.000000 |
| rad40anti | 2.40801e-10 | 1.000000 | 2.40812e-10 | 1.000000 |
| rad19syn  | 1.28391e-10 | 1.000000 | 1.28398e-10 | 1.000000 |
| rad21     | 9.89347e-11 | 1.000000 | 9.89394e-11 | 1.000000 |
| rad10     | 9.51924e-11 | 1.000000 | 9.51972e-11 | 1.000000 |
| rad8      | 7.72777e-11 | 1.000000 | 7.72816e-11 | 1.000000 |
| rad13     | 3.47083e-11 | 1.000000 | 3.47100e-11 | 1.000000 |
| rad22     | 3.17067e-11 | 1.000000 | 3.17082e-11 | 1.000000 |
| rad20     | 2.84448e-11 | 1.000000 | 2.84463e-11 | 1.000000 |
| rad26     | 2.81850e-11 | 1.000000 | 2.81864e-11 | 1.000000 |
| rad3      | 1.76658e-11 | 1.000000 | 1.76666e-11 | 1.000000 |
| rad11     | 1.51310e-11 | 1.000000 | 1.51317e-11 | 1.000000 |
| rad72     | 1.49574e-11 | 1.000000 | 1.49581e-11 | 1.000000 |
| rad4      | 1.42202e-11 | 1.000000 | 1.42210e-11 | 1.000000 |
| rad33     | 8.74308e-12 | 1.000000 | 8.74348e-12 | 1.000000 |
| rad24     | 7.73570e-12 | 1.000000 | 7.73609e-12 | 1.000000 |
| rad7      | 4.72819e-12 | 1.000000 | 4.72843e-12 | 1.000000 |
| rad28     | 3.67410e-12 | 1.000000 | 3.67429e-12 | 1.000000 |
| rad18     | 1.43688e-12 | 1.000000 | 1.43695e-12 | 1.000000 |
| rad25     | 8.26543e-13 | 1.000000 | 8.26584e-13 | 1.000000 |
| rad27     | 5.13509e-13 | 1.000000 | 5.13534e-13 | 1.000000 |
| rad31     | 2.41221e-13 | 1.000000 | 2.41233e-13 | 1.000000 |
| rad14     | 4.91164e-14 | 1.000000 | 4.91189e-14 | 1.000000 |
| rad47     | 6.13643e-15 | 1.000000 | 6.13674e-15 | 1.000000 |
| rad5      | 1.05937e-17 | 1.000000 | 1.05942e-17 | 1.000000 |

10.000000 Pa, 1200.00000 K

| Rate constant             | True (fraction)       | Effective (fraction)  |
|---------------------------|-----------------------|-----------------------|
| Total                     | 3.72623e-12 (1.00 )   | 3.72576e-12 (1.00 )   |
| Formation of rad19        | 2.86288e-12 (0.768 )  | 2.86245e-12 (0.768 )  |
| H-abstraction to cyc2enyl | 6.53266e-13 (0.175 )  | 6.53266e-13 (0.175 )  |
| H-abstraction to cyclenyl | 2.10085e-13 (0.0564 ) | 2.10053e-13 (0.0564 ) |

| species                       | PYtrue      | Cumul    | PYeffective | Cumul    |
|-------------------------------|-------------|----------|-------------|----------|
| Indene+H                      | 0.687323    | 0.687323 | 0.687410    | 0.687410 |
| Benzene+cycloprop-2-enylidene | 0.175315    | 0.862638 | 0.175337    | 0.862747 |
| PhCHCCH2+H                    | 0.0695675   | 0.932206 | 0.0695763   | 0.932324 |
| Benzene+cycloprop-1-enylidene | 0.0563801   | 0.988586 | 0.0563786   | 0.988702 |
| Ph+MeAc                       | 0.00227719  | 0.990863 | 0.00227748  | 0.990980 |
| C2H2+PhCH2                    | 0.00219548  | 0.993059 | 0.00219576  | 0.993175 |
| Ph+Allene                     | 0.00208450  | 0.995143 | 0.00208476  | 0.995260 |
| PhCH2CCH+H                    | 0.00111086  | 0.996254 | 0.00111100  | 0.996371 |
| PhCCCH3+H                     | 0.00101349  | 0.997267 | 0.00101362  | 0.997385 |
| rad67                         | 0.000808157 | 0.998076 | 0.000808258 | 0.998193 |
| PhCCH+CH3                     | 0.000646786 | 0.998722 | 0.000646868 | 0.998840 |
| PhcycC3H3_A+H                 | 0.000346014 | 0.999068 | 0.000346057 | 0.999186 |
| rad35                         | 0.000290842 | 0.999359 | 0.000290879 | 0.999477 |
| PhcycC3H3_B+H                 | 0.000261748 | 0.999621 | 0.000261781 | 0.999739 |
| Phenyl+cycC3H4                | 0.000117514 | 0.999738 | 0.000000    | 0.999739 |
| PAH7+H                        | 6.10198e-05 | 0.999800 | 6.10275e-05 | 0.999800 |
| rad37                         | 5.52307e-05 | 0.999855 | 5.52377e-05 | 0.999855 |
| PAH10+CH3                     | 4.84398e-05 | 0.999903 | 4.84458e-05 | 0.999903 |
| rad9                          | 3.82901e-05 | 0.999941 | 3.82949e-05 | 0.999942 |
| PAH9+H                        | 1.23241e-05 | 0.999954 | 1.23257e-05 | 0.999954 |
| rad38                         | 1.13686e-05 | 0.999965 | 1.13700e-05 | 0.999965 |
| rad39                         | 1.07159e-05 | 0.999976 | 1.07173e-05 | 0.999976 |
| rad30                         | 1.03710e-05 | 0.999986 | 1.03722e-05 | 0.999986 |
| PAH3+H                        | 6.98307e-06 | 0.999993 | 6.98395e-06 | 0.999993 |
| rad46                         | 1.51822e-06 | 0.999995 | 1.51841e-06 | 0.999995 |
| rad50                         | 8.39719e-07 | 0.999996 | 8.39827e-07 | 0.999996 |
| rad54                         | 7.84508e-07 | 0.999996 | 7.84602e-07 | 0.999996 |
| rad60syn                      | 7.69572e-07 | 0.999997 | 7.69675e-07 | 0.999997 |



|           |             |          |             |          |
|-----------|-------------|----------|-------------|----------|
| rad59     | 7.41303e-07 | 0.999998 | 7.41397e-07 | 0.999998 |
| PAH1+H    | 6.22633e-07 | 0.999999 | 6.22712e-07 | 0.999999 |
| rad60anti | 4.69547e-07 | 0.999999 | 4.69606e-07 | 0.999999 |
| rad43     | 2.47081e-07 | 0.999999 | 2.47112e-07 | 0.999999 |
| rad70     | 1.94256e-07 | 0.999999 | 1.94280e-07 | 1.000000 |
| rad51     | 1.67009e-07 | 1.000000 | 1.67030e-07 | 1.000000 |
| rad12     | 7.14515e-08 | 1.000000 | 7.14605e-08 | 1.000000 |
| rad52     | 6.07068e-08 | 1.000000 | 6.07144e-08 | 1.000000 |
| rad55     | 5.02375e-08 | 1.000000 | 5.02439e-08 | 1.000000 |
| rad58     | 4.61936e-08 | 1.000000 | 4.61993e-08 | 1.000000 |
| rad34     | 4.03246e-08 | 1.000000 | 4.03296e-08 | 1.000000 |
| rad61     | 3.40977e-08 | 1.000000 | 3.41020e-08 | 1.000000 |
| rad15     | 3.01816e-08 | 1.000000 | 3.01854e-08 | 1.000000 |
| rad62     | 2.12837e-08 | 1.000000 | 2.12863e-08 | 1.000000 |
| rad41     | 1.11314e-08 | 1.000000 | 1.11327e-08 | 1.000000 |
| rad53     | 7.73491e-09 | 1.000000 | 7.73593e-09 | 1.000000 |
| rad23     | 7.00175e-09 | 1.000000 | 7.00263e-09 | 1.000000 |
| rad56     | 5.89042e-09 | 1.000000 | 5.89116e-09 | 1.000000 |
| rad65     | 5.01607e-09 | 1.000000 | 5.01670e-09 | 1.000000 |
| PAH8+H    | 4.32174e-09 | 1.000000 | 4.32228e-09 | 1.000000 |
| rad6      | 3.28833e-09 | 1.000000 | 3.28874e-09 | 1.000000 |
| rad64     | 2.63381e-09 | 1.000000 | 2.63414e-09 | 1.000000 |
| rad45     | 2.46981e-09 | 1.000000 | 2.47012e-09 | 1.000000 |
| rad19anti | 1.94211e-09 | 1.000000 | 1.94235e-09 | 1.000000 |
| rad71     | 1.58650e-09 | 1.000000 | 1.58671e-09 | 1.000000 |
| rad73     | 1.51366e-09 | 1.000000 | 1.51385e-09 | 1.000000 |
| rad68syn  | 1.48200e-09 | 1.000000 | 1.48219e-09 | 1.000000 |
| rad2      | 1.43906e-09 | 1.000000 | 1.43924e-09 | 1.000000 |
| rad42     | 1.08840e-09 | 1.000000 | 1.08853e-09 | 1.000000 |
| rad68anti | 9.74303e-10 | 1.000000 | 9.74430e-10 | 1.000000 |
| rad40syn  | 8.41263e-10 | 1.000000 | 8.41371e-10 | 1.000000 |
| rad40anti | 6.50096e-10 | 1.000000 | 6.50177e-10 | 1.000000 |
| rad1      | 4.00199e-10 | 1.000000 | 4.00249e-10 | 1.000000 |
| rad8      | 2.54904e-10 | 1.000000 | 2.54936e-10 | 1.000000 |
| rad36     | 2.45706e-10 | 1.000000 | 2.45737e-10 | 1.000000 |
| rad21     | 2.09349e-10 | 1.000000 | 2.09375e-10 | 1.000000 |
| rad11     | 1.55873e-10 | 1.000000 | 1.55893e-10 | 1.000000 |
| rad13     | 1.32733e-10 | 1.000000 | 1.32750e-10 | 1.000000 |
| rad10     | 1.14718e-10 | 1.000000 | 1.14732e-10 | 1.000000 |
| rad19syn  | 1.13955e-10 | 1.000000 | 1.13970e-10 | 1.000000 |
| rad20     | 5.73712e-11 | 1.000000 | 5.73785e-11 | 1.000000 |
| rad22     | 5.38622e-11 | 1.000000 | 5.38689e-11 | 1.000000 |
| rad72     | 3.01709e-11 | 1.000000 | 3.01747e-11 | 1.000000 |
| rad26     | 2.25638e-11 | 1.000000 | 2.25667e-11 | 1.000000 |
| rad7      | 2.08049e-11 | 1.000000 | 2.08075e-11 | 1.000000 |
| rad33     | 1.50159e-11 | 1.000000 | 1.50178e-11 | 1.000000 |
| rad3      | 1.24531e-11 | 1.000000 | 1.24547e-11 | 1.000000 |
| rad24     | 1.18623e-11 | 1.000000 | 1.18638e-11 | 1.000000 |
| rad4      | 1.00069e-11 | 1.000000 | 1.00081e-11 | 1.000000 |
| rad18     | 4.86713e-12 | 1.000000 | 4.86775e-12 | 1.000000 |
| rad28     | 3.37731e-12 | 1.000000 | 3.37774e-12 | 1.000000 |
| rad25     | 3.00585e-12 | 1.000000 | 3.00623e-12 | 1.000000 |
| rad27     | 1.58271e-12 | 1.000000 | 1.58291e-12 | 1.000000 |
| rad31     | 2.55802e-13 | 1.000000 | 2.55834e-13 | 1.000000 |
| rad14     | 1.48254e-13 | 1.000000 | 1.48273e-13 | 1.000000 |
| rad47     | 1.50058e-14 | 1.000000 | 1.50077e-14 | 1.000000 |
| rad5      | 3.15895e-17 | 1.000000 | 3.15935e-17 | 1.000000 |

10.000000 Pa, 1300.00000 K

| Rate constant             | True (fraction)       | Effective (fraction)  |
|---------------------------|-----------------------|-----------------------|
| Total                     | 4.84401e-12 (1.00 )   | 4.84262e-12 (1.00 )   |
| Formation of rad19        | 3.55537e-12 (0.734 )  | 3.55411e-12 (0.734 )  |
| H-abstraction to cyc2enyl | 9.48893e-13 (0.196 )  | 9.48893e-13 (0.196 )  |
| H-abstraction to cyclenyl | 3.39740e-13 (0.0701 ) | 3.39620e-13 (0.0701 ) |

| species                       | PYtrue      | Cumul    | PYeffective | Cumul    |
|-------------------------------|-------------|----------|-------------|----------|
| Indene+H                      | 0.627056    | 0.627056 | 0.627235    | 0.627235 |
| Benzene+cycloprop-2-enylidene | 0.195890    | 0.822947 | 0.195946    | 0.823181 |
| PhCHCCH2+H                    | 0.0909445   | 0.913891 | 0.0909704   | 0.914152 |
| Benzene+cycloprop-1-enylidene | 0.0701362   | 0.984027 | 0.0701313   | 0.984283 |
| Ph+MeAc                       | 0.00304690  | 0.987074 | 0.00304778  | 0.987331 |
| C2H2+PhCH2                    | 0.00290612  | 0.989980 | 0.00290696  | 0.990238 |
| Ph+Allene                     | 0.00288725  | 0.992868 | 0.00288808  | 0.993126 |
| PhCH2CCH+H                    | 0.00165682  | 0.994524 | 0.00165729  | 0.994783 |
| PhCCCH3+H                     | 0.00130233  | 0.995827 | 0.00130271  | 0.996086 |
| rad67                         | 0.00110989  | 0.996937 | 0.00111020  | 0.997196 |
| PhCCH+CH3                     | 0.000810123 | 0.997747 | 0.000810353 | 0.998006 |

|                |             |          |             |          |
|----------------|-------------|----------|-------------|----------|
| PhcycC3H3_A+H  | 0.000673661 | 0.998420 | 0.000673853 | 0.998680 |
| PhcycC3H3_B+H  | 0.000561705 | 0.998982 | 0.000561865 | 0.999242 |
| rad35          | 0.000399108 | 0.999381 | 0.000399222 | 0.999641 |
| Phenyl+cycC3H4 | 0.000260507 | 0.999642 | 0.000000    | 0.999641 |
| PAH10+CH3      | 8.40114e-05 | 0.999726 | 8.40349e-05 | 0.999725 |
| PAH7+H         | 7.89697e-05 | 0.999805 | 7.89921e-05 | 0.999804 |
| rad37          | 7.84302e-05 | 0.999883 | 7.84527e-05 | 0.999883 |
| rad9           | 2.42874e-05 | 0.999907 | 2.42943e-05 | 0.999907 |
| PAH9+H         | 2.09112e-05 | 0.999928 | 2.09172e-05 | 0.999928 |
| rad38          | 1.88619e-05 | 0.999947 | 1.88673e-05 | 0.999947 |
| rad30          | 1.49548e-05 | 0.999962 | 1.49590e-05 | 0.999962 |
| rad39          | 1.33474e-05 | 0.999975 | 1.33512e-05 | 0.999975 |
| PAH3+H         | 1.26174e-05 | 0.999988 | 1.26210e-05 | 0.999988 |
| rad46          | 2.75021e-06 | 0.999991 | 2.75099e-06 | 0.999991 |
| rad50          | 1.76960e-06 | 0.999993 | 1.77010e-06 | 0.999992 |
| rad59          | 1.29981e-06 | 0.999994 | 1.30018e-06 | 0.999994 |
| rad60syn       | 1.24969e-06 | 0.999995 | 1.25005e-06 | 0.999995 |
| rad54          | 1.23235e-06 | 0.999996 | 1.23270e-06 | 0.999996 |
| PAH1+H         | 1.18637e-06 | 0.999998 | 1.18671e-06 | 0.999997 |
| rad60anti      | 7.68360e-07 | 0.999998 | 7.68578e-07 | 0.999998 |
| rad43          | 4.10955e-07 | 0.999999 | 4.11072e-07 | 0.999999 |
| rad51          | 3.91634e-07 | 0.999999 | 3.91746e-07 | 0.999999 |
| rad70          | 3.44720e-07 | 0.999999 | 3.44819e-07 | 0.999999 |
| rad52          | 1.34800e-07 | 1.000000 | 1.34838e-07 | 0.999999 |
| rad58          | 9.54048e-08 | 1.000000 | 9.54320e-08 | 0.999999 |
| rad55          | 8.23606e-08 | 1.000000 | 8.23835e-08 | 1.000000 |
| rad34          | 7.59178e-08 | 1.000000 | 7.59390e-08 | 1.000000 |
| rad61          | 7.49923e-08 | 1.000000 | 7.50135e-08 | 1.000000 |
| rad12          | 5.90401e-08 | 1.000000 | 5.90569e-08 | 1.000000 |
| rad15          | 3.88378e-08 | 1.000000 | 3.88489e-08 | 1.000000 |
| rad62          | 3.24090e-08 | 1.000000 | 3.24182e-08 | 1.000000 |
| rad41          | 2.14109e-08 | 1.000000 | 2.14170e-08 | 1.000000 |
| rad53          | 1.49729e-08 | 1.000000 | 1.49772e-08 | 1.000000 |
| rad56          | 1.24374e-08 | 1.000000 | 1.24410e-08 | 1.000000 |
| rad65          | 1.16209e-08 | 1.000000 | 1.16242e-08 | 1.000000 |
| PAH8+H         | 1.13433e-08 | 1.000000 | 1.13466e-08 | 1.000000 |
| rad23          | 6.62287e-09 | 1.000000 | 6.62476e-09 | 1.000000 |
| rad64          | 5.04745e-09 | 1.000000 | 5.04889e-09 | 1.000000 |
| rad71          | 4.94543e-09 | 1.000000 | 4.94684e-09 | 1.000000 |
| rad73          | 4.49226e-09 | 1.000000 | 4.49354e-09 | 1.000000 |
| rad6           | 4.08023e-09 | 1.000000 | 4.08139e-09 | 1.000000 |
| rad68syn       | 3.38737e-09 | 1.000000 | 3.38834e-09 | 1.000000 |
| rad45          | 2.32001e-09 | 1.000000 | 2.32067e-09 | 1.000000 |
| rad68anti      | 2.22123e-09 | 1.000000 | 2.22187e-09 | 1.000000 |
| rad40syn       | 2.08475e-09 | 1.000000 | 2.08535e-09 | 1.000000 |
| rad42          | 1.88457e-09 | 1.000000 | 1.88511e-09 | 1.000000 |
| rad40anti      | 1.62326e-09 | 1.000000 | 1.62372e-09 | 1.000000 |
| rad19anti      | 1.48684e-09 | 1.000000 | 1.48726e-09 | 1.000000 |
| rad2           | 1.06695e-09 | 1.000000 | 1.06725e-09 | 1.000000 |
| rad11          | 7.45732e-10 | 1.000000 | 7.45944e-10 | 1.000000 |
| rad8           | 4.43677e-10 | 1.000000 | 4.43803e-10 | 1.000000 |
| rad21          | 3.06440e-10 | 1.000000 | 3.06527e-10 | 1.000000 |
| rad1           | 2.99044e-10 | 1.000000 | 2.99129e-10 | 1.000000 |
| rad36          | 2.31909e-10 | 1.000000 | 2.31975e-10 | 1.000000 |
| rad13          | 2.31305e-10 | 1.000000 | 2.31371e-10 | 1.000000 |
| rad10          | 1.87152e-10 | 1.000000 | 1.87205e-10 | 1.000000 |
| rad7           | 1.34112e-10 | 1.000000 | 1.34151e-10 | 1.000000 |
| rad19syn       | 1.00706e-10 | 1.000000 | 1.00735e-10 | 1.000000 |
| rad72          | 9.99048e-11 | 1.000000 | 9.99331e-11 | 1.000000 |
| rad20          | 7.78027e-11 | 1.000000 | 7.78252e-11 | 1.000000 |
| rad22          | 7.53527e-11 | 1.000000 | 7.53738e-11 | 1.000000 |
| rad26          | 2.19815e-11 | 1.000000 | 2.19877e-11 | 1.000000 |
| rad18          | 2.15876e-11 | 1.000000 | 2.15938e-11 | 1.000000 |
| rad33          | 1.77089e-11 | 1.000000 | 1.77140e-11 | 1.000000 |
| rad24          | 1.53559e-11 | 1.000000 | 1.53603e-11 | 1.000000 |
| rad3           | 8.77803e-12 | 1.000000 | 8.78058e-12 | 1.000000 |
| rad4           | 7.02756e-12 | 1.000000 | 7.02956e-12 | 1.000000 |
| rad25          | 5.75824e-12 | 1.000000 | 5.75988e-12 | 1.000000 |
| rad28          | 4.01205e-12 | 1.000000 | 4.01319e-12 | 1.000000 |
| rad27          | 2.76640e-12 | 1.000000 | 2.76719e-12 | 1.000000 |
| rad31          | 2.62771e-13 | 1.000000 | 2.62846e-13 | 1.000000 |
| rad14          | 2.55242e-13 | 1.000000 | 2.55314e-13 | 1.000000 |
| rad47          | 3.45221e-14 | 1.000000 | 3.45319e-14 | 1.000000 |
| rad5           | 3.04882e-16 | 1.000000 | 3.04968e-16 | 1.000000 |

10.000000 Pa, 1400.00000 K

| Rate constant | True (fraction)    | Effective (fraction) |
|---------------|--------------------|----------------------|
| Total         | 6.19360e-12 (1.00) | 6.18997e-12 (1.00)   |

Formation of rad19 | 4.34185e-12 (0.701 ) 4.33861e-12 (0.701 )  
H-abstraction to cyc2enyl | 1.32990e-12 (0.215 ) 1.32990e-12 (0.215 )  
H-abstraction to cyclenyl | 5.21850e-13 (0.0843 ) 5.21461e-13 (0.0842 )

| species                       | PYtrue      | Cumul    | PYeffective | Cumul    |
|-------------------------------|-------------|----------|-------------|----------|
| Indene+H                      | 0.565972    | 0.565972 | 0.566304    | 0.566304 |
| Benzene+cycloprop-2-enylidene | 0.214721    | 0.780693 | 0.214847    | 0.781151 |
| PhCHCCH2+H                    | 0.113560    | 0.894253 | 0.113627    | 0.894777 |
| Benzene+cycloprop-1-enylidene | 0.0842564   | 0.978509 | 0.0842429   | 0.979020 |
| Ph+MeAc                       | 0.00387410  | 0.982384 | 0.00387638  | 0.982897 |
| Ph+Allene                     | 0.00376165  | 0.986145 | 0.00376385  | 0.986661 |
| C2H2+PhCH2                    | 0.00368053  | 0.989826 | 0.00368269  | 0.990343 |
| PhCH2CCH+H                    | 0.00231425  | 0.992140 | 0.00231560  | 0.992659 |
| PhCCCH3+H                     | 0.00159679  | 0.993737 | 0.00159772  | 0.994257 |
| rad67                         | 0.00144465  | 0.995181 | 0.00144549  | 0.995702 |
| PhcycC3H3_A+H                 | 0.00120505  | 0.996386 | 0.00120575  | 0.996908 |
| PhcycC3H3_B+H                 | 0.00109202  | 0.997478 | 0.00109266  | 0.998001 |
| PhCCH+CH3                     | 0.000988995 | 0.998467 | 0.000989580 | 0.998990 |
| Phenyl+cycC3H4                | 0.000523345 | 0.998991 | 0.000000    | 0.998990 |
| rad35                         | 0.000519617 | 0.999510 | 0.000519922 | 0.999510 |
| PAH10+CH3                     | 0.000133062 | 0.999644 | 0.000133141 | 0.999643 |
| rad37                         | 0.000104006 | 0.999748 | 0.000104068 | 0.999747 |
| PAH7+H                        | 9.76917e-05 | 0.999845 | 9.77489e-05 | 0.999845 |
| PAH9+H                        | 3.30800e-05 | 0.999878 | 3.30994e-05 | 0.999878 |
| rad38                         | 2.90129e-05 | 0.999907 | 2.90299e-05 | 0.999907 |
| PAH3+H                        | 2.10036e-05 | 0.999928 | 2.10159e-05 | 0.999928 |
| rad30                         | 2.03586e-05 | 0.999949 | 2.03705e-05 | 0.999948 |
| rad39                         | 1.60377e-05 | 0.999965 | 1.60471e-05 | 0.999965 |
| rad9                          | 1.52337e-05 | 0.999980 | 1.52426e-05 | 0.999980 |
| rad46                         | 4.61117e-06 | 0.999985 | 4.61387e-06 | 0.999984 |
| rad50                         | 3.40041e-06 | 0.999988 | 3.40241e-06 | 0.999988 |
| rad59                         | 2.10471e-06 | 0.999990 | 2.10595e-06 | 0.999990 |
| PAH1+H                        | 2.05499e-06 | 0.999992 | 2.05620e-06 | 0.999992 |
| rad60syn                      | 1.89125e-06 | 0.999994 | 1.89236e-06 | 0.999994 |
| rad54                         | 1.78185e-06 | 0.999996 | 1.78290e-06 | 0.999996 |
| rad60anti                     | 1.17076e-06 | 0.999997 | 1.17144e-06 | 0.999997 |
| rad51                         | 8.29807e-07 | 0.999998 | 8.30298e-07 | 0.999998 |
| rad43                         | 6.32329e-07 | 0.999998 | 6.32700e-07 | 0.999998 |
| rad70                         | 5.60833e-07 | 0.999999 | 5.61161e-07 | 0.999999 |
| rad52                         | 2.71449e-07 | 0.999999 | 2.71608e-07 | 0.999999 |
| rad58                         | 1.78771e-07 | 0.999999 | 1.78876e-07 | 0.999999 |
| rad61                         | 1.46575e-07 | 1.000000 | 1.46661e-07 | 0.999999 |
| rad34                         | 1.30232e-07 | 1.000000 | 1.30308e-07 | 1.000000 |
| rad55                         | 1.23655e-07 | 1.000000 | 1.23727e-07 | 1.000000 |
| rad15                         | 6.43597e-08 | 1.000000 | 6.43974e-08 | 1.000000 |
| rad12                         | 4.69315e-08 | 1.000000 | 4.69590e-08 | 1.000000 |
| rad62                         | 4.61822e-08 | 1.000000 | 4.62094e-08 | 1.000000 |
| rad41                         | 3.74542e-08 | 1.000000 | 3.74762e-08 | 1.000000 |
| PAH8+H                        | 2.64156e-08 | 1.000000 | 2.64311e-08 | 1.000000 |
| rad53                         | 2.60712e-08 | 1.000000 | 2.60865e-08 | 1.000000 |
| rad65                         | 2.43080e-08 | 1.000000 | 2.43223e-08 | 1.000000 |
| rad56                         | 2.33910e-08 | 1.000000 | 2.34047e-08 | 1.000000 |
| rad71                         | 1.42717e-08 | 1.000000 | 1.42801e-08 | 1.000000 |
| rad73                         | 1.21149e-08 | 1.000000 | 1.21220e-08 | 1.000000 |
| rad64                         | 8.81094e-09 | 1.000000 | 8.81612e-09 | 1.000000 |
| rad68syn                      | 6.91830e-09 | 1.000000 | 6.92235e-09 | 1.000000 |
| rad23                         | 6.49465e-09 | 1.000000 | 6.49846e-09 | 1.000000 |
| rad6                          | 5.26127e-09 | 1.000000 | 5.26436e-09 | 1.000000 |
| rad40syn                      | 4.59210e-09 | 1.000000 | 4.59480e-09 | 1.000000 |
| rad68anti                     | 4.52588e-09 | 1.000000 | 4.52854e-09 | 1.000000 |
| rad40anti                     | 3.60223e-09 | 1.000000 | 3.60435e-09 | 1.000000 |
| rad42                         | 3.00985e-09 | 1.000000 | 3.01162e-09 | 1.000000 |
| rad45                         | 2.13315e-09 | 1.000000 | 2.13440e-09 | 1.000000 |
| rad11                         | 1.70372e-09 | 1.000000 | 1.70471e-09 | 1.000000 |
| rad19anti                     | 1.15334e-09 | 1.000000 | 1.15401e-09 | 1.000000 |
| rad2                          | 7.90199e-10 | 1.000000 | 7.90661e-10 | 1.000000 |
| rad8                          | 5.68003e-10 | 1.000000 | 5.68336e-10 | 1.000000 |
| rad7                          | 4.57758e-10 | 1.000000 | 4.58027e-10 | 1.000000 |
| rad10                         | 4.01272e-10 | 1.000000 | 4.01507e-10 | 1.000000 |
| rad21                         | 3.69716e-10 | 1.000000 | 3.69933e-10 | 1.000000 |
| rad72                         | 3.32740e-10 | 1.000000 | 3.32934e-10 | 1.000000 |
| rad13                         | 2.66219e-10 | 1.000000 | 2.66375e-10 | 1.000000 |
| rad1                          | 2.23670e-10 | 1.000000 | 2.23801e-10 | 1.000000 |
| rad36                         | 2.14679e-10 | 1.000000 | 2.14805e-10 | 1.000000 |
| rad22                         | 9.40919e-11 | 1.000000 | 9.41469e-11 | 1.000000 |
| rad19syn                      | 8.90593e-11 | 1.000000 | 8.91116e-11 | 1.000000 |
| rad20                         | 8.64312e-11 | 1.000000 | 8.64818e-11 | 1.000000 |
| rad18                         | 6.28605e-11 | 1.000000 | 6.28974e-11 | 1.000000 |
| rad26                         | 3.26296e-11 | 1.000000 | 3.26487e-11 | 1.000000 |

|       |             |         |             |         |
|-------|-------------|---------|-------------|---------|
| rad24 | 1.80369e-11 | 1.00000 | 1.80474e-11 | 1.00000 |
| rad33 | 1.72909e-11 | 1.00000 | 1.73011e-11 | 1.00000 |
| rad25 | 7.80729e-12 | 1.00000 | 7.81185e-12 | 1.00000 |
| rad3  | 6.21407e-12 | 1.00000 | 6.21771e-12 | 1.00000 |
| rad28 | 5.46623e-12 | 1.00000 | 5.46943e-12 | 1.00000 |
| rad4  | 4.94668e-12 | 1.00000 | 4.94959e-12 | 1.00000 |
| rad27 | 3.55603e-12 | 1.00000 | 3.55812e-12 | 1.00000 |
| rad14 | 3.13644e-13 | 1.00000 | 3.13828e-13 | 1.00000 |
| rad31 | 2.62642e-13 | 1.00000 | 2.62796e-13 | 1.00000 |
| rad47 | 7.17700e-14 | 1.00000 | 7.18124e-14 | 1.00000 |
| rad5  | 5.10010e-15 | 1.00000 | 5.10309e-15 | 1.00000 |

10.000000 Pa, 1500.00000 K

| Rate constant             | True (fraction)       | Effective (fraction)  |
|---------------------------|-----------------------|-----------------------|
| Total                     | 7.80417e-12 (1.00 )   | 7.79561e-12 (1.00 )   |
| Formation of rad19        | 5.22661e-12 (0.670 )  | 5.21915e-12 (0.669 )  |
| H-abstraction to cyc2enyl | 1.80920e-12 (0.232 )  | 1.80920e-12 (0.232 )  |
| H-abstraction to cyclenyl | 7.68359e-13 (0.0985 ) | 7.67262e-13 (0.0984 ) |

| species                       | PYtrue      | Cumul    | PYeffective | Cumul    |
|-------------------------------|-------------|----------|-------------|----------|
| Indene+H                      | 0.505842    | 0.505842 | 0.506398    | 0.506398 |
| Benzene+cycloprop-2-enylidene | 0.231825    | 0.737667 | 0.232079    | 0.738477 |
| PhCHCCH2+H                    | 0.135981    | 0.873649 | 0.136131    | 0.874608 |
| Benzene+cycloprop-1-enylidene | 0.0984549   | 0.972103 | 0.0984223   | 0.973031 |
| Ph+MeAc                       | 0.00470626  | 0.976810 | 0.00471143  | 0.977742 |
| Ph+Allene                     | 0.00464817  | 0.981458 | 0.00465327  | 0.982395 |
| C2H2+PhCH2                    | 0.00447357  | 0.985931 | 0.00447848  | 0.986874 |
| PhCH2CCH+H                    | 0.00304883  | 0.988980 | 0.00305218  | 0.989926 |
| PhcycC3H3_A+H                 | 0.00198986  | 0.990970 | 0.00199204  | 0.991918 |
| PhcycC3H3_B+H                 | 0.00193291  | 0.992903 | 0.00193503  | 0.993853 |
| PhCCCH3+H                     | 0.00187682  | 0.994780 | 0.00187889  | 0.995732 |
| rad67                         | 0.00179123  | 0.996571 | 0.00179319  | 0.997525 |
| PhCCH+CH3                     | 0.00117798  | 0.997749 | 0.00117927  | 0.998704 |
| Phenyl+cycC3H4                | 0.000956146 | 0.998705 | 0.000000    | 0.998704 |
| rad35                         | 0.000644941 | 0.999350 | 0.000645649 | 0.999350 |
| PAH10+CH3                     | 0.000194257 | 0.999544 | 0.000194471 | 0.999545 |
| rad37                         | 0.000129823 | 0.999674 | 0.000129966 | 0.999674 |
| PAH7+H                        | 0.000116430 | 0.999791 | 0.000116558 | 0.999791 |
| PAH9+H                        | 4.88720e-05 | 0.999840 | 4.89256e-05 | 0.999840 |
| rad38                         | 4.16148e-05 | 0.999881 | 4.16605e-05 | 0.999882 |
| PAH3+H                        | 3.23524e-05 | 0.999914 | 3.23879e-05 | 0.999914 |
| rad30                         | 2.62859e-05 | 0.999940 | 2.63148e-05 | 0.999940 |
| rad39                         | 1.87918e-05 | 0.999959 | 1.88124e-05 | 0.999959 |
| rad9                          | 9.55959e-06 | 0.999968 | 9.57008e-06 | 0.999969 |
| rad46                         | 7.16540e-06 | 0.999975 | 7.17327e-06 | 0.999976 |
| rad50                         | 5.94261e-06 | 0.999981 | 5.94914e-06 | 0.999982 |
| PAH1+H                        | 3.25887e-06 | 0.999985 | 3.26245e-06 | 0.999985 |
| rad59                         | 3.16288e-06 | 0.999988 | 3.16635e-06 | 0.999988 |
| rad60syn                      | 2.68054e-06 | 0.999990 | 2.68349e-06 | 0.999991 |
| rad54                         | 2.39890e-06 | 0.999993 | 2.40153e-06 | 0.999993 |
| rad60anti                     | 1.66922e-06 | 0.999994 | 1.67105e-06 | 0.999995 |
| rad51                         | 1.57505e-06 | 0.999996 | 1.57678e-06 | 0.999997 |
| rad43                         | 9.05870e-07 | 0.999997 | 9.06869e-07 | 0.999997 |
| rad70                         | 8.43104e-07 | 0.999998 | 8.44030e-07 | 0.999998 |
| rad52                         | 4.93390e-07 | 0.999998 | 4.93932e-07 | 0.999999 |
| rad58                         | 3.04651e-07 | 0.999999 | 3.04985e-07 | 0.999999 |
| rad61                         | 2.56321e-07 | 0.999999 | 2.56603e-07 | 0.999999 |
| rad34                         | 2.05036e-07 | 0.999999 | 2.05260e-07 | 1.000000 |
| rad55                         | 1.72057e-07 | 0.999999 | 1.72247e-07 | 1.000000 |
| rad15                         | 9.69166e-08 | 0.999999 | 9.70230e-08 | 1.000000 |
| rad62                         | 6.20740e-08 | 0.999999 | 6.21421e-08 | 1.000000 |
| rad41                         | 5.99374e-08 | 0.999999 | 6.00032e-08 | 1.000000 |
| PAH8+H                        | 5.39287e-08 | 0.999999 | 5.39879e-08 | 1.000000 |
| rad65                         | 4.55933e-08 | 1.000000 | 4.56434e-08 | 1.000000 |
| rad53                         | 4.13061e-08 | 1.000000 | 4.13514e-08 | 1.000000 |
| rad56                         | 3.95908e-08 | 1.000000 | 3.96342e-08 | 1.000000 |
| rad12                         | 3.66610e-08 | 1.000000 | 3.67012e-08 | 1.000000 |
| rad71                         | 3.50757e-08 | 1.000000 | 3.51142e-08 | 1.000000 |
| rad73                         | 2.81215e-08 | 1.000000 | 2.81523e-08 | 1.000000 |
| rad64                         | 1.41334e-08 | 1.000000 | 1.41489e-08 | 1.000000 |
| rad68syn                      | 1.26440e-08 | 1.000000 | 1.26579e-08 | 1.000000 |
| rad40syn                      | 8.94472e-09 | 1.000000 | 8.95454e-09 | 1.000000 |
| rad68anti                     | 8.25497e-09 | 1.000000 | 8.26402e-09 | 1.000000 |
| rad6                          | 7.06575e-09 | 1.000000 | 7.07352e-09 | 1.000000 |
| rad40anti                     | 7.06099e-09 | 1.000000 | 7.06870e-09 | 1.000000 |
| rad23                         | 6.51142e-09 | 1.000000 | 6.51856e-09 | 1.000000 |
| rad42                         | 4.46957e-09 | 1.000000 | 4.47448e-09 | 1.000000 |

|           |             |          |             |          |
|-----------|-------------|----------|-------------|----------|
| rad11     | 2.44845e-09 | 1.000000 | 2.45114e-09 | 1.000000 |
| rad45     | 1.92852e-09 | 1.000000 | 1.93064e-09 | 1.000000 |
| rad72     | 9.23296e-10 | 1.000000 | 9.24309e-10 | 1.000000 |
| rad19anti | 9.06346e-10 | 1.000000 | 9.07338e-10 | 1.000000 |
| rad7      | 8.32369e-10 | 1.000000 | 8.33278e-10 | 1.000000 |
| rad10     | 6.97741e-10 | 1.000000 | 6.98508e-10 | 1.000000 |
| rad8      | 6.25808e-10 | 1.000000 | 6.26495e-10 | 1.000000 |
| rad2      | 5.86098e-10 | 1.000000 | 5.86742e-10 | 1.000000 |
| rad21     | 4.00049e-10 | 1.000000 | 4.00489e-10 | 1.000000 |
| rad13     | 2.47318e-10 | 1.000000 | 2.47589e-10 | 1.000000 |
| rad36     | 1.95511e-10 | 1.000000 | 1.95727e-10 | 1.000000 |
| rad1      | 1.67792e-10 | 1.000000 | 1.67976e-10 | 1.000000 |
| rad18     | 1.10874e-10 | 1.000000 | 1.10996e-10 | 1.000000 |
| rad22     | 1.07043e-10 | 1.000000 | 1.07161e-10 | 1.000000 |
| rad26     | 9.20517e-11 | 1.000000 | 9.21531e-11 | 1.000000 |
| rad20     | 8.61669e-11 | 1.000000 | 8.62615e-11 | 1.000000 |
| rad19syn  | 7.89908e-11 | 1.000000 | 7.90771e-11 | 1.000000 |
| rad24     | 1.99120e-11 | 1.000000 | 1.99338e-11 | 1.000000 |
| rad33     | 1.52477e-11 | 1.000000 | 1.52645e-11 | 1.000000 |
| rad28     | 9.04250e-12 | 1.000000 | 9.05242e-12 | 1.000000 |
| rad25     | 8.74420e-12 | 1.000000 | 8.75382e-12 | 1.000000 |
| rad3      | 4.42844e-12 | 1.000000 | 4.43330e-12 | 1.000000 |
| rad27     | 3.85214e-12 | 1.000000 | 3.85636e-12 | 1.000000 |
| rad4      | 3.49790e-12 | 1.000000 | 3.50174e-12 | 1.000000 |
| rad14     | 3.21014e-13 | 1.000000 | 3.21366e-13 | 1.000000 |
| rad31     | 2.56266e-13 | 1.000000 | 2.56547e-13 | 1.000000 |
| rad47     | 1.33332e-13 | 1.000000 | 1.33479e-13 | 1.000000 |
| rad5      | 7.28207e-14 | 1.000000 | 7.29003e-14 | 1.000000 |

1.00000000 Pa, 20.0000000 K

=====

| Rate constant             | True (fraction)         | Effective (fraction)    |
|---------------------------|-------------------------|-------------------------|
| Total                     | 1.24541e-22 (1.00)      | 1.24541e-22 (1.00)      |
| Formation of rad19        | 1.24541e-22 (1.00)      | 1.24541e-22 (1.00)      |
| H-abstraction to cyc2enyl | 3.84323e-68 (3.09e-46)  | 3.84323e-68 (3.09e-46)  |
| H-abstraction to cyclenyl | 6.26313e-106 (5.03e-84) | 6.26313e-106 (5.03e-84) |

| species    | PYtrue      | Cumul    | PYeffective | Cumul    |
|------------|-------------|----------|-------------|----------|
| Indene+H   | 0.999672    | 0.999672 | 0.999672    | 0.999672 |
| PhCHCCH2+H | 0.000199371 | 0.999871 | 0.000199371 | 0.999871 |
| rad9       | 0.000111826 | 0.999983 | 0.000111826 | 0.999983 |
| rad6       | 8.75088e-06 | 0.999992 | 8.75088e-06 | 0.999992 |
| PhCCH+CH3  | 2.74786e-06 | 0.999995 | 2.74786e-06 | 0.999995 |
| PhCCCH3+H  | 1.77444e-06 | 0.999996 | 1.77444e-06 | 0.999996 |
| Ph+MeAc    | 1.25541e-06 | 0.999998 | 1.25541e-06 | 0.999998 |
| C2H2+PhCH2 | 1.13954e-06 | 0.999999 | 1.13954e-06 | 0.999999 |
| rad67      | 4.23997e-07 | 0.999999 | 4.23997e-07 | 0.999999 |
| rad35      | 1.88362e-07 | 0.999999 | 1.88362e-07 | 0.999999 |
| rad15      | 8.81178e-08 | 1.000000 | 8.81178e-08 | 1.000000 |
| rad2       | 2.54385e-08 | 1.000000 | 2.54385e-08 | 1.000000 |
| rad26      | 2.52137e-08 | 1.000000 | 2.52137e-08 | 1.000000 |
| Ph+Allene  | 2.26094e-08 | 1.000000 | 2.26094e-08 | 1.000000 |
| rad28      | 1.13929e-08 | 1.000000 | 1.13929e-08 | 1.000000 |
| rad37      | 3.54905e-09 | 1.000000 | 3.54905e-09 | 1.000000 |
| rad30      | 3.31054e-09 | 1.000000 | 3.31054e-09 | 1.000000 |
| PhCH2CCH+H | 3.09417e-09 | 1.000000 | 3.09417e-09 | 1.000000 |
| rad10      | 2.09222e-09 | 1.000000 | 2.09222e-09 | 1.000000 |
| rad7       | 2.03698e-09 | 1.000000 | 2.03698e-09 | 1.000000 |
| rad1       | 1.60690e-09 | 1.000000 | 1.60690e-09 | 1.000000 |
| PAH7+H     | 1.48191e-09 | 1.000000 | 1.48191e-09 | 1.000000 |
| rad11      | 7.18969e-10 | 1.000000 | 7.18969e-10 | 1.000000 |
| rad23      | 6.28203e-10 | 1.000000 | 6.28203e-10 | 1.000000 |
| rad39      | 4.10831e-10 | 1.000000 | 4.10831e-10 | 1.000000 |
| rad3       | 2.62971e-10 | 1.000000 | 2.62971e-10 | 1.000000 |
| rad4       | 1.32821e-10 | 1.000000 | 1.32821e-10 | 1.000000 |
| PAH9+H     | 9.15975e-11 | 1.000000 | 9.15975e-11 | 1.000000 |
| rad38      | 4.22515e-11 | 1.000000 | 4.22515e-11 | 1.000000 |
| rad45      | 2.58536e-11 | 1.000000 | 2.58536e-11 | 1.000000 |
| rad60syn   | 1.39402e-11 | 1.000000 | 1.39402e-11 | 1.000000 |
| rad60anti  | 6.78971e-12 | 1.000000 | 6.78971e-12 | 1.000000 |
| rad13      | 6.21075e-12 | 1.000000 | 6.21075e-12 | 1.000000 |
| PAH3+H     | 5.38102e-12 | 1.000000 | 5.38102e-12 | 1.000000 |
| PAH10+CH3  | 3.44940e-12 | 1.000000 | 3.44940e-12 | 1.000000 |
| rad22      | 2.41270e-12 | 1.000000 | 2.41270e-12 | 1.000000 |
| rad46      | 2.20283e-12 | 1.000000 | 2.20283e-12 | 1.000000 |
| rad36      | 1.58570e-12 | 1.000000 | 1.58570e-12 | 1.000000 |
| rad59      | 1.12053e-12 | 1.000000 | 1.12053e-12 | 1.000000 |
| rad12      | 5.30273e-13 | 1.000000 | 5.30273e-13 | 1.000000 |

|                               |             |          |             |          |
|-------------------------------|-------------|----------|-------------|----------|
| PhcycC3H3_A+H                 | 4.06060e-13 | 1.000000 | 4.06060e-13 | 1.000000 |
| rad43                         | 1.81622e-13 | 1.000000 | 1.81622e-13 | 1.000000 |
| rad19anti                     | 9.49815e-14 | 1.000000 | 9.49815e-14 | 1.000000 |
| rad62                         | 3.25897e-14 | 1.000000 | 3.25897e-14 | 1.000000 |
| rad14                         | 2.78797e-14 | 1.000000 | 2.78797e-14 | 1.000000 |
| rad27                         | 2.32880e-14 | 1.000000 | 2.32880e-14 | 1.000000 |
| rad54                         | 1.43723e-14 | 1.000000 | 1.43723e-14 | 1.000000 |
| rad50                         | 1.33127e-14 | 1.000000 | 1.33127e-14 | 1.000000 |
| rad33                         | 7.80653e-15 | 1.000000 | 7.80653e-15 | 1.000000 |
| rad25                         | 4.96507e-15 | 1.000000 | 4.96507e-15 | 1.000000 |
| rad70                         | 4.79866e-16 | 1.000000 | 4.79866e-16 | 1.000000 |
| rad5                          | 4.24399e-16 | 1.000000 | 4.24399e-16 | 1.000000 |
| PAH1+H                        | 1.34478e-16 | 1.000000 | 1.34478e-16 | 1.000000 |
| rad18                         | 8.80106e-17 | 1.000000 | 8.80106e-17 | 1.000000 |
| rad55                         | 8.22507e-17 | 1.000000 | 8.22507e-17 | 1.000000 |
| rad52                         | 8.04591e-17 | 1.000000 | 8.04591e-17 | 1.000000 |
| rad58                         | 5.61047e-17 | 1.000000 | 5.61047e-17 | 1.000000 |
| Phenyl+cycC3H4                | 2.77347e-17 | 1.000000 | 0.00000     | 1.000000 |
| rad51                         | 1.87164e-17 | 1.000000 | 1.87164e-17 | 1.000000 |
| rad20                         | 1.08340e-17 | 1.000000 | 1.08340e-17 | 1.000000 |
| rad21                         | 6.78774e-18 | 1.000000 | 6.78774e-18 | 1.000000 |
| rad34                         | 4.13327e-18 | 1.000000 | 4.13327e-18 | 1.000000 |
| rad41                         | 1.64077e-18 | 1.000000 | 1.64077e-18 | 1.000000 |
| rad42                         | 1.49259e-18 | 1.000000 | 1.49259e-18 | 1.000000 |
| rad31                         | 4.84571e-19 | 1.000000 | 4.84571e-19 | 1.000000 |
| rad65                         | 3.64682e-19 | 1.000000 | 3.64682e-19 | 1.000000 |
| rad24                         | 1.96425e-19 | 1.000000 | 1.96425e-19 | 1.000000 |
| PhcycC3H3_B+H                 | 5.03529e-23 | 1.000000 | 5.03529e-23 | 1.000000 |
| rad47                         | 3.28396e-25 | 1.000000 | 3.28396e-25 | 1.000000 |
| rad53                         | 1.20639e-25 | 1.000000 | 1.20639e-25 | 1.000000 |
| rad64                         | 2.09554e-27 | 1.000000 | 2.09554e-27 | 1.000000 |
| rad61                         | 1.17462e-32 | 1.000000 | 1.17462e-32 | 1.000000 |
| rad56                         | 7.61377e-34 | 1.000000 | 7.61377e-34 | 1.000000 |
| rad68syn                      | 1.56960e-35 | 1.000000 | 1.56960e-35 | 1.000000 |
| rad68anti                     | 1.29785e-35 | 1.000000 | 1.29785e-35 | 1.000000 |
| rad19syn                      | 1.37423e-39 | 1.000000 | 1.37423e-39 | 1.000000 |
| rad73                         | 3.01903e-42 | 1.000000 | 3.01903e-42 | 1.000000 |
| rad40syn                      | 6.10960e-43 | 1.000000 | 6.10960e-43 | 1.000000 |
| rad40anti                     | 4.32663e-43 | 1.000000 | 4.32663e-43 | 1.000000 |
| PAH8+H                        | 4.92635e-46 | 1.000000 | 4.92635e-46 | 1.000000 |
| Benzene+cycloprop-2-enylidene | 3.08591e-46 | 1.000000 | 3.08591e-46 | 1.000000 |
| rad71                         | 6.00974e-49 | 1.000000 | 6.00974e-49 | 1.000000 |
| rad8                          | 1.12034e-55 | 1.000000 | 1.12034e-55 | 1.000000 |
| Benzene+cycloprop-1-enylidene | 5.02895e-84 | 1.000000 | 5.02895e-84 | 1.000000 |

1.00000000 Pa, 30.0000000 K

=====

| Rate constant             | True (fraction)        | Effective (fraction)   |
|---------------------------|------------------------|------------------------|
| Total                     | 8.13009e-20 (1.00 )    | 8.13009e-20 (1.00 )    |
| Formation of rad19        | 8.13009e-20 (1.00 )    | 8.13009e-20 (1.00 )    |
| H-abstraction to cyc2enyl | 1.08880e-49 (1.34e-30) | 1.08880e-49 (1.34e-30) |
| H-abstraction to cyclenyl | 7.55172e-75 (9.29e-56) | 7.55172e-75 (9.29e-56) |

| species    | PYtrue      | Cumul    | PYeffective | Cumul    |
|------------|-------------|----------|-------------|----------|
| Indene+H   | 0.999773    | 0.999773 | 0.999773    | 0.999773 |
| PhCHCCH2+H | 0.000209655 | 0.999983 | 0.000209655 | 0.999983 |
| rad6       | 7.41591e-06 | 0.999990 | 7.41591e-06 | 0.999990 |
| PhCCH+CH3  | 3.02711e-06 | 0.999993 | 3.02711e-06 | 0.999993 |
| PhCCCH3+H  | 1.92093e-06 | 0.999995 | 1.92093e-06 | 0.999995 |
| C2H2+PhCH2 | 1.42049e-06 | 0.999996 | 1.42049e-06 | 0.999996 |
| Ph+MeAc    | 1.38375e-06 | 0.999998 | 1.38375e-06 | 0.999998 |
| rad9       | 1.34447e-06 | 0.999999 | 1.34447e-06 | 0.999999 |
| rad67      | 4.51993e-07 | 1.000000 | 4.51993e-07 | 1.000000 |
| rad35      | 2.00409e-07 | 1.000000 | 2.00409e-07 | 1.000000 |
| Ph+Allene  | 3.69349e-08 | 1.000000 | 3.69349e-08 | 1.000000 |
| rad28      | 1.00707e-08 | 1.000000 | 1.00707e-08 | 1.000000 |
| rad2       | 8.91173e-09 | 1.000000 | 8.91173e-09 | 1.000000 |
| PhCH2CCH+H | 4.71690e-09 | 1.000000 | 4.71690e-09 | 1.000000 |
| rad37      | 4.11480e-09 | 1.000000 | 4.11480e-09 | 1.000000 |
| PAH7+H     | 3.57000e-09 | 1.000000 | 3.57000e-09 | 1.000000 |
| rad30      | 3.5522e-09  | 1.000000 | 3.5522e-09  | 1.000000 |
| rad26      | 2.76415e-09 | 1.000000 | 2.76415e-09 | 1.000000 |
| rad7       | 1.50970e-09 | 1.000000 | 1.50970e-09 | 1.000000 |
| rad39      | 9.95806e-10 | 1.000000 | 9.95806e-10 | 1.000000 |
| rad15      | 9.70464e-10 | 1.000000 | 9.70464e-10 | 1.000000 |
| rad10      | 6.90674e-10 | 1.000000 | 6.90674e-10 | 1.000000 |
| rad1       | 5.63229e-10 | 1.000000 | 5.63229e-10 | 1.000000 |
| rad11      | 5.07787e-10 | 1.000000 | 5.07787e-10 | 1.000000 |

|                               |             |          |             |          |
|-------------------------------|-------------|----------|-------------|----------|
| rad23                         | 2.69892e-10 | 1.000000 | 2.69892e-10 | 1.000000 |
| PAH9+H                        | 1.18010e-10 | 1.000000 | 1.18010e-10 | 1.000000 |
| rad3                          | 9.81522e-11 | 1.000000 | 9.81522e-11 | 1.000000 |
| rad38                         | 5.40490e-11 | 1.000000 | 5.40490e-11 | 1.000000 |
| rad4                          | 4.95796e-11 | 1.000000 | 4.95796e-11 | 1.000000 |
| rad60syn                      | 1.51979e-11 | 1.000000 | 1.51979e-11 | 1.000000 |
| rad45                         | 9.40558e-12 | 1.000000 | 9.40558e-12 | 1.000000 |
| rad60anti                     | 7.41157e-12 | 1.000000 | 7.41157e-12 | 1.000000 |
| PAH3+H                        | 5.96165e-12 | 1.000000 | 5.96165e-12 | 1.000000 |
| rad13                         | 4.57751e-12 | 1.000000 | 4.57751e-12 | 1.000000 |
| PAH10+CH3                     | 4.44500e-12 | 1.000000 | 4.44500e-12 | 1.000000 |
| rad46                         | 2.84906e-12 | 1.000000 | 2.84906e-12 | 1.000000 |
| rad59                         | 1.23877e-12 | 1.000000 | 1.23877e-12 | 1.000000 |
| rad22                         | 7.76027e-13 | 1.000000 | 7.76027e-13 | 1.000000 |
| rad36                         | 5.76776e-13 | 1.000000 | 5.76776e-13 | 1.000000 |
| PhcycC3H3_A+H                 | 4.35577e-13 | 1.000000 | 4.35577e-13 | 1.000000 |
| rad43                         | 2.15886e-13 | 1.000000 | 2.15886e-13 | 1.000000 |
| rad62                         | 3.95459e-14 | 1.000000 | 3.95459e-14 | 1.000000 |
| rad54                         | 3.10568e-14 | 1.000000 | 3.10568e-14 | 1.000000 |
| rad50                         | 1.73694e-14 | 1.000000 | 1.73694e-14 | 1.000000 |
| rad14                         | 9.66790e-15 | 1.000000 | 9.66790e-15 | 1.000000 |
| rad27                         | 7.21667e-15 | 1.000000 | 7.21667e-15 | 1.000000 |
| rad12                         | 6.34946e-15 | 1.000000 | 6.34946e-15 | 1.000000 |
| rad33                         | 6.14801e-15 | 1.000000 | 6.14801e-15 | 1.000000 |
| rad25                         | 3.44691e-15 | 1.000000 | 3.44691e-15 | 1.000000 |
| rad19anti                     | 1.00148e-15 | 1.000000 | 1.00148e-15 | 1.000000 |
| rad70                         | 7.28433e-16 | 1.000000 | 7.28433e-16 | 1.000000 |
| PAH1+H                        | 2.03769e-16 | 1.000000 | 2.03769e-16 | 1.000000 |
| rad55                         | 1.82230e-16 | 1.000000 | 1.82230e-16 | 1.000000 |
| rad52                         | 1.05856e-16 | 1.000000 | 1.05856e-16 | 1.000000 |
| rad58                         | 6.51259e-17 | 1.000000 | 6.51259e-17 | 1.000000 |
| Phenyl+cycC3H4                | 5.25631e-17 | 1.000000 | 0.00000     | 1.000000 |
| rad5                          | 3.65183e-17 | 1.000000 | 3.65183e-17 | 1.000000 |
| rad51                         | 2.48837e-17 | 1.000000 | 2.48837e-17 | 1.000000 |
| rad18                         | 1.20505e-17 | 1.000000 | 1.20505e-17 | 1.000000 |
| rad34                         | 6.33556e-18 | 1.000000 | 6.33556e-18 | 1.000000 |
| rad20                         | 2.27650e-18 | 1.000000 | 2.27650e-18 | 1.000000 |
| rad41                         | 2.19359e-18 | 1.000000 | 2.19359e-18 | 1.000000 |
| rad42                         | 2.00095e-18 | 1.000000 | 2.00095e-18 | 1.000000 |
| rad21                         | 1.44495e-18 | 1.000000 | 1.44495e-18 | 1.000000 |
| rad65                         | 4.87455e-19 | 1.000000 | 4.87455e-19 | 1.000000 |
| rad31                         | 1.72197e-19 | 1.000000 | 1.72197e-19 | 1.000000 |
| rad24                         | 7.15385e-20 | 1.000000 | 7.15385e-20 | 1.000000 |
| PhcycC3H3_B+H                 | 2.89756e-23 | 1.000000 | 2.89756e-23 | 1.000000 |
| rad53                         | 2.35108e-25 | 1.000000 | 2.35108e-25 | 1.000000 |
| rad47                         | 2.02868e-25 | 1.000000 | 2.02868e-25 | 1.000000 |
| rad64                         | 3.92594e-27 | 1.000000 | 3.92594e-27 | 1.000000 |
| Benzene+cycloprop-2-enylidene | 1.33923e-30 | 1.000000 | 1.33923e-30 | 1.000000 |
| rad61                         | 5.61359e-33 | 1.000000 | 5.61359e-33 | 1.000000 |
| rad56                         | 8.54807e-34 | 1.000000 | 8.54807e-34 | 1.000000 |
| rad68syn                      | 1.58928e-35 | 1.000000 | 1.58928e-35 | 1.000000 |
| rad68anti                     | 1.31866e-35 | 1.000000 | 1.31866e-35 | 1.000000 |
| rad19syn                      | 8.38629e-40 | 1.000000 | 8.38629e-40 | 1.000000 |
| rad73                         | 2.02206e-42 | 1.000000 | 2.02206e-42 | 1.000000 |
| rad40syn                      | 3.14007e-43 | 1.000000 | 3.14007e-43 | 1.000000 |
| rad40anti                     | 2.29047e-43 | 1.000000 | 2.29047e-43 | 1.000000 |
| PAH8+H                        | 1.52149e-46 | 1.000000 | 1.52149e-46 | 1.000000 |
| rad71                         | 1.72651e-49 | 1.000000 | 1.72651e-49 | 1.000000 |
| Benzene+cycloprop-1-enylidene | 9.28861e-56 | 1.000000 | 9.28861e-56 | 1.000000 |
| rad8                          | 2.20798e-56 | 1.000000 | 2.20798e-56 | 1.000000 |

1.00000000 Pa, 40.0000000 K

=====

| Rate constant             | True (fraction)        | Effective (fraction)   |
|---------------------------|------------------------|------------------------|
| Total                     | 2.24819e-18 (1.00 )    | 2.24819e-18 (1.00 )    |
| Formation of rad19        | 2.24819e-18 (1.00 )    | 2.24819e-18 (1.00 )    |
| H-abstraction to cyc2enyl | 1.72361e-40 (7.67e-23) | 1.72361e-40 (7.67e-23) |
| H-abstraction to cyc1enyl | 2.48792e-59 (1.11e-41) | 2.48792e-59 (1.11e-41) |

| species    | PYtrue      | Cumul    | PYeffective | Cumul    |
|------------|-------------|----------|-------------|----------|
| Indene+H   | 0.999769    | 0.999769 | 0.999769    | 0.999769 |
| PhCHCCH2+H | 0.000215506 | 0.999985 | 0.000215506 | 0.999985 |
| rad6       | 6.22076e-06 | 0.999991 | 6.22076e-06 | 0.999991 |
| PhCCH+CH3  | 3.21148e-06 | 0.999994 | 3.21148e-06 | 0.999994 |
| PhCCCH3+H  | 2.00554e-06 | 0.999996 | 2.00554e-06 | 0.999996 |
| C2H2+PhCH2 | 1.64255e-06 | 0.999998 | 1.64255e-06 | 0.999998 |
| Ph+MeAc    | 1.45766e-06 | 0.999999 | 1.45766e-06 | 0.999999 |
| rad67      | 4.68713e-07 | 1.000000 | 4.68713e-07 | 1.000000 |

|                               |             |          |             |          |
|-------------------------------|-------------|----------|-------------|----------|
| rad35                         | 2.07555e-07 | 1.000000 | 2.07555e-07 | 1.000000 |
| rad9                          | 8.22218e-08 | 1.000000 | 8.22218e-08 | 1.000000 |
| Ph+Allene                     | 4.94704e-08 | 1.000000 | 4.94704e-08 | 1.000000 |
| rad28                         | 8.29604e-09 | 1.000000 | 8.29604e-09 | 1.000000 |
| rad2                          | 6.83545e-09 | 1.000000 | 6.83545e-09 | 1.000000 |
| PhCH2CCH+H                    | 6.15165e-09 | 1.000000 | 6.15165e-09 | 1.000000 |
| PAH7+H                        | 5.44878e-09 | 1.000000 | 5.44878e-09 | 1.000000 |
| rad37                         | 4.39559e-09 | 1.000000 | 4.39559e-09 | 1.000000 |
| rad30                         | 3.71000e-09 | 1.000000 | 3.71000e-09 | 1.000000 |
| rad39                         | 1.52345e-09 | 1.000000 | 1.52345e-09 | 1.000000 |
| rad7                          | 1.17942e-09 | 1.000000 | 1.17942e-09 | 1.000000 |
| rad26                         | 1.08990e-09 | 1.000000 | 1.08990e-09 | 1.000000 |
| rad10                         | 5.14982e-10 | 1.000000 | 5.14982e-10 | 1.000000 |
| rad1                          | 4.32490e-10 | 1.000000 | 4.32490e-10 | 1.000000 |
| rad11                         | 3.86764e-10 | 1.000000 | 3.86764e-10 | 1.000000 |
| rad23                         | 1.50779e-10 | 1.000000 | 1.50779e-10 | 1.000000 |
| PAH9+H                        | 1.39245e-10 | 1.000000 | 1.39245e-10 | 1.000000 |
| rad3                          | 7.31016e-11 | 1.000000 | 7.31016e-11 | 1.000000 |
| rad38                         | 6.30274e-11 | 1.000000 | 6.30274e-11 | 1.000000 |
| rad15                         | 5.66591e-11 | 1.000000 | 5.66591e-11 | 1.000000 |
| rad4                          | 3.69342e-11 | 1.000000 | 3.69342e-11 | 1.000000 |
| rad60syn                      | 1.60296e-11 | 1.000000 | 1.60296e-11 | 1.000000 |
| rad60anti                     | 7.82445e-12 | 1.000000 | 7.82445e-12 | 1.000000 |
| PAH3+H                        | 6.36783e-12 | 1.000000 | 6.36783e-12 | 1.000000 |
| PAH10+CH3                     | 5.04141e-12 | 1.000000 | 5.04141e-12 | 1.000000 |
| rad45                         | 4.80716e-12 | 1.000000 | 4.80716e-12 | 1.000000 |
| rad13                         | 3.58494e-12 | 1.000000 | 3.58494e-12 | 1.000000 |
| rad46                         | 3.37578e-12 | 1.000000 | 3.37578e-12 | 1.000000 |
| rad59                         | 1.32078e-12 | 1.000000 | 1.32078e-12 | 1.000000 |
| PhcycC3H3_A+H                 | 4.94735e-13 | 1.000000 | 4.94735e-13 | 1.000000 |
| rad22                         | 3.63227e-13 | 1.000000 | 3.63227e-13 | 1.000000 |
| rad36                         | 2.94688e-13 | 1.000000 | 2.94688e-13 | 1.000000 |
| rad43                         | 2.37823e-13 | 1.000000 | 2.37823e-13 | 1.000000 |
| rad54                         | 4.74651e-14 | 1.000000 | 4.74651e-14 | 1.000000 |
| rad62                         | 4.42690e-14 | 1.000000 | 4.42690e-14 | 1.000000 |
| rad50                         | 2.07814e-14 | 1.000000 | 2.07814e-14 | 1.000000 |
| rad14                         | 6.91575e-15 | 1.000000 | 6.91575e-15 | 1.000000 |
| rad27                         | 5.21399e-15 | 1.000000 | 5.21399e-15 | 1.000000 |
| rad33                         | 5.01848e-15 | 1.000000 | 5.01848e-15 | 1.000000 |
| rad25                         | 2.63081e-15 | 1.000000 | 2.63081e-15 | 1.000000 |
| rad70                         | 9.75477e-16 | 1.000000 | 9.75477e-16 | 1.000000 |
| rad12                         | 3.88538e-16 | 1.000000 | 3.88538e-16 | 1.000000 |
| rad55                         | 2.86120e-16 | 1.000000 | 2.86120e-16 | 1.000000 |
| PAH1+H                        | 2.63958e-16 | 1.000000 | 2.63958e-16 | 1.000000 |
| rad52                         | 1.27759e-16 | 1.000000 | 1.27759e-16 | 1.000000 |
| Phenyl+cycC3H4                | 1.15738e-16 | 1.000000 | 0.00000     | 1.000000 |
| rad58                         | 7.27557e-17 | 1.000000 | 7.27557e-17 | 1.000000 |
| rad19anti                     | 5.77855e-17 | 1.000000 | 5.77855e-17 | 1.000000 |
| rad51                         | 3.03762e-17 | 1.000000 | 3.03762e-17 | 1.000000 |
| rad5                          | 1.30237e-17 | 1.000000 | 1.30237e-17 | 1.000000 |
| rad34                         | 8.71199e-18 | 1.000000 | 8.71199e-18 | 1.000000 |
| rad18                         | 3.67001e-18 | 1.000000 | 3.67001e-18 | 1.000000 |
| rad41                         | 2.72071e-18 | 1.000000 | 2.72071e-18 | 1.000000 |
| rad42                         | 2.44186e-18 | 1.000000 | 2.44186e-18 | 1.000000 |
| rad20                         | 9.43059e-19 | 1.000000 | 9.43059e-19 | 1.000000 |
| rad21                         | 6.03118e-19 | 1.000000 | 6.03118e-19 | 1.000000 |
| rad65                         | 5.98068e-19 | 1.000000 | 5.98068e-19 | 1.000000 |
| rad31                         | 1.32338e-19 | 1.000000 | 1.32338e-19 | 1.000000 |
| rad24                         | 3.67821e-20 | 1.000000 | 3.67821e-20 | 1.000000 |
| Benzene+cycloprop-2-enylidene | 7.66665e-23 | 1.000000 | 7.66665e-23 | 1.000000 |
| PhcycC3H3_B+H                 | 3.78841e-23 | 1.000000 | 3.78841e-23 | 1.000000 |
| rad53                         | 4.54508e-25 | 1.000000 | 4.54508e-25 | 1.000000 |
| rad47                         | 1.61368e-25 | 1.000000 | 1.61368e-25 | 1.000000 |
| rad64                         | 7.25273e-27 | 1.000000 | 7.25273e-27 | 1.000000 |
| rad61                         | 7.01829e-33 | 1.000000 | 7.01829e-33 | 1.000000 |
| rad56                         | 1.12868e-33 | 1.000000 | 1.12868e-33 | 1.000000 |
| rad68syn                      | 1.95501e-35 | 1.000000 | 1.95501e-35 | 1.000000 |
| rad68anti                     | 1.62600e-35 | 1.000000 | 1.62600e-35 | 1.000000 |
| rad19syn                      | 8.61373e-40 | 1.000000 | 8.61373e-40 | 1.000000 |
| Benzene+cycloprop-1-enylidene | 1.10663e-41 | 1.000000 | 1.10663e-41 | 1.000000 |
| rad73                         | 1.89855e-42 | 1.000000 | 1.89855e-42 | 1.000000 |
| rad40syn                      | 2.50347e-43 | 1.000000 | 2.50347e-43 | 1.000000 |
| rad40anti                     | 1.85609e-43 | 1.000000 | 1.85609e-43 | 1.000000 |
| PAH8+H                        | 8.96767e-47 | 1.000000 | 8.96767e-47 | 1.000000 |
| rad71                         | 9.76261e-50 | 1.000000 | 9.76261e-50 | 1.000000 |
| rad8                          | 1.48016e-56 | 1.000000 | 1.48016e-56 | 1.000000 |

1.00000000 Pa, 50.0000000 K

=====

Rate constant | True (fraction) Effective (fraction)



```

-----
Total | 1.72707e-17 (1.00 ) 1.72707e-17 (1.00 )
Formation of rad19 | 1.72707e-17 (1.00 ) 1.72707e-17 (1.00 )
H-abstraction to cyc2enyl | 5.49905e-35 (3.18e-18) 5.49905e-35 (3.18e-18)
H-abstraction to cyclenyl | 4.93090e-50 (2.86e-33) 4.93090e-50 (2.86e-33)

```

| species                       | PYtrue      | Cumul    | PYeffective | Cumul    |
|-------------------------------|-------------|----------|-------------|----------|
| Indene+H                      | 0.999764    | 0.999764 | 0.999764    | 0.999764 |
| PhCHCCH2+H                    | 0.000220836 | 0.999985 | 0.000220836 | 0.999985 |
| rad6                          | 5.23747e-06 | 0.999990 | 5.23747e-06 | 0.999990 |
| PhCCH+CH3                     | 3.37462e-06 | 0.999993 | 3.37462e-06 | 0.999993 |
| PhCCCH3+H                     | 2.08061e-06 | 0.999996 | 2.08061e-06 | 0.999996 |
| C2H2+PhCH2                    | 1.83951e-06 | 0.999997 | 1.83951e-06 | 0.999997 |
| Ph+MeAc                       | 1.52337e-06 | 0.999999 | 1.52337e-06 | 0.999999 |
| rad67                         | 4.84347e-07 | 0.999999 | 4.84347e-07 | 0.999999 |
| rad35                         | 2.14212e-07 | 1.000000 | 2.14212e-07 | 1.000000 |
| Ph+Allene                     | 6.11832e-08 | 1.000000 | 6.11832e-08 | 1.000000 |
| rad9                          | 1.08654e-08 | 1.000000 | 1.08654e-08 | 1.000000 |
| PhCH2CCH+H                    | 7.52551e-09 | 1.000000 | 7.52551e-09 | 1.000000 |
| PAH7+H                        | 7.16769e-09 | 1.000000 | 7.16769e-09 | 1.000000 |
| rad28                         | 6.84574e-09 | 1.000000 | 6.84574e-09 | 1.000000 |
| rad2                          | 5.70279e-09 | 1.000000 | 5.70279e-09 | 1.000000 |
| rad37                         | 4.62939e-09 | 1.000000 | 4.62939e-09 | 1.000000 |
| rad30                         | 3.85346e-09 | 1.000000 | 3.85346e-09 | 1.000000 |
| rad39                         | 2.00697e-09 | 1.000000 | 2.00697e-09 | 1.000000 |
| rad7                          | 9.46975e-10 | 1.000000 | 9.46975e-10 | 1.000000 |
| rad26                         | 7.45939e-10 | 1.000000 | 7.45939e-10 | 1.000000 |
| rad10                         | 4.21829e-10 | 1.000000 | 4.21829e-10 | 1.000000 |
| rad1                          | 3.61408e-10 | 1.000000 | 3.61408e-10 | 1.000000 |
| rad11                         | 3.05365e-10 | 1.000000 | 3.05365e-10 | 1.000000 |
| PAH9+H                        | 1.58736e-10 | 1.000000 | 1.58736e-10 | 1.000000 |
| rad23                         | 9.47569e-11 | 1.000000 | 9.47569e-11 | 1.000000 |
| rad38                         | 7.12352e-11 | 1.000000 | 7.12352e-11 | 1.000000 |
| rad3                          | 5.90924e-11 | 1.000000 | 5.90924e-11 | 1.000000 |
| rad4                          | 2.98663e-11 | 1.000000 | 2.98663e-11 | 1.000000 |
| rad60syn                      | 1.68306e-11 | 1.000000 | 1.68306e-11 | 1.000000 |
| rad60anti                     | 8.22328e-12 | 1.000000 | 8.22328e-12 | 1.000000 |
| rad15                         | 7.26003e-12 | 1.000000 | 7.26003e-12 | 1.000000 |
| PAH3+H                        | 6.77478e-12 | 1.000000 | 6.77478e-12 | 1.000000 |
| PAH10+CH3                     | 5.58217e-12 | 1.000000 | 5.58217e-12 | 1.000000 |
| rad46                         | 3.87099e-12 | 1.000000 | 3.87099e-12 | 1.000000 |
| rad13                         | 2.89082e-12 | 1.000000 | 2.89082e-12 | 1.000000 |
| rad45                         | 2.84626e-12 | 1.000000 | 2.84626e-12 | 1.000000 |
| rad59                         | 1.40250e-12 | 1.000000 | 1.40250e-12 | 1.000000 |
| PhcycC3H3_A+H                 | 5.79234e-13 | 1.000000 | 5.79234e-13 | 1.000000 |
| rad43                         | 2.58805e-13 | 1.000000 | 2.58805e-13 | 1.000000 |
| rad22                         | 2.01177e-13 | 1.000000 | 2.01177e-13 | 1.000000 |
| rad36                         | 1.74408e-13 | 1.000000 | 1.74408e-13 | 1.000000 |
| rad54                         | 6.44724e-14 | 1.000000 | 6.44724e-14 | 1.000000 |
| rad62                         | 4.88499e-14 | 1.000000 | 4.88499e-14 | 1.000000 |
| rad50                         | 2.41803e-14 | 1.000000 | 2.41803e-14 | 1.000000 |
| rad14                         | 5.44708e-15 | 1.000000 | 5.44708e-15 | 1.000000 |
| rad27                         | 4.19069e-15 | 1.000000 | 4.19069e-15 | 1.000000 |
| rad33                         | 4.16855e-15 | 1.000000 | 4.16855e-15 | 1.000000 |
| rad25                         | 2.09043e-15 | 1.000000 | 2.09043e-15 | 1.000000 |
| rad70                         | 1.24655e-15 | 1.000000 | 1.24655e-15 | 1.000000 |
| rad55                         | 4.00253e-16 | 1.000000 | 4.00253e-16 | 1.000000 |
| PAH1+H                        | 3.30531e-16 | 1.000000 | 3.30531e-16 | 1.000000 |
| Phenyl+cycC3H4                | 2.36668e-16 | 1.000000 | 0.000000    | 1.000000 |
| rad52                         | 1.50390e-16 | 1.000000 | 1.50390e-16 | 1.000000 |
| rad58                         | 8.13300e-17 | 1.000000 | 8.13300e-17 | 1.000000 |
| rad12                         | 5.14693e-17 | 1.000000 | 5.14693e-17 | 1.000000 |
| rad51                         | 3.62795e-17 | 1.000000 | 3.62795e-17 | 1.000000 |
| rad34                         | 1.15373e-17 | 1.000000 | 1.15373e-17 | 1.000000 |
| rad19anti                     | 7.38725e-18 | 1.000000 | 7.38725e-18 | 1.000000 |
| rad5                          | 6.39306e-18 | 1.000000 | 6.39306e-18 | 1.000000 |
| rad41                         | 3.37610e-18 | 1.000000 | 3.37610e-18 | 1.000000 |
| Benzene+cycloprop-2-enylidene | 3.18404e-18 | 1.000000 | 3.18404e-18 | 1.000000 |
| rad42                         | 2.95975e-18 | 1.000000 | 2.95975e-18 | 1.000000 |
| rad18                         | 1.56178e-18 | 1.000000 | 1.56178e-18 | 1.000000 |
| rad65                         | 7.19036e-19 | 1.000000 | 7.19036e-19 | 1.000000 |
| rad20                         | 5.08048e-19 | 1.000000 | 5.08048e-19 | 1.000000 |
| rad21                         | 3.26643e-19 | 1.000000 | 3.26643e-19 | 1.000000 |
| rad31                         | 1.10977e-19 | 1.000000 | 1.10977e-19 | 1.000000 |
| rad24                         | 2.19349e-20 | 1.000000 | 2.19349e-20 | 1.000000 |
| PhcycC3H3_B+H                 | 3.75164e-22 | 1.000000 | 3.75164e-22 | 1.000000 |
| rad53                         | 9.83325e-25 | 1.000000 | 9.83325e-25 | 1.000000 |
| rad47                         | 1.39287e-25 | 1.000000 | 1.39287e-25 | 1.000000 |
| rad64                         | 1.51563e-26 | 1.000000 | 1.51563e-26 | 1.000000 |

|                               |             |          |             |          |
|-------------------------------|-------------|----------|-------------|----------|
| rad61                         | 1.29455e-32 | 1.000000 | 1.29455e-32 | 1.000000 |
| Benzene+cycloprop-1-enylidene | 2.85507e-33 | 1.000000 | 2.85507e-33 | 1.000000 |
| rad56                         | 1.86855e-33 | 1.000000 | 1.86855e-33 | 1.000000 |
| rad68syn                      | 3.08124e-35 | 1.000000 | 3.08124e-35 | 1.000000 |
| rad68anti                     | 2.56700e-35 | 1.000000 | 2.56700e-35 | 1.000000 |
| rad19syn                      | 1.15716e-39 | 1.000000 | 1.15716e-39 | 1.000000 |
| rad73                         | 2.49768e-42 | 1.000000 | 2.49768e-42 | 1.000000 |
| rad40syn                      | 2.96662e-43 | 1.000000 | 2.96662e-43 | 1.000000 |
| rad40anti                     | 2.22109e-43 | 1.000000 | 2.22109e-43 | 1.000000 |
| PAH8+H                        | 8.80516e-47 | 1.000000 | 8.80516e-47 | 1.000000 |
| rad71                         | 9.34905e-50 | 1.000000 | 9.34905e-50 | 1.000000 |
| rad8                          | 1.29253e-56 | 1.000000 | 1.29253e-56 | 1.000000 |

1.00000000 Pa, 60.0000000 K

| Rate constant             | True (fraction)        | Effective (fraction)   |
|---------------------------|------------------------|------------------------|
| Total                     | 6.93738e-17 (1.00 )    | 6.93738e-17 (1.00 )    |
| Formation of rad19        | 6.93738e-17 (1.000 )   | 6.93738e-17 (1.000 )   |
| H-abstraction to cyc2enyl | 2.50609e-31 (3.61e-15) | 2.50609e-31 (3.61e-15) |
| H-abstraction to cyclenyl | 7.62015e-44 (1.10e-27) | 7.62015e-44 (1.10e-27) |

| species                       | PYtrue      | Cumul    | PYeffective | Cumul    |
|-------------------------------|-------------|----------|-------------|----------|
| Indene+H                      | 0.999759    | 0.999759 | 0.999759    | 0.999759 |
| PhCHCCH2+H                    | 0.000226156 | 0.999985 | 0.000226156 | 0.999985 |
| rad6                          | 4.42562e-06 | 0.999990 | 4.42562e-06 | 0.999990 |
| PhCCH+CH3                     | 3.52807e-06 | 0.999993 | 3.52807e-06 | 0.999993 |
| PhCCCH3+H                     | 2.15337e-06 | 0.999995 | 2.15337e-06 | 0.999995 |
| C2H2+PhCH2                    | 2.02071e-06 | 0.999997 | 2.02071e-06 | 0.999997 |
| Ph+MeAc                       | 1.58760e-06 | 0.999999 | 1.58760e-06 | 0.999999 |
| rad67                         | 5.00218e-07 | 0.999999 | 5.00218e-07 | 0.999999 |
| rad35                         | 2.20954e-07 | 1.000000 | 2.20954e-07 | 1.000000 |
| Ph+Allene                     | 7.24451e-08 | 1.000000 | 7.24451e-08 | 1.000000 |
| PhCH2CCH+H                    | 8.88046e-09 | 1.000000 | 8.88046e-09 | 1.000000 |
| PAH7+H                        | 8.77497e-09 | 1.000000 | 8.77497e-09 | 1.000000 |
| rad28                         | 5.68592e-09 | 1.000000 | 5.68592e-09 | 1.000000 |
| rad37                         | 4.85426e-09 | 1.000000 | 4.85426e-09 | 1.000000 |
| rad2                          | 4.82159e-09 | 1.000000 | 4.82159e-09 | 1.000000 |
| rad30                         | 3.99650e-09 | 1.000000 | 3.99650e-09 | 1.000000 |
| rad39                         | 2.45967e-09 | 1.000000 | 2.45967e-09 | 1.000000 |
| rad9                          | 2.25408e-09 | 1.000000 | 2.25408e-09 | 1.000000 |
| rad7                          | 7.72562e-10 | 1.000000 | 7.72562e-10 | 1.000000 |
| rad26                         | 5.97522e-10 | 1.000000 | 5.97522e-10 | 1.000000 |
| rad10                         | 3.51851e-10 | 1.000000 | 3.51851e-10 | 1.000000 |
| rad1                          | 3.06177e-10 | 1.000000 | 3.06177e-10 | 1.000000 |
| rad11                         | 2.46061e-10 | 1.000000 | 2.46061e-10 | 1.000000 |
| PAH9+H                        | 1.77340e-10 | 1.000000 | 1.77340e-10 | 1.000000 |
| rad38                         | 7.91299e-11 | 1.000000 | 7.91299e-11 | 1.000000 |
| rad23                         | 6.36860e-11 | 1.000000 | 6.36860e-11 | 1.000000 |
| rad3                          | 4.87271e-11 | 1.000000 | 4.87271e-11 | 1.000000 |
| rad4                          | 2.46382e-11 | 1.000000 | 2.46382e-11 | 1.000000 |
| rad60syn                      | 1.76539e-11 | 1.000000 | 1.76539e-11 | 1.000000 |
| rad60anti                     | 8.63421e-12 | 1.000000 | 8.63421e-12 | 1.000000 |
| PAH3+H                        | 7.20572e-12 | 1.000000 | 7.20572e-12 | 1.000000 |
| PAH10+CH3                     | 6.13522e-12 | 1.000000 | 6.13522e-12 | 1.000000 |
| rad46                         | 4.35543e-12 | 1.000000 | 4.35543e-12 | 1.000000 |
| rad13                         | 2.36985e-12 | 1.000000 | 2.36985e-12 | 1.000000 |
| rad45                         | 1.83020e-12 | 1.000000 | 1.83020e-12 | 1.000000 |
| rad59                         | 1.48866e-12 | 1.000000 | 1.48866e-12 | 1.000000 |
| rad15                         | 1.47225e-12 | 1.000000 | 1.47225e-12 | 1.000000 |
| PhcycC3H3_A+H                 | 6.88848e-13 | 1.000000 | 6.88848e-13 | 1.000000 |
| rad43                         | 2.80731e-13 | 1.000000 | 2.80731e-13 | 1.000000 |
| rad22                         | 1.22701e-13 | 1.000000 | 1.22701e-13 | 1.000000 |
| rad36                         | 1.12103e-13 | 1.000000 | 1.12103e-13 | 1.000000 |
| rad54                         | 8.25504e-14 | 1.000000 | 8.25504e-14 | 1.000000 |
| rad62                         | 5.36545e-14 | 1.000000 | 5.36545e-14 | 1.000000 |
| rad50                         | 2.77058e-14 | 1.000000 | 2.77058e-14 | 1.000000 |
| rad14                         | 4.41093e-15 | 1.000000 | 4.41093e-15 | 1.000000 |
| Benzene+cycloprop-2-enylidene | 3.61245e-15 | 1.000000 | 3.61245e-15 | 1.000000 |
| rad33                         | 3.49653e-15 | 1.000000 | 3.49653e-15 | 1.000000 |
| rad27                         | 3.45216e-15 | 1.000000 | 3.45216e-15 | 1.000000 |
| rad25                         | 1.69737e-15 | 1.000000 | 1.69737e-15 | 1.000000 |
| rad70                         | 1.55143e-15 | 1.000000 | 1.55143e-15 | 1.000000 |
| rad55                         | 5.28604e-16 | 1.000000 | 5.28604e-16 | 1.000000 |
| Phenyl+cycC3H4                | 4.45921e-16 | 1.000000 | 0.000000    | 1.000000 |
| PAH1+H                        | 4.08280e-16 | 1.000000 | 4.08280e-16 | 1.000000 |
| rad52                         | 1.74711e-16 | 1.000000 | 1.74711e-16 | 1.000000 |
| rad58                         | 9.12139e-17 | 1.000000 | 9.12139e-17 | 1.000000 |
| rad51                         | 4.28645e-17 | 1.000000 | 4.28645e-17 | 1.000000 |

|                               |             |          |             |          |
|-------------------------------|-------------|----------|-------------|----------|
| rad34                         | 1.49561e-17 | 1.000000 | 1.49561e-17 | 1.000000 |
| rad12                         | 1.07153e-17 | 1.000000 | 1.07153e-17 | 1.000000 |
| rad41                         | 4.20316e-18 | 1.000000 | 4.20316e-18 | 1.000000 |
| rad42                         | 3.59597e-18 | 1.000000 | 3.59597e-18 | 1.000000 |
| rad5                          | 3.58503e-18 | 1.000000 | 3.58503e-18 | 1.000000 |
| rad19anti                     | 1.50080e-18 | 1.000000 | 1.50080e-18 | 1.000000 |
| rad65                         | 8.56254e-19 | 1.000000 | 8.56254e-19 | 1.000000 |
| rad18                         | 7.97815e-19 | 1.000000 | 7.97815e-19 | 1.000000 |
| rad20                         | 3.14244e-19 | 1.000000 | 3.14244e-19 | 1.000000 |
| rad21                         | 2.02890e-19 | 1.000000 | 2.02890e-19 | 1.000000 |
| rad31                         | 9.47008e-20 | 1.000000 | 9.47008e-20 | 1.000000 |
| PhcycC3H3_B+H                 | 1.49179e-20 | 1.000000 | 1.49179e-20 | 1.000000 |
| rad24                         | 1.42128e-20 | 1.000000 | 1.42128e-20 | 1.000000 |
| rad53                         | 2.55641e-24 | 1.000000 | 2.55641e-24 | 1.000000 |
| rad47                         | 1.24984e-25 | 1.000000 | 1.24984e-25 | 1.000000 |
| rad64                         | 3.82628e-26 | 1.000000 | 3.82628e-26 | 1.000000 |
| Benzene+cycloprop-1-enylidene | 1.09842e-27 | 1.000000 | 1.09842e-27 | 1.000000 |
| rad61                         | 3.56154e-32 | 1.000000 | 3.56154e-32 | 1.000000 |
| rad56                         | 4.01952e-33 | 1.000000 | 4.01952e-33 | 1.000000 |
| rad68syn                      | 6.40678e-35 | 1.000000 | 6.40678e-35 | 1.000000 |
| rad68anti                     | 5.34376e-35 | 1.000000 | 5.34376e-35 | 1.000000 |
| rad19syn                      | 1.80509e-39 | 1.000000 | 1.80509e-39 | 1.000000 |
| rad73                         | 4.60119e-42 | 1.000000 | 4.60119e-42 | 1.000000 |
| rad40syn                      | 5.12641e-43 | 1.000000 | 5.12641e-43 | 1.000000 |
| rad40anti                     | 3.86268e-43 | 1.000000 | 3.86268e-43 | 1.000000 |
| PAH8+H                        | 1.34893e-46 | 1.000000 | 1.34893e-46 | 1.000000 |
| rad71                         | 1.41020e-49 | 1.000000 | 1.41020e-49 | 1.000000 |
| rad8                          | 1.26502e-56 | 1.000000 | 1.26502e-56 | 1.000000 |

1.00000000 Pa, 70.0000000 K

| Rate constant             | True (fraction)        | Effective (fraction)   |
|---------------------------|------------------------|------------------------|
| Total                     | 1.91520e-16 (1.00 )    | 1.91520e-16 (1.00 )    |
| Formation of rad19        | 1.91520e-16 (1.000 )   | 1.91520e-16 (1.000 )   |
| H-abstraction to cyc2enyl | 1.01125e-28 (5.28e-13) | 1.01125e-28 (5.28e-13) |
| H-abstraction to cyclenyl | 1.97822e-39 (1.03e-23) | 1.97822e-39 (1.03e-23) |

| species                       | PYtrue      | Cumul    | PYeffective | Cumul    |
|-------------------------------|-------------|----------|-------------|----------|
| Indene+H                      | 0.999754    | 0.999754 | 0.999754    | 0.999754 |
| PhCHCCH2+H                    | 0.000231618 | 0.999986 | 0.000231618 | 0.999986 |
| rad6                          | 3.74971e-06 | 0.999989 | 3.74971e-06 | 0.999989 |
| PhCCH+CH3                     | 3.67648e-06 | 0.999993 | 3.67648e-06 | 0.999993 |
| PhCCCH3+H                     | 2.22623e-06 | 0.999995 | 2.22623e-06 | 0.999995 |
| C2H2+PhCH2                    | 2.19139e-06 | 0.999997 | 2.19139e-06 | 0.999997 |
| Ph+MeAc                       | 1.65260e-06 | 0.999999 | 1.65260e-06 | 0.999999 |
| rad67                         | 5.16735e-07 | 1.000000 | 5.16735e-07 | 1.000000 |
| rad35                         | 2.27957e-07 | 1.000000 | 2.27957e-07 | 1.000000 |
| Ph+Allene                     | 8.35023e-08 | 1.000000 | 8.35023e-08 | 1.000000 |
| PAH7+H                        | 1.03077e-08 | 1.000000 | 1.03077e-08 | 1.000000 |
| PhCH2CCH+H                    | 1.02444e-08 | 1.000000 | 1.02444e-08 | 1.000000 |
| rad37                         | 5.08250e-09 | 1.000000 | 5.08250e-09 | 1.000000 |
| rad28                         | 4.74863e-09 | 1.000000 | 4.74863e-09 | 1.000000 |
| rad30                         | 4.14287e-09 | 1.000000 | 4.14287e-09 | 1.000000 |
| rad2                          | 4.09087e-09 | 1.000000 | 4.09087e-09 | 1.000000 |
| rad39                         | 2.89185e-09 | 1.000000 | 2.89185e-09 | 1.000000 |
| rad7                          | 6.36725e-10 | 1.000000 | 6.36725e-10 | 1.000000 |
| rad9                          | 6.28831e-10 | 1.000000 | 6.28831e-10 | 1.000000 |
| rad26                         | 5.00052e-10 | 1.000000 | 5.00052e-10 | 1.000000 |
| rad10                         | 2.95367e-10 | 1.000000 | 2.95367e-10 | 1.000000 |
| rad1                          | 2.60384e-10 | 1.000000 | 2.60384e-10 | 1.000000 |
| rad11                         | 2.00843e-10 | 1.000000 | 2.00843e-10 | 1.000000 |
| PAH9+H                        | 1.95529e-10 | 1.000000 | 1.95529e-10 | 1.000000 |
| rad38                         | 8.69363e-11 | 1.000000 | 8.69363e-11 | 1.000000 |
| rad23                         | 4.47007e-11 | 1.000000 | 4.47007e-11 | 1.000000 |
| rad3                          | 4.05314e-11 | 1.000000 | 4.05314e-11 | 1.000000 |
| rad4                          | 2.05049e-11 | 1.000000 | 2.05049e-11 | 1.000000 |
| rad60syn                      | 1.85188e-11 | 1.000000 | 1.85188e-11 | 1.000000 |
| rad60anti                     | 9.06675e-12 | 1.000000 | 9.06675e-12 | 1.000000 |
| PAH3+H                        | 7.67027e-12 | 1.000000 | 7.67027e-12 | 1.000000 |
| PAH10+CH3                     | 6.72871e-12 | 1.000000 | 6.72871e-12 | 1.000000 |
| rad46                         | 4.84050e-12 | 1.000000 | 4.84050e-12 | 1.000000 |
| rad13                         | 1.96295e-12 | 1.000000 | 1.96295e-12 | 1.000000 |
| rad59                         | 1.58120e-12 | 1.000000 | 1.58120e-12 | 1.000000 |
| rad45                         | 1.24063e-12 | 1.000000 | 1.24063e-12 | 1.000000 |
| PhcycC3H3_A+H                 | 8.27811e-13 | 1.000000 | 8.27811e-13 | 1.000000 |
| Benzene+cycloprop-2-enylidene | 5.28015e-13 | 1.000000 | 5.28015e-13 | 1.000000 |
| rad15                         | 4.03453e-13 | 1.000000 | 4.03453e-13 | 1.000000 |
| rad43                         | 3.04387e-13 | 1.000000 | 3.04387e-13 | 1.000000 |

|                               |             |          |             |          |
|-------------------------------|-------------|----------|-------------|----------|
| rad54                         | 1.02125e-13 | 1.000000 | 1.02125e-13 | 1.000000 |
| rad22                         | 7.96641e-14 | 1.000000 | 7.96641e-14 | 1.000000 |
| rad36                         | 7.59668e-14 | 1.000000 | 7.59668e-14 | 1.000000 |
| rad62                         | 5.88442e-14 | 1.000000 | 5.88442e-14 | 1.000000 |
| rad50                         | 3.14422e-14 | 1.000000 | 3.14422e-14 | 1.000000 |
| rad14                         | 3.62021e-15 | 1.000000 | 3.62021e-15 | 1.000000 |
| rad33                         | 2.95059e-15 | 1.000000 | 2.95059e-15 | 1.000000 |
| rad27                         | 2.87294e-15 | 1.000000 | 2.87294e-15 | 1.000000 |
| rad70                         | 1.89972e-15 | 1.000000 | 1.89972e-15 | 1.000000 |
| rad25                         | 1.39652e-15 | 1.000000 | 1.39652e-15 | 1.000000 |
| Phenyl+cycC3H4                | 7.87809e-16 | 1.000000 | 0.00000     | 1.000000 |
| rad55                         | 6.75349e-16 | 1.000000 | 6.75349e-16 | 1.000000 |
| PAH1+H                        | 5.01235e-16 | 1.000000 | 5.01235e-16 | 1.000000 |
| rad52                         | 2.01383e-16 | 1.000000 | 2.01383e-16 | 1.000000 |
| rad58                         | 1.02708e-16 | 1.000000 | 1.02708e-16 | 1.000000 |
| rad51                         | 5.03484e-17 | 1.000000 | 5.03484e-17 | 1.000000 |
| rad34                         | 1.91453e-17 | 1.000000 | 1.91453e-17 | 1.000000 |
| rad41                         | 5.24528e-18 | 1.000000 | 5.24528e-18 | 1.000000 |
| rad42                         | 4.38513e-18 | 1.000000 | 4.38513e-18 | 1.000000 |
| rad12                         | 3.00217e-18 | 1.000000 | 3.00217e-18 | 1.000000 |
| rad5                          | 2.17498e-18 | 1.000000 | 2.17498e-18 | 1.000000 |
| rad65                         | 1.01473e-18 | 1.000000 | 1.01473e-18 | 1.000000 |
| rad18                         | 4.56924e-19 | 1.000000 | 4.56924e-19 | 1.000000 |
| rad19anti                     | 4.12960e-19 | 1.000000 | 4.12960e-19 | 1.000000 |
| PhcycC3H3_B+H                 | 2.38925e-19 | 1.000000 | 2.38925e-19 | 1.000000 |
| rad20                         | 2.11513e-19 | 1.000000 | 2.11513e-19 | 1.000000 |
| rad21                         | 1.37054e-19 | 1.000000 | 1.37054e-19 | 1.000000 |
| rad31                         | 8.13774e-20 | 1.000000 | 8.13774e-20 | 1.000000 |
| rad24                         | 9.71057e-21 | 1.000000 | 9.71057e-21 | 1.000000 |
| Benzene+cycloprop-1-enylidene | 1.03290e-23 | 1.000000 | 1.03290e-23 | 1.000000 |
| rad53                         | 8.56745e-24 | 1.000000 | 8.56745e-24 | 1.000000 |
| rad64                         | 1.30313e-25 | 1.000000 | 1.30313e-25 | 1.000000 |
| rad47                         | 1.14712e-25 | 1.000000 | 1.14712e-25 | 1.000000 |
| rad61                         | 2.50176e-31 | 1.000000 | 2.50176e-31 | 1.000000 |
| rad56                         | 1.26833e-32 | 1.000000 | 1.26833e-32 | 1.000000 |
| rad68syn                      | 1.97638e-34 | 1.000000 | 1.97638e-34 | 1.000000 |
| rad68anti                     | 1.64976e-34 | 1.000000 | 1.64976e-34 | 1.000000 |
| rad19syn                      | 3.07657e-39 | 1.000000 | 3.07657e-39 | 1.000000 |
| rad73                         | 1.31222e-41 | 1.000000 | 1.31222e-41 | 1.000000 |
| rad40syn                      | 1.43446e-42 | 1.000000 | 1.43446e-42 | 1.000000 |
| rad40anti                     | 1.08707e-42 | 1.000000 | 1.08707e-42 | 1.000000 |
| PAH8+H                        | 3.45439e-46 | 1.000000 | 3.45439e-46 | 1.000000 |
| rad71                         | 3.56222e-49 | 1.000000 | 3.56222e-49 | 1.000000 |
| rad8                          | 1.32547e-56 | 1.000000 | 1.32547e-56 | 1.000000 |

1.00000000 Pa, 80.0000000 K

| Rate constant             | True (fraction)        | Effective (fraction)   |
|---------------------------|------------------------|------------------------|
| Total                     | 4.17084e-16 (1.00)     | 4.17084e-16 (1.00)     |
| Formation of rad19        | 4.17084e-16 (1.000)    | 4.17084e-16 (1.000)    |
| H-abstraction to cyc2enyl | 8.98751e-27 (2.15e-11) | 8.98751e-27 (2.15e-11) |
| H-abstraction to cyclenyl | 4.00120e-36 (9.59e-21) | 4.00120e-36 (9.59e-21) |

| species    | PYtrue      | Cumul    | PYeffective | Cumul    |
|------------|-------------|----------|-------------|----------|
| Indene+H   | 0.999748    | 0.999748 | 0.999748    | 0.999748 |
| PhCHCCH2+H | 0.000237305 | 0.999985 | 0.000237305 | 0.999985 |
| PhCCH+CH3  | 3.82284e-06 | 0.999989 | 3.82284e-06 | 0.999989 |
| rad6       | 3.18279e-06 | 0.999992 | 3.18279e-06 | 0.999992 |
| C2H2+PhCH2 | 2.35533e-06 | 0.999995 | 2.35533e-06 | 0.999995 |
| PhCCCH3+H  | 2.30056e-06 | 0.999997 | 2.30056e-06 | 0.999997 |
| Ph+MeAc    | 1.71967e-06 | 0.999999 | 1.71967e-06 | 0.999999 |
| rad67      | 5.34144e-07 | 0.999999 | 5.34144e-07 | 0.999999 |
| rad35      | 2.35325e-07 | 0.999999 | 2.35325e-07 | 0.999999 |
| Ph+Allene  | 9.45550e-08 | 1.000000 | 9.45550e-08 | 1.000000 |
| PAH7+H     | 1.17959e-08 | 1.000000 | 1.17959e-08 | 1.000000 |
| PhCH2CCH+H | 1.16413e-08 | 1.000000 | 1.16413e-08 | 1.000000 |
| rad37      | 5.32047e-09 | 1.000000 | 5.32047e-09 | 1.000000 |
| rad30      | 4.29491e-09 | 1.000000 | 4.29491e-09 | 1.000000 |
| rad28      | 3.98185e-09 | 1.000000 | 3.98185e-09 | 1.000000 |
| rad2       | 3.47544e-09 | 1.000000 | 3.47544e-09 | 1.000000 |
| rad39      | 3.31184e-09 | 1.000000 | 3.31184e-09 | 1.000000 |
| rad7       | 5.28361e-10 | 1.000000 | 5.28361e-10 | 1.000000 |
| rad26      | 4.24274e-10 | 1.000000 | 4.24274e-10 | 1.000000 |
| rad10      | 2.48758e-10 | 1.000000 | 2.48758e-10 | 1.000000 |
| rad1       | 2.21796e-10 | 1.000000 | 2.21796e-10 | 1.000000 |
| rad9       | 2.16268e-10 | 1.000000 | 2.16268e-10 | 1.000000 |
| PAH9+H     | 2.13655e-10 | 1.000000 | 2.13655e-10 | 1.000000 |
| rad11      | 1.65351e-10 | 1.000000 | 1.65351e-10 | 1.000000 |

|                               |             |          |             |          |
|-------------------------------|-------------|----------|-------------|----------|
| rad38                         | 9.48156e-11 | 1.000000 | 9.48156e-11 | 1.000000 |
| rad3                          | 3.38841e-11 | 1.000000 | 3.38841e-11 | 1.000000 |
| rad23                         | 3.23357e-11 | 1.000000 | 3.23357e-11 | 1.000000 |
| Benzene+cycloprop-2-enylidene | 2.15484e-11 | 1.000000 | 2.15484e-11 | 1.000000 |
| rad60syn                      | 1.94389e-11 | 1.000000 | 1.94389e-11 | 1.000000 |
| rad4                          | 1.71524e-11 | 1.000000 | 1.71524e-11 | 1.000000 |
| rad60anti                     | 9.52779e-12 | 1.000000 | 9.52779e-12 | 1.000000 |
| PAH3+H                        | 8.17654e-12 | 1.000000 | 8.17654e-12 | 1.000000 |
| PAH10+CH3                     | 7.38206e-12 | 1.000000 | 7.38206e-12 | 1.000000 |
| rad46                         | 5.33517e-12 | 1.000000 | 5.33517e-12 | 1.000000 |
| rad59                         | 1.68169e-12 | 1.000000 | 1.68169e-12 | 1.000000 |
| rad13                         | 1.63705e-12 | 1.000000 | 1.63705e-12 | 1.000000 |
| PhcycC3H3_A+H                 | 1.00317e-12 | 1.000000 | 1.00317e-12 | 1.000000 |
| rad45                         | 8.72215e-13 | 1.000000 | 8.72215e-13 | 1.000000 |
| rad43                         | 3.30355e-13 | 1.000000 | 3.30355e-13 | 1.000000 |
| rad15                         | 1.36748e-13 | 1.000000 | 1.36748e-13 | 1.000000 |
| rad54                         | 1.23654e-13 | 1.000000 | 1.23654e-13 | 1.000000 |
| rad62                         | 6.45447e-14 | 1.000000 | 6.45447e-14 | 1.000000 |
| rad22                         | 5.40293e-14 | 1.000000 | 5.40293e-14 | 1.000000 |
| rad36                         | 5.33977e-14 | 1.000000 | 5.33977e-14 | 1.000000 |
| rad50                         | 3.54677e-14 | 1.000000 | 3.54677e-14 | 1.000000 |
| rad14                         | 2.99547e-15 | 1.000000 | 2.99547e-15 | 1.000000 |
| rad33                         | 2.49954e-15 | 1.000000 | 2.49954e-15 | 1.000000 |
| rad27                         | 2.40459e-15 | 1.000000 | 2.40459e-15 | 1.000000 |
| rad70                         | 2.30290e-15 | 1.000000 | 2.30290e-15 | 1.000000 |
| Phenyl+cycC3H4                | 1.32430e-15 | 1.000000 | 0.00000     | 1.000000 |
| rad25                         | 1.15891e-15 | 1.000000 | 1.15891e-15 | 1.000000 |
| rad55                         | 8.45489e-16 | 1.000000 | 8.45489e-16 | 1.000000 |
| PAH1+H                        | 6.14139e-16 | 1.000000 | 6.14139e-16 | 1.000000 |
| rad52                         | 2.31084e-16 | 1.000000 | 2.31084e-16 | 1.000000 |
| rad58                         | 1.16184e-16 | 1.000000 | 1.16184e-16 | 1.000000 |
| rad51                         | 5.89774e-17 | 1.000000 | 5.89774e-17 | 1.000000 |
| rad34                         | 2.43365e-17 | 1.000000 | 2.43365e-17 | 1.000000 |
| rad41                         | 6.56223e-18 | 1.000000 | 6.56223e-18 | 1.000000 |
| rad42                         | 5.37009e-18 | 1.000000 | 5.37009e-18 | 1.000000 |
| PhcycC3H3_B+H                 | 1.96248e-18 | 1.000000 | 1.96248e-18 | 1.000000 |
| rad5                          | 1.39235e-18 | 1.000000 | 1.39235e-18 | 1.000000 |
| rad65                         | 1.20033e-18 | 1.000000 | 1.20033e-18 | 1.000000 |
| rad12                         | 1.03758e-18 | 1.000000 | 1.03758e-18 | 1.000000 |
| rad18                         | 2.82869e-19 | 1.000000 | 2.82869e-19 | 1.000000 |
| rad20                         | 1.50660e-19 | 1.000000 | 1.50660e-19 | 1.000000 |
| rad19anti                     | 1.40740e-19 | 1.000000 | 1.40740e-19 | 1.000000 |
| rad21                         | 9.79386e-20 | 1.000000 | 9.79386e-20 | 1.000000 |
| rad31                         | 7.02298e-20 | 1.000000 | 7.02298e-20 | 1.000000 |
| Benzene+cycloprop-1-enylidene | 9.59328e-21 | 1.000000 | 9.59328e-21 | 1.000000 |
| rad24                         | 6.88202e-21 | 1.000000 | 6.88202e-21 | 1.000000 |
| rad53                         | 3.35368e-23 | 1.000000 | 3.35368e-23 | 1.000000 |
| rad64                         | 6.17823e-25 | 1.000000 | 6.17823e-25 | 1.000000 |
| rad47                         | 1.06884e-25 | 1.000000 | 1.06884e-25 | 1.000000 |
| rad61                         | 1.05803e-29 | 1.000000 | 1.05803e-29 | 1.000000 |
| rad56                         | 8.79720e-32 | 1.000000 | 8.79720e-32 | 1.000000 |
| rad68syn                      | 1.42090e-33 | 1.000000 | 1.42090e-33 | 1.000000 |
| rad68anti                     | 1.18606e-33 | 1.000000 | 1.18606e-33 | 1.000000 |
| rad19syn                      | 5.56522e-39 | 1.000000 | 5.56522e-39 | 1.000000 |
| rad73                         | 8.70905e-41 | 1.000000 | 8.70905e-41 | 1.000000 |
| rad40syn                      | 1.12930e-41 | 1.000000 | 1.12930e-41 | 1.000000 |
| rad40anti                     | 8.69852e-42 | 1.000000 | 8.69852e-42 | 1.000000 |
| PAH8+H                        | 2.29557e-45 | 1.000000 | 2.29557e-45 | 1.000000 |
| rad71                         | 2.21843e-48 | 1.000000 | 2.21843e-48 | 1.000000 |
| rad8                          | 1.45552e-56 | 1.000000 | 1.45552e-56 | 1.000000 |

1.00000000 Pa, 90.0000000 K

=====

| Rate constant             | True (fraction)        | Effective (fraction)   |
|---------------------------|------------------------|------------------------|
| Total                     | 7.74016e-16 (1.00 )    | 7.74016e-16 (1.00 )    |
| Formation of rad19        | 7.74016e-16 (1.000 )   | 7.74016e-16 (1.000 )   |
| H-abstraction to cyc2enyl | 2.91736e-25 (3.77e-10) | 2.91736e-25 (3.77e-10) |
| H-abstraction to cyclenyl | 1.47814e-33 (1.91e-18) | 1.47814e-33 (1.91e-18) |

| species    | PYtrue      | Cumul    | PYeffective | Cumul    |
|------------|-------------|----------|-------------|----------|
| Indene+H   | 0.999742    | 0.999742 | 0.999742    | 0.999742 |
| PhCHCCH2+H | 0.000243276 | 0.999985 | 0.000243276 | 0.999985 |
| PhCCH+CH3  | 3.96933e-06 | 0.999989 | 3.96933e-06 | 0.999989 |
| rad6       | 2.70443e-06 | 0.999992 | 2.70443e-06 | 0.999992 |
| C2H2+PhCH2 | 2.51548e-06 | 0.999994 | 2.51548e-06 | 0.999994 |
| PhCCCH3+H  | 2.37736e-06 | 0.999997 | 2.37736e-06 | 0.999997 |
| Ph+MeAc    | 1.78973e-06 | 0.999999 | 1.78973e-06 | 0.999999 |
| rad67      | 5.52633e-07 | 0.999999 | 5.52633e-07 | 0.999999 |

|                               |             |          |             |          |
|-------------------------------|-------------|----------|-------------|----------|
| rad35                         | 2.43137e-07 | 0.999999 | 2.43137e-07 | 0.999999 |
| Ph+Allene                     | 1.05776e-07 | 1.000000 | 1.05776e-07 | 1.000000 |
| PAH7+H                        | 1.32644e-08 | 1.000000 | 1.32644e-08 | 1.000000 |
| PhCH2CCH+H                    | 1.30931e-08 | 1.000000 | 1.30931e-08 | 1.000000 |
| rad37                         | 5.57246e-09 | 1.000000 | 5.57246e-09 | 1.000000 |
| rad30                         | 4.45444e-09 | 1.000000 | 4.45444e-09 | 1.000000 |
| rad39                         | 3.72655e-09 | 1.000000 | 3.72655e-09 | 1.000000 |
| rad28                         | 3.34814e-09 | 1.000000 | 3.34814e-09 | 1.000000 |
| rad2                          | 2.95397e-09 | 1.000000 | 2.95397e-09 | 1.000000 |
| rad7                          | 4.40469e-10 | 1.000000 | 4.40469e-10 | 1.000000 |
| Benzene+cycloprop-2-enylidene | 3.76912e-10 | 1.000000 | 3.76912e-10 | 1.000000 |
| rad26                         | 3.61656e-10 | 1.000000 | 3.61656e-10 | 1.000000 |
| PAH9+H                        | 2.32008e-10 | 1.000000 | 2.32008e-10 | 1.000000 |
| rad10                         | 2.09891e-10 | 1.000000 | 2.09891e-10 | 1.000000 |
| rad1                          | 1.89069e-10 | 1.000000 | 1.89069e-10 | 1.000000 |
| rad11                         | 1.36936e-10 | 1.000000 | 1.36936e-10 | 1.000000 |
| rad38                         | 1.02900e-10 | 1.000000 | 1.02900e-10 | 1.000000 |
| rad9                          | 8.69173e-11 | 1.000000 | 8.69173e-11 | 1.000000 |
| rad3                          | 2.84167e-11 | 1.000000 | 2.84167e-11 | 1.000000 |
| rad23                         | 2.39109e-11 | 1.000000 | 2.39109e-11 | 1.000000 |
| rad60syn                      | 2.04263e-11 | 1.000000 | 2.04263e-11 | 1.000000 |
| rad4                          | 1.43948e-11 | 1.000000 | 1.43948e-11 | 1.000000 |
| rad60anti                     | 1.00234e-11 | 1.000000 | 1.00234e-11 | 1.000000 |
| PAH3+H                        | 8.73263e-12 | 1.000000 | 8.73263e-12 | 1.000000 |
| PAH10+CH3                     | 8.11269e-12 | 1.000000 | 8.11269e-12 | 1.000000 |
| rad46                         | 5.84730e-12 | 1.000000 | 5.84730e-12 | 1.000000 |
| rad59                         | 1.79169e-12 | 1.000000 | 1.79169e-12 | 1.000000 |
| rad13                         | 1.37152e-12 | 1.000000 | 1.37152e-12 | 1.000000 |
| PhcycC3H3_A+H                 | 1.22461e-12 | 1.000000 | 1.22461e-12 | 1.000000 |
| rad45                         | 6.29674e-13 | 1.000000 | 6.29674e-13 | 1.000000 |
| rad43                         | 3.59180e-13 | 1.000000 | 3.59180e-13 | 1.000000 |
| rad54                         | 1.47652e-13 | 1.000000 | 1.47652e-13 | 1.000000 |
| rad62                         | 7.08772e-14 | 1.000000 | 7.08772e-14 | 1.000000 |
| rad15                         | 5.42894e-14 | 1.000000 | 5.42894e-14 | 1.000000 |
| rad50                         | 3.98628e-14 | 1.000000 | 3.98628e-14 | 1.000000 |
| rad36                         | 3.85474e-14 | 1.000000 | 3.85474e-14 | 1.000000 |
| rad22                         | 3.78335e-14 | 1.000000 | 3.78335e-14 | 1.000000 |
| rad70                         | 2.77490e-15 | 1.000000 | 2.77490e-15 | 1.000000 |
| rad14                         | 2.49178e-15 | 1.000000 | 2.49178e-15 | 1.000000 |
| Phenyl+cycC3H4                | 2.14284e-15 | 1.000000 | 0.00000     | 1.000000 |
| rad33                         | 2.12260e-15 | 1.000000 | 2.12260e-15 | 1.000000 |
| rad27                         | 2.01976e-15 | 1.000000 | 2.01976e-15 | 1.000000 |
| rad55                         | 1.04511e-15 | 1.000000 | 1.04511e-15 | 1.000000 |
| rad25                         | 9.67270e-16 | 1.000000 | 9.67270e-16 | 1.000000 |
| PAH1+H                        | 7.52963e-16 | 1.000000 | 7.52963e-16 | 1.000000 |
| rad52                         | 2.64577e-16 | 1.000000 | 2.64577e-16 | 1.000000 |
| rad58                         | 1.32104e-16 | 1.000000 | 1.32104e-16 | 1.000000 |
| rad51                         | 6.90470e-17 | 1.000000 | 6.90470e-17 | 1.000000 |
| rad34                         | 3.08329e-17 | 1.000000 | 3.08329e-17 | 1.000000 |
| PhcycC3H3_B+H                 | 1.04006e-17 | 1.000000 | 1.04006e-17 | 1.000000 |
| rad41                         | 8.23694e-18 | 1.000000 | 8.23694e-18 | 1.000000 |
| rad42                         | 6.60723e-18 | 1.000000 | 6.60723e-18 | 1.000000 |
| Benzene+cycloprop-1-enylidene | 1.90970e-18 | 1.000000 | 1.90970e-18 | 1.000000 |
| rad65                         | 1.42024e-18 | 1.000000 | 1.42024e-18 | 1.000000 |
| rad5                          | 9.27112e-19 | 1.000000 | 9.27112e-19 | 1.000000 |
| rad12                         | 4.19269e-19 | 1.000000 | 4.19269e-19 | 1.000000 |
| rad18                         | 1.85211e-19 | 1.000000 | 1.85211e-19 | 1.000000 |
| rad20                         | 1.11724e-19 | 1.000000 | 1.11724e-19 | 1.000000 |
| rad21                         | 7.28461e-20 | 1.000000 | 7.28461e-20 | 1.000000 |
| rad31                         | 6.08022e-20 | 1.000000 | 6.08022e-20 | 1.000000 |
| rad19anti                     | 5.62390e-20 | 1.000000 | 5.62390e-20 | 1.000000 |
| rad24                         | 5.00897e-21 | 1.000000 | 5.00897e-21 | 1.000000 |
| rad53                         | 1.26350e-22 | 1.000000 | 1.26350e-22 | 1.000000 |
| rad64                         | 3.25686e-24 | 1.000000 | 3.25686e-24 | 1.000000 |
| rad47                         | 1.00716e-25 | 1.000000 | 1.00716e-25 | 1.000000 |
| rad61                         | 4.25650e-28 | 1.000000 | 4.25650e-28 | 1.000000 |
| rad56                         | 1.88777e-30 | 1.000000 | 1.88777e-30 | 1.000000 |
| rad68syn                      | 4.19446e-32 | 1.000000 | 4.19446e-32 | 1.000000 |
| rad68anti                     | 3.47579e-32 | 1.000000 | 3.47579e-32 | 1.000000 |
| rad19syn                      | 1.05531e-38 | 1.000000 | 1.05531e-38 | 1.000000 |
| rad73                         | 4.19094e-39 | 1.000000 | 4.19094e-39 | 1.000000 |
| rad40syn                      | 7.34855e-40 | 1.000000 | 7.34855e-40 | 1.000000 |
| rad40anti                     | 5.81477e-40 | 1.000000 | 5.81477e-40 | 1.000000 |
| PAH8+H                        | 1.11075e-43 | 1.000000 | 1.11075e-43 | 1.000000 |
| rad71                         | 8.25133e-47 | 1.000000 | 8.25133e-47 | 1.000000 |
| rad8                          | 1.65526e-56 | 1.000000 | 1.65526e-56 | 1.000000 |

1.00000000 Pa, 100.000000 K

=====

Rate constant | True (fraction) Effective (fraction)

```

-----
Total | 1.28255e-15 (1.00 ) 1.28255e-15 (1.00 )
Formation of rad19 | 1.28255e-15 (1.000 ) 1.28255e-15 (1.000 )
H-abstraction to cyc2enyl | 4.68359e-24 (3.65e-09) 4.68359e-24 (3.65e-09)
H-abstraction to cyclenyl | 1.66242e-31 (1.30e-16) 1.66242e-31 (1.30e-16)

```

| species                       | PYtrue      | Cumul    | PYeffective | Cumul    |
|-------------------------------|-------------|----------|-------------|----------|
| Indene+H                      | 0.999736    | 0.999736 | 0.999736    | 0.999736 |
| PhCHCCH2+H                    | 0.000249579 | 0.999986 | 0.000249579 | 0.999986 |
| PhCCH+CH3                     | 4.11771e-06 | 0.999990 | 4.11771e-06 | 0.999990 |
| C2H2+PhCH2                    | 2.67423e-06 | 0.999992 | 2.67423e-06 | 0.999992 |
| PhCCCH3+H                     | 2.45744e-06 | 0.999995 | 2.45744e-06 | 0.999995 |
| rad6                          | 2.29896e-06 | 0.999997 | 2.29896e-06 | 0.999997 |
| Ph+MeAc                       | 1.86356e-06 | 0.999999 | 1.86356e-06 | 0.999999 |
| rad67                         | 5.72373e-07 | 1.000000 | 5.72373e-07 | 1.000000 |
| rad35                         | 2.51464e-07 | 1.000000 | 2.51464e-07 | 1.000000 |
| Ph+Allene                     | 1.17323e-07 | 1.000000 | 1.17323e-07 | 1.000000 |
| PAH7+H                        | 1.47345e-08 | 1.000000 | 1.47345e-08 | 1.000000 |
| PhCH2CCH+H                    | 1.46212e-08 | 1.000000 | 1.46212e-08 | 1.000000 |
| rad37                         | 5.84202e-09 | 1.000000 | 5.84202e-09 | 1.000000 |
| rad30                         | 4.62307e-09 | 1.000000 | 4.62307e-09 | 1.000000 |
| rad39                         | 4.14195e-09 | 1.000000 | 4.14195e-09 | 1.000000 |
| Benzene+cycloprop-2-enylidene | 3.65179e-09 | 1.000000 | 3.65179e-09 | 1.000000 |
| rad28                         | 2.82027e-09 | 1.000000 | 2.82027e-09 | 1.000000 |
| rad2                          | 2.51060e-09 | 1.000000 | 2.51060e-09 | 1.000000 |
| rad7                          | 3.68334e-10 | 1.000000 | 3.68334e-10 | 1.000000 |
| rad26                         | 3.08700e-10 | 1.000000 | 3.08700e-10 | 1.000000 |
| PAH9+H                        | 2.50848e-10 | 1.000000 | 2.50848e-10 | 1.000000 |
| rad10                         | 1.77272e-10 | 1.000000 | 1.77272e-10 | 1.000000 |
| rad1                          | 1.61210e-10 | 1.000000 | 1.61210e-10 | 1.000000 |
| rad11                         | 1.13863e-10 | 1.000000 | 1.13863e-10 | 1.000000 |
| rad38                         | 1.11310e-10 | 1.000000 | 1.11310e-10 | 1.000000 |
| rad9                          | 3.94106e-11 | 1.000000 | 3.94106e-11 | 1.000000 |
| rad3                          | 2.38785e-11 | 1.000000 | 2.38785e-11 | 1.000000 |
| rad60syn                      | 2.14929e-11 | 1.000000 | 2.14929e-11 | 1.000000 |
| rad23                         | 1.79759e-11 | 1.000000 | 1.79759e-11 | 1.000000 |
| rad4                          | 1.21054e-11 | 1.000000 | 1.21054e-11 | 1.000000 |
| rad60anti                     | 1.05597e-11 | 1.000000 | 1.05597e-11 | 1.000000 |
| PAH3+H                        | 9.34740e-12 | 1.000000 | 9.34740e-12 | 1.000000 |
| PAH10+CH3                     | 8.93896e-12 | 1.000000 | 8.93896e-12 | 1.000000 |
| rad46                         | 6.38434e-12 | 1.000000 | 6.38434e-12 | 1.000000 |
| rad59                         | 1.91286e-12 | 1.000000 | 1.91286e-12 | 1.000000 |
| PhcycC3H3_A+H                 | 1.50519e-12 | 1.000000 | 1.50519e-12 | 1.000000 |
| rad13                         | 1.15254e-12 | 1.000000 | 1.15254e-12 | 1.000000 |
| rad45                         | 4.63730e-13 | 1.000000 | 4.63730e-13 | 1.000000 |
| rad43                         | 3.91447e-13 | 1.000000 | 3.91447e-13 | 1.000000 |
| rad54                         | 1.74715e-13 | 1.000000 | 1.74715e-13 | 1.000000 |
| rad62                         | 7.79725e-14 | 1.000000 | 7.79725e-14 | 1.000000 |
| rad50                         | 4.47163e-14 | 1.000000 | 4.47163e-14 | 1.000000 |
| rad36                         | 2.83921e-14 | 1.000000 | 2.83921e-14 | 1.000000 |
| rad22                         | 2.71415e-14 | 1.000000 | 2.71415e-14 | 1.000000 |
| rad15                         | 2.43589e-14 | 1.000000 | 2.43589e-14 | 1.000000 |
| Phenyl+cycC3H4                | 3.36905e-15 | 1.000000 | 0.00000     | 1.000000 |
| rad70                         | 3.33310e-15 | 1.000000 | 3.33310e-15 | 1.000000 |
| rad14                         | 2.08017e-15 | 1.000000 | 2.08017e-15 | 1.000000 |
| rad33                         | 1.80509e-15 | 1.000000 | 1.80509e-15 | 1.000000 |
| rad27                         | 1.70030e-15 | 1.000000 | 1.70030e-15 | 1.000000 |
| rad55                         | 1.28183e-15 | 1.000000 | 1.28183e-15 | 1.000000 |
| PAH1+H                        | 9.25489e-16 | 1.000000 | 9.25489e-16 | 1.000000 |
| rad25                         | 8.10446e-16 | 1.000000 | 8.10446e-16 | 1.000000 |
| rad52                         | 3.02761e-16 | 1.000000 | 3.02761e-16 | 1.000000 |
| rad58                         | 1.51055e-16 | 1.000000 | 1.51055e-16 | 1.000000 |
| Benzene+cycloprop-1-enylidene | 1.29619e-16 | 1.000000 | 1.29619e-16 | 1.000000 |
| rad51                         | 8.09260e-17 | 1.000000 | 8.09260e-17 | 1.000000 |
| PhcycC3H3_B+H                 | 4.09067e-17 | 1.000000 | 4.09067e-17 | 1.000000 |
| rad34                         | 3.90384e-17 | 1.000000 | 3.90384e-17 | 1.000000 |
| rad41                         | 1.03838e-17 | 1.000000 | 1.03838e-17 | 1.000000 |
| rad42                         | 8.17198e-18 | 1.000000 | 8.17198e-18 | 1.000000 |
| rad65                         | 1.68361e-18 | 1.000000 | 1.68361e-18 | 1.000000 |
| rad5                          | 6.36165e-19 | 1.000000 | 6.36165e-19 | 1.000000 |
| rad12                         | 1.91230e-19 | 1.000000 | 1.91230e-19 | 1.000000 |
| rad18                         | 1.26473e-19 | 1.000000 | 1.26473e-19 | 1.000000 |
| rad20                         | 8.53643e-20 | 1.000000 | 8.53643e-20 | 1.000000 |
| rad21                         | 5.58184e-20 | 1.000000 | 5.58184e-20 | 1.000000 |
| rad31                         | 5.27741e-20 | 1.000000 | 5.27741e-20 | 1.000000 |
| rad19anti                     | 2.54190e-20 | 1.000000 | 2.54190e-20 | 1.000000 |
| rad24                         | 3.71951e-21 | 1.000000 | 3.71951e-21 | 1.000000 |
| rad53                         | 4.18411e-22 | 1.000000 | 4.18411e-22 | 1.000000 |
| rad64                         | 1.54524e-23 | 1.000000 | 1.54524e-23 | 1.000000 |

|           |             |          |             |          |
|-----------|-------------|----------|-------------|----------|
| rad47     | 9.57758e-26 | 1.000000 | 9.57758e-26 | 1.000000 |
| rad61     | 9.08037e-27 | 1.000000 | 9.08037e-27 | 1.000000 |
| rad56     | 4.87391e-29 | 1.000000 | 4.87391e-29 | 1.000000 |
| rad68syn  | 1.55602e-30 | 1.000000 | 1.55602e-30 | 1.000000 |
| rad68anti | 1.27674e-30 | 1.000000 | 1.27674e-30 | 1.000000 |
| rad40syn  | 2.07391e-36 | 1.000000 | 2.07391e-36 | 1.000000 |
| rad40anti | 1.58133e-36 | 1.000000 | 1.58133e-36 | 1.000000 |
| rad73     | 8.00984e-37 | 1.000000 | 8.00984e-37 | 1.000000 |
| rad19syn  | 2.08908e-38 | 1.000000 | 2.08908e-38 | 1.000000 |
| PAH8+H    | 2.98069e-41 | 1.000000 | 2.98069e-41 | 1.000000 |
| rad71     | 1.74357e-44 | 1.000000 | 1.74357e-44 | 1.000000 |
| rad8      | 1.93526e-56 | 1.000000 | 1.93526e-56 | 1.000000 |

1.00000000 Pa, 110.000000 K

```

=====
Rate constant      | True (fraction)      Effective (fraction)
-----
Total              | 1.95524e-15 (1.00   ) 1.95524e-15 (1.00   )
Formation of rad19| 1.95524e-15 (1.000  ) 1.95524e-15 (1.000  )
H-abstraction to cyc2enyl| 4.50936e-23 (2.31e-08) 4.50936e-23 (2.31e-08)
H-abstraction to cyclenyl| 7.87782e-30 (4.03e-15) 7.87782e-30 (4.03e-15)

```

| species                       | PYtrue      | Cumul    | PYeffective | Cumul    |
|-------------------------------|-------------|----------|-------------|----------|
| Indene+H                      | 0.999729    | 0.999729 | 0.999729    | 0.999729 |
| PhCHCCH2+H                    | 0.000256261 | 0.999985 | 0.000256261 | 0.999985 |
| PhCCH+CH3                     | 4.26954e-06 | 0.999990 | 4.26954e-06 | 0.999990 |
| C2H2+PhCH2                    | 2.83370e-06 | 0.999992 | 2.83370e-06 | 0.999992 |
| PhCCCH3+H                     | 2.54157e-06 | 0.999995 | 2.54157e-06 | 0.999995 |
| rad6                          | 1.95411e-06 | 0.999997 | 1.95411e-06 | 0.999997 |
| Ph+MeAc                       | 1.94193e-06 | 0.999999 | 1.94193e-06 | 0.999999 |
| rad67                         | 5.93543e-07 | 0.999999 | 5.93543e-07 | 0.999999 |
| rad35                         | 2.60380e-07 | 1.000000 | 2.60380e-07 | 1.000000 |
| Ph+Allene                     | 1.29353e-07 | 1.000000 | 1.29353e-07 | 1.000000 |
| Benzene+cycloprop-2-enylidene | 2.30629e-08 | 1.000000 | 2.30629e-08 | 1.000000 |
| PhCH2CCH+H                    | 1.62485e-08 | 1.000000 | 1.62485e-08 | 1.000000 |
| PAH7+H                        | 1.62260e-08 | 1.000000 | 1.62260e-08 | 1.000000 |
| rad37                         | 6.13259e-09 | 1.000000 | 6.13259e-09 | 1.000000 |
| rad30                         | 4.80247e-09 | 1.000000 | 4.80247e-09 | 1.000000 |
| rad39                         | 4.56354e-09 | 1.000000 | 4.56354e-09 | 1.000000 |
| rad28                         | 2.37796e-09 | 1.000000 | 2.37796e-09 | 1.000000 |
| rad2                          | 2.13282e-09 | 1.000000 | 2.13282e-09 | 1.000000 |
| rad7                          | 3.08620e-10 | 1.000000 | 3.08620e-10 | 1.000000 |
| PAH9+H                        | 2.70426e-10 | 1.000000 | 2.70426e-10 | 1.000000 |
| rad26                         | 2.63484e-10 | 1.000000 | 2.63484e-10 | 1.000000 |
| rad10                         | 1.49777e-10 | 1.000000 | 1.49777e-10 | 1.000000 |
| rad1                          | 1.37437e-10 | 1.000000 | 1.37437e-10 | 1.000000 |
| rad38                         | 1.20165e-10 | 1.000000 | 1.20165e-10 | 1.000000 |
| rad11                         | 9.49340e-11 | 1.000000 | 9.49340e-11 | 1.000000 |
| rad60syn                      | 2.26519e-11 | 1.000000 | 2.26519e-11 | 1.000000 |
| rad3                          | 2.00875e-11 | 1.000000 | 2.00875e-11 | 1.000000 |
| rad9                          | 1.96777e-11 | 1.000000 | 1.96777e-11 | 1.000000 |
| rad23                         | 1.36869e-11 | 1.000000 | 1.36869e-11 | 1.000000 |
| rad60anti                     | 1.11434e-11 | 1.000000 | 1.11434e-11 | 1.000000 |
| rad4                          | 1.01924e-11 | 1.000000 | 1.01924e-11 | 1.000000 |
| PAH3+H                        | 1.00312e-11 | 1.000000 | 1.00312e-11 | 1.000000 |
| PAH10+CH3                     | 9.88219e-12 | 1.000000 | 9.88219e-12 | 1.000000 |
| rad46                         | 6.95401e-12 | 1.000000 | 6.95401e-12 | 1.000000 |
| rad59                         | 2.04716e-12 | 1.000000 | 2.04716e-12 | 1.000000 |
| PhcycC3H3_A+H                 | 1.86265e-12 | 1.000000 | 1.86265e-12 | 1.000000 |
| rad13                         | 9.70382e-13 | 1.000000 | 9.70382e-13 | 1.000000 |
| rad43                         | 4.27832e-13 | 1.000000 | 4.27832e-13 | 1.000000 |
| rad45                         | 3.46804e-13 | 1.000000 | 3.46804e-13 | 1.000000 |
| rad54                         | 2.05563e-13 | 1.000000 | 2.05563e-13 | 1.000000 |
| rad62                         | 8.59833e-14 | 1.000000 | 8.59833e-14 | 1.000000 |
| rad50                         | 5.01321e-14 | 1.000000 | 5.01321e-14 | 1.000000 |
| rad36                         | 2.12396e-14 | 1.000000 | 2.12396e-14 | 1.000000 |
| rad22                         | 1.98399e-14 | 1.000000 | 1.98399e-14 | 1.000000 |
| rad15                         | 1.20514e-14 | 1.000000 | 1.20514e-14 | 1.000000 |
| Phenyl+cycC3H4                | 5.18630e-15 | 1.000000 | 0.00000     | 1.000000 |
| Benzene+cycloprop-1-enylidene | 4.02908e-15 | 1.000000 | 4.02908e-15 | 1.000000 |
| rad70                         | 3.99970e-15 | 1.000000 | 3.99970e-15 | 1.000000 |
| rad14                         | 1.74059e-15 | 1.000000 | 1.74059e-15 | 1.000000 |
| rad55                         | 1.56536e-15 | 1.000000 | 1.56536e-15 | 1.000000 |
| rad33                         | 1.53610e-15 | 1.000000 | 1.53610e-15 | 1.000000 |
| rad27                         | 1.43326e-15 | 1.000000 | 1.43326e-15 | 1.000000 |
| PAH1+H                        | 1.14210e-15 | 1.000000 | 1.14210e-15 | 1.000000 |
| rad25                         | 6.80762e-16 | 1.000000 | 6.80762e-16 | 1.000000 |
| rad52                         | 3.46745e-16 | 1.000000 | 3.46745e-16 | 1.000000 |
| rad58                         | 1.73799e-16 | 1.000000 | 1.73799e-16 | 1.000000 |



|               |             |          |             |          |
|---------------|-------------|----------|-------------|----------|
| PhcycC3H3_B+H | 1.30381e-16 | 1.000000 | 1.30381e-16 | 1.000000 |
| rad51         | 9.50884e-17 | 1.000000 | 9.50884e-17 | 1.000000 |
| rad34         | 4.94992e-17 | 1.000000 | 4.94992e-17 | 1.000000 |
| rad41         | 1.31604e-17 | 1.000000 | 1.31604e-17 | 1.000000 |
| rad42         | 1.01661e-17 | 1.000000 | 1.01661e-17 | 1.000000 |
| rad65         | 2.00234e-18 | 1.000000 | 2.00234e-18 | 1.000000 |
| rad5          | 4.46951e-19 | 1.000000 | 4.46951e-19 | 1.000000 |
| rad12         | 9.60879e-20 | 1.000000 | 9.60879e-20 | 1.000000 |
| rad18         | 8.92143e-20 | 1.000000 | 8.92143e-20 | 1.000000 |
| rad20         | 6.67344e-20 | 1.000000 | 6.67344e-20 | 1.000000 |
| rad31         | 4.59033e-20 | 1.000000 | 4.59033e-20 | 1.000000 |
| rad21         | 4.37577e-20 | 1.000000 | 4.37577e-20 | 1.000000 |
| rad19anti     | 1.26774e-20 | 1.000000 | 1.26774e-20 | 1.000000 |
| rad24         | 2.80507e-21 | 1.000000 | 2.80507e-21 | 1.000000 |
| rad53         | 1.21050e-21 | 1.000000 | 1.21050e-21 | 1.000000 |
| rad64         | 6.21092e-23 | 1.000000 | 6.21092e-23 | 1.000000 |
| rad61         | 1.14713e-25 | 1.000000 | 1.14713e-25 | 1.000000 |
| rad47         | 9.18125e-26 | 1.000000 | 9.18125e-26 | 1.000000 |
| rad56         | 8.63791e-28 | 1.000000 | 8.63791e-28 | 1.000000 |
| rad68syn      | 3.64252e-29 | 1.000000 | 3.64252e-29 | 1.000000 |
| rad68anti     | 2.96538e-29 | 1.000000 | 2.96538e-29 | 1.000000 |
| rad40syn      | 3.24117e-34 | 1.000000 | 3.24117e-34 | 1.000000 |
| rad40anti     | 2.55069e-34 | 1.000000 | 2.55069e-34 | 1.000000 |
| rad73         | 5.29829e-35 | 1.000000 | 5.29829e-35 | 1.000000 |
| rad19syn      | 4.31566e-38 | 1.000000 | 4.31566e-38 | 1.000000 |
| PAH8+H        | 1.04772e-38 | 1.000000 | 1.04772e-38 | 1.000000 |
| rad71         | 5.77068e-42 | 1.000000 | 5.77068e-42 | 1.000000 |
| rad8          | 2.31514e-56 | 1.000000 | 2.31514e-56 | 1.000000 |

1.00000000 Pa, 120.000000 K

=====

| Rate constant             | True (fraction)        | Effective (fraction)   |
|---------------------------|------------------------|------------------------|
| Total                     | 2.79817e-15 (1.00 )    | 2.79817e-15 (1.00 )    |
| Formation of rad19        | 2.79817e-15 (1.000 )   | 2.79817e-15 (1.000 )   |
| H-abstraction to cyc2enyl | 2.96039e-22 (1.06e-07) | 2.96039e-22 (1.06e-07) |
| H-abstraction to cyclenyl | 1.95323e-28 (6.98e-14) | 1.95323e-28 (6.98e-14) |

| species                       | PYtrue      | Cumul    | PYeffective | Cumul    |
|-------------------------------|-------------|----------|-------------|----------|
| Indene+H                      | 0.999722    | 0.999722 | 0.999722    | 0.999722 |
| PhCHCCH2+H                    | 0.000263375 | 0.999985 | 0.000263375 | 0.999985 |
| PhCCH+CH3                     | 4.42631e-06 | 0.999990 | 4.42631e-06 | 0.999990 |
| C2H2+PhCH2                    | 2.99587e-06 | 0.999993 | 2.99587e-06 | 0.999993 |
| PhCCCH3+H                     | 2.63054e-06 | 0.999995 | 2.63054e-06 | 0.999995 |
| Ph+MeAc                       | 2.02565e-06 | 0.999997 | 2.02565e-06 | 0.999997 |
| rad6                          | 1.66013e-06 | 0.999999 | 1.66013e-06 | 0.999999 |
| rad67                         | 6.16343e-07 | 1.000000 | 6.16343e-07 | 1.000000 |
| rad35                         | 2.69965e-07 | 1.000000 | 2.69965e-07 | 1.000000 |
| Ph+Allene                     | 1.42031e-07 | 1.000000 | 1.42031e-07 | 1.000000 |
| Benzene+cycloprop-2-enylidene | 1.05797e-07 | 1.000000 | 1.05797e-07 | 1.000000 |
| PhCH2CCH+H                    | 1.79998e-08 | 1.000000 | 1.79998e-08 | 1.000000 |
| PAH7+H                        | 1.77581e-08 | 1.000000 | 1.77581e-08 | 1.000000 |
| rad37                         | 6.44788e-09 | 1.000000 | 6.44788e-09 | 1.000000 |
| rad39                         | 4.99671e-09 | 1.000000 | 4.99671e-09 | 1.000000 |
| rad30                         | 4.99441e-09 | 1.000000 | 4.99441e-09 | 1.000000 |
| rad28                         | 2.00570e-09 | 1.000000 | 2.00570e-09 | 1.000000 |
| rad2                          | 1.81044e-09 | 1.000000 | 1.81044e-09 | 1.000000 |
| PAH9+H                        | 2.91002e-10 | 1.000000 | 2.91002e-10 | 1.000000 |
| rad7                          | 2.58876e-10 | 1.000000 | 2.58876e-10 | 1.000000 |
| rad26                         | 2.24712e-10 | 1.000000 | 2.24712e-10 | 1.000000 |
| rad38                         | 1.29592e-10 | 1.000000 | 1.29592e-10 | 1.000000 |
| rad10                         | 1.26527e-10 | 1.000000 | 1.26527e-10 | 1.000000 |
| rad1                          | 1.17114e-10 | 1.000000 | 1.17114e-10 | 1.000000 |
| rad11                         | 7.92863e-11 | 1.000000 | 7.92863e-11 | 1.000000 |
| rad60syn                      | 2.39184e-11 | 1.000000 | 2.39184e-11 | 1.000000 |
| rad3                          | 1.69060e-11 | 1.000000 | 1.69060e-11 | 1.000000 |
| rad60anti                     | 1.17825e-11 | 1.000000 | 1.17825e-11 | 1.000000 |
| PAH10+CH3                     | 1.09684e-11 | 1.000000 | 1.09684e-11 | 1.000000 |
| PAH3+H                        | 1.07966e-11 | 1.000000 | 1.07966e-11 | 1.000000 |
| rad9                          | 1.06322e-11 | 1.000000 | 1.06322e-11 | 1.000000 |
| rad23                         | 1.05250e-11 | 1.000000 | 1.05250e-11 | 1.000000 |
| rad4                          | 8.58643e-12 | 1.000000 | 8.58643e-12 | 1.000000 |
| rad46                         | 7.56476e-12 | 1.000000 | 7.56476e-12 | 1.000000 |
| PhcycC3H3_A+H                 | 2.32110e-12 | 1.000000 | 2.32110e-12 | 1.000000 |
| rad59                         | 2.19690e-12 | 1.000000 | 2.19690e-12 | 1.000000 |
| rad13                         | 8.17880e-13 | 1.000000 | 8.17880e-13 | 1.000000 |
| rad43                         | 4.69155e-13 | 1.000000 | 4.69155e-13 | 1.000000 |
| rad45                         | 2.62499e-13 | 1.000000 | 2.62499e-13 | 1.000000 |
| rad54                         | 2.41089e-13 | 1.000000 | 2.41089e-13 | 1.000000 |

|                               |             |         |             |         |
|-------------------------------|-------------|---------|-------------|---------|
| rad62                         | 9.50938e-14 | 1.00000 | 9.50938e-14 | 1.00000 |
| Benzene+cycloprop-1-enylidene | 6.98038e-14 | 1.00000 | 6.98038e-14 | 1.00000 |
| rad50                         | 5.62361e-14 | 1.00000 | 5.62361e-14 | 1.00000 |
| rad36                         | 1.60844e-14 | 1.00000 | 1.60844e-14 | 1.00000 |
| rad22                         | 1.47188e-14 | 1.00000 | 1.47188e-14 | 1.00000 |
| Phenyl+cycC3H4                | 7.86468e-15 | 1.00000 | 0.00000     | 1.00000 |
| rad15                         | 6.45901e-15 | 1.00000 | 6.45901e-15 | 1.00000 |
| rad70                         | 4.80346e-15 | 1.00000 | 4.80346e-15 | 1.00000 |
| rad55                         | 1.90830e-15 | 1.00000 | 1.90830e-15 | 1.00000 |
| rad14                         | 1.45849e-15 | 1.00000 | 1.45849e-15 | 1.00000 |
| PAH1+H                        | 1.41684e-15 | 1.00000 | 1.41684e-15 | 1.00000 |
| rad33                         | 1.30732e-15 | 1.00000 | 1.30732e-15 | 1.00000 |
| rad27                         | 1.20889e-15 | 1.00000 | 1.20889e-15 | 1.00000 |
| rad25                         | 5.72705e-16 | 1.00000 | 5.72705e-16 | 1.00000 |
| rad52                         | 3.97923e-16 | 1.00000 | 3.97923e-16 | 1.00000 |
| PhcycC3H3_B+H                 | 3.56730e-16 | 1.00000 | 3.56730e-16 | 1.00000 |
| rad58                         | 2.01339e-16 | 1.00000 | 2.01339e-16 | 1.00000 |
| rad51                         | 1.12154e-16 | 1.00000 | 1.12154e-16 | 1.00000 |
| rad34                         | 6.29623e-17 | 1.00000 | 6.29623e-17 | 1.00000 |
| rad41                         | 1.67852e-17 | 1.00000 | 1.67852e-17 | 1.00000 |
| rad42                         | 1.27278e-17 | 1.00000 | 1.27278e-17 | 1.00000 |
| rad65                         | 2.39223e-18 | 1.00000 | 2.39223e-18 | 1.00000 |
| rad5                          | 3.20008e-19 | 1.00000 | 3.20008e-19 | 1.00000 |
| rad18                         | 6.45688e-20 | 1.00000 | 6.45688e-20 | 1.00000 |
| rad20                         | 5.31164e-20 | 1.00000 | 5.31164e-20 | 1.00000 |
| rad12                         | 5.22702e-20 | 1.00000 | 5.22702e-20 | 1.00000 |
| rad31                         | 4.00008e-20 | 1.00000 | 4.00008e-20 | 1.00000 |
| rad21                         | 3.49232e-20 | 1.00000 | 3.49232e-20 | 1.00000 |
| rad19anti                     | 6.85419e-21 | 1.00000 | 6.85419e-21 | 1.00000 |
| rad53                         | 3.12415e-21 | 1.00000 | 3.12415e-21 | 1.00000 |
| rad24                         | 2.14133e-21 | 1.00000 | 2.14133e-21 | 1.00000 |
| rad64                         | 2.13466e-22 | 1.00000 | 2.13466e-22 | 1.00000 |
| rad61                         | 9.73006e-25 | 1.00000 | 9.73006e-25 | 1.00000 |
| rad47                         | 8.86762e-26 | 1.00000 | 8.86762e-26 | 1.00000 |
| rad56                         | 1.02214e-26 | 1.00000 | 1.02214e-26 | 1.00000 |
| rad68syn                      | 5.34737e-28 | 1.00000 | 5.34737e-28 | 1.00000 |
| rad68anti                     | 4.32595e-28 | 1.00000 | 4.32595e-28 | 1.00000 |
| rad40syn                      | 1.63749e-32 | 1.00000 | 1.63749e-32 | 1.00000 |
| rad40anti                     | 1.28891e-32 | 1.00000 | 1.28891e-32 | 1.00000 |
| rad73                         | 1.80376e-33 | 1.00000 | 1.80376e-33 | 1.00000 |
| PAH8+H                        | 4.11518e-35 | 1.00000 | 4.11518e-35 | 1.00000 |
| rad19syn                      | 9.31470e-38 | 1.00000 | 9.31470e-38 | 1.00000 |
| rad71                         | 1.30988e-38 | 1.00000 | 1.30988e-38 | 1.00000 |
| rad8                          | 2.82482e-56 | 1.00000 | 2.82482e-56 | 1.00000 |

1.00000000 Pa, 130.000000 K

| Rate constant             | True (fraction)        | Effective (fraction)   |
|---------------------------|------------------------|------------------------|
| Total                     | 3.81236e-15 (1.00 )    | 3.81236e-15 (1.00 )    |
| Formation of rad19        | 3.81236e-15 (1.000 )   | 3.81236e-15 (1.000 )   |
| H-abstraction to cyc2enyl | 1.44825e-21 (3.80e-07) | 1.44825e-21 (3.80e-07) |
| H-abstraction to cyclenyl | 2.94348e-27 (7.72e-13) | 2.94348e-27 (7.72e-13) |

| species                       | PYtrue      | Cumul    | PYeffective | Cumul    |
|-------------------------------|-------------|----------|-------------|----------|
| Indene+H                      | 0.999714    | 0.999714 | 0.999714    | 0.999714 |
| PhCHCCH2+H                    | 0.000270977 | 0.999985 | 0.000270977 | 0.999985 |
| PhCCH+CH3                     | 4.58952e-06 | 0.999989 | 4.58952e-06 | 0.999989 |
| C2H2+PhCH2                    | 3.16267e-06 | 0.999992 | 3.16267e-06 | 0.999992 |
| PhCCCH3+H                     | 2.72518e-06 | 0.999995 | 2.72518e-06 | 0.999995 |
| Ph+MeAc                       | 2.11561e-06 | 0.999997 | 2.11561e-06 | 0.999997 |
| rad6                          | 1.40912e-06 | 0.999999 | 1.40912e-06 | 0.999999 |
| rad67                         | 6.41000e-07 | 0.999999 | 6.41000e-07 | 0.999999 |
| Benzene+cycloprop-2-enylidene | 3.79882e-07 | 1.000000 | 3.79882e-07 | 1.000000 |
| rad35                         | 2.80314e-07 | 1.000000 | 2.80314e-07 | 1.000000 |
| Ph+Allene                     | 1.55535e-07 | 1.00000  | 1.55535e-07 | 1.00000  |
| PhCH2CCH+H                    | 1.99040e-08 | 1.00000  | 1.99040e-08 | 1.00000  |
| PAH7+H                        | 1.93506e-08 | 1.00000  | 1.93506e-08 | 1.00000  |
| rad37                         | 6.79207e-09 | 1.00000  | 6.79207e-09 | 1.00000  |
| rad39                         | 5.44696e-09 | 1.00000  | 5.44696e-09 | 1.00000  |
| rad30                         | 5.20091e-09 | 1.00000  | 5.20091e-09 | 1.00000  |
| rad28                         | 1.69141e-09 | 1.00000  | 1.69141e-09 | 1.00000  |
| rad2                          | 1.53511e-09 | 1.00000  | 1.53511e-09 | 1.00000  |
| PAH9+H                        | 3.12855e-10 | 1.00000  | 3.12855e-10 | 1.00000  |
| rad7                          | 2.17244e-10 | 1.00000  | 2.17244e-10 | 1.00000  |
| rad26                         | 1.91405e-10 | 1.00000  | 1.91405e-10 | 1.00000  |
| rad38                         | 1.39735e-10 | 1.00000  | 1.39735e-10 | 1.00000  |
| rad10                         | 1.06827e-10 | 1.00000  | 1.06827e-10 | 1.00000  |
| rad1                          | 9.97232e-11 | 1.00000  | 9.97232e-11 | 1.00000  |

|                               |             |         |             |         |
|-------------------------------|-------------|---------|-------------|---------|
| rad11                         | 6.62781e-11 | 1.00000 | 6.62781e-11 | 1.00000 |
| rad60syn                      | 2.53104e-11 | 1.00000 | 2.53104e-11 | 1.00000 |
| rad3                          | 1.42273e-11 | 1.00000 | 1.42273e-11 | 1.00000 |
| rad60anti                     | 1.24861e-11 | 1.00000 | 1.24861e-11 | 1.00000 |
| PAH10+CH3                     | 1.22297e-11 | 1.00000 | 1.22297e-11 | 1.00000 |
| PAH3+H                        | 1.16587e-11 | 1.00000 | 1.16587e-11 | 1.00000 |
| rad46                         | 8.22611e-12 | 1.00000 | 8.22611e-12 | 1.00000 |
| rad23                         | 8.15681e-12 | 1.00000 | 8.15681e-12 | 1.00000 |
| rad4                          | 7.23373e-12 | 1.00000 | 7.23373e-12 | 1.00000 |
| rad9                          | 6.13674e-12 | 1.00000 | 6.13674e-12 | 1.00000 |
| PhcycC3H3_A+H                 | 2.91344e-12 | 1.00000 | 2.91344e-12 | 1.00000 |
| rad59                         | 2.36491e-12 | 1.00000 | 2.36491e-12 | 1.00000 |
| Benzene+cycloprop-1-enylidene | 7.72089e-13 | 1.00000 | 7.72089e-13 | 1.00000 |
| rad13                         | 6.89618e-13 | 1.00000 | 6.89618e-13 | 1.00000 |
| rad43                         | 5.16415e-13 | 1.00000 | 5.16415e-13 | 1.00000 |
| rad54                         | 2.82407e-13 | 1.00000 | 2.82407e-13 | 1.00000 |
| rad45                         | 2.00592e-13 | 1.00000 | 2.00592e-13 | 1.00000 |
| rad62                         | 1.05529e-13 | 1.00000 | 1.05529e-13 | 1.00000 |
| rad50                         | 6.31826e-14 | 1.00000 | 6.31826e-14 | 1.00000 |
| rad36                         | 1.22997e-14 | 1.00000 | 1.22997e-14 | 1.00000 |
| Phenyl+cycC3H4                | 1.18041e-14 | 1.00000 | 0.00000     | 1.00000 |
| rad22                         | 1.10491e-14 | 1.00000 | 1.10491e-14 | 1.00000 |
| rad70                         | 5.78193e-15 | 1.00000 | 5.78193e-15 | 1.00000 |
| rad15                         | 3.70120e-15 | 1.00000 | 3.70120e-15 | 1.00000 |
| rad55                         | 2.32709e-15 | 1.00000 | 2.32709e-15 | 1.00000 |
| PAH1+H                        | 1.76886e-15 | 1.00000 | 1.76886e-15 | 1.00000 |
| rad14                         | 1.22294e-15 | 1.00000 | 1.22294e-15 | 1.00000 |
| rad33                         | 1.11219e-15 | 1.00000 | 1.11219e-15 | 1.00000 |
| rad27                         | 1.01970e-15 | 1.00000 | 1.01970e-15 | 1.00000 |
| PhcycC3H3_B+H                 | 8.71223e-16 | 1.00000 | 8.71223e-16 | 1.00000 |
| rad25                         | 4.82166e-16 | 1.00000 | 4.82166e-16 | 1.00000 |
| rad52                         | 4.58076e-16 | 1.00000 | 4.58076e-16 | 1.00000 |
| rad58                         | 2.34997e-16 | 1.00000 | 2.34997e-16 | 1.00000 |
| rad51                         | 1.32940e-16 | 1.00000 | 1.32940e-16 | 1.00000 |
| rad34                         | 8.04551e-17 | 1.00000 | 8.04551e-17 | 1.00000 |
| rad41                         | 2.15610e-17 | 1.00000 | 2.15610e-17 | 1.00000 |
| rad42                         | 1.60451e-17 | 1.00000 | 1.60451e-17 | 1.00000 |
| rad65                         | 2.87434e-18 | 1.00000 | 2.87434e-18 | 1.00000 |
| rad5                          | 2.32664e-19 | 1.00000 | 2.32664e-19 | 1.00000 |
| rad18                         | 4.77078e-20 | 1.00000 | 4.77078e-20 | 1.00000 |
| rad20                         | 4.28894e-20 | 1.00000 | 4.28894e-20 | 1.00000 |
| rad31                         | 3.49156e-20 | 1.00000 | 3.49156e-20 | 1.00000 |
| rad12                         | 3.03879e-20 | 1.00000 | 3.03879e-20 | 1.00000 |
| rad21                         | 2.82753e-20 | 1.00000 | 2.82753e-20 | 1.00000 |
| rad53                         | 7.36536e-21 | 1.00000 | 7.36536e-21 | 1.00000 |
| rad19anti                     | 3.96495e-21 | 1.00000 | 3.96495e-21 | 1.00000 |
| rad24                         | 1.65055e-21 | 1.00000 | 1.65055e-21 | 1.00000 |
| rad64                         | 6.43564e-22 | 1.00000 | 6.43564e-22 | 1.00000 |
| rad61                         | 6.08906e-24 | 1.00000 | 6.08906e-24 | 1.00000 |
| rad47                         | 8.62798e-26 | 1.00000 | 8.62798e-26 | 1.00000 |
| rad56                         | 8.62282e-26 | 1.00000 | 8.62282e-26 | 1.00000 |
| rad68syn                      | 5.35505e-27 | 1.00000 | 5.35505e-27 | 1.00000 |
| rad68anti                     | 4.30865e-27 | 1.00000 | 4.30865e-27 | 1.00000 |
| rad40syn                      | 4.39968e-31 | 1.00000 | 4.39968e-31 | 1.00000 |
| rad40anti                     | 3.46946e-31 | 1.00000 | 3.46946e-31 | 1.00000 |
| rad73                         | 3.69119e-32 | 1.00000 | 3.69119e-32 | 1.00000 |
| PAH8+H                        | 2.23139e-33 | 1.00000 | 2.23139e-33 | 1.00000 |
| rad71                         | 1.08344e-36 | 1.00000 | 1.08344e-36 | 1.00000 |
| rad19syn                      | 2.10398e-37 | 1.00000 | 2.10398e-37 | 1.00000 |
| rad8                          | 3.50772e-56 | 1.00000 | 3.50772e-56 | 1.00000 |

1.00000000 Pa, 140.000000 K

=====

| Rate constant             | True (fraction)        | Effective (fraction)   |
|---------------------------|------------------------|------------------------|
| Total                     | 4.99515e-15 (1.00 )    | 4.99515e-15 (1.00 )    |
| Formation of rad19        | 4.99514e-15 (1.000 )   | 4.99514e-15 (1.000 )   |
| H-abstraction to cyc2enyl | 5.62488e-21 (1.13e-06) | 5.62488e-21 (1.13e-06) |
| H-abstraction to cyc1enyl | 3.00047e-26 (6.01e-12) | 3.00047e-26 (6.01e-12) |

| species                       | PYtrue      | Cumul    | PYeffective | Cumul    |
|-------------------------------|-------------|----------|-------------|----------|
| Indene+H                      | 0.999704    | 0.999704 | 0.999704    | 0.999704 |
| PhCHCCH2+H                    | 0.000279131 | 0.999983 | 0.000279131 | 0.999983 |
| PhCCH+CH3                     | 4.76069e-06 | 0.999988 | 4.76069e-06 | 0.999988 |
| C2H2+PhCH2                    | 3.33605e-06 | 0.999991 | 3.33605e-06 | 0.999991 |
| PhCCCH3+H                     | 2.82643e-06 | 0.999994 | 2.82643e-06 | 0.999994 |
| Ph+MeAc                       | 2.21281e-06 | 0.999996 | 2.21281e-06 | 0.999996 |
| rad6                          | 1.19461e-06 | 0.999997 | 1.19461e-06 | 0.999997 |
| Benzene+cycloprop-2-enylidene | 1.12607e-06 | 0.999998 | 1.12607e-06 | 0.999998 |

|                               |             |          |             |          |
|-------------------------------|-------------|----------|-------------|----------|
| rad67                         | 6.67776e-07 | 0.999999 | 6.67776e-07 | 0.999999 |
| rad35                         | 2.91532e-07 | 0.999999 | 2.91532e-07 | 0.999999 |
| Ph+Allene                     | 1.70065e-07 | 1.000000 | 1.70065e-07 | 1.000000 |
| PhCH2CCH+H                    | 2.19940e-08 | 1.000000 | 2.19940e-08 | 1.000000 |
| PAH7+H                        | 2.10242e-08 | 1.000000 | 2.10242e-08 | 1.000000 |
| rad37                         | 7.16991e-09 | 1.000000 | 7.16991e-09 | 1.000000 |
| rad39                         | 5.92007e-09 | 1.000000 | 5.92007e-09 | 1.000000 |
| rad30                         | 5.42422e-09 | 1.000000 | 5.42422e-09 | 1.000000 |
| rad28                         | 1.42549e-09 | 1.000000 | 1.42549e-09 | 1.000000 |
| rad2                          | 1.29988e-09 | 1.000000 | 1.29988e-09 | 1.000000 |
| PAH9+H                        | 3.36295e-10 | 1.000000 | 3.36295e-10 | 1.000000 |
| rad7                          | 1.82288e-10 | 1.000000 | 1.82288e-10 | 1.000000 |
| rad26                         | 1.62780e-10 | 1.000000 | 1.62780e-10 | 1.000000 |
| rad38                         | 1.50752e-10 | 1.000000 | 1.50752e-10 | 1.000000 |
| rad10                         | 9.01118e-11 | 1.000000 | 9.01118e-11 | 1.000000 |
| rad1                          | 8.48311e-11 | 1.000000 | 8.48311e-11 | 1.000000 |
| rad11                         | 5.54197e-11 | 1.000000 | 5.54197e-11 | 1.000000 |
| rad60syn                      | 2.68488e-11 | 1.000000 | 2.68488e-11 | 1.000000 |
| PAH10+CH3                     | 1.37064e-11 | 1.000000 | 1.37064e-11 | 1.000000 |
| rad60anti                     | 1.32651e-11 | 1.000000 | 1.32651e-11 | 1.000000 |
| PAH3+H                        | 1.26360e-11 | 1.000000 | 1.26360e-11 | 1.000000 |
| rad3                          | 1.19669e-11 | 1.000000 | 1.19669e-11 | 1.000000 |
| rad46                         | 8.94902e-12 | 1.000000 | 8.94902e-12 | 1.000000 |
| rad23                         | 6.36037e-12 | 1.000000 | 6.36037e-12 | 1.000000 |
| rad4                          | 6.09166e-12 | 1.000000 | 6.09166e-12 | 1.000000 |
| Benzene+cycloprop-1-enylidene | 6.00677e-12 | 1.000000 | 6.00677e-12 | 1.000000 |
| rad9                          | 3.74674e-12 | 1.000000 | 3.74674e-12 | 1.000000 |
| PhcycC3H3_A+H                 | 3.68443e-12 | 1.000000 | 3.68443e-12 | 1.000000 |
| rad59                         | 2.55459e-12 | 1.000000 | 2.55459e-12 | 1.000000 |
| rad13                         | 5.81388e-13 | 1.000000 | 5.81388e-13 | 1.000000 |
| rad43                         | 5.70842e-13 | 1.000000 | 5.70842e-13 | 1.000000 |
| rad54                         | 3.30918e-13 | 1.000000 | 3.30918e-13 | 1.000000 |
| rad45                         | 1.54454e-13 | 1.000000 | 1.54454e-13 | 1.000000 |
| rad62                         | 1.17566e-13 | 1.000000 | 1.17566e-13 | 1.000000 |
| rad50                         | 7.11623e-14 | 1.000000 | 7.11623e-14 | 1.000000 |
| Phenyl+cycC3H4                | 1.75978e-14 | 1.000000 | 0.000000    | 1.000000 |
| rad36                         | 9.47952e-15 | 1.000000 | 9.47952e-15 | 1.000000 |
| rad22                         | 8.37338e-15 | 1.000000 | 8.37338e-15 | 1.000000 |
| rad70                         | 6.98427e-15 | 1.000000 | 6.98427e-15 | 1.000000 |
| rad55                         | 2.84326e-15 | 1.000000 | 2.84326e-15 | 1.000000 |
| rad15                         | 2.24506e-15 | 1.000000 | 2.24506e-15 | 1.000000 |
| PAH1+H                        | 2.22435e-15 | 1.000000 | 2.22435e-15 | 1.000000 |
| PhcycC3H3_B+H                 | 1.95169e-15 | 1.000000 | 1.95169e-15 | 1.000000 |
| rad14                         | 1.02555e-15 | 1.000000 | 1.02555e-15 | 1.000000 |
| rad33                         | 9.45450e-16 | 1.000000 | 9.45450e-16 | 1.000000 |
| rad27                         | 8.59773e-16 | 1.000000 | 8.59773e-16 | 1.000000 |
| rad52                         | 5.29478e-16 | 1.000000 | 5.29478e-16 | 1.000000 |
| rad25                         | 4.06003e-16 | 1.000000 | 4.06003e-16 | 1.000000 |
| rad58                         | 2.76529e-16 | 1.000000 | 2.76529e-16 | 1.000000 |
| rad51                         | 1.58532e-16 | 1.000000 | 1.58532e-16 | 1.000000 |
| rad34                         | 1.03395e-16 | 1.000000 | 1.03395e-16 | 1.000000 |
| rad41                         | 2.79085e-17 | 1.000000 | 2.79085e-17 | 1.000000 |
| rad42                         | 2.03748e-17 | 1.000000 | 2.03748e-17 | 1.000000 |
| rad65                         | 3.47698e-18 | 1.000000 | 3.47698e-18 | 1.000000 |
| rad5                          | 1.71305e-19 | 1.000000 | 1.71305e-19 | 1.000000 |
| rad18                         | 3.58500e-20 | 1.000000 | 3.58500e-20 | 1.000000 |
| rad20                         | 3.50380e-20 | 1.000000 | 3.50380e-20 | 1.000000 |
| rad31                         | 3.05248e-20 | 1.000000 | 3.05248e-20 | 1.000000 |
| rad21                         | 2.31617e-20 | 1.000000 | 2.31617e-20 | 1.000000 |
| rad12                         | 1.86956e-20 | 1.000000 | 1.86956e-20 | 1.000000 |
| rad53                         | 1.61823e-20 | 1.000000 | 1.61823e-20 | 1.000000 |
| rad19anti                     | 2.42971e-21 | 1.000000 | 2.42971e-21 | 1.000000 |
| rad64                         | 1.74496e-21 | 1.000000 | 1.74496e-21 | 1.000000 |
| rad24                         | 1.28217e-21 | 1.000000 | 1.28217e-21 | 1.000000 |
| rad61                         | 3.01132e-23 | 1.000000 | 3.01132e-23 | 1.000000 |
| rad56                         | 5.53952e-25 | 1.000000 | 5.53952e-25 | 1.000000 |
| rad47                         | 8.45792e-26 | 1.000000 | 8.45792e-26 | 1.000000 |
| rad68syn                      | 3.95271e-26 | 1.000000 | 3.95271e-26 | 1.000000 |
| rad68anti                     | 3.16413e-26 | 1.000000 | 3.16413e-26 | 1.000000 |
| rad40syn                      | 7.46307e-30 | 1.000000 | 7.46307e-30 | 1.000000 |
| rad40anti                     | 5.90643e-30 | 1.000000 | 5.90643e-30 | 1.000000 |
| rad73                         | 5.08162e-31 | 1.000000 | 5.08162e-31 | 1.000000 |
| PAH8+H                        | 6.58540e-32 | 1.000000 | 6.58540e-32 | 1.000000 |
| rad71                         | 4.00799e-35 | 1.000000 | 4.00799e-35 | 1.000000 |
| rad19syn                      | 4.98182e-37 | 1.000000 | 4.98182e-37 | 1.000000 |
| rad8                          | 4.42601e-56 | 1.000000 | 4.42601e-56 | 1.000000 |

1.00000000 Pa, 150.000000 K

=====  
Rate constant | True (fraction)                      Effective (fraction)

|                           |                        |                        |
|---------------------------|------------------------|------------------------|
| Total                     | 6.34137e-15 (1.00 )    | 6.34137e-15 (1.00 )    |
| Formation of rad19        | 6.34135e-15 (1.000 )   | 6.34135e-15 (1.000 )   |
| H-abstraction to cyc2enyl | 1.81685e-20 (2.87e-06) | 1.81685e-20 (2.87e-06) |
| H-abstraction to cyclenyl | 2.23765e-25 (3.53e-11) | 2.23765e-25 (3.53e-11) |

| species                       | PYtrue      | Cumul    | PYeffective | Cumul    |
|-------------------------------|-------------|----------|-------------|----------|
| Indene+H                      | 0.999693    | 0.999693 | 0.999693    | 0.999693 |
| PhCHCCH2+H                    | 0.000287908 | 0.999981 | 0.000287908 | 0.999981 |
| PhCCH+CH3                     | 4.94145e-06 | 0.999986 | 4.94145e-06 | 0.999986 |
| C2H2+PhCH2                    | 3.51802e-06 | 0.999990 | 3.51802e-06 | 0.999990 |
| PhCCCH3+H                     | 2.93527e-06 | 0.999992 | 2.93527e-06 | 0.999992 |
| Benzene+cycloprop-2-enylidene | 2.86508e-06 | 0.999995 | 2.86508e-06 | 0.999995 |
| Ph+MeAc                       | 2.31837e-06 | 0.999998 | 2.31837e-06 | 0.999998 |
| rad6                          | 1.01125e-06 | 0.999999 | 1.01125e-06 | 0.999999 |
| rad67                         | 6.96968e-07 | 0.999999 | 6.96968e-07 | 0.999999 |
| rad35                         | 3.03739e-07 | 1.000000 | 3.03739e-07 | 1.000000 |
| Ph+Allene                     | 1.85845e-07 | 1.000000 | 1.85845e-07 | 1.000000 |
| PhCH2CCH+H                    | 2.43085e-08 | 1.000000 | 2.43085e-08 | 1.000000 |
| PAH7+H                        | 2.28012e-08 | 1.000000 | 2.28012e-08 | 1.000000 |
| rad37                         | 7.58686e-09 | 1.000000 | 7.58686e-09 | 1.000000 |
| rad39                         | 6.42228e-09 | 1.000000 | 6.42228e-09 | 1.000000 |
| rad30                         | 5.66691e-09 | 1.000000 | 5.66691e-09 | 1.000000 |
| rad28                         | 1.20019e-09 | 1.000000 | 1.20019e-09 | 1.000000 |
| rad2                          | 1.09893e-09 | 1.000000 | 1.09893e-09 | 1.000000 |
| PAH9+H                        | 3.61666e-10 | 1.000000 | 3.61666e-10 | 1.000000 |
| rad38                         | 1.62827e-10 | 1.000000 | 1.62827e-10 | 1.000000 |
| rad7                          | 1.52870e-10 | 1.000000 | 1.52870e-10 | 1.000000 |
| rad26                         | 1.38183e-10 | 1.000000 | 1.38183e-10 | 1.000000 |
| rad10                         | 7.59192e-11 | 1.000000 | 7.59192e-11 | 1.000000 |
| rad1                          | 7.20770e-11 | 1.000000 | 7.20770e-11 | 1.000000 |
| rad11                         | 4.63296e-11 | 1.000000 | 4.63296e-11 | 1.000000 |
| Benzene+cycloprop-1-enylidene | 3.52865e-11 | 1.000000 | 3.52865e-11 | 1.000000 |
| rad60syn                      | 2.85580e-11 | 1.000000 | 2.85580e-11 | 1.000000 |
| PAH10+CH3                     | 1.54491e-11 | 1.000000 | 1.54491e-11 | 1.000000 |
| rad60anti                     | 1.41323e-11 | 1.000000 | 1.41323e-11 | 1.000000 |
| PAH3+H                        | 1.37510e-11 | 1.000000 | 1.37510e-11 | 1.000000 |
| rad3                          | 1.00568e-11 | 1.000000 | 1.00568e-11 | 1.000000 |
| rad46                         | 9.74621e-12 | 1.000000 | 9.74621e-12 | 1.000000 |
| rad4                          | 5.12601e-12 | 1.000000 | 5.12601e-12 | 1.000000 |
| rad23                         | 4.98355e-12 | 1.000000 | 4.98355e-12 | 1.000000 |
| PhcycC3H3_A+H                 | 4.69497e-12 | 1.000000 | 4.69497e-12 | 1.000000 |
| rad59                         | 2.77003e-12 | 1.000000 | 2.77003e-12 | 1.000000 |
| rad9                          | 2.40131e-12 | 1.000000 | 2.40131e-12 | 1.000000 |
| rad43                         | 6.33941e-13 | 1.000000 | 6.33941e-13 | 1.000000 |
| rad13                         | 4.89860e-13 | 1.000000 | 4.89860e-13 | 1.000000 |
| rad54                         | 3.88383e-13 | 1.000000 | 3.88383e-13 | 1.000000 |
| rad62                         | 1.31542e-13 | 1.000000 | 1.31542e-13 | 1.000000 |
| rad45                         | 1.19653e-13 | 1.000000 | 1.19653e-13 | 1.000000 |
| rad50                         | 8.04121e-14 | 1.000000 | 8.04121e-14 | 1.000000 |
| Phenyl+cycC3H4                | 2.61242e-14 | 1.000000 | 0.000000    | 1.000000 |
| rad70                         | 8.47493e-15 | 1.000000 | 8.47493e-15 | 1.000000 |
| rad36                         | 7.35232e-15 | 1.000000 | 7.35232e-15 | 1.000000 |
| rad22                         | 6.39435e-15 | 1.000000 | 6.39435e-15 | 1.000000 |
| PhcycC3H3_B+H                 | 4.08899e-15 | 1.000000 | 4.08899e-15 | 1.000000 |
| rad55                         | 3.48505e-15 | 1.000000 | 3.48505e-15 | 1.000000 |
| PAH1+H                        | 2.81924e-15 | 1.000000 | 2.81924e-15 | 1.000000 |
| rad15                         | 1.43040e-15 | 1.000000 | 1.43040e-15 | 1.000000 |
| rad14                         | 8.59705e-16 | 1.000000 | 8.59705e-16 | 1.000000 |
| rad33                         | 8.02831e-16 | 1.000000 | 8.02831e-16 | 1.000000 |
| rad27                         | 7.24367e-16 | 1.000000 | 7.24367e-16 | 1.000000 |
| rad52                         | 6.15050e-16 | 1.000000 | 6.15050e-16 | 1.000000 |
| rad25                         | 3.41754e-16 | 1.000000 | 3.41754e-16 | 1.000000 |
| rad58                         | 3.28257e-16 | 1.000000 | 3.28257e-16 | 1.000000 |
| rad51                         | 1.90369e-16 | 1.000000 | 1.90369e-16 | 1.000000 |
| rad34                         | 1.33743e-16 | 1.000000 | 1.33743e-16 | 1.000000 |
| rad41                         | 3.64131e-17 | 1.000000 | 3.64131e-17 | 1.000000 |
| rad42                         | 2.60667e-17 | 1.000000 | 2.60667e-17 | 1.000000 |
| rad65                         | 4.23819e-18 | 1.000000 | 4.23819e-18 | 1.000000 |
| rad5                          | 1.27448e-19 | 1.000000 | 1.27448e-19 | 1.000000 |
| rad53                         | 3.36490e-20 | 1.000000 | 3.36490e-20 | 1.000000 |
| rad20                         | 2.88997e-20 | 1.000000 | 2.88997e-20 | 1.000000 |
| rad18                         | 2.73175e-20 | 1.000000 | 2.73175e-20 | 1.000000 |
| rad31                         | 2.67277e-20 | 1.000000 | 2.67277e-20 | 1.000000 |
| rad21                         | 1.91560e-20 | 1.000000 | 1.91560e-20 | 1.000000 |
| rad12                         | 1.20799e-20 | 1.000000 | 1.20799e-20 | 1.000000 |
| rad64                         | 4.34404e-21 | 1.000000 | 4.34404e-21 | 1.000000 |
| rad19anti                     | 1.56519e-21 | 1.000000 | 1.56519e-21 | 1.000000 |
| rad24                         | 1.00227e-21 | 1.000000 | 1.00227e-21 | 1.000000 |

|           |             |          |             |          |
|-----------|-------------|----------|-------------|----------|
| rad61     | 1.23785e-22 | 1.000000 | 1.23785e-22 | 1.000000 |
| rad56     | 2.86002e-24 | 1.000000 | 2.86002e-24 | 1.000000 |
| rad68syn  | 2.28653e-25 | 1.000000 | 2.28653e-25 | 1.000000 |
| rad68anti | 1.82096e-25 | 1.000000 | 1.82096e-25 | 1.000000 |
| rad47     | 8.35632e-26 | 1.000000 | 8.35632e-26 | 1.000000 |
| rad40syn  | 8.78722e-29 | 1.000000 | 8.78722e-29 | 1.000000 |
| rad40anti | 6.98446e-29 | 1.000000 | 6.98446e-29 | 1.000000 |
| rad73     | 5.09516e-30 | 1.000000 | 5.09516e-30 | 1.000000 |
| PAH8+H    | 1.24451e-30 | 1.000000 | 1.24451e-30 | 1.000000 |
| rad71     | 9.05729e-34 | 1.000000 | 9.05729e-34 | 1.000000 |
| rad19syn  | 1.23836e-36 | 1.000000 | 1.23836e-36 | 1.000000 |
| rad8      | 5.66877e-56 | 1.000000 | 5.66877e-56 | 1.000000 |

1.00000000 Pa, 160.000000 K

| Rate constant             | True (fraction)        | Effective (fraction)   |
|---------------------------|------------------------|------------------------|
| Total                     | 7.84423e-15 (1.00 )    | 7.84423e-15 (1.00 )    |
| Formation of rad19        | 7.84418e-15 (1.000 )   | 7.84418e-15 (1.000 )   |
| H-abstraction to cyc2enyl | 5.05321e-20 (6.44e-06) | 5.05321e-20 (6.44e-06) |
| H-abstraction to cyclenyl | 1.29479e-24 (1.65e-10) | 1.29479e-24 (1.65e-10) |

| species                       | PYtrue      | Cumul    | PYeffective | Cumul    |
|-------------------------------|-------------|----------|-------------|----------|
| Indene+H                      | 0.999680    | 0.999680 | 0.999680    | 0.999680 |
| PhCHCCH2+H                    | 0.000297386 | 0.999977 | 0.000297386 | 0.999977 |
| Benzene+cycloprop-2-enylidene | 6.44194e-06 | 0.999983 | 6.44194e-06 | 0.999983 |
| PhCCH+CH3                     | 5.13343e-06 | 0.999989 | 5.13343e-06 | 0.999989 |
| C2H2+PhCH2                    | 3.71070e-06 | 0.999992 | 3.71070e-06 | 0.999992 |
| PhCCCH3+H                     | 3.05280e-06 | 0.999995 | 3.05280e-06 | 0.999995 |
| Ph+MeAc                       | 2.43352e-06 | 0.999998 | 2.43352e-06 | 0.999998 |
| rad6                          | 8.54556e-07 | 0.999999 | 8.54556e-07 | 0.999999 |
| rad67                         | 7.28908e-07 | 0.999999 | 7.28908e-07 | 0.999999 |
| rad35                         | 3.17070e-07 | 1.000000 | 3.17070e-07 | 1.000000 |
| Ph+Allene                     | 2.03132e-07 | 1.000000 | 2.03132e-07 | 1.000000 |
| PhCH2CCH+H                    | 2.68927e-08 | 1.000000 | 2.68927e-08 | 1.000000 |
| PAH7+H                        | 2.47058e-08 | 1.000000 | 2.47058e-08 | 1.000000 |
| rad37                         | 8.04917e-09 | 1.000000 | 8.04917e-09 | 1.000000 |
| rad39                         | 6.96036e-09 | 1.000000 | 6.96036e-09 | 1.000000 |
| rad30                         | 5.93183e-09 | 1.000000 | 5.93183e-09 | 1.000000 |
| rad28                         | 1.00918e-09 | 1.000000 | 1.00918e-09 | 1.000000 |
| rad2                          | 9.27350e-10 | 1.000000 | 9.27350e-10 | 1.000000 |
| PAH9+H                        | 3.89355e-10 | 1.000000 | 3.89355e-10 | 1.000000 |
| rad38                         | 1.76171e-10 | 1.000000 | 1.76171e-10 | 1.000000 |
| Benzene+cycloprop-1-enylidene | 1.65062e-10 | 1.000000 | 1.65062e-10 | 1.000000 |
| rad7                          | 1.28078e-10 | 1.000000 | 1.28078e-10 | 1.000000 |
| rad26                         | 1.17064e-10 | 1.000000 | 1.17064e-10 | 1.000000 |
| rad10                         | 6.38671e-11 | 1.000000 | 6.38671e-11 | 1.000000 |
| rad1                          | 6.11567e-11 | 1.000000 | 6.11567e-11 | 1.000000 |
| rad11                         | 3.87049e-11 | 1.000000 | 3.87049e-11 | 1.000000 |
| rad60syn                      | 3.04667e-11 | 1.000000 | 3.04667e-11 | 1.000000 |
| PAH10+CH3                     | 1.75207e-11 | 1.000000 | 1.75207e-11 | 1.000000 |
| rad60anti                     | 1.51025e-11 | 1.000000 | 1.51025e-11 | 1.000000 |
| PAH3+H                        | 1.50306e-11 | 1.000000 | 1.50306e-11 | 1.000000 |
| rad46                         | 1.06324e-11 | 1.000000 | 1.06324e-11 | 1.000000 |
| rad3                          | 8.44138e-12 | 1.000000 | 8.44138e-12 | 1.000000 |
| PhcycC3H3_A+H                 | 6.02785e-12 | 1.000000 | 6.02785e-12 | 1.000000 |
| rad4                          | 4.30883e-12 | 1.000000 | 4.30883e-12 | 1.000000 |
| rad23                         | 3.91949e-12 | 1.000000 | 3.91949e-12 | 1.000000 |
| rad59                         | 3.01619e-12 | 1.000000 | 3.01619e-12 | 1.000000 |
| rad9                          | 1.60585e-12 | 1.000000 | 1.60585e-12 | 1.000000 |
| rad43                         | 7.07554e-13 | 1.000000 | 7.07554e-13 | 1.000000 |
| rad54                         | 4.57025e-13 | 1.000000 | 4.57025e-13 | 1.000000 |
| rad13                         | 4.12349e-13 | 1.000000 | 4.12349e-13 | 1.000000 |
| rad62                         | 1.47869e-13 | 1.000000 | 1.47869e-13 | 1.000000 |
| rad45                         | 9.31451e-14 | 1.000000 | 9.31451e-14 | 1.000000 |
| rad50                         | 9.12250e-14 | 1.000000 | 9.12250e-14 | 1.000000 |
| Phenyl+cycC3H4                | 3.86829e-14 | 1.000000 | 0.000000    | 1.000000 |
| rad70                         | 1.03384e-14 | 1.000000 | 1.03384e-14 | 1.000000 |
| PhcycC3H3_B+H                 | 8.12592e-15 | 1.000000 | 8.12592e-15 | 1.000000 |
| rad36                         | 5.73180e-15 | 1.000000 | 5.73180e-15 | 1.000000 |
| rad22                         | 4.91330e-15 | 1.000000 | 4.91330e-15 | 1.000000 |
| rad55                         | 4.28950e-15 | 1.000000 | 4.28950e-15 | 1.000000 |
| PAH1+H                        | 3.60282e-15 | 1.000000 | 3.60282e-15 | 1.000000 |
| rad15                         | 9.51421e-16 | 1.000000 | 9.51421e-16 | 1.000000 |
| rad14                         | 7.20140e-16 | 1.000000 | 7.20140e-16 | 1.000000 |
| rad52                         | 7.18543e-16 | 1.000000 | 7.18543e-16 | 1.000000 |
| rad33                         | 6.80794e-16 | 1.000000 | 6.80794e-16 | 1.000000 |
| rad27                         | 6.09617e-16 | 1.000000 | 6.09617e-16 | 1.000000 |
| rad58                         | 3.93269e-16 | 1.000000 | 3.93269e-16 | 1.000000 |

|           |             |          |             |          |
|-----------|-------------|----------|-------------|----------|
| rad25     | 2.87458e-16 | 1.000000 | 2.87458e-16 | 1.000000 |
| rad51     | 2.30374e-16 | 1.000000 | 2.30374e-16 | 1.000000 |
| rad34     | 1.74208e-16 | 1.000000 | 1.74208e-16 | 1.000000 |
| rad41     | 4.78892e-17 | 1.000000 | 4.78892e-17 | 1.000000 |
| rad42     | 3.35977e-17 | 1.000000 | 3.35977e-17 | 1.000000 |
| rad65     | 5.20932e-18 | 1.000000 | 5.20932e-18 | 1.000000 |
| rad5      | 9.56416e-20 | 1.000000 | 9.56416e-20 | 1.000000 |
| rad53     | 6.69862e-20 | 1.000000 | 6.69862e-20 | 1.000000 |
| rad20     | 2.40274e-20 | 1.000000 | 2.40274e-20 | 1.000000 |
| rad31     | 2.34406e-20 | 1.000000 | 2.34406e-20 | 1.000000 |
| rad18     | 2.10592e-20 | 1.000000 | 2.10592e-20 | 1.000000 |
| rad21     | 1.59705e-20 | 1.000000 | 1.59705e-20 | 1.000000 |
| rad64     | 1.00923e-20 | 1.000000 | 1.00923e-20 | 1.000000 |
| rad12     | 8.14805e-21 | 1.000000 | 8.14805e-21 | 1.000000 |
| rad19anti | 1.05353e-21 | 1.000000 | 1.05353e-21 | 1.000000 |
| rad24     | 7.87446e-22 | 1.000000 | 7.87446e-22 | 1.000000 |
| rad61     | 4.39157e-22 | 1.000000 | 4.39157e-22 | 1.000000 |
| rad56     | 1.23785e-23 | 1.000000 | 1.23785e-23 | 1.000000 |
| rad68syn  | 1.08697e-24 | 1.000000 | 1.08697e-24 | 1.000000 |
| rad68anti | 8.60972e-25 | 1.000000 | 8.60972e-25 | 1.000000 |
| rad47     | 8.32493e-26 | 1.000000 | 8.32493e-26 | 1.000000 |
| rad40syn  | 7.71470e-28 | 1.000000 | 7.71470e-28 | 1.000000 |
| rad40anti | 6.15813e-28 | 1.000000 | 6.15813e-28 | 1.000000 |
| rad73     | 3.95394e-29 | 1.000000 | 3.95394e-29 | 1.000000 |
| PAH8+H    | 1.65547e-29 | 1.000000 | 1.65547e-29 | 1.000000 |
| rad71     | 1.40808e-32 | 1.000000 | 1.40808e-32 | 1.000000 |
| rad19syn  | 3.23539e-36 | 1.000000 | 3.23539e-36 | 1.000000 |
| rad8      | 7.36445e-56 | 1.000000 | 7.36445e-56 | 1.000000 |

1.00000000 Pa, 170.000000 K

| Rate constant             | True (fraction)        | Effective (fraction)   |
|---------------------------|------------------------|------------------------|
| Total                     | 9.49598e-15 (1.00 )    | 9.49598e-15 (1.00 )    |
| Formation of rad19        | 9.49586e-15 (1.000 )   | 9.49586e-15 (1.000 )   |
| H-abstraction to cyc2enyl | 1.24279e-19 (1.31e-05) | 1.24279e-19 (1.31e-05) |
| H-abstraction to cyclenyl | 6.08025e-24 (6.40e-10) | 6.08025e-24 (6.40e-10) |

| species                       | PYtrue      | Cumul    | PYeffective | Cumul    |
|-------------------------------|-------------|----------|-------------|----------|
| Indene+H                      | 0.999662    | 0.999662 | 0.999662    | 0.999662 |
| PhCHCCH2+H                    | 0.000307650 | 0.999970 | 0.000307650 | 0.999970 |
| Benzene+cycloprop-2-enylidene | 1.30875e-05 | 0.999983 | 1.30875e-05 | 0.999983 |
| PhCCH+CH3                     | 5.33837e-06 | 0.999988 | 5.33837e-06 | 0.999988 |
| C2H2+PhCH2                    | 3.91629e-06 | 0.999992 | 3.91629e-06 | 0.999992 |
| PhCCCH3+H                     | 3.18021e-06 | 0.999995 | 3.18021e-06 | 0.999995 |
| Ph+MeAc                       | 2.55965e-06 | 0.999998 | 2.55965e-06 | 0.999998 |
| rad67                         | 7.63969e-07 | 0.999998 | 7.63969e-07 | 0.999998 |
| rad6                          | 7.20746e-07 | 0.999999 | 7.20746e-07 | 0.999999 |
| rad35                         | 3.31675e-07 | 0.999999 | 3.31675e-07 | 0.999999 |
| Ph+Allene                     | 2.22215e-07 | 1.000000 | 2.22215e-07 | 1.000000 |
| PhCH2CCH+H                    | 2.97994e-08 | 1.000000 | 2.97994e-08 | 1.000000 |
| PAH7+H                        | 2.67648e-08 | 1.000000 | 2.67648e-08 | 1.000000 |
| rad37                         | 8.56397e-09 | 1.000000 | 8.56397e-09 | 1.000000 |
| rad39                         | 7.54169e-09 | 1.000000 | 7.54169e-09 | 1.000000 |
| rad30                         | 6.22217e-09 | 1.000000 | 6.22217e-09 | 1.000000 |
| rad28                         | 8.47248e-10 | 1.000000 | 8.47248e-10 | 1.000000 |
| rad2                          | 7.80999e-10 | 1.000000 | 7.80999e-10 | 1.000000 |
| Benzene+cycloprop-1-enylidene | 6.40297e-10 | 1.000000 | 6.40297e-10 | 1.000000 |
| PAH9+H                        | 4.19805e-10 | 1.000000 | 4.19805e-10 | 1.000000 |
| rad38                         | 1.91027e-10 | 1.000000 | 1.91027e-10 | 1.000000 |
| rad7                          | 1.07174e-10 | 1.000000 | 1.07174e-10 | 1.000000 |
| rad26                         | 9.89556e-11 | 1.000000 | 9.89556e-11 | 1.000000 |
| rad10                         | 5.36365e-11 | 1.000000 | 5.36365e-11 | 1.000000 |
| rad1                          | 5.18121e-11 | 1.000000 | 5.18121e-11 | 1.000000 |
| rad60syn                      | 3.26080e-11 | 1.000000 | 3.26080e-11 | 1.000000 |
| rad11                         | 3.23024e-11 | 1.000000 | 3.23024e-11 | 1.000000 |
| PAH10+CH3                     | 2.00006e-11 | 1.000000 | 2.00006e-11 | 1.000000 |
| PAH3+H                        | 1.65076e-11 | 1.000000 | 1.65076e-11 | 1.000000 |
| rad60anti                     | 1.61932e-11 | 1.000000 | 1.61932e-11 | 1.000000 |
| rad46                         | 1.16249e-11 | 1.000000 | 1.16249e-11 | 1.000000 |
| PhcycC3H3_A+H                 | 7.79535e-12 | 1.000000 | 7.79535e-12 | 1.000000 |
| rad3                          | 7.07517e-12 | 1.000000 | 7.07517e-12 | 1.000000 |
| rad4                          | 3.61717e-12 | 1.000000 | 3.61717e-12 | 1.000000 |
| rad59                         | 3.29895e-12 | 1.000000 | 3.29895e-12 | 1.000000 |
| rad23                         | 3.09160e-12 | 1.000000 | 3.09160e-12 | 1.000000 |
| rad9                          | 1.11516e-12 | 1.000000 | 1.11516e-12 | 1.000000 |
| rad43                         | 7.93934e-13 | 1.000000 | 7.93934e-13 | 1.000000 |
| rad54                         | 5.39635e-13 | 1.000000 | 5.39635e-13 | 1.000000 |
| rad13                         | 3.46670e-13 | 1.000000 | 3.46670e-13 | 1.000000 |

|                |             |          |             |          |
|----------------|-------------|----------|-------------|----------|
| rad62          | 1.67053e-13 | 1.000000 | 1.67053e-13 | 1.000000 |
| rad50          | 1.03966e-13 | 1.000000 | 1.03966e-13 | 1.000000 |
| rad45          | 7.27911e-14 | 1.000000 | 7.27911e-14 | 1.000000 |
| Phenyl+cycC3H4 | 5.71891e-14 | 1.000000 | 0.00000     | 1.000000 |
| PhcycC3H3_B+H  | 1.54772e-14 | 1.000000 | 1.54772e-14 | 1.000000 |
| rad70          | 1.26855e-14 | 1.000000 | 1.26855e-14 | 1.000000 |
| rad55          | 5.30518e-15 | 1.000000 | 5.30518e-15 | 1.000000 |
| PAH1+H         | 4.64279e-15 | 1.000000 | 4.64279e-15 | 1.000000 |
| rad36          | 4.48714e-15 | 1.000000 | 4.48714e-15 | 1.000000 |
| rad22          | 3.79414e-15 | 1.000000 | 3.79414e-15 | 1.000000 |
| rad52          | 8.44781e-16 | 1.000000 | 8.44781e-16 | 1.000000 |
| rad15          | 6.57436e-16 | 1.000000 | 6.57436e-16 | 1.000000 |
| rad14          | 6.02586e-16 | 1.000000 | 6.02586e-16 | 1.000000 |
| rad33          | 5.76387e-16 | 1.000000 | 5.76387e-16 | 1.000000 |
| rad27          | 5.12347e-16 | 1.000000 | 5.12347e-16 | 1.000000 |
| rad58          | 4.75669e-16 | 1.000000 | 4.75669e-16 | 1.000000 |
| rad51          | 2.81108e-16 | 1.000000 | 2.81108e-16 | 1.000000 |
| rad25          | 2.41529e-16 | 1.000000 | 2.41529e-16 | 1.000000 |
| rad34          | 2.28539e-16 | 1.000000 | 2.28539e-16 | 1.000000 |
| rad41          | 6.34693e-17 | 1.000000 | 6.34693e-17 | 1.000000 |
| rad42          | 4.36163e-17 | 1.000000 | 4.36163e-17 | 1.000000 |
| rad65          | 6.45973e-18 | 1.000000 | 6.45973e-18 | 1.000000 |
| rad53          | 1.28752e-19 | 1.000000 | 1.28752e-19 | 1.000000 |
| rad5           | 7.22915e-20 | 1.000000 | 7.22915e-20 | 1.000000 |
| rad64          | 2.21589e-20 | 1.000000 | 2.21589e-20 | 1.000000 |
| rad31          | 2.05933e-20 | 1.000000 | 2.05933e-20 | 1.000000 |
| rad20          | 2.01105e-20 | 1.000000 | 2.01105e-20 | 1.000000 |
| rad18          | 1.63937e-20 | 1.000000 | 1.63937e-20 | 1.000000 |
| rad21          | 1.34046e-20 | 1.000000 | 1.34046e-20 | 1.000000 |
| rad12          | 5.71004e-21 | 1.000000 | 5.71004e-21 | 1.000000 |
| rad61          | 1.38344e-21 | 1.000000 | 1.38344e-21 | 1.000000 |
| rad19anti      | 7.37435e-22 | 1.000000 | 7.37435e-22 | 1.000000 |
| rad24          | 6.21212e-22 | 1.000000 | 6.21212e-22 | 1.000000 |
| rad56          | 4.64124e-23 | 1.000000 | 4.64124e-23 | 1.000000 |
| rad68syn       | 4.40525e-24 | 1.000000 | 4.40525e-24 | 1.000000 |
| rad68anti      | 3.46908e-24 | 1.000000 | 3.46908e-24 | 1.000000 |
| rad47          | 8.36830e-26 | 1.000000 | 8.36830e-26 | 1.000000 |
| rad40syn       | 5.33221e-27 | 1.000000 | 5.33221e-27 | 1.000000 |
| rad40anti      | 4.27202e-27 | 1.000000 | 4.27202e-27 | 1.000000 |
| rad73          | 2.48815e-28 | 1.000000 | 2.48815e-28 | 1.000000 |
| PAH8+H         | 1.65250e-28 | 1.000000 | 1.65250e-28 | 1.000000 |
| rad71          | 1.61242e-31 | 1.000000 | 1.61242e-31 | 1.000000 |
| rad19syn       | 8.89198e-36 | 1.000000 | 8.89198e-36 | 1.000000 |
| rad8           | 9.69980e-56 | 1.000000 | 9.69980e-56 | 1.000000 |

1.00000000 Pa, 180.000000 K

=====

| Rate constant             | True (fraction)        | Effective (fraction)   |
|---------------------------|------------------------|------------------------|
| Total                     | 1.12884e-14 (1.00)     | 1.12884e-14 (1.00)     |
| Formation of rad19        | 1.12881e-14 (1.000)    | 1.12881e-14 (1.000)    |
| H-abstraction to cyc2enyl | 2.75916e-19 (2.44e-05) | 2.75916e-19 (2.44e-05) |
| H-abstraction to cyclenyl | 2.39955e-23 (2.13e-09) | 2.39955e-23 (2.13e-09) |

| species                       | PYtrue      | Cumul    | PYeffective | Cumul    |
|-------------------------------|-------------|----------|-------------|----------|
| Indene+H                      | 0.999639    | 0.999639 | 0.999639    | 0.999639 |
| PhCHCCH2+H                    | 0.000318790 | 0.999957 | 0.000318790 | 0.999957 |
| Benzene+cycloprop-2-enylidene | 2.44424e-05 | 0.999982 | 2.44424e-05 | 0.999982 |
| PhCCH+CH3                     | 5.55811e-06 | 0.999987 | 5.55811e-06 | 0.999987 |
| C2H2+PhCH2                    | 4.13716e-06 | 0.999991 | 4.13716e-06 | 0.999991 |
| PhCCCH3+H                     | 3.31876e-06 | 0.999995 | 3.31876e-06 | 0.999995 |
| Ph+MeAc                       | 2.69827e-06 | 0.999998 | 2.69827e-06 | 0.999998 |
| rad67                         | 8.02563e-07 | 0.999998 | 8.02563e-07 | 0.999998 |
| rad6                          | 6.06607e-07 | 0.999999 | 6.06607e-07 | 0.999999 |
| rad35                         | 3.47718e-07 | 0.999999 | 3.47718e-07 | 0.999999 |
| Ph+Allene                     | 2.43427e-07 | 1.000000 | 2.43427e-07 | 1.000000 |
| PhCH2CCH+H                    | 3.30905e-08 | 1.000000 | 3.30905e-08 | 1.000000 |
| PAH7+H                        | 2.90074e-08 | 1.000000 | 2.90074e-08 | 1.000000 |
| rad37                         | 9.13936e-09 | 1.000000 | 9.13936e-09 | 1.000000 |
| rad39                         | 8.17446e-09 | 1.000000 | 8.17446e-09 | 1.000000 |
| rad30                         | 6.54147e-09 | 1.000000 | 6.54147e-09 | 1.000000 |
| Benzene+cycloprop-1-enylidene | 2.12567e-09 | 1.000000 | 2.12567e-09 | 1.000000 |
| rad28                         | 7.10032e-10 | 1.000000 | 7.10032e-10 | 1.000000 |
| rad2                          | 6.56325e-10 | 1.000000 | 6.56325e-10 | 1.000000 |
| PAH9+H                        | 4.53510e-10 | 1.000000 | 4.53510e-10 | 1.000000 |
| rad38                         | 2.07680e-10 | 1.000000 | 2.07680e-10 | 1.000000 |
| rad7                          | 8.95448e-11 | 1.000000 | 8.95448e-11 | 1.000000 |
| rad26                         | 8.34528e-11 | 1.000000 | 8.34528e-11 | 1.000000 |
| rad10                         | 4.49593e-11 | 1.000000 | 4.49593e-11 | 1.000000 |



|                |             |          |             |          |
|----------------|-------------|----------|-------------|----------|
| rad1           | 4.38236e-11 | 1.000000 | 4.38236e-11 | 1.000000 |
| rad60syn       | 3.50202e-11 | 1.000000 | 3.50202e-11 | 1.000000 |
| rad11          | 2.69239e-11 | 1.000000 | 2.69239e-11 | 1.000000 |
| PAH10+CH3      | 2.29878e-11 | 1.000000 | 2.29878e-11 | 1.000000 |
| PAH3+H         | 1.82214e-11 | 1.000000 | 1.82214e-11 | 1.000000 |
| rad60anti      | 1.74244e-11 | 1.000000 | 1.74244e-11 | 1.000000 |
| rad46          | 1.27438e-11 | 1.000000 | 1.27438e-11 | 1.000000 |
| PhcycC3H3_A+H  | 1.01496e-11 | 1.000000 | 1.01496e-11 | 1.000000 |
| rad3           | 5.92017e-12 | 1.000000 | 5.92017e-12 | 1.000000 |
| rad59          | 3.62540e-12 | 1.000000 | 3.62540e-12 | 1.000000 |
| rad4           | 3.03193e-12 | 1.000000 | 3.03193e-12 | 1.000000 |
| rad23          | 2.44395e-12 | 1.000000 | 2.44395e-12 | 1.000000 |
| rad43          | 8.95824e-13 | 1.000000 | 8.95824e-13 | 1.000000 |
| rad9           | 8.01035e-13 | 1.000000 | 8.01035e-13 | 1.000000 |
| rad54          | 6.39727e-13 | 1.000000 | 6.39727e-13 | 1.000000 |
| rad13          | 2.91016e-13 | 1.000000 | 2.91016e-13 | 1.000000 |
| rad62          | 1.89704e-13 | 1.000000 | 1.89704e-13 | 1.000000 |
| rad50          | 1.19085e-13 | 1.000000 | 1.19085e-13 | 1.000000 |
| Phenyl+cycC3H4 | 8.44565e-14 | 1.000000 | 0.000000    | 1.000000 |
| rad45          | 5.70600e-14 | 1.000000 | 5.70600e-14 | 1.000000 |
| PhcycC3H3_B+H  | 2.84733e-14 | 1.000000 | 2.84733e-14 | 1.000000 |
| rad70          | 1.56615e-14 | 1.000000 | 1.56615e-14 | 1.000000 |
| rad55          | 6.59574e-15 | 1.000000 | 6.59574e-15 | 1.000000 |
| PAH1+H         | 6.03205e-15 | 1.000000 | 6.03205e-15 | 1.000000 |
| rad36          | 3.52471e-15 | 1.000000 | 3.52471e-15 | 1.000000 |
| rad22          | 2.94164e-15 | 1.000000 | 2.94164e-15 | 1.000000 |
| rad52          | 9.99973e-16 | 1.000000 | 9.99973e-16 | 1.000000 |
| rad58          | 5.80912e-16 | 1.000000 | 5.80912e-16 | 1.000000 |
| rad14          | 5.03547e-16 | 1.000000 | 5.03547e-16 | 1.000000 |
| rad33          | 4.87124e-16 | 1.000000 | 4.87124e-16 | 1.000000 |
| rad15          | 4.70104e-16 | 1.000000 | 4.70104e-16 | 1.000000 |
| rad27          | 4.29917e-16 | 1.000000 | 4.29917e-16 | 1.000000 |
| rad51          | 3.46004e-16 | 1.000000 | 3.46004e-16 | 1.000000 |
| rad34          | 3.01920e-16 | 1.000000 | 3.01920e-16 | 1.000000 |
| rad25          | 2.02664e-16 | 1.000000 | 2.02664e-16 | 1.000000 |
| rad41          | 8.47261e-17 | 1.000000 | 8.47261e-17 | 1.000000 |
| rad42          | 5.70036e-17 | 1.000000 | 5.70036e-17 | 1.000000 |
| rad65          | 8.08329e-18 | 1.000000 | 8.08329e-18 | 1.000000 |
| rad53          | 2.40426e-19 | 1.000000 | 2.40426e-19 | 1.000000 |
| rad5           | 5.49713e-20 | 1.000000 | 5.49713e-20 | 1.000000 |
| rad64          | 4.64268e-20 | 1.000000 | 4.64268e-20 | 1.000000 |
| rad31          | 1.81265e-20 | 1.000000 | 1.81265e-20 | 1.000000 |
| rad20          | 1.69276e-20 | 1.000000 | 1.69276e-20 | 1.000000 |
| rad18          | 1.28676e-20 | 1.000000 | 1.28676e-20 | 1.000000 |
| rad21          | 1.13155e-20 | 1.000000 | 1.13155e-20 | 1.000000 |
| rad12          | 4.14141e-21 | 1.000000 | 4.14141e-21 | 1.000000 |
| rad61          | 3.95480e-21 | 1.000000 | 3.95480e-21 | 1.000000 |
| rad19anti      | 5.34744e-22 | 1.000000 | 5.34744e-22 | 1.000000 |
| rad24          | 4.91702e-22 | 1.000000 | 4.91702e-22 | 1.000000 |
| rad56          | 1.54663e-22 | 1.000000 | 1.54663e-22 | 1.000000 |
| rad68syn       | 1.56623e-23 | 1.000000 | 1.56623e-23 | 1.000000 |
| rad68anti      | 1.22573e-23 | 1.000000 | 1.22573e-23 | 1.000000 |
| rad47          | 8.49402e-26 | 1.000000 | 8.49402e-26 | 1.000000 |
| rad40syn       | 3.02625e-26 | 1.000000 | 3.02625e-26 | 1.000000 |
| rad40anti      | 2.43128e-26 | 1.000000 | 2.43128e-26 | 1.000000 |
| rad73          | 1.31672e-27 | 1.000000 | 1.31672e-27 | 1.000000 |
| PAH8+H         | 1.30270e-27 | 1.000000 | 1.30270e-27 | 1.000000 |
| rad71          | 1.44214e-30 | 1.000000 | 1.44214e-30 | 1.000000 |
| rad19syn       | 2.57213e-35 | 1.000000 | 2.57213e-35 | 1.000000 |
| rad8           | 1.29492e-55 | 1.000000 | 1.29492e-55 | 1.000000 |

1.00000000 Pa, 190.000000 K

=====

| Rate constant             | True (fraction)        | Effective (fraction)   |
|---------------------------|------------------------|------------------------|
| Total                     | 1.32132e-14 (1.00 )    | 1.32132e-14 (1.00 )    |
| Formation of rad19        | 1.32126e-14 (1.000 )   | 1.32126e-14 (1.000 )   |
| H-abstraction to cyc2enyl | 5.62053e-19 (4.25e-05) | 5.62053e-19 (4.25e-05) |
| H-abstraction to cyc1enyl | 8.18073e-23 (6.19e-09) | 8.18073e-23 (6.19e-09) |

| species                       | PYtrue      | Cumul    | PYeffective | Cumul    |
|-------------------------------|-------------|----------|-------------|----------|
| Indene+H                      | 0.999608    | 0.999608 | 0.999608    | 0.999608 |
| PhCHCCH2+H                    | 0.000330907 | 0.999939 | 0.000330907 | 0.999939 |
| Benzene+cycloprop-2-enylidene | 4.25373e-05 | 0.999982 | 4.25373e-05 | 0.999982 |
| PhCCH+CH3                     | 5.79452e-06 | 0.999988 | 5.79452e-06 | 0.999988 |
| C2H2+PhCH2                    | 4.37580e-06 | 0.999992 | 4.37580e-06 | 0.999992 |
| PhCCCH3+H                     | 3.46984e-06 | 0.999996 | 3.46984e-06 | 0.999996 |
| Ph+MeAc                       | 2.85106e-06 | 0.999998 | 2.85106e-06 | 0.999998 |
| rad67                         | 8.45148e-07 | 0.999999 | 8.45148e-07 | 0.999999 |

|                               |             |          |             |          |
|-------------------------------|-------------|----------|-------------|----------|
| rad6                          | 5.09396e-07 | 1.000000 | 5.09396e-07 | 1.000000 |
| rad35                         | 3.65383e-07 | 1.00000  | 3.65383e-07 | 1.00000  |
| Ph+Allene                     | 2.67147e-07 | 1.00000  | 2.67147e-07 | 1.00000  |
| PhCH2CCH+H                    | 3.68383e-08 | 1.00000  | 3.68383e-08 | 1.00000  |
| PAH7+H                        | 3.14663e-08 | 1.00000  | 3.14663e-08 | 1.00000  |
| rad37                         | 9.78457e-09 | 1.00000  | 9.78457e-09 | 1.00000  |
| rad39                         | 8.86765e-09 | 1.00000  | 8.86765e-09 | 1.00000  |
| rad30                         | 6.89365e-09 | 1.00000  | 6.89365e-09 | 1.00000  |
| Benzene+cycloprop-1-enylidene | 6.19133e-09 | 1.00000  | 6.19133e-09 | 1.00000  |
| rad28                         | 5.93871e-10 | 1.00000  | 5.93871e-10 | 1.00000  |
| rad2                          | 5.50293e-10 | 1.00000  | 5.50293e-10 | 1.00000  |
| PAH9+H                        | 4.91037e-10 | 1.00000  | 4.91037e-10 | 1.00000  |
| rad38                         | 2.26453e-10 | 1.00000  | 2.26453e-10 | 1.00000  |
| rad7                          | 7.46866e-11 | 1.00000  | 7.46866e-11 | 1.00000  |
| rad26                         | 7.02063e-11 | 1.00000  | 7.02063e-11 | 1.00000  |
| rad60syn                      | 3.77478e-11 | 1.00000  | 3.77478e-11 | 1.00000  |
| rad10                         | 3.76086e-11 | 1.00000  | 3.76086e-11 | 1.00000  |
| rad1                          | 3.70030e-11 | 1.00000  | 3.70030e-11 | 1.00000  |
| PAH10+CH3                     | 2.66067e-11 | 1.00000  | 2.66067e-11 | 1.00000  |
| rad11                         | 2.24064e-11 | 1.00000  | 2.24064e-11 | 1.00000  |
| PAH3+H                        | 2.02193e-11 | 1.00000  | 2.02193e-11 | 1.00000  |
| rad60anti                     | 1.88196e-11 | 1.00000  | 1.88196e-11 | 1.00000  |
| rad46                         | 1.40124e-11 | 1.00000  | 1.40124e-11 | 1.00000  |
| PhcycC3H3_A+H                 | 1.32959e-11 | 1.00000  | 1.32959e-11 | 1.00000  |
| rad3                          | 4.94457e-12 | 1.00000  | 4.94457e-12 | 1.00000  |
| rad59                         | 4.00397e-12 | 1.00000  | 4.00397e-12 | 1.00000  |
| rad4                          | 2.53710e-12 | 1.00000  | 2.53710e-12 | 1.00000  |
| rad23                         | 1.93513e-12 | 1.00000  | 1.93513e-12 | 1.00000  |
| rad43                         | 1.01657e-12 | 1.00000  | 1.01657e-12 | 1.00000  |
| rad54                         | 7.61722e-13 | 1.00000  | 7.61722e-13 | 1.00000  |
| rad9                          | 5.93338e-13 | 1.00000  | 5.93338e-13 | 1.00000  |
| rad13                         | 2.43883e-13 | 1.00000  | 2.43883e-13 | 1.00000  |
| rad62                         | 2.16568e-13 | 1.00000  | 2.16568e-13 | 1.00000  |
| rad50                         | 1.37146e-13 | 1.00000  | 1.37146e-13 | 1.00000  |
| Phenyl+cycC3H4                | 1.24603e-13 | 1.00000  | 0.00000     | 1.00000  |
| PhcycC3H3_B+H                 | 5.08905e-14 | 1.00000  | 5.08905e-14 | 1.00000  |
| rad45                         | 4.48372e-14 | 1.00000  | 4.48372e-14 | 1.00000  |
| rad70                         | 1.94569e-14 | 1.00000  | 1.94569e-14 | 1.00000  |
| rad55                         | 8.24456e-15 | 1.00000  | 8.24456e-15 | 1.00000  |
| PAH1+H                        | 7.89810e-15 | 1.00000  | 7.89810e-15 | 1.00000  |
| rad36                         | 2.77643e-15 | 1.00000  | 2.77643e-15 | 1.00000  |
| rad22                         | 2.28799e-15 | 1.00000  | 2.28799e-15 | 1.00000  |
| rad52                         | 1.19213e-15 | 1.00000  | 1.19213e-15 | 1.00000  |
| rad58                         | 7.16267e-16 | 1.00000  | 7.16267e-16 | 1.00000  |
| rad51                         | 4.29655e-16 | 1.00000  | 4.29655e-16 | 1.00000  |
| rad14                         | 4.20133e-16 | 1.00000  | 4.20133e-16 | 1.00000  |
| rad33                         | 4.10891e-16 | 1.00000  | 4.10891e-16 | 1.00000  |
| rad34                         | 4.01510e-16 | 1.00000  | 4.01510e-16 | 1.00000  |
| rad27                         | 3.60116e-16 | 1.00000  | 3.60116e-16 | 1.00000  |
| rad15                         | 3.46748e-16 | 1.00000  | 3.46748e-16 | 1.00000  |
| rad25                         | 1.69787e-16 | 1.00000  | 1.69787e-16 | 1.00000  |
| rad41                         | 1.13841e-16 | 1.00000  | 1.13841e-16 | 1.00000  |
| rad42                         | 7.49535e-17 | 1.00000  | 7.49535e-17 | 1.00000  |
| rad65                         | 1.02073e-17 | 1.00000  | 1.02073e-17 | 1.00000  |
| rad53                         | 4.38192e-19 | 1.00000  | 4.38192e-19 | 1.00000  |
| rad64                         | 9.35179e-20 | 1.00000  | 9.35179e-20 | 1.00000  |
| rad5                          | 4.20109e-20 | 1.00000  | 4.20109e-20 | 1.00000  |
| rad31                         | 1.59898e-20 | 1.00000  | 1.59898e-20 | 1.00000  |
| rad20                         | 1.43176e-20 | 1.00000  | 1.43176e-20 | 1.00000  |
| rad61                         | 1.04331e-20 | 1.00000  | 1.04331e-20 | 1.00000  |
| rad18                         | 1.01712e-20 | 1.00000  | 1.01712e-20 | 1.00000  |
| rad21                         | 9.59903e-21 | 1.00000  | 9.59903e-21 | 1.00000  |
| rad12                         | 3.09911e-21 | 1.00000  | 3.09911e-21 | 1.00000  |
| rad56                         | 4.67356e-22 | 1.00000  | 4.67356e-22 | 1.00000  |
| rad19anti                     | 4.00524e-22 | 1.00000  | 4.00524e-22 | 1.00000  |
| rad24                         | 3.90244e-22 | 1.00000  | 3.90244e-22 | 1.00000  |
| rad68syn                      | 4.99606e-23 | 1.00000  | 4.99606e-23 | 1.00000  |
| rad68anti                     | 3.88422e-23 | 1.00000  | 3.88422e-23 | 1.00000  |
| rad40syn                      | 1.45739e-25 | 1.00000  | 1.45739e-25 | 1.00000  |
| rad40anti                     | 1.17291e-25 | 1.00000  | 1.17291e-25 | 1.00000  |
| rad47                         | 8.71327e-26 | 1.00000  | 8.71327e-26 | 1.00000  |
| PAH8+H                        | 8.42165e-27 | 1.00000  | 8.42165e-27 | 1.00000  |
| rad73                         | 6.02907e-27 | 1.00000  | 6.02907e-27 | 1.00000  |
| rad71                         | 1.04743e-29 | 1.00000  | 1.04743e-29 | 1.00000  |
| rad19syn                      | 7.83214e-35 | 1.00000  | 7.83214e-35 | 1.00000  |
| rad8                          | 1.75203e-55 | 1.00000  | 1.75203e-55 | 1.00000  |

1.00000000 Pa, 200.000000 K

=====

Rate constant | True (fraction) | Effective (fraction)

|                           |                        |                        |
|---------------------------|------------------------|------------------------|
| Total                     | 1.52621e-14 (1.00 )    | 1.52621e-14 (1.00 )    |
| Formation of rad19        | 1.52610e-14 (1.000 )   | 1.52610e-14 (1.000 )   |
| H-abstraction to cyc2enyl | 1.06427e-18 (6.97e-05) | 1.06427e-18 (6.97e-05) |
| H-abstraction to cyclenyl | 2.46309e-22 (1.61e-08) | 2.46309e-22 (1.61e-08) |

| species                       | PYtrue      | Cumul    | PYeffective | Cumul    |
|-------------------------------|-------------|----------|-------------|----------|
| Indene+H                      | 0.999566    | 0.999566 | 0.999566    | 0.999566 |
| PhCHCCH2+H                    | 0.000344102 | 0.999910 | 0.000344102 | 0.999910 |
| Benzene+cycloprop-2-enylidene | 6.97330e-05 | 0.999980 | 6.97330e-05 | 0.999980 |
| PhCCH+CH3                     | 6.04960e-06 | 0.999986 | 6.04960e-06 | 0.999986 |
| C2H2+PhCH2                    | 4.63490e-06 | 0.999991 | 4.63490e-06 | 0.999991 |
| PhCCCH3+H                     | 3.63492e-06 | 0.999994 | 3.63492e-06 | 0.999994 |
| Ph+MeAc                       | 3.01986e-06 | 0.999997 | 3.01986e-06 | 0.999997 |
| rad67                         | 8.92226e-07 | 0.999998 | 8.92226e-07 | 0.999998 |
| rad6                          | 4.26756e-07 | 0.999999 | 4.26756e-07 | 0.999999 |
| rad35                         | 3.84871e-07 | 0.999999 | 3.84871e-07 | 0.999999 |
| Ph+Allene                     | 2.93809e-07 | 0.999999 | 2.93809e-07 | 0.999999 |
| PhCH2CCH+H                    | 4.11278e-08 | 0.999999 | 4.11278e-08 | 0.999999 |
| PAH7+H                        | 3.41773e-08 | 1.000000 | 3.41773e-08 | 1.000000 |
| Benzene+cycloprop-1-enylidene | 1.61386e-08 | 1.000000 | 1.61386e-08 | 1.000000 |
| rad37                         | 1.05101e-08 | 1.000000 | 1.05101e-08 | 1.000000 |
| rad39                         | 9.63126e-09 | 1.000000 | 9.63126e-09 | 1.000000 |
| rad30                         | 7.28304e-09 | 1.000000 | 7.28304e-09 | 1.000000 |
| PAH9+H                        | 5.33029e-10 | 1.000000 | 5.33029e-10 | 1.000000 |
| rad28                         | 4.95668e-10 | 1.000000 | 4.95668e-10 | 1.000000 |
| rad2                          | 4.60288e-10 | 1.000000 | 4.60288e-10 | 1.000000 |
| rad38                         | 2.47727e-10 | 1.000000 | 2.47727e-10 | 1.000000 |
| rad7                          | 6.21759e-11 | 1.000000 | 6.21759e-11 | 1.000000 |
| rad26                         | 5.89128e-11 | 1.000000 | 5.89128e-11 | 1.000000 |
| rad60syn                      | 4.08417e-11 | 1.000000 | 4.08417e-11 | 1.000000 |
| rad10                         | 3.13914e-11 | 1.000000 | 3.13914e-11 | 1.000000 |
| rad1                          | 3.11883e-11 | 1.000000 | 3.11883e-11 | 1.000000 |
| PAH10+CH3                     | 3.10127e-11 | 1.000000 | 3.10127e-11 | 1.000000 |
| PAH3+H                        | 2.25584e-11 | 1.000000 | 2.25584e-11 | 1.000000 |
| rad60anti                     | 2.04057e-11 | 1.000000 | 2.04057e-11 | 1.000000 |
| rad11                         | 1.86148e-11 | 1.000000 | 1.86148e-11 | 1.000000 |
| PhcycC3H3_A+H                 | 1.75117e-11 | 1.000000 | 1.75117e-11 | 1.000000 |
| rad46                         | 1.54583e-11 | 1.000000 | 1.54583e-11 | 1.000000 |
| rad59                         | 4.44477e-12 | 1.000000 | 4.44477e-12 | 1.000000 |
| rad3                          | 4.12156e-12 | 1.000000 | 4.12156e-12 | 1.000000 |
| rad4                          | 2.11920e-12 | 1.000000 | 2.11920e-12 | 1.000000 |
| rad23                         | 1.53401e-12 | 1.000000 | 1.53401e-12 | 1.000000 |
| rad43                         | 1.16024e-12 | 1.000000 | 1.16024e-12 | 1.000000 |
| rad54                         | 9.11169e-13 | 1.000000 | 9.11169e-13 | 1.000000 |
| rad9                          | 4.52053e-13 | 1.000000 | 4.52053e-13 | 1.000000 |
| rad62                         | 2.48547e-13 | 1.000000 | 2.48547e-13 | 1.000000 |
| rad13                         | 2.04003e-13 | 1.000000 | 2.04003e-13 | 1.000000 |
| Phenyl+cycC3H4                | 1.83626e-13 | 1.000000 | 0.000000    | 1.000000 |
| rad50                         | 1.58849e-13 | 1.000000 | 1.58849e-13 | 1.000000 |
| PhcycC3H3_B+H                 | 8.87579e-14 | 1.000000 | 8.87579e-14 | 1.000000 |
| rad45                         | 3.52996e-14 | 1.000000 | 3.52996e-14 | 1.000000 |
| rad70                         | 2.43210e-14 | 1.000000 | 2.43210e-14 | 1.000000 |
| PAH1+H                        | 1.04158e-14 | 1.000000 | 1.04158e-14 | 1.000000 |
| rad55                         | 1.03608e-14 | 1.000000 | 1.03608e-14 | 1.000000 |
| rad36                         | 2.19202e-15 | 1.000000 | 2.19202e-15 | 1.000000 |
| rad22                         | 1.78411e-15 | 1.000000 | 1.78411e-15 | 1.000000 |
| rad52                         | 1.43157e-15 | 1.000000 | 1.43157e-15 | 1.000000 |
| rad58                         | 8.91415e-16 | 1.000000 | 8.91415e-16 | 1.000000 |
| rad51                         | 5.38229e-16 | 1.000000 | 5.38229e-16 | 1.000000 |
| rad34                         | 5.37193e-16 | 1.000000 | 5.37193e-16 | 1.000000 |
| rad14                         | 3.49933e-16 | 1.000000 | 3.49933e-16 | 1.000000 |
| rad33                         | 3.45881e-16 | 1.000000 | 3.45881e-16 | 1.000000 |
| rad27                         | 3.01075e-16 | 1.000000 | 3.01075e-16 | 1.000000 |
| rad15                         | 2.63151e-16 | 1.000000 | 2.63151e-16 | 1.000000 |
| rad41                         | 1.53835e-16 | 1.000000 | 1.53835e-16 | 1.000000 |
| rad25                         | 1.41996e-16 | 1.000000 | 1.41996e-16 | 1.000000 |
| rad42                         | 9.90798e-17 | 1.000000 | 9.90798e-17 | 1.000000 |
| rad65                         | 1.30044e-17 | 1.000000 | 1.30044e-17 | 1.000000 |
| rad53                         | 7.82156e-19 | 1.000000 | 7.82156e-19 | 1.000000 |
| rad64                         | 1.82153e-19 | 1.000000 | 1.82153e-19 | 1.000000 |
| rad5                          | 3.22412e-20 | 1.000000 | 3.22412e-20 | 1.000000 |
| rad61                         | 2.57345e-20 | 1.000000 | 2.57345e-20 | 1.000000 |
| rad31                         | 1.41403e-20 | 1.000000 | 1.41403e-20 | 1.000000 |
| rad20                         | 1.21608e-20 | 1.000000 | 1.21608e-20 | 1.000000 |
| rad21                         | 8.17783e-21 | 1.000000 | 8.17783e-21 | 1.000000 |
| rad18                         | 8.08835e-21 | 1.000000 | 8.08835e-21 | 1.000000 |
| rad12                         | 2.38686e-21 | 1.000000 | 2.38686e-21 | 1.000000 |
| rad56                         | 1.30104e-21 | 1.000000 | 1.30104e-21 | 1.000000 |

|           |             |          |             |          |
|-----------|-------------|----------|-------------|----------|
| rad24     | 3.10402e-22 | 1.000000 | 3.10402e-22 | 1.000000 |
| rad19anti | 3.09220e-22 | 1.000000 | 3.09220e-22 | 1.000000 |
| rad68syn  | 1.45543e-22 | 1.000000 | 1.45543e-22 | 1.000000 |
| rad68anti | 1.12383e-22 | 1.000000 | 1.12383e-22 | 1.000000 |
| rad40syn  | 6.11189e-25 | 1.000000 | 6.11189e-25 | 1.000000 |
| rad40anti | 4.92237e-25 | 1.000000 | 4.92237e-25 | 1.000000 |
| rad47     | 9.04168e-26 | 1.000000 | 9.04168e-26 | 1.000000 |
| PAH8+H    | 4.59860e-26 | 1.000000 | 4.59860e-26 | 1.000000 |
| rad73     | 2.44283e-26 | 1.000000 | 2.44283e-26 | 1.000000 |
| rad71     | 6.36471e-29 | 1.000000 | 6.36471e-29 | 1.000000 |
| rad19syn  | 2.51002e-34 | 1.000000 | 2.51002e-34 | 1.000000 |
| rad8      | 2.40257e-55 | 1.000000 | 2.40257e-55 | 1.000000 |

1.00000000 Pa, 210.000000 K

| Rate constant             | True (fraction)        | Effective (fraction)   |
|---------------------------|------------------------|------------------------|
| Total                     | 1.74272e-14 (1.00 )    | 1.74272e-14 (1.00 )    |
| Formation of rad19        | 1.74253e-14 (1.000 )   | 1.74253e-14 (1.000 )   |
| H-abstraction to cyc2enyl | 1.89310e-18 (0.000109) | 1.89310e-18 (0.000109) |
| H-abstraction to cyclenyl | 6.66714e-22 (3.83e-08) | 6.66714e-22 (3.83e-08) |

| species                       | PYtrue      | Cumul    | PYeffective | Cumul    |
|-------------------------------|-------------|----------|-------------|----------|
| Indene+H                      | 0.999512    | 0.999512 | 0.999512    | 0.999512 |
| PhCHCCH2+H                    | 0.000358490 | 0.999871 | 0.000358490 | 0.999871 |
| Benzene+cycloprop-2-enylidene | 0.000108629 | 0.999979 | 0.000108629 | 0.999979 |
| PhCCH+CH3                     | 6.32538e-06 | 0.999986 | 6.32538e-06 | 0.999986 |
| C2H2+PhCH2                    | 4.91731e-06 | 0.999991 | 4.91731e-06 | 0.999991 |
| PhCCCH3+H                     | 3.81558e-06 | 0.999995 | 3.81558e-06 | 0.999995 |
| Ph+MeAc                       | 3.20669e-06 | 0.999998 | 3.20669e-06 | 0.999998 |
| rad67                         | 9.44351e-07 | 0.999999 | 9.44351e-07 | 0.999999 |
| rad35                         | 4.06401e-07 | 0.999999 | 4.06401e-07 | 0.999999 |
| rad6                          | 3.56652e-07 | 0.999999 | 3.56652e-07 | 0.999999 |
| Ph+Allene                     | 3.23909e-07 | 1.000000 | 3.23909e-07 | 1.000000 |
| PhCH2CCH+H                    | 4.60583e-08 | 1.000000 | 4.60583e-08 | 1.000000 |
| Benzene+cycloprop-1-enylidene | 3.82571e-08 | 1.000000 | 3.82571e-08 | 1.000000 |
| PAH7+H                        | 3.71808e-08 | 1.000000 | 3.71808e-08 | 1.000000 |
| rad37                         | 1.13277e-08 | 1.000000 | 1.13277e-08 | 1.000000 |
| rad39                         | 1.04764e-08 | 1.000000 | 1.04764e-08 | 1.000000 |
| rad30                         | 7.71445e-09 | 1.000000 | 7.71445e-09 | 1.000000 |
| PAH9+H                        | 5.80219e-10 | 1.000000 | 5.80219e-10 | 1.000000 |
| rad28                         | 4.12790e-10 | 1.000000 | 4.12790e-10 | 1.000000 |
| rad2                          | 3.84057e-10 | 1.000000 | 3.84057e-10 | 1.000000 |
| rad38                         | 2.71940e-10 | 1.000000 | 2.71940e-10 | 1.000000 |
| rad7                          | 5.16560e-11 | 1.000000 | 5.16560e-11 | 1.000000 |
| rad26                         | 4.93078e-11 | 1.000000 | 4.93078e-11 | 1.000000 |
| rad60syn                      | 4.43609e-11 | 1.000000 | 4.43609e-11 | 1.000000 |
| PAH10+CH3                     | 3.64009e-11 | 1.000000 | 3.64009e-11 | 1.000000 |
| rad1                          | 2.62399e-11 | 1.000000 | 2.62399e-11 | 1.000000 |
| rad10                         | 2.61429e-11 | 1.000000 | 2.61429e-11 | 1.000000 |
| PAH3+H                        | 2.53072e-11 | 1.000000 | 2.53072e-11 | 1.000000 |
| PhcycC3H3_A+H                 | 2.31693e-11 | 1.000000 | 2.31693e-11 | 1.000000 |
| rad60anti                     | 2.22139e-11 | 1.000000 | 2.22139e-11 | 1.000000 |
| rad46                         | 1.71134e-11 | 1.000000 | 1.71134e-11 | 1.000000 |
| rad11                         | 1.54357e-11 | 1.000000 | 1.54357e-11 | 1.000000 |
| rad59                         | 4.95985e-12 | 1.000000 | 4.95985e-12 | 1.000000 |
| rad3                          | 3.42838e-12 | 1.000000 | 3.42838e-12 | 1.000000 |
| rad4                          | 1.76680e-12 | 1.000000 | 1.76680e-12 | 1.000000 |
| rad43                         | 1.33179e-12 | 1.000000 | 1.33179e-12 | 1.000000 |
| rad23                         | 1.21701e-12 | 1.000000 | 1.21701e-12 | 1.000000 |
| rad54                         | 1.09505e-12 | 1.000000 | 1.09505e-12 | 1.000000 |
| rad9                          | 3.53540e-13 | 1.000000 | 3.53540e-13 | 1.000000 |
| rad62                         | 2.86731e-13 | 1.000000 | 2.86731e-13 | 1.000000 |
| Phenyl+cycC3H4                | 2.70226e-13 | 1.000000 | 0.000000    | 1.000000 |
| rad50                         | 1.85063e-13 | 1.000000 | 1.85063e-13 | 1.000000 |
| rad13                         | 1.70307e-13 | 1.000000 | 1.70307e-13 | 1.000000 |
| PhcycC3H3_B+H                 | 1.51569e-13 | 1.000000 | 1.51569e-13 | 1.000000 |
| rad70                         | 3.05807e-14 | 1.000000 | 3.05807e-14 | 1.000000 |
| rad45                         | 2.78323e-14 | 1.000000 | 2.78323e-14 | 1.000000 |
| PAH1+H                        | 1.38242e-14 | 1.000000 | 1.38242e-14 | 1.000000 |
| rad55                         | 1.30872e-14 | 1.000000 | 1.30872e-14 | 1.000000 |
| rad36                         | 1.73392e-15 | 1.000000 | 1.73392e-15 | 1.000000 |
| rad52                         | 1.73168e-15 | 1.000000 | 1.73168e-15 | 1.000000 |
| rad22                         | 1.39398e-15 | 1.000000 | 1.39398e-15 | 1.000000 |
| rad58                         | 1.11927e-15 | 1.000000 | 1.11927e-15 | 1.000000 |
| rad34                         | 7.22583e-16 | 1.000000 | 7.22583e-16 | 1.000000 |
| rad51                         | 6.80016e-16 | 1.000000 | 6.80016e-16 | 1.000000 |
| rad14                         | 2.90922e-16 | 1.000000 | 2.90922e-16 | 1.000000 |
| rad33                         | 2.90538e-16 | 1.000000 | 2.90538e-16 | 1.000000 |

|           |             |          |             |          |
|-----------|-------------|----------|-------------|----------|
| rad27     | 2.51212e-16 | 1.000000 | 2.51212e-16 | 1.000000 |
| rad41     | 2.08877e-16 | 1.000000 | 2.08877e-16 | 1.000000 |
| rad15     | 2.05057e-16 | 1.000000 | 2.05057e-16 | 1.000000 |
| rad42     | 1.31558e-16 | 1.000000 | 1.31558e-16 | 1.000000 |
| rad25     | 1.18532e-16 | 1.000000 | 1.18532e-16 | 1.000000 |
| rad65     | 1.67093e-17 | 1.000000 | 1.67093e-17 | 1.000000 |
| rad53     | 1.37084e-18 | 1.000000 | 1.37084e-18 | 1.000000 |
| rad64     | 3.44623e-19 | 1.000000 | 3.44623e-19 | 1.000000 |
| rad61     | 5.99672e-20 | 1.000000 | 5.99672e-20 | 1.000000 |
| rad5      | 2.48303e-20 | 1.000000 | 2.48303e-20 | 1.000000 |
| rad31     | 1.25410e-20 | 1.000000 | 1.25410e-20 | 1.000000 |
| rad20     | 1.03669e-20 | 1.000000 | 1.03669e-20 | 1.000000 |
| rad21     | 6.99338e-21 | 1.000000 | 6.99338e-21 | 1.000000 |
| rad18     | 6.46558e-21 | 1.000000 | 6.46558e-21 | 1.000000 |
| rad56     | 3.37870e-21 | 1.000000 | 3.37870e-21 | 1.000000 |
| rad12     | 1.88825e-21 | 1.000000 | 1.88825e-21 | 1.000000 |
| rad68syn  | 3.92698e-22 | 1.000000 | 3.92698e-22 | 1.000000 |
| rad68anti | 3.01134e-22 | 1.000000 | 3.01134e-22 | 1.000000 |
| rad24     | 2.47342e-22 | 1.000000 | 2.47342e-22 | 1.000000 |
| rad19anti | 2.45925e-22 | 1.000000 | 2.45925e-22 | 1.000000 |
| rad40syn  | 2.27833e-24 | 1.000000 | 2.27833e-24 | 1.000000 |
| rad40anti | 1.83452e-24 | 1.000000 | 1.83452e-24 | 1.000000 |
| PAH8+H    | 2.17046e-25 | 1.000000 | 2.17046e-25 | 1.000000 |
| rad47     | 9.50068e-26 | 1.000000 | 9.50068e-26 | 1.000000 |
| rad73     | 8.91403e-26 | 1.000000 | 8.91403e-26 | 1.000000 |
| rad71     | 3.31075e-28 | 1.000000 | 3.31075e-28 | 1.000000 |
| rad19syn  | 8.46112e-34 | 1.000000 | 8.46112e-34 | 1.000000 |
| rad8      | 3.33989e-55 | 1.000000 | 3.33989e-55 | 1.000000 |

1.00000000 Pa, 220.000000 K

| Rate constant             | True (fraction)        | Effective (fraction)   |
|---------------------------|------------------------|------------------------|
| Total                     | 1.97009e-14 (1.00 )    | 1.97009e-14 (1.00 )    |
| Formation of rad19        | 1.96977e-14 (1.000 )   | 1.96977e-14 (1.000 )   |
| H-abstraction to cyc2enyl | 3.19064e-18 (0.000162) | 3.19064e-18 (0.000162) |
| H-abstraction to cyclenyl | 1.64627e-21 (8.36e-08) | 1.64627e-21 (8.36e-08) |

| species                       | PYtrue      | Cumul    | PYeffective | Cumul    |
|-------------------------------|-------------|----------|-------------|----------|
| Indene+H                      | 0.999442    | 0.999442 | 0.999442    | 0.999442 |
| PhCHCCH2+H                    | 0.000374189 | 0.999816 | 0.000374189 | 0.999816 |
| Benzene+cycloprop-2-enylidene | 0.000161954 | 0.999978 | 0.000161954 | 0.999978 |
| PhCCH+CH3                     | 6.62401e-06 | 0.999985 | 6.62401e-06 | 0.999985 |
| C2H2+PhCH2                    | 5.22610e-06 | 0.999990 | 5.22610e-06 | 0.999990 |
| PhCCCH3+H                     | 4.01352e-06 | 0.999994 | 4.01352e-06 | 0.999994 |
| Ph+MeAc                       | 3.41378e-06 | 0.999997 | 3.41378e-06 | 0.999997 |
| rad67                         | 1.00213e-06 | 0.999998 | 1.00213e-06 | 0.999998 |
| rad35                         | 4.30212e-07 | 0.999999 | 4.30212e-07 | 0.999999 |
| Ph+Allene                     | 3.58016e-07 | 0.999999 | 3.58016e-07 | 0.999999 |
| rad6                          | 2.97321e-07 | 1.000000 | 2.97321e-07 | 1.000000 |
| Benzene+cycloprop-1-enylidene | 8.35632e-08 | 1.000000 | 8.35632e-08 | 1.000000 |
| PhCH2CCH+H                    | 5.17460e-08 | 1.000000 | 5.17460e-08 | 1.000000 |
| PAH7+H                        | 4.05213e-08 | 1.000000 | 4.05213e-08 | 1.000000 |
| rad37                         | 1.22508e-08 | 1.000000 | 1.22508e-08 | 1.000000 |
| rad39                         | 1.14152e-08 | 1.000000 | 1.14152e-08 | 1.000000 |
| rad30                         | 8.19315e-09 | 1.000000 | 8.19315e-09 | 1.000000 |
| PAH9+H                        | 6.33444e-10 | 1.000000 | 6.33444e-10 | 1.000000 |
| rad28                         | 3.42983e-10 | 1.000000 | 3.42983e-10 | 1.000000 |
| rad2                          | 3.19647e-10 | 1.000000 | 3.19647e-10 | 1.000000 |
| rad38                         | 2.99605e-10 | 1.000000 | 2.99605e-10 | 1.000000 |
| rad60syn                      | 4.83734e-11 | 1.000000 | 4.83734e-11 | 1.000000 |
| PAH10+CH3                     | 4.30156e-11 | 1.000000 | 4.30156e-11 | 1.000000 |
| rad7                          | 4.28251e-11 | 1.000000 | 4.28251e-11 | 1.000000 |
| rad26                         | 4.11605e-11 | 1.000000 | 4.11605e-11 | 1.000000 |
| PhcycC3H3_A+H                 | 3.07683e-11 | 1.000000 | 3.07683e-11 | 1.000000 |
| PAH3+H                        | 2.85487e-11 | 1.000000 | 2.85487e-11 | 1.000000 |
| rad60anti                     | 2.42804e-11 | 1.000000 | 2.42804e-11 | 1.000000 |
| rad1                          | 2.20367e-11 | 1.000000 | 2.20367e-11 | 1.000000 |
| rad10                         | 2.17212e-11 | 1.000000 | 2.17212e-11 | 1.000000 |
| rad46                         | 1.90153e-11 | 1.000000 | 1.90153e-11 | 1.000000 |
| rad11                         | 1.27742e-11 | 1.000000 | 1.27742e-11 | 1.000000 |
| rad59                         | 5.56362e-12 | 1.000000 | 5.56362e-12 | 1.000000 |
| rad3                          | 2.84564e-12 | 1.000000 | 2.84564e-12 | 1.000000 |
| rad43                         | 1.53722e-12 | 1.000000 | 1.53722e-12 | 1.000000 |
| rad4                          | 1.47012e-12 | 1.000000 | 1.47012e-12 | 1.000000 |
| rad54                         | 1.32213e-12 | 1.000000 | 1.32213e-12 | 1.000000 |
| rad23                         | 9.65994e-13 | 1.000000 | 9.65994e-13 | 1.000000 |
| Phenyl+cycC3H4                | 3.96956e-13 | 1.000000 | 0.00000     | 1.000000 |
| rad62                         | 3.32441e-13 | 1.000000 | 3.32441e-13 | 1.000000 |

|               |             |          |             |          |
|---------------|-------------|----------|-------------|----------|
| rad9          | 2.83375e-13 | 1.000000 | 2.83375e-13 | 1.000000 |
| PhcycC3H3_B+H | 2.54075e-13 | 1.000000 | 2.54075e-13 | 1.000000 |
| rad50         | 2.16874e-13 | 1.000000 | 2.16874e-13 | 1.000000 |
| rad13         | 1.41885e-13 | 1.000000 | 1.41885e-13 | 1.000000 |
| rad70         | 3.86630e-14 | 1.000000 | 3.86630e-14 | 1.000000 |
| rad45         | 2.19701e-14 | 1.000000 | 2.19701e-14 | 1.000000 |
| PAH1+H        | 1.84506e-14 | 1.000000 | 1.84506e-14 | 1.000000 |
| rad55         | 1.66103e-14 | 1.000000 | 1.66103e-14 | 1.000000 |
| rad52         | 2.10973e-15 | 1.000000 | 2.10973e-15 | 1.000000 |
| rad58         | 1.41702e-15 | 1.000000 | 1.41702e-15 | 1.000000 |
| rad36         | 1.37379e-15 | 1.000000 | 1.37379e-15 | 1.000000 |
| rad22         | 1.09086e-15 | 1.000000 | 1.09086e-15 | 1.000000 |
| rad34         | 9.76409e-16 | 1.000000 | 9.76409e-16 | 1.000000 |
| rad51         | 8.66163e-16 | 1.000000 | 8.66163e-16 | 1.000000 |
| rad41         | 2.84709e-16 | 1.000000 | 2.84709e-16 | 1.000000 |
| rad33         | 2.43522e-16 | 1.000000 | 2.43522e-16 | 1.000000 |
| rad14         | 2.41394e-16 | 1.000000 | 2.41394e-16 | 1.000000 |
| rad27         | 2.09173e-16 | 1.000000 | 2.09173e-16 | 1.000000 |
| rad42         | 1.75308e-16 | 1.000000 | 1.75308e-16 | 1.000000 |
| rad15         | 1.63805e-16 | 1.000000 | 1.63805e-16 | 1.000000 |
| rad25         | 9.87519e-17 | 1.000000 | 9.87519e-17 | 1.000000 |
| rad65         | 2.16409e-17 | 1.000000 | 2.16409e-17 | 1.000000 |
| rad53         | 2.36372e-18 | 1.000000 | 2.36372e-18 | 1.000000 |
| rad64         | 6.35544e-19 | 1.000000 | 6.35544e-19 | 1.000000 |
| rad61         | 1.33089e-19 | 1.000000 | 1.33089e-19 | 1.000000 |
| rad5          | 1.91792e-20 | 1.000000 | 1.91792e-20 | 1.000000 |
| rad31         | 1.11604e-20 | 1.000000 | 1.11604e-20 | 1.000000 |
| rad20         | 8.86648e-21 | 1.000000 | 8.86648e-21 | 1.000000 |
| rad56         | 8.26684e-21 | 1.000000 | 8.26684e-21 | 1.000000 |
| rad21         | 6.00074e-21 | 1.000000 | 6.00074e-21 | 1.000000 |
| rad18         | 5.19185e-21 | 1.000000 | 5.19185e-21 | 1.000000 |
| rad12         | 1.53204e-21 | 1.000000 | 1.53204e-21 | 1.000000 |
| rad68syn      | 9.92425e-22 | 1.000000 | 9.92425e-22 | 1.000000 |
| rad68anti     | 7.55796e-22 | 1.000000 | 7.55796e-22 | 1.000000 |
| rad19anti     | 2.02186e-22 | 1.000000 | 2.02186e-22 | 1.000000 |
| rad24         | 1.97391e-22 | 1.000000 | 1.97391e-22 | 1.000000 |
| rad40syn      | 7.67263e-24 | 1.000000 | 7.67263e-24 | 1.000000 |
| rad40anti     | 6.17194e-24 | 1.000000 | 6.17194e-24 | 1.000000 |
| PAH8+H        | 9.01733e-25 | 1.000000 | 9.01733e-25 | 1.000000 |
| rad73         | 2.96992e-25 | 1.000000 | 2.96992e-25 | 1.000000 |
| rad47         | 1.01195e-25 | 1.000000 | 1.01195e-25 | 1.000000 |
| rad71         | 1.50115e-27 | 1.000000 | 1.50115e-27 | 1.000000 |
| rad19syn      | 2.99699e-33 | 1.000000 | 2.99699e-33 | 1.000000 |
| rad8          | 4.70799e-55 | 1.000000 | 4.70799e-55 | 1.000000 |

1.00000000 Pa, 230.000000 K

| Rate constant             | True (fraction)        | Effective (fraction)   |
|---------------------------|------------------------|------------------------|
| Total                     | 2.20761e-14 (1.00)     | 2.20761e-14 (1.00)     |
| Formation of rad19        | 2.20710e-14 (1.000)    | 2.20710e-14 (1.000)    |
| H-abstraction to cyc2enyl | 5.13155e-18 (0.000232) | 5.13155e-18 (0.000232) |
| H-abstraction to cyclenyl | 3.75316e-21 (1.70e-07) | 3.75316e-21 (1.70e-07) |

| species                       | PYtrue      | Cumul    | PYeffective | Cumul    |
|-------------------------------|-------------|----------|-------------|----------|
| Indene+H                      | 0.999353    | 0.999353 | 0.999353    | 0.999353 |
| PhCHCCH2+H                    | 0.000391326 | 0.999745 | 0.000391326 | 0.999745 |
| Benzene+cycloprop-2-enylidene | 0.000232448 | 0.999977 | 0.000232448 | 0.999977 |
| PhCCH+CH3                     | 6.94771e-06 | 0.999984 | 6.94771e-06 | 0.999984 |
| C2H2+PhCH2                    | 5.56461e-06 | 0.999990 | 5.56461e-06 | 0.999990 |
| PhCCCH3+H                     | 4.23055e-06 | 0.999994 | 4.23055e-06 | 0.999994 |
| Ph+MeAc                       | 3.64354e-06 | 0.999998 | 3.64354e-06 | 0.999998 |
| rad67                         | 1.06623e-06 | 0.999999 | 1.06623e-06 | 0.999999 |
| rad35                         | 4.56568e-07 | 0.999999 | 4.56568e-07 | 0.999999 |
| Ph+Allene                     | 3.96783e-07 | 1.000000 | 3.96783e-07 | 1.000000 |
| rad6                          | 2.47236e-07 | 1.000000 | 2.47236e-07 | 1.000000 |
| Benzene+cycloprop-1-enylidene | 1.70010e-07 | 1.000000 | 1.70010e-07 | 1.000000 |
| PhCH2CCH+H                    | 5.83274e-08 | 1.000000 | 5.83274e-08 | 1.000000 |
| PAH7+H                        | 4.42489e-08 | 1.000000 | 4.42489e-08 | 1.000000 |
| rad37                         | 1.32948e-08 | 1.000000 | 1.32948e-08 | 1.000000 |
| rad39                         | 1.24615e-08 | 1.000000 | 1.24615e-08 | 1.000000 |
| rad30                         | 8.72500e-09 | 1.000000 | 8.72500e-09 | 1.000000 |
| PAH9+H                        | 6.93659e-10 | 1.000000 | 6.93659e-10 | 1.000000 |
| rad38                         | 3.31319e-10 | 1.000000 | 3.31319e-10 | 1.000000 |
| rad28                         | 2.84316e-10 | 1.000000 | 2.84316e-10 | 1.000000 |
| rad2                          | 2.65366e-10 | 1.000000 | 2.65366e-10 | 1.000000 |
| rad60syn                      | 5.29574e-11 | 1.000000 | 5.29574e-11 | 1.000000 |
| PAH10+CH3                     | 5.11627e-11 | 1.000000 | 5.11627e-11 | 1.000000 |
| PhcycC3H3_A+H                 | 4.09757e-11 | 1.000000 | 4.09757e-11 | 1.000000 |

|                |             |         |             |         |
|----------------|-------------|---------|-------------|---------|
| rad7           | 3.54264e-11 | 1.00000 | 3.54264e-11 | 1.00000 |
| rad26          | 3.42688e-11 | 1.00000 | 3.42688e-11 | 1.00000 |
| PAH3+H         | 3.23820e-11 | 1.00000 | 3.23820e-11 | 1.00000 |
| rad60anti      | 2.66470e-11 | 1.00000 | 2.66470e-11 | 1.00000 |
| rad46          | 2.12080e-11 | 1.00000 | 2.12080e-11 | 1.00000 |
| rad1           | 1.84738e-11 | 1.00000 | 1.84738e-11 | 1.00000 |
| rad10          | 1.80049e-11 | 1.00000 | 1.80049e-11 | 1.00000 |
| rad11          | 1.05498e-11 | 1.00000 | 1.05498e-11 | 1.00000 |
| rad59          | 6.27327e-12 | 1.00000 | 6.27327e-12 | 1.00000 |
| rad3           | 2.35679e-12 | 1.00000 | 2.35679e-12 | 1.00000 |
| rad43          | 1.78384e-12 | 1.00000 | 1.78384e-12 | 1.00000 |
| rad54          | 1.60339e-12 | 1.00000 | 1.60339e-12 | 1.00000 |
| rad4           | 1.22087e-12 | 1.00000 | 1.22087e-12 | 1.00000 |
| rad23          | 7.66964e-13 | 1.00000 | 7.66964e-13 | 1.00000 |
| Phenyl+cycC3H4 | 5.81829e-13 | 1.00000 | 0.00000     | 1.00000 |
| PhcycC3H3_B+H  | 4.18920e-13 | 1.00000 | 4.18920e-13 | 1.00000 |
| rad62          | 3.87272e-13 | 1.00000 | 3.87272e-13 | 1.00000 |
| rad50          | 2.55637e-13 | 1.00000 | 2.55637e-13 | 1.00000 |
| rad9           | 2.32517e-13 | 1.00000 | 2.32517e-13 | 1.00000 |
| rad13          | 1.17957e-13 | 1.00000 | 1.17957e-13 | 1.00000 |
| rad70          | 4.91265e-14 | 1.00000 | 4.91265e-14 | 1.00000 |
| PAH1+H         | 2.47410e-14 | 1.00000 | 2.47410e-14 | 1.00000 |
| rad55          | 2.11734e-14 | 1.00000 | 2.11734e-14 | 1.00000 |
| rad45          | 1.73588e-14 | 1.00000 | 1.73588e-14 | 1.00000 |
| rad52          | 2.58808e-15 | 1.00000 | 2.58808e-15 | 1.00000 |
| rad58          | 1.80760e-15 | 1.00000 | 1.80760e-15 | 1.00000 |
| rad34          | 1.32435e-15 | 1.00000 | 1.32435e-15 | 1.00000 |
| rad51          | 1.11167e-15 | 1.00000 | 1.11167e-15 | 1.00000 |
| rad36          | 1.08999e-15 | 1.00000 | 1.08999e-15 | 1.00000 |
| rad22          | 8.54702e-16 | 1.00000 | 8.54702e-16 | 1.00000 |
| rad41          | 3.89210e-16 | 1.00000 | 3.89210e-16 | 1.00000 |
| rad42          | 2.34239e-16 | 1.00000 | 2.34239e-16 | 1.00000 |
| rad33          | 2.03666e-16 | 1.00000 | 2.03666e-16 | 1.00000 |
| rad14          | 1.99895e-16 | 1.00000 | 1.99895e-16 | 1.00000 |
| rad27          | 1.73802e-16 | 1.00000 | 1.73802e-16 | 1.00000 |
| rad15          | 1.33982e-16 | 1.00000 | 1.33982e-16 | 1.00000 |
| rad25          | 8.21061e-17 | 1.00000 | 8.21061e-17 | 1.00000 |
| rad65          | 2.82326e-17 | 1.00000 | 2.82326e-17 | 1.00000 |
| rad53          | 4.01574e-18 | 1.00000 | 4.01574e-18 | 1.00000 |
| rad64          | 1.14561e-18 | 1.00000 | 1.14561e-18 | 1.00000 |
| rad61          | 2.83141e-19 | 1.00000 | 2.83141e-19 | 1.00000 |
| rad56          | 1.92068e-20 | 1.00000 | 1.92068e-20 | 1.00000 |
| rad5           | 1.48507e-20 | 1.00000 | 1.48507e-20 | 1.00000 |
| rad31          | 9.97077e-21 | 1.00000 | 9.97077e-21 | 1.00000 |
| rad20          | 7.60574e-21 | 1.00000 | 7.60574e-21 | 1.00000 |
| rad21          | 5.16491e-21 | 1.00000 | 5.16491e-21 | 1.00000 |
| rad18          | 4.18569e-21 | 1.00000 | 4.18569e-21 | 1.00000 |
| rad68syn       | 2.37000e-21 | 1.00000 | 2.37000e-21 | 1.00000 |
| rad68anti      | 1.79281e-21 | 1.00000 | 1.79281e-21 | 1.00000 |
| rad12          | 1.27342e-21 | 1.00000 | 1.27342e-21 | 1.00000 |
| rad19anti      | 1.74902e-22 | 1.00000 | 1.74902e-22 | 1.00000 |
| rad24          | 1.57731e-22 | 1.00000 | 1.57731e-22 | 1.00000 |
| rad40syn       | 2.36428e-23 | 1.00000 | 2.36428e-23 | 1.00000 |
| rad40anti      | 1.89889e-23 | 1.00000 | 1.89889e-23 | 1.00000 |
| PAH8+H         | 3.34557e-24 | 1.00000 | 3.34557e-24 | 1.00000 |
| rad73          | 9.12983e-25 | 1.00000 | 9.12983e-25 | 1.00000 |
| rad47          | 1.09378e-25 | 1.00000 | 1.09378e-25 | 1.00000 |
| rad71          | 6.01979e-27 | 1.00000 | 6.01979e-27 | 1.00000 |
| rad19syn       | 1.11382e-32 | 1.00000 | 1.11382e-32 | 1.00000 |
| rad8           | 6.73233e-55 | 1.00000 | 6.73233e-55 | 1.00000 |

1.00000000 Pa, 240.000000 K

=====

| Rate constant             | True (fraction)        | Effective (fraction)   |
|---------------------------|------------------------|------------------------|
| Total                     | 2.45462e-14 (1.00)     | 2.45462e-14 (1.00)     |
| Formation of rad19        | 2.45383e-14 (1.000)    | 2.45383e-14 (1.000)    |
| H-abstraction to cyc2enyl | 7.92234e-18 (0.000323) | 7.92234e-18 (0.000323) |
| H-abstraction to cyc1enyl | 7.97958e-21 (3.25e-07) | 7.97958e-21 (3.25e-07) |

| species                       | PYtrue      | Cumul    | PYeffective | Cumul    |
|-------------------------------|-------------|----------|-------------|----------|
| Indene+H                      | 0.999243    | 0.999243 | 0.999243    | 0.999243 |
| PhCHCCH2+H                    | 0.000410035 | 0.999653 | 0.000410035 | 0.999653 |
| Benzene+cycloprop-2-enylidene | 0.000322752 | 0.999976 | 0.000322752 | 0.999976 |
| PhCCH+CH3                     | 7.29880e-06 | 0.999983 | 7.29880e-06 | 0.999983 |
| C2H2+PhCH2                    | 5.93637e-06 | 0.999989 | 5.93637e-06 | 0.999989 |
| PhCCCH3+H                     | 4.46862e-06 | 0.999994 | 4.46862e-06 | 0.999994 |
| Ph+MeAc                       | 3.89864e-06 | 0.999997 | 3.89864e-06 | 0.999997 |
| rad67                         | 1.13738e-06 | 0.999999 | 1.13738e-06 | 0.999999 |

|                               |             |          |             |          |
|-------------------------------|-------------|----------|-------------|----------|
| rad35                         | 4.85754e-07 | 0.999999 | 4.85754e-07 | 0.999999 |
| Ph+Allene                     | 4.40953e-07 | 1.000000 | 4.40953e-07 | 1.000000 |
| Benzene+cycloprop-1-enylidene | 3.25084e-07 | 1.000000 | 3.25084e-07 | 1.000000 |
| rad6                          | 2.05071e-07 | 1.000000 | 2.05071e-07 | 1.000000 |
| PhCH2CCH+H                    | 6.59619e-08 | 1.000000 | 6.59619e-08 | 1.000000 |
| PAH7+H                        | 4.84192e-08 | 1.000000 | 4.84192e-08 | 1.000000 |
| rad37                         | 1.44767e-08 | 1.000000 | 1.44767e-08 | 1.000000 |
| rad39                         | 1.36304e-08 | 1.000000 | 1.36304e-08 | 1.000000 |
| rad30                         | 9.31642e-09 | 1.000000 | 9.31642e-09 | 1.000000 |
| PAH9+H                        | 7.61956e-10 | 1.000000 | 7.61956e-10 | 1.000000 |
| rad38                         | 3.67774e-10 | 1.000000 | 3.67774e-10 | 1.000000 |
| rad28                         | 2.35128e-10 | 1.000000 | 2.35128e-10 | 1.000000 |
| rad2                          | 2.19745e-10 | 1.000000 | 2.19745e-10 | 1.000000 |
| PAH10+CH3                     | 6.12251e-11 | 1.000000 | 6.12251e-11 | 1.000000 |
| rad60syn                      | 5.82033e-11 | 1.000000 | 5.82033e-11 | 1.000000 |
| PhcycC3H3_A+H                 | 5.46790e-11 | 1.000000 | 5.46790e-11 | 1.000000 |
| PAH3+H                        | 3.69272e-11 | 1.000000 | 3.69272e-11 | 1.000000 |
| rad60anti                     | 2.93620e-11 | 1.000000 | 2.93620e-11 | 1.000000 |
| rad7                          | 2.92409e-11 | 1.000000 | 2.92409e-11 | 1.000000 |
| rad26                         | 2.84562e-11 | 1.000000 | 2.84562e-11 | 1.000000 |
| rad46                         | 2.37431e-11 | 1.000000 | 2.37431e-11 | 1.000000 |
| rad1                          | 1.54601e-11 | 1.000000 | 1.54601e-11 | 1.000000 |
| rad10                         | 1.48892e-11 | 1.000000 | 1.48892e-11 | 1.000000 |
| rad11                         | 8.69449e-12 | 1.000000 | 8.69449e-12 | 1.000000 |
| rad59                         | 7.10937e-12 | 1.000000 | 7.10937e-12 | 1.000000 |
| rad43                         | 2.08053e-12 | 1.000000 | 2.08053e-12 | 1.000000 |
| rad54                         | 1.95261e-12 | 1.000000 | 1.95261e-12 | 1.000000 |
| rad3                          | 1.94763e-12 | 1.000000 | 1.94763e-12 | 1.000000 |
| rad4                          | 1.01188e-12 | 1.000000 | 1.01188e-12 | 1.000000 |
| Phenyl+cycC3H4                | 8.50545e-13 | 1.000000 | 0.000000    | 1.000000 |
| PhcycC3H3_B+H                 | 6.80425e-13 | 1.000000 | 6.80425e-13 | 1.000000 |
| rad23                         | 6.09014e-13 | 1.000000 | 6.09014e-13 | 1.000000 |
| rad62                         | 4.53143e-13 | 1.000000 | 4.53143e-13 | 1.000000 |
| rad50                         | 3.03042e-13 | 1.000000 | 3.03042e-13 | 1.000000 |
| rad9                          | 1.95160e-13 | 1.000000 | 1.95160e-13 | 1.000000 |
| rad13                         | 9.78543e-14 | 1.000000 | 9.78543e-14 | 1.000000 |
| rad70                         | 6.26990e-14 | 1.000000 | 6.26990e-14 | 1.000000 |
| PAH1+H                        | 3.33017e-14 | 1.000000 | 3.33017e-14 | 1.000000 |
| rad55                         | 2.70931e-14 | 1.000000 | 2.70931e-14 | 1.000000 |
| rad45                         | 1.37258e-14 | 1.000000 | 1.37258e-14 | 1.000000 |
| rad52                         | 3.19573e-15 | 1.000000 | 3.19573e-15 | 1.000000 |
| rad58                         | 2.32151e-15 | 1.000000 | 2.32151e-15 | 1.000000 |
| rad34                         | 1.80156e-15 | 1.000000 | 1.80156e-15 | 1.000000 |
| rad51                         | 1.43675e-15 | 1.000000 | 1.43675e-15 | 1.000000 |
| rad36                         | 8.65928e-16 | 1.000000 | 8.65928e-16 | 1.000000 |
| rad22                         | 6.70302e-16 | 1.000000 | 6.70302e-16 | 1.000000 |
| rad41                         | 5.33150e-16 | 1.000000 | 5.33150e-16 | 1.000000 |
| rad42                         | 3.13564e-16 | 1.000000 | 3.13564e-16 | 1.000000 |
| rad33                         | 1.69961e-16 | 1.000000 | 1.69961e-16 | 1.000000 |
| rad14                         | 1.65197e-16 | 1.000000 | 1.65197e-16 | 1.000000 |
| rad27                         | 1.44106e-16 | 1.000000 | 1.44106e-16 | 1.000000 |
| rad15                         | 1.12124e-16 | 1.000000 | 1.12124e-16 | 1.000000 |
| rad25                         | 6.81264e-17 | 1.000000 | 6.81264e-17 | 1.000000 |
| rad65                         | 3.70731e-17 | 1.000000 | 3.70731e-17 | 1.000000 |
| rad53                         | 6.72945e-18 | 1.000000 | 6.72945e-18 | 1.000000 |
| rad64                         | 2.02284e-18 | 1.000000 | 2.02284e-18 | 1.000000 |
| rad61                         | 5.80326e-19 | 1.000000 | 5.80326e-19 | 1.000000 |
| rad56                         | 4.26328e-20 | 1.000000 | 4.26328e-20 | 1.000000 |
| rad5                          | 1.15231e-20 | 1.000000 | 1.15231e-20 | 1.000000 |
| rad31                         | 8.94870e-21 | 1.000000 | 8.94870e-21 | 1.000000 |
| rad20                         | 6.54215e-21 | 1.000000 | 6.54215e-21 | 1.000000 |
| rad68syn                      | 5.38533e-21 | 1.000000 | 5.38533e-21 | 1.000000 |
| rad21                         | 4.45832e-21 | 1.000000 | 4.45832e-21 | 1.000000 |
| rad68anti                     | 4.04766e-21 | 1.000000 | 4.04766e-21 | 1.000000 |
| rad18                         | 3.38649e-21 | 1.000000 | 3.38649e-21 | 1.000000 |
| rad12                         | 1.08359e-21 | 1.000000 | 1.08359e-21 | 1.000000 |
| rad19anti                     | 1.69775e-22 | 1.000000 | 1.69775e-22 | 1.000000 |
| rad24                         | 1.26186e-22 | 1.000000 | 1.26186e-22 | 1.000000 |
| rad40syn                      | 6.73312e-23 | 1.000000 | 6.73312e-23 | 1.000000 |
| rad40anti                     | 5.39726e-23 | 1.000000 | 5.39726e-23 | 1.000000 |
| PAH8+H                        | 1.12143e-23 | 1.000000 | 1.12143e-23 | 1.000000 |
| rad73                         | 2.61016e-24 | 1.000000 | 2.61016e-24 | 1.000000 |
| rad47                         | 1.20101e-25 | 1.000000 | 1.20101e-25 | 1.000000 |
| rad71                         | 2.16079e-26 | 1.000000 | 2.16079e-26 | 1.000000 |
| rad19syn                      | 4.33471e-32 | 1.000000 | 4.33471e-32 | 1.000000 |
| rad8                          | 9.77135e-55 | 1.000000 | 9.77135e-55 | 1.000000 |

1.00000000 Pa, 250.000000 K

=====

Rate constant | True (fraction) | Effective (fraction)



```

-----
Total | 2.71048e-14 (1.00 ) 2.71048e-14 (1.00 )
Formation of rad19 | 2.70930e-14 (1.000 ) 2.70930e-14 (1.000 )
H-abstraction to cyc2enyl | 1.17991e-17 (0.000435) 1.17991e-17 (0.000435)
H-abstraction to cyclenyl | 1.59554e-20 (5.89e-07) 1.59554e-20 (5.89e-07)

```

| species                       | PYtrue      | Cumul    | PYeffective | Cumul    |
|-------------------------------|-------------|----------|-------------|----------|
| Indene+H                      | 0.999108    | 0.999108 | 0.999108    | 0.999108 |
| Benzene+cycloprop-2-enylidene | 0.000435312 | 0.999544 | 0.000435312 | 0.999544 |
| PhCHCCH2+H                    | 0.000430462 | 0.999974 | 0.000430462 | 0.999974 |
| PhCCH+CH3                     | 7.67970e-06 | 0.999982 | 7.67970e-06 | 0.999982 |
| C2H2+PhCH2                    | 6.34524e-06 | 0.999988 | 6.34524e-06 | 0.999988 |
| PhCCCH3+H                     | 4.72980e-06 | 0.999993 | 4.72980e-06 | 0.999993 |
| Ph+MeAc                       | 4.18199e-06 | 0.999997 | 4.18199e-06 | 0.999997 |
| rad67                         | 1.21639e-06 | 0.999998 | 1.21639e-06 | 0.999998 |
| Benzene+cycloprop-1-enylidene | 5.88656e-07 | 0.999999 | 5.88656e-07 | 0.999999 |
| rad35                         | 5.18086e-07 | 0.999999 | 5.18086e-07 | 0.999999 |
| Ph+Allene                     | 4.91386e-07 | 1.000000 | 4.91386e-07 | 1.000000 |
| rad6                          | 1.69670e-07 | 1.000000 | 1.69670e-07 | 1.000000 |
| PhCH2CCH+H                    | 7.48362e-08 | 1.000000 | 7.48362e-08 | 1.000000 |
| PAH7+H                        | 5.30941e-08 | 1.000000 | 5.30941e-08 | 1.000000 |
| rad37                         | 1.58162e-08 | 1.000000 | 1.58162e-08 | 1.000000 |
| rad39                         | 1.49388e-08 | 1.000000 | 1.49388e-08 | 1.000000 |
| rad30                         | 9.97455e-09 | 1.000000 | 9.97455e-09 | 1.000000 |
| PAH9+H                        | 8.39588e-10 | 1.000000 | 8.39588e-10 | 1.000000 |
| rad38                         | 4.09781e-10 | 1.000000 | 4.09781e-10 | 1.000000 |
| rad28                         | 1.93992e-10 | 1.000000 | 1.93992e-10 | 1.000000 |
| rad2                          | 1.81512e-10 | 1.000000 | 1.81512e-10 | 1.000000 |
| PAH10+CH3                     | 7.36816e-11 | 1.000000 | 7.36816e-11 | 1.000000 |
| PhcycC3H3_A+H                 | 7.30538e-11 | 1.000000 | 7.30538e-11 | 1.000000 |
| rad60syn                      | 6.42153e-11 | 1.000000 | 6.42153e-11 | 1.000000 |
| PAH3+H                        | 4.23286e-11 | 1.000000 | 4.23286e-11 | 1.000000 |
| rad60anti                     | 3.24814e-11 | 1.000000 | 3.24814e-11 | 1.000000 |
| rad46                         | 2.66811e-11 | 1.000000 | 2.66811e-11 | 1.000000 |
| rad7                          | 2.40819e-11 | 1.000000 | 2.40819e-11 | 1.000000 |
| rad26                         | 2.35682e-11 | 1.000000 | 2.35682e-11 | 1.000000 |
| rad1                          | 1.29165e-11 | 1.000000 | 1.29165e-11 | 1.000000 |
| rad10                         | 1.22837e-11 | 1.000000 | 1.22837e-11 | 1.000000 |
| rad59                         | 8.09647e-12 | 1.000000 | 8.09647e-12 | 1.000000 |
| rad11                         | 7.15025e-12 | 1.000000 | 7.15025e-12 | 1.000000 |
| rad43                         | 2.43798e-12 | 1.000000 | 2.43798e-12 | 1.000000 |
| rad54                         | 2.38704e-12 | 1.000000 | 2.38704e-12 | 1.000000 |
| rad3                          | 1.60601e-12 | 1.000000 | 1.60601e-12 | 1.000000 |
| Phenyl+cycC3H4                | 1.23952e-12 | 1.000000 | 0.000000    | 1.000000 |
| PhcycC3H3_B+H                 | 1.08997e-12 | 1.000000 | 1.08997e-12 | 1.000000 |
| rad4                          | 8.37059e-13 | 1.000000 | 8.37059e-13 | 1.000000 |
| rad62                         | 5.32363e-13 | 1.000000 | 5.32363e-13 | 1.000000 |
| rad23                         | 4.83603e-13 | 1.000000 | 4.83603e-13 | 1.000000 |
| rad50                         | 3.61200e-13 | 1.000000 | 3.61200e-13 | 1.000000 |
| rad9                          | 1.67515e-13 | 1.000000 | 1.67515e-13 | 1.000000 |
| rad13                         | 8.10050e-14 | 1.000000 | 8.10050e-14 | 1.000000 |
| rad70                         | 8.03279e-14 | 1.000000 | 8.03279e-14 | 1.000000 |
| PAH1+H                        | 4.49546e-14 | 1.000000 | 4.49546e-14 | 1.000000 |
| rad55                         | 3.47807e-14 | 1.000000 | 3.47807e-14 | 1.000000 |
| rad45                         | 1.08603e-14 | 1.000000 | 1.08603e-14 | 1.000000 |
| rad52                         | 3.97017e-15 | 1.000000 | 3.97017e-15 | 1.000000 |
| rad58                         | 2.99927e-15 | 1.000000 | 2.99927e-15 | 1.000000 |
| rad34                         | 2.45589e-15 | 1.000000 | 2.45589e-15 | 1.000000 |
| rad51                         | 1.86851e-15 | 1.000000 | 1.86851e-15 | 1.000000 |
| rad41                         | 7.31181e-16 | 1.000000 | 7.31181e-16 | 1.000000 |
| rad36                         | 6.88766e-16 | 1.000000 | 6.88766e-16 | 1.000000 |
| rad22                         | 5.26082e-16 | 1.000000 | 5.26082e-16 | 1.000000 |
| rad42                         | 4.20191e-16 | 1.000000 | 4.20191e-16 | 1.000000 |
| rad33                         | 1.41528e-16 | 1.000000 | 1.41528e-16 | 1.000000 |
| rad14                         | 1.36244e-16 | 1.000000 | 1.36244e-16 | 1.000000 |
| rad27                         | 1.19234e-16 | 1.000000 | 1.19234e-16 | 1.000000 |
| rad15                         | 9.59749e-17 | 1.000000 | 9.59749e-17 | 1.000000 |
| rad25                         | 5.64112e-17 | 1.000000 | 5.64112e-17 | 1.000000 |
| rad65                         | 4.89611e-17 | 1.000000 | 4.89611e-17 | 1.000000 |
| rad53                         | 1.11322e-17 | 1.000000 | 1.11322e-17 | 1.000000 |
| rad64                         | 3.50446e-18 | 1.000000 | 3.50446e-18 | 1.000000 |
| rad61                         | 1.15033e-18 | 1.000000 | 1.15033e-18 | 1.000000 |
| rad56                         | 9.08258e-20 | 1.000000 | 9.08258e-20 | 1.000000 |
| rad68syn                      | 1.17051e-20 | 1.000000 | 1.17051e-20 | 1.000000 |
| rad5                          | 8.95685e-21 | 1.000000 | 8.95685e-21 | 1.000000 |
| rad68anti                     | 8.74460e-21 | 1.000000 | 8.74460e-21 | 1.000000 |
| rad31                         | 8.07376e-21 | 1.000000 | 8.07376e-21 | 1.000000 |
| rad20                         | 5.64183e-21 | 1.000000 | 5.64183e-21 | 1.000000 |
| rad21                         | 3.85894e-21 | 1.000000 | 3.85894e-21 | 1.000000 |

|           |             |         |             |         |
|-----------|-------------|---------|-------------|---------|
| rad18     | 2.74864e-21 | 1.00000 | 2.74864e-21 | 1.00000 |
| rad12     | 9.43747e-22 | 1.00000 | 9.43747e-22 | 1.00000 |
| rad19anti | 2.18081e-22 | 1.00000 | 2.18081e-22 | 1.00000 |
| rad40syn  | 1.78598e-22 | 1.00000 | 1.78598e-22 | 1.00000 |
| rad40anti | 1.42856e-22 | 1.00000 | 1.42856e-22 | 1.00000 |
| rad24     | 1.01060e-22 | 1.00000 | 1.01060e-22 | 1.00000 |
| PAH8+H    | 3.42855e-23 | 1.00000 | 3.42855e-23 | 1.00000 |
| rad73     | 6.98141e-24 | 1.00000 | 6.98141e-24 | 1.00000 |
| rad47     | 1.34117e-25 | 1.00000 | 1.34117e-25 | 1.00000 |
| rad71     | 7.01340e-26 | 1.00000 | 7.01340e-26 | 1.00000 |
| rad19syn  | 1.76220e-31 | 1.00000 | 1.76220e-31 | 1.00000 |
| rad8      | 1.44041e-54 | 1.00000 | 1.44041e-54 | 1.00000 |

1.00000000 Pa, 260.000000 K

| Rate constant             | True (fraction)        | Effective (fraction)   |
|---------------------------|------------------------|------------------------|
| Total                     | 2.97464e-14 (1.00 )    | 2.97464e-14 (1.00 )    |
| Formation of rad19        | 2.97293e-14 (0.999 )   | 2.97293e-14 (0.999 )   |
| H-abstraction to cyc2enyl | 1.70236e-17 (0.000572) | 1.70236e-17 (0.000572) |
| H-abstraction to cyclenyl | 3.02186e-20 (1.02e-06) | 3.02186e-20 (1.02e-06) |

| species                       | PYtrue      | Cumul    | PYeffective | Cumul    |
|-------------------------------|-------------|----------|-------------|----------|
| Indene+H                      | 0.998947    | 0.998947 | 0.998947    | 0.998947 |
| Benzene+cycloprop-2-enylidene | 0.000572291 | 0.999519 | 0.000572291 | 0.999519 |
| PhCHCCH2+H                    | 0.000452759 | 0.999972 | 0.000452759 | 0.999972 |
| PhCCH+CH3                     | 8.09291e-06 | 0.999980 | 8.09291e-06 | 0.999980 |
| C2H2+PhCH2                    | 6.79535e-06 | 0.999987 | 6.79535e-06 | 0.999987 |
| PhCCCH3+H                     | 5.01632e-06 | 0.999992 | 5.01632e-06 | 0.999992 |
| Ph+MeAc                       | 4.49678e-06 | 0.999996 | 4.49678e-06 | 0.999996 |
| rad67                         | 1.30414e-06 | 0.999998 | 1.30414e-06 | 0.999998 |
| Benzene+cycloprop-1-enylidene | 1.01588e-06 | 0.999999 | 1.01588e-06 | 0.999999 |
| rad35                         | 5.53906e-07 | 0.999999 | 5.53906e-07 | 0.999999 |
| Ph+Allene                     | 5.49057e-07 | 1.000000 | 5.49057e-07 | 1.000000 |
| rad6                          | 1.40036e-07 | 1.000000 | 1.40036e-07 | 1.000000 |
| PhCH2CCH+H                    | 8.51681e-08 | 1.000000 | 8.51681e-08 | 1.000000 |
| PAH7+H                        | 5.83434e-08 | 1.000000 | 5.83434e-08 | 1.000000 |
| rad37                         | 1.73351e-08 | 1.000000 | 1.73351e-08 | 1.000000 |
| rad39                         | 1.64056e-08 | 1.000000 | 1.64056e-08 | 1.000000 |
| rad30                         | 1.07073e-08 | 1.000000 | 1.07073e-08 | 1.000000 |
| PAH9+H                        | 9.27985e-10 | 1.000000 | 9.27985e-10 | 1.000000 |
| rad38                         | 4.58285e-10 | 1.000000 | 4.58285e-10 | 1.000000 |
| rad28                         | 1.59682e-10 | 1.000000 | 1.59682e-10 | 1.000000 |
| rad2                          | 1.49561e-10 | 1.000000 | 1.49561e-10 | 1.000000 |
| PhcycC3H3_A+H                 | 9.76488e-11 | 1.000000 | 9.76488e-11 | 1.000000 |
| PAH10+CH3                     | 8.91293e-11 | 1.000000 | 8.91293e-11 | 1.000000 |
| rad60syn                      | 7.11132e-11 | 1.000000 | 7.11132e-11 | 1.000000 |
| PAH3+H                        | 4.87599e-11 | 1.000000 | 4.87599e-11 | 1.000000 |
| rad60anti                     | 3.60697e-11 | 1.000000 | 3.60697e-11 | 1.000000 |
| rad46                         | 3.00929e-11 | 1.000000 | 3.00929e-11 | 1.000000 |
| rad7                          | 1.97892e-11 | 1.000000 | 1.97892e-11 | 1.000000 |
| rad26                         | 1.94703e-11 | 1.000000 | 1.94703e-11 | 1.000000 |
| rad1                          | 1.07743e-11 | 1.000000 | 1.07743e-11 | 1.000000 |
| rad10                         | 1.01109e-11 | 1.000000 | 1.01109e-11 | 1.000000 |
| rad59                         | 9.26385e-12 | 1.000000 | 9.26385e-12 | 1.000000 |
| rad11                         | 5.86788e-12 | 1.000000 | 5.86788e-12 | 1.000000 |
| rad54                         | 2.92818e-12 | 1.000000 | 2.92818e-12 | 1.000000 |
| rad43                         | 2.86915e-12 | 1.000000 | 2.86915e-12 | 1.000000 |
| Phenyl+cycC3H4                | 1.79997e-12 | 1.000000 | 0.000000    | 1.000000 |
| PhcycC3H3_B+H                 | 1.72346e-12 | 1.000000 | 1.72346e-12 | 1.000000 |
| rad3                          | 1.32148e-12 | 1.000000 | 1.32148e-12 | 1.000000 |
| rad4                          | 6.91148e-13 | 1.000000 | 6.91148e-13 | 1.000000 |
| rad62                         | 6.27703e-13 | 1.000000 | 6.27703e-13 | 1.000000 |
| rad50                         | 4.32743e-13 | 1.000000 | 4.32743e-13 | 1.000000 |
| rad23                         | 3.84009e-13 | 1.000000 | 3.84009e-13 | 1.000000 |
| rad9                          | 1.47104e-13 | 1.000000 | 1.47104e-13 | 1.000000 |
| rad70                         | 1.03242e-13 | 1.000000 | 1.03242e-13 | 1.000000 |
| rad13                         | 6.69160e-14 | 1.000000 | 6.69160e-14 | 1.000000 |
| PAH1+H                        | 6.08076e-14 | 1.000000 | 6.08076e-14 | 1.000000 |
| rad55                         | 4.47685e-14 | 1.000000 | 4.47685e-14 | 1.000000 |
| rad45                         | 8.59851e-15 | 1.000000 | 8.59851e-15 | 1.000000 |
| rad52                         | 4.95990e-15 | 1.000000 | 4.95990e-15 | 1.000000 |
| rad58                         | 3.89459e-15 | 1.000000 | 3.89459e-15 | 1.000000 |
| rad34                         | 3.35226e-15 | 1.000000 | 3.35226e-15 | 1.000000 |
| rad51                         | 2.44339e-15 | 1.000000 | 2.44339e-15 | 1.000000 |
| rad41                         | 1.00312e-15 | 1.000000 | 1.00312e-15 | 1.000000 |
| rad42                         | 5.63236e-16 | 1.000000 | 5.63236e-16 | 1.000000 |
| rad36                         | 5.48515e-16 | 1.000000 | 5.48515e-16 | 1.000000 |
| rad22                         | 4.13144e-16 | 1.000000 | 4.13144e-16 | 1.000000 |

|           |             |         |             |         |
|-----------|-------------|---------|-------------|---------|
| rad33     | 1.17604e-16 | 1.00000 | 1.17604e-16 | 1.00000 |
| rad14     | 1.12140e-16 | 1.00000 | 1.12140e-16 | 1.00000 |
| rad27     | 9.84513e-17 | 1.00000 | 9.84513e-17 | 1.00000 |
| rad15     | 8.40622e-17 | 1.00000 | 8.40622e-17 | 1.00000 |
| rad65     | 6.49767e-17 | 1.00000 | 6.49767e-17 | 1.00000 |
| rad25     | 4.66161e-17 | 1.00000 | 4.66161e-17 | 1.00000 |
| rad53     | 1.81880e-17 | 1.00000 | 1.81880e-17 | 1.00000 |
| rad64     | 5.96393e-18 | 1.00000 | 5.96393e-18 | 1.00000 |
| rad61     | 2.21146e-18 | 1.00000 | 2.21146e-18 | 1.00000 |
| rad56     | 1.86346e-19 | 1.00000 | 1.86346e-19 | 1.00000 |
| rad68syn  | 2.44306e-20 | 1.00000 | 2.44306e-20 | 1.00000 |
| rad68anti | 1.81495e-20 | 1.00000 | 1.81495e-20 | 1.00000 |
| rad31     | 7.32850e-21 | 1.00000 | 7.32850e-21 | 1.00000 |
| rad5      | 6.97266e-21 | 1.00000 | 6.97266e-21 | 1.00000 |
| rad20     | 4.87752e-21 | 1.00000 | 4.87752e-21 | 1.00000 |
| rad21     | 3.34902e-21 | 1.00000 | 3.34902e-21 | 1.00000 |
| rad18     | 2.23746e-21 | 1.00000 | 2.23746e-21 | 1.00000 |
| rad12     | 8.41690e-22 | 1.00000 | 8.41690e-22 | 1.00000 |
| rad40syn  | 4.43949e-22 | 1.00000 | 4.43949e-22 | 1.00000 |
| rad19anti | 4.40976e-22 | 1.00000 | 4.40976e-22 | 1.00000 |
| rad40anti | 3.54315e-22 | 1.00000 | 3.54315e-22 | 1.00000 |
| PAH8+H    | 9.63768e-23 | 1.00000 | 9.63768e-23 | 1.00000 |
| rad24     | 8.10237e-23 | 1.00000 | 8.10237e-23 | 1.00000 |
| rad73     | 1.75494e-23 | 1.00000 | 1.75494e-23 | 1.00000 |
| rad71     | 2.07661e-25 | 1.00000 | 2.07661e-25 | 1.00000 |
| rad47     | 1.52473e-25 | 1.00000 | 1.52473e-25 | 1.00000 |
| rad19syn  | 7.46105e-31 | 1.00000 | 7.46105e-31 | 1.00000 |
| rad8      | 2.15827e-54 | 1.00000 | 2.15827e-54 | 1.00000 |

1.0000000 Pa, 270.00000 K

| Rate constant             | True (fraction)        | Effective (fraction)   |
|---------------------------|------------------------|------------------------|
| Total                     | 3.24655e-14 (1.00 )    | 3.24655e-14 (1.00 )    |
| Formation of rad19        | 3.24415e-14 (0.999 )   | 3.24415e-14 (0.999 )   |
| H-abstraction to cyc2enyl | 2.38790e-17 (0.000736) | 2.38790e-17 (0.000736) |
| H-abstraction to cyclenyl | 5.45397e-20 (1.68e-06) | 5.45397e-20 (1.68e-06) |

| species                       | PYtrue      | Cumul    | PYeffective | Cumul    |
|-------------------------------|-------------|----------|-------------|----------|
| Indene+H                      | 0.998757    | 0.998757 | 0.998757    | 0.998757 |
| Benzene+cycloprop-2-enylidene | 0.000735519 | 0.999493 | 0.000735519 | 0.999493 |
| PhCHCCH2+H                    | 0.000477088 | 0.999970 | 0.000477088 | 0.999970 |
| PhCCH+CH3                     | 8.54104e-06 | 0.999978 | 8.54104e-06 | 0.999978 |
| C2H2+PhCH2                    | 7.29118e-06 | 0.999986 | 7.29118e-06 | 0.999986 |
| PhCCCH3+H                     | 5.33057e-06 | 0.999991 | 5.33057e-06 | 0.999991 |
| Ph+MeAc                       | 4.84650e-06 | 0.999996 | 4.84650e-06 | 0.999996 |
| Benzene+cycloprop-1-enylidene | 1.67993e-06 | 0.999997 | 1.67993e-06 | 0.999997 |
| rad67                         | 1.40159e-06 | 0.999999 | 1.40159e-06 | 0.999999 |
| Ph+Allene                     | 6.15087e-07 | 0.999999 | 6.15087e-07 | 0.999999 |
| rad35                         | 5.93588e-07 | 1.00000  | 5.93588e-07 | 1.00000  |
| rad6                          | 1.15298e-07 | 1.00000  | 1.15298e-07 | 1.00000  |
| PhCH2CCH+H                    | 9.72124e-08 | 1.00000  | 9.72124e-08 | 1.00000  |
| PAH7+H                        | 6.42442e-08 | 1.00000  | 6.42442e-08 | 1.00000  |
| rad37                         | 1.90584e-08 | 1.00000  | 1.90584e-08 | 1.00000  |
| rad39                         | 1.80517e-08 | 1.00000  | 1.80517e-08 | 1.00000  |
| rad30                         | 1.15232e-08 | 1.00000  | 1.15232e-08 | 1.00000  |
| PAH9+H                        | 1.02878e-09 | 1.00000  | 1.02878e-09 | 1.00000  |
| rad38                         | 5.14384e-10 | 1.00000  | 5.14384e-10 | 1.00000  |
| rad28                         | 1.31140e-10 | 1.00000  | 1.31140e-10 | 1.00000  |
| PhcycC3H3_A+H                 | 1.30491e-10 | 1.00000  | 1.30491e-10 | 1.00000  |
| rad2                          | 1.22939e-10 | 1.00000  | 1.22939e-10 | 1.00000  |
| PAH10+CH3                     | 1.08311e-10 | 1.00000  | 1.08311e-10 | 1.00000  |
| rad60syn                      | 7.90350e-11 | 1.00000  | 7.90350e-11 | 1.00000  |
| PAH3+H                        | 5.64295e-11 | 1.00000  | 5.64295e-11 | 1.00000  |
| rad60anti                     | 4.02015e-11 | 1.00000  | 4.02015e-11 | 1.00000  |
| rad46                         | 3.40617e-11 | 1.00000  | 3.40617e-11 | 1.00000  |
| rad7                          | 1.62265e-11 | 1.00000  | 1.62265e-11 | 1.00000  |
| rad26                         | 1.60453e-11 | 1.00000  | 1.60453e-11 | 1.00000  |
| rad59                         | 1.06463e-11 | 1.00000  | 1.06463e-11 | 1.00000  |
| rad1                          | 8.97427e-12 | 1.00000  | 8.97427e-12 | 1.00000  |
| rad10                         | 8.30362e-12 | 1.00000  | 8.30362e-12 | 1.00000  |
| rad11                         | 4.80549e-12 | 1.00000  | 4.80549e-12 | 1.00000  |
| rad54                         | 3.60280e-12 | 1.00000  | 3.60280e-12 | 1.00000  |
| rad43                         | 3.38968e-12 | 1.00000  | 3.38968e-12 | 1.00000  |
| PhcycC3H3_B+H                 | 2.69134e-12 | 1.00000  | 2.69134e-12 | 1.00000  |
| Phenyl+cycC3H4                | 2.60320e-12 | 1.00000  | 0.00000     | 1.00000  |
| rad3                          | 1.08512e-12 | 1.00000  | 1.08512e-12 | 1.00000  |
| rad62                         | 7.42472e-13 | 1.00000  | 7.42472e-13 | 1.00000  |
| rad4                          | 5.69651e-13 | 1.00000  | 5.69651e-13 | 1.00000  |

|           |             |         |             |         |
|-----------|-------------|---------|-------------|---------|
| rad50     | 5.20946e-13 | 1.00000 | 5.20946e-13 | 1.00000 |
| rad23     | 3.04920e-13 | 1.00000 | 3.04920e-13 | 1.00000 |
| rad70     | 1.33026e-13 | 1.00000 | 1.33026e-13 | 1.00000 |
| rad9      | 1.32346e-13 | 1.00000 | 1.32346e-13 | 1.00000 |
| PAH1+H    | 8.23458e-14 | 1.00000 | 8.23458e-14 | 1.00000 |
| rad55     | 5.77417e-14 | 1.00000 | 5.77417e-14 | 1.00000 |
| rad13     | 5.51641e-14 | 1.00000 | 5.51641e-14 | 1.00000 |
| rad45     | 6.81228e-15 | 1.00000 | 6.81228e-15 | 1.00000 |
| rad52     | 6.22745e-15 | 1.00000 | 6.22745e-15 | 1.00000 |
| rad58     | 5.07823e-15 | 1.00000 | 5.07823e-15 | 1.00000 |
| rad34     | 4.57809e-15 | 1.00000 | 4.57809e-15 | 1.00000 |
| rad51     | 3.21003e-15 | 1.00000 | 3.21003e-15 | 1.00000 |
| rad41     | 1.37562e-15 | 1.00000 | 1.37562e-15 | 1.00000 |
| rad42     | 7.54642e-16 | 1.00000 | 7.54642e-16 | 1.00000 |
| rad36     | 4.37377e-16 | 1.00000 | 4.37377e-16 | 1.00000 |
| rad22     | 3.24625e-16 | 1.00000 | 3.24625e-16 | 1.00000 |
| rad33     | 9.75256e-17 | 1.00000 | 9.75256e-17 | 1.00000 |
| rad14     | 9.21205e-17 | 1.00000 | 9.21205e-17 | 1.00000 |
| rad65     | 8.65742e-17 | 1.00000 | 8.65742e-17 | 1.00000 |
| rad27     | 8.11282e-17 | 1.00000 | 8.11282e-17 | 1.00000 |
| rad15     | 7.54451e-17 | 1.00000 | 7.54451e-17 | 1.00000 |
| rad25     | 3.84456e-17 | 1.00000 | 3.84456e-17 | 1.00000 |
| rad53     | 2.93537e-17 | 1.00000 | 2.93537e-17 | 1.00000 |
| rad64     | 9.97742e-18 | 1.00000 | 9.97742e-18 | 1.00000 |
| rad61     | 4.13125e-18 | 1.00000 | 4.13125e-18 | 1.00000 |
| rad56     | 3.69065e-19 | 1.00000 | 3.69065e-19 | 1.00000 |
| rad68syn  | 4.91012e-20 | 1.00000 | 4.91012e-20 | 1.00000 |
| rad68anti | 3.62913e-20 | 1.00000 | 3.62913e-20 | 1.00000 |
| rad31     | 6.69802e-21 | 1.00000 | 6.69802e-21 | 1.00000 |
| rad5      | 5.43515e-21 | 1.00000 | 5.43515e-21 | 1.00000 |
| rad20     | 4.22709e-21 | 1.00000 | 4.22709e-21 | 1.00000 |
| rad21     | 2.91414e-21 | 1.00000 | 2.91414e-21 | 1.00000 |
| rad18     | 1.82628e-21 | 1.00000 | 1.82628e-21 | 1.00000 |
| rad19anti | 1.29009e-21 | 1.00000 | 1.29009e-21 | 1.00000 |
| rad40syn  | 1.03921e-21 | 1.00000 | 1.03921e-21 | 1.00000 |
| rad40anti | 8.27583e-22 | 1.00000 | 8.27583e-22 | 1.00000 |
| rad12     | 7.69834e-22 | 1.00000 | 7.69834e-22 | 1.00000 |
| PAH8+H    | 2.50812e-22 | 1.00000 | 2.50812e-22 | 1.00000 |
| rad24     | 6.50341e-23 | 1.00000 | 6.50341e-23 | 1.00000 |
| rad73     | 4.16103e-23 | 1.00000 | 4.16103e-23 | 1.00000 |
| rad71     | 5.65284e-25 | 1.00000 | 5.65284e-25 | 1.00000 |
| rad47     | 1.76648e-25 | 1.00000 | 1.76648e-25 | 1.00000 |
| rad19syn  | 3.27848e-30 | 1.00000 | 3.27848e-30 | 1.00000 |
| rad8      | 3.29025e-54 | 1.00000 | 3.29025e-54 | 1.00000 |

1.00000000 Pa, 280.000000 K

| Rate constant             | True (fraction)        | Effective (fraction)   |
|---------------------------|------------------------|------------------------|
| Total                     | 3.52572e-14 (1.00)     | 3.52572e-14 (1.00)     |
| Formation of rad19        | 3.52244e-14 (0.999)    | 3.52244e-14 (0.999)    |
| H-abstraction to cyc2enyl | 3.26639e-17 (0.000926) | 3.26639e-17 (0.000926) |
| H-abstraction to cyclenyl | 9.42926e-20 (2.67e-06) | 9.42926e-20 (2.67e-06) |

| species                       | PYtrue      | Cumul    | PYeffective | Cumul    |
|-------------------------------|-------------|----------|-------------|----------|
| Indene+H                      | 0.998536    | 0.998536 | 0.998536    | 0.998536 |
| Benzene+cycloprop-2-enylidene | 0.000926445 | 0.999463 | 0.000926445 | 0.999463 |
| PhCHCCH2+H                    | 0.000503623 | 0.999966 | 0.000503623 | 0.999966 |
| PhCCH+CH3                     | 9.02681e-06 | 0.999975 | 9.02681e-06 | 0.999975 |
| C2H2+PhCH2                    | 7.83753e-06 | 0.999983 | 7.83753e-06 | 0.999983 |
| PhCCCH3+H                     | 5.67508e-06 | 0.999989 | 5.67508e-06 | 0.999989 |
| Ph+MeAc                       | 5.23494e-06 | 0.999994 | 5.23494e-06 | 0.999994 |
| Benzene+cycloprop-1-enylidene | 2.67442e-06 | 0.999997 | 2.67442e-06 | 0.999997 |
| rad67                         | 1.50978e-06 | 0.999998 | 1.50978e-06 | 0.999998 |
| Ph+Allene                     | 6.90749e-07 | 0.999999 | 6.90749e-07 | 0.999999 |
| rad35                         | 6.37539e-07 | 1.000000 | 6.37539e-07 | 1.000000 |
| PhCH2CCH+H                    | 1.11265e-07 | 1.000000 | 1.11265e-07 | 1.000000 |
| rad6                          | 9.47096e-08 | 1.000000 | 9.47096e-08 | 1.000000 |
| PAH7+H                        | 7.08827e-08 | 1.000000 | 7.08827e-08 | 1.000000 |
| rad37                         | 2.10142e-08 | 1.000000 | 2.10142e-08 | 1.000000 |
| rad39                         | 1.99000e-08 | 1.000000 | 1.99000e-08 | 1.000000 |
| rad30                         | 1.24318e-08 | 1.000000 | 1.24318e-08 | 1.000000 |
| PAH9+H                        | 1.14386e-09 | 1.000000 | 1.14386e-09 | 1.000000 |
| rad38                         | 5.79355e-10 | 1.000000 | 5.79355e-10 | 1.000000 |
| PhcycC3H3_A+H                 | 1.74211e-10 | 1.000000 | 1.74211e-10 | 1.000000 |
| PAH10+CH3                     | 1.32147e-10 | 1.000000 | 1.32147e-10 | 1.000000 |
| rad28                         | 1.07461e-10 | 1.000000 | 1.07461e-10 | 1.000000 |
| rad2                          | 1.00821e-10 | 1.000000 | 1.00821e-10 | 1.000000 |
| rad60syn                      | 8.81389e-11 | 1.000000 | 8.81389e-11 | 1.000000 |

|                |             |         |             |         |
|----------------|-------------|---------|-------------|---------|
| PAH3+H         | 6.55869e-11 | 1.00000 | 6.55869e-11 | 1.00000 |
| rad60anti      | 4.49628e-11 | 1.00000 | 4.49628e-11 | 1.00000 |
| rad46          | 3.86846e-11 | 1.00000 | 3.86846e-11 | 1.00000 |
| rad7           | 1.32771e-11 | 1.00000 | 1.32771e-11 | 1.00000 |
| rad26          | 1.31911e-11 | 1.00000 | 1.31911e-11 | 1.00000 |
| rad59          | 1.22855e-11 | 1.00000 | 1.22855e-11 | 1.00000 |
| rad1           | 7.46482e-12 | 1.00000 | 7.46482e-12 | 1.00000 |
| rad10          | 6.80456e-12 | 1.00000 | 6.80456e-12 | 1.00000 |
| rad54          | 4.44404e-12 | 1.00000 | 4.44404e-12 | 1.00000 |
| PhcycC3H3_B+H  | 4.15176e-12 | 1.00000 | 4.15176e-12 | 1.00000 |
| rad43          | 4.01829e-12 | 1.00000 | 4.01829e-12 | 1.00000 |
| rad11          | 3.92748e-12 | 1.00000 | 3.92748e-12 | 1.00000 |
| Phenyl+cycC3H4 | 3.74742e-12 | 1.00000 | 0.00000     | 1.00000 |
| rad3           | 8.89278e-13 | 1.00000 | 8.89278e-13 | 1.00000 |
| rad62          | 8.80611e-13 | 1.00000 | 8.80611e-13 | 1.00000 |
| rad50          | 6.29871e-13 | 1.00000 | 6.29871e-13 | 1.00000 |
| rad4           | 4.68720e-13 | 1.00000 | 4.68720e-13 | 1.00000 |
| rad23          | 2.42131e-13 | 1.00000 | 2.42131e-13 | 1.00000 |
| rad70          | 1.71715e-13 | 1.00000 | 1.71715e-13 | 1.00000 |
| rad9           | 1.22356e-13 | 1.00000 | 1.22356e-13 | 1.00000 |
| PAH1+H         | 1.11542e-13 | 1.00000 | 1.11542e-13 | 1.00000 |
| rad55          | 7.45777e-14 | 1.00000 | 7.45777e-14 | 1.00000 |
| rad13          | 4.53858e-14 | 1.00000 | 4.53858e-14 | 1.00000 |
| rad52          | 7.85298e-15 | 1.00000 | 7.85298e-15 | 1.00000 |
| rad58          | 6.64294e-15 | 1.00000 | 6.64294e-15 | 1.00000 |
| rad34          | 6.25015e-15 | 1.00000 | 6.25015e-15 | 1.00000 |
| rad45          | 5.40119e-15 | 1.00000 | 5.40119e-15 | 1.00000 |
| rad51          | 4.23304e-15 | 1.00000 | 4.23304e-15 | 1.00000 |
| rad41          | 1.88408e-15 | 1.00000 | 1.88408e-15 | 1.00000 |
| rad42          | 1.00992e-15 | 1.00000 | 1.00992e-15 | 1.00000 |
| rad36          | 3.49238e-16 | 1.00000 | 3.49238e-16 | 1.00000 |
| rad22          | 2.55201e-16 | 1.00000 | 2.55201e-16 | 1.00000 |
| rad65          | 1.15698e-16 | 1.00000 | 1.15698e-16 | 1.00000 |
| rad33          | 8.07181e-17 | 1.00000 | 8.07181e-17 | 1.00000 |
| rad14          | 7.55326e-17 | 1.00000 | 7.55326e-17 | 1.00000 |
| rad15          | 6.95918e-17 | 1.00000 | 6.95918e-17 | 1.00000 |
| rad27          | 6.67248e-17 | 1.00000 | 6.67248e-17 | 1.00000 |
| rad53          | 4.67913e-17 | 1.00000 | 4.67913e-17 | 1.00000 |
| rad25          | 3.16467e-17 | 1.00000 | 3.16467e-17 | 1.00000 |
| rad64          | 1.64144e-17 | 1.00000 | 1.64144e-17 | 1.00000 |
| rad61          | 7.50863e-18 | 1.00000 | 7.50863e-18 | 1.00000 |
| rad56          | 7.06718e-19 | 1.00000 | 7.06718e-19 | 1.00000 |
| rad68syn       | 9.52110e-20 | 1.00000 | 9.52110e-20 | 1.00000 |
| rad68anti      | 7.00487e-20 | 1.00000 | 7.00487e-20 | 1.00000 |
| rad31          | 6.16980e-21 | 1.00000 | 6.16980e-21 | 1.00000 |
| rad19anti      | 4.44470e-21 | 1.00000 | 4.44470e-21 | 1.00000 |
| rad5           | 4.24160e-21 | 1.00000 | 4.24160e-21 | 1.00000 |
| rad20          | 3.67238e-21 | 1.00000 | 3.67238e-21 | 1.00000 |
| rad21          | 2.54248e-21 | 1.00000 | 2.54248e-21 | 1.00000 |
| rad40syn       | 2.30006e-21 | 1.00000 | 2.30006e-21 | 1.00000 |
| rad40anti      | 1.82787e-21 | 1.00000 | 1.82787e-21 | 1.00000 |
| rad18          | 1.49449e-21 | 1.00000 | 1.49449e-21 | 1.00000 |
| rad12          | 7.24326e-22 | 1.00000 | 7.24326e-22 | 1.00000 |
| PAH8+H         | 6.07964e-22 | 1.00000 | 6.07964e-22 | 1.00000 |
| rad73          | 9.33443e-23 | 1.00000 | 9.33443e-23 | 1.00000 |
| rad24          | 5.22656e-23 | 1.00000 | 5.22656e-23 | 1.00000 |
| rad71          | 1.42459e-24 | 1.00000 | 1.42459e-24 | 1.00000 |
| rad47          | 2.08753e-25 | 1.00000 | 2.08753e-25 | 1.00000 |
| rad19syn       | 1.48910e-29 | 1.00000 | 1.48910e-29 | 1.00000 |
| rad8           | 5.10927e-54 | 1.00000 | 5.10927e-54 | 1.00000 |

1.00000000 Pa, 290.000000 K

| Rate constant             | True (fraction)        | Effective (fraction)   |
|---------------------------|------------------------|------------------------|
| Total                     | 3.81171e-14 (1.00 )    | 3.81171e-14 (1.00 )    |
| Formation of rad19        | 3.80733e-14 (0.999 )   | 3.80733e-14 (0.999 )   |
| H-abstraction to cyc2enyl | 4.36868e-17 (0.00115 ) | 4.36868e-17 (0.00115 ) |
| H-abstraction to cyc1enyl | 1.56861e-19 (4.12e-06) | 1.56861e-19 (4.12e-06) |

| species                       | PYtrue      | Cumul    | PYeffective | Cumul    |
|-------------------------------|-------------|----------|-------------|----------|
| Indene+H                      | 0.998284    | 0.998284 | 0.998284    | 0.998284 |
| Benzene+cycloprop-2-enylidene | 0.00114612  | 0.999431 | 0.00114612  | 0.999431 |
| PhCHCCH2+H                    | 0.000532547 | 0.999963 | 0.000532547 | 0.999963 |
| PhCCH+CH3                     | 9.55302e-06 | 0.999973 | 9.55302e-06 | 0.999973 |
| C2H2+PhCH2                    | 8.43955e-06 | 0.999981 | 8.43955e-06 | 0.999981 |
| PhCCCH3+H                     | 6.05257e-06 | 0.999987 | 6.05257e-06 | 0.999987 |
| Ph+MeAc                       | 5.66622e-06 | 0.999993 | 5.66622e-06 | 0.999993 |
| Benzene+cycloprop-1-enylidene | 4.11523e-06 | 0.999997 | 4.11523e-06 | 0.999997 |

|                |             |          |             |          |
|----------------|-------------|----------|-------------|----------|
| rad67          | 1.62987e-06 | 0.999999 | 1.62987e-06 | 0.999999 |
| Ph+Allene      | 7.77487e-07 | 0.999999 | 7.77487e-07 | 0.999999 |
| rad35          | 6.86202e-07 | 1.00000  | 6.86202e-07 | 1.00000  |
| PhCH2CCH+H     | 1.27666e-07 | 1.00000  | 1.27666e-07 | 1.00000  |
| PAH7+H         | 7.83540e-08 | 1.00000  | 7.83540e-08 | 1.00000  |
| rad6           | 7.76226e-08 | 1.00000  | 7.76226e-08 | 1.00000  |
| rad37          | 2.32338e-08 | 1.00000  | 2.32338e-08 | 1.00000  |
| rad39          | 2.19762e-08 | 1.00000  | 2.19762e-08 | 1.00000  |
| rad30          | 1.34438e-08 | 1.00000  | 1.34438e-08 | 1.00000  |
| PAH9+H         | 1.27533e-09 | 1.00000  | 1.27533e-09 | 1.00000  |
| rad38          | 6.54678e-10 | 1.00000  | 6.54678e-10 | 1.00000  |
| PhcycC3H3_A+H  | 2.32187e-10 | 1.00000  | 2.32187e-10 | 1.00000  |
| PAH10+CH3      | 1.61768e-10 | 1.00000  | 1.61768e-10 | 1.00000  |
| rad60syn       | 9.86061e-11 | 1.00000  | 9.86061e-11 | 1.00000  |
| rad28          | 8.78691e-11 | 1.00000  | 8.78691e-11 | 1.00000  |
| rad2           | 8.24986e-11 | 1.00000  | 8.24986e-11 | 1.00000  |
| PAH3+H         | 7.65294e-11 | 1.00000  | 7.65294e-11 | 1.00000  |
| rad60anti      | 5.04517e-11 | 1.00000  | 5.04517e-11 | 1.00000  |
| rad46          | 4.40747e-11 | 1.00000  | 4.40747e-11 | 1.00000  |
| rad59          | 1.42300e-11 | 1.00000  | 1.42300e-11 | 1.00000  |
| rad7           | 1.08416e-11 | 1.00000  | 1.08416e-11 | 1.00000  |
| rad26          | 1.08199e-11 | 1.00000  | 1.08199e-11 | 1.00000  |
| PhcycC3H3_B+H  | 6.32669e-12 | 1.00000  | 6.32669e-12 | 1.00000  |
| rad1           | 6.20165e-12 | 1.00000  | 6.20165e-12 | 1.00000  |
| rad10          | 5.56451e-12 | 1.00000  | 5.56451e-12 | 1.00000  |
| rad54          | 5.49259e-12 | 1.00000  | 5.49259e-12 | 1.00000  |
| Phenyl+cycC3H4 | 5.36584e-12 | 1.00000  | 0.00000     | 1.00000  |
| rad43          | 4.77732e-12 | 1.00000  | 4.77732e-12 | 1.00000  |
| rad11          | 3.20358e-12 | 1.00000  | 3.20358e-12 | 1.00000  |
| rad62          | 1.04677e-12 | 1.00000  | 1.04677e-12 | 1.00000  |
| rad50          | 7.64529e-13 | 1.00000  | 7.64529e-13 | 1.00000  |
| rad3           | 7.27421e-13 | 1.00000  | 7.27421e-13 | 1.00000  |
| rad4           | 3.85068e-13 | 1.00000  | 3.85068e-13 | 1.00000  |
| rad70          | 2.21896e-13 | 1.00000  | 2.21896e-13 | 1.00000  |
| rad23          | 1.92300e-13 | 1.00000  | 1.92300e-13 | 1.00000  |
| PAH1+H         | 1.50989e-13 | 1.00000  | 1.50989e-13 | 1.00000  |
| rad9           | 1.16896e-13 | 1.00000  | 1.16896e-13 | 1.00000  |
| rad55          | 9.63888e-14 | 1.00000  | 9.63888e-14 | 1.00000  |
| rad13          | 3.72698e-14 | 1.00000  | 3.72698e-14 | 1.00000  |
| rad52          | 9.93863e-15 | 1.00000  | 9.93863e-15 | 1.00000  |
| rad58          | 8.70907e-15 | 1.00000  | 8.70907e-15 | 1.00000  |
| rad34          | 8.52255e-15 | 1.00000  | 8.52255e-15 | 1.00000  |
| rad51          | 5.59736e-15 | 1.00000  | 5.59736e-15 | 1.00000  |
| rad45          | 4.28623e-15 | 1.00000  | 4.28623e-15 | 1.00000  |
| rad41          | 2.57513e-15 | 1.00000  | 2.57513e-15 | 1.00000  |
| rad42          | 1.34902e-15 | 1.00000  | 1.34902e-15 | 1.00000  |
| rad36          | 2.79290e-16 | 1.00000  | 2.79290e-16 | 1.00000  |
| rad22          | 2.00729e-16 | 1.00000  | 2.00729e-16 | 1.00000  |
| rad65          | 1.54922e-16 | 1.00000  | 1.54922e-16 | 1.00000  |
| rad53          | 7.36381e-17 | 1.00000  | 7.36381e-17 | 1.00000  |
| rad33          | 6.66848e-17 | 1.00000  | 6.66848e-17 | 1.00000  |
| rad15          | 6.63442e-17 | 1.00000  | 6.63442e-17 | 1.00000  |
| rad14          | 6.18204e-17 | 1.00000  | 6.18204e-17 | 1.00000  |
| rad27          | 5.47786e-17 | 1.00000  | 5.47786e-17 | 1.00000  |
| rad64          | 2.65552e-17 | 1.00000  | 2.65552e-17 | 1.00000  |
| rad25          | 2.60025e-17 | 1.00000  | 2.60025e-17 | 1.00000  |
| rad61          | 1.32864e-17 | 1.00000  | 1.32864e-17 | 1.00000  |
| rad56          | 1.30978e-18 | 1.00000  | 1.30978e-18 | 1.00000  |
| rad68syn       | 1.78359e-19 | 1.00000  | 1.78359e-19 | 1.00000  |
| rad68anti      | 1.30687e-19 | 1.00000  | 1.30687e-19 | 1.00000  |
| rad19anti      | 1.61372e-20 | 1.00000  | 1.61372e-20 | 1.00000  |
| rad31          | 5.73349e-21 | 1.00000  | 5.73349e-21 | 1.00000  |
| rad40syn       | 4.82987e-21 | 1.00000  | 4.82987e-21 | 1.00000  |
| rad40anti      | 3.83097e-21 | 1.00000  | 3.83097e-21 | 1.00000  |
| rad5           | 3.31364e-21 | 1.00000  | 3.31364e-21 | 1.00000  |
| rad20          | 3.19844e-21 | 1.00000  | 3.19844e-21 | 1.00000  |
| rad21          | 2.22423e-21 | 1.00000  | 2.22423e-21 | 1.00000  |
| PAH8+H         | 1.38012e-21 | 1.00000  | 1.38012e-21 | 1.00000  |
| rad18          | 1.22599e-21 | 1.00000  | 1.22599e-21 | 1.00000  |
| rad12          | 7.05062e-22 | 1.00000  | 7.05062e-22 | 1.00000  |
| rad73          | 1.98668e-22 | 1.00000  | 1.98668e-22 | 1.00000  |
| rad24          | 4.20643e-23 | 1.00000  | 4.20643e-23 | 1.00000  |
| rad71          | 3.34459e-24 | 1.00000  | 3.34459e-24 | 1.00000  |
| rad47          | 2.51840e-25 | 1.00000  | 2.51840e-25 | 1.00000  |
| rad19syn       | 6.95958e-29 | 1.00000  | 6.95958e-29 | 1.00000  |
| rad8           | 8.09292e-54 | 1.00000  | 8.09292e-54 | 1.00000  |

1.00000000 Pa, 300.000000 K

=====  
Rate constant | True (fraction)                      Effective (fraction)

|                           |                        |                        |
|---------------------------|------------------------|------------------------|
| Total                     | 5.34809e-14 (1.00 )    | 5.34809e-14 (1.00 )    |
| Formation of rad19        | 5.34010e-14 (0.999 )   | 5.34010e-14 (0.999 )   |
| H-abstraction to cyc2enyl | 7.95823e-17 (0.00149 ) | 7.95823e-17 (0.00149 ) |
| H-abstraction to cyclenyl | 3.44981e-19 (6.45e-06) | 3.44981e-19 (6.45e-06) |

| species                       | PYtrue      | Cumul    | PYeffective | Cumul    |
|-------------------------------|-------------|----------|-------------|----------|
| Indene+H                      | 0.997940    | 0.997940 | 0.997940    | 0.997940 |
| Benzene+cycloprop-2-enylidene | 0.00148805  | 0.999428 | 0.00148805  | 0.999428 |
| PhCHCCH2+H                    | 0.000529168 | 0.999958 | 0.000529168 | 0.999958 |
| PhCCH+CH3                     | 1.04124e-05 | 0.999968 | 1.04124e-05 | 0.999968 |
| C2H2+PhCH2                    | 9.84766e-06 | 0.999978 | 9.84766e-06 | 0.999978 |
| Benzene+cycloprop-1-enylidene | 6.45054e-06 | 0.999984 | 6.45054e-06 | 0.999984 |
| PhCCCH3+H                     | 6.35965e-06 | 0.999991 | 6.35965e-06 | 0.999991 |
| Ph+MeAc                       | 5.98344e-06 | 0.999997 | 5.98344e-06 | 0.999997 |
| rad67                         | 1.76684e-06 | 0.999998 | 1.76684e-06 | 0.999998 |
| Ph+Allene                     | 7.91877e-07 | 0.999999 | 7.91877e-07 | 0.999999 |
| rad35                         | 7.30869e-07 | 1.000000 | 7.30869e-07 | 1.000000 |
| PhCH2CCH+H                    | 1.57206e-07 | 1.000000 | 1.57206e-07 | 1.000000 |
| PAH7+H                        | 9.74914e-08 | 1.000000 | 9.74914e-08 | 1.000000 |
| rad6                          | 8.33838e-08 | 1.000000 | 8.33838e-08 | 1.000000 |
| rad37                         | 2.82510e-08 | 1.000000 | 2.82510e-08 | 1.000000 |
| rad39                         | 2.40444e-08 | 1.000000 | 2.40444e-08 | 1.000000 |
| rad30                         | 1.38998e-08 | 1.000000 | 1.38998e-08 | 1.000000 |
| PAH9+H                        | 1.64229e-09 | 1.000000 | 1.64229e-09 | 1.000000 |
| rad38                         | 7.59303e-10 | 1.000000 | 7.59303e-10 | 1.000000 |
| PhcycC3H3_A+H                 | 3.25258e-10 | 1.000000 | 3.25258e-10 | 1.000000 |
| PAH10+CH3                     | 2.36710e-10 | 1.000000 | 2.36710e-10 | 1.000000 |
| rad60syn                      | 1.06447e-10 | 1.000000 | 1.06447e-10 | 1.000000 |
| PAH3+H                        | 9.81093e-11 | 1.000000 | 9.81093e-11 | 1.000000 |
| rad28                         | 9.38544e-11 | 1.000000 | 9.38544e-11 | 1.000000 |
| rad2                          | 8.53150e-11 | 1.000000 | 8.53150e-11 | 1.000000 |
| rad60anti                     | 5.49555e-11 | 1.000000 | 5.49555e-11 | 1.000000 |
| rad46                         | 5.32141e-11 | 1.000000 | 5.32141e-11 | 1.000000 |
| rad9                          | 4.88268e-11 | 1.000000 | 4.88268e-11 | 1.000000 |
| rad59                         | 1.66636e-11 | 1.000000 | 1.66636e-11 | 1.000000 |
| rad7                          | 1.16692e-11 | 1.000000 | 1.16692e-11 | 1.000000 |
| rad26                         | 1.11370e-11 | 1.000000 | 1.11370e-11 | 1.000000 |
| PhcycC3H3_B+H                 | 1.05898e-11 | 1.000000 | 1.05898e-11 | 1.000000 |
| Phenyl+cycC3H4                | 8.20984e-12 | 1.000000 | 0.000000    | 1.000000 |
| rad54                         | 7.37759e-12 | 1.000000 | 7.37759e-12 | 1.000000 |
| rad1                          | 6.42883e-12 | 1.000000 | 6.42883e-12 | 1.000000 |
| rad43                         | 5.63758e-12 | 1.000000 | 5.63758e-12 | 1.000000 |
| rad10                         | 5.45621e-12 | 1.000000 | 5.45621e-12 | 1.000000 |
| rad11                         | 3.26571e-12 | 1.000000 | 3.26571e-12 | 1.000000 |
| rad62                         | 1.23774e-12 | 1.000000 | 1.23774e-12 | 1.000000 |
| rad50                         | 1.00697e-12 | 1.000000 | 1.00697e-12 | 1.000000 |
| rad3                          | 7.92795e-13 | 1.000000 | 7.92795e-13 | 1.000000 |
| rad4                          | 3.94260e-13 | 1.000000 | 3.94260e-13 | 1.000000 |
| rad70                         | 3.04584e-13 | 1.000000 | 3.04584e-13 | 1.000000 |
| rad23                         | 2.58854e-13 | 1.000000 | 2.58854e-13 | 1.000000 |
| PAH1+H                        | 1.89682e-13 | 1.000000 | 1.89682e-13 | 1.000000 |
| rad55                         | 1.29335e-13 | 1.000000 | 1.29335e-13 | 1.000000 |
| rad13                         | 4.61978e-14 | 1.000000 | 4.61978e-14 | 1.000000 |
| rad15                         | 2.99246e-14 | 1.000000 | 2.99246e-14 | 1.000000 |
| rad52                         | 1.42379e-14 | 1.000000 | 1.42379e-14 | 1.000000 |
| rad34                         | 1.25627e-14 | 1.000000 | 1.25627e-14 | 1.000000 |
| rad58                         | 1.10953e-14 | 1.000000 | 1.10953e-14 | 1.000000 |
| rad51                         | 8.07817e-15 | 1.000000 | 8.07817e-15 | 1.000000 |
| rad45                         | 6.58055e-15 | 1.000000 | 6.58055e-15 | 1.000000 |
| rad41                         | 3.57784e-15 | 1.000000 | 3.57784e-15 | 1.000000 |
| rad42                         | 1.80463e-15 | 1.000000 | 1.80463e-15 | 1.000000 |
| rad22                         | 4.06401e-16 | 1.000000 | 4.06401e-16 | 1.000000 |
| rad65                         | 2.28346e-16 | 1.000000 | 2.28346e-16 | 1.000000 |
| rad36                         | 2.24284e-16 | 1.000000 | 2.24284e-16 | 1.000000 |
| rad19anti                     | 1.54660e-16 | 1.000000 | 1.54660e-16 | 1.000000 |
| rad53                         | 1.28063e-16 | 1.000000 | 1.28063e-16 | 1.000000 |
| rad33                         | 1.03198e-16 | 1.000000 | 1.03198e-16 | 1.000000 |
| rad14                         | 7.54270e-17 | 1.000000 | 7.54270e-17 | 1.000000 |
| rad27                         | 7.33608e-17 | 1.000000 | 7.33608e-17 | 1.000000 |
| rad64                         | 4.94558e-17 | 1.000000 | 4.94558e-17 | 1.000000 |
| rad25                         | 4.00129e-17 | 1.000000 | 4.00129e-17 | 1.000000 |
| rad61                         | 2.75247e-17 | 1.000000 | 2.75247e-17 | 1.000000 |
| rad56                         | 3.01706e-18 | 1.000000 | 3.01706e-18 | 1.000000 |
| rad12                         | 5.06972e-19 | 1.000000 | 5.06972e-19 | 1.000000 |
| rad68syn                      | 3.97071e-19 | 1.000000 | 3.97071e-19 | 1.000000 |
| rad68anti                     | 2.85981e-19 | 1.000000 | 2.85981e-19 | 1.000000 |
| rad20                         | 7.95323e-20 | 1.000000 | 7.95323e-20 | 1.000000 |
| rad21                         | 6.49092e-20 | 1.000000 | 6.49092e-20 | 1.000000 |

|           |             |         |             |         |
|-----------|-------------|---------|-------------|---------|
| rad18     | 3.08941e-20 | 1.00000 | 3.08941e-20 | 1.00000 |
| rad5      | 2.01377e-20 | 1.00000 | 2.01377e-20 | 1.00000 |
| rad31     | 1.85282e-20 | 1.00000 | 1.85282e-20 | 1.00000 |
| rad40syn  | 1.34965e-20 | 1.00000 | 1.34965e-20 | 1.00000 |
| rad40anti | 1.03063e-20 | 1.00000 | 1.03063e-20 | 1.00000 |
| PAH8+H    | 5.55755e-21 | 1.00000 | 5.55755e-21 | 1.00000 |
| rad73     | 6.58394e-22 | 1.00000 | 6.58394e-22 | 1.00000 |
| rad24     | 7.88883e-23 | 1.00000 | 7.88883e-23 | 1.00000 |
| rad71     | 2.14886e-23 | 1.00000 | 2.14886e-23 | 1.00000 |
| rad19syn  | 1.12386e-23 | 1.00000 | 1.12386e-23 | 1.00000 |
| rad47     | 1.72503e-24 | 1.00000 | 1.72503e-24 | 1.00000 |
| rad72     | 4.78387e-30 | 1.00000 | 4.78387e-30 | 1.00000 |
| rad8      | 3.35007e-41 | 1.00000 | 3.35007e-41 | 1.00000 |

1.00000000 Pa, 310.000000 K

| Rate constant             | True (fraction)        | Effective (fraction)   |
|---------------------------|------------------------|------------------------|
| Total                     | 5.92544e-14 (1.00 )    | 5.92544e-14 (1.00 )    |
| Formation of rad19        | 5.91462e-14 (0.998 )   | 5.91462e-14 (0.998 )   |
| H-abstraction to cyc2enyl | 1.07628e-16 (0.00182 ) | 1.07628e-16 (0.00182 ) |
| H-abstraction to cyclenyl | 5.62537e-19 (9.49e-06) | 5.62537e-19 (9.49e-06) |

| species                       | PYtrue      | Cumul    | PYeffective | Cumul    |
|-------------------------------|-------------|----------|-------------|----------|
| Indene+H                      | 0.997537    | 0.997537 | 0.997537    | 0.997537 |
| Benzene+cycloprop-2-enylidene | 0.00181637  | 0.999354 | 0.00181637  | 0.999354 |
| PhCHCCH2+H                    | 0.000598257 | 0.999952 | 0.000598257 | 0.999952 |
| PhCCH+CH3                     | 1.07369e-05 | 0.999963 | 1.07369e-05 | 0.999963 |
| C2H2+PhCH2                    | 9.83154e-06 | 0.999972 | 9.83154e-06 | 0.999972 |
| Benzene+cycloprop-1-enylidene | 9.49359e-06 | 0.999982 | 9.49359e-06 | 0.999982 |
| PhCCCH3+H                     | 6.91701e-06 | 0.999989 | 6.91701e-06 | 0.999989 |
| Ph+MeAc                       | 6.67444e-06 | 0.999996 | 6.67444e-06 | 0.999996 |
| rad67                         | 1.91053e-06 | 0.999997 | 1.91053e-06 | 0.999997 |
| Ph+Allene                     | 9.90749e-07 | 0.999998 | 9.90749e-07 | 0.999998 |
| rad35                         | 7.99484e-07 | 0.999999 | 7.99484e-07 | 0.999999 |
| PhCH2CCH+H                    | 1.69117e-07 | 0.999999 | 1.69117e-07 | 0.999999 |
| PAH7+H                        | 9.62100e-08 | 1.000000 | 9.62100e-08 | 1.000000 |
| rad6                          | 5.18038e-08 | 1.000000 | 5.18038e-08 | 1.000000 |
| rad37                         | 2.86042e-08 | 1.000000 | 2.86042e-08 | 1.000000 |
| rad39                         | 2.69224e-08 | 1.000000 | 2.69224e-08 | 1.000000 |
| rad30                         | 1.58220e-08 | 1.000000 | 1.58220e-08 | 1.000000 |
| PAH9+H                        | 1.59714e-09 | 1.000000 | 1.59714e-09 | 1.000000 |
| rad38                         | 8.43287e-10 | 1.000000 | 8.43287e-10 | 1.000000 |
| PhcycC3H3_A+H                 | 4.09021e-10 | 1.000000 | 4.09021e-10 | 1.000000 |
| PAH10+CH3                     | 2.44120e-10 | 1.000000 | 2.44120e-10 | 1.000000 |
| rad60syn                      | 1.24459e-10 | 1.000000 | 1.24459e-10 | 1.000000 |
| PAH3+H                        | 1.05218e-10 | 1.000000 | 1.05218e-10 | 1.000000 |
| rad60anti                     | 6.40658e-11 | 1.000000 | 6.40658e-11 | 1.000000 |
| rad28                         | 5.83875e-11 | 1.000000 | 5.83875e-11 | 1.000000 |
| rad46                         | 5.76893e-11 | 1.000000 | 5.76893e-11 | 1.000000 |
| rad2                          | 5.48881e-11 | 1.000000 | 5.48881e-11 | 1.000000 |
| rad59                         | 1.92713e-11 | 1.000000 | 1.92713e-11 | 1.000000 |
| PhcycC3H3_B+H                 | 1.41409e-11 | 1.000000 | 1.41409e-11 | 1.000000 |
| Phenyl+cycC3H4                | 1.07882e-11 | 1.000000 | 0.000000    | 1.000000 |
| rad54                         | 8.41858e-12 | 1.000000 | 8.41858e-12 | 1.000000 |
| rad26                         | 7.23241e-12 | 1.000000 | 7.23241e-12 | 1.000000 |
| rad7                          | 7.18625e-12 | 1.000000 | 7.18625e-12 | 1.000000 |
| rad43                         | 6.79574e-12 | 1.000000 | 6.79574e-12 | 1.000000 |
| rad1                          | 4.26649e-12 | 1.000000 | 4.26649e-12 | 1.000000 |
| rad10                         | 3.69910e-12 | 1.000000 | 3.69910e-12 | 1.000000 |
| rad11                         | 2.11939e-12 | 1.000000 | 2.11939e-12 | 1.000000 |
| rad62                         | 1.48566e-12 | 1.000000 | 1.48566e-12 | 1.000000 |
| rad50                         | 1.13661e-12 | 1.000000 | 1.13661e-12 | 1.000000 |
| rad3                          | 4.84193e-13 | 1.000000 | 4.84193e-13 | 1.000000 |
| rad70                         | 3.70440e-13 | 1.000000 | 3.70440e-13 | 1.000000 |
| PAH1+H                        | 2.74939e-13 | 1.000000 | 2.74939e-13 | 1.000000 |
| rad4                          | 2.58771e-13 | 1.000000 | 2.58771e-13 | 1.000000 |
| rad55                         | 1.60816e-13 | 1.000000 | 1.60816e-13 | 1.000000 |
| rad9                          | 1.22844e-13 | 1.000000 | 1.22844e-13 | 1.000000 |
| rad23                         | 1.21414e-13 | 1.000000 | 1.21414e-13 | 1.000000 |
| rad13                         | 2.49959e-14 | 1.000000 | 2.49959e-14 | 1.000000 |
| rad52                         | 1.60334e-14 | 1.000000 | 1.60334e-14 | 1.000000 |
| rad34                         | 1.57233e-14 | 1.000000 | 1.57233e-14 | 1.000000 |
| rad58                         | 1.50002e-14 | 1.000000 | 1.50002e-14 | 1.000000 |
| rad51                         | 9.81986e-15 | 1.000000 | 9.81986e-15 | 1.000000 |
| rad41                         | 4.76237e-15 | 1.000000 | 4.76237e-15 | 1.000000 |
| rad45                         | 2.70867e-15 | 1.000000 | 2.70867e-15 | 1.000000 |
| rad42                         | 2.38557e-15 | 1.000000 | 2.38557e-15 | 1.000000 |
| rad65                         | 2.78006e-16 | 1.000000 | 2.78006e-16 | 1.000000 |



|           |             |          |             |          |
|-----------|-------------|----------|-------------|----------|
| rad36     | 1.79587e-16 | 1.000000 | 1.79587e-16 | 1.000000 |
| rad53     | 1.74973e-16 | 1.000000 | 1.74973e-16 | 1.000000 |
| rad22     | 1.24407e-16 | 1.000000 | 1.24407e-16 | 1.000000 |
| rad15     | 6.94507e-17 | 1.000000 | 6.94507e-17 | 1.000000 |
| rad64     | 6.59885e-17 | 1.000000 | 6.59885e-17 | 1.000000 |
| rad33     | 4.52792e-17 | 1.000000 | 4.52792e-17 | 1.000000 |
| rad14     | 4.12021e-17 | 1.000000 | 4.12021e-17 | 1.000000 |
| rad61     | 3.84213e-17 | 1.000000 | 3.84213e-17 | 1.000000 |
| rad27     | 3.67306e-17 | 1.000000 | 3.67306e-17 | 1.000000 |
| rad25     | 1.74632e-17 | 1.000000 | 1.74632e-17 | 1.000000 |
| rad56     | 4.08907e-18 | 1.000000 | 4.08907e-18 | 1.000000 |
| rad68syn  | 5.66339e-19 | 1.000000 | 5.66339e-19 | 1.000000 |
| rad68anti | 4.12172e-19 | 1.000000 | 4.12172e-19 | 1.000000 |
| rad19anti | 2.17295e-19 | 1.000000 | 2.17295e-19 | 1.000000 |
| rad40syn  | 1.84067e-20 | 1.000000 | 1.84067e-20 | 1.000000 |
| rad40anti | 1.45516e-20 | 1.000000 | 1.45516e-20 | 1.000000 |
| PAH8+H    | 5.95428e-21 | 1.000000 | 5.95428e-21 | 1.000000 |
| rad31     | 5.10487e-21 | 1.000000 | 5.10487e-21 | 1.000000 |
| rad20     | 2.44490e-21 | 1.000000 | 2.44490e-21 | 1.000000 |
| rad5      | 2.02802e-21 | 1.000000 | 2.02802e-21 | 1.000000 |
| rad21     | 1.71668e-21 | 1.000000 | 1.71668e-21 | 1.000000 |
| rad18     | 8.30890e-22 | 1.000000 | 8.30890e-22 | 1.000000 |
| rad73     | 7.76500e-22 | 1.000000 | 7.76500e-22 | 1.000000 |
| rad12     | 7.72106e-22 | 1.000000 | 7.72106e-22 | 1.000000 |
| rad24     | 2.73882e-23 | 1.000000 | 2.73882e-23 | 1.000000 |
| rad71     | 1.52379e-23 | 1.000000 | 1.52379e-23 | 1.000000 |
| rad47     | 3.90939e-25 | 1.000000 | 3.90939e-25 | 1.000000 |
| rad19syn  | 1.62279e-27 | 1.000000 | 1.62279e-27 | 1.000000 |
| rad8      | 2.17063e-53 | 1.000000 | 2.17063e-53 | 1.000000 |

1.00000000 Pa, 400.000000 K

| Rate constant             | True (fraction)        | Effective (fraction)   |
|---------------------------|------------------------|------------------------|
| Total                     | 1.29463e-13 (1.00 )    | 1.29463e-13 (1.00 )    |
| Formation of rad19        | 1.28526e-13 (0.993 )   | 1.28526e-13 (0.993 )   |
| H-abstraction to cyc2enyl | 9.19357e-16 (0.00710 ) | 9.19357e-16 (0.00710 ) |
| H-abstraction to cyclenyl | 1.69485e-17 (0.000131) | 1.69485e-17 (0.000131) |

| species                       | PYtrue      | Cumul    | PYeffective | Cumul    |
|-------------------------------|-------------|----------|-------------|----------|
| Indene+H                      | 0.991683    | 0.991683 | 0.991683    | 0.991683 |
| Benzene+cycloprop-2-enylidene | 0.00710133  | 0.998784 | 0.00710133  | 0.998784 |
| PhCHCCH2+H                    | 0.00100541  | 0.999789 | 0.00100541  | 0.999789 |
| Benzene+cycloprop-1-enylidene | 0.000130914 | 0.999920 | 0.000130914 | 0.999920 |
| C2H2+PhCH2                    | 2.21810e-05 | 0.999942 | 2.21810e-05 | 0.999942 |
| PhCCH+CH3                     | 1.94823e-05 | 0.999962 | 1.94823e-05 | 0.999962 |
| Ph+MeAc                       | 1.45082e-05 | 0.999976 | 1.45082e-05 | 0.999976 |
| PhCCCH3+H                     | 1.31908e-05 | 0.999990 | 1.31908e-05 | 0.999990 |
| rad67                         | 4.21993e-06 | 0.999994 | 4.21993e-06 | 0.999994 |
| Ph+Allene                     | 2.94688e-06 | 0.999997 | 2.94688e-06 | 0.999997 |
| rad35                         | 1.68837e-06 | 0.999999 | 1.68837e-06 | 0.999999 |
| PhCH2CCH+H                    | 6.87162e-07 | 0.999999 | 6.87162e-07 | 0.999999 |
| PAH7+H                        | 2.87159e-07 | 1.000000 | 2.87159e-07 | 1.000000 |
| rad37                         | 8.81612e-08 | 1.000000 | 8.81612e-08 | 1.000000 |
| rad39                         | 6.98840e-08 | 1.000000 | 6.98840e-08 | 1.000000 |
| rad30                         | 3.40959e-08 | 1.000000 | 3.40959e-08 | 1.000000 |
| rad6                          | 1.44275e-08 | 1.000000 | 1.44275e-08 | 1.000000 |
| PAH9+H                        | 5.63720e-09 | 1.000000 | 5.63720e-09 | 1.000000 |
| PhcycC3H3_A+H                 | 4.88896e-09 | 1.000000 | 4.88896e-09 | 1.000000 |
| rad38                         | 3.06174e-09 | 1.000000 | 3.06174e-09 | 1.000000 |
| PAH10+CH3                     | 1.94075e-09 | 1.000000 | 1.94075e-09 | 1.000000 |
| PAH3+H                        | 5.34017e-10 | 1.000000 | 5.34017e-10 | 1.000000 |
| PhcycC3H3_B+H                 | 4.15161e-10 | 1.000000 | 4.15161e-10 | 1.000000 |
| rad60syn                      | 3.78774e-10 | 1.000000 | 3.78774e-10 | 1.000000 |
| rad9                          | 2.44746e-10 | 1.000000 | 2.44746e-10 | 1.000000 |
| rad46                         | 2.29822e-10 | 1.000000 | 2.29822e-10 | 1.000000 |
| Phenyl+cycC3H4                | 2.22328e-10 | 1.000000 | 0.000000    | 1.000000 |
| rad60anti                     | 2.01661e-10 | 1.000000 | 2.01661e-10 | 1.000000 |
| rad59                         | 8.48583e-11 | 1.000000 | 8.48583e-11 | 1.000000 |
| rad54                         | 6.33663e-11 | 1.000000 | 6.33663e-11 | 1.000000 |
| rad43                         | 3.46751e-11 | 1.000000 | 3.46751e-11 | 1.000000 |
| rad2                          | 1.67667e-11 | 1.000000 | 1.67667e-11 | 1.000000 |
| rad28                         | 1.59833e-11 | 1.000000 | 1.59833e-11 | 1.000000 |
| rad50                         | 8.24072e-12 | 1.000000 | 8.24072e-12 | 1.000000 |
| rad62                         | 7.25998e-12 | 1.000000 | 7.25998e-12 | 1.000000 |
| rad70                         | 3.82793e-12 | 1.000000 | 3.82793e-12 | 1.000000 |
| PAH1+H                        | 3.59249e-12 | 1.000000 | 3.59249e-12 | 1.000000 |
| rad26                         | 2.18876e-12 | 1.000000 | 2.18876e-12 | 1.000000 |
| rad7                          | 2.00717e-12 | 1.000000 | 2.00717e-12 | 1.000000 |

|           |             |          |             |          |
|-----------|-------------|----------|-------------|----------|
| rad55     | 1.58725e-12 | 1.000000 | 1.58725e-12 | 1.000000 |
| rad1      | 1.56037e-12 | 1.000000 | 1.56037e-12 | 1.000000 |
| rad10     | 1.06938e-12 | 1.000000 | 1.06938e-12 | 1.000000 |
| rad11     | 5.65569e-13 | 1.000000 | 5.65569e-13 | 1.000000 |
| rad19anti | 4.88087e-13 | 1.000000 | 4.88087e-13 | 1.000000 |
| rad34     | 2.42649e-13 | 1.000000 | 2.42649e-13 | 1.000000 |
| rad52     | 1.71785e-13 | 1.000000 | 1.71785e-13 | 1.000000 |
| rad58     | 1.69132e-13 | 1.000000 | 1.69132e-13 | 1.000000 |
| rad3      | 1.65758e-13 | 1.000000 | 1.65758e-13 | 1.000000 |
| rad15     | 1.53247e-13 | 1.000000 | 1.53247e-13 | 1.000000 |
| rad51     | 1.42355e-13 | 1.000000 | 1.42355e-13 | 1.000000 |
| rad23     | 1.41997e-13 | 1.000000 | 1.41997e-13 | 1.000000 |
| rad4      | 8.72942e-14 | 1.000000 | 8.72942e-14 | 1.000000 |
| rad41     | 6.83317e-14 | 1.000000 | 6.83317e-14 | 1.000000 |
| rad42     | 2.71122e-14 | 1.000000 | 2.71122e-14 | 1.000000 |
| rad13     | 8.81122e-15 | 1.000000 | 8.81122e-15 | 1.000000 |
| rad53     | 6.85399e-15 | 1.000000 | 6.85399e-15 | 1.000000 |
| rad45     | 5.31431e-15 | 1.000000 | 5.31431e-15 | 1.000000 |
| rad65     | 4.37676e-15 | 1.000000 | 4.37676e-15 | 1.000000 |
| rad61     | 3.43214e-15 | 1.000000 | 3.43214e-15 | 1.000000 |
| rad64     | 3.04699e-15 | 1.000000 | 3.04699e-15 | 1.000000 |
| rad56     | 5.30076e-16 | 1.000000 | 5.30076e-16 | 1.000000 |
| rad36     | 2.03619e-16 | 1.000000 | 2.03619e-16 | 1.000000 |
| rad22     | 1.28323e-16 | 1.000000 | 1.28323e-16 | 1.000000 |
| rad68syn  | 7.47485e-17 | 1.000000 | 7.47485e-17 | 1.000000 |
| rad68anti | 5.24285e-17 | 1.000000 | 5.24285e-17 | 1.000000 |
| rad33     | 2.18044e-17 | 1.000000 | 2.18044e-17 | 1.000000 |
| rad27     | 1.61503e-17 | 1.000000 | 1.61503e-17 | 1.000000 |
| rad14     | 1.58172e-17 | 1.000000 | 1.58172e-17 | 1.000000 |
| rad25     | 7.89703e-18 | 1.000000 | 7.89703e-18 | 1.000000 |
| rad40syn  | 6.39581e-18 | 1.000000 | 6.39581e-18 | 1.000000 |
| PAH8+H    | 5.95103e-18 | 1.000000 | 5.95103e-18 | 1.000000 |
| rad40anti | 4.74794e-18 | 1.000000 | 4.74794e-18 | 1.000000 |
| rad12     | 4.14102e-18 | 1.000000 | 4.14102e-18 | 1.000000 |
| rad19syn  | 2.04434e-18 | 1.000000 | 2.04434e-18 | 1.000000 |
| rad31     | 5.82000e-19 | 1.000000 | 5.82000e-19 | 1.000000 |
| rad73     | 4.88454e-19 | 1.000000 | 4.88454e-19 | 1.000000 |
| rad71     | 5.04010e-20 | 1.000000 | 5.04010e-20 | 1.000000 |
| rad20     | 3.90625e-20 | 1.000000 | 3.90625e-20 | 1.000000 |
| rad21     | 3.56045e-20 | 1.000000 | 3.56045e-20 | 1.000000 |
| rad18     | 8.68450e-21 | 1.000000 | 8.68450e-21 | 1.000000 |
| rad5      | 4.04984e-21 | 1.000000 | 4.04984e-21 | 1.000000 |
| rad24     | 8.06259e-23 | 1.000000 | 8.06259e-23 | 1.000000 |
| rad47     | 7.59020e-23 | 1.000000 | 7.59020e-23 | 1.000000 |
| rad72     | 1.07788e-24 | 1.000000 | 1.07788e-24 | 1.000000 |
| rad8      | 7.07654e-38 | 1.000000 | 7.07654e-38 | 1.000000 |

1.00000000 Pa, 500.000000 K

=====

| Rate constant             | True (fraction)        | Effective (fraction)   |
|---------------------------|------------------------|------------------------|
| Total                     | 2.52837e-13 (1.00 )    | 2.52837e-13 (1.00 )    |
| Formation of rad19        | 2.47941e-13 (0.981 )   | 2.47941e-13 (0.981 )   |
| H-abstraction to cyc2enyl | 4.69058e-15 (0.0186 )  | 4.69058e-15 (0.0186 )  |
| H-abstraction to cyc1enyl | 2.05381e-16 (0.000812) | 2.05381e-16 (0.000812) |

| species                       | PYtrue      | Cumul    | PYeffective | Cumul    |
|-------------------------------|-------------|----------|-------------|----------|
| Indene+H                      | 0.978429    | 0.978429 | 0.978429    | 0.978429 |
| Benzene+cycloprop-2-enylidene | 0.0185518   | 0.996980 | 0.0185518   | 0.996980 |
| PhCHCCH2+H                    | 0.00202456  | 0.999005 | 0.00202456  | 0.999005 |
| Benzene+cycloprop-1-enylidene | 0.000812306 | 0.999817 | 0.000812306 | 0.999817 |
| C2H2+PhCH2                    | 5.13038e-05 | 0.999868 | 5.13038e-05 | 0.999868 |
| PhCCH+CH3                     | 3.71043e-05 | 0.999906 | 3.71043e-05 | 0.999906 |
| Ph+MeAc                       | 3.63065e-05 | 0.999942 | 3.63065e-05 | 0.999942 |
| PhCCCH3+H                     | 2.84438e-05 | 0.999970 | 2.84438e-05 | 0.999970 |
| Ph+Allene                     | 1.09220e-05 | 0.999981 | 1.09220e-05 | 0.999981 |
| rad67                         | 1.05818e-05 | 0.999992 | 1.05818e-05 | 0.999992 |
| rad35                         | 4.10914e-06 | 0.999996 | 4.10914e-06 | 0.999996 |
| PhCH2CCH+H                    | 2.94803e-06 | 0.999999 | 2.94803e-06 | 0.999999 |
| PAH7+H                        | 8.49545e-07 | 1.000000 | 8.49545e-07 | 1.000000 |
| rad37                         | 2.86661e-07 | 1.000000 | 2.86661e-07 | 1.000000 |
| rad39                         | 2.01637e-07 | 1.000000 | 2.01637e-07 | 1.000000 |
| rad30                         | 8.94805e-08 | 1.000000 | 8.94805e-08 | 1.000000 |
| PhcycC3H3_A+H                 | 5.02876e-08 | 1.000000 | 5.02876e-08 | 1.000000 |
| PAH9+H                        | 2.06623e-08 | 1.000000 | 2.06623e-08 | 1.000000 |
| PAH10+CH3                     | 1.44080e-08 | 1.000000 | 1.44080e-08 | 1.000000 |
| rad38                         | 1.31745e-08 | 1.000000 | 1.31745e-08 | 1.000000 |
| PhcycC3H3_B+H                 | 7.81236e-09 | 1.000000 | 7.81236e-09 | 1.000000 |
| rad9                          | 6.19688e-09 | 1.000000 | 6.19688e-09 | 1.000000 |

|                |             |         |             |         |
|----------------|-------------|---------|-------------|---------|
| Phenyl+cycC3H4 | 3.55660e-09 | 1.00000 | 0.00000     | 1.00000 |
| PAH3+H         | 2.97665e-09 | 1.00000 | 2.97665e-09 | 1.00000 |
| rad6           | 2.58945e-09 | 1.00000 | 2.58945e-09 | 1.00000 |
| rad60syn       | 1.43172e-09 | 1.00000 | 1.43172e-09 | 1.00000 |
| rad46          | 1.04796e-09 | 1.00000 | 1.04796e-09 | 1.00000 |
| rad60anti      | 7.84323e-10 | 1.00000 | 7.84323e-10 | 1.00000 |
| rad54          | 4.67674e-10 | 1.00000 | 4.67674e-10 | 1.00000 |
| rad59          | 4.42114e-10 | 1.00000 | 4.42114e-10 | 1.00000 |
| rad43          | 1.96310e-10 | 1.00000 | 1.96310e-10 | 1.00000 |
| rad19anti      | 6.74275e-11 | 1.00000 | 6.74275e-11 | 1.00000 |
| rad50          | 6.65595e-11 | 1.00000 | 6.65595e-11 | 1.00000 |
| PAH1+H         | 4.68534e-11 | 1.00000 | 4.68534e-11 | 1.00000 |
| rad62          | 3.77355e-11 | 1.00000 | 3.77355e-11 | 1.00000 |
| rad70          | 3.75969e-11 | 1.00000 | 3.75969e-11 | 1.00000 |
| rad2           | 2.79956e-11 | 1.00000 | 2.79956e-11 | 1.00000 |
| rad55          | 1.50716e-11 | 1.00000 | 1.50716e-11 | 1.00000 |
| rad23          | 1.29632e-11 | 1.00000 | 1.29632e-11 | 1.00000 |
| rad15          | 4.05482e-12 | 1.00000 | 4.05482e-12 | 1.00000 |
| rad1           | 3.34346e-12 | 1.00000 | 3.34346e-12 | 1.00000 |
| rad34          | 3.21790e-12 | 1.00000 | 3.21790e-12 | 1.00000 |
| rad28          | 2.76252e-12 | 1.00000 | 2.76252e-12 | 1.00000 |
| rad51          | 2.08614e-12 | 1.00000 | 2.08614e-12 | 1.00000 |
| rad58          | 2.05166e-12 | 1.00000 | 2.05166e-12 | 1.00000 |
| rad26          | 1.97508e-12 | 1.00000 | 1.97508e-12 | 1.00000 |
| rad52          | 1.88679e-12 | 1.00000 | 1.88679e-12 | 1.00000 |
| rad10          | 1.51108e-12 | 1.00000 | 1.51108e-12 | 1.00000 |
| rad45          | 1.38034e-12 | 1.00000 | 1.38034e-12 | 1.00000 |
| rad41          | 8.64397e-13 | 1.00000 | 8.64397e-13 | 1.00000 |
| rad7           | 3.67664e-13 | 1.00000 | 3.67664e-13 | 1.00000 |
| rad3           | 3.01051e-13 | 1.00000 | 3.01051e-13 | 1.00000 |
| rad42          | 2.74758e-13 | 1.00000 | 2.74758e-13 | 1.00000 |
| rad53          | 1.70413e-13 | 1.00000 | 1.70413e-13 | 1.00000 |
| rad4           | 1.69599e-13 | 1.00000 | 1.69599e-13 | 1.00000 |
| rad61          | 1.40847e-13 | 1.00000 | 1.40847e-13 | 1.00000 |
| rad11          | 1.05958e-13 | 1.00000 | 1.05958e-13 | 1.00000 |
| rad64          | 7.72656e-14 | 1.00000 | 7.72656e-14 | 1.00000 |
| rad65          | 6.65461e-14 | 1.00000 | 6.65461e-14 | 1.00000 |
| rad36          | 6.56305e-14 | 1.00000 | 6.56305e-14 | 1.00000 |
| rad56          | 2.62263e-14 | 1.00000 | 2.62263e-14 | 1.00000 |
| rad19syn       | 1.45990e-14 | 1.00000 | 1.45990e-14 | 1.00000 |
| rad22          | 6.80797e-15 | 1.00000 | 6.80797e-15 | 1.00000 |
| rad68syn       | 3.88698e-15 | 1.00000 | 3.88698e-15 | 1.00000 |
| rad68anti      | 2.67702e-15 | 1.00000 | 2.67702e-15 | 1.00000 |
| rad13          | 1.87209e-15 | 1.00000 | 1.87209e-15 | 1.00000 |
| PAH8+H         | 8.57176e-16 | 1.00000 | 8.57176e-16 | 1.00000 |
| rad40syn       | 5.58178e-16 | 1.00000 | 5.58178e-16 | 1.00000 |
| rad40anti      | 4.08435e-16 | 1.00000 | 4.08435e-16 | 1.00000 |
| rad12          | 2.71181e-16 | 1.00000 | 2.71181e-16 | 1.00000 |
| rad31          | 1.79130e-16 | 1.00000 | 1.79130e-16 | 1.00000 |
| rad73          | 7.89325e-17 | 1.00000 | 7.89325e-17 | 1.00000 |
| rad27          | 2.71330e-17 | 1.00000 | 2.71330e-17 | 1.00000 |
| rad71          | 2.21257e-17 | 1.00000 | 2.21257e-17 | 1.00000 |
| rad14          | 2.12700e-17 | 1.00000 | 2.12700e-17 | 1.00000 |
| rad33          | 5.50667e-18 | 1.00000 | 5.50667e-18 | 1.00000 |
| rad25          | 1.76272e-18 | 1.00000 | 1.76272e-18 | 1.00000 |
| rad72          | 1.05610e-19 | 1.00000 | 1.05610e-19 | 1.00000 |
| rad21          | 3.92779e-20 | 1.00000 | 3.92779e-20 | 1.00000 |
| rad20          | 3.76632e-20 | 1.00000 | 3.76632e-20 | 1.00000 |
| rad24          | 2.04213e-20 | 1.00000 | 2.04213e-20 | 1.00000 |
| rad47          | 5.02202e-21 | 1.00000 | 5.02202e-21 | 1.00000 |
| rad18          | 4.75214e-21 | 1.00000 | 4.75214e-21 | 1.00000 |
| rad5           | 2.66932e-21 | 1.00000 | 2.66932e-21 | 1.00000 |
| rad8           | 1.63020e-33 | 1.00000 | 1.63020e-33 | 1.00000 |

1.00000000 Pa, 600.000000 K

=====

| Rate constant             | True (fraction)        | Effective (fraction)   |
|---------------------------|------------------------|------------------------|
| Total                     | 4.35570e-13 (1.00 )    | 4.35570e-13 (1.00 )    |
| Formation of rad19        | 4.18892e-13 (0.962 )   | 4.18892e-13 (0.962 )   |
| H-abstraction to cyc2enyl | 1.54751e-14 (0.0355 )  | 1.54751e-14 (0.0355 )  |
| H-abstraction to cyclenyl | 1.20343e-15 (0.00276 ) | 1.20343e-15 (0.00276 ) |

| species                       | PYtrue      | Cumul    | PYeffective | Cumul    |
|-------------------------------|-------------|----------|-------------|----------|
| Indene+H                      | 0.957276    | 0.957276 | 0.957276    | 0.957276 |
| Benzene+cycloprop-2-enylidene | 0.0355285   | 0.992805 | 0.0355285   | 0.992805 |
| PhCHCH2+H                     | 0.00402202  | 0.996827 | 0.00402202  | 0.996827 |
| Benzene+cycloprop-1-enylidene | 0.00276289  | 0.999590 | 0.00276289  | 0.999590 |
| C2H2+PhCH2                    | 0.000111945 | 0.999701 | 0.000111945 | 0.999701 |

|                |             |          |             |          |
|----------------|-------------|----------|-------------|----------|
| Ph+MeAc        | 8.57524e-05 | 0.999787 | 8.57524e-05 | 0.999787 |
| PhCCH+CH3      | 6.75044e-05 | 0.999855 | 6.75044e-05 | 0.999855 |
| PhCCCH3+H      | 5.90442e-05 | 0.999914 | 5.90442e-05 | 0.999914 |
| Ph+Allene      | 3.56485e-05 | 0.999949 | 3.56485e-05 | 0.999949 |
| rad67          | 2.54066e-05 | 0.999975 | 2.54066e-05 | 0.999975 |
| PhCH2CCH+H     | 1.09173e-05 | 0.999986 | 1.09173e-05 | 0.999986 |
| rad35          | 9.63440e-06 | 0.999995 | 9.63440e-06 | 0.999995 |
| PAH7+H         | 2.26592e-06 | 0.999998 | 2.26592e-06 | 0.999998 |
| rad37          | 8.65085e-07 | 0.999998 | 8.65085e-07 | 0.999998 |
| rad39          | 5.19983e-07 | 0.999999 | 5.19983e-07 | 0.999999 |
| PhcycC3H3_A+H  | 3.56705e-07 | 0.999999 | 3.56705e-07 | 0.999999 |
| rad30          | 2.27475e-07 | 1.000000 | 2.27475e-07 | 1.000000 |
| PAH10+CH3      | 8.51440e-08 | 1.000000 | 8.51440e-08 | 1.000000 |
| PhcycC3H3_B+H  | 8.45535e-08 | 1.000000 | 8.45535e-08 | 1.000000 |
| PAH9+H         | 7.13304e-08 | 1.000000 | 7.13304e-08 | 1.000000 |
| rad38          | 5.21525e-08 | 1.000000 | 5.21525e-08 | 1.000000 |
| Phenyl+cycC3H4 | 3.58024e-08 | 1.000000 | 0.000000    | 1.000000 |
| rad9           | 3.19426e-08 | 1.000000 | 3.19426e-08 | 1.000000 |
| PAH3+H         | 1.45770e-08 | 1.000000 | 1.45770e-08 | 1.000000 |
| rad60syn       | 5.04118e-09 | 1.000000 | 5.04118e-09 | 1.000000 |
| rad46          | 4.38009e-09 | 1.000000 | 4.38009e-09 | 1.000000 |
| rad60anti      | 2.82971e-09 | 1.000000 | 2.82971e-09 | 1.000000 |
| rad54          | 2.62975e-09 | 1.000000 | 2.62975e-09 | 1.000000 |
| rad59          | 2.03221e-09 | 1.000000 | 2.03221e-09 | 1.000000 |
| rad6           | 1.08210e-09 | 1.000000 | 1.08210e-09 | 1.000000 |
| rad43          | 9.14749e-10 | 1.000000 | 9.14749e-10 | 1.000000 |
| rad19anti      | 4.95115e-10 | 1.000000 | 4.95115e-10 | 1.000000 |
| rad50          | 4.51480e-10 | 1.000000 | 4.51480e-10 | 1.000000 |
| PAH1+H         | 4.06268e-10 | 1.000000 | 4.06269e-10 | 1.000000 |
| rad70          | 2.63913e-10 | 1.000000 | 2.63913e-10 | 1.000000 |
| rad23          | 2.25241e-10 | 1.000000 | 2.25241e-10 | 1.000000 |
| rad2           | 1.79760e-10 | 1.000000 | 1.79760e-10 | 1.000000 |
| rad62          | 1.58037e-10 | 1.000000 | 1.58037e-10 | 1.000000 |
| rad55          | 1.01574e-10 | 1.000000 | 1.01574e-10 | 1.000000 |
| rad45          | 3.40905e-11 | 1.000000 | 3.40905e-11 | 1.000000 |
| rad34          | 2.81568e-11 | 1.000000 | 2.81568e-11 | 1.000000 |
| rad1           | 2.69730e-11 | 1.000000 | 2.69730e-11 | 1.000000 |
| rad51          | 2.26894e-11 | 1.000000 | 2.26894e-11 | 1.000000 |
| rad15          | 2.03001e-11 | 1.000000 | 2.03001e-11 | 1.000000 |
| rad58          | 1.80086e-11 | 1.000000 | 1.80086e-11 | 1.000000 |
| rad52          | 1.62848e-11 | 1.000000 | 1.62848e-11 | 1.000000 |
| rad41          | 7.28804e-12 | 1.000000 | 7.28804e-12 | 1.000000 |
| rad10          | 5.87955e-12 | 1.000000 | 5.87955e-12 | 1.000000 |
| rad26          | 5.79245e-12 | 1.000000 | 5.79245e-12 | 1.000000 |
| rad61          | 2.71271e-12 | 1.000000 | 2.71271e-12 | 1.000000 |
| rad36          | 2.51907e-12 | 1.000000 | 2.51907e-12 | 1.000000 |
| rad53          | 2.26909e-12 | 1.000000 | 2.26909e-12 | 1.000000 |
| rad3           | 2.16936e-12 | 1.000000 | 2.16937e-12 | 1.000000 |
| rad42          | 1.88231e-12 | 1.000000 | 1.88231e-12 | 1.000000 |
| rad19syn       | 1.52297e-12 | 1.000000 | 1.52297e-12 | 1.000000 |
| rad4           | 1.35786e-12 | 1.000000 | 1.35786e-12 | 1.000000 |
| rad64          | 9.97744e-13 | 1.000000 | 9.97744e-13 | 1.000000 |
| rad28          | 8.92104e-13 | 1.000000 | 8.92104e-13 | 1.000000 |
| rad65          | 7.30007e-13 | 1.000000 | 7.30007e-13 | 1.000000 |
| rad56          | 5.50897e-13 | 1.000000 | 5.50897e-13 | 1.000000 |
| rad7           | 1.62649e-13 | 1.000000 | 1.62649e-13 | 1.000000 |
| rad22          | 1.06264e-13 | 1.000000 | 1.06264e-13 | 1.000000 |
| rad68syn       | 8.65485e-14 | 1.000000 | 8.65485e-14 | 1.000000 |
| rad68anti      | 5.88428e-14 | 1.000000 | 5.88428e-14 | 1.000000 |
| rad11          | 4.91887e-14 | 1.000000 | 4.91887e-14 | 1.000000 |
| PAH8+H         | 4.15853e-14 | 1.000000 | 4.15853e-14 | 1.000000 |
| rad12          | 2.12362e-14 | 1.000000 | 2.12362e-14 | 1.000000 |
| rad40syn       | 1.80930e-14 | 1.000000 | 1.80930e-14 | 1.000000 |
| rad40anti      | 1.32476e-14 | 1.000000 | 1.32476e-14 | 1.000000 |
| rad73          | 1.17313e-14 | 1.000000 | 1.17313e-14 | 1.000000 |
| rad71          | 1.17253e-14 | 1.000000 | 1.17253e-14 | 1.000000 |
| rad31          | 3.25379e-15 | 1.000000 | 3.25379e-15 | 1.000000 |
| rad13          | 1.04147e-15 | 1.000000 | 1.04147e-15 | 1.000000 |
| rad72          | 3.08028e-16 | 1.000000 | 3.08028e-16 | 1.000000 |
| rad27          | 1.34945e-16 | 1.000000 | 1.34945e-16 | 1.000000 |
| rad14          | 1.01264e-16 | 1.000000 | 1.01264e-16 | 1.000000 |
| rad33          | 4.22089e-18 | 1.000000 | 4.22089e-18 | 1.000000 |
| rad25          | 1.04882e-18 | 1.000000 | 1.04882e-18 | 1.000000 |
| rad24          | 9.22611e-19 | 1.000000 | 9.22611e-19 | 1.000000 |
| rad21          | 2.59031e-19 | 1.000000 | 2.59031e-19 | 1.000000 |
| rad20          | 2.26948e-19 | 1.000000 | 2.26948e-19 | 1.000000 |
| rad47          | 1.30834e-19 | 1.000000 | 1.30834e-19 | 1.000000 |
| rad18          | 2.88283e-20 | 1.000000 | 2.88283e-20 | 1.000000 |
| rad5           | 6.05255e-21 | 1.000000 | 6.05255e-21 | 1.000000 |
| rad8           | 2.45492e-28 | 1.000000 | 2.45492e-28 | 1.000000 |

1.00000000 Pa, 700.000000 K

=====

| Rate constant             | True (fraction)        | Effective (fraction)   |
|---------------------------|------------------------|------------------------|
| Total                     | 6.91694e-13 (1.00 )    | 6.91694e-13 (1.00 )    |
| Formation of rad19        | 6.47922e-13 (0.937 )   | 6.47922e-13 (0.937 )   |
| H-abstraction to cyc2enyl | 3.91858e-14 (0.0567 )  | 3.91858e-14 (0.0567 )  |
| H-abstraction to cyclenyl | 4.58543e-15 (0.00663 ) | 4.58542e-15 (0.00663 ) |

| species                       | PYtrue      | Cumul    | PYeffective | Cumul    |
|-------------------------------|-------------|----------|-------------|----------|
| Indene+H                      | 0.928259    | 0.928259 | 0.928259    | 0.928259 |
| Benzene+cycloprop-2-enylidene | 0.0566520   | 0.984911 | 0.0566520   | 0.984911 |
| PhCHCCH2+H                    | 0.00760011  | 0.992511 | 0.00760012  | 0.992511 |
| Benzene+cycloprop-1-enylidene | 0.00662927  | 0.999141 | 0.00662927  | 0.999141 |
| C2H2+PhCH2                    | 0.000223417 | 0.999364 | 0.000223417 | 0.999364 |
| Ph+MeAc                       | 0.000184815 | 0.999549 | 0.000184815 | 0.999549 |
| PhCCH+CH3                     | 0.000114489 | 0.999663 | 0.000114489 | 0.999663 |
| PhCCCH3+H                     | 0.000114199 | 0.999778 | 0.000114199 | 0.999778 |
| Ph+Allene                     | 9.86777e-05 | 0.999876 | 9.86777e-05 | 0.999876 |
| rad67                         | 5.61792e-05 | 0.999932 | 5.61792e-05 | 0.999932 |
| PhCH2CCH+H                    | 3.37516e-05 | 0.999966 | 3.37516e-05 | 0.999966 |
| rad35                         | 2.09265e-05 | 0.999987 | 2.09265e-05 | 0.999987 |
| PAH7+H                        | 5.25112e-06 | 0.999992 | 5.25112e-06 | 0.999992 |
| rad37                         | 2.31871e-06 | 0.999995 | 2.31871e-06 | 0.999995 |
| PhcycC3H3_A+H                 | 1.84815e-06 | 0.999996 | 1.84816e-06 | 0.999996 |
| rad39                         | 1.15824e-06 | 0.999998 | 1.15824e-06 | 0.999998 |
| PhcycC3H3_B+H                 | 5.99448e-07 | 0.999998 | 5.99448e-07 | 0.999998 |
| rad30                         | 5.35370e-07 | 0.999999 | 5.35370e-07 | 0.999999 |
| PAH10+CH3                     | 3.94051e-07 | 0.999999 | 3.94051e-07 | 0.999999 |
| rad9                          | 2.56261e-07 | 0.999999 | 2.56261e-07 | 0.999999 |
| Phenyl+cycC3H4                | 2.47276e-07 | 1.000000 | 0.000000    | 0.999999 |
| PAH9+H                        | 2.20826e-07 | 1.000000 | 2.20826e-07 | 1.000000 |
| rad38                         | 1.79539e-07 | 1.000000 | 1.79539e-07 | 1.000000 |
| PAH3+H                        | 5.99459e-08 | 1.000000 | 5.99459e-08 | 1.000000 |
| rad46                         | 1.59750e-08 | 1.000000 | 1.59750e-08 | 1.000000 |
| rad60syn                      | 1.57297e-08 | 1.000000 | 1.57297e-08 | 1.000000 |
| rad54                         | 1.12029e-08 | 1.000000 | 1.12029e-08 | 1.000000 |
| rad60anti                     | 9.01083e-09 | 1.000000 | 9.01083e-09 | 1.000000 |
| rad59                         | 7.88793e-09 | 1.000000 | 7.88793e-09 | 1.000000 |
| rad43                         | 3.46249e-09 | 1.000000 | 3.46249e-09 | 1.000000 |
| rad50                         | 2.47237e-09 | 1.000000 | 2.47237e-09 | 1.000000 |
| PAH1+H                        | 2.46454e-09 | 1.000000 | 2.46454e-09 | 1.000000 |
| rad70                         | 1.35092e-09 | 1.000000 | 1.35092e-09 | 1.000000 |
| rad6                          | 1.05980e-09 | 1.000000 | 1.05980e-09 | 1.000000 |
| rad23                         | 7.04943e-10 | 1.000000 | 7.04943e-10 | 1.000000 |
| rad19anti                     | 6.96574e-10 | 1.000000 | 6.96574e-10 | 1.000000 |
| rad62                         | 5.31462e-10 | 1.000000 | 5.31462e-10 | 1.000000 |
| rad55                         | 4.95602e-10 | 1.000000 | 4.95602e-10 | 1.000000 |
| rad2                          | 4.10303e-10 | 1.000000 | 4.10304e-10 | 1.000000 |
| rad51                         | 1.79836e-10 | 1.000000 | 1.79837e-10 | 1.000000 |
| rad34                         | 1.70803e-10 | 1.000000 | 1.70803e-10 | 1.000000 |
| rad58                         | 1.15835e-10 | 1.000000 | 1.15835e-10 | 1.000000 |
| rad15                         | 1.14613e-10 | 1.000000 | 1.14613e-10 | 1.000000 |
| rad45                         | 1.07987e-10 | 1.000000 | 1.07987e-10 | 1.000000 |
| rad52                         | 1.07652e-10 | 1.000000 | 1.07652e-10 | 1.000000 |
| rad1                          | 8.01022e-11 | 1.000000 | 8.01023e-11 | 1.000000 |
| rad41                         | 4.34775e-11 | 1.000000 | 4.34775e-11 | 1.000000 |
| rad61                         | 2.96183e-11 | 1.000000 | 2.96183e-11 | 1.000000 |
| rad53                         | 1.84409e-11 | 1.000000 | 1.84409e-11 | 1.000000 |
| rad12                         | 1.22295e-11 | 1.000000 | 1.22295e-11 | 1.000000 |
| rad36                         | 1.11187e-11 | 1.000000 | 1.11187e-11 | 1.000000 |
| rad10                         | 9.63041e-12 | 1.000000 | 9.63041e-12 | 1.000000 |
| rad42                         | 9.23888e-12 | 1.000000 | 9.23889e-12 | 1.000000 |
| rad19syn                      | 8.87889e-12 | 1.000000 | 8.87889e-12 | 1.000000 |
| rad26                         | 8.62090e-12 | 1.000000 | 8.62090e-12 | 1.000000 |
| rad64                         | 7.71097e-12 | 1.000000 | 7.71097e-12 | 1.000000 |
| rad56                         | 6.17559e-12 | 1.000000 | 6.17560e-12 | 1.000000 |
| rad65                         | 5.75646e-12 | 1.000000 | 5.75646e-12 | 1.000000 |
| rad3                          | 4.63324e-12 | 1.000000 | 4.63324e-12 | 1.000000 |
| rad4                          | 3.34051e-12 | 1.000000 | 3.34051e-12 | 1.000000 |
| rad68syn                      | 1.02997e-12 | 1.000000 | 1.02997e-12 | 1.000000 |
| PAH8+H                        | 7.86559e-13 | 1.000000 | 7.86559e-13 | 1.000000 |
| rad28                         | 7.14759e-13 | 1.000000 | 7.14759e-13 | 1.000000 |
| rad68anti                     | 6.93962e-13 | 1.000000 | 6.93962e-13 | 1.000000 |
| rad22                         | 3.34587e-13 | 1.000000 | 3.34587e-13 | 1.000000 |
| rad40syn                      | 2.77296e-13 | 1.000000 | 2.77296e-13 | 1.000000 |
| rad71                         | 2.55903e-13 | 1.000000 | 2.55904e-13 | 1.000000 |
| rad73                         | 2.42420e-13 | 1.000000 | 2.42420e-13 | 1.000000 |

|           |             |         |             |          |
|-----------|-------------|---------|-------------|----------|
| rad40anti | 2.03925e-13 | 1.00000 | 2.03925e-13 | 1.000000 |
| rad7      | 1.79157e-13 | 1.00000 | 1.79157e-13 | 1.000000 |
| rad11     | 5.90478e-14 | 1.00000 | 5.90478e-14 | 1.000000 |
| rad31     | 9.71640e-15 | 1.00000 | 9.71640e-15 | 1.000000 |
| rad72     | 7.22198e-15 | 1.00000 | 7.22199e-15 | 1.000000 |
| rad13     | 1.66163e-15 | 1.00000 | 1.66163e-15 | 1.000000 |
| rad27     | 3.18236e-16 | 1.00000 | 3.18236e-16 | 1.000000 |
| rad14     | 2.18022e-16 | 1.00000 | 2.18022e-16 | 1.000000 |
| rad24     | 2.86680e-17 | 1.00000 | 2.86680e-17 | 1.000000 |
| rad33     | 1.29470e-17 | 1.00000 | 1.29470e-17 | 1.000000 |
| rad21     | 6.85919e-18 | 1.00000 | 6.85919e-18 | 1.000000 |
| rad20     | 3.22666e-18 | 1.00000 | 3.22666e-18 | 1.000000 |
| rad25     | 1.86775e-18 | 1.00000 | 1.86775e-18 | 1.000000 |
| rad47     | 1.32297e-18 | 1.00000 | 1.32297e-18 | 1.000000 |
| rad18     | 1.76179e-19 | 1.00000 | 1.76179e-19 | 1.000000 |
| rad5      | 1.10269e-20 | 1.00000 | 1.10269e-20 | 1.000000 |
| rad8      | 5.41769e-23 | 1.00000 | 5.41769e-23 | 1.000000 |

1.00000000 Pa, 800.000000 K

| Rate constant             | True (fraction)       | Effective (fraction)  |
|---------------------------|-----------------------|-----------------------|
| Total                     | 1.03759e-12 (1.00 )   | 1.03758e-12 (1.00 )   |
| Formation of rad19        | 9.41065e-13 (0.907 )  | 9.41063e-13 (0.907 )  |
| H-abstraction to cyc2enyl | 8.32953e-14 (0.0803 ) | 8.32953e-14 (0.0803 ) |
| H-abstraction to cyclenyl | 1.32261e-14 (0.0127 ) | 1.32261e-14 (0.0127 ) |

| species                       | PYtrue      | Cumul    | PYeffective | Cumul    |
|-------------------------------|-------------|----------|-------------|----------|
| Indene+H                      | 0.891842    | 0.891842 | 0.891843    | 0.891843 |
| Benzene+cycloprop-2-enylidene | 0.0802780   | 0.972120 | 0.0802781   | 0.972121 |
| PhCHCCH2+H                    | 0.0134678   | 0.985588 | 0.0134678   | 0.985589 |
| Benzene+cycloprop-1-enylidene | 0.0127470   | 0.998335 | 0.0127470   | 0.998336 |
| C2H2+PhCH2                    | 0.000407275 | 0.998742 | 0.000407276 | 0.998743 |
| Ph+MeAc                       | 0.000361325 | 0.999103 | 0.000361325 | 0.999104 |
| Ph+Allene                     | 0.000232499 | 0.999336 | 0.000232499 | 0.999337 |
| PhCCCH3+H                     | 0.000204052 | 0.999540 | 0.000204053 | 0.999541 |
| PhCCH+CH3                     | 0.000180599 | 0.999721 | 0.000180599 | 0.999722 |
| rad67                         | 0.000113240 | 0.999834 | 0.000113240 | 0.999835 |
| PhCH2CCH+H                    | 8.78776e-05 | 0.999922 | 8.78778e-05 | 0.999923 |
| rad35                         | 4.16367e-05 | 0.999963 | 4.16367e-05 | 0.999964 |
| PAH7+H                        | 1.05847e-05 | 0.999974 | 1.05847e-05 | 0.999975 |
| PhcycC3H3_A+H                 | 7.41613e-06 | 0.999981 | 7.41613e-06 | 0.999982 |
| rad37                         | 5.47112e-06 | 0.999987 | 5.47112e-06 | 0.999988 |
| PhcycC3H3_B+H                 | 3.06510e-06 | 0.999990 | 3.06510e-06 | 0.999991 |
| rad9                          | 2.34971e-06 | 0.999992 | 2.34971e-06 | 0.999993 |
| rad39                         | 2.23509e-06 | 0.999995 | 2.23510e-06 | 0.999995 |
| PAH10+CH3                     | 1.45710e-06 | 0.999996 | 1.45710e-06 | 0.999997 |
| Phenyl+cycC3H4                | 1.26414e-06 | 0.999997 | 0.00000     | 0.999997 |
| rad30                         | 1.15015e-06 | 0.999998 | 1.15016e-06 | 0.999998 |
| PAH9+H                        | 6.07521e-07 | 0.999999 | 6.07522e-07 | 0.999999 |
| rad38                         | 5.32255e-07 | 1.000000 | 5.32256e-07 | 0.999999 |
| PAH3+H                        | 2.07025e-07 | 1.000000 | 2.07025e-07 | 0.999999 |
| rad46                         | 5.05527e-08 | 1.000000 | 5.05528e-08 | 0.999999 |
| rad60syn                      | 4.30690e-08 | 1.000000 | 4.30690e-08 | 0.999999 |
| rad54                         | 3.73174e-08 | 1.000000 | 3.73174e-08 | 1.000000 |
| rad59                         | 2.58532e-08 | 1.000000 | 2.58533e-08 | 1.000000 |
| rad60anti                     | 2.50962e-08 | 1.000000 | 2.50962e-08 | 1.000000 |
| PAH1+H                        | 1.11525e-08 | 1.000000 | 1.11525e-08 | 1.000000 |
| rad50                         | 1.09754e-08 | 1.000000 | 1.09754e-08 | 1.000000 |
| rad43                         | 1.08442e-08 | 1.000000 | 1.08442e-08 | 1.000000 |
| rad70                         | 5.29102e-09 | 1.000000 | 5.29102e-09 | 1.000000 |
| rad55                         | 1.83523e-09 | 1.000000 | 1.83523e-09 | 1.000000 |
| rad62                         | 1.47123e-09 | 1.000000 | 1.47123e-09 | 1.000000 |
| rad51                         | 1.05332e-09 | 1.000000 | 1.05333e-09 | 1.000000 |
| rad23                         | 9.54265e-10 | 1.000000 | 9.54265e-10 | 1.000000 |
| rad6                          | 8.67686e-10 | 1.000000 | 8.67687e-10 | 1.000000 |
| rad34                         | 7.66773e-10 | 1.000000 | 7.66774e-10 | 1.000000 |
| rad12                         | 6.69868e-10 | 1.000000 | 6.69869e-10 | 1.000000 |
| rad15                         | 6.65002e-10 | 1.000000 | 6.65003e-10 | 1.000000 |
| rad19anti                     | 6.03179e-10 | 1.000000 | 6.03180e-10 | 1.000000 |
| rad58                         | 5.69216e-10 | 1.000000 | 5.69217e-10 | 1.000000 |
| rad52                         | 5.51754e-10 | 1.000000 | 5.51755e-10 | 1.000000 |
| rad2                          | 4.24570e-10 | 1.000000 | 4.24571e-10 | 1.000000 |
| rad61                         | 2.11333e-10 | 1.000000 | 2.11334e-10 | 1.000000 |
| rad41                         | 1.95382e-10 | 1.000000 | 1.95382e-10 | 1.000000 |
| rad45                         | 1.76559e-10 | 1.000000 | 1.76559e-10 | 1.000000 |
| rad53                         | 1.01993e-10 | 1.000000 | 1.01993e-10 | 1.000000 |
| rad1                          | 1.00710e-10 | 1.000000 | 1.00710e-10 | 1.000000 |
| rad56                         | 4.35657e-11 | 1.000000 | 4.35658e-11 | 1.000000 |

|           |             |          |             |          |
|-----------|-------------|----------|-------------|----------|
| rad64     | 4.03234e-11 | 1.000000 | 4.03235e-11 | 1.000000 |
| rad42     | 3.45615e-11 | 1.000000 | 3.45615e-11 | 1.000000 |
| rad65     | 3.34821e-11 | 1.000000 | 3.34821e-11 | 1.000000 |
| rad36     | 1.88781e-11 | 1.000000 | 1.88780e-11 | 1.000000 |
| rad19syn  | 1.44428e-11 | 1.000000 | 1.44428e-11 | 1.000000 |
| rad10     | 9.74336e-12 | 1.000000 | 9.74336e-12 | 1.000000 |
| PAH8+H    | 8.49330e-12 | 1.000000 | 8.49332e-12 | 1.000000 |
| rad68syn  | 7.77297e-12 | 1.000000 | 7.77297e-12 | 1.000000 |
| rad26     | 7.52314e-12 | 1.000000 | 7.52315e-12 | 1.000000 |
| rad68anti | 5.20085e-12 | 1.000000 | 5.20085e-12 | 1.000000 |
| rad3      | 4.44062e-12 | 1.000000 | 4.44063e-12 | 1.000000 |
| rad4      | 3.42177e-12 | 1.000000 | 3.42177e-12 | 1.000000 |
| rad40syn  | 2.55399e-12 | 1.000000 | 2.55399e-12 | 1.000000 |
| rad40anti | 1.89233e-12 | 1.000000 | 1.89233e-12 | 1.000000 |
| rad73     | 1.79331e-12 | 1.000000 | 1.79332e-12 | 1.000000 |
| rad71     | 1.53137e-12 | 1.000000 | 1.53137e-12 | 1.000000 |
| rad28     | 5.73430e-13 | 1.000000 | 5.73429e-13 | 1.000000 |
| rad22     | 4.64950e-13 | 1.000000 | 4.64951e-13 | 1.000000 |
| rad7      | 1.82346e-13 | 1.000000 | 1.82345e-13 | 1.000000 |
| rad11     | 6.93324e-14 | 1.000000 | 6.93325e-14 | 1.000000 |
| rad72     | 3.17655e-14 | 1.000000 | 3.17655e-14 | 1.000000 |
| rad31     | 1.51065e-14 | 1.000000 | 1.51066e-14 | 1.000000 |
| rad24     | 4.07634e-15 | 1.000000 | 4.07634e-15 | 1.000000 |
| rad13     | 3.09143e-15 | 1.000000 | 3.09144e-15 | 1.000000 |
| rad21     | 1.44906e-15 | 1.000000 | 1.44906e-15 | 1.000000 |
| rad27     | 5.17107e-16 | 1.000000 | 5.17108e-16 | 1.000000 |
| rad20     | 3.21683e-16 | 1.000000 | 3.21683e-16 | 1.000000 |
| rad14     | 2.98214e-16 | 1.000000 | 2.98214e-16 | 1.000000 |
| rad33     | 2.85388e-16 | 1.000000 | 2.85389e-16 | 1.000000 |
| rad47     | 8.83359e-18 | 1.000000 | 8.83360e-18 | 1.000000 |
| rad25     | 7.46240e-18 | 1.000000 | 7.46241e-18 | 1.000000 |
| rad18     | 4.28321e-18 | 1.000000 | 4.28322e-18 | 1.000000 |
| rad8      | 2.41809e-18 | 1.000000 | 2.41809e-18 | 1.000000 |
| rad5      | 1.56139e-20 | 1.000000 | 1.56139e-20 | 1.000000 |

1.00000000 Pa, 900.000000 K

=====

| Rate constant             | True (fraction)       | Effective (fraction)  |
|---------------------------|-----------------------|-----------------------|
| Total                     | 1.49199e-12 (1.00 )   | 1.49199e-12 (1.00 )   |
| Formation of rad19        | 1.30395e-12 (0.874 )  | 1.30394e-12 (0.874 )  |
| H-abstraction to cyc2enyl | 1.56554e-13 (0.105 )  | 1.56554e-13 (0.105 )  |
| H-abstraction to cyc1enyl | 3.14892e-14 (0.0211 ) | 3.14890e-14 (0.0211 ) |

| species                       | PYtrue      | Cumul    | PYeffective | Cumul    |
|-------------------------------|-------------|----------|-------------|----------|
| Indene+H                      | 0.848675    | 0.848675 | 0.848680    | 0.848680 |
| Benzene+cycloprop-2-enylidene | 0.104929    | 0.953605 | 0.104930    | 0.953610 |
| PhCHCCH2+H                    | 0.0223082   | 0.975913 | 0.0223084   | 0.975918 |
| Benzene+cycloprop-1-enylidene | 0.0211054   | 0.997018 | 0.0211054   | 0.997024 |
| C2H2+PhCH2                    | 0.000684338 | 0.997703 | 0.000684341 | 0.997708 |
| Ph+MeAc                       | 0.000643907 | 0.998347 | 0.000643911 | 0.998352 |
| Ph+Allene                     | 0.000474680 | 0.998821 | 0.000474682 | 0.998827 |
| PhCCCH3+H                     | 0.000337351 | 0.999159 | 0.000337353 | 0.999164 |
| PhCCH+CH3                     | 0.000266946 | 0.999426 | 0.000266947 | 0.999431 |
| rad67                         | 0.000208444 | 0.999634 | 0.000208445 | 0.999639 |
| PhCH2CCH+H                    | 0.000196888 | 0.999831 | 0.000196888 | 0.999836 |
| rad35                         | 7.59421e-05 | 0.999907 | 7.59425e-05 | 0.999912 |
| PhcycC3H3_A+H                 | 2.42300e-05 | 0.999931 | 2.42301e-05 | 0.999936 |
| PAH7+H                        | 1.88498e-05 | 0.999950 | 1.88498e-05 | 0.999955 |
| PhcycC3H3_B+H                 | 1.21757e-05 | 0.999962 | 1.21758e-05 | 0.999967 |
| rad37                         | 1.14190e-05 | 0.999973 | 1.14190e-05 | 0.999979 |
| rad9                          | 6.69490e-06 | 0.999980 | 6.69493e-06 | 0.999986 |
| Phenyl+cycC3H4                | 5.07996e-06 | 0.999985 | 0.000000    | 0.999986 |
| PAH10+CH3                     | 4.42487e-06 | 0.999990 | 4.42489e-06 | 0.999990 |
| rad39                         | 3.80086e-06 | 0.999993 | 3.80087e-06 | 0.999994 |
| rad30                         | 2.25445e-06 | 0.999996 | 2.25446e-06 | 0.999996 |
| PAH9+H                        | 1.49429e-06 | 0.999997 | 1.49430e-06 | 0.999998 |
| rad38                         | 1.36968e-06 | 0.999999 | 1.36969e-06 | 0.999999 |
| PAH3+H                        | 6.09642e-07 | 0.999999 | 6.09646e-07 | 1.000000 |
| rad46                         | 1.40337e-07 | 0.999999 | 1.40338e-07 | 1.000000 |
| rad60syn                      | 1.04068e-07 | 0.999999 | 1.04069e-07 | 1.000000 |
| rad54                         | 1.00912e-07 | 1.000000 | 1.00912e-07 | 1.000000 |
| rad59                         | 7.25935e-08 | 1.000000 | 7.25938e-08 | 1.000000 |
| rad60anti                     | 6.15197e-08 | 1.000000 | 6.15200e-08 | 1.000000 |
| rad50                         | 4.08461e-08 | 1.000000 | 4.08463e-08 | 1.000000 |
| PAH1+H                        | 3.98192e-08 | 1.000000 | 3.98194e-08 | 1.000000 |
| rad43                         | 2.87996e-08 | 1.000000 | 2.87998e-08 | 1.000000 |
| rad70                         | 1.66295e-08 | 1.000000 | 1.66296e-08 | 1.000000 |
| rad55                         | 5.40437e-09 | 1.000000 | 5.40440e-09 | 1.000000 |

|           |             |          |             |         |
|-----------|-------------|----------|-------------|---------|
| rad51     | 4.99130e-09 | 1.000000 | 4.99133e-09 | 1.00000 |
| rad12     | 4.06289e-09 | 1.000000 | 4.06291e-09 | 1.00000 |
| rad62     | 3.45304e-09 | 1.000000 | 3.45305e-09 | 1.00000 |
| rad34     | 2.70069e-09 | 1.000000 | 2.70071e-09 | 1.00000 |
| rad52     | 2.31828e-09 | 1.000000 | 2.31830e-09 | 1.00000 |
| rad58     | 2.23827e-09 | 1.000000 | 2.23828e-09 | 1.00000 |
| rad15     | 1.59770e-09 | 1.000000 | 1.59770e-09 | 1.00000 |
| rad61     | 1.09067e-09 | 1.000000 | 1.09068e-09 | 1.00000 |
| rad23     | 9.55122e-10 | 1.000000 | 9.55130e-10 | 1.00000 |
| rad41     | 6.97643e-10 | 1.000000 | 6.97646e-10 | 1.00000 |
| rad6      | 5.31135e-10 | 1.000000 | 5.31137e-10 | 1.00000 |
| rad19anti | 4.57670e-10 | 1.000000 | 4.57673e-10 | 1.00000 |
| rad53     | 4.16796e-10 | 1.000000 | 4.16798e-10 | 1.00000 |
| rad2      | 3.23377e-10 | 1.000000 | 3.23378e-10 | 1.00000 |
| rad56     | 2.16402e-10 | 1.000000 | 2.16403e-10 | 1.00000 |
| rad45     | 2.16252e-10 | 1.000000 | 2.16254e-10 | 1.00000 |
| rad65     | 1.56529e-10 | 1.000000 | 1.56530e-10 | 1.00000 |
| rad64     | 1.56380e-10 | 1.000000 | 1.56381e-10 | 1.00000 |
| rad42     | 1.03852e-10 | 1.000000 | 1.03853e-10 | 1.00000 |
| rad1      | 8.54616e-11 | 1.000000 | 8.54621e-11 | 1.00000 |
| PAH8+H    | 6.60261e-11 | 1.000000 | 6.60265e-11 | 1.00000 |
| rad68syn  | 4.21651e-11 | 1.000000 | 4.21653e-11 | 1.00000 |
| rad68anti | 2.80409e-11 | 1.000000 | 2.80411e-11 | 1.00000 |
| rad36     | 2.26624e-11 | 1.000000 | 2.26626e-11 | 1.00000 |
| rad40syn  | 1.67661e-11 | 1.000000 | 1.67663e-11 | 1.00000 |
| rad73     | 1.52322e-11 | 1.000000 | 1.52322e-11 | 1.00000 |
| rad19syn  | 1.51735e-11 | 1.000000 | 1.51736e-11 | 1.00000 |
| rad71     | 1.36307e-11 | 1.000000 | 1.36308e-11 | 1.00000 |
| rad40anti | 1.25854e-11 | 1.000000 | 1.25854e-11 | 1.00000 |
| rad10     | 8.35403e-12 | 1.000000 | 8.35408e-12 | 1.00000 |
| rad26     | 4.77145e-12 | 1.000000 | 4.77148e-12 | 1.00000 |
| rad3      | 3.24495e-12 | 1.000000 | 3.24496e-12 | 1.00000 |
| rad4      | 2.59775e-12 | 1.000000 | 2.59776e-12 | 1.00000 |
| rad22     | 5.05795e-13 | 1.000000 | 5.05798e-13 | 1.00000 |
| rad28     | 3.57351e-13 | 1.000000 | 3.57353e-13 | 1.00000 |
| rad72     | 2.56836e-13 | 1.000000 | 2.56837e-13 | 1.00000 |
| rad7      | 1.58772e-13 | 1.000000 | 1.58773e-13 | 1.00000 |
| rad21     | 1.27468e-13 | 1.000000 | 1.27469e-13 | 1.00000 |
| rad24     | 8.13735e-14 | 1.000000 | 8.13740e-14 | 1.00000 |
| rad11     | 7.42725e-14 | 1.000000 | 7.42729e-14 | 1.00000 |
| rad20     | 2.83664e-14 | 1.000000 | 2.83665e-14 | 1.00000 |
| rad31     | 1.88506e-14 | 1.000000 | 1.88508e-14 | 1.00000 |
| rad33     | 1.66177e-14 | 1.000000 | 1.66178e-14 | 1.00000 |
| rad13     | 9.75983e-15 | 1.000000 | 9.75991e-15 | 1.00000 |
| rad8      | 5.49695e-15 | 1.000000 | 5.49697e-15 | 1.00000 |
| rad27     | 8.69528e-16 | 1.000000 | 8.69533e-16 | 1.00000 |
| rad14     | 3.45603e-16 | 1.000000 | 3.45605e-16 | 1.00000 |
| rad18     | 2.76918e-16 | 1.000000 | 2.76918e-16 | 1.00000 |
| rad25     | 2.59776e-16 | 1.000000 | 2.59777e-16 | 1.00000 |
| rad47     | 4.41840e-17 | 1.000000 | 4.41842e-17 | 1.00000 |
| rad5      | 1.79286e-20 | 1.000000 | 1.79287e-20 | 1.00000 |

1.00000000 Pa, 1000.00000 K

=====

| Rate constant             | True (fraction)       | Effective (fraction)  |
|---------------------------|-----------------------|-----------------------|
| Total                     | 2.07591e-12 (1.00 )   | 2.07587e-12 (1.00 )   |
| Formation of rad19        | 1.74189e-12 (0.839 )  | 1.74186e-12 (0.839 )  |
| H-abstraction to cyc2enyl | 2.68753e-13 (0.129 )  | 2.68753e-13 (0.129 )  |
| H-abstraction to cyclenyl | 6.52627e-14 (0.0314 ) | 6.52614e-14 (0.0314 ) |

| species                       | PYtrue      | Cumul    | PYeffective | Cumul    |
|-------------------------------|-------------|----------|-------------|----------|
| Indene+H                      | 0.799550    | 0.799550 | 0.799564    | 0.799564 |
| Benzene+cycloprop-2-enylidene | 0.129463    | 0.929013 | 0.129465    | 0.929030 |
| PhCHCCH2+H                    | 0.0345934   | 0.963607 | 0.0345940   | 0.963624 |
| Benzene+cycloprop-1-enylidene | 0.0314382   | 0.995045 | 0.0314381   | 0.995062 |
| C2H2+PhCH2                    | 0.00107083  | 0.996116 | 0.00107086  | 0.996133 |
| Ph+MeAc                       | 0.00105430  | 0.997170 | 0.00105432  | 0.997187 |
| Ph+Allene                     | 0.000856888 | 0.998027 | 0.000856902 | 0.998044 |
| PhCCCH3+H                     | 0.000518658 | 0.998546 | 0.000518667 | 0.998562 |
| PhCH2CCH+H                    | 0.000387909 | 0.998934 | 0.000387916 | 0.998950 |
| PhCCH+CH3                     | 0.000373584 | 0.999307 | 0.000373591 | 0.999324 |
| rad67                         | 0.000352453 | 0.999660 | 0.000352460 | 0.999676 |
| rad35                         | 0.000127614 | 0.999787 | 0.000127617 | 0.999804 |
| PhcycC3H3_A+H                 | 6.69274e-05 | 0.999854 | 6.69285e-05 | 0.999871 |
| PhcycC3H3_B+H                 | 3.94815e-05 | 0.999894 | 3.94823e-05 | 0.999910 |
| PAH7+H                        | 3.02248e-05 | 0.999924 | 3.02253e-05 | 0.999941 |
| rad37                         | 2.12783e-05 | 0.999945 | 2.12786e-05 | 0.999962 |
| Phenyl+cycC3H4                | 1.68078e-05 | 0.999962 | 0.00000     | 0.999962 |



|           |             |          |             |          |
|-----------|-------------|----------|-------------|----------|
| PAH10+CH3 | 1.12885e-05 | 0.999973 | 1.12887e-05 | 0.999973 |
| rad9      | 7.16678e-06 | 0.999980 | 7.16691e-06 | 0.999980 |
| rad39     | 5.81314e-06 | 0.999986 | 5.81324e-06 | 0.999986 |
| rad30     | 4.04887e-06 | 0.999990 | 4.04894e-06 | 0.999990 |
| PAH9+H    | 3.30574e-06 | 0.999994 | 3.30580e-06 | 0.999994 |
| rad38     | 3.09217e-06 | 0.999997 | 3.09222e-06 | 0.999997 |
| PAH3+H    | 1.54909e-06 | 0.999998 | 1.54911e-06 | 0.999998 |
| rad46     | 3.44218e-07 | 0.999999 | 3.44224e-07 | 0.999999 |
| rad54     | 2.28963e-07 | 0.999999 | 2.28968e-07 | 0.999999 |
| rad60syn  | 2.23761e-07 | 0.999999 | 2.23764e-07 | 0.999999 |
| rad59     | 1.76849e-07 | 0.999999 | 1.76852e-07 | 0.999999 |
| rad60anti | 1.33891e-07 | 0.999999 | 1.33893e-07 | 0.999999 |
| rad50     | 1.27911e-07 | 0.999999 | 1.27914e-07 | 0.999999 |
| PAH1+H    | 1.16017e-07 | 1.000000 | 1.16019e-07 | 1.000000 |
| rad43     | 6.61896e-08 | 1.000000 | 6.61907e-08 | 1.000000 |
| rad70     | 4.34191e-08 | 1.000000 | 4.34198e-08 | 1.000000 |
| rad51     | 1.88586e-08 | 1.000000 | 1.88589e-08 | 1.000000 |
| rad55     | 1.31473e-08 | 1.000000 | 1.31476e-08 | 1.000000 |
| rad52     | 7.98004e-09 | 1.000000 | 7.98018e-09 | 1.000000 |
| rad34     | 7.74683e-09 | 1.000000 | 7.74696e-09 | 1.000000 |
| rad12     | 7.28919e-09 | 1.000000 | 7.28932e-09 | 1.000000 |
| rad58     | 7.16239e-09 | 1.000000 | 7.16251e-09 | 1.000000 |
| rad62     | 7.05175e-09 | 1.000000 | 7.05187e-09 | 1.000000 |
| rad61     | 4.20456e-09 | 1.000000 | 4.20464e-09 | 1.000000 |
| rad41     | 2.04093e-09 | 1.000000 | 2.04097e-09 | 1.000000 |
| rad15     | 2.00232e-09 | 1.000000 | 2.00236e-09 | 1.000000 |
| rad53     | 1.32450e-09 | 1.000000 | 1.32453e-09 | 1.000000 |
| rad23     | 9.09289e-10 | 1.000000 | 9.09304e-10 | 1.000000 |
| rad56     | 7.99440e-10 | 1.000000 | 7.99454e-10 | 1.000000 |
| rad65     | 5.83426e-10 | 1.000000 | 5.83436e-10 | 1.000000 |
| rad64     | 4.75782e-10 | 1.000000 | 4.75790e-10 | 1.000000 |
| rad19anti | 3.42148e-10 | 1.000000 | 3.42155e-10 | 1.000000 |
| PAH8+H    | 3.33929e-10 | 1.000000 | 3.33934e-10 | 1.000000 |
| rad6      | 3.23019e-10 | 1.000000 | 3.23024e-10 | 1.000000 |
| rad42     | 2.60293e-10 | 1.000000 | 2.60298e-10 | 1.000000 |
| rad2      | 2.42194e-10 | 1.000000 | 2.42199e-10 | 1.000000 |
| rad45     | 2.36774e-10 | 1.000000 | 2.36778e-10 | 1.000000 |
| rad68syn  | 1.68750e-10 | 1.000000 | 1.68753e-10 | 1.000000 |
| rad68anti | 1.11728e-10 | 1.000000 | 1.11730e-10 | 1.000000 |
| rad73     | 8.42698e-11 | 1.000000 | 8.42713e-11 | 1.000000 |
| rad71     | 7.67378e-11 | 1.000000 | 7.67392e-11 | 1.000000 |
| rad40syn  | 7.67012e-11 | 1.000000 | 7.67025e-11 | 1.000000 |
| rad1      | 6.72434e-11 | 1.000000 | 6.72445e-11 | 1.000000 |
| rad40anti | 5.81304e-11 | 1.000000 | 5.81314e-11 | 1.000000 |
| rad36     | 2.41869e-11 | 1.000000 | 2.41874e-11 | 1.000000 |
| rad19syn  | 1.42443e-11 | 1.000000 | 1.42446e-11 | 1.000000 |
| rad10     | 8.12339e-12 | 1.000000 | 8.12354e-12 | 1.000000 |
| rad26     | 3.09566e-12 | 1.000000 | 3.09571e-12 | 1.000000 |
| rad3      | 2.33665e-12 | 1.000000 | 2.33669e-12 | 1.000000 |
| rad21     | 2.14381e-12 | 1.000000 | 2.14385e-12 | 1.000000 |
| rad4      | 1.89197e-12 | 1.000000 | 1.89201e-12 | 1.000000 |
| rad72     | 1.28761e-12 | 1.000000 | 1.28764e-12 | 1.000000 |
| rad22     | 7.53181e-13 | 1.000000 | 7.53194e-13 | 1.000000 |
| rad8      | 6.29228e-13 | 1.000000 | 6.29239e-13 | 1.000000 |
| rad20     | 5.37441e-13 | 1.000000 | 5.37451e-13 | 1.000000 |
| rad24     | 3.61596e-13 | 1.000000 | 3.61603e-13 | 1.000000 |
| rad13     | 2.40414e-13 | 1.000000 | 2.40418e-13 | 1.000000 |
| rad33     | 2.31929e-13 | 1.000000 | 2.31933e-13 | 1.000000 |
| rad28     | 2.26672e-13 | 1.000000 | 2.26676e-13 | 1.000000 |
| rad7      | 1.61761e-13 | 1.000000 | 1.61764e-13 | 1.000000 |
| rad11     | 1.15240e-13 | 1.000000 | 1.15242e-13 | 1.000000 |
| rad31     | 2.18595e-14 | 1.000000 | 2.18599e-14 | 1.000000 |
| rad25     | 7.81652e-15 | 1.000000 | 7.81665e-15 | 1.000000 |
| rad27     | 6.42080e-15 | 1.000000 | 6.42091e-15 | 1.000000 |
| rad18     | 4.73561e-15 | 1.000000 | 4.73569e-15 | 1.000000 |
| rad14     | 7.66700e-16 | 1.000000 | 7.66713e-16 | 1.000000 |
| rad47     | 1.70392e-16 | 1.000000 | 1.70395e-16 | 1.000000 |
| rad5      | 2.63991e-20 | 1.000000 | 2.63995e-20 | 1.000000 |

1.00000000 Pa, 1100.00000 K

| Rate constant             | True (fraction)      | Effective (fraction) |
|---------------------------|----------------------|----------------------|
| Total                     | 2.81236e-12 (1.00)   | 2.81222e-12 (1.00)   |
| Formation of rad19        | 2.25993e-12 (0.804)  | 2.25980e-12 (0.804)  |
| H-abstraction to cyc2enyl | 4.30538e-13 (0.153)  | 4.30538e-13 (0.153)  |
| H-abstraction to cyclenyl | 1.21896e-13 (0.0433) | 1.21889e-13 (0.0433) |

  

| species | PYtrue | Cumul | PYeffective | Cumul |
|---------|--------|-------|-------------|-------|
| -----   | -----  | ----- | -----       | ----- |

|                               |             |          |             |          |
|-------------------------------|-------------|----------|-------------|----------|
| Indene+H                      | 0.745429    | 0.745429 | 0.745466    | 0.745466 |
| Benzene+cycloprop-2-enylidene | 0.153088    | 0.898516 | 0.153095    | 0.898562 |
| PhCHCCH2+H                    | 0.0504260   | 0.948942 | 0.0504285   | 0.948990 |
| Benzene+cycloprop-1-enylidene | 0.0433429   | 0.992285 | 0.0433425   | 0.992333 |
| Ph+MeAc                       | 0.00160053  | 0.993886 | 0.00160062  | 0.993933 |
| C2H2+PhCH2                    | 0.00157455  | 0.995460 | 0.00157463  | 0.995508 |
| Ph+Allene                     | 0.00139443  | 0.996855 | 0.00139450  | 0.996902 |
| PhCCCH3+H                     | 0.000746369 | 0.997601 | 0.000746406 | 0.997649 |
| PhCH2CCH+H                    | 0.000685842 | 0.998287 | 0.000685876 | 0.998335 |
| rad67                         | 0.000551773 | 0.998839 | 0.000551800 | 0.998886 |
| PhCCH+CH3                     | 0.000500078 | 0.999339 | 0.000500103 | 0.999387 |
| rad35                         | 0.000199000 | 0.999538 | 0.000199009 | 0.999586 |
| PhcycC3H3_A+H                 | 0.000161039 | 0.999699 | 0.000161047 | 0.999747 |
| PhcycC3H3_B+H                 | 0.000108628 | 0.999808 | 0.000108634 | 0.999855 |
| Phenyl+cycC3H4                | 4.74535e-05 | 0.999855 | 0.000000    | 0.999855 |
| PAH7+H                        | 4.44458e-05 | 0.999899 | 4.44480e-05 | 0.999900 |
| rad37                         | 3.58165e-05 | 0.999935 | 3.58183e-05 | 0.999935 |
| PAH10+CH3                     | 2.48184e-05 | 0.999960 | 2.48196e-05 | 0.999960 |
| rad39                         | 8.15752e-06 | 0.999968 | 8.15792e-06 | 0.999968 |
| rad30                         | 6.70945e-06 | 0.999975 | 6.70979e-06 | 0.999975 |
| PAH9+H                        | 6.63912e-06 | 0.999982 | 6.63946e-06 | 0.999982 |
| rad38                         | 6.21600e-06 | 0.999988 | 6.21631e-06 | 0.999988 |
| rad9                          | 5.26550e-06 | 0.999993 | 5.26577e-06 | 0.999993 |
| PAH3+H                        | 3.45877e-06 | 0.999997 | 3.45895e-06 | 0.999997 |
| rad46                         | 7.55129e-07 | 0.999997 | 7.55167e-07 | 0.999997 |
| rad54                         | 4.49256e-07 | 0.999998 | 4.49278e-07 | 0.999998 |
| rad60syn                      | 4.33279e-07 | 0.999998 | 4.33301e-07 | 0.999998 |
| rad59                         | 3.80373e-07 | 0.999999 | 3.80392e-07 | 0.999999 |
| rad50                         | 3.44691e-07 | 0.999999 | 3.44709e-07 | 0.999999 |
| PAH1+H                        | 2.86048e-07 | 0.999999 | 2.86062e-07 | 0.999999 |
| rad60anti                     | 2.61950e-07 | 0.999999 | 2.61963e-07 | 1.000000 |
| rad43                         | 1.34399e-07 | 1.000000 | 1.34406e-07 | 1.000000 |
| rad70                         | 9.73452e-08 | 1.000000 | 9.73499e-08 | 1.000000 |
| rad51                         | 5.91088e-08 | 1.000000 | 5.91118e-08 | 1.000000 |
| rad55                         | 2.73452e-08 | 1.000000 | 2.73466e-08 | 1.000000 |
| rad52                         | 2.31980e-08 | 1.000000 | 2.31992e-08 | 1.000000 |
| rad58                         | 1.93099e-08 | 1.000000 | 1.93109e-08 | 1.000000 |
| rad34                         | 1.88037e-08 | 1.000000 | 1.88046e-08 | 1.000000 |
| rad61                         | 1.29312e-08 | 1.000000 | 1.29319e-08 | 1.000000 |
| rad62                         | 1.28272e-08 | 1.000000 | 1.28278e-08 | 1.000000 |
| rad12                         | 7.94263e-09 | 1.000000 | 7.94303e-09 | 1.000000 |
| rad41                         | 5.06590e-09 | 1.000000 | 5.06615e-09 | 1.000000 |
| rad53                         | 3.44744e-09 | 1.000000 | 3.44762e-09 | 1.000000 |
| rad56                         | 2.35178e-09 | 1.000000 | 2.35191e-09 | 1.000000 |
| rad15                         | 2.14298e-09 | 1.000000 | 2.14309e-09 | 1.000000 |
| rad65                         | 1.80511e-09 | 1.000000 | 1.80520e-09 | 1.000000 |
| PAH8+H                        | 1.27886e-09 | 1.000000 | 1.27893e-09 | 1.000000 |
| rad64                         | 1.19738e-09 | 1.000000 | 1.19744e-09 | 1.000000 |
| rad23                         | 8.42607e-10 | 1.000000 | 8.42647e-10 | 1.000000 |
| rad42                         | 5.62887e-10 | 1.000000 | 5.62915e-10 | 1.000000 |
| rad68syn                      | 5.36991e-10 | 1.000000 | 5.37018e-10 | 1.000000 |
| rad73                         | 3.54785e-10 | 1.000000 | 3.54802e-10 | 1.000000 |
| rad68anti                     | 3.54276e-10 | 1.000000 | 3.54294e-10 | 1.000000 |
| rad71                         | 3.27331e-10 | 1.000000 | 3.27347e-10 | 1.000000 |
| rad40syn                      | 2.71962e-10 | 1.000000 | 2.71975e-10 | 1.000000 |
| rad19anti                     | 2.56343e-10 | 1.000000 | 2.56356e-10 | 1.000000 |
| rad45                         | 2.40614e-10 | 1.000000 | 2.40625e-10 | 1.000000 |
| rad6                          | 2.28243e-10 | 1.000000 | 2.28254e-10 | 1.000000 |
| rad40anti                     | 2.07905e-10 | 1.000000 | 2.07916e-10 | 1.000000 |
| rad2                          | 1.83341e-10 | 1.000000 | 1.83350e-10 | 1.000000 |
| rad1                          | 5.13942e-11 | 1.000000 | 5.13967e-11 | 1.000000 |
| rad36                         | 2.42946e-11 | 1.000000 | 2.42957e-11 | 1.000000 |
| rad19syn                      | 1.28391e-11 | 1.000000 | 1.28398e-11 | 1.000000 |
| rad21                         | 9.70648e-12 | 1.000000 | 9.70695e-12 | 1.000000 |
| rad10                         | 8.80800e-12 | 1.000000 | 8.80849e-12 | 1.000000 |
| rad8                          | 7.66067e-12 | 1.000000 | 7.66106e-12 | 1.000000 |
| rad72                         | 4.64817e-12 | 1.000000 | 4.64840e-12 | 1.000000 |
| rad13                         | 3.23661e-12 | 1.000000 | 3.23677e-12 | 1.000000 |
| rad20                         | 2.60266e-12 | 1.000000 | 2.60279e-12 | 1.000000 |
| rad26                         | 2.24820e-12 | 1.000000 | 2.24831e-12 | 1.000000 |
| rad3                          | 1.66704e-12 | 1.000000 | 1.66712e-12 | 1.000000 |
| rad22                         | 1.50118e-12 | 1.000000 | 1.50125e-12 | 1.000000 |
| rad4                          | 1.35007e-12 | 1.000000 | 1.35014e-12 | 1.000000 |
| rad11                         | 9.69908e-13 | 1.000000 | 9.69956e-13 | 1.000000 |
| rad33                         | 8.69711e-13 | 1.000000 | 8.69752e-13 | 1.000000 |
| rad24                         | 7.72449e-13 | 1.000000 | 7.72488e-13 | 1.000000 |
| rad7                          | 2.44849e-13 | 1.000000 | 2.44861e-13 | 1.000000 |
| rad28                         | 1.65766e-13 | 1.000000 | 1.65774e-13 | 1.000000 |
| rad25                         | 7.94631e-14 | 1.000000 | 7.94672e-14 | 1.000000 |
| rad27                         | 4.84678e-14 | 1.000000 | 4.84701e-14 | 1.000000 |

|       |             |          |             |          |
|-------|-------------|----------|-------------|----------|
| rad18 | 2.84811e-14 | 1.000000 | 2.84824e-14 | 1.000000 |
| rad31 | 2.41083e-14 | 1.000000 | 2.41095e-14 | 1.000000 |
| rad14 | 4.21712e-15 | 1.000000 | 4.21733e-15 | 1.000000 |
| rad47 | 5.32717e-16 | 1.000000 | 5.32743e-16 | 1.000000 |
| rad5  | 7.09568e-20 | 1.000000 | 7.09603e-20 | 1.000000 |

1.00000000 Pa, 1200.00000 K

| Rate constant             | True (fraction)       | Effective (fraction)  |
|---------------------------|-----------------------|-----------------------|
| Total                     | 3.72623e-12 (1.00 )   | 3.72576e-12 (1.00 )   |
| Formation of rad19        | 2.86288e-12 (0.768 )  | 2.86245e-12 (0.768 )  |
| H-abstraction to cyc2enyl | 6.53266e-13 (0.175 )  | 6.53266e-13 (0.175 )  |
| H-abstraction to cyclenyl | 2.10085e-13 (0.0564 ) | 2.10053e-13 (0.0564 ) |

| species                       | PYtrue      | Cumul    | PYeffective | Cumul    |
|-------------------------------|-------------|----------|-------------|----------|
| Indene+H                      | 0.687489    | 0.687489 | 0.687576    | 0.687576 |
| Benzene+cycloprop-2-enylidene | 0.175315    | 0.862804 | 0.175337    | 0.862913 |
| PhCHCCH2+H                    | 0.0694581   | 0.932262 | 0.0694669   | 0.932380 |
| Benzene+cycloprop-1-enylidene | 0.0563801   | 0.988642 | 0.0563786   | 0.988759 |
| Ph+MeAc                       | 0.00227314  | 0.990916 | 0.00227342  | 0.991032 |
| C2H2+PhCH2                    | 0.00219160  | 0.993107 | 0.00219188  | 0.993224 |
| Ph+Allene                     | 0.00208036  | 0.995187 | 0.00208062  | 0.995305 |
| PhCH2CCH+H                    | 0.00110729  | 0.996295 | 0.00110743  | 0.996412 |
| PhCCCH3+H                     | 0.00101213  | 0.997307 | 0.00101226  | 0.997424 |
| rad67                         | 0.000806482 | 0.998113 | 0.000806583 | 0.998231 |
| PhCCH+CH3                     | 0.000645815 | 0.998759 | 0.000645896 | 0.998877 |
| PhcycC3H3_A+H                 | 0.000345637 | 0.999105 | 0.000345681 | 0.999222 |
| rad35                         | 0.000290232 | 0.999395 | 0.000290268 | 0.999513 |
| PhcycC3H3_B+H                 | 0.000261317 | 0.999656 | 0.000261350 | 0.999774 |
| Phenyl+cycC3H4                | 0.000117514 | 0.999774 | 0.000000    | 0.999774 |
| PAH7+H                        | 6.09248e-05 | 0.999835 | 6.09325e-05 | 0.999835 |
| rad37                         | 5.51116e-05 | 0.999890 | 5.51185e-05 | 0.999890 |
| PAH10+CH3                     | 4.81339e-05 | 0.999938 | 4.81400e-05 | 0.999938 |
| PAH9+H                        | 1.22375e-05 | 0.999950 | 1.22390e-05 | 0.999950 |
| rad38                         | 1.13026e-05 | 0.999962 | 1.13040e-05 | 0.999962 |
| rad39                         | 1.06999e-05 | 0.999972 | 1.07012e-05 | 0.999972 |
| rad30                         | 1.03420e-05 | 0.999983 | 1.03433e-05 | 0.999983 |
| PAH3+H                        | 6.92033e-06 | 0.999990 | 6.92120e-06 | 0.999990 |
| rad9                          | 3.52673e-06 | 0.999993 | 3.52717e-06 | 0.999993 |
| rad46                         | 1.50331e-06 | 0.999995 | 1.50350e-06 | 0.999995 |
| rad50                         | 8.22439e-07 | 0.999995 | 8.22548e-07 | 0.999996 |
| rad54                         | 7.81781e-07 | 0.999996 | 7.81875e-07 | 0.999996 |
| rad60syn                      | 7.65523e-07 | 0.999997 | 7.65619e-07 | 0.999997 |
| rad59                         | 7.35611e-07 | 0.999998 | 7.35703e-07 | 0.999998 |
| PAH1+H                        | 6.15955e-07 | 0.999998 | 6.16033e-07 | 0.999998 |
| rad60anti                     | 4.66977e-07 | 0.999999 | 4.67036e-07 | 0.999999 |
| rad43                         | 2.45694e-07 | 0.999999 | 2.45725e-07 | 0.999999 |
| rad70                         | 1.92760e-07 | 0.999999 | 1.92785e-07 | 0.999999 |
| rad51                         | 1.61315e-07 | 0.999999 | 1.61336e-07 | 1.000000 |
| rad52                         | 5.91168e-08 | 0.999999 | 5.91242e-08 | 1.000000 |
| rad55                         | 5.00200e-08 | 0.999999 | 5.00264e-08 | 1.000000 |
| rad58                         | 4.54144e-08 | 1.000000 | 4.54202e-08 | 1.000000 |
| rad34                         | 3.99088e-08 | 1.000000 | 3.99139e-08 | 1.000000 |
| rad61                         | 3.34279e-08 | 1.000000 | 3.34320e-08 | 1.000000 |
| rad62                         | 2.12049e-08 | 1.000000 | 2.12076e-08 | 1.000000 |
| rad41                         | 1.10049e-08 | 1.000000 | 1.10063e-08 | 1.000000 |
| rad53                         | 7.65856e-09 | 1.000000 | 7.65952e-09 | 1.000000 |
| rad12                         | 7.13856e-09 | 1.000000 | 7.13946e-09 | 1.000000 |
| rad56                         | 5.80313e-09 | 1.000000 | 5.80386e-09 | 1.000000 |
| rad65                         | 4.85768e-09 | 1.000000 | 4.85829e-09 | 1.000000 |
| PAH8+H                        | 4.10434e-09 | 1.000000 | 4.10486e-09 | 1.000000 |
| rad64                         | 2.60314e-09 | 1.000000 | 2.60347e-09 | 1.000000 |
| rad15                         | 2.29911e-09 | 1.000000 | 2.29941e-09 | 1.000000 |
| rad68syn                      | 1.44365e-09 | 1.000000 | 1.44384e-09 | 1.000000 |
| rad71                         | 1.34589e-09 | 1.000000 | 1.34606e-09 | 1.000000 |
| rad73                         | 1.34584e-09 | 1.000000 | 1.34601e-09 | 1.000000 |
| rad42                         | 1.08066e-09 | 1.000000 | 1.08080e-09 | 1.000000 |
| rad68anti                     | 9.49402e-10 | 1.000000 | 9.49522e-10 | 1.000000 |
| rad40syn                      | 8.09301e-10 | 1.000000 | 8.09403e-10 | 1.000000 |
| rad23                         | 7.75189e-10 | 1.000000 | 7.75283e-10 | 1.000000 |
| rad40anti                     | 6.24447e-10 | 1.000000 | 6.24526e-10 | 1.000000 |
| rad45                         | 2.33406e-10 | 1.000000 | 2.33435e-10 | 1.000000 |
| rad6                          | 2.17373e-10 | 1.000000 | 2.17401e-10 | 1.000000 |
| rad19anti                     | 1.93858e-10 | 1.000000 | 1.93882e-10 | 1.000000 |
| rad2                          | 1.37386e-10 | 1.000000 | 1.37404e-10 | 1.000000 |
| rad1                          | 3.86674e-11 | 1.000000 | 3.86723e-11 | 1.000000 |
| rad8                          | 2.53715e-11 | 1.000000 | 2.53747e-11 | 1.000000 |
| rad36                         | 2.35411e-11 | 1.000000 | 2.35441e-11 | 1.000000 |

|          |             |          |             |          |
|----------|-------------|----------|-------------|----------|
| rad72    | 2.17422e-11 | 1.000000 | 2.17449e-11 | 1.000000 |
| rad21    | 2.07103e-11 | 1.000000 | 2.07129e-11 | 1.000000 |
| rad13    | 1.27841e-11 | 1.000000 | 1.27857e-11 | 1.000000 |
| rad11    | 1.25733e-11 | 1.000000 | 1.25749e-11 | 1.000000 |
| rad19syn | 1.13955e-11 | 1.000000 | 1.13970e-11 | 1.000000 |
| rad10    | 9.88340e-12 | 1.000000 | 9.88467e-12 | 1.000000 |
| rad20    | 5.44405e-12 | 1.000000 | 5.44473e-12 | 1.000000 |
| rad22    | 2.57954e-12 | 1.000000 | 2.57986e-12 | 1.000000 |
| rad26    | 1.81209e-12 | 1.000000 | 1.81232e-12 | 1.000000 |
| rad33    | 1.49756e-12 | 1.000000 | 1.49775e-12 | 1.000000 |
| rad7     | 1.32477e-12 | 1.000000 | 1.32494e-12 | 1.000000 |
| rad24    | 1.18513e-12 | 1.000000 | 1.18528e-12 | 1.000000 |
| rad3     | 1.17814e-12 | 1.000000 | 1.17829e-12 | 1.000000 |
| rad4     | 9.51599e-13 | 1.000000 | 9.51720e-13 | 1.000000 |
| rad25    | 2.93962e-13 | 1.000000 | 2.93999e-13 | 1.000000 |
| rad18    | 2.35461e-13 | 1.000000 | 2.35491e-13 | 1.000000 |
| rad27    | 1.53818e-13 | 1.000000 | 1.53838e-13 | 1.000000 |
| rad28    | 1.52701e-13 | 1.000000 | 1.52720e-13 | 1.000000 |
| rad31    | 2.55737e-14 | 1.000000 | 2.55769e-14 | 1.000000 |
| rad14    | 1.38941e-14 | 1.000000 | 1.38959e-14 | 1.000000 |
| rad47    | 1.44010e-15 | 1.000000 | 1.44029e-15 | 1.000000 |
| rad5     | 6.18706e-19 | 1.000000 | 6.18784e-19 | 1.000000 |

1.00000000 Pa, 1300.00000 K

=====

| Rate constant             | True (fraction)       | Effective (fraction)  |
|---------------------------|-----------------------|-----------------------|
| Total                     | 4.84401e-12 (1.00 )   | 4.84262e-12 (1.00 )   |
| Formation of rad19        | 3.55537e-12 (0.734 )  | 3.55411e-12 (0.734 )  |
| H-abstraction to cyc2enyl | 9.48893e-13 (0.196 )  | 9.48893e-13 (0.196 )  |
| H-abstraction to cyc1enyl | 3.39740e-13 (0.0701 ) | 3.39620e-13 (0.0701 ) |

| species                       | PYtrue      | Cumul    | PYeffective | Cumul    |
|-------------------------------|-------------|----------|-------------|----------|
| Indene+H                      | 0.627152    | 0.627152 | 0.627331    | 0.627331 |
| Benzene+cycloprop-2-enylidene | 0.195890    | 0.823042 | 0.195946    | 0.823277 |
| PhCHCCH2+H                    | 0.0908836   | 0.913926 | 0.0909095   | 0.914186 |
| Benzene+cycloprop-1-enylidene | 0.0701362   | 0.984062 | 0.0701313   | 0.984318 |
| Ph+MeAc                       | 0.00304463  | 0.987106 | 0.00304550  | 0.987363 |
| C2H2+PhCH2                    | 0.00290394  | 0.990010 | 0.00290476  | 0.990268 |
| Ph+Allene                     | 0.00288493  | 0.992895 | 0.00288576  | 0.993154 |
| PhCH2CCH+H                    | 0.00165469  | 0.994550 | 0.00165516  | 0.994809 |
| PhCCH3+H                      | 0.00130160  | 0.995852 | 0.00130197  | 0.996111 |
| rad67                         | 0.00110893  | 0.996960 | 0.00110924  | 0.997220 |
| PhCCH+CH3                     | 0.000809573 | 0.997770 | 0.000809803 | 0.998030 |
| PhcycC3H3_A+H                 | 0.000673417 | 0.998443 | 0.000673609 | 0.998703 |
| PhcycC3H3_B+H                 | 0.000561423 | 0.999005 | 0.000561583 | 0.999265 |
| rad35                         | 0.000398760 | 0.999404 | 0.000398874 | 0.999664 |
| Phenyl+cycC3H4                | 0.000260506 | 0.999664 | 0.000000    | 0.999664 |
| PAH10+CH3                     | 8.38205e-05 | 0.999748 | 8.38448e-05 | 0.999748 |
| PAH7+H                        | 7.89168e-05 | 0.999827 | 7.89400e-05 | 0.999827 |
| rad37                         | 7.83634e-05 | 0.999905 | 7.83859e-05 | 0.999905 |
| PAH9+H                        | 2.08567e-05 | 0.999926 | 2.08626e-05 | 0.999926 |
| rad38                         | 1.88209e-05 | 0.999945 | 1.88263e-05 | 0.999945 |
| rad30                         | 1.49378e-05 | 0.999960 | 1.49420e-05 | 0.999960 |
| rad39                         | 1.33383e-05 | 0.999973 | 1.33421e-05 | 0.999973 |
| PAH3+H                        | 1.25774e-05 | 0.999986 | 1.25809e-05 | 0.999986 |
| rad46                         | 2.74064e-06 | 0.999989 | 2.74142e-06 | 0.999988 |
| rad9                          | 2.26541e-06 | 0.999991 | 2.26605e-06 | 0.999991 |
| rad50                         | 1.75815e-06 | 0.999993 | 1.75865e-06 | 0.999992 |
| rad59                         | 1.29621e-06 | 0.999994 | 1.29658e-06 | 0.999994 |
| rad60syn                      | 1.24718e-06 | 0.999995 | 1.24754e-06 | 0.999995 |
| rad54                         | 1.23072e-06 | 0.999996 | 1.23107e-06 | 0.999996 |
| PAH1+H                        | 1.18208e-06 | 0.999998 | 1.18242e-06 | 0.999997 |
| rad60anti                     | 7.66768e-07 | 0.999998 | 7.66986e-07 | 0.999998 |
| rad43                         | 4.10095e-07 | 0.999999 | 4.10212e-07 | 0.999998 |
| rad51                         | 3.87805e-07 | 0.999999 | 3.87916e-07 | 0.999999 |
| rad70                         | 3.43776e-07 | 0.999999 | 3.43874e-07 | 0.999999 |
| rad52                         | 1.33738e-07 | 1.000000 | 1.33776e-07 | 0.999999 |
| rad58                         | 9.48962e-08 | 1.000000 | 9.49233e-08 | 0.999999 |
| rad55                         | 8.22278e-08 | 1.000000 | 8.22514e-08 | 0.999999 |
| rad34                         | 7.56514e-08 | 1.000000 | 7.56726e-08 | 1.000000 |
| rad61                         | 7.45541e-08 | 1.000000 | 7.45753e-08 | 1.000000 |
| rad62                         | 3.23613e-08 | 1.000000 | 3.23706e-08 | 1.000000 |
| rad41                         | 2.13296e-08 | 1.000000 | 2.13357e-08 | 1.000000 |
| rad53                         | 1.49239e-08 | 1.000000 | 1.49281e-08 | 1.000000 |
| rad56                         | 1.23806e-08 | 1.000000 | 1.23841e-08 | 1.000000 |
| rad65                         | 1.15147e-08 | 1.000000 | 1.15180e-08 | 1.000000 |
| PAH8+H                        | 1.11983e-08 | 1.000000 | 1.12015e-08 | 1.000000 |
| rad12                         | 5.89994e-09 | 1.000000 | 5.90163e-09 | 1.000000 |

|           |             |         |             |          |
|-----------|-------------|---------|-------------|----------|
| rad64     | 5.02757e-09 | 1.00000 | 5.02901e-09 | 1.000000 |
| rad71     | 4.77981e-09 | 1.00000 | 4.78117e-09 | 1.000000 |
| rad73     | 4.37714e-09 | 1.00000 | 4.37839e-09 | 1.000000 |
| rad68syn  | 3.36208e-09 | 1.00000 | 3.36305e-09 | 1.000000 |
| rad15     | 2.85040e-09 | 1.00000 | 2.85122e-09 | 1.000000 |
| rad68anti | 2.20482e-09 | 1.00000 | 2.20544e-09 | 1.000000 |
| rad40syn  | 2.06352e-09 | 1.00000 | 2.06411e-09 | 1.000000 |
| rad42     | 1.87968e-09 | 1.00000 | 1.88022e-09 | 1.000000 |
| rad40anti | 1.60622e-09 | 1.00000 | 1.60667e-09 | 1.000000 |
| rad23     | 7.24130e-10 | 1.00000 | 7.24336e-10 | 1.000000 |
| rad6      | 2.71344e-10 | 1.00000 | 2.71421e-10 | 1.000000 |
| rad45     | 2.19722e-10 | 1.00000 | 2.19785e-10 | 1.000000 |
| rad19anti | 1.48427e-10 | 1.00000 | 1.48470e-10 | 1.000000 |
| rad2      | 1.02001e-10 | 1.00000 | 1.02031e-10 | 1.000000 |
| rad72     | 9.40705e-11 | 1.00000 | 9.40969e-11 | 1.000000 |
| rad11     | 6.61805e-11 | 1.00000 | 6.61994e-11 | 1.000000 |
| rad8      | 4.42428e-11 | 1.00000 | 4.42555e-11 | 1.000000 |
| rad21     | 3.04300e-11 | 1.00000 | 3.04387e-11 | 1.000000 |
| rad1      | 2.89138e-11 | 1.00000 | 2.89220e-11 | 1.000000 |
| rad13     | 2.26225e-11 | 1.00000 | 2.26290e-11 | 1.000000 |
| rad36     | 2.22566e-11 | 1.00000 | 2.22630e-11 | 1.000000 |
| rad10     | 1.53700e-11 | 1.00000 | 1.53744e-11 | 1.000000 |
| rad7      | 1.07631e-11 | 1.00000 | 1.07663e-11 | 1.000000 |
| rad19syn  | 1.00706e-11 | 1.00000 | 1.00735e-11 | 1.000000 |
| rad20     | 7.50862e-12 | 1.00000 | 7.51074e-12 | 1.000000 |
| rad22     | 3.72339e-12 | 1.00000 | 3.72445e-12 | 1.000000 |
| rad33     | 1.76777e-12 | 1.00000 | 1.76828e-12 | 1.000000 |
| rad18     | 1.73398e-12 | 1.00000 | 1.73448e-12 | 1.000000 |
| rad26     | 1.66008e-12 | 1.00000 | 1.66055e-12 | 1.000000 |
| rad24     | 1.53482e-12 | 1.00000 | 1.53526e-12 | 1.000000 |
| rad3      | 8.29860e-13 | 1.00000 | 8.30096e-13 | 1.000000 |
| rad4      | 6.67512e-13 | 1.00000 | 6.67702e-13 | 1.000000 |
| rad25     | 5.68319e-13 | 1.00000 | 5.68480e-13 | 1.000000 |
| rad27     | 2.72190e-13 | 1.00000 | 2.72268e-13 | 1.000000 |
| rad28     | 1.78872e-13 | 1.00000 | 1.78923e-13 | 1.000000 |
| rad31     | 2.62747e-14 | 1.00000 | 2.62822e-14 | 1.000000 |
| rad14     | 2.46589e-14 | 1.00000 | 2.46659e-14 | 1.000000 |
| rad47     | 3.41351e-15 | 1.00000 | 3.41449e-15 | 1.000000 |
| rad5      | 1.30570e-17 | 1.00000 | 1.30607e-17 | 1.000000 |

1.00000000 Pa, 1400.00000 K

| Rate constant             | True (fraction)       | Effective (fraction)  |
|---------------------------|-----------------------|-----------------------|
| Total                     | 6.19360e-12 (1.00 )   | 6.18997e-12 (1.00 )   |
| Formation of rad19        | 4.34185e-12 (0.701 )  | 4.33861e-12 (0.701 )  |
| H-abstraction to cyc2enyl | 1.32990e-12 (0.215 )  | 1.32990e-12 (0.215 )  |
| H-abstraction to cyclenyl | 5.21850e-13 (0.0843 ) | 5.21461e-13 (0.0842 ) |

| species                       | PYtrue      | Cumul    | PYeffective | Cumul    |
|-------------------------------|-------------|----------|-------------|----------|
| Indene+H                      | 0.566022    | 0.566022 | 0.566355    | 0.566355 |
| Benzene+cycloprop-2-enylidene | 0.214721    | 0.780743 | 0.214847    | 0.781202 |
| PhCHCCH2+H                    | 0.113529    | 0.894273 | 0.113596    | 0.894798 |
| Benzene+cycloprop-1-enylidene | 0.0842564   | 0.978529 | 0.0842429   | 0.979041 |
| Ph+MeAc                       | 0.00387295  | 0.982402 | 0.00387523  | 0.982916 |
| Ph+Allene                     | 0.00376047  | 0.986163 | 0.00376268  | 0.986679 |
| C2H2+PhCH2                    | 0.00367940  | 0.989842 | 0.00368156  | 0.990360 |
| PhCH2CCH+H                    | 0.00231309  | 0.992155 | 0.00231444  | 0.992675 |
| PhCCCH3+H                     | 0.00159644  | 0.993751 | 0.00159737  | 0.994272 |
| rad67                         | 0.00144415  | 0.995196 | 0.00144499  | 0.995717 |
| PhcycC3H3_A+H                 | 0.00120490  | 0.996400 | 0.00120561  | 0.996923 |
| PhcycC3H3_B+H                 | 0.00109185  | 0.997492 | 0.00109249  | 0.998015 |
| PhCCH+CH3                     | 0.000988708 | 0.998481 | 0.000989292 | 0.999004 |
| Phenyl+cycC3H4                | 0.000523345 | 0.999004 | 0.000000    | 0.999004 |
| rad35                         | 0.000519435 | 0.999524 | 0.000519740 | 0.999524 |
| PAH10+CH3                     | 0.000132952 | 0.999657 | 0.000133030 | 0.999657 |
| rad37                         | 0.000103972 | 0.999761 | 0.000104033 | 0.999761 |
| PAH7+H                        | 9.76657e-05 | 0.999858 | 9.77230e-05 | 0.999859 |
| PAH9+H                        | 3.30484e-05 | 0.999891 | 3.30678e-05 | 0.999892 |
| rad38                         | 2.89893e-05 | 0.999920 | 2.90063e-05 | 0.999921 |
| PAH3+H                        | 2.09798e-05 | 0.999941 | 2.09920e-05 | 0.999942 |
| rad30                         | 2.03493e-05 | 0.999962 | 2.03613e-05 | 0.999962 |
| rad39                         | 1.60330e-05 | 0.999978 | 1.60424e-05 | 0.999978 |
| rad46                         | 4.60547e-06 | 0.999982 | 4.60817e-06 | 0.999983 |
| rad50                         | 3.39329e-06 | 0.999986 | 3.39528e-06 | 0.999986 |
| rad59                         | 2.10258e-06 | 0.999988 | 2.10382e-06 | 0.999988 |
| PAH1+H                        | 2.05240e-06 | 0.999990 | 2.05361e-06 | 0.999991 |
| rad60syn                      | 1.88980e-06 | 0.999992 | 1.89091e-06 | 0.999992 |
| rad54                         | 1.78095e-06 | 0.999994 | 1.78199e-06 | 0.999994 |

|           |             |          |             |          |
|-----------|-------------|----------|-------------|----------|
| rad9      | 1.42835e-06 | 0.999995 | 1.42919e-06 | 0.999996 |
| rad60anti | 1.16983e-06 | 0.999996 | 1.17051e-06 | 0.999997 |
| rad51     | 8.27382e-07 | 0.999997 | 8.27866e-07 | 0.999998 |
| rad43     | 6.31833e-07 | 0.999998 | 6.32204e-07 | 0.999998 |
| rad70     | 5.60275e-07 | 0.999998 | 5.60603e-07 | 0.999999 |
| rad52     | 2.70783e-07 | 0.999999 | 2.70941e-07 | 0.999999 |
| rad58     | 1.78460e-07 | 0.999999 | 1.78565e-07 | 0.999999 |
| rad61     | 1.46305e-07 | 0.999999 | 1.46391e-07 | 0.999999 |
| rad34     | 1.30073e-07 | 0.999999 | 1.30148e-07 | 1.000000 |
| rad55     | 1.23579e-07 | 0.999999 | 1.23652e-07 | 1.000000 |
| rad62     | 4.61556e-08 | 0.999999 | 4.61827e-08 | 1.000000 |
| rad41     | 3.74053e-08 | 0.999999 | 3.74272e-08 | 1.000000 |
| PAH8+H    | 2.63244e-08 | 0.999999 | 2.63398e-08 | 1.000000 |
| rad53     | 2.60415e-08 | 0.999999 | 2.60567e-08 | 1.000000 |
| rad65     | 2.42409e-08 | 0.999999 | 2.42552e-08 | 1.000000 |
| rad56     | 2.33559e-08 | 0.999999 | 2.33696e-08 | 1.000000 |
| rad71     | 1.41636e-08 | 0.999999 | 1.41719e-08 | 1.000000 |
| rad73     | 1.20401e-08 | 0.999999 | 1.20471e-08 | 1.000000 |
| rad64     | 8.79881e-09 | 0.999999 | 8.80399e-09 | 1.000000 |
| rad68syn  | 6.90260e-09 | 0.999999 | 6.90665e-09 | 1.000000 |
| rad15     | 5.24935e-09 | 0.999999 | 5.25242e-09 | 1.000000 |
| rad12     | 4.69041e-09 | 0.999999 | 4.69317e-09 | 1.000000 |
| rad40syn  | 4.57883e-09 | 0.999999 | 4.58151e-09 | 1.000000 |
| rad68anti | 4.51570e-09 | 0.999999 | 4.51835e-09 | 1.000000 |
| rad40anti | 3.59156e-09 | 0.999999 | 3.59366e-09 | 1.000000 |
| rad42     | 3.00697e-09 | 0.999999 | 3.00873e-09 | 1.000000 |
| rad23     | 6.92484e-10 | 0.999999 | 6.92890e-10 | 1.000000 |
| rad6      | 3.54153e-10 | 0.999999 | 3.54361e-10 | 1.000000 |
| rad72     | 3.28906e-10 | 0.999999 | 3.29099e-10 | 1.000000 |
| rad45     | 2.02459e-10 | 0.999999 | 2.02578e-10 | 1.000000 |
| rad11     | 1.58676e-10 | 0.999999 | 1.58769e-10 | 1.000000 |
| rad19anti | 1.15143e-10 | 0.999999 | 1.15211e-10 | 1.000000 |
| rad2      | 7.55148e-11 | 0.999999 | 7.55588e-11 | 1.000000 |
| rad8      | 5.66851e-11 | 0.999999 | 5.67183e-11 | 1.000000 |
| rad7      | 4.05812e-11 | 0.999999 | 4.06050e-11 | 1.000000 |
| rad21     | 3.67751e-11 | 0.999999 | 3.67967e-11 | 1.000000 |
| rad10     | 3.47502e-11 | 0.999999 | 3.47705e-11 | 1.000000 |
| rad13     | 2.62285e-11 | 0.999999 | 2.62440e-11 | 1.000000 |
| rad1      | 2.16190e-11 | 0.999999 | 2.16316e-11 | 1.000000 |
| rad36     | 2.06425e-11 | 0.999999 | 2.06546e-11 | 1.000000 |
| rad19syn  | 8.90593e-12 | 0.999999 | 8.91116e-12 | 1.000000 |
| rad20     | 8.39979e-12 | 0.999999 | 8.40468e-12 | 1.000000 |
| rad18     | 5.72898e-12 | 0.999999 | 5.73234e-12 | 1.000000 |
| rad22     | 4.74022e-12 | 0.999999 | 4.74301e-12 | 1.000000 |
| rad26     | 2.17976e-12 | 0.999999 | 2.18104e-12 | 1.000000 |
| rad24     | 1.80319e-12 | 0.999999 | 1.80425e-12 | 1.000000 |
| rad33     | 1.72661e-12 | 0.999999 | 1.72762e-12 | 1.000000 |
| rad25     | 7.73985e-13 | 0.999999 | 7.74442e-13 | 1.000000 |
| rad3      | 5.85944e-13 | 0.999999 | 5.86288e-13 | 1.000000 |
| rad4      | 4.68497e-13 | 0.999999 | 4.68772e-13 | 1.000000 |
| rad27     | 3.51818e-13 | 0.999999 | 3.52024e-13 | 1.000000 |
| rad28     | 2.40780e-13 | 0.999999 | 2.40921e-13 | 1.000000 |
| rad14     | 3.06977e-14 | 0.999999 | 3.07157e-14 | 1.000000 |
| rad31     | 2.62637e-14 | 0.999999 | 2.62791e-14 | 1.000000 |
| rad47     | 7.15358e-15 | 0.999999 | 7.15776e-15 | 1.000000 |
| rad5      | 3.10977e-16 | 0.999999 | 3.11159e-16 | 1.000000 |

1.00000000 Pa, 1500.00000 K

=====

| Rate constant             | True (fraction)       | Effective (fraction)  |
|---------------------------|-----------------------|-----------------------|
| Total                     | 7.80417e-12 (1.00 )   | 7.79561e-12 (1.00 )   |
| Formation of rad19        | 5.22661e-12 (0.670 )  | 5.21915e-12 (0.669 )  |
| H-abstraction to cyc2enyl | 1.80920e-12 (0.232 )  | 1.80920e-12 (0.232 )  |
| H-abstraction to cyc1enyl | 7.68359e-13 (0.0985 ) | 7.67262e-13 (0.0984 ) |

| species                       | PYtrue     | Cumul    | PYeffective | Cumul    |
|-------------------------------|------------|----------|-------------|----------|
| Indene+H                      | 0.505867   | 0.505867 | 0.506423    | 0.506423 |
| Benzene+cycloprop-2-enylidene | 0.231825   | 0.737692 | 0.232079    | 0.738502 |
| PhCHCCH2+H                    | 0.135969   | 0.873661 | 0.136118    | 0.874620 |
| Benzene+cycloprop-1-enylidene | 0.0984549  | 0.972116 | 0.0984223   | 0.973042 |
| Ph+MeAc                       | 0.00470574 | 0.976821 | 0.00471091  | 0.977753 |
| Ph+Allene                     | 0.00464765 | 0.981469 | 0.00465275  | 0.982406 |
| C2H2+PhCH2                    | 0.00447305 | 0.985942 | 0.00447797  | 0.986884 |
| PhCH2CCH+H                    | 0.00304825 | 0.988990 | 0.00305160  | 0.989935 |
| PhcycC3H3_A+H                 | 0.00198977 | 0.990980 | 0.00199195  | 0.991927 |
| PhcycC3H3_B+H                 | 0.00193281 | 0.992913 | 0.00193493  | 0.993862 |
| PhCCCH3+H                     | 0.00187668 | 0.994789 | 0.00187875  | 0.995741 |
| rad67                         | 0.00179099 | 0.996580 | 0.00179296  | 0.997534 |

|                |             |          |             |          |
|----------------|-------------|----------|-------------|----------|
| PhCCH+CH3      | 0.00117784  | 0.997758 | 0.00117913  | 0.998713 |
| Phenyl+cycC3H4 | 0.000956146 | 0.998714 | 0.00000     | 0.998713 |
| rad35          | 0.000644856 | 0.999359 | 0.000645564 | 0.999358 |
| PAH10+CH3      | 0.000194197 | 0.999554 | 0.000194410 | 0.999553 |
| rad37          | 0.000129808 | 0.999683 | 0.000129950 | 0.999683 |
| PAH7+H         | 0.000116419 | 0.999800 | 0.000116546 | 0.999799 |
| PAH9+H         | 4.88552e-05 | 0.999849 | 4.89088e-05 | 0.999848 |
| rad38          | 4.16024e-05 | 0.999890 | 4.16480e-05 | 0.999890 |
| PAH3+H         | 3.23388e-05 | 0.999923 | 3.23743e-05 | 0.999922 |
| rad30          | 2.62813e-05 | 0.999949 | 2.63101e-05 | 0.999949 |
| rad39          | 1.87897e-05 | 0.999968 | 1.88104e-05 | 0.999967 |
| rad46          | 7.16226e-06 | 0.999975 | 7.17013e-06 | 0.999975 |
| rad50          | 5.93840e-06 | 0.999981 | 5.94492e-06 | 0.999981 |
| PAH1+H         | 3.25738e-06 | 0.999984 | 3.26096e-06 | 0.999984 |
| rad59          | 3.16168e-06 | 0.999987 | 3.16515e-06 | 0.999987 |
| rad60syn       | 2.67976e-06 | 0.999990 | 2.68270e-06 | 0.999990 |
| rad54          | 2.39843e-06 | 0.999992 | 2.40106e-06 | 0.999992 |
| rad60anti      | 1.66872e-06 | 0.999994 | 1.67055e-06 | 0.999994 |
| rad51          | 1.57357e-06 | 0.999995 | 1.57530e-06 | 0.999995 |
| rad43          | 9.05602e-07 | 0.999996 | 9.06594e-07 | 0.999996 |
| rad9           | 8.98403e-07 | 0.999997 | 8.99391e-07 | 0.999997 |
| rad70          | 8.42789e-07 | 0.999998 | 8.43715e-07 | 0.999998 |
| rad52          | 4.92990e-07 | 0.999999 | 4.93532e-07 | 0.999998 |
| rad58          | 3.04467e-07 | 0.999999 | 3.04801e-07 | 0.999999 |
| rad61          | 2.56161e-07 | 0.999999 | 2.56442e-07 | 0.999999 |
| rad34          | 2.04944e-07 | 0.999999 | 2.05168e-07 | 0.999999 |
| rad55          | 1.72016e-07 | 1.000000 | 1.72205e-07 | 0.999999 |
| rad62          | 6.20600e-08 | 1.000000 | 6.21281e-08 | 0.999999 |
| rad41          | 5.99092e-08 | 1.000000 | 5.99749e-08 | 1.000000 |
| PAH8+H         | 5.38729e-08 | 1.000000 | 5.39320e-08 | 1.000000 |
| rad65          | 4.55526e-08 | 1.000000 | 4.56027e-08 | 1.000000 |
| rad53          | 4.12884e-08 | 1.000000 | 4.13338e-08 | 1.000000 |
| rad56          | 3.95693e-08 | 1.000000 | 3.96128e-08 | 1.000000 |
| rad71          | 3.50065e-08 | 1.000000 | 3.50450e-08 | 1.000000 |
| rad73          | 2.80740e-08 | 1.000000 | 2.81048e-08 | 1.000000 |
| rad64          | 1.41262e-08 | 1.000000 | 1.41417e-08 | 1.000000 |
| rad68syn       | 1.26346e-08 | 1.000000 | 1.26484e-08 | 1.000000 |
| rad40syn       | 8.93668e-09 | 1.000000 | 8.94651e-09 | 1.000000 |
| rad15          | 8.66558e-09 | 1.000000 | 8.67509e-09 | 1.000000 |
| rad68anti      | 8.24881e-09 | 1.000000 | 8.25793e-09 | 1.000000 |
| rad40anti      | 7.05450e-09 | 1.000000 | 7.06220e-09 | 1.000000 |
| rad42          | 4.46794e-09 | 1.000000 | 4.47284e-09 | 1.000000 |
| rad12          | 3.66423e-09 | 1.000000 | 3.66826e-09 | 1.000000 |
| rad72          | 9.20818e-10 | 1.000000 | 9.21826e-10 | 1.000000 |
| rad23          | 6.70296e-10 | 1.000000 | 6.71031e-10 | 1.000000 |
| rad6           | 4.69548e-10 | 1.000000 | 4.70063e-10 | 1.000000 |
| rad11          | 2.33888e-10 | 1.000000 | 2.34145e-10 | 1.000000 |
| rad45          | 1.83447e-10 | 1.000000 | 1.83649e-10 | 1.000000 |
| rad19anti      | 9.04906e-11 | 1.000000 | 9.05898e-11 | 1.000000 |
| rad7           | 7.73359e-11 | 1.000000 | 7.74215e-11 | 1.000000 |
| rad10          | 6.37488e-11 | 1.000000 | 6.38188e-11 | 1.000000 |
| rad8           | 6.24761e-11 | 1.000000 | 6.25447e-11 | 1.000000 |
| rad2           | 5.59589e-11 | 1.000000 | 5.60203e-11 | 1.000000 |
| rad21          | 3.98240e-11 | 1.000000 | 3.98677e-11 | 1.000000 |
| rad13          | 2.44443e-11 | 1.000000 | 2.44711e-11 | 1.000000 |
| rad36          | 1.88378e-11 | 1.000000 | 1.88585e-11 | 1.000000 |
| rad1           | 1.62083e-11 | 1.000000 | 1.62261e-11 | 1.000000 |
| rad18          | 1.05334e-11 | 1.000000 | 1.05449e-11 | 1.000000 |
| rad20          | 8.39575e-12 | 1.000000 | 8.40495e-12 | 1.000000 |
| rad19syn       | 7.89908e-12 | 1.000000 | 7.90771e-12 | 1.000000 |
| rad26          | 6.35925e-12 | 1.000000 | 6.36623e-12 | 1.000000 |
| rad22          | 5.43242e-12 | 1.000000 | 5.43839e-12 | 1.000000 |
| rad24          | 1.99086e-12 | 1.000000 | 1.99305e-12 | 1.000000 |
| rad33          | 1.52274e-12 | 1.000000 | 1.52441e-12 | 1.000000 |
| rad25          | 8.68641e-13 | 1.000000 | 8.69598e-13 | 1.000000 |
| rad28          | 4.23228e-13 | 1.000000 | 4.23693e-13 | 1.000000 |
| rad3           | 4.16117e-13 | 1.000000 | 4.16574e-13 | 1.000000 |
| rad27          | 3.82053e-13 | 1.000000 | 3.82473e-13 | 1.000000 |
| rad4           | 3.30000e-13 | 1.000000 | 3.30362e-13 | 1.000000 |
| rad14          | 3.15991e-14 | 1.000000 | 3.16338e-14 | 1.000000 |
| rad31          | 2.56266e-14 | 1.000000 | 2.56547e-14 | 1.000000 |
| rad47          | 1.33195e-14 | 1.000000 | 1.33341e-14 | 1.000000 |
| rad5           | 5.40671e-15 | 1.000000 | 5.41265e-15 | 1.000000 |

0.100000000 Pa, 20.0000000 K

| Rate constant      | True (fraction)     | Effective (fraction) |
|--------------------|---------------------|----------------------|
| Total              | 1.24541e-22 (1.00 ) | 1.24541e-22 (1.00 )  |
| Formation of rad19 | 1.24541e-22 (1.00 ) | 1.24541e-22 (1.00 )  |

H-abstraction to cyc2enyl | 3.84323e-68 (3.09e-46) 3.84323e-68 (3.09e-46)  
H-abstraction to cyclenyl | 6.26313e-106 (5.03e-84) 6.26313e-106 (5.03e-84)

| species        | PYtrue      | Cumul    | PYeffective | Cumul    |
|----------------|-------------|----------|-------------|----------|
| Indene+H       | 0.999773    | 0.999773 | 0.999773    | 0.999773 |
| PhCHCCH2+H     | 0.000215322 | 0.999988 | 0.000215322 | 0.999988 |
| PhCCH+CH3      | 3.52009e-06 | 0.999992 | 3.52009e-06 | 0.999992 |
| C2H2+PhCH2     | 2.22612e-06 | 0.999994 | 2.22612e-06 | 0.999994 |
| PhCCCH3+H      | 2.06105e-06 | 0.999996 | 2.06105e-06 | 0.999996 |
| rad6           | 1.81155e-06 | 0.999998 | 1.81155e-06 | 0.999998 |
| Ph+MeAc        | 1.50381e-06 | 0.999999 | 1.50381e-06 | 0.999999 |
| rad67          | 4.66982e-07 | 1.000000 | 4.66982e-07 | 1.000000 |
| rad35          | 2.06885e-07 | 1.000000 | 2.06885e-07 | 1.000000 |
| Ph+Allene      | 8.90355e-08 | 1.000000 | 8.90355e-08 | 1.000000 |
| PAH7+H         | 1.17078e-08 | 1.000000 | 1.17078e-08 | 1.000000 |
| PhCH2CCH+H     | 1.05501e-08 | 1.000000 | 1.05501e-08 | 1.000000 |
| rad37          | 4.50036e-09 | 1.000000 | 4.50036e-09 | 1.000000 |
| rad30          | 3.79105e-09 | 1.000000 | 3.79105e-09 | 1.000000 |
| rad39          | 3.28680e-09 | 1.000000 | 3.28680e-09 | 1.000000 |
| rad28          | 2.17444e-09 | 1.000000 | 2.17444e-09 | 1.000000 |
| rad2           | 1.97775e-09 | 1.000000 | 1.97775e-09 | 1.000000 |
| rad7           | 2.78973e-10 | 1.000000 | 2.78973e-10 | 1.000000 |
| rad26          | 2.46483e-10 | 1.000000 | 2.46483e-10 | 1.000000 |
| PAH9+H         | 1.95563e-10 | 1.000000 | 1.95563e-10 | 1.000000 |
| rad10          | 1.37374e-10 | 1.000000 | 1.37374e-10 | 1.000000 |
| rad1           | 1.24928e-10 | 1.000000 | 1.24928e-10 | 1.000000 |
| rad11          | 8.50299e-11 | 1.000000 | 8.50299e-11 | 1.000000 |
| rad38          | 8.42248e-11 | 1.000000 | 8.42248e-11 | 1.000000 |
| rad3           | 1.82643e-11 | 1.000000 | 1.82643e-11 | 1.000000 |
| rad60syn       | 1.62811e-11 | 1.000000 | 1.62811e-11 | 1.000000 |
| rad23          | 1.04347e-11 | 1.000000 | 1.04347e-11 | 1.000000 |
| rad9           | 9.64569e-12 | 1.000000 | 9.64569e-12 | 1.000000 |
| rad4           | 9.22482e-12 | 1.000000 | 9.22482e-12 | 1.000000 |
| rad60anti      | 7.94267e-12 | 1.000000 | 7.94267e-12 | 1.000000 |
| PAH3+H         | 6.41369e-12 | 1.000000 | 6.41369e-12 | 1.000000 |
| PAH10+CH3      | 5.23275e-12 | 1.000000 | 5.23275e-12 | 1.000000 |
| rad46          | 4.74824e-12 | 1.000000 | 4.74824e-12 | 1.000000 |
| rad59          | 1.33204e-12 | 1.000000 | 1.33204e-12 | 1.000000 |
| rad13          | 8.75928e-13 | 1.000000 | 8.75928e-13 | 1.000000 |
| PhcycC3H3_A+H  | 4.09821e-13 | 1.000000 | 4.09821e-13 | 1.000000 |
| rad45          | 2.55476e-13 | 1.000000 | 2.55476e-13 | 1.000000 |
| rad43          | 2.43186e-13 | 1.000000 | 2.43186e-13 | 1.000000 |
| rad54          | 1.02865e-13 | 1.000000 | 1.02865e-13 | 1.000000 |
| rad62          | 4.77788e-14 | 1.000000 | 4.77788e-14 | 1.000000 |
| rad50          | 2.88207e-14 | 1.000000 | 2.88207e-14 | 1.000000 |
| rad36          | 1.56692e-14 | 1.000000 | 1.56692e-14 | 1.000000 |
| rad22          | 1.40097e-14 | 1.000000 | 1.40097e-14 | 1.000000 |
| rad15          | 5.81125e-15 | 1.000000 | 5.81125e-15 | 1.000000 |
| rad70          | 1.63996e-15 | 1.000000 | 1.63996e-15 | 1.000000 |
| rad14          | 1.56089e-15 | 1.000000 | 1.56089e-15 | 1.000000 |
| rad33          | 1.38861e-15 | 1.000000 | 1.38861e-15 | 1.000000 |
| rad27          | 1.29591e-15 | 1.000000 | 1.29591e-15 | 1.000000 |
| rad55          | 6.26162e-16 | 1.000000 | 6.26162e-16 | 1.000000 |
| rad25          | 6.10049e-16 | 1.000000 | 6.10049e-16 | 1.000000 |
| PAH1+H         | 3.43032e-16 | 1.000000 | 3.43032e-16 | 1.000000 |
| rad52          | 1.74862e-16 | 1.000000 | 1.74862e-16 | 1.000000 |
| rad58          | 7.04303e-17 | 1.000000 | 7.04303e-17 | 1.000000 |
| rad51          | 4.08682e-17 | 1.000000 | 4.08682e-17 | 1.000000 |
| Phenyl+cycC3H4 | 2.77347e-17 | 1.000000 | 0.000000    | 1.000000 |
| rad34          | 1.40547e-17 | 1.000000 | 1.40547e-17 | 1.000000 |
| rad41          | 2.51636e-18 | 1.000000 | 2.51636e-18 | 1.000000 |
| rad42          | 2.48596e-18 | 1.000000 | 2.48596e-18 | 1.000000 |
| rad65          | 7.94010e-19 | 1.000000 | 7.94010e-19 | 1.000000 |
| rad5           | 2.84734e-19 | 1.000000 | 2.84734e-19 | 1.000000 |
| rad18          | 4.88024e-20 | 1.000000 | 4.88024e-20 | 1.000000 |
| rad12          | 4.53160e-20 | 1.000000 | 4.53160e-20 | 1.000000 |
| rad20          | 3.99724e-20 | 1.000000 | 3.99724e-20 | 1.000000 |
| rad31          | 3.70034e-20 | 1.000000 | 3.70034e-20 | 1.000000 |
| rad21          | 2.62177e-20 | 1.000000 | 2.62177e-20 | 1.000000 |
| rad19anti      | 5.94168e-21 | 1.000000 | 5.94168e-21 | 1.000000 |
| rad24          | 2.01644e-21 | 1.000000 | 2.01644e-21 | 1.000000 |
| PhcycC3H3_B+H  | 2.83036e-24 | 1.000000 | 2.83036e-24 | 1.000000 |
| rad53          | 1.92063e-25 | 1.000000 | 1.92063e-25 | 1.000000 |
| rad47          | 6.91734e-26 | 1.000000 | 6.91734e-26 | 1.000000 |
| rad64          | 2.17560e-27 | 1.000000 | 2.17560e-27 | 1.000000 |
| rad61          | 4.65782e-34 | 1.000000 | 4.65782e-34 | 1.000000 |
| rad56          | 5.44952e-35 | 1.000000 | 5.44952e-35 | 1.000000 |
| rad68syn       | 6.71647e-37 | 1.000000 | 6.71647e-37 | 1.000000 |
| rad68anti      | 5.65137e-37 | 1.000000 | 5.65137e-37 | 1.000000 |



|                               |             |         |             |         |
|-------------------------------|-------------|---------|-------------|---------|
| rad19syn                      | 1.37417e-40 | 1.00000 | 1.37417e-40 | 1.00000 |
| rad73                         | 2.07506e-44 | 1.00000 | 2.07506e-44 | 1.00000 |
| rad40syn                      | 1.45840e-45 | 1.00000 | 1.45840e-45 | 1.00000 |
| rad40anti                     | 1.13549e-45 | 1.00000 | 1.13549e-45 | 1.00000 |
| Benzene+cycloprop-2-enylidene | 3.08591e-46 | 1.00000 | 3.08591e-46 | 1.00000 |
| PAH8+H                        | 1.83714e-49 | 1.00000 | 1.83714e-49 | 1.00000 |
| rad71                         | 1.73349e-52 | 1.00000 | 1.73349e-52 | 1.00000 |
| rad8                          | 1.94460e-57 | 1.00000 | 1.94460e-57 | 1.00000 |
| Benzene+cycloprop-1-enylidene | 5.02895e-84 | 1.00000 | 5.02895e-84 | 1.00000 |

0.100000000 Pa, 30.0000000 K

| Rate constant             | True (fraction)        | Effective (fraction)   |
|---------------------------|------------------------|------------------------|
| Total                     | 8.13009e-20 (1.00 )    | 8.13009e-20 (1.00 )    |
| Formation of rad19        | 8.13009e-20 (1.00 )    | 8.13009e-20 (1.00 )    |
| H-abstraction to cyc2enyl | 1.08880e-49 (1.34e-30) | 1.08880e-49 (1.34e-30) |
| H-abstraction to cyclenyl | 7.55172e-75 (9.29e-56) | 7.55172e-75 (9.29e-56) |

| species        | PYtrue      | Cumul    | PYeffective | Cumul    |
|----------------|-------------|----------|-------------|----------|
| Indene+H       | 0.999771    | 0.999771 | 0.999771    | 0.999771 |
| PhCHCCH2+H     | 0.000217816 | 0.999989 | 0.000217816 | 0.999989 |
| PhCCH+CH3      | 3.68587e-06 | 0.999993 | 3.68587e-06 | 0.999993 |
| C2H2+PhCH2     | 2.49895e-06 | 0.999995 | 2.49895e-06 | 0.999995 |
| PhCCCH3+H      | 2.10860e-06 | 0.999997 | 2.10860e-06 | 0.999997 |
| Ph+MeAc        | 1.54813e-06 | 0.999999 | 1.54813e-06 | 0.999999 |
| rad67          | 4.74137e-07 | 0.999999 | 4.74137e-07 | 0.999999 |
| rad6           | 4.30244e-07 | 1.000000 | 4.30244e-07 | 1.000000 |
| rad35          | 2.09942e-07 | 1.000000 | 2.09942e-07 | 1.000000 |
| Ph+Allene      | 1.11575e-07 | 1.000000 | 1.11575e-07 | 1.000000 |
| PAH7+H         | 1.49228e-08 | 1.000000 | 1.49228e-08 | 1.000000 |
| PhCH2CCH+H     | 1.32786e-08 | 1.000000 | 1.32786e-08 | 1.000000 |
| rad37          | 4.62249e-09 | 1.000000 | 4.62249e-09 | 1.000000 |
| rad39          | 4.19775e-09 | 1.000000 | 4.19775e-09 | 1.000000 |
| rad30          | 3.88931e-09 | 1.000000 | 3.88931e-09 | 1.000000 |
| rad28          | 4.85593e-10 | 1.000000 | 4.85593e-10 | 1.000000 |
| rad2           | 4.60332e-10 | 1.000000 | 4.60332e-10 | 1.000000 |
| PAH9+H         | 2.26835e-10 | 1.000000 | 2.26835e-10 | 1.000000 |
| rad38          | 9.64617e-11 | 1.000000 | 9.64617e-11 | 1.000000 |
| rad26          | 6.00607e-11 | 1.000000 | 6.00607e-11 | 1.000000 |
| rad7           | 5.94605e-11 | 1.000000 | 5.94605e-11 | 1.000000 |
| rad10          | 3.06274e-11 | 1.000000 | 3.06274e-11 | 1.000000 |
| rad1           | 2.90931e-11 | 1.000000 | 2.90931e-11 | 1.000000 |
| rad11          | 1.74611e-11 | 1.000000 | 1.74611e-11 | 1.000000 |
| rad60syn       | 1.68092e-11 | 1.000000 | 1.68092e-11 | 1.000000 |
| rad60anti      | 8.20454e-12 | 1.000000 | 8.20454e-12 | 1.000000 |
| PAH3+H         | 6.66674e-12 | 1.000000 | 6.66674e-12 | 1.000000 |
| rad46          | 5.58773e-12 | 1.000000 | 5.58773e-12 | 1.000000 |
| PAH10+CH3      | 5.51346e-12 | 1.000000 | 5.51346e-12 | 1.000000 |
| rad3           | 3.95164e-12 | 1.000000 | 3.95164e-12 | 1.000000 |
| rad4           | 1.99608e-12 | 1.000000 | 1.99608e-12 | 1.000000 |
| rad59          | 1.38330e-12 | 1.000000 | 1.38330e-12 | 1.000000 |
| rad23          | 9.55820e-13 | 1.000000 | 9.55820e-13 | 1.000000 |
| PhcycC3H3_A+H  | 4.39781e-13 | 1.000000 | 4.39781e-13 | 1.000000 |
| rad43          | 2.55782e-13 | 1.000000 | 2.55782e-13 | 1.000000 |
| rad13          | 1.93906e-13 | 1.000000 | 1.93906e-13 | 1.000000 |
| rad54          | 1.44104e-13 | 1.000000 | 1.44104e-13 | 1.000000 |
| rad9           | 5.54201e-14 | 1.000000 | 5.54201e-14 | 1.000000 |
| rad62          | 5.19714e-14 | 1.000000 | 5.19714e-14 | 1.000000 |
| rad50          | 3.48551e-14 | 1.000000 | 3.48551e-14 | 1.000000 |
| rad45          | 2.03466e-14 | 1.000000 | 2.03466e-14 | 1.000000 |
| rad70          | 2.22281e-15 | 1.000000 | 2.22281e-15 | 1.000000 |
| rad36          | 1.24771e-15 | 1.000000 | 1.24771e-15 | 1.000000 |
| rad22          | 9.58819e-16 | 1.000000 | 9.58819e-16 | 1.000000 |
| rad55          | 9.09593e-16 | 1.000000 | 9.09593e-16 | 1.000000 |
| PAH1+H         | 4.32930e-16 | 1.000000 | 4.32930e-16 | 1.000000 |
| rad14          | 3.26613e-16 | 1.000000 | 3.26613e-16 | 1.000000 |
| rad33          | 3.26123e-16 | 1.000000 | 3.26123e-16 | 1.000000 |
| rad27          | 2.83927e-16 | 1.000000 | 2.83927e-16 | 1.000000 |
| rad52          | 2.14531e-16 | 1.000000 | 2.14531e-16 | 1.000000 |
| rad25          | 1.33022e-16 | 1.000000 | 1.33022e-16 | 1.000000 |
| rad58          | 7.48941e-17 | 1.000000 | 7.48941e-17 | 1.000000 |
| Phenyl+cycC3H4 | 5.25631e-17 | 1.000000 | 0.00000     | 1.000000 |
| rad51          | 5.08288e-17 | 1.000000 | 5.08288e-17 | 1.000000 |
| rad15          | 3.11756e-17 | 1.000000 | 3.11756e-17 | 1.000000 |
| rad34          | 1.96975e-17 | 1.000000 | 1.96975e-17 | 1.000000 |
| rad42          | 2.81658e-18 | 1.000000 | 2.81658e-18 | 1.000000 |
| rad41          | 2.80291e-18 | 1.000000 | 2.80291e-18 | 1.000000 |
| rad65          | 9.91801e-19 | 1.000000 | 9.91801e-19 | 1.000000 |

|                               |             |          |             |          |
|-------------------------------|-------------|----------|-------------|----------|
| rad5                          | 1.30891e-20 | 1.000000 | 1.30891e-20 | 1.000000 |
| rad31                         | 8.54831e-21 | 1.000000 | 8.54831e-21 | 1.000000 |
| rad20                         | 4.19538e-21 | 1.000000 | 4.19538e-21 | 1.000000 |
| rad21                         | 2.80407e-21 | 1.000000 | 2.80407e-21 | 1.000000 |
| rad18                         | 2.36717e-21 | 1.000000 | 2.36717e-21 | 1.000000 |
| rad12                         | 2.60508e-22 | 1.000000 | 2.60508e-22 | 1.000000 |
| rad24                         | 1.66718e-22 | 1.000000 | 1.66718e-22 | 1.000000 |
| rad19anti                     | 3.28098e-23 | 1.000000 | 3.28098e-23 | 1.000000 |
| PhcycC3H3_B+H                 | 1.99116e-24 | 1.000000 | 1.99116e-24 | 1.000000 |
| rad53                         | 1.55764e-25 | 1.000000 | 1.55764e-25 | 1.000000 |
| rad47                         | 3.62349e-26 | 1.000000 | 3.62349e-26 | 1.000000 |
| rad64                         | 1.38646e-27 | 1.000000 | 1.38646e-27 | 1.000000 |
| Benzene+cycloprop-2-enylidene | 1.33923e-30 | 1.000000 | 1.33923e-30 | 1.000000 |
| rad61                         | 1.59802e-34 | 1.000000 | 1.59802e-34 | 1.000000 |
| rad56                         | 1.17540e-35 | 1.000000 | 1.17540e-35 | 1.000000 |
| rad68syn                      | 1.21581e-37 | 1.000000 | 1.21581e-37 | 1.000000 |
| rad68anti                     | 1.02914e-37 | 1.000000 | 1.02914e-37 | 1.000000 |
| rad19syn                      | 8.38612e-41 | 1.000000 | 8.38612e-41 | 1.000000 |
| rad73                         | 2.24367e-45 | 1.000000 | 2.24367e-45 | 1.000000 |
| rad40syn                      | 1.24616e-46 | 1.000000 | 1.24616e-46 | 1.000000 |
| rad40anti                     | 9.86061e-47 | 1.000000 | 9.86061e-47 | 1.000000 |
| PAH8+H                        | 1.06997e-50 | 1.000000 | 1.06997e-50 | 1.000000 |
| rad71                         | 9.52830e-54 | 1.000000 | 9.52830e-54 | 1.000000 |
| Benzene+cycloprop-1-enylidene | 9.28861e-56 | 1.000000 | 9.28861e-56 | 1.000000 |
| rad8                          | 4.13880e-58 | 1.000000 | 4.13880e-58 | 1.000000 |

0.100000000 Pa, 40.0000000 K

=====

| Rate constant             | True (fraction)        | Effective (fraction)   |
|---------------------------|------------------------|------------------------|
| Total                     | 2.24819e-18 (1.00 )    | 2.24819e-18 (1.00 )    |
| Formation of rad19        | 2.24819e-18 (1.00 )    | 2.24819e-18 (1.00 )    |
| H-abstraction to cyc2enyl | 1.72361e-40 (7.67e-23) | 1.72361e-40 (7.67e-23) |
| H-abstraction to cyclenyl | 2.48792e-59 (1.11e-41) | 2.48792e-59 (1.11e-41) |

| species       | PYtrue      | Cumul    | PYeffective | Cumul    |
|---------------|-------------|----------|-------------|----------|
| Indene+H      | 0.999768    | 0.999768 | 0.999768    | 0.999768 |
| PhCHCCH2+H    | 0.000221123 | 0.999989 | 0.000221123 | 0.999989 |
| PhCCH+CH3     | 3.78233e-06 | 0.999993 | 3.78233e-06 | 0.999993 |
| C2H2+PhCH2    | 2.62263e-06 | 0.999996 | 2.62263e-06 | 0.999996 |
| PhCCCH3+H     | 2.15120e-06 | 0.999998 | 2.15120e-06 | 0.999998 |
| Ph+MeAc       | 1.58837e-06 | 0.999999 | 1.58837e-06 | 0.999999 |
| rad67         | 4.83974e-07 | 1.000000 | 4.83974e-07 | 1.000000 |
| rad35         | 2.14124e-07 | 1.000000 | 2.14124e-07 | 1.000000 |
| rad6          | 1.38096e-07 | 1.000000 | 1.38096e-07 | 1.000000 |
| Ph+Allene     | 1.23077e-07 | 1.000000 | 1.23077e-07 | 1.000000 |
| PAH7+H        | 1.64047e-08 | 1.000000 | 1.64047e-08 | 1.000000 |
| PhCH2CCH+H    | 1.47782e-08 | 1.000000 | 1.47782e-08 | 1.000000 |
| rad37         | 4.75679e-09 | 1.000000 | 4.75679e-09 | 1.000000 |
| rad39         | 4.61900e-09 | 1.000000 | 4.61900e-09 | 1.000000 |
| rad30         | 3.98228e-09 | 1.000000 | 3.98228e-09 | 1.000000 |
| PAH9+H        | 2.43092e-10 | 1.000000 | 2.43092e-10 | 1.000000 |
| rad28         | 1.50841e-10 | 1.000000 | 1.50841e-10 | 1.000000 |
| rad2          | 1.44719e-10 | 1.000000 | 1.44719e-10 | 1.000000 |
| rad38         | 1.03210e-10 | 1.000000 | 1.03210e-10 | 1.000000 |
| rad26         | 1.94059e-11 | 1.000000 | 1.94059e-11 | 1.000000 |
| rad7          | 1.80310e-11 | 1.000000 | 1.80310e-11 | 1.000000 |
| rad60syn      | 1.73618e-11 | 1.000000 | 1.73618e-11 | 1.000000 |
| rad10         | 9.41110e-12 | 1.000000 | 9.41110e-12 | 1.000000 |
| rad1          | 9.15655e-12 | 1.000000 | 9.15655e-12 | 1.000000 |
| rad60anti     | 8.48063e-12 | 1.000000 | 8.48063e-12 | 1.000000 |
| PAH3+H        | 6.95608e-12 | 1.000000 | 6.95608e-12 | 1.000000 |
| rad46         | 6.05773e-12 | 1.000000 | 6.05773e-12 | 1.000000 |
| PAH10+CH3     | 5.84180e-12 | 1.000000 | 5.84180e-12 | 1.000000 |
| rad11         | 5.19406e-12 | 1.000000 | 5.19406e-12 | 1.000000 |
| rad59         | 1.44123e-12 | 1.000000 | 1.44123e-12 | 1.000000 |
| rad3          | 1.19767e-12 | 1.000000 | 1.19767e-12 | 1.000000 |
| rad4          | 6.05116e-13 | 1.000000 | 6.05116e-13 | 1.000000 |
| PhcycC3H3_A+H | 4.99288e-13 | 1.000000 | 4.99288e-13 | 1.000000 |
| rad43         | 2.69996e-13 | 1.000000 | 2.69996e-13 | 1.000000 |
| rad23         | 1.71785e-13 | 1.000000 | 1.71785e-13 | 1.000000 |
| rad54         | 1.70414e-13 | 1.000000 | 1.70414e-13 | 1.000000 |
| rad13         | 6.04302e-14 | 1.000000 | 6.04302e-14 | 1.000000 |
| rad62         | 5.57773e-14 | 1.000000 | 5.57773e-14 | 1.000000 |
| rad50         | 3.88017e-14 | 1.000000 | 3.88017e-14 | 1.000000 |
| rad9          | 3.43694e-15 | 1.000000 | 3.43694e-15 | 1.000000 |
| rad45         | 3.39503e-15 | 1.000000 | 3.39503e-15 | 1.000000 |
| rad70         | 2.64854e-15 | 1.000000 | 2.64854e-15 | 1.000000 |
| rad55         | 1.11038e-15 | 1.000000 | 1.11038e-15 | 1.000000 |

|                               |             |         |             |         |
|-------------------------------|-------------|---------|-------------|---------|
| PAH1+H                        | 5.13910e-16 | 1.00000 | 5.13910e-16 | 1.00000 |
| rad52                         | 2.42749e-16 | 1.00000 | 2.42749e-16 | 1.00000 |
| rad36                         | 2.08121e-16 | 1.00000 | 2.08121e-16 | 1.00000 |
| rad22                         | 1.51025e-16 | 1.00000 | 1.51025e-16 | 1.00000 |
| Phenyl+cycC3H4                | 1.15738e-16 | 1.00000 | 0.00000     | 1.00000 |
| rad33                         | 1.04409e-16 | 1.00000 | 1.04409e-16 | 1.00000 |
| rad14                         | 9.80118e-17 | 1.00000 | 9.80118e-17 | 1.00000 |
| rad27                         | 8.70260e-17 | 1.00000 | 8.70260e-17 | 1.00000 |
| rad58                         | 8.11115e-17 | 1.00000 | 8.11115e-17 | 1.00000 |
| rad51                         | 5.85248e-17 | 1.00000 | 5.85248e-17 | 1.00000 |
| rad25                         | 4.12304e-17 | 1.00000 | 4.12304e-17 | 1.00000 |
| rad34                         | 2.44639e-17 | 1.00000 | 2.44639e-17 | 1.00000 |
| rad41                         | 3.25596e-18 | 1.00000 | 3.25596e-18 | 1.00000 |
| rad42                         | 3.22990e-18 | 1.00000 | 3.22990e-18 | 1.00000 |
| rad15                         | 1.86618e-18 | 1.00000 | 1.86618e-18 | 1.00000 |
| rad65                         | 1.15081e-18 | 1.00000 | 1.15081e-18 | 1.00000 |
| rad31                         | 2.69243e-21 | 1.00000 | 2.69243e-21 | 1.00000 |
| rad5                          | 1.65013e-21 | 1.00000 | 1.65013e-21 | 1.00000 |
| rad20                         | 9.47885e-22 | 1.00000 | 9.47885e-22 | 1.00000 |
| rad21                         | 6.41528e-22 | 1.00000 | 6.41528e-22 | 1.00000 |
| rad18                         | 3.40761e-22 | 1.00000 | 3.40761e-22 | 1.00000 |
| Benzene+cycloprop-2-enylidene | 7.66665e-23 | 1.00000 | 7.66665e-23 | 1.00000 |
| rad24                         | 2.86265e-23 | 1.00000 | 2.86265e-23 | 1.00000 |
| rad12                         | 1.61896e-23 | 1.00000 | 1.61896e-23 | 1.00000 |
| PhcycC3H3_B+H                 | 3.77343e-24 | 1.00000 | 3.77343e-24 | 1.00000 |
| rad19anti                     | 2.00937e-24 | 1.00000 | 2.00937e-24 | 1.00000 |
| rad53                         | 1.93955e-25 | 1.00000 | 1.93955e-25 | 1.00000 |
| rad47                         | 2.38483e-26 | 1.00000 | 2.38483e-26 | 1.00000 |
| rad64                         | 1.52703e-27 | 1.00000 | 1.52703e-27 | 1.00000 |
| rad61                         | 1.58999e-34 | 1.00000 | 1.58999e-34 | 1.00000 |
| rad56                         | 7.93397e-36 | 1.00000 | 7.93397e-36 | 1.00000 |
| rad68syn                      | 7.65192e-38 | 1.00000 | 7.65192e-38 | 1.00000 |
| rad68anti                     | 6.49254e-38 | 1.00000 | 6.49254e-38 | 1.00000 |
| rad19syn                      | 8.61361e-41 | 1.00000 | 8.61361e-41 | 1.00000 |
| Benzene+cycloprop-1-enylidene | 1.10663e-41 | 1.00000 | 1.10663e-41 | 1.00000 |
| rad73                         | 1.16950e-45 | 1.00000 | 1.16950e-45 | 1.00000 |
| rad40syn                      | 6.36761e-47 | 1.00000 | 6.36761e-47 | 1.00000 |
| rad40anti                     | 5.07493e-47 | 1.00000 | 5.07493e-47 | 1.00000 |
| PAH8+H                        | 4.73076e-51 | 1.00000 | 4.73076e-51 | 1.00000 |
| rad71                         | 4.01526e-54 | 1.00000 | 4.01526e-54 | 1.00000 |
| rad8                          | 1.43887e-58 | 1.00000 | 1.43887e-58 | 1.00000 |

0.100000000 Pa, 50.0000000 K

=====

| Rate constant             | True (fraction)        | Effective (fraction)   |
|---------------------------|------------------------|------------------------|
| Total                     | 1.72707e-17 (1.00 )    | 1.72707e-17 (1.00 )    |
| Formation of rad19        | 1.72707e-17 (1.00 )    | 1.72707e-17 (1.00 )    |
| H-abstraction to cyc2enyl | 5.49905e-35 (3.18e-18) | 5.49905e-35 (3.18e-18) |
| H-abstraction to cyclenyl | 4.93090e-50 (2.86e-33) | 4.93090e-50 (2.86e-33) |

| species    | PYtrue      | Cumul    | PYeffective | Cumul    |
|------------|-------------|----------|-------------|----------|
| Indene+H   | 0.999763    | 0.999763 | 0.999763    | 0.999763 |
| PhCHCCH2+H | 0.000225180 | 0.999988 | 0.000225180 | 0.999988 |
| PhCCH+CH3  | 3.87283e-06 | 0.999992 | 3.87283e-06 | 0.999992 |
| C2H2+PhCH2 | 2.71810e-06 | 0.999995 | 2.71810e-06 | 0.999995 |
| PhCCCH3+H  | 2.19974e-06 | 0.999997 | 2.19974e-06 | 0.999997 |
| Ph+MeAc    | 1.63353e-06 | 0.999999 | 1.63353e-06 | 0.999999 |
| rad67      | 4.96183e-07 | 0.999999 | 4.96183e-07 | 0.999999 |
| rad35      | 2.19306e-07 | 0.999999 | 2.19306e-07 | 0.999999 |
| Ph+Allene  | 1.31846e-07 | 0.999999 | 1.31846e-07 | 0.999999 |
| rad6       | 5.34681e-08 | 1.000000 | 5.34681e-08 | 1.000000 |
| PAH7+H     | 1.74642e-08 | 1.000000 | 1.74642e-08 | 1.000000 |
| PhCH2CCH+H | 1.59723e-08 | 1.000000 | 1.59723e-08 | 1.000000 |
| rad39      | 4.92014e-09 | 1.000000 | 4.92014e-09 | 1.000000 |
| rad37      | 4.91647e-09 | 1.000000 | 4.91647e-09 | 1.000000 |
| rad30      | 4.08724e-09 | 1.000000 | 4.08724e-09 | 1.000000 |
| PAH9+H     | 2.56118e-10 | 1.000000 | 2.56118e-10 | 1.000000 |
| rad38      | 1.08874e-10 | 1.000000 | 1.08874e-10 | 1.000000 |
| rad28      | 5.71477e-11 | 1.000000 | 5.71477e-11 | 1.000000 |
| rad2       | 5.50377e-11 | 1.000000 | 5.50377e-11 | 1.000000 |
| rad60syn   | 1.80018e-11 | 1.000000 | 1.80018e-11 | 1.000000 |
| rad60anti  | 8.80106e-12 | 1.000000 | 8.80106e-12 | 1.000000 |
| rad26      | 7.52179e-12 | 1.000000 | 7.52179e-12 | 1.000000 |
| PAH3+H     | 7.30106e-12 | 1.000000 | 7.30106e-12 | 1.000000 |
| rad7       | 6.72362e-12 | 1.000000 | 6.72362e-12 | 1.000000 |
| rad46      | 6.44616e-12 | 1.000000 | 6.44616e-12 | 1.000000 |
| PAH10+CH3  | 6.24665e-12 | 1.000000 | 6.24665e-12 | 1.000000 |
| rad10      | 3.52512e-12 | 1.000000 | 3.52512e-12 | 1.000000 |

|                               |             |          |             |          |
|-------------------------------|-------------|----------|-------------|----------|
| rad1                          | 3.48794e-12 | 1.000000 | 3.48794e-12 | 1.000000 |
| rad11                         | 1.91261e-12 | 1.000000 | 1.91261e-12 | 1.000000 |
| rad59                         | 1.51002e-12 | 1.000000 | 1.51002e-12 | 1.000000 |
| PhcycC3H3_A+H                 | 5.84117e-13 | 1.000000 | 5.84117e-13 | 1.000000 |
| rad3                          | 4.44900e-13 | 1.000000 | 4.44900e-13 | 1.000000 |
| rad43                         | 2.87047e-13 | 1.000000 | 2.87047e-13 | 1.000000 |
| rad4                          | 2.24860e-13 | 1.000000 | 2.24860e-13 | 1.000000 |
| rad54                         | 1.93150e-13 | 1.000000 | 1.93150e-13 | 1.000000 |
| rad62                         | 5.99339e-14 | 1.000000 | 5.99339e-14 | 1.000000 |
| rad23                         | 4.36370e-14 | 1.000000 | 4.36370e-14 | 1.000000 |
| rad50                         | 4.23449e-14 | 1.000000 | 4.23449e-14 | 1.000000 |
| rad13                         | 2.30234e-14 | 1.000000 | 2.30234e-14 | 1.000000 |
| rad70                         | 3.05484e-15 | 1.000000 | 3.05484e-15 | 1.000000 |
| rad55                         | 1.29740e-15 | 1.000000 | 1.29740e-15 | 1.000000 |
| rad45                         | 8.20785e-16 | 1.000000 | 8.20785e-16 | 1.000000 |
| PAH1+H                        | 6.03477e-16 | 1.000000 | 6.03477e-16 | 1.000000 |
| rad9                          | 5.28593e-16 | 1.000000 | 5.28593e-16 | 1.000000 |
| rad52                         | 2.69412e-16 | 1.000000 | 2.69412e-16 | 1.000000 |
| Phenyl+cycC3H4                | 2.36668e-16 | 1.000000 | 0.000000    | 1.000000 |
| rad58                         | 8.91424e-17 | 1.000000 | 8.91424e-17 | 1.000000 |
| rad51                         | 6.61946e-17 | 1.000000 | 6.61946e-17 | 1.000000 |
| rad36                         | 5.02947e-17 | 1.000000 | 5.02947e-17 | 1.000000 |
| rad33                         | 4.04246e-17 | 1.000000 | 4.04246e-17 | 1.000000 |
| rad14                         | 3.63004e-17 | 1.000000 | 3.63004e-17 | 1.000000 |
| rad22                         | 3.54966e-17 | 1.000000 | 3.54966e-17 | 1.000000 |
| rad27                         | 3.26426e-17 | 1.000000 | 3.26426e-17 | 1.000000 |
| rad34                         | 2.94881e-17 | 1.000000 | 2.94881e-17 | 1.000000 |
| rad25                         | 1.56648e-17 | 1.000000 | 1.56648e-17 | 1.000000 |
| rad41                         | 3.90229e-18 | 1.000000 | 3.90229e-18 | 1.000000 |
| rad42                         | 3.77954e-18 | 1.000000 | 3.77954e-18 | 1.000000 |
| Benzene+cycloprop-2-enylidene | 3.18404e-18 | 1.000000 | 3.18404e-18 | 1.000000 |
| rad65                         | 1.31337e-18 | 1.000000 | 1.31337e-18 | 1.000000 |
| rad15                         | 2.80471e-19 | 1.000000 | 2.80471e-19 | 1.000000 |
| rad31                         | 1.03131e-21 | 1.000000 | 1.03131e-21 | 1.000000 |
| rad5                          | 3.37903e-22 | 1.000000 | 3.37903e-22 | 1.000000 |
| PhcycC3H3_B+H                 | 3.05129e-22 | 1.000000 | 3.05129e-22 | 1.000000 |
| rad20                         | 3.03238e-22 | 1.000000 | 3.03238e-22 | 1.000000 |
| rad21                         | 2.07188e-22 | 1.000000 | 2.07188e-22 | 1.000000 |
| rad18                         | 7.95250e-23 | 1.000000 | 7.95250e-23 | 1.000000 |
| rad24                         | 7.08773e-24 | 1.000000 | 7.08773e-24 | 1.000000 |
| rad12                         | 2.49786e-24 | 1.000000 | 2.49786e-24 | 1.000000 |
| rad53                         | 3.62544e-25 | 1.000000 | 3.62544e-25 | 1.000000 |
| rad19anti                     | 3.07702e-25 | 1.000000 | 3.07702e-25 | 1.000000 |
| rad47                         | 1.76285e-26 | 1.000000 | 1.76285e-26 | 1.000000 |
| rad64                         | 2.64287e-27 | 1.000000 | 2.64287e-27 | 1.000000 |
| Benzene+cycloprop-1-enylidene | 2.85507e-33 | 1.000000 | 2.85507e-33 | 1.000000 |
| rad61                         | 3.22439e-34 | 1.000000 | 3.22439e-34 | 1.000000 |
| rad56                         | 1.08084e-35 | 1.000000 | 1.08084e-35 | 1.000000 |
| rad68syn                      | 1.01305e-37 | 1.000000 | 1.01305e-37 | 1.000000 |
| rad68anti                     | 8.60402e-38 | 1.000000 | 8.60402e-38 | 1.000000 |
| rad19syn                      | 1.15715e-40 | 1.000000 | 1.15715e-40 | 1.000000 |
| rad73                         | 1.44785e-45 | 1.000000 | 1.44785e-45 | 1.000000 |
| rad40syn                      | 9.08201e-47 | 1.000000 | 9.08201e-47 | 1.000000 |
| rad40anti                     | 7.28688e-47 | 1.000000 | 7.28688e-47 | 1.000000 |
| PAH8+H                        | 6.18186e-51 | 1.000000 | 6.18186e-51 | 1.000000 |
| rad71                         | 4.73007e-54 | 1.000000 | 4.73007e-54 | 1.000000 |
| rad8                          | 6.65510e-59 | 1.000000 | 6.65510e-59 | 1.000000 |

0.100000000 Pa, 60.0000000 K

=====

| Rate constant             | True (fraction)        | Effective (fraction)   |
|---------------------------|------------------------|------------------------|
| Total                     | 6.93738e-17 (1.00 )    | 6.93738e-17 (1.00 )    |
| Formation of rad19        | 6.93738e-17 (1.000 )   | 6.93738e-17 (1.000 )   |
| H-abstraction to cyc2enyl | 2.50609e-31 (3.61e-15) | 2.50609e-31 (3.61e-15) |
| H-abstraction to cyclenyl | 7.62015e-44 (1.10e-27) | 7.62015e-44 (1.10e-27) |

  

| species    | PYtrue      | Cumul    | PYeffective | Cumul    |
|------------|-------------|----------|-------------|----------|
| Indene+H   | 0.999759    | 0.999759 | 0.999759    | 0.999759 |
| PhCHCCH2+H | 0.000229730 | 0.999989 | 0.000229730 | 0.999989 |
| PhCCH+CH3  | 3.96586e-06 | 0.999993 | 3.96586e-06 | 0.999993 |
| C2H2+PhCH2 | 2.80762e-06 | 0.999996 | 2.80762e-06 | 0.999996 |
| PhCCCH3+H  | 2.25336e-06 | 0.999998 | 2.25336e-06 | 0.999998 |
| Ph+MeAc    | 1.68314e-06 | 0.999999 | 1.68314e-06 | 0.999999 |
| rad67      | 5.10001e-07 | 1.000000 | 5.10001e-07 | 1.000000 |
| rad35      | 2.25162e-07 | 1.000000 | 2.25162e-07 | 1.000000 |
| Ph+Allene  | 1.39790e-07 | 1.000000 | 1.39790e-07 | 1.000000 |
| rad6       | 2.35731e-08 | 1.000000 | 2.35731e-08 | 1.000000 |
| PAH7+H     | 1.83908e-08 | 1.000000 | 1.83908e-08 | 1.000000 |

|                               |             |         |             |         |
|-------------------------------|-------------|---------|-------------|---------|
| PhCH2CCH+H                    | 1.70803e-08 | 1.00000 | 1.70803e-08 | 1.00000 |
| rad39                         | 5.18322e-09 | 1.00000 | 5.18322e-09 | 1.00000 |
| rad37                         | 5.09584e-09 | 1.00000 | 5.09584e-09 | 1.00000 |
| rad30                         | 4.20254e-09 | 1.00000 | 4.20254e-09 | 1.00000 |
| PAH9+H                        | 2.68375e-10 | 1.00000 | 2.68375e-10 | 1.00000 |
| rad38                         | 1.14352e-10 | 1.00000 | 1.14352e-10 | 1.00000 |
| rad28                         | 2.47958e-11 | 1.00000 | 2.47958e-11 | 1.00000 |
| rad2                          | 2.38945e-11 | 1.00000 | 2.38945e-11 | 1.00000 |
| rad60syn                      | 1.87147e-11 | 1.00000 | 1.87147e-11 | 1.00000 |
| rad60anti                     | 9.15849e-12 | 1.00000 | 9.15849e-12 | 1.00000 |
| PAH3+H                        | 7.69268e-12 | 1.00000 | 7.69268e-12 | 1.00000 |
| rad46                         | 6.81644e-12 | 1.00000 | 6.81644e-12 | 1.00000 |
| PAH10+CH3                     | 6.71912e-12 | 1.00000 | 6.71912e-12 | 1.00000 |
| rad26                         | 3.31297e-12 | 1.00000 | 3.31297e-12 | 1.00000 |
| rad7                          | 2.88345e-12 | 1.00000 | 2.88345e-12 | 1.00000 |
| rad59                         | 1.58789e-12 | 1.00000 | 1.58789e-12 | 1.00000 |
| rad1                          | 1.51733e-12 | 1.00000 | 1.51733e-12 | 1.00000 |
| rad10                         | 1.51337e-12 | 1.00000 | 1.51337e-12 | 1.00000 |
| rad11                         | 8.12753e-13 | 1.00000 | 8.12753e-13 | 1.00000 |
| PhcycC3H3_A+H                 | 6.94064e-13 | 1.00000 | 6.94064e-13 | 1.00000 |
| rad43                         | 3.06598e-13 | 1.00000 | 3.06598e-13 | 1.00000 |
| rad54                         | 2.15374e-13 | 1.00000 | 2.15374e-13 | 1.00000 |
| rad3                          | 1.89917e-13 | 1.00000 | 1.89917e-13 | 1.00000 |
| rad4                          | 9.60290e-14 | 1.00000 | 9.60290e-14 | 1.00000 |
| rad62                         | 6.45206e-14 | 1.00000 | 6.45206e-14 | 1.00000 |
| rad50                         | 4.58867e-14 | 1.00000 | 4.58867e-14 | 1.00000 |
| rad23                         | 1.37997e-14 | 1.00000 | 1.37997e-14 | 1.00000 |
| rad13                         | 1.00512e-14 | 1.00000 | 1.00512e-14 | 1.00000 |
| Benzene+cycloprop-2-enylidene | 3.61245e-15 | 1.00000 | 3.61245e-15 | 1.00000 |
| rad70                         | 3.48012e-15 | 1.00000 | 3.48012e-15 | 1.00000 |
| rad55                         | 1.49028e-15 | 1.00000 | 1.49028e-15 | 1.00000 |
| PAH1+H                        | 7.06643e-16 | 1.00000 | 7.06643e-16 | 1.00000 |
| Phenyl+cycC3H4                | 4.45921e-16 | 1.00000 | 0.00000     | 1.00000 |
| rad52                         | 2.96971e-16 | 1.00000 | 2.96971e-16 | 1.00000 |
| rad45                         | 2.50252e-16 | 1.00000 | 2.50252e-16 | 1.00000 |
| rad9                          | 1.31561e-16 | 1.00000 | 1.31561e-16 | 1.00000 |
| rad58                         | 9.88477e-17 | 1.00000 | 9.88477e-17 | 1.00000 |
| rad51                         | 7.44217e-17 | 1.00000 | 7.44217e-17 | 1.00000 |
| rad34                         | 3.51336e-17 | 1.00000 | 3.51336e-17 | 1.00000 |
| rad33                         | 1.78439e-17 | 1.00000 | 1.78439e-17 | 1.00000 |
| rad14                         | 1.54953e-17 | 1.00000 | 1.54953e-17 | 1.00000 |
| rad36                         | 1.53284e-17 | 1.00000 | 1.53284e-17 | 1.00000 |
| rad27                         | 1.40540e-17 | 1.00000 | 1.40540e-17 | 1.00000 |
| rad22                         | 1.06520e-17 | 1.00000 | 1.06520e-17 | 1.00000 |
| rad25                         | 6.82758e-18 | 1.00000 | 6.82758e-18 | 1.00000 |
| rad41                         | 4.75067e-18 | 1.00000 | 4.75067e-18 | 1.00000 |
| rad42                         | 4.48157e-18 | 1.00000 | 4.48157e-18 | 1.00000 |
| rad65                         | 1.49086e-18 | 1.00000 | 1.49086e-18 | 1.00000 |
| rad15                         | 6.86489e-20 | 1.00000 | 6.86489e-20 | 1.00000 |
| PhcycC3H3_B+H                 | 1.47227e-20 | 1.00000 | 1.47227e-20 | 1.00000 |
| rad31                         | 4.52680e-22 | 1.00000 | 4.52680e-22 | 1.00000 |
| rad20                         | 1.19466e-22 | 1.00000 | 1.19466e-22 | 1.00000 |
| rad5                          | 9.27934e-23 | 1.00000 | 9.27934e-23 | 1.00000 |
| rad21                         | 8.22560e-23 | 1.00000 | 8.22560e-23 | 1.00000 |
| rad18                         | 2.46191e-23 | 1.00000 | 2.46191e-23 | 1.00000 |
| rad24                         | 2.20641e-24 | 1.00000 | 2.20641e-24 | 1.00000 |
| rad53                         | 1.22189e-24 | 1.00000 | 1.22189e-24 | 1.00000 |
| rad12                         | 6.24167e-25 | 1.00000 | 6.24167e-25 | 1.00000 |
| rad19anti                     | 7.65469e-26 | 1.00000 | 7.65469e-26 | 1.00000 |
| rad47                         | 1.40031e-26 | 1.00000 | 1.40031e-26 | 1.00000 |
| rad64                         | 7.97693e-27 | 1.00000 | 7.97693e-27 | 1.00000 |
| Benzene+cycloprop-1-enylidene | 1.09842e-27 | 1.00000 | 1.09842e-27 | 1.00000 |
| rad61                         | 1.33213e-33 | 1.00000 | 1.33213e-33 | 1.00000 |
| rad56                         | 2.78703e-35 | 1.00000 | 2.78703e-35 | 1.00000 |
| rad68syn                      | 2.59689e-37 | 1.00000 | 2.59689e-37 | 1.00000 |
| rad68anti                     | 2.20611e-37 | 1.00000 | 2.20611e-37 | 1.00000 |
| rad19syn                      | 1.80508e-40 | 1.00000 | 1.80508e-40 | 1.00000 |
| rad73                         | 3.71323e-45 | 1.00000 | 3.71323e-45 | 1.00000 |
| rad40syn                      | 3.28284e-46 | 1.00000 | 3.28284e-46 | 1.00000 |
| rad40anti                     | 2.65407e-46 | 1.00000 | 2.65407e-46 | 1.00000 |
| PAH8+H                        | 2.10697e-50 | 1.00000 | 2.10697e-50 | 1.00000 |
| rad71                         | 1.27044e-53 | 1.00000 | 1.27044e-53 | 1.00000 |
| rad8                          | 3.74141e-59 | 1.00000 | 3.74141e-59 | 1.00000 |

0.100000000 Pa, 70.0000000 K

| Rate constant      | True (fraction)      | Effective (fraction) |
|--------------------|----------------------|----------------------|
| Total              | 1.91520e-16 (1.00 )  | 1.91520e-16 (1.00 )  |
| Formation of rad19 | 1.91520e-16 (1.000 ) | 1.91520e-16 (1.000 ) |

H-abstraction to cyc2enyl | 1.01125e-28 (5.28e-13) 1.01125e-28 (5.28e-13)  
H-abstraction to cyc1enyl | 1.97822e-39 (1.03e-23) 1.97822e-39 (1.03e-23)

| species                       | PYtrue      | Cumul    | PYeffective | Cumul    |
|-------------------------------|-------------|----------|-------------|----------|
| Indene+H                      | 0.999753    | 0.999753 | 0.999753    | 0.999753 |
| PhCHCCH2+H                    | 0.000234673 | 0.999988 | 0.000234673 | 0.999988 |
| PhCCH+CH3                     | 4.06344e-06 | 0.999992 | 4.06344e-06 | 0.999992 |
| C2H2+PhCH2                    | 2.89770e-06 | 0.999995 | 2.89770e-06 | 0.999995 |
| PhCCCH3+H                     | 2.31150e-06 | 0.999997 | 2.31150e-06 | 0.999997 |
| Ph+MeAc                       | 1.73691e-06 | 0.999999 | 1.73691e-06 | 0.999999 |
| rad67                         | 5.25148e-07 | 0.999999 | 5.25148e-07 | 0.999999 |
| rad35                         | 2.31573e-07 | 0.999999 | 2.31573e-07 | 0.999999 |
| Ph+Allene                     | 1.47594e-07 | 1.000000 | 1.47594e-07 | 1.000000 |
| PAH7+H                        | 1.92821e-08 | 1.000000 | 1.92821e-08 | 1.000000 |
| PhCH2CCH+H                    | 1.81859e-08 | 1.000000 | 1.81859e-08 | 1.000000 |
| rad6                          | 1.14375e-08 | 1.000000 | 1.14375e-08 | 1.000000 |
| rad39                         | 5.43602e-09 | 1.000000 | 5.43602e-09 | 1.000000 |
| rad37                         | 5.29296e-09 | 1.000000 | 5.29296e-09 | 1.000000 |
| rad30                         | 4.32739e-09 | 1.000000 | 4.32739e-09 | 1.000000 |
| PAH9+H                        | 2.80705e-10 | 1.000000 | 2.80705e-10 | 1.000000 |
| rad38                         | 1.19960e-10 | 1.000000 | 1.19960e-10 | 1.000000 |
| rad60syn                      | 1.94968e-11 | 1.000000 | 1.94968e-11 | 1.000000 |
| rad28                         | 1.18813e-11 | 1.000000 | 1.18813e-11 | 1.000000 |
| rad2                          | 1.14393e-11 | 1.000000 | 1.14393e-11 | 1.000000 |
| rad60anti                     | 9.55105e-12 | 1.000000 | 9.55105e-12 | 1.000000 |
| PAH3+H                        | 8.12978e-12 | 1.000000 | 8.12978e-12 | 1.000000 |
| PAH10+CH3                     | 7.26053e-12 | 1.000000 | 7.26053e-12 | 1.000000 |
| rad46                         | 7.19199e-12 | 1.000000 | 7.19199e-12 | 1.000000 |
| rad59                         | 1.67455e-12 | 1.000000 | 1.67455e-12 | 1.000000 |
| rad26                         | 1.60444e-12 | 1.000000 | 1.60444e-12 | 1.000000 |
| rad7                          | 1.36907e-12 | 1.000000 | 1.36907e-12 | 1.000000 |
| PhcycC3H3_A+H                 | 8.33379e-13 | 1.000000 | 8.33379e-13 | 1.000000 |
| rad1                          | 7.28107e-13 | 1.000000 | 7.28107e-13 | 1.000000 |
| rad10                         | 7.18184e-13 | 1.000000 | 7.18184e-13 | 1.000000 |
| Benzene+cycloprop-2-enylidene | 5.28015e-13 | 1.000000 | 5.28015e-13 | 1.000000 |
| rad11                         | 3.83169e-13 | 1.000000 | 3.83169e-13 | 1.000000 |
| rad43                         | 3.28677e-13 | 1.000000 | 3.28677e-13 | 1.000000 |
| rad54                         | 2.38479e-13 | 1.000000 | 2.38479e-13 | 1.000000 |
| rad3                          | 8.97513e-14 | 1.000000 | 8.97513e-14 | 1.000000 |
| rad62                         | 6.96062e-14 | 1.000000 | 6.96062e-14 | 1.000000 |
| rad50                         | 4.96051e-14 | 1.000000 | 4.96051e-14 | 1.000000 |
| rad4                          | 4.54052e-14 | 1.000000 | 4.54052e-14 | 1.000000 |
| rad23                         | 5.08738e-15 | 1.000000 | 5.08738e-15 | 1.000000 |
| rad13                         | 4.84604e-15 | 1.000000 | 4.84604e-15 | 1.000000 |
| rad70                         | 3.94578e-15 | 1.000000 | 3.94578e-15 | 1.000000 |
| rad55                         | 1.69959e-15 | 1.000000 | 1.69959e-15 | 1.000000 |
| PAH1+H                        | 8.27946e-16 | 1.000000 | 8.27946e-16 | 1.000000 |
| Phenyl+cycC3H4                | 7.87809e-16 | 1.000000 | 0.000000    | 1.000000 |
| rad52                         | 3.26676e-16 | 1.000000 | 3.26676e-16 | 1.000000 |
| rad58                         | 1.10364e-16 | 1.000000 | 1.10364e-16 | 1.000000 |
| rad45                         | 8.96524e-17 | 1.000000 | 8.96524e-17 | 1.000000 |
| rad51                         | 8.35621e-17 | 1.000000 | 8.35621e-17 | 1.000000 |
| rad9                          | 4.42515e-17 | 1.000000 | 4.42515e-17 | 1.000000 |
| rad34                         | 4.16950e-17 | 1.000000 | 4.16950e-17 | 1.000000 |
| rad33                         | 8.67443e-18 | 1.000000 | 8.67443e-18 | 1.000000 |
| rad14                         | 7.33331e-18 | 1.000000 | 7.33331e-18 | 1.000000 |
| rad27                         | 6.69297e-18 | 1.000000 | 6.69297e-18 | 1.000000 |
| rad41                         | 5.83258e-18 | 1.000000 | 5.83258e-18 | 1.000000 |
| rad36                         | 5.48964e-18 | 1.000000 | 5.48964e-18 | 1.000000 |
| rad42                         | 5.36210e-18 | 1.000000 | 5.36210e-18 | 1.000000 |
| rad22                         | 3.77881e-18 | 1.000000 | 3.77881e-18 | 1.000000 |
| rad25                         | 3.28850e-18 | 1.000000 | 3.28850e-18 | 1.000000 |
| rad65                         | 1.69092e-18 | 1.000000 | 1.69092e-18 | 1.000000 |
| PhcycC3H3_B+H                 | 2.38394e-19 | 1.000000 | 2.38394e-19 | 1.000000 |
| rad15                         | 2.27947e-20 | 1.000000 | 2.27947e-20 | 1.000000 |
| rad31                         | 2.19782e-22 | 1.000000 | 2.19782e-22 | 1.000000 |
| rad20                         | 5.42037e-23 | 1.000000 | 5.42037e-23 | 1.000000 |
| rad21                         | 3.75655e-23 | 1.000000 | 3.75655e-23 | 1.000000 |
| rad5                          | 3.10873e-23 | 1.000000 | 3.10873e-23 | 1.000000 |
| Benzene+cycloprop-1-enylidene | 1.03290e-23 | 1.000000 | 1.03290e-23 | 1.000000 |
| rad18                         | 9.19677e-24 | 1.000000 | 9.19677e-24 | 1.000000 |
| rad53                         | 7.37867e-24 | 1.000000 | 7.37867e-24 | 1.000000 |
| rad24                         | 8.05352e-25 | 1.000000 | 8.05352e-25 | 1.000000 |
| rad12                         | 2.10911e-25 | 1.000000 | 2.10911e-25 | 1.000000 |
| rad64                         | 5.78102e-26 | 1.000000 | 5.78102e-26 | 1.000000 |
| rad19anti                     | 2.57935e-26 | 1.000000 | 2.57935e-26 | 1.000000 |
| rad47                         | 1.16857e-26 | 1.000000 | 1.16857e-26 | 1.000000 |
| rad61                         | 6.91166e-32 | 1.000000 | 6.91166e-32 | 1.000000 |
| rad56                         | 2.11405e-34 | 1.000000 | 2.11405e-34 | 1.000000 |

|           |             |          |             |          |
|-----------|-------------|----------|-------------|----------|
| rad68syn  | 1.81229e-36 | 1.000000 | 1.81229e-36 | 1.000000 |
| rad68anti | 1.53920e-36 | 1.000000 | 1.53920e-36 | 1.000000 |
| rad19syn  | 3.07655e-40 | 1.000000 | 3.07655e-40 | 1.000000 |
| rad73     | 2.72780e-44 | 1.000000 | 2.72780e-44 | 1.000000 |
| rad40syn  | 3.95640e-45 | 1.000000 | 3.95640e-45 | 1.000000 |
| rad40anti | 3.21633e-45 | 1.000000 | 3.21633e-45 | 1.000000 |
| PAH8+H    | 2.57580e-49 | 1.000000 | 2.57580e-49 | 1.000000 |
| rad71     | 1.06798e-52 | 1.000000 | 1.06798e-52 | 1.000000 |
| rad8      | 2.43263e-59 | 1.000000 | 2.43263e-59 | 1.000000 |

0.100000000 Pa, 80.0000000 K

| Rate constant             | True (fraction)        | Effective (fraction)   |
|---------------------------|------------------------|------------------------|
| Total                     | 4.17084e-16 (1.00 )    | 4.17084e-16 (1.00 )    |
| Formation of rad19        | 4.17084e-16 (1.000 )   | 4.17084e-16 (1.000 )   |
| H-abstraction to cyc2enyl | 8.98751e-27 (2.15e-11) | 8.98751e-27 (2.15e-11) |
| H-abstraction to cyclenyl | 4.00120e-36 (9.59e-21) | 4.00120e-36 (9.59e-21) |

| species                       | PYtrue      | Cumul    | PYeffective | Cumul    |
|-------------------------------|-------------|----------|-------------|----------|
| Indene+H                      | 0.999748    | 0.999748 | 0.999748    | 0.999748 |
| PhCHCCH2+H                    | 0.000239986 | 0.999988 | 0.000239986 | 0.999988 |
| PhCCH+CH3                     | 4.16656e-06 | 0.999992 | 4.16656e-06 | 0.999992 |
| C2H2+PhCH2                    | 2.99115e-06 | 0.999995 | 2.99115e-06 | 0.999995 |
| PhCCCH3+H                     | 2.37408e-06 | 0.999998 | 2.37408e-06 | 0.999998 |
| Ph+MeAc                       | 1.79495e-06 | 0.999999 | 1.79495e-06 | 0.999999 |
| rad67                         | 5.41576e-07 | 1.000000 | 5.41576e-07 | 1.000000 |
| rad35                         | 2.38517e-07 | 1.000000 | 2.38517e-07 | 1.000000 |
| Ph+Allene                     | 1.55596e-07 | 1.000000 | 1.55596e-07 | 1.000000 |
| PAH7+H                        | 2.01828e-08 | 1.000000 | 2.01828e-08 | 1.000000 |
| PhCH2CCH+H                    | 1.93333e-08 | 1.000000 | 1.93333e-08 | 1.000000 |
| rad6                          | 5.97272e-09 | 1.000000 | 5.97272e-09 | 1.000000 |
| rad39                         | 5.69126e-09 | 1.000000 | 5.69126e-09 | 1.000000 |
| rad37                         | 5.50814e-09 | 1.000000 | 5.50814e-09 | 1.000000 |
| rad30                         | 4.46201e-09 | 1.000000 | 4.46201e-09 | 1.000000 |
| PAH9+H                        | 2.93527e-10 | 1.000000 | 2.93527e-10 | 1.000000 |
| rad38                         | 1.25865e-10 | 1.000000 | 1.25865e-10 | 1.000000 |
| Benzene+cycloprop-2-enylidene | 2.15484e-11 | 1.000000 | 2.15484e-11 | 1.000000 |
| rad60syn                      | 2.03513e-11 | 1.000000 | 2.03513e-11 | 1.000000 |
| rad60anti                     | 9.98055e-12 | 1.000000 | 9.98055e-12 | 1.000000 |
| PAH3+H                        | 8.61588e-12 | 1.000000 | 8.61588e-12 | 1.000000 |
| PAH10+CH3                     | 7.87863e-12 | 1.000000 | 7.87863e-12 | 1.000000 |
| rad46                         | 7.58538e-12 | 1.000000 | 7.58538e-12 | 1.000000 |
| rad28                         | 6.14172e-12 | 1.000000 | 6.14172e-12 | 1.000000 |
| rad2                          | 5.90361e-12 | 1.000000 | 5.90361e-12 | 1.000000 |
| rad59                         | 1.77066e-12 | 1.000000 | 1.77066e-12 | 1.000000 |
| PhcycC3H3_A+H                 | 1.00912e-12 | 1.000000 | 1.00912e-12 | 1.000000 |
| rad26                         | 8.35980e-13 | 1.000000 | 8.35980e-13 | 1.000000 |
| rad7                          | 7.02442e-13 | 1.000000 | 7.02442e-13 | 1.000000 |
| rad1                          | 3.76756e-13 | 1.000000 | 3.76756e-13 | 1.000000 |
| rad10                         | 3.68007e-13 | 1.000000 | 3.68007e-13 | 1.000000 |
| rad43                         | 3.53544e-13 | 1.000000 | 3.53544e-13 | 1.000000 |
| rad54                         | 2.63380e-13 | 1.000000 | 2.63380e-13 | 1.000000 |
| rad11                         | 1.95473e-13 | 1.000000 | 1.95473e-13 | 1.000000 |
| rad62                         | 7.52787e-14 | 1.000000 | 7.52787e-14 | 1.000000 |
| rad50                         | 5.36189e-14 | 1.000000 | 5.36189e-14 | 1.000000 |
| rad3                          | 4.58422e-14 | 1.000000 | 4.58422e-14 | 1.000000 |
| rad4                          | 2.32057e-14 | 1.000000 | 2.32057e-14 | 1.000000 |
| rad70                         | 4.46969e-15 | 1.000000 | 4.46969e-15 | 1.000000 |
| rad13                         | 2.52024e-15 | 1.000000 | 2.52024e-15 | 1.000000 |
| rad23                         | 2.10192e-15 | 1.000000 | 2.10192e-15 | 1.000000 |
| rad55                         | 1.93380e-15 | 1.000000 | 1.93380e-15 | 1.000000 |
| Phenyl+cycC3H4                | 1.32430e-15 | 1.000000 | 0.000000    | 1.000000 |
| PAH1+H                        | 9.72793e-16 | 1.000000 | 9.72793e-16 | 1.000000 |
| rad52                         | 3.59502e-16 | 1.000000 | 3.59502e-16 | 1.000000 |
| rad58                         | 1.24000e-16 | 1.000000 | 1.24000e-16 | 1.000000 |
| rad51                         | 9.39442e-17 | 1.000000 | 9.39442e-17 | 1.000000 |
| rad34                         | 4.94924e-17 | 1.000000 | 4.94924e-17 | 1.000000 |
| rad45                         | 3.61861e-17 | 1.000000 | 3.61861e-17 | 1.000000 |
| rad9                          | 1.83183e-17 | 1.000000 | 1.83183e-17 | 1.000000 |
| rad41                         | 7.20381e-18 | 1.000000 | 7.20381e-18 | 1.000000 |
| rad42                         | 6.46195e-18 | 1.000000 | 6.46195e-18 | 1.000000 |
| rad33                         | 4.54086e-18 | 1.000000 | 4.54086e-18 | 1.000000 |
| rad14                         | 3.75408e-18 | 1.000000 | 3.75408e-18 | 1.000000 |
| rad27                         | 3.44280e-18 | 1.000000 | 3.44280e-18 | 1.000000 |
| rad36                         | 2.21534e-18 | 1.000000 | 2.21534e-18 | 1.000000 |
| PhcycC3H3_B+H                 | 1.96149e-18 | 1.000000 | 1.96149e-18 | 1.000000 |
| rad65                         | 1.92113e-18 | 1.000000 | 1.92113e-18 | 1.000000 |
| rad25                         | 1.70914e-18 | 1.000000 | 1.70914e-18 | 1.000000 |

|                               |             |         |             |         |
|-------------------------------|-------------|---------|-------------|---------|
| rad22                         | 1.51541e-18 | 1.00000 | 1.51541e-18 | 1.00000 |
| Benzene+cycloprop-1-enylidene | 9.59328e-21 | 1.00000 | 9.59328e-21 | 1.00000 |
| rad15                         | 9.33888e-21 | 1.00000 | 9.33888e-21 | 1.00000 |
| rad31                         | 1.15340e-22 | 1.00000 | 1.15340e-22 | 1.00000 |
| rad53                         | 4.33160e-23 | 1.00000 | 4.33160e-23 | 1.00000 |
| rad20                         | 2.72561e-23 | 1.00000 | 2.72561e-23 | 1.00000 |
| rad21                         | 1.89983e-23 | 1.00000 | 1.89983e-23 | 1.00000 |
| rad5                          | 1.20302e-23 | 1.00000 | 1.20302e-23 | 1.00000 |
| rad18                         | 3.93081e-24 | 1.00000 | 3.93081e-24 | 1.00000 |
| rad64                         | 5.66267e-25 | 1.00000 | 5.66267e-25 | 1.00000 |
| rad24                         | 3.30686e-25 | 1.00000 | 3.30686e-25 | 1.00000 |
| rad12                         | 8.77566e-26 | 1.00000 | 8.77566e-26 | 1.00000 |
| rad19anti                     | 1.07143e-26 | 1.00000 | 1.07143e-26 | 1.00000 |
| rad47                         | 1.01114e-26 | 1.00000 | 1.01114e-26 | 1.00000 |
| rad61                         | 8.61596e-30 | 1.00000 | 8.61596e-30 | 1.00000 |
| rad56                         | 1.69801e-32 | 1.00000 | 1.69801e-32 | 1.00000 |
| rad68syn                      | 2.35853e-34 | 1.00000 | 2.35853e-34 | 1.00000 |
| rad68anti                     | 1.98578e-34 | 1.00000 | 1.98578e-34 | 1.00000 |
| rad19syn                      | 5.56519e-40 | 1.00000 | 5.56519e-40 | 1.00000 |
| rad73                         | 1.38014e-42 | 1.00000 | 1.38014e-42 | 1.00000 |
| rad40syn                      | 2.57618e-43 | 1.00000 | 2.57618e-43 | 1.00000 |
| rad40anti                     | 2.09419e-43 | 1.00000 | 2.09419e-43 | 1.00000 |
| PAH8+H                        | 1.86610e-47 | 1.00000 | 1.86610e-47 | 1.00000 |
| rad71                         | 6.38736e-51 | 1.00000 | 6.38736e-51 | 1.00000 |
| rad8                          | 1.77645e-59 | 1.00000 | 1.77645e-59 | 1.00000 |

0.100000000 Pa, 90.0000000 K

| Rate constant             | True (fraction)        | Effective (fraction)   |
|---------------------------|------------------------|------------------------|
| Total                     | 7.74016e-16 (1.00 )    | 7.74016e-16 (1.00 )    |
| Formation of rad19        | 7.74016e-16 (1.000 )   | 7.74016e-16 (1.000 )   |
| H-abstraction to cyc2enyl | 2.91736e-25 (3.77e-10) | 2.91736e-25 (3.77e-10) |
| H-abstraction to cyclenyl | 1.47814e-33 (1.91e-18) | 1.47814e-33 (1.91e-18) |

| species                       | PYtrue      | Cumul    | PYeffective | Cumul    |
|-------------------------------|-------------|----------|-------------|----------|
| Indene+H                      | 0.999742    | 0.999742 | 0.999742    | 0.999742 |
| PhCHCCH2+H                    | 0.000245673 | 0.999988 | 0.000245673 | 0.999988 |
| PhCCH+CH3                     | 4.27592e-06 | 0.999992 | 4.27592e-06 | 0.999992 |
| C2H2+PhCH2                    | 3.08955e-06 | 0.999995 | 3.08955e-06 | 0.999995 |
| PhCCCH3+H                     | 2.44127e-06 | 0.999997 | 2.44127e-06 | 0.999997 |
| Ph+MeAc                       | 1.85753e-06 | 0.999999 | 1.85753e-06 | 0.999999 |
| rad67                         | 5.59329e-07 | 1.000000 | 5.59329e-07 | 1.000000 |
| rad35                         | 2.46011e-07 | 1.000000 | 2.46011e-07 | 1.000000 |
| Ph+Allene                     | 1.64006e-07 | 1.000000 | 1.64006e-07 | 1.000000 |
| PAH7+H                        | 2.11183e-08 | 1.000000 | 2.11183e-08 | 1.000000 |
| PhCH2CCH+H                    | 2.05520e-08 | 1.000000 | 2.05520e-08 | 1.000000 |
| rad39                         | 5.95618e-09 | 1.000000 | 5.95618e-09 | 1.000000 |
| rad37                         | 5.74264e-09 | 1.000000 | 5.74264e-09 | 1.000000 |
| rad30                         | 4.60703e-09 | 1.000000 | 4.60703e-09 | 1.000000 |
| rad6                          | 3.30584e-09 | 1.000000 | 3.30584e-09 | 1.000000 |
| Benzene+cycloprop-2-enylidene | 3.76912e-10 | 1.000000 | 3.76912e-10 | 1.000000 |
| PAH9+H                        | 3.07108e-10 | 1.000000 | 3.07108e-10 | 1.000000 |
| rad38                         | 1.32181e-10 | 1.000000 | 1.32181e-10 | 1.000000 |
| rad60syn                      | 2.12851e-11 | 1.000000 | 2.12851e-11 | 1.000000 |
| rad60anti                     | 1.04504e-11 | 1.000000 | 1.04504e-11 | 1.000000 |
| PAH3+H                        | 9.15671e-12 | 1.000000 | 9.15671e-12 | 1.000000 |
| PAH10+CH3                     | 8.58494e-12 | 1.000000 | 8.58494e-12 | 1.000000 |
| rad46                         | 8.00521e-12 | 1.000000 | 8.00521e-12 | 1.000000 |
| rad28                         | 3.37055e-12 | 1.000000 | 3.37055e-12 | 1.000000 |
| rad2                          | 3.23341e-12 | 1.000000 | 3.23341e-12 | 1.000000 |
| rad59                         | 1.87728e-12 | 1.000000 | 1.87728e-12 | 1.000000 |
| PhcycC3H3_A+H                 | 1.23098e-12 | 1.000000 | 1.23098e-12 | 1.000000 |
| rad26                         | 4.61605e-13 | 1.000000 | 4.61605e-13 | 1.000000 |
| rad7                          | 3.83089e-13 | 1.000000 | 3.83089e-13 | 1.000000 |
| rad43                         | 3.81581e-13 | 1.000000 | 3.81581e-13 | 1.000000 |
| rad54                         | 2.90828e-13 | 1.000000 | 2.90828e-13 | 1.000000 |
| rad1                          | 2.06954e-13 | 1.000000 | 2.06954e-13 | 1.000000 |
| rad10                         | 2.00358e-13 | 1.000000 | 2.00358e-13 | 1.000000 |
| rad11                         | 1.06098e-13 | 1.000000 | 1.06098e-13 | 1.000000 |
| rad62                         | 8.16406e-14 | 1.000000 | 8.16406e-14 | 1.000000 |
| rad50                         | 5.80275e-14 | 1.000000 | 5.80275e-14 | 1.000000 |
| rad3                          | 2.48949e-14 | 1.000000 | 2.48949e-14 | 1.000000 |
| rad4                          | 1.26108e-14 | 1.000000 | 1.26108e-14 | 1.000000 |
| rad70                         | 5.06982e-15 | 1.000000 | 5.06982e-15 | 1.000000 |
| rad55                         | 2.20118e-15 | 1.000000 | 2.20118e-15 | 1.000000 |
| Phenyl+cycC3H4                | 2.14284e-15 | 1.000000 | 0.000000    | 1.000000 |
| rad13                         | 1.39128e-15 | 1.000000 | 1.39128e-15 | 1.000000 |
| PAH1+H                        | 1.14788e-15 | 1.000000 | 1.14788e-15 | 1.000000 |



|                               |             |         |             |         |
|-------------------------------|-------------|---------|-------------|---------|
| rad23                         | 9.48556e-16 | 1.00000 | 9.48556e-16 | 1.00000 |
| rad52                         | 3.96373e-16 | 1.00000 | 3.96373e-16 | 1.00000 |
| rad58                         | 1.40187e-16 | 1.00000 | 1.40187e-16 | 1.00000 |
| rad51                         | 1.05919e-16 | 1.00000 | 1.05919e-16 | 1.00000 |
| rad34                         | 5.89059e-17 | 1.00000 | 5.89059e-17 | 1.00000 |
| rad45                         | 1.60138e-17 | 1.00000 | 1.60138e-17 | 1.00000 |
| PhcycC3H3_B+H                 | 1.04002e-17 | 1.00000 | 1.04002e-17 | 1.00000 |
| rad41                         | 8.94663e-18 | 1.00000 | 8.94663e-18 | 1.00000 |
| rad9                          | 8.83137e-18 | 1.00000 | 8.83137e-18 | 1.00000 |
| rad42                         | 7.83851e-18 | 1.00000 | 7.83851e-18 | 1.00000 |
| rad33                         | 2.52039e-18 | 1.00000 | 2.52039e-18 | 1.00000 |
| rad65                         | 2.18994e-18 | 1.00000 | 2.18994e-18 | 1.00000 |
| rad14                         | 2.04426e-18 | 1.00000 | 2.04426e-18 | 1.00000 |
| Benzene+cycloprop-1-enylidene | 1.90970e-18 | 1.00000 | 1.90970e-18 | 1.00000 |
| rad27                         | 1.88198e-18 | 1.00000 | 1.88198e-18 | 1.00000 |
| rad36                         | 9.80334e-19 | 1.00000 | 9.80334e-19 | 1.00000 |
| rad25                         | 9.43156e-19 | 1.00000 | 9.43156e-19 | 1.00000 |
| rad22                         | 6.67639e-19 | 1.00000 | 6.67639e-19 | 1.00000 |
| rad15                         | 4.46402e-21 | 1.00000 | 4.46402e-21 | 1.00000 |
| rad53                         | 1.94217e-22 | 1.00000 | 1.94217e-22 | 1.00000 |
| rad31                         | 6.43986e-23 | 1.00000 | 6.43986e-23 | 1.00000 |
| rad20                         | 1.48252e-23 | 1.00000 | 1.48252e-23 | 1.00000 |
| rad21                         | 1.03872e-23 | 1.00000 | 1.03872e-23 | 1.00000 |
| rad5                          | 5.19494e-24 | 1.00000 | 5.19494e-24 | 1.00000 |
| rad64                         | 4.21194e-24 | 1.00000 | 4.21194e-24 | 1.00000 |
| rad18                         | 1.85959e-24 | 1.00000 | 1.85959e-24 | 1.00000 |
| rad24                         | 1.48703e-25 | 1.00000 | 1.48703e-25 | 1.00000 |
| rad12                         | 4.25450e-26 | 1.00000 | 4.25450e-26 | 1.00000 |
| rad47                         | 8.99839e-27 | 1.00000 | 8.99839e-27 | 1.00000 |
| rad19anti                     | 5.19080e-27 | 1.00000 | 5.19080e-27 | 1.00000 |
| rad61                         | 4.07780e-28 | 1.00000 | 4.07780e-28 | 1.00000 |
| rad56                         | 1.34938e-30 | 1.00000 | 1.34938e-30 | 1.00000 |
| rad68syn                      | 2.97786e-32 | 1.00000 | 2.97786e-32 | 1.00000 |
| rad68anti                     | 2.47145e-32 | 1.00000 | 2.47145e-32 | 1.00000 |
| rad73                         | 1.67432e-39 | 1.00000 | 1.67432e-39 | 1.00000 |
| rad19syn                      | 1.05530e-39 | 1.00000 | 1.05530e-39 | 1.00000 |
| rad40syn                      | 5.48052e-41 | 1.00000 | 5.48052e-41 | 1.00000 |
| rad40anti                     | 4.44030e-41 | 1.00000 | 4.44030e-41 | 1.00000 |
| PAH8+H                        | 4.54832e-45 | 1.00000 | 4.54832e-45 | 1.00000 |
| rad71                         | 1.63528e-48 | 1.00000 | 1.63528e-48 | 1.00000 |
| rad8                          | 1.43184e-59 | 1.00000 | 1.43184e-59 | 1.00000 |

0.100000000 Pa, 100.000000 K

=====

| Rate constant             | True (fraction)        | Effective (fraction)   |
|---------------------------|------------------------|------------------------|
| Total                     | 1.28255e-15 (1.00 )    | 1.28255e-15 (1.00 )    |
| Formation of rad19        | 1.28255e-15 (1.000 )   | 1.28255e-15 (1.000 )   |
| H-abstraction to cyc2enyl | 4.68359e-24 (3.65e-09) | 4.68359e-24 (3.65e-09) |
| H-abstraction to cyclenyl | 1.66242e-31 (1.30e-16) | 1.66242e-31 (1.30e-16) |

| species                       | PYtrue      | Cumul    | PYeffective | Cumul    |
|-------------------------------|-------------|----------|-------------|----------|
| Indene+H                      | 0.999735    | 0.999735 | 0.999735    | 0.999735 |
| PhCHCCH2+H                    | 0.000251752 | 0.999987 | 0.000251752 | 0.999987 |
| PhCCH+CH3                     | 4.39217e-06 | 0.999991 | 4.39217e-06 | 0.999991 |
| C2H2+PhCH2                    | 3.19402e-06 | 0.999994 | 3.19402e-06 | 0.999994 |
| PhCCCH3+H                     | 2.51335e-06 | 0.999997 | 2.51335e-06 | 0.999997 |
| Ph+MeAc                       | 1.92506e-06 | 0.999999 | 1.92506e-06 | 0.999999 |
| rad67                         | 5.78497e-07 | 0.999999 | 5.78497e-07 | 0.999999 |
| rad35                         | 2.54090e-07 | 1.000000 | 2.54090e-07 | 1.000000 |
| Ph+Allene                     | 1.72981e-07 | 1.000000 | 1.72981e-07 | 1.000000 |
| PAH7+H                        | 2.21062e-08 | 1.000000 | 2.21062e-08 | 1.000000 |
| PhCH2CCH+H                    | 2.18658e-08 | 1.000000 | 2.18658e-08 | 1.000000 |
| rad39                         | 6.23578e-09 | 1.000000 | 6.23578e-09 | 1.000000 |
| rad37                         | 5.99832e-09 | 1.000000 | 5.99832e-09 | 1.000000 |
| rad30                         | 4.76336e-09 | 1.000000 | 4.76336e-09 | 1.000000 |
| Benzene+cycloprop-2-enylidene | 3.65179e-09 | 1.000000 | 3.65179e-09 | 1.000000 |
| rad6                          | 1.91810e-09 | 1.000000 | 1.91810e-09 | 1.000000 |
| PAH9+H                        | 3.21656e-10 | 1.000000 | 3.21656e-10 | 1.000000 |
| rad38                         | 1.39006e-10 | 1.000000 | 1.39006e-10 | 1.000000 |
| rad60syn                      | 2.23067e-11 | 1.000000 | 2.23067e-11 | 1.000000 |
| rad60anti                     | 1.09652e-11 | 1.000000 | 1.09652e-11 | 1.000000 |
| PAH3+H                        | 9.75979e-12 | 1.000000 | 9.75979e-12 | 1.000000 |
| PAH10+CH3                     | 9.39453e-12 | 1.000000 | 9.39453e-12 | 1.000000 |
| rad46                         | 8.45867e-12 | 1.000000 | 8.45867e-12 | 1.000000 |
| rad59                         | 1.99581e-12 | 1.000000 | 1.99581e-12 | 1.000000 |
| rad28                         | 1.94144e-12 | 1.000000 | 1.94144e-12 | 1.000000 |
| rad2                          | 1.85840e-12 | 1.000000 | 1.85840e-12 | 1.000000 |
| PhcycC3H3_A+H                 | 1.51204e-12 | 1.000000 | 1.51204e-12 | 1.000000 |

|                               |             |          |             |          |
|-------------------------------|-------------|----------|-------------|----------|
| rad43                         | 4.13279e-13 | 1.000000 | 4.13279e-13 | 1.000000 |
| rad54                         | 3.21563e-13 | 1.000000 | 3.21563e-13 | 1.000000 |
| rad26                         | 2.67184e-13 | 1.000000 | 2.67184e-13 | 1.000000 |
| rad7                          | 2.19477e-13 | 1.000000 | 2.19477e-13 | 1.000000 |
| rad1                          | 1.19331e-13 | 1.000000 | 1.19331e-13 | 1.000000 |
| rad10                         | 1.14571e-13 | 1.000000 | 1.14571e-13 | 1.000000 |
| rad62                         | 8.88129e-14 | 1.000000 | 8.88129e-14 | 1.000000 |
| rad50                         | 6.29296e-14 | 1.000000 | 6.29296e-14 | 1.000000 |
| rad11                         | 6.05401e-14 | 1.000000 | 6.05401e-14 | 1.000000 |
| rad3                          | 1.42063e-14 | 1.000000 | 1.42063e-14 | 1.000000 |
| rad4                          | 7.20199e-15 | 1.000000 | 7.20199e-15 | 1.000000 |
| rad70                         | 5.76655e-15 | 1.000000 | 5.76655e-15 | 1.000000 |
| Phenyl+cycC3H4                | 3.36905e-15 | 1.000000 | 0.00000     | 1.000000 |
| rad55                         | 2.51099e-15 | 1.000000 | 2.51099e-15 | 1.000000 |
| PAH1+H                        | 1.36183e-15 | 1.000000 | 1.36183e-15 | 1.000000 |
| rad13                         | 8.05990e-16 | 1.000000 | 8.05990e-16 | 1.000000 |
| rad23                         | 4.59310e-16 | 1.000000 | 4.59310e-16 | 1.000000 |
| rad52                         | 4.38296e-16 | 1.000000 | 4.38296e-16 | 1.000000 |
| rad58                         | 1.59501e-16 | 1.000000 | 1.59501e-16 | 1.000000 |
| Benzene+cycloprop-1-enylidene | 1.29619e-16 | 1.000000 | 1.29619e-16 | 1.000000 |
| rad51                         | 1.19901e-16 | 1.000000 | 1.19901e-16 | 1.000000 |
| rad34                         | 7.04154e-17 | 1.000000 | 7.04154e-17 | 1.000000 |
| PhcycC3H3_B+H                 | 4.09117e-17 | 1.000000 | 4.09117e-17 | 1.000000 |
| rad41                         | 1.11764e-17 | 1.000000 | 1.11764e-17 | 1.000000 |
| rad42                         | 9.56999e-18 | 1.000000 | 9.56999e-18 | 1.000000 |
| rad45                         | 7.62569e-18 | 1.000000 | 7.62569e-18 | 1.000000 |
| rad9                          | 4.78611e-18 | 1.000000 | 4.78611e-18 | 1.000000 |
| rad65                         | 2.50761e-18 | 1.000000 | 2.50761e-18 | 1.000000 |
| rad33                         | 1.46693e-18 | 1.000000 | 1.46693e-18 | 1.000000 |
| rad14                         | 1.17011e-18 | 1.000000 | 1.17011e-18 | 1.000000 |
| rad27                         | 1.08063e-18 | 1.000000 | 1.08063e-18 | 1.000000 |
| rad25                         | 5.46275e-19 | 1.000000 | 5.46275e-19 | 1.000000 |
| rad36                         | 4.66887e-19 | 1.000000 | 4.66887e-19 | 1.000000 |
| rad22                         | 3.16907e-19 | 1.000000 | 3.16907e-19 | 1.000000 |
| rad15                         | 2.40188e-21 | 1.000000 | 2.40188e-21 | 1.000000 |
| rad53                         | 6.79906e-22 | 1.000000 | 6.79906e-22 | 1.000000 |
| rad31                         | 3.78235e-23 | 1.000000 | 3.78235e-23 | 1.000000 |
| rad64                         | 2.26904e-23 | 1.000000 | 2.26904e-23 | 1.000000 |
| rad20                         | 8.58041e-24 | 1.000000 | 8.58041e-24 | 1.000000 |
| rad21                         | 6.04051e-24 | 1.000000 | 6.04051e-24 | 1.000000 |
| rad5                          | 2.44557e-24 | 1.000000 | 2.44557e-24 | 1.000000 |
| rad18                         | 9.52431e-25 | 1.000000 | 9.52431e-25 | 1.000000 |
| rad24                         | 7.18905e-26 | 1.000000 | 7.18905e-26 | 1.000000 |
| rad12                         | 2.31962e-26 | 1.000000 | 2.31962e-26 | 1.000000 |
| rad61                         | 9.04759e-27 | 1.000000 | 9.04759e-27 | 1.000000 |
| rad47                         | 8.19295e-27 | 1.000000 | 8.19295e-27 | 1.000000 |
| rad19anti                     | 2.83197e-27 | 1.000000 | 2.83197e-27 | 1.000000 |
| rad56                         | 5.01427e-29 | 1.000000 | 5.01427e-29 | 1.000000 |
| rad68syn                      | 1.55245e-30 | 1.000000 | 1.55245e-30 | 1.000000 |
| rad68anti                     | 1.27470e-30 | 1.000000 | 1.27470e-30 | 1.000000 |
| rad40syn                      | 1.99962e-36 | 1.000000 | 1.99962e-36 | 1.000000 |
| rad40anti                     | 1.52242e-36 | 1.000000 | 1.52242e-36 | 1.000000 |
| rad73                         | 7.58199e-37 | 1.000000 | 7.58199e-37 | 1.000000 |
| rad19syn                      | 2.08907e-39 | 1.000000 | 2.08907e-39 | 1.000000 |
| PAH8+H                        | 2.30341e-42 | 1.000000 | 2.30341e-42 | 1.000000 |
| rad71                         | 9.84188e-46 | 1.000000 | 9.84188e-46 | 1.000000 |
| rad8                          | 1.26087e-59 | 1.000000 | 1.26087e-59 | 1.000000 |

0.100000000 Pa, 110.000000 K

| Rate constant             | True (fraction)        | Effective (fraction)   |
|---------------------------|------------------------|------------------------|
| Total                     | 1.95524e-15 (1.00 )    | 1.95524e-15 (1.00 )    |
| Formation of rad19        | 1.95524e-15 (1.000 )   | 1.95524e-15 (1.000 )   |
| H-abstraction to cyc2enyl | 4.50936e-23 (2.31e-08) | 4.50936e-23 (2.31e-08) |
| H-abstraction to cyclenyl | 7.87782e-30 (4.03e-15) | 7.87782e-30 (4.03e-15) |

  

| species    | PYtrue      | Cumul    | PYeffective | Cumul    |
|------------|-------------|----------|-------------|----------|
| Indene+H   | 0.999728    | 0.999728 | 0.999728    | 0.999728 |
| PhCHCCH2+H | 0.000258254 | 0.999986 | 0.000258254 | 0.999986 |
| PhCCH+CH3  | 4.51603e-06 | 0.999991 | 4.51603e-06 | 0.999991 |
| C2H2+PhCH2 | 3.30563e-06 | 0.999994 | 3.30563e-06 | 0.999994 |
| PhCCCH3+H  | 2.59074e-06 | 0.999997 | 2.59074e-06 | 0.999997 |
| Ph+MeAc    | 1.99802e-06 | 0.999999 | 1.99802e-06 | 0.999999 |
| rad67      | 5.99209e-07 | 0.999999 | 5.99209e-07 | 0.999999 |
| rad35      | 2.62806e-07 | 1.000000 | 2.62806e-07 | 1.000000 |
| Ph+Allene  | 1.82664e-07 | 1.000000 | 1.82664e-07 | 1.000000 |
| PhCH2CCH+H | 2.32978e-08 | 1.000000 | 2.32978e-08 | 1.000000 |
| PAH7+H     | 2.31615e-08 | 1.000000 | 2.31615e-08 | 1.000000 |

|                               |             |          |             |          |
|-------------------------------|-------------|----------|-------------|----------|
| Benzene+cycloprop-2-enylidene | 2.30629e-08 | 1.000000 | 2.30629e-08 | 1.000000 |
| rad39                         | 6.53428e-09 | 1.000000 | 6.53428e-09 | 1.000000 |
| rad37                         | 6.27761e-09 | 1.000000 | 6.27761e-09 | 1.000000 |
| rad30                         | 4.93215e-09 | 1.000000 | 4.93215e-09 | 1.000000 |
| rad6                          | 1.15712e-09 | 1.000000 | 1.15712e-09 | 1.000000 |
| PAH9+H                        | 3.37373e-10 | 1.000000 | 3.37373e-10 | 1.000000 |
| rad38                         | 1.46440e-10 | 1.000000 | 1.46440e-10 | 1.000000 |
| rad60syn                      | 2.34274e-11 | 1.000000 | 2.34274e-11 | 1.000000 |
| rad60anti                     | 1.15307e-11 | 1.000000 | 1.15307e-11 | 1.000000 |
| PAH3+H                        | 1.04347e-11 | 1.000000 | 1.04347e-11 | 1.000000 |
| PAH10+CH3                     | 1.03268e-11 | 1.000000 | 1.03268e-11 | 1.000000 |
| rad46                         | 8.95291e-12 | 1.000000 | 8.95291e-12 | 1.000000 |
| rad59                         | 2.12801e-12 | 1.000000 | 2.12801e-12 | 1.000000 |
| PhcycC3H3_A+H                 | 1.87002e-12 | 1.000000 | 1.87002e-12 | 1.000000 |
| rad28                         | 1.16380e-12 | 1.000000 | 1.16380e-12 | 1.000000 |
| rad2                          | 1.11151e-12 | 1.000000 | 1.11151e-12 | 1.000000 |
| rad43                         | 4.49263e-13 | 1.000000 | 4.49263e-13 | 1.000000 |
| rad54                         | 3.56407e-13 | 1.000000 | 3.56407e-13 | 1.000000 |
| rad26                         | 1.60797e-13 | 1.000000 | 1.60797e-13 | 1.000000 |
| rad7                          | 1.30951e-13 | 1.000000 | 1.30951e-13 | 1.000000 |
| rad62                         | 9.69425e-14 | 1.000000 | 9.69425e-14 | 1.000000 |
| rad1                          | 7.16246e-14 | 1.000000 | 7.16246e-14 | 1.000000 |
| rad50                         | 6.84350e-14 | 1.000000 | 6.84350e-14 | 1.000000 |
| rad10                         | 6.82236e-14 | 1.000000 | 6.82236e-14 | 1.000000 |
| rad11                         | 3.59955e-14 | 1.000000 | 3.59955e-14 | 1.000000 |
| rad3                          | 8.44515e-15 | 1.000000 | 8.44515e-15 | 1.000000 |
| rad70                         | 6.58478e-15 | 1.000000 | 6.58478e-15 | 1.000000 |
| Phenyl+cycC3H4                | 5.18630e-15 | 1.000000 | 0.00000     | 1.000000 |
| rad4                          | 4.28506e-15 | 1.000000 | 4.28506e-15 | 1.000000 |
| Benzene+cycloprop-1-enylidene | 4.02908e-15 | 1.000000 | 4.02908e-15 | 1.000000 |
| rad55                         | 2.87442e-15 | 1.000000 | 2.87442e-15 | 1.000000 |
| PAH1+H                        | 1.62598e-15 | 1.000000 | 1.62598e-15 | 1.000000 |
| rad52                         | 4.86466e-16 | 1.000000 | 4.86466e-16 | 1.000000 |
| rad13                         | 4.85864e-16 | 1.000000 | 4.85864e-16 | 1.000000 |
| rad23                         | 2.35590e-16 | 1.000000 | 2.35590e-16 | 1.000000 |
| rad58                         | 1.82702e-16 | 1.000000 | 1.82702e-16 | 1.000000 |
| rad51                         | 1.36407e-16 | 1.000000 | 1.36407e-16 | 1.000000 |
| PhcycC3H3_B+H                 | 1.30405e-16 | 1.000000 | 1.30405e-16 | 1.000000 |
| rad34                         | 8.46521e-17 | 1.000000 | 8.46521e-17 | 1.000000 |
| rad41                         | 1.40528e-17 | 1.000000 | 1.40528e-17 | 1.000000 |
| rad42                         | 1.17624e-17 | 1.000000 | 1.17624e-17 | 1.000000 |
| rad45                         | 3.85510e-18 | 1.000000 | 3.85510e-18 | 1.000000 |
| rad65                         | 2.88723e-18 | 1.000000 | 2.88723e-18 | 1.000000 |
| rad9                          | 2.84641e-18 | 1.000000 | 2.84641e-18 | 1.000000 |
| rad33                         | 8.87946e-19 | 1.000000 | 8.87946e-19 | 1.000000 |
| rad14                         | 6.97844e-19 | 1.000000 | 6.97844e-19 | 1.000000 |
| rad27                         | 6.46197e-19 | 1.000000 | 6.46197e-19 | 1.000000 |
| rad25                         | 3.29280e-19 | 1.000000 | 3.29280e-19 | 1.000000 |
| rad36                         | 2.36102e-19 | 1.000000 | 2.36102e-19 | 1.000000 |
| rad22                         | 1.59827e-19 | 1.000000 | 1.59827e-19 | 1.000000 |
| rad53                         | 1.97087e-21 | 1.000000 | 1.97087e-21 | 1.000000 |
| rad15                         | 1.41967e-21 | 1.000000 | 1.41967e-21 | 1.000000 |
| rad64                         | 9.43936e-23 | 1.000000 | 9.43936e-23 | 1.000000 |
| rad31                         | 2.31745e-23 | 1.000000 | 2.31745e-23 | 1.000000 |
| rad20                         | 5.22308e-24 | 1.000000 | 5.22308e-24 | 1.000000 |
| rad21                         | 3.69346e-24 | 1.000000 | 3.69346e-24 | 1.000000 |
| rad5                          | 1.23457e-24 | 1.000000 | 1.23457e-24 | 1.000000 |
| rad18                         | 5.19979e-25 | 1.000000 | 5.19979e-25 | 1.000000 |
| rad61                         | 1.15843e-25 | 1.000000 | 1.15843e-25 | 1.000000 |
| rad24                         | 3.68724e-26 | 1.000000 | 3.68724e-26 | 1.000000 |
| rad12                         | 1.38844e-26 | 1.000000 | 1.38844e-26 | 1.000000 |
| rad47                         | 7.60533e-27 | 1.000000 | 7.60533e-27 | 1.000000 |
| rad19anti                     | 1.70079e-27 | 1.000000 | 1.70079e-27 | 1.000000 |
| rad56                         | 9.94353e-28 | 1.000000 | 9.94353e-28 | 1.000000 |
| rad68syn                      | 4.00649e-29 | 1.000000 | 4.00649e-29 | 1.000000 |
| rad68anti                     | 3.26356e-29 | 1.000000 | 3.26356e-29 | 1.000000 |
| rad40syn                      | 3.23299e-34 | 1.000000 | 3.23299e-34 | 1.000000 |
| rad40anti                     | 2.54450e-34 | 1.000000 | 2.54450e-34 | 1.000000 |
| rad73                         | 5.46632e-35 | 1.000000 | 5.46632e-35 | 1.000000 |
| rad19syn                      | 4.31565e-39 | 1.000000 | 4.31565e-39 | 1.000000 |
| PAH8+H                        | 1.08508e-39 | 1.000000 | 1.08508e-39 | 1.000000 |
| rad71                         | 5.55600e-43 | 1.000000 | 5.55600e-43 | 1.000000 |
| rad8                          | 1.20596e-59 | 1.000000 | 1.20596e-59 | 1.000000 |

0.100000000 Pa, 120.000000 K

=====

| Rate constant      | True (fraction)      | Effective (fraction) |
|--------------------|----------------------|----------------------|
| Total              | 2.79817e-15 (1.00 )  | 2.79817e-15 (1.00 )  |
| Formation of rad19 | 2.79817e-15 (1.000 ) | 2.79817e-15 (1.000 ) |

H-abstraction to cyc2enyl | 2.96039e-22 (1.06e-07) 2.96039e-22 (1.06e-07)  
H-abstraction to cyclenyl | 1.95323e-28 (6.98e-14) 1.95323e-28 (6.98e-14)

| species                       | PYtrue      | Cumul    | PYeffective | Cumul    |
|-------------------------------|-------------|----------|-------------|----------|
| Indene+H                      | 0.999721    | 0.999721 | 0.999721    | 0.999721 |
| PhCHCCH2+H                    | 0.000265218 | 0.999986 | 0.000265218 | 0.999986 |
| PhCCH+CH3                     | 4.64834e-06 | 0.999991 | 4.64834e-06 | 0.999991 |
| C2H2+PhCH2                    | 3.42543e-06 | 0.999994 | 3.42543e-06 | 0.999994 |
| PhCCCH3+H                     | 2.67398e-06 | 0.999997 | 2.67398e-06 | 0.999997 |
| Ph+MeAc                       | 2.07707e-06 | 0.999999 | 2.07707e-06 | 0.999999 |
| rad67                         | 6.21635e-07 | 1.000000 | 6.21635e-07 | 1.000000 |
| rad35                         | 2.72229e-07 | 1.000000 | 2.72229e-07 | 1.000000 |
| Ph+Allene                     | 1.93204e-07 | 1.000000 | 1.93204e-07 | 1.000000 |
| Benzene+cycloprop-2-enylidene | 1.05797e-07 | 1.000000 | 1.05797e-07 | 1.000000 |
| PhCH2CCH+H                    | 2.48726e-08 | 1.000000 | 2.48726e-08 | 1.000000 |
| PAH7+H                        | 2.42987e-08 | 1.000000 | 2.42987e-08 | 1.000000 |
| rad39                         | 6.85576e-09 | 1.000000 | 6.85576e-09 | 1.000000 |
| rad37                         | 6.58355e-09 | 1.000000 | 6.58355e-09 | 1.000000 |
| rad30                         | 5.11486e-09 | 1.000000 | 5.11486e-09 | 1.000000 |
| rad6                          | 7.21222e-10 | 1.000000 | 7.21222e-10 | 1.000000 |
| PAH9+H                        | 3.54470e-10 | 1.000000 | 3.54470e-10 | 1.000000 |
| rad38                         | 1.54590e-10 | 1.000000 | 1.54590e-10 | 1.000000 |
| rad60syn                      | 2.46610e-11 | 1.000000 | 2.46610e-11 | 1.000000 |
| rad60anti                     | 1.21541e-11 | 1.000000 | 1.21541e-11 | 1.000000 |
| PAH10+CH3                     | 1.14065e-11 | 1.000000 | 1.14065e-11 | 1.000000 |
| PAH3+H                        | 1.11933e-11 | 1.000000 | 1.11933e-11 | 1.000000 |
| rad46                         | 9.49573e-12 | 1.000000 | 9.49573e-12 | 1.000000 |
| PhcycC3H3_A+H                 | 2.32907e-12 | 1.000000 | 2.32907e-12 | 1.000000 |
| rad59                         | 2.27612e-12 | 1.000000 | 2.27612e-12 | 1.000000 |
| rad28                         | 7.21346e-13 | 1.000000 | 7.21346e-13 | 1.000000 |
| rad2                          | 6.87380e-13 | 1.000000 | 6.87380e-13 | 1.000000 |
| rad43                         | 4.90316e-13 | 1.000000 | 4.90316e-13 | 1.000000 |
| rad54                         | 3.96331e-13 | 1.000000 | 3.96331e-13 | 1.000000 |
| rad62                         | 1.06211e-13 | 1.000000 | 1.06211e-13 | 1.000000 |
| rad26                         | 9.99908e-14 | 1.000000 | 9.99908e-14 | 1.000000 |
| rad7                          | 8.08307e-14 | 1.000000 | 8.08307e-14 | 1.000000 |
| rad50                         | 7.46737e-14 | 1.000000 | 7.46737e-14 | 1.000000 |
| Benzene+cycloprop-1-enylidene | 6.98038e-14 | 1.000000 | 6.98038e-14 | 1.000000 |
| rad1                          | 4.44655e-14 | 1.000000 | 4.44655e-14 | 1.000000 |
| rad10                         | 4.20283e-14 | 1.000000 | 4.20283e-14 | 1.000000 |
| rad11                         | 2.21512e-14 | 1.000000 | 2.21512e-14 | 1.000000 |
| Phenyl+cycC3H4                | 7.86468e-15 | 1.000000 | 0.000000    | 1.000000 |
| rad70                         | 7.55597e-15 | 1.000000 | 7.55597e-15 | 1.000000 |
| rad3                          | 5.19523e-15 | 1.000000 | 5.19523e-15 | 1.000000 |
| rad55                         | 3.30554e-15 | 1.000000 | 3.30554e-15 | 1.000000 |
| rad4                          | 2.63862e-15 | 1.000000 | 2.63862e-15 | 1.000000 |
| PAH1+H                        | 1.95556e-15 | 1.000000 | 1.95556e-15 | 1.000000 |
| rad52                         | 5.42359e-16 | 1.000000 | 5.42359e-16 | 1.000000 |
| PhcycC3H3_B+H                 | 3.56801e-16 | 1.000000 | 3.56801e-16 | 1.000000 |
| rad13                         | 3.02805e-16 | 1.000000 | 3.02805e-16 | 1.000000 |
| rad58                         | 2.10796e-16 | 1.000000 | 2.10796e-16 | 1.000000 |
| rad51                         | 1.56105e-16 | 1.000000 | 1.56105e-16 | 1.000000 |
| rad23                         | 1.26773e-16 | 1.000000 | 1.26773e-16 | 1.000000 |
| rad34                         | 1.02461e-16 | 1.000000 | 1.02461e-16 | 1.000000 |
| rad41                         | 1.77971e-17 | 1.000000 | 1.77971e-17 | 1.000000 |
| rad42                         | 1.45594e-17 | 1.000000 | 1.45594e-17 | 1.000000 |
| rad65                         | 3.34587e-18 | 1.000000 | 3.34587e-18 | 1.000000 |
| rad45                         | 2.04828e-18 | 1.000000 | 2.04828e-18 | 1.000000 |
| rad9                          | 1.82625e-18 | 1.000000 | 1.82625e-18 | 1.000000 |
| rad33                         | 5.55463e-19 | 1.000000 | 5.55463e-19 | 1.000000 |
| rad14                         | 4.30743e-19 | 1.000000 | 4.30743e-19 | 1.000000 |
| rad27                         | 3.99780e-19 | 1.000000 | 3.99780e-19 | 1.000000 |
| rad25                         | 2.05223e-19 | 1.000000 | 2.05223e-19 | 1.000000 |
| rad36                         | 1.25507e-19 | 1.000000 | 1.25507e-19 | 1.000000 |
| rad22                         | 8.47622e-20 | 1.000000 | 8.47622e-20 | 1.000000 |
| rad53                         | 4.97218e-21 | 1.000000 | 4.97218e-21 | 1.000000 |
| rad15                         | 9.06006e-22 | 1.000000 | 9.06006e-22 | 1.000000 |
| rad64                         | 3.22665e-22 | 1.000000 | 3.22665e-22 | 1.000000 |
| rad31                         | 1.47188e-23 | 1.000000 | 1.47188e-23 | 1.000000 |
| rad20                         | 3.31531e-24 | 1.000000 | 3.31531e-24 | 1.000000 |
| rad21                         | 2.35440e-24 | 1.000000 | 2.35440e-24 | 1.000000 |
| rad61                         | 9.87529e-25 | 1.000000 | 9.87529e-25 | 1.000000 |
| rad5                          | 6.60296e-25 | 1.000000 | 6.60296e-25 | 1.000000 |
| rad18                         | 2.99186e-25 | 1.000000 | 2.99186e-25 | 1.000000 |
| rad24                         | 1.98655e-26 | 1.000000 | 1.98655e-26 | 1.000000 |
| rad56                         | 1.22150e-26 | 1.000000 | 1.22150e-26 | 1.000000 |
| rad12                         | 8.96945e-27 | 1.000000 | 8.96945e-27 | 1.000000 |
| rad47                         | 7.18068e-27 | 1.000000 | 7.18068e-27 | 1.000000 |
| rad19anti                     | 1.10981e-27 | 1.000000 | 1.10981e-27 | 1.000000 |

|           |             |         |             |         |
|-----------|-------------|---------|-------------|---------|
| rad68syn  | 6.07796e-28 | 1.00000 | 6.07796e-28 | 1.00000 |
| rad68anti | 4.91955e-28 | 1.00000 | 4.91955e-28 | 1.00000 |
| rad40syn  | 1.64488e-32 | 1.00000 | 1.64488e-32 | 1.00000 |
| rad40anti | 1.29360e-32 | 1.00000 | 1.29360e-32 | 1.00000 |
| rad73     | 1.91061e-33 | 1.00000 | 1.91061e-33 | 1.00000 |
| PAH8+H    | 4.13367e-35 | 1.00000 | 4.13367e-35 | 1.00000 |
| rad71     | 1.32110e-38 | 1.00000 | 1.32110e-38 | 1.00000 |
| rad19syn  | 9.31466e-39 | 1.00000 | 9.31466e-39 | 1.00000 |
| rad8      | 1.24801e-59 | 1.00000 | 1.24801e-59 | 1.00000 |

0.100000000 Pa, 130.000000 K

| Rate constant             | True (fraction)        | Effective (fraction)   |
|---------------------------|------------------------|------------------------|
| Total                     | 3.81236e-15 (1.00 )    | 3.81236e-15 (1.00 )    |
| Formation of rad19        | 3.81236e-15 (1.000 )   | 3.81236e-15 (1.000 )   |
| H-abstraction to cyc2enyl | 1.44825e-21 (3.80e-07) | 1.44825e-21 (3.80e-07) |
| H-abstraction to cyclenyl | 2.94348e-27 (7.72e-13) | 2.94348e-27 (7.72e-13) |

| species                       | PYtrue      | Cumul    | PYeffective | Cumul    |
|-------------------------------|-------------|----------|-------------|----------|
| Indene+H                      | 0.999713    | 0.999713 | 0.999713    | 0.999713 |
| PhCHCCH2+H                    | 0.000272694 | 0.999985 | 0.000272694 | 0.999985 |
| PhCCH+CH3                     | 4.79006e-06 | 0.999990 | 4.79006e-06 | 0.999990 |
| C2H2+PhCH2                    | 3.55462e-06 | 0.999994 | 3.55462e-06 | 0.999994 |
| PhCCCH3+H                     | 2.76373e-06 | 0.999996 | 2.76373e-06 | 0.999996 |
| Ph+MeAc                       | 2.16295e-06 | 0.999999 | 2.16295e-06 | 0.999999 |
| rad67                         | 6.45982e-07 | 0.999999 | 6.45982e-07 | 0.999999 |
| Benzene+cycloprop-2-enylidene | 3.79882e-07 | 1.000000 | 3.79882e-07 | 1.000000 |
| rad35                         | 2.82442e-07 | 1.000000 | 2.82442e-07 | 1.000000 |
| Ph+Allene                     | 2.04763e-07 | 1.000000 | 2.04763e-07 | 1.000000 |
| PhCH2CCH+H                    | 2.66179e-08 | 1.000000 | 2.66179e-08 | 1.000000 |
| PAH7+H                        | 2.55330e-08 | 1.000000 | 2.55330e-08 | 1.000000 |
| rad39                         | 7.20453e-09 | 1.000000 | 7.20453e-09 | 1.000000 |
| rad37                         | 6.91989e-09 | 1.000000 | 6.91989e-09 | 1.000000 |
| rad30                         | 5.31326e-09 | 1.000000 | 5.31326e-09 | 1.000000 |
| rad6                          | 4.62169e-10 | 1.000000 | 4.62169e-10 | 1.000000 |
| PAH9+H                        | 3.73185e-10 | 1.000000 | 3.73185e-10 | 1.000000 |
| rad38                         | 1.63582e-10 | 1.000000 | 1.63582e-10 | 1.000000 |
| rad60syn                      | 2.60244e-11 | 1.000000 | 2.60244e-11 | 1.000000 |
| rad60anti                     | 1.28442e-11 | 1.000000 | 1.28442e-11 | 1.000000 |
| PAH10+CH3                     | 1.26652e-11 | 1.000000 | 1.26652e-11 | 1.000000 |
| PAH3+H                        | 1.20507e-11 | 1.000000 | 1.20507e-11 | 1.000000 |
| rad46                         | 1.00961e-11 | 1.000000 | 1.00961e-11 | 1.000000 |
| PhcycC3H3_A+H                 | 2.92209e-12 | 1.000000 | 2.92209e-12 | 1.000000 |
| rad59                         | 2.44287e-12 | 1.000000 | 2.44287e-12 | 1.000000 |
| Benzene+cycloprop-1-enylidene | 7.72089e-13 | 1.000000 | 7.72089e-13 | 1.000000 |
| rad43                         | 5.37416e-13 | 1.000000 | 5.37416e-13 | 1.000000 |
| rad28                         | 4.59952e-13 | 1.000000 | 4.59952e-13 | 1.000000 |
| rad54                         | 4.42525e-13 | 1.000000 | 4.42525e-13 | 1.000000 |
| rad2                          | 4.37317e-13 | 1.000000 | 4.37317e-13 | 1.000000 |
| rad62                         | 1.16842e-13 | 1.000000 | 1.16842e-13 | 1.000000 |
| rad50                         | 8.18042e-14 | 1.000000 | 8.18042e-14 | 1.000000 |
| rad26                         | 6.39314e-14 | 1.000000 | 6.39314e-14 | 1.000000 |
| rad7                          | 5.13503e-14 | 1.000000 | 5.13503e-14 | 1.000000 |
| rad1                          | 2.84088e-14 | 1.000000 | 2.84088e-14 | 1.000000 |
| rad10                         | 2.66478e-14 | 1.000000 | 2.66478e-14 | 1.000000 |
| rad11                         | 1.40346e-14 | 1.000000 | 1.40346e-14 | 1.000000 |
| Phenyl+cycC3H4                | 1.18041e-14 | 1.000000 | 0.000000    | 1.000000 |
| rad70                         | 8.72057e-15 | 1.000000 | 8.72057e-15 | 1.000000 |
| rad55                         | 3.82234e-15 | 1.000000 | 3.82234e-15 | 1.000000 |
| rad3                          | 3.29015e-15 | 1.000000 | 3.29015e-15 | 1.000000 |
| PAH1+H                        | 2.37115e-15 | 1.000000 | 2.37115e-15 | 1.000000 |
| rad4                          | 1.67284e-15 | 1.000000 | 1.67284e-15 | 1.000000 |
| PhcycC3H3_B+H                 | 8.71396e-16 | 1.000000 | 8.71396e-16 | 1.000000 |
| rad52                         | 6.07835e-16 | 1.000000 | 6.07835e-16 | 1.000000 |
| rad58                         | 2.45115e-16 | 1.000000 | 2.45115e-16 | 1.000000 |
| rad13                         | 1.94122e-16 | 1.000000 | 1.94122e-16 | 1.000000 |
| rad51                         | 1.79867e-16 | 1.000000 | 1.79867e-16 | 1.000000 |
| rad34                         | 1.24987e-16 | 1.000000 | 1.24987e-16 | 1.000000 |
| rad23                         | 7.10386e-17 | 1.000000 | 7.10386e-17 | 1.000000 |
| rad41                         | 2.27155e-17 | 1.000000 | 2.27155e-17 | 1.000000 |
| rad42                         | 1.81563e-17 | 1.000000 | 1.81563e-17 | 1.000000 |
| rad65                         | 3.90614e-18 | 1.000000 | 3.90614e-18 | 1.000000 |
| rad9                          | 1.24837e-18 | 1.000000 | 1.24837e-18 | 1.000000 |
| rad45                         | 1.13495e-18 | 1.000000 | 1.13495e-18 | 1.000000 |
| rad33                         | 3.57324e-19 | 1.000000 | 3.57324e-19 | 1.000000 |
| rad14                         | 2.73735e-19 | 1.000000 | 2.73735e-19 | 1.000000 |
| rad27                         | 2.54572e-19 | 1.000000 | 2.54572e-19 | 1.000000 |
| rad25                         | 1.31579e-19 | 1.000000 | 1.31579e-19 | 1.000000 |

|           |             |         |             |         |
|-----------|-------------|---------|-------------|---------|
| rad36     | 6.95921e-20 | 1.00000 | 6.95921e-20 | 1.00000 |
| rad22     | 4.68976e-20 | 1.00000 | 4.68976e-20 | 1.00000 |
| rad53     | 1.13289e-20 | 1.00000 | 1.13289e-20 | 1.00000 |
| rad64     | 9.50400e-22 | 1.00000 | 9.50400e-22 | 1.00000 |
| rad15     | 6.16435e-22 | 1.00000 | 6.16435e-22 | 1.00000 |
| rad31     | 9.64314e-24 | 1.00000 | 9.64314e-24 | 1.00000 |
| rad61     | 6.18971e-24 | 1.00000 | 6.18971e-24 | 1.00000 |
| rad20     | 2.18001e-24 | 1.00000 | 2.18001e-24 | 1.00000 |
| rad21     | 1.55453e-24 | 1.00000 | 1.55453e-24 | 1.00000 |
| rad5      | 3.70746e-25 | 1.00000 | 3.70746e-25 | 1.00000 |
| rad18     | 1.79875e-25 | 1.00000 | 1.79875e-25 | 1.00000 |
| rad56     | 1.03952e-25 | 1.00000 | 1.03952e-25 | 1.00000 |
| rad24     | 1.11573e-26 | 1.00000 | 1.11573e-26 | 1.00000 |
| rad47     | 6.88457e-27 | 1.00000 | 6.88457e-27 | 1.00000 |
| rad12     | 6.17606e-27 | 1.00000 | 6.17606e-27 | 1.00000 |
| rad68syn  | 6.14207e-27 | 1.00000 | 6.14207e-27 | 1.00000 |
| rad68anti | 4.94436e-27 | 1.00000 | 4.94436e-27 | 1.00000 |
| rad19anti | 7.85949e-28 | 1.00000 | 7.85949e-28 | 1.00000 |
| rad40syn  | 4.43220e-31 | 1.00000 | 4.43220e-31 | 1.00000 |
| rad40anti | 3.49015e-31 | 1.00000 | 3.49015e-31 | 1.00000 |
| rad73     | 3.94318e-32 | 1.00000 | 3.94318e-32 | 1.00000 |
| PAH8+H    | 2.25534e-33 | 1.00000 | 2.25534e-33 | 1.00000 |
| rad71     | 1.11858e-36 | 1.00000 | 1.11858e-36 | 1.00000 |
| rad19syn  | 2.10397e-38 | 1.00000 | 2.10397e-38 | 1.00000 |
| rad8      | 1.39257e-59 | 1.00000 | 1.39257e-59 | 1.00000 |

0.100000000 Pa, 140.000000 K

| Rate constant             | True (fraction)        | Effective (fraction)   |
|---------------------------|------------------------|------------------------|
| Total                     | 4.99515e-15 (1.00 )    | 4.99515e-15 (1.00 )    |
| Formation of rad19        | 4.99514e-15 (1.000 )   | 4.99514e-15 (1.000 )   |
| H-abstraction to cyc2enyl | 5.62488e-21 (1.13e-06) | 5.62488e-21 (1.13e-06) |
| H-abstraction to cyclenyl | 3.00047e-26 (6.01e-12) | 3.00047e-26 (6.01e-12) |

| species                       | PYtrue      | Cumul    | PYeffective | Cumul    |
|-------------------------------|-------------|----------|-------------|----------|
| Indene+H                      | 0.999703    | 0.999703 | 0.999703    | 0.999703 |
| PhCHCCH2+H                    | 0.000280742 | 0.999984 | 0.000280742 | 0.999984 |
| PhCCH+CH3                     | 4.94230e-06 | 0.999989 | 4.94230e-06 | 0.999989 |
| C2H2+PhCH2                    | 3.69454e-06 | 0.999992 | 3.69454e-06 | 0.999992 |
| PhCCCH3+H                     | 2.86077e-06 | 0.999995 | 2.86077e-06 | 0.999995 |
| Ph+MeAc                       | 2.25656e-06 | 0.999997 | 2.25656e-06 | 0.999997 |
| Benzene+cycloprop-2-enylidene | 1.12607e-06 | 0.999998 | 1.12607e-06 | 0.999998 |
| rad67                         | 6.72497e-07 | 0.999999 | 6.72497e-07 | 0.999999 |
| rad35                         | 2.93546e-07 | 0.999999 | 2.93546e-07 | 0.999999 |
| Ph+Allene                     | 2.17522e-07 | 1.000000 | 2.17522e-07 | 1.000000 |
| PhCH2CCH+H                    | 2.85662e-08 | 1.000000 | 2.85662e-08 | 1.000000 |
| PAH7+H                        | 2.68814e-08 | 1.000000 | 2.68814e-08 | 1.000000 |
| rad39                         | 7.58531e-09 | 1.000000 | 7.58531e-09 | 1.000000 |
| rad37                         | 7.29106e-09 | 1.000000 | 7.29106e-09 | 1.000000 |
| rad30                         | 5.52942e-09 | 1.000000 | 5.52942e-09 | 1.000000 |
| PAH9+H                        | 3.93790e-10 | 1.000000 | 3.93790e-10 | 1.000000 |
| rad6                          | 3.03283e-10 | 1.000000 | 3.03283e-10 | 1.000000 |
| rad38                         | 1.73563e-10 | 1.000000 | 1.73563e-10 | 1.000000 |
| rad60syn                      | 2.75379e-11 | 1.000000 | 2.75379e-11 | 1.000000 |
| PAH10+CH3                     | 1.41426e-11 | 1.000000 | 1.41426e-11 | 1.000000 |
| rad60anti                     | 1.36115e-11 | 1.000000 | 1.36115e-11 | 1.000000 |
| PAH3+H                        | 1.30249e-11 | 1.000000 | 1.30249e-11 | 1.000000 |
| rad46                         | 1.07644e-11 | 1.000000 | 1.07644e-11 | 1.000000 |
| Benzene+cycloprop-1-enylidene | 6.00677e-12 | 1.000000 | 6.00677e-12 | 1.000000 |
| PhcycC3H3_A+H                 | 3.69385e-12 | 1.000000 | 3.69385e-12 | 1.000000 |
| rad59                         | 2.63163e-12 | 1.000000 | 2.63163e-12 | 1.000000 |
| rad43                         | 5.91777e-13 | 1.000000 | 5.91777e-13 | 1.000000 |
| rad54                         | 4.96462e-13 | 1.000000 | 4.96462e-13 | 1.000000 |
| rad28                         | 3.00479e-13 | 1.000000 | 3.00479e-13 | 1.000000 |
| rad2                          | 2.85071e-13 | 1.000000 | 2.85071e-13 | 1.000000 |
| rad62                         | 1.29113e-13 | 1.000000 | 1.29113e-13 | 1.000000 |
| rad50                         | 9.00211e-14 | 1.000000 | 9.00211e-14 | 1.000000 |
| rad26                         | 4.18621e-14 | 1.000000 | 4.18621e-14 | 1.000000 |
| rad7                          | 3.34353e-14 | 1.000000 | 3.34353e-14 | 1.000000 |
| rad1                          | 1.86040e-14 | 1.000000 | 1.86040e-14 | 1.000000 |
| Phenyl+cycC3H4                | 1.75978e-14 | 1.000000 | 0.000000    | 1.000000 |
| rad10                         | 1.73182e-14 | 1.000000 | 1.73182e-14 | 1.000000 |
| rad70                         | 1.01309e-14 | 1.000000 | 1.01309e-14 | 1.000000 |
| rad11                         | 9.11641e-15 | 1.000000 | 9.11641e-15 | 1.000000 |
| rad55                         | 4.44807e-15 | 1.000000 | 4.44807e-15 | 1.000000 |
| PAH1+H                        | 2.90065e-15 | 1.000000 | 2.90065e-15 | 1.000000 |
| rad3                          | 2.13615e-15 | 1.000000 | 2.13615e-15 | 1.000000 |
| PhcycC3H3_B+H                 | 1.95206e-15 | 1.000000 | 1.95206e-15 | 1.000000 |

|           |             |          |             |          |
|-----------|-------------|----------|-------------|----------|
| rad4      | 1.08739e-15 | 1.000000 | 1.08739e-15 | 1.000000 |
| rad52     | 6.85263e-16 | 1.000000 | 6.85263e-16 | 1.000000 |
| rad58     | 2.87425e-16 | 1.000000 | 2.87425e-16 | 1.000000 |
| rad51     | 2.08838e-16 | 1.000000 | 2.08838e-16 | 1.000000 |
| rad34     | 1.53787e-16 | 1.000000 | 1.53787e-16 | 1.000000 |
| rad13     | 1.27494e-16 | 1.000000 | 1.27494e-16 | 1.000000 |
| rad23     | 4.12107e-17 | 1.000000 | 4.12107e-17 | 1.000000 |
| rad41     | 2.92336e-17 | 1.000000 | 2.92336e-17 | 1.000000 |
| rad42     | 2.28182e-17 | 1.000000 | 2.28182e-17 | 1.000000 |
| rad65     | 4.59805e-18 | 1.000000 | 4.59805e-18 | 1.000000 |
| rad9      | 9.00704e-19 | 1.000000 | 9.00704e-19 | 1.000000 |
| rad45     | 6.51855e-19 | 1.000000 | 6.51855e-19 | 1.000000 |
| rad33     | 2.35441e-19 | 1.000000 | 2.35441e-19 | 1.000000 |
| rad14     | 1.78352e-19 | 1.000000 | 1.78352e-19 | 1.000000 |
| rad27     | 1.66166e-19 | 1.000000 | 1.66166e-19 | 1.000000 |
| rad25     | 8.64327e-20 | 1.000000 | 8.64327e-20 | 1.000000 |
| rad36     | 4.00073e-20 | 1.000000 | 4.00073e-20 | 1.000000 |
| rad22     | 2.69027e-20 | 1.000000 | 2.69027e-20 | 1.000000 |
| rad53     | 2.39428e-20 | 1.000000 | 2.39428e-20 | 1.000000 |
| rad64     | 2.49804e-21 | 1.000000 | 2.49804e-21 | 1.000000 |
| rad15     | 4.42937e-22 | 1.000000 | 4.42937e-22 | 1.000000 |
| rad61     | 3.06112e-23 | 1.000000 | 3.06112e-23 | 1.000000 |
| rad31     | 6.49191e-24 | 1.000000 | 6.49191e-24 | 1.000000 |
| rad20     | 1.47744e-24 | 1.000000 | 1.47744e-24 | 1.000000 |
| rad21     | 1.05778e-24 | 1.000000 | 1.05778e-24 | 1.000000 |
| rad56     | 6.65133e-25 | 1.000000 | 6.65133e-25 | 1.000000 |
| rad5      | 2.17000e-25 | 1.000000 | 2.17000e-25 | 1.000000 |
| rad18     | 1.12249e-25 | 1.000000 | 1.12249e-25 | 1.000000 |
| rad68syn  | 4.52726e-26 | 1.000000 | 4.52726e-26 | 1.000000 |
| rad68anti | 3.62590e-26 | 1.000000 | 3.62590e-26 | 1.000000 |
| rad47     | 6.69540e-27 | 1.000000 | 6.69540e-27 | 1.000000 |
| rad24     | 6.49339e-27 | 1.000000 | 6.49339e-27 | 1.000000 |
| rad12     | 4.49056e-27 | 1.000000 | 4.49056e-27 | 1.000000 |
| rad19anti | 6.17063e-28 | 1.000000 | 6.17063e-28 | 1.000000 |
| rad40syn  | 7.52882e-30 | 1.000000 | 7.52882e-30 | 1.000000 |
| rad40anti | 5.94710e-30 | 1.000000 | 5.94710e-30 | 1.000000 |
| rad73     | 5.43424e-31 | 1.000000 | 5.43424e-31 | 1.000000 |
| PAH8+H    | 6.67136e-32 | 1.000000 | 6.67136e-32 | 1.000000 |
| rad71     | 4.15236e-35 | 1.000000 | 4.15236e-35 | 1.000000 |
| rad19syn  | 4.98181e-38 | 1.000000 | 4.98181e-38 | 1.000000 |
| rad8      | 1.66817e-59 | 1.000000 | 1.66817e-59 | 1.000000 |

0.100000000 Pa, 150.000000 K

=====

| Rate constant             | True (fraction)        | Effective (fraction)   |
|---------------------------|------------------------|------------------------|
| Total                     | 6.34137e-15 (1.00 )    | 6.34137e-15 (1.00 )    |
| Formation of rad19        | 6.34135e-15 (1.000 )   | 6.34135e-15 (1.000 )   |
| H-abstraction to cyc2enyl | 1.81685e-20 (2.87e-06) | 1.81685e-20 (2.87e-06) |
| H-abstraction to cyclenyl | 2.23765e-25 (3.53e-11) | 2.23765e-25 (3.53e-11) |

| species                       | PYtrue      | Cumul    | PYeffective | Cumul    |
|-------------------------------|-------------|----------|-------------|----------|
| Indene+H                      | 0.999692    | 0.999692 | 0.999692    | 0.999692 |
| PhCHCCH2+H                    | 0.000289426 | 0.999982 | 0.000289426 | 0.999982 |
| PhCCH+CH3                     | 5.10632e-06 | 0.999987 | 5.10632e-06 | 0.999987 |
| C2H2+PhCH2                    | 3.84665e-06 | 0.999991 | 3.84665e-06 | 0.999991 |
| PhCCCH3+H                     | 2.96598e-06 | 0.999993 | 2.96598e-06 | 0.999993 |
| Benzene+cycloprop-2-enylidene | 2.86508e-06 | 0.999996 | 2.86508e-06 | 0.999996 |
| Ph+MeAc                       | 2.35894e-06 | 0.999999 | 2.35894e-06 | 0.999999 |
| rad67                         | 7.01467e-07 | 0.999999 | 7.01467e-07 | 0.999999 |
| rad35                         | 3.05655e-07 | 1.000000 | 3.05655e-07 | 1.000000 |
| Ph+Allene                     | 2.31693e-07 | 1.000000 | 2.31693e-07 | 1.000000 |
| PhCH2CCH+H                    | 3.07551e-08 | 1.000000 | 3.07551e-08 | 1.000000 |
| PAH7+H                        | 2.83626e-08 | 1.000000 | 2.83626e-08 | 1.000000 |
| rad39                         | 8.00339e-09 | 1.000000 | 8.00339e-09 | 1.000000 |
| rad37                         | 7.70232e-09 | 1.000000 | 7.70232e-09 | 1.000000 |
| rad30                         | 5.76576e-09 | 1.000000 | 5.76576e-09 | 1.000000 |
| PAH9+H                        | 4.16598e-10 | 1.000000 | 4.16598e-10 | 1.000000 |
| rad6                          | 2.03142e-10 | 1.000000 | 2.03142e-10 | 1.000000 |
| rad38                         | 1.84704e-10 | 1.000000 | 1.84704e-10 | 1.000000 |
| Benzene+cycloprop-1-enylidene | 3.52865e-11 | 1.000000 | 3.52865e-11 | 1.000000 |
| rad60syn                      | 2.92253e-11 | 1.000000 | 2.92253e-11 | 1.000000 |
| PAH10+CH3                     | 1.58889e-11 | 1.000000 | 1.58889e-11 | 1.000000 |
| rad60anti                     | 1.44685e-11 | 1.000000 | 1.44685e-11 | 1.000000 |
| PAH3+H                        | 1.41383e-11 | 1.000000 | 1.41383e-11 | 1.000000 |
| rad46                         | 1.15129e-11 | 1.000000 | 1.15129e-11 | 1.000000 |
| PhcycC3H3_A+H                 | 4.70529e-12 | 1.000000 | 4.70529e-12 | 1.000000 |
| rad59                         | 2.84644e-12 | 1.000000 | 2.84644e-12 | 1.000000 |
| rad43                         | 6.54897e-13 | 1.000000 | 6.54897e-13 | 1.000000 |

|                |             |         |             |         |
|----------------|-------------|---------|-------------|---------|
| rad54          | 5.59984e-13 | 1.00000 | 5.59984e-13 | 1.00000 |
| rad28          | 2.00449e-13 | 1.00000 | 2.00449e-13 | 1.00000 |
| rad2           | 1.89769e-13 | 1.00000 | 1.89769e-13 | 1.00000 |
| rad62          | 1.43362e-13 | 1.00000 | 1.43362e-13 | 1.00000 |
| rad50          | 9.95652e-14 | 1.00000 | 9.95652e-14 | 1.00000 |
| rad26          | 2.79816e-14 | 1.00000 | 2.79816e-14 | 1.00000 |
| Phenyl+cycC3H4 | 2.61242e-14 | 1.00000 | 0.00000     | 1.00000 |
| rad7           | 2.22378e-14 | 1.00000 | 2.22378e-14 | 1.00000 |
| rad1           | 1.24468e-14 | 1.00000 | 1.24468e-14 | 1.00000 |
| rad70          | 1.18551e-14 | 1.00000 | 1.18551e-14 | 1.00000 |
| rad10          | 1.14975e-14 | 1.00000 | 1.14975e-14 | 1.00000 |
| rad11          | 6.05041e-15 | 1.00000 | 6.05041e-15 | 1.00000 |
| rad55          | 5.21292e-15 | 1.00000 | 5.21292e-15 | 1.00000 |
| PhcycC3H3_B+H  | 4.08972e-15 | 1.00000 | 4.08972e-15 | 1.00000 |
| PAH1+H         | 3.58202e-15 | 1.00000 | 3.58202e-15 | 1.00000 |
| rad3           | 1.41703e-15 | 1.00000 | 1.41703e-15 | 1.00000 |
| rad52          | 7.77661e-16 | 1.00000 | 7.77661e-16 | 1.00000 |
| rad4           | 7.22270e-16 | 1.00000 | 7.22270e-16 | 1.00000 |
| rad58          | 3.40067e-16 | 1.00000 | 3.40067e-16 | 1.00000 |
| rad51          | 2.44530e-16 | 1.00000 | 2.44530e-16 | 1.00000 |
| rad34          | 1.90985e-16 | 1.00000 | 1.90985e-16 | 1.00000 |
| rad13          | 8.55011e-17 | 1.00000 | 8.55011e-17 | 1.00000 |
| rad41          | 3.79420e-17 | 1.00000 | 3.79420e-17 | 1.00000 |
| rad42          | 2.89053e-17 | 1.00000 | 2.89053e-17 | 1.00000 |
| rad23          | 2.46336e-17 | 1.00000 | 2.46336e-17 | 1.00000 |
| rad65          | 5.46177e-18 | 1.00000 | 5.46177e-18 | 1.00000 |
| rad9           | 6.81044e-19 | 1.00000 | 6.81044e-19 | 1.00000 |
| rad45          | 3.86181e-19 | 1.00000 | 3.86181e-19 | 1.00000 |
| rad33          | 1.58381e-19 | 1.00000 | 1.58381e-19 | 1.00000 |
| rad14          | 1.18735e-19 | 1.00000 | 1.18735e-19 | 1.00000 |
| rad27          | 1.10804e-19 | 1.00000 | 1.10804e-19 | 1.00000 |
| rad25          | 5.79783e-20 | 1.00000 | 5.79783e-20 | 1.00000 |
| rad53          | 4.78388e-20 | 1.00000 | 4.78388e-20 | 1.00000 |
| rad36          | 2.37296e-20 | 1.00000 | 2.37296e-20 | 1.00000 |
| rad22          | 1.59212e-20 | 1.00000 | 1.59212e-20 | 1.00000 |
| rad64          | 6.01151e-21 | 1.00000 | 6.01151e-21 | 1.00000 |
| rad15          | 3.33699e-22 | 1.00000 | 3.33699e-22 | 1.00000 |
| rad61          | 1.25737e-22 | 1.00000 | 1.25737e-22 | 1.00000 |
| rad31          | 4.47715e-24 | 1.00000 | 4.47715e-24 | 1.00000 |
| rad56          | 3.39956e-24 | 1.00000 | 3.39956e-24 | 1.00000 |
| rad20          | 1.02782e-24 | 1.00000 | 1.02782e-24 | 1.00000 |
| rad21          | 7.38790e-25 | 1.00000 | 7.38790e-25 | 1.00000 |
| rad68syn       | 2.60210e-25 | 1.00000 | 2.60210e-25 | 1.00000 |
| rad68anti      | 2.07339e-25 | 1.00000 | 2.07339e-25 | 1.00000 |
| rad5           | 1.31664e-25 | 1.00000 | 1.31664e-25 | 1.00000 |
| rad18          | 7.23256e-26 | 1.00000 | 7.23256e-26 | 1.00000 |
| rad47          | 6.60023e-27 | 1.00000 | 6.60023e-27 | 1.00000 |
| rad24          | 3.89724e-27 | 1.00000 | 3.89724e-27 | 1.00000 |
| rad12          | 3.42328e-27 | 1.00000 | 3.42328e-27 | 1.00000 |
| rad19anti      | 5.72590e-28 | 1.00000 | 5.72590e-28 | 1.00000 |
| rad40syn       | 8.87039e-29 | 1.00000 | 8.87039e-29 | 1.00000 |
| rad40anti      | 7.03419e-29 | 1.00000 | 7.03419e-29 | 1.00000 |
| rad73          | 5.43536e-30 | 1.00000 | 5.43536e-30 | 1.00000 |
| PAH8+H         | 1.26185e-30 | 1.00000 | 1.26185e-30 | 1.00000 |
| rad71          | 9.38049e-34 | 1.00000 | 9.38049e-34 | 1.00000 |
| rad19syn       | 1.23836e-37 | 1.00000 | 1.23836e-37 | 1.00000 |
| rad8           | 2.13328e-59 | 1.00000 | 2.13328e-59 | 1.00000 |

0.100000000 Pa, 160.000000 K

=====

| Rate constant             | True (fraction)        | Effective (fraction)   |
|---------------------------|------------------------|------------------------|
| Total                     | 7.84423e-15 (1.00 )    | 7.84423e-15 (1.00 )    |
| Formation of rad19        | 7.84418e-15 (1.000 )   | 7.84418e-15 (1.000 )   |
| H-abstraction to cyc2enyl | 5.05321e-20 (6.44e-06) | 5.05321e-20 (6.44e-06) |
| H-abstraction to cyclenyl | 1.29479e-24 (1.65e-10) | 1.29479e-24 (1.65e-10) |

| species                       | PYtrue      | Cumul    | PYeffective | Cumul    |
|-------------------------------|-------------|----------|-------------|----------|
| Indene+H                      | 0.999679    | 0.999679 | 0.999679    | 0.999679 |
| PhCHCCH2+H                    | 0.000298824 | 0.999977 | 0.000298824 | 0.999977 |
| Benzene+cycloprop-2-enylidene | 6.44194e-06 | 0.999984 | 6.44194e-06 | 0.999984 |
| PhCCH+CH3                     | 5.28347e-06 | 0.999989 | 5.28347e-06 | 0.999989 |
| C2H2+PhCH2                    | 4.01262e-06 | 0.999993 | 4.01262e-06 | 0.999993 |
| PhCCCH3+H                     | 3.08038e-06 | 0.999996 | 3.08038e-06 | 0.999996 |
| Ph+MeAc                       | 2.47129e-06 | 0.999999 | 2.47129e-06 | 0.999999 |
| rad67                         | 7.33216e-07 | 0.999999 | 7.33216e-07 | 0.999999 |
| rad35                         | 3.18903e-07 | 1.000000 | 3.18903e-07 | 1.000000 |
| Ph+Allene                     | 2.47519e-07 | 1.000000 | 2.47519e-07 | 1.000000 |
| PhCH2CCH+H                    | 3.32292e-08 | 1.000000 | 3.32292e-08 | 1.000000 |



|                               |             |         |             |         |
|-------------------------------|-------------|---------|-------------|---------|
| PAH7+H                        | 2.99981e-08 | 1.00000 | 2.99981e-08 | 1.00000 |
| rad39                         | 8.46470e-09 | 1.00000 | 8.46470e-09 | 1.00000 |
| rad37                         | 8.15972e-09 | 1.00000 | 8.15972e-09 | 1.00000 |
| rad30                         | 6.02502e-09 | 1.00000 | 6.02502e-09 | 1.00000 |
| PAH9+H                        | 4.41971e-10 | 1.00000 | 4.41971e-10 | 1.00000 |
| rad38                         | 1.97208e-10 | 1.00000 | 1.97208e-10 | 1.00000 |
| Benzene+cycloprop-1-enylidene | 1.65062e-10 | 1.00000 | 1.65062e-10 | 1.00000 |
| rad6                          | 1.38514e-10 | 1.00000 | 1.38514e-10 | 1.00000 |
| rad60syn                      | 3.11151e-11 | 1.00000 | 3.11151e-11 | 1.00000 |
| PAH10+CH3                     | 1.79672e-11 | 1.00000 | 1.79672e-11 | 1.00000 |
| rad60anti                     | 1.54298e-11 | 1.00000 | 1.54298e-11 | 1.00000 |
| PAH3+H                        | 1.54178e-11 | 1.00000 | 1.54178e-11 | 1.00000 |
| rad46                         | 1.23558e-11 | 1.00000 | 1.23558e-11 | 1.00000 |
| PhcycC3H3_A+H                 | 6.03919e-12 | 1.00000 | 6.03919e-12 | 1.00000 |
| rad59                         | 3.09225e-12 | 1.00000 | 3.09225e-12 | 1.00000 |
| rad43                         | 7.28611e-13 | 1.00000 | 7.28611e-13 | 1.00000 |
| rad54                         | 6.35387e-13 | 1.00000 | 6.35387e-13 | 1.00000 |
| rad62                         | 1.60004e-13 | 1.00000 | 1.60004e-13 | 1.00000 |
| rad28                         | 1.36173e-13 | 1.00000 | 1.36173e-13 | 1.00000 |
| rad2                          | 1.28656e-13 | 1.00000 | 1.28656e-13 | 1.00000 |
| rad50                         | 1.10734e-13 | 1.00000 | 1.10734e-13 | 1.00000 |
| Phenyl+cycC3H4                | 3.86829e-14 | 1.00000 | 0.00000     | 1.00000 |
| rad26                         | 1.90416e-14 | 1.00000 | 1.90416e-14 | 1.00000 |
| rad7                          | 1.50658e-14 | 1.00000 | 1.50658e-14 | 1.00000 |
| rad70                         | 1.39814e-14 | 1.00000 | 1.39814e-14 | 1.00000 |
| rad1                          | 8.48458e-15 | 1.00000 | 8.48458e-15 | 1.00000 |
| PhcycC3H3_B+H                 | 8.12725e-15 | 1.00000 | 8.12725e-15 | 1.00000 |
| rad10                         | 7.77598e-15 | 1.00000 | 7.77598e-15 | 1.00000 |
| rad55                         | 6.15599e-15 | 1.00000 | 6.15599e-15 | 1.00000 |
| PAH1+H                        | 4.46699e-15 | 1.00000 | 4.46699e-15 | 1.00000 |
| rad11                         | 4.09121e-15 | 1.00000 | 4.09121e-15 | 1.00000 |
| rad3                          | 9.57725e-16 | 1.00000 | 9.57725e-16 | 1.00000 |
| rad52                         | 8.88889e-16 | 1.00000 | 8.88889e-16 | 1.00000 |
| rad4                          | 4.88862e-16 | 1.00000 | 4.88862e-16 | 1.00000 |
| rad58                         | 4.06149e-16 | 1.00000 | 4.06149e-16 | 1.00000 |
| rad51                         | 2.88947e-16 | 1.00000 | 2.88947e-16 | 1.00000 |
| rad34                         | 2.39487e-16 | 1.00000 | 2.39487e-16 | 1.00000 |
| rad13                         | 5.83898e-17 | 1.00000 | 5.83898e-17 | 1.00000 |
| rad41                         | 4.96618e-17 | 1.00000 | 4.96618e-17 | 1.00000 |
| rad42                         | 3.69067e-17 | 1.00000 | 3.69067e-17 | 1.00000 |
| rad23                         | 1.51139e-17 | 1.00000 | 1.51139e-17 | 1.00000 |
| rad65                         | 6.55103e-18 | 1.00000 | 6.55103e-18 | 1.00000 |
| rad9                          | 5.36707e-19 | 1.00000 | 5.36707e-19 | 1.00000 |
| rad45                         | 2.35054e-19 | 1.00000 | 2.35054e-19 | 1.00000 |
| rad33                         | 1.08482e-19 | 1.00000 | 1.08482e-19 | 1.00000 |
| rad53                         | 9.16000e-20 | 1.00000 | 9.16000e-20 | 1.00000 |
| rad14                         | 8.05392e-20 | 1.00000 | 8.05392e-20 | 1.00000 |
| rad27                         | 7.52736e-20 | 1.00000 | 7.52736e-20 | 1.00000 |
| rad25                         | 3.96057e-20 | 1.00000 | 3.96057e-20 | 1.00000 |
| rad36                         | 1.44644e-20 | 1.00000 | 1.44644e-20 | 1.00000 |
| rad64                         | 1.34987e-20 | 1.00000 | 1.34987e-20 | 1.00000 |
| rad22                         | 9.68121e-21 | 1.00000 | 9.68121e-21 | 1.00000 |
| rad61                         | 4.45588e-22 | 1.00000 | 4.45588e-22 | 1.00000 |
| rad15                         | 2.62127e-22 | 1.00000 | 2.62127e-22 | 1.00000 |
| rad56                         | 1.45246e-23 | 1.00000 | 1.45246e-23 | 1.00000 |
| rad31                         | 3.15525e-24 | 1.00000 | 3.15525e-24 | 1.00000 |
| rad68syn                      | 1.22606e-24 | 1.00000 | 1.22606e-24 | 1.00000 |
| rad68anti                     | 9.71712e-25 | 1.00000 | 9.71712e-25 | 1.00000 |
| rad20                         | 7.31549e-25 | 1.00000 | 7.31549e-25 | 1.00000 |
| rad21                         | 5.27908e-25 | 1.00000 | 5.27908e-25 | 1.00000 |
| rad5                          | 8.24433e-26 | 1.00000 | 8.24433e-26 | 1.00000 |
| rad18                         | 4.79123e-26 | 1.00000 | 4.79123e-26 | 1.00000 |
| rad47                         | 6.59247e-27 | 1.00000 | 6.59247e-27 | 1.00000 |
| rad12                         | 2.72120e-27 | 1.00000 | 2.72120e-27 | 1.00000 |
| rad24                         | 2.40278e-27 | 1.00000 | 2.40278e-27 | 1.00000 |
| rad40syn                      | 7.78939e-28 | 1.00000 | 7.78939e-28 | 1.00000 |
| rad19anti                     | 6.98912e-28 | 1.00000 | 6.98912e-28 | 1.00000 |
| rad40anti                     | 6.20121e-28 | 1.00000 | 6.20121e-28 | 1.00000 |
| rad73                         | 4.20052e-29 | 1.00000 | 4.20052e-29 | 1.00000 |
| PAH8+H                        | 1.67874e-29 | 1.00000 | 1.67874e-29 | 1.00000 |
| rad71                         | 1.45581e-32 | 1.00000 | 1.45581e-32 | 1.00000 |
| rad19syn                      | 3.23538e-37 | 1.00000 | 3.23538e-37 | 1.00000 |
| rad8                          | 2.89314e-59 | 1.00000 | 2.89314e-59 | 1.00000 |

0.100000000 Pa, 170.000000 K

=====

| Rate constant      | True (fraction)      | Effective (fraction) |
|--------------------|----------------------|----------------------|
| Total              | 9.49598e-15 (1.00 )  | 9.49598e-15 (1.00 )  |
| Formation of rad19 | 9.49586e-15 (1.000 ) | 9.49586e-15 (1.000 ) |

H-abstraction to cyc2enyl | 1.24279e-19 (1.31e-05) 1.24279e-19 (1.31e-05)  
H-abstraction to cyc1enyl | 6.08025e-24 (6.40e-10) 6.08025e-24 (6.40e-10)

| species                       | PYtrue      | Cumul    | PYeffective | Cumul    |
|-------------------------------|-------------|----------|-------------|----------|
| Indene+H                      | 0.999661    | 0.999661 | 0.999661    | 0.999661 |
| PhCHCCH2+H                    | 0.000309018 | 0.999970 | 0.000309018 | 0.999970 |
| Benzene+cycloprop-2-enylidene | 1.30875e-05 | 0.999983 | 1.30875e-05 | 0.999983 |
| PhCCH+CH3                     | 5.47525e-06 | 0.999988 | 5.47525e-06 | 0.999988 |
| C2H2+PhCH2                    | 4.19431e-06 | 0.999993 | 4.19431e-06 | 0.999993 |
| PhCCCH3+H                     | 3.20506e-06 | 0.999996 | 3.20506e-06 | 0.999996 |
| Ph+MeAc                       | 2.59492e-06 | 0.999998 | 2.59492e-06 | 0.999998 |
| rad67                         | 7.68113e-07 | 0.999999 | 7.68113e-07 | 0.999999 |
| rad35                         | 3.33435e-07 | 1.000000 | 3.33435e-07 | 1.000000 |
| Ph+Allene                     | 2.65279e-07 | 1.000000 | 2.65279e-07 | 1.000000 |
| PhCH2CCH+H                    | 3.60405e-08 | 1.000000 | 3.60405e-08 | 1.000000 |
| PAH7+H                        | 3.18118e-08 | 1.000000 | 3.18118e-08 | 1.000000 |
| rad39                         | 8.97591e-09 | 1.000000 | 8.97591e-09 | 1.000000 |
| rad37                         | 8.67028e-09 | 1.000000 | 8.67028e-09 | 1.000000 |
| rad30                         | 6.31029e-09 | 1.000000 | 6.31029e-09 | 1.000000 |
| Benzene+cycloprop-1-enylidene | 6.40297e-10 | 1.000000 | 6.40297e-10 | 1.000000 |
| PAH9+H                        | 4.70325e-10 | 1.000000 | 4.70325e-10 | 1.000000 |
| rad38                         | 2.11308e-10 | 1.000000 | 2.11308e-10 | 1.000000 |
| rad6                          | 9.59288e-11 | 1.000000 | 9.59288e-11 | 1.000000 |
| rad60syn                      | 3.32399e-11 | 1.000000 | 3.32399e-11 | 1.000000 |
| PAH10+CH3                     | 2.04565e-11 | 1.000000 | 2.04565e-11 | 1.000000 |
| PAH3+H                        | 1.68961e-11 | 1.000000 | 1.68961e-11 | 1.000000 |
| rad60anti                     | 1.65129e-11 | 1.000000 | 1.65129e-11 | 1.000000 |
| rad46                         | 1.33102e-11 | 1.000000 | 1.33102e-11 | 1.000000 |
| PhcycC3H3_A+H                 | 7.80787e-12 | 1.000000 | 7.80787e-12 | 1.000000 |
| rad59                         | 3.37492e-12 | 1.000000 | 3.37492e-12 | 1.000000 |
| rad43                         | 8.15166e-13 | 1.000000 | 8.15166e-13 | 1.000000 |
| rad54                         | 7.25548e-13 | 1.000000 | 7.25548e-13 | 1.000000 |
| rad62                         | 1.79546e-13 | 1.000000 | 1.79546e-13 | 1.000000 |
| rad50                         | 1.23897e-13 | 1.000000 | 1.23897e-13 | 1.000000 |
| rad28                         | 9.39878e-14 | 1.000000 | 9.39878e-14 | 1.000000 |
| rad2                          | 8.86274e-14 | 1.000000 | 8.86274e-14 | 1.000000 |
| Phenyl+cycC3H4                | 5.71891e-14 | 1.000000 | 0.00000     | 1.000000 |
| rad70                         | 1.66253e-14 | 1.000000 | 1.66253e-14 | 1.000000 |
| PhcycC3H3_B+H                 | 1.54795e-14 | 1.000000 | 1.54795e-14 | 1.000000 |
| rad26                         | 1.31624e-14 | 1.000000 | 1.31624e-14 | 1.000000 |
| rad7                          | 1.03727e-14 | 1.000000 | 1.03727e-14 | 1.000000 |
| rad55                         | 7.32821e-15 | 1.000000 | 7.32821e-15 | 1.000000 |
| rad1                          | 5.87961e-15 | 1.000000 | 5.87961e-15 | 1.000000 |
| PAH1+H                        | 5.62611e-15 | 1.000000 | 5.62611e-15 | 1.000000 |
| rad10                         | 5.34504e-15 | 1.000000 | 5.34504e-15 | 1.000000 |
| rad11                         | 2.81188e-15 | 1.000000 | 2.81188e-15 | 1.000000 |
| rad52                         | 1.02390e-15 | 1.000000 | 1.02390e-15 | 1.000000 |
| rad3                          | 6.57962e-16 | 1.000000 | 6.57962e-16 | 1.000000 |
| rad58                         | 4.89800e-16 | 1.000000 | 4.89800e-16 | 1.000000 |
| rad51                         | 3.44746e-16 | 1.000000 | 3.44746e-16 | 1.000000 |
| rad4                          | 3.36383e-16 | 1.000000 | 3.36383e-16 | 1.000000 |
| rad34                         | 3.03271e-16 | 1.000000 | 3.03271e-16 | 1.000000 |
| rad41                         | 6.55328e-17 | 1.000000 | 6.55328e-17 | 1.000000 |
| rad42                         | 4.74854e-17 | 1.000000 | 4.74854e-17 | 1.000000 |
| rad13                         | 4.05131e-17 | 1.000000 | 4.05131e-17 | 1.000000 |
| rad23                         | 9.48809e-18 | 1.000000 | 9.48809e-18 | 1.000000 |
| rad65                         | 7.93799e-18 | 1.000000 | 7.93799e-18 | 1.000000 |
| rad9                          | 4.38973e-19 | 1.000000 | 4.38973e-19 | 1.000000 |
| rad53                         | 1.69711e-19 | 1.000000 | 1.69711e-19 | 1.000000 |
| rad45                         | 1.46507e-19 | 1.000000 | 1.46507e-19 | 1.000000 |
| rad33                         | 7.54877e-20 | 1.000000 | 7.54877e-20 | 1.000000 |
| rad14                         | 5.55328e-20 | 1.000000 | 5.55328e-20 | 1.000000 |
| rad27                         | 5.19758e-20 | 1.000000 | 5.19758e-20 | 1.000000 |
| rad64                         | 2.86833e-20 | 1.000000 | 2.86833e-20 | 1.000000 |
| rad25                         | 2.74893e-20 | 1.000000 | 2.74893e-20 | 1.000000 |
| rad36                         | 9.03131e-21 | 1.000000 | 9.03131e-21 | 1.000000 |
| rad22                         | 6.02858e-21 | 1.000000 | 6.02858e-21 | 1.000000 |
| rad61                         | 1.40194e-21 | 1.000000 | 1.40194e-21 | 1.000000 |
| rad15                         | 2.13779e-22 | 1.000000 | 2.13779e-22 | 1.000000 |
| rad56                         | 5.36984e-23 | 1.000000 | 5.36984e-23 | 1.000000 |
| rad68syn                      | 4.91979e-24 | 1.000000 | 4.91979e-24 | 1.000000 |
| rad68anti                     | 3.87672e-24 | 1.000000 | 3.87672e-24 | 1.000000 |
| rad31                         | 2.26784e-24 | 1.000000 | 2.26784e-24 | 1.000000 |
| rad20                         | 5.31276e-25 | 1.000000 | 5.31276e-25 | 1.000000 |
| rad21                         | 3.84900e-25 | 1.000000 | 3.84900e-25 | 1.000000 |
| rad5                          | 5.30830e-26 | 1.000000 | 5.30830e-26 | 1.000000 |
| rad18                         | 3.25191e-26 | 1.000000 | 3.25191e-26 | 1.000000 |
| rad47                         | 6.67065e-27 | 1.000000 | 6.67065e-27 | 1.000000 |
| rad40syn                      | 5.38357e-27 | 1.000000 | 5.38357e-27 | 1.000000 |

|           |             |          |             |          |
|-----------|-------------|----------|-------------|----------|
| rad40anti | 4.30057e-27 | 1.000000 | 4.30057e-27 | 1.000000 |
| rad12     | 2.24614e-27 | 1.000000 | 2.24614e-27 | 1.000000 |
| rad24     | 1.51687e-27 | 1.000000 | 1.51687e-27 | 1.000000 |
| rad19anti | 1.19280e-27 | 1.000000 | 1.19280e-27 | 1.000000 |
| rad73     | 2.63041e-28 | 1.000000 | 2.63041e-28 | 1.000000 |
| PAH8+H    | 1.67523e-28 | 1.000000 | 1.67523e-28 | 1.000000 |
| rad71     | 1.66338e-31 | 1.000000 | 1.66338e-31 | 1.000000 |
| rad19syn  | 8.89196e-37 | 1.000000 | 8.89196e-37 | 1.000000 |
| rad8      | 4.13221e-59 | 1.000000 | 4.13221e-59 | 1.000000 |

0.100000000 Pa, 180.000000 K

| Rate constant             | True (fraction)        | Effective (fraction)   |
|---------------------------|------------------------|------------------------|
| Total                     | 1.12884e-14 (1.00 )    | 1.12884e-14 (1.00 )    |
| Formation of rad19        | 1.12881e-14 (1.000 )   | 1.12881e-14 (1.000 )   |
| H-abstraction to cyc2enyl | 2.75916e-19 (2.44e-05) | 2.75916e-19 (2.44e-05) |
| H-abstraction to cyclenyl | 2.39955e-23 (2.13e-09) | 2.39955e-23 (2.13e-09) |

| species                       | PYtrue      | Cumul    | PYeffective | Cumul    |
|-------------------------------|-------------|----------|-------------|----------|
| Indene+H                      | 0.999638    | 0.999638 | 0.999638    | 0.999638 |
| PhCHCCH2+H                    | 0.000320096 | 0.999958 | 0.000320096 | 0.999958 |
| Benzene+cycloprop-2-enylidene | 2.44424e-05 | 0.999982 | 2.44424e-05 | 0.999982 |
| PhCCH+CH3                     | 5.68328e-06 | 0.999988 | 5.68328e-06 | 0.999988 |
| C2H2+PhCH2                    | 4.39371e-06 | 0.999992 | 4.39371e-06 | 0.999992 |
| PhCCCH3+H                     | 3.34126e-06 | 0.999996 | 3.34126e-06 | 0.999996 |
| Ph+MeAc                       | 2.73130e-06 | 0.999998 | 2.73130e-06 | 0.999998 |
| rad67                         | 8.06564e-07 | 0.999999 | 8.06564e-07 | 0.999999 |
| rad35                         | 3.49415e-07 | 0.999999 | 3.49415e-07 | 0.999999 |
| Ph+Allene                     | 2.85292e-07 | 1.000000 | 2.85292e-07 | 1.000000 |
| PhCH2CCH+H                    | 3.92503e-08 | 1.000000 | 3.92503e-08 | 1.000000 |
| PAH7+H                        | 3.38307e-08 | 1.000000 | 3.38307e-08 | 1.000000 |
| rad39                         | 9.54456e-09 | 1.000000 | 9.54456e-09 | 1.000000 |
| rad37                         | 9.24201e-09 | 1.000000 | 9.24201e-09 | 1.000000 |
| rad30                         | 6.62504e-09 | 1.000000 | 6.62504e-09 | 1.000000 |
| Benzene+cycloprop-1-enylidene | 2.12567e-09 | 1.000000 | 2.12567e-09 | 1.000000 |
| PAH9+H                        | 5.02136e-10 | 1.000000 | 5.02136e-10 | 1.000000 |
| rad38                         | 2.27279e-10 | 1.000000 | 2.27279e-10 | 1.000000 |
| rad6                          | 6.73509e-11 | 1.000000 | 6.73509e-11 | 1.000000 |
| rad60syn                      | 3.56377e-11 | 1.000000 | 3.56377e-11 | 1.000000 |
| PAH10+CH3                     | 2.34562e-11 | 1.000000 | 2.34562e-11 | 1.000000 |
| PAH3+H                        | 1.86124e-11 | 1.000000 | 1.86124e-11 | 1.000000 |
| rad60anti                     | 1.77376e-11 | 1.000000 | 1.77376e-11 | 1.000000 |
| rad46                         | 1.43957e-11 | 1.000000 | 1.43957e-11 | 1.000000 |
| PhcycC3H3_A+H                 | 1.01635e-11 | 1.000000 | 1.01635e-11 | 1.000000 |
| rad59                         | 3.70152e-12 | 1.000000 | 3.70152e-12 | 1.000000 |
| rad43                         | 9.17306e-13 | 1.000000 | 9.17306e-13 | 1.000000 |
| rad54                         | 8.34063e-13 | 1.000000 | 8.34063e-13 | 1.000000 |
| rad62                         | 2.02600e-13 | 1.000000 | 2.02600e-13 | 1.000000 |
| rad50                         | 1.39512e-13 | 1.000000 | 1.39512e-13 | 1.000000 |
| Phenyl+cycC3H4                | 8.44565e-14 | 1.000000 | 0.000000    | 1.000000 |
| rad28                         | 6.57818e-14 | 1.000000 | 6.57818e-14 | 1.000000 |
| rad2                          | 6.19156e-14 | 1.000000 | 6.19156e-14 | 1.000000 |
| PhcycC3H3_B+H                 | 2.84772e-14 | 1.000000 | 2.84772e-14 | 1.000000 |
| rad70                         | 1.99366e-14 | 1.000000 | 1.99366e-14 | 1.000000 |
| rad26                         | 9.22460e-15 | 1.000000 | 9.22460e-15 | 1.000000 |
| rad55                         | 8.79585e-15 | 1.000000 | 8.79585e-15 | 1.000000 |
| rad7                          | 7.24320e-15 | 1.000000 | 7.24320e-15 | 1.000000 |
| PAH1+H                        | 7.15561e-15 | 1.000000 | 7.15561e-15 | 1.000000 |
| rad1                          | 4.13418e-15 | 1.000000 | 4.13418e-15 | 1.000000 |
| rad10                         | 3.72681e-15 | 1.000000 | 3.72681e-15 | 1.000000 |
| rad11                         | 1.96046e-15 | 1.000000 | 1.96046e-15 | 1.000000 |
| rad52                         | 1.18902e-15 | 1.000000 | 1.18902e-15 | 1.000000 |
| rad58                         | 5.96502e-16 | 1.000000 | 5.96502e-16 | 1.000000 |
| rad3                          | 4.58568e-16 | 1.000000 | 4.58568e-16 | 1.000000 |
| rad51                         | 4.15469e-16 | 1.000000 | 4.15469e-16 | 1.000000 |
| rad34                         | 3.87787e-16 | 1.000000 | 3.87787e-16 | 1.000000 |
| rad4                          | 2.34848e-16 | 1.000000 | 2.34848e-16 | 1.000000 |
| rad41                         | 8.71373e-17 | 1.000000 | 8.71373e-17 | 1.000000 |
| rad42                         | 6.15393e-17 | 1.000000 | 6.15393e-17 | 1.000000 |
| rad13                         | 2.85042e-17 | 1.000000 | 2.85042e-17 | 1.000000 |
| rad65                         | 9.71978e-18 | 1.000000 | 9.71978e-18 | 1.000000 |
| rad23                         | 6.07829e-18 | 1.000000 | 6.07829e-18 | 1.000000 |
| rad9                          | 3.71465e-19 | 1.000000 | 3.71465e-19 | 1.000000 |
| rad53                         | 3.06340e-19 | 1.000000 | 3.06340e-19 | 1.000000 |
| rad45                         | 9.32568e-20 | 1.000000 | 9.32568e-20 | 1.000000 |
| rad64                         | 5.82851e-20 | 1.000000 | 5.82851e-20 | 1.000000 |
| rad33                         | 5.32637e-20 | 1.000000 | 5.32637e-20 | 1.000000 |
| rad14                         | 3.88457e-20 | 1.000000 | 3.88457e-20 | 1.000000 |

|           |             |          |             |          |
|-----------|-------------|----------|-------------|----------|
| rad27     | 3.64067e-20 | 1.000000 | 3.64067e-20 | 1.000000 |
| rad25     | 1.93484e-20 | 1.000000 | 1.93484e-20 | 1.000000 |
| rad36     | 5.76067e-21 | 1.000000 | 5.76067e-21 | 1.000000 |
| rad61     | 4.00254e-21 | 1.000000 | 4.00254e-21 | 1.000000 |
| rad22     | 3.83377e-21 | 1.000000 | 3.83377e-21 | 1.000000 |
| rad15     | 1.80439e-22 | 1.000000 | 1.80439e-22 | 1.000000 |
| rad56     | 1.76417e-22 | 1.000000 | 1.76417e-22 | 1.000000 |
| rad68syn  | 1.73134e-23 | 1.000000 | 1.73134e-23 | 1.000000 |
| rad68anti | 1.35586e-23 | 1.000000 | 1.35586e-23 | 1.000000 |
| rad31     | 1.65979e-24 | 1.000000 | 1.65979e-24 | 1.000000 |
| rad20     | 3.92804e-25 | 1.000000 | 3.92804e-25 | 1.000000 |
| rad21     | 2.85714e-25 | 1.000000 | 2.85714e-25 | 1.000000 |
| rad5      | 3.50415e-26 | 1.000000 | 3.50415e-26 | 1.000000 |
| rad40syn  | 3.05470e-26 | 1.000000 | 3.05470e-26 | 1.000000 |
| rad40anti | 2.44655e-26 | 1.000000 | 2.44655e-26 | 1.000000 |
| rad18     | 2.25484e-26 | 1.000000 | 2.25484e-26 | 1.000000 |
| rad47     | 6.83799e-27 | 1.000000 | 6.83799e-27 | 1.000000 |
| rad19anti | 2.66104e-27 | 1.000000 | 2.66104e-27 | 1.000000 |
| rad12     | 1.91921e-27 | 1.000000 | 1.91921e-27 | 1.000000 |
| rad73     | 1.38486e-27 | 1.000000 | 1.38486e-27 | 1.000000 |
| PAH8+H    | 1.31988e-27 | 1.000000 | 1.31988e-27 | 1.000000 |
| rad24     | 9.77902e-28 | 1.000000 | 9.77902e-28 | 1.000000 |
| rad71     | 1.48409e-30 | 1.000000 | 1.48409e-30 | 1.000000 |
| rad19syn  | 2.57212e-36 | 1.000000 | 2.57212e-36 | 1.000000 |
| rad8      | 6.17486e-59 | 1.000000 | 6.17486e-59 | 1.000000 |

0.100000000 Pa, 190.000000 K

| Rate constant             | True (fraction)        | Effective (fraction)   |
|---------------------------|------------------------|------------------------|
| Total                     | 1.32132e-14 (1.00 )    | 1.32132e-14 (1.00 )    |
| Formation of rad19        | 1.32126e-14 (1.000 )   | 1.32126e-14 (1.000 )   |
| H-abstraction to cyc2enyl | 5.62053e-19 (4.25e-05) | 5.62053e-19 (4.25e-05) |
| H-abstraction to cyc1enyl | 8.18073e-23 (6.19e-09) | 8.18073e-23 (6.19e-09) |

| species                       | PYtrue      | Cumul    | PYeffective | Cumul    |
|-------------------------------|-------------|----------|-------------|----------|
| Indene+H                      | 0.999606    | 0.999606 | 0.999606    | 0.999606 |
| PhCHCCH2+H                    | 0.000332156 | 0.999939 | 0.000332156 | 0.999939 |
| Benzene+cycloprop-2-enylidene | 4.25373e-05 | 0.999981 | 4.25373e-05 | 0.999981 |
| PhCCH+CH3                     | 5.90927e-06 | 0.999987 | 5.90927e-06 | 0.999987 |
| C2H2+PhCH2                    | 4.61305e-06 | 0.999992 | 4.61305e-06 | 0.999992 |
| PhCCH3+H                      | 3.49029e-06 | 0.999995 | 3.49029e-06 | 0.999995 |
| Ph+MeAc                       | 2.88210e-06 | 0.999998 | 2.88210e-06 | 0.999998 |
| rad67                         | 8.49025e-07 | 0.999999 | 8.49025e-07 | 0.999999 |
| rad35                         | 3.67025e-07 | 0.999999 | 3.67025e-07 | 0.999999 |
| Ph+Allene                     | 3.07929e-07 | 1.000000 | 3.07929e-07 | 1.000000 |
| PhCH2CCH+H                    | 4.29303e-08 | 1.000000 | 4.29303e-08 | 1.000000 |
| PAH7+H                        | 3.60853e-08 | 1.000000 | 3.60853e-08 | 1.000000 |
| rad39                         | 1.01791e-08 | 1.000000 | 1.01791e-08 | 1.000000 |
| rad37                         | 9.88406e-09 | 1.000000 | 9.88406e-09 | 1.000000 |
| rad30                         | 6.97313e-09 | 1.000000 | 6.97313e-09 | 1.000000 |
| Benzene+cycloprop-1-enylidene | 6.19133e-09 | 1.000000 | 6.19133e-09 | 1.000000 |
| PAH9+H                        | 5.37951e-10 | 1.000000 | 5.37951e-10 | 1.000000 |
| rad38                         | 2.45443e-10 | 1.000000 | 2.45443e-10 | 1.000000 |
| rad6                          | 4.78601e-11 | 1.000000 | 4.78601e-11 | 1.000000 |
| rad60syn                      | 3.83530e-11 | 1.000000 | 3.83530e-11 | 1.000000 |
| PAH10+CH3                     | 2.70904e-11 | 1.000000 | 2.70904e-11 | 1.000000 |
| PAH3+H                        | 2.06142e-11 | 1.000000 | 2.06142e-11 | 1.000000 |
| rad60anti                     | 1.91272e-11 | 1.000000 | 1.91272e-11 | 1.000000 |
| rad46                         | 1.56356e-11 | 1.000000 | 1.56356e-11 | 1.000000 |
| PhcycC3H3_A+H                 | 1.33114e-11 | 1.000000 | 1.33114e-11 | 1.000000 |
| rad59                         | 4.08050e-12 | 1.000000 | 4.08050e-12 | 1.000000 |
| rad43                         | 1.03838e-12 | 1.000000 | 1.03838e-12 | 1.000000 |
| rad54                         | 9.65442e-13 | 1.000000 | 9.65442e-13 | 1.000000 |
| rad62                         | 2.29914e-13 | 1.000000 | 2.29914e-13 | 1.000000 |
| rad50                         | 1.58145e-13 | 1.000000 | 1.58145e-13 | 1.000000 |
| Phenyl+cycC3H4                | 1.24603e-13 | 1.000000 | 0.000000    | 1.000000 |
| PhcycC3H3_B+H                 | 5.08969e-14 | 1.000000 | 5.08969e-14 | 1.000000 |
| rad28                         | 4.66098e-14 | 1.000000 | 4.66098e-14 | 1.000000 |
| rad2                          | 4.37936e-14 | 1.000000 | 4.37936e-14 | 1.000000 |
| rad70                         | 2.41113e-14 | 1.000000 | 2.41113e-14 | 1.000000 |
| rad55                         | 1.06451e-14 | 1.000000 | 1.06451e-14 | 1.000000 |
| PAH1+H                        | 9.18687e-15 | 1.000000 | 9.18687e-15 | 1.000000 |
| rad26                         | 6.54385e-15 | 1.000000 | 6.54385e-15 | 1.000000 |
| rad7                          | 5.12140e-15 | 1.000000 | 5.12140e-15 | 1.000000 |
| rad1                          | 2.94479e-15 | 1.000000 | 2.94479e-15 | 1.000000 |
| rad10                         | 2.63144e-15 | 1.000000 | 2.63144e-15 | 1.000000 |
| rad52                         | 1.39241e-15 | 1.000000 | 1.39241e-15 | 1.000000 |
| rad11                         | 1.38420e-15 | 1.000000 | 1.38420e-15 | 1.000000 |

|           |             |          |             |          |
|-----------|-------------|----------|-------------|----------|
| rad58     | 7.33561e-16 | 1.000000 | 7.33561e-16 | 1.000000 |
| rad51     | 5.05832e-16 | 1.000000 | 5.05832e-16 | 1.000000 |
| rad34     | 5.00509e-16 | 1.000000 | 5.00509e-16 | 1.000000 |
| rad3      | 3.23684e-16 | 1.000000 | 3.23684e-16 | 1.000000 |
| rad4      | 1.66085e-16 | 1.000000 | 1.66085e-16 | 1.000000 |
| rad41     | 1.16667e-16 | 1.000000 | 1.16667e-16 | 1.000000 |
| rad42     | 8.02819e-17 | 1.000000 | 8.02819e-17 | 1.000000 |
| rad13     | 2.03034e-17 | 1.000000 | 2.03034e-17 | 1.000000 |
| rad65     | 1.20275e-17 | 1.000000 | 1.20275e-17 | 1.000000 |
| rad23     | 3.96479e-18 | 1.000000 | 3.96479e-18 | 1.000000 |
| rad53     | 5.41373e-19 | 1.000000 | 5.41373e-19 | 1.000000 |
| rad9      | 3.24531e-19 | 1.000000 | 3.24531e-19 | 1.000000 |
| rad64     | 1.14154e-19 | 1.000000 | 1.14154e-19 | 1.000000 |
| rad45     | 6.04839e-20 | 1.000000 | 6.04839e-20 | 1.000000 |
| rad33     | 3.80475e-20 | 1.000000 | 3.80475e-20 | 1.000000 |
| rad14     | 2.75207e-20 | 1.000000 | 2.75207e-20 | 1.000000 |
| rad27     | 2.58265e-20 | 1.000000 | 2.58265e-20 | 1.000000 |
| rad25     | 1.37877e-20 | 1.000000 | 1.37877e-20 | 1.000000 |
| rad61     | 1.05459e-20 | 1.000000 | 1.05459e-20 | 1.000000 |
| rad36     | 3.74532e-21 | 1.000000 | 3.74532e-21 | 1.000000 |
| rad22     | 2.48399e-21 | 1.000000 | 2.48399e-21 | 1.000000 |
| rad56     | 5.25785e-22 | 1.000000 | 5.25785e-22 | 1.000000 |
| rad15     | 1.57280e-22 | 1.000000 | 1.57280e-22 | 1.000000 |
| rad68syn  | 5.46730e-23 | 1.000000 | 5.46730e-23 | 1.000000 |
| rad68anti | 4.25359e-23 | 1.000000 | 4.25359e-23 | 1.000000 |
| rad31     | 1.23543e-24 | 1.000000 | 1.23543e-24 | 1.000000 |
| rad20     | 2.95121e-25 | 1.000000 | 2.95121e-25 | 1.000000 |
| rad21     | 2.15531e-25 | 1.000000 | 2.15531e-25 | 1.000000 |
| rad40syn  | 1.47058e-25 | 1.000000 | 1.47058e-25 | 1.000000 |
| rad40anti | 1.17975e-25 | 1.000000 | 1.17975e-25 | 1.000000 |
| rad5      | 2.36582e-26 | 1.000000 | 2.36582e-26 | 1.000000 |
| rad18     | 1.59345e-26 | 1.000000 | 1.59345e-26 | 1.000000 |
| PAH8+H    | 8.52667e-27 | 1.000000 | 8.52667e-27 | 1.000000 |
| rad47     | 7.10244e-27 | 1.000000 | 7.10244e-27 | 1.000000 |
| rad19anti | 6.95017e-27 | 1.000000 | 6.95017e-27 | 1.000000 |
| rad73     | 6.30885e-27 | 1.000000 | 6.30885e-27 | 1.000000 |
| rad12     | 1.69401e-27 | 1.000000 | 1.69401e-27 | 1.000000 |
| rad24     | 6.42375e-28 | 1.000000 | 6.42375e-28 | 1.000000 |
| rad71     | 1.07523e-29 | 1.000000 | 1.07523e-29 | 1.000000 |
| rad19syn  | 7.83213e-36 | 1.000000 | 7.83213e-36 | 1.000000 |
| rad8      | 9.59891e-59 | 1.000000 | 9.59891e-59 | 1.000000 |

0.100000000 Pa, 200.000000 K

=====

| Rate constant             | True (fraction)        | Effective (fraction)   |
|---------------------------|------------------------|------------------------|
| Total                     | 1.52621e-14 (1.00 )    | 1.52621e-14 (1.00 )    |
| Formation of rad19        | 1.52610e-14 (1.000 )   | 1.52610e-14 (1.000 )   |
| H-abstraction to cyc2enyl | 1.06427e-18 (6.97e-05) | 1.06427e-18 (6.97e-05) |
| H-abstraction to cyclenyl | 2.46309e-22 (1.61e-08) | 2.46309e-22 (1.61e-08) |

| species                       | PYtrue      | Cumul    | PYeffective | Cumul    |
|-------------------------------|-------------|----------|-------------|----------|
| Indene+H                      | 0.999565    | 0.999565 | 0.999565    | 0.999565 |
| PhCHCCH2+H                    | 0.000345302 | 0.999911 | 0.000345302 | 0.999911 |
| Benzene+cycloprop-2-enylidene | 6.97330e-05 | 0.999980 | 6.97330e-05 | 0.999980 |
| PhCCH+CH3                     | 6.15504e-06 | 0.999986 | 6.15504e-06 | 0.999986 |
| C2H2+PhCH2                    | 4.85477e-06 | 0.999991 | 4.85477e-06 | 0.999991 |
| PhCCCH3+H                     | 3.65360e-06 | 0.999995 | 3.65360e-06 | 0.999995 |
| Ph+MeAc                       | 3.04911e-06 | 0.999998 | 3.04911e-06 | 0.999998 |
| rad67                         | 8.95995e-07 | 0.999999 | 8.95995e-07 | 0.999999 |
| rad35                         | 3.86464e-07 | 0.999999 | 3.86464e-07 | 0.999999 |
| Ph+Allene                     | 3.33616e-07 | 1.000000 | 3.33616e-07 | 1.000000 |
| PhCH2CCH+H                    | 4.71648e-08 | 1.000000 | 4.71648e-08 | 1.000000 |
| PAH7+H                        | 3.86097e-08 | 1.000000 | 3.86097e-08 | 1.000000 |
| Benzene+cycloprop-1-enylidene | 1.61386e-08 | 1.000000 | 1.61386e-08 | 1.000000 |
| rad39                         | 1.08888e-08 | 1.000000 | 1.08888e-08 | 1.000000 |
| rad37                         | 1.06069e-08 | 1.000000 | 1.06069e-08 | 1.000000 |
| rad30                         | 7.35885e-09 | 1.000000 | 7.35885e-09 | 1.000000 |
| PAH9+H                        | 5.78399e-10 | 1.000000 | 5.78399e-10 | 1.000000 |
| rad38                         | 2.66168e-10 | 1.000000 | 2.66168e-10 | 1.000000 |
| rad60syn                      | 4.14363e-11 | 1.000000 | 4.14363e-11 | 1.000000 |
| rad6                          | 3.43748e-11 | 1.000000 | 3.43748e-11 | 1.000000 |
| PAH10+CH3                     | 3.15150e-11 | 1.000000 | 3.15150e-11 | 1.000000 |
| PAH3+H                        | 2.29586e-11 | 1.000000 | 2.29586e-11 | 1.000000 |
| rad60anti                     | 2.07086e-11 | 1.000000 | 2.07086e-11 | 1.000000 |
| PhcycC3H3_A+H                 | 1.75290e-11 | 1.000000 | 1.75290e-11 | 1.000000 |
| rad46                         | 1.70569e-11 | 1.000000 | 1.70569e-11 | 1.000000 |
| rad59                         | 4.52192e-12 | 1.000000 | 4.52192e-12 | 1.000000 |
| rad43                         | 1.18244e-12 | 1.000000 | 1.18244e-12 | 1.000000 |

|                |             |          |             |          |
|----------------|-------------|----------|-------------|----------|
| rad54          | 1.12533e-12 | 1.000000 | 1.12533e-12 | 1.000000 |
| rad62          | 2.62393e-13 | 1.000000 | 2.62393e-13 | 1.000000 |
| Phenyl+cycC3H4 | 1.83626e-13 | 1.000000 | 0.000000    | 1.000000 |
| rad50          | 1.80501e-13 | 1.000000 | 1.80501e-13 | 1.000000 |
| PhcycC3H3_B+H  | 8.87679e-14 | 1.000000 | 8.87679e-14 | 1.000000 |
| rad28          | 3.33868e-14 | 1.000000 | 3.33868e-14 | 1.000000 |
| rad2           | 3.13180e-14 | 1.000000 | 3.13180e-14 | 1.000000 |
| rad70          | 2.94046e-14 | 1.000000 | 2.94046e-14 | 1.000000 |
| rad55          | 1.29884e-14 | 1.000000 | 1.29884e-14 | 1.000000 |
| PAH1+H         | 1.18992e-14 | 1.000000 | 1.18992e-14 | 1.000000 |
| rad26          | 4.69241e-15 | 1.000000 | 4.69241e-15 | 1.000000 |
| rad7           | 3.66137e-15 | 1.000000 | 3.66137e-15 | 1.000000 |
| rad1           | 2.12205e-15 | 1.000000 | 2.12205e-15 | 1.000000 |
| rad10          | 1.87889e-15 | 1.000000 | 1.87889e-15 | 1.000000 |
| rad52          | 1.64458e-15 | 1.000000 | 1.64458e-15 | 1.000000 |
| rad11          | 9.88311e-16 | 1.000000 | 9.88311e-16 | 1.000000 |
| rad58          | 9.10695e-16 | 1.000000 | 9.10695e-16 | 1.000000 |
| rad34          | 6.51679e-16 | 1.000000 | 6.51679e-16 | 1.000000 |
| rad51          | 6.22150e-16 | 1.000000 | 6.22150e-16 | 1.000000 |
| rad3           | 2.31067e-16 | 1.000000 | 2.31067e-16 | 1.000000 |
| rad41          | 1.57155e-16 | 1.000000 | 1.57155e-16 | 1.000000 |
| rad4           | 1.18809e-16 | 1.000000 | 1.18809e-16 | 1.000000 |
| rad42          | 1.05350e-16 | 1.000000 | 1.05350e-16 | 1.000000 |
| rad65          | 1.50381e-17 | 1.000000 | 1.50381e-17 | 1.000000 |
| rad13          | 1.46209e-17 | 1.000000 | 1.46209e-17 | 1.000000 |
| rad23          | 2.62837e-18 | 1.000000 | 2.62837e-18 | 1.000000 |
| rad53          | 9.39958e-19 | 1.000000 | 9.39958e-19 | 1.000000 |
| rad9           | 2.92451e-19 | 1.000000 | 2.92451e-19 | 1.000000 |
| rad64          | 2.16774e-19 | 1.000000 | 2.16774e-19 | 1.000000 |
| rad45          | 3.98941e-20 | 1.000000 | 3.98941e-20 | 1.000000 |
| rad33          | 2.74767e-20 | 1.000000 | 2.74767e-20 | 1.000000 |
| rad61          | 2.59821e-20 | 1.000000 | 2.59821e-20 | 1.000000 |
| rad14          | 1.97188e-20 | 1.000000 | 1.97188e-20 | 1.000000 |
| rad27          | 1.85284e-20 | 1.000000 | 1.85284e-20 | 1.000000 |
| rad25          | 9.93343e-21 | 1.000000 | 9.93343e-21 | 1.000000 |
| rad36          | 2.47732e-21 | 1.000000 | 2.47732e-21 | 1.000000 |
| rad22          | 1.63662e-21 | 1.000000 | 1.63662e-21 | 1.000000 |
| rad56          | 1.44472e-21 | 1.000000 | 1.44472e-21 | 1.000000 |
| rad68syn       | 1.57741e-22 | 1.000000 | 1.57741e-22 | 1.000000 |
| rad15          | 1.41444e-22 | 1.000000 | 1.41444e-22 | 1.000000 |
| rad68anti      | 1.21889e-22 | 1.000000 | 1.21889e-22 | 1.000000 |
| rad31          | 9.34305e-25 | 1.000000 | 9.34305e-25 | 1.000000 |
| rad40syn       | 6.16464e-25 | 1.000000 | 6.16464e-25 | 1.000000 |
| rad40anti      | 4.94885e-25 | 1.000000 | 4.94885e-25 | 1.000000 |
| rad20          | 2.24965e-25 | 1.000000 | 2.24965e-25 | 1.000000 |
| rad21          | 1.64972e-25 | 1.000000 | 1.64972e-25 | 1.000000 |
| PAH8+H         | 4.65230e-26 | 1.000000 | 4.65230e-26 | 1.000000 |
| rad73          | 2.54376e-26 | 1.000000 | 2.54376e-26 | 1.000000 |
| rad19anti      | 1.98428e-26 | 1.000000 | 1.98428e-26 | 1.000000 |
| rad5           | 1.63034e-26 | 1.000000 | 1.63034e-26 | 1.000000 |
| rad18          | 1.14532e-26 | 1.000000 | 1.14532e-26 | 1.000000 |
| rad47          | 7.47724e-27 | 1.000000 | 7.47724e-27 | 1.000000 |
| rad12          | 1.54321e-27 | 1.000000 | 1.54321e-27 | 1.000000 |
| rad24          | 4.29155e-28 | 1.000000 | 4.29155e-28 | 1.000000 |
| rad71          | 6.51834e-29 | 1.000000 | 6.51834e-29 | 1.000000 |
| rad19syn       | 2.51002e-35 | 1.000000 | 2.51002e-35 | 1.000000 |
| rad8           | 1.54508e-58 | 1.000000 | 1.54508e-58 | 1.000000 |

0.100000000 Pa, 210.000000 K

=====

| Rate constant             | True (fraction)        | Effective (fraction)   |
|---------------------------|------------------------|------------------------|
| Total                     | 1.74272e-14 (1.00 )    | 1.74272e-14 (1.00 )    |
| Formation of rad19        | 1.74253e-14 (1.000 )   | 1.74253e-14 (1.000 )   |
| H-abstraction to cyc2enyl | 1.89310e-18 (0.000109) | 1.89310e-18 (0.000109) |
| H-abstraction to cyclenyl | 6.66714e-22 (3.83e-08) | 6.66714e-22 (3.83e-08) |

| species                       | PYtrue      | Cumul    | PYeffective | Cumul    |
|-------------------------------|-------------|----------|-------------|----------|
| Indene+H                      | 0.999511    | 0.999511 | 0.999511    | 0.999511 |
| PhCHCCH2+H                    | 0.000359644 | 0.999871 | 0.000359644 | 0.999871 |
| Benzene+cycloprop-2-enylidene | 0.000108629 | 0.999980 | 0.000108629 | 0.999980 |
| PhCCH+CH3                     | 6.42251e-06 | 0.999986 | 6.42251e-06 | 0.999986 |
| C2H2+PhCH2                    | 5.12151e-06 | 0.999991 | 5.12151e-06 | 0.999991 |
| PhCCCH3+H                     | 3.83270e-06 | 0.999995 | 3.83270e-06 | 0.999995 |
| Ph+MeAc                       | 3.23433e-06 | 0.999998 | 3.23433e-06 | 0.999998 |
| rad67                         | 9.48024e-07 | 0.999999 | 9.48024e-07 | 0.999999 |
| rad35                         | 4.07951e-07 | 1.000000 | 4.07951e-07 | 1.000000 |
| Ph+Allene                     | 3.62840e-07 | 1.000000 | 3.62840e-07 | 1.000000 |
| PhCH2CCH+H                    | 5.20524e-08 | 1.000000 | 5.20524e-08 | 1.000000 |

|                               |             |         |             |         |
|-------------------------------|-------------|---------|-------------|---------|
| PAH7+H                        | 4.14425e-08 | 1.00000 | 4.14425e-08 | 1.00000 |
| Benzene+cycloprop-1-enylidene | 3.82571e-08 | 1.00000 | 3.82571e-08 | 1.00000 |
| rad39                         | 1.16845e-08 | 1.00000 | 1.16845e-08 | 1.00000 |
| rad37                         | 1.14221e-08 | 1.00000 | 1.14221e-08 | 1.00000 |
| rad30                         | 7.78692e-09 | 1.00000 | 7.78692e-09 | 1.00000 |
| PAH9+H                        | 6.24195e-10 | 1.00000 | 6.24195e-10 | 1.00000 |
| rad38                         | 2.89893e-10 | 1.00000 | 2.89893e-10 | 1.00000 |
| rad60syn                      | 4.49466e-11 | 1.00000 | 4.49466e-11 | 1.00000 |
| PAH10+CH3                     | 3.69251e-11 | 1.00000 | 3.69251e-11 | 1.00000 |
| PAH3+H                        | 2.57140e-11 | 1.00000 | 2.57140e-11 | 1.00000 |
| rad6                          | 2.49248e-11 | 1.00000 | 2.49248e-11 | 1.00000 |
| PhcycC3H3_A+H                 | 2.31888e-11 | 1.00000 | 2.31888e-11 | 1.00000 |
| rad60anti                     | 2.25130e-11 | 1.00000 | 2.25130e-11 | 1.00000 |
| rad46                         | 1.86915e-11 | 1.00000 | 1.86915e-11 | 1.00000 |
| rad59                         | 5.03787e-12 | 1.00000 | 5.03787e-12 | 1.00000 |
| rad43                         | 1.35445e-12 | 1.00000 | 1.35445e-12 | 1.00000 |
| rad54                         | 1.32081e-12 | 1.00000 | 1.32081e-12 | 1.00000 |
| rad62                         | 3.01129e-13 | 1.00000 | 3.01129e-13 | 1.00000 |
| Phenyl+cycC3H4                | 2.70226e-13 | 1.00000 | 0.00000     | 1.00000 |
| rad50                         | 2.07458e-13 | 1.00000 | 2.07458e-13 | 1.00000 |
| PhcycC3H3_B+H                 | 1.51584e-13 | 1.00000 | 1.51584e-13 | 1.00000 |
| rad70                         | 3.61498e-14 | 1.00000 | 3.61498e-14 | 1.00000 |
| rad28                         | 2.41477e-14 | 1.00000 | 2.41477e-14 | 1.00000 |
| rad2                          | 2.26167e-14 | 1.00000 | 2.26167e-14 | 1.00000 |
| rad55                         | 1.59718e-14 | 1.00000 | 1.59718e-14 | 1.00000 |
| PAH1+H                        | 1.55370e-14 | 1.00000 | 1.55370e-14 | 1.00000 |
| rad26                         | 3.39722e-15 | 1.00000 | 3.39722e-15 | 1.00000 |
| rad7                          | 2.64343e-15 | 1.00000 | 2.64343e-15 | 1.00000 |
| rad52                         | 1.95905e-15 | 1.00000 | 1.95905e-15 | 1.00000 |
| rad1                          | 1.54524e-15 | 1.00000 | 1.54524e-15 | 1.00000 |
| rad10                         | 1.35499e-15 | 1.00000 | 1.35499e-15 | 1.00000 |
| rad58                         | 1.14086e-15 | 1.00000 | 1.14086e-15 | 1.00000 |
| rad34                         | 8.55329e-16 | 1.00000 | 8.55329e-16 | 1.00000 |
| rad51                         | 7.72869e-16 | 1.00000 | 7.72869e-16 | 1.00000 |
| rad11                         | 7.12703e-16 | 1.00000 | 7.12703e-16 | 1.00000 |
| rad41                         | 2.12784e-16 | 1.00000 | 2.12784e-16 | 1.00000 |
| rad3                          | 1.66619e-16 | 1.00000 | 1.66619e-16 | 1.00000 |
| rad42                         | 1.38942e-16 | 1.00000 | 1.38942e-16 | 1.00000 |
| rad4                          | 8.58661e-17 | 1.00000 | 8.58661e-17 | 1.00000 |
| rad65                         | 1.89912e-17 | 1.00000 | 1.89912e-17 | 1.00000 |
| rad13                         | 1.06317e-17 | 1.00000 | 1.06317e-17 | 1.00000 |
| rad23                         | 1.76804e-18 | 1.00000 | 1.76804e-18 | 1.00000 |
| rad53                         | 1.60740e-18 | 1.00000 | 1.60740e-18 | 1.00000 |
| rad64                         | 4.00918e-19 | 1.00000 | 4.00918e-19 | 1.00000 |
| rad9                          | 2.72037e-19 | 1.00000 | 2.72037e-19 | 1.00000 |
| rad61                         | 6.04783e-20 | 1.00000 | 6.04783e-20 | 1.00000 |
| rad45                         | 2.67171e-20 | 1.00000 | 2.67171e-20 | 1.00000 |
| rad33                         | 2.00372e-20 | 1.00000 | 2.00372e-20 | 1.00000 |
| rad14                         | 1.42717e-20 | 1.00000 | 1.42717e-20 | 1.00000 |
| rad27                         | 1.34271e-20 | 1.00000 | 1.34271e-20 | 1.00000 |
| rad25                         | 7.22685e-21 | 1.00000 | 7.22685e-21 | 1.00000 |
| rad56                         | 3.70671e-21 | 1.00000 | 3.70671e-21 | 1.00000 |
| rad36                         | 1.66445e-21 | 1.00000 | 1.66445e-21 | 1.00000 |
| rad22                         | 1.09469e-21 | 1.00000 | 1.09469e-21 | 1.00000 |
| rad68syn                      | 4.21781e-22 | 1.00000 | 4.21781e-22 | 1.00000 |
| rad68anti                     | 3.23663e-22 | 1.00000 | 3.23663e-22 | 1.00000 |
| rad15                         | 1.31334e-22 | 1.00000 | 1.31334e-22 | 1.00000 |
| rad40syn                      | 2.29692e-24 | 1.00000 | 2.29692e-24 | 1.00000 |
| rad40anti                     | 1.84357e-24 | 1.00000 | 1.84357e-24 | 1.00000 |
| rad31                         | 7.17410e-25 | 1.00000 | 7.17410e-25 | 1.00000 |
| PAH8+H                        | 2.19405e-25 | 1.00000 | 2.19405e-25 | 1.00000 |
| rad20                         | 1.73761e-25 | 1.00000 | 1.73761e-25 | 1.00000 |
| rad21                         | 1.27962e-25 | 1.00000 | 1.27962e-25 | 1.00000 |
| rad73                         | 9.24032e-26 | 1.00000 | 9.24032e-26 | 1.00000 |
| rad19anti                     | 6.00824e-26 | 1.00000 | 6.00824e-26 | 1.00000 |
| rad5                          | 1.14485e-26 | 1.00000 | 1.14485e-26 | 1.00000 |
| rad18                         | 8.35875e-27 | 1.00000 | 8.35875e-27 | 1.00000 |
| rad47                         | 7.98207e-27 | 1.00000 | 7.98207e-27 | 1.00000 |
| rad12                         | 1.45211e-27 | 1.00000 | 1.45211e-27 | 1.00000 |
| rad71                         | 3.38332e-28 | 1.00000 | 3.38332e-28 | 1.00000 |
| rad24                         | 2.91135e-28 | 1.00000 | 2.91135e-28 | 1.00000 |
| rad19syn                      | 8.46110e-35 | 1.00000 | 8.46110e-35 | 1.00000 |
| rad8                          | 2.56610e-58 | 1.00000 | 2.56610e-58 | 1.00000 |

0.100000000 Pa, 220.000000 K

| Rate constant      | True (fraction)      | Effective (fraction) |
|--------------------|----------------------|----------------------|
| Total              | 1.97009e-14 (1.00 )  | 1.97009e-14 (1.00 )  |
| Formation of rad19 | 1.96977e-14 (1.000 ) | 1.96977e-14 (1.000 ) |

H-abstraction to cyc2enyl | 3.19064e-18 (0.000162) 3.19064e-18 (0.000162)  
H-abstraction to cyc1enyl | 1.64627e-21 (8.36e-08) 1.64627e-21 (8.36e-08)

| species                       | PYtrue      | Cumul    | PYeffective | Cumul    |
|-------------------------------|-------------|----------|-------------|----------|
| Indene+H                      | 0.999441    | 0.999441 | 0.999441    | 0.999441 |
| PhCHCCH2+H                    | 0.000375302 | 0.999816 | 0.000375302 | 0.999816 |
| Benzene+cycloprop-2-enylidene | 0.000161954 | 0.999978 | 0.000161954 | 0.999978 |
| PhCCH+CH3                     | 6.71370e-06 | 0.999985 | 6.71370e-06 | 0.999985 |
| C2H2+PhCH2                    | 5.41616e-06 | 0.999990 | 5.41616e-06 | 0.999990 |
| PhCCCH3+H                     | 4.02930e-06 | 0.999994 | 4.02930e-06 | 0.999994 |
| Ph+MeAc                       | 3.43996e-06 | 0.999998 | 3.43996e-06 | 0.999998 |
| rad67                         | 1.00572e-06 | 0.999999 | 1.00572e-06 | 0.999999 |
| rad35                         | 4.31723e-07 | 0.999999 | 4.31723e-07 | 0.999999 |
| Ph+Allene                     | 3.96163e-07 | 1.000000 | 3.96163e-07 | 1.000000 |
| Benzene+cycloprop-1-enylidene | 8.35632e-08 | 1.000000 | 8.35632e-08 | 1.000000 |
| PhCH2CCH+H                    | 5.77091e-08 | 1.000000 | 5.77091e-08 | 1.000000 |
| PAH7+H                        | 4.46268e-08 | 1.000000 | 4.46268e-08 | 1.000000 |
| rad39                         | 1.25781e-08 | 1.000000 | 1.25781e-08 | 1.000000 |
| rad37                         | 1.23433e-08 | 1.000000 | 1.23433e-08 | 1.000000 |
| rad30                         | 8.26261e-09 | 1.000000 | 8.26261e-09 | 1.000000 |
| PAH9+H                        | 6.76164e-10 | 1.000000 | 6.76164e-10 | 1.000000 |
| rad38                         | 3.17125e-10 | 1.000000 | 3.17125e-10 | 1.000000 |
| rad60syn                      | 4.89518e-11 | 1.000000 | 4.89518e-11 | 1.000000 |
| PAH10+CH3                     | 4.35652e-11 | 1.000000 | 4.35652e-11 | 1.000000 |
| PhcycC3H3_A+H                 | 3.07903e-11 | 1.000000 | 3.07903e-11 | 1.000000 |
| PAH3+H                        | 2.89632e-11 | 1.000000 | 2.89632e-11 | 1.000000 |
| rad60anti                     | 2.45764e-11 | 1.000000 | 2.45764e-11 | 1.000000 |
| rad46                         | 2.05767e-11 | 1.000000 | 2.05767e-11 | 1.000000 |
| rad6                          | 1.82266e-11 | 1.000000 | 1.82266e-11 | 1.000000 |
| rad59                         | 5.64274e-12 | 1.000000 | 5.64274e-12 | 1.000000 |
| rad54                         | 1.56072e-12 | 1.000000 | 1.56072e-12 | 1.000000 |
| rad43                         | 1.56042e-12 | 1.000000 | 1.56042e-12 | 1.000000 |
| Phenyl+cycC3H4                | 3.96956e-13 | 1.000000 | 0.000000    | 1.000000 |
| rad62                         | 3.47448e-13 | 1.000000 | 3.47448e-13 | 1.000000 |
| PhcycC3H3_B+H                 | 2.54098e-13 | 1.000000 | 2.54098e-13 | 1.000000 |
| rad50                         | 2.40108e-13 | 1.000000 | 2.40108e-13 | 1.000000 |
| rad70                         | 4.47808e-14 | 1.000000 | 4.47808e-14 | 1.000000 |
| PAH1+H                        | 2.04334e-14 | 1.000000 | 2.04334e-14 | 1.000000 |
| rad55                         | 1.97857e-14 | 1.000000 | 1.97857e-14 | 1.000000 |
| rad28                         | 1.76169e-14 | 1.000000 | 1.76169e-14 | 1.000000 |
| rad2                          | 1.64767e-14 | 1.000000 | 1.64767e-14 | 1.000000 |
| rad26                         | 2.48073e-15 | 1.000000 | 2.48073e-15 | 1.000000 |
| rad52                         | 2.35330e-15 | 1.000000 | 2.35330e-15 | 1.000000 |
| rad7                          | 1.92534e-15 | 1.000000 | 1.92534e-15 | 1.000000 |
| rad58                         | 1.44131e-15 | 1.000000 | 1.44131e-15 | 1.000000 |
| rad1                          | 1.13592e-15 | 1.000000 | 1.13592e-15 | 1.000000 |
| rad34                         | 1.13067e-15 | 1.000000 | 1.13067e-15 | 1.000000 |
| rad10                         | 9.85942e-16 | 1.000000 | 9.85942e-16 | 1.000000 |
| rad51                         | 9.69326e-16 | 1.000000 | 9.69326e-16 | 1.000000 |
| rad11                         | 5.18544e-16 | 1.000000 | 5.18544e-16 | 1.000000 |
| rad41                         | 2.89313e-16 | 1.000000 | 2.89313e-16 | 1.000000 |
| rad42                         | 1.84011e-16 | 1.000000 | 1.84011e-16 | 1.000000 |
| rad3                          | 1.21236e-16 | 1.000000 | 1.21236e-16 | 1.000000 |
| rad4                          | 6.26334e-17 | 1.000000 | 6.26334e-17 | 1.000000 |
| rad65                         | 2.42115e-17 | 1.000000 | 2.42115e-17 | 1.000000 |
| rad13                         | 7.79864e-18 | 1.000000 | 7.79864e-18 | 1.000000 |
| rad53                         | 2.71218e-18 | 1.000000 | 2.71218e-18 | 1.000000 |
| rad23                         | 1.20522e-18 | 1.000000 | 1.20522e-18 | 1.000000 |
| rad64                         | 7.24637e-19 | 1.000000 | 7.24637e-19 | 1.000000 |
| rad9                          | 2.62122e-19 | 1.000000 | 2.62122e-19 | 1.000000 |
| rad61                         | 1.34091e-19 | 1.000000 | 1.34091e-19 | 1.000000 |
| rad45                         | 1.81427e-20 | 1.000000 | 1.81427e-20 | 1.000000 |
| rad33                         | 1.47406e-20 | 1.000000 | 1.47406e-20 | 1.000000 |
| rad14                         | 1.04231e-20 | 1.000000 | 1.04231e-20 | 1.000000 |
| rad27                         | 9.81862e-21 | 1.000000 | 9.81862e-21 | 1.000000 |
| rad56                         | 8.96962e-21 | 1.000000 | 8.96962e-21 | 1.000000 |
| rad25                         | 5.30396e-21 | 1.000000 | 5.30396e-21 | 1.000000 |
| rad36                         | 1.13446e-21 | 1.000000 | 1.13446e-21 | 1.000000 |
| rad68syn                      | 1.05707e-21 | 1.000000 | 1.05707e-21 | 1.000000 |
| rad68anti                     | 8.05568e-22 | 1.000000 | 8.05568e-22 | 1.000000 |
| rad22                         | 7.42325e-22 | 1.000000 | 7.42325e-22 | 1.000000 |
| rad15                         | 1.26344e-22 | 1.000000 | 1.26344e-22 | 1.000000 |
| rad40syn                      | 7.73139e-24 | 1.000000 | 7.73139e-24 | 1.000000 |
| rad40anti                     | 6.19981e-24 | 1.000000 | 6.19981e-24 | 1.000000 |
| PAH8+H                        | 9.10826e-25 | 1.000000 | 9.10826e-25 | 1.000000 |
| rad31                         | 5.59046e-25 | 1.000000 | 5.59046e-25 | 1.000000 |
| rad73                         | 3.06591e-25 | 1.000000 | 3.06591e-25 | 1.000000 |
| rad19anti                     | 1.90475e-25 | 1.000000 | 1.90475e-25 | 1.000000 |
| rad20                         | 1.35842e-25 | 1.000000 | 1.35842e-25 | 1.000000 |



|          |             |          |             |          |
|----------|-------------|----------|-------------|----------|
| rad21    | 1.00472e-25 | 1.000000 | 1.00472e-25 | 1.000000 |
| rad47    | 8.64486e-27 | 1.000000 | 8.64486e-27 | 1.000000 |
| rad5     | 8.18071e-27 | 1.000000 | 8.18071e-27 | 1.000000 |
| rad18    | 6.18524e-27 | 1.000000 | 6.18524e-27 | 1.000000 |
| rad71    | 1.53107e-27 | 1.000000 | 1.53107e-27 | 1.000000 |
| rad12    | 1.41635e-27 | 1.000000 | 1.41635e-27 | 1.000000 |
| rad24    | 2.00292e-28 | 1.000000 | 2.00292e-28 | 1.000000 |
| rad19syn | 2.99699e-34 | 1.000000 | 2.99699e-34 | 1.000000 |
| rad8     | 4.38593e-58 | 1.000000 | 4.38593e-58 | 1.000000 |

0.100000000 Pa, 230.000000 K

| Rate constant             | True (fraction)        | Effective (fraction)   |
|---------------------------|------------------------|------------------------|
| Total                     | 2.20761e-14 (1.00 )    | 2.20761e-14 (1.00 )    |
| Formation of rad19        | 2.20710e-14 (1.000 )   | 2.20710e-14 (1.000 )   |
| H-abstraction to cyc2enyl | 5.13155e-18 (0.000232) | 5.13155e-18 (0.000232) |
| H-abstraction to cyc1enyl | 3.75316e-21 (1.70e-07) | 3.75316e-21 (1.70e-07) |

| species                       | PYtrue      | Cumul    | PYeffective | Cumul    |
|-------------------------------|-------------|----------|-------------|----------|
| Indene+H                      | 0.999352    | 0.999352 | 0.999352    | 0.999352 |
| PhCHCCH2+H                    | 0.000392402 | 0.999745 | 0.000392402 | 0.999745 |
| Benzene+cycloprop-2-enylidene | 0.000232448 | 0.999977 | 0.000232448 | 0.999977 |
| PhCCH+CH3                     | 7.03074e-06 | 0.999984 | 7.03074e-06 | 0.999984 |
| C2H2+PhCH2                    | 5.74184e-06 | 0.999990 | 5.74184e-06 | 0.999990 |
| PhCCCH3+H                     | 4.24515e-06 | 0.999994 | 4.24515e-06 | 0.999994 |
| Ph+MeAc                       | 3.66843e-06 | 0.999998 | 3.66843e-06 | 0.999998 |
| rad67                         | 1.06975e-06 | 0.999999 | 1.06975e-06 | 0.999999 |
| rad35                         | 4.58045e-07 | 1.000000 | 4.58045e-07 | 1.000000 |
| Ph+Allene                     | 4.34229e-07 | 1.000000 | 4.34229e-07 | 1.000000 |
| Benzene+cycloprop-1-enylidene | 1.70010e-07 | 1.000000 | 1.70010e-07 | 1.000000 |
| PhCH2CCH+H                    | 6.42705e-08 | 1.000000 | 6.42705e-08 | 1.000000 |
| PAH7+H                        | 4.82112e-08 | 1.000000 | 4.82112e-08 | 1.000000 |
| rad39                         | 1.35826e-08 | 1.000000 | 1.35826e-08 | 1.000000 |
| rad37                         | 1.33855e-08 | 1.000000 | 1.33855e-08 | 1.000000 |
| rad30                         | 8.79172e-09 | 1.000000 | 8.79172e-09 | 1.000000 |
| PAH9+H                        | 7.35249e-10 | 1.000000 | 7.35249e-10 | 1.000000 |
| rad38                         | 3.48453e-10 | 1.000000 | 3.48453e-10 | 1.000000 |
| rad60syn                      | 5.35298e-11 | 1.000000 | 5.35298e-11 | 1.000000 |
| PAH10+CH3                     | 5.17416e-11 | 1.000000 | 5.17416e-11 | 1.000000 |
| PhcycC3H3_A+H                 | 4.10006e-11 | 1.000000 | 4.10006e-11 | 1.000000 |
| PAH3+H                        | 3.28058e-11 | 1.000000 | 3.28058e-11 | 1.000000 |
| rad60anti                     | 2.69407e-11 | 1.000000 | 2.69407e-11 | 1.000000 |
| rad46                         | 2.27562e-11 | 1.000000 | 2.27562e-11 | 1.000000 |
| rad6                          | 1.34306e-11 | 1.000000 | 1.34306e-11 | 1.000000 |
| rad59                         | 6.35372e-12 | 1.000000 | 6.35372e-12 | 1.000000 |
| rad54                         | 1.85618e-12 | 1.000000 | 1.85618e-12 | 1.000000 |
| rad43                         | 1.80766e-12 | 1.000000 | 1.80766e-12 | 1.000000 |
| Phenyl+cycC3H4                | 5.81829e-13 | 1.000000 | 0.000000    | 1.000000 |
| PhcycC3H3_B+H                 | 4.18954e-13 | 1.000000 | 4.18954e-13 | 1.000000 |
| rad62                         | 4.02943e-13 | 1.000000 | 4.02943e-13 | 1.000000 |
| rad50                         | 2.79811e-13 | 1.000000 | 2.79811e-13 | 1.000000 |
| rad70                         | 5.58636e-14 | 1.000000 | 5.58636e-14 | 1.000000 |
| PAH1+H                        | 2.70412e-14 | 1.000000 | 2.70412e-14 | 1.000000 |
| rad55                         | 2.46774e-14 | 1.000000 | 2.46774e-14 | 1.000000 |
| rad28                         | 1.29527e-14 | 1.000000 | 1.29527e-14 | 1.000000 |
| rad2                          | 1.20988e-14 | 1.000000 | 1.20988e-14 | 1.000000 |
| rad52                         | 2.84991e-15 | 1.000000 | 2.84991e-15 | 1.000000 |
| rad58                         | 1.83501e-15 | 1.000000 | 1.83501e-15 | 1.000000 |
| rad26                         | 1.82555e-15 | 1.000000 | 1.82555e-15 | 1.000000 |
| rad34                         | 1.50392e-15 | 1.000000 | 1.50392e-15 | 1.000000 |
| rad7                          | 1.41343e-15 | 1.000000 | 1.41343e-15 | 1.000000 |
| rad51                         | 1.22673e-15 | 1.000000 | 1.22673e-15 | 1.000000 |
| rad1                          | 8.42274e-16 | 1.000000 | 8.42274e-16 | 1.000000 |
| rad10                         | 7.23209e-16 | 1.000000 | 7.23209e-16 | 1.000000 |
| rad41                         | 3.94640e-16 | 1.000000 | 3.94640e-16 | 1.000000 |
| rad11                         | 3.80307e-16 | 1.000000 | 3.80307e-16 | 1.000000 |
| rad42                         | 2.44498e-16 | 1.000000 | 2.44498e-16 | 1.000000 |
| rad3                          | 8.89368e-17 | 1.000000 | 8.89368e-17 | 1.000000 |
| rad4                          | 4.60712e-17 | 1.000000 | 4.60712e-17 | 1.000000 |
| rad65                         | 3.11391e-17 | 1.000000 | 3.11391e-17 | 1.000000 |
| rad13                         | 5.76556e-18 | 1.000000 | 5.76556e-18 | 1.000000 |
| rad53                         | 4.52111e-18 | 1.000000 | 4.52111e-18 | 1.000000 |
| rad64                         | 1.28329e-18 | 1.000000 | 1.28329e-18 | 1.000000 |
| rad23                         | 8.31644e-19 | 1.000000 | 8.31644e-19 | 1.000000 |
| rad61                         | 2.85017e-19 | 1.000000 | 2.85017e-19 | 1.000000 |
| rad9                          | 2.63798e-19 | 1.000000 | 2.63798e-19 | 1.000000 |
| rad56                         | 2.06326e-20 | 1.000000 | 2.06326e-20 | 1.000000 |
| rad45                         | 1.24786e-20 | 1.000000 | 1.24786e-20 | 1.000000 |

|           |             |         |             |         |
|-----------|-------------|---------|-------------|---------|
| rad33     | 1.09301e-20 | 1.00000 | 1.09301e-20 | 1.00000 |
| rad14     | 7.67468e-21 | 1.00000 | 7.67468e-21 | 1.00000 |
| rad27     | 7.23879e-21 | 1.00000 | 7.23879e-21 | 1.00000 |
| rad25     | 3.92353e-21 | 1.00000 | 3.92353e-21 | 1.00000 |
| rad68syn  | 2.50532e-21 | 1.00000 | 2.50532e-21 | 1.00000 |
| rad68anti | 1.89636e-21 | 1.00000 | 1.89636e-21 | 1.00000 |
| rad36     | 7.83554e-22 | 1.00000 | 7.83554e-22 | 1.00000 |
| rad22     | 5.09738e-22 | 1.00000 | 5.09738e-22 | 1.00000 |
| rad15     | 1.26972e-22 | 1.00000 | 1.26972e-22 | 1.00000 |
| rad40syn  | 2.38120e-23 | 1.00000 | 2.38120e-23 | 1.00000 |
| rad40anti | 1.90672e-23 | 1.00000 | 1.90672e-23 | 1.00000 |
| PAH8+H    | 3.37683e-24 | 1.00000 | 3.37683e-24 | 1.00000 |
| rad73     | 9.39006e-25 | 1.00000 | 9.39006e-25 | 1.00000 |
| rad19anti | 6.27935e-25 | 1.00000 | 6.27935e-25 | 1.00000 |
| rad31     | 4.41992e-25 | 1.00000 | 4.41992e-25 | 1.00000 |
| rad20     | 1.07389e-25 | 1.00000 | 1.07389e-25 | 1.00000 |
| rad21     | 7.97836e-26 | 1.00000 | 7.97836e-26 | 1.00000 |
| rad47     | 9.50452e-27 | 1.00000 | 9.50452e-27 | 1.00000 |
| rad71     | 6.12932e-27 | 1.00000 | 6.12932e-27 | 1.00000 |
| rad5      | 5.94174e-27 | 1.00000 | 5.94174e-27 | 1.00000 |
| rad18     | 4.63490e-27 | 1.00000 | 4.63490e-27 | 1.00000 |
| rad12     | 1.44396e-27 | 1.00000 | 1.44396e-27 | 1.00000 |
| rad24     | 1.39591e-28 | 1.00000 | 1.39591e-28 | 1.00000 |
| rad19syn  | 1.11381e-33 | 1.00000 | 1.11381e-33 | 1.00000 |
| rad8      | 7.70077e-58 | 1.00000 | 7.70077e-58 | 1.00000 |

0.100000000 Pa, 240.000000 K

| Rate constant             | True (fraction)        | Effective (fraction)   |
|---------------------------|------------------------|------------------------|
| Total                     | 2.45462e-14 (1.00 )    | 2.45462e-14 (1.00 )    |
| Formation of rad19        | 2.45383e-14 (1.000 )   | 2.45383e-14 (1.000 )   |
| H-abstraction to cyc2enyl | 7.92234e-18 (0.000323) | 7.92234e-18 (0.000323) |
| H-abstraction to cyclenyl | 7.97958e-21 (3.25e-07) | 7.97958e-21 (3.25e-07) |

| species                       | PYtrue      | Cumul    | PYeffective | Cumul    |
|-------------------------------|-------------|----------|-------------|----------|
| Indene+H                      | 0.999242    | 0.999242 | 0.999242    | 0.999242 |
| PhCHCCH2+H                    | 0.000411077 | 0.999653 | 0.000411077 | 0.999653 |
| Benzene+cycloprop-2-enylidene | 0.000322752 | 0.999976 | 0.000322752 | 0.999976 |
| PhCCH+CH3                     | 7.37586e-06 | 0.999983 | 7.37586e-06 | 0.999983 |
| C2H2+PhCH2                    | 6.10199e-06 | 0.999989 | 6.10199e-06 | 0.999989 |
| PhCCH3+H                      | 4.48220e-06 | 0.999994 | 4.48220e-06 | 0.999994 |
| Ph+MeAc                       | 3.92235e-06 | 0.999998 | 3.92235e-06 | 0.999998 |
| rad67                         | 1.14083e-06 | 0.999999 | 1.14083e-06 | 0.999999 |
| rad35                         | 4.87202e-07 | 0.999999 | 4.87202e-07 | 0.999999 |
| Ph+Allene                     | 4.77779e-07 | 1.000000 | 4.77779e-07 | 1.000000 |
| Benzene+cycloprop-1-enylidene | 3.25084e-07 | 1.000000 | 3.25084e-07 | 1.000000 |
| PhCH2CCH+H                    | 7.18957e-08 | 1.000000 | 7.18957e-08 | 1.000000 |
| PAH7+H                        | 5.22501e-08 | 1.000000 | 5.22501e-08 | 1.000000 |
| rad39                         | 1.47131e-08 | 1.000000 | 1.47131e-08 | 1.000000 |
| rad37                         | 1.45660e-08 | 1.000000 | 1.45660e-08 | 1.000000 |
| rad30                         | 9.38067e-09 | 1.000000 | 9.38067e-09 | 1.000000 |
| PAH9+H                        | 8.02533e-10 | 1.000000 | 8.02533e-10 | 1.000000 |
| rad38                         | 3.84569e-10 | 1.000000 | 3.84569e-10 | 1.000000 |
| PAH10+CH3                     | 6.18373e-11 | 1.000000 | 6.18373e-11 | 1.000000 |
| rad60syn                      | 5.87712e-11 | 1.000000 | 5.87712e-11 | 1.000000 |
| PhcycC3H3_A+H                 | 5.47073e-11 | 1.000000 | 5.47073e-11 | 1.000000 |
| PAH3+H                        | 3.73616e-11 | 1.000000 | 3.73616e-11 | 1.000000 |
| rad60anti                     | 2.96541e-11 | 1.000000 | 2.96541e-11 | 1.000000 |
| rad46                         | 2.52815e-11 | 1.000000 | 2.52815e-11 | 1.000000 |
| rad6                          | 9.96487e-12 | 1.000000 | 9.96487e-12 | 1.000000 |
| rad59                         | 7.19138e-12 | 1.000000 | 7.19138e-12 | 1.000000 |
| rad54                         | 2.22106e-12 | 1.000000 | 2.22106e-12 | 1.000000 |
| rad43                         | 2.10503e-12 | 1.000000 | 2.10503e-12 | 1.000000 |
| Phenyl+cycC3H4                | 8.50545e-13 | 1.000000 | 0.000000    | 1.000000 |
| PhcycC3H3_B+H                 | 6.80477e-13 | 1.000000 | 6.80477e-13 | 1.000000 |
| rad62                         | 4.69539e-13 | 1.000000 | 4.69539e-13 | 1.000000 |
| rad50                         | 3.28265e-13 | 1.000000 | 3.28265e-13 | 1.000000 |
| rad70                         | 7.01344e-14 | 1.000000 | 7.01344e-14 | 1.000000 |
| PAH1+H                        | 3.59745e-14 | 1.000000 | 3.59745e-14 | 1.000000 |
| rad55                         | 3.09680e-14 | 1.000000 | 3.09680e-14 | 1.000000 |
| rad28                         | 9.59039e-15 | 1.000000 | 9.59039e-15 | 1.000000 |
| rad2                          | 8.94801e-15 | 1.000000 | 8.94801e-15 | 1.000000 |
| rad52                         | 3.47810e-15 | 1.000000 | 3.47810e-15 | 1.000000 |
| rad58                         | 2.35256e-15 | 1.000000 | 2.35256e-15 | 1.000000 |
| rad34                         | 2.01084e-15 | 1.000000 | 2.01084e-15 | 1.000000 |
| rad51                         | 1.56552e-15 | 1.000000 | 1.56552e-15 | 1.000000 |
| rad26                         | 1.35284e-15 | 1.000000 | 1.35284e-15 | 1.000000 |
| rad7                          | 1.04506e-15 | 1.000000 | 1.04506e-15 | 1.000000 |

|           |             |         |             |         |
|-----------|-------------|---------|-------------|---------|
| rad1      | 6.29532e-16 | 1.00000 | 6.29532e-16 | 1.00000 |
| rad41     | 5.39555e-16 | 1.00000 | 5.39555e-16 | 1.00000 |
| rad10     | 5.34381e-16 | 1.00000 | 5.34381e-16 | 1.00000 |
| rad42     | 3.25651e-16 | 1.00000 | 3.25651e-16 | 1.00000 |
| rad11     | 2.80945e-16 | 1.00000 | 2.80945e-16 | 1.00000 |
| rad3      | 6.57281e-17 | 1.00000 | 6.57281e-17 | 1.00000 |
| rad65     | 4.03700e-17 | 1.00000 | 4.03700e-17 | 1.00000 |
| rad4      | 3.41488e-17 | 1.00000 | 3.41488e-17 | 1.00000 |
| rad53     | 7.45211e-18 | 1.00000 | 7.45211e-18 | 1.00000 |
| rad13     | 4.29293e-18 | 1.00000 | 4.29293e-18 | 1.00000 |
| rad64     | 2.23113e-18 | 1.00000 | 2.23113e-18 | 1.00000 |
| rad61     | 5.83707e-19 | 1.00000 | 5.83707e-19 | 1.00000 |
| rad23     | 5.80378e-19 | 1.00000 | 5.80378e-19 | 1.00000 |
| rad9      | 2.81835e-19 | 1.00000 | 2.81835e-19 | 1.00000 |
| rad56     | 4.53913e-20 | 1.00000 | 4.53913e-20 | 1.00000 |
| rad45     | 8.68545e-21 | 1.00000 | 8.68545e-21 | 1.00000 |
| rad33     | 8.16305e-21 | 1.00000 | 8.16305e-21 | 1.00000 |
| rad14     | 5.69299e-21 | 1.00000 | 5.69299e-21 | 1.00000 |
| rad68syn  | 5.65417e-21 | 1.00000 | 5.65417e-21 | 1.00000 |
| rad27     | 5.37664e-21 | 1.00000 | 5.37664e-21 | 1.00000 |
| rad68anti | 4.25215e-21 | 1.00000 | 4.25215e-21 | 1.00000 |
| rad25     | 2.92321e-21 | 1.00000 | 2.92321e-21 | 1.00000 |
| rad36     | 5.47948e-22 | 1.00000 | 5.47948e-22 | 1.00000 |
| rad22     | 3.54113e-22 | 1.00000 | 3.54113e-22 | 1.00000 |
| rad15     | 1.35488e-22 | 1.00000 | 1.35488e-22 | 1.00000 |
| rad40syn  | 6.77799e-23 | 1.00000 | 6.77799e-23 | 1.00000 |
| rad40anti | 5.41755e-23 | 1.00000 | 5.41755e-23 | 1.00000 |
| PAH8+H    | 1.13113e-23 | 1.00000 | 1.13113e-23 | 1.00000 |
| rad73     | 2.67582e-24 | 1.00000 | 2.67582e-24 | 1.00000 |
| rad19anti | 2.14167e-24 | 1.00000 | 2.14167e-24 | 1.00000 |
| rad31     | 3.54520e-25 | 1.00000 | 3.54520e-25 | 1.00000 |
| rad20     | 8.57836e-26 | 1.00000 | 8.57836e-26 | 1.00000 |
| rad21     | 6.40278e-26 | 1.00000 | 6.40278e-26 | 1.00000 |
| rad71     | 2.19684e-26 | 1.00000 | 2.19684e-26 | 1.00000 |
| rad47     | 1.06151e-26 | 1.00000 | 1.06151e-26 | 1.00000 |
| rad5      | 4.38234e-27 | 1.00000 | 4.38234e-27 | 1.00000 |
| rad18     | 3.51355e-27 | 1.00000 | 3.51355e-27 | 1.00000 |
| rad12     | 1.56403e-27 | 1.00000 | 1.56403e-27 | 1.00000 |
| rad24     | 9.84678e-29 | 1.00000 | 9.84678e-29 | 1.00000 |
| rad19syn  | 4.33470e-33 | 1.00000 | 4.33470e-33 | 1.00000 |
| rad8      | 1.38735e-57 | 1.00000 | 1.38735e-57 | 1.00000 |

0.100000000 Pa, 250.000000 K

=====

| Rate constant             | True (fraction)        | Effective (fraction)   |
|---------------------------|------------------------|------------------------|
| Total                     | 2.71048e-14 (1.00 )    | 2.71048e-14 (1.00 )    |
| Formation of rad19        | 2.70930e-14 (1.000 )   | 2.70930e-14 (1.000 )   |
| H-abstraction to cyc2enyl | 1.17991e-17 (0.000435) | 1.17991e-17 (0.000435) |
| H-abstraction to cyclenyl | 1.59554e-20 (5.89e-07) | 1.59554e-20 (5.89e-07) |

| species                       | PYtrue      | Cumul    | PYeffective | Cumul    |
|-------------------------------|-------------|----------|-------------|----------|
| Indene+H                      | 0.999107    | 0.999107 | 0.999107    | 0.999107 |
| Benzene+cycloprop-2-enylidene | 0.000435312 | 0.999543 | 0.000435312 | 0.999543 |
| PhCHCCH2+H                    | 0.000431472 | 0.999974 | 0.000431472 | 0.999974 |
| PhCCH+CH3                     | 7.75136e-06 | 0.999982 | 7.75136e-06 | 0.999982 |
| C2H2+PhCH2                    | 6.50030e-06 | 0.999988 | 6.50030e-06 | 0.999988 |
| PhCCCH3+H                     | 4.74250e-06 | 0.999993 | 4.74250e-06 | 0.999993 |
| Ph+MeAc                       | 4.20465e-06 | 0.999997 | 4.20465e-06 | 0.999997 |
| rad67                         | 1.21979e-06 | 0.999999 | 1.21979e-06 | 0.999999 |
| Benzene+cycloprop-1-enylidene | 5.88656e-07 | 0.999999 | 5.88656e-07 | 0.999999 |
| Ph+Allene                     | 5.27661e-07 | 1.000000 | 5.27661e-07 | 1.000000 |
| rad35                         | 5.19507e-07 | 1.000000 | 5.19507e-07 | 1.000000 |
| PhCH2CCH+H                    | 8.07704e-08 | 1.000000 | 8.07704e-08 | 1.000000 |
| PAH7+H                        | 5.68044e-08 | 1.000000 | 5.68044e-08 | 1.000000 |
| rad39                         | 1.59861e-08 | 1.000000 | 1.59861e-08 | 1.000000 |
| rad37                         | 1.59043e-08 | 1.000000 | 1.59043e-08 | 1.000000 |
| rad30                         | 1.00365e-08 | 1.000000 | 1.00365e-08 | 1.000000 |
| PAH9+H                        | 8.79254e-10 | 1.000000 | 8.79254e-10 | 1.000000 |
| rad38                         | 4.26278e-10 | 1.000000 | 4.26278e-10 | 1.000000 |
| PAH10+CH3                     | 7.43316e-11 | 1.000000 | 7.43316e-11 | 1.000000 |
| PhcycC3H3_A+H                 | 7.30860e-11 | 1.000000 | 7.30860e-11 | 1.000000 |
| rad60syn                      | 6.47798e-11 | 1.000000 | 6.47798e-11 | 1.000000 |
| PAH3+H                        | 4.27750e-11 | 1.000000 | 4.27750e-11 | 1.000000 |
| rad60anti                     | 3.27724e-11 | 1.000000 | 3.27724e-11 | 1.000000 |
| rad46                         | 2.82129e-11 | 1.000000 | 2.82129e-11 | 1.000000 |
| rad59                         | 8.18026e-12 | 1.000000 | 8.18026e-12 | 1.000000 |
| rad6                          | 7.44000e-12 | 1.000000 | 7.44000e-12 | 1.000000 |
| rad54                         | 2.67271e-12 | 1.000000 | 2.67271e-12 | 1.000000 |

|                |             |         |             |         |
|----------------|-------------|---------|-------------|---------|
| rad43          | 2.46324e-12 | 1.00000 | 2.46324e-12 | 1.00000 |
| Phenyl+cycC3H4 | 1.23952e-12 | 1.00000 | 0.00000     | 1.00000 |
| PhcycC3H3_B+H  | 1.09004e-12 | 1.00000 | 1.09004e-12 | 1.00000 |
| rad62          | 5.49546e-13 | 1.00000 | 5.49546e-13 | 1.00000 |
| rad50          | 3.87587e-13 | 1.00000 | 3.87587e-13 | 1.00000 |
| rad70          | 8.85493e-14 | 1.00000 | 8.85493e-14 | 1.00000 |
| PAH1+H         | 4.80638e-14 | 1.00000 | 4.80638e-14 | 1.00000 |
| rad55          | 3.90737e-14 | 1.00000 | 3.90737e-14 | 1.00000 |
| rad28          | 7.14641e-15 | 1.00000 | 7.14641e-15 | 1.00000 |
| rad2           | 6.66124e-15 | 1.00000 | 6.66124e-15 | 1.00000 |
| rad52          | 4.27561e-15 | 1.00000 | 4.27561e-15 | 1.00000 |
| rad58          | 3.03455e-15 | 1.00000 | 3.03455e-15 | 1.00000 |
| rad34          | 2.70001e-15 | 1.00000 | 2.70001e-15 | 1.00000 |
| rad51          | 2.01311e-15 | 1.00000 | 2.01311e-15 | 1.00000 |
| rad26          | 1.00900e-15 | 1.00000 | 1.00900e-15 | 1.00000 |
| rad7           | 7.77732e-16 | 1.00000 | 7.77732e-16 | 1.00000 |
| rad41          | 7.38734e-16 | 1.00000 | 7.38734e-16 | 1.00000 |
| rad1           | 4.74016e-16 | 1.00000 | 4.74016e-16 | 1.00000 |
| rad42          | 4.34422e-16 | 1.00000 | 4.34422e-16 | 1.00000 |
| rad10          | 3.97509e-16 | 1.00000 | 3.97509e-16 | 1.00000 |
| rad11          | 2.08916e-16 | 1.00000 | 2.08916e-16 | 1.00000 |
| rad65          | 5.27113e-17 | 1.00000 | 5.27113e-17 | 1.00000 |
| rad3           | 4.89075e-17 | 1.00000 | 4.89075e-17 | 1.00000 |
| rad4           | 2.54908e-17 | 1.00000 | 2.54908e-17 | 1.00000 |
| rad53          | 1.21524e-17 | 1.00000 | 1.21524e-17 | 1.00000 |
| rad64          | 3.81364e-18 | 1.00000 | 3.81364e-18 | 1.00000 |
| rad13          | 3.21728e-18 | 1.00000 | 3.21728e-18 | 1.00000 |
| rad61          | 1.15622e-18 | 1.00000 | 1.15622e-18 | 1.00000 |
| rad23          | 4.09338e-19 | 1.00000 | 4.09338e-19 | 1.00000 |
| rad9           | 3.28483e-19 | 1.00000 | 3.28483e-19 | 1.00000 |
| rad56          | 9.59450e-20 | 1.00000 | 9.59450e-20 | 1.00000 |
| rad68syn       | 1.22154e-20 | 1.00000 | 1.22154e-20 | 1.00000 |
| rad68anti      | 9.13042e-21 | 1.00000 | 9.13042e-21 | 1.00000 |
| rad33          | 6.13678e-21 | 1.00000 | 6.13678e-21 | 1.00000 |
| rad45          | 6.11333e-21 | 1.00000 | 6.11333e-21 | 1.00000 |
| rad14          | 4.25175e-21 | 1.00000 | 4.25175e-21 | 1.00000 |
| rad27          | 4.02090e-21 | 1.00000 | 4.02090e-21 | 1.00000 |
| rad25          | 2.19220e-21 | 1.00000 | 2.19220e-21 | 1.00000 |
| rad36          | 3.87711e-22 | 1.00000 | 3.87711e-22 | 1.00000 |
| rad22          | 2.48684e-22 | 1.00000 | 2.48684e-22 | 1.00000 |
| rad40syn       | 1.79705e-22 | 1.00000 | 1.79705e-22 | 1.00000 |
| rad15          | 1.57746e-22 | 1.00000 | 1.57746e-22 | 1.00000 |
| rad40anti      | 1.43346e-22 | 1.00000 | 1.43346e-22 | 1.00000 |
| PAH8+H         | 3.45615e-23 | 1.00000 | 3.45615e-23 | 1.00000 |
| rad19anti      | 7.52018e-24 | 1.00000 | 7.52018e-24 | 1.00000 |
| rad73          | 7.13680e-24 | 1.00000 | 7.13680e-24 | 1.00000 |
| rad31          | 2.88526e-25 | 1.00000 | 2.88526e-25 | 1.00000 |
| rad71          | 7.12124e-26 | 1.00000 | 7.12124e-26 | 1.00000 |
| rad20          | 6.91980e-26 | 1.00000 | 6.91980e-26 | 1.00000 |
| rad21          | 5.18975e-26 | 1.00000 | 5.18975e-26 | 1.00000 |
| rad47          | 1.20514e-26 | 1.00000 | 1.20514e-26 | 1.00000 |
| rad5           | 3.27977e-27 | 1.00000 | 3.27977e-27 | 1.00000 |
| rad18          | 2.69216e-27 | 1.00000 | 2.69216e-27 | 1.00000 |
| rad12          | 1.84969e-27 | 1.00000 | 1.84969e-27 | 1.00000 |
| rad24          | 7.02571e-29 | 1.00000 | 7.02571e-29 | 1.00000 |
| rad19syn       | 1.76219e-32 | 1.00000 | 1.76219e-32 | 1.00000 |
| rad8           | 2.56289e-57 | 1.00000 | 2.56289e-57 | 1.00000 |

0.100000000 Pa, 260.000000 K

=====

| Rate constant             | True (fraction)        | Effective (fraction)   |
|---------------------------|------------------------|------------------------|
| Total                     | 2.97464e-14 (1.00 )    | 2.97464e-14 (1.00 )    |
| Formation of rad19        | 2.97293e-14 (0.999 )   | 2.97293e-14 (0.999 )   |
| H-abstraction to cyc2enyl | 1.70236e-17 (0.000572) | 1.70236e-17 (0.000572) |
| H-abstraction to cyclenyl | 3.02186e-20 (1.02e-06) | 3.02186e-20 (1.02e-06) |

| species                       | PYtrue      | Cumul    | PYeffective | Cumul    |
|-------------------------------|-------------|----------|-------------|----------|
| Indene+H                      | 0.998946    | 0.998946 | 0.998946    | 0.998946 |
| Benzene+cycloprop-2-enylidene | 0.000572291 | 0.999518 | 0.000572291 | 0.999518 |
| PhCHCCH2+H                    | 0.000453740 | 0.999972 | 0.000453740 | 0.999972 |
| PhCCH+CH3                     | 8.15972e-06 | 0.999980 | 8.15972e-06 | 0.999980 |
| C2H2+PhCH2                    | 6.94079e-06 | 0.999987 | 6.94079e-06 | 0.999987 |
| PhCCCH3+H                     | 5.02825e-06 | 0.999992 | 5.02825e-06 | 0.999992 |
| Ph+MeAc                       | 4.51848e-06 | 0.999997 | 4.51848e-06 | 0.999997 |
| rad67                         | 1.30748e-06 | 0.999998 | 1.30748e-06 | 0.999998 |
| Benzene+cycloprop-1-enylidene | 1.01588e-06 | 0.999999 | 1.01588e-06 | 0.999999 |
| Ph+Allene                     | 5.84848e-07 | 1.000000 | 5.84848e-07 | 1.000000 |
| rad35                         | 5.55302e-07 | 1.000000 | 5.55302e-07 | 1.000000 |

|                |             |         |             |         |
|----------------|-------------|---------|-------------|---------|
| PhCH2CCH+H     | 9.11123e-08 | 1.00000 | 9.11123e-08 | 1.00000 |
| PAH7+H         | 6.19427e-08 | 1.00000 | 6.19427e-08 | 1.00000 |
| rad37          | 1.74222e-08 | 1.00000 | 1.74222e-08 | 1.00000 |
| rad39          | 1.74201e-08 | 1.00000 | 1.74201e-08 | 1.00000 |
| rad30          | 1.07672e-08 | 1.00000 | 1.07672e-08 | 1.00000 |
| PAH9+H         | 9.66836e-10 | 1.00000 | 9.66836e-10 | 1.00000 |
| rad38          | 4.74523e-10 | 1.00000 | 4.74523e-10 | 1.00000 |
| PhcycC3H3_A+H  | 9.76855e-11 | 1.00000 | 9.76855e-11 | 1.00000 |
| PAH10+CH3      | 8.98218e-11 | 1.00000 | 8.98218e-11 | 1.00000 |
| rad60syn       | 7.16754e-11 | 1.00000 | 7.16754e-11 | 1.00000 |
| PAH3+H         | 4.92198e-11 | 1.00000 | 4.92198e-11 | 1.00000 |
| rad60anti      | 3.63603e-11 | 1.00000 | 3.63603e-11 | 1.00000 |
| rad46          | 3.16212e-11 | 1.00000 | 3.16212e-11 | 1.00000 |
| rad59          | 9.34967e-12 | 1.00000 | 9.34967e-12 | 1.00000 |
| rad6           | 5.58698e-12 | 1.00000 | 5.58698e-12 | 1.00000 |
| rad54          | 3.23277e-12 | 1.00000 | 3.23277e-12 | 1.00000 |
| rad43          | 2.89526e-12 | 1.00000 | 2.89526e-12 | 1.00000 |
| Phenyl+cycC3H4 | 1.79997e-12 | 1.00000 | 0.00000     | 1.00000 |
| PhcycC3H3_B+H  | 1.72356e-12 | 1.00000 | 1.72356e-12 | 1.00000 |
| rad62          | 6.45736e-13 | 1.00000 | 6.45736e-13 | 1.00000 |
| rad50          | 4.60416e-13 | 1.00000 | 4.60416e-13 | 1.00000 |
| rad70          | 1.12346e-13 | 1.00000 | 1.12346e-13 | 1.00000 |
| PAH1+H         | 6.44269e-14 | 1.00000 | 6.44269e-14 | 1.00000 |
| rad55          | 4.95315e-14 | 1.00000 | 4.95315e-14 | 1.00000 |
| rad28          | 5.35660e-15 | 1.00000 | 5.35660e-15 | 1.00000 |
| rad52          | 5.29119e-15 | 1.00000 | 5.29119e-15 | 1.00000 |
| rad2           | 4.98901e-15 | 1.00000 | 4.98901e-15 | 1.00000 |
| rad58          | 3.93473e-15 | 1.00000 | 3.93473e-15 | 1.00000 |
| rad34          | 3.63711e-15 | 1.00000 | 3.63711e-15 | 1.00000 |
| rad51          | 2.60620e-15 | 1.00000 | 2.60620e-15 | 1.00000 |
| rad41          | 1.01203e-15 | 1.00000 | 1.01203e-15 | 1.00000 |
| rad26          | 7.57046e-16 | 1.00000 | 7.57046e-16 | 1.00000 |
| rad7           | 5.82256e-16 | 1.00000 | 5.82256e-16 | 1.00000 |
| rad42          | 5.79969e-16 | 1.00000 | 5.79969e-16 | 1.00000 |
| rad1           | 3.59407e-16 | 1.00000 | 3.59407e-16 | 1.00000 |
| rad10          | 2.97532e-16 | 1.00000 | 2.97532e-16 | 1.00000 |
| rad11          | 1.56297e-16 | 1.00000 | 1.56297e-16 | 1.00000 |
| rad65          | 6.92530e-17 | 1.00000 | 6.92530e-17 | 1.00000 |
| rad3           | 3.66218e-17 | 1.00000 | 3.66218e-17 | 1.00000 |
| rad53          | 1.96111e-17 | 1.00000 | 1.96111e-17 | 1.00000 |
| rad4           | 1.91535e-17 | 1.00000 | 1.91535e-17 | 1.00000 |
| rad64          | 6.41494e-18 | 1.00000 | 6.41494e-18 | 1.00000 |
| rad13          | 2.42563e-18 | 1.00000 | 2.42563e-18 | 1.00000 |
| rad61          | 2.22140e-18 | 1.00000 | 2.22140e-18 | 1.00000 |
| rad9           | 4.32879e-19 | 1.00000 | 4.32879e-19 | 1.00000 |
| rad23          | 2.91623e-19 | 1.00000 | 2.91623e-19 | 1.00000 |
| rad56          | 1.95500e-19 | 1.00000 | 1.95500e-19 | 1.00000 |
| rad68syn       | 2.53608e-20 | 1.00000 | 2.53608e-20 | 1.00000 |
| rad68anti      | 1.88488e-20 | 1.00000 | 1.88488e-20 | 1.00000 |
| rad33          | 4.64168e-21 | 1.00000 | 4.64168e-21 | 1.00000 |
| rad45          | 4.34913e-21 | 1.00000 | 4.34913e-21 | 1.00000 |
| rad14          | 3.19541e-21 | 1.00000 | 3.19541e-21 | 1.00000 |
| rad27          | 3.02614e-21 | 1.00000 | 3.02614e-21 | 1.00000 |
| rad25          | 1.65395e-21 | 1.00000 | 1.65395e-21 | 1.00000 |
| rad40syn       | 4.46505e-22 | 1.00000 | 4.46505e-22 | 1.00000 |
| rad40anti      | 3.55428e-22 | 1.00000 | 3.55428e-22 | 1.00000 |
| rad36          | 2.77439e-22 | 1.00000 | 2.77439e-22 | 1.00000 |
| rad15          | 2.07693e-22 | 1.00000 | 2.07693e-22 | 1.00000 |
| rad22          | 1.76447e-22 | 1.00000 | 1.76447e-22 | 1.00000 |
| PAH8+H         | 9.70996e-23 | 1.00000 | 9.70996e-23 | 1.00000 |
| rad19anti      | 2.70468e-23 | 1.00000 | 2.70468e-23 | 1.00000 |
| rad73          | 1.78966e-23 | 1.00000 | 1.78966e-23 | 1.00000 |
| rad31          | 2.38345e-25 | 1.00000 | 2.38345e-25 | 1.00000 |
| rad71          | 2.10620e-25 | 1.00000 | 2.10620e-25 | 1.00000 |
| rad20          | 5.63400e-26 | 1.00000 | 5.63400e-26 | 1.00000 |
| rad21          | 4.24660e-26 | 1.00000 | 4.24660e-26 | 1.00000 |
| rad47          | 1.39189e-26 | 1.00000 | 1.39189e-26 | 1.00000 |
| rad5           | 2.48926e-27 | 1.00000 | 2.48926e-27 | 1.00000 |
| rad12          | 2.47565e-27 | 1.00000 | 2.47565e-27 | 1.00000 |
| rad18          | 2.08349e-27 | 1.00000 | 2.08349e-27 | 1.00000 |
| rad24          | 5.06797e-29 | 1.00000 | 5.06797e-29 | 1.00000 |
| rad19syn       | 7.46104e-32 | 1.00000 | 7.46104e-32 | 1.00000 |
| rad8           | 4.85327e-57 | 1.00000 | 4.85327e-57 | 1.00000 |

0.100000000 Pa, 270.000000 K

| Rate constant      | True (fraction)      | Effective (fraction) |
|--------------------|----------------------|----------------------|
| Total              | 3.24655e-14 (1.00 )  | 3.24655e-14 (1.00 )  |
| Formation of rad19 | 3.24415e-14 (0.999 ) | 3.24415e-14 (0.999 ) |

H-abstraction to cyc2enyl | 2.38790e-17 (0.000736) 2.38790e-17 (0.000736)  
H-abstraction to cyc1enyl | 5.45397e-20 (1.68e-06) 5.45397e-20 (1.68e-06)

| species                       | PYtrue      | Cumul    | PYeffective | Cumul    |
|-------------------------------|-------------|----------|-------------|----------|
| Indene+H                      | 0.998755    | 0.998755 | 0.998755    | 0.998755 |
| Benzene+cycloprop-2-enylidene | 0.000735519 | 0.999491 | 0.000735519 | 0.999491 |
| PhCHCCH2+H                    | 0.000478041 | 0.999969 | 0.000478041 | 0.999969 |
| PhCCH+CH3                     | 8.60346e-06 | 0.999977 | 8.60346e-06 | 0.999977 |
| C2H2+PhCH2                    | 7.42782e-06 | 0.999985 | 7.42782e-06 | 0.999985 |
| PhCCCH3+H                     | 5.34182e-06 | 0.999990 | 5.34182e-06 | 0.999990 |
| Ph+MeAc                       | 4.86733e-06 | 0.999995 | 4.86733e-06 | 0.999995 |
| Benzene+cycloprop-1-enylidene | 1.67993e-06 | 0.999997 | 1.67993e-06 | 0.999997 |
| rad67                         | 1.40488e-06 | 0.999998 | 1.40488e-06 | 0.999998 |
| Ph+Allene                     | 6.50451e-07 | 0.999999 | 6.50451e-07 | 0.999999 |
| rad35                         | 5.94963e-07 | 0.999999 | 5.94963e-07 | 0.999999 |
| PhCH2CCH+H                    | 1.03175e-07 | 0.999999 | 1.03175e-07 | 0.999999 |
| PAH7+H                        | 6.77411e-08 | 0.999999 | 6.77411e-08 | 0.999999 |
| rad37                         | 1.91448e-08 | 0.999999 | 1.91448e-08 | 0.999999 |
| rad39                         | 1.90358e-08 | 1.000000 | 1.90358e-08 | 1.000000 |
| rad30                         | 1.15813e-08 | 1.000000 | 1.15813e-08 | 1.000000 |
| PAH9+H                        | 1.06691e-09 | 1.000000 | 1.06691e-09 | 1.000000 |
| rad38                         | 5.30398e-10 | 1.000000 | 5.30398e-10 | 1.000000 |
| PhcycC3H3_A+H                 | 1.30533e-10 | 1.000000 | 1.30533e-10 | 1.000000 |
| PAH10+CH3                     | 1.09052e-10 | 1.000000 | 1.09052e-10 | 1.000000 |
| rad60syn                      | 7.95960e-11 | 1.000000 | 7.95960e-11 | 1.000000 |
| PAH3+H                        | 5.69043e-11 | 1.000000 | 5.69043e-11 | 1.000000 |
| rad60anti                     | 4.04922e-11 | 1.000000 | 4.04922e-11 | 1.000000 |
| rad46                         | 3.55892e-11 | 1.000000 | 3.55892e-11 | 1.000000 |
| rad59                         | 1.07345e-11 | 1.000000 | 1.07345e-11 | 1.000000 |
| rad6                          | 4.21803e-12 | 1.000000 | 4.21803e-12 | 1.000000 |
| rad54                         | 3.92809e-12 | 1.000000 | 3.92809e-12 | 1.000000 |
| rad43                         | 3.41671e-12 | 1.000000 | 3.41671e-12 | 1.000000 |
| PhcycC3H3_B+H                 | 2.69149e-12 | 1.000000 | 2.69149e-12 | 1.000000 |
| Phenyl+cycC3H4                | 2.60320e-12 | 1.000000 | 0.000000    | 1.000000 |
| rad62                         | 7.61421e-13 | 1.000000 | 7.61421e-13 | 1.000000 |
| rad50                         | 5.50036e-13 | 1.000000 | 5.50036e-13 | 1.000000 |
| rad70                         | 1.43120e-13 | 1.000000 | 1.43120e-13 | 1.000000 |
| PAH1+H                        | 8.65597e-14 | 1.000000 | 8.65597e-14 | 1.000000 |
| rad55                         | 6.30326e-14 | 1.000000 | 6.30326e-14 | 1.000000 |
| rad52                         | 6.58768e-15 | 1.000000 | 6.58768e-15 | 1.000000 |
| rad58                         | 5.12401e-15 | 1.000000 | 5.12401e-15 | 1.000000 |
| rad34                         | 4.91046e-15 | 1.000000 | 4.91046e-15 | 1.000000 |
| rad28                         | 4.03700e-15 | 1.000000 | 4.03700e-15 | 1.000000 |
| rad2                          | 3.75790e-15 | 1.000000 | 3.75790e-15 | 1.000000 |
| rad51                         | 3.39381e-15 | 1.000000 | 3.39381e-15 | 1.000000 |
| rad41                         | 1.38609e-15 | 1.000000 | 1.38609e-15 | 1.000000 |
| rad42                         | 7.74288e-16 | 1.000000 | 7.74288e-16 | 1.000000 |
| rad26                         | 5.71209e-16 | 1.000000 | 5.71209e-16 | 1.000000 |
| rad7                          | 4.38341e-16 | 1.000000 | 4.38341e-16 | 1.000000 |
| rad1                          | 2.74319e-16 | 1.000000 | 2.74319e-16 | 1.000000 |
| rad10                         | 2.24002e-16 | 1.000000 | 2.24002e-16 | 1.000000 |
| rad11                         | 1.17592e-16 | 1.000000 | 1.17592e-16 | 1.000000 |
| rad65                         | 9.14600e-17 | 1.000000 | 9.14600e-17 | 1.000000 |
| rad53                         | 3.13168e-17 | 1.000000 | 3.13168e-17 | 1.000000 |
| rad3                          | 2.75856e-17 | 1.000000 | 2.75856e-17 | 1.000000 |
| rad4                          | 1.44815e-17 | 1.000000 | 1.44815e-17 | 1.000000 |
| rad64                         | 1.06249e-17 | 1.000000 | 1.06249e-17 | 1.000000 |
| rad61                         | 4.14758e-18 | 1.000000 | 4.14758e-18 | 1.000000 |
| rad13                         | 1.83903e-18 | 1.000000 | 1.83903e-18 | 1.000000 |
| rad9                          | 6.64190e-19 | 1.000000 | 6.64190e-19 | 1.000000 |
| rad56                         | 3.84899e-19 | 1.000000 | 3.84899e-19 | 1.000000 |
| rad23                         | 2.09788e-19 | 1.000000 | 2.09788e-19 | 1.000000 |
| rad68syn                      | 5.07365e-20 | 1.000000 | 5.07365e-20 | 1.000000 |
| rad68anti                     | 3.75140e-20 | 1.000000 | 3.75140e-20 | 1.000000 |
| rad33                         | 3.53093e-21 | 1.000000 | 3.53093e-21 | 1.000000 |
| rad45                         | 3.12628e-21 | 1.000000 | 3.12628e-21 | 1.000000 |
| rad14                         | 2.41573e-21 | 1.000000 | 2.41573e-21 | 1.000000 |
| rad27                         | 2.29116e-21 | 1.000000 | 2.29116e-21 | 1.000000 |
| rad25                         | 1.25490e-21 | 1.000000 | 1.25490e-21 | 1.000000 |
| rad40syn                      | 1.04478e-21 | 1.000000 | 1.04478e-21 | 1.000000 |
| rad40anti                     | 8.29974e-22 | 1.000000 | 8.29974e-22 | 1.000000 |
| rad15                         | 3.18438e-22 | 1.000000 | 3.18438e-22 | 1.000000 |
| PAH8+H                        | 2.52572e-22 | 1.000000 | 2.52572e-22 | 1.000000 |
| rad36                         | 2.00721e-22 | 1.000000 | 2.00721e-22 | 1.000000 |
| rad22                         | 1.26436e-22 | 1.000000 | 1.26436e-22 | 1.000000 |
| rad19anti                     | 9.90884e-23 | 1.000000 | 9.90884e-23 | 1.000000 |
| rad73                         | 4.23462e-23 | 1.000000 | 4.23462e-23 | 1.000000 |
| rad71                         | 5.72794e-25 | 1.000000 | 5.72794e-25 | 1.000000 |
| rad31                         | 1.99992e-25 | 1.000000 | 1.99992e-25 | 1.000000 |

|          |             |          |             |          |
|----------|-------------|----------|-------------|----------|
| rad20    | 4.62821e-26 | 1.000000 | 4.62821e-26 | 1.000000 |
| rad21    | 3.50675e-26 | 1.000000 | 3.50675e-26 | 1.000000 |
| rad47    | 1.63660e-26 | 1.000000 | 1.63660e-26 | 1.000000 |
| rad12    | 3.86171e-27 | 1.000000 | 3.86171e-27 | 1.000000 |
| rad5     | 1.91519e-27 | 1.000000 | 1.91519e-27 | 1.000000 |
| rad18    | 1.62769e-27 | 1.000000 | 1.62769e-27 | 1.000000 |
| rad24    | 3.69489e-29 | 1.000000 | 3.69489e-29 | 1.000000 |
| rad19syn | 3.27847e-31 | 1.000000 | 3.27847e-31 | 1.000000 |
| rad8     | 9.42101e-57 | 1.000000 | 9.42101e-57 | 1.000000 |

0.100000000 Pa, 280.000000 K

| Rate constant             | True (fraction)        | Effective (fraction)   |
|---------------------------|------------------------|------------------------|
| Total                     | 3.52572e-14 (1.00 )    | 3.52572e-14 (1.00 )    |
| Formation of rad19        | 3.52244e-14 (0.999 )   | 3.52244e-14 (0.999 )   |
| H-abstraction to cyc2enyl | 3.26639e-17 (0.000926) | 3.26639e-17 (0.000926) |
| H-abstraction to cyclenyl | 9.42926e-20 (2.67e-06) | 9.42926e-20 (2.67e-06) |

| species                       | PYtrue      | Cumul    | PYeffective | Cumul    |
|-------------------------------|-------------|----------|-------------|----------|
| Indene+H                      | 0.998535    | 0.998535 | 0.998535    | 0.998535 |
| Benzene+cycloprop-2-enylidene | 0.000926445 | 0.999462 | 0.000926445 | 0.999462 |
| PhCHCCH2+H                    | 0.000504551 | 0.999966 | 0.000504551 | 0.999966 |
| PhCCH+CH3                     | 9.08526e-06 | 0.999975 | 9.08526e-06 | 0.999975 |
| C2H2+PhCH2                    | 7.96612e-06 | 0.999983 | 7.96612e-06 | 0.999983 |
| PhCCCH3+H                     | 5.68575e-06 | 0.999989 | 5.68575e-06 | 0.999989 |
| Ph+MeAc                       | 5.25498e-06 | 0.999994 | 5.25498e-06 | 0.999994 |
| Benzene+cycloprop-1-enylidene | 2.67442e-06 | 0.999997 | 2.67442e-06 | 0.999997 |
| rad67                         | 1.51304e-06 | 0.999999 | 1.51304e-06 | 0.999999 |
| Ph+Allene                     | 7.25741e-07 | 0.999999 | 7.25741e-07 | 0.999999 |
| rad35                         | 6.38895e-07 | 1.000000 | 6.38895e-07 | 1.000000 |
| PhCH2CCH+H                    | 1.17254e-07 | 1.000000 | 1.17254e-07 | 1.000000 |
| PAH7+H                        | 7.42849e-08 | 1.000000 | 7.42849e-08 | 1.000000 |
| rad37                         | 2.11000e-08 | 1.000000 | 2.11000e-08 | 1.000000 |
| rad39                         | 2.08559e-08 | 1.000000 | 2.08559e-08 | 1.000000 |
| rad30                         | 1.24882e-08 | 1.000000 | 1.24882e-08 | 1.000000 |
| PAH9+H                        | 1.18133e-09 | 1.000000 | 1.18133e-09 | 1.000000 |
| rad38                         | 5.95177e-10 | 1.000000 | 5.95177e-10 | 1.000000 |
| PhcycC3H3_A+H                 | 1.74259e-10 | 1.000000 | 1.74259e-10 | 1.000000 |
| PAH10+CH3                     | 1.32940e-10 | 1.000000 | 1.32940e-10 | 1.000000 |
| rad60syn                      | 8.86998e-11 | 1.000000 | 8.86998e-11 | 1.000000 |
| PAH3+H                        | 6.60781e-11 | 1.000000 | 6.60781e-11 | 1.000000 |
| rad60anti                     | 4.52540e-11 | 1.000000 | 4.52540e-11 | 1.000000 |
| rad46                         | 4.02141e-11 | 1.000000 | 4.02141e-11 | 1.000000 |
| rad59                         | 1.23761e-11 | 1.000000 | 1.23761e-11 | 1.000000 |
| rad54                         | 4.79192e-12 | 1.000000 | 4.79192e-12 | 1.000000 |
| PhcycC3H3_B+H                 | 4.15196e-12 | 1.000000 | 4.15196e-12 | 1.000000 |
| rad43                         | 4.04632e-12 | 1.000000 | 4.04632e-12 | 1.000000 |
| Phenyl+cycC3H4                | 3.74742e-12 | 1.000000 | 0.000000    | 1.000000 |
| rad6                          | 3.20067e-12 | 1.000000 | 3.20067e-12 | 1.000000 |
| rad62                         | 9.00542e-13 | 1.000000 | 9.00542e-13 | 1.000000 |
| rad50                         | 6.60517e-13 | 1.000000 | 6.60517e-13 | 1.000000 |
| rad70                         | 1.82917e-13 | 1.000000 | 1.82917e-13 | 1.000000 |
| PAH1+H                        | 1.16448e-13 | 1.000000 | 1.16448e-13 | 1.000000 |
| rad55                         | 8.04598e-14 | 1.000000 | 8.04598e-14 | 1.000000 |
| rad52                         | 8.24556e-15 | 1.000000 | 8.24556e-15 | 1.000000 |
| rad58                         | 6.69521e-15 | 1.000000 | 6.69521e-15 | 1.000000 |
| rad34                         | 6.63777e-15 | 1.000000 | 6.63777e-15 | 1.000000 |
| rad51                         | 4.44087e-15 | 1.000000 | 4.44087e-15 | 1.000000 |
| rad28                         | 3.05821e-15 | 1.000000 | 3.05821e-15 | 1.000000 |
| rad2                          | 2.84605e-15 | 1.000000 | 2.84605e-15 | 1.000000 |
| rad41                         | 1.89640e-15 | 1.000000 | 1.89640e-15 | 1.000000 |
| rad42                         | 1.03295e-15 | 1.000000 | 1.03295e-15 | 1.000000 |
| rad26                         | 4.33349e-16 | 1.000000 | 4.33349e-16 | 1.000000 |
| rad7                          | 3.31734e-16 | 1.000000 | 3.31734e-16 | 1.000000 |
| rad1                          | 2.10722e-16 | 1.000000 | 2.10722e-16 | 1.000000 |
| rad10                         | 1.69586e-16 | 1.000000 | 1.69586e-16 | 1.000000 |
| rad65                         | 1.21289e-16 | 1.000000 | 1.21289e-16 | 1.000000 |
| rad11                         | 8.89444e-17 | 1.000000 | 8.89444e-17 | 1.000000 |
| rad53                         | 4.94706e-17 | 1.000000 | 4.94706e-17 | 1.000000 |
| rad3                          | 2.08980e-17 | 1.000000 | 2.08980e-17 | 1.000000 |
| rad64                         | 1.73303e-17 | 1.000000 | 1.73303e-17 | 1.000000 |
| rad4                          | 1.10149e-17 | 1.000000 | 1.10149e-17 | 1.000000 |
| rad61                         | 7.53479e-18 | 1.000000 | 7.53479e-18 | 1.000000 |
| rad13                         | 1.40172e-18 | 1.000000 | 1.40172e-18 | 1.000000 |
| rad9                          | 1.18894e-18 | 1.000000 | 1.18894e-18 | 1.000000 |
| rad56                         | 7.33285e-19 | 1.000000 | 7.33285e-19 | 1.000000 |
| rad23                         | 1.52370e-19 | 1.000000 | 1.52370e-19 | 1.000000 |
| rad68syn                      | 9.79930e-20 | 1.000000 | 9.79930e-20 | 1.000000 |

|           |             |         |             |         |
|-----------|-------------|---------|-------------|---------|
| rad68anti | 7.21184e-20 | 1.00000 | 7.21184e-20 | 1.00000 |
| rad33     | 2.70062e-21 | 1.00000 | 2.70062e-21 | 1.00000 |
| rad40syn  | 2.31154e-21 | 1.00000 | 2.31154e-21 | 1.00000 |
| rad45     | 2.27045e-21 | 1.00000 | 2.27045e-21 | 1.00000 |
| rad14     | 1.83664e-21 | 1.00000 | 1.83664e-21 | 1.00000 |
| rad40anti | 1.83275e-21 | 1.00000 | 1.83275e-21 | 1.00000 |
| rad27     | 1.74469e-21 | 1.00000 | 1.74469e-21 | 1.00000 |
| rad25     | 9.57247e-22 | 1.00000 | 9.57247e-22 | 1.00000 |
| PAH8+H    | 6.11966e-22 | 1.00000 | 6.11966e-22 | 1.00000 |
| rad15     | 5.69688e-22 | 1.00000 | 5.69688e-22 | 1.00000 |
| rad19anti | 3.67602e-22 | 1.00000 | 3.67602e-22 | 1.00000 |
| rad36     | 1.46805e-22 | 1.00000 | 1.46805e-22 | 1.00000 |
| rad73     | 9.48301e-23 | 1.00000 | 9.48301e-23 | 1.00000 |
| rad22     | 9.14795e-23 | 1.00000 | 9.14795e-23 | 1.00000 |
| rad71     | 1.44232e-24 | 1.00000 | 1.44232e-24 | 1.00000 |
| rad31     | 1.70705e-25 | 1.00000 | 1.70705e-25 | 1.00000 |
| rad20     | 3.83511e-26 | 1.00000 | 3.83511e-26 | 1.00000 |
| rad21     | 2.92172e-26 | 1.00000 | 2.92172e-26 | 1.00000 |
| rad47     | 1.96053e-26 | 1.00000 | 1.96053e-26 | 1.00000 |
| rad12     | 7.03524e-27 | 1.00000 | 7.03524e-27 | 1.00000 |
| rad5      | 1.49337e-27 | 1.00000 | 1.49337e-27 | 1.00000 |
| rad18     | 1.28308e-27 | 1.00000 | 1.28308e-27 | 1.00000 |
| rad24     | 2.72244e-29 | 1.00000 | 2.72244e-29 | 1.00000 |
| rad19syn  | 1.48909e-30 | 1.00000 | 1.48909e-30 | 1.00000 |
| rad8      | 1.87505e-56 | 1.00000 | 1.87505e-56 | 1.00000 |

0.100000000 Pa, 290.000000 K

=====

| Rate constant             | True (fraction)        | Effective (fraction)   |
|---------------------------|------------------------|------------------------|
| Total                     | 3.81171e-14 (1.00 )    | 3.81171e-14 (1.00 )    |
| Formation of rad19        | 3.80733e-14 (0.999 )   | 3.80733e-14 (0.999 )   |
| H-abstraction to cyc2enyl | 4.36868e-17 (0.00115 ) | 4.36868e-17 (0.00115 ) |
| H-abstraction to cyclenyl | 1.56861e-19 (4.12e-06) | 1.56861e-19 (4.12e-06) |

| species                       | PYtrue      | Cumul    | PYeffective | Cumul    |
|-------------------------------|-------------|----------|-------------|----------|
| Indene+H                      | 0.998283    | 0.998283 | 0.998283    | 0.998283 |
| Benzene+cycloprop-2-enylidene | 0.00114612  | 0.999430 | 0.00114612  | 0.999430 |
| PhCHCCH2+H                    | 0.000533451 | 0.999963 | 0.000533451 | 0.999963 |
| PhCCH+CH3                     | 9.60787e-06 | 0.999973 | 9.60787e-06 | 0.999973 |
| C2H2+PhCH2                    | 8.56076e-06 | 0.999981 | 8.56076e-06 | 0.999981 |
| PhCCCH3+H                     | 6.06272e-06 | 0.999987 | 6.06272e-06 | 0.999987 |
| Ph+MeAc                       | 5.68554e-06 | 0.999993 | 5.68554e-06 | 0.999993 |
| Benzene+cycloprop-1-enylidene | 4.11523e-06 | 0.999997 | 4.11523e-06 | 0.999997 |
| rad67                         | 1.63310e-06 | 0.999999 | 1.63310e-06 | 0.999999 |
| Ph+Allene                     | 8.12156e-07 | 0.999999 | 8.12156e-07 | 0.999999 |
| rad35                         | 6.87540e-07 | 1.00000  | 6.87540e-07 | 1.00000  |
| PhCH2CCH+H                    | 1.33690e-07 | 1.00000  | 1.33690e-07 | 1.00000  |
| PAH7+H                        | 8.16685e-08 | 1.00000  | 8.16685e-08 | 1.00000  |
| rad37                         | 2.33191e-08 | 1.00000  | 2.33191e-08 | 1.00000  |
| rad39                         | 2.29057e-08 | 1.00000  | 2.29057e-08 | 1.00000  |
| rad30                         | 1.34987e-08 | 1.00000  | 1.34987e-08 | 1.00000  |
| PAH9+H                        | 1.31223e-09 | 1.00000  | 1.31223e-09 | 1.00000  |
| rad38                         | 6.70338e-10 | 1.00000  | 6.70338e-10 | 1.00000  |
| PhcycC3H3_A+H                 | 2.32242e-10 | 1.00000  | 2.32242e-10 | 1.00000  |
| PAH10+CH3                     | 1.62621e-10 | 1.00000  | 1.62621e-10 | 1.00000  |
| rad60syn                      | 9.91677e-11 | 1.00000  | 9.91677e-11 | 1.00000  |
| PAH3+H                        | 7.70384e-11 | 1.00000  | 7.70384e-11 | 1.00000  |
| rad60anti                     | 5.07440e-11 | 1.00000  | 5.07440e-11 | 1.00000  |
| rad46                         | 4.56086e-11 | 1.00000  | 4.56086e-11 | 1.00000  |
| rad59                         | 1.43233e-11 | 1.00000  | 1.43233e-11 | 1.00000  |
| PhcycC3H3_B+H                 | 6.32698e-12 | 1.00000  | 6.32698e-12 | 1.00000  |
| rad54                         | 5.86510e-12 | 1.00000  | 5.86510e-12 | 1.00000  |
| Phenyl+cycC3H4                | 5.36584e-12 | 1.00000  | 0.00000     | 1.00000  |
| rad43                         | 4.80643e-12 | 1.00000  | 4.80643e-12 | 1.00000  |
| rad6                          | 2.44062e-12 | 1.00000  | 2.44062e-12 | 1.00000  |
| rad62                         | 1.06776e-12 | 1.00000  | 1.06776e-12 | 1.00000  |
| rad50                         | 7.96875e-13 | 1.00000  | 7.96875e-13 | 1.00000  |
| rad70                         | 2.34332e-13 | 1.00000  | 2.34332e-13 | 1.00000  |
| PAH1+H                        | 1.56696e-13 | 1.00000  | 1.56696e-13 | 1.00000  |
| rad55                         | 1.02931e-13 | 1.00000  | 1.02931e-13 | 1.00000  |
| rad52                         | 1.03673e-14 | 1.00000  | 1.03673e-14 | 1.00000  |
| rad34                         | 8.97421e-15 | 1.00000  | 8.97421e-15 | 1.00000  |
| rad58                         | 8.76880e-15 | 1.00000  | 8.76880e-15 | 1.00000  |
| rad51                         | 5.83278e-15 | 1.00000  | 5.83278e-15 | 1.00000  |
| rad41                         | 2.58959e-15 | 1.00000  | 2.58959e-15 | 1.00000  |
| rad28                         | 2.32827e-15 | 1.00000  | 2.32827e-15 | 1.00000  |
| rad2                          | 2.16709e-15 | 1.00000  | 2.16709e-15 | 1.00000  |
| rad42                         | 1.37594e-15 | 1.00000  | 1.37594e-15 | 1.00000  |



|           |             |         |             |         |
|-----------|-------------|---------|-------------|---------|
| rad26     | 3.30581e-16 | 1.00000 | 3.30581e-16 | 1.00000 |
| rad7      | 2.52331e-16 | 1.00000 | 2.52331e-16 | 1.00000 |
| rad1      | 1.62906e-16 | 1.00000 | 1.62906e-16 | 1.00000 |
| rad65     | 1.61326e-16 | 1.00000 | 1.61326e-16 | 1.00000 |
| rad10     | 1.29099e-16 | 1.00000 | 1.29099e-16 | 1.00000 |
| rad53     | 7.72577e-17 | 1.00000 | 7.72577e-17 | 1.00000 |
| rad11     | 6.76227e-17 | 1.00000 | 6.76227e-17 | 1.00000 |
| rad64     | 2.78325e-17 | 1.00000 | 2.78325e-17 | 1.00000 |
| rad3      | 1.59210e-17 | 1.00000 | 1.59210e-17 | 1.00000 |
| rad61     | 1.33273e-17 | 1.00000 | 1.33273e-17 | 1.00000 |
| rad4      | 8.42789e-18 | 1.00000 | 8.42789e-18 | 1.00000 |
| rad9      | 2.41444e-18 | 1.00000 | 2.41444e-18 | 1.00000 |
| rad56     | 1.35312e-18 | 1.00000 | 1.35312e-18 | 1.00000 |
| rad13     | 1.07389e-18 | 1.00000 | 1.07389e-18 | 1.00000 |
| rad68syn  | 1.82951e-19 | 1.00000 | 1.82951e-19 | 1.00000 |
| rad68anti | 1.34088e-19 | 1.00000 | 1.34088e-19 | 1.00000 |
| rad23     | 1.11741e-19 | 1.00000 | 1.11741e-19 | 1.00000 |
| rad40syn  | 4.85238e-21 | 1.00000 | 4.85238e-21 | 1.00000 |
| rad40anti | 3.84041e-21 | 1.00000 | 3.84041e-21 | 1.00000 |
| rad33     | 2.07650e-21 | 1.00000 | 2.07650e-21 | 1.00000 |
| rad45     | 1.66612e-21 | 1.00000 | 1.66612e-21 | 1.00000 |
| rad14     | 1.40415e-21 | 1.00000 | 1.40415e-21 | 1.00000 |
| PAH8+H    | 1.38868e-21 | 1.00000 | 1.38868e-21 | 1.00000 |
| rad19anti | 1.37225e-21 | 1.00000 | 1.37225e-21 | 1.00000 |
| rad27     | 1.33614e-21 | 1.00000 | 1.33614e-21 | 1.00000 |
| rad15     | 1.15636e-21 | 1.00000 | 1.15636e-21 | 1.00000 |
| rad25     | 7.33986e-22 | 1.00000 | 7.33986e-22 | 1.00000 |
| rad73     | 2.01535e-22 | 1.00000 | 2.01535e-22 | 1.00000 |
| rad36     | 1.08564e-22 | 1.00000 | 1.08564e-22 | 1.00000 |
| rad22     | 6.68325e-23 | 1.00000 | 6.68325e-23 | 1.00000 |
| rad71     | 3.38379e-24 | 1.00000 | 3.38379e-24 | 1.00000 |
| rad31     | 1.48770e-25 | 1.00000 | 1.48770e-25 | 1.00000 |
| rad20     | 3.20526e-26 | 1.00000 | 3.20526e-26 | 1.00000 |
| rad21     | 2.45586e-26 | 1.00000 | 2.45586e-26 | 1.00000 |
| rad47     | 2.39439e-26 | 1.00000 | 2.39439e-26 | 1.00000 |
| rad12     | 1.45565e-26 | 1.00000 | 1.45565e-26 | 1.00000 |
| rad5      | 1.18021e-27 | 1.00000 | 1.18021e-27 | 1.00000 |
| rad18     | 1.02026e-27 | 1.00000 | 1.02026e-27 | 1.00000 |
| rad24     | 2.02756e-29 | 1.00000 | 2.02756e-29 | 1.00000 |
| rad19syn  | 6.95957e-30 | 1.00000 | 6.95957e-30 | 1.00000 |
| rad8      | 3.82774e-56 | 1.00000 | 3.82774e-56 | 1.00000 |

0.100000000 Pa, 300.000000 K

=====

| Rate constant             | True (fraction)        | Effective (fraction)   |
|---------------------------|------------------------|------------------------|
| Total                     | 5.34809e-14 (1.00 )    | 5.34809e-14 (1.00 )    |
| Formation of rad19        | 5.34010e-14 (0.999 )   | 5.34010e-14 (0.999 )   |
| H-abstraction to cyc2enyl | 7.95823e-17 (0.00149 ) | 7.95823e-17 (0.00149 ) |
| H-abstraction to cyclenyl | 3.44981e-19 (6.45e-06) | 3.44981e-19 (6.45e-06) |

| species                       | PYtrue      | Cumul    | PYeffective | Cumul    |
|-------------------------------|-------------|----------|-------------|----------|
| Indene+H                      | 0.997939    | 0.997939 | 0.997939    | 0.997939 |
| Benzene+cycloprop-2-enylidene | 0.00148805  | 0.999427 | 0.00148805  | 0.999427 |
| PhCHCCH2+H                    | 0.000529750 | 0.999957 | 0.000529750 | 0.999957 |
| PhCCH+CH3                     | 1.04575e-05 | 0.999968 | 1.04575e-05 | 0.999968 |
| C2H2+PhCH2                    | 9.95310e-06 | 0.999978 | 9.95310e-06 | 0.999978 |
| Benzene+cycloprop-1-enylidene | 6.45054e-06 | 0.999984 | 6.45054e-06 | 0.999984 |
| PhCCCH3+H                     | 6.36653e-06 | 0.999990 | 6.36653e-06 | 0.999990 |
| Ph+MeAc                       | 5.99692e-06 | 0.999996 | 5.99692e-06 | 0.999996 |
| rad67                         | 1.76886e-06 | 0.999998 | 1.76886e-06 | 0.999998 |
| Ph+Allene                     | 8.16342e-07 | 0.999999 | 8.16342e-07 | 0.999999 |
| rad35                         | 7.31713e-07 | 1.000000 | 7.31713e-07 | 1.000000 |
| PhCH2CCH+H                    | 1.61945e-07 | 1.000000 | 1.61945e-07 | 1.000000 |
| PAH7+H                        | 1.00369e-07 | 1.000000 | 1.00369e-07 | 1.000000 |
| rad37                         | 2.83137e-08 | 1.000000 | 2.83137e-08 | 1.000000 |
| rad39                         | 2.47610e-08 | 1.000000 | 2.47610e-08 | 1.000000 |
| rad30                         | 1.39360e-08 | 1.000000 | 1.39360e-08 | 1.000000 |
| PAH9+H                        | 1.67546e-09 | 1.000000 | 1.67546e-09 | 1.000000 |
| rad38                         | 7.71363e-10 | 1.000000 | 7.71363e-10 | 1.000000 |
| PhcycC3H3_A+H                 | 3.25286e-10 | 1.000000 | 3.25286e-10 | 1.000000 |
| PAH10+CH3                     | 2.37210e-10 | 1.000000 | 2.37210e-10 | 1.000000 |
| rad60syn                      | 1.06796e-10 | 1.000000 | 1.06796e-10 | 1.000000 |
| PAH3+H                        | 9.84348e-11 | 1.000000 | 9.84348e-11 | 1.000000 |
| rad60anti                     | 5.51374e-11 | 1.000000 | 5.51374e-11 | 1.000000 |
| rad46                         | 5.44310e-11 | 1.000000 | 5.44310e-11 | 1.000000 |
| rad6                          | 2.42118e-11 | 1.000000 | 2.42118e-11 | 1.000000 |
| rad59                         | 1.67195e-11 | 1.000000 | 1.67195e-11 | 1.000000 |
| PhcycC3H3_B+H                 | 1.05897e-11 | 1.000000 | 1.05897e-11 | 1.000000 |

|                |             |         |             |         |
|----------------|-------------|---------|-------------|---------|
| Phenyl+cycC3H4 | 8.20984e-12 | 1.00000 | 0.00000     | 1.00000 |
| rad54          | 7.63771e-12 | 1.00000 | 7.63771e-12 | 1.00000 |
| rad43          | 5.65375e-12 | 1.00000 | 5.65375e-12 | 1.00000 |
| rad62          | 1.25122e-12 | 1.00000 | 1.25122e-12 | 1.00000 |
| rad50          | 1.03047e-12 | 1.00000 | 1.03047e-12 | 1.00000 |
| rad70          | 3.12473e-13 | 1.00000 | 3.12473e-13 | 1.00000 |
| PAH1+H         | 1.93353e-13 | 1.00000 | 1.93353e-13 | 1.00000 |
| rad55          | 1.33372e-13 | 1.00000 | 1.33372e-13 | 1.00000 |
| rad28          | 2.31132e-14 | 1.00000 | 2.31132e-14 | 1.00000 |
| rad2           | 2.16852e-14 | 1.00000 | 2.16852e-14 | 1.00000 |
| rad52          | 1.45373e-14 | 1.00000 | 1.45373e-14 | 1.00000 |
| rad34          | 1.28220e-14 | 1.00000 | 1.28220e-14 | 1.00000 |
| rad58          | 1.11178e-14 | 1.00000 | 1.11178e-14 | 1.00000 |
| rad51          | 8.22272e-15 | 1.00000 | 8.22272e-15 | 1.00000 |
| rad9           | 6.99355e-15 | 1.00000 | 6.99355e-15 | 1.00000 |
| rad41          | 3.58143e-15 | 1.00000 | 3.58143e-15 | 1.00000 |
| rad26          | 3.30664e-15 | 1.00000 | 3.30664e-15 | 1.00000 |
| rad7           | 2.60155e-15 | 1.00000 | 2.60155e-15 | 1.00000 |
| rad42          | 1.81774e-15 | 1.00000 | 1.81774e-15 | 1.00000 |
| rad1           | 1.63406e-15 | 1.00000 | 1.63406e-15 | 1.00000 |
| rad10          | 1.25878e-15 | 1.00000 | 1.25878e-15 | 1.00000 |
| rad11          | 6.73647e-16 | 1.00000 | 6.73647e-16 | 1.00000 |
| rad65          | 2.32200e-16 | 1.00000 | 2.32200e-16 | 1.00000 |
| rad3           | 1.67957e-16 | 1.00000 | 1.67957e-16 | 1.00000 |
| rad53          | 1.29339e-16 | 1.00000 | 1.29339e-16 | 1.00000 |
| rad4           | 8.35255e-17 | 1.00000 | 8.35255e-17 | 1.00000 |
| rad64          | 4.98536e-17 | 1.00000 | 4.98536e-17 | 1.00000 |
| rad61          | 2.74901e-17 | 1.00000 | 2.74901e-17 | 1.00000 |
| rad19anti      | 1.47634e-17 | 1.00000 | 1.47634e-17 | 1.00000 |
| rad13          | 1.25262e-17 | 1.00000 | 1.25262e-17 | 1.00000 |
| rad15          | 3.97738e-18 | 1.00000 | 3.97738e-18 | 1.00000 |
| rad56          | 3.01544e-18 | 1.00000 | 3.01544e-18 | 1.00000 |
| rad23          | 2.81421e-18 | 1.00000 | 2.81421e-18 | 1.00000 |
| rad68syn       | 3.96691e-19 | 1.00000 | 3.96691e-19 | 1.00000 |
| rad68anti      | 2.85721e-19 | 1.00000 | 2.85721e-19 | 1.00000 |
| rad45          | 4.82037e-20 | 1.00000 | 4.82037e-20 | 1.00000 |
| rad33          | 2.97811e-20 | 1.00000 | 2.97811e-20 | 1.00000 |
| rad27          | 1.80430e-20 | 1.00000 | 1.80430e-20 | 1.00000 |
| rad14          | 1.74521e-20 | 1.00000 | 1.74521e-20 | 1.00000 |
| rad40syn       | 1.34626e-20 | 1.00000 | 1.34626e-20 | 1.00000 |
| rad25          | 1.10943e-20 | 1.00000 | 1.10943e-20 | 1.00000 |
| rad40anti      | 1.02835e-20 | 1.00000 | 1.02835e-20 | 1.00000 |
| PAH8+H         | 5.54151e-21 | 1.00000 | 5.54151e-21 | 1.00000 |
| rad22          | 2.66398e-21 | 1.00000 | 2.66398e-21 | 1.00000 |
| rad36          | 1.64292e-21 | 1.00000 | 1.64292e-21 | 1.00000 |
| rad73          | 6.55200e-22 | 1.00000 | 6.55200e-22 | 1.00000 |
| rad12          | 7.26137e-23 | 1.00000 | 7.26137e-23 | 1.00000 |
| rad71          | 2.13553e-23 | 1.00000 | 2.13553e-23 | 1.00000 |
| rad31          | 1.47969e-23 | 1.00000 | 1.47969e-23 | 1.00000 |
| rad20          | 1.03501e-23 | 1.00000 | 1.03501e-23 | 1.00000 |
| rad21          | 1.01808e-23 | 1.00000 | 1.01808e-23 | 1.00000 |
| rad5           | 5.33034e-24 | 1.00000 | 5.33034e-24 | 1.00000 |
| rad19syn       | 1.12386e-24 | 1.00000 | 1.12386e-24 | 1.00000 |
| rad18          | 9.34024e-25 | 1.00000 | 9.34024e-25 | 1.00000 |
| rad47          | 1.76839e-25 | 1.00000 | 1.76839e-25 | 1.00000 |
| rad24          | 7.59802e-28 | 1.00000 | 7.59802e-28 | 1.00000 |
| rad72          | 4.68294e-30 | 1.00000 | 4.68294e-30 | 1.00000 |
| rad8           | 3.07179e-42 | 1.00000 | 3.07179e-42 | 1.00000 |

0.100000000 Pa, 310.000000 K

| Rate constant                 | True (fraction)        | Effective (fraction)   |             |          |
|-------------------------------|------------------------|------------------------|-------------|----------|
| Total                         | 5.92544e-14 (1.00 )    | 5.92544e-14 (1.00 )    |             |          |
| Formation of rad19            | 5.91462e-14 (0.998 )   | 5.91462e-14 (0.998 )   |             |          |
| H-abstraction to cyc2enyl     | 1.07628e-16 (0.00182 ) | 1.07628e-16 (0.00182 ) |             |          |
| H-abstraction to cyclenyl     | 5.62537e-19 (9.49e-06) | 5.62537e-19 (9.49e-06) |             |          |
| species                       | PYtrue                 | Cumul                  | PYeffective | Cumul    |
| Indene+H                      | 0.997536               | 0.997536               | 0.997536    | 0.997536 |
| Benzene+cycloprop-2-enylidene | 0.00181637             | 0.999353               | 0.00181637  | 0.999353 |
| PhCHCCH2+H                    | 0.000599117            | 0.999952               | 0.000599117 | 0.999952 |
| PhCCH+CH3                     | 1.07854e-05            | 0.999963               | 1.07854e-05 | 0.999963 |
| C2H2+PhCH2                    | 9.93963e-06            | 0.999973               | 9.93963e-06 | 0.999973 |
| Benzene+cycloprop-1-enylidene | 9.49359e-06            | 0.999982               | 9.49359e-06 | 0.999982 |
| PhCCCH3+H                     | 6.92631e-06            | 0.999989               | 6.92631e-06 | 0.999989 |
| Ph+MeAc                       | 6.69251e-06            | 0.999996               | 6.69251e-06 | 0.999996 |
| rad67                         | 1.91369e-06            | 0.999998               | 1.91369e-06 | 0.999998 |
| Ph+Allene                     | 1.02490e-06            | 0.999999               | 1.02490e-06 | 0.999999 |

|                |             |          |             |          |
|----------------|-------------|----------|-------------|----------|
| rad35          | 8.00793e-07 | 0.999999 | 8.00793e-07 | 0.999999 |
| PhCH2CCH+H     | 1.75228e-07 | 1.000000 | 1.75228e-07 | 1.000000 |
| PAH7+H         | 9.93662e-08 | 1.000000 | 9.93662e-08 | 1.000000 |
| rad37          | 2.86891e-08 | 1.000000 | 2.86891e-08 | 1.000000 |
| rad39          | 2.78038e-08 | 1.000000 | 2.78038e-08 | 1.000000 |
| rad30          | 1.58739e-08 | 1.000000 | 1.58739e-08 | 1.000000 |
| PAH9+H         | 1.63306e-09 | 1.000000 | 1.63306e-09 | 1.000000 |
| rad38          | 8.58699e-10 | 1.000000 | 8.58699e-10 | 1.000000 |
| PhcycC3H3_A+H  | 4.09093e-10 | 1.000000 | 4.09093e-10 | 1.000000 |
| PAH10+CH3      | 2.45111e-10 | 1.000000 | 2.45111e-10 | 1.000000 |
| rad60syn       | 1.25024e-10 | 1.000000 | 1.25024e-10 | 1.000000 |
| PAH3+H         | 1.05767e-10 | 1.000000 | 1.05767e-10 | 1.000000 |
| rad60anti      | 6.43615e-11 | 1.000000 | 6.43615e-11 | 1.000000 |
| rad46          | 5.92385e-11 | 1.000000 | 5.92385e-11 | 1.000000 |
| rad59          | 1.93707e-11 | 1.000000 | 1.93707e-11 | 1.000000 |
| PhcycC3H3_B+H  | 1.41414e-11 | 1.000000 | 1.41414e-11 | 1.000000 |
| Phenyl+cycC3H4 | 1.07882e-11 | 1.000000 | 0.000000    | 1.000000 |
| rad54          | 8.84667e-12 | 1.000000 | 8.84667e-12 | 1.000000 |
| rad43          | 6.82723e-12 | 1.000000 | 6.82723e-12 | 1.000000 |
| rad62          | 1.50894e-12 | 1.000000 | 1.50894e-12 | 1.000000 |
| rad6           | 1.44003e-12 | 1.000000 | 1.44003e-12 | 1.000000 |
| rad50          | 1.17282e-12 | 1.000000 | 1.17282e-12 | 1.000000 |
| rad70          | 3.85773e-13 | 1.000000 | 3.85773e-13 | 1.000000 |
| PAH1+H         | 2.82635e-13 | 1.000000 | 2.82635e-13 | 1.000000 |
| rad55          | 1.68912e-13 | 1.000000 | 1.68912e-13 | 1.000000 |
| rad52          | 1.65466e-14 | 1.000000 | 1.65466e-14 | 1.000000 |
| rad34          | 1.63340e-14 | 1.000000 | 1.63340e-14 | 1.000000 |
| rad58          | 1.50782e-14 | 1.000000 | 1.50782e-14 | 1.000000 |
| rad51          | 1.01229e-14 | 1.000000 | 1.01229e-14 | 1.000000 |
| rad41          | 4.78214e-15 | 1.000000 | 4.78214e-15 | 1.000000 |
| rad42          | 2.42208e-15 | 1.000000 | 2.42208e-15 | 1.000000 |
| rad28          | 1.36956e-15 | 1.000000 | 1.36956e-15 | 1.000000 |
| rad2           | 1.27805e-15 | 1.000000 | 1.27805e-15 | 1.000000 |
| rad65          | 2.86424e-16 | 1.000000 | 2.86424e-16 | 1.000000 |
| rad26          | 1.95973e-16 | 1.000000 | 1.95973e-16 | 1.000000 |
| rad53          | 1.81386e-16 | 1.000000 | 1.81386e-16 | 1.000000 |
| rad7           | 1.48215e-16 | 1.000000 | 1.48215e-16 | 1.000000 |
| rad1           | 9.93434e-17 | 1.000000 | 9.93434e-17 | 1.000000 |
| rad10          | 7.61289e-17 | 1.000000 | 7.61289e-17 | 1.000000 |
| rad64          | 6.83769e-17 | 1.000000 | 6.83769e-17 | 1.000000 |
| rad11          | 3.96912e-17 | 1.000000 | 3.96912e-17 | 1.000000 |
| rad61          | 3.85152e-17 | 1.000000 | 3.85152e-17 | 1.000000 |
| rad9           | 1.25108e-17 | 1.000000 | 1.25108e-17 | 1.000000 |
| rad3           | 9.40502e-18 | 1.000000 | 9.40502e-18 | 1.000000 |
| rad4           | 5.02639e-18 | 1.000000 | 5.02639e-18 | 1.000000 |
| rad56          | 4.19582e-18 | 1.000000 | 4.19582e-18 | 1.000000 |
| rad13          | 6.40100e-19 | 1.000000 | 6.40100e-19 | 1.000000 |
| rad68syn       | 5.77860e-19 | 1.000000 | 5.77860e-19 | 1.000000 |
| rad68anti      | 4.20632e-19 | 1.000000 | 4.20632e-19 | 1.000000 |
| rad23          | 6.19693e-20 | 1.000000 | 6.19693e-20 | 1.000000 |
| rad19anti      | 1.89606e-20 | 1.000000 | 1.89606e-20 | 1.000000 |
| rad40syn       | 1.84823e-20 | 1.000000 | 1.84823e-20 | 1.000000 |
| rad40anti      | 1.45826e-20 | 1.000000 | 1.45826e-20 | 1.000000 |
| rad15          | 5.98893e-21 | 1.000000 | 5.98893e-21 | 1.000000 |
| PAH8+H         | 5.98744e-21 | 1.000000 | 5.98744e-21 | 1.000000 |
| rad33          | 1.24730e-21 | 1.000000 | 1.24730e-21 | 1.000000 |
| rad45          | 9.27450e-22 | 1.000000 | 9.27450e-22 | 1.000000 |
| rad14          | 8.35078e-22 | 1.000000 | 8.35078e-22 | 1.000000 |
| rad27          | 7.97889e-22 | 1.000000 | 7.97889e-22 | 1.000000 |
| rad73          | 7.85906e-22 | 1.000000 | 7.85906e-22 | 1.000000 |
| rad25          | 4.38289e-22 | 1.000000 | 4.38289e-22 | 1.000000 |
| rad36          | 6.14906e-23 | 1.000000 | 6.14906e-23 | 1.000000 |
| rad22          | 3.67736e-23 | 1.000000 | 3.67736e-23 | 1.000000 |
| rad71          | 1.53983e-23 | 1.000000 | 1.53983e-23 | 1.000000 |
| rad31          | 1.28555e-25 | 1.000000 | 1.28555e-25 | 1.000000 |
| rad12          | 7.86018e-26 | 1.000000 | 7.86018e-26 | 1.000000 |
| rad47          | 3.79333e-26 | 1.000000 | 3.79333e-26 | 1.000000 |
| rad20          | 2.29777e-26 | 1.000000 | 2.29777e-26 | 1.000000 |
| rad21          | 1.78226e-26 | 1.000000 | 1.78226e-26 | 1.000000 |
| rad5           | 7.68714e-28 | 1.000000 | 7.68714e-28 | 1.000000 |
| rad18          | 6.61872e-28 | 1.000000 | 6.61872e-28 | 1.000000 |
| rad19syn       | 1.62279e-28 | 1.000000 | 1.62279e-28 | 1.000000 |
| rad24          | 1.16377e-29 | 1.000000 | 1.16377e-29 | 1.000000 |
| rad8           | 1.72484e-55 | 1.000000 | 1.72484e-55 | 1.000000 |

0.100000000 Pa, 400.000000 K

| Rate constant | True (fraction)     | Effective (fraction) |
|---------------|---------------------|----------------------|
| Total         | 1.29463e-13 (1.00 ) | 1.29463e-13 (1.00 )  |

Formation of rad19 | 1.28526e-13 (0.993 ) 1.28526e-13 (0.993 )  
H-abstraction to cyc2enyl | 9.19357e-16 (0.00710 ) 9.19357e-16 (0.00710 )  
H-abstraction to cyclenyl | 1.69485e-17 (0.000131) 1.69485e-17 (0.000131)

| species                       | PYtrue      | Cumul    | PYeffective | Cumul    |
|-------------------------------|-------------|----------|-------------|----------|
| Indene+H                      | 0.991683    | 0.991683 | 0.991683    | 0.991683 |
| Benzene+cycloprop-2-enylidene | 0.00710133  | 0.998784 | 0.00710133  | 0.998784 |
| PhCHCCH2+H                    | 0.00100581  | 0.999790 | 0.00100581  | 0.999790 |
| Benzene+cycloprop-1-enylidene | 0.000130914 | 0.999921 | 0.000130914 | 0.999921 |
| C2H2+PhCH2                    | 2.22409e-05 | 0.999943 | 2.22409e-05 | 0.999943 |
| PhCCH+CH3                     | 1.95073e-05 | 0.999962 | 1.95073e-05 | 0.999962 |
| Ph+MeAc                       | 1.45170e-05 | 0.999977 | 1.45170e-05 | 0.999977 |
| PhCCCH3+H                     | 1.31947e-05 | 0.999990 | 1.31947e-05 | 0.999990 |
| rad67                         | 4.22150e-06 | 0.999994 | 4.22150e-06 | 0.999994 |
| Ph+Allene                     | 2.97124e-06 | 0.999997 | 2.97124e-06 | 0.999997 |
| rad35                         | 1.68901e-06 | 0.999999 | 1.68901e-06 | 0.999999 |
| PhCH2CCH+H                    | 6.92462e-07 | 1.000000 | 6.92462e-07 | 1.000000 |
| PAH7+H                        | 2.89506e-07 | 1.000000 | 2.89506e-07 | 1.000000 |
| rad37                         | 8.82146e-08 | 1.000000 | 8.82146e-08 | 1.000000 |
| rad39                         | 7.04573e-08 | 1.000000 | 7.04573e-08 | 1.000000 |
| rad30                         | 3.41218e-08 | 1.000000 | 3.41218e-08 | 1.000000 |
| PAH9+H                        | 5.66740e-09 | 1.000000 | 5.66740e-09 | 1.000000 |
| PhcycC3H3_A+H                 | 4.88900e-09 | 1.000000 | 4.88900e-09 | 1.000000 |
| rad38                         | 3.07311e-09 | 1.000000 | 3.07311e-09 | 1.000000 |
| PAH10+CH3                     | 1.94142e-09 | 1.000000 | 1.94142e-09 | 1.000000 |
| PAH3+H                        | 5.34405e-10 | 1.000000 | 5.34405e-10 | 1.000000 |
| PhcycC3H3_B+H                 | 4.15152e-10 | 1.000000 | 4.15152e-10 | 1.000000 |
| rad60syn                      | 3.79094e-10 | 1.000000 | 3.79094e-10 | 1.000000 |
| rad46                         | 2.31145e-10 | 1.000000 | 2.31145e-10 | 1.000000 |
| Phenyl+cycC3H4                | 2.22328e-10 | 1.000000 | 0.000000    | 1.000000 |
| rad60anti                     | 2.01831e-10 | 1.000000 | 2.01831e-10 | 1.000000 |
| rad59                         | 8.49227e-11 | 1.000000 | 8.49227e-11 | 1.000000 |
| rad54                         | 6.39095e-11 | 1.000000 | 6.39095e-11 | 1.000000 |
| rad43                         | 3.46914e-11 | 1.000000 | 3.46914e-11 | 1.000000 |
| rad50                         | 8.28209e-12 | 1.000000 | 8.28209e-12 | 1.000000 |
| rad62                         | 7.28218e-12 | 1.000000 | 7.28218e-12 | 1.000000 |
| rad6                          | 4.39275e-12 | 1.000000 | 4.39275e-12 | 1.000000 |
| rad70                         | 3.85072e-12 | 1.000000 | 3.85072e-12 | 1.000000 |
| PAH1+H                        | 3.60825e-12 | 1.000000 | 3.60825e-12 | 1.000000 |
| rad9                          | 2.04223e-12 | 1.000000 | 2.04223e-12 | 1.000000 |
| rad55                         | 1.59920e-12 | 1.000000 | 1.59920e-12 | 1.000000 |
| rad34                         | 2.43820e-13 | 1.000000 | 2.43820e-13 | 1.000000 |
| rad52                         | 1.72495e-13 | 1.000000 | 1.72495e-13 | 1.000000 |
| rad58                         | 1.69175e-13 | 1.000000 | 1.69175e-13 | 1.000000 |
| rad51                         | 1.42813e-13 | 1.000000 | 1.42813e-13 | 1.000000 |
| rad41                         | 6.83265e-14 | 1.000000 | 6.83265e-14 | 1.000000 |
| rad19anti                     | 4.77861e-14 | 1.000000 | 4.77861e-14 | 1.000000 |
| rad42                         | 2.71672e-14 | 1.000000 | 2.71672e-14 | 1.000000 |
| rad2                          | 2.40734e-14 | 1.000000 | 2.40734e-14 | 1.000000 |
| rad53                         | 6.87755e-15 | 1.000000 | 6.87755e-15 | 1.000000 |
| rad65                         | 4.39022e-15 | 1.000000 | 4.39022e-15 | 1.000000 |
| rad28                         | 3.98484e-15 | 1.000000 | 3.98484e-15 | 1.000000 |
| rad61                         | 3.43056e-15 | 1.000000 | 3.43056e-15 | 1.000000 |
| rad64                         | 3.05720e-15 | 1.000000 | 3.05720e-15 | 1.000000 |
| rad26                         | 2.55905e-15 | 1.000000 | 2.55905e-15 | 1.000000 |
| rad1                          | 2.24036e-15 | 1.000000 | 2.24036e-15 | 1.000000 |
| rad10                         | 1.40525e-15 | 1.000000 | 1.40525e-15 | 1.000000 |
| rad15                         | 1.21928e-15 | 1.000000 | 1.21928e-15 | 1.000000 |
| rad23                         | 1.04212e-15 | 1.000000 | 1.04212e-15 | 1.000000 |
| rad56                         | 5.30840e-16 | 1.000000 | 5.30840e-16 | 1.000000 |
| rad7                          | 4.79481e-16 | 1.000000 | 4.79481e-16 | 1.000000 |
| rad3                          | 1.75193e-16 | 1.000000 | 1.75193e-16 | 1.000000 |
| rad11                         | 1.26087e-16 | 1.000000 | 1.26087e-16 | 1.000000 |
| rad4                          | 9.22630e-17 | 1.000000 | 9.22630e-17 | 1.000000 |
| rad68syn                      | 7.48168e-17 | 1.000000 | 7.48168e-17 | 1.000000 |
| rad68anti                     | 5.24779e-17 | 1.000000 | 5.24779e-17 | 1.000000 |
| rad45                         | 3.75683e-17 | 1.000000 | 3.75683e-17 | 1.000000 |
| rad40syn                      | 6.39175e-18 | 1.000000 | 6.39175e-18 | 1.000000 |
| PAH8+H                        | 5.94605e-18 | 1.000000 | 5.94605e-18 | 1.000000 |
| rad40anti                     | 4.74413e-18 | 1.000000 | 4.74413e-18 | 1.000000 |
| rad13                         | 2.53170e-18 | 1.000000 | 2.53170e-18 | 1.000000 |
| rad36                         | 1.43991e-18 | 1.000000 | 1.43991e-18 | 1.000000 |
| rad73                         | 4.85955e-19 | 1.000000 | 4.85955e-19 | 1.000000 |
| rad22                         | 4.69160e-19 | 1.000000 | 4.69160e-19 | 1.000000 |
| rad19syn                      | 2.04434e-19 | 1.000000 | 2.04434e-19 | 1.000000 |
| rad31                         | 5.06211e-20 | 1.000000 | 5.06211e-20 | 1.000000 |
| rad71                         | 4.98004e-20 | 1.000000 | 4.98004e-20 | 1.000000 |
| rad12                         | 3.45598e-20 | 1.000000 | 3.45598e-20 | 1.000000 |
| rad27                         | 2.20141e-20 | 1.000000 | 2.20141e-20 | 1.000000 |

|       |             |         |             |         |
|-------|-------------|---------|-------------|---------|
| rad14 | 1.60679e-20 | 1.00000 | 1.60679e-20 | 1.00000 |
| rad33 | 6.60565e-21 | 1.00000 | 6.60565e-21 | 1.00000 |
| rad25 | 2.31835e-21 | 1.00000 | 2.31835e-21 | 1.00000 |
| rad47 | 7.64570e-24 | 1.00000 | 7.64570e-24 | 1.00000 |
| rad21 | 7.22711e-24 | 1.00000 | 7.22711e-24 | 1.00000 |
| rad20 | 6.63972e-24 | 1.00000 | 6.63972e-24 | 1.00000 |
| rad5  | 2.47732e-24 | 1.00000 | 2.47732e-24 | 1.00000 |
| rad72 | 7.66822e-25 | 1.00000 | 7.66822e-25 | 1.00000 |
| rad24 | 4.51492e-25 | 1.00000 | 4.51492e-25 | 1.00000 |
| rad18 | 3.81682e-25 | 1.00000 | 3.81682e-25 | 1.00000 |
| rad8  | 6.69364e-39 | 1.00000 | 6.69364e-39 | 1.00000 |

0.100000000 Pa, 500.000000 K

| Rate constant             | True (fraction)        | Effective (fraction)   |
|---------------------------|------------------------|------------------------|
| Total                     | 2.52837e-13 (1.00 )    | 2.52837e-13 (1.00 )    |
| Formation of rad19        | 2.47941e-13 (0.981 )   | 2.47941e-13 (0.981 )   |
| H-abstraction to cyc2enyl | 4.69058e-15 (0.0186 )  | 4.69058e-15 (0.0186 )  |
| H-abstraction to cyclenyl | 2.05381e-16 (0.000812) | 2.05381e-16 (0.000812) |

| species                       | PYtrue      | Cumul    | PYeffective | Cumul    |
|-------------------------------|-------------|----------|-------------|----------|
| Indene+H                      | 0.978428    | 0.978428 | 0.978428    | 0.978428 |
| Benzene+cycloprop-2-enylidene | 0.0185518   | 0.996979 | 0.0185518   | 0.996979 |
| PhCHCCH2+H                    | 0.00202475  | 0.999004 | 0.00202475  | 0.999004 |
| Benzene+cycloprop-1-enylidene | 0.000812306 | 0.999816 | 0.000812306 | 0.999816 |
| C2H2+PhCH2                    | 5.13332e-05 | 0.999868 | 5.13332e-05 | 0.999868 |
| PhCCH+CH3                     | 3.71170e-05 | 0.999905 | 3.71170e-05 | 0.999905 |
| Ph+MeAc                       | 3.63098e-05 | 0.999941 | 3.63098e-05 | 0.999941 |
| PhCCCH3+H                     | 2.84448e-05 | 0.999970 | 2.84448e-05 | 0.999970 |
| Ph+Allene                     | 1.09445e-05 | 0.999981 | 1.09445e-05 | 0.999981 |
| rad67                         | 1.05822e-05 | 0.999991 | 1.05822e-05 | 0.999991 |
| rad35                         | 4.10933e-06 | 0.999995 | 4.10933e-06 | 0.999995 |
| PhCH2CCH+H                    | 2.95333e-06 | 0.999998 | 2.95333e-06 | 0.999998 |
| PAH7+H                        | 8.51365e-07 | 0.999999 | 8.51365e-07 | 0.999999 |
| rad37                         | 2.86677e-07 | 0.999999 | 2.86677e-07 | 0.999999 |
| rad39                         | 2.02070e-07 | 0.999999 | 2.02070e-07 | 0.999999 |
| rad30                         | 8.94912e-08 | 1.000000 | 8.94912e-08 | 1.000000 |
| PhcycC3H3_A+H                 | 5.02852e-08 | 1.000000 | 5.02852e-08 | 1.000000 |
| PAH9+H                        | 2.06853e-08 | 1.000000 | 2.06853e-08 | 1.000000 |
| PAH10+CH3                     | 1.44055e-08 | 1.000000 | 1.44055e-08 | 1.000000 |
| rad38                         | 1.31825e-08 | 1.000000 | 1.31825e-08 | 1.000000 |
| PhcycC3H3_B+H                 | 7.81120e-09 | 1.000000 | 7.81120e-09 | 1.000000 |
| Phenyl+cycC3H4                | 3.55660e-09 | 1.000000 | 0.000000    | 1.000000 |
| PAH3+H                        | 2.97651e-09 | 1.000000 | 2.97651e-09 | 1.000000 |
| rad60syn                      | 1.43182e-09 | 1.000000 | 1.43182e-09 | 1.000000 |
| rad46                         | 1.04902e-09 | 1.000000 | 1.04902e-09 | 1.000000 |
| rad60anti                     | 7.84369e-10 | 1.000000 | 7.84369e-10 | 1.000000 |
| rad54                         | 4.68589e-10 | 1.000000 | 4.68589e-10 | 1.000000 |
| rad59                         | 4.42104e-10 | 1.000000 | 4.42104e-10 | 1.000000 |
| rad43                         | 1.96282e-10 | 1.000000 | 1.96282e-10 | 1.000000 |
| rad9                          | 1.62815e-10 | 1.000000 | 1.62815e-10 | 1.000000 |
| rad50                         | 6.65678e-11 | 1.000000 | 6.65678e-11 | 1.000000 |
| PAH1+H                        | 4.68873e-11 | 1.000000 | 4.68873e-11 | 1.000000 |
| rad62                         | 3.77616e-11 | 1.000000 | 3.77616e-11 | 1.000000 |
| rad70                         | 3.76405e-11 | 1.000000 | 3.76405e-11 | 1.000000 |
| rad55                         | 1.50967e-11 | 1.000000 | 1.50967e-11 | 1.000000 |
| rad6                          | 9.33638e-12 | 1.000000 | 9.33638e-12 | 1.000000 |
| rad19anti                     | 6.68658e-12 | 1.000000 | 6.68658e-12 | 1.000000 |
| rad34                         | 3.22061e-12 | 1.000000 | 3.22061e-12 | 1.000000 |
| rad51                         | 2.08238e-12 | 1.000000 | 2.08238e-12 | 1.000000 |
| rad58                         | 2.05100e-12 | 1.000000 | 2.05100e-12 | 1.000000 |
| rad52                         | 1.88554e-12 | 1.000000 | 1.88554e-12 | 1.000000 |
| rad41                         | 8.64014e-13 | 1.000000 | 8.64014e-13 | 1.000000 |
| rad2                          | 8.28635e-13 | 1.000000 | 8.28635e-13 | 1.000000 |
| rad23                         | 6.14992e-13 | 1.000000 | 6.14992e-13 | 1.000000 |
| rad42                         | 2.74840e-13 | 1.000000 | 2.74840e-13 | 1.000000 |
| rad53                         | 1.70497e-13 | 1.000000 | 1.70497e-13 | 1.000000 |
| rad61                         | 1.40686e-13 | 1.000000 | 1.40686e-13 | 1.000000 |
| rad15                         | 1.04092e-13 | 1.000000 | 1.04092e-13 | 1.000000 |
| rad1                          | 9.89991e-14 | 1.000000 | 9.89991e-14 | 1.000000 |
| rad64                         | 7.73087e-14 | 1.000000 | 7.73087e-14 | 1.000000 |
| rad65                         | 6.64348e-14 | 1.000000 | 6.64348e-14 | 1.000000 |
| rad45                         | 6.57401e-14 | 1.000000 | 6.57401e-14 | 1.000000 |
| rad10                         | 4.07086e-14 | 1.000000 | 4.07086e-14 | 1.000000 |
| rad26                         | 3.71264e-14 | 1.000000 | 3.71264e-14 | 1.000000 |
| rad56                         | 2.62130e-14 | 1.000000 | 2.62130e-14 | 1.000000 |
| rad3                          | 8.27588e-15 | 1.000000 | 8.27588e-15 | 1.000000 |
| rad28                         | 5.67672e-15 | 1.000000 | 5.67672e-15 | 1.000000 |

|           |             |          |             |          |
|-----------|-------------|----------|-------------|----------|
| rad4      | 4.67095e-15 | 1.000000 | 4.67095e-15 | 1.000000 |
| rad68syn  | 3.88302e-15 | 1.000000 | 3.88302e-15 | 1.000000 |
| rad36     | 3.21163e-15 | 1.000000 | 3.21163e-15 | 1.000000 |
| rad68anti | 2.67442e-15 | 1.000000 | 2.67442e-15 | 1.000000 |
| rad19syn  | 1.45990e-15 | 1.000000 | 1.45990e-15 | 1.000000 |
| rad7      | 1.06402e-15 | 1.000000 | 1.06402e-15 | 1.000000 |
| PAH8+H    | 8.48521e-16 | 1.000000 | 8.48521e-16 | 1.000000 |
| rad40syn  | 5.56024e-16 | 1.000000 | 5.56024e-16 | 1.000000 |
| rad40anti | 4.06759e-16 | 1.000000 | 4.06759e-16 | 1.000000 |
| rad11     | 2.88841e-16 | 1.000000 | 2.88841e-16 | 1.000000 |
| rad22     | 1.98697e-16 | 1.000000 | 1.98697e-16 | 1.000000 |
| rad73     | 6.94119e-17 | 1.000000 | 6.94119e-17 | 1.000000 |
| rad31     | 1.77789e-17 | 1.000000 | 1.77789e-17 | 1.000000 |
| rad71     | 1.44292e-17 | 1.000000 | 1.44292e-17 | 1.000000 |
| rad12     | 7.19335e-18 | 1.000000 | 7.19335e-18 | 1.000000 |
| rad13     | 6.40121e-18 | 1.000000 | 6.40121e-18 | 1.000000 |
| rad27     | 7.15396e-19 | 1.000000 | 7.15396e-19 | 1.000000 |
| rad14     | 4.59557e-19 | 1.000000 | 4.59557e-19 | 1.000000 |
| rad33     | 1.97306e-20 | 1.000000 | 1.97306e-20 | 1.000000 |
| rad72     | 1.23576e-20 | 1.000000 | 1.23576e-20 | 1.000000 |
| rad25     | 6.01419e-21 | 1.000000 | 6.01419e-21 | 1.000000 |
| rad47     | 5.02545e-22 | 1.000000 | 5.02545e-22 | 1.000000 |
| rad24     | 4.71652e-22 | 1.000000 | 4.71652e-22 | 1.000000 |
| rad21     | 1.71041e-22 | 1.000000 | 1.71041e-22 | 1.000000 |
| rad20     | 1.67621e-22 | 1.000000 | 1.67621e-22 | 1.000000 |
| rad18     | 8.45666e-24 | 1.000000 | 8.45666e-24 | 1.000000 |
| rad5      | 2.17458e-24 | 1.000000 | 2.17458e-24 | 1.000000 |
| rad8      | 1.56978e-34 | 1.000000 | 1.56978e-34 | 1.000000 |

0.100000000 Pa, 600.000000 K

=====

| Rate constant             | True (fraction)        | Effective (fraction)   |
|---------------------------|------------------------|------------------------|
| Total                     | 4.35570e-13 (1.00 )    | 4.35570e-13 (1.00 )    |
| Formation of rad19        | 4.18892e-13 (0.962 )   | 4.18892e-13 (0.962 )   |
| H-abstraction to cyc2enyl | 1.54751e-14 (0.0355 )  | 1.54751e-14 (0.0355 )  |
| H-abstraction to cyclenyl | 1.20343e-15 (0.00276 ) | 1.20343e-15 (0.00276 ) |

| species                       | PYtrue      | Cumul    | PYeffective | Cumul    |
|-------------------------------|-------------|----------|-------------|----------|
| Indene+H                      | 0.957276    | 0.957276 | 0.957276    | 0.957276 |
| Benzene+cycloprop-2-enylidene | 0.0355285   | 0.992805 | 0.0355285   | 0.992805 |
| PhCHCCH2+H                    | 0.00402175  | 0.996826 | 0.00402175  | 0.996826 |
| Benzene+cycloprop-1-enylidene | 0.00276289  | 0.999589 | 0.00276289  | 0.999589 |
| C2H2+PhCH2                    | 0.000111945 | 0.999701 | 0.000111945 | 0.999701 |
| Ph+MeAc                       | 8.57431e-05 | 0.999787 | 8.57431e-05 | 0.999787 |
| PhCCH+CH3                     | 6.75062e-05 | 0.999854 | 6.75062e-05 | 0.999854 |
| PhCCCH3+H                     | 5.90389e-05 | 0.999913 | 5.90389e-05 | 0.999913 |
| Ph+Allene                     | 3.56614e-05 | 0.999949 | 3.56614e-05 | 0.999949 |
| rad67                         | 2.54032e-05 | 0.999975 | 2.54032e-05 | 0.999975 |
| PhCH2CCH+H                    | 1.09197e-05 | 0.999985 | 1.09197e-05 | 0.999985 |
| rad35                         | 9.63315e-06 | 0.999995 | 9.63315e-06 | 0.999995 |
| PAH7+H                        | 2.26695e-06 | 0.999997 | 2.26695e-06 | 0.999997 |
| rad37                         | 8.64922e-07 | 0.999998 | 8.64922e-07 | 0.999998 |
| rad39                         | 5.20223e-07 | 0.999999 | 5.20223e-07 | 0.999999 |
| PhcycC3H3_A+H                 | 3.56547e-07 | 0.999999 | 3.56547e-07 | 0.999999 |
| rad30                         | 2.27444e-07 | 0.999999 | 2.27444e-07 | 0.999999 |
| PAH10+CH3                     | 8.50972e-08 | 0.999999 | 8.50972e-08 | 0.999999 |
| PhcycC3H3_B+H                 | 8.44059e-08 | 0.999999 | 8.44059e-08 | 0.999999 |
| PAH9+H                        | 7.13093e-08 | 1.000000 | 7.13093e-08 | 1.000000 |
| rad38                         | 5.21332e-08 | 1.000000 | 5.21332e-08 | 1.000000 |
| Phenyl+cycC3H4                | 3.58023e-08 | 1.000000 | 0.000000    | 1.000000 |
| PAH3+H                        | 1.45699e-08 | 1.000000 | 1.45699e-08 | 1.000000 |
| rad60syn                      | 5.03986e-09 | 1.000000 | 5.03986e-09 | 1.000000 |
| rad46                         | 4.37660e-09 | 1.000000 | 4.37660e-09 | 1.000000 |
| rad60anti                     | 2.82894e-09 | 1.000000 | 2.82894e-09 | 1.000000 |
| rad54                         | 2.63018e-09 | 1.000000 | 2.63018e-09 | 1.000000 |
| rad59                         | 2.03136e-09 | 1.000000 | 2.03136e-09 | 1.000000 |
| rad43                         | 9.14346e-10 | 1.000000 | 9.14346e-10 | 1.000000 |
| rad9                          | 7.70810e-10 | 1.000000 | 7.70810e-10 | 1.000000 |
| rad50                         | 4.49314e-10 | 1.000000 | 4.49314e-10 | 1.000000 |
| PAH1+H                        | 4.05941e-10 | 1.000000 | 4.05941e-10 | 1.000000 |
| rad70                         | 2.63835e-10 | 1.000000 | 2.63835e-10 | 1.000000 |
| rad62                         | 1.58023e-10 | 1.000000 | 1.58023e-10 | 1.000000 |
| rad55                         | 1.01574e-10 | 1.000000 | 1.01574e-10 | 1.000000 |
| rad19anti                     | 4.93612e-11 | 1.000000 | 4.93612e-11 | 1.000000 |
| rad6                          | 4.34984e-11 | 1.000000 | 4.34984e-11 | 1.000000 |
| rad34                         | 2.81370e-11 | 1.000000 | 2.81370e-11 | 1.000000 |
| rad51                         | 2.22156e-11 | 1.000000 | 2.22156e-11 | 1.000000 |
| rad58                         | 1.79778e-11 | 1.000000 | 1.79778e-11 | 1.000000 |

|           |             |          |             |          |
|-----------|-------------|----------|-------------|----------|
| rad23     | 1.64381e-11 | 1.000000 | 1.64381e-11 | 1.000000 |
| rad52     | 1.61229e-11 | 1.000000 | 1.61229e-11 | 1.000000 |
| rad2      | 1.07476e-11 | 1.000000 | 1.07476e-11 | 1.000000 |
| rad41     | 7.27924e-12 | 1.000000 | 7.27924e-12 | 1.000000 |
| rad61     | 2.69300e-12 | 1.000000 | 2.69300e-12 | 1.000000 |
| rad45     | 2.33909e-12 | 1.000000 | 2.33909e-12 | 1.000000 |
| rad53     | 2.26564e-12 | 1.000000 | 2.26564e-12 | 1.000000 |
| rad42     | 1.88142e-12 | 1.000000 | 1.88142e-12 | 1.000000 |
| rad1      | 1.63596e-12 | 1.000000 | 1.63596e-12 | 1.000000 |
| rad64     | 9.96330e-13 | 1.000000 | 9.96330e-13 | 1.000000 |
| rad65     | 7.16789e-13 | 1.000000 | 7.16789e-13 | 1.000000 |
| rad56     | 5.47964e-13 | 1.000000 | 5.47964e-13 | 1.000000 |
| rad15     | 4.83903e-13 | 1.000000 | 4.83903e-13 | 1.000000 |
| rad10     | 3.24759e-13 | 1.000000 | 3.24759e-13 | 1.000000 |
| rad26     | 2.28092e-13 | 1.000000 | 2.28092e-13 | 1.000000 |
| rad36     | 1.93993e-13 | 1.000000 | 1.93993e-13 | 1.000000 |
| rad19syn  | 1.52297e-13 | 1.000000 | 1.52297e-13 | 1.000000 |
| rad3      | 1.28774e-13 | 1.000000 | 1.28774e-13 | 1.000000 |
| rad68syn  | 8.55792e-14 | 1.000000 | 8.55792e-14 | 1.000000 |
| rad4      | 8.25218e-14 | 1.000000 | 8.25218e-14 | 1.000000 |
| rad68anti | 5.82093e-14 | 1.000000 | 5.82093e-14 | 1.000000 |
| PAH8+H    | 3.73902e-14 | 1.000000 | 3.73902e-14 | 1.000000 |
| rad28     | 2.14063e-14 | 1.000000 | 2.14063e-14 | 1.000000 |
| rad40syn  | 1.74049e-14 | 1.000000 | 1.74049e-14 | 1.000000 |
| rad40anti | 1.27022e-14 | 1.000000 | 1.27022e-14 | 1.000000 |
| rad7      | 5.38390e-15 | 1.000000 | 5.38390e-15 | 1.000000 |
| rad22     | 4.73662e-15 | 1.000000 | 4.73662e-15 | 1.000000 |
| rad73     | 4.21294e-15 | 1.000000 | 4.21294e-15 | 1.000000 |
| rad71     | 2.11165e-15 | 1.000000 | 2.11165e-15 | 1.000000 |
| rad11     | 1.54279e-15 | 1.000000 | 1.54279e-15 | 1.000000 |
| rad12     | 1.53847e-15 | 1.000000 | 1.53847e-15 | 1.000000 |
| rad31     | 3.24890e-16 | 1.000000 | 3.24890e-16 | 1.000000 |
| rad13     | 3.97225e-17 | 1.000000 | 3.97225e-17 | 1.000000 |
| rad72     | 3.13568e-17 | 1.000000 | 3.13568e-17 | 1.000000 |
| rad27     | 6.75701e-18 | 1.000000 | 6.75701e-18 | 1.000000 |
| rad14     | 4.09716e-18 | 1.000000 | 4.09716e-18 | 1.000000 |
| rad33     | 1.67187e-19 | 1.000000 | 1.67187e-19 | 1.000000 |
| rad25     | 3.83832e-20 | 1.000000 | 3.83832e-20 | 1.000000 |
| rad24     | 2.55598e-20 | 1.000000 | 2.55598e-20 | 1.000000 |
| rad47     | 1.30411e-20 | 1.000000 | 1.30411e-20 | 1.000000 |
| rad21     | 7.62945e-21 | 1.000000 | 7.62945e-21 | 1.000000 |
| rad20     | 6.04510e-21 | 1.000000 | 6.04510e-21 | 1.000000 |
| rad18     | 2.50708e-22 | 1.000000 | 2.50708e-22 | 1.000000 |
| rad5      | 4.67262e-24 | 1.000000 | 4.67262e-24 | 1.000000 |
| rad8      | 2.39998e-29 | 1.000000 | 2.39998e-29 | 1.000000 |

0.100000000 Pa, 700.000000 K

| Rate constant             | True (fraction)        | Effective (fraction)   |
|---------------------------|------------------------|------------------------|
| Total                     | 6.91694e-13 (1.00 )    | 6.91694e-13 (1.00 )    |
| Formation of rad19        | 6.47922e-13 (0.937 )   | 6.47922e-13 (0.937 )   |
| H-abstraction to cyc2enyl | 3.91858e-14 (0.0567 )  | 3.91858e-14 (0.0567 )  |
| H-abstraction to cyclenyl | 4.58543e-15 (0.00663 ) | 4.58542e-15 (0.00663 ) |

| species                       | PYtrue      | Cumul    | PYeffective | Cumul    |
|-------------------------------|-------------|----------|-------------|----------|
| Indene+H                      | 0.928261    | 0.928261 | 0.928261    | 0.928261 |
| Benzene+cycloprop-2-enylidene | 0.0566520   | 0.984913 | 0.0566520   | 0.984913 |
| PhCHCCH2+H                    | 0.00759867  | 0.992512 | 0.00759867  | 0.992512 |
| Benzene+cycloprop-1-enylidene | 0.00662927  | 0.999141 | 0.00662927  | 0.999141 |
| C2H2+PhCH2                    | 0.000223372 | 0.999364 | 0.000223372 | 0.999364 |
| Ph+MeAc                       | 0.000184768 | 0.999549 | 0.000184768 | 0.999549 |
| PhCCH+CH3                     | 0.000114476 | 0.999664 | 0.000114476 | 0.999664 |
| PhCCCH3+H                     | 0.000114177 | 0.999778 | 0.000114177 | 0.999778 |
| Ph+Allene                     | 9.86552e-05 | 0.999876 | 9.86552e-05 | 0.999876 |
| rad67                         | 5.61635e-05 | 0.999933 | 5.61635e-05 | 0.999933 |
| PhCH2CCH+H                    | 3.37398e-05 | 0.999966 | 3.37398e-05 | 0.999966 |
| rad35                         | 2.09208e-05 | 0.999987 | 2.09208e-05 | 0.999987 |
| PAH7+H                        | 5.25058e-06 | 0.999993 | 5.25059e-06 | 0.999993 |
| rad37                         | 2.31780e-06 | 0.999995 | 2.31780e-06 | 0.999995 |
| PhcycC3H3_A+H                 | 1.84683e-06 | 0.999997 | 1.84683e-06 | 0.999997 |
| rad39                         | 1.15815e-06 | 0.999998 | 1.15815e-06 | 0.999998 |
| PhcycC3H3_B+H                 | 5.98044e-07 | 0.999998 | 5.98044e-07 | 0.999998 |
| rad30                         | 5.35196e-07 | 0.999999 | 5.35196e-07 | 0.999999 |
| PAH10+CH3                     | 3.93667e-07 | 0.999999 | 3.93667e-07 | 0.999999 |
| Phenyl+cycC3H4                | 2.47273e-07 | 1.000000 | 0.00000     | 0.999999 |
| PAH9+H                        | 2.20584e-07 | 1.000000 | 2.20584e-07 | 1.000000 |
| rad38                         | 1.79368e-07 | 1.00000  | 1.79368e-07 | 1.000000 |
| PAH3+H                        | 5.98880e-08 | 1.00000  | 5.98880e-08 | 1.000000 |

|           |             |         |             |          |
|-----------|-------------|---------|-------------|----------|
| rad46     | 1.59419e-08 | 1.00000 | 1.59419e-08 | 1.000000 |
| rad60syn  | 1.57209e-08 | 1.00000 | 1.57209e-08 | 1.000000 |
| rad54     | 1.11966e-08 | 1.00000 | 1.11966e-08 | 1.000000 |
| rad60anti | 9.00560e-09 | 1.00000 | 9.00560e-09 | 1.000000 |
| rad59     | 7.88134e-09 | 1.00000 | 7.88134e-09 | 1.000000 |
| rad9      | 7.11732e-09 | 1.00000 | 7.11733e-09 | 1.000000 |
| rad43     | 3.45982e-09 | 1.00000 | 3.45982e-09 | 1.000000 |
| PAH1+H    | 2.46040e-09 | 1.00000 | 2.46040e-09 | 1.000000 |
| rad50     | 2.44829e-09 | 1.00000 | 2.44829e-09 | 1.000000 |
| rad70     | 1.34954e-09 | 1.00000 | 1.34954e-09 | 1.000000 |
| rad62     | 5.31199e-10 | 1.00000 | 5.31200e-10 | 1.000000 |
| rad55     | 4.95241e-10 | 1.00000 | 4.95241e-10 | 1.000000 |
| rad51     | 1.73367e-10 | 1.00000 | 1.73367e-10 | 1.000000 |
| rad34     | 1.70540e-10 | 1.00000 | 1.70540e-10 | 1.000000 |
| rad58     | 1.15517e-10 | 1.00000 | 1.15517e-10 | 1.000000 |
| rad52     | 1.05662e-10 | 1.00000 | 1.05662e-10 | 1.000000 |
| rad6      | 8.31243e-11 | 1.00000 | 8.31243e-11 | 1.000000 |
| rad19anti | 6.95815e-11 | 1.00000 | 6.95815e-11 | 1.000000 |
| rad23     | 6.16312e-11 | 1.00000 | 6.16312e-11 | 1.000000 |
| rad41     | 4.33941e-11 | 1.00000 | 4.33941e-11 | 1.000000 |
| rad2      | 3.11451e-11 | 1.00000 | 3.11451e-11 | 1.000000 |
| rad61     | 2.94066e-11 | 1.00000 | 2.94066e-11 | 1.000000 |
| rad53     | 1.83995e-11 | 1.00000 | 1.83995e-11 | 1.000000 |
| rad42     | 9.22925e-12 | 1.00000 | 9.22926e-12 | 1.000000 |
| rad45     | 8.69836e-12 | 1.00000 | 8.69836e-12 | 1.000000 |
| rad64     | 7.69198e-12 | 1.00000 | 7.69198e-12 | 1.000000 |
| rad1      | 6.42469e-12 | 1.00000 | 6.42469e-12 | 1.000000 |
| rad56     | 6.14375e-12 | 1.00000 | 6.14376e-12 | 1.000000 |
| rad65     | 5.58133e-12 | 1.00000 | 5.58133e-12 | 1.000000 |
| rad15     | 3.15977e-12 | 1.00000 | 3.15977e-12 | 1.000000 |
| rad12     | 1.18620e-12 | 1.00000 | 1.18620e-12 | 1.000000 |
| rad68syn  | 1.01886e-12 | 1.00000 | 1.01886e-12 | 1.000000 |
| rad36     | 9.99020e-13 | 1.00000 | 9.99020e-13 | 1.000000 |
| rad19syn  | 8.87889e-13 | 1.00000 | 8.87889e-13 | 1.000000 |
| PAH8+H    | 7.33370e-13 | 1.00000 | 7.33370e-13 | 1.000000 |
| rad10     | 7.14075e-13 | 1.00000 | 7.14076e-13 | 1.000000 |
| rad68anti | 6.86704e-13 | 1.00000 | 6.86704e-13 | 1.000000 |
| rad26     | 4.52264e-13 | 1.00000 | 4.52264e-13 | 1.000000 |
| rad3      | 3.61460e-13 | 1.00000 | 3.61461e-13 | 1.000000 |
| rad4      | 2.70303e-13 | 1.00000 | 2.70303e-13 | 1.000000 |
| rad40syn  | 2.68859e-13 | 1.00000 | 2.68859e-13 | 1.000000 |
| rad40anti | 1.97155e-13 | 1.00000 | 1.97155e-13 | 1.000000 |
| rad73     | 9.64914e-14 | 1.00000 | 9.64914e-14 | 1.000000 |
| rad71     | 5.63065e-14 | 1.00000 | 5.63065e-14 | 1.000000 |
| rad28     | 3.96343e-14 | 1.00000 | 3.96343e-14 | 1.000000 |
| rad22     | 1.81418e-14 | 1.00000 | 1.81418e-14 | 1.000000 |
| rad7      | 1.18631e-14 | 1.00000 | 1.18631e-14 | 1.000000 |
| rad11     | 3.71996e-15 | 1.00000 | 3.71997e-15 | 1.000000 |
| rad31     | 9.71162e-16 | 1.00000 | 9.71162e-16 | 1.000000 |
| rad72     | 7.67909e-16 | 1.00000 | 7.67909e-16 | 1.000000 |
| rad13     | 1.23192e-16 | 1.00000 | 1.23192e-16 | 1.000000 |
| rad27     | 1.92883e-17 | 1.00000 | 1.92883e-17 | 1.000000 |
| rad14     | 1.08232e-17 | 1.00000 | 1.08232e-17 | 1.000000 |
| rad24     | 2.20518e-18 | 1.00000 | 2.20518e-18 | 1.000000 |
| rad33     | 9.57767e-19 | 1.00000 | 9.57767e-19 | 1.000000 |
| rad21     | 4.69763e-19 | 1.00000 | 4.69763e-19 | 1.000000 |
| rad20     | 1.54886e-19 | 1.00000 | 1.54886e-19 | 1.000000 |
| rad47     | 1.29455e-19 | 1.00000 | 1.29455e-19 | 1.000000 |
| rad25     | 1.24527e-19 | 1.00000 | 1.24527e-19 | 1.000000 |
| rad18     | 2.16853e-21 | 1.00000 | 2.16853e-21 | 1.000000 |
| rad5      | 1.11041e-23 | 1.00000 | 1.11041e-23 | 1.000000 |
| rad8      | 5.34859e-24 | 1.00000 | 5.34859e-24 | 1.000000 |

0.100000000 Pa, 800.000000 K

| Rate constant             | True (fraction)       | Effective (fraction)  |
|---------------------------|-----------------------|-----------------------|
| Total                     | 1.03759e-12 (1.00 )   | 1.03758e-12 (1.00 )   |
| Formation of rad19        | 9.41065e-13 (0.907 )  | 9.41063e-13 (0.907 )  |
| H-abstraction to cyc2enyl | 8.32953e-14 (0.0803 ) | 8.32953e-14 (0.0803 ) |
| H-abstraction to cyclenyl | 1.32261e-14 (0.0127 ) | 1.32261e-14 (0.0127 ) |

| species                       | PYtrue      | Cumul    | PYeffective | Cumul    |
|-------------------------------|-------------|----------|-------------|----------|
| Indene+H                      | 0.891850    | 0.891850 | 0.891851    | 0.891851 |
| Benzene+cycloprop-2-enylidene | 0.0802780   | 0.972128 | 0.0802781   | 0.972129 |
| PhCHCCH2+H                    | 0.0134628   | 0.985591 | 0.0134629   | 0.985592 |
| Benzene+cycloprop-1-enylidene | 0.0127470   | 0.998338 | 0.0127470   | 0.998339 |
| C2H2+PhCH2                    | 0.000407116 | 0.998745 | 0.000407117 | 0.998746 |
| Ph+MeAc                       | 0.000361157 | 0.999106 | 0.000361157 | 0.999107 |



|                |             |          |             |          |
|----------------|-------------|----------|-------------|----------|
| Ph+Allene      | 0.000232353 | 0.999339 | 0.000232354 | 0.999340 |
| PhCCCH3+H      | 0.000203980 | 0.999543 | 0.000203980 | 0.999544 |
| PhCCH+CH3      | 0.000180557 | 0.999723 | 0.000180558 | 0.999724 |
| rad67          | 0.000113181 | 0.999836 | 0.000113180 | 0.999837 |
| PhCH2CCH+H     | 8.78015e-05 | 0.999924 | 8.78016e-05 | 0.999925 |
| rad35          | 4.16152e-05 | 0.999966 | 4.16153e-05 | 0.999967 |
| PAH7+H         | 1.05805e-05 | 0.999976 | 1.05805e-05 | 0.999977 |
| PhcycC3H3_A+H  | 7.41249e-06 | 0.999984 | 7.41250e-06 | 0.999985 |
| rad37          | 5.46707e-06 | 0.999989 | 5.46707e-06 | 0.999990 |
| PhcycC3H3_B+H  | 3.06162e-06 | 0.999992 | 3.06163e-06 | 0.999993 |
| rad39          | 2.23435e-06 | 0.999995 | 2.23436e-06 | 0.999996 |
| PAH10+CH3      | 1.45406e-06 | 0.999996 | 1.45406e-06 | 0.999997 |
| Phenyl+cycC3H4 | 1.26413e-06 | 0.999997 | 0.00000     | 0.999997 |
| rad30          | 1.14941e-06 | 0.999998 | 1.14941e-06 | 0.999998 |
| PAH9+H         | 6.06404e-07 | 0.999999 | 6.06405e-07 | 0.999999 |
| rad38          | 5.31354e-07 | 1.000000 | 5.31355e-07 | 0.999999 |
| PAH3+H         | 2.06583e-07 | 1.000000 | 2.06583e-07 | 1.000000 |
| rad9           | 1.22918e-07 | 1.000000 | 1.22918e-07 | 1.000000 |
| rad46          | 5.04005e-08 | 1.000000 | 5.04006e-08 | 1.000000 |
| rad60syn       | 4.30170e-08 | 1.000000 | 4.30171e-08 | 1.000000 |
| rad54          | 3.72671e-08 | 1.000000 | 3.72671e-08 | 1.000000 |
| rad59          | 2.58057e-08 | 1.000000 | 2.58057e-08 | 1.000000 |
| rad60anti      | 2.50646e-08 | 1.000000 | 2.50647e-08 | 1.000000 |
| PAH1+H         | 1.11144e-08 | 1.000000 | 1.11144e-08 | 1.000000 |
| rad50          | 1.08651e-08 | 1.000000 | 1.08651e-08 | 1.000000 |
| rad43          | 1.08274e-08 | 1.000000 | 1.08274e-08 | 1.000000 |
| rad70          | 5.27897e-09 | 1.000000 | 5.27898e-09 | 1.000000 |
| rad55          | 1.83210e-09 | 1.000000 | 1.83210e-09 | 1.000000 |
| rad62          | 1.46973e-09 | 1.000000 | 1.46973e-09 | 1.000000 |
| rad51          | 1.02456e-09 | 1.000000 | 1.02456e-09 | 1.000000 |
| rad34          | 7.64325e-10 | 1.000000 | 7.64326e-10 | 1.000000 |
| rad58          | 5.66379e-10 | 1.000000 | 5.66380e-10 | 1.000000 |
| rad52          | 5.42756e-10 | 1.000000 | 5.42756e-10 | 1.000000 |
| rad61          | 2.09298e-10 | 1.000000 | 2.09298e-10 | 1.000000 |
| rad41          | 1.94673e-10 | 1.000000 | 1.94674e-10 | 1.000000 |
| rad53          | 1.01550e-10 | 1.000000 | 1.01550e-10 | 1.000000 |
| rad23          | 9.19972e-11 | 1.000000 | 9.19981e-11 | 1.000000 |
| rad6           | 8.15887e-11 | 1.000000 | 8.15887e-11 | 1.000000 |
| rad12          | 6.63783e-11 | 1.000000 | 6.63784e-11 | 1.000000 |
| rad19anti      | 6.02870e-11 | 1.000000 | 6.02871e-11 | 1.000000 |
| rad56          | 4.32305e-11 | 1.000000 | 4.32306e-11 | 1.000000 |
| rad64          | 4.01549e-11 | 1.000000 | 4.01550e-11 | 1.000000 |
| rad2           | 3.61984e-11 | 1.000000 | 3.61985e-11 | 1.000000 |
| rad15          | 3.48726e-11 | 1.000000 | 3.48726e-11 | 1.000000 |
| rad42          | 3.44893e-11 | 1.000000 | 3.44894e-11 | 1.000000 |
| rad65          | 3.26898e-11 | 1.000000 | 3.26899e-11 | 1.000000 |
| rad45          | 1.59037e-11 | 1.000000 | 1.59037e-11 | 1.000000 |
| rad1           | 9.11038e-12 | 1.000000 | 9.11038e-12 | 1.000000 |
| PAH8+H         | 8.15273e-12 | 1.000000 | 8.15273e-12 | 1.000000 |
| rad68syn       | 7.67890e-12 | 1.000000 | 7.67890e-12 | 1.000000 |
| rad68anti      | 5.13913e-12 | 1.000000 | 5.13914e-12 | 1.000000 |
| rad40syn       | 2.49311e-12 | 1.000000 | 2.49312e-12 | 1.000000 |
| rad40anti      | 1.84426e-12 | 1.000000 | 1.84426e-12 | 1.000000 |
| rad36          | 1.79118e-12 | 1.000000 | 1.79118e-12 | 1.000000 |
| rad19syn       | 1.44428e-12 | 1.000000 | 1.44428e-12 | 1.000000 |
| rad73          | 1.18078e-12 | 1.000000 | 1.18078e-12 | 1.000000 |
| rad10          | 8.48616e-13 | 1.000000 | 8.48617e-13 | 1.000000 |
| rad71          | 6.99000e-13 | 1.000000 | 6.99001e-13 | 1.000000 |
| rad26          | 4.58120e-13 | 1.000000 | 4.58121e-13 | 1.000000 |
| rad3           | 3.92366e-13 | 1.000000 | 3.92366e-13 | 1.000000 |
| rad4           | 3.09647e-13 | 1.000000 | 3.09647e-13 | 1.000000 |
| rad28          | 3.98660e-14 | 1.000000 | 3.98661e-14 | 1.000000 |
| rad22          | 2.83228e-14 | 1.000000 | 2.83228e-14 | 1.000000 |
| rad7           | 1.47051e-14 | 1.000000 | 1.47052e-14 | 1.000000 |
| rad11          | 5.30906e-15 | 1.000000 | 5.30906e-15 | 1.000000 |
| rad72          | 4.94894e-15 | 1.000000 | 4.94894e-15 | 1.000000 |
| rad31          | 1.51033e-15 | 1.000000 | 1.51033e-15 | 1.000000 |
| rad24          | 4.05035e-16 | 1.000000 | 4.05036e-16 | 1.000000 |
| rad13          | 2.69361e-16 | 1.000000 | 2.69361e-16 | 1.000000 |
| rad21          | 1.37155e-16 | 1.000000 | 1.37155e-16 | 1.000000 |
| rad27          | 3.10270e-17 | 1.000000 | 3.10271e-17 | 1.000000 |
| rad33          | 2.68154e-17 | 1.000000 | 2.68154e-17 | 1.000000 |
| rad20          | 2.39997e-17 | 1.000000 | 2.39997e-17 | 1.000000 |
| rad14          | 1.55236e-17 | 1.000000 | 1.55236e-17 | 1.000000 |
| rad47          | 8.56847e-19 | 1.000000 | 8.56847e-19 | 1.000000 |
| rad25          | 6.02962e-19 | 1.000000 | 6.02962e-19 | 1.000000 |
| rad8           | 2.40054e-19 | 1.000000 | 2.40054e-19 | 1.000000 |
| rad18          | 3.36822e-20 | 1.000000 | 3.36823e-20 | 1.000000 |
| rad5           | 2.29946e-23 | 1.000000 | 2.29947e-23 | 1.000000 |

0.100000000 Pa, 900.000000 K

| Rate constant             | True (fraction)       | Effective (fraction)  |
|---------------------------|-----------------------|-----------------------|
| Total                     | 1.49199e-12 (1.00 )   | 1.49199e-12 (1.00 )   |
| Formation of rad19        | 1.30395e-12 (0.874 )  | 1.30394e-12 (0.874 )  |
| H-abstraction to cyc2enyl | 1.56554e-13 (0.105 )  | 1.56554e-13 (0.105 )  |
| H-abstraction to cyclenyl | 3.14892e-14 (0.0211 ) | 3.14890e-14 (0.0211 ) |

| species                       | PYtrue      | Cumul    | PYeffective | Cumul    |
|-------------------------------|-------------|----------|-------------|----------|
| Indene+H                      | 0.848696    | 0.848696 | 0.848701    | 0.848701 |
| Benzene+cycloprop-2-enylidene | 0.104929    | 0.953626 | 0.104930    | 0.953631 |
| PhCHCCH2+H                    | 0.0222955   | 0.975921 | 0.0222955   | 0.975926 |
| Benzene+cycloprop-1-enylidene | 0.0211054   | 0.997027 | 0.0211054   | 0.997032 |
| C2H2+PhCH2                    | 0.000683914 | 0.997710 | 0.000683918 | 0.997716 |
| Ph+MeAc                       | 0.000643452 | 0.998354 | 0.000643456 | 0.998359 |
| Ph+Allene                     | 0.000474234 | 0.998828 | 0.000474236 | 0.998833 |
| PhCCCH3+H                     | 0.000337175 | 0.999165 | 0.000337176 | 0.999171 |
| PhCCH+CH3                     | 0.000266844 | 0.999432 | 0.000266845 | 0.999437 |
| rad67                         | 0.000208271 | 0.999640 | 0.000208272 | 0.999646 |
| PhCH2CCH+H                    | 0.000196594 | 0.999837 | 0.000196596 | 0.999842 |
| rad35                         | 7.58797e-05 | 0.999913 | 7.58801e-05 | 0.999918 |
| PhcycC3H3_A+H                 | 2.42123e-05 | 0.999937 | 2.42124e-05 | 0.999942 |
| PAH7+H                        | 1.88387e-05 | 0.999956 | 1.88388e-05 | 0.999961 |
| PhcycC3H3_B+H                 | 1.21581e-05 | 0.999968 | 1.21581e-05 | 0.999973 |
| rad37                         | 1.14064e-05 | 0.999979 | 1.14064e-05 | 0.999985 |
| Phenyl+cycC3H4                | 5.07995e-06 | 0.999985 | 0.000000    | 0.999985 |
| PAH10+CH3                     | 4.40663e-06 | 0.999989 | 4.40665e-06 | 0.999989 |
| rad39                         | 3.79906e-06 | 0.999993 | 3.79907e-06 | 0.999993 |
| rad30                         | 2.25191e-06 | 0.999995 | 2.25193e-06 | 0.999995 |
| PAH9+H                        | 1.48920e-06 | 0.999997 | 1.48921e-06 | 0.999997 |
| rad38                         | 1.36550e-06 | 0.999998 | 1.36551e-06 | 0.999998 |
| PAH3+H                        | 6.06529e-07 | 0.999998 | 6.06532e-07 | 0.999999 |
| rad9                          | 4.90664e-07 | 0.999999 | 4.90666e-07 | 0.999999 |
| rad46                         | 1.39567e-07 | 0.999999 | 1.39568e-07 | 0.999999 |
| rad60syn                      | 1.03811e-07 | 0.999999 | 1.03812e-07 | 0.999999 |
| rad54                         | 1.00690e-07 | 0.999999 | 1.00691e-07 | 1.000000 |
| rad59                         | 7.22905e-08 | 0.999999 | 7.22909e-08 | 1.000000 |
| rad60anti                     | 6.13599e-08 | 0.999999 | 6.13602e-08 | 1.000000 |
| rad50                         | 4.01549e-08 | 0.999999 | 4.01552e-08 | 1.000000 |
| PAH1+H                        | 3.95076e-08 | 1.000000 | 3.95078e-08 | 1.000000 |
| rad43                         | 2.87127e-08 | 1.000000 | 2.87128e-08 | 1.000000 |
| rad70                         | 1.65496e-08 | 1.000000 | 1.65497e-08 | 1.000000 |
| rad55                         | 5.38872e-09 | 1.000000 | 5.38875e-09 | 1.000000 |
| rad51                         | 4.79317e-09 | 1.000000 | 4.79319e-09 | 1.000000 |
| rad62                         | 3.44702e-09 | 1.000000 | 3.44705e-09 | 1.000000 |
| rad34                         | 2.68109e-09 | 1.000000 | 2.68110e-09 | 1.000000 |
| rad52                         | 2.25891e-09 | 1.000000 | 2.25893e-09 | 1.000000 |
| rad58                         | 2.20792e-09 | 1.000000 | 2.20793e-09 | 1.000000 |
| rad61                         | 1.06535e-09 | 1.000000 | 1.06536e-09 | 1.000000 |
| rad41                         | 6.91833e-10 | 1.000000 | 6.91836e-10 | 1.000000 |
| rad53                         | 4.13076e-10 | 1.000000 | 4.13078e-10 | 1.000000 |
| rad12                         | 4.04918e-10 | 1.000000 | 4.04919e-10 | 1.000000 |
| rad56                         | 2.12772e-10 | 1.000000 | 2.12773e-10 | 1.000000 |
| rad64                         | 1.55011e-10 | 1.000000 | 1.55012e-10 | 1.000000 |
| rad65                         | 1.50936e-10 | 1.000000 | 1.50936e-10 | 1.000000 |
| rad15                         | 1.16993e-10 | 1.000000 | 1.16993e-10 | 1.000000 |
| rad42                         | 1.03424e-10 | 1.000000 | 1.03424e-10 | 1.000000 |
| rad23                         | 9.58853e-11 | 1.000000 | 9.58861e-11 | 1.000000 |
| PAH8+H                        | 5.98046e-11 | 1.000000 | 5.98049e-11 | 1.000000 |
| rad6                          | 5.30800e-11 | 1.000000 | 5.30803e-11 | 1.000000 |
| rad19anti                     | 4.57518e-11 | 1.000000 | 4.57520e-11 | 1.000000 |
| rad68syn                      | 4.08577e-11 | 1.000000 | 4.08578e-11 | 1.000000 |
| rad2                          | 2.96307e-11 | 1.000000 | 2.96308e-11 | 1.000000 |
| rad68anti                     | 2.71887e-11 | 1.000000 | 2.71889e-11 | 1.000000 |
| rad45                         | 2.03794e-11 | 1.000000 | 2.03795e-11 | 1.000000 |
| rad40syn                      | 1.57820e-11 | 1.000000 | 1.57821e-11 | 1.000000 |
| rad40anti                     | 1.18024e-11 | 1.000000 | 1.18025e-11 | 1.000000 |
| rad73                         | 1.06689e-11 | 1.000000 | 1.06689e-11 | 1.000000 |
| rad1                          | 8.11737e-12 | 1.000000 | 8.11741e-12 | 1.000000 |
| rad71                         | 7.43353e-12 | 1.000000 | 7.43357e-12 | 1.000000 |
| rad36                         | 2.18887e-12 | 1.000000 | 2.18888e-12 | 1.000000 |
| rad19syn                      | 1.51735e-12 | 1.000000 | 1.51736e-12 | 1.000000 |
| rad10                         | 7.89155e-13 | 1.000000 | 7.89159e-13 | 1.000000 |
| rad26                         | 3.15422e-13 | 1.000000 | 3.15423e-13 | 1.000000 |
| rad3                          | 3.02868e-13 | 1.000000 | 3.02870e-13 | 1.000000 |
| rad4                          | 2.45544e-13 | 1.000000 | 2.45545e-13 | 1.000000 |
| rad72                         | 5.99677e-14 | 1.000000 | 5.99680e-14 | 1.000000 |
| rad22                         | 3.16955e-14 | 1.000000 | 3.16957e-14 | 1.000000 |

|       |             |          |             |          |
|-------|-------------|----------|-------------|----------|
| rad28 | 2.70164e-14 | 1.000000 | 2.70164e-14 | 1.000000 |
| rad7  | 1.36360e-14 | 1.000000 | 1.36361e-14 | 1.000000 |
| rad21 | 1.24820e-14 | 1.000000 | 1.24820e-14 | 1.000000 |
| rad24 | 8.13308e-15 | 1.000000 | 8.13312e-15 | 1.000000 |
| rad11 | 5.97372e-15 | 1.000000 | 5.97375e-15 | 1.000000 |
| rad20 | 2.46597e-15 | 1.000000 | 2.46599e-15 | 1.000000 |
| rad31 | 1.88481e-15 | 1.000000 | 1.88482e-15 | 1.000000 |
| rad33 | 1.65059e-15 | 1.000000 | 1.65060e-15 | 1.000000 |
| rad13 | 8.60146e-16 | 1.000000 | 8.60151e-16 | 1.000000 |
| rad8  | 5.47520e-16 | 1.000000 | 5.47523e-16 | 1.000000 |
| rad27 | 5.51493e-17 | 1.000000 | 5.51496e-17 | 1.000000 |
| rad25 | 2.50150e-17 | 1.000000 | 2.50151e-17 | 1.000000 |
| rad14 | 1.71222e-17 | 1.000000 | 1.71224e-17 | 1.000000 |
| rad47 | 4.19953e-18 | 1.000000 | 4.19956e-18 | 1.000000 |
| rad18 | 2.16334e-18 | 1.000000 | 2.16336e-18 | 1.000000 |
| rad5  | 4.23321e-23 | 1.000000 | 4.23322e-23 | 1.000000 |

0.100000000 Pa, 1000.00000 K

```

=====
Rate constant          | True (fraction)          Effective (fraction)
-----
Total                  | 2.07591e-12 (1.00 )    2.07587e-12 (1.00 )
Formation of rad19    | 1.74189e-12 (0.839 )   1.74186e-12 (0.839 )
H-abstraction to cyc2enyl | 2.68753e-13 (0.129 )   2.68753e-13 (0.129 )
H-abstraction to cyclenyl | 6.52627e-14 (0.0314 )  6.52614e-14 (0.0314 )
=====
species                | PYtrue          Cumul          PYeffective  Cumul
-----
Indene+H               | 0.799580        0.799580        0.799594    0.799594
Benzene+cycloprop-2-enylidene | 0.129463        0.929043        0.129465    0.929059
PhHCCH2+H              | 0.0345747       0.963618        0.0345753   0.963634
Benzene+cycloprop-1-enylidene | 0.0314382       0.995056        0.0314381   0.995072
C2H2+PhCH2             | 0.00107019      0.996126        0.00107021  0.996143
Ph+MeAc                | 0.00105363      0.997180        0.00105365  0.997196
Ph+Allene              | 0.000856200     0.998036        0.000856214 0.998052
PhCCCH3+H              | 0.000518414     0.998554        0.000518423 0.998571
PhCH2CCH+H             | 0.000387386     0.998942        0.000387392 0.998958
PhCCH+CH3              | 0.000373429     0.999315        0.000373436 0.999332
rad67                   | 0.000352183     0.999667        0.000352189 0.999684
rad35                   | 0.000127517     0.999795        0.000127519 0.999811
PhcycC3H3_A+H          | 6.68835e-05     0.999862        6.68846e-05 0.999878
PhcycC3H3_B+H          | 3.94339e-05     0.999901        3.94345e-05 0.999918
PAH7+H                  | 3.02087e-05     0.999931        3.02092e-05 0.999948
rad37                   | 2.12586e-05     0.999952        2.12589e-05 0.999969
Phenyl+cycC3H4         | 1.68078e-05     0.999969        0.000000    0.999969
PAH10+CH3              | 1.12489e-05     0.999980        1.12491e-05 0.999980
rad39                   | 5.81052e-06     0.999986        5.81062e-06 0.999986
rad30                   | 4.04453e-06     0.999990        4.04460e-06 0.999990
PAH9+H                  | 3.29480e-06     0.999994        3.29486e-06 0.999994
rad38                   | 3.08355e-06     0.999997        3.08360e-06 0.999997
PAH3+H                  | 1.54153e-06     0.999998        1.54155e-06 0.999998
rad9                    | 6.16176e-07     0.999999        6.16186e-07 0.999999
rad46                   | 3.42433e-07     0.999999        3.42439e-07 0.999999
rad54                   | 2.28563e-07     0.999999        2.28567e-07 0.999999
rad60syn                | 2.23227e-07     1.000000        2.23231e-07 1.000000
rad59                   | 1.76146e-07     1.000000        1.76149e-07 1.000000
rad60anti               | 1.33554e-07     1.000000        1.33556e-07 1.000000
rad50                   | 1.26030e-07     1.000000        1.26032e-07 1.000000
PAH1+H                  | 1.15229e-07     1.000000        1.15231e-07 1.000000
rad43                   | 6.60073e-08     1.000000        6.60085e-08 1.000000
rad70                   | 4.32336e-08     1.000000        4.32344e-08 1.000000
rad51                   | 1.82689e-08     1.000000        1.82691e-08 1.000000
rad55                   | 1.31170e-08     1.000000        1.31172e-08 1.000000
rad52                   | 7.81115e-09     1.000000        7.81129e-09 1.000000
rad34                   | 7.69756e-09     1.000000        7.69770e-09 1.000000
rad58                   | 7.07596e-09     1.000000        7.07608e-09 1.000000
rad62                   | 7.04061e-09     1.000000        7.04073e-09 1.000000
rad61                   | 4.13073e-09     1.000000        4.13081e-09 1.000000
rad41                   | 2.02609e-09     1.000000        2.02612e-09 1.000000
rad53                   | 1.31532e-09     1.000000        1.31534e-09 1.000000
rad56                   | 7.89507e-10     1.000000        7.89520e-10 1.000000
rad12                   | 7.28015e-10     1.000000        7.28028e-10 1.000000
rad65                   | 5.66893e-10     1.000000        5.66904e-10 1.000000
rad64                   | 4.72239e-10     1.000000        4.72247e-10 1.000000
PAH8+H                  | 3.12117e-10     1.000000        3.12123e-10 1.000000
rad42                   | 2.59327e-10     1.000000        2.59331e-10 1.000000
rad15                   | 1.66650e-10     1.000000        1.66653e-10 1.000000
rad68syn                | 1.64679e-10     1.000000        1.64681e-10 1.000000
rad68anti               | 1.09080e-10     1.000000        1.09082e-10 1.000000
rad23                   | 9.25828e-11     1.000000        9.25842e-11 1.000000

```

|           |             |         |             |         |
|-----------|-------------|---------|-------------|---------|
| rad40syn  | 7.34180e-11 | 1.00000 | 7.34193e-11 | 1.00000 |
| rad73     | 6.83282e-11 | 1.00000 | 6.83295e-11 | 1.00000 |
| rad40anti | 5.55035e-11 | 1.00000 | 5.55045e-11 | 1.00000 |
| rad71     | 5.43184e-11 | 1.00000 | 5.43193e-11 | 1.00000 |
| rad19anti | 3.42058e-11 | 1.00000 | 3.42064e-11 | 1.00000 |
| rad6      | 3.25262e-11 | 1.00000 | 3.25267e-11 | 1.00000 |
| rad2      | 2.29193e-11 | 1.00000 | 2.29197e-11 | 1.00000 |
| rad45     | 2.26525e-11 | 1.00000 | 2.26529e-11 | 1.00000 |
| rad1      | 6.49560e-12 | 1.00000 | 6.49571e-12 | 1.00000 |
| rad36     | 2.34950e-12 | 1.00000 | 2.34955e-12 | 1.00000 |
| rad19syn  | 1.42443e-12 | 1.00000 | 1.42446e-12 | 1.00000 |
| rad10     | 7.72954e-13 | 1.00000 | 7.72968e-13 | 1.00000 |
| rad72     | 5.29453e-13 | 1.00000 | 5.29462e-13 | 1.00000 |
| rad3      | 2.22519e-13 | 1.00000 | 2.22523e-13 | 1.00000 |
| rad26     | 2.14485e-13 | 1.00000 | 2.14489e-13 | 1.00000 |
| rad21     | 2.12002e-13 | 1.00000 | 2.12006e-13 | 1.00000 |
| rad4      | 1.81527e-13 | 1.00000 | 1.81530e-13 | 1.00000 |
| rad8      | 6.27864e-14 | 1.00000 | 6.27875e-14 | 1.00000 |
| rad20     | 5.00205e-14 | 1.00000 | 5.00214e-14 | 1.00000 |
| rad22     | 3.72724e-14 | 1.00000 | 3.72731e-14 | 1.00000 |
| rad24     | 3.61531e-14 | 1.00000 | 3.61537e-14 | 1.00000 |
| rad33     | 2.31560e-14 | 1.00000 | 2.31564e-14 | 1.00000 |
| rad13     | 2.29877e-14 | 1.00000 | 2.29881e-14 | 1.00000 |
| rad28     | 1.76943e-14 | 1.00000 | 1.76946e-14 | 1.00000 |
| rad7      | 1.37177e-14 | 1.00000 | 1.37179e-14 | 1.00000 |
| rad11     | 8.70917e-15 | 1.00000 | 8.70932e-15 | 1.00000 |
| rad31     | 2.18573e-15 | 1.00000 | 2.18577e-15 | 1.00000 |
| rad25     | 7.70813e-16 | 1.00000 | 7.70826e-16 | 1.00000 |
| rad27     | 5.93420e-16 | 1.00000 | 5.93430e-16 | 1.00000 |
| rad14     | 5.45517e-17 | 1.00000 | 5.45526e-17 | 1.00000 |
| rad18     | 4.65075e-17 | 1.00000 | 4.65084e-17 | 1.00000 |
| rad47     | 1.63640e-17 | 1.00000 | 1.63643e-17 | 1.00000 |
| rad5      | 1.30920e-22 | 1.00000 | 1.30922e-22 | 1.00000 |

0.100000000 Pa, 1100.00000 K

=====

| Rate constant             | True (fraction)       | Effective (fraction)  |
|---------------------------|-----------------------|-----------------------|
| Total                     | 2.81236e-12 (1.00 )   | 2.81222e-12 (1.00 )   |
| Formation of rad19        | 2.25993e-12 (0.804 )  | 2.25980e-12 (0.804 )  |
| H-abstraction to cyc2enyl | 4.30538e-13 (0.153 )  | 4.30538e-13 (0.153 )  |
| H-abstraction to cyclenyl | 1.21896e-13 (0.0433 ) | 1.21889e-13 (0.0433 ) |

| species                       | PYtrue      | Cumul    | PYeffective | Cumul    |
|-------------------------------|-------------|----------|-------------|----------|
| Indene+H                      | 0.745453    | 0.745453 | 0.745490    | 0.745490 |
| Benzene+cycloprop-2-enylidene | 0.153088    | 0.898541 | 0.153095    | 0.898585 |
| PhCHCCH2+H                    | 0.0504102   | 0.948951 | 0.0504127   | 0.948998 |
| Benzene+cycloprop-1-enylidene | 0.0433429   | 0.992294 | 0.0433425   | 0.992340 |
| Ph+MeAc                       | 0.00159995  | 0.993894 | 0.00160004  | 0.993940 |
| C2H2+PhCH2                    | 0.00157399  | 0.995468 | 0.00157407  | 0.995514 |
| Ph+Allene                     | 0.00139383  | 0.996861 | 0.00139391  | 0.996908 |
| PhCCCH3+H                     | 0.000746167 | 0.997608 | 0.000746205 | 0.997654 |
| PhCH2CCH+H                    | 0.000685351 | 0.998293 | 0.000685386 | 0.998340 |
| rad67                         | 0.000551535 | 0.998844 | 0.000551562 | 0.998891 |
| PhCCH+CH3                     | 0.000499942 | 0.999344 | 0.000499967 | 0.999391 |
| rad35                         | 0.000198913 | 0.999543 | 0.000198923 | 0.999590 |
| PhcycC3H3_A+H                 | 0.000160991 | 0.999704 | 0.000160998 | 0.999751 |
| PhcycC3H3_B+H                 | 0.000108575 | 0.999813 | 0.000108581 | 0.999860 |
| Phenyl+cycC3H4                | 4.74535e-05 | 0.999860 | 0.000000    | 0.999860 |
| PAH7+H                        | 4.44321e-05 | 0.999905 | 4.44343e-05 | 0.999904 |
| rad37                         | 3.57994e-05 | 0.999941 | 3.58012e-05 | 0.999940 |
| PAH10+CH3                     | 2.47783e-05 | 0.999965 | 2.47795e-05 | 0.999965 |
| rad39                         | 8.15527e-06 | 0.999973 | 8.15567e-06 | 0.999973 |
| rad30                         | 6.70546e-06 | 0.999980 | 6.70579e-06 | 0.999980 |
| PAH9+H                        | 6.62790e-06 | 0.999987 | 6.62823e-06 | 0.999986 |
| rad38                         | 6.20734e-06 | 0.999993 | 6.20765e-06 | 0.999992 |
| PAH3+H                        | 3.45074e-06 | 0.999996 | 3.45092e-06 | 0.999996 |
| rad46                         | 7.53235e-07 | 0.999997 | 7.53273e-07 | 0.999997 |
| rad9                          | 4.84053e-07 | 0.999998 | 4.84077e-07 | 0.999997 |
| rad54                         | 4.48882e-07 | 0.999998 | 4.48904e-07 | 0.999998 |
| rad60syn                      | 4.32745e-07 | 0.999999 | 4.32766e-07 | 0.999998 |
| rad59                         | 3.79638e-07 | 0.999999 | 3.79657e-07 | 0.999998 |
| rad50                         | 3.42568e-07 | 0.999999 | 3.42585e-07 | 0.999999 |
| PAH1+H                        | 2.85200e-07 | 1.000000 | 2.85214e-07 | 0.999999 |
| rad60anti                     | 2.61612e-07 | 1.000000 | 2.61625e-07 | 0.999999 |
| rad43                         | 1.34217e-07 | 1.000000 | 1.34224e-07 | 0.999999 |
| rad70                         | 9.71523e-08 | 1.000000 | 9.71571e-08 | 0.999999 |
| rad51                         | 5.84204e-08 | 1.000000 | 5.84233e-08 | 1.000000 |
| rad55                         | 2.73159e-08 | 1.000000 | 2.73173e-08 | 1.000000 |

|           |             |         |             |          |
|-----------|-------------|---------|-------------|----------|
| rad52     | 2.30042e-08 | 1.00000 | 2.30053e-08 | 1.000000 |
| rad58     | 1.92129e-08 | 1.00000 | 1.92138e-08 | 1.000000 |
| rad34     | 1.87508e-08 | 1.00000 | 1.87518e-08 | 1.000000 |
| rad61     | 1.28479e-08 | 1.00000 | 1.28486e-08 | 1.000000 |
| rad62     | 1.28165e-08 | 1.00000 | 1.28172e-08 | 1.000000 |
| rad41     | 5.04986e-09 | 1.00000 | 5.05011e-09 | 1.000000 |
| rad53     | 3.43769e-09 | 1.00000 | 3.43786e-09 | 1.000000 |
| rad56     | 2.34084e-09 | 1.00000 | 2.34095e-09 | 1.000000 |
| rad65     | 1.78591e-09 | 1.00000 | 1.78600e-09 | 1.000000 |
| PAH8+H    | 1.25262e-09 | 1.00000 | 1.25268e-09 | 1.000000 |
| rad64     | 1.19352e-09 | 1.00000 | 1.19358e-09 | 1.000000 |
| rad12     | 7.93861e-10 | 1.00000 | 7.93900e-10 | 1.000000 |
| rad42     | 5.61885e-10 | 1.00000 | 5.61913e-10 | 1.000000 |
| rad68syn  | 5.32282e-10 | 1.00000 | 5.32308e-10 | 1.000000 |
| rad68anti | 3.51217e-10 | 1.00000 | 3.51235e-10 | 1.000000 |
| rad73     | 3.35028e-10 | 1.00000 | 3.35044e-10 | 1.000000 |
| rad71     | 2.99164e-10 | 1.00000 | 2.99179e-10 | 1.000000 |
| rad40syn  | 2.68076e-10 | 1.00000 | 2.68089e-10 | 1.000000 |
| rad40anti | 2.04790e-10 | 1.00000 | 2.04800e-10 | 1.000000 |
| rad15     | 1.78086e-10 | 1.00000 | 1.78095e-10 | 1.000000 |
| rad23     | 8.62126e-11 | 1.00000 | 8.62174e-11 | 1.000000 |
| rad19anti | 2.56282e-11 | 1.00000 | 2.56295e-11 | 1.000000 |
| rad45     | 2.31495e-11 | 1.00000 | 2.31506e-11 | 1.000000 |
| rad6      | 2.19413e-11 | 1.00000 | 2.19424e-11 | 1.000000 |
| rad2      | 1.75676e-11 | 1.00000 | 1.75685e-11 | 1.000000 |
| rad1      | 4.99399e-12 | 1.00000 | 4.99424e-12 | 1.000000 |
| rad72     | 3.67155e-12 | 1.00000 | 3.67173e-12 | 1.000000 |
| rad36     | 2.36546e-12 | 1.00000 | 2.36557e-12 | 1.000000 |
| rad19syn  | 1.28391e-12 | 1.00000 | 1.28398e-12 | 1.000000 |
| rad21     | 9.64765e-13 | 1.00000 | 9.64821e-13 | 1.000000 |
| rad10     | 7.99968e-13 | 1.00000 | 8.00008e-13 | 1.000000 |
| rad8      | 7.65180e-13 | 1.00000 | 7.65219e-13 | 1.000000 |
| rad13     | 3.17370e-13 | 1.00000 | 3.17385e-13 | 1.000000 |
| rad20     | 2.50454e-13 | 1.00000 | 2.50467e-13 | 1.000000 |
| rad3      | 1.59847e-13 | 1.00000 | 1.59854e-13 | 1.000000 |
| rad26     | 1.59329e-13 | 1.00000 | 1.59338e-13 | 1.000000 |
| rad4      | 1.30168e-13 | 1.00000 | 1.30174e-13 | 1.000000 |
| rad33     | 8.69165e-14 | 1.00000 | 8.69205e-14 | 1.000000 |
| rad24     | 7.72338e-14 | 1.00000 | 7.72377e-14 | 1.000000 |
| rad11     | 7.70101e-14 | 1.00000 | 7.70140e-14 | 1.000000 |
| rad22     | 5.25133e-14 | 1.00000 | 5.25159e-14 | 1.000000 |
| rad7      | 1.87727e-14 | 1.00000 | 1.87737e-14 | 1.000000 |
| rad28     | 1.26556e-14 | 1.00000 | 1.26562e-14 | 1.000000 |
| rad25     | 7.88798e-15 | 1.00000 | 7.88838e-15 | 1.000000 |
| rad27     | 4.76096e-15 | 1.00000 | 4.76119e-15 | 1.000000 |
| rad31     | 2.41069e-15 | 1.00000 | 2.41081e-15 | 1.000000 |
| rad18     | 7.57144e-16 | 1.00000 | 7.57181e-16 | 1.000000 |
| rad14     | 3.89085e-16 | 1.00000 | 3.89104e-16 | 1.000000 |
| rad47     | 5.25051e-17 | 1.00000 | 5.25078e-17 | 1.000000 |
| rad5      | 1.11746e-21 | 1.00000 | 1.11751e-21 | 1.000000 |

0.10000000 Pa, 1200.00000 K

| Rate constant             | True (fraction)       | Effective (fraction)  |
|---------------------------|-----------------------|-----------------------|
| Total                     | 3.72623e-12 (1.00 )   | 3.72576e-12 (1.00 )   |
| Formation of rad19        | 2.86288e-12 (0.768 )  | 2.86245e-12 (0.768 )  |
| H-abstraction to cyc2enyl | 6.53266e-13 (0.175 )  | 6.53266e-13 (0.175 )  |
| H-abstraction to cyc1enyl | 2.10085e-13 (0.0564 ) | 2.10053e-13 (0.0564 ) |

| species                       | PYtrue      | Cumul    | PYeffective | Cumul    |
|-------------------------------|-------------|----------|-------------|----------|
| Indene+H                      | 0.687504    | 0.687504 | 0.687591    | 0.687591 |
| Benzene+cycloprop-2-enylidene | 0.175315    | 0.862820 | 0.175337    | 0.862929 |
| PhCHCCH2+H                    | 0.0694480   | 0.932268 | 0.0694568   | 0.932385 |
| Benzene+cycloprop-1-enylidene | 0.0563801   | 0.988648 | 0.0563786   | 0.988764 |
| Ph+MeAc                       | 0.00227276  | 0.990920 | 0.00227305  | 0.991037 |
| C2H2+PhCH2                    | 0.00219124  | 0.993112 | 0.00219152  | 0.993228 |
| Ph+Allene                     | 0.00207998  | 0.995192 | 0.00208024  | 0.995309 |
| PhCH2CCH+H                    | 0.00110695  | 0.996299 | 0.00110709  | 0.996416 |
| PhCCCH3+H                     | 0.00101201  | 0.997311 | 0.00101214  | 0.997428 |
| rad67                         | 0.000806320 | 0.998117 | 0.000806422 | 0.998234 |
| PhCCH+CH3                     | 0.000645726 | 0.998763 | 0.000645807 | 0.998880 |
| PhcycC3H3_A+H                 | 0.000345602 | 0.999108 | 0.000345645 | 0.999226 |
| rad35                         | 0.000290176 | 0.999398 | 0.000290212 | 0.999516 |
| PhcycC3H3_B+H                 | 0.000261277 | 0.999660 | 0.000261310 | 0.999777 |
| Phenyl+cycC3H4                | 0.000117514 | 0.999777 | 0.00000     | 0.999777 |
| PAH7+H                        | 6.09160e-05 | 0.999838 | 6.09237e-05 | 0.999838 |
| rad37                         | 5.51004e-05 | 0.999893 | 5.51074e-05 | 0.999893 |
| PAH10+CH3                     | 4.81052e-05 | 0.999941 | 4.81113e-05 | 0.999941 |

|           |             |          |             |          |
|-----------|-------------|----------|-------------|----------|
| PAH9+H    | 1.22293e-05 | 0.999954 | 1.22309e-05 | 0.999954 |
| rad38     | 1.12964e-05 | 0.999965 | 1.12978e-05 | 0.999965 |
| rad39     | 1.06984e-05 | 0.999976 | 1.06997e-05 | 0.999976 |
| rad30     | 1.03393e-05 | 0.999986 | 1.03406e-05 | 0.999986 |
| PAH3+H    | 6.91442e-06 | 0.999993 | 6.91529e-06 | 0.999993 |
| rad46     | 1.50191e-06 | 0.999994 | 1.50210e-06 | 0.999994 |
| rad50     | 8.20811e-07 | 0.999995 | 8.20919e-07 | 0.999995 |
| rad54     | 7.81527e-07 | 0.999996 | 7.81622e-07 | 0.999996 |
| rad60syn  | 7.65142e-07 | 0.999997 | 7.65239e-07 | 0.999997 |
| rad59     | 7.35076e-07 | 0.999997 | 7.35168e-07 | 0.999998 |
| PAH1+H    | 6.15327e-07 | 0.999998 | 6.15404e-07 | 0.999998 |
| rad60anti | 4.66736e-07 | 0.999999 | 4.66795e-07 | 0.999999 |
| rad9      | 3.32473e-07 | 0.999999 | 3.32515e-07 | 0.999999 |
| rad43     | 2.45564e-07 | 0.999999 | 2.45595e-07 | 0.999999 |
| rad70     | 1.92619e-07 | 0.999999 | 1.92644e-07 | 0.999999 |
| rad51     | 1.60778e-07 | 0.999999 | 1.60798e-07 | 1.000000 |
| rad52     | 5.89668e-08 | 1.000000 | 5.89743e-08 | 1.000000 |
| rad55     | 4.99997e-08 | 1.000000 | 5.00059e-08 | 1.000000 |
| rad58     | 4.53410e-08 | 1.000000 | 4.53467e-08 | 1.000000 |
| rad34     | 3.98696e-08 | 1.000000 | 3.98747e-08 | 1.000000 |
| rad61     | 3.33646e-08 | 1.000000 | 3.33689e-08 | 1.000000 |
| rad62     | 2.11975e-08 | 1.000000 | 2.12002e-08 | 1.000000 |
| rad41     | 1.09930e-08 | 1.000000 | 1.09944e-08 | 1.000000 |
| rad53     | 7.65136e-09 | 1.000000 | 7.65232e-09 | 1.000000 |
| rad56     | 5.79489e-09 | 1.000000 | 5.79562e-09 | 1.000000 |
| rad65     | 4.84273e-09 | 1.000000 | 4.84335e-09 | 1.000000 |
| PAH8+H    | 4.08382e-09 | 1.000000 | 4.08434e-09 | 1.000000 |
| rad64     | 2.60024e-09 | 1.000000 | 2.60057e-09 | 1.000000 |
| rad68syn  | 1.44004e-09 | 1.000000 | 1.44022e-09 | 1.000000 |
| rad73     | 1.33000e-09 | 1.000000 | 1.33017e-09 | 1.000000 |
| rad71     | 1.32317e-09 | 1.000000 | 1.32334e-09 | 1.000000 |
| rad42     | 1.07993e-09 | 1.000000 | 1.08007e-09 | 1.000000 |
| rad68anti | 9.47051e-10 | 1.000000 | 9.47171e-10 | 1.000000 |
| rad40syn  | 8.06282e-10 | 1.000000 | 8.06383e-10 | 1.000000 |
| rad12     | 7.13659e-10 | 1.000000 | 7.13749e-10 | 1.000000 |
| rad40anti | 6.22027e-10 | 1.000000 | 6.22105e-10 | 1.000000 |
| rad15     | 1.77330e-10 | 1.000000 | 1.77352e-10 | 1.000000 |
| rad23     | 7.92867e-11 | 1.000000 | 7.92969e-11 | 1.000000 |
| rad45     | 2.25179e-11 | 1.000000 | 2.25206e-11 | 1.000000 |
| rad72     | 2.09462e-11 | 1.000000 | 2.09489e-11 | 1.000000 |
| rad19anti | 1.93816e-11 | 1.000000 | 1.93840e-11 | 1.000000 |
| rad6      | 1.88831e-11 | 1.000000 | 1.88854e-11 | 1.000000 |
| rad2      | 1.32281e-11 | 1.000000 | 1.32298e-11 | 1.000000 |
| rad1      | 3.76605e-12 | 1.000000 | 3.76653e-12 | 1.000000 |
| rad8      | 2.53559e-12 | 1.000000 | 2.53591e-12 | 1.000000 |
| rad36     | 2.29550e-12 | 1.000000 | 2.29579e-12 | 1.000000 |
| rad21     | 2.06405e-12 | 1.000000 | 2.06432e-12 | 1.000000 |
| rad13     | 1.26481e-12 | 1.000000 | 1.26496e-12 | 1.000000 |
| rad19syn  | 1.13955e-12 | 1.000000 | 1.13970e-12 | 1.000000 |
| rad11     | 1.11050e-12 | 1.000000 | 1.11064e-12 | 1.000000 |
| rad10     | 8.35047e-13 | 1.000000 | 8.35156e-13 | 1.000000 |
| rad20     | 5.32589e-13 | 1.000000 | 5.32656e-13 | 1.000000 |
| rad33     | 1.49707e-13 | 1.000000 | 1.49726e-13 | 1.000000 |
| rad26     | 1.27863e-13 | 1.000000 | 1.27879e-13 | 1.000000 |
| rad24     | 1.18502e-13 | 1.000000 | 1.18517e-13 | 1.000000 |
| rad3      | 1.13202e-13 | 1.000000 | 1.13217e-13 | 1.000000 |
| rad7      | 1.04361e-13 | 1.000000 | 1.04374e-13 | 1.000000 |
| rad4      | 9.18662e-14 | 1.000000 | 9.18776e-14 | 1.000000 |
| rad22     | 7.77655e-14 | 1.000000 | 7.77749e-14 | 1.000000 |
| rad25     | 2.92751e-14 | 1.000000 | 2.92788e-14 | 1.000000 |
| rad18     | 1.77824e-14 | 1.000000 | 1.77846e-14 | 1.000000 |
| rad27     | 1.52639e-14 | 1.000000 | 1.52659e-14 | 1.000000 |
| rad28     | 1.05892e-14 | 1.000000 | 1.05905e-14 | 1.000000 |
| rad31     | 2.55730e-15 | 1.000000 | 2.55763e-15 | 1.000000 |
| rad14     | 1.34545e-15 | 1.000000 | 1.34562e-15 | 1.000000 |
| rad47     | 1.43439e-16 | 1.000000 | 1.43458e-16 | 1.000000 |
| rad5      | 2.37481e-20 | 1.000000 | 2.37511e-20 | 1.000000 |

0.100000000 Pa, 1300.00000 K

| Rate constant             | True (fraction)       | Effective (fraction)  |
|---------------------------|-----------------------|-----------------------|
| Total                     | 4.84401e-12 (1.00 )   | 4.84262e-12 (1.00 )   |
| Formation of rad19        | 3.55537e-12 (0.734 )  | 3.55411e-12 (0.734 )  |
| H-abstraction to cyc2enyl | 9.48893e-13 (0.196 )  | 9.48893e-13 (0.196 )  |
| H-abstraction to cyclenyl | 3.39740e-13 (0.0701 ) | 3.39620e-13 (0.0701 ) |

  

| species  | PYtrue   | Cumul    | PYeffective | Cumul    |
|----------|----------|----------|-------------|----------|
| Indene+H | 0.627160 | 0.627160 | 0.627339    | 0.627339 |

|                               |             |          |             |          |
|-------------------------------|-------------|----------|-------------|----------|
| Benzene+cycloprop-2-enylidene | 0.195890    | 0.823050 | 0.195946    | 0.823285 |
| PhCHCCH2+H                    | 0.0908784   | 0.913928 | 0.0909044   | 0.914190 |
| Benzene+cycloprop-1-enylidene | 0.0701362   | 0.984065 | 0.0701313   | 0.984321 |
| Ph+MeAc                       | 0.00304443  | 0.987109 | 0.00304529  | 0.987367 |
| C2H2+PhCH2                    | 0.00290374  | 0.990013 | 0.00290456  | 0.990271 |
| Ph+Allene                     | 0.00288472  | 0.992898 | 0.00288555  | 0.993157 |
| PhCH2CCH+H                    | 0.00165449  | 0.994552 | 0.00165497  | 0.994812 |
| PhCCCH3+H                     | 0.00130153  | 0.995854 | 0.00130191  | 0.996113 |
| rad67                         | 0.00110884  | 0.996962 | 0.00110916  | 0.997223 |
| PhCCH+CH3                     | 0.000809522 | 0.997772 | 0.000809751 | 0.998032 |
| PhcycC3H3_A+H                 | 0.000673394 | 0.998445 | 0.000673586 | 0.998706 |
| PhcycC3H3_B+H                 | 0.000561396 | 0.999007 | 0.000561556 | 0.999268 |
| rad35                         | 0.000398728 | 0.999405 | 0.000398841 | 0.999666 |
| Phenyl+cycC3H4                | 0.000260506 | 0.999666 | 0.000000    | 0.999666 |
| PAH10+CH3                     | 8.38029e-05 | 0.999750 | 8.38264e-05 | 0.999750 |
| PAH7+H                        | 7.89124e-05 | 0.999829 | 7.89348e-05 | 0.999829 |
| rad37                         | 7.83568e-05 | 0.999907 | 7.83793e-05 | 0.999908 |
| PAH9+H                        | 2.08516e-05 | 0.999928 | 2.08576e-05 | 0.999928 |
| rad38                         | 1.88171e-05 | 0.999947 | 1.88225e-05 | 0.999947 |
| rad30                         | 1.49361e-05 | 0.999962 | 1.49404e-05 | 0.999962 |
| rad39                         | 1.33375e-05 | 0.999975 | 1.33413e-05 | 0.999975 |
| PAH3+H                        | 1.25736e-05 | 0.999988 | 1.25772e-05 | 0.999988 |
| rad46                         | 2.73974e-06 | 0.999990 | 2.74053e-06 | 0.999991 |
| rad50                         | 1.75707e-06 | 0.999992 | 1.75757e-06 | 0.999993 |
| rad59                         | 1.29587e-06 | 0.999993 | 1.29624e-06 | 0.999994 |
| rad60syn                      | 1.24695e-06 | 0.999995 | 1.24730e-06 | 0.999995 |
| rad54                         | 1.23057e-06 | 0.999996 | 1.23092e-06 | 0.999996 |
| PAH1+H                        | 1.18168e-06 | 0.999997 | 1.18202e-06 | 0.999998 |
| rad60anti                     | 7.66621e-07 | 0.999998 | 7.66839e-07 | 0.999998 |
| rad43                         | 4.10015e-07 | 0.999998 | 4.10131e-07 | 0.999999 |
| rad51                         | 3.87444e-07 | 0.999999 | 3.87555e-07 | 0.999999 |
| rad70                         | 3.43687e-07 | 0.999999 | 3.43785e-07 | 0.999999 |
| rad9                          | 2.15676e-07 | 0.999999 | 2.15737e-07 | 1.000000 |
| rad52                         | 1.33638e-07 | 0.999999 | 1.33677e-07 | 1.000000 |
| rad58                         | 9.48485e-08 | 0.999999 | 9.48756e-08 | 1.000000 |
| rad55                         | 8.22153e-08 | 0.999999 | 8.22390e-08 | 1.000000 |
| rad34                         | 7.56264e-08 | 1.000000 | 7.56476e-08 | 1.000000 |
| rad61                         | 7.45130e-08 | 1.000000 | 7.45342e-08 | 1.000000 |
| rad62                         | 3.23569e-08 | 1.000000 | 3.23662e-08 | 1.000000 |
| rad41                         | 2.13220e-08 | 1.000000 | 2.13281e-08 | 1.000000 |
| rad53                         | 1.49193e-08 | 1.000000 | 1.49236e-08 | 1.000000 |
| rad56                         | 1.23752e-08 | 1.000000 | 1.23788e-08 | 1.000000 |
| rad65                         | 1.15047e-08 | 1.000000 | 1.15079e-08 | 1.000000 |
| PAH8+H                        | 1.11847e-08 | 1.000000 | 1.11878e-08 | 1.000000 |
| rad64                         | 5.02571e-09 | 1.000000 | 5.02714e-09 | 1.000000 |
| rad71                         | 4.76419e-09 | 1.000000 | 4.76555e-09 | 1.000000 |
| rad73                         | 4.36629e-09 | 1.000000 | 4.36754e-09 | 1.000000 |
| rad68syn                      | 3.35971e-09 | 1.000000 | 3.36066e-09 | 1.000000 |
| rad68anti                     | 2.20327e-09 | 1.000000 | 2.20390e-09 | 1.000000 |
| rad40syn                      | 2.06153e-09 | 1.000000 | 2.06211e-09 | 1.000000 |
| rad42                         | 1.87923e-09 | 1.000000 | 1.87977e-09 | 1.000000 |
| rad40anti                     | 1.60461e-09 | 1.000000 | 1.60507e-09 | 1.000000 |
| rad12                         | 5.89884e-10 | 1.000000 | 5.90052e-10 | 1.000000 |
| rad15                         | 2.17652e-10 | 1.000000 | 2.17714e-10 | 1.000000 |
| rad72                         | 9.35200e-11 | 1.000000 | 9.35465e-11 | 1.000000 |
| rad23                         | 7.34671e-11 | 1.000000 | 7.34877e-11 | 1.000000 |
| rad6                          | 2.18827e-11 | 1.000000 | 2.18889e-11 | 1.000000 |
| rad45                         | 2.12394e-11 | 1.000000 | 2.12454e-11 | 1.000000 |
| rad19anti                     | 1.48397e-11 | 1.000000 | 1.48440e-11 | 1.000000 |
| rad2                          | 9.83613e-12 | 1.000000 | 9.83889e-12 | 1.000000 |
| rad11                         | 6.15601e-12 | 1.000000 | 6.15776e-12 | 1.000000 |
| rad8                          | 4.42267e-12 | 1.000000 | 4.42393e-12 | 1.000000 |
| rad21                         | 3.03646e-12 | 1.000000 | 3.03733e-12 | 1.000000 |
| rad1                          | 2.81823e-12 | 1.000000 | 2.81904e-12 | 1.000000 |
| rad13                         | 2.24819e-12 | 1.000000 | 2.24883e-12 | 1.000000 |
| rad36                         | 2.17325e-12 | 1.000000 | 2.17387e-12 | 1.000000 |
| rad10                         | 1.28067e-12 | 1.000000 | 1.28103e-12 | 1.000000 |
| rad19syn                      | 1.00706e-12 | 1.000000 | 1.00735e-12 | 1.000000 |
| rad7                          | 9.50929e-13 | 1.000000 | 9.51200e-13 | 1.000000 |
| rad20                         | 7.40073e-13 | 1.000000 | 7.40286e-13 | 1.000000 |
| rad33                         | 1.76739e-13 | 1.000000 | 1.76789e-13 | 1.000000 |
| rad18                         | 1.59167e-13 | 1.000000 | 1.59213e-13 | 1.000000 |
| rad24                         | 1.53475e-13 | 1.000000 | 1.53518e-13 | 1.000000 |
| rad26                         | 1.12659e-13 | 1.000000 | 1.12692e-13 | 1.000000 |
| rad22                         | 1.08163e-13 | 1.000000 | 1.08194e-13 | 1.000000 |
| rad3                          | 7.97213e-14 | 1.000000 | 7.97436e-14 | 1.000000 |
| rad4                          | 6.44052e-14 | 1.000000 | 6.44235e-14 | 1.000000 |
| rad25                         | 5.66965e-14 | 1.000000 | 5.67127e-14 | 1.000000 |
| rad27                         | 2.71071e-14 | 1.000000 | 2.71148e-14 | 1.000000 |
| rad28                         | 1.10379e-14 | 1.000000 | 1.10411e-14 | 1.000000 |

|       |             |          |             |          |
|-------|-------------|----------|-------------|----------|
| rad31 | 2.62745e-15 | 1.000000 | 2.62820e-15 | 1.000000 |
| rad14 | 2.42442e-15 | 1.000000 | 2.42511e-15 | 1.000000 |
| rad47 | 3.40987e-16 | 1.000000 | 3.41085e-16 | 1.000000 |
| rad5  | 7.39420e-19 | 1.000000 | 7.39633e-19 | 1.000000 |

0.100000000 Pa, 1400.00000 K

=====

| Rate constant             | True (fraction)       | Effective (fraction)  |
|---------------------------|-----------------------|-----------------------|
| Total                     | 6.19360e-12 (1.00 )   | 6.18997e-12 (1.00 )   |
| Formation of rad19        | 4.34185e-12 (0.701 )  | 4.33861e-12 (0.701 )  |
| H-abstraction to cyc2enyl | 1.32990e-12 (0.215 )  | 1.32990e-12 (0.215 )  |
| H-abstraction to cyclenyl | 5.21850e-13 (0.0843 ) | 5.21461e-13 (0.0842 ) |

| species                       | PYtrue      | Cumul    | PYeffective | Cumul    |
|-------------------------------|-------------|----------|-------------|----------|
| Indene+H                      | 0.566027    | 0.566027 | 0.566359    | 0.566359 |
| Benzene+cycloprop-2-enylidene | 0.214721    | 0.780748 | 0.214847    | 0.781206 |
| PhCHCCH2+H                    | 0.113527    | 0.894275 | 0.113594    | 0.894800 |
| Benzene+cycloprop-1-enylidene | 0.0842564   | 0.978532 | 0.0842429   | 0.979043 |
| Ph+MeAc                       | 0.00387285  | 0.982405 | 0.00387512  | 0.982918 |
| Ph+Allene                     | 0.00376037  | 0.986165 | 0.00376258  | 0.986680 |
| C2H2+PhCH2                    | 0.00367930  | 0.989844 | 0.00368146  | 0.990362 |
| PhCH2CCH+H                    | 0.00231298  | 0.992157 | 0.00231433  | 0.992676 |
| PhCCCH3+H                     | 0.00159641  | 0.993754 | 0.00159735  | 0.994274 |
| rad67                         | 0.00144410  | 0.995198 | 0.00144495  | 0.995719 |
| PhcycC3H3_A+H                 | 0.00120489  | 0.996403 | 0.00120559  | 0.996924 |
| PhcycC3H3_B+H                 | 0.00109183  | 0.997495 | 0.00109247  | 0.998017 |
| PhCCH+CH3                     | 0.000988687 | 0.998483 | 0.000989264 | 0.999006 |
| Phenyl+cycC3H4                | 0.000523345 | 0.999007 | 0.000000    | 0.999000 |
| rad35                         | 0.000519419 | 0.999526 | 0.000519724 | 0.999526 |
| PAH10+CH3                     | 0.000132942 | 0.999659 | 0.000133019 | 0.999659 |
| rad37                         | 0.000103969 | 0.999763 | 0.000104030 | 0.999763 |
| PAH7+H                        | 9.76629e-05 | 0.999861 | 9.77202e-05 | 0.999860 |
| PAH9+H                        | 3.30455e-05 | 0.999894 | 3.30649e-05 | 0.999893 |
| rad38                         | 2.89871e-05 | 0.999923 | 2.90041e-05 | 0.999922 |
| PAH3+H                        | 2.09775e-05 | 0.999944 | 2.09898e-05 | 0.999943 |
| rad30                         | 2.03485e-05 | 0.999964 | 2.03605e-05 | 0.999964 |
| rad39                         | 1.60326e-05 | 0.999980 | 1.60420e-05 | 0.999980 |
| rad46                         | 4.60495e-06 | 0.999985 | 4.60764e-06 | 0.999984 |
| rad50                         | 3.39263e-06 | 0.999988 | 3.39462e-06 | 0.999988 |
| rad59                         | 2.10239e-06 | 0.999990 | 2.10362e-06 | 0.999990 |
| PAH1+H                        | 2.05217e-06 | 0.999992 | 2.05337e-06 | 0.999992 |
| rad60syn                      | 1.88966e-06 | 0.999994 | 1.89077e-06 | 0.999994 |
| rad54                         | 1.78086e-06 | 0.999996 | 1.78191e-06 | 0.999996 |
| rad60anti                     | 1.16975e-06 | 0.999997 | 1.17043e-06 | 0.999997 |
| rad51                         | 8.27157e-07 | 0.999998 | 8.27641e-07 | 0.999998 |
| rad43                         | 6.31787e-07 | 0.999998 | 6.32158e-07 | 0.999998 |
| rad70                         | 5.60223e-07 | 0.999999 | 5.60551e-07 | 0.999999 |
| rad52                         | 2.70720e-07 | 0.999999 | 2.70879e-07 | 0.999999 |
| rad58                         | 1.78431e-07 | 0.999999 | 1.78535e-07 | 0.999999 |
| rad61                         | 1.46280e-07 | 1.000000 | 1.46366e-07 | 0.999999 |
| rad9                          | 1.36548e-07 | 1.000000 | 1.36628e-07 | 1.000000 |
| rad34                         | 1.30057e-07 | 1.000000 | 1.30134e-07 | 1.000000 |
| rad55                         | 1.23572e-07 | 1.000000 | 1.23645e-07 | 1.000000 |
| rad62                         | 4.61531e-08 | 1.000000 | 4.61802e-08 | 1.000000 |
| rad41                         | 3.74007e-08 | 1.000000 | 3.74226e-08 | 1.000000 |
| PAH8+H                        | 2.63157e-08 | 1.000000 | 2.63312e-08 | 1.000000 |
| rad53                         | 2.60387e-08 | 1.000000 | 2.60540e-08 | 1.000000 |
| rad65                         | 2.42346e-08 | 1.000000 | 2.42489e-08 | 1.000000 |
| rad56                         | 2.33526e-08 | 1.000000 | 2.33662e-08 | 1.000000 |
| rad71                         | 1.41534e-08 | 1.000000 | 1.41617e-08 | 1.000000 |
| rad73                         | 1.20330e-08 | 1.000000 | 1.20400e-08 | 1.000000 |
| rad64                         | 8.79769e-09 | 1.000000 | 8.80280e-09 | 1.000000 |
| rad68syn                      | 6.90112e-09 | 1.000000 | 6.90518e-09 | 1.000000 |
| rad40syn                      | 4.57758e-09 | 1.000000 | 4.58026e-09 | 1.000000 |
| rad68anti                     | 4.51475e-09 | 1.000000 | 4.51739e-09 | 1.000000 |
| rad40anti                     | 3.59056e-09 | 1.000000 | 3.59266e-09 | 1.000000 |
| rad42                         | 3.00669e-09 | 1.000000 | 3.00846e-09 | 1.000000 |
| rad12                         | 4.68975e-10 | 1.000000 | 4.69250e-10 | 1.000000 |
| rad15                         | 4.54774e-10 | 1.000000 | 4.55041e-10 | 1.000000 |
| rad72                         | 3.28545e-10 | 1.000000 | 3.28737e-10 | 1.000000 |
| rad23                         | 6.90254e-11 | 1.000000 | 6.90658e-11 | 1.000000 |
| rad6                          | 2.78164e-11 | 1.000000 | 2.78326e-11 | 1.000000 |
| rad45                         | 1.96041e-11 | 1.000000 | 1.96156e-11 | 1.000000 |
| rad11                         | 1.51846e-11 | 1.000000 | 1.51936e-11 | 1.000000 |
| rad19anti                     | 1.15121e-11 | 1.000000 | 1.15188e-11 | 1.000000 |
| rad2                          | 7.28012e-12 | 1.000000 | 7.28435e-12 | 1.000000 |
| rad8                          | 5.66704e-12 | 1.000000 | 5.67036e-12 | 1.000000 |
| rad7                          | 3.78134e-12 | 1.000000 | 3.78356e-12 | 1.000000 |



|          |             |         |             |         |
|----------|-------------|---------|-------------|---------|
| rad21    | 3.67158e-12 | 1.00000 | 3.67374e-12 | 1.00000 |
| rad10    | 3.10294e-12 | 1.00000 | 3.10476e-12 | 1.00000 |
| rad13    | 2.61219e-12 | 1.00000 | 2.61372e-12 | 1.00000 |
| rad1     | 2.10678e-12 | 1.00000 | 2.10801e-12 | 1.00000 |
| rad36    | 2.01840e-12 | 1.00000 | 2.01958e-12 | 1.00000 |
| rad19syn | 8.90593e-13 | 1.00000 | 8.91116e-13 | 1.00000 |
| rad20    | 8.30480e-13 | 1.00000 | 8.30964e-13 | 1.00000 |
| rad18    | 5.49055e-13 | 1.00000 | 5.49377e-13 | 1.00000 |
| rad24    | 1.80314e-13 | 1.00000 | 1.80420e-13 | 1.00000 |
| rad33    | 1.72630e-13 | 1.00000 | 1.72732e-13 | 1.00000 |
| rad26    | 1.42561e-13 | 1.00000 | 1.42645e-13 | 1.00000 |
| rad22    | 1.36918e-13 | 1.00000 | 1.36998e-13 | 1.00000 |
| rad25    | 7.72793e-14 | 1.00000 | 7.73244e-14 | 1.00000 |
| rad3     | 5.61895e-14 | 1.00000 | 5.62225e-14 | 1.00000 |
| rad4     | 4.51151e-14 | 1.00000 | 4.51416e-14 | 1.00000 |
| rad27    | 3.50896e-14 | 1.00000 | 3.51102e-14 | 1.00000 |
| rad28    | 1.35944e-14 | 1.00000 | 1.36023e-14 | 1.00000 |
| rad14    | 3.03771e-15 | 1.00000 | 3.03950e-15 | 1.00000 |
| rad31    | 2.62635e-15 | 1.00000 | 2.62789e-15 | 1.00000 |
| rad47    | 7.15141e-16 | 1.00000 | 7.15559e-16 | 1.00000 |
| rad5     | 2.18432e-17 | 1.00000 | 2.18561e-17 | 1.00000 |

0.100000000 Pa, 1500.00000 K

| Rate constant             | True (fraction)       | Effective (fraction)  |
|---------------------------|-----------------------|-----------------------|
| Total                     | 7.80417e-12 (1.00 )   | 7.79561e-12 (1.00 )   |
| Formation of rad19        | 5.22661e-12 (0.670 )  | 5.21915e-12 (0.669 )  |
| H-abstraction to cyc2enyl | 1.80920e-12 (0.232 )  | 1.80920e-12 (0.232 )  |
| H-abstraction to cyclenyl | 7.68359e-13 (0.0985 ) | 7.67262e-13 (0.0984 ) |

| species                       | PYtrue      | Cumul    | PYeffective | Cumul    |
|-------------------------------|-------------|----------|-------------|----------|
| Indene+H                      | 0.505870    | 0.505870 | 0.506425    | 0.506425 |
| Benzene+cycloprop-2-enylidene | 0.231825    | 0.737695 | 0.232079    | 0.738505 |
| PhCHCCH2+H                    | 0.135967    | 0.873662 | 0.136116    | 0.874621 |
| Benzene+cycloprop-1-enylidene | 0.0984549   | 0.972117 | 0.0984223   | 0.973043 |
| Ph+MeAc                       | 0.00470570  | 0.976823 | 0.00471086  | 0.977754 |
| Ph+Allene                     | 0.00464760  | 0.981470 | 0.00465271  | 0.982407 |
| C2H2+PhCH2                    | 0.00447301  | 0.985943 | 0.00447792  | 0.986885 |
| PhCH2CCH+H                    | 0.00304820  | 0.988991 | 0.00305155  | 0.989936 |
| PhcycC3H3_A+H                 | 0.00198976  | 0.990981 | 0.00199195  | 0.991928 |
| PhcycC3H3_B+H                 | 0.00193280  | 0.992914 | 0.00193492  | 0.993863 |
| PhCCCH3+H                     | 0.00187667  | 0.994791 | 0.00187873  | 0.995742 |
| rad67                         | 0.00179097  | 0.996582 | 0.00179294  | 0.997535 |
| PhCCH+CH3                     | 0.00117783  | 0.997759 | 0.00117912  | 0.998714 |
| Phenyl+cycC3H4                | 0.000956146 | 0.998716 | 0.000000    | 0.998714 |
| rad35                         | 0.000644848 | 0.999360 | 0.000645556 | 0.999360 |
| PAH10+CH3                     | 0.000194191 | 0.999555 | 0.000194404 | 0.999554 |
| rad37                         | 0.000129807 | 0.999684 | 0.000129949 | 0.999684 |
| PAH7+H                        | 0.000116417 | 0.999801 | 0.000116546 | 0.999800 |
| PAH9+H                        | 4.88537e-05 | 0.999850 | 4.89073e-05 | 0.999849 |
| rad38                         | 4.16012e-05 | 0.999891 | 4.16469e-05 | 0.999891 |
| PAH3+H                        | 3.23375e-05 | 0.999924 | 3.23730e-05 | 0.999923 |
| rad30                         | 2.62809e-05 | 0.999950 | 2.63097e-05 | 0.999950 |
| rad39                         | 1.87895e-05 | 0.999969 | 1.88102e-05 | 0.999969 |
| rad46                         | 7.16199e-06 | 0.999976 | 7.16986e-06 | 0.999976 |
| rad50                         | 5.93801e-06 | 0.999982 | 5.94453e-06 | 0.999982 |
| PAH1+H                        | 3.25724e-06 | 0.999985 | 3.26082e-06 | 0.999985 |
| rad59                         | 3.16157e-06 | 0.999988 | 3.16504e-06 | 0.999988 |
| rad60syn                      | 2.67968e-06 | 0.999991 | 2.68263e-06 | 0.999991 |
| rad54                         | 2.39839e-06 | 0.999993 | 2.40102e-06 | 0.999993 |
| rad60anti                     | 1.66867e-06 | 0.999995 | 1.67051e-06 | 0.999995 |
| rad51                         | 1.57343e-06 | 0.999997 | 1.57516e-06 | 0.999996 |
| rad43                         | 9.05576e-07 | 0.999997 | 9.06574e-07 | 0.999997 |
| rad70                         | 8.42763e-07 | 0.999998 | 8.43688e-07 | 0.999998 |
| rad52                         | 4.92954e-07 | 0.999999 | 4.93495e-07 | 0.999999 |
| rad58                         | 3.04449e-07 | 0.999999 | 3.04784e-07 | 0.999999 |
| rad61                         | 2.56146e-07 | 0.999999 | 2.56427e-07 | 0.999999 |
| rad34                         | 2.04935e-07 | 1.000000 | 2.05160e-07 | 0.999999 |
| rad55                         | 1.72013e-07 | 1.000000 | 1.72202e-07 | 1.000000 |
| rad9                          | 8.60443e-08 | 1.000000 | 8.61390e-08 | 1.000000 |
| rad62                         | 6.20587e-08 | 1.000000 | 6.21268e-08 | 1.000000 |
| rad41                         | 5.99065e-08 | 1.000000 | 5.99723e-08 | 1.000000 |
| PAH8+H                        | 5.38676e-08 | 1.000000 | 5.39268e-08 | 1.000000 |
| rad65                         | 4.55489e-08 | 1.000000 | 4.55989e-08 | 1.000000 |
| rad53                         | 4.12868e-08 | 1.000000 | 4.13321e-08 | 1.000000 |
| rad56                         | 3.95673e-08 | 1.000000 | 3.96108e-08 | 1.000000 |
| rad71                         | 3.50000e-08 | 1.000000 | 3.50385e-08 | 1.000000 |
| rad73                         | 2.80695e-08 | 1.000000 | 2.81004e-08 | 1.000000 |

|           |             |         |             |         |
|-----------|-------------|---------|-------------|---------|
| rad64     | 1.41255e-08 | 1.00000 | 1.41410e-08 | 1.00000 |
| rad68syn  | 1.26337e-08 | 1.00000 | 1.26476e-08 | 1.00000 |
| rad40syn  | 8.93594e-09 | 1.00000 | 8.94570e-09 | 1.00000 |
| rad68anti | 8.24827e-09 | 1.00000 | 8.25732e-09 | 1.00000 |
| rad40anti | 7.05390e-09 | 1.00000 | 7.06160e-09 | 1.00000 |
| rad42     | 4.46778e-09 | 1.00000 | 4.47269e-09 | 1.00000 |
| rad72     | 9.20584e-10 | 1.00000 | 9.21591e-10 | 1.00000 |
| rad15     | 8.08279e-10 | 1.00000 | 8.09169e-10 | 1.00000 |
| rad12     | 3.66381e-10 | 1.00000 | 3.66783e-10 | 1.00000 |
| rad23     | 6.51446e-11 | 1.00000 | 6.52161e-11 | 1.00000 |
| rad6      | 3.56870e-11 | 1.00000 | 3.57262e-11 | 1.00000 |
| rad11     | 2.27338e-11 | 1.00000 | 2.27588e-11 | 1.00000 |
| rad45     | 1.77893e-11 | 1.00000 | 1.78089e-11 | 1.00000 |
| rad19anti | 9.04738e-12 | 1.00000 | 9.05731e-12 | 1.00000 |
| rad7      | 7.40295e-12 | 1.00000 | 7.41108e-12 | 1.00000 |
| rad8      | 6.24629e-12 | 1.00000 | 6.25315e-12 | 1.00000 |
| rad10     | 5.96702e-12 | 1.00000 | 5.97357e-12 | 1.00000 |
| rad2      | 5.38912e-12 | 1.00000 | 5.39504e-12 | 1.00000 |
| rad21     | 3.97699e-12 | 1.00000 | 3.98136e-12 | 1.00000 |
| rad13     | 2.43680e-12 | 1.00000 | 2.43947e-12 | 1.00000 |
| rad36     | 1.84422e-12 | 1.00000 | 1.84624e-12 | 1.00000 |
| rad1      | 1.57848e-12 | 1.00000 | 1.58021e-12 | 1.00000 |
| rad18     | 1.02696e-12 | 1.00000 | 1.02808e-12 | 1.00000 |
| rad20     | 8.31089e-13 | 1.00000 | 8.31999e-13 | 1.00000 |
| rad19syn  | 7.89908e-13 | 1.00000 | 7.90771e-13 | 1.00000 |
| rad26     | 4.69898e-13 | 1.00000 | 4.70414e-13 | 1.00000 |
| rad24     | 1.99083e-13 | 1.00000 | 1.99302e-13 | 1.00000 |
| rad22     | 1.58773e-13 | 1.00000 | 1.58947e-13 | 1.00000 |
| rad33     | 1.52248e-13 | 1.00000 | 1.52415e-13 | 1.00000 |
| rad25     | 8.67636e-14 | 1.00000 | 8.68587e-14 | 1.00000 |
| rad3      | 3.97929e-14 | 1.00000 | 3.98366e-14 | 1.00000 |
| rad27     | 3.81303e-14 | 1.00000 | 3.81722e-14 | 1.00000 |
| rad4      | 3.16841e-14 | 1.00000 | 3.17189e-14 | 1.00000 |
| rad28     | 2.38471e-14 | 1.00000 | 2.38732e-14 | 1.00000 |
| rad14     | 3.13580e-15 | 1.00000 | 3.13925e-15 | 1.00000 |
| rad31     | 2.56266e-15 | 1.00000 | 2.56547e-15 | 1.00000 |
| rad47     | 1.33182e-15 | 1.00000 | 1.33328e-15 | 1.00000 |
| rad5      | 4.35712e-16 | 1.00000 | 4.36190e-16 | 1.00000 |

0.100000000E-01 Pa, 20.0000000 K

=====

| Rate constant             | True (fraction)         | Effective (fraction)    |
|---------------------------|-------------------------|-------------------------|
| Total                     | 1.24541e-22 (1.00 )     | 1.24541e-22 (1.00 )     |
| Formation of rad19        | 1.24541e-22 (1.00 )     | 1.24541e-22 (1.00 )     |
| H-abstraction to cyc2enyl | 3.84323e-68 (3.09e-46)  | 3.84323e-68 (3.09e-46)  |
| H-abstraction to cyc1enyl | 6.26313e-106 (5.03e-84) | 6.26313e-106 (5.03e-84) |

| species       | PYtrue      | Cumul    | PYeffective | Cumul    |
|---------------|-------------|----------|-------------|----------|
| Indene+H      | 0.999772    | 0.999772 | 0.999772    | 0.999772 |
| PhCHCCH2+H    | 0.000217007 | 0.999989 | 0.000217007 | 0.999989 |
| PhCCH+CH3     | 3.73773e-06 | 0.999993 | 3.73773e-06 | 0.999993 |
| C2H2+PhCH2    | 2.63469e-06 | 0.999995 | 2.63469e-06 | 0.999995 |
| PhCCCH3+H     | 2.10542e-06 | 0.999997 | 2.10542e-06 | 0.999997 |
| Ph+MeAc       | 1.55160e-06 | 0.999999 | 1.55160e-06 | 0.999999 |
| rad67         | 4.71511e-07 | 1.000000 | 4.71511e-07 | 1.000000 |
| rad35         | 2.08841e-07 | 1.000000 | 2.08841e-07 | 1.000000 |
| Ph+Allene     | 1.29816e-07 | 1.000000 | 1.29816e-07 | 1.000000 |
| PAH7+H        | 1.72839e-08 | 1.000000 | 1.72839e-08 | 1.000000 |
| PhCH2CCH+H    | 1.56682e-08 | 1.000000 | 1.56682e-08 | 1.000000 |
| rad39         | 4.87188e-09 | 1.000000 | 4.87188e-09 | 1.000000 |
| rad37         | 4.61476e-09 | 1.000000 | 4.61476e-09 | 1.000000 |
| rad30         | 3.89812e-09 | 1.000000 | 3.89812e-09 | 1.000000 |
| rad6          | 1.12080e-09 | 1.000000 | 1.12080e-09 | 1.000000 |
| PAH9+H        | 2.48442e-10 | 1.000000 | 2.48442e-10 | 1.000000 |
| rad38         | 1.04725e-10 | 1.000000 | 1.04725e-10 | 1.000000 |
| rad60syn      | 1.68629e-11 | 1.000000 | 1.68629e-11 | 1.000000 |
| rad60anti     | 8.23083e-12 | 1.000000 | 8.23083e-12 | 1.000000 |
| PAH3+H        | 6.68358e-12 | 1.000000 | 6.68358e-12 | 1.000000 |
| rad46         | 6.24075e-12 | 1.000000 | 6.24075e-12 | 1.000000 |
| PAH10+CH3     | 5.49620e-12 | 1.000000 | 5.49620e-12 | 1.000000 |
| rad59         | 1.38708e-12 | 1.000000 | 1.38708e-12 | 1.000000 |
| rad28         | 1.11526e-12 | 1.000000 | 1.11526e-12 | 1.000000 |
| rad2          | 1.06037e-12 | 1.000000 | 1.06037e-12 | 1.000000 |
| PhcycC3H3_A+H | 4.12988e-13 | 1.000000 | 4.12988e-13 | 1.000000 |
| rad43         | 2.56857e-13 | 1.000000 | 2.56857e-13 | 1.000000 |
| rad54         | 1.89531e-13 | 1.000000 | 1.89531e-13 | 1.000000 |
| rad26         | 1.55027e-13 | 1.000000 | 1.55027e-13 | 1.000000 |
| rad7          | 1.24311e-13 | 1.000000 | 1.24311e-13 | 1.000000 |

|                               |             |          |             |          |
|-------------------------------|-------------|----------|-------------|----------|
| rad1                          | 6.69803e-14 | 1.000000 | 6.69803e-14 | 1.000000 |
| rad10                         | 6.44793e-14 | 1.000000 | 6.44793e-14 | 1.000000 |
| rad62                         | 5.43035e-14 | 1.000000 | 5.43035e-14 | 1.000000 |
| rad50                         | 4.04143e-14 | 1.000000 | 4.04143e-14 | 1.000000 |
| rad11                         | 3.39304e-14 | 1.000000 | 3.39304e-14 | 1.000000 |
| rad3                          | 7.94613e-15 | 1.000000 | 7.94613e-15 | 1.000000 |
| rad4                          | 4.01338e-15 | 1.000000 | 4.01338e-15 | 1.000000 |
| rad70                         | 2.87795e-15 | 1.000000 | 2.87795e-15 | 1.000000 |
| rad55                         | 1.24405e-15 | 1.000000 | 1.24405e-15 | 1.000000 |
| PAH1+H                        | 5.17464e-16 | 1.000000 | 5.17464e-16 | 1.000000 |
| rad13                         | 4.61922e-16 | 1.000000 | 4.61922e-16 | 1.000000 |
| rad52                         | 2.53147e-16 | 1.000000 | 2.53147e-16 | 1.000000 |
| rad23                         | 1.68921e-16 | 1.000000 | 1.68921e-16 | 1.000000 |
| rad58                         | 7.43129e-17 | 1.000000 | 7.43129e-17 | 1.000000 |
| rad51                         | 6.08184e-17 | 1.000000 | 6.08184e-17 | 1.000000 |
| Phenyl+cycC3H4                | 2.77347e-17 | 1.000000 | 0.000000    | 1.000000 |
| rad34                         | 2.61176e-17 | 1.000000 | 2.61176e-17 | 1.000000 |
| rad42                         | 2.93768e-18 | 1.000000 | 2.93768e-18 | 1.000000 |
| rad41                         | 2.72495e-18 | 1.000000 | 2.72495e-18 | 1.000000 |
| rad45                         | 2.68406e-18 | 1.000000 | 2.68406e-18 | 1.000000 |
| rad65                         | 1.19090e-18 | 1.000000 | 1.19090e-18 | 1.000000 |
| rad9                          | 1.05891e-18 | 1.000000 | 1.05891e-18 | 1.000000 |
| rad33                         | 8.40706e-19 | 1.000000 | 8.40706e-19 | 1.000000 |
| rad14                         | 6.53887e-19 | 1.000000 | 6.53887e-19 | 1.000000 |
| rad27                         | 6.04728e-19 | 1.000000 | 6.04728e-19 | 1.000000 |
| rad25                         | 3.11943e-19 | 1.000000 | 3.11943e-19 | 1.000000 |
| rad36                         | 1.64622e-19 | 1.000000 | 1.64622e-19 | 1.000000 |
| rad22                         | 1.10606e-19 | 1.000000 | 1.10606e-19 | 1.000000 |
| rad15                         | 5.21536e-22 | 1.000000 | 5.21536e-22 | 1.000000 |
| rad31                         | 1.92790e-23 | 1.000000 | 1.92790e-23 | 1.000000 |
| rad20                         | 3.41784e-24 | 1.000000 | 3.41784e-24 | 1.000000 |
| rad21                         | 2.40508e-24 | 1.000000 | 2.40508e-24 | 1.000000 |
| rad5                          | 7.68381e-25 | 1.000000 | 7.68381e-25 | 1.000000 |
| rad18                         | 3.04578e-25 | 1.000000 | 3.04578e-25 | 1.000000 |
| PhcycC3H3_B+H                 | 2.51879e-25 | 1.000000 | 2.51879e-25 | 1.000000 |
| rad24                         | 2.52937e-26 | 1.000000 | 2.52937e-26 | 1.000000 |
| rad53                         | 1.67934e-26 | 1.000000 | 1.67934e-26 | 1.000000 |
| rad47                         | 6.07128e-27 | 1.000000 | 6.07128e-27 | 1.000000 |
| rad12                         | 4.97009e-27 | 1.000000 | 4.97009e-27 | 1.000000 |
| rad19anti                     | 6.08991e-28 | 1.000000 | 6.08991e-28 | 1.000000 |
| rad64                         | 9.27983e-29 | 1.000000 | 9.27983e-29 | 1.000000 |
| rad61                         | 6.68035e-36 | 1.000000 | 6.68035e-36 | 1.000000 |
| rad56                         | 1.31107e-37 | 1.000000 | 1.31107e-37 | 1.000000 |
| rad68syn                      | 1.06097e-39 | 1.000000 | 1.06097e-39 | 1.000000 |
| rad68anti                     | 9.05615e-40 | 1.000000 | 9.05615e-40 | 1.000000 |
| rad19syn                      | 1.37416e-41 | 1.000000 | 1.37416e-41 | 1.000000 |
| Benzene+cycloprop-2-enylidene | 3.08591e-46 | 1.000000 | 3.08591e-46 | 1.000000 |
| rad73                         | 1.01490e-47 | 1.000000 | 1.01490e-47 | 1.000000 |
| rad40syn                      | 6.38448e-49 | 1.000000 | 6.38448e-49 | 1.000000 |
| rad40anti                     | 5.19108e-49 | 1.000000 | 5.19108e-49 | 1.000000 |
| PAH8+H                        | 3.09681e-53 | 1.000000 | 3.09681e-53 | 1.000000 |
| rad71                         | 1.98161e-56 | 1.000000 | 1.98161e-56 | 1.000000 |
| rad8                          | 1.05736e-60 | 1.000000 | 1.05736e-60 | 1.000000 |
| Benzene+cycloprop-1-enylidene | 5.02895e-84 | 1.000000 | 5.02895e-84 | 1.000000 |

0.100000000E-01 Pa, 30.0000000 K

| Rate constant             | True (fraction)        | Effective (fraction)   |             |          |
|---------------------------|------------------------|------------------------|-------------|----------|
| Total                     | 8.13009e-20 (1.00 )    | 8.13009e-20 (1.00 )    |             |          |
| Formation of rad19        | 8.13009e-20 (1.00 )    | 8.13009e-20 (1.00 )    |             |          |
| H-abstraction to cyc2enyl | 1.08880e-49 (1.34e-30) | 1.08880e-49 (1.34e-30) |             |          |
| H-abstraction to cyclenyl | 7.55172e-75 (9.29e-56) | 7.55172e-75 (9.29e-56) |             |          |
| species                   | PYtrue                 | Cumul                  | PYeffective | Cumul    |
| Indene+H                  | 0.999770               | 0.999770               | 0.999770    | 0.999770 |
| PhCHCCH2+H                | 0.000218649            | 0.999989               | 0.000218649 | 0.999989 |
| PhCCH+CH3                 | 3.77338e-06            | 0.999992               | 3.77338e-06 | 0.999992 |
| C2H2+PhCH2                | 2.67292e-06            | 0.999995               | 2.67292e-06 | 0.999995 |
| PhCCCH3+H                 | 2.12445e-06            | 0.999997               | 2.12445e-06 | 0.999997 |
| Ph+MeAc                   | 1.56969e-06            | 0.999999               | 1.56969e-06 | 0.999999 |
| rad67                     | 4.76407e-07            | 0.999999               | 4.76407e-07 | 0.999999 |
| rad35                     | 2.10922e-07            | 0.999999               | 2.10922e-07 | 0.999999 |
| Ph+Allene                 | 1.34110e-07            | 1.000000               | 1.34110e-07 | 1.000000 |
| PAH7+H                    | 1.77778e-08            | 1.000000               | 1.77778e-08 | 1.000000 |
| PhCH2CCH+H                | 1.62757e-08            | 1.000000               | 1.62757e-08 | 1.000000 |
| rad39                     | 5.01256e-09            | 1.000000               | 5.01256e-09 | 1.000000 |
| rad37                     | 4.67906e-09            | 1.000000               | 4.67906e-09 | 1.000000 |
| rad30                     | 3.94063e-09            | 1.000000               | 3.94063e-09 | 1.000000 |

|                               |             |          |             |          |
|-------------------------------|-------------|----------|-------------|----------|
| PAH9+H                        | 2.54391e-10 | 1.000000 | 2.54391e-10 | 1.000000 |
| rad38                         | 1.07292e-10 | 1.000000 | 1.07292e-10 | 1.000000 |
| rad6                          | 3.26919e-11 | 1.000000 | 3.26919e-11 | 1.000000 |
| rad60syn                      | 1.71244e-11 | 1.000000 | 1.71244e-11 | 1.000000 |
| rad60anti                     | 8.36181e-12 | 1.000000 | 8.36181e-12 | 1.000000 |
| PAH3+H                        | 6.82405e-12 | 1.000000 | 6.82405e-12 | 1.000000 |
| rad46                         | 6.42741e-12 | 1.000000 | 6.42741e-12 | 1.000000 |
| PAH10+CH3                     | 5.65463e-12 | 1.000000 | 5.65463e-12 | 1.000000 |
| rad59                         | 1.41512e-12 | 1.000000 | 1.41512e-12 | 1.000000 |
| PhcycC3H3_A+H                 | 4.42056e-13 | 1.000000 | 4.42056e-13 | 1.000000 |
| rad43                         | 2.63751e-13 | 1.000000 | 2.63751e-13 | 1.000000 |
| rad54                         | 2.02591e-13 | 1.000000 | 2.02591e-13 | 1.000000 |
| rad62                         | 5.61702e-14 | 1.000000 | 5.61702e-14 | 1.000000 |
| rad50                         | 4.22466e-14 | 1.000000 | 4.22466e-14 | 1.000000 |
| rad28                         | 3.10992e-14 | 1.000000 | 3.10992e-14 | 1.000000 |
| rad2                          | 2.86265e-14 | 1.000000 | 2.86265e-14 | 1.000000 |
| rad26                         | 4.39198e-15 | 1.000000 | 4.39198e-15 | 1.000000 |
| rad7                          | 3.33922e-15 | 1.000000 | 3.33922e-15 | 1.000000 |
| rad70                         | 3.10803e-15 | 1.000000 | 3.10803e-15 | 1.000000 |
| rad1                          | 1.80920e-15 | 1.000000 | 1.80920e-15 | 1.000000 |
| rad10                         | 1.68139e-15 | 1.000000 | 1.68139e-15 | 1.000000 |
| rad55                         | 1.35411e-15 | 1.000000 | 1.35411e-15 | 1.000000 |
| rad11                         | 8.88053e-16 | 1.000000 | 8.88053e-16 | 1.000000 |
| PAH1+H                        | 5.62639e-16 | 1.000000 | 5.62639e-16 | 1.000000 |
| rad52                         | 2.67212e-16 | 1.000000 | 2.67212e-16 | 1.000000 |
| rad3                          | 2.04889e-16 | 1.000000 | 2.04889e-16 | 1.000000 |
| rad4                          | 1.03495e-16 | 1.000000 | 1.03495e-16 | 1.000000 |
| rad58                         | 7.74180e-17 | 1.000000 | 7.74180e-17 | 1.000000 |
| rad51                         | 6.48821e-17 | 1.000000 | 6.48821e-17 | 1.000000 |
| Phenyl+cycC3H4                | 5.25631e-17 | 1.000000 | 0.00000     | 1.000000 |
| rad34                         | 2.89435e-17 | 1.000000 | 2.89435e-17 | 1.000000 |
| rad13                         | 1.32658e-17 | 1.000000 | 1.32658e-17 | 1.000000 |
| rad42                         | 3.14837e-18 | 1.000000 | 3.14837e-18 | 1.000000 |
| rad41                         | 2.94052e-18 | 1.000000 | 2.94052e-18 | 1.000000 |
| rad65                         | 1.27676e-18 | 1.000000 | 1.27676e-18 | 1.000000 |
| rad23                         | 1.16376e-18 | 1.000000 | 1.16376e-18 | 1.000000 |
| rad33                         | 2.45067e-20 | 1.000000 | 2.45067e-20 | 1.000000 |
| rad14                         | 1.73173e-20 | 1.000000 | 1.73173e-20 | 1.000000 |
| rad45                         | 1.65033e-20 | 1.000000 | 1.65033e-20 | 1.000000 |
| rad27                         | 1.61030e-20 | 1.000000 | 1.61030e-20 | 1.000000 |
| rad9                          | 1.51229e-20 | 1.000000 | 1.51229e-20 | 1.000000 |
| rad25                         | 8.93700e-21 | 1.000000 | 8.93700e-21 | 1.000000 |
| rad36                         | 1.01203e-21 | 1.000000 | 1.01203e-21 | 1.000000 |
| rad22                         | 6.75912e-22 | 1.000000 | 6.75912e-22 | 1.000000 |
| rad15                         | 7.12305e-24 | 1.000000 | 7.12305e-24 | 1.000000 |
| rad31                         | 5.19332e-25 | 1.000000 | 5.19332e-25 | 1.000000 |
| PhcycC3H3_B+H                 | 1.88459e-25 | 1.000000 | 1.88459e-25 | 1.000000 |
| rad20                         | 7.91143e-26 | 1.000000 | 7.91143e-26 | 1.000000 |
| rad21                         | 5.66864e-26 | 1.000000 | 5.66864e-26 | 1.000000 |
| rad53                         | 1.03126e-26 | 1.000000 | 1.03126e-26 | 1.000000 |
| rad5                          | 6.23694e-27 | 1.000000 | 6.23694e-27 | 1.000000 |
| rad18                         | 3.33889e-27 | 1.000000 | 3.33889e-27 | 1.000000 |
| rad47                         | 2.84043e-27 | 1.000000 | 2.84043e-27 | 1.000000 |
| rad24                         | 1.68860e-28 | 1.000000 | 1.68860e-28 | 1.000000 |
| rad12                         | 7.10528e-29 | 1.000000 | 7.10528e-29 | 1.000000 |
| rad64                         | 5.16113e-29 | 1.000000 | 5.16113e-29 | 1.000000 |
| rad19anti                     | 8.90356e-30 | 1.000000 | 8.90356e-30 | 1.000000 |
| Benzene+cycloprop-2-enylidene | 1.33923e-30 | 1.000000 | 1.33923e-30 | 1.000000 |
| rad61                         | 4.50517e-36 | 1.000000 | 4.50517e-36 | 1.000000 |
| rad56                         | 5.37551e-38 | 1.000000 | 5.37551e-38 | 1.000000 |
| rad68syn                      | 4.22107e-40 | 1.000000 | 4.22107e-40 | 1.000000 |
| rad68anti                     | 3.60691e-40 | 1.000000 | 3.60691e-40 | 1.000000 |
| rad19syn                      | 8.38610e-42 | 1.000000 | 8.38610e-42 | 1.000000 |
| rad73                         | 3.77955e-48 | 1.000000 | 3.77955e-48 | 1.000000 |
| rad40syn                      | 3.48159e-49 | 1.000000 | 3.48159e-49 | 1.000000 |
| rad40anti                     | 2.85172e-49 | 1.000000 | 2.85172e-49 | 1.000000 |
| PAH8+H                        | 1.50946e-53 | 1.000000 | 1.50946e-53 | 1.000000 |
| Benzene+cycloprop-1-enylidene | 9.28861e-56 | 1.000000 | 9.28861e-56 | 1.000000 |
| rad71                         | 7.02097e-57 | 1.000000 | 7.02097e-57 | 1.000000 |
| rad8                          | 1.53863e-61 | 1.000000 | 1.53863e-61 | 1.000000 |

0.100000000E-01 Pa, 40.000000 K

| Rate constant             | True (fraction)        | Effective (fraction)   |
|---------------------------|------------------------|------------------------|
| Total                     | 2.24819e-18 (1.00 )    | 2.24819e-18 (1.00 )    |
| Formation of rad19        | 2.24819e-18 (1.00 )    | 2.24819e-18 (1.00 )    |
| H-abstraction to cyc2enyl | 1.72361e-40 (7.67e-23) | 1.72361e-40 (7.67e-23) |
| H-abstraction to cyclenyl | 2.48792e-59 (1.11e-41) | 2.48792e-59 (1.11e-41) |

| species                       | PYtrue      | Cumul    | PYeffective | Cumul    |
|-------------------------------|-------------|----------|-------------|----------|
| Indene+H                      | 0.999767    | 0.999767 | 0.999767    | 0.999767 |
| PhCHCCH2+H                    | 0.000221686 | 0.999989 | 0.000221686 | 0.999989 |
| PhCCH+CH3                     | 3.83213e-06 | 0.999993 | 3.83213e-06 | 0.999993 |
| C2H2+PhCH2                    | 2.72500e-06 | 0.999995 | 2.72500e-06 | 0.999995 |
| PhCCCH3+H                     | 2.15972e-06 | 0.999997 | 2.15972e-06 | 0.999997 |
| Ph+MeAc                       | 1.60176e-06 | 0.999999 | 1.60176e-06 | 0.999999 |
| rad67                         | 4.85525e-07 | 0.999999 | 4.85525e-07 | 0.999999 |
| rad35                         | 2.14793e-07 | 1.000000 | 2.14793e-07 | 1.000000 |
| Ph+Allene                     | 1.38511e-07 | 1.000000 | 1.38511e-07 | 1.000000 |
| PAH7+H                        | 1.82784e-08 | 1.000000 | 1.82784e-08 | 1.000000 |
| PhCH2CCH+H                    | 1.68986e-08 | 1.000000 | 1.68986e-08 | 1.000000 |
| rad39                         | 5.15448e-09 | 1.000000 | 5.15448e-09 | 1.000000 |
| rad37                         | 4.79482e-09 | 1.000000 | 4.79482e-09 | 1.000000 |
| rad30                         | 4.01531e-09 | 1.000000 | 4.01531e-09 | 1.000000 |
| PAH9+H                        | 2.61411e-10 | 1.000000 | 2.61411e-10 | 1.000000 |
| rad38                         | 1.10472e-10 | 1.000000 | 1.10472e-10 | 1.000000 |
| rad60syn                      | 1.75792e-11 | 1.000000 | 1.75792e-11 | 1.000000 |
| rad60anti                     | 8.58950e-12 | 1.000000 | 8.58950e-12 | 1.000000 |
| PAH3+H                        | 7.06954e-12 | 1.000000 | 7.06954e-12 | 1.000000 |
| rad46                         | 6.64005e-12 | 1.000000 | 6.64005e-12 | 1.000000 |
| PAH10+CH3                     | 5.94247e-12 | 1.000000 | 5.94247e-12 | 1.000000 |
| rad6                          | 3.89932e-12 | 1.000000 | 3.89932e-12 | 1.000000 |
| rad59                         | 1.46407e-12 | 1.000000 | 1.46407e-12 | 1.000000 |
| PhcycC3H3_A+H                 | 5.01131e-13 | 1.000000 | 5.01131e-13 | 1.000000 |
| rad43                         | 2.75792e-13 | 1.000000 | 2.75792e-13 | 1.000000 |
| rad54                         | 2.15455e-13 | 1.000000 | 2.15455e-13 | 1.000000 |
| rad62                         | 5.89574e-14 | 1.000000 | 5.89574e-14 | 1.000000 |
| rad50                         | 4.43128e-14 | 1.000000 | 4.43128e-14 | 1.000000 |
| rad28                         | 3.62958e-15 | 1.000000 | 3.62958e-15 | 1.000000 |
| rad70                         | 3.35802e-15 | 1.000000 | 3.35802e-15 | 1.000000 |
| rad2                          | 3.25862e-15 | 1.000000 | 3.25862e-15 | 1.000000 |
| rad55                         | 1.46817e-15 | 1.000000 | 1.46817e-15 | 1.000000 |
| PAH1+H                        | 6.22177e-16 | 1.000000 | 6.22177e-16 | 1.000000 |
| rad26                         | 5.13218e-16 | 1.000000 | 5.13218e-16 | 1.000000 |
| rad7                          | 3.81803e-16 | 1.000000 | 3.81803e-16 | 1.000000 |
| rad52                         | 2.83398e-16 | 1.000000 | 2.83398e-16 | 1.000000 |
| rad1                          | 2.06177e-16 | 1.000000 | 2.06177e-16 | 1.000000 |
| rad10                         | 1.87978e-16 | 1.000000 | 1.87978e-16 | 1.000000 |
| Phenyl+cycC3H4                | 1.15738e-16 | 1.000000 | 0.000000    | 1.000000 |
| rad11                         | 1.00249e-16 | 1.000000 | 1.00249e-16 | 1.000000 |
| rad58                         | 8.30962e-17 | 1.000000 | 8.30962e-17 | 1.000000 |
| rad51                         | 6.97169e-17 | 1.000000 | 6.97169e-17 | 1.000000 |
| rad34                         | 3.23160e-17 | 1.000000 | 3.23160e-17 | 1.000000 |
| rad3                          | 2.28141e-17 | 1.000000 | 2.28141e-17 | 1.000000 |
| rad4                          | 1.15267e-17 | 1.000000 | 1.15267e-17 | 1.000000 |
| rad42                         | 3.51044e-18 | 1.000000 | 3.51044e-18 | 1.000000 |
| rad41                         | 3.37096e-18 | 1.000000 | 3.37096e-18 | 1.000000 |
| rad13                         | 1.57508e-18 | 1.000000 | 1.57508e-18 | 1.000000 |
| rad65                         | 1.38092e-18 | 1.000000 | 1.38092e-18 | 1.000000 |
| rad23                         | 5.72379e-20 | 1.000000 | 5.72379e-20 | 1.000000 |
| rad33                         | 2.92582e-21 | 1.000000 | 2.92582e-21 | 1.000000 |
| rad14                         | 1.96946e-21 | 1.000000 | 1.96946e-21 | 1.000000 |
| rad27                         | 1.82652e-21 | 1.000000 | 1.82652e-21 | 1.000000 |
| rad9                          | 1.63375e-21 | 1.000000 | 1.63375e-21 | 1.000000 |
| rad25                         | 1.06049e-21 | 1.000000 | 1.06049e-21 | 1.000000 |
| rad45                         | 7.64599e-22 | 1.000000 | 7.64599e-22 | 1.000000 |
| Benzene+cycloprop-2-enylidene | 7.66665e-23 | 1.000000 | 7.66665e-23 | 1.000000 |
| rad36                         | 4.68713e-23 | 1.000000 | 4.68713e-23 | 1.000000 |
| rad22                         | 3.13407e-23 | 1.000000 | 3.13407e-23 | 1.000000 |
| PhcycC3H3_B+H                 | 1.11671e-24 | 1.000000 | 1.11671e-24 | 1.000000 |
| rad15                         | 7.53806e-25 | 1.000000 | 7.53806e-25 | 1.000000 |
| rad31                         | 5.93831e-26 | 1.000000 | 5.93831e-26 | 1.000000 |
| rad53                         | 1.39443e-26 | 1.000000 | 1.39443e-26 | 1.000000 |
| rad20                         | 8.82924e-27 | 1.000000 | 8.82924e-27 | 1.000000 |
| rad21                         | 6.37702e-27 | 1.000000 | 6.37702e-27 | 1.000000 |
| rad47                         | 1.87853e-27 | 1.000000 | 1.87853e-27 | 1.000000 |
| rad5                          | 5.81015e-28 | 1.000000 | 5.81015e-28 | 1.000000 |
| rad18                         | 2.53730e-28 | 1.000000 | 2.53730e-28 | 1.000000 |
| rad64                         | 6.81413e-29 | 1.000000 | 6.81413e-29 | 1.000000 |
| rad24                         | 8.22626e-30 | 1.000000 | 8.22626e-30 | 1.000000 |
| rad12                         | 7.69324e-30 | 1.000000 | 7.69324e-30 | 1.000000 |
| rad19anti                     | 1.04556e-30 | 1.000000 | 1.04556e-30 | 1.000000 |
| rad61                         | 7.28132e-36 | 1.000000 | 7.28132e-36 | 1.000000 |
| rad56                         | 6.82099e-38 | 1.000000 | 6.82099e-38 | 1.000000 |
| rad68syn                      | 5.38230e-40 | 1.000000 | 5.38230e-40 | 1.000000 |
| rad68anti                     | 4.59875e-40 | 1.000000 | 4.59875e-40 | 1.000000 |
| Benzene+cycloprop-1-enylidene | 1.10663e-41 | 1.000000 | 1.10663e-41 | 1.000000 |
| rad19syn                      | 8.61360e-42 | 1.000000 | 8.61360e-42 | 1.000000 |

|           |             |          |             |          |
|-----------|-------------|----------|-------------|----------|
| rad73     | 4.96285e-48 | 1.000000 | 4.96285e-48 | 1.000000 |
| rad40syn  | 6.32792e-49 | 1.000000 | 6.32792e-49 | 1.000000 |
| rad40anti | 5.19527e-49 | 1.000000 | 5.19527e-49 | 1.000000 |
| PAH8+H    | 2.75147e-53 | 1.000000 | 2.75147e-53 | 1.000000 |
| rad71     | 9.94568e-57 | 1.000000 | 9.94568e-57 | 1.000000 |
| rad8      | 1.02405e-61 | 1.000000 | 1.02405e-61 | 1.000000 |

0.100000000E-01 Pa, 50.0000000 K

=====

| Rate constant             | True (fraction)        | Effective (fraction)   |
|---------------------------|------------------------|------------------------|
| Total                     | 1.72707e-17 (1.00 )    | 1.72707e-17 (1.00 )    |
| Formation of rad19        | 1.72707e-17 (1.00 )    | 1.72707e-17 (1.00 )    |
| H-abstraction to cyc2enyl | 5.49905e-35 (3.18e-18) | 5.49905e-35 (3.18e-18) |
| H-abstraction to cyclenyl | 4.93090e-50 (2.86e-33) | 4.93090e-50 (2.86e-33) |

| species                       | PYtrue      | Cumul    | PYeffective | Cumul    |
|-------------------------------|-------------|----------|-------------|----------|
| Indene+H                      | 0.999763    | 0.999763 | 0.999763    | 0.999763 |
| PhCHCCH2+H                    | 0.000225610 | 0.999989 | 0.000225610 | 0.999989 |
| PhCCH+CH3                     | 3.90696e-06 | 0.999993 | 3.90696e-06 | 0.999993 |
| C2H2+PhCH2                    | 2.78966e-06 | 0.999995 | 2.78966e-06 | 0.999995 |
| PhCCCH3+H                     | 2.20542e-06 | 0.999998 | 2.20542e-06 | 0.999998 |
| Ph+MeAc                       | 1.64324e-06 | 0.999999 | 1.64324e-06 | 0.999999 |
| rad67                         | 4.97381e-07 | 1.000000 | 4.97381e-07 | 1.000000 |
| rad35                         | 2.19821e-07 | 1.000000 | 2.19821e-07 | 1.000000 |
| Ph+Allene                     | 1.43685e-07 | 1.000000 | 1.43685e-07 | 1.000000 |
| PAH7+H                        | 1.88638e-08 | 1.000000 | 1.88638e-08 | 1.000000 |
| PhCH2CCH+H                    | 1.76333e-08 | 1.000000 | 1.76333e-08 | 1.000000 |
| rad39                         | 5.32027e-09 | 1.000000 | 5.32027e-09 | 1.000000 |
| rad37                         | 4.94554e-09 | 1.000000 | 4.94554e-09 | 1.000000 |
| rad30                         | 4.11172e-09 | 1.000000 | 4.11172e-09 | 1.000000 |
| PAH9+H                        | 2.69930e-10 | 1.000000 | 2.69930e-10 | 1.000000 |
| rad38                         | 1.14381e-10 | 1.000000 | 1.14381e-10 | 1.000000 |
| rad60syn                      | 1.81698e-11 | 1.000000 | 1.81698e-11 | 1.000000 |
| rad60anti                     | 8.88546e-12 | 1.000000 | 8.88546e-12 | 1.000000 |
| PAH3+H                        | 7.39163e-12 | 1.000000 | 7.39163e-12 | 1.000000 |
| rad46                         | 6.89697e-12 | 1.000000 | 6.89697e-12 | 1.000000 |
| PAH10+CH3                     | 6.32744e-12 | 1.000000 | 6.32744e-12 | 1.000000 |
| rad59                         | 1.52818e-12 | 1.000000 | 1.52818e-12 | 1.000000 |
| rad6                          | 8.52645e-13 | 1.000000 | 8.52645e-13 | 1.000000 |
| PhcycC3H3_A+H                 | 5.85721e-13 | 1.000000 | 5.85721e-13 | 1.000000 |
| rad43                         | 2.91709e-13 | 1.000000 | 2.91709e-13 | 1.000000 |
| rad54                         | 2.30671e-13 | 1.000000 | 2.30671e-13 | 1.000000 |
| rad62                         | 6.25569e-14 | 1.000000 | 6.25569e-14 | 1.000000 |
| rad50                         | 4.68301e-14 | 1.000000 | 4.68301e-14 | 1.000000 |
| rad70                         | 3.66567e-15 | 1.000000 | 3.66567e-15 | 1.000000 |
| rad55                         | 1.60650e-15 | 1.000000 | 1.60650e-15 | 1.000000 |
| rad28                         | 7.83127e-16 | 1.000000 | 7.83127e-16 | 1.000000 |
| PAH1+H                        | 7.00475e-16 | 1.000000 | 7.00475e-16 | 1.000000 |
| rad2                          | 6.89388e-16 | 1.000000 | 6.89388e-16 | 1.000000 |
| rad52                         | 3.03378e-16 | 1.000000 | 3.03378e-16 | 1.000000 |
| Phenyl+cycC3H4                | 2.36668e-16 | 1.000000 | 0.000000    | 1.000000 |
| rad26                         | 1.10520e-16 | 1.000000 | 1.10520e-16 | 1.000000 |
| rad58                         | 9.08493e-17 | 1.000000 | 9.08493e-17 | 1.000000 |
| rad7                          | 8.12251e-17 | 1.000000 | 8.12251e-17 | 1.000000 |
| rad51                         | 7.57965e-17 | 1.000000 | 7.57965e-17 | 1.000000 |
| rad1                          | 4.36890e-17 | 1.000000 | 4.36890e-17 | 1.000000 |
| rad10                         | 3.93028e-17 | 1.000000 | 3.93028e-17 | 1.000000 |
| rad34                         | 3.66069e-17 | 1.000000 | 3.66069e-17 | 1.000000 |
| rad11                         | 2.11568e-17 | 1.000000 | 2.11568e-17 | 1.000000 |
| rad3                          | 4.76133e-18 | 1.000000 | 4.76133e-18 | 1.000000 |
| rad42                         | 4.03684e-18 | 1.000000 | 4.03684e-18 | 1.000000 |
| rad41                         | 4.00952e-18 | 1.000000 | 4.00952e-18 | 1.000000 |
| Benzene+cycloprop-2-enylidene | 3.18404e-18 | 1.000000 | 3.18404e-18 | 1.000000 |
| rad4                          | 2.40645e-18 | 1.000000 | 2.40645e-18 | 1.000000 |
| rad65                         | 1.51314e-18 | 1.000000 | 1.51314e-18 | 1.000000 |
| rad13                         | 3.43921e-19 | 1.000000 | 3.43921e-19 | 1.000000 |
| rad23                         | 6.58965e-21 | 1.000000 | 6.58965e-21 | 1.000000 |
| rad33                         | 6.40894e-22 | 1.000000 | 6.40894e-22 | 1.000000 |
| rad14                         | 4.18106e-22 | 1.000000 | 4.18106e-22 | 1.000000 |
| rad27                         | 3.86191e-22 | 1.000000 | 3.86191e-22 | 1.000000 |
| rad9                          | 3.78722e-22 | 1.000000 | 3.78722e-22 | 1.000000 |
| PhcycC3H3_B+H                 | 2.98958e-22 | 1.000000 | 2.98958e-22 | 1.000000 |
| rad25                         | 2.31540e-22 | 1.000000 | 2.31540e-22 | 1.000000 |
| rad45                         | 8.46166e-23 | 1.000000 | 8.46166e-23 | 1.000000 |
| rad36                         | 5.18499e-24 | 1.000000 | 5.18499e-24 | 1.000000 |
| rad22                         | 3.47503e-24 | 1.000000 | 3.47503e-24 | 1.000000 |
| rad15                         | 1.72630e-25 | 1.000000 | 1.72630e-25 | 1.000000 |
| rad53                         | 3.87285e-26 | 1.000000 | 3.87285e-26 | 1.000000 |

|                               |             |         |             |         |
|-------------------------------|-------------|---------|-------------|---------|
| rad31                         | 1.26748e-26 | 1.00000 | 1.26748e-26 | 1.00000 |
| rad20                         | 1.90134e-27 | 1.00000 | 1.90134e-27 | 1.00000 |
| rad47                         | 1.42080e-27 | 1.00000 | 1.42080e-27 | 1.00000 |
| rad21                         | 1.38013e-27 | 1.00000 | 1.38013e-27 | 1.00000 |
| rad64                         | 1.59073e-28 | 1.00000 | 1.59073e-28 | 1.00000 |
| rad5                          | 1.53499e-28 | 1.00000 | 1.53499e-28 | 1.00000 |
| rad18                         | 4.26643e-29 | 1.00000 | 4.26643e-29 | 1.00000 |
| rad12                         | 1.78920e-30 | 1.00000 | 1.78920e-30 | 1.00000 |
| rad24                         | 9.44402e-31 | 1.00000 | 9.44402e-31 | 1.00000 |
| rad19anti                     | 3.05835e-31 | 1.00000 | 3.05835e-31 | 1.00000 |
| Benzene+cycloprop-1-enylidene | 2.85507e-33 | 1.00000 | 2.85507e-33 | 1.00000 |
| rad61                         | 2.03332e-35 | 1.00000 | 2.03332e-35 | 1.00000 |
| rad56                         | 1.62004e-37 | 1.00000 | 1.62004e-37 | 1.00000 |
| rad68syn                      | 1.30242e-39 | 1.00000 | 1.30242e-39 | 1.00000 |
| rad68anti                     | 1.11220e-39 | 1.00000 | 1.11220e-39 | 1.00000 |
| rad19syn                      | 1.15714e-41 | 1.00000 | 1.15714e-41 | 1.00000 |
| rad73                         | 1.29221e-47 | 1.00000 | 1.29221e-47 | 1.00000 |
| rad40syn                      | 2.30184e-48 | 1.00000 | 2.30184e-48 | 1.00000 |
| rad40anti                     | 1.89092e-48 | 1.00000 | 1.89092e-48 | 1.00000 |
| PAH8+H                        | 1.06168e-52 | 1.00000 | 1.06168e-52 | 1.00000 |
| rad71                         | 3.00988e-56 | 1.00000 | 3.00988e-56 | 1.00000 |
| rad8                          | 9.24480e-62 | 1.00000 | 9.24480e-62 | 1.00000 |

0.100000000E-01 Pa, 60.0000000 K

=====

| Rate constant             | True (fraction)        | Effective (fraction)   |
|---------------------------|------------------------|------------------------|
| Total                     | 6.93738e-17 (1.00 )    | 6.93738e-17 (1.00 )    |
| Formation of rad19        | 6.93738e-17 (1.000 )   | 6.93738e-17 (1.000 )   |
| H-abstraction to cyc2enyl | 2.50609e-31 (3.61e-15) | 2.50609e-31 (3.61e-15) |
| H-abstraction to cyc1enyl | 7.62015e-44 (1.10e-27) | 7.62015e-44 (1.10e-27) |

| species                       | PYtrue      | Cumul    | PYeffective | Cumul    |
|-------------------------------|-------------|----------|-------------|----------|
| Indene+H                      | 0.999758    | 0.999758 | 0.999758    | 0.999758 |
| PhCHCCH2+H                    | 0.000230082 | 0.999988 | 0.000230082 | 0.999988 |
| PhCCH+CH3                     | 3.99185e-06 | 0.999992 | 3.99185e-06 | 0.999992 |
| C2H2+PhCH2                    | 2.86277e-06 | 0.999995 | 2.86277e-06 | 0.999995 |
| PhCCCH3+H                     | 2.25765e-06 | 0.999997 | 2.25765e-06 | 0.999997 |
| Ph+MeAc                       | 1.69080e-06 | 0.999999 | 1.69080e-06 | 0.999999 |
| rad67                         | 5.10988e-07 | 0.999999 | 5.10988e-07 | 0.999999 |
| rad35                         | 2.25587e-07 | 1.000000 | 2.25587e-07 | 1.000000 |
| Ph+Allene                     | 1.49492e-07 | 1.000000 | 1.49492e-07 | 1.000000 |
| PAH7+H                        | 1.95169e-08 | 1.000000 | 1.95169e-08 | 1.000000 |
| PhCH2CCH+H                    | 1.84625e-08 | 1.000000 | 1.84625e-08 | 1.000000 |
| rad39                         | 5.50513e-09 | 1.000000 | 5.50513e-09 | 1.000000 |
| rad37                         | 5.11967e-09 | 1.000000 | 5.11967e-09 | 1.000000 |
| rad30                         | 4.22216e-09 | 1.000000 | 4.22216e-09 | 1.000000 |
| PAH9+H                        | 2.79568e-10 | 1.000000 | 2.79568e-10 | 1.000000 |
| rad38                         | 1.18833e-10 | 1.000000 | 1.18833e-10 | 1.000000 |
| rad60syn                      | 1.88534e-11 | 1.000000 | 1.88534e-11 | 1.000000 |
| rad60anti                     | 9.22829e-12 | 1.000000 | 9.22829e-12 | 1.000000 |
| PAH3+H                        | 7.76934e-12 | 1.000000 | 7.76934e-12 | 1.000000 |
| rad46                         | 7.18861e-12 | 1.000000 | 7.18861e-12 | 1.000000 |
| PAH10+CH3                     | 6.78829e-12 | 1.000000 | 6.78829e-12 | 1.000000 |
| rad59                         | 1.60320e-12 | 1.000000 | 1.60320e-12 | 1.000000 |
| PhcycC3H3_A+H                 | 6.95526e-13 | 1.000000 | 6.95526e-13 | 1.000000 |
| rad43                         | 3.10571e-13 | 1.000000 | 3.10571e-13 | 1.000000 |
| rad6                          | 2.61390e-13 | 1.000000 | 2.61390e-13 | 1.000000 |
| rad54                         | 2.48184e-13 | 1.000000 | 2.48184e-13 | 1.000000 |
| rad62                         | 6.67972e-14 | 1.000000 | 6.67972e-14 | 1.000000 |
| rad50                         | 4.97358e-14 | 1.000000 | 4.97358e-14 | 1.000000 |
| rad70                         | 4.03021e-15 | 1.000000 | 4.03021e-15 | 1.000000 |
| Benzene+cycloprop-2-enylidene | 3.61245e-15 | 1.000000 | 3.61245e-15 | 1.000000 |
| rad55                         | 1.76939e-15 | 1.000000 | 1.76939e-15 | 1.000000 |
| PAH1+H                        | 7.97457e-16 | 1.000000 | 7.97457e-16 | 1.000000 |
| Phenyl+cycC3H4                | 4.45921e-16 | 1.000000 | 0.000000    | 1.000000 |
| rad52                         | 3.26782e-16 | 1.000000 | 3.26782e-16 | 1.000000 |
| rad28                         | 2.37885e-16 | 1.000000 | 2.37885e-16 | 1.000000 |
| rad2                          | 2.06056e-16 | 1.000000 | 2.06056e-16 | 1.000000 |
| rad58                         | 1.00394e-16 | 1.000000 | 1.00394e-16 | 1.000000 |
| rad51                         | 8.30505e-17 | 1.000000 | 8.30505e-17 | 1.000000 |
| rad34                         | 4.18526e-17 | 1.000000 | 4.18526e-17 | 1.000000 |
| rad26                         | 3.34769e-17 | 1.000000 | 3.34769e-17 | 1.000000 |
| rad7                          | 2.44105e-17 | 1.000000 | 2.44105e-17 | 1.000000 |
| rad1                          | 1.30848e-17 | 1.000000 | 1.30848e-17 | 1.000000 |
| rad10                         | 1.16476e-17 | 1.000000 | 1.16476e-17 | 1.000000 |
| rad11                         | 6.32273e-18 | 1.000000 | 6.32273e-18 | 1.000000 |
| rad41                         | 4.85657e-18 | 1.000000 | 4.85657e-18 | 1.000000 |
| rad42                         | 4.72998e-18 | 1.000000 | 4.72998e-18 | 1.000000 |

|                               |             |          |             |          |
|-------------------------------|-------------|----------|-------------|----------|
| rad65                         | 1.67235e-18 | 1.000000 | 1.67235e-18 | 1.000000 |
| rad3                          | 1.40983e-18 | 1.000000 | 1.40983e-18 | 1.000000 |
| rad4                          | 7.12862e-19 | 1.000000 | 7.12862e-19 | 1.000000 |
| rad13                         | 1.05431e-19 | 1.000000 | 1.05431e-19 | 1.000000 |
| PhcycC3H3_B+H                 | 1.47038e-20 | 1.000000 | 1.47038e-20 | 1.000000 |
| rad23                         | 1.22377e-21 | 1.000000 | 1.22377e-21 | 1.000000 |
| rad33                         | 1.96922e-22 | 1.000000 | 1.96922e-22 | 1.000000 |
| rad9                          | 1.31673e-22 | 1.000000 | 1.31673e-22 | 1.000000 |
| rad14                         | 1.25597e-22 | 1.000000 | 1.25597e-22 | 1.000000 |
| rad27                         | 1.15523e-22 | 1.000000 | 1.15523e-22 | 1.000000 |
| rad25                         | 7.09903e-23 | 1.000000 | 7.09903e-23 | 1.000000 |
| rad45                         | 1.52652e-23 | 1.000000 | 1.52652e-23 | 1.000000 |
| rad36                         | 9.35024e-25 | 1.000000 | 9.35024e-25 | 1.000000 |
| rad22                         | 6.28398e-25 | 1.000000 | 6.28398e-25 | 1.000000 |
| rad53                         | 4.61558e-25 | 1.000000 | 4.61558e-25 | 1.000000 |
| rad15                         | 5.95423e-26 | 1.000000 | 5.95423e-26 | 1.000000 |
| rad31                         | 3.83506e-27 | 1.000000 | 3.83506e-27 | 1.000000 |
| rad64                         | 1.47832e-27 | 1.000000 | 1.47832e-27 | 1.000000 |
| rad47                         | 1.15651e-27 | 1.000000 | 1.15651e-27 | 1.000000 |
| Benzene+cycloprop-1-enylidene | 1.09842e-27 | 1.000000 | 1.09842e-27 | 1.000000 |
| rad20                         | 5.88173e-28 | 1.000000 | 5.88173e-28 | 1.000000 |
| rad21                         | 4.28542e-28 | 1.000000 | 4.28542e-28 | 1.000000 |
| rad5                          | 6.51325e-29 | 1.000000 | 6.51325e-29 | 1.000000 |
| rad18                         | 1.10567e-29 | 1.000000 | 1.10567e-29 | 1.000000 |
| rad12                         | 6.24571e-31 | 1.000000 | 6.24571e-31 | 1.000000 |
| rad24                         | 1.75446e-31 | 1.000000 | 1.75446e-31 | 1.000000 |
| rad19anti                     | 1.70588e-31 | 1.000000 | 1.70588e-31 | 1.000000 |
| rad61                         | 1.49327e-34 | 1.000000 | 1.49327e-34 | 1.000000 |
| rad56                         | 7.40844e-37 | 1.000000 | 7.40844e-37 | 1.000000 |
| rad68syn                      | 6.10594e-39 | 1.000000 | 6.10594e-39 | 1.000000 |
| rad68anti                     | 5.20993e-39 | 1.000000 | 5.20993e-39 | 1.000000 |
| rad19syn                      | 1.80508e-41 | 1.000000 | 1.80508e-41 | 1.000000 |
| rad73                         | 6.68372e-47 | 1.000000 | 6.68372e-47 | 1.000000 |
| rad40syn                      | 1.61810e-47 | 1.000000 | 1.61810e-47 | 1.000000 |
| rad40anti                     | 1.32825e-47 | 1.000000 | 1.32825e-47 | 1.000000 |
| PAH8+H                        | 8.27031e-52 | 1.000000 | 8.27031e-52 | 1.000000 |
| rad71                         | 1.90942e-55 | 1.000000 | 1.90942e-55 | 1.000000 |
| rad8                          | 9.56307e-62 | 1.000000 | 9.56307e-62 | 1.000000 |

0.100000000E-01 Pa, 70.0000000 K

| Rate constant             | True (fraction)        | Effective (fraction)   |
|---------------------------|------------------------|------------------------|
| Total                     | 1.91520e-16 (1.00 )    | 1.91520e-16 (1.00 )    |
| Formation of rad19        | 1.91520e-16 (1.000 )   | 1.91520e-16 (1.000 )   |
| H-abstraction to cyc2enyl | 1.01125e-28 (5.28e-13) | 1.01125e-28 (5.28e-13) |
| H-abstraction to cyc1enyl | 1.97822e-39 (1.03e-23) | 1.97822e-39 (1.03e-23) |

| species                       | PYtrue      | Cumul    | PYeffective | Cumul    |
|-------------------------------|-------------|----------|-------------|----------|
| Indene+H                      | 0.999753    | 0.999753 | 0.999753    | 0.999753 |
| PhCHCCH2+H                    | 0.000234973 | 0.999988 | 0.000234973 | 0.999988 |
| PhCCH+CH3                     | 4.08454e-06 | 0.999992 | 4.08454e-06 | 0.999992 |
| C2H2+PhCH2                    | 2.94282e-06 | 0.999995 | 2.94282e-06 | 0.999995 |
| PhCCCH3+H                     | 2.31497e-06 | 0.999997 | 2.31497e-06 | 0.999997 |
| Ph+MeAc                       | 1.74329e-06 | 0.999999 | 1.74329e-06 | 0.999999 |
| rad67                         | 5.25996e-07 | 1.000000 | 5.25996e-07 | 1.000000 |
| rad35                         | 2.31937e-07 | 1.000000 | 2.31937e-07 | 1.000000 |
| Ph+Allene                     | 1.55889e-07 | 1.000000 | 1.55889e-07 | 1.000000 |
| PAH7+H                        | 2.02315e-08 | 1.000000 | 2.02315e-08 | 1.000000 |
| PhCH2CCH+H                    | 1.93820e-08 | 1.000000 | 1.93820e-08 | 1.000000 |
| rad39                         | 5.70734e-09 | 1.000000 | 5.70734e-09 | 1.000000 |
| rad37                         | 5.31335e-09 | 1.000000 | 5.31335e-09 | 1.000000 |
| rad30                         | 4.34389e-09 | 1.000000 | 4.34389e-09 | 1.000000 |
| PAH9+H                        | 2.90198e-10 | 1.000000 | 2.90198e-10 | 1.000000 |
| rad38                         | 1.23773e-10 | 1.000000 | 1.23773e-10 | 1.000000 |
| rad60syn                      | 1.96160e-11 | 1.000000 | 1.96160e-11 | 1.000000 |
| rad60anti                     | 9.61119e-12 | 1.000000 | 9.61119e-12 | 1.000000 |
| PAH3+H                        | 8.19717e-12 | 1.000000 | 8.19717e-12 | 1.000000 |
| rad46                         | 7.51217e-12 | 1.000000 | 7.51217e-12 | 1.000000 |
| PAH10+CH3                     | 7.32220e-12 | 1.000000 | 7.32220e-12 | 1.000000 |
| rad59                         | 1.68797e-12 | 1.000000 | 1.68797e-12 | 1.000000 |
| PhcycC3H3_A+H                 | 8.34753e-13 | 1.000000 | 8.34753e-13 | 1.000000 |
| Benzene+cycloprop-2-enylidene | 5.28015e-13 | 1.000000 | 5.28015e-13 | 1.000000 |
| rad43                         | 3.32192e-13 | 1.000000 | 3.32192e-13 | 1.000000 |
| rad54                         | 2.68126e-13 | 1.000000 | 2.68126e-13 | 1.000000 |
| rad6                          | 9.93522e-14 | 1.000000 | 9.93522e-14 | 1.000000 |
| rad62                         | 7.16500e-14 | 1.000000 | 7.16500e-14 | 1.000000 |
| rad50                         | 5.30268e-14 | 1.000000 | 5.30268e-14 | 1.000000 |
| rad70                         | 4.45669e-15 | 1.000000 | 4.45669e-15 | 1.000000 |



|                               |             |         |             |         |
|-------------------------------|-------------|---------|-------------|---------|
| rad55                         | 1.95937e-15 | 1.00000 | 1.95937e-15 | 1.00000 |
| PAH1+H                        | 9.15584e-16 | 1.00000 | 9.15584e-16 | 1.00000 |
| Phenyl+cycC3H4                | 7.87809e-16 | 1.00000 | 0.00000     | 1.00000 |
| rad52                         | 3.53720e-16 | 1.00000 | 3.53720e-16 | 1.00000 |
| rad58                         | 1.11814e-16 | 1.00000 | 1.11814e-16 | 1.00000 |
| rad51                         | 9.15666e-17 | 1.00000 | 9.15666e-17 | 1.00000 |
| rad28                         | 8.98122e-17 | 1.00000 | 8.98122e-17 | 1.00000 |
| rad2                          | 7.67399e-17 | 1.00000 | 7.67399e-17 | 1.00000 |
| rad34                         | 4.82176e-17 | 1.00000 | 4.82176e-17 | 1.00000 |
| rad26                         | 1.26004e-17 | 1.00000 | 1.26004e-17 | 1.00000 |
| rad7                          | 9.13712e-18 | 1.00000 | 9.13712e-18 | 1.00000 |
| rad41                         | 5.94061e-18 | 1.00000 | 5.94061e-18 | 1.00000 |
| rad42                         | 5.61022e-18 | 1.00000 | 5.61022e-18 | 1.00000 |
| rad1                          | 4.88448e-18 | 1.00000 | 4.88448e-18 | 1.00000 |
| rad10                         | 4.30933e-18 | 1.00000 | 4.30933e-18 | 1.00000 |
| rad11                         | 2.35682e-18 | 1.00000 | 2.35682e-18 | 1.00000 |
| rad65                         | 1.86103e-18 | 1.00000 | 1.86103e-18 | 1.00000 |
| rad3                          | 5.21418e-19 | 1.00000 | 5.21418e-19 | 1.00000 |
| rad4                          | 2.63786e-19 | 1.00000 | 2.63786e-19 | 1.00000 |
| PhcycC3H3_B+H                 | 2.38340e-19 | 1.00000 | 2.38340e-19 | 1.00000 |
| rad13                         | 4.01045e-20 | 1.00000 | 4.01045e-20 | 1.00000 |
| rad23                         | 3.08844e-22 | 1.00000 | 3.08844e-22 | 1.00000 |
| rad33                         | 7.50468e-23 | 1.00000 | 7.50468e-23 | 1.00000 |
| rad9                          | 5.89198e-23 | 1.00000 | 5.89198e-23 | 1.00000 |
| rad14                         | 4.70371e-23 | 1.00000 | 4.70371e-23 | 1.00000 |
| rad27                         | 4.30903e-23 | 1.00000 | 4.30903e-23 | 1.00000 |
| rad25                         | 2.70108e-23 | 1.00000 | 2.70108e-23 | 1.00000 |
| Benzene+cycloprop-1-enylidene | 1.03290e-23 | 1.00000 | 1.03290e-23 | 1.00000 |
| rad53                         | 5.78352e-24 | 1.00000 | 5.78352e-24 | 1.00000 |
| rad45                         | 3.76647e-24 | 1.00000 | 3.76647e-24 | 1.00000 |
| rad36                         | 2.30631e-25 | 1.00000 | 2.30631e-25 | 1.00000 |
| rad22                         | 1.55466e-25 | 1.00000 | 1.55466e-25 | 1.00000 |
| rad64                         | 3.63049e-26 | 1.00000 | 3.63049e-26 | 1.00000 |
| rad15                         | 2.64957e-26 | 1.00000 | 2.64957e-26 | 1.00000 |
| rad31                         | 1.44990e-27 | 1.00000 | 1.44990e-27 | 1.00000 |
| rad47                         | 9.86915e-28 | 1.00000 | 9.86915e-28 | 1.00000 |
| rad20                         | 2.28792e-28 | 1.00000 | 2.28792e-28 | 1.00000 |
| rad21                         | 1.67223e-28 | 1.00000 | 1.67223e-28 | 1.00000 |
| rad5                          | 3.49061e-29 | 1.00000 | 3.49061e-29 | 1.00000 |
| rad18                         | 3.75799e-30 | 1.00000 | 3.75799e-30 | 1.00000 |
| rad12                         | 2.80774e-31 | 1.00000 | 2.80774e-31 | 1.00000 |
| rad19anti                     | 1.53730e-31 | 1.00000 | 1.53730e-31 | 1.00000 |
| rad61                         | 5.79669e-32 | 1.00000 | 5.79669e-32 | 1.00000 |
| rad24                         | 4.43750e-32 | 1.00000 | 4.43750e-32 | 1.00000 |
| rad56                         | 3.35204e-35 | 1.00000 | 3.35204e-35 | 1.00000 |
| rad68syn                      | 9.07200e-38 | 1.00000 | 9.07200e-38 | 1.00000 |
| rad68anti                     | 7.73484e-38 | 1.00000 | 7.73484e-38 | 1.00000 |
| rad19syn                      | 3.07655e-41 | 1.00000 | 3.07655e-41 | 1.00000 |
| rad73                         | 1.07782e-45 | 1.00000 | 1.07782e-45 | 1.00000 |
| rad40syn                      | 2.93081e-46 | 1.00000 | 2.93081e-46 | 1.00000 |
| rad40anti                     | 2.40043e-46 | 1.00000 | 2.40043e-46 | 1.00000 |
| PAH8+H                        | 1.72178e-50 | 1.00000 | 1.72178e-50 | 1.00000 |
| rad71                         | 3.72768e-54 | 1.00000 | 3.72768e-54 | 1.00000 |
| rad8                          | 1.07856e-61 | 1.00000 | 1.07856e-61 | 1.00000 |

0.100000000E-01 Pa, 80.0000000 K

| Rate constant             | True (fraction)        | Effective (fraction)   |
|---------------------------|------------------------|------------------------|
| Total                     | 4.17084e-16 (1.00 )    | 4.17084e-16 (1.00 )    |
| Formation of rad19        | 4.17084e-16 (1.000 )   | 4.17084e-16 (1.000 )   |
| H-abstraction to cyc2enyl | 8.98751e-27 (2.15e-11) | 8.98751e-27 (2.15e-11) |
| H-abstraction to cyc1enyl | 4.00120e-36 (9.59e-21) | 4.00120e-36 (9.59e-21) |

  

| species    | PYtrue      | Cumul    | PYeffective | Cumul    |
|------------|-------------|----------|-------------|----------|
| Indene+H   | 0.999747    | 0.999747 | 0.999747    | 0.999747 |
| PhCHCCH2+H | 0.000240249 | 0.999987 | 0.000240249 | 0.999987 |
| PhCCH+CH3  | 4.18440e-06 | 0.999991 | 4.18440e-06 | 0.999991 |
| C2H2+PhCH2 | 3.02951e-06 | 0.999994 | 3.02951e-06 | 0.999994 |
| PhCCCH3+H  | 2.37703e-06 | 0.999997 | 2.37703e-06 | 0.999997 |
| Ph+MeAc    | 1.80044e-06 | 0.999999 | 1.80044e-06 | 0.999999 |
| rad67      | 5.42325e-07 | 0.999999 | 5.42325e-07 | 0.999999 |
| rad35      | 2.38839e-07 | 0.999999 | 2.38839e-07 | 0.999999 |
| Ph+Allene  | 1.62897e-07 | 1.000000 | 1.62897e-07 | 1.000000 |
| PAH7+H     | 2.10089e-08 | 1.000000 | 2.10089e-08 | 1.000000 |
| PhCH2CCH+H | 2.03971e-08 | 1.000000 | 2.03971e-08 | 1.000000 |
| rad39      | 5.92724e-09 | 1.000000 | 5.92724e-09 | 1.000000 |
| rad37      | 5.52610e-09 | 1.000000 | 5.52610e-09 | 1.000000 |
| rad30      | 4.47634e-09 | 1.000000 | 4.47634e-09 | 1.000000 |

|                               |             |          |             |          |
|-------------------------------|-------------|----------|-------------|----------|
| PAH9+H                        | 3.01831e-10 | 1.000000 | 3.01831e-10 | 1.000000 |
| rad38                         | 1.29208e-10 | 1.000000 | 1.29208e-10 | 1.000000 |
| Benzene+cycloprop-2-enylidene | 2.15484e-11 | 1.000000 | 2.15484e-11 | 1.000000 |
| rad60syn                      | 2.04569e-11 | 1.000000 | 2.04569e-11 | 1.000000 |
| rad60anti                     | 1.00339e-11 | 1.000000 | 1.00339e-11 | 1.000000 |
| PAH3+H                        | 8.67671e-12 | 1.000000 | 8.67671e-12 | 1.000000 |
| PAH10+CH3                     | 7.93518e-12 | 1.000000 | 7.93518e-12 | 1.000000 |
| rad46                         | 7.86879e-12 | 1.000000 | 7.86879e-12 | 1.000000 |
| rad59                         | 1.78274e-12 | 1.000000 | 1.78274e-12 | 1.000000 |
| PhcycC3H3_A+H                 | 1.01044e-12 | 1.000000 | 1.01044e-12 | 1.000000 |
| rad43                         | 3.56735e-13 | 1.000000 | 3.56735e-13 | 1.000000 |
| rad54                         | 2.90810e-13 | 1.000000 | 2.90810e-13 | 1.000000 |
| rad62                         | 7.71586e-14 | 1.000000 | 7.71586e-14 | 1.000000 |
| rad50                         | 5.67381e-14 | 1.000000 | 5.67381e-14 | 1.000000 |
| rad6                          | 4.37962e-14 | 1.000000 | 4.37962e-14 | 1.000000 |
| rad70                         | 4.95512e-15 | 1.000000 | 4.95512e-15 | 1.000000 |
| rad55                         | 2.18104e-15 | 1.000000 | 2.18104e-15 | 1.000000 |
| Phenyl+cycC3H4                | 1.32430e-15 | 1.000000 | 0.00000     | 1.000000 |
| PAH1+H                        | 1.05930e-15 | 1.000000 | 1.05930e-15 | 1.000000 |
| rad52                         | 3.84632e-16 | 1.000000 | 3.84632e-16 | 1.000000 |
| rad58                         | 1.25392e-16 | 1.000000 | 1.25392e-16 | 1.000000 |
| rad51                         | 1.01545e-16 | 1.000000 | 1.01545e-16 | 1.000000 |
| rad34                         | 5.59620e-17 | 1.000000 | 5.59620e-17 | 1.000000 |
| rad28                         | 3.93878e-17 | 1.000000 | 3.93878e-17 | 1.000000 |
| rad2                          | 3.32595e-17 | 1.000000 | 3.32595e-17 | 1.000000 |
| rad41                         | 7.31627e-18 | 1.000000 | 7.31627e-18 | 1.000000 |
| rad42                         | 6.71573e-18 | 1.000000 | 6.71573e-18 | 1.000000 |
| rad26                         | 5.50924e-18 | 1.000000 | 5.50924e-18 | 1.000000 |
| rad7                          | 3.97855e-18 | 1.000000 | 3.97855e-18 | 1.000000 |
| rad1                          | 2.12255e-18 | 1.000000 | 2.12255e-18 | 1.000000 |
| rad65                         | 2.08431e-18 | 1.000000 | 2.08431e-18 | 1.000000 |
| PhcycC3H3_B+H                 | 1.96139e-18 | 1.000000 | 1.96139e-18 | 1.000000 |
| rad10                         | 1.85785e-18 | 1.000000 | 1.85785e-18 | 1.000000 |
| rad11                         | 1.02292e-18 | 1.000000 | 1.02292e-18 | 1.000000 |
| rad3                          | 2.24778e-19 | 1.000000 | 2.24778e-19 | 1.000000 |
| rad4                          | 1.13785e-19 | 1.000000 | 1.13785e-19 | 1.000000 |
| rad13                         | 1.77015e-20 | 1.000000 | 1.77015e-20 | 1.000000 |
| Benzene+cycloprop-1-enylidene | 9.59328e-21 | 1.000000 | 9.59328e-21 | 1.000000 |
| rad23                         | 9.64614e-23 | 1.000000 | 9.64614e-23 | 1.000000 |
| rad53                         | 4.21155e-23 | 1.000000 | 4.21155e-23 | 1.000000 |
| rad33                         | 3.31796e-23 | 1.000000 | 3.31796e-23 | 1.000000 |
| rad9                          | 3.13311e-23 | 1.000000 | 3.13311e-23 | 1.000000 |
| rad14                         | 2.05050e-23 | 1.000000 | 2.05050e-23 | 1.000000 |
| rad27                         | 1.87140e-23 | 1.000000 | 1.87140e-23 | 1.000000 |
| rad25                         | 1.19262e-23 | 1.000000 | 1.19262e-23 | 1.000000 |
| rad45                         | 1.15505e-24 | 1.000000 | 1.15505e-24 | 1.000000 |
| rad64                         | 5.15518e-25 | 1.000000 | 5.15518e-25 | 1.000000 |
| rad36                         | 7.07130e-26 | 1.000000 | 7.07130e-26 | 1.000000 |
| rad22                         | 4.78180e-26 | 1.000000 | 4.78180e-26 | 1.000000 |
| rad15                         | 1.40331e-26 | 1.000000 | 1.40331e-26 | 1.000000 |
| rad47                         | 8.70888e-28 | 1.000000 | 8.70888e-28 | 1.000000 |
| rad31                         | 6.39524e-28 | 1.000000 | 6.39524e-28 | 1.000000 |
| rad20                         | 1.04174e-28 | 1.000000 | 1.04174e-28 | 1.000000 |
| rad21                         | 7.63575e-29 | 1.000000 | 7.63575e-29 | 1.000000 |
| rad5                          | 2.13500e-29 | 1.000000 | 2.13500e-29 | 1.000000 |
| rad61                         | 8.43878e-30 | 1.000000 | 8.43878e-30 | 1.000000 |
| rad18                         | 1.53694e-30 | 1.000000 | 1.53694e-30 | 1.000000 |
| rad19anti                     | 1.87446e-31 | 1.000000 | 1.87446e-31 | 1.000000 |
| rad12                         | 1.50074e-31 | 1.000000 | 1.50074e-31 | 1.000000 |
| rad24                         | 1.39073e-32 | 1.000000 | 1.39073e-32 | 1.000000 |
| rad56                         | 1.35122e-32 | 1.000000 | 1.35122e-32 | 1.000000 |
| rad68syn                      | 1.91253e-34 | 1.000000 | 1.91253e-34 | 1.000000 |
| rad68anti                     | 1.61066e-34 | 1.000000 | 1.61066e-34 | 1.000000 |
| rad19syn                      | 5.56519e-41 | 1.000000 | 5.56519e-41 | 1.000000 |
| rad73                         | 1.06570e-43 | 1.000000 | 1.06570e-43 | 1.000000 |
| rad40syn                      | 2.31526e-44 | 1.000000 | 2.31526e-44 | 1.000000 |
| rad40anti                     | 1.88869e-44 | 1.000000 | 1.88869e-44 | 1.000000 |
| PAH8+H                        | 1.58589e-48 | 1.000000 | 1.58589e-48 | 1.000000 |
| rad71                         | 4.07739e-52 | 1.000000 | 4.07739e-52 | 1.000000 |
| rad8                          | 1.29465e-61 | 1.000000 | 1.29465e-61 | 1.000000 |

0.100000000E-01 Pa, 90.0000000 K

| Rate constant             | True (fraction)        | Effective (fraction)   |
|---------------------------|------------------------|------------------------|
| Total                     | 7.74016e-16 (1.00 )    | 7.74016e-16 (1.00 )    |
| Formation of rad19        | 7.74016e-16 (1.000 )   | 7.74016e-16 (1.000 )   |
| H-abstraction to cyc2enyl | 2.91736e-25 (3.77e-10) | 2.91736e-25 (3.77e-10) |
| H-abstraction to cyclenyl | 1.47814e-33 (1.91e-18) | 1.47814e-33 (1.91e-18) |

| species                       | PYtrue      | Cumul    | PYeffective | Cumul    |
|-------------------------------|-------------|----------|-------------|----------|
| Indene+H                      | 0.999741    | 0.999741 | 0.999741    | 0.999741 |
| PhCHCCH2+H                    | 0.000245907 | 0.999987 | 0.000245907 | 0.999987 |
| PhCCH+CH3                     | 4.29144e-06 | 0.999991 | 4.29144e-06 | 0.999991 |
| C2H2+PhCH2                    | 3.12303e-06 | 0.999994 | 3.12303e-06 | 0.999994 |
| PhCCCH3+H                     | 2.44384e-06 | 0.999997 | 2.44384e-06 | 0.999997 |
| Ph+MeAc                       | 1.86238e-06 | 0.999999 | 1.86238e-06 | 0.999999 |
| rad67                         | 5.60003e-07 | 0.999999 | 5.60003e-07 | 0.999999 |
| rad35                         | 2.46300e-07 | 0.999999 | 2.46300e-07 | 0.999999 |
| Ph+Allene                     | 1.70568e-07 | 1.000000 | 1.70568e-07 | 1.000000 |
| PAH7+H                        | 2.18534e-08 | 1.000000 | 2.18534e-08 | 1.000000 |
| PhCH2CCH+H                    | 2.15173e-08 | 1.000000 | 2.15173e-08 | 1.000000 |
| rad39                         | 6.16608e-09 | 1.000000 | 6.16608e-09 | 1.000000 |
| rad37                         | 5.75880e-09 | 1.000000 | 5.75880e-09 | 1.000000 |
| rad30                         | 4.61977e-09 | 1.000000 | 4.61977e-09 | 1.000000 |
| Benzene+cycloprop-2-enylidene | 3.76912e-10 | 1.000000 | 3.76912e-10 | 1.000000 |
| PAH9+H                        | 3.14532e-10 | 1.000000 | 3.14532e-10 | 1.000000 |
| rad38                         | 1.35178e-10 | 1.000000 | 1.35178e-10 | 1.000000 |
| rad60syn                      | 2.13805e-11 | 1.000000 | 2.13805e-11 | 1.000000 |
| rad60anti                     | 1.04987e-11 | 1.000000 | 1.04987e-11 | 1.000000 |
| PAH3+H                        | 9.21271e-12 | 1.000000 | 9.21271e-12 | 1.000000 |
| PAH10+CH3                     | 8.63789e-12 | 1.000000 | 8.63789e-12 | 1.000000 |
| rad46                         | 8.26133e-12 | 1.000000 | 8.26133e-12 | 1.000000 |
| rad59                         | 1.88837e-12 | 1.000000 | 1.88837e-12 | 1.000000 |
| PhcycC3H3_A+H                 | 1.23228e-12 | 1.000000 | 1.23228e-12 | 1.000000 |
| rad43                         | 3.84534e-13 | 1.000000 | 3.84534e-13 | 1.000000 |
| rad54                         | 3.16671e-13 | 1.000000 | 3.16671e-13 | 1.000000 |
| rad62                         | 8.34016e-14 | 1.000000 | 8.34016e-14 | 1.000000 |
| rad50                         | 6.09253e-14 | 1.000000 | 6.09253e-14 | 1.000000 |
| rad6                          | 2.15080e-14 | 1.000000 | 2.15080e-14 | 1.000000 |
| rad70                         | 5.53923e-15 | 1.000000 | 5.53923e-15 | 1.000000 |
| rad55                         | 2.44062e-15 | 1.000000 | 2.44062e-15 | 1.000000 |
| Phenyl+cycC3H4                | 2.14284e-15 | 1.000000 | 0.00000     | 1.000000 |
| PAH1+H                        | 1.23481e-15 | 1.000000 | 1.23481e-15 | 1.000000 |
| rad52                         | 4.20160e-16 | 1.000000 | 4.20160e-16 | 1.000000 |
| rad58                         | 1.41551e-16 | 1.000000 | 1.41551e-16 | 1.000000 |
| rad51                         | 1.13271e-16 | 1.000000 | 1.13271e-16 | 1.000000 |
| rad34                         | 6.54349e-17 | 1.000000 | 6.54349e-17 | 1.000000 |
| rad28                         | 1.92650e-17 | 1.000000 | 1.92650e-17 | 1.000000 |
| rad2                          | 1.60993e-17 | 1.000000 | 1.60993e-17 | 1.000000 |
| PhcycC3H3_B+H                 | 1.04002e-17 | 1.000000 | 1.04002e-17 | 1.000000 |
| rad41                         | 9.06540e-18 | 1.000000 | 9.06540e-18 | 1.000000 |
| rad42                         | 8.10276e-18 | 1.000000 | 8.10276e-18 | 1.000000 |
| rad26                         | 2.68677e-18 | 1.000000 | 2.68677e-18 | 1.000000 |
| rad65                         | 2.34935e-18 | 1.000000 | 2.34935e-18 | 1.000000 |
| rad7                          | 1.93407e-18 | 1.000000 | 1.93407e-18 | 1.000000 |
| Benzene+cycloprop-1-enylidene | 1.90970e-18 | 1.000000 | 1.90970e-18 | 1.000000 |
| rad1                          | 1.03044e-18 | 1.000000 | 1.03044e-18 | 1.000000 |
| rad10                         | 8.95397e-19 | 1.000000 | 8.95397e-19 | 1.000000 |
| rad11                         | 4.95990e-19 | 1.000000 | 4.95990e-19 | 1.000000 |
| rad3                          | 1.08343e-19 | 1.000000 | 1.08343e-19 | 1.000000 |
| rad4                          | 5.48821e-20 | 1.000000 | 5.48821e-20 | 1.000000 |
| rad13                         | 8.70744e-21 | 1.000000 | 8.70744e-21 | 1.000000 |
| rad53                         | 2.01557e-22 | 1.000000 | 2.01557e-22 | 1.000000 |
| rad23                         | 3.52327e-23 | 1.000000 | 3.52327e-23 | 1.000000 |
| rad9                          | 1.88968e-23 | 1.000000 | 1.88968e-23 | 1.000000 |
| rad33                         | 1.63466e-23 | 1.000000 | 1.63466e-23 | 1.000000 |
| rad14                         | 9.98410e-24 | 1.000000 | 9.98410e-24 | 1.000000 |
| rad27                         | 9.08041e-24 | 1.000000 | 9.08041e-24 | 1.000000 |
| rad25                         | 5.86891e-24 | 1.000000 | 5.86891e-24 | 1.000000 |
| rad64                         | 4.24307e-24 | 1.000000 | 4.24307e-24 | 1.000000 |
| rad45                         | 4.15506e-25 | 1.000000 | 4.15506e-25 | 1.000000 |
| rad36                         | 2.54364e-26 | 1.000000 | 2.54364e-26 | 1.000000 |
| rad22                         | 1.72569e-26 | 1.000000 | 1.72569e-26 | 1.000000 |
| rad15                         | 8.43916e-27 | 1.000000 | 8.43916e-27 | 1.000000 |
| rad47                         | 7.88401e-28 | 1.000000 | 7.88401e-28 | 1.000000 |
| rad61                         | 4.05951e-28 | 1.000000 | 4.05951e-28 | 1.000000 |
| rad31                         | 3.15799e-28 | 1.000000 | 3.15799e-28 | 1.000000 |
| rad20                         | 5.31944e-29 | 1.000000 | 5.31944e-29 | 1.000000 |
| rad21                         | 3.90952e-29 | 1.000000 | 3.90952e-29 | 1.000000 |
| rad5                          | 1.42090e-29 | 1.000000 | 1.42090e-29 | 1.000000 |
| rad56                         | 1.29221e-30 | 1.000000 | 1.29221e-30 | 1.000000 |
| rad18                         | 7.18630e-31 | 1.000000 | 7.18630e-31 | 1.000000 |
| rad19anti                     | 2.72636e-31 | 1.000000 | 2.72636e-31 | 1.000000 |
| rad12                         | 9.10228e-32 | 1.000000 | 9.10228e-32 | 1.000000 |
| rad68syn                      | 2.86605e-32 | 1.000000 | 2.86605e-32 | 1.000000 |
| rad68anti                     | 2.37876e-32 | 1.000000 | 2.37876e-32 | 1.000000 |
| rad24                         | 5.10190e-33 | 1.000000 | 5.10190e-33 | 1.000000 |
| rad73                         | 1.47494e-39 | 1.000000 | 1.47494e-39 | 1.000000 |

|           |             |          |             |          |
|-----------|-------------|----------|-------------|----------|
| rad19syn  | 1.05530e-40 | 1.000000 | 1.05530e-40 | 1.000000 |
| rad40syn  | 5.30527e-42 | 1.000000 | 5.30527e-42 | 1.000000 |
| rad40anti | 4.30800e-42 | 1.000000 | 4.30800e-42 | 1.000000 |
| PAH8+H    | 4.19687e-46 | 1.000000 | 4.19687e-46 | 1.000000 |
| rad71     | 1.32414e-49 | 1.000000 | 1.32414e-49 | 1.000000 |
| rad8      | 1.63089e-61 | 1.000000 | 1.63089e-61 | 1.000000 |

0.100000000E-01 Pa, 100.000000 K

| Rate constant             | True (fraction)        | Effective (fraction)   |
|---------------------------|------------------------|------------------------|
| Total                     | 1.28255e-15 (1.00 )    | 1.28255e-15 (1.00 )    |
| Formation of rad19        | 1.28255e-15 (1.000 )   | 1.28255e-15 (1.000 )   |
| H-abstraction to cyc2enyl | 4.68359e-24 (3.65e-09) | 4.68359e-24 (3.65e-09) |
| H-abstraction to cyclenyl | 1.66242e-31 (1.30e-16) | 1.66242e-31 (1.30e-16) |

| species                       | PYtrue      | Cumul    | PYeffective | Cumul    |
|-------------------------------|-------------|----------|-------------|----------|
| Indene+H                      | 0.999735    | 0.999735 | 0.999735    | 0.999735 |
| PhCHCCH2+H                    | 0.000251964 | 0.999987 | 0.000251964 | 0.999987 |
| PhCCH+CH3                     | 4.40594e-06 | 0.999991 | 4.40594e-06 | 0.999991 |
| C2H2+PhCH2                    | 3.22383e-06 | 0.999995 | 3.22383e-06 | 0.999995 |
| PhCCCH3+H                     | 2.51564e-06 | 0.999997 | 2.51564e-06 | 0.999997 |
| Ph+MeAc                       | 1.92941e-06 | 0.999999 | 1.92941e-06 | 0.999999 |
| rad67                         | 5.79112e-07 | 1.000000 | 5.79112e-07 | 1.000000 |
| rad35                         | 2.54353e-07 | 1.000000 | 2.54353e-07 | 1.000000 |
| Ph+Allene                     | 1.78975e-07 | 1.000000 | 1.78975e-07 | 1.000000 |
| PAH7+H                        | 2.27716e-08 | 1.000000 | 2.27716e-08 | 1.000000 |
| PhCH2CCH+H                    | 2.27554e-08 | 1.000000 | 2.27554e-08 | 1.000000 |
| rad39                         | 6.42565e-09 | 1.000000 | 6.42565e-09 | 1.000000 |
| rad37                         | 6.01309e-09 | 1.000000 | 6.01309e-09 | 1.000000 |
| rad30                         | 4.77486e-09 | 1.000000 | 4.77486e-09 | 1.000000 |
| Benzene+cycloprop-2-enylidene | 3.65179e-09 | 1.000000 | 3.65179e-09 | 1.000000 |
| PAH9+H                        | 3.28407e-10 | 1.000000 | 3.28407e-10 | 1.000000 |
| rad38                         | 1.41737e-10 | 1.000000 | 1.41737e-10 | 1.000000 |
| rad60syn                      | 2.23943e-11 | 1.000000 | 2.23943e-11 | 1.000000 |
| rad60anti                     | 1.10095e-11 | 1.000000 | 1.10095e-11 | 1.000000 |
| PAH3+H                        | 9.81214e-12 | 1.000000 | 9.81214e-12 | 1.000000 |
| PAH10+CH3                     | 9.44493e-12 | 1.000000 | 9.44493e-12 | 1.000000 |
| rad46                         | 8.69382e-12 | 1.000000 | 8.69382e-12 | 1.000000 |
| rad59                         | 2.00614e-12 | 1.000000 | 2.00614e-12 | 1.000000 |
| PhcycC3H3_A+H                 | 1.51332e-12 | 1.000000 | 1.51332e-12 | 1.000000 |
| rad43                         | 4.16055e-13 | 1.000000 | 4.16055e-13 | 1.000000 |
| rad54                         | 3.46264e-13 | 1.000000 | 3.46264e-13 | 1.000000 |
| rad62                         | 9.04863e-14 | 1.000000 | 9.04863e-14 | 1.000000 |
| rad50                         | 6.56621e-14 | 1.000000 | 6.56621e-14 | 1.000000 |
| rad6                          | 1.14650e-14 | 1.000000 | 1.14650e-14 | 1.000000 |
| rad70                         | 6.22701e-15 | 1.000000 | 6.22701e-15 | 1.000000 |
| Phenyl+cycC3H4                | 3.36905e-15 | 1.000000 | 0.000000    | 1.000000 |
| rad55                         | 2.74619e-15 | 1.000000 | 2.74619e-15 | 1.000000 |
| PAH1+H                        | 1.45048e-15 | 1.000000 | 1.45048e-15 | 1.000000 |
| rad52                         | 4.61146e-16 | 1.000000 | 4.61146e-16 | 1.000000 |
| rad58                         | 1.60858e-16 | 1.000000 | 1.60858e-16 | 1.000000 |
| Benzene+cycloprop-1-enylidene | 1.29619e-16 | 1.000000 | 1.29619e-16 | 1.000000 |
| rad51                         | 1.27117e-16 | 1.000000 | 1.27117e-16 | 1.000000 |
| rad34                         | 7.71006e-17 | 1.000000 | 7.71006e-17 | 1.000000 |
| PhcycC3H3_B+H                 | 4.09122e-17 | 1.000000 | 4.09122e-17 | 1.000000 |
| rad41                         | 1.13033e-17 | 1.000000 | 1.13033e-17 | 1.000000 |
| rad28                         | 1.02360e-17 | 1.000000 | 1.02360e-17 | 1.000000 |
| rad42                         | 9.84909e-18 | 1.000000 | 9.84909e-18 | 1.000000 |
| rad2                          | 8.47513e-18 | 1.000000 | 8.47513e-18 | 1.000000 |
| rad65                         | 2.66569e-18 | 1.000000 | 2.66569e-18 | 1.000000 |
| rad26                         | 1.42361e-18 | 1.000000 | 1.42361e-18 | 1.000000 |
| rad7                          | 1.02216e-18 | 1.000000 | 1.02216e-18 | 1.000000 |
| rad1                          | 5.44202e-19 | 1.000000 | 5.44202e-19 | 1.000000 |
| rad10                         | 4.69645e-19 | 1.000000 | 4.69645e-19 | 1.000000 |
| rad11                         | 2.61587e-19 | 1.000000 | 2.61587e-19 | 1.000000 |
| rad3                          | 5.68384e-20 | 1.000000 | 5.68384e-20 | 1.000000 |
| rad4                          | 2.88146e-20 | 1.000000 | 2.88146e-20 | 1.000000 |
| rad13                         | 4.65053e-21 | 1.000000 | 4.65053e-21 | 1.000000 |
| rad53                         | 7.20046e-22 | 1.000000 | 7.20046e-22 | 1.000000 |
| rad64                         | 2.35959e-23 | 1.000000 | 2.35959e-23 | 1.000000 |
| rad23                         | 1.45055e-23 | 1.000000 | 1.45055e-23 | 1.000000 |
| rad9                          | 1.25523e-23 | 1.000000 | 1.25523e-23 | 1.000000 |
| rad33                         | 8.74358e-24 | 1.000000 | 8.74358e-24 | 1.000000 |
| rad14                         | 5.28691e-24 | 1.000000 | 5.28691e-24 | 1.000000 |
| rad27                         | 4.79300e-24 | 1.000000 | 4.79300e-24 | 1.000000 |
| rad25                         | 3.13589e-24 | 1.000000 | 3.13589e-24 | 1.000000 |
| rad45                         | 1.68868e-25 | 1.000000 | 1.68868e-25 | 1.000000 |
| rad36                         | 1.03390e-26 | 1.000000 | 1.03390e-26 | 1.000000 |

|           |             |         |             |         |
|-----------|-------------|---------|-------------|---------|
| rad61     | 9.04377e-27 | 1.00000 | 9.04377e-27 | 1.00000 |
| rad22     | 7.03756e-27 | 1.00000 | 7.03756e-27 | 1.00000 |
| rad15     | 5.59381e-27 | 1.00000 | 5.59381e-27 | 1.00000 |
| rad47     | 7.28629e-28 | 1.00000 | 7.28629e-28 | 1.00000 |
| rad31     | 1.69995e-28 | 1.00000 | 1.69995e-28 | 1.00000 |
| rad56     | 5.01180e-29 | 1.00000 | 5.01180e-29 | 1.00000 |
| rad20     | 2.96347e-29 | 1.00000 | 2.96347e-29 | 1.00000 |
| rad21     | 2.18369e-29 | 1.00000 | 2.18369e-29 | 1.00000 |
| rad5      | 1.00300e-29 | 1.00000 | 1.00300e-29 | 1.00000 |
| rad68syn  | 1.54856e-30 | 1.00000 | 1.54856e-30 | 1.00000 |
| rad68anti | 1.27158e-30 | 1.00000 | 1.27158e-30 | 1.00000 |
| rad19anti | 4.43518e-31 | 1.00000 | 4.43518e-31 | 1.00000 |
| rad18     | 3.71769e-31 | 1.00000 | 3.71769e-31 | 1.00000 |
| rad12     | 6.08281e-32 | 1.00000 | 6.08281e-32 | 1.00000 |
| rad24     | 2.11126e-33 | 1.00000 | 2.11126e-33 | 1.00000 |
| rad40syn  | 1.99212e-36 | 1.00000 | 1.99212e-36 | 1.00000 |
| rad40anti | 1.51639e-36 | 1.00000 | 1.51639e-36 | 1.00000 |
| rad73     | 7.53494e-37 | 1.00000 | 7.53494e-37 | 1.00000 |
| rad19syn  | 2.08907e-40 | 1.00000 | 2.08907e-40 | 1.00000 |
| PAH8+H    | 2.23051e-43 | 1.00000 | 2.23051e-43 | 1.00000 |
| rad71     | 9.08017e-47 | 1.00000 | 9.08017e-47 | 1.00000 |
| rad8      | 2.13704e-61 | 1.00000 | 2.13704e-61 | 1.00000 |

0.100000000E-01 Pa, 110.00000 K

| Rate constant             | True (fraction)        | Effective (fraction)   |
|---------------------------|------------------------|------------------------|
| Total                     | 1.95524e-15 (1.00 )    | 1.95524e-15 (1.00 )    |
| Formation of rad19        | 1.95524e-15 (1.000 )   | 1.95524e-15 (1.000 )   |
| H-abstraction to cyc2enyl | 4.50936e-23 (2.31e-08) | 4.50936e-23 (2.31e-08) |
| H-abstraction to cyc1enyl | 7.87782e-30 (4.03e-15) | 7.87782e-30 (4.03e-15) |

| species                       | PYtrue      | Cumul    | PYeffective | Cumul    |
|-------------------------------|-------------|----------|-------------|----------|
| Indene+H                      | 0.999728    | 0.999728 | 0.999728    | 0.999728 |
| PhCHCCH2+H                    | 0.000258449 | 0.999986 | 0.000258449 | 0.999986 |
| PhCCH+CH3                     | 4.52844e-06 | 0.999991 | 4.52844e-06 | 0.999991 |
| C2H2+PhCH2                    | 3.33254e-06 | 0.999994 | 3.33254e-06 | 0.999994 |
| PhCCCH3+H                     | 2.59282e-06 | 0.999997 | 2.59282e-06 | 0.999997 |
| Ph+MeAc                       | 2.00199e-06 | 0.999999 | 2.00199e-06 | 0.999999 |
| rad67                         | 5.99778e-07 | 0.999999 | 5.99778e-07 | 0.999999 |
| rad35                         | 2.63050e-07 | 1.000000 | 2.63050e-07 | 1.000000 |
| Ph+Allene                     | 1.88209e-07 | 1.000000 | 1.88209e-07 | 1.000000 |
| PhCH2CCH+H                    | 2.41275e-08 | 1.000000 | 2.41275e-08 | 1.000000 |
| PAH7+H                        | 2.37716e-08 | 1.000000 | 2.37716e-08 | 1.000000 |
| Benzene+cycloprop-2-enylidene | 2.30629e-08 | 1.000000 | 2.30629e-08 | 1.000000 |
| rad39                         | 6.70827e-09 | 1.000000 | 6.70827e-09 | 1.000000 |
| rad37                         | 6.29127e-09 | 1.000000 | 6.29127e-09 | 1.000000 |
| rad30                         | 4.94268e-09 | 1.000000 | 4.94268e-09 | 1.000000 |
| PAH9+H                        | 3.43590e-10 | 1.000000 | 3.43590e-10 | 1.000000 |
| rad38                         | 1.48960e-10 | 1.000000 | 1.48960e-10 | 1.000000 |
| rad60syn                      | 2.35088e-11 | 1.000000 | 2.35088e-11 | 1.000000 |
| rad60anti                     | 1.15720e-11 | 1.000000 | 1.15720e-11 | 1.000000 |
| PAH3+H                        | 1.04842e-11 | 1.000000 | 1.04842e-11 | 1.000000 |
| PAH10+CH3                     | 1.03754e-11 | 1.000000 | 1.03754e-11 | 1.000000 |
| rad46                         | 9.17152e-12 | 1.000000 | 9.17152e-12 | 1.000000 |
| rad59                         | 2.13776e-12 | 1.000000 | 2.13776e-12 | 1.000000 |
| PhcycC3H3_A+H                 | 1.87132e-12 | 1.000000 | 1.87132e-12 | 1.000000 |
| rad43                         | 4.51903e-13 | 1.000000 | 4.51903e-13 | 1.000000 |
| rad54                         | 3.80297e-13 | 1.000000 | 3.80297e-13 | 1.000000 |
| rad62                         | 9.85514e-14 | 1.000000 | 9.85514e-14 | 1.000000 |
| rad50                         | 7.10429e-14 | 1.000000 | 7.10429e-14 | 1.000000 |
| rad70                         | 7.04191e-15 | 1.000000 | 7.04191e-15 | 1.000000 |
| rad6                          | 6.51697e-15 | 1.000000 | 6.51697e-15 | 1.000000 |
| Phenyl+cycC3H4                | 5.18630e-15 | 1.000000 | 0.000000    | 1.000000 |
| Benzene+cycloprop-1-enylidene | 4.02908e-15 | 1.000000 | 4.02908e-15 | 1.000000 |
| rad55                         | 3.10823e-15 | 1.000000 | 3.10823e-15 | 1.000000 |
| PAH1+H                        | 1.71754e-15 | 1.000000 | 1.71754e-15 | 1.000000 |
| rad52                         | 5.08686e-16 | 1.000000 | 5.08686e-16 | 1.000000 |
| rad58                         | 1.84071e-16 | 1.000000 | 1.84071e-16 | 1.000000 |
| rad51                         | 1.43581e-16 | 1.000000 | 1.43581e-16 | 1.000000 |
| PhcycC3H3_B+H                 | 1.30407e-16 | 1.000000 | 1.30407e-16 | 1.000000 |
| rad34                         | 9.15837e-17 | 1.000000 | 9.15837e-17 | 1.000000 |
| rad41                         | 1.41898e-17 | 1.000000 | 1.41898e-17 | 1.000000 |
| rad42                         | 1.20607e-17 | 1.000000 | 1.20607e-17 | 1.000000 |
| rad28                         | 5.80290e-18 | 1.000000 | 5.80290e-18 | 1.000000 |
| rad2                          | 4.76477e-18 | 1.000000 | 4.76477e-18 | 1.000000 |
| rad65                         | 3.04599e-18 | 1.000000 | 3.04599e-18 | 1.000000 |
| rad26                         | 8.04970e-19 | 1.000000 | 8.04970e-19 | 1.000000 |
| rad7                          | 5.76763e-19 | 1.000000 | 5.76763e-19 | 1.000000 |

|           |             |         |             |         |
|-----------|-------------|---------|-------------|---------|
| rad1      | 3.07037e-19 | 1.00000 | 3.07037e-19 | 1.00000 |
| rad10     | 2.63220e-19 | 1.00000 | 2.63220e-19 | 1.00000 |
| rad11     | 1.47349e-19 | 1.00000 | 1.47349e-19 | 1.00000 |
| rad3      | 3.18647e-20 | 1.00000 | 3.18647e-20 | 1.00000 |
| rad4      | 1.61681e-20 | 1.00000 | 1.61681e-20 | 1.00000 |
| rad13     | 2.64918e-21 | 1.00000 | 2.64918e-21 | 1.00000 |
| rad53     | 2.09618e-21 | 1.00000 | 2.09618e-21 | 1.00000 |
| rad64     | 9.90955e-23 | 1.00000 | 9.90955e-23 | 1.00000 |
| rad9      | 9.00442e-24 | 1.00000 | 9.00442e-24 | 1.00000 |
| rad23     | 6.56370e-24 | 1.00000 | 6.56370e-24 | 1.00000 |
| rad33     | 4.98815e-24 | 1.00000 | 4.98815e-24 | 1.00000 |
| rad14     | 2.98978e-24 | 1.00000 | 2.98978e-24 | 1.00000 |
| rad27     | 2.70249e-24 | 1.00000 | 2.70249e-24 | 1.00000 |
| rad25     | 1.78721e-24 | 1.00000 | 1.78721e-24 | 1.00000 |
| rad61     | 1.15959e-25 | 1.00000 | 1.15959e-25 | 1.00000 |
| rad45     | 7.55662e-26 | 1.00000 | 7.55662e-26 | 1.00000 |
| rad36     | 4.62797e-27 | 1.00000 | 4.62797e-27 | 1.00000 |
| rad15     | 4.00657e-27 | 1.00000 | 4.00657e-27 | 1.00000 |
| rad22     | 3.16065e-27 | 1.00000 | 3.16065e-27 | 1.00000 |
| rad56     | 1.00816e-27 | 1.00000 | 1.00816e-27 | 1.00000 |
| rad47     | 6.85283e-28 | 1.00000 | 6.85283e-28 | 1.00000 |
| rad31     | 9.79635e-29 | 1.00000 | 9.79635e-29 | 1.00000 |
| rad68syn  | 4.04387e-29 | 1.00000 | 4.04387e-29 | 1.00000 |
| rad68anti | 3.29421e-29 | 1.00000 | 3.29421e-29 | 1.00000 |
| rad20     | 1.76784e-29 | 1.00000 | 1.76784e-29 | 1.00000 |
| rad21     | 1.30605e-29 | 1.00000 | 1.30605e-29 | 1.00000 |
| rad5      | 7.39565e-30 | 1.00000 | 7.39565e-30 | 1.00000 |
| rad19anti | 7.83710e-31 | 1.00000 | 7.83710e-31 | 1.00000 |
| rad18     | 2.08130e-31 | 1.00000 | 2.08130e-31 | 1.00000 |
| rad12     | 4.39175e-32 | 1.00000 | 4.39175e-32 | 1.00000 |
| rad24     | 9.60876e-34 | 1.00000 | 9.60876e-34 | 1.00000 |
| rad40syn  | 3.23211e-34 | 1.00000 | 3.23211e-34 | 1.00000 |
| rad40anti | 2.54385e-34 | 1.00000 | 2.54385e-34 | 1.00000 |
| rad73     | 5.48229e-35 | 1.00000 | 5.48229e-35 | 1.00000 |
| rad19syn  | 4.31564e-40 | 1.00000 | 4.31564e-40 | 1.00000 |
| PAH8+H    | 1.08818e-40 | 1.00000 | 1.08818e-40 | 1.00000 |
| rad71     | 5.50695e-44 | 1.00000 | 5.50695e-44 | 1.00000 |
| rad8      | 2.89589e-61 | 1.00000 | 2.89589e-61 | 1.00000 |

0.100000000E-01 Pa, 120.000000 K

=====

| Rate constant             | True (fraction)        | Effective (fraction)   |
|---------------------------|------------------------|------------------------|
| Total                     | 2.79817e-15 (1.00 )    | 2.79817e-15 (1.00 )    |
| Formation of rad19        | 2.79817e-15 (1.000 )   | 2.79817e-15 (1.000 )   |
| H-abstraction to cyc2enyl | 2.96039e-22 (1.06e-07) | 2.96039e-22 (1.06e-07) |
| H-abstraction to cyc1enyl | 1.95323e-28 (6.98e-14) | 1.95323e-28 (6.98e-14) |

| species                       | PYtrue      | Cumul    | PYeffective | Cumul    |
|-------------------------------|-------------|----------|-------------|----------|
| Indene+H                      | 0.999721    | 0.999721 | 0.999721    | 0.999721 |
| PhCHCCH2+H                    | 0.000265398 | 0.999986 | 0.000265398 | 0.999986 |
| PhCCH+CH3                     | 4.65964e-06 | 0.999991 | 4.65964e-06 | 0.999991 |
| C2H2+PhCH2                    | 3.45000e-06 | 0.999994 | 3.45000e-06 | 0.999994 |
| PhCCCH3+H                     | 2.67588e-06 | 0.999997 | 2.67588e-06 | 0.999997 |
| Ph+MeAc                       | 2.08071e-06 | 0.999999 | 2.08071e-06 | 0.999999 |
| rad67                         | 6.22166e-07 | 1.000000 | 6.22166e-07 | 1.000000 |
| rad35                         | 2.72456e-07 | 1.00000  | 2.72456e-07 | 1.00000  |
| Ph+Allene                     | 1.98385e-07 | 1.00000  | 1.98385e-07 | 1.00000  |
| Benzene+cycloprop-2-enylidene | 1.05797e-07 | 1.00000  | 1.05797e-07 | 1.00000  |
| PhCH2CCH+H                    | 2.56542e-08 | 1.00000  | 2.56542e-08 | 1.00000  |
| PAH7+H                        | 2.48639e-08 | 1.00000  | 2.48639e-08 | 1.00000  |
| rad39                         | 7.01686e-09 | 1.00000  | 7.01686e-09 | 1.00000  |
| rad37                         | 6.59633e-09 | 1.00000  | 6.59633e-09 | 1.00000  |
| rad30                         | 5.12460e-09 | 1.00000  | 5.12460e-09 | 1.00000  |
| PAH9+H                        | 3.60255e-10 | 1.00000  | 3.60255e-10 | 1.00000  |
| rad38                         | 1.56940e-10 | 1.00000  | 1.56940e-10 | 1.00000  |
| rad60syn                      | 2.47374e-11 | 1.00000  | 2.47374e-11 | 1.00000  |
| rad60anti                     | 1.21929e-11 | 1.00000  | 1.21929e-11 | 1.00000  |
| PAH10+CH3                     | 1.14539e-11 | 1.00000  | 1.14539e-11 | 1.00000  |
| PAH3+H                        | 1.12407e-11 | 1.00000  | 1.12407e-11 | 1.00000  |
| rad46                         | 9.70104e-12 | 1.00000  | 9.70104e-12 | 1.00000  |
| PhcycC3H3_A+H                 | 2.33040e-12 | 1.00000  | 2.33040e-12 | 1.00000  |
| rad59                         | 2.28542e-12 | 1.00000  | 2.28542e-12 | 1.00000  |
| rad43                         | 4.92852e-13 | 1.00000  | 4.92852e-13 | 1.00000  |
| rad54                         | 4.19671e-13 | 1.00000  | 4.19671e-13 | 1.00000  |
| rad62                         | 1.07773e-13 | 1.00000  | 1.07773e-13 | 1.00000  |
| rad50                         | 7.71883e-14 | 1.00000  | 7.71883e-14 | 1.00000  |
| Benzene+cycloprop-1-enylidene | 6.98038e-14 | 1.00000  | 6.98038e-14 | 1.00000  |
| rad70                         | 8.01455e-15 | 1.00000  | 8.01455e-15 | 1.00000  |

|                |             |         |             |         |
|----------------|-------------|---------|-------------|---------|
| Phenyl+cycC3H4 | 7.86468e-15 | 1.00000 | 0.00000     | 1.00000 |
| rad6           | 3.90046e-15 | 1.00000 | 3.90046e-15 | 1.00000 |
| rad55          | 3.54040e-15 | 1.00000 | 3.54040e-15 | 1.00000 |
| PAH1+H         | 2.05120e-15 | 1.00000 | 2.05120e-15 | 1.00000 |
| rad52          | 5.64194e-16 | 1.00000 | 5.64194e-16 | 1.00000 |
| PhcycC3H3_B+H  | 3.56808e-16 | 1.00000 | 3.56808e-16 | 1.00000 |
| rad58          | 2.12192e-16 | 1.00000 | 2.12192e-16 | 1.00000 |
| rad51          | 1.63316e-16 | 1.00000 | 1.63316e-16 | 1.00000 |
| rad34          | 1.09729e-16 | 1.00000 | 1.09729e-16 | 1.00000 |
| rad41          | 1.79463e-17 | 1.00000 | 1.79463e-17 | 1.00000 |
| rad42          | 1.48816e-17 | 1.00000 | 1.48816e-17 | 1.00000 |
| rad65          | 3.50712e-18 | 1.00000 | 3.50712e-18 | 1.00000 |
| rad28          | 3.46545e-18 | 1.00000 | 3.46545e-18 | 1.00000 |
| rad2           | 2.82407e-18 | 1.00000 | 2.82407e-18 | 1.00000 |
| rad26          | 4.79560e-19 | 1.00000 | 4.79560e-19 | 1.00000 |
| rad7           | 3.43000e-19 | 1.00000 | 3.43000e-19 | 1.00000 |
| rad1           | 1.82684e-19 | 1.00000 | 1.82684e-19 | 1.00000 |
| rad10          | 1.55594e-19 | 1.00000 | 1.55594e-19 | 1.00000 |
| rad11          | 8.75040e-20 | 1.00000 | 8.75040e-20 | 1.00000 |
| rad3           | 1.88419e-20 | 1.00000 | 1.88419e-20 | 1.00000 |
| rad4           | 9.56964e-21 | 1.00000 | 9.56964e-21 | 1.00000 |
| rad53          | 5.27722e-21 | 1.00000 | 5.27722e-21 | 1.00000 |
| rad13          | 1.58930e-21 | 1.00000 | 1.58930e-21 | 1.00000 |
| rad64          | 3.39067e-22 | 1.00000 | 3.39067e-22 | 1.00000 |
| rad9           | 6.88107e-24 | 1.00000 | 6.88107e-24 | 1.00000 |
| rad23          | 3.20597e-24 | 1.00000 | 3.20597e-24 | 1.00000 |
| rad33          | 2.99693e-24 | 1.00000 | 2.99693e-24 | 1.00000 |
| rad14          | 1.78235e-24 | 1.00000 | 1.78235e-24 | 1.00000 |
| rad27          | 1.60672e-24 | 1.00000 | 1.60672e-24 | 1.00000 |
| rad25          | 1.07273e-24 | 1.00000 | 1.07273e-24 | 1.00000 |
| rad61          | 9.89040e-25 | 1.00000 | 9.89040e-25 | 1.00000 |
| rad45          | 3.65537e-26 | 1.00000 | 3.65537e-26 | 1.00000 |
| rad56          | 1.24481e-26 | 1.00000 | 1.24481e-26 | 1.00000 |
| rad15          | 3.05850e-27 | 1.00000 | 3.05850e-27 | 1.00000 |
| rad36          | 2.23980e-27 | 1.00000 | 2.23980e-27 | 1.00000 |
| rad22          | 1.53472e-27 | 1.00000 | 1.53472e-27 | 1.00000 |
| rad47          | 6.54537e-28 | 1.00000 | 6.54537e-28 | 1.00000 |
| rad68syn       | 6.16132e-28 | 1.00000 | 6.16132e-28 | 1.00000 |
| rad68anti      | 4.98732e-28 | 1.00000 | 4.98732e-28 | 1.00000 |
| rad31          | 5.96657e-29 | 1.00000 | 5.96657e-29 | 1.00000 |
| rad20          | 1.11439e-29 | 1.00000 | 1.11439e-29 | 1.00000 |
| rad21          | 8.25443e-30 | 1.00000 | 8.25443e-30 | 1.00000 |
| rad5           | 5.64008e-30 | 1.00000 | 5.64008e-30 | 1.00000 |
| rad19anti      | 1.48424e-30 | 1.00000 | 1.48424e-30 | 1.00000 |
| rad18          | 1.24132e-31 | 1.00000 | 1.24132e-31 | 1.00000 |
| rad12          | 3.37924e-32 | 1.00000 | 3.37924e-32 | 1.00000 |
| rad40syn       | 1.64565e-32 | 1.00000 | 1.64565e-32 | 1.00000 |
| rad40anti      | 1.29409e-32 | 1.00000 | 1.29409e-32 | 1.00000 |
| rad73          | 1.92205e-33 | 1.00000 | 1.92205e-33 | 1.00000 |
| rad24          | 4.72339e-34 | 1.00000 | 4.72339e-34 | 1.00000 |
| PAH8+H         | 4.13551e-35 | 1.00000 | 4.13551e-35 | 1.00000 |
| rad71          | 1.32198e-38 | 1.00000 | 1.32198e-38 | 1.00000 |
| rad19syn       | 9.31466e-40 | 1.00000 | 9.31466e-40 | 1.00000 |
| rad8           | 4.04198e-61 | 1.00000 | 4.04198e-61 | 1.00000 |

0.100000000E-01 Pa, 130.000000 K

| Rate constant             | True (fraction)        | Effective (fraction)   |  |  |
|---------------------------|------------------------|------------------------|--|--|
| Total                     | 3.81236e-15 (1.00 )    | 3.81236e-15 (1.00 )    |  |  |
| Formation of rad19        | 3.81236e-15 (1.000 )   | 3.81236e-15 (1.000 )   |  |  |
| H-abstraction to cyc2enyl | 1.44825e-21 (3.80e-07) | 1.44825e-21 (3.80e-07) |  |  |
| H-abstraction to cyclenyl | 2.94348e-27 (7.72e-13) | 2.94348e-27 (7.72e-13) |  |  |

  

| species                       | PYtrue      | Cumul    | PYeffective | Cumul    |
|-------------------------------|-------------|----------|-------------|----------|
| Indene+H                      | 0.999713    | 0.999713 | 0.999713    | 0.999713 |
| PhCHCCH2+H                    | 0.000272863 | 0.999985 | 0.000272863 | 0.999985 |
| PhCCH+CH3                     | 4.80045e-06 | 0.999990 | 4.80045e-06 | 0.999990 |
| C2H2+PhCH2                    | 3.57726e-06 | 0.999994 | 3.57726e-06 | 0.999994 |
| PhCCCH3+H                     | 2.76549e-06 | 0.999997 | 2.76549e-06 | 0.999997 |
| Ph+MeAc                       | 2.16633e-06 | 0.999999 | 2.16633e-06 | 0.999999 |
| rad67                         | 6.46482e-07 | 0.999999 | 6.46482e-07 | 0.999999 |
| Benzene+cycloprop-2-enylidene | 3.79882e-07 | 1.000000 | 3.79882e-07 | 1.000000 |
| rad35                         | 2.82655e-07 | 1.000000 | 2.82655e-07 | 1.000000 |
| Ph+Allene                     | 2.09643e-07 | 1.000000 | 2.09643e-07 | 1.000000 |
| PhCH2CCH+H                    | 2.73605e-08 | 1.000000 | 2.73605e-08 | 1.000000 |
| PAH7+H                        | 2.60611e-08 | 1.000000 | 2.60611e-08 | 1.000000 |
| rad39                         | 7.35495e-09 | 1.000000 | 7.35495e-09 | 1.000000 |
| rad37                         | 6.93193e-09 | 1.000000 | 6.93193e-09 | 1.000000 |

|                               |             |         |             |         |
|-------------------------------|-------------|---------|-------------|---------|
| rad30                         | 5.32235e-09 | 1.00000 | 5.32235e-09 | 1.00000 |
| PAH9+H                        | 3.78613e-10 | 1.00000 | 3.78613e-10 | 1.00000 |
| rad38                         | 1.65793e-10 | 1.00000 | 1.65793e-10 | 1.00000 |
| rad60syn                      | 2.60967e-11 | 1.00000 | 2.60967e-11 | 1.00000 |
| rad60anti                     | 1.28809e-11 | 1.00000 | 1.28809e-11 | 1.00000 |
| PAH10+CH3                     | 1.27119e-11 | 1.00000 | 1.27119e-11 | 1.00000 |
| PAH3+H                        | 1.20963e-11 | 1.00000 | 1.20963e-11 | 1.00000 |
| rad46                         | 1.02905e-11 | 1.00000 | 1.02905e-11 | 1.00000 |
| PhcycC3H3_A+H                 | 2.92345e-12 | 1.00000 | 2.92345e-12 | 1.00000 |
| rad59                         | 2.45181e-12 | 1.00000 | 2.45181e-12 | 1.00000 |
| Benzene+cycloprop-1-enylidene | 7.72089e-13 | 1.00000 | 7.72089e-13 | 1.00000 |
| rad43                         | 5.39874e-13 | 1.00000 | 5.39874e-13 | 1.00000 |
| rad54                         | 4.65528e-13 | 1.00000 | 4.65528e-13 | 1.00000 |
| rad62                         | 1.18372e-13 | 1.00000 | 1.18372e-13 | 1.00000 |
| rad50                         | 8.42501e-14 | 1.00000 | 8.42501e-14 | 1.00000 |
| Phenyl+cycC3H4                | 1.18041e-14 | 1.00000 | 0.00000     | 1.00000 |
| rad70                         | 9.18490e-15 | 1.00000 | 9.18490e-15 | 1.00000 |
| rad55                         | 4.06048e-15 | 1.00000 | 4.06048e-15 | 1.00000 |
| PAH1+H                        | 2.47207e-15 | 1.00000 | 2.47207e-15 | 1.00000 |
| rad6                          | 2.43517e-15 | 1.00000 | 2.43517e-15 | 1.00000 |
| PhcycC3H3_B+H                 | 8.71414e-16 | 1.00000 | 8.71414e-16 | 1.00000 |
| rad52                         | 6.29493e-16 | 1.00000 | 6.29493e-16 | 1.00000 |
| rad58                         | 2.46554e-16 | 1.00000 | 2.46554e-16 | 1.00000 |
| rad51                         | 1.87188e-16 | 1.00000 | 1.87188e-16 | 1.00000 |
| rad34                         | 1.32686e-16 | 1.00000 | 1.32686e-16 | 1.00000 |
| rad41                         | 2.28796e-17 | 1.00000 | 2.28796e-17 | 1.00000 |
| rad42                         | 1.85076e-17 | 1.00000 | 1.85076e-17 | 1.00000 |
| rad65                         | 4.07159e-18 | 1.00000 | 4.07159e-18 | 1.00000 |
| rad28                         | 2.15960e-18 | 1.00000 | 2.15960e-18 | 1.00000 |
| rad2                          | 1.74781e-18 | 1.00000 | 1.74781e-18 | 1.00000 |
| rad26                         | 2.98182e-19 | 1.00000 | 2.98182e-19 | 1.00000 |
| rad7                          | 2.12949e-19 | 1.00000 | 2.12949e-19 | 1.00000 |
| rad1                          | 1.13541e-19 | 1.00000 | 1.13541e-19 | 1.00000 |
| rad10                         | 9.60756e-20 | 1.00000 | 9.60756e-20 | 1.00000 |
| rad11                         | 5.42620e-20 | 1.00000 | 5.42620e-20 | 1.00000 |
| rad53                         | 1.19675e-20 | 1.00000 | 1.19675e-20 | 1.00000 |
| rad3                          | 1.16385e-20 | 1.00000 | 1.16385e-20 | 1.00000 |
| rad4                          | 5.91748e-21 | 1.00000 | 5.91748e-21 | 1.00000 |
| rad64                         | 9.96155e-22 | 1.00000 | 9.96155e-22 | 1.00000 |
| rad13                         | 9.94757e-22 | 1.00000 | 9.94757e-22 | 1.00000 |
| rad61                         | 6.20022e-24 | 1.00000 | 6.20022e-24 | 1.00000 |
| rad9                          | 5.54716e-24 | 1.00000 | 5.54716e-24 | 1.00000 |
| rad33                         | 1.87863e-24 | 1.00000 | 1.87863e-24 | 1.00000 |
| rad23                         | 1.66791e-24 | 1.00000 | 1.66791e-24 | 1.00000 |
| rad14                         | 1.10947e-24 | 1.00000 | 1.10947e-24 | 1.00000 |
| rad27                         | 9.97652e-25 | 1.00000 | 9.97652e-25 | 1.00000 |
| rad25                         | 6.71789e-25 | 1.00000 | 6.71789e-25 | 1.00000 |
| rad56                         | 1.06083e-25 | 1.00000 | 1.06083e-25 | 1.00000 |
| rad45                         | 1.88563e-26 | 1.00000 | 1.88563e-26 | 1.00000 |
| rad68syn                      | 6.23461e-27 | 1.00000 | 6.23461e-27 | 1.00000 |
| rad68anti                     | 5.01915e-27 | 1.00000 | 5.01915e-27 | 1.00000 |
| rad15                         | 2.46390e-27 | 1.00000 | 2.46390e-27 | 1.00000 |
| rad36                         | 1.15622e-27 | 1.00000 | 1.15622e-27 | 1.00000 |
| rad22                         | 7.94806e-28 | 1.00000 | 7.94806e-28 | 1.00000 |
| rad47                         | 6.34015e-28 | 1.00000 | 6.34015e-28 | 1.00000 |
| rad31                         | 3.80487e-29 | 1.00000 | 3.80487e-29 | 1.00000 |
| rad20                         | 7.35108e-30 | 1.00000 | 7.35108e-30 | 1.00000 |
| rad21                         | 5.45952e-30 | 1.00000 | 5.45952e-30 | 1.00000 |
| rad5                          | 4.41820e-30 | 1.00000 | 4.41820e-30 | 1.00000 |
| rad19anti                     | 2.99293e-30 | 1.00000 | 2.99293e-30 | 1.00000 |
| rad40syn                      | 4.43563e-31 | 1.00000 | 4.43563e-31 | 1.00000 |
| rad40anti                     | 3.49231e-31 | 1.00000 | 3.49231e-31 | 1.00000 |
| rad18                         | 7.79715e-32 | 1.00000 | 7.79715e-32 | 1.00000 |
| rad73                         | 3.97093e-32 | 1.00000 | 3.97093e-32 | 1.00000 |
| rad12                         | 2.74409e-32 | 1.00000 | 2.74409e-32 | 1.00000 |
| PAH8+H                        | 2.25784e-33 | 1.00000 | 2.25784e-33 | 1.00000 |
| rad24                         | 2.47457e-34 | 1.00000 | 2.47457e-34 | 1.00000 |
| rad71                         | 1.12225e-36 | 1.00000 | 1.12225e-36 | 1.00000 |
| rad19syn                      | 2.10397e-39 | 1.00000 | 2.10397e-39 | 1.00000 |
| rad8                          | 5.79471e-61 | 1.00000 | 5.79471e-61 | 1.00000 |

0.100000000E-01 Pa, 140.000000 K

| Rate constant             | True (fraction)        | Effective (fraction)   |
|---------------------------|------------------------|------------------------|
| Total                     | 4.99515e-15 (1.00 )    | 4.99515e-15 (1.00 )    |
| Formation of rad19        | 4.99514e-15 (1.000 )   | 4.99514e-15 (1.000 )   |
| H-abstraction to cyc2enyl | 5.62488e-21 (1.13e-06) | 5.62488e-21 (1.13e-06) |
| H-abstraction to cyclenyl | 3.00047e-26 (6.01e-12) | 3.00047e-26 (6.01e-12) |



| species                       | PYtrue      | Cumul    | PYeffective | Cumul    |
|-------------------------------|-------------|----------|-------------|----------|
| Indene+H                      | 0.999703    | 0.999703 | 0.999703    | 0.999703 |
| PhCHCCH2+H                    | 0.000280900 | 0.999984 | 0.000280900 | 0.999984 |
| PhCCH+CH3                     | 4.95191e-06 | 0.999989 | 4.95191e-06 | 0.999989 |
| C2H2+PhCH2                    | 3.71554e-06 | 0.999992 | 3.71554e-06 | 0.999992 |
| PhCCCH3+H                     | 2.86241e-06 | 0.999995 | 2.86241e-06 | 0.999995 |
| Ph+MeAc                       | 2.25972e-06 | 0.999998 | 2.25972e-06 | 0.999998 |
| Benzene+cycloprop-2-enylidene | 1.12607e-06 | 0.999999 | 1.12607e-06 | 0.999999 |
| rad67                         | 6.72971e-07 | 0.999999 | 6.72971e-07 | 0.999999 |
| rad35                         | 2.93748e-07 | 1.000000 | 2.93748e-07 | 1.000000 |
| Ph+Allene                     | 2.22153e-07 | 1.000000 | 2.22153e-07 | 1.000000 |
| PhCH2CCH+H                    | 2.92766e-08 | 1.000000 | 2.92766e-08 | 1.000000 |
| PAH7+H                        | 2.73782e-08 | 1.000000 | 2.73782e-08 | 1.000000 |
| rad39                         | 7.72674e-09 | 1.000000 | 7.72674e-09 | 1.000000 |
| rad37                         | 7.30249e-09 | 1.000000 | 7.30249e-09 | 1.000000 |
| rad30                         | 5.53796e-09 | 1.000000 | 5.53796e-09 | 1.000000 |
| PAH9+H                        | 3.98920e-10 | 1.000000 | 3.98920e-10 | 1.000000 |
| rad38                         | 1.75657e-10 | 1.000000 | 1.75657e-10 | 1.000000 |
| rad60syn                      | 2.76068e-11 | 1.000000 | 2.76068e-11 | 1.000000 |
| PAH10+CH3                     | 1.41890e-11 | 1.000000 | 1.41890e-11 | 1.000000 |
| rad60anti                     | 1.36466e-11 | 1.000000 | 1.36466e-11 | 1.000000 |
| PAH3+H                        | 1.30693e-11 | 1.000000 | 1.30693e-11 | 1.000000 |
| rad46                         | 1.09499e-11 | 1.000000 | 1.09499e-11 | 1.000000 |
| Benzene+cycloprop-1-enylidene | 6.00677e-12 | 1.000000 | 6.00677e-12 | 1.000000 |
| PhcycC3H3_A+H                 | 3.69526e-12 | 1.000000 | 3.69526e-12 | 1.000000 |
| rad59                         | 2.64028e-12 | 1.000000 | 2.64028e-12 | 1.000000 |
| rad43                         | 5.94176e-13 | 1.000000 | 5.94176e-13 | 1.000000 |
| rad54                         | 5.19312e-13 | 1.000000 | 5.19312e-13 | 1.000000 |
| rad62                         | 1.30622e-13 | 1.000000 | 1.30622e-13 | 1.000000 |
| rad50                         | 9.24188e-14 | 1.000000 | 9.24188e-14 | 1.000000 |
| Phenyl+cycC3H4                | 1.75978e-14 | 1.000000 | 0.000000    | 1.000000 |
| rad70                         | 1.06051e-14 | 1.000000 | 1.06051e-14 | 1.000000 |
| rad55                         | 4.69162e-15 | 1.000000 | 4.69162e-15 | 1.000000 |
| PAH1+H                        | 3.00818e-15 | 1.000000 | 3.00818e-15 | 1.000000 |
| PhcycC3H3_B+H                 | 1.95210e-15 | 1.000000 | 1.95210e-15 | 1.000000 |
| rad6                          | 1.57472e-15 | 1.000000 | 1.57472e-15 | 1.000000 |
| rad52                         | 7.06924e-16 | 1.000000 | 7.06924e-16 | 1.000000 |
| rad58                         | 2.88923e-16 | 1.000000 | 2.88923e-16 | 1.000000 |
| rad51                         | 2.16340e-16 | 1.000000 | 2.16340e-16 | 1.000000 |
| rad34                         | 1.62021e-16 | 1.000000 | 1.62021e-16 | 1.000000 |
| rad41                         | 2.94153e-17 | 1.000000 | 2.94153e-17 | 1.000000 |
| rad42                         | 2.32044e-17 | 1.000000 | 2.32044e-17 | 1.000000 |
| rad65                         | 4.76945e-18 | 1.000000 | 4.76945e-18 | 1.000000 |
| rad28                         | 1.39436e-18 | 1.000000 | 1.39436e-18 | 1.000000 |
| rad2                          | 1.12139e-18 | 1.000000 | 1.12139e-18 | 1.000000 |
| rad26                         | 1.92127e-19 | 1.000000 | 1.92127e-19 | 1.000000 |
| rad7                          | 1.37026e-19 | 1.000000 | 1.37026e-19 | 1.000000 |
| rad1                          | 7.31828e-20 | 1.000000 | 7.31828e-20 | 1.000000 |
| rad10                         | 6.15186e-20 | 1.000000 | 6.15186e-20 | 1.000000 |
| rad11                         | 3.48816e-20 | 1.000000 | 3.48816e-20 | 1.000000 |
| rad53                         | 2.51502e-20 | 1.000000 | 2.51502e-20 | 1.000000 |
| rad3                          | 7.45514e-21 | 1.000000 | 7.45514e-21 | 1.000000 |
| rad4                          | 3.79498e-21 | 1.000000 | 3.79498e-21 | 1.000000 |
| rad64                         | 2.60783e-21 | 1.000000 | 2.60783e-21 | 1.000000 |
| rad13                         | 6.45003e-22 | 1.000000 | 6.45003e-22 | 1.000000 |
| rad61                         | 3.06631e-23 | 1.000000 | 3.06631e-23 | 1.000000 |
| rad9                          | 4.68376e-24 | 1.000000 | 4.68376e-24 | 1.000000 |
| rad33                         | 1.21998e-24 | 1.000000 | 1.21998e-24 | 1.000000 |
| rad23                         | 9.14935e-25 | 1.000000 | 9.14935e-25 | 1.000000 |
| rad14                         | 7.15907e-25 | 1.000000 | 7.15907e-25 | 1.000000 |
| rad56                         | 6.78571e-25 | 1.000000 | 6.78571e-25 | 1.000000 |
| rad27                         | 6.42288e-25 | 1.000000 | 6.42288e-25 | 1.000000 |
| rad25                         | 4.35834e-25 | 1.000000 | 4.35834e-25 | 1.000000 |
| rad68syn                      | 4.59528e-26 | 1.000000 | 4.59528e-26 | 1.000000 |
| rad68anti                     | 3.68061e-26 | 1.000000 | 3.68061e-26 | 1.000000 |
| rad45                         | 1.02667e-26 | 1.000000 | 1.02667e-26 | 1.000000 |
| rad15                         | 2.07963e-27 | 1.000000 | 2.07963e-27 | 1.000000 |
| rad36                         | 6.30111e-28 | 1.000000 | 6.30111e-28 | 1.000000 |
| rad47                         | 6.22265e-28 | 1.000000 | 6.22265e-28 | 1.000000 |
| rad22                         | 4.34498e-28 | 1.000000 | 4.34498e-28 | 1.000000 |
| rad31                         | 2.52263e-29 | 1.000000 | 2.52263e-29 | 1.000000 |
| rad40syn                      | 7.53576e-30 | 1.000000 | 7.53576e-30 | 1.000000 |
| rad19anti                     | 6.40255e-30 | 1.000000 | 6.40255e-30 | 1.000000 |
| rad40anti                     | 5.95136e-30 | 1.000000 | 5.95136e-30 | 1.000000 |
| rad20                         | 5.03726e-30 | 1.000000 | 5.03726e-30 | 1.000000 |
| rad21                         | 3.75129e-30 | 1.000000 | 3.75129e-30 | 1.000000 |
| rad5                          | 3.53748e-30 | 1.000000 | 3.53748e-30 | 1.000000 |
| rad73                         | 5.47338e-31 | 1.000000 | 5.47338e-31 | 1.000000 |
| PAH8+H                        | 6.68040e-32 | 1.000000 | 6.68040e-32 | 1.000000 |

|          |             |          |             |          |
|----------|-------------|----------|-------------|----------|
| rad18    | 5.11368e-32 | 1.000000 | 5.11368e-32 | 1.000000 |
| rad12    | 2.33495e-32 | 1.000000 | 2.33495e-32 | 1.000000 |
| rad24    | 1.36777e-34 | 1.000000 | 1.36777e-34 | 1.000000 |
| rad71    | 4.16759e-35 | 1.000000 | 4.16759e-35 | 1.000000 |
| rad19syn | 4.98180e-39 | 1.000000 | 4.98180e-39 | 1.000000 |
| rad8     | 8.51577e-61 | 1.000000 | 8.51577e-61 | 1.000000 |

0.100000000E-01 Pa, 150.000000 K

| =====                     |                 |            |                      |            |
|---------------------------|-----------------|------------|----------------------|------------|
| Rate constant             | True (fraction) |            | Effective (fraction) |            |
| -----                     |                 |            |                      |            |
| Total                     | 6.34137e-15     | (1.00 )    | 6.34137e-15          | (1.00 )    |
| Formation of rad19        | 6.34135e-15     | (1.000 )   | 6.34135e-15          | (1.000 )   |
| H-abstraction to cyc2enyl | 1.81685e-20     | (2.87e-06) | 1.81685e-20          | (2.87e-06) |
| H-abstraction to cyclenyl | 2.23765e-25     | (3.53e-11) | 2.23765e-25          | (3.53e-11) |

| species                       | PYtrue      | Cumul    | PYeffective | Cumul    |
|-------------------------------|-------------|----------|-------------|----------|
| -----                         |             |          |             |          |
| Indene+H                      | 0.999692    | 0.999692 | 0.999692    | 0.999692 |
| PhCHCCH2+H                    | 0.000289576 | 0.999982 | 0.000289576 | 0.999982 |
| PhCCH+CH3                     | 5.11527e-06 | 0.999987 | 5.11527e-06 | 0.999987 |
| C2H2+PhCH2                    | 3.86625e-06 | 0.999991 | 3.86625e-06 | 0.999991 |
| PhCCCH3+H                     | 2.96752e-06 | 0.999994 | 2.96752e-06 | 0.999994 |
| Benzene+cycloprop-2-enylidene | 2.86508e-06 | 0.999997 | 2.86508e-06 | 0.999997 |
| Ph+MeAc                       | 2.36192e-06 | 0.999999 | 2.36192e-06 | 0.999999 |
| rad67                         | 7.01918e-07 | 1.000000 | 7.01918e-07 | 1.000000 |
| rad35                         | 3.05847e-07 | 1.000000 | 3.05847e-07 | 1.000000 |
| Ph+Allene                     | 2.36113e-07 | 1.000000 | 2.36113e-07 | 1.000000 |
| PhCH2CCH+H                    | 3.14389e-08 | 1.000000 | 3.14389e-08 | 1.000000 |
| PAH7+H                        | 2.88329e-08 | 1.000000 | 2.88329e-08 | 1.000000 |
| rad39                         | 8.13716e-09 | 1.000000 | 8.13716e-09 | 1.000000 |
| rad37                         | 7.71323e-09 | 1.000000 | 7.71323e-09 | 1.000000 |
| rad30                         | 5.77382e-09 | 1.000000 | 5.77382e-09 | 1.000000 |
| PAH9+H                        | 4.21477e-10 | 1.000000 | 4.21477e-10 | 1.000000 |
| rad38                         | 1.86700e-10 | 1.000000 | 1.86700e-10 | 1.000000 |
| Benzene+cycloprop-1-enylidene | 3.52865e-11 | 1.000000 | 3.52865e-11 | 1.000000 |
| rad60syn                      | 2.92915e-11 | 1.000000 | 2.92915e-11 | 1.000000 |
| PAH10+CH3                     | 1.59354e-11 | 1.000000 | 1.59354e-11 | 1.000000 |
| rad60anti                     | 1.45022e-11 | 1.000000 | 1.45022e-11 | 1.000000 |
| PAH3+H                        | 1.41817e-11 | 1.000000 | 1.41817e-11 | 1.000000 |
| rad46                         | 1.16909e-11 | 1.000000 | 1.16909e-11 | 1.000000 |
| PhcycC3H3_A+H                 | 4.70677e-12 | 1.000000 | 4.70677e-12 | 1.000000 |
| rad59                         | 2.85489e-12 | 1.000000 | 2.85489e-12 | 1.000000 |
| rad43                         | 6.57254e-13 | 1.000000 | 6.57254e-13 | 1.000000 |
| rad54                         | 5.82844e-13 | 1.000000 | 5.82844e-13 | 1.000000 |
| rad62                         | 1.44861e-13 | 1.000000 | 1.44861e-13 | 1.000000 |
| rad50                         | 1.01933e-13 | 1.000000 | 1.01933e-13 | 1.000000 |
| Phenyl+cycC3H4                | 2.61242e-14 | 1.000000 | 0.000000    | 1.000000 |
| rad70                         | 1.23431e-14 | 1.000000 | 1.23431e-14 | 1.000000 |
| rad55                         | 5.46397e-15 | 1.000000 | 5.46397e-15 | 1.000000 |
| PhcycC3H3_B+H                 | 4.08979e-15 | 1.000000 | 4.08979e-15 | 1.000000 |
| PAH1+H                        | 3.69764e-15 | 1.000000 | 3.69764e-15 | 1.000000 |
| rad6                          | 1.04894e-15 | 1.000000 | 1.04894e-15 | 1.000000 |
| rad52                         | 7.99496e-16 | 1.000000 | 7.99496e-16 | 1.000000 |
| rad58                         | 3.41640e-16 | 1.000000 | 3.41640e-16 | 1.000000 |
| rad51                         | 2.52284e-16 | 1.000000 | 2.52284e-16 | 1.000000 |
| rad34                         | 1.99870e-16 | 1.000000 | 1.99870e-16 | 1.000000 |
| rad41                         | 3.81449e-17 | 1.000000 | 3.81449e-17 | 1.000000 |
| rad42                         | 2.93333e-17 | 1.000000 | 2.93333e-17 | 1.000000 |
| rad65                         | 5.64092e-18 | 1.000000 | 5.64092e-18 | 1.000000 |
| rad28                         | 9.27579e-19 | 1.000000 | 9.27579e-19 | 1.000000 |
| rad2                          | 7.41680e-19 | 1.000000 | 7.41680e-19 | 1.000000 |
| rad26                         | 1.27572e-19 | 1.000000 | 1.27572e-19 | 1.000000 |
| rad7                          | 9.08747e-20 | 1.000000 | 9.08747e-20 | 1.000000 |
| rad53                         | 4.99621e-20 | 1.000000 | 4.99621e-20 | 1.000000 |
| rad1                          | 4.86459e-20 | 1.000000 | 4.86459e-20 | 1.000000 |
| rad10                         | 4.06175e-20 | 1.000000 | 4.06175e-20 | 1.000000 |
| rad11                         | 2.31142e-20 | 1.000000 | 2.31142e-20 | 1.000000 |
| rad64                         | 6.24770e-21 | 1.000000 | 6.24770e-21 | 1.000000 |
| rad3                          | 4.92419e-21 | 1.000000 | 4.92419e-21 | 1.000000 |
| rad4                          | 2.50989e-21 | 1.000000 | 2.50989e-21 | 1.000000 |
| rad13                         | 4.30870e-22 | 1.000000 | 4.30870e-22 | 1.000000 |
| rad61                         | 1.25940e-22 | 1.000000 | 1.25940e-22 | 1.000000 |
| rad9                          | 4.12083e-24 | 1.000000 | 4.12083e-24 | 1.000000 |
| rad56                         | 3.46443e-24 | 1.000000 | 3.46443e-24 | 1.000000 |
| rad33                         | 8.16248e-25 | 1.000000 | 8.16248e-25 | 1.000000 |
| rad23                         | 5.25061e-25 | 1.000000 | 5.25061e-25 | 1.000000 |
| rad14                         | 4.76194e-25 | 1.000000 | 4.76194e-25 | 1.000000 |
| rad27                         | 4.26332e-25 | 1.000000 | 4.26332e-25 | 1.000000 |
| rad25                         | 2.91311e-25 | 1.000000 | 2.91311e-25 | 1.000000 |

|           |             |         |             |         |
|-----------|-------------|---------|-------------|---------|
| rad68syn  | 2.63935e-25 | 1.00000 | 2.63935e-25 | 1.00000 |
| rad68anti | 2.10321e-25 | 1.00000 | 2.10321e-25 | 1.00000 |
| rad45     | 5.85306e-27 | 1.00000 | 5.85306e-27 | 1.00000 |
| rad15     | 1.82947e-27 | 1.00000 | 1.82947e-27 | 1.00000 |
| rad47     | 6.18478e-28 | 1.00000 | 6.18478e-28 | 1.00000 |
| rad36     | 3.59653e-28 | 1.00000 | 3.59653e-28 | 1.00000 |
| rad22     | 2.48729e-28 | 1.00000 | 2.48729e-28 | 1.00000 |
| rad40syn  | 8.87918e-29 | 1.00000 | 8.87918e-29 | 1.00000 |
| rad40anti | 7.03940e-29 | 1.00000 | 7.03940e-29 | 1.00000 |
| rad31     | 1.72956e-29 | 1.00000 | 1.72956e-29 | 1.00000 |
| rad19anti | 1.44961e-29 | 1.00000 | 1.44961e-29 | 1.00000 |
| rad73     | 5.47311e-30 | 1.00000 | 5.47311e-30 | 1.00000 |
| rad20     | 3.56536e-30 | 1.00000 | 3.56536e-30 | 1.00000 |
| rad5      | 2.88402e-30 | 1.00000 | 2.88402e-30 | 1.00000 |
| rad21     | 2.66262e-30 | 1.00000 | 2.66262e-30 | 1.00000 |
| PAH8+H    | 1.26368e-30 | 1.00000 | 1.26368e-30 | 1.00000 |
| rad18     | 3.47843e-32 | 1.00000 | 3.47843e-32 | 1.00000 |
| rad12     | 2.07117e-32 | 1.00000 | 2.07117e-32 | 1.00000 |
| rad71     | 9.41467e-34 | 1.00000 | 9.41467e-34 | 1.00000 |
| rad24     | 7.91398e-35 | 1.00000 | 7.91398e-35 | 1.00000 |
| rad19syn  | 1.23836e-38 | 1.00000 | 1.23836e-38 | 1.00000 |
| rad8      | 1.28101e-60 | 1.00000 | 1.28101e-60 | 1.00000 |

0.100000000E-01 Pa, 160.00000 K

| Rate constant             | True (fraction)        | Effective (fraction)   |
|---------------------------|------------------------|------------------------|
| Total                     | 7.84423e-15 (1.00 )    | 7.84423e-15 (1.00 )    |
| Formation of rad19        | 7.84418e-15 (1.000 )   | 7.84418e-15 (1.000 )   |
| H-abstraction to cyc2enyl | 5.05321e-20 (6.44e-06) | 5.05321e-20 (6.44e-06) |
| H-abstraction to cyc1enyl | 1.29479e-24 (1.65e-10) | 1.29479e-24 (1.65e-10) |

| species                       | PYtrue      | Cumul    | PYeffective | Cumul    |
|-------------------------------|-------------|----------|-------------|----------|
| Indene+H                      | 0.999679    | 0.999679 | 0.999679    | 0.999679 |
| PhCHCCH2+H                    | 0.000298966 | 0.999978 | 0.000298966 | 0.999978 |
| Benzene+cycloprop-2-enylidene | 6.44194e-06 | 0.999984 | 6.44194e-06 | 0.999984 |
| PhCCH+CH3                     | 5.29185e-06 | 0.999989 | 5.29185e-06 | 0.999989 |
| C2H2+PhCH2                    | 4.03100e-06 | 0.999993 | 4.03100e-06 | 0.999993 |
| PhCCCH3+H                     | 3.08182e-06 | 0.999996 | 3.08182e-06 | 0.999996 |
| Ph+MeAc                       | 2.47410e-06 | 0.999999 | 2.47410e-06 | 0.999999 |
| rad67                         | 7.33648e-07 | 1.000000 | 7.33648e-07 | 1.000000 |
| rad35                         | 3.19086e-07 | 1.000000 | 3.19086e-07 | 1.000000 |
| Ph+Allene                     | 2.51760e-07 | 1.000000 | 2.51760e-07 | 1.000000 |
| PhCH2CCH+H                    | 3.38911e-08 | 1.000000 | 3.38911e-08 | 1.000000 |
| PAH7+H                        | 3.04455e-08 | 1.000000 | 3.04455e-08 | 1.000000 |
| rad39                         | 8.59185e-09 | 1.000000 | 8.59185e-09 | 1.000000 |
| rad37                         | 8.17020e-09 | 1.000000 | 8.17020e-09 | 1.000000 |
| rad30                         | 6.03268e-09 | 1.000000 | 6.03268e-09 | 1.000000 |
| PAH9+H                        | 4.46634e-10 | 1.000000 | 4.46634e-10 | 1.000000 |
| rad38                         | 1.99121e-10 | 1.000000 | 1.99121e-10 | 1.000000 |
| Benzene+cycloprop-1-enylidene | 1.65062e-10 | 1.000000 | 1.65062e-10 | 1.000000 |
| rad60syn                      | 3.11789e-11 | 1.000000 | 3.11789e-11 | 1.000000 |
| PAH10+CH3                     | 1.80140e-11 | 1.000000 | 1.80140e-11 | 1.000000 |
| rad60anti                     | 1.54624e-11 | 1.000000 | 1.54624e-11 | 1.000000 |
| PAH3+H                        | 1.54605e-11 | 1.000000 | 1.54605e-11 | 1.000000 |
| rad46                         | 1.25276e-11 | 1.000000 | 1.25276e-11 | 1.000000 |
| PhcycC3H3_A+H                 | 6.04075e-12 | 1.000000 | 6.04075e-12 | 1.000000 |
| rad59                         | 3.10053e-12 | 1.000000 | 3.10053e-12 | 1.000000 |
| rad43                         | 7.30941e-13 | 1.000000 | 7.30941e-13 | 1.000000 |
| rad54                         | 6.58409e-13 | 1.000000 | 6.58409e-13 | 1.000000 |
| rad62                         | 1.61502e-13 | 1.000000 | 1.61502e-13 | 1.000000 |
| rad50                         | 1.13086e-13 | 1.000000 | 1.13086e-13 | 1.000000 |
| Phenyl+cycC3H4                | 3.86829e-14 | 1.000000 | 0.000000    | 1.000000 |
| rad70                         | 1.44875e-14 | 1.000000 | 1.44875e-14 | 1.000000 |
| PhcycC3H3_B+H                 | 8.12739e-15 | 1.000000 | 8.12739e-15 | 1.000000 |
| rad55                         | 6.41674e-15 | 1.000000 | 6.41674e-15 | 1.000000 |
| PAH1+H                        | 4.59237e-15 | 1.000000 | 4.59237e-15 | 1.000000 |
| rad52                         | 9.11059e-16 | 1.000000 | 9.11059e-16 | 1.000000 |
| rad6                          | 7.16604e-16 | 1.000000 | 7.16604e-16 | 1.000000 |
| rad58                         | 4.07816e-16 | 1.000000 | 4.07816e-16 | 1.000000 |
| rad51                         | 2.97029e-16 | 1.000000 | 2.97029e-16 | 1.000000 |
| rad34                         | 2.49156e-16 | 1.000000 | 2.49156e-16 | 1.000000 |
| rad41                         | 4.98898e-17 | 1.000000 | 4.98898e-17 | 1.000000 |
| rad42                         | 3.73844e-17 | 1.000000 | 3.73844e-17 | 1.000000 |
| rad65                         | 6.73990e-18 | 1.000000 | 6.73990e-18 | 1.000000 |
| rad28                         | 6.32991e-19 | 1.000000 | 6.32991e-19 | 1.000000 |
| rad2                          | 5.03442e-19 | 1.000000 | 5.03442e-19 | 1.000000 |
| rad53                         | 9.51402e-20 | 1.000000 | 9.51402e-20 | 1.000000 |
| rad26                         | 8.69122e-20 | 1.000000 | 8.69122e-20 | 1.000000 |

|           |             |         |             |         |
|-----------|-------------|---------|-------------|---------|
| rad7      | 6.18406e-20 | 1.00000 | 6.18406e-20 | 1.00000 |
| rad1      | 3.32009e-20 | 1.00000 | 3.32009e-20 | 1.00000 |
| rad10     | 2.75292e-20 | 1.00000 | 2.75292e-20 | 1.00000 |
| rad11     | 1.57186e-20 | 1.00000 | 1.57186e-20 | 1.00000 |
| rad64     | 1.39664e-20 | 1.00000 | 1.39664e-20 | 1.00000 |
| rad3      | 3.33881e-21 | 1.00000 | 3.33881e-21 | 1.00000 |
| rad4      | 1.70427e-21 | 1.00000 | 1.70427e-21 | 1.00000 |
| rad61     | 4.46255e-22 | 1.00000 | 4.46255e-22 | 1.00000 |
| rad13     | 2.95244e-22 | 1.00000 | 2.95244e-22 | 1.00000 |
| rad56     | 1.47801e-23 | 1.00000 | 1.47801e-23 | 1.00000 |
| rad9      | 3.76454e-24 | 1.00000 | 3.76454e-24 | 1.00000 |
| rad68syn  | 1.24235e-24 | 1.00000 | 1.24235e-24 | 1.00000 |
| rad68anti | 9.84690e-25 | 1.00000 | 9.84690e-25 | 1.00000 |
| rad33     | 5.60229e-25 | 1.00000 | 5.60229e-25 | 1.00000 |
| rad14     | 3.25065e-25 | 1.00000 | 3.25065e-25 | 1.00000 |
| rad23     | 3.13297e-25 | 1.00000 | 3.13297e-25 | 1.00000 |
| rad27     | 2.90473e-25 | 1.00000 | 2.90473e-25 | 1.00000 |
| rad25     | 1.99736e-25 | 1.00000 | 1.99736e-25 | 1.00000 |
| rad45     | 3.47215e-27 | 1.00000 | 3.47215e-27 | 1.00000 |
| rad15     | 1.67149e-27 | 1.00000 | 1.67149e-27 | 1.00000 |
| rad40syn  | 7.79728e-28 | 1.00000 | 7.79728e-28 | 1.00000 |
| rad47     | 6.22336e-28 | 1.00000 | 6.22336e-28 | 1.00000 |
| rad40anti | 6.20571e-28 | 1.00000 | 6.20571e-28 | 1.00000 |
| rad36     | 2.13664e-28 | 1.00000 | 2.13664e-28 | 1.00000 |
| rad22     | 1.48164e-28 | 1.00000 | 1.48164e-28 | 1.00000 |
| rad73     | 4.22776e-29 | 1.00000 | 4.22776e-29 | 1.00000 |
| rad19anti | 3.46726e-29 | 1.00000 | 3.46726e-29 | 1.00000 |
| PAH8+H    | 1.68119e-29 | 1.00000 | 1.68119e-29 | 1.00000 |
| rad31     | 1.22121e-29 | 1.00000 | 1.22121e-29 | 1.00000 |
| rad20     | 2.59503e-30 | 1.00000 | 2.59503e-30 | 1.00000 |
| rad5      | 2.38725e-30 | 1.00000 | 2.38725e-30 | 1.00000 |
| rad21     | 1.94363e-30 | 1.00000 | 1.94363e-30 | 1.00000 |
| rad18     | 2.44125e-32 | 1.00000 | 2.44125e-32 | 1.00000 |
| rad12     | 1.90855e-32 | 1.00000 | 1.90855e-32 | 1.00000 |
| rad71     | 1.46085e-32 | 1.00000 | 1.46085e-32 | 1.00000 |
| rad24     | 4.76418e-35 | 1.00000 | 4.76418e-35 | 1.00000 |
| rad19syn  | 3.23538e-38 | 1.00000 | 3.23538e-38 | 1.00000 |
| rad8      | 1.97048e-60 | 1.00000 | 1.97048e-60 | 1.00000 |

0.100000000E-01 Pa, 170.00000 K

=====

| Rate constant             | True (fraction)        | Effective (fraction)   |
|---------------------------|------------------------|------------------------|
| Total                     | 9.49598e-15 (1.00 )    | 9.49598e-15 (1.00 )    |
| Formation of rad19        | 9.49586e-15 (1.000 )   | 9.49586e-15 (1.000 )   |
| H-abstraction to cyc2enyl | 1.24279e-19 (1.31e-05) | 1.24279e-19 (1.31e-05) |
| H-abstraction to cyc1enyl | 6.08025e-24 (6.40e-10) | 6.08025e-24 (6.40e-10) |

| species                       | PYtrue      | Cumul    | PYeffective | Cumul    |
|-------------------------------|-------------|----------|-------------|----------|
| Indene+H                      | 0.999661    | 0.999661 | 0.999661    | 0.999661 |
| PhCHCCH2+H                    | 0.000309152 | 0.999970 | 0.000309152 | 0.999970 |
| Benzene+cycloprop-2-enylidene | 1.30875e-05 | 0.999983 | 1.30875e-05 | 0.999983 |
| PhCCH+CH3                     | 5.48313e-06 | 0.999989 | 5.48313e-06 | 0.999989 |
| C2H2+PhCH2                    | 4.21161e-06 | 0.999993 | 4.21161e-06 | 0.999993 |
| PhCCCH3+H                     | 3.20644e-06 | 0.999996 | 3.20644e-06 | 0.999996 |
| Ph+MeAc                       | 2.59759e-06 | 0.999999 | 2.59759e-06 | 0.999999 |
| rad67                         | 7.68529e-07 | 0.999999 | 7.68529e-07 | 0.999999 |
| rad35                         | 3.33611e-07 | 1.000000 | 3.33611e-07 | 1.000000 |
| Ph+Allene                     | 2.69366e-07 | 1.000000 | 2.69366e-07 | 1.000000 |
| PhCH2CCH+H                    | 3.66842e-08 | 1.000000 | 3.66842e-08 | 1.000000 |
| PAH7+H                        | 3.22393e-08 | 1.000000 | 3.22393e-08 | 1.000000 |
| rad39                         | 9.09732e-09 | 1.000000 | 9.09732e-09 | 1.000000 |
| rad37                         | 8.68039e-09 | 1.000000 | 8.68039e-09 | 1.000000 |
| rad30                         | 6.31760e-09 | 1.000000 | 6.31760e-09 | 1.000000 |
| Benzene+cycloprop-1-enylidene | 6.40297e-10 | 1.000000 | 6.40297e-10 | 1.000000 |
| PAH9+H                        | 4.74804e-10 | 1.000000 | 4.74804e-10 | 1.000000 |
| rad38                         | 2.13149e-10 | 1.000000 | 2.13149e-10 | 1.000000 |
| rad60syn                      | 3.33017e-11 | 1.000000 | 3.33017e-11 | 1.000000 |
| PAH10+CH3                     | 2.05041e-11 | 1.000000 | 2.05041e-11 | 1.000000 |
| PAH3+H                        | 1.69384e-11 | 1.000000 | 1.69384e-11 | 1.000000 |
| rad60anti                     | 1.65445e-11 | 1.000000 | 1.65445e-11 | 1.000000 |
| rad46                         | 1.34769e-11 | 1.000000 | 1.34769e-11 | 1.000000 |
| PhcycC3H3_A+H                 | 7.80954e-12 | 1.000000 | 7.80954e-12 | 1.000000 |
| rad59                         | 3.38309e-12 | 1.000000 | 3.38309e-12 | 1.000000 |
| rad43                         | 8.17483e-13 | 1.000000 | 8.17483e-13 | 1.000000 |
| rad54                         | 7.48874e-13 | 1.000000 | 7.48874e-13 | 1.000000 |
| rad62                         | 1.81051e-13 | 1.000000 | 1.81051e-13 | 1.000000 |
| rad50                         | 1.26248e-13 | 1.000000 | 1.26248e-13 | 1.000000 |
| Phenyl+cycC3H4                | 5.71891e-14 | 1.000000 | 0.000000    | 1.000000 |

|               |             |         |             |         |
|---------------|-------------|---------|-------------|---------|
| rad70         | 1.71538e-14 | 1.00000 | 1.71538e-14 | 1.00000 |
| PhcycC3H3_B+H | 1.54797e-14 | 1.00000 | 1.54797e-14 | 1.00000 |
| rad55         | 7.60095e-15 | 1.00000 | 7.60095e-15 | 1.00000 |
| PAH1+H        | 5.76317e-15 | 1.00000 | 5.76317e-15 | 1.00000 |
| rad52         | 1.04656e-15 | 1.00000 | 1.04656e-15 | 1.00000 |
| rad6          | 5.00366e-16 | 1.00000 | 5.00366e-16 | 1.00000 |
| rad58         | 4.91579e-16 | 1.00000 | 4.91579e-16 | 1.00000 |
| rad51         | 3.53238e-16 | 1.00000 | 3.53238e-16 | 1.00000 |
| rad34         | 3.13877e-16 | 1.00000 | 3.13877e-16 | 1.00000 |
| rad41         | 6.57908e-17 | 1.00000 | 6.57908e-17 | 1.00000 |
| rad42         | 4.80221e-17 | 1.00000 | 4.80221e-17 | 1.00000 |
| rad65         | 8.13875e-18 | 1.00000 | 8.13875e-18 | 1.00000 |
| rad28         | 4.41563e-19 | 1.00000 | 4.41563e-19 | 1.00000 |
| rad2          | 3.49478e-19 | 1.00000 | 3.49478e-19 | 1.00000 |
| rad53         | 1.75381e-19 | 1.00000 | 1.75381e-19 | 1.00000 |
| rad26         | 6.05432e-20 | 1.00000 | 6.05432e-20 | 1.00000 |
| rad7          | 4.30289e-20 | 1.00000 | 4.30289e-20 | 1.00000 |
| rad64         | 2.95519e-20 | 1.00000 | 2.95519e-20 | 1.00000 |
| rad1          | 2.31847e-20 | 1.00000 | 2.31847e-20 | 1.00000 |
| rad10         | 1.90855e-20 | 1.00000 | 1.90855e-20 | 1.00000 |
| rad11         | 1.09311e-20 | 1.00000 | 1.09311e-20 | 1.00000 |
| rad3          | 2.31569e-21 | 1.00000 | 2.31569e-21 | 1.00000 |
| rad61         | 1.40385e-21 | 1.00000 | 1.40385e-21 | 1.00000 |
| rad4          | 1.18389e-21 | 1.00000 | 1.18389e-21 | 1.00000 |
| rad13         | 2.06803e-22 | 1.00000 | 2.06803e-22 | 1.00000 |
| rad56         | 5.45552e-23 | 1.00000 | 5.45552e-23 | 1.00000 |
| rad68syn      | 4.97943e-24 | 1.00000 | 4.97943e-24 | 1.00000 |
| rad68anti     | 3.92401e-24 | 1.00000 | 3.92401e-24 | 1.00000 |
| rad9          | 3.56459e-24 | 1.00000 | 3.56459e-24 | 1.00000 |
| rad33         | 3.93079e-25 | 1.00000 | 3.93079e-25 | 1.00000 |
| rad14         | 2.26926e-25 | 1.00000 | 2.26926e-25 | 1.00000 |
| rad27         | 2.02427e-25 | 1.00000 | 2.02427e-25 | 1.00000 |
| rad23         | 1.93421e-25 | 1.00000 | 1.93421e-25 | 1.00000 |
| rad25         | 1.39994e-25 | 1.00000 | 1.39994e-25 | 1.00000 |
| rad40syn      | 5.38898e-27 | 1.00000 | 5.38898e-27 | 1.00000 |
| rad40anti     | 4.30355e-27 | 1.00000 | 4.30355e-27 | 1.00000 |
| rad45         | 2.13265e-27 | 1.00000 | 2.13265e-27 | 1.00000 |
| rad15         | 1.58322e-27 | 1.00000 | 1.58322e-27 | 1.00000 |
| rad47         | 6.33938e-28 | 1.00000 | 6.33938e-28 | 1.00000 |
| rad73         | 2.64603e-28 | 1.00000 | 2.64603e-28 | 1.00000 |
| PAH8+H        | 1.67762e-28 | 1.00000 | 1.67762e-28 | 1.00000 |
| rad36         | 1.31465e-28 | 1.00000 | 1.31465e-28 | 1.00000 |
| rad22         | 9.13807e-29 | 1.00000 | 9.13807e-29 | 1.00000 |
| rad19anti     | 8.74613e-29 | 1.00000 | 8.74613e-29 | 1.00000 |
| rad31         | 8.85201e-30 | 1.00000 | 8.85201e-30 | 1.00000 |
| rad5          | 2.00165e-30 | 1.00000 | 2.00165e-30 | 1.00000 |
| rad20         | 1.93545e-30 | 1.00000 | 1.93545e-30 | 1.00000 |
| rad21         | 1.45400e-30 | 1.00000 | 1.45400e-30 | 1.00000 |
| rad71         | 1.66875e-31 | 1.00000 | 1.66875e-31 | 1.00000 |
| rad12         | 1.82380e-32 | 1.00000 | 1.82380e-32 | 1.00000 |
| rad18         | 1.76043e-32 | 1.00000 | 1.76043e-32 | 1.00000 |
| rad24         | 2.96958e-35 | 1.00000 | 2.96958e-35 | 1.00000 |
| rad19syn      | 8.89196e-38 | 1.00000 | 8.89196e-38 | 1.00000 |
| rad8          | 3.09729e-60 | 1.00000 | 3.09729e-60 | 1.00000 |

0.100000000E-01 Pa, 180.000000 K

| Rate constant             | True (fraction)        | Effective (fraction)   |  |  |
|---------------------------|------------------------|------------------------|--|--|
| Total                     | 1.12884e-14 (1.00 )    | 1.12884e-14 (1.00 )    |  |  |
| Formation of rad19        | 1.12881e-14 (1.000 )   | 1.12881e-14 (1.000 )   |  |  |
| H-abstraction to cyc2enyl | 2.75916e-19 (2.44e-05) | 2.75916e-19 (2.44e-05) |  |  |
| H-abstraction to cyc1enyl | 2.39955e-23 (2.13e-09) | 2.39955e-23 (2.13e-09) |  |  |

  

| species                       | PYtrue      | Cumul    | PYeffective | Cumul    |
|-------------------------------|-------------|----------|-------------|----------|
| Indene+H                      | 0.999638    | 0.999638 | 0.999638    | 0.999638 |
| PhCHCCH2+H                    | 0.000320224 | 0.999958 | 0.000320224 | 0.999958 |
| Benzene+cycloprop-2-enylidene | 2.44424e-05 | 0.999982 | 2.44424e-05 | 0.999982 |
| PhCCH+CH3                     | 5.69071e-06 | 0.999988 | 5.69071e-06 | 0.999988 |
| C2H2+PhCH2                    | 4.41006e-06 | 0.999992 | 4.41006e-06 | 0.999992 |
| PhCCCH3+H                     | 3.34257e-06 | 0.999996 | 3.34257e-06 | 0.999996 |
| Ph+MeAc                       | 2.73384e-06 | 0.999998 | 2.73384e-06 | 0.999998 |
| rad67                         | 8.06966e-07 | 0.999999 | 8.06966e-07 | 0.999999 |
| rad35                         | 3.49584e-07 | 1.000000 | 3.49584e-07 | 1.000000 |
| Ph+Allene                     | 2.89249e-07 | 1.000000 | 2.89249e-07 | 1.000000 |
| PhCH2CCH+H                    | 3.98790e-08 | 1.000000 | 3.98790e-08 | 1.000000 |
| PAH7+H                        | 3.42407e-08 | 1.000000 | 3.42407e-08 | 1.000000 |
| rad39                         | 9.66090e-09 | 1.000000 | 9.66090e-09 | 1.000000 |
| rad37                         | 9.25180e-09 | 1.000000 | 9.25180e-09 | 1.000000 |

|                               |             |          |             |          |
|-------------------------------|-------------|----------|-------------|----------|
| rad30                         | 6.63204e-09 | 1.000000 | 6.63204e-09 | 1.000000 |
| Benzene+cycloprop-1-enylidene | 2.12567e-09 | 1.000000 | 2.12567e-09 | 1.000000 |
| PAH9+H                        | 5.06455e-10 | 1.000000 | 5.06455e-10 | 1.000000 |
| rad38                         | 2.29060e-10 | 1.000000 | 2.29060e-10 | 1.000000 |
| rad60syn                      | 3.56979e-11 | 1.000000 | 3.56979e-11 | 1.000000 |
| PAH10+CH3                     | 2.35048e-11 | 1.000000 | 2.35048e-11 | 1.000000 |
| PAH3+H                        | 1.86545e-11 | 1.000000 | 1.86545e-11 | 1.000000 |
| rad60anti                     | 1.77684e-11 | 1.000000 | 1.77684e-11 | 1.000000 |
| rad46                         | 1.45581e-11 | 1.000000 | 1.45581e-11 | 1.000000 |
| PhcycC3H3_A+H                 | 1.01653e-11 | 1.000000 | 1.01653e-11 | 1.000000 |
| rad59                         | 3.70962e-12 | 1.000000 | 3.70962e-12 | 1.000000 |
| rad43                         | 9.19621e-13 | 1.000000 | 9.19621e-13 | 1.000000 |
| rad54                         | 8.57837e-13 | 1.000000 | 8.57837e-13 | 1.000000 |
| rad62                         | 2.04120e-13 | 1.000000 | 2.04120e-13 | 1.000000 |
| rad50                         | 1.41875e-13 | 1.000000 | 1.41875e-13 | 1.000000 |
| Phenyl+cycC3H4                | 8.44565e-14 | 1.000000 | 0.00000     | 1.000000 |
| PhcycC3H3_B+H                 | 2.84776e-14 | 1.000000 | 2.84776e-14 | 1.000000 |
| rad70                         | 2.04922e-14 | 1.000000 | 2.04922e-14 | 1.000000 |
| rad55                         | 9.08303e-15 | 1.000000 | 9.08303e-15 | 1.000000 |
| PAH1+H                        | 7.30661e-15 | 1.000000 | 7.30661e-15 | 1.000000 |
| rad52                         | 1.21234e-15 | 1.000000 | 1.21234e-15 | 1.000000 |
| rad58                         | 5.98418e-16 | 1.000000 | 5.98418e-16 | 1.000000 |
| rad51                         | 4.24460e-16 | 1.000000 | 4.24460e-16 | 1.000000 |
| rad34                         | 3.99509e-16 | 1.000000 | 3.99509e-16 | 1.000000 |
| rad6                          | 3.56096e-16 | 1.000000 | 3.56096e-16 | 1.000000 |
| rad41                         | 8.74309e-17 | 1.000000 | 8.74309e-17 | 1.000000 |
| rad42                         | 6.21460e-17 | 1.000000 | 6.21460e-17 | 1.000000 |
| rad65                         | 9.93490e-18 | 1.000000 | 9.93490e-18 | 1.000000 |
| rad53                         | 3.15138e-19 | 1.000000 | 3.15138e-19 | 1.000000 |
| rad28                         | 3.13991e-19 | 1.000000 | 3.13991e-19 | 1.000000 |
| rad2                          | 2.47401e-19 | 1.000000 | 2.47401e-19 | 1.000000 |
| rad64                         | 5.98172e-20 | 1.000000 | 5.98172e-20 | 1.000000 |
| rad26                         | 4.30044e-20 | 1.000000 | 4.30044e-20 | 1.000000 |
| rad7                          | 3.05264e-20 | 1.000000 | 3.05264e-20 | 1.000000 |
| rad1                          | 1.65193e-20 | 1.000000 | 1.65193e-20 | 1.000000 |
| rad10                         | 1.34959e-20 | 1.000000 | 1.34959e-20 | 1.000000 |
| rad11                         | 7.75146e-21 | 1.000000 | 7.75146e-21 | 1.000000 |
| rad61                         | 4.00746e-21 | 1.000000 | 4.00746e-21 | 1.000000 |
| rad3                          | 1.63819e-21 | 1.000000 | 1.63819e-21 | 1.000000 |
| rad4                          | 8.38972e-22 | 1.000000 | 8.38972e-22 | 1.000000 |
| rad56                         | 1.78942e-22 | 1.000000 | 1.78942e-22 | 1.000000 |
| rad13                         | 1.47662e-22 | 1.000000 | 1.47662e-22 | 1.000000 |
| rad68syn                      | 1.75027e-23 | 1.000000 | 1.75027e-23 | 1.000000 |
| rad68anti                     | 1.37078e-23 | 1.000000 | 1.37078e-23 | 1.000000 |
| rad9                          | 3.50054e-24 | 1.000000 | 3.50054e-24 | 1.000000 |
| rad33                         | 2.81163e-25 | 1.000000 | 2.81163e-25 | 1.000000 |
| rad14                         | 1.61547e-25 | 1.000000 | 1.61547e-25 | 1.000000 |
| rad27                         | 1.43883e-25 | 1.000000 | 1.43883e-25 | 1.000000 |
| rad23                         | 1.23077e-25 | 1.000000 | 1.23077e-25 | 1.000000 |
| rad25                         | 1.00025e-25 | 1.000000 | 1.00025e-25 | 1.000000 |
| rad40syn                      | 3.05769e-26 | 1.000000 | 3.05769e-26 | 1.000000 |
| rad40anti                     | 2.44814e-26 | 1.000000 | 2.44814e-26 | 1.000000 |
| rad15                         | 1.55555e-27 | 1.000000 | 1.55555e-27 | 1.000000 |
| rad73                         | 1.39229e-27 | 1.000000 | 1.39229e-27 | 1.000000 |
| rad45                         | 1.35094e-27 | 1.000000 | 1.35094e-27 | 1.000000 |
| PAH8+H                        | 1.32168e-27 | 1.000000 | 1.32168e-27 | 1.000000 |
| rad47                         | 6.53784e-28 | 1.000000 | 6.53784e-28 | 1.000000 |
| rad19anti                     | 2.32250e-28 | 1.000000 | 2.32250e-28 | 1.000000 |
| rad36                         | 8.34505e-29 | 1.000000 | 8.34505e-29 | 1.000000 |
| rad22                         | 5.81202e-29 | 1.000000 | 5.81202e-29 | 1.000000 |
| rad31                         | 6.57147e-30 | 1.000000 | 6.57147e-30 | 1.000000 |
| rad5                          | 1.69694e-30 | 1.000000 | 1.69694e-30 | 1.000000 |
| rad71                         | 1.48849e-30 | 1.000000 | 1.48849e-30 | 1.000000 |
| rad20                         | 1.47502e-30 | 1.000000 | 1.47502e-30 | 1.000000 |
| rad21                         | 1.11161e-30 | 1.000000 | 1.11161e-30 | 1.000000 |
| rad12                         | 1.80847e-32 | 1.000000 | 1.80847e-32 | 1.000000 |
| rad18                         | 1.30005e-32 | 1.000000 | 1.30005e-32 | 1.000000 |
| rad24                         | 1.90924e-35 | 1.000000 | 1.90924e-35 | 1.000000 |
| rad19syn                      | 2.57212e-37 | 1.000000 | 2.57212e-37 | 1.000000 |
| rad8                          | 4.97262e-60 | 1.000000 | 4.97262e-60 | 1.000000 |

0.100000000E-01 Pa, 190.000000 K

| Rate constant             | True (fraction)        | Effective (fraction)   |
|---------------------------|------------------------|------------------------|
| Total                     | 1.32132e-14 (1.00 )    | 1.32132e-14 (1.00 )    |
| Formation of rad19        | 1.32126e-14 (1.000 )   | 1.32126e-14 (1.000 )   |
| H-abstraction to cyc2enyl | 5.62053e-19 (4.25e-05) | 5.62053e-19 (4.25e-05) |
| H-abstraction to cyclenyl | 8.18073e-23 (6.19e-09) | 8.18073e-23 (6.19e-09) |

| species                       | PYtrue      | Cumul    | PYeffective | Cumul    |
|-------------------------------|-------------|----------|-------------|----------|
| Indene+H                      | 0.999606    | 0.999606 | 0.999606    | 0.999606 |
| PhCHCCH2+H                    | 0.000332279 | 0.999939 | 0.000332279 | 0.999939 |
| Benzene+cycloprop-2-enylidene | 4.25373e-05 | 0.999981 | 4.25373e-05 | 0.999981 |
| PhCCH+CH3                     | 5.91630e-06 | 0.999987 | 5.91630e-06 | 0.999987 |
| C2H2+PhCH2                    | 4.62855e-06 | 0.999992 | 4.62855e-06 | 0.999992 |
| PhCCCH3+H                     | 3.49153e-06 | 0.999995 | 3.49153e-06 | 0.999995 |
| Ph+MeAc                       | 2.88453e-06 | 0.999998 | 2.88453e-06 | 0.999998 |
| rad67                         | 8.49414e-07 | 0.999999 | 8.49414e-07 | 0.999999 |
| rad35                         | 3.67189e-07 | 0.999999 | 3.67189e-07 | 0.999999 |
| Ph+Allene                     | 3.11774e-07 | 1.000000 | 3.11774e-07 | 1.000000 |
| PhCH2CCH+H                    | 4.35468e-08 | 1.000000 | 4.35468e-08 | 1.000000 |
| PAH7+H                        | 3.64798e-08 | 1.000000 | 3.64798e-08 | 1.000000 |
| rad39                         | 1.02910e-08 | 1.000000 | 1.02910e-08 | 1.000000 |
| rad37                         | 9.89359e-09 | 1.000000 | 9.89359e-09 | 1.000000 |
| rad30                         | 6.97985e-09 | 1.000000 | 6.97985e-09 | 1.000000 |
| Benzene+cycloprop-1-enylidene | 6.19133e-09 | 1.000000 | 6.19133e-09 | 1.000000 |
| PAH9+H                        | 5.42131e-10 | 1.000000 | 5.42131e-10 | 1.000000 |
| rad38                         | 2.47169e-10 | 1.000000 | 2.47169e-10 | 1.000000 |
| rad60syn                      | 3.84118e-11 | 1.000000 | 3.84118e-11 | 1.000000 |
| PAH10+CH3                     | 2.71403e-11 | 1.000000 | 2.71403e-11 | 1.000000 |
| PAH3+H                        | 2.06563e-11 | 1.000000 | 2.06563e-11 | 1.000000 |
| rad60anti                     | 1.91574e-11 | 1.000000 | 1.91574e-11 | 1.000000 |
| rad46                         | 1.57944e-11 | 1.000000 | 1.57944e-11 | 1.000000 |
| PhcycC3H3_A+H                 | 1.33133e-11 | 1.000000 | 1.33133e-11 | 1.000000 |
| rad59                         | 4.08856e-12 | 1.000000 | 4.08856e-12 | 1.000000 |
| rad43                         | 1.04070e-12 | 1.000000 | 1.04070e-12 | 1.000000 |
| rad54                         | 9.89804e-13 | 1.000000 | 9.89804e-13 | 1.000000 |
| rad62                         | 2.31457e-13 | 1.000000 | 2.31457e-13 | 1.000000 |
| rad50                         | 1.60533e-13 | 1.000000 | 1.60533e-13 | 1.000000 |
| Phenyl+cycC3H4                | 1.24603e-13 | 1.000000 | 0.000000    | 1.000000 |
| PhcycC3H3_B+H                 | 5.08975e-14 | 1.000000 | 5.08975e-14 | 1.000000 |
| rad70                         | 2.46990e-14 | 1.000000 | 2.46990e-14 | 1.000000 |
| rad55                         | 1.09494e-14 | 1.000000 | 1.09494e-14 | 1.000000 |
| PAH1+H                        | 9.35442e-15 | 1.000000 | 9.35442e-15 | 1.000000 |
| rad52                         | 1.41657e-15 | 1.000000 | 1.41657e-15 | 1.000000 |
| rad58                         | 7.35638e-16 | 1.000000 | 7.35638e-16 | 1.000000 |
| rad51                         | 5.15422e-16 | 1.000000 | 5.15422e-16 | 1.000000 |
| rad34                         | 5.13555e-16 | 1.000000 | 5.13555e-16 | 1.000000 |
| rad6                          | 2.57723e-16 | 1.000000 | 2.57723e-16 | 1.000000 |
| rad41                         | 1.17003e-16 | 1.000000 | 1.17003e-16 | 1.000000 |
| rad42                         | 8.09713e-17 | 1.000000 | 8.09713e-17 | 1.000000 |
| rad65                         | 1.22597e-17 | 1.000000 | 1.22597e-17 | 1.000000 |
| rad53                         | 5.54694e-19 | 1.000000 | 5.54694e-19 | 1.000000 |
| rad28                         | 2.27089e-19 | 1.000000 | 2.27089e-19 | 1.000000 |
| rad2                          | 1.78204e-19 | 1.000000 | 1.78204e-19 | 1.000000 |
| rad64                         | 1.16747e-19 | 1.000000 | 1.16747e-19 | 1.000000 |
| rad26                         | 3.10812e-20 | 1.000000 | 3.10812e-20 | 1.000000 |
| rad7                          | 2.20312e-20 | 1.000000 | 2.20312e-20 | 1.000000 |
| rad1                          | 1.19829e-20 | 1.000000 | 1.19829e-20 | 1.000000 |
| rad61                         | 1.05575e-20 | 1.000000 | 1.05575e-20 | 1.000000 |
| rad10                         | 9.71207e-21 | 1.000000 | 9.71207e-21 | 1.000000 |
| rad11                         | 5.59236e-21 | 1.000000 | 5.59236e-21 | 1.000000 |
| rad3                          | 1.17939e-21 | 1.000000 | 1.17939e-21 | 1.000000 |
| rad4                          | 6.05153e-22 | 1.000000 | 6.05153e-22 | 1.000000 |
| rad56                         | 5.32476e-22 | 1.000000 | 5.32476e-22 | 1.000000 |
| rad13                         | 1.07239e-22 | 1.000000 | 1.07239e-22 | 1.000000 |
| rad68syn                      | 5.52070e-23 | 1.000000 | 5.52070e-23 | 1.000000 |
| rad68anti                     | 4.29548e-23 | 1.000000 | 4.29548e-23 | 1.000000 |
| rad9                          | 3.58152e-24 | 1.000000 | 3.58152e-24 | 1.000000 |
| rad33                         | 2.04571e-25 | 1.000000 | 2.04571e-25 | 1.000000 |
| rad40syn                      | 1.47197e-25 | 1.000000 | 1.47197e-25 | 1.000000 |
| rad40anti                     | 1.18046e-25 | 1.000000 | 1.18046e-25 | 1.000000 |
| rad14                         | 1.17015e-25 | 1.000000 | 1.17015e-25 | 1.000000 |
| rad27                         | 1.04078e-25 | 1.000000 | 1.04078e-25 | 1.000000 |
| rad23                         | 8.04716e-26 | 1.000000 | 8.04716e-26 | 1.000000 |
| rad25                         | 7.26924e-26 | 1.000000 | 7.26924e-26 | 1.000000 |
| PAH8+H                        | 8.53764e-27 | 1.000000 | 8.53764e-27 | 1.000000 |
| rad73                         | 6.33913e-27 | 1.000000 | 6.33913e-27 | 1.000000 |
| rad15                         | 1.59260e-27 | 1.000000 | 1.59260e-27 | 1.000000 |
| rad45                         | 8.79850e-28 | 1.000000 | 8.79850e-28 | 1.000000 |
| rad47                         | 6.82801e-28 | 1.000000 | 6.82801e-28 | 1.000000 |
| rad19anti                     | 6.47928e-28 | 1.000000 | 6.47928e-28 | 1.000000 |
| rad36                         | 5.44825e-29 | 1.000000 | 5.44825e-29 | 1.000000 |
| rad22                         | 3.80003e-29 | 1.000000 | 3.80003e-29 | 1.000000 |
| rad71                         | 1.07814e-29 | 1.000000 | 1.07814e-29 | 1.000000 |
| rad31                         | 4.98845e-30 | 1.000000 | 4.98845e-30 | 1.000000 |
| rad5                          | 1.45235e-30 | 1.000000 | 1.45235e-30 | 1.000000 |
| rad20                         | 1.14613e-30 | 1.000000 | 1.14613e-30 | 1.000000 |

|          |             |          |             |          |
|----------|-------------|----------|-------------|----------|
| rad21    | 8.66595e-31 | 1.000000 | 8.66595e-31 | 1.000000 |
| rad12    | 1.86938e-32 | 1.000000 | 1.86938e-32 | 1.000000 |
| rad18    | 9.80599e-33 | 1.000000 | 9.80599e-33 | 1.000000 |
| rad24    | 1.26242e-35 | 1.000000 | 1.26242e-35 | 1.000000 |
| rad19syn | 7.83212e-37 | 1.000000 | 7.83212e-37 | 1.000000 |
| rad8     | 8.15210e-60 | 1.000000 | 8.15210e-60 | 1.000000 |

0.100000000E-01 Pa, 200.000000 K

| Rate constant             | True (fraction)        | Effective (fraction)   |
|---------------------------|------------------------|------------------------|
| Total                     | 1.52621e-14 (1.00 )    | 1.52621e-14 (1.00 )    |
| Formation of rad19        | 1.52610e-14 (1.000 )   | 1.52610e-14 (1.000 )   |
| H-abstraction to cyc2enyl | 1.06427e-18 (6.97e-05) | 1.06427e-18 (6.97e-05) |
| H-abstraction to cyclenyl | 2.46309e-22 (1.61e-08) | 2.46309e-22 (1.61e-08) |

| species                       | PYtrue      | Cumul    | PYeffective | Cumul    |
|-------------------------------|-------------|----------|-------------|----------|
| Indene+H                      | 0.999565    | 0.999565 | 0.999565    | 0.999565 |
| PhCHCCH2+H                    | 0.000345420 | 0.999911 | 0.000345420 | 0.999911 |
| Benzene+cycloprop-2-enylidene | 6.97330e-05 | 0.999980 | 6.97330e-05 | 0.999980 |
| PhCCH+CH3                     | 6.16171e-06 | 0.999987 | 6.16171e-06 | 0.999987 |
| C2H2+PhCH2                    | 4.86950e-06 | 0.999991 | 4.86950e-06 | 0.999991 |
| PhCCCH3+H                     | 3.65479e-06 | 0.999995 | 3.65479e-06 | 0.999995 |
| Ph+MeAc                       | 3.05144e-06 | 0.999998 | 3.05144e-06 | 0.999998 |
| rad67                         | 8.96372e-07 | 0.999999 | 8.96372e-07 | 0.999999 |
| rad35                         | 3.86624e-07 | 0.999999 | 3.86624e-07 | 0.999999 |
| Ph+Allene                     | 3.37363e-07 | 1.000000 | 3.37363e-07 | 1.000000 |
| PhCH2CCH+H                    | 4.77716e-08 | 1.000000 | 4.77716e-08 | 1.000000 |
| PAH7+H                        | 3.89907e-08 | 1.000000 | 3.89907e-08 | 1.000000 |
| Benzene+cycloprop-1-enylidene | 1.61386e-08 | 1.000000 | 1.61386e-08 | 1.000000 |
| rad39                         | 1.09967e-08 | 1.000000 | 1.09967e-08 | 1.000000 |
| rad37                         | 1.06162e-08 | 1.000000 | 1.06162e-08 | 1.000000 |
| rad30                         | 7.36532e-09 | 1.000000 | 7.36532e-09 | 1.000000 |
| PAH9+H                        | 5.82456e-10 | 1.000000 | 5.82456e-10 | 1.000000 |
| rad38                         | 2.67851e-10 | 1.000000 | 2.67851e-10 | 1.000000 |
| rad60syn                      | 4.14940e-11 | 1.000000 | 4.14940e-11 | 1.000000 |
| PAH10+CH3                     | 3.15667e-11 | 1.000000 | 3.15667e-11 | 1.000000 |
| PAH3+H                        | 2.30008e-11 | 1.000000 | 2.30008e-11 | 1.000000 |
| rad60anti                     | 2.07383e-11 | 1.000000 | 2.07383e-11 | 1.000000 |
| PhcycC3H3_A+H                 | 1.75311e-11 | 1.000000 | 1.75311e-11 | 1.000000 |
| rad46                         | 1.72128e-11 | 1.000000 | 1.72128e-11 | 1.000000 |
| rad59                         | 4.52998e-12 | 1.000000 | 4.52998e-12 | 1.000000 |
| rad43                         | 1.18478e-12 | 1.000000 | 1.18478e-12 | 1.000000 |
| rad54                         | 1.15042e-12 | 1.000000 | 1.15042e-12 | 1.000000 |
| rad62                         | 2.63967e-13 | 1.000000 | 2.63967e-13 | 1.000000 |
| Phenyl+cycC3H4                | 1.83626e-13 | 1.000000 | 0.000000    | 1.000000 |
| rad50                         | 1.82927e-13 | 1.000000 | 1.82927e-13 | 1.000000 |
| PhcycC3H3_B+H                 | 8.87689e-14 | 1.000000 | 8.87689e-14 | 1.000000 |
| rad70                         | 3.00300e-14 | 1.000000 | 3.00300e-14 | 1.000000 |
| rad55                         | 1.33128e-14 | 1.000000 | 1.33128e-14 | 1.000000 |
| PAH1+H                        | 1.20864e-14 | 1.000000 | 1.20864e-14 | 1.000000 |
| rad52                         | 1.66974e-15 | 1.000000 | 1.66974e-15 | 1.000000 |
| rad58                         | 9.12963e-16 | 1.000000 | 9.12963e-16 | 1.000000 |
| rad34                         | 6.66292e-16 | 1.000000 | 6.66292e-16 | 1.000000 |
| rad51                         | 6.32449e-16 | 1.000000 | 6.32449e-16 | 1.000000 |
| rad6                          | 1.89364e-16 | 1.000000 | 1.89364e-16 | 1.000000 |
| rad41                         | 1.57541e-16 | 1.000000 | 1.57541e-16 | 1.000000 |
| rad42                         | 1.06137e-16 | 1.000000 | 1.06137e-16 | 1.000000 |
| rad65                         | 1.52906e-17 | 1.000000 | 1.52906e-17 | 1.000000 |
| rad53                         | 9.59721e-19 | 1.000000 | 9.59721e-19 | 1.000000 |
| rad64                         | 2.21013e-19 | 1.000000 | 2.21013e-19 | 1.000000 |
| rad28                         | 1.66752e-19 | 1.000000 | 1.66752e-19 | 1.000000 |
| rad2                          | 1.30382e-19 | 1.000000 | 1.30382e-19 | 1.000000 |
| rad61                         | 2.60074e-20 | 1.000000 | 2.60074e-20 | 1.000000 |
| rad26                         | 2.28212e-20 | 1.000000 | 2.28212e-20 | 1.000000 |
| rad7                          | 1.61466e-20 | 1.000000 | 1.61466e-20 | 1.000000 |
| rad1                          | 8.83447e-21 | 1.000000 | 8.83447e-21 | 1.000000 |
| rad10                         | 7.10030e-21 | 1.000000 | 7.10030e-21 | 1.000000 |
| rad11                         | 4.09759e-21 | 1.000000 | 4.09759e-21 | 1.000000 |
| rad56                         | 1.46097e-21 | 1.000000 | 1.46097e-21 | 1.000000 |
| rad3                          | 8.62586e-22 | 1.000000 | 8.62586e-22 | 1.000000 |
| rad4                          | 4.43520e-22 | 1.000000 | 4.43520e-22 | 1.000000 |
| rad68syn                      | 1.59108e-22 | 1.000000 | 1.59108e-22 | 1.000000 |
| rad68anti                     | 1.22955e-22 | 1.000000 | 1.22955e-22 | 1.000000 |
| rad13                         | 7.90792e-23 | 1.000000 | 7.90792e-23 | 1.000000 |
| rad9                          | 3.86287e-24 | 1.000000 | 3.86287e-24 | 1.000000 |
| rad40syn                      | 6.17015e-25 | 1.000000 | 6.17015e-25 | 1.000000 |
| rad40anti                     | 4.95158e-25 | 1.000000 | 4.95158e-25 | 1.000000 |
| rad33                         | 1.51143e-25 | 1.000000 | 1.51143e-25 | 1.000000 |



|           |             |          |             |          |
|-----------|-------------|----------|-------------|----------|
| rad14     | 8.60923e-26 | 1.000000 | 8.60923e-26 | 1.000000 |
| rad27     | 7.64818e-26 | 1.000000 | 7.64818e-26 | 1.000000 |
| rad23     | 5.39387e-26 | 1.000000 | 5.39387e-26 | 1.000000 |
| rad25     | 5.36422e-26 | 1.000000 | 5.36422e-26 | 1.000000 |
| PAH8+H    | 4.65789e-26 | 1.000000 | 4.65789e-26 | 1.000000 |
| rad73     | 2.55461e-26 | 1.000000 | 2.55461e-26 | 1.000000 |
| rad19anti | 1.89455e-27 | 1.000000 | 1.89455e-27 | 1.000000 |
| rad15     | 1.71911e-27 | 1.000000 | 1.71911e-27 | 1.000000 |
| rad47     | 7.22416e-28 | 1.000000 | 7.22416e-28 | 1.000000 |
| rad45     | 5.87781e-28 | 1.000000 | 5.87781e-28 | 1.000000 |
| rad71     | 6.53434e-29 | 1.000000 | 6.53434e-29 | 1.000000 |
| rad36     | 3.64997e-29 | 1.000000 | 3.64997e-29 | 1.000000 |
| rad22     | 2.54784e-29 | 1.000000 | 2.54784e-29 | 1.000000 |
| rad31     | 3.87009e-30 | 1.000000 | 3.87009e-30 | 1.000000 |
| rad5      | 1.25331e-30 | 1.000000 | 1.25331e-30 | 1.000000 |
| rad20     | 9.06438e-31 | 1.000000 | 9.06438e-31 | 1.000000 |
| rad21     | 6.87732e-31 | 1.000000 | 6.87732e-31 | 1.000000 |
| rad12     | 2.03826e-32 | 1.000000 | 2.03826e-32 | 1.000000 |
| rad18     | 7.53902e-33 | 1.000000 | 7.53902e-33 | 1.000000 |
| rad24     | 8.56569e-36 | 1.000000 | 8.56569e-36 | 1.000000 |
| rad19syn  | 2.51002e-36 | 1.000000 | 2.51002e-36 | 1.000000 |
| rad8      | 1.36457e-59 | 1.000000 | 1.36457e-59 | 1.000000 |

0.100000000E-01 Pa, 210.00000 K

```

=====
Rate constant      | True (fraction)      Effective (fraction)
-----
Total              | 1.74272e-14 (1.00   ) 1.74272e-14 (1.00   )
Formation of rad19| 1.74253e-14 (1.000  ) 1.74253e-14 (1.000  )
H-abstraction to cyc2enyl| 1.89310e-18 (0.000109) 1.89310e-18 (0.000109)
H-abstraction to cyc1enyl| 6.66714e-22 (3.83e-08) 6.66714e-22 (3.83e-08)

```

| species                       | PYtrue      | Cumul    | PYeffective | Cumul    |
|-------------------------------|-------------|----------|-------------|----------|
| Indene+H                      | 0.999511    | 0.999511 | 0.999511    | 0.999511 |
| PhCHCCH2+H                    | 0.000359758 | 0.999871 | 0.000359758 | 0.999871 |
| Benzene+cycloprop-2-enylidene | 0.000108629 | 0.999980 | 0.000108629 | 0.999980 |
| PhCCH+CH3                     | 6.42885e-06 | 0.999986 | 6.42885e-06 | 0.999986 |
| C2H2+PhCH2                    | 5.13553e-06 | 0.999991 | 5.13553e-06 | 0.999991 |
| PhCCCH3+H                     | 3.83384e-06 | 0.999995 | 3.83384e-06 | 0.999995 |
| Ph+MeAc                       | 3.23657e-06 | 0.999998 | 3.23657e-06 | 0.999998 |
| rad67                         | 9.48392e-07 | 0.999999 | 9.48392e-07 | 0.999999 |
| rad35                         | 4.08106e-07 | 1.000000 | 4.08106e-07 | 1.000000 |
| Ph+Allene                     | 3.66504e-07 | 1.000000 | 3.66504e-07 | 1.000000 |
| PhCH2CCH+H                    | 5.26517e-08 | 1.000000 | 5.26517e-08 | 1.000000 |
| PAH7+H                        | 4.18113e-08 | 1.000000 | 4.18113e-08 | 1.000000 |
| Benzene+cycloprop-1-enylidene | 3.82571e-08 | 1.000000 | 3.82571e-08 | 1.000000 |
| rad39                         | 1.17889e-08 | 1.000000 | 1.17889e-08 | 1.000000 |
| rad37                         | 1.14312e-08 | 1.000000 | 1.14312e-08 | 1.000000 |
| rad30                         | 7.79317e-09 | 1.000000 | 7.79317e-09 | 1.000000 |
| PAH9+H                        | 6.28148e-10 | 1.000000 | 6.28148e-10 | 1.000000 |
| rad38                         | 2.91537e-10 | 1.000000 | 2.91537e-10 | 1.000000 |
| rad60syn                      | 4.50034e-11 | 1.000000 | 4.50034e-11 | 1.000000 |
| PAH10+CH3                     | 3.69788e-11 | 1.000000 | 3.69788e-11 | 1.000000 |
| PAH3+H                        | 2.57566e-11 | 1.000000 | 2.57566e-11 | 1.000000 |
| PhcycC3H3_A+H                 | 2.31911e-11 | 1.000000 | 2.31911e-11 | 1.000000 |
| rad60anti                     | 2.25423e-11 | 1.000000 | 2.25423e-11 | 1.000000 |
| rad46                         | 1.88451e-11 | 1.000000 | 1.88451e-11 | 1.000000 |
| rad59                         | 5.04596e-12 | 1.000000 | 5.04596e-12 | 1.000000 |
| rad43                         | 1.35682e-12 | 1.000000 | 1.35682e-12 | 1.000000 |
| rad54                         | 1.34677e-12 | 1.000000 | 1.34677e-12 | 1.000000 |
| rad62                         | 3.02741e-13 | 1.000000 | 3.02741e-13 | 1.000000 |
| Phenyl+cycC3H4                | 2.70226e-13 | 1.000000 | 0.000000    | 1.000000 |
| rad50                         | 2.09933e-13 | 1.000000 | 2.09933e-13 | 1.000000 |
| PhcycC3H3_B+H                 | 1.51586e-13 | 1.000000 | 1.51586e-13 | 1.000000 |
| rad70                         | 3.68189e-14 | 1.000000 | 3.68189e-14 | 1.000000 |
| rad55                         | 1.63194e-14 | 1.000000 | 1.63194e-14 | 1.000000 |
| PAH1+H                        | 1.57473e-14 | 1.000000 | 1.57473e-14 | 1.000000 |
| rad52                         | 1.98541e-15 | 1.000000 | 1.98541e-15 | 1.000000 |
| rad58                         | 1.14336e-15 | 1.000000 | 1.14336e-15 | 1.000000 |
| rad34                         | 8.71792e-16 | 1.000000 | 8.71792e-16 | 1.000000 |
| rad51                         | 7.84007e-16 | 1.000000 | 7.84007e-16 | 1.000000 |
| rad41                         | 2.13230e-16 | 1.000000 | 2.13230e-16 | 1.000000 |
| rad6                          | 1.41074e-16 | 1.000000 | 1.41074e-16 | 1.000000 |
| rad42                         | 1.39845e-16 | 1.000000 | 1.39845e-16 | 1.000000 |
| rad65                         | 1.92677e-17 | 1.000000 | 1.92677e-17 | 1.000000 |
| rad53                         | 1.63622e-18 | 1.000000 | 1.63622e-18 | 1.000000 |
| rad64                         | 4.07650e-19 | 1.000000 | 4.07650e-19 | 1.000000 |
| rad28                         | 1.24160e-19 | 1.000000 | 1.24160e-19 | 1.000000 |
| rad2                          | 9.67767e-20 | 1.000000 | 9.67767e-20 | 1.000000 |

|           |             |         |             |         |
|-----------|-------------|---------|-------------|---------|
| rad61     | 6.05305e-20 | 1.00000 | 6.05305e-20 | 1.00000 |
| rad26     | 1.70063e-20 | 1.00000 | 1.70063e-20 | 1.00000 |
| rad7      | 1.20018e-20 | 1.00000 | 1.20018e-20 | 1.00000 |
| rad1      | 6.61206e-21 | 1.00000 | 6.61206e-21 | 1.00000 |
| rad10     | 5.26696e-21 | 1.00000 | 5.26696e-21 | 1.00000 |
| rad56     | 3.74333e-21 | 1.00000 | 3.74333e-21 | 1.00000 |
| rad11     | 3.04523e-21 | 1.00000 | 3.04523e-21 | 1.00000 |
| rad3      | 6.40115e-22 | 1.00000 | 6.40115e-22 | 1.00000 |
| rad68syn  | 4.25005e-22 | 1.00000 | 4.25005e-22 | 1.00000 |
| rad4      | 3.29880e-22 | 1.00000 | 3.29880e-22 | 1.00000 |
| rad68anti | 3.26162e-22 | 1.00000 | 3.26162e-22 | 1.00000 |
| rad13     | 5.91352e-23 | 1.00000 | 5.91352e-23 | 1.00000 |
| rad9      | 4.49941e-24 | 1.00000 | 4.49941e-24 | 1.00000 |
| rad40syn  | 2.29885e-24 | 1.00000 | 2.29885e-24 | 1.00000 |
| rad40anti | 1.84451e-24 | 1.00000 | 1.84451e-24 | 1.00000 |
| PAH8+H    | 2.19650e-25 | 1.00000 | 2.19650e-25 | 1.00000 |
| rad33     | 1.13254e-25 | 1.00000 | 1.13254e-25 | 1.00000 |
| rad73     | 9.27513e-26 | 1.00000 | 9.27513e-26 | 1.00000 |
| rad14     | 6.42583e-26 | 1.00000 | 6.42583e-26 | 1.00000 |
| rad27     | 5.70277e-26 | 1.00000 | 5.70277e-26 | 1.00000 |
| rad25     | 4.01432e-26 | 1.00000 | 4.01432e-26 | 1.00000 |
| rad23     | 3.70034e-26 | 1.00000 | 3.70034e-26 | 1.00000 |
| rad19anti | 5.79034e-27 | 1.00000 | 5.79034e-27 | 1.00000 |
| rad15     | 2.00432e-27 | 1.00000 | 2.00432e-27 | 1.00000 |
| rad47     | 7.74672e-28 | 1.00000 | 7.74672e-28 | 1.00000 |
| rad45     | 4.02105e-28 | 1.00000 | 4.02105e-28 | 1.00000 |
| rad71     | 3.39086e-28 | 1.00000 | 3.39086e-28 | 1.00000 |
| rad36     | 2.50508e-29 | 1.00000 | 2.50508e-29 | 1.00000 |
| rad22     | 1.74870e-29 | 1.00000 | 1.74870e-29 | 1.00000 |
| rad31     | 3.07337e-30 | 1.00000 | 3.07337e-30 | 1.00000 |
| rad5      | 1.08940e-30 | 1.00000 | 1.08940e-30 | 1.00000 |
| rad20     | 7.28756e-31 | 1.00000 | 7.28756e-31 | 1.00000 |
| rad21     | 5.54925e-31 | 1.00000 | 5.54925e-31 | 1.00000 |
| rad12     | 2.40161e-32 | 1.00000 | 2.40161e-32 | 1.00000 |
| rad18     | 5.89882e-33 | 1.00000 | 5.89882e-33 | 1.00000 |
| rad19syn  | 8.46110e-36 | 1.00000 | 8.46110e-36 | 1.00000 |
| rad24     | 5.95510e-36 | 1.00000 | 5.95510e-36 | 1.00000 |
| rad8      | 2.33232e-59 | 1.00000 | 2.33232e-59 | 1.00000 |

0.100000000E-01 Pa, 220.00000 K

=====

| Rate constant             | True (fraction)        | Effective (fraction)   |
|---------------------------|------------------------|------------------------|
| Total                     | 1.97009e-14 (1.00 )    | 1.97009e-14 (1.00 )    |
| Formation of rad19        | 1.96977e-14 (1.000 )   | 1.96977e-14 (1.000 )   |
| H-abstraction to cyc2enyl | 3.19064e-18 (0.000162) | 3.19064e-18 (0.000162) |
| H-abstraction to cyc1enyl | 1.64627e-21 (8.36e-08) | 1.64627e-21 (8.36e-08) |

| species                       | PYtrue      | Cumul    | PYeffective | Cumul    |
|-------------------------------|-------------|----------|-------------|----------|
| Indene+H                      | 0.999441    | 0.999441 | 0.999441    | 0.999441 |
| PhCHCCH2+H                    | 0.000375412 | 0.999816 | 0.000375412 | 0.999816 |
| Benzene+cycloprop-2-enylidene | 0.000161954 | 0.999978 | 0.000161954 | 0.999978 |
| PhCCH+CH3                     | 6.71974e-06 | 0.999985 | 6.71974e-06 | 0.999985 |
| C2H2+PhCH2                    | 5.42953e-06 | 0.999991 | 5.42953e-06 | 0.999991 |
| PhCCCH3+H                     | 4.03040e-06 | 0.999995 | 4.03040e-06 | 0.999995 |
| Ph+MeAc                       | 3.44212e-06 | 0.999998 | 3.44212e-06 | 0.999998 |
| rad67                         | 1.00608e-06 | 0.999999 | 1.00608e-06 | 0.999999 |
| rad35                         | 4.31875e-07 | 0.999999 | 4.31875e-07 | 0.999999 |
| Ph+Allene                     | 3.99755e-07 | 1.000000 | 3.99755e-07 | 1.000000 |
| Benzene+cycloprop-1-enylidene | 8.35632e-08 | 1.000000 | 8.35632e-08 | 1.000000 |
| PhCH2CCH+H                    | 5.83028e-08 | 1.000000 | 5.83028e-08 | 1.000000 |
| PAH7+H                        | 4.49846e-08 | 1.000000 | 4.49846e-08 | 1.000000 |
| rad39                         | 1.26791e-08 | 1.000000 | 1.26791e-08 | 1.000000 |
| rad37                         | 1.23522e-08 | 1.000000 | 1.23522e-08 | 1.000000 |
| rad30                         | 8.26867e-09 | 1.000000 | 8.26867e-09 | 1.000000 |
| PAH9+H                        | 6.80024e-10 | 1.000000 | 6.80024e-10 | 1.000000 |
| rad38                         | 3.18734e-10 | 1.000000 | 3.18734e-10 | 1.000000 |
| rad60syn                      | 4.90079e-11 | 1.000000 | 4.90079e-11 | 1.000000 |
| PAH10+CH3                     | 4.36213e-11 | 1.000000 | 4.36213e-11 | 1.000000 |
| PhcycC3H3_A+H                 | 3.07928e-11 | 1.000000 | 3.07928e-11 | 1.000000 |
| PAH3+H                        | 2.90063e-11 | 1.000000 | 2.90063e-11 | 1.000000 |
| rad60anti                     | 2.46053e-11 | 1.000000 | 2.46053e-11 | 1.000000 |
| rad46                         | 2.07283e-11 | 1.000000 | 2.07283e-11 | 1.000000 |
| rad59                         | 5.65089e-12 | 1.000000 | 5.65089e-12 | 1.000000 |
| rad54                         | 1.58772e-12 | 1.000000 | 1.58772e-12 | 1.000000 |
| rad43                         | 1.56284e-12 | 1.000000 | 1.56284e-12 | 1.000000 |
| Phenyl+cycC3H4                | 3.96956e-13 | 1.000000 | 0.000000    | 1.000000 |
| rad62                         | 3.49104e-13 | 1.000000 | 3.49104e-13 | 1.000000 |
| PhcycC3H3_B+H                 | 2.54100e-13 | 1.000000 | 2.54100e-13 | 1.000000 |

|           |             |         |             |         |
|-----------|-------------|---------|-------------|---------|
| rad50     | 2.42645e-13 | 1.00000 | 2.42645e-13 | 1.00000 |
| rad70     | 4.55004e-14 | 1.00000 | 4.55004e-14 | 1.00000 |
| PAH1+H    | 2.06709e-14 | 1.00000 | 2.06709e-14 | 1.00000 |
| rad55     | 2.01601e-14 | 1.00000 | 2.01601e-14 | 1.00000 |
| rad52     | 2.38107e-15 | 1.00000 | 2.38107e-15 | 1.00000 |
| rad58     | 1.44407e-15 | 1.00000 | 1.44407e-15 | 1.00000 |
| rad34     | 1.14930e-15 | 1.00000 | 1.14930e-15 | 1.00000 |
| rad51     | 9.81446e-16 | 1.00000 | 9.81446e-16 | 1.00000 |
| rad41     | 2.89830e-16 | 1.00000 | 2.89830e-16 | 1.00000 |
| rad42     | 1.85049e-16 | 1.00000 | 1.85049e-16 | 1.00000 |
| rad6      | 1.06480e-16 | 1.00000 | 1.06480e-16 | 1.00000 |
| rad65     | 2.45161e-17 | 1.00000 | 2.45161e-17 | 1.00000 |
| rad53     | 2.75361e-18 | 1.00000 | 2.75361e-18 | 1.00000 |
| rad64     | 7.35064e-19 | 1.00000 | 7.35064e-19 | 1.00000 |
| rad61     | 1.34193e-19 | 1.00000 | 1.34193e-19 | 1.00000 |
| rad28     | 9.36644e-20 | 1.00000 | 9.36644e-20 | 1.00000 |
| rad2      | 7.28247e-20 | 1.00000 | 7.28247e-20 | 1.00000 |
| rad26     | 1.28586e-20 | 1.00000 | 1.28586e-20 | 1.00000 |
| rad56     | 9.04719e-21 | 1.00000 | 9.04719e-21 | 1.00000 |
| rad7      | 9.04035e-21 | 1.00000 | 9.04035e-21 | 1.00000 |
| rad1      | 5.02058e-21 | 1.00000 | 5.02058e-21 | 1.00000 |
| rad10     | 3.96152e-21 | 1.00000 | 3.96152e-21 | 1.00000 |
| rad11     | 2.29360e-21 | 1.00000 | 2.29360e-21 | 1.00000 |
| rad68syn  | 1.06417e-21 | 1.00000 | 1.06417e-21 | 1.00000 |
| rad68anti | 8.11034e-22 | 1.00000 | 8.11034e-22 | 1.00000 |
| rad3      | 4.81630e-22 | 1.00000 | 4.81630e-22 | 1.00000 |
| rad4      | 2.48822e-22 | 1.00000 | 2.48822e-22 | 1.00000 |
| rad13     | 4.48092e-23 | 1.00000 | 4.48092e-23 | 1.00000 |
| rad40syn  | 7.73749e-24 | 1.00000 | 7.73749e-24 | 1.00000 |
| rad40anti | 6.20266e-24 | 1.00000 | 6.20266e-24 | 1.00000 |
| rad9      | 5.89373e-24 | 1.00000 | 5.89373e-24 | 1.00000 |
| PAH8+H    | 9.11766e-25 | 1.00000 | 9.11766e-25 | 1.00000 |
| rad73     | 3.07609e-25 | 1.00000 | 3.07609e-25 | 1.00000 |
| rad33     | 8.60001e-26 | 1.00000 | 8.60001e-26 | 1.00000 |
| rad14     | 4.86220e-26 | 1.00000 | 4.86220e-26 | 1.00000 |
| rad27     | 4.31167e-26 | 1.00000 | 4.31167e-26 | 1.00000 |
| rad25     | 3.04418e-26 | 1.00000 | 3.04418e-26 | 1.00000 |
| rad23     | 2.59573e-26 | 1.00000 | 2.59573e-26 | 1.00000 |
| rad19anti | 1.84395e-26 | 1.00000 | 1.84395e-26 | 1.00000 |
| rad15     | 2.62830e-27 | 1.00000 | 2.62830e-27 | 1.00000 |
| rad71     | 1.53417e-27 | 1.00000 | 1.53417e-27 | 1.00000 |
| rad47     | 8.42424e-28 | 1.00000 | 8.42424e-28 | 1.00000 |
| rad45     | 2.81432e-28 | 1.00000 | 2.81432e-28 | 1.00000 |
| rad36     | 1.75978e-29 | 1.00000 | 1.75978e-29 | 1.00000 |
| rad22     | 1.22727e-29 | 1.00000 | 1.22727e-29 | 1.00000 |
| rad31     | 2.51618e-30 | 1.00000 | 2.51618e-30 | 1.00000 |
| rad5      | 9.52965e-31 | 1.00000 | 9.52965e-31 | 1.00000 |
| rad20     | 5.95177e-31 | 1.00000 | 5.95177e-31 | 1.00000 |
| rad21     | 4.54932e-31 | 1.00000 | 4.54932e-31 | 1.00000 |
| rad12     | 3.18445e-32 | 1.00000 | 3.18445e-32 | 1.00000 |
| rad18     | 4.69254e-33 | 1.00000 | 4.69254e-33 | 1.00000 |
| rad19syn  | 2.99699e-35 | 1.00000 | 2.99699e-35 | 1.00000 |
| rad24     | 4.23887e-36 | 1.00000 | 4.23887e-36 | 1.00000 |
| rad8      | 4.07114e-59 | 1.00000 | 4.07114e-59 | 1.00000 |

0.100000000E-01 Pa, 230.00000 K

| Rate constant                 | True (fraction)        | Effective (fraction)   |             |          |
|-------------------------------|------------------------|------------------------|-------------|----------|
| Total                         | 2.20761e-14 (1.00 )    | 2.20761e-14 (1.00 )    |             |          |
| Formation of rad19            | 2.20710e-14 (1.000 )   | 2.20710e-14 (1.000 )   |             |          |
| H-abstraction to cyc2enyl     | 5.13155e-18 (0.000232) | 5.13155e-18 (0.000232) |             |          |
| H-abstraction to cyclenyl     | 3.75316e-21 (1.70e-07) | 3.75316e-21 (1.70e-07) |             |          |
| species                       | PYtrue                 | Cumul                  | PYeffective | Cumul    |
| Indene+H                      | 0.999352               | 0.999352               | 0.999352    | 0.999352 |
| PhCHCCH2+H                    | 0.000392508            | 0.999745               | 0.000392508 | 0.999745 |
| Benzene+cycloprop-2-enylidene | 0.000232448            | 0.999977               | 0.000232448 | 0.999977 |
| PhCCH+CH3                     | 7.03649e-06            | 0.999984               | 7.03649e-06 | 0.999984 |
| C2H2+PhCH2                    | 5.75462e-06            | 0.999990               | 5.75462e-06 | 0.999990 |
| PhCCCH3+H                     | 4.24622e-06            | 0.999994               | 4.24622e-06 | 0.999994 |
| Ph+MeAc                       | 3.67051e-06            | 0.999998               | 3.67051e-06 | 0.999998 |
| rad67                         | 1.07010e-06            | 0.999999               | 1.07010e-06 | 0.999999 |
| rad35                         | 4.58193e-07            | 1.000000               | 4.58193e-07 | 1.000000 |
| Ph+Allene                     | 4.37760e-07            | 1.000000               | 4.37760e-07 | 1.000000 |
| Benzene+cycloprop-1-enylidene | 1.70010e-07            | 1.000000               | 1.70010e-07 | 1.000000 |
| PhCH2CCH+H                    | 6.48602e-08            | 1.000000               | 6.48602e-08 | 1.000000 |
| PAH7+H                        | 4.85591e-08            | 1.000000               | 4.85591e-08 | 1.000000 |
| rad39                         | 1.36808e-08            | 1.000000               | 1.36808e-08 | 1.000000 |

|                |             |         |             |         |
|----------------|-------------|---------|-------------|---------|
| rad37          | 1.33943e-08 | 1.00000 | 1.33943e-08 | 1.00000 |
| rad30          | 8.79760e-09 | 1.00000 | 8.79760e-09 | 1.00000 |
| PAH9+H         | 7.39028e-10 | 1.00000 | 7.39028e-10 | 1.00000 |
| rad38          | 3.50035e-10 | 1.00000 | 3.50035e-10 | 1.00000 |
| rad60syn       | 5.35854e-11 | 1.00000 | 5.35854e-11 | 1.00000 |
| PAH10+CH3      | 5.18004e-11 | 1.00000 | 5.18004e-11 | 1.00000 |
| PhcycC3H3_A+H  | 4.10035e-11 | 1.00000 | 4.10035e-11 | 1.00000 |
| PAH3+H         | 3.28496e-11 | 1.00000 | 3.28496e-11 | 1.00000 |
| rad60anti      | 2.69694e-11 | 1.00000 | 2.69694e-11 | 1.00000 |
| rad46          | 2.29066e-11 | 1.00000 | 2.29066e-11 | 1.00000 |
| rad59          | 6.36197e-12 | 1.00000 | 6.36197e-12 | 1.00000 |
| rad54          | 1.88437e-12 | 1.00000 | 1.88437e-12 | 1.00000 |
| rad43          | 1.81012e-12 | 1.00000 | 1.81012e-12 | 1.00000 |
| Phenyl+cycC3H4 | 5.81829e-13 | 1.00000 | 0.00000     | 1.00000 |
| PhcycC3H3_B+H  | 4.18958e-13 | 1.00000 | 4.18958e-13 | 1.00000 |
| rad62          | 4.04652e-13 | 1.00000 | 4.04652e-13 | 1.00000 |
| rad50          | 2.82422e-13 | 1.00000 | 2.82422e-13 | 1.00000 |
| rad70          | 5.66410e-14 | 1.00000 | 5.66410e-14 | 1.00000 |
| PAH1+H         | 2.73107e-14 | 1.00000 | 2.73107e-14 | 1.00000 |
| rad55          | 2.50827e-14 | 1.00000 | 2.50827e-14 | 1.00000 |
| rad52          | 2.87932e-15 | 1.00000 | 2.87932e-15 | 1.00000 |
| rad58          | 1.83808e-15 | 1.00000 | 1.83808e-15 | 1.00000 |
| rad34          | 1.52513e-15 | 1.00000 | 1.52513e-15 | 1.00000 |
| rad51          | 1.24000e-15 | 1.00000 | 1.24000e-15 | 1.00000 |
| rad41          | 3.95240e-16 | 1.00000 | 3.95240e-16 | 1.00000 |
| rad42          | 2.45696e-16 | 1.00000 | 2.45696e-16 | 1.00000 |
| rad6           | 8.14059e-17 | 1.00000 | 8.14059e-17 | 1.00000 |
| rad65          | 3.14766e-17 | 1.00000 | 3.14766e-17 | 1.00000 |
| rad53          | 4.57988e-18 | 1.00000 | 4.57988e-18 | 1.00000 |
| rad64          | 1.29910e-18 | 1.00000 | 1.29910e-18 | 1.00000 |
| rad61          | 2.85208e-19 | 1.00000 | 2.85208e-19 | 1.00000 |
| rad28          | 7.15708e-20 | 1.00000 | 7.15708e-20 | 1.00000 |
| rad2           | 5.55569e-20 | 1.00000 | 5.55569e-20 | 1.00000 |
| rad56          | 2.07884e-20 | 1.00000 | 2.07884e-20 | 1.00000 |
| rad26          | 9.87151e-21 | 1.00000 | 9.87151e-21 | 1.00000 |
| rad7           | 6.89907e-21 | 1.00000 | 6.89907e-21 | 1.00000 |
| rad1           | 3.86765e-21 | 1.00000 | 3.86765e-21 | 1.00000 |
| rad10          | 3.02118e-21 | 1.00000 | 3.02118e-21 | 1.00000 |
| rad68syn       | 2.52002e-21 | 1.00000 | 2.52002e-21 | 1.00000 |
| rad68anti      | 1.90763e-21 | 1.00000 | 1.90763e-21 | 1.00000 |
| rad11          | 1.75030e-21 | 1.00000 | 1.75030e-21 | 1.00000 |
| rad3           | 3.67402e-22 | 1.00000 | 3.67402e-22 | 1.00000 |
| rad4           | 1.90322e-22 | 1.00000 | 1.90322e-22 | 1.00000 |
| rad13          | 3.43979e-23 | 1.00000 | 3.43979e-23 | 1.00000 |
| rad40syn       | 2.38295e-23 | 1.00000 | 2.38295e-23 | 1.00000 |
| rad40anti      | 1.90752e-23 | 1.00000 | 1.90752e-23 | 1.00000 |
| rad9           | 9.11119e-24 | 1.00000 | 9.11119e-24 | 1.00000 |
| PAH8+H         | 3.38005e-24 | 1.00000 | 3.38005e-24 | 1.00000 |
| rad73          | 9.41747e-25 | 1.00000 | 9.41747e-25 | 1.00000 |
| rad33          | 6.61660e-26 | 1.00000 | 6.61660e-26 | 1.00000 |
| rad19anti      | 6.09627e-26 | 1.00000 | 6.09627e-26 | 1.00000 |
| rad14          | 3.72954e-26 | 1.00000 | 3.72954e-26 | 1.00000 |
| rad27          | 3.30552e-26 | 1.00000 | 3.30552e-26 | 1.00000 |
| rad25          | 2.33875e-26 | 1.00000 | 2.33875e-26 | 1.00000 |
| rad23          | 1.86166e-26 | 1.00000 | 1.86166e-26 | 1.00000 |
| rad71          | 6.14063e-27 | 1.00000 | 6.14063e-27 | 1.00000 |
| rad15          | 4.06807e-27 | 1.00000 | 4.06807e-27 | 1.00000 |
| rad47          | 9.29611e-28 | 1.00000 | 9.29611e-28 | 1.00000 |
| rad45          | 2.01494e-28 | 1.00000 | 2.01494e-28 | 1.00000 |
| rad36          | 1.26522e-29 | 1.00000 | 1.26522e-29 | 1.00000 |
| rad22          | 8.80471e-30 | 1.00000 | 8.80471e-30 | 1.00000 |
| rad31          | 2.17343e-30 | 1.00000 | 2.17343e-30 | 1.00000 |
| rad5           | 8.38347e-31 | 1.00000 | 8.38347e-31 | 1.00000 |
| rad20          | 4.93694e-31 | 1.00000 | 4.93694e-31 | 1.00000 |
| rad21          | 3.78872e-31 | 1.00000 | 3.78872e-31 | 1.00000 |
| rad12          | 4.98701e-32 | 1.00000 | 4.98701e-32 | 1.00000 |
| rad18          | 3.79379e-33 | 1.00000 | 3.79379e-33 | 1.00000 |
| rad19syn       | 1.11381e-34 | 1.00000 | 1.11381e-34 | 1.00000 |
| rad24          | 3.08942e-36 | 1.00000 | 3.08942e-36 | 1.00000 |
| rad8           | 7.25937e-59 | 1.00000 | 7.25937e-59 | 1.00000 |

0.100000000E-01 Pa, 240.000000 K

| Rate constant             | True (fraction)        | Effective (fraction)   |
|---------------------------|------------------------|------------------------|
| Total                     | 2.45462e-14 (1.00 )    | 2.45462e-14 (1.00 )    |
| Formation of rad19        | 2.45383e-14 (1.000 )   | 2.45383e-14 (1.000 )   |
| H-abstraction to cyc2enyl | 7.92234e-18 (0.000323) | 7.92234e-18 (0.000323) |
| H-abstraction to cyclenyl | 7.97958e-21 (3.25e-07) | 7.97958e-21 (3.25e-07) |

| species                       | PYtrue      | Cumul    | PYeffective | Cumul    |
|-------------------------------|-------------|----------|-------------|----------|
| Indene+H                      | 0.999242    | 0.999242 | 0.999242    | 0.999242 |
| PhCHCCH2+H                    | 0.000411180 | 0.999653 | 0.000411180 | 0.999653 |
| Benzene+cycloprop-2-enylidene | 0.000322752 | 0.999976 | 0.000322752 | 0.999976 |
| PhCCH+CH3                     | 7.38134e-06 | 0.999983 | 7.38134e-06 | 0.999983 |
| C2H2+PhCH2                    | 6.11420e-06 | 0.999989 | 6.11420e-06 | 0.999989 |
| PhCCCH3+H                     | 4.48323e-06 | 0.999994 | 4.48323e-06 | 0.999994 |
| Ph+MeAc                       | 3.92437e-06 | 0.999998 | 3.92437e-06 | 0.999998 |
| rad67                         | 1.14118e-06 | 0.999999 | 1.14118e-06 | 0.999999 |
| rad35                         | 4.87346e-07 | 1.000000 | 4.87346e-07 | 1.000000 |
| Ph+Allene                     | 4.81257e-07 | 1.000000 | 4.81257e-07 | 1.000000 |
| Benzene+cycloprop-1-enylidene | 3.25084e-07 | 1.000000 | 3.25084e-07 | 1.000000 |
| PhCH2CCH+H                    | 7.24828e-08 | 1.000000 | 7.24828e-08 | 1.000000 |
| PAH7+H                        | 5.25890e-08 | 1.000000 | 5.25890e-08 | 1.000000 |
| rad39                         | 1.48086e-08 | 1.000000 | 1.48086e-08 | 1.000000 |
| rad37                         | 1.45747e-08 | 1.000000 | 1.45747e-08 | 1.000000 |
| rad30                         | 9.38639e-09 | 1.000000 | 9.38639e-09 | 1.000000 |
| PAH9+H                        | 8.06239e-10 | 1.000000 | 8.06239e-10 | 1.000000 |
| rad38                         | 3.86126e-10 | 1.000000 | 3.86126e-10 | 1.000000 |
| PAH10+CH3                     | 6.18995e-11 | 1.000000 | 6.18995e-11 | 1.000000 |
| rad60syn                      | 5.88263e-11 | 1.000000 | 5.88263e-11 | 1.000000 |
| PhcycC3H3_A+H                 | 5.47105e-11 | 1.000000 | 5.47105e-11 | 1.000000 |
| PAH3+H                        | 3.74063e-11 | 1.000000 | 3.74063e-11 | 1.000000 |
| rad60anti                     | 2.96826e-11 | 1.000000 | 2.96826e-11 | 1.000000 |
| rad46                         | 2.54309e-11 | 1.000000 | 2.54309e-11 | 1.000000 |
| rad59                         | 7.19975e-12 | 1.000000 | 7.19975e-12 | 1.000000 |
| rad54                         | 2.25061e-12 | 1.000000 | 2.25061e-12 | 1.000000 |
| rad43                         | 2.10754e-12 | 1.000000 | 2.10754e-12 | 1.000000 |
| Phenyl+cycC3H4                | 8.50545e-13 | 1.000000 | 0.000000    | 1.000000 |
| PhcycC3H3_B+H                 | 6.80482e-13 | 1.000000 | 6.80482e-13 | 1.000000 |
| rad62                         | 4.71308e-13 | 1.000000 | 4.71308e-13 | 1.000000 |
| rad50                         | 3.30964e-13 | 1.000000 | 3.30964e-13 | 1.000000 |
| rad70                         | 7.09779e-14 | 1.000000 | 7.09779e-14 | 1.000000 |
| PAH1+H                        | 3.62817e-14 | 1.000000 | 3.62817e-14 | 1.000000 |
| rad55                         | 3.14084e-14 | 1.000000 | 3.14084e-14 | 1.000000 |
| rad52                         | 3.50939e-15 | 1.000000 | 3.50939e-15 | 1.000000 |
| rad58                         | 2.35599e-15 | 1.000000 | 2.35599e-15 | 1.000000 |
| rad34                         | 2.03505e-15 | 1.000000 | 2.03505e-15 | 1.000000 |
| rad51                         | 1.58013e-15 | 1.000000 | 1.58013e-15 | 1.000000 |
| rad41                         | 5.40253e-16 | 1.000000 | 5.40253e-16 | 1.000000 |
| rad42                         | 3.27035e-16 | 1.000000 | 3.27035e-16 | 1.000000 |
| rad6                          | 6.30714e-17 | 1.000000 | 6.30714e-17 | 1.000000 |
| rad65                         | 4.07460e-17 | 1.000000 | 4.07460e-17 | 1.000000 |
| rad53                         | 7.53456e-18 | 1.000000 | 7.53456e-18 | 1.000000 |
| rad64                         | 2.25464e-18 | 1.000000 | 2.25464e-18 | 1.000000 |
| rad61                         | 5.84050e-19 | 1.000000 | 5.84050e-19 | 1.000000 |
| rad28                         | 5.54187e-20 | 1.000000 | 5.54187e-20 | 1.000000 |
| rad56                         | 4.56897e-20 | 1.000000 | 4.56897e-20 | 1.000000 |
| rad2                          | 4.30087e-20 | 1.000000 | 4.30087e-20 | 1.000000 |
| rad26                         | 7.71055e-21 | 1.000000 | 7.71055e-21 | 1.000000 |
| rad68syn                      | 5.68312e-21 | 1.000000 | 5.68312e-21 | 1.000000 |
| rad7                          | 5.33672e-21 | 1.000000 | 5.33672e-21 | 1.000000 |
| rad68anti                     | 4.27418e-21 | 1.000000 | 4.27418e-21 | 1.000000 |
| rad1                          | 3.02585e-21 | 1.000000 | 3.02585e-21 | 1.000000 |
| rad10                         | 2.33835e-21 | 1.000000 | 2.33835e-21 | 1.000000 |
| rad11                         | 1.35398e-21 | 1.000000 | 1.35398e-21 | 1.000000 |
| rad3                          | 2.84384e-22 | 1.000000 | 2.84384e-22 | 1.000000 |
| rad4                          | 1.47750e-22 | 1.000000 | 1.47750e-22 | 1.000000 |
| rad40syn                      | 6.78263e-23 | 1.000000 | 6.78263e-23 | 1.000000 |
| rad40anti                     | 5.41963e-23 | 1.000000 | 5.41963e-23 | 1.000000 |
| rad13                         | 2.67646e-23 | 1.000000 | 2.67646e-23 | 1.000000 |
| rad9                          | 1.70680e-23 | 1.000000 | 1.70680e-23 | 1.000000 |
| PAH8+H                        | 1.13213e-23 | 1.000000 | 1.13213e-23 | 1.000000 |
| rad73                         | 2.68269e-24 | 1.000000 | 2.68269e-24 | 1.000000 |
| rad19anti                     | 2.08390e-25 | 1.000000 | 2.08390e-25 | 1.000000 |
| rad33                         | 5.16043e-26 | 1.000000 | 5.16043e-26 | 1.000000 |
| rad14                         | 2.90249e-26 | 1.000000 | 2.90249e-26 | 1.000000 |
| rad27                         | 2.57207e-26 | 1.000000 | 2.57207e-26 | 1.000000 |
| rad71                         | 2.20055e-26 | 1.000000 | 2.20055e-26 | 1.000000 |
| rad25                         | 1.82127e-26 | 1.000000 | 1.82127e-26 | 1.000000 |
| rad23                         | 1.36631e-26 | 1.000000 | 1.36631e-26 | 1.000000 |
| rad15                         | 7.63093e-27 | 1.000000 | 7.63093e-27 | 1.000000 |
| rad47                         | 1.04166e-27 | 1.000000 | 1.04166e-27 | 1.000000 |
| rad45                         | 1.47704e-28 | 1.000000 | 1.47704e-28 | 1.000000 |
| rad36                         | 9.31838e-30 | 1.000000 | 9.31838e-30 | 1.000000 |
| rad22                         | 6.46128e-30 | 1.000000 | 6.46128e-30 | 1.000000 |
| rad31                         | 2.11305e-30 | 1.000000 | 2.11305e-30 | 1.000000 |
| rad5                          | 7.41260e-31 | 1.000000 | 7.41260e-31 | 1.000000 |
| rad20                         | 4.16167e-31 | 1.000000 | 4.16167e-31 | 1.000000 |

|          |             |         |             |         |
|----------|-------------|---------|-------------|---------|
| rad21    | 3.20719e-31 | 1.00000 | 3.20719e-31 | 1.00000 |
| rad12    | 9.47137e-32 | 1.00000 | 9.47137e-32 | 1.00000 |
| rad18    | 3.11827e-33 | 1.00000 | 3.11827e-33 | 1.00000 |
| rad19syn | 4.33470e-34 | 1.00000 | 4.33470e-34 | 1.00000 |
| rad24    | 2.30809e-36 | 1.00000 | 2.30809e-36 | 1.00000 |
| rad8     | 1.32280e-58 | 1.00000 | 1.32280e-58 | 1.00000 |

0.100000000E-01 Pa, 250.000000 K

| Rate constant             | True (fraction)        | Effective (fraction)   |
|---------------------------|------------------------|------------------------|
| Total                     | 2.71048e-14 (1.00 )    | 2.71048e-14 (1.00 )    |
| Formation of rad19        | 2.70930e-14 (1.000 )   | 2.70930e-14 (1.000 )   |
| H-abstraction to cyc2enyl | 1.17991e-17 (0.000435) | 1.17991e-17 (0.000435) |
| H-abstraction to cyclenyl | 1.59554e-20 (5.89e-07) | 1.59554e-20 (5.89e-07) |

| species                       | PYtrue      | Cumul    | PYeffective | Cumul    |
|-------------------------------|-------------|----------|-------------|----------|
| Indene+H                      | 0.999107    | 0.999107 | 0.999107    | 0.999107 |
| Benzene+cycloprop-2-enylidene | 0.000435312 | 0.999543 | 0.000435312 | 0.999543 |
| PhCHCCH2+H                    | 0.000431573 | 0.999974 | 0.000431573 | 0.999974 |
| PhCCH+CH3                     | 7.75662e-06 | 0.999982 | 7.75662e-06 | 0.999982 |
| C2H2+PhCH2                    | 6.51199e-06 | 0.999988 | 6.51199e-06 | 0.999988 |
| PhCCCH3+H                     | 4.74349e-06 | 0.999993 | 4.74349e-06 | 0.999993 |
| Ph+MeAc                       | 4.20660e-06 | 0.999997 | 4.20660e-06 | 0.999997 |
| rad67                         | 1.22013e-06 | 0.999999 | 1.22013e-06 | 0.999999 |
| Benzene+cycloprop-1-enylidene | 5.88656e-07 | 0.999999 | 5.88656e-07 | 0.999999 |
| Ph+Allene                     | 5.31094e-07 | 1.000000 | 5.31094e-07 | 1.000000 |
| rad35                         | 5.19649e-07 | 1.000000 | 5.19649e-07 | 1.000000 |
| PhCH2CCH+H                    | 8.13565e-08 | 1.000000 | 8.13565e-08 | 1.000000 |
| PAH7+H                        | 5.71353e-08 | 1.000000 | 5.71353e-08 | 1.000000 |
| rad39                         | 1.60792e-08 | 1.000000 | 1.60792e-08 | 1.000000 |
| rad37                         | 1.59129e-08 | 1.000000 | 1.59129e-08 | 1.000000 |
| rad30                         | 1.00421e-08 | 1.000000 | 1.00421e-08 | 1.000000 |
| PAH9+H                        | 8.82899e-10 | 1.000000 | 8.82899e-10 | 1.000000 |
| rad38                         | 4.27815e-10 | 1.000000 | 4.27815e-10 | 1.000000 |
| PAH10+CH3                     | 7.43975e-11 | 1.000000 | 7.43975e-11 | 1.000000 |
| PhcycC3H3_A+H                 | 7.30896e-11 | 1.000000 | 7.30896e-11 | 1.000000 |
| rad60syn                      | 6.48346e-11 | 1.000000 | 6.48346e-11 | 1.000000 |
| PAH3+H                        | 4.28208e-11 | 1.000000 | 4.28208e-11 | 1.000000 |
| rad60anti                     | 3.28008e-11 | 1.000000 | 3.28008e-11 | 1.000000 |
| rad46                         | 2.83617e-11 | 1.000000 | 2.83617e-11 | 1.000000 |
| rad59                         | 8.18879e-12 | 1.000000 | 8.18879e-12 | 1.000000 |
| rad54                         | 2.70380e-12 | 1.000000 | 2.70380e-12 | 1.000000 |
| rad43                         | 2.46582e-12 | 1.000000 | 2.46582e-12 | 1.000000 |
| Phenyl+cycC3H4                | 1.23952e-12 | 1.000000 | 0.000000    | 1.000000 |
| PhcycC3H3_B+H                 | 1.09005e-12 | 1.000000 | 1.09005e-12 | 1.000000 |
| rad62                         | 5.51382e-13 | 1.000000 | 5.51382e-13 | 1.000000 |
| rad50                         | 3.90388e-13 | 1.000000 | 3.90388e-13 | 1.000000 |
| rad70                         | 8.94677e-14 | 1.000000 | 8.94677e-14 | 1.000000 |
| PAH1+H                        | 4.84149e-14 | 1.000000 | 4.84149e-14 | 1.000000 |
| rad55                         | 3.95541e-14 | 1.000000 | 3.95541e-14 | 1.000000 |
| rad52                         | 4.30904e-15 | 1.000000 | 4.30904e-15 | 1.000000 |
| rad58                         | 3.03838e-15 | 1.000000 | 3.03838e-15 | 1.000000 |
| rad34                         | 2.72774e-15 | 1.000000 | 2.72774e-15 | 1.000000 |
| rad51                         | 2.02926e-15 | 1.000000 | 2.02926e-15 | 1.000000 |
| rad41                         | 7.39547e-16 | 1.000000 | 7.39547e-16 | 1.000000 |
| rad42                         | 4.36023e-16 | 1.000000 | 4.36023e-16 | 1.000000 |
| rad65                         | 5.31323e-17 | 1.000000 | 5.31323e-17 | 1.000000 |
| rad6                          | 4.95965e-17 | 1.000000 | 4.95965e-17 | 1.000000 |
| rad53                         | 1.22669e-17 | 1.000000 | 1.22669e-17 | 1.000000 |
| rad64                         | 3.84801e-18 | 1.000000 | 3.84801e-18 | 1.000000 |
| rad61                         | 1.15682e-18 | 1.000000 | 1.15682e-18 | 1.000000 |
| rad56                         | 9.64939e-20 | 1.000000 | 9.64939e-20 | 1.000000 |
| rad28                         | 4.35456e-20 | 1.000000 | 4.35456e-20 | 1.000000 |
| rad2                          | 3.38666e-20 | 1.000000 | 3.38666e-20 | 1.000000 |
| rad68syn                      | 1.22699e-20 | 1.000000 | 1.22699e-20 | 1.000000 |
| rad68anti                     | 9.17167e-21 | 1.000000 | 9.17167e-21 | 1.000000 |
| rad26                         | 6.15371e-21 | 1.000000 | 6.15371e-21 | 1.000000 |
| rad7                          | 4.19065e-21 | 1.000000 | 4.19065e-21 | 1.000000 |
| rad1                          | 2.40997e-21 | 1.000000 | 2.40997e-21 | 1.000000 |
| rad10                         | 1.84119e-21 | 1.000000 | 1.84119e-21 | 1.000000 |
| rad11                         | 1.06334e-21 | 1.000000 | 1.06334e-21 | 1.000000 |
| rad3                          | 2.23848e-22 | 1.000000 | 2.23848e-22 | 1.000000 |
| rad40syn                      | 1.79819e-22 | 1.000000 | 1.79819e-22 | 1.000000 |
| rad40anti                     | 1.43396e-22 | 1.000000 | 1.43396e-22 | 1.000000 |
| rad4                          | 1.16671e-22 | 1.000000 | 1.16671e-22 | 1.000000 |
| rad9                          | 3.80181e-23 | 1.000000 | 3.80181e-23 | 1.000000 |
| PAH8+H                        | 3.45898e-23 | 1.000000 | 3.45898e-23 | 1.000000 |
| rad13                         | 2.11401e-23 | 1.000000 | 2.11401e-23 | 1.000000 |

|           |             |         |             |         |
|-----------|-------------|---------|-------------|---------|
| rad73     | 7.15300e-24 | 1.00000 | 7.15300e-24 | 1.00000 |
| rad19anti | 7.33166e-25 | 1.00000 | 7.33166e-25 | 1.00000 |
| rad71     | 7.13233e-26 | 1.00000 | 7.13233e-26 | 1.00000 |
| rad33     | 4.08613e-26 | 1.00000 | 4.08613e-26 | 1.00000 |
| rad14     | 2.29691e-26 | 1.00000 | 2.29691e-26 | 1.00000 |
| rad27     | 2.03619e-26 | 1.00000 | 2.03619e-26 | 1.00000 |
| rad15     | 1.70224e-26 | 1.00000 | 1.70224e-26 | 1.00000 |
| rad25     | 1.43980e-26 | 1.00000 | 1.43980e-26 | 1.00000 |
| rad23     | 1.02853e-26 | 1.00000 | 1.02853e-26 | 1.00000 |
| rad47     | 1.18613e-27 | 1.00000 | 1.18613e-27 | 1.00000 |
| rad45     | 1.11120e-28 | 1.00000 | 1.11120e-28 | 1.00000 |
| rad36     | 7.04724e-30 | 1.00000 | 7.04724e-30 | 1.00000 |
| rad22     | 4.85990e-30 | 1.00000 | 4.85990e-30 | 1.00000 |
| rad31     | 2.63620e-30 | 1.00000 | 2.63620e-30 | 1.00000 |
| rad5      | 6.58432e-31 | 1.00000 | 6.58432e-31 | 1.00000 |
| rad20     | 3.57075e-31 | 1.00000 | 3.57075e-31 | 1.00000 |
| rad21     | 2.76400e-31 | 1.00000 | 2.76400e-31 | 1.00000 |
| rad12     | 2.14072e-31 | 1.00000 | 2.14072e-31 | 1.00000 |
| rad18     | 2.60939e-33 | 1.00000 | 2.60939e-33 | 1.00000 |
| rad19syn  | 1.76219e-33 | 1.00000 | 1.76219e-33 | 1.00000 |
| rad24     | 1.77216e-36 | 1.00000 | 1.77216e-36 | 1.00000 |
| rad8      | 2.46430e-58 | 1.00000 | 2.46430e-58 | 1.00000 |

0.100000000E-01 Pa, 260.00000 K

| Rate constant             | True (fraction)        | Effective (fraction)   |
|---------------------------|------------------------|------------------------|
| Total                     | 2.97464e-14 (1.00 )    | 2.97464e-14 (1.00 )    |
| Formation of rad19        | 2.97293e-14 (0.999 )   | 2.97293e-14 (0.999 )   |
| H-abstraction to cyc2enyl | 1.70236e-17 (0.000572) | 1.70236e-17 (0.000572) |
| H-abstraction to cyclenyl | 3.02186e-20 (1.02e-06) | 3.02186e-20 (1.02e-06) |

| species                       | PYtrue      | Cumul    | PYeffective | Cumul    |
|-------------------------------|-------------|----------|-------------|----------|
| Indene+H                      | 0.998946    | 0.998946 | 0.998946    | 0.998946 |
| Benzene+cycloprop-2-enylidene | 0.000572291 | 0.999518 | 0.000572291 | 0.999518 |
| PhCHCCH2+H                    | 0.000453837 | 0.999972 | 0.000453837 | 0.999972 |
| PhCCH+CH3                     | 8.16475e-06 | 0.999980 | 8.16475e-06 | 0.999980 |
| C2H2+PhCH2                    | 6.95198e-06 | 0.999987 | 6.95198e-06 | 0.999987 |
| PhCCCH3+H                     | 5.02922e-06 | 0.999992 | 5.02922e-06 | 0.999992 |
| Ph+MeAc                       | 4.52038e-06 | 0.999997 | 4.52038e-06 | 0.999997 |
| rad67                         | 1.30782e-06 | 0.999998 | 1.30782e-06 | 0.999998 |
| Benzene+cycloprop-1-enylidene | 1.01588e-06 | 0.999999 | 1.01588e-06 | 0.999999 |
| Ph+Allene                     | 5.88244e-07 | 1.000000 | 5.88244e-07 | 1.000000 |
| rad35                         | 5.55442e-07 | 1.000000 | 5.55442e-07 | 1.000000 |
| PhCH2CCH+H                    | 9.16987e-08 | 1.000000 | 9.16987e-08 | 1.000000 |
| PAH7+H                        | 6.22660e-08 | 1.000000 | 6.22660e-08 | 1.000000 |
| rad39                         | 1.75110e-08 | 1.000000 | 1.75110e-08 | 1.000000 |
| rad37                         | 1.74307e-08 | 1.000000 | 1.74307e-08 | 1.000000 |
| rad30                         | 1.07726e-08 | 1.000000 | 1.07726e-08 | 1.000000 |
| PAH9+H                        | 9.70427e-10 | 1.000000 | 9.70427e-10 | 1.000000 |
| rad38                         | 4.76042e-10 | 1.000000 | 4.76042e-10 | 1.000000 |
| PhcycC3H3_A+H                 | 9.76895e-11 | 1.000000 | 9.76895e-11 | 1.000000 |
| PAH10+CH3                     | 8.98918e-11 | 1.000000 | 8.98918e-11 | 1.000000 |
| rad60syn                      | 7.17301e-11 | 1.000000 | 7.17301e-11 | 1.000000 |
| PAH3+H                        | 4.92667e-11 | 1.000000 | 4.92667e-11 | 1.000000 |
| rad60anti                     | 3.63886e-11 | 1.000000 | 3.63886e-11 | 1.000000 |
| rad46                         | 3.17698e-11 | 1.000000 | 3.17698e-11 | 1.000000 |
| rad59                         | 9.35837e-12 | 1.000000 | 9.35837e-12 | 1.000000 |
| rad54                         | 3.26556e-12 | 1.000000 | 3.26556e-12 | 1.000000 |
| rad43                         | 2.89792e-12 | 1.000000 | 2.89792e-12 | 1.000000 |
| Phenyl+cycC3H4                | 1.79997e-12 | 1.000000 | 0.000000    | 1.000000 |
| PhcycC3H3_B+H                 | 1.72357e-12 | 1.000000 | 1.72357e-12 | 1.000000 |
| rad62                         | 6.47645e-13 | 1.000000 | 6.47645e-13 | 1.000000 |
| rad50                         | 4.63331e-13 | 1.000000 | 4.63331e-13 | 1.000000 |
| rad70                         | 1.13349e-13 | 1.000000 | 1.13349e-13 | 1.000000 |
| PAH1+H                        | 6.48294e-14 | 1.000000 | 6.48294e-14 | 1.000000 |
| rad55                         | 5.00572e-14 | 1.000000 | 5.00572e-14 | 1.000000 |
| rad52                         | 5.32708e-15 | 1.000000 | 5.32708e-15 | 1.000000 |
| rad58                         | 3.93906e-15 | 1.000000 | 3.93906e-15 | 1.000000 |
| rad34                         | 3.66896e-15 | 1.000000 | 3.66896e-15 | 1.000000 |
| rad51                         | 2.62414e-15 | 1.000000 | 2.62414e-15 | 1.000000 |
| rad41                         | 1.01298e-15 | 1.000000 | 1.01298e-15 | 1.000000 |
| rad42                         | 5.81824e-16 | 1.000000 | 5.81824e-16 | 1.000000 |
| rad65                         | 6.97262e-17 | 1.000000 | 6.97262e-17 | 1.000000 |
| rad6                          | 3.97003e-17 | 1.000000 | 3.97003e-17 | 1.000000 |
| rad53                         | 1.97684e-17 | 1.000000 | 1.97684e-17 | 1.000000 |
| rad64                         | 6.46443e-18 | 1.000000 | 6.46443e-18 | 1.000000 |
| rad61                         | 2.22241e-18 | 1.000000 | 2.22241e-18 | 1.000000 |
| rad56                         | 1.96474e-19 | 1.000000 | 1.96474e-19 | 1.000000 |

|           |             |         |             |         |
|-----------|-------------|---------|-------------|---------|
| rad28     | 3.48183e-20 | 1.00000 | 3.48183e-20 | 1.00000 |
| rad2      | 2.72536e-20 | 1.00000 | 2.72536e-20 | 1.00000 |
| rad68syn  | 2.54594e-20 | 1.00000 | 2.54594e-20 | 1.00000 |
| rad68anti | 1.89229e-20 | 1.00000 | 1.89229e-20 | 1.00000 |
| rad26     | 5.05598e-21 | 1.00000 | 5.05598e-21 | 1.00000 |
| rad7      | 3.35039e-21 | 1.00000 | 3.35039e-21 | 1.00000 |
| rad1      | 1.96334e-21 | 1.00000 | 1.96334e-21 | 1.00000 |
| rad10     | 1.48177e-21 | 1.00000 | 1.48177e-21 | 1.00000 |
| rad11     | 8.50273e-22 | 1.00000 | 8.50273e-22 | 1.00000 |
| rad40syn  | 4.46768e-22 | 1.00000 | 4.46768e-22 | 1.00000 |
| rad40anti | 3.55542e-22 | 1.00000 | 3.55542e-22 | 1.00000 |
| rad3      | 1.79953e-22 | 1.00000 | 1.79953e-22 | 1.00000 |
| PAH8+H    | 9.71737e-23 | 1.00000 | 9.71737e-23 | 1.00000 |
| rad9      | 9.60141e-23 | 1.00000 | 9.60141e-23 | 1.00000 |
| rad4      | 9.41170e-23 | 1.00000 | 9.41170e-23 | 1.00000 |
| rad73     | 1.79326e-23 | 1.00000 | 1.79326e-23 | 1.00000 |
| rad13     | 1.70003e-23 | 1.00000 | 1.70003e-23 | 1.00000 |
| rad19anti | 2.64159e-24 | 1.00000 | 2.64159e-24 | 1.00000 |
| rad71     | 2.10924e-25 | 1.00000 | 2.10924e-25 | 1.00000 |
| rad15     | 4.30576e-26 | 1.00000 | 4.30576e-26 | 1.00000 |
| rad33     | 3.29461e-26 | 1.00000 | 3.29461e-26 | 1.00000 |
| rad14     | 1.85635e-26 | 1.00000 | 1.85635e-26 | 1.00000 |
| rad27     | 1.64779e-26 | 1.00000 | 1.64779e-26 | 1.00000 |
| rad25     | 1.15892e-26 | 1.00000 | 1.15892e-26 | 1.00000 |
| rad23     | 7.97877e-27 | 1.00000 | 7.97877e-27 | 1.00000 |
| rad47     | 1.37356e-27 | 1.00000 | 1.37356e-27 | 1.00000 |
| rad45     | 8.61957e-29 | 1.00000 | 8.61957e-29 | 1.00000 |
| rad36     | 5.49858e-30 | 1.00000 | 5.49858e-30 | 1.00000 |
| rad31     | 4.73749e-30 | 1.00000 | 4.73749e-30 | 1.00000 |
| rad22     | 3.76233e-30 | 1.00000 | 3.76233e-30 | 1.00000 |
| rad5      | 5.87323e-31 | 1.00000 | 5.87323e-31 | 1.00000 |
| rad12     | 5.49086e-31 | 1.00000 | 5.49086e-31 | 1.00000 |
| rad20     | 3.12795e-31 | 1.00000 | 3.12795e-31 | 1.00000 |
| rad21     | 2.43254e-31 | 1.00000 | 2.43254e-31 | 1.00000 |
| rad19syn  | 7.46104e-33 | 1.00000 | 7.46104e-33 | 1.00000 |
| rad18     | 2.22944e-33 | 1.00000 | 2.22944e-33 | 1.00000 |
| rad24     | 1.40527e-36 | 1.00000 | 1.40527e-36 | 1.00000 |
| rad8      | 4.69589e-58 | 1.00000 | 4.69589e-58 | 1.00000 |

0.100000000E-01 Pa, 270.000000 K

| Rate constant             | True (fraction)        | Effective (fraction)   |
|---------------------------|------------------------|------------------------|
| Total                     | 3.24655e-14 (1.00 )    | 3.24655e-14 (1.00 )    |
| Formation of rad19        | 3.24415e-14 (0.999 )   | 3.24415e-14 (0.999 )   |
| H-abstraction to cyc2enyl | 2.38790e-17 (0.000736) | 2.38790e-17 (0.000736) |
| H-abstraction to cyc1enyl | 5.45397e-20 (1.68e-06) | 5.45397e-20 (1.68e-06) |

| species                       | PYtrue      | Cumul    | PYeffective | Cumul    |
|-------------------------------|-------------|----------|-------------|----------|
| Indene+H                      | 0.998755    | 0.998755 | 0.998755    | 0.998755 |
| Benzene+cycloprop-2-enylidene | 0.000735519 | 0.999491 | 0.000735519 | 0.999491 |
| PhCHCCH2+H                    | 0.000478136 | 0.999969 | 0.000478136 | 0.999969 |
| PhCCH+CH3                     | 8.60828e-06 | 0.999977 | 8.60828e-06 | 0.999977 |
| C2H2+PhCH2                    | 7.43856e-06 | 0.999985 | 7.43856e-06 | 0.999985 |
| PhCCCH3+H                     | 5.34276e-06 | 0.999990 | 5.34276e-06 | 0.999990 |
| Ph+MeAc                       | 4.86918e-06 | 0.999995 | 4.86918e-06 | 0.999995 |
| Benzene+cycloprop-1-enylidene | 1.67993e-06 | 0.999997 | 1.67993e-06 | 0.999997 |
| rad67                         | 1.40521e-06 | 0.999998 | 1.40521e-06 | 0.999998 |
| Ph+Allene                     | 6.53816e-07 | 0.999999 | 6.53816e-07 | 0.999999 |
| rad35                         | 5.95101e-07 | 0.999999 | 5.95101e-07 | 0.999999 |
| PhCH2CCH+H                    | 1.03762e-07 | 1.000000 | 1.03762e-07 | 1.000000 |
| PAH7+H                        | 6.80575e-08 | 1.000000 | 6.80575e-08 | 1.000000 |
| rad37                         | 1.91533e-08 | 1.000000 | 1.91533e-08 | 1.000000 |
| rad39                         | 1.91245e-08 | 1.000000 | 1.91245e-08 | 1.000000 |
| rad30                         | 1.15866e-08 | 1.000000 | 1.15866e-08 | 1.000000 |
| PAH9+H                        | 1.07045e-09 | 1.000000 | 1.07045e-09 | 1.000000 |
| rad38                         | 5.31903e-10 | 1.000000 | 5.31903e-10 | 1.000000 |
| PhcycC3H3_A+H                 | 1.30537e-10 | 1.000000 | 1.30537e-10 | 1.000000 |
| PAH10+CH3                     | 1.09126e-10 | 1.000000 | 1.09126e-10 | 1.000000 |
| rad60syn                      | 7.96506e-11 | 1.000000 | 7.96506e-11 | 1.000000 |
| PAH3+H                        | 5.69526e-11 | 1.000000 | 5.69526e-11 | 1.000000 |
| rad60anti                     | 4.05206e-11 | 1.000000 | 4.05206e-11 | 1.000000 |
| rad46                         | 3.57378e-11 | 1.000000 | 3.57378e-11 | 1.000000 |
| rad59                         | 1.07434e-11 | 1.000000 | 1.07434e-11 | 1.000000 |
| rad54                         | 3.96279e-12 | 1.000000 | 3.96279e-12 | 1.000000 |
| rad43                         | 3.41945e-12 | 1.000000 | 3.41945e-12 | 1.000000 |
| PhcycC3H3_B+H                 | 2.69150e-12 | 1.000000 | 2.69150e-12 | 1.000000 |
| Phenyl+cycC3H4                | 2.60320e-12 | 1.000000 | 0.000000    | 1.000000 |
| rad62                         | 7.63412e-13 | 1.000000 | 7.63412e-13 | 1.000000 |



|           |             |          |             |          |
|-----------|-------------|----------|-------------|----------|
| rad50     | 5.53080e-13 | 1.000000 | 5.53080e-13 | 1.000000 |
| rad70     | 1.44220e-13 | 1.000000 | 1.44220e-13 | 1.000000 |
| PAH1+H    | 8.70221e-14 | 1.000000 | 8.70221e-14 | 1.000000 |
| rad55     | 6.36094e-14 | 1.000000 | 6.36094e-14 | 1.000000 |
| rad52     | 6.62632e-15 | 1.000000 | 6.62632e-15 | 1.000000 |
| rad58     | 5.12890e-15 | 1.000000 | 5.12890e-15 | 1.000000 |
| rad34     | 4.94708e-15 | 1.000000 | 4.94708e-15 | 1.000000 |
| rad51     | 3.41381e-15 | 1.000000 | 3.41381e-15 | 1.000000 |
| rad41     | 1.38720e-15 | 1.000000 | 1.38720e-15 | 1.000000 |
| rad42     | 7.76437e-16 | 1.000000 | 7.76437e-16 | 1.000000 |
| rad65     | 9.19939e-17 | 1.000000 | 9.19939e-17 | 1.000000 |
| rad6      | 3.25133e-17 | 1.000000 | 3.25133e-17 | 1.000000 |
| rad53     | 3.15309e-17 | 1.000000 | 3.15309e-17 | 1.000000 |
| rad64     | 1.06951e-17 | 1.000000 | 1.06951e-17 | 1.000000 |
| rad61     | 4.14923e-18 | 1.000000 | 4.14923e-18 | 1.000000 |
| rad56     | 3.86571e-19 | 1.000000 | 3.86571e-19 | 1.000000 |
| rad68syn  | 5.09087e-20 | 1.000000 | 5.09087e-20 | 1.000000 |
| rad68anti | 3.76429e-20 | 1.000000 | 3.76429e-20 | 1.000000 |
| rad28     | 2.84655e-20 | 1.000000 | 2.84655e-20 | 1.000000 |
| rad2      | 2.26024e-20 | 1.000000 | 2.26024e-20 | 1.000000 |
| rad26     | 4.32884e-21 | 1.000000 | 4.32884e-21 | 1.000000 |
| rad7      | 2.74099e-21 | 1.000000 | 2.74099e-21 | 1.000000 |
| rad1      | 1.64993e-21 | 1.000000 | 1.64993e-21 | 1.000000 |
| rad10     | 1.22913e-21 | 1.000000 | 1.22913e-21 | 1.000000 |
| rad40syn  | 1.04535e-21 | 1.000000 | 1.04535e-21 | 1.000000 |
| rad40anti | 8.30217e-22 | 1.000000 | 8.30217e-22 | 1.000000 |
| rad11     | 6.95783e-22 | 1.000000 | 6.95783e-22 | 1.000000 |
| rad9      | 2.62836e-22 | 1.000000 | 2.62836e-22 | 1.000000 |
| PAH8+H    | 2.52752e-22 | 1.000000 | 2.52752e-22 | 1.000000 |
| rad3      | 1.48881e-22 | 1.000000 | 1.48881e-22 | 1.000000 |
| rad4      | 7.81572e-23 | 1.000000 | 7.81572e-23 | 1.000000 |
| rad73     | 4.24223e-23 | 1.000000 | 4.24223e-23 | 1.000000 |
| rad13     | 1.39901e-23 | 1.000000 | 1.39901e-23 | 1.000000 |
| rad19anti | 9.69373e-24 | 1.000000 | 9.69373e-24 | 1.000000 |
| rad71     | 5.73563e-25 | 1.000000 | 5.73563e-25 | 1.000000 |
| rad15     | 1.18069e-25 | 1.000000 | 1.18069e-25 | 1.000000 |
| rad33     | 2.71875e-26 | 1.000000 | 2.71875e-26 | 1.000000 |
| rad14     | 1.54405e-26 | 1.000000 | 1.54405e-26 | 1.000000 |
| rad27     | 1.37466e-26 | 1.000000 | 1.37466e-26 | 1.000000 |
| rad25     | 9.54608e-27 | 1.000000 | 9.54608e-27 | 1.000000 |
| rad23     | 6.43668e-27 | 1.000000 | 6.43668e-27 | 1.000000 |
| rad47     | 1.61883e-27 | 1.000000 | 1.61883e-27 | 1.000000 |
| rad45     | 6.95766e-29 | 1.000000 | 6.95766e-29 | 1.000000 |
| rad31     | 1.15938e-29 | 1.000000 | 1.15938e-29 | 1.000000 |
| rad36     | 4.46710e-30 | 1.000000 | 4.46710e-30 | 1.000000 |
| rad22     | 3.02256e-30 | 1.000000 | 3.02256e-30 | 1.000000 |
| rad12     | 1.52811e-30 | 1.000000 | 1.52811e-30 | 1.000000 |
| rad5      | 5.25944e-31 | 1.000000 | 5.25944e-31 | 1.000000 |
| rad20     | 2.81193e-31 | 1.000000 | 2.81193e-31 | 1.000000 |
| rad21     | 2.19757e-31 | 1.000000 | 2.19757e-31 | 1.000000 |
| rad19syn  | 3.27847e-32 | 1.000000 | 3.27847e-32 | 1.000000 |
| rad18     | 1.95458e-33 | 1.000000 | 1.95458e-33 | 1.000000 |
| rad24     | 1.16160e-36 | 1.000000 | 1.16160e-36 | 1.000000 |
| rad8      | 9.15840e-58 | 1.000000 | 9.15840e-58 | 1.000000 |

0.100000000E-01 Pa, 280.000000 K

| Rate constant             | True (fraction)        | Effective (fraction)   |
|---------------------------|------------------------|------------------------|
| Total                     | 3.52572e-14 (1.00 )    | 3.52572e-14 (1.00 )    |
| Formation of rad19        | 3.52244e-14 (0.999 )   | 3.52244e-14 (0.999 )   |
| H-abstraction to cyc2enyl | 3.26639e-17 (0.000926) | 3.26639e-17 (0.000926) |
| H-abstraction to cyclenyl | 9.42926e-20 (2.67e-06) | 9.42926e-20 (2.67e-06) |

| species                       | PYtrue      | Cumul    | PYeffective | Cumul    |
|-------------------------------|-------------|----------|-------------|----------|
| Indene+H                      | 0.998535    | 0.998535 | 0.998535    | 0.998535 |
| Benzene+cycloprop-2-enylidene | 0.000926445 | 0.999462 | 0.000926445 | 0.999462 |
| PhCHCCH2+H                    | 0.000504644 | 0.999966 | 0.000504644 | 0.999966 |
| PhCCH+CH3                     | 9.08987e-06 | 0.999976 | 9.08987e-06 | 0.999976 |
| C2H2+PhCH2                    | 7.97642e-06 | 0.999984 | 7.97642e-06 | 0.999984 |
| PhCCCH3+H                     | 5.68666e-06 | 0.999989 | 5.68666e-06 | 0.999989 |
| Ph+MeAc                       | 5.25678e-06 | 0.999994 | 5.25678e-06 | 0.999994 |
| Benzene+cycloprop-1-enylidene | 2.67442e-06 | 0.999997 | 2.67442e-06 | 0.999997 |
| rad67                         | 1.51336e-06 | 0.999999 | 1.51336e-06 | 0.999999 |
| Ph+Allene                     | 7.29079e-07 | 0.999999 | 7.29079e-07 | 0.999999 |
| rad35                         | 6.39031e-07 | 1.00000  | 6.39031e-07 | 1.00000  |
| PhCH2CCH+H                    | 1.17844e-07 | 1.00000  | 1.17844e-07 | 1.00000  |
| PAH7+H                        | 7.45948e-08 | 1.00000  | 7.45948e-08 | 1.00000  |
| rad37                         | 2.11084e-08 | 1.00000  | 2.11084e-08 | 1.00000  |

|                |             |         |             |         |
|----------------|-------------|---------|-------------|---------|
| rad39          | 2.09426e-08 | 1.00000 | 2.09426e-08 | 1.00000 |
| rad30          | 1.24934e-08 | 1.00000 | 1.24934e-08 | 1.00000 |
| PAH9+H         | 1.18483e-09 | 1.00000 | 1.18483e-09 | 1.00000 |
| rad38          | 5.96671e-10 | 1.00000 | 5.96671e-10 | 1.00000 |
| PhcycC3H3_A+H  | 1.74264e-10 | 1.00000 | 1.74264e-10 | 1.00000 |
| PAH10+CH3      | 1.33020e-10 | 1.00000 | 1.33020e-10 | 1.00000 |
| rad60syn       | 8.87545e-11 | 1.00000 | 8.87545e-11 | 1.00000 |
| PAH3+H         | 6.61279e-11 | 1.00000 | 6.61279e-11 | 1.00000 |
| rad60anti      | 4.52825e-11 | 1.00000 | 4.52825e-11 | 1.00000 |
| rad46          | 4.03631e-11 | 1.00000 | 4.03631e-11 | 1.00000 |
| rad59          | 1.23852e-11 | 1.00000 | 1.23852e-11 | 1.00000 |
| rad54          | 4.82873e-12 | 1.00000 | 4.82873e-12 | 1.00000 |
| PhcycC3H3_B+H  | 4.15198e-12 | 1.00000 | 4.15198e-12 | 1.00000 |
| rad43          | 4.04915e-12 | 1.00000 | 4.04915e-12 | 1.00000 |
| Phenyl+cycC3H4 | 3.74742e-12 | 1.00000 | 0.00000     | 1.00000 |
| rad62          | 9.02622e-13 | 1.00000 | 9.02622e-13 | 1.00000 |
| rad50          | 6.63706e-13 | 1.00000 | 6.63706e-13 | 1.00000 |
| rad70          | 1.84124e-13 | 1.00000 | 1.84124e-13 | 1.00000 |
| PAH1+H         | 1.16979e-13 | 1.00000 | 1.16979e-13 | 1.00000 |
| rad55          | 8.10941e-14 | 1.00000 | 8.10941e-14 | 1.00000 |
| rad52          | 8.28731e-15 | 1.00000 | 8.28731e-15 | 1.00000 |
| rad58          | 6.70075e-15 | 1.00000 | 6.70075e-15 | 1.00000 |
| rad34          | 6.67995e-15 | 1.00000 | 6.67995e-15 | 1.00000 |
| rad51          | 4.46326e-15 | 1.00000 | 4.46326e-15 | 1.00000 |
| rad41          | 1.89769e-15 | 1.00000 | 1.89769e-15 | 1.00000 |
| rad42          | 1.03544e-15 | 1.00000 | 1.03544e-15 | 1.00000 |
| rad65          | 1.21893e-16 | 1.00000 | 1.21893e-16 | 1.00000 |
| rad53          | 4.97595e-17 | 1.00000 | 4.97595e-17 | 1.00000 |
| rad6           | 2.74605e-17 | 1.00000 | 2.74605e-17 | 1.00000 |
| rad64          | 1.74286e-17 | 1.00000 | 1.74286e-17 | 1.00000 |
| rad61          | 7.53743e-18 | 1.00000 | 7.53743e-18 | 1.00000 |
| rad56          | 7.36073e-19 | 1.00000 | 7.36073e-19 | 1.00000 |
| rad68syn       | 9.82844e-20 | 1.00000 | 9.82844e-20 | 1.00000 |
| rad68anti      | 7.23353e-20 | 1.00000 | 7.23353e-20 | 1.00000 |
| rad28          | 2.39727e-20 | 1.00000 | 2.39727e-20 | 1.00000 |
| rad2           | 1.95890e-20 | 1.00000 | 1.95890e-20 | 1.00000 |
| rad26          | 3.93057e-21 | 1.00000 | 3.93057e-21 | 1.00000 |
| rad7           | 2.31297e-21 | 1.00000 | 2.31297e-21 | 1.00000 |
| rad40syn       | 2.31271e-21 | 1.00000 | 2.31271e-21 | 1.00000 |
| rad40anti      | 1.83324e-21 | 1.00000 | 1.83324e-21 | 1.00000 |
| rad1           | 1.45037e-21 | 1.00000 | 1.45037e-21 | 1.00000 |
| rad10          | 1.06560e-21 | 1.00000 | 1.06560e-21 | 1.00000 |
| rad9           | 7.56670e-22 | 1.00000 | 7.56670e-22 | 1.00000 |
| PAH8+H         | 6.12375e-22 | 1.00000 | 6.12375e-22 | 1.00000 |
| rad11          | 5.87309e-22 | 1.00000 | 5.87309e-22 | 1.00000 |
| rad3           | 1.28377e-22 | 1.00000 | 1.28377e-22 | 1.00000 |
| rad73          | 9.49832e-23 | 1.00000 | 9.49832e-23 | 1.00000 |
| rad4           | 6.76648e-23 | 1.00000 | 6.76648e-23 | 1.00000 |
| rad19anti      | 3.60175e-23 | 1.00000 | 3.60175e-23 | 1.00000 |
| rad13          | 1.18755e-23 | 1.00000 | 1.18755e-23 | 1.00000 |
| rad71          | 1.44413e-24 | 1.00000 | 1.44413e-24 | 1.00000 |
| rad15          | 3.40518e-25 | 1.00000 | 3.40518e-25 | 1.00000 |
| rad33          | 2.31460e-26 | 1.00000 | 2.31460e-26 | 1.00000 |
| rad14          | 1.33855e-26 | 1.00000 | 1.33855e-26 | 1.00000 |
| rad27          | 1.19881e-26 | 1.00000 | 1.19881e-26 | 1.00000 |
| rad25          | 8.11116e-27 | 1.00000 | 8.11116e-27 | 1.00000 |
| rad23          | 5.50679e-27 | 1.00000 | 5.50679e-27 | 1.00000 |
| rad47          | 1.94320e-27 | 1.00000 | 1.94320e-27 | 1.00000 |
| rad45          | 5.96012e-29 | 1.00000 | 5.96012e-29 | 1.00000 |
| rad31          | 3.34216e-29 | 1.00000 | 3.34216e-29 | 1.00000 |
| rad12          | 4.47721e-30 | 1.00000 | 4.47721e-30 | 1.00000 |
| rad36          | 3.85379e-30 | 1.00000 | 3.85379e-30 | 1.00000 |
| rad22          | 2.56386e-30 | 1.00000 | 2.56386e-30 | 1.00000 |
| rad5           | 4.72722e-31 | 1.00000 | 4.72722e-31 | 1.00000 |
| rad20          | 2.61515e-31 | 1.00000 | 2.61515e-31 | 1.00000 |
| rad21          | 2.05440e-31 | 1.00000 | 2.05440e-31 | 1.00000 |
| rad19syn       | 1.48909e-31 | 1.00000 | 1.48909e-31 | 1.00000 |
| rad18          | 1.77234e-33 | 1.00000 | 1.77234e-33 | 1.00000 |
| rad24          | 1.02034e-36 | 1.00000 | 1.02034e-36 | 1.00000 |
| rad8           | 1.82925e-57 | 1.00000 | 1.82925e-57 | 1.00000 |

0.100000000E-01 Pa, 290.000000 K

| Rate constant             | True (fraction)        | Effective (fraction)   |
|---------------------------|------------------------|------------------------|
| Total                     | 3.81171e-14 (1.00 )    | 3.81171e-14 (1.00 )    |
| Formation of rad19        | 3.80733e-14 (0.999 )   | 3.80733e-14 (0.999 )   |
| H-abstraction to cyc2enyl | 4.36868e-17 (0.00115 ) | 4.36868e-17 (0.00115 ) |
| H-abstraction to cyclenyl | 1.56861e-19 (4.12e-06) | 1.56861e-19 (4.12e-06) |

| species                       | PYtrue      | Cumul    | PYeffective | Cumul    |
|-------------------------------|-------------|----------|-------------|----------|
| Indene+H                      | 0.998282    | 0.998282 | 0.998282    | 0.998282 |
| Benzene+cycloprop-2-enylidene | 0.00114612  | 0.999429 | 0.00114612  | 0.999429 |
| PhCHCCH2+H                    | 0.000533542 | 0.999962 | 0.000533542 | 0.999962 |
| PhCCH+CH3                     | 9.61228e-06 | 0.999972 | 9.61228e-06 | 0.999972 |
| C2H2+PhCH2                    | 8.57064e-06 | 0.999980 | 8.57064e-06 | 0.999980 |
| PhCCCH3+H                     | 6.06361e-06 | 0.999986 | 6.06361e-06 | 0.999986 |
| Ph+MeAc                       | 5.68730e-06 | 0.999992 | 5.68730e-06 | 0.999992 |
| Benzene+cycloprop-1-enylidene | 4.11523e-06 | 0.999996 | 4.11523e-06 | 0.999996 |
| rad67                         | 1.63342e-06 | 0.999998 | 1.63342e-06 | 0.999998 |
| Ph+Allene                     | 8.15472e-07 | 0.999999 | 8.15472e-07 | 0.999999 |
| rad35                         | 6.87674e-07 | 0.999999 | 6.87674e-07 | 0.999999 |
| PhCH2CCH+H                    | 1.34283e-07 | 0.999999 | 1.34283e-07 | 0.999999 |
| PAH7+H                        | 8.19725e-08 | 0.999999 | 8.19725e-08 | 0.999999 |
| rad37                         | 2.33275e-08 | 1.000000 | 2.33275e-08 | 1.000000 |
| rad39                         | 2.29907e-08 | 1.000000 | 2.29907e-08 | 1.000000 |
| rad30                         | 1.35037e-08 | 1.000000 | 1.35037e-08 | 1.000000 |
| PAH9+H                        | 1.31569e-09 | 1.000000 | 1.31569e-09 | 1.000000 |
| rad38                         | 6.71823e-10 | 1.000000 | 6.71823e-10 | 1.000000 |
| PhcycC3H3_A+H                 | 2.32248e-10 | 1.000000 | 2.32248e-10 | 1.000000 |
| PAH10+CH3                     | 1.62707e-10 | 1.000000 | 1.62707e-10 | 1.000000 |
| rad60syn                      | 9.92224e-11 | 1.000000 | 9.92224e-11 | 1.000000 |
| PAH3+H                        | 7.70899e-11 | 1.000000 | 7.70899e-11 | 1.000000 |
| rad60anti                     | 5.07726e-11 | 1.000000 | 5.07726e-11 | 1.000000 |
| rad46                         | 4.57582e-11 | 1.000000 | 4.57582e-11 | 1.000000 |
| rad59                         | 1.43327e-11 | 1.000000 | 1.43327e-11 | 1.000000 |
| PhcycC3H3_B+H                 | 6.32701e-12 | 1.000000 | 6.32701e-12 | 1.000000 |
| rad54                         | 5.90422e-12 | 1.000000 | 5.90422e-12 | 1.000000 |
| Phenyl+cycC3H4                | 5.36584e-12 | 1.000000 | 0.000000    | 1.000000 |
| rad43                         | 4.80936e-12 | 1.000000 | 4.80936e-12 | 1.000000 |
| rad62                         | 1.06993e-12 | 1.000000 | 1.06993e-12 | 1.000000 |
| rad50                         | 8.00223e-13 | 1.000000 | 8.00223e-13 | 1.000000 |
| rad70                         | 2.35660e-13 | 1.000000 | 2.35660e-13 | 1.000000 |
| PAH1+H                        | 1.57308e-13 | 1.000000 | 1.57308e-13 | 1.000000 |
| rad55                         | 1.03631e-13 | 1.000000 | 1.03631e-13 | 1.000000 |
| rad52                         | 1.04125e-14 | 1.000000 | 1.04125e-14 | 1.000000 |
| rad34                         | 9.02282e-15 | 1.000000 | 9.02282e-15 | 1.000000 |
| rad58                         | 8.77507e-15 | 1.000000 | 8.77507e-15 | 1.000000 |
| rad51                         | 5.85790e-15 | 1.000000 | 5.85790e-15 | 1.000000 |
| rad41                         | 2.59110e-15 | 1.000000 | 2.59110e-15 | 1.000000 |
| rad42                         | 1.37881e-15 | 1.000000 | 1.37881e-15 | 1.000000 |
| rad65                         | 1.62011e-16 | 1.000000 | 1.62011e-16 | 1.000000 |
| rad53                         | 7.76444e-17 | 1.000000 | 7.76444e-17 | 1.000000 |
| rad64                         | 2.79685e-17 | 1.000000 | 2.79685e-17 | 1.000000 |
| rad6                          | 2.41944e-17 | 1.000000 | 2.41944e-17 | 1.000000 |
| rad61                         | 1.33314e-17 | 1.000000 | 1.33314e-17 | 1.000000 |
| rad56                         | 1.35765e-18 | 1.000000 | 1.35765e-18 | 1.000000 |
| rad68syn                      | 1.83430e-19 | 1.000000 | 1.83430e-19 | 1.000000 |
| rad68anti                     | 1.34442e-19 | 1.000000 | 1.34442e-19 | 1.000000 |
| rad28                         | 2.10212e-20 | 1.000000 | 2.10212e-20 | 1.000000 |
| rad2                          | 1.81165e-20 | 1.000000 | 1.81165e-20 | 1.000000 |
| rad40syn                      | 4.85468e-21 | 1.000000 | 4.85468e-21 | 1.000000 |
| rad26                         | 3.86605e-21 | 1.000000 | 3.86605e-21 | 1.000000 |
| rad40anti                     | 3.84137e-21 | 1.000000 | 3.84137e-21 | 1.000000 |
| rad9                          | 2.24928e-21 | 1.000000 | 2.24928e-21 | 1.000000 |
| rad7                          | 2.03641e-21 | 1.000000 | 2.03641e-21 | 1.000000 |
| PAH8+H                        | 1.38956e-21 | 1.000000 | 1.38956e-21 | 1.000000 |
| rad1                          | 1.36187e-21 | 1.000000 | 1.36187e-21 | 1.000000 |
| rad10                         | 9.85943e-22 | 1.000000 | 9.85943e-22 | 1.000000 |
| rad11                         | 5.17270e-22 | 1.000000 | 5.17270e-22 | 1.000000 |
| rad73                         | 2.01830e-22 | 1.000000 | 2.01830e-22 | 1.000000 |
| rad19anti                     | 1.34645e-22 | 1.000000 | 1.34645e-22 | 1.000000 |
| rad3                          | 1.17593e-22 | 1.000000 | 1.17593e-22 | 1.000000 |
| rad4                          | 6.22486e-23 | 1.000000 | 6.22486e-23 | 1.000000 |
| rad13                         | 1.05180e-23 | 1.000000 | 1.05180e-23 | 1.000000 |
| rad71                         | 3.38779e-24 | 1.000000 | 3.38779e-24 | 1.000000 |
| rad15                         | 1.01417e-24 | 1.000000 | 1.01417e-24 | 1.000000 |
| rad33                         | 2.05640e-26 | 1.000000 | 2.05640e-26 | 1.000000 |
| rad14                         | 1.23240e-26 | 1.000000 | 1.23240e-26 | 1.000000 |
| rad27                         | 1.11594e-26 | 1.000000 | 1.11594e-26 | 1.000000 |
| rad25                         | 7.19130e-27 | 1.000000 | 7.19130e-27 | 1.000000 |
| rad23                         | 5.23528e-27 | 1.000000 | 5.23528e-27 | 1.000000 |
| rad47                         | 2.37746e-27 | 1.000000 | 2.37746e-27 | 1.000000 |
| rad31                         | 1.03460e-28 | 1.000000 | 1.03460e-28 | 1.000000 |
| rad45                         | 5.67832e-29 | 1.000000 | 5.67832e-29 | 1.000000 |
| rad12                         | 1.35604e-29 | 1.000000 | 1.35604e-29 | 1.000000 |
| rad36                         | 3.69998e-30 | 1.000000 | 3.69998e-30 | 1.000000 |
| rad22                         | 2.39133e-30 | 1.000000 | 2.39133e-30 | 1.000000 |
| rad19syn                      | 6.95957e-31 | 1.000000 | 6.95957e-31 | 1.000000 |

|       |             |          |             |          |
|-------|-------------|----------|-------------|----------|
| rad5  | 4.26405e-31 | 1.000000 | 4.26405e-31 | 1.000000 |
| rad20 | 2.54545e-31 | 1.000000 | 2.54545e-31 | 1.000000 |
| rad21 | 2.01062e-31 | 1.000000 | 2.01062e-31 | 1.000000 |
| rad18 | 1.68130e-33 | 1.000000 | 1.68130e-33 | 1.000000 |
| rad24 | 9.95730e-37 | 1.000000 | 9.95730e-37 | 1.000000 |
| rad8  | 3.74435e-57 | 1.000000 | 3.74435e-57 | 1.000000 |

0.100000000E-01 Pa, 300.000000 K

| Rate constant             | True (fraction)        | Effective (fraction)   |
|---------------------------|------------------------|------------------------|
| Total                     | 5.34809e-14 (1.00 )    | 5.34809e-14 (1.00 )    |
| Formation of rad19        | 5.34010e-14 (0.999 )   | 5.34010e-14 (0.999 )   |
| H-abstraction to cyc2enyl | 7.95823e-17 (0.00149 ) | 7.95823e-17 (0.00149 ) |
| H-abstraction to cyclenyl | 3.44981e-19 (6.45e-06) | 3.44981e-19 (6.45e-06) |

| species                       | PYtrue      | Cumul    | PYeffective | Cumul    |
|-------------------------------|-------------|----------|-------------|----------|
| Indene+H                      | 0.997939    | 0.997939 | 0.997939    | 0.997939 |
| Benzene+cycloprop-2-enylidene | 0.00148805  | 0.999427 | 0.00148805  | 0.999427 |
| PhCHCCH2+H                    | 0.000529808 | 0.999957 | 0.000529808 | 0.999957 |
| PhCCH+CH3                     | 1.04611e-05 | 0.999968 | 1.04611e-05 | 0.999968 |
| C2H2+PhCH2                    | 9.96171e-06 | 0.999978 | 9.96171e-06 | 0.999978 |
| Benzene+cycloprop-1-enylidene | 6.45054e-06 | 0.999984 | 6.45054e-06 | 0.999984 |
| PhCCCH3+H                     | 6.36709e-06 | 0.999990 | 6.36709e-06 | 0.999990 |
| Ph+MeAc                       | 5.99813e-06 | 0.999996 | 5.99813e-06 | 0.999996 |
| rad67                         | 1.76907e-06 | 0.999998 | 1.76907e-06 | 0.999998 |
| Ph+Allene                     | 8.18732e-07 | 0.999999 | 8.18732e-07 | 0.999999 |
| rad35                         | 7.31798e-07 | 1.000000 | 7.31798e-07 | 1.000000 |
| PhCH2CCH+H                    | 1.62417e-07 | 1.000000 | 1.62417e-07 | 1.000000 |
| PAH7+H                        | 1.00637e-07 | 1.000000 | 1.00637e-07 | 1.000000 |
| rad37                         | 2.83199e-08 | 1.000000 | 2.83199e-08 | 1.000000 |
| rad39                         | 2.48277e-08 | 1.000000 | 2.48277e-08 | 1.000000 |
| rad30                         | 1.39394e-08 | 1.000000 | 1.39394e-08 | 1.000000 |
| PAH9+H                        | 1.67863e-09 | 1.000000 | 1.67863e-09 | 1.000000 |
| rad38                         | 7.72523e-10 | 1.000000 | 7.72523e-10 | 1.000000 |
| PhcycC3H3_A+H                 | 3.25289e-10 | 1.000000 | 3.25289e-10 | 1.000000 |
| PAH10+CH3                     | 2.37260e-10 | 1.000000 | 2.37260e-10 | 1.000000 |
| rad60syn                      | 1.06830e-10 | 1.000000 | 1.06830e-10 | 1.000000 |
| PAH3+H                        | 9.84678e-11 | 1.000000 | 9.84678e-11 | 1.000000 |
| rad60anti                     | 5.51552e-11 | 1.000000 | 5.51552e-11 | 1.000000 |
| rad46                         | 5.45512e-11 | 1.000000 | 5.45512e-11 | 1.000000 |
| rad59                         | 1.67252e-11 | 1.000000 | 1.67252e-11 | 1.000000 |
| PhcycC3H3_B+H                 | 1.05896e-11 | 1.000000 | 1.05896e-11 | 1.000000 |
| Phenyl+cycC3H4                | 8.20984e-12 | 1.000000 | 0.000000    | 1.000000 |
| rad54                         | 7.66481e-12 | 1.000000 | 7.66481e-12 | 1.000000 |
| rad43                         | 5.65539e-12 | 1.000000 | 5.65539e-12 | 1.000000 |
| rad62                         | 1.25261e-12 | 1.000000 | 1.25261e-12 | 1.000000 |
| rad50                         | 1.03288e-12 | 1.000000 | 1.03288e-12 | 1.000000 |
| rad70                         | 3.13300e-13 | 1.000000 | 3.13300e-13 | 1.000000 |
| PAH1+H                        | 1.93736e-13 | 1.000000 | 1.93736e-13 | 1.000000 |
| rad55                         | 1.33795e-13 | 1.000000 | 1.33795e-13 | 1.000000 |
| rad52                         | 1.45686e-14 | 1.000000 | 1.45686e-14 | 1.000000 |
| rad34                         | 1.28491e-14 | 1.000000 | 1.28491e-14 | 1.000000 |
| rad58                         | 1.11202e-14 | 1.000000 | 1.11202e-14 | 1.000000 |
| rad51                         | 8.23783e-15 | 1.000000 | 8.23783e-15 | 1.000000 |
| rad6                          | 4.43647e-15 | 1.000000 | 4.43647e-15 | 1.000000 |
| rad41                         | 3.58180e-15 | 1.000000 | 3.58180e-15 | 1.000000 |
| rad42                         | 1.81911e-15 | 1.000000 | 1.81911e-15 | 1.000000 |
| rad65                         | 2.32603e-16 | 1.000000 | 2.32603e-16 | 1.000000 |
| rad53                         | 1.29467e-16 | 1.000000 | 1.29467e-16 | 1.000000 |
| rad64                         | 4.98930e-17 | 1.000000 | 4.98930e-17 | 1.000000 |
| rad61                         | 2.74866e-17 | 1.000000 | 2.74866e-17 | 1.000000 |
| rad9                          | 1.16397e-17 | 1.000000 | 1.16397e-17 | 1.000000 |
| rad2                          | 5.27481e-18 | 1.000000 | 5.27481e-18 | 1.000000 |
| rad28                         | 3.88646e-18 | 1.000000 | 3.88646e-18 | 1.000000 |
| rad56                         | 3.01523e-18 | 1.000000 | 3.01523e-18 | 1.000000 |
| rad19anti                     | 1.46925e-18 | 1.000000 | 1.46925e-18 | 1.000000 |
| rad26                         | 1.00746e-18 | 1.000000 | 1.00746e-18 | 1.000000 |
| rad7                          | 4.10235e-19 | 1.000000 | 4.10235e-19 | 1.000000 |
| rad1                          | 3.97478e-19 | 1.000000 | 3.97478e-19 | 1.000000 |
| rad68syn                      | 3.96648e-19 | 1.000000 | 3.96648e-19 | 1.000000 |
| rad10                         | 2.95351e-19 | 1.000000 | 2.95351e-19 | 1.000000 |
| rad68anti                     | 2.85691e-19 | 1.000000 | 2.85691e-19 | 1.000000 |
| rad11                         | 1.02192e-19 | 1.000000 | 1.02192e-19 | 1.000000 |
| rad3                          | 3.39887e-20 | 1.000000 | 3.39887e-20 | 1.000000 |
| rad4                          | 1.69027e-20 | 1.000000 | 1.69027e-20 | 1.000000 |
| rad40syn                      | 1.34592e-20 | 1.000000 | 1.34592e-20 | 1.000000 |
| rad40anti                     | 1.02812e-20 | 1.000000 | 1.02812e-20 | 1.000000 |
| rad15                         | 6.78058e-21 | 1.000000 | 6.78058e-21 | 1.000000 |

|          |             |         |             |         |
|----------|-------------|---------|-------------|---------|
| PAH8+H   | 5.53990e-21 | 1.00000 | 5.53990e-21 | 1.00000 |
| rad13    | 2.27241e-21 | 1.00000 | 2.27241e-21 | 1.00000 |
| rad23    | 8.56096e-22 | 1.00000 | 8.56096e-22 | 1.00000 |
| rad73    | 6.54879e-22 | 1.00000 | 6.54879e-22 | 1.00000 |
| rad71    | 2.13421e-23 | 1.00000 | 2.13421e-23 | 1.00000 |
| rad45    | 1.16993e-23 | 1.00000 | 1.16993e-23 | 1.00000 |
| rad33    | 5.45380e-24 | 1.00000 | 5.45380e-24 | 1.00000 |
| rad27    | 4.37501e-24 | 1.00000 | 4.37501e-24 | 1.00000 |
| rad14    | 3.97976e-24 | 1.00000 | 3.97976e-24 | 1.00000 |
| rad25    | 2.08522e-24 | 1.00000 | 2.08522e-24 | 1.00000 |
| rad31    | 9.70225e-25 | 1.00000 | 9.70225e-25 | 1.00000 |
| rad36    | 3.98746e-25 | 1.00000 | 3.98746e-25 | 1.00000 |
| rad22    | 3.33406e-25 | 1.00000 | 3.33406e-25 | 1.00000 |
| rad12    | 1.21895e-25 | 1.00000 | 1.21895e-25 | 1.00000 |
| rad19syn | 1.12386e-25 | 1.00000 | 1.12386e-25 | 1.00000 |
| rad5     | 2.68890e-26 | 1.00000 | 2.68890e-26 | 1.00000 |
| rad47    | 1.77240e-26 | 1.00000 | 1.77240e-26 | 1.00000 |
| rad21    | 1.67176e-27 | 1.00000 | 1.67176e-27 | 1.00000 |
| rad20    | 1.59727e-27 | 1.00000 | 1.59727e-27 | 1.00000 |
| rad18    | 5.36992e-29 | 1.00000 | 5.36992e-29 | 1.00000 |
| rad72    | 4.67286e-30 | 1.00000 | 4.67286e-30 | 1.00000 |
| rad24    | 2.26577e-31 | 1.00000 | 2.26577e-31 | 1.00000 |
| rad8     | 3.04477e-43 | 1.00000 | 3.04477e-43 | 1.00000 |

0.100000000E-01 Pa, 310.000000 K

| Rate constant             | True (fraction)        | Effective (fraction)   |
|---------------------------|------------------------|------------------------|
| Total                     | 5.92544e-14 (1.00 )    | 5.92544e-14 (1.00 )    |
| Formation of rad19        | 5.91462e-14 (0.998 )   | 5.91462e-14 (0.998 )   |
| H-abstraction to cyc2enyl | 1.07628e-16 (0.00182 ) | 1.07628e-16 (0.00182 ) |
| H-abstraction to cyclenyl | 5.62537e-19 (9.49e-06) | 5.62537e-19 (9.49e-06) |

| species                       | PYtrue      | Cumul    | PYeffective | Cumul    |
|-------------------------------|-------------|----------|-------------|----------|
| Indene+H                      | 0.997536    | 0.997536 | 0.997536    | 0.997536 |
| Benzene+cycloprop-2-enylidene | 0.00181637  | 0.999353 | 0.00181637  | 0.999353 |
| PhCHCCH2+H                    | 0.000599203 | 0.999952 | 0.000599203 | 0.999952 |
| PhCCH+CH3                     | 1.07895e-05 | 0.999963 | 1.07895e-05 | 0.999963 |
| C2H2+PhCH2                    | 9.94873e-06 | 0.999973 | 9.94873e-06 | 0.999973 |
| Benzene+cycloprop-1-enylidene | 9.49359e-06 | 0.999982 | 9.49359e-06 | 0.999982 |
| PhCCCH3+H                     | 6.92715e-06 | 0.999989 | 6.92715e-06 | 0.999989 |
| Ph+MeAc                       | 6.69418e-06 | 0.999996 | 6.69418e-06 | 0.999996 |
| rad67                         | 1.91401e-06 | 0.999998 | 1.91401e-06 | 0.999998 |
| Ph+Allene                     | 1.02818e-06 | 0.999999 | 1.02818e-06 | 0.999999 |
| rad35                         | 8.00924e-07 | 0.999999 | 8.00924e-07 | 0.999999 |
| PhCH2CCH+H                    | 1.75830e-07 | 1.000000 | 1.75830e-07 | 1.000000 |
| PAH7+H                        | 9.96594e-08 | 1.000000 | 9.96594e-08 | 1.000000 |
| rad37                         | 2.86975e-08 | 1.000000 | 2.86975e-08 | 1.000000 |
| rad39                         | 2.78855e-08 | 1.000000 | 2.78855e-08 | 1.000000 |
| rad30                         | 1.58788e-08 | 1.000000 | 1.58788e-08 | 1.000000 |
| PAH9+H                        | 1.63647e-09 | 1.000000 | 1.63647e-09 | 1.000000 |
| rad38                         | 8.60173e-10 | 1.000000 | 8.60173e-10 | 1.000000 |
| PhcycC3H3_A+H                 | 4.09101e-10 | 1.000000 | 4.09101e-10 | 1.000000 |
| PAH10+CH3                     | 2.45210e-10 | 1.000000 | 2.45210e-10 | 1.000000 |
| rad60syn                      | 1.25079e-10 | 1.000000 | 1.25079e-10 | 1.000000 |
| PAH3+H                        | 1.05822e-10 | 1.000000 | 1.05822e-10 | 1.000000 |
| rad60anti                     | 6.43905e-11 | 1.000000 | 6.43905e-11 | 1.000000 |
| rad46                         | 5.93901e-11 | 1.000000 | 5.93901e-11 | 1.000000 |
| rad59                         | 1.93806e-11 | 1.000000 | 1.93806e-11 | 1.000000 |
| PhcycC3H3_B+H                 | 1.41415e-11 | 1.000000 | 1.41415e-11 | 1.000000 |
| Phenyl+cycC3H4                | 1.07882e-11 | 1.000000 | 0.000000    | 1.000000 |
| rad54                         | 8.89111e-12 | 1.000000 | 8.89111e-12 | 1.000000 |
| rad43                         | 6.83040e-12 | 1.000000 | 6.83040e-12 | 1.000000 |
| rad62                         | 1.51134e-12 | 1.000000 | 1.51134e-12 | 1.000000 |
| rad50                         | 1.17654e-12 | 1.000000 | 1.17654e-12 | 1.000000 |
| rad70                         | 3.87383e-13 | 1.000000 | 3.87383e-13 | 1.000000 |
| PAH1+H                        | 2.83447e-13 | 1.000000 | 2.83447e-13 | 1.000000 |
| rad55                         | 1.69762e-13 | 1.000000 | 1.69762e-13 | 1.000000 |
| rad52                         | 1.66001e-14 | 1.000000 | 1.66001e-14 | 1.000000 |
| rad34                         | 1.63986e-14 | 1.000000 | 1.63986e-14 | 1.000000 |
| rad58                         | 1.50863e-14 | 1.000000 | 1.50863e-14 | 1.000000 |
| rad51                         | 1.01547e-14 | 1.000000 | 1.01547e-14 | 1.000000 |
| rad41                         | 4.78417e-15 | 1.000000 | 4.78417e-15 | 1.000000 |
| rad42                         | 2.42592e-15 | 1.000000 | 2.42592e-15 | 1.000000 |
| rad65                         | 2.87310e-16 | 1.000000 | 2.87310e-16 | 1.000000 |
| rad53                         | 1.82060e-16 | 1.000000 | 1.82060e-16 | 1.000000 |
| rad64                         | 6.86273e-17 | 1.000000 | 6.86273e-17 | 1.000000 |
| rad61                         | 3.85247e-17 | 1.000000 | 3.85247e-17 | 1.000000 |
| rad6                          | 2.26222e-17 | 1.000000 | 2.26222e-17 | 1.000000 |

|           |             |          |             |          |
|-----------|-------------|----------|-------------|----------|
| rad56     | 4.20686e-18 | 1.000000 | 4.20686e-18 | 1.000000 |
| rad68syn  | 5.79051e-19 | 1.000000 | 5.79051e-19 | 1.000000 |
| rad68anti | 4.21505e-19 | 1.000000 | 4.21505e-19 | 1.000000 |
| rad9      | 2.09457e-20 | 1.000000 | 2.09457e-20 | 1.000000 |
| rad2      | 2.08932e-20 | 1.000000 | 2.08932e-20 | 1.000000 |
| rad28     | 1.92793e-20 | 1.000000 | 1.92793e-20 | 1.000000 |
| rad40syn  | 1.84900e-20 | 1.000000 | 1.84900e-20 | 1.000000 |
| rad40anti | 1.45858e-20 | 1.000000 | 1.45858e-20 | 1.000000 |
| PAH8+H    | 5.99081e-21 | 1.000000 | 5.99081e-21 | 1.000000 |
| rad26     | 5.06723e-21 | 1.000000 | 5.06723e-21 | 1.000000 |
| rad7      | 1.90224e-21 | 1.000000 | 1.90224e-21 | 1.000000 |
| rad19anti | 1.86518e-21 | 1.000000 | 1.86518e-21 | 1.000000 |
| rad1      | 1.62403e-21 | 1.000000 | 1.62403e-21 | 1.000000 |
| rad10     | 1.13842e-21 | 1.000000 | 1.13842e-21 | 1.000000 |
| rad73     | 7.86869e-22 | 1.000000 | 7.86869e-22 | 1.000000 |
| rad11     | 4.83622e-22 | 1.000000 | 4.83622e-22 | 1.000000 |
| rad3      | 1.30461e-22 | 1.000000 | 1.30461e-22 | 1.000000 |
| rad4      | 6.97232e-23 | 1.000000 | 6.97232e-23 | 1.000000 |
| rad71     | 1.54146e-23 | 1.000000 | 1.54146e-23 | 1.000000 |
| rad13     | 9.94499e-24 | 1.000000 | 9.94499e-24 | 1.000000 |
| rad15     | 9.48376e-24 | 1.000000 | 9.48376e-24 | 1.000000 |
| rad33     | 1.95762e-26 | 1.000000 | 1.95762e-26 | 1.000000 |
| rad14     | 1.37562e-26 | 1.000000 | 1.37562e-26 | 1.000000 |
| rad27     | 1.30388e-26 | 1.000000 | 1.30388e-26 | 1.000000 |
| rad23     | 1.03795e-26 | 1.000000 | 1.03795e-26 | 1.000000 |
| rad25     | 6.81317e-27 | 1.000000 | 6.81317e-27 | 1.000000 |
| rad47     | 3.77720e-27 | 1.000000 | 3.77720e-27 | 1.000000 |
| rad31     | 1.07521e-27 | 1.000000 | 1.07521e-27 | 1.000000 |
| rad12     | 1.31593e-28 | 1.000000 | 1.31593e-28 | 1.000000 |
| rad45     | 1.13542e-28 | 1.000000 | 1.13542e-28 | 1.000000 |
| rad19syn  | 1.62279e-29 | 1.000000 | 1.62279e-29 | 1.000000 |
| rad36     | 7.52794e-30 | 1.000000 | 7.52794e-30 | 1.000000 |
| rad22     | 4.25347e-30 | 1.000000 | 4.25347e-30 | 1.000000 |
| rad5      | 3.50616e-31 | 1.000000 | 3.50616e-31 | 1.000000 |
| rad20     | 2.93460e-31 | 1.000000 | 2.93460e-31 | 1.000000 |
| rad21     | 2.34573e-31 | 1.000000 | 2.34573e-31 | 1.000000 |
| rad18     | 1.83801e-33 | 1.000000 | 1.83801e-33 | 1.000000 |
| rad24     | 2.02310e-36 | 1.000000 | 2.02310e-36 | 1.000000 |
| rad8      | 1.69330e-56 | 1.000000 | 1.69330e-56 | 1.000000 |

0.100000000E-01 Pa, 400.000000 K

| Rate constant             | True (fraction)        | Effective (fraction)   |
|---------------------------|------------------------|------------------------|
| Total                     | 1.29463e-13 (1.00 )    | 1.29463e-13 (1.00 )    |
| Formation of rad19        | 1.28526e-13 (0.993 )   | 1.28526e-13 (0.993 )   |
| H-abstraction to cyc2enyl | 9.19357e-16 (0.00710 ) | 9.19357e-16 (0.00710 ) |
| H-abstraction to cyclenyl | 1.69485e-17 (0.000131) | 1.69485e-17 (0.000131) |

| species                       | PYtrue      | Cumul    | PYeffective | Cumul    |
|-------------------------------|-------------|----------|-------------|----------|
| Indene+H                      | 0.991683    | 0.991683 | 0.991683    | 0.991683 |
| Benzene+cycloprop-2-enylidene | 0.00710133  | 0.998784 | 0.00710133  | 0.998784 |
| PhCHCCH2+H                    | 0.00100585  | 0.999790 | 0.00100585  | 0.999790 |
| Benzene+cycloprop-1-enylidene | 0.000130914 | 0.999921 | 0.000130914 | 0.999921 |
| C2H2+PhCH2                    | 2.22462e-05 | 0.999943 | 2.22462e-05 | 0.999943 |
| PhCCH+CH3                     | 1.95095e-05 | 0.999963 | 1.95095e-05 | 0.999963 |
| Ph+MeAc                       | 1.45178e-05 | 0.999977 | 1.45178e-05 | 0.999977 |
| PhCCCH3+H                     | 1.31951e-05 | 0.999990 | 1.31951e-05 | 0.999990 |
| rad67                         | 4.22165e-06 | 0.999994 | 4.22165e-06 | 0.999994 |
| Ph+Allene                     | 2.97365e-06 | 0.999997 | 2.97365e-06 | 0.999997 |
| rad35                         | 1.68908e-06 | 0.999999 | 1.68908e-06 | 0.999999 |
| PhCH2CCH+H                    | 6.92990e-07 | 1.000000 | 6.92990e-07 | 1.000000 |
| PAH7+H                        | 2.89732e-07 | 1.000000 | 2.89732e-07 | 1.000000 |
| rad37                         | 8.82199e-08 | 1.000000 | 8.82199e-08 | 1.000000 |
| rad39                         | 7.05126e-08 | 1.000000 | 7.05126e-08 | 1.000000 |
| rad30                         | 3.41243e-08 | 1.000000 | 3.41243e-08 | 1.000000 |
| PAH9+H                        | 5.67036e-09 | 1.000000 | 5.67036e-09 | 1.000000 |
| PhcycC3H3_A+H                 | 4.88900e-09 | 1.000000 | 4.88900e-09 | 1.000000 |
| rad38                         | 3.07423e-09 | 1.000000 | 3.07423e-09 | 1.000000 |
| PAH10+CH3                     | 1.94149e-09 | 1.000000 | 1.94149e-09 | 1.000000 |
| PAH3+H                        | 5.34444e-10 | 1.000000 | 5.34444e-10 | 1.000000 |
| PhcycC3H3_B+H                 | 4.15151e-10 | 1.000000 | 4.15151e-10 | 1.000000 |
| rad60syn                      | 3.79126e-10 | 1.000000 | 3.79126e-10 | 1.000000 |
| rad46                         | 2.31276e-10 | 1.000000 | 2.31276e-10 | 1.000000 |
| Phenyl+cycC3H4                | 2.22328e-10 | 1.000000 | 0.000000    | 1.000000 |
| rad60anti                     | 2.01848e-10 | 1.000000 | 2.01848e-10 | 1.000000 |
| rad59                         | 8.49292e-11 | 1.000000 | 8.49292e-11 | 1.000000 |
| rad54                         | 6.39645e-11 | 1.000000 | 6.39645e-11 | 1.000000 |
| rad43                         | 3.46931e-11 | 1.000000 | 3.46931e-11 | 1.000000 |

|           |             |         |             |         |
|-----------|-------------|---------|-------------|---------|
| rad50     | 8.28626e-12 | 1.00000 | 8.28626e-12 | 1.00000 |
| rad62     | 7.28442e-12 | 1.00000 | 7.28442e-12 | 1.00000 |
| rad70     | 3.85302e-12 | 1.00000 | 3.85302e-12 | 1.00000 |
| PAH1+H    | 3.60985e-12 | 1.00000 | 3.60985e-12 | 1.00000 |
| rad55     | 1.60041e-12 | 1.00000 | 1.60041e-12 | 1.00000 |
| rad34     | 2.43938e-13 | 1.00000 | 2.43938e-13 | 1.00000 |
| rad52     | 1.72568e-13 | 1.00000 | 1.72568e-13 | 1.00000 |
| rad58     | 1.69180e-13 | 1.00000 | 1.69180e-13 | 1.00000 |
| rad51     | 1.42859e-13 | 1.00000 | 1.42859e-13 | 1.00000 |
| rad41     | 6.83261e-14 | 1.00000 | 6.83261e-14 | 1.00000 |
| rad42     | 2.71727e-14 | 1.00000 | 2.71727e-14 | 1.00000 |
| rad9      | 2.61173e-14 | 1.00000 | 2.61173e-14 | 1.00000 |
| rad6      | 1.28607e-14 | 1.00000 | 1.28607e-14 | 1.00000 |
| rad53     | 6.87992e-15 | 1.00000 | 6.87992e-15 | 1.00000 |
| rad19anti | 4.76813e-15 | 1.00000 | 4.76813e-15 | 1.00000 |
| rad65     | 4.39158e-15 | 1.00000 | 4.39158e-15 | 1.00000 |
| rad61     | 3.43040e-15 | 1.00000 | 3.43040e-15 | 1.00000 |
| rad64     | 3.05822e-15 | 1.00000 | 3.05822e-15 | 1.00000 |
| rad56     | 5.30916e-16 | 1.00000 | 5.30916e-16 | 1.00000 |
| rad2      | 3.58982e-16 | 1.00000 | 3.58982e-16 | 1.00000 |
| rad68syn  | 7.48236e-17 | 1.00000 | 7.48236e-17 | 1.00000 |
| rad68anti | 5.24829e-17 | 1.00000 | 5.24829e-17 | 1.00000 |
| rad1      | 3.34082e-17 | 1.00000 | 3.34082e-17 | 1.00000 |
| rad23     | 2.73546e-17 | 1.00000 | 2.73546e-17 | 1.00000 |
| rad26     | 2.27390e-17 | 1.00000 | 2.27390e-17 | 1.00000 |
| rad10     | 2.04289e-17 | 1.00000 | 2.04289e-17 | 1.00000 |
| rad15     | 1.61590e-17 | 1.00000 | 1.61590e-17 | 1.00000 |
| rad28     | 7.91793e-18 | 1.00000 | 7.91793e-18 | 1.00000 |
| rad40syn  | 6.39134e-18 | 1.00000 | 6.39134e-18 | 1.00000 |
| PAH8+H    | 5.94556e-18 | 1.00000 | 5.94556e-18 | 1.00000 |
| rad40anti | 4.74375e-18 | 1.00000 | 4.74375e-18 | 1.00000 |
| rad3      | 2.47713e-18 | 1.00000 | 2.47713e-18 | 1.00000 |
| rad4      | 1.30459e-18 | 1.00000 | 1.30459e-18 | 1.00000 |
| rad7      | 1.23418e-18 | 1.00000 | 1.23418e-18 | 1.00000 |
| rad45     | 1.08318e-18 | 1.00000 | 1.08318e-18 | 1.00000 |
| rad73     | 4.85704e-19 | 1.00000 | 4.85704e-19 | 1.00000 |
| rad11     | 3.13944e-19 | 1.00000 | 3.13944e-19 | 1.00000 |
| rad71     | 4.97401e-20 | 1.00000 | 4.97401e-20 | 1.00000 |
| rad36     | 4.15553e-20 | 1.00000 | 4.15553e-20 | 1.00000 |
| rad19syn  | 2.04434e-20 | 1.00000 | 2.04434e-20 | 1.00000 |
| rad22     | 7.51789e-21 | 1.00000 | 7.51789e-21 | 1.00000 |
| rad13     | 7.35120e-21 | 1.00000 | 7.35120e-21 | 1.00000 |
| rad31     | 5.03912e-21 | 1.00000 | 5.03912e-21 | 1.00000 |
| rad12     | 4.44611e-22 | 1.00000 | 4.44611e-22 | 1.00000 |
| rad27     | 2.79894e-22 | 1.00000 | 2.79894e-22 | 1.00000 |
| rad14     | 1.66912e-22 | 1.00000 | 1.66912e-22 | 1.00000 |
| rad33     | 1.93160e-23 | 1.00000 | 1.93160e-23 | 1.00000 |
| rad25     | 6.73943e-24 | 1.00000 | 6.73943e-24 | 1.00000 |
| rad47     | 7.65130e-25 | 1.00000 | 7.65130e-25 | 1.00000 |
| rad72     | 7.35617e-25 | 1.00000 | 7.35617e-25 | 1.00000 |
| rad21     | 2.16599e-26 | 1.00000 | 2.16599e-26 | 1.00000 |
| rad20     | 1.95533e-26 | 1.00000 | 1.95533e-26 | 1.00000 |
| rad5      | 1.53994e-26 | 1.00000 | 1.53994e-26 | 1.00000 |
| rad24     | 8.03432e-27 | 1.00000 | 8.03432e-27 | 1.00000 |
| rad18     | 4.79642e-28 | 1.00000 | 4.79642e-28 | 1.00000 |
| rad8      | 6.65445e-40 | 1.00000 | 6.65445e-40 | 1.00000 |

0.100000000E-01 Pa, 500.000000 K

=====

| Rate constant             | True (fraction)        | Effective (fraction)   |
|---------------------------|------------------------|------------------------|
| Total                     | 2.52837e-13 (1.00 )    | 2.52837e-13 (1.00 )    |
| Formation of rad19        | 2.47941e-13 (0.981 )   | 2.47941e-13 (0.981 )   |
| H-abstraction to cyc2enyl | 4.69058e-15 (0.0186 )  | 4.69058e-15 (0.0186 )  |
| H-abstraction to cyc1enyl | 2.05381e-16 (0.000812) | 2.05381e-16 (0.000812) |

| species                       | PYtrue      | Cumul    | PYeffective | Cumul    |
|-------------------------------|-------------|----------|-------------|----------|
| Indene+H                      | 0.978428    | 0.978428 | 0.978428    | 0.978428 |
| Benzene+cycloprop-2-enylidene | 0.0185518   | 0.996979 | 0.0185518   | 0.996979 |
| PhCHCCH2+H                    | 0.00202476  | 0.999004 | 0.00202476  | 0.999004 |
| Benzene+cycloprop-1-enylidene | 0.000812306 | 0.999816 | 0.000812306 | 0.999816 |
| C2H2+PhCH2                    | 5.13360e-05 | 0.999868 | 5.13360e-05 | 0.999868 |
| PhCCH+CH3                     | 3.71181e-05 | 0.999905 | 3.71181e-05 | 0.999905 |
| Ph+MeAc                       | 3.63101e-05 | 0.999941 | 3.63101e-05 | 0.999941 |
| PhCCCH3+H                     | 2.84449e-05 | 0.999970 | 2.84449e-05 | 0.999970 |
| Ph+Allene                     | 1.09467e-05 | 0.999981 | 1.09467e-05 | 0.999981 |
| rad67                         | 1.05822e-05 | 0.999991 | 1.05822e-05 | 0.999991 |
| rad35                         | 4.10935e-06 | 0.999995 | 4.10935e-06 | 0.999995 |
| PhCH2CCH+H                    | 2.95386e-06 | 0.999998 | 2.95386e-06 | 0.999998 |

|                |             |          |             |          |
|----------------|-------------|----------|-------------|----------|
| PAH7+H         | 8.51544e-07 | 0.999999 | 8.51544e-07 | 0.999999 |
| rad37          | 2.86678e-07 | 0.999999 | 2.86678e-07 | 0.999999 |
| rad39          | 2.02113e-07 | 1.000000 | 2.02113e-07 | 1.000000 |
| rad30          | 8.94922e-08 | 1.000000 | 8.94922e-08 | 1.000000 |
| PhcycC3H3_A+H  | 5.02850e-08 | 1.000000 | 5.02850e-08 | 1.000000 |
| PAH9+H         | 2.06877e-08 | 1.000000 | 2.06877e-08 | 1.000000 |
| PAH10+CH3      | 1.44052e-08 | 1.000000 | 1.44052e-08 | 1.000000 |
| rad38          | 1.31833e-08 | 1.000000 | 1.31833e-08 | 1.000000 |
| PhcycC3H3_B+H  | 7.81108e-09 | 1.000000 | 7.81108e-09 | 1.000000 |
| Phenyl+cycC3H4 | 3.55660e-09 | 1.000000 | 0.00000     | 1.000000 |
| PAH3+H         | 2.97650e-09 | 1.000000 | 2.97650e-09 | 1.000000 |
| rad60syn       | 1.43183e-09 | 1.000000 | 1.43183e-09 | 1.000000 |
| rad46          | 1.04912e-09 | 1.000000 | 1.04912e-09 | 1.000000 |
| rad60anti      | 7.84373e-10 | 1.000000 | 7.84373e-10 | 1.000000 |
| rad54          | 4.68681e-10 | 1.000000 | 4.68681e-10 | 1.000000 |
| rad59          | 4.42103e-10 | 1.000000 | 4.42103e-10 | 1.000000 |
| rad43          | 1.96279e-10 | 1.000000 | 1.96279e-10 | 1.000000 |
| rad50          | 6.65686e-11 | 1.000000 | 6.65686e-11 | 1.000000 |
| PAH1+H         | 4.68907e-11 | 1.000000 | 4.68907e-11 | 1.000000 |
| rad62          | 3.77643e-11 | 1.000000 | 3.77643e-11 | 1.000000 |
| rad70          | 3.76449e-11 | 1.000000 | 3.76449e-11 | 1.000000 |
| rad55          | 1.50992e-11 | 1.000000 | 1.50992e-11 | 1.000000 |
| rad34          | 3.22089e-12 | 1.000000 | 3.22089e-12 | 1.000000 |
| rad9           | 3.00470e-12 | 1.000000 | 3.00470e-12 | 1.000000 |
| rad51          | 2.08201e-12 | 1.000000 | 2.08201e-12 | 1.000000 |
| rad58          | 2.05093e-12 | 1.000000 | 2.05093e-12 | 1.000000 |
| rad52          | 1.88541e-12 | 1.000000 | 1.88541e-12 | 1.000000 |
| rad41          | 8.63976e-13 | 1.000000 | 8.63976e-13 | 1.000000 |
| rad19anti      | 6.68082e-13 | 1.000000 | 6.68082e-13 | 1.000000 |
| rad6           | 3.04778e-13 | 1.000000 | 3.04778e-13 | 1.000000 |
| rad42          | 2.74849e-13 | 1.000000 | 2.74849e-13 | 1.000000 |
| rad53          | 1.70506e-13 | 1.000000 | 1.70506e-13 | 1.000000 |
| rad61          | 1.40670e-13 | 1.000000 | 1.40670e-13 | 1.000000 |
| rad64          | 7.73130e-14 | 1.000000 | 7.73130e-14 | 1.000000 |
| rad65          | 6.64236e-14 | 1.000000 | 6.64236e-14 | 1.000000 |
| rad2           | 3.51562e-14 | 1.000000 | 3.51562e-14 | 1.000000 |
| rad23          | 3.51205e-14 | 1.000000 | 3.51205e-14 | 1.000000 |
| rad56          | 2.62116e-14 | 1.000000 | 2.62116e-14 | 1.000000 |
| rad1           | 4.20400e-15 | 1.000000 | 4.20400e-15 | 1.000000 |
| rad45          | 4.07693e-15 | 1.000000 | 4.07693e-15 | 1.000000 |
| rad68syn       | 3.88263e-15 | 1.000000 | 3.88263e-15 | 1.000000 |
| rad68anti      | 2.67416e-15 | 1.000000 | 2.67416e-15 | 1.000000 |
| rad15          | 2.00658e-15 | 1.000000 | 2.00658e-15 | 1.000000 |
| rad10          | 1.67553e-15 | 1.000000 | 1.67553e-15 | 1.000000 |
| rad26          | 8.60644e-16 | 1.000000 | 8.60644e-16 | 1.000000 |
| PAH8+H         | 8.47655e-16 | 1.000000 | 8.47655e-16 | 1.000000 |
| rad40syn       | 5.55808e-16 | 1.000000 | 5.55808e-16 | 1.000000 |
| rad40anti      | 4.06591e-16 | 1.000000 | 4.06591e-16 | 1.000000 |
| rad3           | 3.71082e-16 | 1.000000 | 3.71082e-16 | 1.000000 |
| rad4           | 2.10180e-16 | 1.000000 | 2.10180e-16 | 1.000000 |
| rad36          | 2.06240e-16 | 1.000000 | 2.06240e-16 | 1.000000 |
| rad19syn       | 1.45990e-16 | 1.000000 | 1.45990e-16 | 1.000000 |
| rad28          | 1.27950e-16 | 1.000000 | 1.27950e-16 | 1.000000 |
| rad73          | 6.84594e-17 | 1.000000 | 6.84594e-17 | 1.000000 |
| rad7           | 3.11273e-17 | 1.000000 | 3.11273e-17 | 1.000000 |
| rad71          | 1.36592e-17 | 1.000000 | 1.36592e-17 | 1.000000 |
| rad11          | 8.19784e-18 | 1.000000 | 8.19784e-18 | 1.000000 |
| rad22          | 6.44782e-18 | 1.000000 | 6.44782e-18 | 1.000000 |
| rad31          | 1.77661e-18 | 1.000000 | 1.77661e-18 | 1.000000 |
| rad13          | 2.07310e-19 | 1.000000 | 2.07310e-19 | 1.000000 |
| rad12          | 1.48468e-19 | 1.000000 | 1.48468e-19 | 1.000000 |
| rad27          | 2.23879e-20 | 1.000000 | 2.23879e-20 | 1.000000 |
| rad14          | 1.11031e-20 | 1.000000 | 1.11031e-20 | 1.000000 |
| rad72          | 3.02855e-21 | 1.000000 | 3.02855e-21 | 1.000000 |
| rad33          | 6.40438e-22 | 1.000000 | 6.40438e-22 | 1.000000 |
| rad25          | 1.79105e-22 | 1.000000 | 1.79105e-22 | 1.000000 |
| rad47          | 5.02579e-23 | 1.000000 | 5.02579e-23 | 1.000000 |
| rad24          | 1.14169e-23 | 1.000000 | 1.14169e-23 | 1.000000 |
| rad21          | 4.17186e-24 | 1.000000 | 4.17186e-24 | 1.000000 |
| rad20          | 3.80400e-24 | 1.000000 | 3.80400e-24 | 1.000000 |
| rad18          | 7.73302e-26 | 1.000000 | 7.73302e-26 | 1.000000 |
| rad5           | 1.18964e-26 | 1.000000 | 1.18964e-26 | 1.000000 |
| rad8           | 1.56356e-35 | 1.000000 | 1.56356e-35 | 1.000000 |

0.100000000E-01 Pa, 600.000000 K

| Rate constant      | True (fraction)      | Effective (fraction) |
|--------------------|----------------------|----------------------|
| Total              | 4.35570e-13 (1.00 )  | 4.35570e-13 (1.00 )  |
| Formation of rad19 | 4.18892e-13 (0.962 ) | 4.18892e-13 (0.962 ) |



H-abstraction to cyc2enyl | 1.54751e-14 (0.0355 ) 1.54751e-14 (0.0355 )  
H-abstraction to cyc1enyl | 1.20343e-15 (0.00276 ) 1.20343e-15 (0.00276 )

| species                       | PYtrue      | Cumul    | PYeffective | Cumul    |
|-------------------------------|-------------|----------|-------------|----------|
| Indene+H                      | 0.957276    | 0.957276 | 0.957276    | 0.957276 |
| Benzene+cycloprop-2-enylidene | 0.0355285   | 0.992805 | 0.0355285   | 0.992805 |
| PhCHCCH2+H                    | 0.00402172  | 0.996826 | 0.00402172  | 0.996826 |
| Benzene+cycloprop-1-enylidene | 0.00276289  | 0.999589 | 0.00276289  | 0.999589 |
| C2H2+PhCH2                    | 0.000111945 | 0.999701 | 0.000111945 | 0.999701 |
| Ph+MeAc                       | 8.57421e-05 | 0.999787 | 8.57421e-05 | 0.999787 |
| PhCCH+CH3                     | 6.75064e-05 | 0.999854 | 6.75064e-05 | 0.999854 |
| PhCCCH3+H                     | 5.90383e-05 | 0.999913 | 5.90383e-05 | 0.999913 |
| Ph+Allene                     | 3.56627e-05 | 0.999949 | 3.56627e-05 | 0.999949 |
| rad67                         | 2.54030e-05 | 0.999975 | 2.54030e-05 | 0.999975 |
| PhCH2CCH+H                    | 1.09199e-05 | 0.999985 | 1.09199e-05 | 0.999985 |
| rad35                         | 9.63305e-06 | 0.999995 | 9.63305e-06 | 0.999995 |
| PAH7+H                        | 2.26705e-06 | 0.999997 | 2.26705e-06 | 0.999997 |
| rad37                         | 8.64906e-07 | 0.999998 | 8.64906e-07 | 0.999998 |
| rad39                         | 5.20246e-07 | 0.999999 | 5.20246e-07 | 0.999999 |
| PhcycC3H3_A+H                 | 3.56531e-07 | 0.999999 | 3.56531e-07 | 0.999999 |
| rad30                         | 2.27441e-07 | 0.999999 | 2.27441e-07 | 0.999999 |
| PAH10+CH3                     | 8.50925e-08 | 0.999999 | 8.50925e-08 | 0.999999 |
| PhcycC3H3_B+H                 | 8.43911e-08 | 0.999999 | 8.43911e-08 | 0.999999 |
| PAH9+H                        | 7.13072e-08 | 1.000000 | 7.13072e-08 | 1.000000 |
| rad38                         | 5.21312e-08 | 1.000000 | 5.21312e-08 | 1.000000 |
| Phenyl+cycC3H4                | 3.58023e-08 | 1.000000 | 0.000000    | 1.000000 |
| PAH3+H                        | 1.45692e-08 | 1.000000 | 1.45692e-08 | 1.000000 |
| rad60syn                      | 5.03974e-09 | 1.000000 | 5.03974e-09 | 1.000000 |
| rad46                         | 4.37625e-09 | 1.000000 | 4.37625e-09 | 1.000000 |
| rad60anti                     | 2.82887e-09 | 1.000000 | 2.82887e-09 | 1.000000 |
| rad54                         | 2.63022e-09 | 1.000000 | 2.63022e-09 | 1.000000 |
| rad59                         | 2.03127e-09 | 1.000000 | 2.03127e-09 | 1.000000 |
| rad43                         | 9.14306e-10 | 1.000000 | 9.14306e-10 | 1.000000 |
| rad50                         | 4.49098e-10 | 1.000000 | 4.49098e-10 | 1.000000 |
| PAH1+H                        | 4.05908e-10 | 1.000000 | 4.05908e-10 | 1.000000 |
| rad70                         | 2.63827e-10 | 1.000000 | 2.63827e-10 | 1.000000 |
| rad62                         | 1.58022e-10 | 1.000000 | 1.58022e-10 | 1.000000 |
| rad55                         | 1.01573e-10 | 1.000000 | 1.01573e-10 | 1.000000 |
| rad34                         | 2.81350e-11 | 1.000000 | 2.81350e-11 | 1.000000 |
| rad51                         | 2.21682e-11 | 1.000000 | 2.21682e-11 | 1.000000 |
| rad58                         | 1.79747e-11 | 1.000000 | 1.79747e-11 | 1.000000 |
| rad9                          | 1.64017e-11 | 1.000000 | 1.64017e-11 | 1.000000 |
| rad52                         | 1.61067e-11 | 1.000000 | 1.61067e-11 | 1.000000 |
| rad41                         | 7.27836e-12 | 1.000000 | 7.27836e-12 | 1.000000 |
| rad19anti                     | 4.93458e-12 | 1.000000 | 4.93458e-12 | 1.000000 |
| rad61                         | 2.69102e-12 | 1.000000 | 2.69102e-12 | 1.000000 |
| rad6                          | 2.57210e-12 | 1.000000 | 2.57210e-12 | 1.000000 |
| rad53                         | 2.26530e-12 | 1.000000 | 2.26530e-12 | 1.000000 |
| rad42                         | 1.88132e-12 | 1.000000 | 1.88132e-12 | 1.000000 |
| rad23                         | 1.25211e-12 | 1.000000 | 1.25211e-12 | 1.000000 |
| rad64                         | 9.96196e-13 | 1.000000 | 9.96196e-13 | 1.000000 |
| rad2                          | 7.23283e-13 | 1.000000 | 7.23283e-13 | 1.000000 |
| rad65                         | 7.15469e-13 | 1.000000 | 7.15469e-13 | 1.000000 |
| rad56                         | 5.47671e-13 | 1.000000 | 5.47671e-13 | 1.000000 |
| rad45                         | 1.80622e-13 | 1.000000 | 1.80622e-13 | 1.000000 |
| rad1                          | 1.12367e-13 | 1.000000 | 1.12367e-13 | 1.000000 |
| rad68syn                      | 8.54822e-14 | 1.000000 | 8.54822e-14 | 1.000000 |
| rad68anti                     | 5.81460e-14 | 1.000000 | 5.81460e-14 | 1.000000 |
| PAH8+H                        | 3.69707e-14 | 1.000000 | 3.69707e-14 | 1.000000 |
| rad10                         | 2.14652e-14 | 1.000000 | 2.14652e-14 | 1.000000 |
| rad40syn                      | 1.73361e-14 | 1.000000 | 1.73361e-14 | 1.000000 |
| rad36                         | 1.66446e-14 | 1.000000 | 1.66447e-14 | 1.000000 |
| rad19syn                      | 1.52297e-14 | 1.000000 | 1.52297e-14 | 1.000000 |
| rad40anti                     | 1.26477e-14 | 1.000000 | 1.26477e-14 | 1.000000 |
| rad15                         | 1.07401e-14 | 1.000000 | 1.07401e-14 | 1.000000 |
| rad3                          | 9.10972e-15 | 1.000000 | 9.10972e-15 | 1.000000 |
| rad26                         | 8.14989e-15 | 1.000000 | 8.14989e-15 | 1.000000 |
| rad4                          | 5.99254e-15 | 1.000000 | 5.99254e-15 | 1.000000 |
| rad73                         | 3.46179e-15 | 1.000000 | 3.46179e-15 | 1.000000 |
| rad71                         | 1.15115e-15 | 1.000000 | 1.15115e-15 | 1.000000 |
| rad28                         | 8.92172e-16 | 1.000000 | 8.92172e-16 | 1.000000 |
| rad7                          | 2.90263e-16 | 1.000000 | 2.90263e-16 | 1.000000 |
| rad22                         | 2.04798e-16 | 1.000000 | 2.04798e-16 | 1.000000 |
| rad12                         | 1.41506e-16 | 1.000000 | 1.41506e-16 | 1.000000 |
| rad11                         | 8.09453e-17 | 1.000000 | 8.09453e-17 | 1.000000 |
| rad31                         | 3.24829e-17 | 1.000000 | 3.24829e-17 | 1.000000 |
| rad72                         | 3.71440e-18 | 1.000000 | 3.71440e-18 | 1.000000 |
| rad13                         | 2.32989e-18 | 1.000000 | 2.32989e-18 | 1.000000 |
| rad27                         | 3.04589e-19 | 1.000000 | 3.04589e-19 | 1.000000 |

|       |             |          |             |          |
|-------|-------------|----------|-------------|----------|
| rad14 | 1.37826e-19 | 1.000000 | 1.37826e-19 | 1.000000 |
| rad33 | 9.65248e-21 | 1.000000 | 9.65248e-21 | 1.000000 |
| rad25 | 1.90745e-21 | 1.000000 | 1.90745e-21 | 1.000000 |
| rad47 | 1.30368e-21 | 1.000000 | 1.30368e-21 | 1.000000 |
| rad24 | 6.92418e-22 | 1.000000 | 6.92418e-22 | 1.000000 |
| rad21 | 3.12778e-22 | 1.000000 | 3.12778e-22 | 1.000000 |
| rad20 | 2.12278e-22 | 1.000000 | 2.12278e-22 | 1.000000 |
| rad18 | 3.11646e-24 | 1.000000 | 3.11646e-24 | 1.000000 |
| rad5  | 1.49707e-26 | 1.000000 | 1.49707e-26 | 1.000000 |
| rad8  | 2.39430e-30 | 1.000000 | 2.39430e-30 | 1.000000 |

0.100000000E-01 Pa, 700.000000 K

```

=====
Rate constant          | True (fraction)          Effective (fraction)
-----
Total                  | 6.91694e-13 (1.00      ) 6.91694e-13 (1.00      )
Formation of rad19    | 6.47922e-13 (0.937    ) 6.47922e-13 (0.937    )
H-abstraction to cyc2enyl | 3.91858e-14 (0.0567   ) 3.91858e-14 (0.0567   )
H-abstraction to cyclenyl | 4.58543e-15 (0.00663  ) 4.58542e-15 (0.00663  )

```

| species                       | PYtrue      | Cumul    | PYeffective | Cumul    |
|-------------------------------|-------------|----------|-------------|----------|
| Indene+H                      | 0.928261    | 0.928261 | 0.928261    | 0.928261 |
| Benzene+cycloprop-2-enylidene | 0.0566520   | 0.984913 | 0.0566520   | 0.984913 |
| PhCHCCH2+H                    | 0.00759852  | 0.992512 | 0.00759852  | 0.992512 |
| Benzene+cycloprop-1-enylidene | 0.00662927  | 0.999141 | 0.00662927  | 0.999141 |
| C2H2+PhCH2                    | 0.000223368 | 0.999364 | 0.000223368 | 0.999364 |
| Ph+MeAc                       | 0.000184763 | 0.999549 | 0.000184763 | 0.999549 |
| PhCCH+CH3                     | 0.000114475 | 0.999663 | 0.000114475 | 0.999663 |
| PhCCCH3+H                     | 0.000114174 | 0.999778 | 0.000114175 | 0.999778 |
| Ph+Allene                     | 9.86533e-05 | 0.999876 | 9.86533e-05 | 0.999876 |
| rad67                         | 5.61619e-05 | 0.999932 | 5.61619e-05 | 0.999932 |
| PhCH2CCH+H                    | 3.37386e-05 | 0.999966 | 3.37386e-05 | 0.999966 |
| rad35                         | 2.09202e-05 | 0.999987 | 2.09202e-05 | 0.999987 |
| PAH7+H                        | 5.25053e-06 | 0.999992 | 5.25053e-06 | 0.999992 |
| rad37                         | 2.31771e-06 | 0.999995 | 2.31771e-06 | 0.999995 |
| PhcycC3H3_A+H                 | 1.84669e-06 | 0.999997 | 1.84669e-06 | 0.999997 |
| rad39                         | 1.15814e-06 | 0.999998 | 1.15814e-06 | 0.999998 |
| PhcycC3H3_B+H                 | 5.97905e-07 | 0.999998 | 5.97905e-07 | 0.999998 |
| rad30                         | 5.35179e-07 | 0.999999 | 5.35179e-07 | 0.999999 |
| PAH10+CH3                     | 3.93629e-07 | 0.999999 | 3.93629e-07 | 0.999999 |
| Phenyl+cycC3H4                | 2.47273e-07 | 0.999999 | 0.00000     | 0.999999 |
| PAH9+H                        | 2.20561e-07 | 1.000000 | 2.20561e-07 | 0.999999 |
| rad38                         | 1.79350e-07 | 1.000000 | 1.79350e-07 | 1.000000 |
| PAH3+H                        | 5.98822e-08 | 1.000000 | 5.98822e-08 | 1.000000 |
| rad46                         | 1.59386e-08 | 1.000000 | 1.59386e-08 | 1.000000 |
| rad60syn                      | 1.57199e-08 | 1.000000 | 1.57199e-08 | 1.000000 |
| rad54                         | 1.11960e-08 | 1.000000 | 1.11960e-08 | 1.000000 |
| rad60anti                     | 9.00508e-09 | 1.000000 | 9.00509e-09 | 1.000000 |
| rad59                         | 7.88068e-09 | 1.000000 | 7.88068e-09 | 1.000000 |
| rad43                         | 3.45956e-09 | 1.000000 | 3.45956e-09 | 1.000000 |
| PAH1+H                        | 2.45999e-09 | 1.000000 | 2.45999e-09 | 1.000000 |
| rad50                         | 2.44590e-09 | 1.000000 | 2.44590e-09 | 1.000000 |
| rad70                         | 1.34940e-09 | 1.000000 | 1.34940e-09 | 1.000000 |
| rad62                         | 5.31173e-10 | 1.000000 | 5.31173e-10 | 1.000000 |
| rad55                         | 4.95205e-10 | 1.000000 | 4.95205e-10 | 1.000000 |
| rad9                          | 2.62749e-10 | 1.000000 | 2.62750e-10 | 1.000000 |
| rad51                         | 1.72724e-10 | 1.000000 | 1.72724e-10 | 1.000000 |
| rad34                         | 1.70514e-10 | 1.000000 | 1.70514e-10 | 1.000000 |
| rad58                         | 1.15485e-10 | 1.000000 | 1.15485e-10 | 1.000000 |
| rad52                         | 1.05464e-10 | 1.000000 | 1.05464e-10 | 1.000000 |
| rad41                         | 4.33857e-11 | 1.000000 | 4.33857e-11 | 1.000000 |
| rad61                         | 2.93854e-11 | 1.000000 | 2.93854e-11 | 1.000000 |
| rad53                         | 1.83954e-11 | 1.000000 | 1.83954e-11 | 1.000000 |
| rad42                         | 9.22828e-12 | 1.000000 | 9.22829e-12 | 1.000000 |
| rad64                         | 7.69008e-12 | 1.000000 | 7.69009e-12 | 1.000000 |
| rad19anti                     | 6.95738e-12 | 1.000000 | 6.95738e-12 | 1.000000 |
| rad56                         | 6.14058e-12 | 1.000000 | 6.14058e-12 | 1.000000 |
| rad6                          | 6.13718e-12 | 1.000000 | 6.13717e-12 | 1.000000 |
| rad65                         | 5.56392e-12 | 1.000000 | 5.56393e-12 | 1.000000 |
| rad23                         | 5.27072e-12 | 1.000000 | 5.27072e-12 | 1.000000 |
| rad2                          | 2.49244e-12 | 1.000000 | 2.49244e-12 | 1.000000 |
| rad68syn                      | 1.01774e-12 | 1.000000 | 1.01774e-12 | 1.000000 |
| rad45                         | 7.48030e-13 | 1.000000 | 7.48030e-13 | 1.000000 |
| PAH8+H                        | 7.28057e-13 | 1.000000 | 7.28057e-13 | 1.000000 |
| rad68anti                     | 6.85979e-13 | 1.000000 | 6.85979e-13 | 1.000000 |
| rad1                          | 5.46448e-13 | 1.000000 | 5.46448e-13 | 1.000000 |
| rad40syn                      | 2.68017e-13 | 1.000000 | 2.68017e-13 | 1.000000 |
| rad40anti                     | 1.96479e-13 | 1.000000 | 1.96479e-13 | 1.000000 |
| rad15                         | 1.20866e-13 | 1.000000 | 1.20866e-13 | 1.000000 |

|          |             |         |             |          |
|----------|-------------|---------|-------------|----------|
| rad12    | 1.18063e-13 | 1.00000 | 1.18063e-13 | 1.000000 |
| rad36    | 9.38555e-14 | 1.00000 | 9.38555e-14 | 1.000000 |
| rad19syn | 8.87889e-14 | 1.00000 | 8.87889e-14 | 1.000000 |
| rad73    | 8.20021e-14 | 1.00000 | 8.20021e-14 | 1.000000 |
| rad10    | 5.88478e-14 | 1.00000 | 5.88478e-14 | 1.000000 |
| rad71    | 3.64894e-14 | 1.00000 | 3.64894e-14 | 1.000000 |
| rad3     | 3.05884e-14 | 1.00000 | 3.05884e-14 | 1.000000 |
| rad4     | 2.36277e-14 | 1.00000 | 2.36277e-14 | 1.000000 |
| rad26    | 2.00355e-14 | 1.00000 | 2.00355e-14 | 1.000000 |
| rad28    | 2.09473e-15 | 1.00000 | 2.09473e-15 | 1.000000 |
| rad22    | 8.97348e-16 | 1.00000 | 8.97347e-16 | 1.000000 |
| rad7     | 8.07353e-16 | 1.00000 | 8.07353e-16 | 1.000000 |
| rad11    | 2.46451e-16 | 1.00000 | 2.46451e-16 | 1.000000 |
| rad72    | 1.27130e-16 | 1.00000 | 1.27130e-16 | 1.000000 |
| rad31    | 9.71087e-17 | 1.00000 | 9.71087e-17 | 1.000000 |
| rad13    | 8.98096e-18 | 1.00000 | 8.98097e-18 | 1.000000 |
| rad27    | 9.60202e-19 | 1.00000 | 9.60202e-19 | 1.000000 |
| rad14    | 4.06915e-19 | 1.00000 | 4.06915e-19 | 1.000000 |
| rad24    | 2.04524e-19 | 1.00000 | 2.04524e-19 | 1.000000 |
| rad33    | 6.59028e-20 | 1.00000 | 6.59028e-20 | 1.000000 |
| rad21    | 3.76867e-20 | 1.00000 | 3.76867e-20 | 1.000000 |
| rad47    | 1.29173e-20 | 1.00000 | 1.29173e-20 | 1.000000 |
| rad20    | 9.38564e-21 | 1.00000 | 9.38564e-21 | 1.000000 |
| rad25    | 7.06554e-21 | 1.00000 | 7.06554e-21 | 1.000000 |
| rad18    | 3.94468e-23 | 1.00000 | 3.94469e-23 | 1.000000 |
| rad8     | 5.34142e-25 | 1.00000 | 5.34142e-25 | 1.000000 |
| rad5     | 3.00127e-26 | 1.00000 | 3.00127e-26 | 1.000000 |

0.100000000E-01 Pa, 800.000000 K

| Rate constant             | True (fraction)       | Effective (fraction)  |
|---------------------------|-----------------------|-----------------------|
| Total                     | 1.03759e-12 (1.00 )   | 1.03758e-12 (1.00 )   |
| Formation of rad19        | 9.41065e-13 (0.907 )  | 9.41063e-13 (0.907 )  |
| H-abstraction to cyc2enyl | 8.32953e-14 (0.0803 ) | 8.32953e-14 (0.0803 ) |
| H-abstraction to cyclenyl | 1.32261e-14 (0.0127 ) | 1.32261e-14 (0.0127 ) |

| species                       | PYtrue      | Cumul    | PYeffective | Cumul    |
|-------------------------------|-------------|----------|-------------|----------|
| Indene+H                      | 0.891851    | 0.891851 | 0.891852    | 0.891852 |
| Benzene+cycloprop-2-enylidene | 0.0802780   | 0.972129 | 0.0802781   | 0.972130 |
| PhCHCCH2+H                    | 0.0134623   | 0.985592 | 0.0134623   | 0.985592 |
| Benzene+cycloprop-1-enylidene | 0.0127470   | 0.998339 | 0.0127470   | 0.998339 |
| C2H2+PhCH2                    | 0.000407099 | 0.998746 | 0.000407100 | 0.998747 |
| Ph+MeAc                       | 0.000361139 | 0.999107 | 0.000361140 | 0.999108 |
| Ph+Allene                     | 0.000232339 | 0.999339 | 0.000232340 | 0.999340 |
| PhCCCH3+H                     | 0.000203972 | 0.999543 | 0.000203972 | 0.999544 |
| PhCCH+CH3                     | 0.000180553 | 0.999724 | 0.000180553 | 0.999725 |
| rad67                         | 0.000113174 | 0.999837 | 0.000113175 | 0.999838 |
| PhCH2CCH+H                    | 8.77939e-05 | 0.999925 | 8.77940e-05 | 0.999925 |
| rad35                         | 4.16131e-05 | 0.999966 | 4.16132e-05 | 0.999967 |
| PAH7+H                        | 1.05801e-05 | 0.999977 | 1.05801e-05 | 0.999978 |
| PhcycC3H3_A+H                 | 7.41213e-06 | 0.999984 | 7.41213e-06 | 0.999985 |
| rad37                         | 5.46667e-06 | 0.999990 | 5.46667e-06 | 0.999991 |
| PhcycC3H3_B+H                 | 3.06128e-06 | 0.999993 | 3.06128e-06 | 0.999994 |
| rad39                         | 2.23428e-06 | 0.999995 | 2.23429e-06 | 0.999996 |
| PAH10+CH3                     | 1.45375e-06 | 0.999996 | 1.45375e-06 | 0.999997 |
| Phenyl+cycC3H4                | 1.26413e-06 | 0.999998 | 0.00000     | 0.999997 |
| rad30                         | 1.14934e-06 | 0.999999 | 1.14934e-06 | 0.999998 |
| PAH9+H                        | 6.06294e-07 | 0.999999 | 6.06295e-07 | 0.999999 |
| rad38                         | 5.31264e-07 | 1.000000 | 5.31265e-07 | 1.000000 |
| PAH3+H                        | 2.06539e-07 | 1.00000  | 2.06539e-07 | 1.000000 |
| rad46                         | 5.03854e-08 | 1.00000  | 5.03855e-08 | 1.000000 |
| rad60syn                      | 4.30118e-08 | 1.00000  | 4.30119e-08 | 1.000000 |
| rad54                         | 3.72621e-08 | 1.00000  | 3.72621e-08 | 1.000000 |
| rad59                         | 2.58009e-08 | 1.00000  | 2.58009e-08 | 1.000000 |
| rad60anti                     | 2.50615e-08 | 1.00000  | 2.50615e-08 | 1.000000 |
| PAH1+H                        | 1.11106e-08 | 1.00000  | 1.11106e-08 | 1.00000  |
| rad50                         | 1.08542e-08 | 1.00000  | 1.08542e-08 | 1.00000  |
| rad43                         | 1.08257e-08 | 1.00000  | 1.08257e-08 | 1.00000  |
| rad9                          | 7.58907e-09 | 1.00000  | 7.58908e-09 | 1.00000  |
| rad70                         | 5.27776e-09 | 1.00000  | 5.27777e-09 | 1.00000  |
| rad55                         | 1.83178e-09 | 1.00000  | 1.83178e-09 | 1.00000  |
| rad62                         | 1.46957e-09 | 1.00000  | 1.46958e-09 | 1.00000  |
| rad51                         | 1.02172e-09 | 1.00000  | 1.02172e-09 | 1.00000  |
| rad34                         | 7.64080e-10 | 1.00000  | 7.64081e-10 | 1.00000  |
| rad58                         | 5.66096e-10 | 1.00000  | 5.66097e-10 | 1.00000  |
| rad52                         | 5.41866e-10 | 1.00000  | 5.41867e-10 | 1.00000  |
| rad61                         | 2.09094e-10 | 1.00000  | 2.09095e-10 | 1.00000  |
| rad41                         | 1.94602e-10 | 1.00000  | 1.94602e-10 | 1.00000  |

|           |             |         |             |         |
|-----------|-------------|---------|-------------|---------|
| rad53     | 1.01506e-10 | 1.00000 | 1.01506e-10 | 1.00000 |
| rad56     | 4.31970e-11 | 1.00000 | 4.31970e-11 | 1.00000 |
| rad64     | 4.01381e-11 | 1.00000 | 4.01382e-11 | 1.00000 |
| rad42     | 3.44821e-11 | 1.00000 | 3.44822e-11 | 1.00000 |
| rad65     | 3.26116e-11 | 1.00000 | 3.26116e-11 | 1.00000 |
| rad23     | 8.41082e-12 | 1.00000 | 8.41083e-12 | 1.00000 |
| PAH8+H    | 8.11872e-12 | 1.00000 | 8.11874e-12 | 1.00000 |
| rad68syn  | 7.66949e-12 | 1.00000 | 7.66951e-12 | 1.00000 |
| rad6      | 6.66429e-12 | 1.00000 | 6.66430e-12 | 1.00000 |
| rad12     | 6.62665e-12 | 1.00000 | 6.62666e-12 | 1.00000 |
| rad19anti | 6.02838e-12 | 1.00000 | 6.02839e-12 | 1.00000 |
| rad68anti | 5.13296e-12 | 1.00000 | 5.13297e-12 | 1.00000 |
| rad2      | 3.17114e-12 | 1.00000 | 3.17115e-12 | 1.00000 |
| rad40syn  | 2.48703e-12 | 1.00000 | 2.48704e-12 | 1.00000 |
| rad15     | 2.21643e-12 | 1.00000 | 2.21643e-12 | 1.00000 |
| rad40anti | 1.83946e-12 | 1.00000 | 1.83946e-12 | 1.00000 |
| rad45     | 1.48096e-12 | 1.00000 | 1.48096e-12 | 1.00000 |
| rad73     | 1.12045e-12 | 1.00000 | 1.12046e-12 | 1.00000 |
| rad1      | 8.46541e-13 | 1.00000 | 8.46542e-13 | 1.00000 |
| rad71     | 6.17060e-13 | 1.00000 | 6.17060e-13 | 1.00000 |
| rad36     | 1.73583e-13 | 1.00000 | 1.73584e-13 | 1.00000 |
| rad19syn  | 1.44428e-13 | 1.00000 | 1.44428e-13 | 1.00000 |
| rad10     | 7.84092e-14 | 1.00000 | 7.84093e-14 | 1.00000 |
| rad3      | 3.60880e-14 | 1.00000 | 3.60880e-14 | 1.00000 |
| rad4      | 2.90438e-14 | 1.00000 | 2.90438e-14 | 1.00000 |
| rad26     | 2.28722e-14 | 1.00000 | 2.28723e-14 | 1.00000 |
| rad28     | 2.37886e-15 | 1.00000 | 2.37886e-15 | 1.00000 |
| rad72     | 2.31071e-15 | 1.00000 | 2.31071e-15 | 1.00000 |
| rad22     | 1.52841e-15 | 1.00000 | 1.52841e-15 | 1.00000 |
| rad7      | 1.10655e-15 | 1.00000 | 1.10655e-15 | 1.00000 |
| rad11     | 3.86468e-16 | 1.00000 | 3.86469e-16 | 1.00000 |
| rad31     | 1.51028e-16 | 1.00000 | 1.51029e-16 | 1.00000 |
| rad24     | 4.04561e-17 | 1.00000 | 4.04561e-17 | 1.00000 |
| rad13     | 2.10649e-17 | 1.00000 | 2.10650e-17 | 1.00000 |
| rad21     | 1.35243e-17 | 1.00000 | 1.35244e-17 | 1.00000 |
| rad33     | 2.54875e-18 | 1.00000 | 2.54875e-18 | 1.00000 |
| rad20     | 2.22238e-18 | 1.00000 | 2.22239e-18 | 1.00000 |
| rad27     | 1.48141e-18 | 1.00000 | 1.48141e-18 | 1.00000 |
| rad14     | 5.78034e-19 | 1.00000 | 5.78035e-19 | 1.00000 |
| rad47     | 8.54228e-20 | 1.00000 | 8.54230e-20 | 1.00000 |
| rad25     | 4.85382e-20 | 1.00000 | 4.85383e-20 | 1.00000 |
| rad8      | 2.39871e-20 | 1.00000 | 2.39871e-20 | 1.00000 |
| rad18     | 4.98687e-22 | 1.00000 | 4.98687e-22 | 1.00000 |
| rad5      | 8.28838e-26 | 1.00000 | 8.28840e-26 | 1.00000 |

0.100000000E-01 Pa, 900.000000 K

| Rate constant             | True (fraction)      | Effective (fraction) |
|---------------------------|----------------------|----------------------|
| Total                     | 1.49199e-12 (1.00)   | 1.49199e-12 (1.00)   |
| Formation of rad19        | 1.30395e-12 (0.874)  | 1.30394e-12 (0.874)  |
| H-abstraction to cyc2enyl | 1.56554e-13 (0.105)  | 1.56554e-13 (0.105)  |
| H-abstraction to cyc1enyl | 3.14892e-14 (0.0211) | 3.14890e-14 (0.0211) |

| species                       | PYtrue      | Cumul    | PYeffective | Cumul    |
|-------------------------------|-------------|----------|-------------|----------|
| Indene+H                      | 0.848699    | 0.848699 | 0.848703    | 0.848703 |
| Benzene+cycloprop-2-enylidene | 0.104929    | 0.953628 | 0.104930    | 0.953633 |
| PhCHCCH2+H                    | 0.0222942   | 0.975922 | 0.0222943   | 0.975927 |
| Benzene+cycloprop-1-enylidene | 0.0211054   | 0.997028 | 0.0211054   | 0.997032 |
| C2H2+PhCH2                    | 0.000683872 | 0.997712 | 0.000683876 | 0.997716 |
| Ph+MeAc                       | 0.000643408 | 0.998355 | 0.000643411 | 0.998360 |
| Ph+Allene                     | 0.000474189 | 0.998829 | 0.000474191 | 0.998834 |
| PhCCCH3+H                     | 0.000337157 | 0.999166 | 0.000337159 | 0.999171 |
| PhCCH+CH3                     | 0.000266834 | 0.999433 | 0.000266835 | 0.999438 |
| rad67                         | 0.000208254 | 0.999642 | 0.000208254 | 0.999646 |
| PhCH2CCH+H                    | 0.000196565 | 0.999838 | 0.000196566 | 0.999843 |
| rad35                         | 7.58735e-05 | 0.999914 | 7.58739e-05 | 0.999919 |
| PhcycC3H3_A+H                 | 2.42105e-05 | 0.999938 | 2.42107e-05 | 0.999943 |
| PAH7+H                        | 1.88376e-05 | 0.999957 | 1.88377e-05 | 0.999962 |
| PhcycC3H3_B+H                 | 1.21562e-05 | 0.999969 | 1.21563e-05 | 0.999974 |
| rad37                         | 1.14051e-05 | 0.999981 | 1.14052e-05 | 0.999985 |
| Phenyl+cycC3H4                | 5.07995e-06 | 0.999986 | 0.00000     | 0.999985 |
| PAH10+CH3                     | 4.40481e-06 | 0.999990 | 4.40483e-06 | 0.999990 |
| rad39                         | 3.79887e-06 | 0.999994 | 3.79890e-06 | 0.999993 |
| rad30                         | 2.25166e-06 | 0.999996 | 2.25167e-06 | 0.999996 |
| PAH9+H                        | 1.48869e-06 | 0.999998 | 1.48870e-06 | 0.999997 |
| rad38                         | 1.36509e-06 | 0.999999 | 1.36510e-06 | 0.999998 |
| PAH3+H                        | 6.06220e-07 | 1.000000 | 6.06223e-07 | 0.999999 |
| rad46                         | 1.39491e-07 | 1.000000 | 1.39492e-07 | 0.999999 |

|           |             |          |             |          |
|-----------|-------------|----------|-------------|----------|
| rad60syn  | 1.03786e-07 | 1.000000 | 1.03787e-07 | 0.999999 |
| rad54     | 1.00669e-07 | 1.000000 | 1.00669e-07 | 0.999999 |
| rad59     | 7.22603e-08 | 1.000000 | 7.22607e-08 | 0.999999 |
| rad60anti | 6.13440e-08 | 1.000000 | 6.13443e-08 | 1.000000 |
| rad50     | 4.00864e-08 | 1.000000 | 4.00867e-08 | 1.000000 |
| PAH1+H    | 3.94766e-08 | 1.000000 | 3.94768e-08 | 1.000000 |
| rad9      | 3.89504e-08 | 1.000000 | 3.89505e-08 | 1.000000 |
| rad43     | 2.87041e-08 | 1.000000 | 2.87042e-08 | 1.000000 |
| rad70     | 1.65416e-08 | 1.000000 | 1.65417e-08 | 1.000000 |
| rad55     | 5.38716e-09 | 1.000000 | 5.38719e-09 | 1.000000 |
| rad51     | 4.77352e-09 | 1.000000 | 4.77354e-09 | 1.000000 |
| rad62     | 3.44643e-09 | 1.000000 | 3.44644e-09 | 1.000000 |
| rad34     | 2.67914e-09 | 1.000000 | 2.67916e-09 | 1.000000 |
| rad52     | 2.25302e-09 | 1.000000 | 2.25304e-09 | 1.000000 |
| rad58     | 2.20490e-09 | 1.000000 | 2.20492e-09 | 1.000000 |
| rad61     | 1.06284e-09 | 1.000000 | 1.06285e-09 | 1.000000 |
| rad41     | 6.91255e-10 | 1.000000 | 6.91258e-10 | 1.000000 |
| rad53     | 4.12706e-10 | 1.000000 | 4.12709e-10 | 1.000000 |
| rad56     | 2.12410e-10 | 1.000000 | 2.12412e-10 | 1.000000 |
| rad64     | 1.54874e-10 | 1.000000 | 1.54875e-10 | 1.000000 |
| rad65     | 1.50381e-10 | 1.000000 | 1.50381e-10 | 1.000000 |
| rad42     | 1.03381e-10 | 1.000000 | 1.03382e-10 | 1.000000 |
| PAH8+H    | 5.91857e-11 | 1.000000 | 5.91860e-11 | 1.000000 |
| rad68syn  | 4.07276e-11 | 1.000000 | 4.07278e-11 | 1.000000 |
| rad12     | 4.04628e-11 | 1.000000 | 4.04631e-11 | 1.000000 |
| rad68anti | 2.71039e-11 | 1.000000 | 2.71041e-11 | 1.000000 |
| rad40syn  | 1.56841e-11 | 1.000000 | 1.56842e-11 | 1.000000 |
| rad40anti | 1.17245e-11 | 1.000000 | 1.17245e-11 | 1.000000 |
| rad73     | 1.02166e-11 | 1.000000 | 1.02166e-11 | 1.000000 |
| rad15     | 9.37127e-12 | 1.000000 | 9.37135e-12 | 1.000000 |
| rad23     | 9.03383e-12 | 1.000000 | 9.03382e-12 | 1.000000 |
| rad71     | 6.81937e-12 | 1.000000 | 6.81941e-12 | 1.000000 |
| rad19anti | 4.57502e-12 | 1.000000 | 4.57505e-12 | 1.000000 |
| rad6      | 4.54131e-12 | 1.000000 | 4.54134e-12 | 1.000000 |
| rad2      | 2.75768e-12 | 1.000000 | 2.75770e-12 | 1.000000 |
| rad45     | 1.95902e-12 | 1.000000 | 1.95904e-12 | 1.000000 |
| rad1      | 7.81484e-13 | 1.000000 | 7.81489e-13 | 1.000000 |
| rad36     | 2.14336e-13 | 1.000000 | 2.14337e-13 | 1.000000 |
| rad19syn  | 1.51735e-13 | 1.000000 | 1.51736e-13 | 1.000000 |
| rad10     | 7.60267e-14 | 1.000000 | 7.60271e-14 | 1.000000 |
| rad72     | 4.04627e-14 | 1.000000 | 4.04630e-14 | 1.000000 |
| rad3      | 2.89148e-14 | 1.000000 | 2.89149e-14 | 1.000000 |
| rad4      | 2.36782e-14 | 1.000000 | 2.36784e-14 | 1.000000 |
| rad26     | 1.68050e-14 | 1.000000 | 1.68050e-14 | 1.000000 |
| rad22     | 1.77839e-15 | 1.000000 | 1.77840e-15 | 1.000000 |
| rad28     | 1.72608e-15 | 1.000000 | 1.72609e-15 | 1.000000 |
| rad21     | 1.24379e-15 | 1.000000 | 1.24380e-15 | 1.000000 |
| rad7      | 1.06001e-15 | 1.000000 | 1.06001e-15 | 1.000000 |
| rad24     | 8.13244e-16 | 1.000000 | 8.13248e-16 | 1.000000 |
| rad11     | 4.40325e-16 | 1.000000 | 4.40328e-16 | 1.000000 |
| rad20     | 2.40230e-16 | 1.000000 | 2.40232e-16 | 1.000000 |
| rad31     | 1.88478e-16 | 1.000000 | 1.88478e-16 | 1.000000 |
| rad33     | 1.64681e-16 | 1.000000 | 1.64682e-16 | 1.000000 |
| rad13     | 7.19187e-17 | 1.000000 | 7.19191e-17 | 1.000000 |
| rad8      | 5.47294e-17 | 1.000000 | 5.47297e-17 | 1.000000 |
| rad27     | 3.55988e-18 | 1.000000 | 3.55990e-18 | 1.000000 |
| rad25     | 2.47551e-18 | 1.000000 | 2.47552e-18 | 1.000000 |
| rad14     | 6.79663e-19 | 1.000000 | 6.79666e-19 | 1.000000 |
| rad47     | 4.17783e-19 | 1.000000 | 4.17785e-19 | 1.000000 |
| rad18     | 2.11976e-20 | 1.000000 | 2.11977e-20 | 1.000000 |
| rad5      | 3.07367e-25 | 1.000000 | 3.07369e-25 | 1.000000 |

0.100000000E-01 Pa, 1000.00000 K

=====

| Rate constant             | True (fraction)       | Effective (fraction)  |
|---------------------------|-----------------------|-----------------------|
| Total                     | 2.07591e-12 (1.00 )   | 2.07587e-12 (1.00 )   |
| Formation of rad19        | 1.74189e-12 (0.839 )  | 1.74186e-12 (0.839 )  |
| H-abstraction to cyc2enyl | 2.68753e-13 (0.129 )  | 2.68753e-13 (0.129 )  |
| H-abstraction to cyclenyl | 6.52627e-14 (0.0314 ) | 6.52614e-14 (0.0314 ) |

| species                       | PYtrue      | Cumul    | PYeffective | Cumul    |
|-------------------------------|-------------|----------|-------------|----------|
| Indene+H                      | 0.799582    | 0.799582 | 0.799596    | 0.799596 |
| Benzene+cycloprop-2-enylidene | 0.129463    | 0.929045 | 0.129465    | 0.929061 |
| PhCHCCH2+H                    | 0.0345729   | 0.963618 | 0.0345735   | 0.963635 |
| Benzene+cycloprop-1-enylidene | 0.0314382   | 0.995056 | 0.0314381   | 0.995073 |
| C2H2+PhCH2                    | 0.00107013  | 0.996126 | 0.00107015  | 0.996143 |
| Ph+MeAc                       | 0.00105356  | 0.997180 | 0.00105358  | 0.997197 |
| Ph+Allene                     | 0.000856132 | 0.998036 | 0.000856147 | 0.998053 |

|                |             |          |             |          |
|----------------|-------------|----------|-------------|----------|
| PhCCCH3+H      | 0.000518390 | 0.998555 | 0.000518399 | 0.998571 |
| PhCH2CCH+H     | 0.000387335 | 0.998942 | 0.000387341 | 0.998959 |
| PhCCH+CH3      | 0.000373414 | 0.999315 | 0.000373421 | 0.999332 |
| rad67          | 0.000352156 | 0.999667 | 0.000352163 | 0.999684 |
| rad35          | 0.000127507 | 0.999795 | 0.000127509 | 0.999812 |
| PhcycC3H3_A+H  | 6.68792e-05 | 0.999862 | 6.68804e-05 | 0.999879 |
| PhcycC3H3_B+H  | 3.94292e-05 | 0.999901 | 3.94298e-05 | 0.999918 |
| PAH7+H         | 3.02071e-05 | 0.999932 | 3.02076e-05 | 0.999948 |
| rad37          | 2.12566e-05 | 0.999953 | 2.12570e-05 | 0.999970 |
| Phenyl+cycC3H4 | 1.68078e-05 | 0.999970 | 0.000000    | 0.999970 |
| PAH10+CH3      | 1.12450e-05 | 0.999981 | 1.12452e-05 | 0.999981 |
| rad39          | 5.81026e-06 | 0.999987 | 5.81037e-06 | 0.999987 |
| rad30          | 4.04410e-06 | 0.999991 | 4.04418e-06 | 0.999991 |
| PAH9+H         | 3.29373e-06 | 0.999994 | 3.29379e-06 | 0.999994 |
| rad38          | 3.08270e-06 | 0.999997 | 3.08276e-06 | 0.999997 |
| PAH3+H         | 1.54079e-06 | 0.999999 | 1.54081e-06 | 0.999999 |
| rad46          | 3.42258e-07 | 0.999999 | 3.42264e-07 | 0.999999 |
| rad54          | 2.28524e-07 | 0.999999 | 2.28528e-07 | 0.999999 |
| rad60syn       | 2.23174e-07 | 0.999999 | 2.23179e-07 | 0.999999 |
| rad59          | 1.76077e-07 | 1.000000 | 1.76080e-07 | 1.000000 |
| rad60anti      | 1.33522e-07 | 1.000000 | 1.33524e-07 | 1.000000 |
| rad50          | 1.25846e-07 | 1.000000 | 1.25849e-07 | 1.000000 |
| PAH1+H         | 1.15152e-07 | 1.000000 | 1.15153e-07 | 1.000000 |
| rad43          | 6.59895e-08 | 1.000000 | 6.59906e-08 | 1.000000 |
| rad9           | 5.51021e-08 | 1.000000 | 5.51031e-08 | 1.000000 |
| rad70          | 4.32155e-08 | 1.000000 | 4.32162e-08 | 1.000000 |
| rad51          | 1.82111e-08 | 1.000000 | 1.82115e-08 | 1.000000 |
| rad55          | 1.31140e-08 | 1.000000 | 1.31142e-08 | 1.000000 |
| rad52          | 7.79464e-09 | 1.000000 | 7.79478e-09 | 1.000000 |
| rad34          | 7.69275e-09 | 1.000000 | 7.69289e-09 | 1.000000 |
| rad58          | 7.06750e-09 | 1.000000 | 7.06763e-09 | 1.000000 |
| rad62          | 7.03952e-09 | 1.000000 | 7.03964e-09 | 1.000000 |
| rad61          | 4.12351e-09 | 1.000000 | 4.12358e-09 | 1.000000 |
| rad41          | 2.02463e-09 | 1.000000 | 2.02466e-09 | 1.000000 |
| rad53          | 1.31442e-09 | 1.000000 | 1.31444e-09 | 1.000000 |
| rad56          | 7.88535e-10 | 1.000000 | 7.88549e-10 | 1.000000 |
| rad65          | 5.65276e-10 | 1.000000 | 5.65287e-10 | 1.000000 |
| rad64          | 4.71892e-10 | 1.000000 | 4.71900e-10 | 1.000000 |
| PAH8+H         | 3.09983e-10 | 1.000000 | 3.09989e-10 | 1.000000 |
| rad42          | 2.59232e-10 | 1.000000 | 2.59236e-10 | 1.000000 |
| rad68syn       | 1.64280e-10 | 1.000000 | 1.64283e-10 | 1.000000 |
| rad68anti      | 1.08821e-10 | 1.000000 | 1.08823e-10 | 1.000000 |
| rad40syn       | 7.30968e-11 | 1.000000 | 7.30981e-11 | 1.000000 |
| rad12          | 7.27811e-11 | 1.000000 | 7.27823e-11 | 1.000000 |
| rad73          | 6.67694e-11 | 1.000000 | 6.67705e-11 | 1.000000 |
| rad40anti      | 5.52465e-11 | 1.000000 | 5.52475e-11 | 1.000000 |
| rad71          | 5.21260e-11 | 1.000000 | 5.21269e-11 | 1.000000 |
| rad15          | 1.43462e-11 | 1.000000 | 1.43465e-11 | 1.000000 |
| rad23          | 8.83311e-12 | 1.000000 | 8.83325e-12 | 1.000000 |
| rad19anti      | 3.42049e-12 | 1.000000 | 3.42054e-12 | 1.000000 |
| rad6           | 2.83022e-12 | 1.000000 | 2.83027e-12 | 1.000000 |
| rad45          | 2.20074e-12 | 1.000000 | 2.20078e-12 | 1.000000 |
| rad2           | 2.19214e-12 | 1.000000 | 2.19217e-12 | 1.000000 |
| rad1           | 6.33095e-13 | 1.000000 | 6.33107e-13 | 1.000000 |
| rad72          | 4.55313e-13 | 1.000000 | 4.55321e-13 | 1.000000 |
| rad36          | 2.30860e-13 | 1.000000 | 2.30865e-13 | 1.000000 |
| rad19syn       | 1.42443e-13 | 1.000000 | 1.42446e-13 | 1.000000 |
| rad10          | 7.27952e-14 | 1.000000 | 7.27965e-14 | 1.000000 |
| rad3           | 2.15369e-14 | 1.000000 | 2.15373e-14 | 1.000000 |
| rad21          | 2.11623e-14 | 1.000000 | 2.11627e-14 | 1.000000 |
| rad4           | 1.76731e-14 | 1.000000 | 1.76734e-14 | 1.000000 |
| rad26          | 1.17837e-14 | 1.000000 | 1.17839e-14 | 1.000000 |
| rad8           | 6.27722e-15 | 1.000000 | 6.27733e-15 | 1.000000 |
| rad20          | 4.94003e-15 | 1.000000 | 4.94011e-15 | 1.000000 |
| rad24          | 3.61523e-15 | 1.000000 | 3.61530e-15 | 1.000000 |
| rad33          | 2.31491e-15 | 1.000000 | 2.31496e-15 | 1.000000 |
| rad13          | 2.25739e-15 | 1.000000 | 2.25743e-15 | 1.000000 |
| rad22          | 1.95228e-15 | 1.000000 | 1.95232e-15 | 1.000000 |
| rad28          | 1.17520e-15 | 1.000000 | 1.17521e-15 | 1.000000 |
| rad7           | 1.04832e-15 | 1.000000 | 1.04833e-15 | 1.000000 |
| rad11          | 6.23447e-16 | 1.000000 | 6.23458e-16 | 1.000000 |
| rad31          | 2.18571e-16 | 1.000000 | 2.18575e-16 | 1.000000 |
| rad25          | 7.69438e-17 | 1.000000 | 7.69451e-17 | 1.000000 |
| rad27          | 5.73474e-17 | 1.000000 | 5.73484e-17 | 1.000000 |
| rad14          | 4.42401e-18 | 1.000000 | 4.42409e-18 | 1.000000 |
| rad47          | 1.62980e-18 | 1.000000 | 1.62983e-18 | 1.000000 |
| rad18          | 8.23752e-19 | 1.000000 | 8.23765e-19 | 1.000000 |
| rad5           | 2.41003e-24 | 1.000000 | 2.41007e-24 | 1.000000 |

0.100000000E-01 Pa, 1100.00000 K

=====

| Rate constant             | True (fraction)       | Effective (fraction)  |
|---------------------------|-----------------------|-----------------------|
| Total                     | 2.81236e-12 (1.00 )   | 2.81222e-12 (1.00 )   |
| Formation of rad19        | 2.25993e-12 (0.804 )  | 2.25980e-12 (0.804 )  |
| H-abstraction to cyc2enyl | 4.30538e-13 (0.153 )  | 4.30538e-13 (0.153 )  |
| H-abstraction to cyclenyl | 1.21896e-13 (0.0433 ) | 1.21889e-13 (0.0433 ) |

| species                       | PYtrue      | Cumul    | PYeffective | Cumul    |
|-------------------------------|-------------|----------|-------------|----------|
| Indene+H                      | 0.745454    | 0.745454 | 0.745492    | 0.745492 |
| Benzene+cycloprop-2-enylidene | 0.153088    | 0.898542 | 0.153095    | 0.898587 |
| PhCHCCH2+H                    | 0.0504086   | 0.948951 | 0.0504111   | 0.948998 |
| Benzene+cycloprop-1-enylidene | 0.0433429   | 0.992294 | 0.0433425   | 0.992341 |
| Ph+MeAc                       | 0.00159990  | 0.993894 | 0.00159998  | 0.993941 |
| C2H2+PhCH2                    | 0.00157394  | 0.995468 | 0.00157402  | 0.995515 |
| Ph+Allene                     | 0.00139378  | 0.996861 | 0.00139384  | 0.996909 |
| PhCCCH3+H                     | 0.000746148 | 0.997607 | 0.000746185 | 0.997655 |
| PhCH2CCH+H                    | 0.000685304 | 0.998293 | 0.000685339 | 0.998340 |
| rad67                         | 0.000551511 | 0.998844 | 0.000551539 | 0.998892 |
| PhCCH+CH3                     | 0.000499929 | 0.999344 | 0.000499953 | 0.999392 |
| rad35                         | 0.000198905 | 0.999543 | 0.000198915 | 0.999591 |
| PhcycC3H3_A+H                 | 0.000160986 | 0.999704 | 0.000160994 | 0.999752 |
| PhcycC3H3_B+H                 | 0.000108569 | 0.999813 | 0.000108575 | 0.999860 |
| Phenyl+cycC3H4                | 4.74535e-05 | 0.999860 | 0.000000    | 0.999860 |
| PAH7+H                        | 4.44307e-05 | 0.999905 | 4.44330e-05 | 0.999905 |
| rad37                         | 3.57977e-05 | 0.999940 | 3.57996e-05 | 0.999941 |
| PAH10+CH3                     | 2.47744e-05 | 0.999965 | 2.47757e-05 | 0.999965 |
| rad39                         | 8.15502e-06 | 0.999973 | 8.15543e-06 | 0.999973 |
| rad30                         | 6.70507e-06 | 0.999980 | 6.70540e-06 | 0.999980 |
| PAH9+H                        | 6.62681e-06 | 0.999987 | 6.62715e-06 | 0.999987 |
| rad38                         | 6.20650e-06 | 0.999993 | 6.20681e-06 | 0.999993 |
| PAH3+H                        | 3.44997e-06 | 0.999996 | 3.45014e-06 | 0.999996 |
| rad46                         | 7.53052e-07 | 0.999997 | 7.53090e-07 | 0.999997 |
| rad54                         | 4.48846e-07 | 0.999997 | 4.48868e-07 | 0.999998 |
| rad60syn                      | 4.32693e-07 | 0.999998 | 4.32715e-07 | 0.999998 |
| rad59                         | 3.79568e-07 | 0.999998 | 3.79587e-07 | 0.999998 |
| rad50                         | 3.42363e-07 | 0.999999 | 3.42380e-07 | 0.999999 |
| PAH1+H                        | 2.85118e-07 | 0.999999 | 2.85132e-07 | 0.999999 |
| rad60anti                     | 2.61580e-07 | 0.999999 | 2.61592e-07 | 0.999999 |
| rad43                         | 1.34199e-07 | 0.999999 | 1.34206e-07 | 0.999999 |
| rad70                         | 9.71331e-08 | 0.999999 | 9.71386e-08 | 1.000000 |
| rad51                         | 5.83538e-08 | 0.999999 | 5.83568e-08 | 1.000000 |
| rad9                          | 4.55179e-08 | 0.999999 | 4.55202e-08 | 1.000000 |
| rad55                         | 2.73131e-08 | 1.000000 | 2.73144e-08 | 1.000000 |
| rad52                         | 2.29855e-08 | 1.000000 | 2.29865e-08 | 1.000000 |
| rad58                         | 1.92035e-08 | 1.000000 | 1.92044e-08 | 1.000000 |
| rad34                         | 1.87457e-08 | 1.000000 | 1.87466e-08 | 1.000000 |
| rad61                         | 1.28399e-08 | 1.000000 | 1.28405e-08 | 1.000000 |
| rad62                         | 1.28156e-08 | 1.000000 | 1.28162e-08 | 1.000000 |
| rad41                         | 5.04831e-09 | 1.000000 | 5.04856e-09 | 1.000000 |
| rad53                         | 3.43675e-09 | 1.000000 | 3.43692e-09 | 1.000000 |
| rad56                         | 2.33978e-09 | 1.000000 | 2.33989e-09 | 1.000000 |
| rad65                         | 1.78405e-09 | 1.000000 | 1.78414e-09 | 1.000000 |
| PAH8+H                        | 1.25008e-09 | 1.000000 | 1.25014e-09 | 1.000000 |
| rad64                         | 1.19315e-09 | 1.000000 | 1.19321e-09 | 1.000000 |
| rad42                         | 5.61788e-10 | 1.000000 | 5.61816e-10 | 1.000000 |
| rad68syn                      | 5.31826e-10 | 1.000000 | 5.31854e-10 | 1.000000 |
| rad68anti                     | 3.50921e-10 | 1.000000 | 3.50939e-10 | 1.000000 |
| rad73                         | 3.33118e-10 | 1.000000 | 3.33134e-10 | 1.000000 |
| rad71                         | 2.96441e-10 | 1.000000 | 2.96456e-10 | 1.000000 |
| rad40syn                      | 2.67700e-10 | 1.000000 | 2.67713e-10 | 1.000000 |
| rad40anti                     | 2.04489e-10 | 1.000000 | 2.04499e-10 | 1.000000 |
| rad12                         | 7.93767e-11 | 1.000000 | 7.93806e-11 | 1.000000 |
| rad15                         | 1.48561e-11 | 1.000000 | 1.48568e-11 | 1.000000 |
| rad23                         | 8.27926e-12 | 1.000000 | 8.27966e-12 | 1.000000 |
| rad72                         | 3.57712e-12 | 1.000000 | 3.57731e-12 | 1.000000 |
| rad19anti                     | 2.56277e-12 | 1.000000 | 2.56290e-12 | 1.000000 |
| rad45                         | 2.25821e-12 | 1.000000 | 2.25832e-12 | 1.000000 |
| rad6                          | 1.90012e-12 | 1.000000 | 1.90022e-12 | 1.000000 |
| rad2                          | 1.69809e-12 | 1.000000 | 1.69817e-12 | 1.000000 |
| rad1                          | 4.88868e-13 | 1.000000 | 4.88892e-13 | 1.000000 |
| rad36                         | 2.32786e-13 | 1.000000 | 2.32798e-13 | 1.000000 |
| rad19syn                      | 1.28391e-13 | 1.000000 | 1.28398e-13 | 1.000000 |
| rad21                         | 9.63849e-14 | 1.000000 | 9.63897e-14 | 1.000000 |
| rad8                          | 7.65089e-14 | 1.000000 | 7.65127e-14 | 1.000000 |
| rad10                         | 7.07552e-14 | 1.000000 | 7.07587e-14 | 1.000000 |
| rad13                         | 3.16163e-14 | 1.000000 | 3.16178e-14 | 1.000000 |
| rad20                         | 2.48848e-14 | 1.000000 | 2.48860e-14 | 1.000000 |
| rad3                          | 1.55442e-14 | 1.000000 | 1.55451e-14 | 1.000000 |

|       |             |          |             |          |
|-------|-------------|----------|-------------|----------|
| rad4  | 1.27130e-14 | 1.000000 | 1.27136e-14 | 1.000000 |
| rad26 | 8.80142e-15 | 1.000000 | 8.80190e-15 | 1.000000 |
| rad33 | 8.69084e-15 | 1.000000 | 8.69125e-15 | 1.000000 |
| rad24 | 7.72327e-15 | 1.000000 | 7.72365e-15 | 1.000000 |
| rad11 | 6.61716e-15 | 1.000000 | 6.61749e-15 | 1.000000 |
| rad22 | 2.15104e-15 | 1.000000 | 2.15115e-15 | 1.000000 |
| rad7  | 1.37082e-15 | 1.000000 | 1.37089e-15 | 1.000000 |
| rad28 | 8.49686e-16 | 1.000000 | 8.49735e-16 | 1.000000 |
| rad25 | 7.88136e-16 | 1.000000 | 7.88175e-16 | 1.000000 |
| rad27 | 4.74042e-16 | 1.000000 | 4.74066e-16 | 1.000000 |
| rad31 | 2.41068e-16 | 1.000000 | 2.41080e-16 | 1.000000 |
| rad18 | 5.23449e-17 | 1.000000 | 5.23476e-17 | 1.000000 |
| rad14 | 3.76803e-17 | 1.000000 | 3.76822e-17 | 1.000000 |
| rad47 | 5.24311e-18 | 1.000000 | 5.24336e-18 | 1.000000 |
| rad5  | 4.18566e-23 | 1.000000 | 4.18587e-23 | 1.000000 |

0.100000000E-01 Pa, 1200.00000 K

| Rate constant             | True (fraction)       | Effective (fraction)  |
|---------------------------|-----------------------|-----------------------|
| Total                     | 3.72623e-12 (1.00 )   | 3.72576e-12 (1.00 )   |
| Formation of rad19        | 2.86288e-12 (0.768 )  | 2.86245e-12 (0.768 )  |
| H-abstraction to cyc2enyl | 6.53266e-13 (0.175 )  | 6.53266e-13 (0.175 )  |
| H-abstraction to cyclenyl | 2.10085e-13 (0.0564 ) | 2.10053e-13 (0.0564 ) |

| species                       | PYtrue      | Cumul    | PYeffective | Cumul    |
|-------------------------------|-------------|----------|-------------|----------|
| Indene+H                      | 0.687506    | 0.687506 | 0.687593    | 0.687593 |
| Benzene+cycloprop-2-enylidene | 0.175315    | 0.862821 | 0.175337    | 0.862930 |
| PhCHCCH2+H                    | 0.0694471   | 0.932268 | 0.0694558   | 0.932386 |
| Benzene+cycloprop-1-enylidene | 0.0563801   | 0.988648 | 0.0563786   | 0.988764 |
| Ph+MeAc                       | 0.00227272  | 0.990921 | 0.00227301  | 0.991037 |
| C2H2+PhCH2                    | 0.00219121  | 0.993112 | 0.00219148  | 0.993229 |
| Ph+Allene                     | 0.00207914  | 0.995192 | 0.00208021  | 0.995309 |
| PhCH2CCH+H                    | 0.00110692  | 0.996299 | 0.00110706  | 0.996416 |
| PhCCCH3+H                     | 0.00101200  | 0.997311 | 0.00101213  | 0.997428 |
| rad67                         | 0.000806305 | 0.998117 | 0.000806414 | 0.998235 |
| PhCCH+CH3                     | 0.000645718 | 0.998763 | 0.000645799 | 0.998881 |
| PhcycC3H3_A+H                 | 0.000345598 | 0.999109 | 0.000345642 | 0.999226 |
| rad35                         | 0.000290170 | 0.999399 | 0.000290207 | 0.999516 |
| PhcycC3H3_B+H                 | 0.000261273 | 0.999660 | 0.000261306 | 0.999778 |
| Phenyl+cycC3H4                | 0.000117514 | 0.999778 | 0.000000    | 0.999778 |
| PAH7+H                        | 6.09152e-05 | 0.999839 | 6.09229e-05 | 0.999839 |
| rad37                         | 5.50994e-05 | 0.999894 | 5.51063e-05 | 0.999894 |
| PAH10+CH3                     | 4.81024e-05 | 0.999942 | 4.81085e-05 | 0.999942 |
| PAH9+H                        | 1.22286e-05 | 0.999954 | 1.22301e-05 | 0.999954 |
| rad38                         | 1.12958e-05 | 0.999965 | 1.12972e-05 | 0.999965 |
| rad39                         | 1.06983e-05 | 0.999976 | 1.06996e-05 | 0.999976 |
| rad30                         | 1.03391e-05 | 0.999986 | 1.03404e-05 | 0.999986 |
| PAH3+H                        | 6.91385e-06 | 0.999993 | 6.91473e-06 | 0.999993 |
| rad46                         | 1.50177e-06 | 0.999995 | 1.50196e-06 | 0.999995 |
| rad50                         | 8.20657e-07 | 0.999996 | 8.20758e-07 | 0.999996 |
| rad54                         | 7.81497e-07 | 0.999996 | 7.81598e-07 | 0.999996 |
| rad60syn                      | 7.65106e-07 | 0.999997 | 7.65203e-07 | 0.999997 |
| rad59                         | 7.35024e-07 | 0.999998 | 7.35117e-07 | 0.999998 |
| PAH1+H                        | 6.15266e-07 | 0.999998 | 6.15343e-07 | 0.999999 |
| rad60anti                     | 4.66713e-07 | 0.999999 | 4.66772e-07 | 0.999999 |
| rad43                         | 2.45552e-07 | 0.999999 | 2.45583e-07 | 0.999999 |
| rad70                         | 1.92606e-07 | 0.999999 | 1.92630e-07 | 0.999999 |
| rad51                         | 1.60726e-07 | 1.000000 | 1.60747e-07 | 1.000000 |
| rad52                         | 5.89524e-08 | 1.000000 | 5.89598e-08 | 1.000000 |
| rad55                         | 4.99977e-08 | 1.000000 | 5.00040e-08 | 1.000000 |
| rad58                         | 4.53339e-08 | 1.000000 | 4.53397e-08 | 1.000000 |
| rad34                         | 3.98659e-08 | 1.000000 | 3.98709e-08 | 1.000000 |
| rad61                         | 3.33586e-08 | 1.000000 | 3.33628e-08 | 1.000000 |
| rad9                          | 3.18605e-08 | 1.000000 | 3.18645e-08 | 1.000000 |
| rad62                         | 2.11968e-08 | 1.000000 | 2.11995e-08 | 1.000000 |
| rad41                         | 1.09918e-08 | 1.000000 | 1.09932e-08 | 1.000000 |
| rad53                         | 7.65067e-09 | 1.000000 | 7.65163e-09 | 1.000000 |
| rad56                         | 5.79410e-09 | 1.000000 | 5.79483e-09 | 1.000000 |
| rad65                         | 4.84130e-09 | 1.000000 | 4.84190e-09 | 1.000000 |
| PAH8+H                        | 4.08184e-09 | 1.000000 | 4.08236e-09 | 1.000000 |
| rad64                         | 2.59997e-09 | 1.000000 | 2.60030e-09 | 1.000000 |
| rad68syn                      | 1.43969e-09 | 1.000000 | 1.43987e-09 | 1.000000 |
| rad73                         | 1.32848e-09 | 1.000000 | 1.32864e-09 | 1.000000 |
| rad71                         | 1.32098e-09 | 1.000000 | 1.32115e-09 | 1.000000 |
| rad42                         | 1.07986e-09 | 1.000000 | 1.08000e-09 | 1.000000 |
| rad68anti                     | 9.46828e-10 | 1.000000 | 9.46949e-10 | 1.000000 |
| rad40syn                      | 8.05990e-10 | 1.000000 | 8.06091e-10 | 1.000000 |
| rad40anti                     | 6.21794e-10 | 1.000000 | 6.21872e-10 | 1.000000 |



|           |             |          |             |          |
|-----------|-------------|----------|-------------|----------|
| rad12     | 7.13614e-11 | 1.000000 | 7.13704e-11 | 1.000000 |
| rad72     | 2.08696e-11 | 1.000000 | 2.08723e-11 | 1.000000 |
| rad15     | 1.36903e-11 | 1.000000 | 1.36921e-11 | 1.000000 |
| rad23     | 7.63171e-12 | 1.000000 | 7.63267e-12 | 1.000000 |
| rad45     | 2.20115e-12 | 1.000000 | 2.20143e-12 | 1.000000 |
| rad19anti | 1.93812e-12 | 1.000000 | 1.93836e-12 | 1.000000 |
| rad6      | 1.57858e-12 | 1.000000 | 1.57878e-12 | 1.000000 |
| rad2      | 1.28394e-12 | 1.000000 | 1.28411e-12 | 1.000000 |
| rad1      | 3.69319e-13 | 1.000000 | 3.69366e-13 | 1.000000 |
| rad8      | 2.53543e-13 | 1.000000 | 2.53575e-13 | 1.000000 |
| rad36     | 2.26137e-13 | 1.000000 | 2.26166e-13 | 1.000000 |
| rad21     | 2.06298e-13 | 1.000000 | 2.06323e-13 | 1.000000 |
| rad13     | 1.26266e-13 | 1.000000 | 1.26282e-13 | 1.000000 |
| rad19syn  | 1.13955e-13 | 1.000000 | 1.13970e-13 | 1.000000 |
| rad11     | 1.03347e-13 | 1.000000 | 1.03360e-13 | 1.000000 |
| rad10     | 6.90012e-14 | 1.000000 | 6.90099e-14 | 1.000000 |
| rad20     | 5.30687e-14 | 1.000000 | 5.30754e-14 | 1.000000 |
| rad33     | 1.49701e-14 | 1.000000 | 1.49720e-14 | 1.000000 |
| rad24     | 1.18501e-14 | 1.000000 | 1.18516e-14 | 1.000000 |
| rad3      | 1.10251e-14 | 1.000000 | 1.10265e-14 | 1.000000 |
| rad4      | 8.98033e-15 | 1.000000 | 8.98147e-15 | 1.000000 |
| rad7      | 8.80485e-15 | 1.000000 | 8.80600e-15 | 1.000000 |
| rad26     | 6.94813e-15 | 1.000000 | 6.94901e-15 | 1.000000 |
| rad25     | 2.92616e-15 | 1.000000 | 2.92653e-15 | 1.000000 |
| rad22     | 2.41766e-15 | 1.000000 | 2.41796e-15 | 1.000000 |
| rad18     | 1.66200e-15 | 1.000000 | 1.66221e-15 | 1.000000 |
| rad27     | 1.52436e-15 | 1.000000 | 1.52456e-15 | 1.000000 |
| rad28     | 6.88414e-16 | 1.000000 | 6.88501e-16 | 1.000000 |
| rad31     | 2.55729e-16 | 1.000000 | 2.55762e-16 | 1.000000 |
| rad14     | 1.33043e-16 | 1.000000 | 1.33060e-16 | 1.000000 |
| rad47     | 1.43385e-17 | 1.000000 | 1.43403e-17 | 1.000000 |
| rad5      | 1.27725e-21 | 1.000000 | 1.27742e-21 | 1.000000 |

0.100000000E-01 Pa, 1300.00000 K

| Rate constant             | True (fraction)       | Effective (fraction)  |
|---------------------------|-----------------------|-----------------------|
| Total                     | 4.84401e-12 (1.00 )   | 4.84262e-12 (1.00 )   |
| Formation of rad19        | 3.55537e-12 (0.734 )  | 3.55411e-12 (0.734 )  |
| H-abstraction to cyc2enyl | 9.48893e-13 (0.196 )  | 9.48893e-13 (0.196 )  |
| H-abstraction to cyc1enyl | 3.39740e-13 (0.0701 ) | 3.39620e-13 (0.0701 ) |

| species                       | PYtrue      | Cumul    | PYeffective | Cumul    |
|-------------------------------|-------------|----------|-------------|----------|
| Indene+H                      | 0.627161    | 0.627161 | 0.627340    | 0.627340 |
| Benzene+cycloprop-2-enylidene | 0.195890    | 0.823051 | 0.195946    | 0.823286 |
| PhCHCCH2+H                    | 0.0908777   | 0.913928 | 0.0909037   | 0.914190 |
| Benzene+cycloprop-1-enylidene | 0.0701362   | 0.984065 | 0.0701313   | 0.984321 |
| Ph+MeAc                       | 0.00304441  | 0.987109 | 0.00304528  | 0.987366 |
| C2H2+PhCH2                    | 0.00290372  | 0.990013 | 0.00290455  | 0.990271 |
| Ph+Allene                     | 0.00288470  | 0.992898 | 0.00288553  | 0.993157 |
| PhCH2CCH+H                    | 0.00165448  | 0.994552 | 0.00165495  | 0.994812 |
| PhCCCH3+H                     | 0.00130153  | 0.995854 | 0.00130190  | 0.996113 |
| rad67                         | 0.00110884  | 0.996962 | 0.00110915  | 0.997223 |
| PhCCH+CH3                     | 0.000809522 | 0.997772 | 0.000809751 | 0.998032 |
| PhcycC3H3_A+H                 | 0.000673391 | 0.998445 | 0.000673584 | 0.998706 |
| PhcycC3H3_B+H                 | 0.000561394 | 0.999007 | 0.000561554 | 0.999267 |
| rad35                         | 0.000398725 | 0.999405 | 0.000398838 | 0.999666 |
| Phenyl+cycC3H4                | 0.000260506 | 0.999666 | 0.000000    | 0.999666 |
| PAH10+CH3                     | 8.38007e-05 | 0.999750 | 8.38250e-05 | 0.999750 |
| PAH7+H                        | 7.89117e-05 | 0.999829 | 7.89341e-05 | 0.999829 |
| rad37                         | 7.83568e-05 | 0.999907 | 7.83793e-05 | 0.999907 |
| PAH9+H                        | 2.08511e-05 | 0.999928 | 2.08571e-05 | 0.999928 |
| rad38                         | 1.88167e-05 | 0.999947 | 1.88221e-05 | 0.999947 |
| rad30                         | 1.49360e-05 | 0.999962 | 1.49402e-05 | 0.999962 |
| rad39                         | 1.33374e-05 | 0.999975 | 1.33412e-05 | 0.999975 |
| PAH3+H                        | 1.25733e-05 | 0.999987 | 1.25768e-05 | 0.999988 |
| rad46                         | 2.73966e-06 | 0.999990 | 2.74044e-06 | 0.999991 |
| rad50                         | 1.75696e-06 | 0.999992 | 1.75747e-06 | 0.999992 |
| rad59                         | 1.29584e-06 | 0.999993 | 1.29621e-06 | 0.999994 |
| rad60syn                      | 1.24693e-06 | 0.999995 | 1.24728e-06 | 0.999995 |
| rad54                         | 1.23055e-06 | 0.999996 | 1.23091e-06 | 0.999996 |
| PAH1+H                        | 1.18164e-06 | 0.999997 | 1.18197e-06 | 0.999997 |
| rad60anti                     | 7.66606e-07 | 0.999998 | 7.66824e-07 | 0.999998 |
| rad43                         | 4.10006e-07 | 0.999998 | 4.10124e-07 | 0.999999 |
| rad51                         | 3.87410e-07 | 0.999998 | 3.87521e-07 | 0.999999 |
| rad70                         | 3.43678e-07 | 0.999999 | 3.43777e-07 | 0.999999 |
| rad52                         | 1.33629e-07 | 0.999999 | 1.33667e-07 | 0.999999 |
| rad58                         | 9.48441e-08 | 0.999999 | 9.48712e-08 | 1.000000 |
| rad55                         | 8.22139e-08 | 0.999999 | 8.22375e-08 | 1.000000 |

|           |             |          |             |          |
|-----------|-------------|----------|-------------|----------|
| rad34     | 7.56235e-08 | 0.999999 | 7.56454e-08 | 1.000000 |
| rad61     | 7.45093e-08 | 0.999999 | 7.45306e-08 | 1.000000 |
| rad62     | 3.23565e-08 | 0.999999 | 3.23658e-08 | 1.000000 |
| rad41     | 2.13213e-08 | 0.999999 | 2.13274e-08 | 1.000000 |
| rad9      | 2.08206e-08 | 0.999999 | 2.08266e-08 | 1.000000 |
| rad53     | 1.49188e-08 | 0.999999 | 1.49231e-08 | 1.000000 |
| rad56     | 1.23747e-08 | 0.999999 | 1.23783e-08 | 1.000000 |
| rad65     | 1.15037e-08 | 0.999999 | 1.15070e-08 | 1.000000 |
| PAH8+H    | 1.11833e-08 | 0.999999 | 1.11865e-08 | 1.000000 |
| rad64     | 5.02552e-09 | 0.999999 | 5.02696e-09 | 1.000000 |
| rad71     | 4.76269e-09 | 0.999999 | 4.76405e-09 | 1.000000 |
| rad73     | 4.36525e-09 | 0.999999 | 4.36649e-09 | 1.000000 |
| rad68syn  | 3.35948e-09 | 0.999999 | 3.36043e-09 | 1.000000 |
| rad68anti | 2.20312e-09 | 0.999999 | 2.20375e-09 | 1.000000 |
| rad40syn  | 2.06134e-09 | 0.999999 | 2.06192e-09 | 1.000000 |
| rad42     | 1.87919e-09 | 0.999999 | 1.87972e-09 | 1.000000 |
| rad40anti | 1.60446e-09 | 0.999999 | 1.60491e-09 | 1.000000 |
| rad72     | 9.34671e-11 | 0.999999 | 9.34937e-11 | 1.000000 |
| rad12     | 5.89859e-11 | 0.999999 | 5.90028e-11 | 1.000000 |
| rad15     | 1.73161e-11 | 0.999999 | 1.73210e-11 | 1.000000 |
| rad23     | 7.03975e-12 | 0.999999 | 7.04175e-12 | 1.000000 |
| rad45     | 2.07908e-12 | 0.999999 | 2.07967e-12 | 1.000000 |
| rad6      | 1.76082e-12 | 0.999999 | 1.76133e-12 | 1.000000 |
| rad19anti | 1.48394e-12 | 0.999999 | 1.48437e-12 | 1.000000 |
| rad2      | 9.56052e-13 | 0.999999 | 9.56330e-13 | 1.000000 |
| rad11     | 5.90217e-13 | 0.999999 | 5.90386e-13 | 1.000000 |
| rad8      | 4.42250e-13 | 0.999999 | 4.42376e-13 | 1.000000 |
| rad21     | 3.03547e-13 | 0.999999 | 3.03634e-13 | 1.000000 |
| rad1      | 2.76550e-13 | 0.999999 | 2.76629e-13 | 1.000000 |
| rad13     | 2.24608e-13 | 0.999999 | 2.24671e-13 | 1.000000 |
| rad36     | 2.14288e-13 | 0.999999 | 2.14349e-13 | 1.000000 |
| rad10     | 1.08228e-13 | 0.999999 | 1.08259e-13 | 1.000000 |
| rad19syn  | 1.00706e-13 | 0.999999 | 1.00735e-13 | 1.000000 |
| rad7      | 8.80878e-14 | 0.999999 | 8.81125e-14 | 1.000000 |
| rad20     | 7.38370e-14 | 0.999999 | 7.38583e-14 | 1.000000 |
| rad33     | 1.76734e-14 | 0.999999 | 1.76785e-14 | 1.000000 |
| rad18     | 1.54474e-14 | 0.999999 | 1.54518e-14 | 1.000000 |
| rad24     | 1.53474e-14 | 0.999999 | 1.53518e-14 | 1.000000 |
| rad3      | 7.76463e-15 | 0.999999 | 7.76681e-15 | 1.000000 |
| rad4      | 6.29456e-15 | 0.999999 | 6.29635e-15 | 1.000000 |
| rad26     | 5.95014e-15 | 0.999999 | 5.95184e-15 | 1.000000 |
| rad25     | 5.66816e-15 | 0.999999 | 5.66977e-15 | 1.000000 |
| rad22     | 2.73264e-15 | 0.999999 | 2.73341e-15 | 1.000000 |
| rad27     | 2.70903e-15 | 0.999999 | 2.70980e-15 | 1.000000 |
| rad28     | 6.71874e-16 | 0.999999 | 6.72066e-16 | 1.000000 |
| rad31     | 2.62744e-16 | 0.999999 | 2.62819e-16 | 1.000000 |
| rad14     | 2.41081e-16 | 0.999999 | 2.41150e-16 | 1.000000 |
| rad47     | 3.40952e-17 | 0.999999 | 3.41049e-17 | 1.000000 |
| rad5      | 4.93867e-20 | 0.999999 | 4.94008e-20 | 1.000000 |

0.100000000E-01 Pa, 1400.00000 K

| Rate constant             | True (fraction)       | Effective (fraction)  |
|---------------------------|-----------------------|-----------------------|
| Total                     | 6.19360e-12 (1.00 )   | 6.18997e-12 (1.00 )   |
| Formation of rad19        | 4.34185e-12 (0.701 )  | 4.33861e-12 (0.701 )  |
| H-abstraction to cyc2enyl | 1.32990e-12 (0.215 )  | 1.32990e-12 (0.215 )  |
| H-abstraction to cyclenyl | 5.21850e-13 (0.0843 ) | 5.21461e-13 (0.0842 ) |

| species                       | PYtrue      | Cumul    | PYeffective | Cumul    |
|-------------------------------|-------------|----------|-------------|----------|
| Indene+H                      | 0.566028    | 0.566028 | 0.566360    | 0.566360 |
| Benzene+cycloprop-2-enylidene | 0.214721    | 0.780749 | 0.214847    | 0.781207 |
| PhCHCCH2+H                    | 0.113526    | 0.894275 | 0.113593    | 0.894800 |
| Benzene+cycloprop-1-enylidene | 0.0842564   | 0.978532 | 0.0842429   | 0.979043 |
| Ph+MeAc                       | 0.00387284  | 0.982405 | 0.00387511  | 0.982918 |
| Ph+Allene                     | 0.00376036  | 0.986165 | 0.00376257  | 0.986680 |
| C2H2+PhCH2                    | 0.00367929  | 0.989844 | 0.00368145  | 0.990362 |
| PhCH2CCH+H                    | 0.00231297  | 0.992157 | 0.00231433  | 0.992676 |
| PhCCCH3+H                     | 0.00159640  | 0.993754 | 0.00159734  | 0.994274 |
| rad67                         | 0.00144410  | 0.995198 | 0.00144494  | 0.995719 |
| PhcycC3H3_A+H                 | 0.00120489  | 0.996403 | 0.00120559  | 0.996924 |
| PhcycC3H3_B+H                 | 0.00109183  | 0.997495 | 0.00109247  | 0.998017 |
| PhCCH+CH3                     | 0.000988680 | 0.998483 | 0.000989264 | 0.999006 |
| Phenyl+cycC3H4                | 0.000523345 | 0.999007 | 0.000000    | 0.999006 |
| rad35                         | 0.000519418 | 0.999526 | 0.000519722 | 0.999526 |
| PAH10+CH3                     | 0.000132940 | 0.999659 | 0.000133019 | 0.999659 |
| rad37                         | 0.000103969 | 0.999763 | 0.000104030 | 0.999763 |
| PAH7+H                        | 9.76629e-05 | 0.999861 | 9.77202e-05 | 0.999860 |
| PAH9+H                        | 3.30452e-05 | 0.999894 | 3.30646e-05 | 0.999893 |

|           |             |          |             |          |
|-----------|-------------|----------|-------------|----------|
| rad38     | 2.89869e-05 | 0.999923 | 2.90039e-05 | 0.999922 |
| PAH3+H    | 2.09773e-05 | 0.999944 | 2.09896e-05 | 0.999943 |
| rad30     | 2.03484e-05 | 0.999964 | 2.03603e-05 | 0.999964 |
| rad39     | 1.60326e-05 | 0.999980 | 1.60420e-05 | 0.999980 |
| rad46     | 4.60489e-06 | 0.999985 | 4.60759e-06 | 0.999984 |
| rad50     | 3.39256e-06 | 0.999988 | 3.39456e-06 | 0.999988 |
| rad59     | 2.10237e-06 | 0.999990 | 2.10360e-06 | 0.999990 |
| PAH1+H    | 2.05214e-06 | 0.999992 | 2.05334e-06 | 0.999992 |
| rad60syn  | 1.88965e-06 | 0.999994 | 1.89076e-06 | 0.999994 |
| rad54     | 1.78086e-06 | 0.999996 | 1.78190e-06 | 0.999996 |
| rad60anti | 1.16973e-06 | 0.999997 | 1.17042e-06 | 0.999997 |
| rad51     | 8.27129e-07 | 0.999998 | 8.27620e-07 | 0.999998 |
| rad43     | 6.31782e-07 | 0.999998 | 6.32153e-07 | 0.999998 |
| rad70     | 5.60218e-07 | 0.999999 | 5.60546e-07 | 0.999999 |
| rad52     | 2.70714e-07 | 0.999999 | 2.70873e-07 | 0.999999 |
| rad58     | 1.78428e-07 | 0.999999 | 1.78532e-07 | 0.999999 |
| rad61     | 1.46278e-07 | 1.000000 | 1.46364e-07 | 0.999999 |
| rad34     | 1.30056e-07 | 1.000000 | 1.30132e-07 | 1.000000 |
| rad55     | 1.23571e-07 | 1.000000 | 1.23644e-07 | 1.000000 |
| rad62     | 4.61529e-08 | 1.000000 | 4.61800e-08 | 1.000000 |
| rad41     | 3.74002e-08 | 1.000000 | 3.74222e-08 | 1.000000 |
| PAH8+H    | 2.63150e-08 | 1.000000 | 2.63304e-08 | 1.000000 |
| rad53     | 2.60384e-08 | 1.000000 | 2.60537e-08 | 1.000000 |
| rad65     | 2.42341e-08 | 1.000000 | 2.42483e-08 | 1.000000 |
| rad56     | 2.33522e-08 | 1.000000 | 2.33660e-08 | 1.000000 |
| rad71     | 1.41524e-08 | 1.000000 | 1.41607e-08 | 1.000000 |
| rad9      | 1.32226e-08 | 1.000000 | 1.32304e-08 | 1.000000 |
| rad73     | 1.20323e-08 | 1.000000 | 1.20394e-08 | 1.000000 |
| rad64     | 8.79755e-09 | 1.000000 | 8.80273e-09 | 1.000000 |
| rad68syn  | 6.90098e-09 | 1.000000 | 6.90504e-09 | 1.000000 |
| rad40syn  | 4.57746e-09 | 1.000000 | 4.58014e-09 | 1.000000 |
| rad68anti | 4.51465e-09 | 1.000000 | 4.51730e-09 | 1.000000 |
| rad40anti | 3.59046e-09 | 1.000000 | 3.59257e-09 | 1.000000 |
| rad42     | 3.00667e-09 | 1.000000 | 3.00843e-09 | 1.000000 |
| rad72     | 3.28510e-10 | 1.000000 | 3.28702e-10 | 1.000000 |
| rad12     | 4.68960e-11 | 1.000000 | 4.69235e-11 | 1.000000 |
| rad15     | 4.14383e-11 | 1.000000 | 4.14626e-11 | 1.000000 |
| rad23     | 6.53061e-12 | 1.000000 | 6.53444e-12 | 1.000000 |
| rad6      | 2.21215e-12 | 1.000000 | 2.21345e-12 | 1.000000 |
| rad45     | 1.92108e-12 | 1.000000 | 1.92221e-12 | 1.000000 |
| rad11     | 1.47984e-12 | 1.000000 | 1.48071e-12 | 1.000000 |
| rad19anti | 1.15118e-12 | 1.000000 | 1.15186e-12 | 1.000000 |
| rad2      | 7.07514e-13 | 1.000000 | 7.07926e-13 | 1.000000 |
| rad8      | 5.66688e-13 | 1.000000 | 5.67021e-13 | 1.000000 |
| rad21     | 3.67070e-13 | 1.000000 | 3.67285e-13 | 1.000000 |
| rad7      | 3.62005e-13 | 1.000000 | 3.62218e-13 | 1.000000 |
| rad10     | 2.84529e-13 | 1.000000 | 2.84696e-13 | 1.000000 |
| rad13     | 2.61059e-13 | 1.000000 | 2.61212e-13 | 1.000000 |
| rad1      | 2.06712e-13 | 1.000000 | 2.06833e-13 | 1.000000 |
| rad36     | 1.99178e-13 | 1.000000 | 1.99295e-13 | 1.000000 |
| rad19syn  | 8.90593e-14 | 1.000000 | 8.91116e-14 | 1.000000 |
| rad20     | 8.29001e-14 | 1.000000 | 8.29485e-14 | 1.000000 |
| rad18     | 5.39737e-14 | 1.000000 | 5.40053e-14 | 1.000000 |
| rad24     | 1.80314e-14 | 1.000000 | 1.80420e-14 | 1.000000 |
| rad33     | 1.72626e-14 | 1.000000 | 1.72727e-14 | 1.000000 |
| rad26     | 8.25293e-15 | 1.000000 | 8.25777e-15 | 1.000000 |
| rad25     | 7.72660e-15 | 1.000000 | 7.73118e-15 | 1.000000 |
| rad3      | 5.46706e-15 | 1.000000 | 5.47027e-15 | 1.000000 |
| rad4      | 4.40428e-15 | 1.000000 | 4.40686e-15 | 1.000000 |
| rad27     | 3.50766e-15 | 1.000000 | 3.50972e-15 | 1.000000 |
| rad22     | 3.01883e-15 | 1.000000 | 3.02060e-15 | 1.000000 |
| rad28     | 7.85264e-16 | 1.000000 | 7.85720e-16 | 1.000000 |
| rad14     | 3.02748e-16 | 1.000000 | 3.02926e-16 | 1.000000 |
| rad31     | 2.62635e-16 | 1.000000 | 2.62789e-16 | 1.000000 |
| rad47     | 7.15120e-17 | 1.000000 | 7.15538e-17 | 1.000000 |
| rad5      | 1.69321e-18 | 1.000000 | 1.69421e-18 | 1.000000 |

0.100000000E-01 Pa, 1500.00000 K

| Rate constant             | True (fraction)       | Effective (fraction)  |
|---------------------------|-----------------------|-----------------------|
| Total                     | 7.80417e-12 (1.00 )   | 7.79561e-12 (1.00 )   |
| Formation of rad19        | 5.22661e-12 (0.670 )  | 5.21915e-12 (0.669 )  |
| H-abstraction to cyc2enyl | 1.80920e-12 (0.232 )  | 1.80920e-12 (0.232 )  |
| H-abstraction to cyc1enyl | 7.68359e-13 (0.0985 ) | 7.67262e-13 (0.0984 ) |

  

| species                       | PYtrue   | Cumul    | PYeffective | Cumul    |
|-------------------------------|----------|----------|-------------|----------|
| Indene+H                      | 0.505870 | 0.505870 | 0.506425    | 0.506425 |
| Benzene+cycloprop-2-enylidene | 0.231825 | 0.737695 | 0.232079    | 0.738505 |

|                               |             |          |             |          |
|-------------------------------|-------------|----------|-------------|----------|
| PhCHCCH2+H                    | 0.135967    | 0.873662 | 0.136116    | 0.874621 |
| Benzene+cycloprop-1-enylidene | 0.0984549   | 0.972117 | 0.0984223   | 0.973043 |
| Ph+MeAc                       | 0.00470570  | 0.976823 | 0.00471086  | 0.977754 |
| Ph+Allene                     | 0.00464760  | 0.981470 | 0.00465271  | 0.982407 |
| C2H2+PhCH2                    | 0.00447301  | 0.985943 | 0.00447792  | 0.986885 |
| PhCH2CCH+H                    | 0.00304820  | 0.988991 | 0.00305154  | 0.989936 |
| PhcycC3H3_A+H                 | 0.00198976  | 0.990981 | 0.00199195  | 0.991928 |
| PhcycC3H3_B+H                 | 0.00193280  | 0.992914 | 0.00193492  | 0.993863 |
| PhCCCH3+H                     | 0.00187667  | 0.994791 | 0.00187873  | 0.995742 |
| rad67                         | 0.00179097  | 0.996582 | 0.00179294  | 0.997535 |
| PhCCH+CH3                     | 0.00117783  | 0.997759 | 0.00117912  | 0.998714 |
| Phenyl+cycC3H4                | 0.000956146 | 0.998716 | 0.000000    | 0.998714 |
| rad35                         | 0.000644848 | 0.999360 | 0.000645556 | 0.999360 |
| PAH10+CH3                     | 0.000194191 | 0.999555 | 0.000194404 | 0.999554 |
| rad37                         | 0.000129807 | 0.999684 | 0.000129949 | 0.999684 |
| PAH7+H                        | 0.000116417 | 0.999801 | 0.000116546 | 0.999800 |
| PAH9+H                        | 4.88535e-05 | 0.999850 | 4.89072e-05 | 0.999849 |
| rad38                         | 4.16011e-05 | 0.999891 | 4.16467e-05 | 0.999891 |
| PAH3+H                        | 3.23374e-05 | 0.999924 | 3.23729e-05 | 0.999923 |
| rad30                         | 2.62808e-05 | 0.999950 | 2.63097e-05 | 0.999950 |
| rad39                         | 1.87895e-05 | 0.999969 | 1.88102e-05 | 0.999969 |
| rad46                         | 7.16199e-06 | 0.999976 | 7.16986e-06 | 0.999976 |
| rad50                         | 5.93797e-06 | 0.999982 | 5.94450e-06 | 0.999982 |
| PAH1+H                        | 3.25723e-06 | 0.999985 | 3.26081e-06 | 0.999985 |
| rad59                         | 3.16156e-06 | 0.999988 | 3.16503e-06 | 0.999988 |
| rad60syn                      | 2.67968e-06 | 0.999991 | 2.68262e-06 | 0.999991 |
| rad54                         | 2.39838e-06 | 0.999993 | 2.40102e-06 | 0.999993 |
| rad60anti                     | 1.66867e-06 | 0.999995 | 1.67050e-06 | 0.999995 |
| rad51                         | 1.57342e-06 | 0.999997 | 1.57515e-06 | 0.999996 |
| rad43                         | 9.05576e-07 | 0.999997 | 9.06568e-07 | 0.999997 |
| rad70                         | 8.42763e-07 | 0.999998 | 8.43688e-07 | 0.999998 |
| rad52                         | 4.92950e-07 | 0.999999 | 4.93491e-07 | 0.999999 |
| rad58                         | 3.04448e-07 | 0.999999 | 3.04782e-07 | 0.999999 |
| rad61                         | 2.56145e-07 | 0.999999 | 2.56426e-07 | 0.999999 |
| rad34                         | 2.04934e-07 | 1.000000 | 2.05160e-07 | 0.999999 |
| rad55                         | 1.72012e-07 | 1.000000 | 1.72201e-07 | 1.000000 |
| rad62                         | 6.20586e-08 | 1.000000 | 6.21267e-08 | 1.000000 |
| rad41                         | 5.99063e-08 | 1.000000 | 5.99721e-08 | 1.000000 |
| PAH8+H                        | 5.38671e-08 | 1.000000 | 5.39263e-08 | 1.000000 |
| rad65                         | 4.55485e-08 | 1.000000 | 4.55985e-08 | 1.000000 |
| rad53                         | 4.12866e-08 | 1.000000 | 4.13319e-08 | 1.000000 |
| rad56                         | 3.95671e-08 | 1.000000 | 3.96106e-08 | 1.000000 |
| rad71                         | 3.49994e-08 | 1.000000 | 3.50379e-08 | 1.000000 |
| rad73                         | 2.80691e-08 | 1.000000 | 2.80999e-08 | 1.000000 |
| rad64                         | 1.41255e-08 | 1.000000 | 1.41409e-08 | 1.000000 |
| rad68syn                      | 1.26336e-08 | 1.000000 | 1.26475e-08 | 1.000000 |
| rad40syn                      | 8.93588e-09 | 1.000000 | 8.94564e-09 | 1.000000 |
| rad9                          | 8.34351e-09 | 1.000000 | 8.35266e-09 | 1.000000 |
| rad68anti                     | 8.24821e-09 | 1.000000 | 8.25726e-09 | 1.000000 |
| rad40anti                     | 7.05383e-09 | 1.000000 | 7.06160e-09 | 1.000000 |
| rad42                         | 4.46777e-09 | 1.000000 | 4.47268e-09 | 1.000000 |
| rad72                         | 9.20557e-10 | 1.000000 | 9.21571e-10 | 1.000000 |
| rad15                         | 7.77391e-11 | 1.000000 | 7.78245e-11 | 1.000000 |
| rad12                         | 3.66372e-11 | 1.000000 | 3.66775e-11 | 1.000000 |
| rad23                         | 6.04656e-12 | 1.000000 | 6.05320e-12 | 1.000000 |
| rad6                          | 2.79578e-12 | 1.000000 | 2.79885e-12 | 1.000000 |
| rad11                         | 2.23593e-12 | 1.000000 | 2.23838e-12 | 1.000000 |
| rad45                         | 1.74470e-12 | 1.000000 | 1.74661e-12 | 1.000000 |
| rad19anti                     | 9.04725e-13 | 1.000000 | 9.05717e-13 | 1.000000 |
| rad7                          | 7.20565e-13 | 1.000000 | 7.21351e-13 | 1.000000 |
| rad8                          | 6.24615e-13 | 1.000000 | 6.25301e-13 | 1.000000 |
| rad10                         | 5.69402e-13 | 1.000000 | 5.70027e-13 | 1.000000 |
| rad2                          | 5.23240e-13 | 1.000000 | 5.23814e-13 | 1.000000 |
| rad21                         | 3.97620e-13 | 1.000000 | 3.98057e-13 | 1.000000 |
| rad13                         | 2.43564e-13 | 1.000000 | 2.43831e-13 | 1.000000 |
| rad36                         | 1.82111e-13 | 1.000000 | 1.82310e-13 | 1.000000 |
| rad1                          | 1.54790e-13 | 1.000000 | 1.54961e-13 | 1.000000 |
| rad18                         | 1.01612e-13 | 1.000000 | 1.01724e-13 | 1.000000 |
| rad20                         | 8.29790e-14 | 1.000000 | 8.30700e-14 | 1.000000 |
| rad19syn                      | 7.89908e-14 | 1.000000 | 7.90771e-14 | 1.000000 |
| rad26                         | 3.62221e-14 | 1.000000 | 3.62618e-14 | 1.000000 |
| rad24                         | 1.99082e-14 | 1.000000 | 1.99301e-14 | 1.000000 |
| rad33                         | 1.52243e-14 | 1.000000 | 1.52411e-14 | 1.000000 |
| rad25                         | 8.67529e-15 | 1.000000 | 8.68480e-15 | 1.000000 |
| rad3                          | 3.86475e-15 | 1.000000 | 3.86899e-15 | 1.000000 |
| rad27                         | 3.81201e-15 | 1.000000 | 3.81619e-15 | 1.000000 |
| rad22                         | 3.46941e-15 | 1.000000 | 3.47322e-15 | 1.000000 |
| rad4                          | 3.08730e-15 | 1.000000 | 3.09069e-15 | 1.000000 |
| rad28                         | 1.45694e-15 | 1.000000 | 1.45854e-15 | 1.000000 |
| rad14                         | 3.12828e-16 | 1.000000 | 3.13172e-16 | 1.000000 |

|       |             |         |             |          |
|-------|-------------|---------|-------------|----------|
| rad31 | 2.56266e-16 | 1.00000 | 2.56547e-16 | 1.000000 |
| rad47 | 1.33181e-16 | 1.00000 | 1.33327e-16 | 1.000000 |
| rad5  | 3.72549e-17 | 1.00000 | 3.72958e-17 | 1.000000 |

0.100000000E-02 Pa, 20.0000000 K

| Rate constant             | True (fraction)         | Effective (fraction)    |
|---------------------------|-------------------------|-------------------------|
| Total                     | 1.24541e-22 (1.00 )     | 1.24541e-22 (1.00 )     |
| Formation of rad19        | 1.24541e-22 (1.00 )     | 1.24541e-22 (1.00 )     |
| H-abstraction to cyc2enyl | 3.84323e-68 (3.09e-46)  | 3.84323e-68 (3.09e-46)  |
| H-abstraction to cyc1enyl | 6.26313e-106 (5.03e-84) | 6.26313e-106 (5.03e-84) |

| species        | PYtrue      | Cumul    | PYeffective | Cumul    |
|----------------|-------------|----------|-------------|----------|
| Indene+H       | 0.999772    | 0.999772 | 0.999772    | 0.999772 |
| PhCHCCH2+H     | 0.000217172 | 0.999989 | 0.000217172 | 0.999989 |
| PhCCH+CH3      | 3.74878e-06 | 0.999993 | 3.74878e-06 | 0.999993 |
| C2H2+PhCH2     | 2.65833e-06 | 0.999996 | 2.65833e-06 | 0.999996 |
| PhCCCH3+H      | 2.10725e-06 | 0.999998 | 2.10725e-06 | 0.999998 |
| Ph+MeAc        | 1.55499e-06 | 0.999999 | 1.55499e-06 | 0.999999 |
| rad67          | 4.71966e-07 | 1.000000 | 4.71966e-07 | 1.000000 |
| rad35          | 2.09037e-07 | 1.000000 | 2.09037e-07 | 1.000000 |
| Ph+Allene      | 1.34165e-07 | 1.000000 | 1.34165e-07 | 1.000000 |
| PAH7+H         | 1.77837e-08 | 1.000000 | 1.77837e-08 | 1.000000 |
| PhCH2CCH+H     | 1.62906e-08 | 1.000000 | 1.62906e-08 | 1.000000 |
| rad39          | 5.01485e-09 | 1.000000 | 5.01485e-09 | 1.000000 |
| rad37          | 4.62554e-09 | 1.000000 | 4.62554e-09 | 1.000000 |
| rad30          | 3.90687e-09 | 1.000000 | 3.90687e-09 | 1.000000 |
| PAH9+H         | 2.53423e-10 | 1.000000 | 2.53423e-10 | 1.000000 |
| rad38          | 1.06722e-10 | 1.000000 | 1.06722e-10 | 1.000000 |
| rad60syn       | 1.69251e-11 | 1.000000 | 1.69251e-11 | 1.000000 |
| rad60anti      | 8.26215e-12 | 1.000000 | 8.26215e-12 | 1.000000 |
| PAH3+H         | 6.71771e-12 | 1.000000 | 6.71771e-12 | 1.000000 |
| rad46          | 6.40767e-12 | 1.000000 | 6.40767e-12 | 1.000000 |
| PAH10+CH3      | 5.52551e-12 | 1.000000 | 5.52551e-12 | 1.000000 |
| rad59          | 1.39391e-12 | 1.000000 | 1.39391e-12 | 1.000000 |
| PhcycC3H3_A+H  | 4.13603e-13 | 1.000000 | 4.13603e-13 | 1.000000 |
| rad43          | 2.58612e-13 | 1.000000 | 2.58612e-13 | 1.000000 |
| rad54          | 2.04091e-13 | 1.000000 | 2.04091e-13 | 1.000000 |
| rad62          | 5.53139e-14 | 1.000000 | 5.53139e-14 | 1.000000 |
| rad50          | 4.21351e-14 | 1.000000 | 4.21351e-14 | 1.000000 |
| rad6           | 6.13621e-15 | 1.000000 | 6.13621e-15 | 1.000000 |
| rad70          | 3.11525e-15 | 1.000000 | 3.11525e-15 | 1.000000 |
| rad55          | 1.36378e-15 | 1.000000 | 1.36378e-15 | 1.000000 |
| PAH1+H         | 5.54098e-16 | 1.000000 | 5.54098e-16 | 1.000000 |
| rad52          | 2.66282e-16 | 1.000000 | 2.66282e-16 | 1.000000 |
| rad58          | 7.49480e-17 | 1.000000 | 7.49480e-17 | 1.000000 |
| rad51          | 6.45274e-17 | 1.000000 | 6.45274e-17 | 1.000000 |
| rad34          | 2.87766e-17 | 1.000000 | 2.87766e-17 | 1.000000 |
| Phenyl+cycC3H4 | 2.77347e-17 | 1.000000 | 0.000000    | 1.000000 |
| rad28          | 5.43927e-18 | 1.000000 | 5.43927e-18 | 1.000000 |
| rad2           | 4.39285e-18 | 1.000000 | 4.39285e-18 | 1.000000 |
| rad42          | 3.03585e-18 | 1.000000 | 3.03585e-18 | 1.000000 |
| rad41          | 2.75984e-18 | 1.000000 | 2.75984e-18 | 1.000000 |
| rad65          | 1.26789e-18 | 1.000000 | 1.26789e-18 | 1.000000 |
| rad26          | 7.50290e-19 | 1.000000 | 7.50290e-19 | 1.000000 |
| rad7           | 5.34893e-19 | 1.000000 | 5.34893e-19 | 1.000000 |
| rad1           | 2.77482e-19 | 1.000000 | 2.77482e-19 | 1.000000 |
| rad10          | 2.40843e-19 | 1.000000 | 2.40843e-19 | 1.000000 |
| rad11          | 1.36002e-19 | 1.000000 | 1.36002e-19 | 1.000000 |
| rad3           | 2.91280e-20 | 1.000000 | 2.91280e-20 | 1.000000 |
| rad4           | 1.47118e-20 | 1.000000 | 1.47118e-20 | 1.000000 |
| rad13          | 2.45401e-21 | 1.000000 | 2.45401e-21 | 1.000000 |
| rad33          | 4.59219e-24 | 1.000000 | 4.59219e-24 | 1.000000 |
| rad23          | 3.86232e-24 | 1.000000 | 3.86232e-24 | 1.000000 |
| rad14          | 2.73545e-24 | 1.000000 | 2.73545e-24 | 1.000000 |
| rad9           | 2.72422e-24 | 1.000000 | 2.72422e-24 | 1.000000 |
| rad27          | 2.45124e-24 | 1.000000 | 2.45124e-24 | 1.000000 |
| rad25          | 1.65169e-24 | 1.000000 | 1.65169e-24 | 1.000000 |
| rad45          | 4.33889e-26 | 1.000000 | 4.33889e-26 | 1.000000 |
| PhcycC3H3_B+H  | 2.48703e-26 | 1.000000 | 2.48703e-26 | 1.000000 |
| rad36          | 2.66119e-27 | 1.000000 | 2.66119e-27 | 1.000000 |
| rad22          | 1.81262e-27 | 1.000000 | 1.81262e-27 | 1.000000 |
| rad15          | 1.20138e-27 | 1.000000 | 1.20138e-27 | 1.000000 |
| rad53          | 1.18336e-27 | 1.000000 | 1.18336e-27 | 1.000000 |
| rad47          | 5.43528e-28 | 1.000000 | 5.43528e-28 | 1.000000 |
| rad31          | 7.88376e-29 | 1.000000 | 7.88376e-29 | 1.000000 |
| rad20          | 1.16603e-29 | 1.000000 | 1.16603e-29 | 1.000000 |
| rad21          | 8.52526e-30 | 1.000000 | 8.52526e-30 | 1.000000 |

|                               |             |         |             |         |
|-------------------------------|-------------|---------|-------------|---------|
| rad5                          | 6.45693e-30 | 1.00000 | 6.45693e-30 | 1.00000 |
| rad64                         | 5.31987e-30 | 1.00000 | 5.31987e-30 | 1.00000 |
| rad18                         | 1.25650e-31 | 1.00000 | 1.25650e-31 | 1.00000 |
| rad19anti                     | 1.95894e-32 | 1.00000 | 1.95894e-32 | 1.00000 |
| rad12                         | 1.27851e-32 | 1.00000 | 1.27851e-32 | 1.00000 |
| rad24                         | 5.44819e-34 | 1.00000 | 5.44819e-34 | 1.00000 |
| rad61                         | 5.14992e-37 | 1.00000 | 5.14992e-37 | 1.00000 |
| rad56                         | 3.96499e-39 | 1.00000 | 3.96499e-39 | 1.00000 |
| rad68syn                      | 3.00707e-41 | 1.00000 | 3.00707e-41 | 1.00000 |
| rad68anti                     | 2.57285e-41 | 1.00000 | 2.57285e-41 | 1.00000 |
| rad19syn                      | 1.37416e-42 | 1.00000 | 1.37416e-42 | 1.00000 |
| Benzene+cycloprop-2-enylidene | 3.08591e-46 | 1.00000 | 3.08591e-46 | 1.00000 |
| rad73                         | 2.47738e-49 | 1.00000 | 2.47738e-49 | 1.00000 |
| rad40syn                      | 3.10636e-50 | 1.00000 | 3.10636e-50 | 1.00000 |
| rad40anti                     | 2.55698e-50 | 1.00000 | 2.55698e-50 | 1.00000 |
| PAH8+H                        | 1.21081e-54 | 1.00000 | 1.21081e-54 | 1.00000 |
| rad71                         | 4.20515e-58 | 1.00000 | 4.20515e-58 | 1.00000 |
| rad8                          | 2.41530e-62 | 1.00000 | 2.41530e-62 | 1.00000 |
| Benzene+cycloprop-1-enylidene | 5.02895e-84 | 1.00000 | 5.02895e-84 | 1.00000 |

0.100000000E-02 Pa, 30.0000000 K

| Rate constant             | True (fraction)        | Effective (fraction)   |
|---------------------------|------------------------|------------------------|
| Total                     | 8.13009e-20 (1.00 )    | 8.13009e-20 (1.00 )    |
| Formation of rad19        | 8.13009e-20 (1.00 )    | 8.13009e-20 (1.00 )    |
| H-abstraction to cyc2enyl | 1.08880e-49 (1.34e-30) | 1.08880e-49 (1.34e-30) |
| H-abstraction to cyclenyl | 7.55172e-75 (9.29e-56) | 7.55172e-75 (9.29e-56) |

| species        | PYtrue      | Cumul    | PYeffective | Cumul    |
|----------------|-------------|----------|-------------|----------|
| Indene+H       | 0.999770    | 0.999770 | 0.999770    | 0.999770 |
| PhCHCCH2+H     | 0.000218731 | 0.999989 | 0.000218731 | 0.999989 |
| PhCCH+CH3      | 3.77865e-06 | 0.999993 | 3.77865e-06 | 0.999993 |
| C2H2+PhCH2     | 2.68422e-06 | 0.999995 | 2.68422e-06 | 0.999995 |
| PhCCCH3+H      | 2.12534e-06 | 0.999997 | 2.12534e-06 | 0.999997 |
| Ph+MeAc        | 1.57133e-06 | 0.999999 | 1.57133e-06 | 0.999999 |
| rad67          | 4.76635e-07 | 0.999999 | 4.76635e-07 | 0.999999 |
| rad35          | 2.11020e-07 | 1.000000 | 2.11020e-07 | 1.000000 |
| Ph+Allene      | 1.36262e-07 | 1.000000 | 1.36262e-07 | 1.000000 |
| PAH7+H         | 1.80222e-08 | 1.000000 | 1.80222e-08 | 1.000000 |
| PhCH2CCH+H     | 1.65870e-08 | 1.000000 | 1.65870e-08 | 1.000000 |
| rad39          | 5.08244e-09 | 1.000000 | 5.08244e-09 | 1.000000 |
| rad37          | 4.68442e-09 | 1.000000 | 4.68442e-09 | 1.000000 |
| rad30          | 3.94492e-09 | 1.000000 | 3.94492e-09 | 1.000000 |
| PAH9+H         | 2.56840e-10 | 1.000000 | 2.56840e-10 | 1.000000 |
| rad38          | 1.08276e-10 | 1.000000 | 1.08276e-10 | 1.000000 |
| rad60syn       | 1.71554e-11 | 1.000000 | 1.71554e-11 | 1.000000 |
| rad60anti      | 8.37741e-12 | 1.000000 | 8.37741e-12 | 1.000000 |
| PAH3+H         | 6.84133e-12 | 1.000000 | 6.84133e-12 | 1.000000 |
| rad46          | 6.51046e-12 | 1.000000 | 6.51046e-12 | 1.000000 |
| PAH10+CH3      | 5.66954e-12 | 1.000000 | 5.66954e-12 | 1.000000 |
| rad59          | 1.41858e-12 | 1.000000 | 1.41858e-12 | 1.000000 |
| PhcycC3H3_A+H  | 4.42384e-13 | 1.000000 | 4.42384e-13 | 1.000000 |
| rad43          | 2.64643e-13 | 1.000000 | 2.64643e-13 | 1.000000 |
| rad54          | 2.10145e-13 | 1.000000 | 2.10145e-13 | 1.000000 |
| rad62          | 5.66915e-14 | 1.000000 | 5.66915e-14 | 1.000000 |
| rad50          | 4.31270e-14 | 1.000000 | 4.31270e-14 | 1.000000 |
| rad70          | 3.23375e-15 | 1.000000 | 3.23375e-15 | 1.000000 |
| rad55          | 1.41771e-15 | 1.000000 | 1.41771e-15 | 1.000000 |
| PAH1+H         | 5.82533e-16 | 1.000000 | 5.82533e-16 | 1.000000 |
| rad52          | 2.74043e-16 | 1.000000 | 2.74043e-16 | 1.000000 |
| rad6           | 1.57356e-16 | 1.000000 | 1.57356e-16 | 1.000000 |
| rad58          | 7.77546e-17 | 1.000000 | 7.77546e-17 | 1.000000 |
| rad51          | 6.68430e-17 | 1.000000 | 6.68430e-17 | 1.000000 |
| Phenyl+cycC3H4 | 5.25631e-17 | 1.000000 | 0.000000    | 1.000000 |
| rad34          | 3.04033e-17 | 1.000000 | 3.04033e-17 | 1.000000 |
| rad42          | 3.20214e-18 | 1.000000 | 3.20214e-18 | 1.000000 |
| rad41          | 2.95967e-18 | 1.000000 | 2.95967e-18 | 1.000000 |
| rad65          | 1.31777e-18 | 1.000000 | 1.31777e-18 | 1.000000 |
| rad28          | 1.38000e-19 | 1.000000 | 1.38000e-19 | 1.000000 |
| rad2           | 1.03092e-19 | 1.000000 | 1.03092e-19 | 1.000000 |
| rad26          | 1.84849e-20 | 1.000000 | 1.84849e-20 | 1.000000 |
| rad7           | 1.29945e-20 | 1.000000 | 1.29945e-20 | 1.000000 |
| rad1           | 6.51545e-21 | 1.000000 | 6.51545e-21 | 1.000000 |
| rad10          | 5.51627e-21 | 1.000000 | 5.51627e-21 | 1.000000 |
| rad11          | 3.26444e-21 | 1.000000 | 3.26444e-21 | 1.000000 |
| rad3           | 6.69390e-22 | 1.000000 | 6.69390e-22 | 1.000000 |
| rad4           | 3.38127e-22 | 1.000000 | 3.38127e-22 | 1.000000 |
| rad13          | 6.28408e-23 | 1.000000 | 6.28408e-23 | 1.000000 |

|                               |             |          |             |          |
|-------------------------------|-------------|----------|-------------|----------|
| rad33                         | 1.17822e-25 | 1.000000 | 1.17822e-25 | 1.000000 |
| rad9                          | 9.83563e-26 | 1.000000 | 9.83563e-26 | 1.000000 |
| rad14                         | 6.68045e-26 | 1.000000 | 6.68045e-26 | 1.000000 |
| rad27                         | 5.78618e-26 | 1.000000 | 5.78618e-26 | 1.000000 |
| rad25                         | 4.23668e-26 | 1.000000 | 4.23668e-26 | 1.000000 |
| PhcycC3H3_B+H                 | 1.87751e-26 | 1.000000 | 1.87751e-26 | 1.000000 |
| rad23                         | 1.40740e-26 | 1.000000 | 1.40740e-26 | 1.000000 |
| rad53                         | 8.52992e-28 | 1.000000 | 8.52992e-28 | 1.000000 |
| rad47                         | 2.67971e-28 | 1.000000 | 2.67971e-28 | 1.000000 |
| rad45                         | 1.44730e-28 | 1.000000 | 1.44730e-28 | 1.000000 |
| rad15                         | 4.28399e-29 | 1.000000 | 4.28399e-29 | 1.000000 |
| rad36                         | 8.87521e-30 | 1.000000 | 8.87521e-30 | 1.000000 |
| rad22                         | 6.32814e-30 | 1.000000 | 6.32814e-30 | 1.000000 |
| rad64                         | 3.81181e-30 | 1.000000 | 3.81181e-30 | 1.000000 |
| rad31                         | 1.85359e-30 | 1.000000 | 1.85359e-30 | 1.000000 |
| Benzene+cycloprop-2-enylidene | 1.33923e-30 | 1.000000 | 1.33923e-30 | 1.000000 |
| rad5                          | 8.36757e-31 | 1.000000 | 8.36757e-31 | 1.000000 |
| rad20                         | 2.92354e-31 | 1.000000 | 2.92354e-31 | 1.000000 |
| rad21                         | 2.14505e-31 | 1.000000 | 2.14505e-31 | 1.000000 |
| rad19anti                     | 9.55737e-33 | 1.000000 | 9.55737e-33 | 1.000000 |
| rad18                         | 2.14652e-33 | 1.000000 | 2.14652e-33 | 1.000000 |
| rad12                         | 4.62091e-34 | 1.000000 | 4.62091e-34 | 1.000000 |
| rad24                         | 1.99719e-36 | 1.000000 | 1.99719e-36 | 1.000000 |
| rad61                         | 4.03804e-37 | 1.000000 | 4.03804e-37 | 1.000000 |
| rad56                         | 2.83564e-39 | 1.000000 | 2.83564e-39 | 1.000000 |
| rad68syn                      | 2.16145e-41 | 1.000000 | 2.16145e-41 | 1.000000 |
| rad68anti                     | 1.84911e-41 | 1.000000 | 1.84911e-41 | 1.000000 |
| rad19syn                      | 8.38610e-43 | 1.000000 | 8.38610e-43 | 1.000000 |
| rad73                         | 1.81981e-49 | 1.000000 | 1.81981e-49 | 1.000000 |
| rad40syn                      | 2.63748e-50 | 1.000000 | 2.63748e-50 | 1.000000 |
| rad40anti                     | 2.17214e-50 | 1.000000 | 2.17214e-50 | 1.000000 |
| PAH8+H                        | 1.04058e-54 | 1.000000 | 1.04058e-54 | 1.000000 |
| Benzene+cycloprop-1-enylidene | 9.28861e-56 | 1.000000 | 9.28861e-56 | 1.000000 |
| rad71                         | 3.23483e-58 | 1.000000 | 3.23483e-58 | 1.000000 |
| rad8                          | 1.27010e-62 | 1.000000 | 1.27010e-62 | 1.000000 |

0.100000000E-02 Pa, 40.0000000 K

=====

| Rate constant             | True (fraction)        | Effective (fraction)   |
|---------------------------|------------------------|------------------------|
| Total                     | 2.24819e-18 (1.00 )    | 2.24819e-18 (1.00 )    |
| Formation of rad19        | 2.24819e-18 (1.00 )    | 2.24819e-18 (1.00 )    |
| H-abstraction to cyc2enyl | 1.72361e-40 (7.67e-23) | 1.72361e-40 (7.67e-23) |
| H-abstraction to cyclenyl | 2.48792e-59 (1.11e-41) | 2.48792e-59 (1.11e-41) |

| species        | PYtrue      | Cumul    | PYeffective | Cumul    |
|----------------|-------------|----------|-------------|----------|
| Indene+H       | 0.999767    | 0.999767 | 0.999767    | 0.999767 |
| PhCHCCH2+H     | 0.000221741 | 0.999989 | 0.000221741 | 0.999989 |
| PhCCH+CH3      | 3.83566e-06 | 0.999993 | 3.83566e-06 | 0.999993 |
| C2H2+PhCH2     | 2.73258e-06 | 0.999995 | 2.73258e-06 | 0.999995 |
| PhCCCH3+H      | 2.16031e-06 | 0.999997 | 2.16031e-06 | 0.999997 |
| Ph+MeAc        | 1.60287e-06 | 0.999999 | 1.60287e-06 | 0.999999 |
| rad67          | 4.85680e-07 | 1.000000 | 4.85680e-07 | 1.000000 |
| rad35          | 2.14860e-07 | 1.000000 | 2.14860e-07 | 1.000000 |
| Ph+Allene      | 1.39977e-07 | 1.000000 | 1.39977e-07 | 1.000000 |
| PAH7+H         | 1.84439e-08 | 1.000000 | 1.84439e-08 | 1.000000 |
| PhCH2CCH+H     | 1.71120e-08 | 1.000000 | 1.71120e-08 | 1.000000 |
| rad39          | 5.20178e-09 | 1.000000 | 5.20178e-09 | 1.000000 |
| rad37          | 4.79848e-09 | 1.000000 | 4.79848e-09 | 1.000000 |
| rad30          | 4.01821e-09 | 1.000000 | 4.01821e-09 | 1.000000 |
| PAH9+H         | 2.63074e-10 | 1.000000 | 2.63074e-10 | 1.000000 |
| rad38          | 1.11142e-10 | 1.000000 | 1.11142e-10 | 1.000000 |
| rad60syn       | 1.76003e-11 | 1.000000 | 1.76003e-11 | 1.000000 |
| rad60anti      | 8.60018e-12 | 1.000000 | 8.60018e-12 | 1.000000 |
| PAH3+H         | 7.08150e-12 | 1.000000 | 7.08150e-12 | 1.000000 |
| rad46          | 6.69684e-12 | 1.000000 | 6.69684e-12 | 1.000000 |
| PAH10+CH3      | 5.95289e-12 | 1.000000 | 5.95289e-12 | 1.000000 |
| rad59          | 1.46645e-12 | 1.000000 | 1.46645e-12 | 1.000000 |
| PhcycC3H3_A+H  | 5.01367e-13 | 1.000000 | 5.01367e-13 | 1.000000 |
| rad43          | 2.76411e-13 | 1.000000 | 2.76411e-13 | 1.000000 |
| rad54          | 2.20766e-13 | 1.000000 | 2.20766e-13 | 1.000000 |
| rad62          | 5.93226e-14 | 1.000000 | 5.93226e-14 | 1.000000 |
| rad50          | 4.49257e-14 | 1.000000 | 4.49257e-14 | 1.000000 |
| rad70          | 3.44791e-15 | 1.000000 | 3.44791e-15 | 1.000000 |
| rad55          | 1.51377e-15 | 1.000000 | 1.51377e-15 | 1.000000 |
| PAH1+H         | 6.36768e-16 | 1.000000 | 6.36768e-16 | 1.000000 |
| rad52          | 2.88212e-16 | 1.000000 | 2.88212e-16 | 1.000000 |
| Phenyl+cycC3H4 | 1.15738e-16 | 1.000000 | 0.00000     | 1.000000 |
| rad58          | 8.33388e-17 | 1.000000 | 8.33388e-17 | 1.000000 |

|                               |             |          |             |          |
|-------------------------------|-------------|----------|-------------|----------|
| rad51                         | 7.11183e-17 | 1.000000 | 7.11183e-17 | 1.000000 |
| rad34                         | 3.33987e-17 | 1.000000 | 3.33987e-17 | 1.000000 |
| rad6                          | 2.09618e-17 | 1.000000 | 2.09618e-17 | 1.000000 |
| rad42                         | 3.54991e-18 | 1.000000 | 3.54991e-18 | 1.000000 |
| rad41                         | 3.38557e-18 | 1.000000 | 3.38557e-18 | 1.000000 |
| rad65                         | 1.41042e-18 | 1.000000 | 1.41042e-18 | 1.000000 |
| rad28                         | 1.84059e-20 | 1.000000 | 1.84059e-20 | 1.000000 |
| rad2                          | 1.30875e-20 | 1.000000 | 1.30875e-20 | 1.000000 |
| rad26                         | 2.41778e-21 | 1.000000 | 2.41778e-21 | 1.000000 |
| rad7                          | 1.68687e-21 | 1.000000 | 1.68687e-21 | 1.000000 |
| rad1                          | 8.28060e-22 | 1.000000 | 8.28060e-22 | 1.000000 |
| rad10                         | 6.92039e-22 | 1.000000 | 6.92039e-22 | 1.000000 |
| rad11                         | 4.21775e-22 | 1.000000 | 4.21775e-22 | 1.000000 |
| rad3                          | 8.42199e-23 | 1.000000 | 8.42199e-23 | 1.000000 |
| Benzene+cycloprop-2-enylidene | 7.66665e-23 | 1.000000 | 7.66665e-23 | 1.000000 |
| rad4                          | 4.25516e-23 | 1.000000 | 4.25516e-23 | 1.000000 |
| rad13                         | 8.37426e-24 | 1.000000 | 8.37426e-24 | 1.000000 |
| PhcycC3H3_B+H                 | 8.59744e-25 | 1.000000 | 8.59744e-25 | 1.000000 |
| rad9                          | 1.73417e-26 | 1.000000 | 1.73417e-26 | 1.000000 |
| rad33                         | 1.57161e-26 | 1.000000 | 1.57161e-26 | 1.000000 |
| rad14                         | 8.73001e-27 | 1.000000 | 8.73001e-27 | 1.000000 |
| rad27                         | 7.39372e-27 | 1.000000 | 7.39372e-27 | 1.000000 |
| rad25                         | 5.65655e-27 | 1.000000 | 5.65655e-27 | 1.000000 |
| rad53                         | 1.27643e-27 | 1.000000 | 1.27643e-27 | 1.000000 |
| rad23                         | 6.30265e-28 | 1.000000 | 6.30265e-28 | 1.000000 |
| rad47                         | 1.80567e-28 | 1.000000 | 1.80567e-28 | 1.000000 |
| rad15                         | 7.52782e-30 | 1.000000 | 7.52782e-30 | 1.000000 |
| rad45                         | 6.19103e-30 | 1.000000 | 6.19103e-30 | 1.000000 |
| rad64                         | 5.66702e-30 | 1.000000 | 5.66702e-30 | 1.000000 |
| rad36                         | 3.79522e-31 | 1.000000 | 3.79522e-31 | 1.000000 |
| rad22                         | 2.85654e-31 | 1.000000 | 2.85654e-31 | 1.000000 |
| rad5                          | 2.76761e-31 | 1.000000 | 2.76761e-31 | 1.000000 |
| rad31                         | 2.36892e-31 | 1.000000 | 2.36892e-31 | 1.000000 |
| rad20                         | 3.93781e-32 | 1.000000 | 3.93781e-32 | 1.000000 |
| rad21                         | 2.89428e-32 | 1.000000 | 2.89428e-32 | 1.000000 |
| rad19anti                     | 7.61547e-33 | 1.000000 | 7.61547e-33 | 1.000000 |
| rad18                         | 2.47353e-34 | 1.000000 | 2.47353e-34 | 1.000000 |
| rad12                         | 8.16587e-35 | 1.000000 | 8.16587e-35 | 1.000000 |
| rad61                         | 6.84423e-37 | 1.000000 | 6.84423e-37 | 1.000000 |
| rad24                         | 9.07218e-38 | 1.000000 | 9.07218e-38 | 1.000000 |
| rad56                         | 4.50383e-39 | 1.000000 | 4.50383e-39 | 1.000000 |
| rad68syn                      | 3.49003e-41 | 1.000000 | 3.49003e-41 | 1.000000 |
| rad68anti                     | 2.98417e-41 | 1.000000 | 2.98417e-41 | 1.000000 |
| Benzene+cycloprop-1-enylidene | 1.10663e-41 | 1.000000 | 1.10663e-41 | 1.000000 |
| rad19syn                      | 8.61360e-43 | 1.000000 | 8.61360e-43 | 1.000000 |
| rad73                         | 3.11591e-49 | 1.000000 | 3.11591e-49 | 1.000000 |
| rad40syn                      | 5.49105e-50 | 1.000000 | 5.49105e-50 | 1.000000 |
| rad40anti                     | 4.52148e-50 | 1.000000 | 4.52148e-50 | 1.000000 |
| PAH8+H                        | 2.27645e-54 | 1.000000 | 2.27645e-54 | 1.000000 |
| rad71                         | 6.18540e-58 | 1.000000 | 6.18540e-58 | 1.000000 |
| rad8                          | 9.77103e-63 | 1.000000 | 9.77103e-63 | 1.000000 |

0.100000000E-02 Pa, 50.0000000 K

=====

| Rate constant             | True (fraction)        | Effective (fraction)   |
|---------------------------|------------------------|------------------------|
| Total                     | 1.72707e-17 (1.00 )    | 1.72707e-17 (1.00 )    |
| Formation of rad19        | 1.72707e-17 (1.00 )    | 1.72707e-17 (1.00 )    |
| H-abstraction to cyc2enyl | 5.49905e-35 (3.18e-18) | 5.49905e-35 (3.18e-18) |
| H-abstraction to cyclenyl | 4.93090e-50 (2.86e-33) | 4.93090e-50 (2.86e-33) |

| species    | PYtrue      | Cumul    | PYeffective | Cumul    |
|------------|-------------|----------|-------------|----------|
| Indene+H   | 0.999763    | 0.999763 | 0.999763    | 0.999763 |
| PhCHCCH2+H | 0.000225653 | 0.999989 | 0.000225653 | 0.999989 |
| PhCCH+CH3  | 3.90964e-06 | 0.999993 | 3.90964e-06 | 0.999993 |
| C2H2+PhCH2 | 2.79542e-06 | 0.999995 | 2.79542e-06 | 0.999995 |
| PhCCCH3+H  | 2.20587e-06 | 0.999998 | 2.20587e-06 | 0.999998 |
| Ph+MeAc    | 1.64408e-06 | 0.999999 | 1.64408e-06 | 0.999999 |
| rad67      | 4.97501e-07 | 1.000000 | 4.97501e-07 | 1.000000 |
| rad35      | 2.19873e-07 | 1.000000 | 2.19873e-07 | 1.000000 |
| Ph+Allene  | 1.44817e-07 | 1.000000 | 1.44817e-07 | 1.000000 |
| PAH7+H     | 1.89908e-08 | 1.000000 | 1.89908e-08 | 1.000000 |
| PhCH2CCH+H | 1.77990e-08 | 1.000000 | 1.77990e-08 | 1.000000 |
| rad39      | 5.35657e-09 | 1.000000 | 5.35657e-09 | 1.000000 |
| rad37      | 4.94837e-09 | 1.000000 | 4.94837e-09 | 1.000000 |
| rad30      | 4.11394e-09 | 1.000000 | 4.11394e-09 | 1.000000 |
| PAH9+H     | 2.71211e-10 | 1.000000 | 2.71211e-10 | 1.000000 |
| rad38      | 1.14897e-10 | 1.000000 | 1.14897e-10 | 1.000000 |
| rad60syn   | 1.81862e-11 | 1.000000 | 1.81862e-11 | 1.000000 |



|                               |             |         |             |         |
|-------------------------------|-------------|---------|-------------|---------|
| rad60anti                     | 8.89374e-12 | 1.00000 | 8.89374e-12 | 1.00000 |
| PAH3+H                        | 7.40101e-12 | 1.00000 | 7.40101e-12 | 1.00000 |
| rad46                         | 6.94097e-12 | 1.00000 | 6.94097e-12 | 1.00000 |
| PAH10+CH3                     | 6.33573e-12 | 1.00000 | 6.33573e-12 | 1.00000 |
| rad59                         | 1.53004e-12 | 1.00000 | 1.53004e-12 | 1.00000 |
| PhcycC3H3_A+H                 | 5.85915e-13 | 1.00000 | 5.85915e-13 | 1.00000 |
| rad43                         | 2.92198e-13 | 1.00000 | 2.92198e-13 | 1.00000 |
| rad54                         | 2.34899e-13 | 1.00000 | 2.34899e-13 | 1.00000 |
| rad62                         | 6.28466e-14 | 1.00000 | 6.28466e-14 | 1.00000 |
| rad50                         | 4.73134e-14 | 1.00000 | 4.73134e-14 | 1.00000 |
| rad70                         | 3.73853e-15 | 1.00000 | 3.73853e-15 | 1.00000 |
| rad55                         | 1.64356e-15 | 1.00000 | 1.64356e-15 | 1.00000 |
| PAH1+H                        | 7.12643e-16 | 1.00000 | 7.12643e-16 | 1.00000 |
| rad52                         | 3.07223e-16 | 1.00000 | 3.07223e-16 | 1.00000 |
| Phenyl+cycC3H4                | 2.36668e-16 | 1.00000 | 0.00000     | 1.00000 |
| rad58                         | 9.10482e-17 | 1.00000 | 9.10482e-17 | 1.00000 |
| rad51                         | 7.69324e-17 | 1.00000 | 7.69324e-17 | 1.00000 |
| rad34                         | 3.75169e-17 | 1.00000 | 3.75169e-17 | 1.00000 |
| rad6                          | 5.23562e-18 | 1.00000 | 5.23562e-18 | 1.00000 |
| rad42                         | 4.07015e-18 | 1.00000 | 4.07015e-18 | 1.00000 |
| rad41                         | 4.02244e-18 | 1.00000 | 4.02244e-18 | 1.00000 |
| Benzene+cycloprop-2-enylidene | 3.18404e-18 | 1.00000 | 3.18404e-18 | 1.00000 |
| rad65                         | 1.53722e-18 | 1.00000 | 1.53722e-18 | 1.00000 |
| rad28                         | 4.61767e-21 | 1.00000 | 4.61767e-21 | 1.00000 |
| rad2                          | 3.16484e-21 | 1.00000 | 3.16484e-21 | 1.00000 |
| rad26                         | 5.98128e-22 | 1.00000 | 5.98128e-22 | 1.00000 |
| rad7                          | 4.14732e-22 | 1.00000 | 4.14732e-22 | 1.00000 |
| PhcycC3H3_B+H                 | 2.98351e-22 | 1.00000 | 2.98351e-22 | 1.00000 |
| rad1                          | 2.00568e-22 | 1.00000 | 2.00568e-22 | 1.00000 |
| rad10                         | 1.66131e-22 | 1.00000 | 1.66131e-22 | 1.00000 |
| rad11                         | 1.03441e-22 | 1.00000 | 1.03441e-22 | 1.00000 |
| rad3                          | 2.02626e-23 | 1.00000 | 2.02626e-23 | 1.00000 |
| rad4                          | 1.02410e-23 | 1.00000 | 1.02410e-23 | 1.00000 |
| rad13                         | 2.09394e-24 | 1.00000 | 2.09394e-24 | 1.00000 |
| rad53                         | 1.10604e-26 | 1.00000 | 1.10604e-26 | 1.00000 |
| rad9                          | 5.62657e-27 | 1.00000 | 5.62657e-27 | 1.00000 |
| rad33                         | 3.93300e-27 | 1.00000 | 3.93300e-27 | 1.00000 |
| rad14                         | 2.16039e-27 | 1.00000 | 2.16039e-27 | 1.00000 |
| rad27                         | 1.79961e-27 | 1.00000 | 1.79961e-27 | 1.00000 |
| rad25                         | 1.41714e-27 | 1.00000 | 1.41714e-27 | 1.00000 |
| rad47                         | 1.37896e-28 | 1.00000 | 1.37896e-28 | 1.00000 |
| rad23                         | 7.52734e-29 | 1.00000 | 7.52734e-29 | 1.00000 |
| rad64                         | 1.95935e-29 | 1.00000 | 1.95935e-29 | 1.00000 |
| rad15                         | 2.44006e-30 | 1.00000 | 2.44006e-30 | 1.00000 |
| rad45                         | 7.17541e-31 | 1.00000 | 7.17541e-31 | 1.00000 |
| rad5                          | 1.30040e-31 | 1.00000 | 1.30040e-31 | 1.00000 |
| rad31                         | 5.78847e-32 | 1.00000 | 5.78847e-32 | 1.00000 |
| rad36                         | 4.39683e-32 | 1.00000 | 4.39683e-32 | 1.00000 |
| rad22                         | 3.50353e-32 | 1.00000 | 3.50353e-32 | 1.00000 |
| rad20                         | 1.00910e-32 | 1.00000 | 1.00910e-32 | 1.00000 |
| rad19anti                     | 7.59013e-33 | 1.00000 | 7.59013e-33 | 1.00000 |
| rad21                         | 7.42812e-33 | 1.00000 | 7.42812e-33 | 1.00000 |
| Benzene+cycloprop-1-enylidene | 2.85507e-33 | 1.00000 | 2.85507e-33 | 1.00000 |
| rad18                         | 5.82108e-35 | 1.00000 | 5.82108e-35 | 1.00000 |
| rad12                         | 2.65811e-35 | 1.00000 | 2.65811e-35 | 1.00000 |
| rad61                         | 1.95884e-36 | 1.00000 | 1.95884e-36 | 1.00000 |
| rad56                         | 1.22418e-38 | 1.00000 | 1.22418e-38 | 1.00000 |
| rad24                         | 1.10660e-38 | 1.00000 | 1.10660e-38 | 1.00000 |
| rad68syn                      | 9.71912e-41 | 1.00000 | 9.71912e-41 | 1.00000 |
| rad68anti                     | 8.30395e-41 | 1.00000 | 8.30395e-41 | 1.00000 |
| rad19syn                      | 1.15714e-42 | 1.00000 | 1.15714e-42 | 1.00000 |
| rad73                         | 9.47783e-49 | 1.00000 | 9.47783e-49 | 1.00000 |
| rad40syn                      | 2.13195e-49 | 1.00000 | 2.13195e-49 | 1.00000 |
| rad40anti                     | 1.75420e-49 | 1.00000 | 1.75420e-49 | 1.00000 |
| PAH8+H                        | 9.60348e-54 | 1.00000 | 9.60348e-54 | 1.00000 |
| rad71                         | 2.23031e-57 | 1.00000 | 2.23031e-57 | 1.00000 |
| rad8                          | 9.05773e-63 | 1.00000 | 9.05773e-63 | 1.00000 |

0.100000000E-02 Pa, 60.000000 K

| Rate constant             | True (fraction)        | Effective (fraction)   |             |          |
|---------------------------|------------------------|------------------------|-------------|----------|
| Total                     | 6.93738e-17 (1.00 )    | 6.93738e-17 (1.00 )    |             |          |
| Formation of rad19        | 6.93738e-17 (1.000 )   | 6.93738e-17 (1.000 )   |             |          |
| H-abstraction to cyc2enyl | 2.50609e-31 (3.61e-15) | 2.50609e-31 (3.61e-15) |             |          |
| H-abstraction to cyclenyl | 7.62015e-44 (1.10e-27) | 7.62015e-44 (1.10e-27) |             |          |
| species                   | PYtrue                 | Cumul                  | PYeffective | Cumul    |
| Indene+H                  | 0.999758               | 0.999758               | 0.999758    | 0.999758 |

|                               |             |          |             |          |
|-------------------------------|-------------|----------|-------------|----------|
| PhCHCCH2+H                    | 0.000230117 | 0.999988 | 0.000230117 | 0.999988 |
| PhCCH+CH3                     | 3.99403e-06 | 0.999992 | 3.99403e-06 | 0.999992 |
| C2H2+PhCH2                    | 2.86746e-06 | 0.999995 | 2.86746e-06 | 0.999995 |
| PhCCCH3+H                     | 2.25802e-06 | 0.999997 | 2.25802e-06 | 0.999997 |
| Ph+MeAc                       | 1.69150e-06 | 0.999999 | 1.69150e-06 | 0.999999 |
| rad67                         | 5.11087e-07 | 0.999999 | 5.11087e-07 | 0.999999 |
| rad35                         | 2.25629e-07 | 1.000000 | 2.25629e-07 | 1.000000 |
| Ph+Allene                     | 1.50427e-07 | 1.000000 | 1.50427e-07 | 1.000000 |
| PAH7+H                        | 1.96212e-08 | 1.000000 | 1.96212e-08 | 1.000000 |
| PhCH2CCH+H                    | 1.86000e-08 | 1.000000 | 1.86000e-08 | 1.000000 |
| rad39                         | 5.53491e-09 | 1.000000 | 5.53491e-09 | 1.000000 |
| rad37                         | 5.12200e-09 | 1.000000 | 5.12200e-09 | 1.000000 |
| rad30                         | 4.22398e-09 | 1.000000 | 4.22398e-09 | 1.000000 |
| PAH9+H                        | 2.80622e-10 | 1.000000 | 2.80622e-10 | 1.000000 |
| rad38                         | 1.19259e-10 | 1.000000 | 1.19259e-10 | 1.000000 |
| rad60syn                      | 1.88670e-11 | 1.000000 | 1.88670e-11 | 1.000000 |
| rad60anti                     | 9.23515e-12 | 1.000000 | 9.23515e-12 | 1.000000 |
| PAH3+H                        | 7.77720e-12 | 1.000000 | 7.77720e-12 | 1.000000 |
| rad46                         | 7.22504e-12 | 1.000000 | 7.22504e-12 | 1.000000 |
| PAH10+CH3                     | 6.79534e-12 | 1.000000 | 6.79534e-12 | 1.000000 |
| rad59                         | 1.60476e-12 | 1.000000 | 1.60476e-12 | 1.000000 |
| PhcycC3H3_A+H                 | 6.95696e-13 | 1.000000 | 6.95696e-13 | 1.000000 |
| rad43                         | 3.10982e-13 | 1.000000 | 3.10982e-13 | 1.000000 |
| rad54                         | 2.51783e-13 | 1.000000 | 2.51783e-13 | 1.000000 |
| rad62                         | 6.70429e-14 | 1.000000 | 6.70429e-14 | 1.000000 |
| rad50                         | 5.01433e-14 | 1.000000 | 5.01433e-14 | 1.000000 |
| rad70                         | 4.09342e-15 | 1.000000 | 4.09342e-15 | 1.000000 |
| Benzene+cycloprop-2-enylidene | 3.61245e-15 | 1.000000 | 3.61245e-15 | 1.000000 |
| rad55                         | 1.80161e-15 | 1.000000 | 1.80161e-15 | 1.000000 |
| PAH1+H                        | 8.08338e-16 | 1.000000 | 8.08338e-16 | 1.000000 |
| Phenyl+cycC3H4                | 4.45921e-16 | 1.000000 | 0.000000    | 1.000000 |
| rad52                         | 3.30065e-16 | 1.000000 | 3.30065e-16 | 1.000000 |
| rad58                         | 1.00568e-16 | 1.000000 | 1.00568e-16 | 1.000000 |
| rad51                         | 8.40360e-17 | 1.000000 | 8.40360e-17 | 1.000000 |
| rad34                         | 4.26702e-17 | 1.000000 | 4.26702e-17 | 1.000000 |
| rad41                         | 4.86891e-18 | 1.000000 | 4.86891e-18 | 1.000000 |
| rad42                         | 4.76046e-18 | 1.000000 | 4.76046e-18 | 1.000000 |
| rad6                          | 1.82352e-18 | 1.000000 | 1.82352e-18 | 1.000000 |
| rad65                         | 1.69339e-18 | 1.000000 | 1.69339e-18 | 1.000000 |
| PhcycC3H3_B+H                 | 1.47019e-20 | 1.000000 | 1.47019e-20 | 1.000000 |
| rad28                         | 1.61727e-21 | 1.000000 | 1.61727e-21 | 1.000000 |
| rad2                          | 1.07618e-21 | 1.000000 | 1.07618e-21 | 1.000000 |
| rad26                         | 2.07306e-22 | 1.000000 | 2.07306e-22 | 1.000000 |
| rad7                          | 1.42902e-22 | 1.000000 | 1.42902e-22 | 1.000000 |
| rad1                          | 6.83389e-23 | 1.000000 | 6.83389e-23 | 1.000000 |
| rad10                         | 5.62094e-23 | 1.000000 | 5.62094e-23 | 1.000000 |
| rad11                         | 3.55895e-23 | 1.000000 | 3.55895e-23 | 1.000000 |
| rad3                          | 6.86757e-24 | 1.000000 | 6.86757e-24 | 1.000000 |
| rad4                          | 3.47249e-24 | 1.000000 | 3.47249e-24 | 1.000000 |
| rad13                         | 7.30419e-25 | 1.000000 | 7.30419e-25 | 1.000000 |
| rad53                         | 3.81911e-25 | 1.000000 | 3.81911e-25 | 1.000000 |
| rad9                          | 2.53548e-27 | 1.000000 | 2.53548e-27 | 1.000000 |
| rad33                         | 1.37309e-27 | 1.000000 | 1.37309e-27 | 1.000000 |
| Benzene+cycloprop-1-enylidene | 1.09842e-27 | 1.000000 | 1.09842e-27 | 1.000000 |
| rad64                         | 9.75018e-28 | 1.000000 | 9.75018e-28 | 1.000000 |
| rad14                         | 7.49055e-28 | 1.000000 | 7.49055e-28 | 1.000000 |
| rad27                         | 6.15838e-28 | 1.000000 | 6.15838e-28 | 1.000000 |
| rad25                         | 4.95308e-28 | 1.000000 | 4.95308e-28 | 1.000000 |
| rad47                         | 1.12920e-28 | 1.000000 | 1.12920e-28 | 1.000000 |
| rad23                         | 1.51724e-29 | 1.000000 | 1.51724e-29 | 1.000000 |
| rad15                         | 1.09960e-30 | 1.000000 | 1.09960e-30 | 1.000000 |
| rad45                         | 1.41504e-31 | 1.000000 | 1.41504e-31 | 1.000000 |
| rad5                          | 7.36192e-32 | 1.000000 | 7.36192e-32 | 1.000000 |
| rad31                         | 1.99500e-32 | 1.000000 | 1.99500e-32 | 1.000000 |
| rad19anti                     | 8.81947e-33 | 1.000000 | 8.81947e-33 | 1.000000 |
| rad36                         | 8.66738e-33 | 1.000000 | 8.66738e-33 | 1.000000 |
| rad22                         | 7.31478e-33 | 1.000000 | 7.31478e-33 | 1.000000 |
| rad20                         | 3.63811e-33 | 1.000000 | 3.63811e-33 | 1.000000 |
| rad21                         | 2.68218e-33 | 1.000000 | 2.68218e-33 | 1.000000 |
| rad61                         | 5.83707e-35 | 1.000000 | 5.83707e-35 | 1.000000 |
| rad18                         | 1.98941e-35 | 1.000000 | 1.98941e-35 | 1.000000 |
| rad12                         | 1.20265e-35 | 1.000000 | 1.20265e-35 | 1.000000 |
| rad56                         | 6.23636e-38 | 1.000000 | 6.23636e-38 | 1.000000 |
| rad24                         | 2.29487e-39 | 1.000000 | 2.29487e-39 | 1.000000 |
| rad68syn                      | 5.08547e-40 | 1.000000 | 5.08547e-40 | 1.000000 |
| rad68anti                     | 4.34104e-40 | 1.000000 | 4.34104e-40 | 1.000000 |
| rad19syn                      | 1.80508e-42 | 1.000000 | 1.80508e-42 | 1.000000 |
| rad73                         | 5.49680e-48 | 1.000000 | 5.49680e-48 | 1.000000 |
| rad40syn                      | 1.55236e-48 | 1.000000 | 1.55236e-48 | 1.000000 |
| rad40anti                     | 1.27541e-48 | 1.000000 | 1.27541e-48 | 1.000000 |

|        |             |          |             |          |
|--------|-------------|----------|-------------|----------|
| PAH8+H | 7.84604e-53 | 1.000000 | 7.84604e-53 | 1.000000 |
| rad71  | 1.59509e-56 | 1.000000 | 1.59509e-56 | 1.000000 |
| rad8   | 9.44471e-63 | 1.000000 | 9.44471e-63 | 1.000000 |

0.100000000E-02 Pa, 70.0000000 K

| Rate constant             | True (fraction)        | Effective (fraction)   |
|---------------------------|------------------------|------------------------|
| Total                     | 1.91520e-16 (1.00 )    | 1.91520e-16 (1.00 )    |
| Formation of rad19        | 1.91520e-16 (1.000 )   | 1.91520e-16 (1.000 )   |
| H-abstraction to cyc2enyl | 1.01125e-28 (5.28e-13) | 1.01125e-28 (5.28e-13) |
| H-abstraction to cyc1enyl | 1.97822e-39 (1.03e-23) | 1.97822e-39 (1.03e-23) |

| species                       | PYtrue      | Cumul    | PYeffective | Cumul    |
|-------------------------------|-------------|----------|-------------|----------|
| Indene+H                      | 0.999753    | 0.999753 | 0.999753    | 0.999753 |
| PhCHCCH2+H                    | 0.000235003 | 0.999988 | 0.000235003 | 0.999988 |
| PhCCH+CH3                     | 4.08638e-06 | 0.999992 | 4.08638e-06 | 0.999992 |
| C2H2+PhCH2                    | 2.94679e-06 | 0.999995 | 2.94679e-06 | 0.999995 |
| PhCCCH3+H                     | 2.31529e-06 | 0.999997 | 2.31529e-06 | 0.999997 |
| Ph+MeAc                       | 1.74388e-06 | 0.999999 | 1.74388e-06 | 0.999999 |
| rad67                         | 5.26080e-07 | 1.000000 | 5.26080e-07 | 1.000000 |
| rad35                         | 2.31974e-07 | 1.000000 | 2.31974e-07 | 1.000000 |
| Ph+Allene                     | 1.56692e-07 | 1.000000 | 1.56692e-07 | 1.000000 |
| PAH7+H                        | 2.03206e-08 | 1.000000 | 2.03206e-08 | 1.000000 |
| PhCH2CCH+H                    | 1.95010e-08 | 1.000000 | 1.95010e-08 | 1.000000 |
| rad39                         | 5.73278e-09 | 1.000000 | 5.73278e-09 | 1.000000 |
| rad37                         | 5.31535e-09 | 1.000000 | 5.31535e-09 | 1.000000 |
| rad30                         | 4.34545e-09 | 1.000000 | 4.34545e-09 | 1.000000 |
| PAH9+H                        | 2.91102e-10 | 1.000000 | 2.91102e-10 | 1.000000 |
| rad38                         | 1.24138e-10 | 1.000000 | 1.24138e-10 | 1.000000 |
| rad60syn                      | 1.96277e-11 | 1.000000 | 1.96277e-11 | 1.000000 |
| rad60anti                     | 9.61711e-12 | 1.000000 | 9.61711e-12 | 1.000000 |
| PAH3+H                        | 8.20404e-12 | 1.000000 | 8.20404e-12 | 1.000000 |
| rad46                         | 7.54360e-12 | 1.000000 | 7.54360e-12 | 1.000000 |
| PAH10+CH3                     | 7.32846e-12 | 1.000000 | 7.32846e-12 | 1.000000 |
| rad59                         | 1.68933e-12 | 1.000000 | 1.68933e-12 | 1.000000 |
| PhcycC3H3_A+H                 | 8.34908e-13 | 1.000000 | 8.34908e-13 | 1.000000 |
| Benzene+cycloprop-2-enylidene | 5.28015e-13 | 1.000000 | 5.28015e-13 | 1.000000 |
| rad43                         | 3.32553e-13 | 1.000000 | 3.32553e-13 | 1.000000 |
| rad54                         | 2.71320e-13 | 1.000000 | 2.71320e-13 | 1.000000 |
| rad62                         | 7.18673e-14 | 1.000000 | 7.18673e-14 | 1.000000 |
| rad50                         | 5.33849e-14 | 1.000000 | 5.33849e-14 | 1.000000 |
| rad70                         | 4.51393e-15 | 1.000000 | 4.51393e-15 | 1.000000 |
| rad55                         | 1.98858e-15 | 1.000000 | 1.98858e-15 | 1.000000 |
| PAH1+H                        | 9.25755e-16 | 1.000000 | 9.25755e-16 | 1.000000 |
| Phenyl+cycC3H4                | 7.87809e-16 | 1.000000 | 0.000000    | 1.000000 |
| rad52                         | 3.56646e-16 | 1.000000 | 3.56646e-16 | 1.000000 |
| rad58                         | 1.11974e-16 | 1.000000 | 1.11974e-16 | 1.000000 |
| rad51                         | 9.24593e-17 | 1.000000 | 9.24593e-17 | 1.000000 |
| rad34                         | 4.89840e-17 | 1.000000 | 4.89840e-17 | 1.000000 |
| rad41                         | 5.95288e-18 | 1.000000 | 5.95288e-18 | 1.000000 |
| rad42                         | 5.63955e-18 | 1.000000 | 5.63955e-18 | 1.000000 |
| rad65                         | 1.88024e-18 | 1.000000 | 1.88024e-18 | 1.000000 |
| rad6                          | 7.79884e-19 | 1.000000 | 7.79884e-19 | 1.000000 |
| PhcycC3H3_B+H                 | 2.38335e-19 | 1.000000 | 2.38335e-19 | 1.000000 |
| rad28                         | 6.95813e-22 | 1.000000 | 6.95813e-22 | 1.000000 |
| rad2                          | 4.51682e-22 | 1.000000 | 4.51682e-22 | 1.000000 |
| rad26                         | 8.84905e-23 | 1.000000 | 8.84905e-23 | 1.000000 |
| rad7                          | 6.06417e-23 | 1.000000 | 6.06417e-23 | 1.000000 |
| rad1                          | 2.87495e-23 | 1.000000 | 2.87495e-23 | 1.000000 |
| rad10                         | 2.35061e-23 | 1.000000 | 2.35061e-23 | 1.000000 |
| rad11                         | 1.50886e-23 | 1.000000 | 1.50886e-23 | 1.000000 |
| Benzene+cycloprop-1-enylidene | 1.03290e-23 | 1.000000 | 1.03290e-23 | 1.000000 |
| rad53                         | 5.59114e-24 | 1.000000 | 5.59114e-24 | 1.000000 |
| rad3                          | 2.87589e-24 | 1.000000 | 2.87589e-24 | 1.000000 |
| rad4                          | 1.45491e-24 | 1.000000 | 1.45491e-24 | 1.000000 |
| rad13                         | 3.12958e-25 | 1.000000 | 3.12958e-25 | 1.000000 |
| rad64                         | 3.41889e-26 | 1.000000 | 3.41889e-26 | 1.000000 |
| rad9                          | 1.40495e-27 | 1.000000 | 1.40495e-27 | 1.000000 |
| rad33                         | 5.88847e-28 | 1.000000 | 5.88847e-28 | 1.000000 |
| rad14                         | 3.19782e-28 | 1.000000 | 3.19782e-28 | 1.000000 |
| rad27                         | 2.60077e-28 | 1.000000 | 2.60077e-28 | 1.000000 |
| rad25                         | 2.12644e-28 | 1.000000 | 2.12644e-28 | 1.000000 |
| rad47                         | 9.67598e-29 | 1.000000 | 9.67598e-29 | 1.000000 |
| rad23                         | 4.23058e-30 | 1.000000 | 4.23058e-30 | 1.000000 |
| rad15                         | 6.09639e-31 | 1.000000 | 6.09639e-31 | 1.000000 |
| rad61                         | 5.69538e-32 | 1.000000 | 5.69538e-32 | 1.000000 |
| rad5                          | 4.67832e-32 | 1.000000 | 4.67832e-32 | 1.000000 |
| rad45                         | 3.87939e-32 | 1.000000 | 3.87939e-32 | 1.000000 |

|           |             |         |             |         |
|-----------|-------------|---------|-------------|---------|
| rad19anti | 1.15193e-32 | 1.00000 | 1.15193e-32 | 1.00000 |
| rad31     | 8.50942e-33 | 1.00000 | 8.50942e-33 | 1.00000 |
| rad36     | 2.37545e-33 | 1.00000 | 2.37545e-33 | 1.00000 |
| rad22     | 2.12155e-33 | 1.00000 | 2.12155e-33 | 1.00000 |
| rad20     | 1.62048e-33 | 1.00000 | 1.62048e-33 | 1.00000 |
| rad21     | 1.19663e-33 | 1.00000 | 1.19663e-33 | 1.00000 |
| rad56     | 2.42296e-35 | 1.00000 | 2.42296e-35 | 1.00000 |
| rad18     | 8.54372e-36 | 1.00000 | 8.54372e-36 | 1.00000 |
| rad12     | 6.69502e-36 | 1.00000 | 6.69502e-36 | 1.00000 |
| rad68syn  | 8.42595e-39 | 1.00000 | 8.42595e-39 | 1.00000 |
| rad68anti | 7.18704e-39 | 1.00000 | 7.18704e-39 | 1.00000 |
| rad24     | 6.63776e-40 | 1.00000 | 6.63776e-40 | 1.00000 |
| rad19syn  | 3.07655e-42 | 1.00000 | 3.07655e-42 | 1.00000 |
| rad73     | 9.79983e-47 | 1.00000 | 9.79983e-47 | 1.00000 |
| rad40syn  | 2.86892e-47 | 1.00000 | 2.86892e-47 | 1.00000 |
| rad40anti | 2.35086e-47 | 1.00000 | 2.35086e-47 | 1.00000 |
| PAH8+H    | 1.67586e-51 | 1.00000 | 1.67586e-51 | 1.00000 |
| rad71     | 3.39149e-55 | 1.00000 | 3.39149e-55 | 1.00000 |
| rad8      | 1.06882e-62 | 1.00000 | 1.06882e-62 | 1.00000 |

0.100000000E-02 Pa, 80.0000000 K

| Rate constant             | True (fraction)        | Effective (fraction)   |
|---------------------------|------------------------|------------------------|
| Total                     | 4.17084e-16 (1.00 )    | 4.17084e-16 (1.00 )    |
| Formation of rad19        | 4.17084e-16 (1.000 )   | 4.17084e-16 (1.000 )   |
| H-abstraction to cyc2enyl | 8.98751e-27 (2.15e-11) | 8.98751e-27 (2.15e-11) |
| H-abstraction to cyclenyl | 4.00120e-36 (9.59e-21) | 4.00120e-36 (9.59e-21) |

| species                       | PYtrue      | Cumul    | PYeffective | Cumul    |
|-------------------------------|-------------|----------|-------------|----------|
| Indene+H                      | 0.999747    | 0.999747 | 0.999747    | 0.999747 |
| PhCHCCH2+H                    | 0.000240275 | 0.999987 | 0.000240275 | 0.999987 |
| PhCCH+CH3                     | 4.18601e-06 | 0.999991 | 4.18601e-06 | 0.999991 |
| C2H2+PhCH2                    | 3.03297e-06 | 0.999994 | 3.03297e-06 | 0.999994 |
| PhCCCH3+H                     | 2.37730e-06 | 0.999997 | 2.37730e-06 | 0.999997 |
| Ph+MeAc                       | 1.80096e-06 | 0.999999 | 1.80096e-06 | 0.999999 |
| rad67                         | 5.42400e-07 | 0.999999 | 5.42400e-07 | 0.999999 |
| rad35                         | 2.38871e-07 | 0.999999 | 2.38871e-07 | 0.999999 |
| Ph+Allene                     | 1.63607e-07 | 1.000000 | 1.63607e-07 | 1.000000 |
| PAH7+H                        | 2.10872e-08 | 1.000000 | 2.10872e-08 | 1.000000 |
| PhCH2CCH+H                    | 2.05029e-08 | 1.000000 | 2.05029e-08 | 1.000000 |
| rad39                         | 5.94960e-09 | 1.000000 | 5.94960e-09 | 1.000000 |
| rad37                         | 5.52787e-09 | 1.000000 | 5.52787e-09 | 1.000000 |
| rad30                         | 4.47771e-09 | 1.000000 | 4.47771e-09 | 1.000000 |
| PAH9+H                        | 3.02627e-10 | 1.000000 | 3.02627e-10 | 1.000000 |
| rad38                         | 1.29531e-10 | 1.000000 | 1.29531e-10 | 1.000000 |
| Benzene+cycloprop-2-enylidene | 2.15484e-11 | 1.000000 | 2.15484e-11 | 1.000000 |
| rad60syn                      | 2.04673e-11 | 1.000000 | 2.04673e-11 | 1.000000 |
| rad60anti                     | 1.00391e-11 | 1.000000 | 1.00391e-11 | 1.000000 |
| PAH3+H                        | 8.68289e-12 | 1.000000 | 8.68289e-12 | 1.000000 |
| PAH10+CH3                     | 7.94091e-12 | 1.000000 | 7.94091e-12 | 1.000000 |
| rad46                         | 7.89668e-12 | 1.000000 | 7.89668e-12 | 1.000000 |
| rad59                         | 1.78396e-12 | 1.000000 | 1.78396e-12 | 1.000000 |
| PhcycC3H3_A+H                 | 1.01059e-12 | 1.000000 | 1.01059e-12 | 1.000000 |
| rad43                         | 3.57061e-13 | 1.000000 | 3.57061e-13 | 1.000000 |
| rad54                         | 2.93729e-13 | 1.000000 | 2.93729e-13 | 1.000000 |
| rad62                         | 7.73563e-14 | 1.000000 | 7.73563e-14 | 1.000000 |
| rad50                         | 5.70619e-14 | 1.000000 | 5.70619e-14 | 1.000000 |
| rad70                         | 5.00850e-15 | 1.000000 | 5.00850e-15 | 1.000000 |
| rad55                         | 2.20831e-15 | 1.000000 | 2.20831e-15 | 1.000000 |
| Phenyl+cycC3H4                | 1.32430e-15 | 1.000000 | 0.00000     | 1.000000 |
| PAH1+H                        | 1.06910e-15 | 1.000000 | 1.06910e-15 | 1.000000 |
| rad52                         | 3.87316e-16 | 1.000000 | 3.87316e-16 | 1.000000 |
| rad58                         | 1.25544e-16 | 1.000000 | 1.25544e-16 | 1.000000 |
| rad51                         | 1.02379e-16 | 1.000000 | 1.02379e-16 | 1.000000 |
| rad34                         | 5.67026e-17 | 1.000000 | 5.67026e-17 | 1.000000 |
| rad41                         | 7.32879e-18 | 1.000000 | 7.32879e-18 | 1.000000 |
| rad42                         | 6.74493e-18 | 1.000000 | 6.74493e-18 | 1.000000 |
| rad65                         | 2.10239e-18 | 1.000000 | 2.10239e-18 | 1.000000 |
| PhcycC3H3_B+H                 | 1.96138e-18 | 1.000000 | 1.96138e-18 | 1.000000 |
| rad6                          | 3.83225e-19 | 1.000000 | 3.83225e-19 | 1.000000 |
| Benzene+cycloprop-1-enylidene | 9.59328e-21 | 1.000000 | 9.59328e-21 | 1.000000 |
| rad28                         | 3.43996e-22 | 1.000000 | 3.43996e-22 | 1.000000 |
| rad2                          | 2.18572e-22 | 1.000000 | 2.18572e-22 | 1.000000 |
| rad26                         | 4.34908e-23 | 1.000000 | 4.34908e-23 | 1.000000 |
| rad53                         | 4.19184e-23 | 1.000000 | 4.19184e-23 | 1.000000 |
| rad7                          | 2.96244e-23 | 1.000000 | 2.96244e-23 | 1.000000 |
| rad1                          | 1.39488e-23 | 1.000000 | 1.39488e-23 | 1.000000 |
| rad10                         | 1.13440e-23 | 1.000000 | 1.13440e-23 | 1.000000 |

|           |             |          |             |          |
|-----------|-------------|----------|-------------|----------|
| rad11     | 7.36651e-24 | 1.000000 | 7.36651e-24 | 1.000000 |
| rad3      | 1.38944e-24 | 1.000000 | 1.38944e-24 | 1.000000 |
| rad4      | 7.03345e-25 | 1.000000 | 7.03345e-25 | 1.000000 |
| rad64     | 5.09754e-25 | 1.000000 | 5.09754e-25 | 1.000000 |
| rad13     | 1.54100e-25 | 1.000000 | 1.54100e-25 | 1.000000 |
| rad9      | 8.97903e-28 | 1.000000 | 8.97903e-28 | 1.000000 |
| rad33     | 2.90222e-28 | 1.000000 | 2.90222e-28 | 1.000000 |
| rad14     | 1.57130e-28 | 1.000000 | 1.57130e-28 | 1.000000 |
| rad27     | 1.26617e-28 | 1.000000 | 1.26617e-28 | 1.000000 |
| rad25     | 1.04917e-28 | 1.000000 | 1.04917e-28 | 1.000000 |
| rad47     | 8.56448e-29 | 1.000000 | 8.56448e-29 | 1.000000 |
| rad61     | 8.42146e-30 | 1.000000 | 8.42146e-30 | 1.000000 |
| rad23     | 1.47011e-30 | 1.000000 | 1.47011e-30 | 1.000000 |
| rad15     | 3.89956e-31 | 1.000000 | 3.89956e-31 | 1.000000 |
| rad5      | 3.21501e-32 | 1.000000 | 3.21501e-32 | 1.000000 |
| rad19anti | 1.65425e-32 | 1.000000 | 1.65425e-32 | 1.000000 |
| rad45     | 1.32983e-32 | 1.000000 | 1.32983e-32 | 1.000000 |
| rad56     | 1.32187e-32 | 1.000000 | 1.32187e-32 | 1.000000 |
| rad31     | 4.19526e-33 | 1.000000 | 4.19526e-33 | 1.000000 |
| rad20     | 8.33094e-34 | 1.000000 | 8.33094e-34 | 1.000000 |
| rad36     | 8.14131e-34 | 1.000000 | 8.14131e-34 | 1.000000 |
| rad22     | 7.68334e-34 | 1.000000 | 7.68334e-34 | 1.000000 |
| rad21     | 6.16247e-34 | 1.000000 | 6.16247e-34 | 1.000000 |
| rad68syn  | 1.87541e-34 | 1.000000 | 1.87541e-34 | 1.000000 |
| rad68anti | 1.57941e-34 | 1.000000 | 1.57941e-34 | 1.000000 |
| rad12     | 4.30087e-36 | 1.000000 | 4.30087e-36 | 1.000000 |
| rad18     | 4.27809e-36 | 1.000000 | 4.27809e-36 | 1.000000 |
| rad24     | 2.41469e-40 | 1.000000 | 2.41469e-40 | 1.000000 |
| rad19syn  | 5.56519e-42 | 1.000000 | 5.56519e-42 | 1.000000 |
| rad73     | 1.03864e-44 | 1.000000 | 1.03864e-44 | 1.000000 |
| rad40syn  | 2.29317e-45 | 1.000000 | 2.29317e-45 | 1.000000 |
| rad40anti | 1.87123e-45 | 1.000000 | 1.87123e-45 | 1.000000 |
| PAH8+H    | 1.56390e-49 | 1.000000 | 1.56390e-49 | 1.000000 |
| rad71     | 3.90410e-53 | 1.000000 | 3.90410e-53 | 1.000000 |
| rad8      | 1.28527e-62 | 1.000000 | 1.28527e-62 | 1.000000 |

0.100000000E-02 Pa, 90.0000000 K

=====

| Rate constant             | True (fraction)        | Effective (fraction)   |
|---------------------------|------------------------|------------------------|
| Total                     | 7.74016e-16 (1.00 )    | 7.74016e-16 (1.00 )    |
| Formation of rad19        | 7.74016e-16 (1.000 )   | 7.74016e-16 (1.000 )   |
| H-abstraction to cyc2enyl | 2.91736e-25 (3.77e-10) | 2.91736e-25 (3.77e-10) |
| H-abstraction to cyclenyl | 1.47814e-33 (1.91e-18) | 1.47814e-33 (1.91e-18) |

| species                       | PYtrue      | Cumul    | PYeffective | Cumul    |
|-------------------------------|-------------|----------|-------------|----------|
| Indene+H                      | 0.999741    | 0.999741 | 0.999741    | 0.999741 |
| PhCHCCH2+H                    | 0.000245930 | 0.999987 | 0.000245930 | 0.999987 |
| PhCCH+CH3                     | 4.29286e-06 | 0.999991 | 4.29286e-06 | 0.999991 |
| C2H2+PhCH2                    | 3.12610e-06 | 0.999994 | 3.12610e-06 | 0.999994 |
| PhCCCH3+H                     | 2.44408e-06 | 0.999997 | 2.44408e-06 | 0.999997 |
| Ph+MeAc                       | 1.86284e-06 | 0.999999 | 1.86284e-06 | 0.999999 |
| rad67                         | 5.60070e-07 | 0.999999 | 5.60070e-07 | 0.999999 |
| rad35                         | 2.46329e-07 | 0.999999 | 2.46329e-07 | 0.999999 |
| Ph+Allene                     | 1.71209e-07 | 1.000000 | 1.71209e-07 | 1.000000 |
| PAH7+H                        | 2.19237e-08 | 1.000000 | 2.19237e-08 | 1.000000 |
| PhCH2CCH+H                    | 2.16133e-08 | 1.000000 | 2.16133e-08 | 1.000000 |
| rad39                         | 6.18612e-09 | 1.000000 | 6.18612e-09 | 1.000000 |
| rad37                         | 5.76039e-09 | 1.000000 | 5.76039e-09 | 1.000000 |
| rad30                         | 4.62099e-09 | 1.000000 | 4.62099e-09 | 1.000000 |
| Benzene+cycloprop-2-enylidene | 3.76912e-10 | 1.000000 | 3.76912e-10 | 1.000000 |
| PAH9+H                        | 3.15249e-10 | 1.000000 | 3.15249e-10 | 1.000000 |
| rad38                         | 1.35469e-10 | 1.000000 | 1.35469e-10 | 1.000000 |
| rad60syn                      | 2.13899e-11 | 1.000000 | 2.13899e-11 | 1.000000 |
| rad60anti                     | 1.05034e-11 | 1.000000 | 1.05034e-11 | 1.000000 |
| PAH3+H                        | 9.21838e-12 | 1.000000 | 9.21838e-12 | 1.000000 |
| PAH10+CH3                     | 8.64324e-12 | 1.000000 | 8.64324e-12 | 1.000000 |
| rad46                         | 8.28658e-12 | 1.000000 | 8.28658e-12 | 1.000000 |
| rad59                         | 1.88949e-12 | 1.000000 | 1.88949e-12 | 1.000000 |
| PhcycC3H3_A+H                 | 1.23242e-12 | 1.000000 | 1.23242e-12 | 1.000000 |
| rad43                         | 3.84835e-13 | 1.000000 | 3.84835e-13 | 1.000000 |
| rad54                         | 3.19395e-13 | 1.000000 | 3.19395e-13 | 1.000000 |
| rad62                         | 8.35853e-14 | 1.000000 | 8.35853e-14 | 1.000000 |
| rad50                         | 6.12244e-14 | 1.000000 | 6.12244e-14 | 1.000000 |
| rad70                         | 5.59013e-15 | 1.000000 | 5.59013e-15 | 1.000000 |
| rad55                         | 2.46665e-15 | 1.000000 | 2.46665e-15 | 1.000000 |
| Phenyl+cycC3H4                | 2.14284e-15 | 1.000000 | 0.00000     | 1.000000 |
| PAH1+H                        | 1.24448e-15 | 1.000000 | 1.24448e-15 | 1.000000 |
| rad52                         | 4.22676e-16 | 1.000000 | 4.22676e-16 | 1.000000 |

|                               |             |          |             |          |
|-------------------------------|-------------|----------|-------------|----------|
| rad58                         | 1.41698e-16 | 1.000000 | 1.41698e-16 | 1.000000 |
| rad51                         | 1.14066e-16 | 1.000000 | 1.14066e-16 | 1.000000 |
| rad34                         | 6.61673e-17 | 1.000000 | 6.61673e-17 | 1.000000 |
| PhcycC3H3_B+H                 | 1.04002e-17 | 1.000000 | 1.04002e-17 | 1.000000 |
| rad41                         | 9.07842e-18 | 1.000000 | 9.07842e-18 | 1.000000 |
| rad42                         | 8.13252e-18 | 1.000000 | 8.13252e-18 | 1.000000 |
| rad65                         | 2.36675e-18 | 1.000000 | 2.36675e-18 | 1.000000 |
| Benzene+cycloprop-1-enylidene | 1.90970e-18 | 1.000000 | 1.90970e-18 | 1.000000 |
| rad6                          | 2.08085e-19 | 1.000000 | 2.08085e-19 | 1.000000 |
| rad53                         | 2.02223e-22 | 1.000000 | 2.02223e-22 | 1.000000 |
| rad28                         | 1.87915e-22 | 1.000000 | 1.87915e-22 | 1.000000 |
| rad2                          | 1.17168e-22 | 1.000000 | 1.17168e-22 | 1.000000 |
| rad26                         | 2.36574e-23 | 1.000000 | 2.36574e-23 | 1.000000 |
| rad7                          | 1.60132e-23 | 1.000000 | 1.60132e-23 | 1.000000 |
| rad1                          | 7.49936e-24 | 1.000000 | 7.49936e-24 | 1.000000 |
| rad10                         | 6.06860e-24 | 1.000000 | 6.06860e-24 | 1.000000 |
| rad64                         | 4.24427e-24 | 1.000000 | 4.24427e-24 | 1.000000 |
| rad11                         | 3.98034e-24 | 1.000000 | 3.98034e-24 | 1.000000 |
| rad3                          | 7.43967e-25 | 1.000000 | 7.43967e-25 | 1.000000 |
| rad4                          | 3.76864e-25 | 1.000000 | 3.76864e-25 | 1.000000 |
| rad13                         | 8.38615e-26 | 1.000000 | 8.38615e-26 | 1.000000 |
| rad9                          | 6.37419e-28 | 1.000000 | 6.37419e-28 | 1.000000 |
| rad61                         | 4.05769e-28 | 1.000000 | 4.05769e-28 | 1.000000 |
| rad33                         | 1.58098e-28 | 1.000000 | 1.58098e-28 | 1.000000 |
| rad14                         | 8.54212e-29 | 1.000000 | 8.54212e-29 | 1.000000 |
| rad47                         | 7.77162e-29 | 1.000000 | 7.77162e-29 | 1.000000 |
| rad27                         | 6.82793e-29 | 1.000000 | 6.82793e-29 | 1.000000 |
| rad25                         | 5.72135e-29 | 1.000000 | 5.72135e-29 | 1.000000 |
| rad56                         | 1.28662e-30 | 1.000000 | 1.28662e-30 | 1.000000 |
| rad23                         | 5.98781e-31 | 1.000000 | 5.98781e-31 | 1.000000 |
| rad15                         | 2.77126e-31 | 1.000000 | 2.77126e-31 | 1.000000 |
| rad68syn                      | 2.85522e-32 | 1.000000 | 2.85522e-32 | 1.000000 |
| rad19anti                     | 2.57604e-32 | 1.000000 | 2.57604e-32 | 1.000000 |
| rad68anti                     | 2.36978e-32 | 1.000000 | 2.36978e-32 | 1.000000 |
| rad5                          | 2.33734e-32 | 1.000000 | 2.33734e-32 | 1.000000 |
| rad45                         | 5.35571e-33 | 1.000000 | 5.35571e-33 | 1.000000 |
| rad31                         | 2.29699e-33 | 1.000000 | 2.29699e-33 | 1.000000 |
| rad20                         | 4.74998e-34 | 1.000000 | 4.74998e-34 | 1.000000 |
| rad21                         | 3.52000e-34 | 1.000000 | 3.52000e-34 | 1.000000 |
| rad36                         | 3.27866e-34 | 1.000000 | 3.27866e-34 | 1.000000 |
| rad22                         | 3.26353e-34 | 1.000000 | 3.26353e-34 | 1.000000 |
| rad12                         | 3.07034e-36 | 1.000000 | 3.07034e-36 | 1.000000 |
| rad18                         | 2.39118e-36 | 1.000000 | 2.39118e-36 | 1.000000 |
| rad73                         | 1.45545e-39 | 1.000000 | 1.45545e-39 | 1.000000 |
| rad24                         | 1.04002e-40 | 1.000000 | 1.04002e-40 | 1.000000 |
| rad19syn                      | 1.05530e-41 | 1.000000 | 1.05530e-41 | 1.000000 |
| rad40syn                      | 5.28792e-43 | 1.000000 | 5.28792e-43 | 1.000000 |
| rad40anti                     | 4.29486e-43 | 1.000000 | 4.29486e-43 | 1.000000 |
| PAH8+H                        | 4.16439e-47 | 1.000000 | 4.16439e-47 | 1.000000 |
| rad71                         | 1.29590e-50 | 1.000000 | 1.29590e-50 | 1.000000 |
| rad8                          | 1.62088e-62 | 1.000000 | 1.62088e-62 | 1.000000 |

0.100000000E-02 Pa, 100.000000 K

=====

| Rate constant             | True (fraction)        | Effective (fraction)   |
|---------------------------|------------------------|------------------------|
| Total                     | 1.28255e-15 (1.00 )    | 1.28255e-15 (1.00 )    |
| Formation of rad19        | 1.28255e-15 (1.00 )    | 1.28255e-15 (1.00 )    |
| H-abstraction to cyc2enyl | 4.68359e-24 (3.65e-09) | 4.68359e-24 (3.65e-09) |
| H-abstraction to cyclenyl | 1.66242e-31 (1.30e-16) | 1.66242e-31 (1.30e-16) |

| species                       | PYtrue      | Cumul    | PYeffective | Cumul    |
|-------------------------------|-------------|----------|-------------|----------|
| Indene+H                      | 0.999735    | 0.999735 | 0.999735    | 0.999735 |
| PhCHCCH2+H                    | 0.000251986 | 0.999987 | 0.000251986 | 0.999987 |
| PhCCH+CH3                     | 4.40722e-06 | 0.999991 | 4.40722e-06 | 0.999991 |
| C2H2+PhCH2                    | 3.22659e-06 | 0.999995 | 3.22659e-06 | 0.999995 |
| PhCCCH3+H                     | 2.51586e-06 | 0.999997 | 2.51586e-06 | 0.999997 |
| Ph+MeAc                       | 1.92983e-06 | 0.999999 | 1.92983e-06 | 0.999999 |
| rad67                         | 5.79174e-07 | 1.000000 | 5.79174e-07 | 1.000000 |
| rad35                         | 2.54380e-07 | 1.000000 | 2.54380e-07 | 1.000000 |
| Ph+Allene                     | 1.79562e-07 | 1.000000 | 1.79562e-07 | 1.000000 |
| PhCH2CCH+H                    | 2.28438e-08 | 1.000000 | 2.28438e-08 | 1.000000 |
| PAH7+H                        | 2.28355e-08 | 1.000000 | 2.28355e-08 | 1.000000 |
| rad39                         | 6.44388e-09 | 1.000000 | 6.44388e-09 | 1.000000 |
| rad37                         | 6.01455e-09 | 1.000000 | 6.01455e-09 | 1.000000 |
| rad30                         | 4.77598e-09 | 1.000000 | 4.77598e-09 | 1.000000 |
| Benzene+cycloprop-2-enylidene | 3.65179e-09 | 1.000000 | 3.65179e-09 | 1.000000 |
| PAH9+H                        | 3.29061e-10 | 1.000000 | 3.29061e-10 | 1.000000 |
| rad38                         | 1.42003e-10 | 1.000000 | 1.42003e-10 | 1.000000 |

|                               |             |         |             |         |
|-------------------------------|-------------|---------|-------------|---------|
| rad60syn                      | 2.24029e-11 | 1.00000 | 2.24029e-11 | 1.00000 |
| rad60anti                     | 1.10139e-11 | 1.00000 | 1.10139e-11 | 1.00000 |
| PAH3+H                        | 9.81743e-12 | 1.00000 | 9.81743e-12 | 1.00000 |
| PAH10+CH3                     | 9.45002e-12 | 1.00000 | 9.45002e-12 | 1.00000 |
| rad46                         | 8.71705e-12 | 1.00000 | 8.71705e-12 | 1.00000 |
| rad59                         | 2.00718e-12 | 1.00000 | 2.00718e-12 | 1.00000 |
| PhcycC3H3_A+H                 | 1.51346e-12 | 1.00000 | 1.51346e-12 | 1.00000 |
| rad43                         | 4.16336e-13 | 1.00000 | 4.16336e-13 | 1.00000 |
| rad54                         | 3.48849e-13 | 1.00000 | 3.48849e-13 | 1.00000 |
| rad62                         | 9.06598e-14 | 1.00000 | 9.06598e-14 | 1.00000 |
| rad50                         | 6.59429e-14 | 1.00000 | 6.59429e-14 | 1.00000 |
| rad70                         | 6.27639e-15 | 1.00000 | 6.27639e-15 | 1.00000 |
| Phenyl+cycC3H4                | 3.36905e-15 | 1.00000 | 0.00000     | 1.00000 |
| rad55                         | 2.77146e-15 | 1.00000 | 2.77146e-15 | 1.00000 |
| PAH1+H                        | 1.46020e-15 | 1.00000 | 1.46020e-15 | 1.00000 |
| rad52                         | 4.63545e-16 | 1.00000 | 4.63545e-16 | 1.00000 |
| rad58                         | 1.61003e-16 | 1.00000 | 1.61003e-16 | 1.00000 |
| Benzene+cycloprop-1-enylidene | 1.29619e-16 | 1.00000 | 1.29619e-16 | 1.00000 |
| rad51                         | 1.27890e-16 | 1.00000 | 1.27890e-16 | 1.00000 |
| rad34                         | 7.78385e-17 | 1.00000 | 7.78385e-17 | 1.00000 |
| PhcycC3H3_B+H                 | 4.09123e-17 | 1.00000 | 4.09123e-17 | 1.00000 |
| rad41                         | 1.13170e-17 | 1.00000 | 1.13170e-17 | 1.00000 |
| rad42                         | 9.87999e-18 | 1.00000 | 9.87999e-18 | 1.00000 |
| rad65                         | 2.68274e-18 | 1.00000 | 2.68274e-18 | 1.00000 |
| rad6                          | 1.21802e-19 | 1.00000 | 1.21802e-19 | 1.00000 |
| rad53                         | 7.24199e-22 | 1.00000 | 7.24199e-22 | 1.00000 |
| rad28                         | 1.10649e-22 | 1.00000 | 1.10649e-22 | 1.00000 |
| rad2                          | 6.78386e-23 | 1.00000 | 6.78386e-23 | 1.00000 |
| rad64                         | 2.36867e-23 | 1.00000 | 2.36867e-23 | 1.00000 |
| rad26                         | 1.38917e-23 | 1.00000 | 1.38917e-23 | 1.00000 |
| rad7                          | 9.34039e-24 | 1.00000 | 9.34039e-24 | 1.00000 |
| rad1                          | 4.35603e-24 | 1.00000 | 4.35603e-24 | 1.00000 |
| rad10                         | 3.50813e-24 | 1.00000 | 3.50813e-24 | 1.00000 |
| rad11                         | 2.32115e-24 | 1.00000 | 2.32115e-24 | 1.00000 |
| rad3                          | 4.30387e-25 | 1.00000 | 4.30387e-25 | 1.00000 |
| rad4                          | 2.18187e-25 | 1.00000 | 2.18187e-25 | 1.00000 |
| rad13                         | 4.92057e-26 | 1.00000 | 4.92057e-26 | 1.00000 |
| rad61                         | 9.04338e-27 | 1.00000 | 9.04338e-27 | 1.00000 |
| rad9                          | 4.90823e-28 | 1.00000 | 4.90823e-28 | 1.00000 |
| rad33                         | 9.28628e-29 | 1.00000 | 9.28628e-29 | 1.00000 |
| rad47                         | 7.19605e-29 | 1.00000 | 7.19605e-29 | 1.00000 |
| rad56                         | 5.01139e-29 | 1.00000 | 5.01139e-29 | 1.00000 |
| rad14                         | 5.01085e-29 | 1.00000 | 5.01085e-29 | 1.00000 |
| rad27                         | 3.97650e-29 | 1.00000 | 3.97650e-29 | 1.00000 |
| rad25                         | 3.36411e-29 | 1.00000 | 3.36411e-29 | 1.00000 |
| rad68syn                      | 1.54815e-30 | 1.00000 | 1.54815e-30 | 1.00000 |
| rad68anti                     | 1.27124e-30 | 1.00000 | 1.27124e-30 | 1.00000 |
| rad23                         | 2.74957e-31 | 1.00000 | 2.74957e-31 | 1.00000 |
| rad15                         | 2.13653e-31 | 1.00000 | 2.13653e-31 | 1.00000 |
| rad19anti                     | 4.31162e-32 | 1.00000 | 4.31162e-32 | 1.00000 |
| rad5                          | 1.77270e-32 | 1.00000 | 1.77270e-32 | 1.00000 |
| rad45                         | 2.43604e-33 | 1.00000 | 2.43604e-33 | 1.00000 |
| rad31                         | 1.36204e-33 | 1.00000 | 1.36204e-33 | 1.00000 |
| rad20                         | 2.92855e-34 | 1.00000 | 2.92855e-34 | 1.00000 |
| rad21                         | 2.17441e-34 | 1.00000 | 2.17441e-34 | 1.00000 |
| rad22                         | 1.56252e-34 | 1.00000 | 1.56252e-34 | 1.00000 |
| rad36                         | 1.49147e-34 | 1.00000 | 1.49147e-34 | 1.00000 |
| rad12                         | 2.37853e-36 | 1.00000 | 2.37853e-36 | 1.00000 |
| rad40syn                      | 1.99137e-36 | 1.00000 | 1.99137e-36 | 1.00000 |
| rad40anti                     | 1.51578e-36 | 1.00000 | 1.51578e-36 | 1.00000 |
| rad18                         | 1.45153e-36 | 1.00000 | 1.45153e-36 | 1.00000 |
| rad73                         | 7.53021e-37 | 1.00000 | 7.53021e-37 | 1.00000 |
| rad24                         | 5.10523e-41 | 1.00000 | 5.10523e-41 | 1.00000 |
| rad19syn                      | 2.08907e-41 | 1.00000 | 2.08907e-41 | 1.00000 |
| PAH8+H                        | 2.22320e-44 | 1.00000 | 2.22320e-44 | 1.00000 |
| rad71                         | 9.00447e-48 | 1.00000 | 9.00447e-48 | 1.00000 |
| rad8                          | 2.12557e-62 | 1.00000 | 2.12557e-62 | 1.00000 |

0.100000000E-02 Pa, 110.000000 K

| Rate constant             | True (fraction)        | Effective (fraction)   |
|---------------------------|------------------------|------------------------|
| Total                     | 1.95524e-15 (1.00 )    | 1.95524e-15 (1.00 )    |
| Formation of rad19        | 1.95524e-15 (1.000 )   | 1.95524e-15 (1.000 )   |
| H-abstraction to cyc2enyl | 4.50936e-23 (2.31e-08) | 4.50936e-23 (2.31e-08) |
| H-abstraction to cyclenyl | 7.87782e-30 (4.03e-15) | 7.87782e-30 (4.03e-15) |

  

| species  | PYtrue   | Cumul    | PYeffective | Cumul    |
|----------|----------|----------|-------------|----------|
| Indene+H | 0.999728 | 0.999728 | 0.999728    | 0.999728 |

|                               |             |          |             |          |
|-------------------------------|-------------|----------|-------------|----------|
| PhCHCCH2+H                    | 0.000258468 | 0.999986 | 0.000258468 | 0.999986 |
| PhCCH+CH3                     | 4.52960e-06 | 0.999991 | 4.52960e-06 | 0.999991 |
| C2H2+PhCH2                    | 3.33506e-06 | 0.999994 | 3.33506e-06 | 0.999994 |
| PhCCCH3+H                     | 2.59302e-06 | 0.999997 | 2.59302e-06 | 0.999997 |
| Ph+MeAc                       | 2.00237e-06 | 0.999999 | 2.00237e-06 | 0.999999 |
| rad67                         | 5.99835e-07 | 1.000000 | 5.99835e-07 | 1.000000 |
| rad35                         | 2.63074e-07 | 1.000000 | 2.63074e-07 | 1.000000 |
| Ph+Allene                     | 1.88753e-07 | 1.000000 | 1.88753e-07 | 1.000000 |
| PhCH2CCH+H                    | 2.42101e-08 | 1.000000 | 2.42101e-08 | 1.000000 |
| PAH7+H                        | 2.38305e-08 | 1.000000 | 2.38305e-08 | 1.000000 |
| Benzene+cycloprop-2-enylidene | 2.30629e-08 | 1.000000 | 2.30629e-08 | 1.000000 |
| rad39                         | 6.72506e-09 | 1.000000 | 6.72506e-09 | 1.000000 |
| rad37                         | 6.29263e-09 | 1.000000 | 6.29263e-09 | 1.000000 |
| rad30                         | 4.94370e-09 | 1.000000 | 4.94370e-09 | 1.000000 |
| PAH9+H                        | 3.44195e-10 | 1.000000 | 3.44195e-10 | 1.000000 |
| rad38                         | 1.49207e-10 | 1.000000 | 1.49207e-10 | 1.000000 |
| rad60syn                      | 2.35168e-11 | 1.000000 | 2.35168e-11 | 1.000000 |
| rad60anti                     | 1.15761e-11 | 1.000000 | 1.15761e-11 | 1.000000 |
| PAH3+H                        | 1.04892e-11 | 1.000000 | 1.04892e-11 | 1.000000 |
| PAH10+CH3                     | 1.03803e-11 | 1.000000 | 1.03803e-11 | 1.000000 |
| rad46                         | 9.19314e-12 | 1.000000 | 9.19314e-12 | 1.000000 |
| rad59                         | 2.13875e-12 | 1.000000 | 2.13875e-12 | 1.000000 |
| PhcycC3H3_A+H                 | 1.87146e-12 | 1.000000 | 1.87146e-12 | 1.000000 |
| rad43                         | 4.52170e-13 | 1.000000 | 4.52170e-13 | 1.000000 |
| rad54                         | 3.82782e-13 | 1.000000 | 3.82782e-13 | 1.000000 |
| rad62                         | 9.87174e-14 | 1.000000 | 9.87174e-14 | 1.000000 |
| rad50                         | 7.13100e-14 | 1.000000 | 7.13100e-14 | 1.000000 |
| rad70                         | 7.09049e-15 | 1.000000 | 7.09049e-15 | 1.000000 |
| Phenyl+cycC3H4                | 5.18630e-15 | 1.000000 | 0.000000    | 1.000000 |
| Benzene+cycloprop-1-enylidene | 4.02908e-15 | 1.000000 | 4.02908e-15 | 1.000000 |
| rad55                         | 3.13312e-15 | 1.000000 | 3.13312e-15 | 1.000000 |
| PAH1+H                        | 1.72745e-15 | 1.000000 | 1.72745e-15 | 1.000000 |
| rad52                         | 5.11004e-16 | 1.000000 | 5.11004e-16 | 1.000000 |
| rad58                         | 1.84215e-16 | 1.000000 | 1.84215e-16 | 1.000000 |
| rad51                         | 1.44342e-16 | 1.000000 | 1.44342e-16 | 1.000000 |
| PhcycC3H3_B+H                 | 1.30407e-16 | 1.000000 | 1.30407e-16 | 1.000000 |
| rad34                         | 9.23387e-17 | 1.000000 | 9.23387e-17 | 1.000000 |
| rad41                         | 1.42045e-17 | 1.000000 | 1.42045e-17 | 1.000000 |
| rad42                         | 1.20933e-17 | 1.000000 | 1.20933e-17 | 1.000000 |
| rad65                         | 3.06295e-18 | 1.000000 | 3.06295e-18 | 1.000000 |
| rad6                          | 7.55936e-20 | 1.000000 | 7.55936e-20 | 1.000000 |
| rad53                         | 2.10945e-21 | 1.000000 | 2.10945e-21 | 1.000000 |
| rad64                         | 9.95842e-23 | 1.000000 | 9.95842e-23 | 1.000000 |
| rad28                         | 6.90693e-23 | 1.000000 | 6.90693e-23 | 1.000000 |
| rad2                          | 4.17076e-23 | 1.000000 | 4.17076e-23 | 1.000000 |
| rad26                         | 8.65976e-24 | 1.000000 | 8.65976e-24 | 1.000000 |
| rad7                          | 5.78096e-24 | 1.000000 | 5.78096e-24 | 1.000000 |
| rad1                          | 2.68760e-24 | 1.000000 | 2.68760e-24 | 1.000000 |
| rad10                         | 2.15428e-24 | 1.000000 | 2.15428e-24 | 1.000000 |
| rad11                         | 1.43642e-24 | 1.000000 | 1.43642e-24 | 1.000000 |
| rad3                          | 2.64450e-25 | 1.000000 | 2.64450e-25 | 1.000000 |
| rad4                          | 1.34182e-25 | 1.000000 | 1.34182e-25 | 1.000000 |
| rad61                         | 1.15970e-25 | 1.000000 | 1.15970e-25 | 1.000000 |
| rad13                         | 3.06160e-26 | 1.000000 | 3.06160e-26 | 1.000000 |
| rad56                         | 1.00954e-27 | 1.000000 | 1.00954e-27 | 1.000000 |
| rad9                          | 4.03512e-28 | 1.000000 | 4.03512e-28 | 1.000000 |
| rad47                         | 6.77856e-29 | 1.000000 | 6.77856e-29 | 1.000000 |
| rad33                         | 5.78446e-29 | 1.000000 | 5.78446e-29 | 1.000000 |
| rad68syn                      | 4.04761e-29 | 1.000000 | 4.04761e-29 | 1.000000 |
| rad68anti                     | 3.29728e-29 | 1.000000 | 3.29728e-29 | 1.000000 |
| rad14                         | 3.11902e-29 | 1.000000 | 3.11902e-29 | 1.000000 |
| rad27                         | 2.45901e-29 | 1.000000 | 2.45901e-29 | 1.000000 |
| rad25                         | 2.09775e-29 | 1.000000 | 2.09775e-29 | 1.000000 |
| rad15                         | 1.75883e-31 | 1.000000 | 1.75883e-31 | 1.000000 |
| rad23                         | 1.38679e-31 | 1.000000 | 1.38679e-31 | 1.000000 |
| rad19anti                     | 7.71212e-32 | 1.000000 | 7.71212e-32 | 1.000000 |
| rad5                          | 1.38941e-32 | 1.000000 | 1.38941e-32 | 1.000000 |
| rad45                         | 1.21871e-33 | 1.000000 | 1.21871e-33 | 1.000000 |
| rad31                         | 8.60466e-34 | 1.000000 | 8.60466e-34 | 1.000000 |
| rad40syn                      | 3.23202e-34 | 1.000000 | 3.23202e-34 | 1.000000 |
| rad40anti                     | 2.54379e-34 | 1.000000 | 2.54379e-34 | 1.000000 |
| rad20                         | 1.91964e-34 | 1.000000 | 1.91964e-34 | 1.000000 |
| rad21                         | 1.42821e-34 | 1.000000 | 1.42821e-34 | 1.000000 |
| rad22                         | 8.21095e-35 | 1.000000 | 8.21095e-35 | 1.000000 |
| rad36                         | 7.46388e-35 | 1.000000 | 7.46388e-35 | 1.000000 |
| rad73                         | 5.48387e-35 | 1.000000 | 5.48387e-35 | 1.000000 |
| rad12                         | 1.96808e-36 | 1.000000 | 1.96808e-36 | 1.000000 |
| rad18                         | 9.39610e-37 | 1.000000 | 9.39610e-37 | 1.000000 |
| rad19syn                      | 4.31564e-41 | 1.000000 | 4.31564e-41 | 1.000000 |
| rad24                         | 2.78438e-41 | 1.000000 | 2.78438e-41 | 1.000000 |



|        |             |         |             |         |
|--------|-------------|---------|-------------|---------|
| PAH8+H | 1.08848e-41 | 1.00000 | 1.08848e-41 | 1.00000 |
| rad71  | 5.50168e-45 | 1.00000 | 5.50168e-45 | 1.00000 |
| rad8   | 2.88199e-62 | 1.00000 | 2.88199e-62 | 1.00000 |

0.100000000E-02 Pa, 120.000000 K

| Rate constant             | True (fraction)        | Effective (fraction)   |
|---------------------------|------------------------|------------------------|
| Total                     | 2.79817e-15 (1.00 )    | 2.79817e-15 (1.00 )    |
| Formation of rad19        | 2.79817e-15 (1.000 )   | 2.79817e-15 (1.000 )   |
| H-abstraction to cyc2enyl | 2.96039e-22 (1.06e-07) | 2.96039e-22 (1.06e-07) |
| H-abstraction to cyc1enyl | 1.95323e-28 (6.98e-14) | 1.95323e-28 (6.98e-14) |

| species                       | PYtrue      | Cumul    | PYeffective | Cumul    |
|-------------------------------|-------------|----------|-------------|----------|
| Indene+H                      | 0.999721    | 0.999721 | 0.999721    | 0.999721 |
| PhCHCCH2+H                    | 0.000265416 | 0.999986 | 0.000265416 | 0.999986 |
| PhCCH+CH3                     | 4.66071e-06 | 0.999991 | 4.66071e-06 | 0.999991 |
| C2H2+PhCH2                    | 3.45232e-06 | 0.999994 | 3.45232e-06 | 0.999994 |
| PhCCCH3+H                     | 2.67607e-06 | 0.999997 | 2.67607e-06 | 0.999997 |
| Ph+MeAc                       | 2.08106e-06 | 0.999999 | 2.08106e-06 | 0.999999 |
| rad67                         | 6.22219e-07 | 1.000000 | 6.22219e-07 | 1.000000 |
| rad35                         | 2.72479e-07 | 1.000000 | 2.72479e-07 | 1.000000 |
| Ph+Allene                     | 1.98894e-07 | 1.000000 | 1.98894e-07 | 1.000000 |
| Benzene+cycloprop-2-enylidene | 1.05797e-07 | 1.000000 | 1.05797e-07 | 1.000000 |
| PhCH2CCH+H                    | 2.57320e-08 | 1.000000 | 2.57320e-08 | 1.000000 |
| PAH7+H                        | 2.49187e-08 | 1.000000 | 2.49187e-08 | 1.000000 |
| rad39                         | 7.03247e-09 | 1.000000 | 7.03247e-09 | 1.000000 |
| rad37                         | 6.59760e-09 | 1.000000 | 6.59760e-09 | 1.000000 |
| rad30                         | 5.12555e-09 | 1.000000 | 5.12555e-09 | 1.000000 |
| PAH9+H                        | 3.60819e-10 | 1.000000 | 3.60819e-10 | 1.000000 |
| rad38                         | 1.57171e-10 | 1.000000 | 1.57171e-10 | 1.000000 |
| rad60syn                      | 2.47450e-11 | 1.000000 | 2.47450e-11 | 1.000000 |
| rad60anti                     | 1.21967e-11 | 1.000000 | 1.21967e-11 | 1.000000 |
| PAH10+CH3                     | 1.14587e-11 | 1.000000 | 1.14587e-11 | 1.000000 |
| PAH3+H                        | 1.12455e-11 | 1.000000 | 1.12455e-11 | 1.000000 |
| rad46                         | 9.72136e-12 | 1.000000 | 9.72136e-12 | 1.000000 |
| PhcycC3H3_A+H                 | 2.33053e-12 | 1.000000 | 2.33053e-12 | 1.000000 |
| rad59                         | 2.28635e-12 | 1.000000 | 2.28635e-12 | 1.000000 |
| rad43                         | 4.93108e-13 | 1.000000 | 4.93108e-13 | 1.000000 |
| rad54                         | 4.22087e-13 | 1.000000 | 4.22087e-13 | 1.000000 |
| rad62                         | 1.07934e-13 | 1.000000 | 1.07934e-13 | 1.000000 |
| rad50                         | 7.74450e-14 | 1.000000 | 7.74450e-14 | 1.000000 |
| Benzene+cycloprop-1-enylidene | 6.98038e-14 | 1.000000 | 6.98038e-14 | 1.000000 |
| rad70                         | 8.06292e-15 | 1.000000 | 8.06292e-15 | 1.000000 |
| Phenyl+cycC3H4                | 7.86468e-15 | 1.000000 | 0.000000    | 1.000000 |
| rad55                         | 3.56521e-15 | 1.000000 | 3.56521e-15 | 1.000000 |
| PAH1+H                        | 2.06145e-15 | 1.000000 | 2.06145e-15 | 1.000000 |
| rad52                         | 5.66460e-16 | 1.000000 | 5.66460e-16 | 1.000000 |
| PhcycC3H3_B+H                 | 3.56809e-16 | 1.000000 | 3.56809e-16 | 1.000000 |
| rad58                         | 2.12339e-16 | 1.000000 | 2.12339e-16 | 1.000000 |
| rad51                         | 1.64076e-16 | 1.000000 | 1.64076e-16 | 1.000000 |
| rad34                         | 1.10512e-16 | 1.000000 | 1.10512e-16 | 1.000000 |
| rad41                         | 1.79621e-17 | 1.000000 | 1.79621e-17 | 1.000000 |
| rad42                         | 1.49164e-17 | 1.000000 | 1.49164e-17 | 1.000000 |
| rad65                         | 3.52421e-18 | 1.000000 | 3.52421e-18 | 1.000000 |
| rad6                          | 4.91678e-20 | 1.000000 | 4.91678e-20 | 1.000000 |
| rad53                         | 5.30965e-21 | 1.000000 | 5.30965e-21 | 1.000000 |
| rad64                         | 3.40786e-22 | 1.000000 | 3.40786e-22 | 1.000000 |
| rad28                         | 4.51767e-23 | 1.000000 | 4.51767e-23 | 1.000000 |
| rad2                          | 2.69063e-23 | 1.000000 | 2.69063e-23 | 1.000000 |
| rad26                         | 5.66453e-24 | 1.000000 | 5.66453e-24 | 1.000000 |
| rad7                          | 3.75199e-24 | 1.000000 | 3.75199e-24 | 1.000000 |
| rad1                          | 1.74052e-24 | 1.000000 | 1.74052e-24 | 1.000000 |
| rad10                         | 1.38857e-24 | 1.000000 | 1.38857e-24 | 1.000000 |
| rad61                         | 9.89192e-25 | 1.000000 | 9.89192e-25 | 1.000000 |
| rad11                         | 9.32239e-25 | 1.000000 | 9.32239e-25 | 1.000000 |
| rad3                          | 1.70533e-25 | 1.000000 | 1.70533e-25 | 1.000000 |
| rad4                          | 8.66124e-26 | 1.000000 | 8.66124e-26 | 1.000000 |
| rad13                         | 1.99666e-26 | 1.000000 | 1.99666e-26 | 1.000000 |
| rad56                         | 1.24718e-26 | 1.000000 | 1.24718e-26 | 1.000000 |
| rad68syn                      | 6.16976e-28 | 1.000000 | 6.16976e-28 | 1.000000 |
| rad68anti                     | 4.99419e-28 | 1.000000 | 4.99419e-28 | 1.000000 |
| rad9                          | 3.50325e-28 | 1.000000 | 3.50325e-28 | 1.000000 |
| rad47                         | 6.48299e-29 | 1.000000 | 6.48299e-29 | 1.000000 |
| rad33                         | 3.77688e-29 | 1.000000 | 3.77688e-29 | 1.000000 |
| rad14                         | 2.03612e-29 | 1.000000 | 2.03612e-29 | 1.000000 |
| rad27                         | 1.59554e-29 | 1.000000 | 1.59554e-29 | 1.000000 |
| rad25                         | 1.37121e-29 | 1.000000 | 1.37121e-29 | 1.000000 |
| rad15                         | 1.52920e-31 | 1.000000 | 1.52920e-31 | 1.000000 |

|           |             |         |             |         |
|-----------|-------------|---------|-------------|---------|
| rad19anti | 1.46854e-31 | 1.00000 | 1.46854e-31 | 1.00000 |
| rad23     | 7.54390e-32 | 1.00000 | 7.54390e-32 | 1.00000 |
| rad40syn  | 1.64572e-32 | 1.00000 | 1.64572e-32 | 1.00000 |
| rad40anti | 1.29414e-32 | 1.00000 | 1.29414e-32 | 1.00000 |
| rad5      | 1.11793e-32 | 1.00000 | 1.11793e-32 | 1.00000 |
| rad73     | 1.92320e-33 | 1.00000 | 1.92320e-33 | 1.00000 |
| rad45     | 6.58328e-34 | 1.00000 | 6.58328e-34 | 1.00000 |
| rad31     | 5.73086e-34 | 1.00000 | 5.73086e-34 | 1.00000 |
| rad20     | 1.32203e-34 | 1.00000 | 1.32203e-34 | 1.00000 |
| rad21     | 9.85708e-35 | 1.00000 | 9.85708e-35 | 1.00000 |
| rad22     | 4.64837e-35 | 1.00000 | 4.64837e-35 | 1.00000 |
| PAH8+H    | 4.13569e-35 | 1.00000 | 4.13569e-35 | 1.00000 |
| rad36     | 4.03385e-35 | 1.00000 | 4.03385e-35 | 1.00000 |
| rad12     | 1.72046e-36 | 1.00000 | 1.72046e-36 | 1.00000 |
| rad18     | 6.40388e-37 | 1.00000 | 6.40388e-37 | 1.00000 |
| rad71     | 1.32206e-38 | 1.00000 | 1.32206e-38 | 1.00000 |
| rad19syn  | 9.31466e-41 | 1.00000 | 9.31466e-41 | 1.00000 |
| rad24     | 1.65741e-41 | 1.00000 | 1.65741e-41 | 1.00000 |
| rad8      | 4.02439e-62 | 1.00000 | 4.02439e-62 | 1.00000 |

0.100000000E-02 Pa, 130.000000 K

| Rate constant             | True (fraction)        | Effective (fraction)   |
|---------------------------|------------------------|------------------------|
| Total                     | 3.81236e-15 (1.00 )    | 3.81236e-15 (1.00 )    |
| Formation of rad19        | 3.81236e-15 (1.000 )   | 3.81236e-15 (1.000 )   |
| H-abstraction to cyc2enyl | 1.44825e-21 (3.80e-07) | 1.44825e-21 (3.80e-07) |
| H-abstraction to cyclenyl | 2.94348e-27 (7.72e-13) | 2.94348e-27 (7.72e-13) |

| species                       | PYtrue      | Cumul    | PYeffective | Cumul    |
|-------------------------------|-------------|----------|-------------|----------|
| Indene+H                      | 0.999713    | 0.999713 | 0.999713    | 0.999713 |
| PhCHCCH2+H                    | 0.000272880 | 0.999986 | 0.000272880 | 0.999986 |
| PhCCH+CH3                     | 4.80144e-06 | 0.999990 | 4.80144e-06 | 0.999990 |
| C2H2+PhCH2                    | 3.57941e-06 | 0.999994 | 3.57941e-06 | 0.999994 |
| PhCCCH3+H                     | 2.76566e-06 | 0.999997 | 2.76566e-06 | 0.999997 |
| Ph+MeAc                       | 2.16666e-06 | 0.999999 | 2.16666e-06 | 0.999999 |
| rad67                         | 6.46532e-07 | 0.999999 | 6.46532e-07 | 0.999999 |
| Benzene+cycloprop-2-enylidene | 3.79882e-07 | 1.000000 | 3.79882e-07 | 1.000000 |
| rad35                         | 2.82677e-07 | 1.000000 | 2.82677e-07 | 1.000000 |
| Ph+Allene                     | 2.10124e-07 | 1.000000 | 2.10124e-07 | 1.000000 |
| PhCH2CCH+H                    | 2.74344e-08 | 1.000000 | 2.74344e-08 | 1.000000 |
| PAH7+H                        | 2.61124e-08 | 1.000000 | 2.61124e-08 | 1.000000 |
| rad39                         | 7.36957e-09 | 1.000000 | 7.36957e-09 | 1.000000 |
| rad37                         | 6.93313e-09 | 1.000000 | 6.93313e-09 | 1.000000 |
| rad30                         | 5.32324e-09 | 1.000000 | 5.32324e-09 | 1.000000 |
| PAH9+H                        | 3.79144e-10 | 1.000000 | 3.79144e-10 | 1.000000 |
| rad38                         | 1.66010e-10 | 1.000000 | 1.66010e-10 | 1.000000 |
| rad60syn                      | 2.61039e-11 | 1.000000 | 2.61039e-11 | 1.000000 |
| rad60anti                     | 1.28846e-11 | 1.000000 | 1.28846e-11 | 1.000000 |
| PAH10+CH3                     | 1.27166e-11 | 1.000000 | 1.27166e-11 | 1.000000 |
| PAH3+H                        | 1.21009e-11 | 1.000000 | 1.21009e-11 | 1.000000 |
| rad46                         | 1.03098e-11 | 1.000000 | 1.03098e-11 | 1.000000 |
| PhcycC3H3_A+H                 | 2.92359e-12 | 1.000000 | 2.92359e-12 | 1.000000 |
| rad59                         | 2.45271e-12 | 1.000000 | 2.45271e-12 | 1.000000 |
| Benzene+cycloprop-1-enylidene | 7.72089e-13 | 1.000000 | 7.72089e-13 | 1.000000 |
| rad43                         | 5.40121e-13 | 1.000000 | 5.40121e-13 | 1.000000 |
| rad54                         | 4.67899e-13 | 1.000000 | 4.67899e-13 | 1.000000 |
| rad62                         | 1.18529e-13 | 1.000000 | 1.18529e-13 | 1.000000 |
| rad50                         | 8.44992e-14 | 1.000000 | 8.44992e-14 | 1.000000 |
| Phenyl+cycC3H4                | 1.18041e-14 | 1.000000 | 0.000000    | 1.000000 |
| rad70                         | 9.23356e-15 | 1.000000 | 9.23356e-15 | 1.000000 |
| rad55                         | 4.08547e-15 | 1.000000 | 4.08547e-15 | 1.000000 |
| PAH1+H                        | 2.48280e-15 | 1.000000 | 2.48280e-15 | 1.000000 |
| PhcycC3H3_B+H                 | 8.71415e-16 | 1.000000 | 8.71415e-16 | 1.000000 |
| rad52                         | 6.31731e-16 | 1.000000 | 6.31731e-16 | 1.000000 |
| rad58                         | 2.46704e-16 | 1.000000 | 2.46704e-16 | 1.000000 |
| rad51                         | 1.87955e-16 | 1.000000 | 1.87955e-16 | 1.000000 |
| rad34                         | 1.33508e-16 | 1.000000 | 1.33508e-16 | 1.000000 |
| rad41                         | 2.28968e-17 | 1.000000 | 2.28968e-17 | 1.000000 |
| rad42                         | 1.85451e-17 | 1.000000 | 1.85451e-17 | 1.000000 |
| rad65                         | 4.08901e-18 | 1.000000 | 4.08901e-18 | 1.000000 |
| rad6                          | 3.32340e-20 | 1.000000 | 3.32340e-20 | 1.000000 |
| rad53                         | 1.20353e-20 | 1.000000 | 1.20353e-20 | 1.000000 |
| rad64                         | 1.00095e-21 | 1.000000 | 1.00095e-21 | 1.000000 |
| rad28                         | 3.07021e-23 | 1.000000 | 3.07021e-23 | 1.000000 |
| rad2                          | 1.80578e-23 | 1.000000 | 1.80578e-23 | 1.000000 |
| rad61                         | 6.20127e-24 | 1.000000 | 6.20127e-24 | 1.000000 |
| rad26                         | 3.85588e-24 | 1.000000 | 3.85588e-24 | 1.000000 |
| rad7                          | 2.53188e-24 | 1.000000 | 2.53188e-24 | 1.000000 |

|           |             |         |             |         |
|-----------|-------------|---------|-------------|---------|
| rad1      | 1.17306e-24 | 1.00000 | 1.17306e-24 | 1.00000 |
| rad10     | 9.31364e-25 | 1.00000 | 9.31364e-25 | 1.00000 |
| rad11     | 6.29105e-25 | 1.00000 | 6.29105e-25 | 1.00000 |
| rad3      | 1.14421e-25 | 1.00000 | 1.14421e-25 | 1.00000 |
| rad56     | 1.06300e-25 | 1.00000 | 1.06300e-25 | 1.00000 |
| rad4      | 5.81762e-26 | 1.00000 | 5.81762e-26 | 1.00000 |
| rad13     | 1.35339e-26 | 1.00000 | 1.35339e-26 | 1.00000 |
| rad68syn  | 6.24402e-27 | 1.00000 | 6.24402e-27 | 1.00000 |
| rad68anti | 5.02676e-27 | 1.00000 | 5.02676e-27 | 1.00000 |
| rad9      | 3.18733e-28 | 1.00000 | 3.18733e-28 | 1.00000 |
| rad47     | 6.28684e-29 | 1.00000 | 6.28684e-29 | 1.00000 |
| rad33     | 2.56327e-29 | 1.00000 | 2.56327e-29 | 1.00000 |
| rad14     | 1.38231e-29 | 1.00000 | 1.38231e-29 | 1.00000 |
| rad27     | 1.07703e-29 | 1.00000 | 1.07703e-29 | 1.00000 |
| rad25     | 9.31697e-30 | 1.00000 | 9.31697e-30 | 1.00000 |
| rad40syn  | 4.43597e-31 | 1.00000 | 4.43597e-31 | 1.00000 |
| rad40anti | 3.49253e-31 | 1.00000 | 3.49253e-31 | 1.00000 |
| rad19anti | 2.96901e-31 | 1.00000 | 2.96901e-31 | 1.00000 |
| rad15     | 1.39343e-31 | 1.00000 | 1.39343e-31 | 1.00000 |
| rad23     | 4.36839e-32 | 1.00000 | 4.36839e-32 | 1.00000 |
| rad73     | 3.97373e-32 | 1.00000 | 3.97373e-32 | 1.00000 |
| rad5      | 9.18893e-33 | 1.00000 | 9.18893e-33 | 1.00000 |
| PAH8+H    | 2.25810e-33 | 1.00000 | 2.25810e-33 | 1.00000 |
| rad31     | 4.00270e-34 | 1.00000 | 4.00270e-34 | 1.00000 |
| rad45     | 3.78900e-34 | 1.00000 | 3.78900e-34 | 1.00000 |
| rad20     | 9.48417e-35 | 1.00000 | 9.48417e-35 | 1.00000 |
| rad21     | 7.08753e-35 | 1.00000 | 7.08753e-35 | 1.00000 |
| rad22     | 2.79701e-35 | 1.00000 | 2.79701e-35 | 1.00000 |
| rad36     | 2.32331e-35 | 1.00000 | 2.32331e-35 | 1.00000 |
| rad12     | 1.57678e-36 | 1.00000 | 1.57678e-36 | 1.00000 |
| rad71     | 1.12261e-36 | 1.00000 | 1.12261e-36 | 1.00000 |
| rad18     | 4.55331e-37 | 1.00000 | 4.55331e-37 | 1.00000 |
| rad19syn  | 2.10397e-40 | 1.00000 | 2.10397e-40 | 1.00000 |
| rad24     | 1.06282e-41 | 1.00000 | 1.06282e-41 | 1.00000 |
| rad8      | 5.77159e-62 | 1.00000 | 5.77159e-62 | 1.00000 |

0.100000000E-02 Pa, 140.000000 K

=====

| Rate constant             | True (fraction)        | Effective (fraction)   |
|---------------------------|------------------------|------------------------|
| Total                     | 4.99515e-15 (1.00 )    | 4.99515e-15 (1.00 )    |
| Formation of rad19        | 4.99514e-15 (1.000 )   | 4.99514e-15 (1.000 )   |
| H-abstraction to cyc2enyl | 5.62488e-21 (1.13e-06) | 5.62488e-21 (1.13e-06) |
| H-abstraction to cyclenyl | 3.00047e-26 (6.01e-12) | 3.00047e-26 (6.01e-12) |

| species                       | PYtrue      | Cumul    | PYeffective | Cumul    |
|-------------------------------|-------------|----------|-------------|----------|
| Indene+H                      | 0.999703    | 0.999703 | 0.999703    | 0.999703 |
| PhCHCCH2+H                    | 0.000280916 | 0.999984 | 0.000280916 | 0.999984 |
| PhCCH+CH3                     | 4.95283e-06 | 0.999989 | 4.95283e-06 | 0.999989 |
| C2H2+PhCH2                    | 3.71755e-06 | 0.999992 | 3.71755e-06 | 0.999992 |
| PhCCCH3+H                     | 2.86257e-06 | 0.999995 | 2.86257e-06 | 0.999995 |
| Ph+MeAc                       | 2.26003e-06 | 0.999998 | 2.26003e-06 | 0.999998 |
| Benzene+cycloprop-2-enylidene | 1.12607e-06 | 0.999999 | 1.12607e-06 | 0.999999 |
| rad67                         | 6.73018e-07 | 0.999999 | 6.73018e-07 | 0.999999 |
| rad35                         | 2.93768e-07 | 1.000000 | 2.93768e-07 | 1.000000 |
| Ph+Allene                     | 2.22609e-07 | 1.000000 | 2.22609e-07 | 1.000000 |
| PhCH2CCH+H                    | 2.93473e-08 | 1.000000 | 2.93473e-08 | 1.000000 |
| PAH7+H                        | 2.74267e-08 | 1.000000 | 2.74267e-08 | 1.000000 |
| rad39                         | 7.74052e-09 | 1.000000 | 7.74052e-09 | 1.000000 |
| rad37                         | 7.30363e-09 | 1.000000 | 7.30363e-09 | 1.000000 |
| rad30                         | 5.53879e-09 | 1.000000 | 5.53879e-09 | 1.000000 |
| PAH9+H                        | 3.99424e-10 | 1.000000 | 3.99424e-10 | 1.000000 |
| rad38                         | 1.75863e-10 | 1.000000 | 1.75863e-10 | 1.000000 |
| rad60syn                      | 2.76137e-11 | 1.000000 | 2.76137e-11 | 1.000000 |
| PAH10+CH3                     | 1.41936e-11 | 1.000000 | 1.41936e-11 | 1.000000 |
| rad60anti                     | 1.36500e-11 | 1.000000 | 1.36500e-11 | 1.000000 |
| PAH3+H                        | 1.30737e-11 | 1.000000 | 1.30737e-11 | 1.000000 |
| rad46                         | 1.09682e-11 | 1.000000 | 1.09682e-11 | 1.000000 |
| Benzene+cycloprop-1-enylidene | 6.00677e-12 | 1.000000 | 6.00677e-12 | 1.000000 |
| PhcycC3H3_A+H                 | 3.69541e-12 | 1.000000 | 3.69541e-12 | 1.000000 |
| rad59                         | 2.64115e-12 | 1.000000 | 2.64115e-12 | 1.000000 |
| rad43                         | 5.94418e-13 | 1.000000 | 5.94418e-13 | 1.000000 |
| rad54                         | 5.21659e-13 | 1.000000 | 5.21659e-13 | 1.000000 |
| rad62                         | 1.30776e-13 | 1.000000 | 1.30776e-13 | 1.000000 |
| rad50                         | 9.26626e-14 | 1.000000 | 9.26626e-14 | 1.000000 |
| Phenyl+cycC3H4                | 1.75978e-14 | 1.000000 | 0.000000    | 1.000000 |
| rad70                         | 1.06545e-14 | 1.000000 | 1.06545e-14 | 1.000000 |
| rad55                         | 4.71703e-15 | 1.000000 | 4.71703e-15 | 1.000000 |
| PAH1+H                        | 3.01953e-15 | 1.000000 | 3.01953e-15 | 1.000000 |

|               |             |          |             |          |
|---------------|-------------|----------|-------------|----------|
| PhcycC3H3_B+H | 1.95210e-15 | 1.000000 | 1.95210e-15 | 1.000000 |
| rad52         | 7.09155e-16 | 1.000000 | 7.09155e-16 | 1.000000 |
| rad58         | 2.89078e-16 | 1.000000 | 2.89078e-16 | 1.000000 |
| rad51         | 2.17121e-16 | 1.000000 | 2.17121e-16 | 1.000000 |
| rad34         | 1.62893e-16 | 1.000000 | 1.62893e-16 | 1.000000 |
| rad41         | 2.94343e-17 | 1.000000 | 2.94343e-17 | 1.000000 |
| rad42         | 2.32454e-17 | 1.000000 | 2.32454e-17 | 1.000000 |
| rad65         | 4.78738e-18 | 1.000000 | 4.78738e-18 | 1.000000 |
| rad53         | 2.52777e-20 | 1.000000 | 2.52777e-20 | 1.000000 |
| rad6          | 2.32001e-20 | 1.000000 | 2.32001e-20 | 1.000000 |
| rad64         | 2.61932e-21 | 1.000000 | 2.61932e-21 | 1.000000 |
| rad61         | 3.06683e-23 | 1.000000 | 3.06683e-23 | 1.000000 |
| rad28         | 2.15445e-23 | 1.000000 | 2.15445e-23 | 1.000000 |
| rad2          | 1.25286e-23 | 1.000000 | 1.25286e-23 | 1.000000 |
| rad26         | 2.71521e-24 | 1.000000 | 2.71521e-24 | 1.000000 |
| rad7          | 1.76525e-24 | 1.000000 | 1.76525e-24 | 1.000000 |
| rad1          | 8.17624e-25 | 1.000000 | 8.17624e-25 | 1.000000 |
| rad56         | 6.79942e-25 | 1.000000 | 6.79942e-25 | 1.000000 |
| rad10         | 6.45944e-25 | 1.000000 | 6.45944e-25 | 1.000000 |
| rad11         | 4.38659e-25 | 1.000000 | 4.38659e-25 | 1.000000 |
| rad3          | 7.93738e-26 | 1.000000 | 7.93738e-26 | 1.000000 |
| rad68syn      | 4.60221e-26 | 1.000000 | 4.60221e-26 | 1.000000 |
| rad4          | 4.04046e-26 | 1.000000 | 4.04046e-26 | 1.000000 |
| rad68anti     | 3.68618e-26 | 1.000000 | 3.68618e-26 | 1.000000 |
| rad13         | 9.47543e-27 | 1.000000 | 9.47543e-27 | 1.000000 |
| rad9          | 3.02276e-28 | 1.000000 | 3.02276e-28 | 1.000000 |
| rad47         | 6.17640e-29 | 1.000000 | 6.17640e-29 | 1.000000 |
| rad33         | 1.79700e-29 | 1.000000 | 1.79700e-29 | 1.000000 |
| rad14         | 9.69958e-30 | 1.000000 | 9.69958e-30 | 1.000000 |
| rad40syn      | 7.53646e-30 | 1.000000 | 7.53646e-30 | 1.000000 |
| rad27         | 7.51611e-30 | 1.000000 | 7.51611e-30 | 1.000000 |
| rad25         | 6.53999e-30 | 1.000000 | 6.53999e-30 | 1.000000 |
| rad40anti     | 5.95179e-30 | 1.000000 | 5.95179e-30 | 1.000000 |
| rad19anti     | 6.36015e-31 | 1.000000 | 6.36015e-31 | 1.000000 |
| rad73         | 5.47734e-31 | 1.000000 | 5.47734e-31 | 1.000000 |
| rad15         | 1.32360e-31 | 1.000000 | 1.32360e-31 | 1.000000 |
| PAH8+H        | 6.68131e-32 | 1.000000 | 6.68131e-32 | 1.000000 |
| rad23         | 2.66696e-32 | 1.000000 | 2.66696e-32 | 1.000000 |
| rad5          | 7.68732e-33 | 1.000000 | 7.68732e-33 | 1.000000 |
| rad31         | 2.93658e-34 | 1.000000 | 2.93658e-34 | 1.000000 |
| rad45         | 2.30102e-34 | 1.000000 | 2.30102e-34 | 1.000000 |
| rad20         | 7.04304e-35 | 1.000000 | 7.04304e-35 | 1.000000 |
| rad21         | 5.27591e-35 | 1.000000 | 5.27591e-35 | 1.000000 |
| rad71         | 4.16913e-35 | 1.000000 | 4.16913e-35 | 1.000000 |
| rad22         | 1.77114e-35 | 1.000000 | 1.77114e-35 | 1.000000 |
| rad36         | 1.41224e-35 | 1.000000 | 1.41224e-35 | 1.000000 |
| rad12         | 1.50698e-36 | 1.000000 | 1.50698e-36 | 1.000000 |
| rad18         | 3.35482e-37 | 1.000000 | 3.35482e-37 | 1.000000 |
| rad19syn      | 4.98180e-40 | 1.000000 | 4.98180e-40 | 1.000000 |
| rad24         | 7.27050e-42 | 1.000000 | 7.27050e-42 | 1.000000 |
| rad8          | 8.48437e-62 | 1.000000 | 8.48437e-62 | 1.000000 |

0.100000000E-02 Pa, 150.000000 K

=====

| Rate constant             | True (fraction)        | Effective (fraction)   |
|---------------------------|------------------------|------------------------|
| Total                     | 6.34137e-15 (1.00 )    | 6.34137e-15 (1.00 )    |
| Formation of rad19        | 6.34135e-15 (1.000 )   | 6.34135e-15 (1.000 )   |
| H-abstraction to cyc2enyl | 1.81685e-20 (2.87e-06) | 1.81685e-20 (2.87e-06) |
| H-abstraction to cyclenyl | 2.23765e-25 (3.53e-11) | 2.23765e-25 (3.53e-11) |

| species                       | PYtrue      | Cumul    | PYeffective | Cumul    |
|-------------------------------|-------------|----------|-------------|----------|
| Indene+H                      | 0.999692    | 0.999692 | 0.999692    | 0.999692 |
| PhCHCCH2+H                    | 0.000289591 | 0.999982 | 0.000289591 | 0.999982 |
| PhCCH+CH3                     | 5.11613e-06 | 0.999987 | 5.11613e-06 | 0.999987 |
| C2H2+PhCH2                    | 3.86813e-06 | 0.999991 | 3.86813e-06 | 0.999991 |
| PhCCCH3+H                     | 2.96767e-06 | 0.999994 | 2.96767e-06 | 0.999994 |
| Benzene+cycloprop-2-enylidene | 2.86508e-06 | 0.999997 | 2.86508e-06 | 0.999997 |
| Ph+MeAc                       | 2.36221e-06 | 0.999999 | 2.36221e-06 | 0.999999 |
| rad67                         | 7.01963e-07 | 1.000000 | 7.01963e-07 | 1.000000 |
| rad35                         | 3.05866e-07 | 1.000000 | 3.05866e-07 | 1.000000 |
| Ph+Allene                     | 2.36549e-07 | 1.000000 | 2.36549e-07 | 1.000000 |
| PhCH2CCH+H                    | 3.15070e-08 | 1.000000 | 3.15070e-08 | 1.000000 |
| PAH7+H                        | 2.88788e-08 | 1.000000 | 2.88788e-08 | 1.000000 |
| rad39                         | 8.15023e-09 | 1.000000 | 8.15023e-09 | 1.000000 |
| rad37                         | 7.71432e-09 | 1.000000 | 7.71432e-09 | 1.000000 |
| rad30                         | 5.77461e-09 | 1.000000 | 5.77461e-09 | 1.000000 |
| PAH9+H                        | 4.21956e-10 | 1.000000 | 4.21956e-10 | 1.000000 |
| rad38                         | 1.86897e-10 | 1.000000 | 1.86897e-10 | 1.000000 |

|                               |             |         |             |         |
|-------------------------------|-------------|---------|-------------|---------|
| Benzene+cycloprop-1-enylidene | 3.52865e-11 | 1.00000 | 3.52865e-11 | 1.00000 |
| rad60syn                      | 2.92981e-11 | 1.00000 | 2.92981e-11 | 1.00000 |
| PAH10+CH3                     | 1.59400e-11 | 1.00000 | 1.59400e-11 | 1.00000 |
| rad60anti                     | 1.45055e-11 | 1.00000 | 1.45055e-11 | 1.00000 |
| PAH3+H                        | 1.41861e-11 | 1.00000 | 1.41861e-11 | 1.00000 |
| rad46                         | 1.17086e-11 | 1.00000 | 1.17086e-11 | 1.00000 |
| PhcycC3H3_A+H                 | 4.70692e-12 | 1.00000 | 4.70692e-12 | 1.00000 |
| rad59                         | 2.85573e-12 | 1.00000 | 2.85573e-12 | 1.00000 |
| rad43                         | 6.57492e-13 | 1.00000 | 6.57492e-13 | 1.00000 |
| rad54                         | 5.85185e-13 | 1.00000 | 5.85185e-13 | 1.00000 |
| rad62                         | 1.45014e-13 | 1.00000 | 1.45014e-13 | 1.00000 |
| rad50                         | 1.02173e-13 | 1.00000 | 1.02173e-13 | 1.00000 |
| Phenyl+cycC3H4                | 2.61242e-14 | 1.00000 | 0.00000     | 1.00000 |
| rad70                         | 1.23938e-14 | 1.00000 | 1.23938e-14 | 1.00000 |
| rad55                         | 5.49004e-15 | 1.00000 | 5.49004e-15 | 1.00000 |
| PhcycC3H3_B+H                 | 4.08980e-15 | 1.00000 | 4.08980e-15 | 1.00000 |
| PAH1+H                        | 3.70976e-15 | 1.00000 | 3.70976e-15 | 1.00000 |
| rad52                         | 8.01737e-16 | 1.00000 | 8.01737e-16 | 1.00000 |
| rad58                         | 3.41803e-16 | 1.00000 | 3.41803e-16 | 1.00000 |
| rad51                         | 2.53088e-16 | 1.00000 | 2.53088e-16 | 1.00000 |
| rad34                         | 2.00804e-16 | 1.00000 | 2.00804e-16 | 1.00000 |
| rad41                         | 3.81659e-17 | 1.00000 | 3.81659e-17 | 1.00000 |
| rad42                         | 2.93783e-17 | 1.00000 | 2.93783e-17 | 1.00000 |
| rad65                         | 5.65957e-18 | 1.00000 | 5.65957e-18 | 1.00000 |
| rad53                         | 5.01851e-20 | 1.00000 | 5.01851e-20 | 1.00000 |
| rad6                          | 1.66494e-20 | 1.00000 | 1.66494e-20 | 1.00000 |
| rad64                         | 6.27232e-21 | 1.00000 | 6.27232e-21 | 1.00000 |
| rad61                         | 1.25961e-22 | 1.00000 | 1.25961e-22 | 1.00000 |
| rad28                         | 1.55381e-23 | 1.00000 | 1.55381e-23 | 1.00000 |
| rad2                          | 8.94445e-24 | 1.00000 | 8.94445e-24 | 1.00000 |
| rad56                         | 3.47105e-24 | 1.00000 | 3.47105e-24 | 1.00000 |
| rad26                         | 1.96971e-24 | 1.00000 | 1.96971e-24 | 1.00000 |
| rad7                          | 1.26567e-24 | 1.00000 | 1.26567e-24 | 1.00000 |
| rad1                          | 5.86655e-25 | 1.00000 | 5.86655e-25 | 1.00000 |
| rad10                         | 4.61079e-25 | 1.00000 | 4.61079e-25 | 1.00000 |
| rad11                         | 3.14559e-25 | 1.00000 | 3.14559e-25 | 1.00000 |
| rad68syn                      | 2.64314e-25 | 1.00000 | 2.64314e-25 | 1.00000 |
| rad68anti                     | 2.10625e-25 | 1.00000 | 2.10625e-25 | 1.00000 |
| rad3                          | 5.66613e-26 | 1.00000 | 5.66613e-26 | 1.00000 |
| rad4                          | 2.88807e-26 | 1.00000 | 2.88807e-26 | 1.00000 |
| rad13                         | 6.82072e-27 | 1.00000 | 6.82072e-27 | 1.00000 |
| rad9                          | 2.97822e-28 | 1.00000 | 2.97822e-28 | 1.00000 |
| rad40syn                      | 8.88006e-29 | 1.00000 | 8.88006e-29 | 1.00000 |
| rad40anti                     | 7.03992e-29 | 1.00000 | 7.03992e-29 | 1.00000 |
| rad47                         | 6.14414e-29 | 1.00000 | 6.14414e-29 | 1.00000 |
| rad33                         | 1.29534e-29 | 1.00000 | 1.29534e-29 | 1.00000 |
| rad14                         | 7.00327e-30 | 1.00000 | 7.00327e-30 | 1.00000 |
| rad73                         | 5.47693e-30 | 1.00000 | 5.47693e-30 | 1.00000 |
| rad27                         | 5.39766e-30 | 1.00000 | 5.39766e-30 | 1.00000 |
| rad25                         | 4.72091e-30 | 1.00000 | 4.72091e-30 | 1.00000 |
| rad19anti                     | 1.44121e-30 | 1.00000 | 1.44121e-30 | 1.00000 |
| PAH8+H                        | 1.26386e-30 | 1.00000 | 1.26386e-30 | 1.00000 |
| rad15                         | 1.30630e-31 | 1.00000 | 1.30630e-31 | 1.00000 |
| rad23                         | 1.70463e-32 | 1.00000 | 1.70463e-32 | 1.00000 |
| rad5                          | 6.52673e-33 | 1.00000 | 6.52673e-33 | 1.00000 |
| rad71                         | 9.41810e-34 | 1.00000 | 9.41810e-34 | 1.00000 |
| rad31                         | 2.29568e-34 | 1.00000 | 2.29568e-34 | 1.00000 |
| rad45                         | 1.46397e-34 | 1.00000 | 1.46397e-34 | 1.00000 |
| rad20                         | 5.38891e-35 | 1.00000 | 5.38891e-35 | 1.00000 |
| rad21                         | 4.04705e-35 | 1.00000 | 4.04705e-35 | 1.00000 |
| rad22                         | 1.17154e-35 | 1.00000 | 1.17154e-35 | 1.00000 |
| rad36                         | 8.99561e-36 | 1.00000 | 8.99561e-36 | 1.00000 |
| rad12                         | 1.49701e-36 | 1.00000 | 1.49701e-36 | 1.00000 |
| rad18                         | 2.54857e-37 | 1.00000 | 2.54857e-37 | 1.00000 |
| rad19syn                      | 1.23836e-39 | 1.00000 | 1.23836e-39 | 1.00000 |
| rad24                         | 5.26595e-42 | 1.00000 | 5.26595e-42 | 1.00000 |
| rad8                          | 1.27662e-61 | 1.00000 | 1.27662e-61 | 1.00000 |

0.100000000E-02 Pa, 160.000000 K

=====

| Rate constant             | True (fraction)        | Effective (fraction)   |             |          |
|---------------------------|------------------------|------------------------|-------------|----------|
| Total                     | 7.84423e-15 (1.00 )    | 7.84423e-15 (1.00 )    |             |          |
| Formation of rad19        | 7.84418e-15 (1.000 )   | 7.84418e-15 (1.000 )   |             |          |
| H-abstraction to cyc2enyl | 5.05321e-20 (6.44e-06) | 5.05321e-20 (6.44e-06) |             |          |
| H-abstraction to cyclenyl | 1.29479e-24 (1.65e-10) | 1.29479e-24 (1.65e-10) |             |          |
| species                   | PYtrue                 | Cumul                  | PYeffective | Cumul    |
| Indene+H                  | 0.999679               | 0.999679               | 0.999679    | 0.999679 |

|                               |             |          |             |          |
|-------------------------------|-------------|----------|-------------|----------|
| PhCHCCH2+H                    | 0.000298980 | 0.999978 | 0.000298980 | 0.999978 |
| Benzene+cycloprop-2-enylidene | 6.44194e-06 | 0.999984 | 6.44194e-06 | 0.999984 |
| PhCCH+CH3                     | 5.29266e-06 | 0.999989 | 5.29266e-06 | 0.999989 |
| C2H2+PhCH2                    | 4.03278e-06 | 0.999993 | 4.03278e-06 | 0.999993 |
| PhCCCH3+H                     | 3.08197e-06 | 0.999996 | 3.08197e-06 | 0.999996 |
| Ph+MeAc                       | 2.47437e-06 | 0.999999 | 2.47437e-06 | 0.999999 |
| rad67                         | 7.33692e-07 | 1.000000 | 7.33692e-07 | 1.000000 |
| rad35                         | 3.19104e-07 | 1.000000 | 3.19104e-07 | 1.000000 |
| Ph+Allene                     | 2.52179e-07 | 1.000000 | 2.52179e-07 | 1.000000 |
| PhCH2CCH+H                    | 3.39570e-08 | 1.000000 | 3.39570e-08 | 1.000000 |
| PAH7+H                        | 3.04893e-08 | 1.000000 | 3.04893e-08 | 1.000000 |
| rad39                         | 8.60430e-09 | 1.000000 | 8.60430e-09 | 1.000000 |
| rad37                         | 8.17124e-09 | 1.000000 | 8.17124e-09 | 1.000000 |
| rad30                         | 6.03343e-09 | 1.000000 | 6.03343e-09 | 1.000000 |
| PAH9+H                        | 4.47093e-10 | 1.000000 | 4.47093e-10 | 1.000000 |
| rad38                         | 1.99310e-10 | 1.000000 | 1.99310e-10 | 1.000000 |
| Benzene+cycloprop-1-enylidene | 1.65062e-10 | 1.000000 | 1.65062e-10 | 1.000000 |
| rad60syn                      | 3.11852e-11 | 1.000000 | 3.11852e-11 | 1.000000 |
| PAH10+CH3                     | 1.80187e-11 | 1.000000 | 1.80187e-11 | 1.000000 |
| rad60anti                     | 1.54656e-11 | 1.000000 | 1.54656e-11 | 1.000000 |
| PAH3+H                        | 1.54648e-11 | 1.000000 | 1.54648e-11 | 1.000000 |
| rad46                         | 1.25447e-11 | 1.000000 | 1.25447e-11 | 1.000000 |
| PhcycC3H3_A+H                 | 6.04091e-12 | 1.000000 | 6.04091e-12 | 1.000000 |
| rad59                         | 3.10136e-12 | 1.000000 | 3.10136e-12 | 1.000000 |
| rad43                         | 7.31176e-13 | 1.000000 | 7.31176e-13 | 1.000000 |
| rad54                         | 6.60760e-13 | 1.000000 | 6.60760e-13 | 1.000000 |
| rad62                         | 1.61655e-13 | 1.000000 | 1.61655e-13 | 1.000000 |
| rad50                         | 1.13324e-13 | 1.000000 | 1.13324e-13 | 1.000000 |
| Phenyl+cycC3H4                | 3.86829e-14 | 1.000000 | 0.000000    | 1.000000 |
| rad70                         | 1.45398e-14 | 1.000000 | 1.45398e-14 | 1.000000 |
| PhcycC3H3_B+H                 | 8.12740e-15 | 1.000000 | 8.12740e-15 | 1.000000 |
| rad55                         | 6.44369e-15 | 1.000000 | 6.44369e-15 | 1.000000 |
| PAH1+H                        | 4.60544e-15 | 1.000000 | 4.60544e-15 | 1.000000 |
| rad52                         | 9.13328e-16 | 1.000000 | 9.13328e-16 | 1.000000 |
| rad58                         | 4.07987e-16 | 1.000000 | 4.07987e-16 | 1.000000 |
| rad51                         | 2.97864e-16 | 1.000000 | 2.97864e-16 | 1.000000 |
| rad34                         | 2.50166e-16 | 1.000000 | 2.50166e-16 | 1.000000 |
| rad41                         | 4.99133e-17 | 1.000000 | 4.99133e-17 | 1.000000 |
| rad42                         | 3.74343e-17 | 1.000000 | 3.74343e-17 | 1.000000 |
| rad65                         | 6.75947e-18 | 1.000000 | 6.75947e-18 | 1.000000 |
| rad53                         | 9.55101e-20 | 1.000000 | 9.55101e-20 | 1.000000 |
| rad64                         | 1.40150e-20 | 1.000000 | 1.40150e-20 | 1.000000 |
| rad6                          | 1.22417e-20 | 1.000000 | 1.22417e-20 | 1.000000 |
| rad61                         | 4.46322e-22 | 1.000000 | 4.46322e-22 | 1.000000 |
| rad56                         | 1.48061e-23 | 1.000000 | 1.48061e-23 | 1.000000 |
| rad28                         | 1.14781e-23 | 1.000000 | 1.14781e-23 | 1.000000 |
| rad2                          | 6.54937e-24 | 1.000000 | 6.54937e-24 | 1.000000 |
| rad26                         | 1.46831e-24 | 1.000000 | 1.46831e-24 | 1.000000 |
| rad68syn                      | 1.24401e-24 | 1.000000 | 1.24401e-24 | 1.000000 |
| rad68anti                     | 9.86010e-25 | 1.000000 | 9.86010e-25 | 1.000000 |
| rad7                          | 9.30039e-25 | 1.000000 | 9.30039e-25 | 1.000000 |
| rad1                          | 4.31915e-25 | 1.000000 | 4.31915e-25 | 1.000000 |
| rad10                         | 3.37620e-25 | 1.000000 | 3.37620e-25 | 1.000000 |
| rad11                         | 2.31190e-25 | 1.000000 | 2.31190e-25 | 1.000000 |
| rad3                          | 4.14852e-26 | 1.000000 | 4.14852e-26 | 1.000000 |
| rad4                          | 2.11758e-26 | 1.000000 | 2.11758e-26 | 1.000000 |
| rad13                         | 5.03104e-27 | 1.000000 | 5.03104e-27 | 1.000000 |
| rad40syn                      | 7.79808e-28 | 1.000000 | 7.79808e-28 | 1.000000 |
| rad40anti                     | 6.20616e-28 | 1.000000 | 6.20616e-28 | 1.000000 |
| rad9                          | 3.04527e-28 | 1.000000 | 3.04527e-28 | 1.000000 |
| rad47                         | 6.18722e-29 | 1.000000 | 6.18722e-29 | 1.000000 |
| rad73                         | 4.23052e-29 | 1.000000 | 4.23052e-29 | 1.000000 |
| PAH8+H                        | 1.68144e-29 | 1.000000 | 1.68144e-29 | 1.000000 |
| rad33                         | 9.56861e-30 | 1.000000 | 9.56861e-30 | 1.000000 |
| rad14                         | 5.18692e-30 | 1.000000 | 5.18692e-30 | 1.000000 |
| rad27                         | 3.97623e-30 | 1.000000 | 3.97623e-30 | 1.000000 |
| rad25                         | 3.49287e-30 | 1.000000 | 3.49287e-30 | 1.000000 |
| rad19anti                     | 3.44918e-30 | 1.000000 | 3.44918e-30 | 1.000000 |
| rad15                         | 1.33804e-31 | 1.000000 | 1.33804e-31 | 1.000000 |
| rad71                         | 1.46136e-32 | 1.000000 | 1.46136e-32 | 1.000000 |
| rad23                         | 1.13498e-32 | 1.000000 | 1.13498e-32 | 1.000000 |
| rad5                          | 5.61094e-33 | 1.000000 | 5.61094e-33 | 1.000000 |
| rad31                         | 1.98754e-34 | 1.000000 | 1.98754e-34 | 1.000000 |
| rad45                         | 9.70852e-35 | 1.000000 | 9.70852e-35 | 1.000000 |
| rad20                         | 4.23409e-35 | 1.000000 | 4.23409e-35 | 1.000000 |
| rad21                         | 3.18828e-35 | 1.000000 | 3.18828e-35 | 1.000000 |
| rad22                         | 8.05059e-36 | 1.000000 | 8.05059e-36 | 1.000000 |
| rad36                         | 5.97426e-36 | 1.000000 | 5.97426e-36 | 1.000000 |
| rad12                         | 1.54407e-36 | 1.000000 | 1.54407e-36 | 1.000000 |
| rad18                         | 1.98903e-37 | 1.000000 | 1.98903e-37 | 1.000000 |

|          |             |         |             |         |
|----------|-------------|---------|-------------|---------|
| rad19syn | 3.23538e-39 | 1.00000 | 3.23538e-39 | 1.00000 |
| rad24    | 4.01518e-42 | 1.00000 | 4.01518e-42 | 1.00000 |
| rad8     | 1.96416e-61 | 1.00000 | 1.96416e-61 | 1.00000 |

0.100000000E-02 Pa, 170.000000 K

| Rate constant             | True (fraction)        | Effective (fraction)   |
|---------------------------|------------------------|------------------------|
| Total                     | 9.49598e-15 (1.00 )    | 9.49598e-15 (1.00 )    |
| Formation of rad19        | 9.49586e-15 (1.000 )   | 9.49586e-15 (1.000 )   |
| H-abstraction to cyc2enyl | 1.24279e-19 (1.31e-05) | 1.24279e-19 (1.31e-05) |
| H-abstraction to cyc1enyl | 6.08025e-24 (6.40e-10) | 6.08025e-24 (6.40e-10) |

| species                       | PYtrue      | Cumul    | PYeffective | Cumul    |
|-------------------------------|-------------|----------|-------------|----------|
| Indene+H                      | 0.999661    | 0.999661 | 0.999661    | 0.999661 |
| PhCHCCH2+H                    | 0.000309166 | 0.999970 | 0.000309166 | 0.999970 |
| Benzene+cycloprop-2-enylidene | 1.30875e-05 | 0.999983 | 1.30875e-05 | 0.999983 |
| PhCCH+CH3                     | 5.48390e-06 | 0.999989 | 5.48390e-06 | 0.999989 |
| C2H2+PhCH2                    | 4.21328e-06 | 0.999993 | 4.21328e-06 | 0.999993 |
| PhCCCH3+H                     | 3.20657e-06 | 0.999996 | 3.20657e-06 | 0.999996 |
| Ph+MeAc                       | 2.59785e-06 | 0.999999 | 2.59785e-06 | 0.999999 |
| rad67                         | 7.68570e-07 | 0.999999 | 7.68570e-07 | 0.999999 |
| rad35                         | 3.33629e-07 | 1.000000 | 3.33629e-07 | 1.000000 |
| Ph+Allene                     | 2.69770e-07 | 1.000000 | 2.69770e-07 | 1.000000 |
| PhCH2CCH+H                    | 3.67483e-08 | 1.000000 | 3.67483e-08 | 1.000000 |
| PAH7+H                        | 3.22812e-08 | 1.000000 | 3.22812e-08 | 1.000000 |
| rad39                         | 9.10922e-09 | 1.000000 | 9.10922e-09 | 1.000000 |
| rad37                         | 8.68140e-09 | 1.000000 | 8.68140e-09 | 1.000000 |
| rad30                         | 6.31832e-09 | 1.000000 | 6.31832e-09 | 1.000000 |
| Benzene+cycloprop-1-enylidene | 6.40297e-10 | 1.000000 | 6.40297e-10 | 1.000000 |
| PAH9+H                        | 4.75245e-10 | 1.000000 | 4.75245e-10 | 1.000000 |
| rad38                         | 2.13331e-10 | 1.000000 | 2.13331e-10 | 1.000000 |
| rad60syn                      | 3.33079e-11 | 1.000000 | 3.33079e-11 | 1.000000 |
| PAH10+CH3                     | 2.05088e-11 | 1.000000 | 2.05088e-11 | 1.000000 |
| PAH3+H                        | 1.69426e-11 | 1.000000 | 1.69426e-11 | 1.000000 |
| rad60anti                     | 1.65476e-11 | 1.000000 | 1.65476e-11 | 1.000000 |
| rad46                         | 1.34934e-11 | 1.000000 | 1.34934e-11 | 1.000000 |
| PhcycC3H3_A+H                 | 7.80971e-12 | 1.000000 | 7.80971e-12 | 1.000000 |
| rad59                         | 3.38391e-12 | 1.000000 | 3.38391e-12 | 1.000000 |
| rad43                         | 8.17716e-13 | 1.000000 | 8.17716e-13 | 1.000000 |
| rad54                         | 7.51251e-13 | 1.000000 | 7.51251e-13 | 1.000000 |
| rad62                         | 1.81204e-13 | 1.000000 | 1.81204e-13 | 1.000000 |
| rad50                         | 1.26486e-13 | 1.000000 | 1.26486e-13 | 1.000000 |
| Phenyl+cycC3H4                | 5.71891e-14 | 1.000000 | 0.000000    | 1.000000 |
| rad70                         | 1.72081e-14 | 1.000000 | 1.72081e-14 | 1.000000 |
| PhcycC3H3_B+H                 | 1.54798e-14 | 1.000000 | 1.54798e-14 | 1.000000 |
| rad55                         | 7.62903e-15 | 1.000000 | 7.62903e-15 | 1.000000 |
| PAH1+H                        | 5.77739e-15 | 1.000000 | 5.77739e-15 | 1.000000 |
| rad52                         | 1.04888e-15 | 1.000000 | 1.04888e-15 | 1.000000 |
| rad58                         | 4.91762e-16 | 1.000000 | 4.91762e-16 | 1.000000 |
| rad51                         | 3.54112e-16 | 1.000000 | 3.54112e-16 | 1.000000 |
| rad34                         | 3.14980e-16 | 1.000000 | 3.14980e-16 | 1.000000 |
| rad41                         | 6.58173e-17 | 1.000000 | 6.58173e-17 | 1.000000 |
| rad42                         | 4.80779e-17 | 1.000000 | 4.80779e-17 | 1.000000 |
| rad65                         | 8.15947e-18 | 1.000000 | 8.15947e-18 | 1.000000 |
| rad53                         | 1.75970e-19 | 1.000000 | 1.75970e-19 | 1.000000 |
| rad64                         | 2.96417e-20 | 1.000000 | 2.96417e-20 | 1.000000 |
| rad6                          | 9.20130e-21 | 1.000000 | 9.20130e-21 | 1.000000 |
| rad61                         | 1.40404e-21 | 1.000000 | 1.40404e-21 | 1.000000 |
| rad56                         | 5.46424e-23 | 1.000000 | 5.46424e-23 | 1.000000 |
| rad28                         | 8.66452e-24 | 1.000000 | 8.66452e-24 | 1.000000 |
| rad68syn                      | 4.98549e-24 | 1.000000 | 4.98549e-24 | 1.000000 |
| rad2                          | 4.90869e-24 | 1.000000 | 4.90869e-24 | 1.000000 |
| rad68anti                     | 3.92882e-24 | 1.000000 | 3.92882e-24 | 1.000000 |
| rad26                         | 1.12365e-24 | 1.000000 | 1.12365e-24 | 1.000000 |
| rad7                          | 6.98806e-25 | 1.000000 | 6.98806e-25 | 1.000000 |
| rad1                          | 3.25646e-25 | 1.000000 | 3.25646e-25 | 1.000000 |
| rad10                         | 2.53089e-25 | 1.000000 | 2.53089e-25 | 1.000000 |
| rad11                         | 1.73750e-25 | 1.000000 | 1.73750e-25 | 1.000000 |
| rad3                          | 3.10875e-26 | 1.000000 | 3.10875e-26 | 1.000000 |
| rad4                          | 1.58934e-26 | 1.000000 | 1.58934e-26 | 1.000000 |
| rad40syn                      | 5.38952e-27 | 1.000000 | 5.38952e-27 | 1.000000 |
| rad40anti                     | 4.30385e-27 | 1.000000 | 4.30385e-27 | 1.000000 |
| rad13                         | 3.79402e-27 | 1.000000 | 3.79402e-27 | 1.000000 |
| rad9                          | 3.23880e-28 | 1.000000 | 3.23880e-28 | 1.000000 |
| rad73                         | 2.64760e-28 | 1.000000 | 2.64760e-28 | 1.000000 |
| PAH8+H                        | 1.67786e-28 | 1.000000 | 1.67786e-28 | 1.000000 |
| rad47                         | 6.30689e-29 | 1.000000 | 6.30689e-29 | 1.000000 |
| rad19anti                     | 8.70447e-30 | 1.000000 | 8.70447e-30 | 1.000000 |

|          |             |         |             |         |
|----------|-------------|---------|-------------|---------|
| rad33    | 7.22710e-30 | 1.00000 | 7.22710e-30 | 1.00000 |
| rad14    | 3.93370e-30 | 1.00000 | 3.93370e-30 | 1.00000 |
| rad27    | 2.99881e-30 | 1.00000 | 2.99881e-30 | 1.00000 |
| rad25    | 2.64298e-30 | 1.00000 | 2.64298e-30 | 1.00000 |
| rad71    | 1.66929e-31 | 1.00000 | 1.66929e-31 | 1.00000 |
| rad15    | 1.42567e-31 | 1.00000 | 1.42567e-31 | 1.00000 |
| rad23    | 7.84688e-33 | 1.00000 | 7.84688e-33 | 1.00000 |
| rad5     | 4.87525e-33 | 1.00000 | 4.87525e-33 | 1.00000 |
| rad31    | 2.04775e-34 | 1.00000 | 2.04775e-34 | 1.00000 |
| rad45    | 6.68913e-35 | 1.00000 | 6.68913e-35 | 1.00000 |
| rad20    | 3.40848e-35 | 1.00000 | 3.40848e-35 | 1.00000 |
| rad21    | 2.57384e-35 | 1.00000 | 2.57384e-35 | 1.00000 |
| rad22    | 5.72536e-36 | 1.00000 | 5.72536e-36 | 1.00000 |
| rad36    | 4.12345e-36 | 1.00000 | 4.12345e-36 | 1.00000 |
| rad12    | 1.65739e-36 | 1.00000 | 1.65739e-36 | 1.00000 |
| rad18    | 1.59084e-37 | 1.00000 | 1.59084e-37 | 1.00000 |
| rad19syn | 8.89196e-39 | 1.00000 | 8.89196e-39 | 1.00000 |
| rad24    | 3.20946e-42 | 1.00000 | 3.20946e-42 | 1.00000 |
| rad8     | 3.08796e-61 | 1.00000 | 3.08796e-61 | 1.00000 |

0.100000000E-02 Pa, 180.000000 K

| Rate constant             | True (fraction)        | Effective (fraction)   |
|---------------------------|------------------------|------------------------|
| Total                     | 1.12884e-14 (1.00 )    | 1.12884e-14 (1.00 )    |
| Formation of rad19        | 1.12881e-14 (1.000 )   | 1.12881e-14 (1.000 )   |
| H-abstraction to cyc2enyl | 2.75916e-19 (2.44e-05) | 2.75916e-19 (2.44e-05) |
| H-abstraction to cyclenyl | 2.39955e-23 (2.13e-09) | 2.39955e-23 (2.13e-09) |

| species                       | PYtrue      | Cumul    | PYeffective | Cumul    |
|-------------------------------|-------------|----------|-------------|----------|
| Indene+H                      | 0.999638    | 0.999638 | 0.999638    | 0.999638 |
| PhCHCCH2+H                    | 0.000320237 | 0.999958 | 0.000320237 | 0.999958 |
| Benzene+cycloprop-2-enylidene | 2.44424e-05 | 0.999982 | 2.44424e-05 | 0.999982 |
| PhCCH+CH3                     | 5.69143e-06 | 0.999988 | 5.69143e-06 | 0.999988 |
| C2H2+PhCH2                    | 4.41165e-06 | 0.999992 | 4.41165e-06 | 0.999992 |
| PhCCCH3+H                     | 3.34270e-06 | 0.999996 | 3.34270e-06 | 0.999996 |
| Ph+MeAc                       | 2.73409e-06 | 0.999998 | 2.73409e-06 | 0.999998 |
| rad67                         | 8.07006e-07 | 0.999999 | 8.07006e-07 | 0.999999 |
| rad35                         | 3.49601e-07 | 1.000000 | 3.49601e-07 | 1.000000 |
| Ph+Allene                     | 2.89641e-07 | 1.000000 | 2.89641e-07 | 1.000000 |
| PhCH2CCH+H                    | 3.99416e-08 | 1.000000 | 3.99416e-08 | 1.000000 |
| PAH7+H                        | 3.42810e-08 | 1.000000 | 3.42810e-08 | 1.000000 |
| rad39                         | 9.67233e-09 | 1.000000 | 9.67233e-09 | 1.000000 |
| rad37                         | 9.25278e-09 | 1.000000 | 9.25278e-09 | 1.000000 |
| rad30                         | 6.63273e-09 | 1.000000 | 6.63273e-09 | 1.000000 |
| Benzene+cycloprop-1-enylidene | 2.12567e-09 | 1.000000 | 2.12567e-09 | 1.000000 |
| PAH9+H                        | 5.06881e-10 | 1.000000 | 5.06881e-10 | 1.000000 |
| rad38                         | 2.29236e-10 | 1.000000 | 2.29236e-10 | 1.000000 |
| rad60syn                      | 3.57039e-11 | 1.000000 | 3.57039e-11 | 1.000000 |
| PAH10+CH3                     | 2.35096e-11 | 1.000000 | 2.35096e-11 | 1.000000 |
| PAH3+H                        | 1.86587e-11 | 1.000000 | 1.86587e-11 | 1.000000 |
| rad60anti                     | 1.77715e-11 | 1.000000 | 1.77715e-11 | 1.000000 |
| rad46                         | 1.45742e-11 | 1.000000 | 1.45742e-11 | 1.000000 |
| PhcycC3H3_A+H                 | 1.01654e-11 | 1.000000 | 1.01654e-11 | 1.000000 |
| rad59                         | 3.71043e-12 | 1.000000 | 3.71043e-12 | 1.000000 |
| rad43                         | 9.19854e-13 | 1.000000 | 9.19854e-13 | 1.000000 |
| rad54                         | 8.60254e-13 | 1.000000 | 8.60254e-13 | 1.000000 |
| rad62                         | 2.04274e-13 | 1.000000 | 2.04274e-13 | 1.000000 |
| rad50                         | 1.42114e-13 | 1.000000 | 1.42114e-13 | 1.000000 |
| Phenyl+cycC3H4                | 8.44565e-14 | 1.000000 | 0.000000    | 1.000000 |
| PhcycC3H3_B+H                 | 2.84776e-14 | 1.000000 | 2.84776e-14 | 1.000000 |
| rad70                         | 2.05492e-14 | 1.000000 | 2.05492e-14 | 1.000000 |
| rad55                         | 9.11251e-15 | 1.000000 | 9.11251e-15 | 1.000000 |
| PAH1+H                        | 7.32220e-15 | 1.000000 | 7.32220e-15 | 1.000000 |
| rad52                         | 1.21472e-15 | 1.000000 | 1.21472e-15 | 1.000000 |
| rad58                         | 5.98614e-16 | 1.000000 | 5.98614e-16 | 1.000000 |
| rad51                         | 4.25382e-16 | 1.000000 | 4.25382e-16 | 1.000000 |
| rad34                         | 4.00722e-16 | 1.000000 | 4.00722e-16 | 1.000000 |
| rad41                         | 8.74610e-17 | 1.000000 | 8.74610e-17 | 1.000000 |
| rad42                         | 6.22087e-17 | 1.000000 | 6.22087e-17 | 1.000000 |
| rad65                         | 9.95702e-18 | 1.000000 | 9.95702e-18 | 1.000000 |
| rad53                         | 3.16048e-19 | 1.000000 | 3.16048e-19 | 1.000000 |
| rad64                         | 5.99750e-20 | 1.000000 | 5.99750e-20 | 1.000000 |
| rad6                          | 7.06158e-21 | 1.000000 | 7.06158e-21 | 1.000000 |
| rad61                         | 4.00796e-21 | 1.000000 | 4.00796e-21 | 1.000000 |
| rad56                         | 1.79198e-22 | 1.000000 | 1.79198e-22 | 1.000000 |
| rad68syn                      | 1.75219e-23 | 1.000000 | 1.75219e-23 | 1.000000 |
| rad68anti                     | 1.37230e-23 | 1.000000 | 1.37230e-23 | 1.000000 |
| rad28                         | 6.67491e-24 | 1.000000 | 6.67491e-24 | 1.000000 |



|           |             |          |             |          |
|-----------|-------------|----------|-------------|----------|
| rad2      | 3.76326e-24 | 1.000000 | 3.76326e-24 | 1.000000 |
| rad26     | 8.83545e-25 | 1.000000 | 8.83545e-25 | 1.000000 |
| rad7      | 5.36242e-25 | 1.000000 | 5.36242e-25 | 1.000000 |
| rad1      | 2.51277e-25 | 1.000000 | 2.51277e-25 | 1.000000 |
| rad10     | 1.94097e-25 | 1.000000 | 1.94097e-25 | 1.000000 |
| rad11     | 1.33367e-25 | 1.000000 | 1.33367e-25 | 1.000000 |
| rad40syn  | 3.05799e-26 | 1.000000 | 3.05799e-26 | 1.000000 |
| rad40anti | 2.44830e-26 | 1.000000 | 2.44830e-26 | 1.000000 |
| rad3      | 2.38235e-26 | 1.000000 | 2.38235e-26 | 1.000000 |
| rad4      | 1.22009e-26 | 1.000000 | 1.22009e-26 | 1.000000 |
| rad13     | 2.92177e-27 | 1.000000 | 2.92177e-27 | 1.000000 |
| rad73     | 1.39304e-27 | 1.000000 | 1.39304e-27 | 1.000000 |
| PAH8+H    | 1.32186e-27 | 1.000000 | 1.32186e-27 | 1.000000 |
| rad9      | 3.61203e-28 | 1.000000 | 3.61203e-28 | 1.000000 |
| rad47     | 6.50834e-29 | 1.000000 | 6.50834e-29 | 1.000000 |
| rad19anti | 2.31232e-29 | 1.000000 | 2.31232e-29 | 1.000000 |
| rad33     | 5.57469e-30 | 1.000000 | 5.57469e-30 | 1.000000 |
| rad14     | 3.05358e-30 | 1.000000 | 3.05358e-30 | 1.000000 |
| rad27     | 2.31420e-30 | 1.000000 | 2.31420e-30 | 1.000000 |
| rad25     | 2.04302e-30 | 1.000000 | 2.04302e-30 | 1.000000 |
| rad71     | 1.48893e-30 | 1.000000 | 1.48893e-30 | 1.000000 |
| rad15     | 1.59296e-31 | 1.000000 | 1.59296e-31 | 1.000000 |
| rad23     | 5.62562e-33 | 1.000000 | 5.62562e-33 | 1.000000 |
| rad5      | 4.27491e-33 | 1.000000 | 4.27491e-33 | 1.000000 |
| rad31     | 2.71031e-34 | 1.000000 | 2.71031e-34 | 1.000000 |
| rad45     | 4.78162e-35 | 1.000000 | 4.78162e-35 | 1.000000 |
| rad20     | 2.80804e-35 | 1.000000 | 2.80804e-35 | 1.000000 |
| rad21     | 2.12675e-35 | 1.000000 | 2.12675e-35 | 1.000000 |
| rad22     | 4.20430e-36 | 1.000000 | 4.20430e-36 | 1.000000 |
| rad36     | 2.95371e-36 | 1.000000 | 2.95371e-36 | 1.000000 |
| rad12     | 1.86649e-36 | 1.000000 | 1.86649e-36 | 1.000000 |
| rad18     | 1.30222e-37 | 1.000000 | 1.30222e-37 | 1.000000 |
| rad19syn  | 2.57212e-38 | 1.000000 | 2.57212e-38 | 1.000000 |
| rad24     | 2.68244e-42 | 1.000000 | 2.68244e-42 | 1.000000 |
| rad8      | 4.95850e-61 | 1.000000 | 4.95850e-61 | 1.000000 |

0.100000000E-02 Pa, 190.000000 K

=====

| Rate constant             | True (fraction)        | Effective (fraction)   |
|---------------------------|------------------------|------------------------|
| Total                     | 1.32132e-14 (1.00 )    | 1.32132e-14 (1.00 )    |
| Formation of rad19        | 1.32126e-14 (1.000 )   | 1.32126e-14 (1.000 )   |
| H-abstraction to cyc2enyl | 5.62053e-19 (4.25e-05) | 5.62053e-19 (4.25e-05) |
| H-abstraction to cyclenyl | 8.18073e-23 (6.19e-09) | 8.18073e-23 (6.19e-09) |

| species                       | PYtrue      | Cumul    | PYeffective | Cumul    |
|-------------------------------|-------------|----------|-------------|----------|
| Indene+H                      | 0.999606    | 0.999606 | 0.999606    | 0.999606 |
| PhCHCCH2+H                    | 0.000332292 | 0.999939 | 0.000332292 | 0.999939 |
| Benzene+cycloprop-2-enylidene | 4.25373e-05 | 0.999981 | 4.25373e-05 | 0.999981 |
| PhCCH+CH3                     | 5.91699e-06 | 0.999987 | 5.91699e-06 | 0.999987 |
| C2H2+PhCH2                    | 4.63006e-06 | 0.999992 | 4.63006e-06 | 0.999992 |
| PhCCCH3+H                     | 3.49166e-06 | 0.999995 | 3.49166e-06 | 0.999995 |
| Ph+MeAc                       | 2.88477e-06 | 0.999998 | 2.88477e-06 | 0.999998 |
| rad67                         | 8.49453e-07 | 0.999999 | 8.49453e-07 | 0.999999 |
| rad35                         | 3.67206e-07 | 0.999999 | 3.67206e-07 | 0.999999 |
| Ph+Allene                     | 3.12155e-07 | 1.000000 | 3.12155e-07 | 1.000000 |
| PhCH2CCH+H                    | 4.36082e-08 | 1.000000 | 4.36082e-08 | 1.000000 |
| PAH7+H                        | 3.65187e-08 | 1.000000 | 3.65187e-08 | 1.000000 |
| rad39                         | 1.03020e-08 | 1.000000 | 1.03020e-08 | 1.000000 |
| rad37                         | 9.89453e-09 | 1.000000 | 9.89453e-09 | 1.000000 |
| rad30                         | 6.98051e-09 | 1.000000 | 6.98051e-09 | 1.000000 |
| Benzene+cycloprop-1-enylidene | 6.19133e-09 | 1.000000 | 6.19133e-09 | 1.000000 |
| PAH9+H                        | 5.42544e-10 | 1.000000 | 5.42544e-10 | 1.000000 |
| rad38                         | 2.47340e-10 | 1.000000 | 2.47340e-10 | 1.000000 |
| rad60syn                      | 3.84177e-11 | 1.000000 | 3.84177e-11 | 1.000000 |
| PAH10+CH3                     | 2.71453e-11 | 1.000000 | 2.71453e-11 | 1.000000 |
| PAH3+H                        | 2.06605e-11 | 1.000000 | 2.06605e-11 | 1.000000 |
| rad60anti                     | 1.91604e-11 | 1.000000 | 1.91604e-11 | 1.000000 |
| rad46                         | 1.58102e-11 | 1.000000 | 1.58102e-11 | 1.000000 |
| PhcycC3H3_A+H                 | 1.33135e-11 | 1.000000 | 1.33135e-11 | 1.000000 |
| rad59                         | 4.08937e-12 | 1.000000 | 4.08937e-12 | 1.000000 |
| rad43                         | 1.04093e-12 | 1.000000 | 1.04093e-12 | 1.000000 |
| rad54                         | 9.92277e-13 | 1.000000 | 9.92277e-13 | 1.000000 |
| rad62                         | 2.31614e-13 | 1.000000 | 2.31614e-13 | 1.000000 |
| rad50                         | 1.60774e-13 | 1.000000 | 1.60774e-13 | 1.000000 |
| Phenyl+cycC3H4                | 1.24603e-13 | 1.000000 | 0.000000    | 1.000000 |
| PhcycC3H3_B+H                 | 5.08976e-14 | 1.000000 | 5.08976e-14 | 1.000000 |
| rad70                         | 2.47591e-14 | 1.000000 | 2.47591e-14 | 1.000000 |
| rad55                         | 1.09805e-14 | 1.000000 | 1.09805e-14 | 1.000000 |

|           |             |          |             |          |
|-----------|-------------|----------|-------------|----------|
| PAH1+H    | 9.37165e-15 | 1.000000 | 9.37165e-15 | 1.000000 |
| rad52     | 1.41903e-15 | 1.000000 | 1.41903e-15 | 1.000000 |
| rad58     | 7.35850e-16 | 1.000000 | 7.35850e-16 | 1.000000 |
| rad51     | 5.16403e-16 | 1.000000 | 5.16403e-16 | 1.000000 |
| rad34     | 5.14899e-16 | 1.000000 | 5.14899e-16 | 1.000000 |
| rad41     | 1.17037e-16 | 1.000000 | 1.17037e-16 | 1.000000 |
| rad42     | 8.10423e-17 | 1.000000 | 8.10423e-17 | 1.000000 |
| rad65     | 1.22835e-17 | 1.000000 | 1.22835e-17 | 1.000000 |
| rad53     | 5.56066e-19 | 1.000000 | 5.56066e-19 | 1.000000 |
| rad64     | 1.17013e-19 | 1.000000 | 1.17013e-19 | 1.000000 |
| rad61     | 1.05586e-20 | 1.000000 | 1.05586e-20 | 1.000000 |
| rad6      | 5.53375e-21 | 1.000000 | 5.53375e-21 | 1.000000 |
| rad56     | 5.33155e-22 | 1.000000 | 5.33155e-22 | 1.000000 |
| rad68syn  | 5.52611e-23 | 1.000000 | 5.52611e-23 | 1.000000 |
| rad68anti | 4.29972e-23 | 1.000000 | 4.29972e-23 | 1.000000 |
| rad28     | 5.24687e-24 | 1.000000 | 5.24687e-24 | 1.000000 |
| rad2      | 2.95425e-24 | 1.000000 | 2.95425e-24 | 1.000000 |
| rad26     | 7.16193e-25 | 1.000000 | 7.16193e-25 | 1.000000 |
| rad7      | 4.20264e-25 | 1.000000 | 4.20264e-25 | 1.000000 |
| rad1      | 1.98651e-25 | 1.000000 | 1.98651e-25 | 1.000000 |
| rad10     | 1.52445e-25 | 1.000000 | 1.52445e-25 | 1.000000 |
| rad40syn  | 1.47211e-25 | 1.000000 | 1.47211e-25 | 1.000000 |
| rad40anti | 1.18053e-25 | 1.000000 | 1.18053e-25 | 1.000000 |
| rad11     | 1.04555e-25 | 1.000000 | 1.04555e-25 | 1.000000 |
| rad3      | 1.86852e-26 | 1.000000 | 1.86852e-26 | 1.000000 |
| rad4      | 9.58753e-27 | 1.000000 | 9.58753e-27 | 1.000000 |
| PAH8+H    | 8.53874e-27 | 1.000000 | 8.53874e-27 | 1.000000 |
| rad73     | 6.34219e-27 | 1.000000 | 6.34219e-27 | 1.000000 |
| rad13     | 2.29783e-27 | 1.000000 | 2.29783e-27 | 1.000000 |
| rad9      | 4.30384e-28 | 1.000000 | 4.30384e-28 | 1.000000 |
| rad47     | 6.80097e-29 | 1.000000 | 6.80097e-29 | 1.000000 |
| rad19anti | 6.45302e-29 | 1.000000 | 6.45302e-29 | 1.000000 |
| rad71     | 1.07843e-29 | 1.000000 | 1.07843e-29 | 1.000000 |
| rad33     | 4.39180e-30 | 1.000000 | 4.39180e-30 | 1.000000 |
| rad14     | 2.42964e-30 | 1.000000 | 2.42964e-30 | 1.000000 |
| rad27     | 1.82959e-30 | 1.000000 | 1.82959e-30 | 1.000000 |
| rad25     | 1.61349e-30 | 1.000000 | 1.61349e-30 | 1.000000 |
| rad15     | 1.90177e-31 | 1.000000 | 1.90177e-31 | 1.000000 |
| rad23     | 4.18665e-33 | 1.000000 | 4.18665e-33 | 1.000000 |
| rad5      | 3.77821e-33 | 1.000000 | 3.77821e-33 | 1.000000 |
| rad31     | 4.64642e-34 | 1.000000 | 4.64642e-34 | 1.000000 |
| rad45     | 3.54994e-35 | 1.000000 | 3.54994e-35 | 1.000000 |
| rad20     | 2.36772e-35 | 1.000000 | 2.36772e-35 | 1.000000 |
| rad21     | 1.79890e-35 | 1.000000 | 1.79890e-35 | 1.000000 |
| rad22     | 3.18631e-36 | 1.000000 | 3.18631e-36 | 1.000000 |
| rad12     | 2.24706e-36 | 1.000000 | 2.24706e-36 | 1.000000 |
| rad36     | 2.19821e-36 | 1.000000 | 2.19821e-36 | 1.000000 |
| rad18     | 1.09090e-37 | 1.000000 | 1.09090e-37 | 1.000000 |
| rad19syn  | 7.83212e-38 | 1.000000 | 7.83212e-38 | 1.000000 |
| rad24     | 2.34257e-42 | 1.000000 | 2.34257e-42 | 1.000000 |
| rad8      | 8.13021e-61 | 1.000000 | 8.13021e-61 | 1.000000 |

0.100000000E-02 Pa, 200.000000 K

=====

| Rate constant             | True (fraction)        | Effective (fraction)   |
|---------------------------|------------------------|------------------------|
| Total                     | 1.52621e-14 (1.00 )    | 1.52621e-14 (1.00 )    |
| Formation of rad19        | 1.52610e-14 (1.000 )   | 1.52610e-14 (1.000 )   |
| H-abstraction to cyc2enyl | 1.06427e-18 (6.97e-05) | 1.06427e-18 (6.97e-05) |
| H-abstraction to cyclenyl | 2.46309e-22 (1.61e-08) | 2.46309e-22 (1.61e-08) |

| species                       | PYtrue      | Cumul    | PYeffective | Cumul    |
|-------------------------------|-------------|----------|-------------|----------|
| Indene+H                      | 0.999565    | 0.999565 | 0.999565    | 0.999565 |
| PhCHCCH2+H                    | 0.000345432 | 0.999911 | 0.000345432 | 0.999911 |
| Benzene+cycloprop-2-enylidene | 6.97330e-05 | 0.999980 | 6.97330e-05 | 0.999980 |
| PhCCH+CH3                     | 6.16236e-06 | 0.999987 | 6.16236e-06 | 0.999987 |
| C2H2+PhCH2                    | 4.87094e-06 | 0.999991 | 4.87094e-06 | 0.999991 |
| PhCCCH3+H                     | 3.65491e-06 | 0.999995 | 3.65491e-06 | 0.999995 |
| Ph+MeAc                       | 3.05167e-06 | 0.999998 | 3.05167e-06 | 0.999998 |
| rad67                         | 8.96409e-07 | 0.999999 | 8.96409e-07 | 0.999999 |
| rad35                         | 3.86640e-07 | 0.999999 | 3.86640e-07 | 0.999999 |
| Ph+Allene                     | 3.37735e-07 | 1.000000 | 3.37735e-07 | 1.000000 |
| PhCH2CCH+H                    | 4.78321e-08 | 1.000000 | 4.78321e-08 | 1.000000 |
| PAH7+H                        | 3.90282e-08 | 1.000000 | 3.90282e-08 | 1.000000 |
| Benzene+cycloprop-1-enylidene | 1.61386e-08 | 1.000000 | 1.61386e-08 | 1.000000 |
| rad39                         | 1.10073e-08 | 1.000000 | 1.10073e-08 | 1.000000 |
| rad37                         | 1.06171e-08 | 1.000000 | 1.06171e-08 | 1.000000 |
| rad30                         | 7.36596e-09 | 1.000000 | 7.36596e-09 | 1.000000 |
| PAH9+H                        | 5.82858e-10 | 1.000000 | 5.82858e-10 | 1.000000 |

|                |             |          |             |          |
|----------------|-------------|----------|-------------|----------|
| rad38          | 2.68017e-10 | 1.000000 | 2.68017e-10 | 1.000000 |
| rad60syn       | 4.14998e-11 | 1.000000 | 4.14998e-11 | 1.000000 |
| PAH10+CH3      | 3.15718e-11 | 1.000000 | 3.15718e-11 | 1.000000 |
| PAH3+H         | 2.30050e-11 | 1.000000 | 2.30050e-11 | 1.000000 |
| rad60anti      | 2.07412e-11 | 1.000000 | 2.07412e-11 | 1.000000 |
| PhcycC3H3_A+H  | 1.75313e-11 | 1.000000 | 1.75313e-11 | 1.000000 |
| rad46          | 1.72283e-11 | 1.000000 | 1.72283e-11 | 1.000000 |
| rad59          | 4.53079e-12 | 1.000000 | 4.53079e-12 | 1.000000 |
| rad43          | 1.18502e-12 | 1.000000 | 1.18502e-12 | 1.000000 |
| rad54          | 1.15297e-12 | 1.000000 | 1.15297e-12 | 1.000000 |
| rad62          | 2.64126e-13 | 1.000000 | 2.64126e-13 | 1.000000 |
| Phenyl+cycC3H4 | 1.83626e-13 | 1.000000 | 0.000000    | 1.000000 |
| rad50          | 1.83171e-13 | 1.000000 | 1.83171e-13 | 1.000000 |
| PhcycC3H3_B+H  | 8.87690e-14 | 1.000000 | 8.87690e-14 | 1.000000 |
| rad70          | 3.00938e-14 | 1.000000 | 3.00938e-14 | 1.000000 |
| rad55          | 1.33459e-14 | 1.000000 | 1.33459e-14 | 1.000000 |
| PAH1+H         | 1.21055e-14 | 1.000000 | 1.21055e-14 | 1.000000 |
| rad52          | 1.67230e-15 | 1.000000 | 1.67230e-15 | 1.000000 |
| rad58          | 9.13194e-16 | 1.000000 | 9.13194e-16 | 1.000000 |
| rad34          | 6.67791e-16 | 1.000000 | 6.67791e-16 | 1.000000 |
| rad51          | 6.33500e-16 | 1.000000 | 6.33500e-16 | 1.000000 |
| rad41          | 1.57580e-16 | 1.000000 | 1.57580e-16 | 1.000000 |
| rad42          | 1.06218e-16 | 1.000000 | 1.06218e-16 | 1.000000 |
| rad65          | 1.53164e-17 | 1.000000 | 1.53164e-17 | 1.000000 |
| rad53          | 9.61748e-19 | 1.000000 | 9.61748e-19 | 1.000000 |
| rad64          | 2.21447e-19 | 1.000000 | 2.21447e-19 | 1.000000 |
| rad61          | 2.60100e-20 | 1.000000 | 2.60100e-20 | 1.000000 |
| rad6           | 4.43501e-21 | 1.000000 | 4.43501e-21 | 1.000000 |
| rad56          | 1.46261e-21 | 1.000000 | 1.46261e-21 | 1.000000 |
| rad68syn       | 1.59246e-22 | 1.000000 | 1.59246e-22 | 1.000000 |
| rad68anti      | 1.23063e-22 | 1.000000 | 1.23063e-22 | 1.000000 |
| rad28          | 4.21353e-24 | 1.000000 | 4.21353e-24 | 1.000000 |
| rad2           | 2.38290e-24 | 1.000000 | 2.38290e-24 | 1.000000 |
| rad40syn       | 6.17070e-25 | 1.000000 | 6.17070e-25 | 1.000000 |
| rad26          | 6.02257e-25 | 1.000000 | 6.02257e-25 | 1.000000 |
| rad40anti      | 4.95186e-25 | 1.000000 | 4.95186e-25 | 1.000000 |
| rad7           | 3.36918e-25 | 1.000000 | 3.36918e-25 | 1.000000 |
| rad1           | 1.61462e-25 | 1.000000 | 1.61462e-25 | 1.000000 |
| rad10          | 1.23040e-25 | 1.000000 | 1.23040e-25 | 1.000000 |
| rad11          | 8.38481e-26 | 1.000000 | 8.38481e-26 | 1.000000 |
| PAH8+H         | 4.65846e-26 | 1.000000 | 4.65846e-26 | 1.000000 |
| rad73          | 2.55570e-26 | 1.000000 | 2.55570e-26 | 1.000000 |
| rad3           | 1.50436e-26 | 1.000000 | 1.50436e-26 | 1.000000 |
| rad4           | 7.73504e-27 | 1.000000 | 7.73504e-27 | 1.000000 |
| rad13          | 1.84845e-27 | 1.000000 | 1.84845e-27 | 1.000000 |
| rad9           | 5.67545e-28 | 1.000000 | 5.67545e-28 | 1.000000 |
| rad19anti      | 1.88743e-28 | 1.000000 | 1.88743e-28 | 1.000000 |
| rad47          | 7.19915e-29 | 1.000000 | 7.19915e-29 | 1.000000 |
| rad71          | 6.53595e-29 | 1.000000 | 6.53595e-29 | 1.000000 |
| rad33          | 3.53935e-30 | 1.000000 | 3.53935e-30 | 1.000000 |
| rad14          | 1.98915e-30 | 1.000000 | 1.98915e-30 | 1.000000 |
| rad27          | 1.48736e-30 | 1.000000 | 1.48736e-30 | 1.000000 |
| rad25          | 1.30400e-30 | 1.000000 | 1.30400e-30 | 1.000000 |
| rad15          | 2.51292e-31 | 1.000000 | 2.51292e-31 | 1.000000 |
| rad5           | 3.36226e-33 | 1.000000 | 3.36226e-33 | 1.000000 |
| rad23          | 3.25097e-33 | 1.000000 | 3.25097e-33 | 1.000000 |
| rad31          | 9.63480e-34 | 1.000000 | 9.63480e-34 | 1.000000 |
| rad45          | 2.75120e-35 | 1.000000 | 2.75120e-35 | 1.000000 |
| rad20          | 2.04671e-35 | 1.000000 | 2.04671e-35 | 1.000000 |
| rad21          | 1.56019e-35 | 1.000000 | 1.56019e-35 | 1.000000 |
| rad12          | 2.99576e-36 | 1.000000 | 2.99576e-36 | 1.000000 |
| rad22          | 2.49723e-36 | 1.000000 | 2.49723e-36 | 1.000000 |
| rad36          | 1.70842e-36 | 1.000000 | 1.70842e-36 | 1.000000 |
| rad19syn       | 2.51002e-37 | 1.000000 | 2.51002e-37 | 1.000000 |
| rad18          | 9.36684e-38 | 1.000000 | 9.36684e-38 | 1.000000 |
| rad24          | 2.14128e-42 | 1.000000 | 2.14128e-42 | 1.000000 |
| rad8           | 1.36111e-60 | 1.000000 | 1.36111e-60 | 1.000000 |

0.100000000E-02 Pa, 210.000000 K

| Rate constant             | True (fraction)        | Effective (fraction)   |
|---------------------------|------------------------|------------------------|
| Total                     | 1.74272e-14 (1.00)     | 1.74272e-14 (1.00)     |
| Formation of rad19        | 1.74253e-14 (1.000)    | 1.74253e-14 (1.000)    |
| H-abstraction to cyc2enyl | 1.89310e-18 (0.000109) | 1.89310e-18 (0.000109) |
| H-abstraction to cyclenyl | 6.66714e-22 (3.83e-08) | 6.66714e-22 (3.83e-08) |

  

| species  | PYtrue   | Cumul    | PYeffective | Cumul    |
|----------|----------|----------|-------------|----------|
| Indene+H | 0.999511 | 0.999511 | 0.999511    | 0.999511 |

|                               |             |          |             |          |
|-------------------------------|-------------|----------|-------------|----------|
| PhCHCCH2+H                    | 0.000359770 | 0.999871 | 0.000359770 | 0.999871 |
| Benzene+cycloprop-2-enylidene | 0.000108629 | 0.999980 | 0.000108629 | 0.999980 |
| PhCCH+CH3                     | 6.42947e-06 | 0.999986 | 6.42947e-06 | 0.999986 |
| C2H2+PhCH2                    | 5.13690e-06 | 0.999991 | 5.13690e-06 | 0.999991 |
| PhCCCH3+H                     | 3.83396e-06 | 0.999995 | 3.83396e-06 | 0.999995 |
| Ph+MeAc                       | 3.23679e-06 | 0.999998 | 3.23679e-06 | 0.999998 |
| rad67                         | 9.48429e-07 | 0.999999 | 9.48429e-07 | 0.999999 |
| rad35                         | 4.08121e-07 | 1.000000 | 4.08121e-07 | 1.000000 |
| Ph+Allene                     | 3.66868e-07 | 1.000000 | 3.66868e-07 | 1.000000 |
| PhCH2CCH+H                    | 5.27115e-08 | 1.000000 | 5.27115e-08 | 1.000000 |
| PAH7+H                        | 4.18476e-08 | 1.000000 | 4.18476e-08 | 1.000000 |
| Benzene+cycloprop-1-enylidene | 3.82571e-08 | 1.000000 | 3.82571e-08 | 1.000000 |
| rad39                         | 1.17992e-08 | 1.000000 | 1.17992e-08 | 1.000000 |
| rad37                         | 1.14321e-08 | 1.000000 | 1.14321e-08 | 1.000000 |
| rad30                         | 7.79379e-09 | 1.000000 | 7.79379e-09 | 1.000000 |
| PAH9+H                        | 6.28539e-10 | 1.000000 | 6.28539e-10 | 1.000000 |
| rad38                         | 2.91700e-10 | 1.000000 | 2.91700e-10 | 1.000000 |
| rad60syn                      | 4.50091e-11 | 1.000000 | 4.50091e-11 | 1.000000 |
| PAH10+CH3                     | 3.69842e-11 | 1.000000 | 3.69842e-11 | 1.000000 |
| PAH3+H                        | 2.57608e-11 | 1.000000 | 2.57608e-11 | 1.000000 |
| PhcycC3H3_A+H                 | 2.31914e-11 | 1.000000 | 2.31914e-11 | 1.000000 |
| rad60anti                     | 2.25451e-11 | 1.000000 | 2.25451e-11 | 1.000000 |
| rad46                         | 1.88604e-11 | 1.000000 | 1.88604e-11 | 1.000000 |
| rad59                         | 5.04678e-12 | 1.000000 | 5.04678e-12 | 1.000000 |
| rad43                         | 1.35706e-12 | 1.000000 | 1.35706e-12 | 1.000000 |
| rad54                         | 1.34940e-12 | 1.000000 | 1.34940e-12 | 1.000000 |
| rad62                         | 3.02904e-13 | 1.000000 | 3.02904e-13 | 1.000000 |
| Phenyl+cycC3H4                | 2.70226e-13 | 1.000000 | 0.000000    | 1.000000 |
| rad50                         | 2.10183e-13 | 1.000000 | 2.10183e-13 | 1.000000 |
| PhcycC3H3_B+H                 | 1.51586e-13 | 1.000000 | 1.51586e-13 | 1.000000 |
| rad70                         | 3.68870e-14 | 1.000000 | 3.68870e-14 | 1.000000 |
| rad55                         | 1.63548e-14 | 1.000000 | 1.63548e-14 | 1.000000 |
| PAH1+H                        | 1.57688e-14 | 1.000000 | 1.57688e-14 | 1.000000 |
| rad52                         | 1.98808e-15 | 1.000000 | 1.98808e-15 | 1.000000 |
| rad58                         | 1.14361e-15 | 1.000000 | 1.14361e-15 | 1.000000 |
| rad34                         | 8.73476e-16 | 1.000000 | 8.73476e-16 | 1.000000 |
| rad51                         | 7.85141e-16 | 1.000000 | 7.85141e-16 | 1.000000 |
| rad41                         | 2.13275e-16 | 1.000000 | 2.13275e-16 | 1.000000 |
| rad42                         | 1.39937e-16 | 1.000000 | 1.39937e-16 | 1.000000 |
| rad65                         | 1.92959e-17 | 1.000000 | 1.92959e-17 | 1.000000 |
| rad53                         | 1.63917e-18 | 1.000000 | 1.63917e-18 | 1.000000 |
| rad64                         | 4.08337e-19 | 1.000000 | 4.08337e-19 | 1.000000 |
| rad61                         | 6.05357e-20 | 1.000000 | 6.05357e-20 | 1.000000 |
| rad56                         | 3.74704e-21 | 1.000000 | 3.74704e-21 | 1.000000 |
| rad6                          | 3.64852e-21 | 1.000000 | 3.64852e-21 | 1.000000 |
| rad68syn                      | 4.25331e-22 | 1.000000 | 4.25331e-22 | 1.000000 |
| rad68anti                     | 3.26414e-22 | 1.000000 | 3.26414e-22 | 1.000000 |
| rad28                         | 3.46763e-24 | 1.000000 | 3.46763e-24 | 1.000000 |
| rad40syn                      | 2.29905e-24 | 1.000000 | 2.29905e-24 | 1.000000 |
| rad2                          | 1.98874e-24 | 1.000000 | 1.98874e-24 | 1.000000 |
| rad40anti                     | 1.84460e-24 | 1.000000 | 1.84460e-24 | 1.000000 |
| rad26                         | 5.30711e-25 | 1.000000 | 5.30711e-25 | 1.000000 |
| rad7                          | 2.77301e-25 | 1.000000 | 2.77301e-25 | 1.000000 |
| PAH8+H                        | 2.19675e-25 | 1.000000 | 2.19675e-25 | 1.000000 |
| rad1                          | 1.35877e-25 | 1.000000 | 1.35877e-25 | 1.000000 |
| rad10                         | 1.02767e-25 | 1.000000 | 1.02767e-25 | 1.000000 |
| rad73                         | 9.27864e-26 | 1.000000 | 9.27864e-26 | 1.000000 |
| rad11                         | 6.90374e-26 | 1.000000 | 6.90374e-26 | 1.000000 |
| rad3                          | 1.25097e-26 | 1.000000 | 1.25097e-26 | 1.000000 |
| rad4                          | 6.44682e-27 | 1.000000 | 6.44682e-27 | 1.000000 |
| rad13                         | 1.52654e-27 | 1.000000 | 1.52654e-27 | 1.000000 |
| rad9                          | 8.71177e-28 | 1.000000 | 8.71177e-28 | 1.000000 |
| rad19anti                     | 5.77015e-28 | 1.000000 | 5.77015e-28 | 1.000000 |
| rad71                         | 3.39162e-28 | 1.000000 | 3.39162e-28 | 1.000000 |
| rad47                         | 7.72341e-29 | 1.000000 | 7.72341e-29 | 1.000000 |
| rad33                         | 2.92861e-30 | 1.000000 | 2.92861e-30 | 1.000000 |
| rad14                         | 1.68795e-30 | 1.000000 | 1.68795e-30 | 1.000000 |
| rad27                         | 1.25242e-30 | 1.000000 | 1.25242e-30 | 1.000000 |
| rad25                         | 1.08238e-30 | 1.000000 | 1.08238e-30 | 1.000000 |
| rad15                         | 3.86538e-31 | 1.000000 | 3.86538e-31 | 1.000000 |
| rad5                          | 3.01015e-33 | 1.000000 | 3.01015e-33 | 1.000000 |
| rad23                         | 2.67044e-33 | 1.000000 | 2.67044e-33 | 1.000000 |
| rad31                         | 2.24325e-33 | 1.000000 | 2.24325e-33 | 1.000000 |
| rad45                         | 2.25663e-35 | 1.000000 | 2.25663e-35 | 1.000000 |
| rad20                         | 1.82055e-35 | 1.000000 | 1.82055e-35 | 1.000000 |
| rad21                         | 1.39267e-35 | 1.000000 | 1.39267e-35 | 1.000000 |
| rad12                         | 4.65183e-36 | 1.000000 | 4.65183e-36 | 1.000000 |
| rad22                         | 2.03687e-36 | 1.000000 | 2.03687e-36 | 1.000000 |
| rad36                         | 1.40586e-36 | 1.000000 | 1.40586e-36 | 1.000000 |
| rad19syn                      | 8.46110e-37 | 1.000000 | 8.46110e-37 | 1.000000 |

|       |             |         |             |         |
|-------|-------------|---------|-------------|---------|
| rad18 | 8.27317e-38 | 1.00000 | 8.27317e-38 | 1.00000 |
| rad24 | 2.05965e-42 | 1.00000 | 2.05965e-42 | 1.00000 |
| rad8  | 2.32668e-60 | 1.00000 | 2.32668e-60 | 1.00000 |

0.100000000E-02 Pa, 220.000000 K

| Rate constant             | True (fraction)        | Effective (fraction)   |
|---------------------------|------------------------|------------------------|
| Total                     | 1.97009e-14 (1.00 )    | 1.97009e-14 (1.00 )    |
| Formation of rad19        | 1.96977e-14 (1.000 )   | 1.96977e-14 (1.000 )   |
| H-abstraction to cyc2enyl | 3.19064e-18 (0.000162) | 3.19064e-18 (0.000162) |
| H-abstraction to cyc1enyl | 1.64627e-21 (8.36e-08) | 1.64627e-21 (8.36e-08) |

| species                       | PYtrue      | Cumul    | PYeffective | Cumul    |
|-------------------------------|-------------|----------|-------------|----------|
| Indene+H                      | 0.999441    | 0.999441 | 0.999441    | 0.999441 |
| PhCHCCH2+H                    | 0.000375423 | 0.999816 | 0.000375423 | 0.999816 |
| Benzene+cycloprop-2-enylidene | 0.000161954 | 0.999978 | 0.000161954 | 0.999978 |
| PhCCH+CH3                     | 6.72033e-06 | 0.999985 | 6.72033e-06 | 0.999985 |
| C2H2+PhCH2                    | 5.43084e-06 | 0.999991 | 5.43084e-06 | 0.999991 |
| PhCCCH3+H                     | 4.03051e-06 | 0.999995 | 4.03051e-06 | 0.999995 |
| Ph+MeAc                       | 3.44234e-06 | 0.999998 | 3.44234e-06 | 0.999998 |
| rad67                         | 1.00612e-06 | 0.999999 | 1.00612e-06 | 0.999999 |
| rad35                         | 4.31890e-07 | 0.999999 | 4.31890e-07 | 0.999999 |
| Ph+Allene                     | 4.00112e-07 | 1.000000 | 4.00112e-07 | 1.000000 |
| Benzene+cycloprop-1-enylidene | 8.35632e-08 | 1.000000 | 8.35632e-08 | 1.000000 |
| PhCH2CCH+H                    | 5.83619e-08 | 1.000000 | 5.83619e-08 | 1.000000 |
| PAH7+H                        | 4.50199e-08 | 1.000000 | 4.50199e-08 | 1.000000 |
| rad39                         | 1.26891e-08 | 1.000000 | 1.26891e-08 | 1.000000 |
| rad37                         | 1.23531e-08 | 1.000000 | 1.23531e-08 | 1.000000 |
| rad30                         | 8.26927e-09 | 1.000000 | 8.26927e-09 | 1.000000 |
| PAH9+H                        | 6.80406e-10 | 1.000000 | 6.80406e-10 | 1.000000 |
| rad38                         | 3.18894e-10 | 1.000000 | 3.18894e-10 | 1.000000 |
| rad60syn                      | 4.90135e-11 | 1.000000 | 4.90135e-11 | 1.000000 |
| PAH10+CH3                     | 4.36269e-11 | 1.000000 | 4.36269e-11 | 1.000000 |
| PhcycC3H3_A+H                 | 3.07931e-11 | 1.000000 | 3.07931e-11 | 1.000000 |
| PAH3+H                        | 2.90106e-11 | 1.000000 | 2.90106e-11 | 1.000000 |
| rad60anti                     | 2.46082e-11 | 1.000000 | 2.46082e-11 | 1.000000 |
| rad46                         | 2.07435e-11 | 1.000000 | 2.07435e-11 | 1.000000 |
| rad59                         | 5.65170e-12 | 1.000000 | 5.65170e-12 | 1.000000 |
| rad54                         | 1.59045e-12 | 1.000000 | 1.59045e-12 | 1.000000 |
| rad43                         | 1.56308e-12 | 1.000000 | 1.56308e-12 | 1.000000 |
| Phenyl+cycC3H4                | 3.96956e-13 | 1.000000 | 0.000000    | 1.000000 |
| rad62                         | 3.49271e-13 | 1.000000 | 3.49271e-13 | 1.000000 |
| PhcycC3H3_B+H                 | 2.54101e-13 | 1.000000 | 2.54101e-13 | 1.000000 |
| rad50                         | 2.42901e-13 | 1.000000 | 2.42901e-13 | 1.000000 |
| rad70                         | 4.55735e-14 | 1.000000 | 4.55735e-14 | 1.000000 |
| PAH1+H                        | 2.06951e-14 | 1.000000 | 2.06951e-14 | 1.000000 |
| rad55                         | 2.01982e-14 | 1.000000 | 2.01982e-14 | 1.000000 |
| rad52                         | 2.38388e-15 | 1.000000 | 2.38388e-15 | 1.000000 |
| rad58                         | 1.44435e-15 | 1.000000 | 1.44435e-15 | 1.000000 |
| rad34                         | 1.15121e-15 | 1.000000 | 1.15121e-15 | 1.000000 |
| rad51                         | 9.82678e-16 | 1.000000 | 9.82678e-16 | 1.000000 |
| rad41                         | 2.89882e-16 | 1.000000 | 2.89882e-16 | 1.000000 |
| rad42                         | 1.85155e-16 | 1.000000 | 1.85155e-16 | 1.000000 |
| rad65                         | 2.45471e-17 | 1.000000 | 2.45471e-17 | 1.000000 |
| rad53                         | 2.75783e-18 | 1.000000 | 2.75783e-18 | 1.000000 |
| rad64                         | 7.36125e-19 | 1.000000 | 7.36125e-19 | 1.000000 |
| rad61                         | 1.34203e-19 | 1.000000 | 1.34203e-19 | 1.000000 |
| rad56                         | 9.05503e-21 | 1.000000 | 9.05503e-21 | 1.000000 |
| rad6                          | 3.10096e-21 | 1.000000 | 3.10096e-21 | 1.000000 |
| rad68syn                      | 1.06488e-21 | 1.000000 | 1.06488e-21 | 1.000000 |
| rad68anti                     | 8.11584e-22 | 1.000000 | 8.11584e-22 | 1.000000 |
| rad40syn                      | 7.73811e-24 | 1.000000 | 7.73811e-24 | 1.000000 |
| rad40anti                     | 6.20294e-24 | 1.000000 | 6.20294e-24 | 1.000000 |
| rad28                         | 2.94107e-24 | 1.000000 | 2.94107e-24 | 1.000000 |
| rad2                          | 1.73811e-24 | 1.000000 | 1.73811e-24 | 1.000000 |
| PAH8+H                        | 9.11861e-25 | 1.000000 | 9.11861e-25 | 1.000000 |
| rad26                         | 4.96850e-25 | 1.000000 | 4.96850e-25 | 1.000000 |
| rad73                         | 3.07711e-25 | 1.000000 | 3.07711e-25 | 1.000000 |
| rad7                          | 2.35835e-25 | 1.000000 | 2.35835e-25 | 1.000000 |
| rad1                          | 1.19826e-25 | 1.000000 | 1.19826e-25 | 1.000000 |
| rad10                         | 8.98955e-26 | 1.000000 | 8.98955e-26 | 1.000000 |
| rad11                         | 5.87379e-26 | 1.000000 | 5.87379e-26 | 1.000000 |
| rad3                          | 1.08605e-26 | 1.000000 | 1.08605e-26 | 1.000000 |
| rad4                          | 5.61079e-27 | 1.000000 | 5.61079e-27 | 1.000000 |
| rad19anti                     | 1.83797e-27 | 1.000000 | 1.83797e-27 | 1.000000 |
| rad9                          | 1.62378e-27 | 1.000000 | 1.62378e-27 | 1.000000 |
| rad71                         | 1.53448e-27 | 1.000000 | 1.53448e-27 | 1.000000 |
| rad13                         | 1.30266e-27 | 1.000000 | 1.30266e-27 | 1.000000 |

|          |             |         |             |         |
|----------|-------------|---------|-------------|---------|
| rad47    | 8.40233e-29 | 1.00000 | 8.40233e-29 | 1.00000 |
| rad33    | 2.50419e-30 | 1.00000 | 2.50419e-30 | 1.00000 |
| rad14    | 1.50236e-30 | 1.00000 | 1.50236e-30 | 1.00000 |
| rad27    | 1.10592e-30 | 1.00000 | 1.10592e-30 | 1.00000 |
| rad25    | 9.28583e-31 | 1.00000 | 9.28583e-31 | 1.00000 |
| rad15    | 7.22023e-31 | 1.00000 | 7.22023e-31 | 1.00000 |
| rad31    | 5.61198e-33 | 1.00000 | 5.61198e-33 | 1.00000 |
| rad5     | 2.70926e-33 | 1.00000 | 2.70926e-33 | 1.00000 |
| rad23    | 2.40109e-33 | 1.00000 | 2.40109e-33 | 1.00000 |
| rad45    | 2.02713e-35 | 1.00000 | 2.02713e-35 | 1.00000 |
| rad20    | 1.67729e-35 | 1.00000 | 1.67729e-35 | 1.00000 |
| rad21    | 1.28786e-35 | 1.00000 | 1.28786e-35 | 1.00000 |
| rad12    | 8.77671e-36 | 1.00000 | 8.77671e-36 | 1.00000 |
| rad19syn | 2.99699e-36 | 1.00000 | 2.99699e-36 | 1.00000 |
| rad22    | 1.75617e-36 | 1.00000 | 1.75617e-36 | 1.00000 |
| rad36    | 1.26755e-36 | 1.00000 | 1.26755e-36 | 1.00000 |
| rad18    | 7.56513e-38 | 1.00000 | 7.56513e-38 | 1.00000 |
| rad24    | 2.10767e-42 | 1.00000 | 2.10767e-42 | 1.00000 |
| rad8     | 4.06177e-60 | 1.00000 | 4.06177e-60 | 1.00000 |

0.100000000E-02 Pa, 230.000000 K

| Rate constant             | True (fraction)        | Effective (fraction)   |
|---------------------------|------------------------|------------------------|
| Total                     | 2.20761e-14 (1.00 )    | 2.20761e-14 (1.00 )    |
| Formation of rad19        | 2.20710e-14 (1.000 )   | 2.20710e-14 (1.000 )   |
| H-abstraction to cyc2enyl | 5.13155e-18 (0.000232) | 5.13155e-18 (0.000232) |
| H-abstraction to cyclenyl | 3.75316e-21 (1.70e-07) | 3.75316e-21 (1.70e-07) |

| species                       | PYtrue      | Cumul    | PYeffective | Cumul    |
|-------------------------------|-------------|----------|-------------|----------|
| Indene+H                      | 0.999352    | 0.999352 | 0.999352    | 0.999352 |
| PhCHCCH2+H                    | 0.000392519 | 0.999745 | 0.000392519 | 0.999745 |
| Benzene+cycloprop-2-enylidene | 0.000232448 | 0.999977 | 0.000232448 | 0.999977 |
| PhCCH+CH3                     | 7.03706e-06 | 0.999984 | 7.03706e-06 | 0.999984 |
| C2H2+PhCH2                    | 5.75587e-06 | 0.999990 | 5.75587e-06 | 0.999990 |
| PhCCCH3+H                     | 4.24632e-06 | 0.999994 | 4.24632e-06 | 0.999994 |
| Ph+MeAc                       | 3.67072e-06 | 0.999998 | 3.67072e-06 | 0.999998 |
| rad67                         | 1.07013e-06 | 0.999999 | 1.07013e-06 | 0.999999 |
| rad35                         | 4.58207e-07 | 1.000000 | 4.58207e-07 | 1.000000 |
| Ph+Allene                     | 4.38111e-07 | 1.000000 | 4.38111e-07 | 1.000000 |
| Benzene+cycloprop-1-enylidene | 1.70010e-07 | 1.000000 | 1.70010e-07 | 1.000000 |
| PhCH2CCH+H                    | 6.49190e-08 | 1.000000 | 6.49190e-08 | 1.000000 |
| PAH7+H                        | 4.85935e-08 | 1.000000 | 4.85935e-08 | 1.000000 |
| rad39                         | 1.36905e-08 | 1.000000 | 1.36905e-08 | 1.000000 |
| rad37                         | 1.33952e-08 | 1.000000 | 1.33952e-08 | 1.000000 |
| rad30                         | 8.79818e-09 | 1.000000 | 8.79818e-09 | 1.000000 |
| PAH9+H                        | 7.39402e-10 | 1.000000 | 7.39402e-10 | 1.000000 |
| rad38                         | 3.50192e-10 | 1.000000 | 3.50192e-10 | 1.000000 |
| rad60syn                      | 5.35909e-11 | 1.000000 | 5.35909e-11 | 1.000000 |
| PAH10+CH3                     | 5.18063e-11 | 1.000000 | 5.18063e-11 | 1.000000 |
| PhcycC3H3_A+H                 | 4.10037e-11 | 1.000000 | 4.10037e-11 | 1.000000 |
| PAH3+H                        | 3.28540e-11 | 1.000000 | 3.28540e-11 | 1.000000 |
| rad60anti                     | 2.69722e-11 | 1.000000 | 2.69722e-11 | 1.000000 |
| rad46                         | 2.29216e-11 | 1.000000 | 2.29216e-11 | 1.000000 |
| rad59                         | 6.36279e-12 | 1.000000 | 6.36279e-12 | 1.000000 |
| rad54                         | 1.88722e-12 | 1.000000 | 1.88722e-12 | 1.000000 |
| rad43                         | 1.81037e-12 | 1.000000 | 1.81037e-12 | 1.000000 |
| Phenyl+cycC3H4                | 5.81829e-13 | 1.000000 | 0.000000    | 1.000000 |
| PhcycC3H3_B+H                 | 4.18958e-13 | 1.000000 | 4.18958e-13 | 1.000000 |
| rad62                         | 4.04824e-13 | 1.000000 | 4.04824e-13 | 1.000000 |
| rad50                         | 2.82685e-13 | 1.000000 | 2.82685e-13 | 1.000000 |
| rad70                         | 5.67199e-14 | 1.000000 | 5.67199e-14 | 1.000000 |
| PAH1+H                        | 2.73381e-14 | 1.000000 | 2.73381e-14 | 1.000000 |
| rad55                         | 2.51238e-14 | 1.000000 | 2.51238e-14 | 1.000000 |
| rad52                         | 2.88230e-15 | 1.000000 | 2.88230e-15 | 1.000000 |
| rad58                         | 1.83839e-15 | 1.000000 | 1.83839e-15 | 1.000000 |
| rad34                         | 1.52728e-15 | 1.000000 | 1.52728e-15 | 1.000000 |
| rad51                         | 1.24135e-15 | 1.000000 | 1.24135e-15 | 1.000000 |
| rad41                         | 3.95301e-16 | 1.000000 | 3.95301e-16 | 1.000000 |
| rad42                         | 2.45818e-16 | 1.000000 | 2.45818e-16 | 1.000000 |
| rad65                         | 3.15109e-17 | 1.000000 | 3.15109e-17 | 1.000000 |
| rad53                         | 4.58586e-18 | 1.000000 | 4.58586e-18 | 1.000000 |
| rad64                         | 1.30071e-18 | 1.000000 | 1.30071e-18 | 1.000000 |
| rad61                         | 2.85227e-19 | 1.000000 | 2.85227e-19 | 1.000000 |
| rad56                         | 2.08041e-20 | 1.000000 | 2.08041e-20 | 1.000000 |
| rad6                          | 2.75029e-21 | 1.000000 | 2.75029e-21 | 1.000000 |
| rad68syn                      | 2.52150e-21 | 1.000000 | 2.52150e-21 | 1.000000 |
| rad68anti                     | 1.90876e-21 | 1.000000 | 1.90876e-21 | 1.000000 |
| rad40syn                      | 2.38313e-23 | 1.000000 | 2.38313e-23 | 1.000000 |

|           |             |         |             |         |
|-----------|-------------|---------|-------------|---------|
| rad40anti | 1.90760e-23 | 1.00000 | 1.90760e-23 | 1.00000 |
| PAH8+H    | 3.38038e-24 | 1.00000 | 3.38038e-24 | 1.00000 |
| rad28     | 2.59359e-24 | 1.00000 | 2.59359e-24 | 1.00000 |
| rad2      | 1.62000e-24 | 1.00000 | 1.62000e-24 | 1.00000 |
| rad73     | 9.42023e-25 | 1.00000 | 9.42023e-25 | 1.00000 |
| rad26     | 5.01912e-25 | 1.00000 | 5.01912e-25 | 1.00000 |
| rad7      | 2.09332e-25 | 1.00000 | 2.09332e-25 | 1.00000 |
| rad1      | 1.12779e-25 | 1.00000 | 1.12779e-25 | 1.00000 |
| rad10     | 8.38737e-26 | 1.00000 | 8.38737e-26 | 1.00000 |
| rad11     | 5.21604e-26 | 1.00000 | 5.21604e-26 | 1.00000 |
| rad3      | 1.00077e-26 | 1.00000 | 1.00077e-26 | 1.00000 |
| rad71     | 6.14176e-27 | 1.00000 | 6.14176e-27 | 1.00000 |
| rad19anti | 6.07793e-27 | 1.00000 | 6.07793e-27 | 1.00000 |
| rad4      | 5.18417e-27 | 1.00000 | 5.18417e-27 | 1.00000 |
| rad9      | 3.67241e-27 | 1.00000 | 3.67241e-27 | 1.00000 |
| rad13     | 1.16019e-27 | 1.00000 | 1.16019e-27 | 1.00000 |
| rad47     | 9.27534e-29 | 1.00000 | 9.27534e-29 | 1.00000 |
| rad33     | 2.23512e-30 | 1.00000 | 2.23512e-30 | 1.00000 |
| rad15     | 1.63660e-30 | 1.00000 | 1.63660e-30 | 1.00000 |
| rad14     | 1.42647e-30 | 1.00000 | 1.42647e-30 | 1.00000 |
| rad27     | 1.04299e-30 | 1.00000 | 1.04299e-30 | 1.00000 |
| rad25     | 8.31345e-31 | 1.00000 | 8.31345e-31 | 1.00000 |
| rad31     | 1.47799e-32 | 1.00000 | 1.47799e-32 | 1.00000 |
| rad23     | 2.55310e-33 | 1.00000 | 2.55310e-33 | 1.00000 |
| rad5      | 2.44997e-33 | 1.00000 | 2.44997e-33 | 1.00000 |
| rad45     | 2.15475e-35 | 1.00000 | 2.15475e-35 | 1.00000 |
| rad12     | 2.01069e-35 | 1.00000 | 2.01069e-35 | 1.00000 |
| rad20     | 1.61680e-35 | 1.00000 | 1.61680e-35 | 1.00000 |
| rad21     | 1.24630e-35 | 1.00000 | 1.24630e-35 | 1.00000 |
| rad19syn  | 1.11381e-35 | 1.00000 | 1.11381e-35 | 1.00000 |
| rad22     | 1.66055e-36 | 1.00000 | 1.66055e-36 | 1.00000 |
| rad36     | 1.35301e-36 | 1.00000 | 1.35301e-36 | 1.00000 |
| rad18     | 7.23378e-38 | 1.00000 | 7.23378e-38 | 1.00000 |
| rad24     | 2.34164e-42 | 1.00000 | 2.34164e-42 | 1.00000 |
| rad8      | 7.24343e-60 | 1.00000 | 7.24343e-60 | 1.00000 |

0.100000000E-02 Pa, 240.000000 K

=====

| Rate constant             | True (fraction)        | Effective (fraction)   |
|---------------------------|------------------------|------------------------|
| Total                     | 2.45462e-14 (1.00 )    | 2.45462e-14 (1.00 )    |
| Formation of rad19        | 2.45383e-14 (1.000 )   | 2.45383e-14 (1.000 )   |
| H-abstraction to cyc2enyl | 7.92234e-18 (0.000323) | 7.92234e-18 (0.000323) |
| H-abstraction to cyclenyl | 7.97958e-21 (3.25e-07) | 7.97958e-21 (3.25e-07) |

| species                       | PYtrue      | Cumul    | PYeffective | Cumul    |
|-------------------------------|-------------|----------|-------------|----------|
| Indene+H                      | 0.999241    | 0.999241 | 0.999241    | 0.999241 |
| PhCHCCH2+H                    | 0.000411191 | 0.999652 | 0.000411191 | 0.999652 |
| Benzene+cycloprop-2-enylidene | 0.000322752 | 0.999975 | 0.000322752 | 0.999975 |
| PhCCH+CH3                     | 7.38188e-06 | 0.999982 | 7.38188e-06 | 0.999982 |
| C2H2+PhCH2                    | 6.11540e-06 | 0.999989 | 6.11540e-06 | 0.999989 |
| PhCCCH3+H                     | 4.48333e-06 | 0.999993 | 4.48333e-06 | 0.999993 |
| Ph+MeAc                       | 3.92457e-06 | 0.999997 | 3.92457e-06 | 0.999997 |
| rad67                         | 1.14121e-06 | 0.999998 | 1.14121e-06 | 0.999998 |
| rad35                         | 4.87361e-07 | 0.999999 | 4.87361e-07 | 0.999999 |
| Ph+Allene                     | 4.81603e-07 | 0.999999 | 4.81603e-07 | 0.999999 |
| Benzene+cycloprop-1-enylidene | 3.25084e-07 | 0.999999 | 3.25084e-07 | 0.999999 |
| PhCH2CCH+H                    | 7.25414e-08 | 0.999999 | 7.25414e-08 | 0.999999 |
| PAH7+H                        | 5.26226e-08 | 0.999999 | 5.26226e-08 | 0.999999 |
| rad39                         | 1.48181e-08 | 0.999999 | 1.48181e-08 | 0.999999 |
| rad37                         | 1.45756e-08 | 1.000000 | 1.45756e-08 | 1.000000 |
| rad30                         | 9.38696e-09 | 1.000000 | 9.38696e-09 | 1.000000 |
| PAH9+H                        | 8.06607e-10 | 1.000000 | 8.06607e-10 | 1.000000 |
| rad38                         | 3.86280e-10 | 1.000000 | 3.86280e-10 | 1.000000 |
| PAH10+CH3                     | 6.19057e-11 | 1.000000 | 6.19057e-11 | 1.000000 |
| rad60syn                      | 5.88318e-11 | 1.000000 | 5.88318e-11 | 1.000000 |
| PhcycC3H3_A+H                 | 5.47108e-11 | 1.000000 | 5.47108e-11 | 1.000000 |
| PAH3+H                        | 3.74108e-11 | 1.000000 | 3.74108e-11 | 1.000000 |
| rad60anti                     | 2.96854e-11 | 1.000000 | 2.96854e-11 | 1.000000 |
| rad46                         | 2.54458e-11 | 1.000000 | 2.54458e-11 | 1.000000 |
| rad59                         | 7.20059e-12 | 1.000000 | 7.20059e-12 | 1.000000 |
| rad54                         | 2.25359e-12 | 1.000000 | 2.25359e-12 | 1.000000 |
| rad43                         | 2.10780e-12 | 1.000000 | 2.10780e-12 | 1.000000 |
| Phenyl+cycC3H4                | 8.50545e-13 | 1.000000 | 0.000000    | 1.000000 |
| PhcycC3H3_B+H                 | 6.80482e-13 | 1.000000 | 6.80482e-13 | 1.000000 |
| rad62                         | 4.71486e-13 | 1.000000 | 4.71486e-13 | 1.000000 |
| rad50                         | 3.31236e-13 | 1.000000 | 3.31236e-13 | 1.000000 |
| rad70                         | 7.10632e-14 | 1.000000 | 7.10632e-14 | 1.000000 |
| PAH1+H                        | 3.63128e-14 | 1.000000 | 3.63128e-14 | 1.000000 |

|           |             |          |             |          |
|-----------|-------------|----------|-------------|----------|
| rad55     | 3.14530e-14 | 1.000000 | 3.14530e-14 | 1.000000 |
| rad52     | 3.51254e-15 | 1.000000 | 3.51254e-15 | 1.000000 |
| rad58     | 2.35633e-15 | 1.000000 | 2.35633e-15 | 1.000000 |
| rad34     | 2.03751e-15 | 1.000000 | 2.03751e-15 | 1.000000 |
| rad51     | 1.58161e-15 | 1.000000 | 1.58161e-15 | 1.000000 |
| rad41     | 5.40323e-16 | 1.000000 | 5.40323e-16 | 1.000000 |
| rad42     | 3.27175e-16 | 1.000000 | 3.27175e-16 | 1.000000 |
| rad65     | 4.07841e-17 | 1.000000 | 4.07841e-17 | 1.000000 |
| rad53     | 7.54293e-18 | 1.000000 | 7.54293e-18 | 1.000000 |
| rad64     | 2.25702e-18 | 1.000000 | 2.25702e-18 | 1.000000 |
| rad61     | 5.84084e-19 | 1.000000 | 5.84084e-19 | 1.000000 |
| rad56     | 4.57198e-20 | 1.000000 | 4.57198e-20 | 1.000000 |
| rad68syn  | 5.68604e-21 | 1.000000 | 5.68604e-21 | 1.000000 |
| rad68anti | 4.27641e-21 | 1.000000 | 4.27641e-21 | 1.000000 |
| rad6      | 2.58080e-21 | 1.000000 | 2.58080e-21 | 1.000000 |
| rad40syn  | 6.78309e-23 | 1.000000 | 6.78309e-23 | 1.000000 |
| rad40anti | 5.41984e-23 | 1.000000 | 5.41984e-23 | 1.000000 |
| PAH8+H    | 1.13223e-23 | 1.000000 | 1.13223e-23 | 1.000000 |
| rad73     | 2.68338e-24 | 1.000000 | 2.68338e-24 | 1.000000 |
| rad28     | 2.40765e-24 | 1.000000 | 2.40765e-24 | 1.000000 |
| rad2      | 1.64850e-24 | 1.000000 | 1.64850e-24 | 1.000000 |
| rad26     | 5.54260e-25 | 1.000000 | 5.54260e-25 | 1.000000 |
| rad7      | 1.96618e-25 | 1.000000 | 1.96618e-25 | 1.000000 |
| rad1      | 1.15980e-25 | 1.000000 | 1.15980e-25 | 1.000000 |
| rad10     | 8.54463e-26 | 1.000000 | 8.54463e-26 | 1.000000 |
| rad11     | 4.90158e-26 | 1.000000 | 4.90158e-26 | 1.000000 |
| rad71     | 2.20092e-26 | 1.000000 | 2.20092e-26 | 1.000000 |
| rad19anti | 2.07806e-26 | 1.000000 | 2.07806e-26 | 1.000000 |
| rad3      | 1.00047e-26 | 1.000000 | 1.00047e-26 | 1.000000 |
| rad9      | 9.65275e-27 | 1.000000 | 9.65275e-27 | 1.000000 |
| rad4      | 5.19788e-27 | 1.000000 | 5.19788e-27 | 1.000000 |
| rad13     | 1.09343e-27 | 1.000000 | 1.09343e-27 | 1.000000 |
| rad47     | 1.03968e-28 | 1.000000 | 1.03968e-28 | 1.000000 |
| rad15     | 4.31166e-30 | 1.000000 | 4.31166e-30 | 1.000000 |
| rad33     | 2.11131e-30 | 1.000000 | 2.11131e-30 | 1.000000 |
| rad14     | 1.47411e-30 | 1.000000 | 1.47411e-30 | 1.000000 |
| rad27     | 1.07467e-30 | 1.000000 | 1.07467e-30 | 1.000000 |
| rad25     | 7.87000e-31 | 1.000000 | 7.87000e-31 | 1.000000 |
| rad31     | 4.05943e-32 | 1.000000 | 4.05943e-32 | 1.000000 |
| rad23     | 3.63917e-33 | 1.000000 | 3.63917e-33 | 1.000000 |
| rad5      | 2.22485e-33 | 1.000000 | 2.22485e-33 | 1.000000 |
| rad12     | 5.35772e-35 | 1.000000 | 5.35772e-35 | 1.000000 |
| rad19syn  | 4.33470e-35 | 1.000000 | 4.33470e-35 | 1.000000 |
| rad45     | 3.07280e-35 | 1.000000 | 3.07280e-35 | 1.000000 |
| rad20     | 1.65335e-35 | 1.000000 | 1.65335e-35 | 1.000000 |
| rad21     | 1.27978e-35 | 1.000000 | 1.27978e-35 | 1.000000 |
| rad36     | 1.93856e-36 | 1.000000 | 1.93856e-36 | 1.000000 |
| rad22     | 1.86589e-36 | 1.000000 | 1.86589e-36 | 1.000000 |
| rad18     | 7.33328e-38 | 1.000000 | 7.33328e-38 | 1.000000 |
| rad24     | 2.92730e-42 | 1.000000 | 2.92730e-42 | 1.000000 |
| rad8      | 1.32002e-59 | 1.000000 | 1.32002e-59 | 1.000000 |

0.100000000E-02 Pa, 250.000000 K

=====

| Rate constant             | True (fraction)        | Effective (fraction)   |
|---------------------------|------------------------|------------------------|
| Total                     | 2.71048e-14 (1.00 )    | 2.71048e-14 (1.00 )    |
| Formation of rad19        | 2.70930e-14 (1.000 )   | 2.70930e-14 (1.000 )   |
| H-abstraction to cyc2enyl | 1.17991e-17 (0.000435) | 1.17991e-17 (0.000435) |
| H-abstraction to cyclenyl | 1.59554e-20 (5.89e-07) | 1.59554e-20 (5.89e-07) |

| species                       | PYtrue      | Cumul    | PYeffective | Cumul    |
|-------------------------------|-------------|----------|-------------|----------|
| Indene+H                      | 0.999107    | 0.999107 | 0.999107    | 0.999107 |
| Benzene+cycloprop-2-enylidene | 0.000435312 | 0.999543 | 0.000435312 | 0.999543 |
| PhCHCCH2+H                    | 0.000431583 | 0.999974 | 0.000431583 | 0.999974 |
| PhCCH+CH3                     | 7.75713e-06 | 0.999982 | 7.75713e-06 | 0.999982 |
| C2H2+PhCH2                    | 6.51313e-06 | 0.999988 | 6.51313e-06 | 0.999988 |
| PhCCCH3+H                     | 4.74359e-06 | 0.999993 | 4.74359e-06 | 0.999993 |
| Ph+MeAc                       | 4.20680e-06 | 0.999997 | 4.20680e-06 | 0.999997 |
| rad67                         | 1.22016e-06 | 0.999999 | 1.22016e-06 | 0.999999 |
| Benzene+cycloprop-1-enylidene | 5.88656e-07 | 0.999999 | 5.88656e-07 | 0.999999 |
| Ph+Allene                     | 5.31436e-07 | 1.000000 | 5.31436e-07 | 1.000000 |
| rad35                         | 5.19663e-07 | 1.000000 | 5.19663e-07 | 1.000000 |
| PhCH2CCH+H                    | 8.14150e-08 | 1.000000 | 8.14150e-08 | 1.000000 |
| PAH7+H                        | 5.71680e-08 | 1.000000 | 5.71680e-08 | 1.000000 |
| rad39                         | 1.60884e-08 | 1.000000 | 1.60884e-08 | 1.000000 |
| rad37                         | 1.59137e-08 | 1.000000 | 1.59137e-08 | 1.000000 |
| rad30                         | 1.00426e-08 | 1.000000 | 1.00426e-08 | 1.000000 |
| PAH9+H                        | 8.83261e-10 | 1.000000 | 8.83261e-10 | 1.000000 |



|                |             |         |             |         |
|----------------|-------------|---------|-------------|---------|
| rad38          | 4.27967e-10 | 1.00000 | 4.27967e-10 | 1.00000 |
| PAH10+CH3      | 7.44041e-11 | 1.00000 | 7.44041e-11 | 1.00000 |
| PhcycC3H3_A+H  | 7.30899e-11 | 1.00000 | 7.30899e-11 | 1.00000 |
| rad60syn       | 6.48400e-11 | 1.00000 | 6.48400e-11 | 1.00000 |
| PAH3+H         | 4.28254e-11 | 1.00000 | 4.28254e-11 | 1.00000 |
| rad60anti      | 3.28037e-11 | 1.00000 | 3.28037e-11 | 1.00000 |
| rad46          | 2.83765e-11 | 1.00000 | 2.83765e-11 | 1.00000 |
| rad59          | 8.18965e-12 | 1.00000 | 8.18965e-12 | 1.00000 |
| rad54          | 2.70693e-12 | 1.00000 | 2.70693e-12 | 1.00000 |
| rad43          | 2.46608e-12 | 1.00000 | 2.46608e-12 | 1.00000 |
| Phenyl+cycC3H4 | 1.23952e-12 | 1.00000 | 0.00000     | 1.00000 |
| PhcycC3H3_B+H  | 1.09005e-12 | 1.00000 | 1.09005e-12 | 1.00000 |
| rad62          | 5.51565e-13 | 1.00000 | 5.51565e-13 | 1.00000 |
| rad50          | 3.90669e-13 | 1.00000 | 3.90669e-13 | 1.00000 |
| rad70          | 8.95605e-14 | 1.00000 | 8.95605e-14 | 1.00000 |
| PAH1+H         | 4.84505e-14 | 1.00000 | 4.84505e-14 | 1.00000 |
| rad55          | 3.96026e-14 | 1.00000 | 3.96026e-14 | 1.00000 |
| rad52          | 4.31242e-15 | 1.00000 | 4.31242e-15 | 1.00000 |
| rad58          | 3.03877e-15 | 1.00000 | 3.03877e-15 | 1.00000 |
| rad34          | 2.73055e-15 | 1.00000 | 2.73055e-15 | 1.00000 |
| rad51          | 2.03089e-15 | 1.00000 | 2.03089e-15 | 1.00000 |
| rad41          | 7.39629e-16 | 1.00000 | 7.39629e-16 | 1.00000 |
| rad42          | 4.36185e-16 | 1.00000 | 4.36185e-16 | 1.00000 |
| rad65          | 5.31749e-17 | 1.00000 | 5.31749e-17 | 1.00000 |
| rad53          | 1.22784e-17 | 1.00000 | 1.22784e-17 | 1.00000 |
| rad64          | 3.85149e-18 | 1.00000 | 3.85149e-18 | 1.00000 |
| rad61          | 1.15688e-18 | 1.00000 | 1.15688e-18 | 1.00000 |
| rad56          | 9.65492e-20 | 1.00000 | 9.65492e-20 | 1.00000 |
| rad68syn       | 1.22754e-20 | 1.00000 | 1.22754e-20 | 1.00000 |
| rad68anti      | 9.17582e-21 | 1.00000 | 9.17582e-21 | 1.00000 |
| rad6           | 2.60436e-21 | 1.00000 | 2.60436e-21 | 1.00000 |
| rad40syn       | 1.79830e-22 | 1.00000 | 1.79830e-22 | 1.00000 |
| rad40anti      | 1.43401e-22 | 1.00000 | 1.43401e-22 | 1.00000 |
| PAH8+H         | 3.45927e-23 | 1.00000 | 3.45927e-23 | 1.00000 |
| rad73          | 7.15463e-24 | 1.00000 | 7.15463e-24 | 1.00000 |
| rad28          | 2.38838e-24 | 1.00000 | 2.38838e-24 | 1.00000 |
| rad2           | 1.87387e-24 | 1.00000 | 1.87387e-24 | 1.00000 |
| rad26          | 6.72711e-25 | 1.00000 | 6.72711e-25 | 1.00000 |
| rad7           | 1.98632e-25 | 1.00000 | 1.98632e-25 | 1.00000 |
| rad1           | 1.33346e-25 | 1.00000 | 1.33346e-25 | 1.00000 |
| rad10          | 9.72509e-26 | 1.00000 | 9.72509e-26 | 1.00000 |
| rad19anti      | 7.31259e-26 | 1.00000 | 7.31259e-26 | 1.00000 |
| rad71          | 7.13344e-26 | 1.00000 | 7.13344e-26 | 1.00000 |
| rad11          | 4.95430e-26 | 1.00000 | 4.95430e-26 | 1.00000 |
| rad9           | 2.80203e-26 | 1.00000 | 2.80203e-26 | 1.00000 |
| rad3           | 1.11013e-26 | 1.00000 | 1.11013e-26 | 1.00000 |
| rad4           | 5.78604e-27 | 1.00000 | 5.78604e-27 | 1.00000 |
| rad13          | 1.10841e-27 | 1.00000 | 1.10841e-27 | 1.00000 |
| rad47          | 1.18423e-28 | 1.00000 | 1.18423e-28 | 1.00000 |
| rad15          | 1.25458e-29 | 1.00000 | 1.25458e-29 | 1.00000 |
| rad33          | 2.14541e-30 | 1.00000 | 2.14541e-30 | 1.00000 |
| rad14          | 1.68734e-30 | 1.00000 | 1.68734e-30 | 1.00000 |
| rad27          | 1.23549e-30 | 1.00000 | 1.23549e-30 | 1.00000 |
| rad25          | 8.00056e-31 | 1.00000 | 8.00056e-31 | 1.00000 |
| rad31          | 1.15674e-31 | 1.00000 | 1.15674e-31 | 1.00000 |
| rad23          | 7.51627e-33 | 1.00000 | 7.51627e-33 | 1.00000 |
| rad5           | 2.02814e-33 | 1.00000 | 2.02814e-33 | 1.00000 |
| rad19syn       | 1.76219e-34 | 1.00000 | 1.76219e-34 | 1.00000 |
| rad12          | 1.57803e-34 | 1.00000 | 1.57803e-34 | 1.00000 |
| rad45          | 6.35521e-35 | 1.00000 | 6.35521e-35 | 1.00000 |
| rad20          | 1.82320e-35 | 1.00000 | 1.82320e-35 | 1.00000 |
| rad21          | 1.41746e-35 | 1.00000 | 1.41746e-35 | 1.00000 |
| rad36          | 4.03050e-36 | 1.00000 | 4.03050e-36 | 1.00000 |
| rad22          | 2.82198e-36 | 1.00000 | 2.82198e-36 | 1.00000 |
| rad18          | 8.01107e-38 | 1.00000 | 8.01107e-38 | 1.00000 |
| rad24          | 4.35459e-42 | 1.00000 | 4.35459e-42 | 1.00000 |
| rad8           | 2.45935e-59 | 1.00000 | 2.45935e-59 | 1.00000 |

0.100000000E-02 Pa, 260.00000 K

| Rate constant             | True (fraction)        | Effective (fraction)   |             |          |
|---------------------------|------------------------|------------------------|-------------|----------|
| Total                     | 2.97464e-14 (1.00 )    | 2.97464e-14 (1.00 )    |             |          |
| Formation of rad19        | 2.97293e-14 (0.999 )   | 2.97293e-14 (0.999 )   |             |          |
| H-abstraction to cyc2enyl | 1.70236e-17 (0.000572) | 1.70236e-17 (0.000572) |             |          |
| H-abstraction to cyclenyl | 3.02186e-20 (1.02e-06) | 3.02186e-20 (1.02e-06) |             |          |
| species                   | PYtrue                 | Cumul                  | PYeffective | Cumul    |
| Indene+H                  | 0.998946               | 0.998946               | 0.998946    | 0.998946 |

|                               |             |          |             |          |
|-------------------------------|-------------|----------|-------------|----------|
| Benzene+cycloprop-2-enylidene | 0.000572291 | 0.999518 | 0.000572291 | 0.999518 |
| PhCHCCH2+H                    | 0.000453847 | 0.999972 | 0.000453847 | 0.999972 |
| PhCCH+CH3                     | 8.16524e-06 | 0.999980 | 8.16524e-06 | 0.999980 |
| C2H2+PhCH2                    | 6.95309e-06 | 0.999987 | 6.95309e-06 | 0.999987 |
| PhCCCH3+H                     | 5.02931e-06 | 0.999992 | 5.02931e-06 | 0.999992 |
| Ph+MeAc                       | 4.52057e-06 | 0.999997 | 4.52057e-06 | 0.999997 |
| rad67                         | 1.30785e-06 | 0.999998 | 1.30785e-06 | 0.999998 |
| Benzene+cycloprop-1-enylidene | 1.01588e-06 | 0.999999 | 1.01588e-06 | 0.999999 |
| Ph+Allene                     | 5.88581e-07 | 1.000000 | 5.88581e-07 | 1.000000 |
| rad35                         | 5.55456e-07 | 1.000000 | 5.55456e-07 | 1.000000 |
| PhCH2CCH+H                    | 9.17572e-08 | 1.000000 | 9.17572e-08 | 1.000000 |
| PAH7+H                        | 6.22980e-08 | 1.000000 | 6.22980e-08 | 1.000000 |
| rad39                         | 1.75199e-08 | 1.000000 | 1.75199e-08 | 1.000000 |
| rad37                         | 1.74316e-08 | 1.000000 | 1.74316e-08 | 1.000000 |
| rad30                         | 1.07731e-08 | 1.000000 | 1.07731e-08 | 1.000000 |
| PAH9+H                        | 9.70783e-10 | 1.000000 | 9.70783e-10 | 1.000000 |
| rad38                         | 4.76193e-10 | 1.000000 | 4.76193e-10 | 1.000000 |
| PhcycC3H3_A+H                 | 9.76899e-11 | 1.000000 | 9.76899e-11 | 1.000000 |
| PAH10+CH3                     | 8.98988e-11 | 1.000000 | 8.98988e-11 | 1.000000 |
| rad60syn                      | 7.17355e-11 | 1.000000 | 7.17355e-11 | 1.000000 |
| PAH3+H                        | 4.92714e-11 | 1.000000 | 4.92714e-11 | 1.000000 |
| rad60anti                     | 3.63915e-11 | 1.000000 | 3.63915e-11 | 1.000000 |
| rad46                         | 3.17846e-11 | 1.000000 | 3.17846e-11 | 1.000000 |
| rad59                         | 9.35924e-12 | 1.000000 | 9.35924e-12 | 1.000000 |
| rad54                         | 3.26885e-12 | 1.000000 | 3.26885e-12 | 1.000000 |
| rad43                         | 2.89819e-12 | 1.000000 | 2.89819e-12 | 1.000000 |
| Phenyl+cycC3H4                | 1.79997e-12 | 1.000000 | 0.000000    | 1.000000 |
| PhcycC3H3_B+H                 | 1.72357e-12 | 1.000000 | 1.72357e-12 | 1.000000 |
| rad62                         | 6.47837e-13 | 1.000000 | 6.47837e-13 | 1.000000 |
| rad50                         | 4.63624e-13 | 1.000000 | 4.63624e-13 | 1.000000 |
| rad70                         | 1.13451e-13 | 1.000000 | 1.13451e-13 | 1.000000 |
| PAH1+H                        | 6.48701e-14 | 1.000000 | 6.48701e-14 | 1.000000 |
| rad55                         | 5.01103e-14 | 1.000000 | 5.01103e-14 | 1.000000 |
| rad52                         | 5.33069e-15 | 1.000000 | 5.33069e-15 | 1.000000 |
| rad58                         | 3.93949e-15 | 1.000000 | 3.93949e-15 | 1.000000 |
| rad34                         | 3.67217e-15 | 1.000000 | 3.67217e-15 | 1.000000 |
| rad51                         | 2.62595e-15 | 1.000000 | 2.62595e-15 | 1.000000 |
| rad41                         | 1.01307e-15 | 1.000000 | 1.01307e-15 | 1.000000 |
| rad42                         | 5.82012e-16 | 1.000000 | 5.82012e-16 | 1.000000 |
| rad65                         | 6.97740e-17 | 1.000000 | 6.97740e-17 | 1.000000 |
| rad53                         | 1.97843e-17 | 1.000000 | 1.97843e-17 | 1.000000 |
| rad64                         | 6.46943e-18 | 1.000000 | 6.46943e-18 | 1.000000 |
| rad61                         | 2.22251e-18 | 1.000000 | 2.22251e-18 | 1.000000 |
| rad56                         | 1.96572e-19 | 1.000000 | 1.96572e-19 | 1.000000 |
| rad68syn                      | 2.54693e-20 | 1.000000 | 2.54693e-20 | 1.000000 |
| rad68anti                     | 1.89304e-20 | 1.000000 | 1.89304e-20 | 1.000000 |
| rad6                          | 2.86985e-21 | 1.000000 | 2.86985e-21 | 1.000000 |
| rad40syn                      | 4.46794e-22 | 1.000000 | 4.46794e-22 | 1.000000 |
| rad40anti                     | 3.55553e-22 | 1.000000 | 3.55553e-22 | 1.000000 |
| PAH8+H                        | 9.71812e-23 | 1.000000 | 9.71812e-23 | 1.000000 |
| rad73                         | 1.79363e-23 | 1.000000 | 1.79363e-23 | 1.000000 |
| rad28                         | 2.56928e-24 | 1.000000 | 2.56928e-24 | 1.000000 |
| rad2                          | 2.40984e-24 | 1.000000 | 2.40984e-24 | 1.000000 |
| rad26                         | 8.93398e-25 | 1.000000 | 8.93398e-25 | 1.000000 |
| rad19anti                     | 2.63520e-25 | 1.000000 | 2.63520e-25 | 1.000000 |
| rad7                          | 2.19151e-25 | 1.000000 | 2.19151e-25 | 1.000000 |
| rad71                         | 2.10954e-25 | 1.000000 | 2.10954e-25 | 1.000000 |
| rad1                          | 1.73603e-25 | 1.000000 | 1.73603e-25 | 1.000000 |
| rad10                         | 1.25237e-25 | 1.000000 | 1.25237e-25 | 1.000000 |
| rad9                          | 8.65752e-26 | 1.000000 | 8.65752e-26 | 1.000000 |
| rad11                         | 5.46908e-26 | 1.000000 | 5.46908e-26 | 1.000000 |
| rad3                          | 1.38804e-26 | 1.000000 | 1.38804e-26 | 1.000000 |
| rad4                          | 7.25960e-27 | 1.000000 | 7.25960e-27 | 1.000000 |
| rad13                         | 1.22715e-27 | 1.000000 | 1.22715e-27 | 1.000000 |
| rad47                         | 1.37171e-28 | 1.000000 | 1.37171e-28 | 1.000000 |
| rad15                         | 3.88587e-29 | 1.000000 | 3.88587e-29 | 1.000000 |
| rad33                         | 2.38133e-30 | 1.000000 | 2.38133e-30 | 1.000000 |
| rad14                         | 2.15556e-30 | 1.000000 | 2.15556e-30 | 1.000000 |
| rad27                         | 1.60087e-30 | 1.000000 | 1.60087e-30 | 1.000000 |
| rad25                         | 8.86225e-31 | 1.000000 | 8.86225e-31 | 1.000000 |
| rad31                         | 3.40610e-31 | 1.000000 | 3.40610e-31 | 1.000000 |
| rad23                         | 2.09828e-32 | 1.000000 | 2.09828e-32 | 1.000000 |
| rad5                          | 1.85526e-33 | 1.000000 | 1.85526e-33 | 1.000000 |
| rad19syn                      | 7.46104e-34 | 1.000000 | 7.46104e-34 | 1.000000 |
| rad12                         | 4.95176e-34 | 1.000000 | 4.95176e-34 | 1.000000 |
| rad45                         | 1.77827e-34 | 1.000000 | 1.77827e-34 | 1.000000 |
| rad20                         | 2.20156e-35 | 1.000000 | 2.20156e-35 | 1.000000 |
| rad21                         | 1.71955e-35 | 1.000000 | 1.71955e-35 | 1.000000 |
| rad36                         | 1.13439e-35 | 1.000000 | 1.13439e-35 | 1.000000 |
| rad22                         | 6.16023e-36 | 1.000000 | 6.16023e-36 | 1.000000 |

|       |             |         |             |         |
|-------|-------------|---------|-------------|---------|
| rad18 | 9.57589e-38 | 1.00000 | 9.57589e-38 | 1.00000 |
| rad24 | 8.21121e-42 | 1.00000 | 8.21121e-42 | 1.00000 |
| rad8  | 4.68687e-59 | 1.00000 | 4.68687e-59 | 1.00000 |

0.100000000E-02 Pa, 270.000000 K

```

=====
Rate constant      | True (fraction)      Effective (fraction)
-----
Total              | 3.24655e-14 (1.00   ) 3.24655e-14 (1.00   )
Formation of rad19| 3.24415e-14 (0.999   ) 3.24415e-14 (0.999   )
H-abstraction to cyc2enyl| 2.38790e-17 (0.000736) 2.38790e-17 (0.000736)
H-abstraction to cyc1enyl| 5.45397e-20 (1.68e-06) 5.45397e-20 (1.68e-06)

```

| species                       | PYtrue      | Cumul    | PYeffective | Cumul    |
|-------------------------------|-------------|----------|-------------|----------|
| Indene+H                      | 0.998755    | 0.998755 | 0.998755    | 0.998755 |
| Benzene+cycloprop-2-enylidene | 0.000735519 | 0.999491 | 0.000735519 | 0.999491 |
| PhCCH2+H                      | 0.000478145 | 0.999969 | 0.000478145 | 0.999969 |
| PhCCH+CH3                     | 8.60875e-06 | 0.999977 | 8.60875e-06 | 0.999977 |
| C2H2+PhCH2                    | 7.43962e-06 | 0.999985 | 7.43962e-06 | 0.999985 |
| PhCCCH3+H                     | 5.34285e-06 | 0.999990 | 5.34285e-06 | 0.999990 |
| Ph+MeAc                       | 4.86936e-06 | 0.999995 | 4.86936e-06 | 0.999995 |
| Benzene+cycloprop-1-enylidene | 1.67993e-06 | 0.999997 | 1.67993e-06 | 0.999997 |
| rad67                         | 1.40524e-06 | 0.999998 | 1.40524e-06 | 0.999998 |
| Ph+Allene                     | 6.54150e-07 | 0.999999 | 6.54150e-07 | 0.999999 |
| rad35                         | 5.95115e-07 | 0.999999 | 5.95115e-07 | 0.999999 |
| PhCH2CCH+H                    | 1.03821e-07 | 1.000000 | 1.03821e-07 | 1.000000 |
| PAH7+H                        | 6.80889e-08 | 1.000000 | 6.80889e-08 | 1.000000 |
| rad37                         | 1.91541e-08 | 1.000000 | 1.91541e-08 | 1.000000 |
| rad39                         | 1.91333e-08 | 1.000000 | 1.91333e-08 | 1.000000 |
| rad30                         | 1.15871e-08 | 1.000000 | 1.15871e-08 | 1.000000 |
| PAH9+H                        | 1.07080e-09 | 1.000000 | 1.07080e-09 | 1.000000 |
| rad38                         | 5.32052e-10 | 1.000000 | 5.32052e-10 | 1.000000 |
| PhcycC3H3_A+H                 | 1.30538e-10 | 1.000000 | 1.30538e-10 | 1.000000 |
| PAH10+CH3                     | 1.09133e-10 | 1.000000 | 1.09133e-10 | 1.000000 |
| rad60syn                      | 7.96560e-11 | 1.000000 | 7.96560e-11 | 1.000000 |
| PAH3+H                        | 5.69574e-11 | 1.000000 | 5.69574e-11 | 1.000000 |
| rad60anti                     | 4.05235e-11 | 1.000000 | 4.05235e-11 | 1.000000 |
| rad46                         | 3.57527e-11 | 1.000000 | 3.57527e-11 | 1.000000 |
| rad59                         | 1.07443e-11 | 1.000000 | 1.07443e-11 | 1.000000 |
| rad54                         | 3.96627e-12 | 1.000000 | 3.96627e-12 | 1.000000 |
| rad43                         | 3.41973e-12 | 1.000000 | 3.41973e-12 | 1.000000 |
| PhcycC3H3_B+H                 | 2.69151e-12 | 1.000000 | 2.69151e-12 | 1.000000 |
| Phenyl+cycC3H4                | 2.60320e-12 | 1.000000 | 0.000000    | 1.000000 |
| rad62                         | 7.63612e-13 | 1.000000 | 7.63612e-13 | 1.000000 |
| rad50                         | 5.53386e-13 | 1.000000 | 5.53386e-13 | 1.000000 |
| rad70                         | 1.44331e-13 | 1.000000 | 1.44331e-13 | 1.000000 |
| PAH1+H                        | 8.70688e-14 | 1.000000 | 8.70688e-14 | 1.000000 |
| rad55                         | 6.36675e-14 | 1.000000 | 6.36675e-14 | 1.000000 |
| rad52                         | 6.63022e-15 | 1.000000 | 6.63022e-15 | 1.000000 |
| rad58                         | 5.12939e-15 | 1.000000 | 5.12939e-15 | 1.000000 |
| rad34                         | 4.95078e-15 | 1.000000 | 4.95078e-15 | 1.000000 |
| rad51                         | 3.41583e-15 | 1.000000 | 3.41583e-15 | 1.000000 |
| rad41                         | 1.38731e-15 | 1.000000 | 1.38731e-15 | 1.000000 |
| rad42                         | 7.76655e-16 | 1.000000 | 7.76655e-16 | 1.000000 |
| rad65                         | 9.20478e-17 | 1.000000 | 9.20478e-17 | 1.000000 |
| rad53                         | 3.15525e-17 | 1.000000 | 3.15525e-17 | 1.000000 |
| rad64                         | 1.07022e-17 | 1.000000 | 1.07022e-17 | 1.000000 |
| rad61                         | 4.14940e-18 | 1.000000 | 4.14940e-18 | 1.000000 |
| rad56                         | 3.86740e-19 | 1.000000 | 3.86740e-19 | 1.000000 |
| rad68syn                      | 5.09260e-20 | 1.000000 | 5.09260e-20 | 1.000000 |
| rad68anti                     | 3.76559e-20 | 1.000000 | 3.76559e-20 | 1.000000 |
| rad6                          | 3.48552e-21 | 1.000000 | 3.48552e-21 | 1.000000 |
| rad40syn                      | 1.04541e-21 | 1.000000 | 1.04541e-21 | 1.000000 |
| rad40anti                     | 8.30240e-22 | 1.000000 | 8.30240e-22 | 1.000000 |
| PAH8+H                        | 2.52770e-22 | 1.000000 | 2.52770e-22 | 1.000000 |
| rad73                         | 4.24299e-23 | 1.000000 | 4.24299e-23 | 1.000000 |
| rad2                          | 3.49244e-24 | 1.000000 | 3.49244e-24 | 1.000000 |
| rad28                         | 3.02647e-24 | 1.000000 | 3.02647e-24 | 1.000000 |
| rad26                         | 1.28306e-24 | 1.000000 | 1.28306e-24 | 1.000000 |
| rad19anti                     | 9.67192e-25 | 1.000000 | 9.67192e-25 | 1.000000 |
| rad71                         | 5.73640e-25 | 1.000000 | 5.73640e-25 | 1.000000 |
| rad9                          | 2.78468e-25 | 1.000000 | 2.78468e-25 | 1.000000 |
| rad7                          | 2.66531e-25 | 1.000000 | 2.66531e-25 | 1.000000 |
| rad1                          | 2.54941e-25 | 1.000000 | 2.54941e-25 | 1.000000 |
| rad10                         | 1.81768e-25 | 1.000000 | 1.81768e-25 | 1.000000 |
| rad11                         | 6.65536e-26 | 1.000000 | 6.65536e-26 | 1.000000 |
| rad3                          | 1.95589e-26 | 1.000000 | 1.95589e-26 | 1.000000 |
| rad4                          | 1.02677e-26 | 1.000000 | 1.02677e-26 | 1.000000 |
| rad13                         | 1.49772e-27 | 1.000000 | 1.49772e-27 | 1.000000 |

|          |             |          |             |          |
|----------|-------------|----------|-------------|----------|
| rad47    | 1.61703e-28 | 1.000000 | 1.61703e-28 | 1.000000 |
| rad15    | 1.25307e-28 | 1.000000 | 1.25307e-28 | 1.000000 |
| rad14    | 3.05497e-30 | 1.000000 | 3.05497e-30 | 1.000000 |
| rad33    | 2.91426e-30 | 1.000000 | 2.91426e-30 | 1.000000 |
| rad27    | 2.32429e-30 | 1.000000 | 2.32429e-30 | 1.000000 |
| rad25    | 1.07940e-30 | 1.000000 | 1.07940e-30 | 1.000000 |
| rad31    | 1.03251e-30 | 1.000000 | 1.03251e-30 | 1.000000 |
| rad23    | 7.00618e-32 | 1.000000 | 7.00618e-32 | 1.000000 |
| rad19syn | 3.27847e-33 | 1.000000 | 3.27847e-33 | 1.000000 |
| rad5     | 1.70256e-33 | 1.000000 | 1.70256e-33 | 1.000000 |
| rad12    | 1.61921e-33 | 1.000000 | 1.61921e-33 | 1.000000 |
| rad45    | 5.95801e-34 | 1.000000 | 5.95801e-34 | 1.000000 |
| rad36    | 3.82529e-35 | 1.000000 | 3.82529e-35 | 1.000000 |
| rad20    | 2.93841e-35 | 1.000000 | 2.93841e-35 | 1.000000 |
| rad21    | 2.30627e-35 | 1.000000 | 2.30627e-35 | 1.000000 |
| rad22    | 1.80050e-35 | 1.000000 | 1.80050e-35 | 1.000000 |
| rad18    | 1.26419e-37 | 1.000000 | 1.26419e-37 | 1.000000 |
| rad24    | 2.01562e-41 | 1.000000 | 2.01562e-41 | 1.000000 |
| rad8     | 9.14155e-59 | 1.000000 | 9.14155e-59 | 1.000000 |

0.100000000E-02 Pa, 280.000000 K

| Rate constant             | True (fraction)        | Effective (fraction)   |
|---------------------------|------------------------|------------------------|
| Total                     | 3.52572e-14 (1.00 )    | 3.52572e-14 (1.00 )    |
| Formation of rad19        | 3.52244e-14 (0.999 )   | 3.52244e-14 (0.999 )   |
| H-abstraction to cyc2enyl | 3.26639e-17 (0.000926) | 3.26639e-17 (0.000926) |
| H-abstraction to cyclenyl | 9.42926e-20 (2.67e-06) | 9.42926e-20 (2.67e-06) |

| species                       | PYtrue      | Cumul    | PYeffective | Cumul    |
|-------------------------------|-------------|----------|-------------|----------|
| Indene+H                      | 0.998535    | 0.998535 | 0.998535    | 0.998535 |
| Benzene+cycloprop-2-enylidene | 0.000926445 | 0.999462 | 0.000926445 | 0.999462 |
| PhCHCCH2+H                    | 0.000504653 | 0.999966 | 0.000504653 | 0.999966 |
| PhCCH+CH3                     | 9.09033e-06 | 0.999976 | 9.09033e-06 | 0.999976 |
| C2H2+PhCH2                    | 7.97744e-06 | 0.999984 | 7.97744e-06 | 0.999984 |
| PhCCCH3+H                     | 5.68675e-06 | 0.999989 | 5.68675e-06 | 0.999989 |
| Ph+MeAc                       | 5.25695e-06 | 0.999994 | 5.25695e-06 | 0.999994 |
| Benzene+cycloprop-1-enylidene | 2.67442e-06 | 0.999997 | 2.67442e-06 | 0.999997 |
| rad67                         | 1.51340e-06 | 0.999999 | 1.51340e-06 | 0.999999 |
| Ph+Allene                     | 7.29411e-07 | 0.999999 | 7.29411e-07 | 0.999999 |
| rad35                         | 6.39045e-07 | 1.00000  | 6.39045e-07 | 1.00000  |
| PhCH2CCH+H                    | 1.17902e-07 | 1.00000  | 1.17902e-07 | 1.00000  |
| PAH7+H                        | 7.46256e-08 | 1.00000  | 7.46256e-08 | 1.00000  |
| rad37                         | 2.11093e-08 | 1.00000  | 2.11093e-08 | 1.00000  |
| rad39                         | 2.09513e-08 | 1.00000  | 2.09513e-08 | 1.00000  |
| rad30                         | 1.24940e-08 | 1.00000  | 1.24940e-08 | 1.00000  |
| PAH9+H                        | 1.18518e-09 | 1.00000  | 1.18518e-09 | 1.00000  |
| rad38                         | 5.96820e-10 | 1.00000  | 5.96820e-10 | 1.00000  |
| PhcycC3H3_A+H                 | 1.74264e-10 | 1.00000  | 1.74264e-10 | 1.00000  |
| PAH10+CH3                     | 1.33028e-10 | 1.00000  | 1.33028e-10 | 1.00000  |
| rad60syn                      | 8.87600e-11 | 1.00000  | 8.87600e-11 | 1.00000  |
| PAH3+H                        | 6.61329e-11 | 1.00000  | 6.61329e-11 | 1.00000  |
| rad60anti                     | 4.52854e-11 | 1.00000  | 4.52854e-11 | 1.00000  |
| rad46                         | 4.03779e-11 | 1.00000  | 4.03779e-11 | 1.00000  |
| rad59                         | 1.23861e-11 | 1.00000  | 1.23861e-11 | 1.00000  |
| rad54                         | 4.83243e-12 | 1.00000  | 4.83243e-12 | 1.00000  |
| PhcycC3H3_B+H                 | 4.15199e-12 | 1.00000  | 4.15199e-12 | 1.00000  |
| rad43                         | 4.04943e-12 | 1.00000  | 4.04943e-12 | 1.00000  |
| Phenyl+cycC3H4                | 3.74742e-12 | 1.00000  | 0.00000     | 1.00000  |
| rad62                         | 9.02830e-13 | 1.00000  | 9.02830e-13 | 1.00000  |
| rad50                         | 6.64025e-13 | 1.00000  | 6.64025e-13 | 1.00000  |
| rad70                         | 1.84245e-13 | 1.00000  | 1.84245e-13 | 1.00000  |
| PAH1+H                        | 1.17033e-13 | 1.00000  | 1.17033e-13 | 1.00000  |
| rad55                         | 8.11580e-14 | 1.00000  | 8.11580e-14 | 1.00000  |
| rad52                         | 8.29152e-15 | 1.00000  | 8.29152e-15 | 1.00000  |
| rad58                         | 6.70130e-15 | 1.00000  | 6.70130e-15 | 1.00000  |
| rad34                         | 6.68419e-15 | 1.00000  | 6.68419e-15 | 1.00000  |
| rad51                         | 4.46552e-15 | 1.00000  | 4.46552e-15 | 1.00000  |
| rad41                         | 1.89782e-15 | 1.00000  | 1.89782e-15 | 1.00000  |
| rad42                         | 1.03569e-15 | 1.00000  | 1.03569e-15 | 1.00000  |
| rad65                         | 1.21954e-16 | 1.00000  | 1.21954e-16 | 1.00000  |
| rad53                         | 4.97887e-17 | 1.00000  | 4.97887e-17 | 1.00000  |
| rad64                         | 1.74385e-17 | 1.00000  | 1.74385e-17 | 1.00000  |
| rad61                         | 7.53769e-18 | 1.00000  | 7.53769e-18 | 1.00000  |
| rad56                         | 7.36353e-19 | 1.00000  | 7.36353e-19 | 1.00000  |
| rad68syn                      | 9.83137e-20 | 1.00000  | 9.83137e-20 | 1.00000  |
| rad68anti                     | 7.23571e-20 | 1.00000  | 7.23571e-20 | 1.00000  |
| rad6                          | 4.66569e-21 | 1.00000  | 4.66569e-21 | 1.00000  |
| rad40syn                      | 2.31283e-21 | 1.00000  | 2.31283e-21 | 1.00000  |

|           |             |         |             |         |
|-----------|-------------|---------|-------------|---------|
| rad40anti | 1.83329e-21 | 1.00000 | 1.83329e-21 | 1.00000 |
| PAH8+H    | 6.12415e-22 | 1.00000 | 6.12415e-22 | 1.00000 |
| rad73     | 9.49986e-23 | 1.00000 | 9.49986e-23 | 1.00000 |
| rad2      | 5.60637e-24 | 1.00000 | 5.60637e-24 | 1.00000 |
| rad28     | 3.90760e-24 | 1.00000 | 3.90760e-24 | 1.00000 |
| rad19anti | 3.59422e-24 | 1.00000 | 3.59422e-24 | 1.00000 |
| rad26     | 1.96448e-24 | 1.00000 | 1.96448e-24 | 1.00000 |
| rad71     | 1.44432e-24 | 1.00000 | 1.44432e-24 | 1.00000 |
| rad9      | 9.19993e-25 | 1.00000 | 9.19993e-25 | 1.00000 |
| rad1      | 4.15096e-25 | 1.00000 | 4.15096e-25 | 1.00000 |
| rad7      | 3.57318e-25 | 1.00000 | 3.57318e-25 | 1.00000 |
| rad10     | 2.92254e-25 | 1.00000 | 2.92254e-25 | 1.00000 |
| rad11     | 8.92781e-26 | 1.00000 | 8.92781e-26 | 1.00000 |
| rad3      | 3.06273e-26 | 1.00000 | 3.06273e-26 | 1.00000 |
| rad4      | 1.61430e-26 | 1.00000 | 1.61430e-26 | 1.00000 |
| rad13     | 2.01506e-27 | 1.00000 | 2.01506e-27 | 1.00000 |
| rad15     | 4.15070e-28 | 1.00000 | 4.15070e-28 | 1.00000 |
| rad47     | 1.94145e-28 | 1.00000 | 1.94145e-28 | 1.00000 |
| rad14     | 4.72815e-30 | 1.00000 | 4.72815e-30 | 1.00000 |
| rad33     | 3.93220e-30 | 1.00000 | 3.93220e-30 | 1.00000 |
| rad27     | 3.71523e-30 | 1.00000 | 3.71523e-30 | 1.00000 |
| rad31     | 3.20921e-30 | 1.00000 | 3.20921e-30 | 1.00000 |
| rad25     | 1.44604e-30 | 1.00000 | 1.44604e-30 | 1.00000 |
| rad23     | 2.58985e-31 | 1.00000 | 2.58985e-31 | 1.00000 |
| rad19syn  | 1.48909e-32 | 1.00000 | 1.48909e-32 | 1.00000 |
| rad12     | 5.44428e-33 | 1.00000 | 5.44428e-33 | 1.00000 |
| rad45     | 2.21308e-33 | 1.00000 | 2.21308e-33 | 1.00000 |
| rad5      | 1.56713e-33 | 1.00000 | 1.56713e-33 | 1.00000 |
| rad36     | 1.43097e-34 | 1.00000 | 1.43097e-34 | 1.00000 |
| rad22     | 6.24061e-35 | 1.00000 | 6.24061e-35 | 1.00000 |
| rad20     | 4.33525e-35 | 1.00000 | 4.33525e-35 | 1.00000 |
| rad21     | 3.42007e-35 | 1.00000 | 3.42007e-35 | 1.00000 |
| rad18     | 1.84327e-37 | 1.00000 | 1.84327e-37 | 1.00000 |
| rad24     | 6.19902e-41 | 1.00000 | 6.19902e-41 | 1.00000 |
| rad8      | 1.82602e-58 | 1.00000 | 1.82602e-58 | 1.00000 |

0.100000000E-02 Pa, 290.000000 K

=====

| Rate constant             | True (fraction)        | Effective (fraction)   |
|---------------------------|------------------------|------------------------|
| Total                     | 3.81171e-14 (1.00 )    | 3.81171e-14 (1.00 )    |
| Formation of rad19        | 3.80733e-14 (0.999 )   | 3.80733e-14 (0.999 )   |
| H-abstraction to cyc2enyl | 4.36868e-17 (0.00115 ) | 4.36868e-17 (0.00115 ) |
| H-abstraction to cyclenyl | 1.56861e-19 (4.12e-06) | 1.56861e-19 (4.12e-06) |

| species                       | PYtrue      | Cumul    | PYeffective | Cumul    |
|-------------------------------|-------------|----------|-------------|----------|
| Indene+H                      | 0.998282    | 0.998282 | 0.998282    | 0.998282 |
| Benzene+cycloprop-2-enylidene | 0.00114612  | 0.999429 | 0.00114612  | 0.999429 |
| PhCHCCH2+H                    | 0.000533551 | 0.999962 | 0.000533551 | 0.999962 |
| PhCCH+CH3                     | 9.61272e-06 | 0.999972 | 9.61272e-06 | 0.999972 |
| C2H2+PhCH2                    | 8.57162e-06 | 0.999980 | 8.57162e-06 | 0.999980 |
| PhCCCH3+H                     | 6.06369e-06 | 0.999986 | 6.06369e-06 | 0.999986 |
| Ph+MeAc                       | 5.68747e-06 | 0.999992 | 5.68747e-06 | 0.999992 |
| Benzene+cycloprop-1-enylidene | 4.11523e-06 | 0.999996 | 4.11523e-06 | 0.999996 |
| rad67                         | 1.63346e-06 | 0.999998 | 1.63346e-06 | 0.999998 |
| Ph+Allene                     | 8.15803e-07 | 0.999999 | 8.15803e-07 | 0.999999 |
| rad35                         | 6.87688e-07 | 0.999999 | 6.87688e-07 | 0.999999 |
| PhCH2CCH+H                    | 1.34342e-07 | 0.999999 | 1.34342e-07 | 0.999999 |
| PAH7+H                        | 8.20027e-08 | 0.999999 | 8.20027e-08 | 0.999999 |
| rad37                         | 2.33284e-08 | 1.000000 | 2.33284e-08 | 1.000000 |
| rad39                         | 2.29991e-08 | 1.000000 | 2.29991e-08 | 1.000000 |
| rad30                         | 1.35042e-08 | 1.000000 | 1.35042e-08 | 1.000000 |
| PAH9+H                        | 1.31603e-09 | 1.000000 | 1.31603e-09 | 1.000000 |
| rad38                         | 6.71971e-10 | 1.000000 | 6.71971e-10 | 1.000000 |
| PhcycC3H3_A+H                 | 2.32248e-10 | 1.000000 | 2.32248e-10 | 1.000000 |
| PAH10+CH3                     | 1.62716e-10 | 1.000000 | 1.62716e-10 | 1.000000 |
| rad60syn                      | 9.92279e-11 | 1.000000 | 9.92279e-11 | 1.000000 |
| PAH3+H                        | 7.70950e-11 | 1.000000 | 7.70950e-11 | 1.000000 |
| rad60anti                     | 5.07755e-11 | 1.000000 | 5.07755e-11 | 1.000000 |
| rad46                         | 4.57732e-11 | 1.000000 | 4.57732e-11 | 1.000000 |
| rad59                         | 1.43337e-11 | 1.000000 | 1.43337e-11 | 1.000000 |
| PhcycC3H3_B+H                 | 6.32701e-12 | 1.000000 | 6.32701e-12 | 1.000000 |
| rad54                         | 5.90816e-12 | 1.000000 | 5.90816e-12 | 1.000000 |
| Phenyl+cycC3H4                | 5.36584e-12 | 1.000000 | 0.000000    | 1.000000 |
| rad43                         | 4.80965e-12 | 1.000000 | 4.80965e-12 | 1.000000 |
| rad62                         | 1.07015e-12 | 1.000000 | 1.07015e-12 | 1.000000 |
| rad50                         | 8.00559e-13 | 1.000000 | 8.00559e-13 | 1.000000 |
| rad70                         | 2.35793e-13 | 1.000000 | 2.35793e-13 | 1.000000 |
| PAH1+H                        | 1.57370e-13 | 1.000000 | 1.57370e-13 | 1.000000 |

|           |             |          |             |          |
|-----------|-------------|----------|-------------|----------|
| rad55     | 1.03701e-13 | 1.000000 | 1.03701e-13 | 1.000000 |
| rad52     | 1.04171e-14 | 1.000000 | 1.04171e-14 | 1.000000 |
| rad34     | 9.02771e-15 | 1.000000 | 9.02771e-15 | 1.000000 |
| rad58     | 8.77570e-15 | 1.000000 | 8.77570e-15 | 1.000000 |
| rad51     | 5.86043e-15 | 1.000000 | 5.86043e-15 | 1.000000 |
| rad41     | 2.59125e-15 | 1.000000 | 2.59125e-15 | 1.000000 |
| rad42     | 1.37910e-15 | 1.000000 | 1.37910e-15 | 1.000000 |
| rad65     | 1.62080e-16 | 1.000000 | 1.62080e-16 | 1.000000 |
| rad53     | 7.76832e-17 | 1.000000 | 7.76832e-17 | 1.000000 |
| rad64     | 2.79822e-17 | 1.000000 | 2.79822e-17 | 1.000000 |
| rad61     | 1.33318e-17 | 1.000000 | 1.33318e-17 | 1.000000 |
| rad56     | 1.35810e-18 | 1.000000 | 1.35810e-18 | 1.000000 |
| rad68syn  | 1.83478e-19 | 1.000000 | 1.83478e-19 | 1.000000 |
| rad68anti | 1.34477e-19 | 1.000000 | 1.34477e-19 | 1.000000 |
| rad6      | 6.82478e-21 | 1.000000 | 6.82478e-21 | 1.000000 |
| rad40syn  | 4.85491e-21 | 1.000000 | 4.85491e-21 | 1.000000 |
| rad40anti | 3.84147e-21 | 1.000000 | 3.84147e-21 | 1.000000 |
| PAH8+H    | 1.38964e-21 | 1.000000 | 1.38964e-21 | 1.000000 |
| rad73     | 2.01859e-22 | 1.000000 | 2.01859e-22 | 1.000000 |
| rad19anti | 1.34383e-23 | 1.000000 | 1.34383e-23 | 1.000000 |
| rad2      | 9.75731e-24 | 1.000000 | 9.75731e-24 | 1.000000 |
| rad28     | 5.48667e-24 | 1.000000 | 5.48667e-24 | 1.000000 |
| rad71     | 3.38820e-24 | 1.000000 | 3.38820e-24 | 1.000000 |
| rad26     | 3.16527e-24 | 1.000000 | 3.16527e-24 | 1.000000 |
| rad9      | 3.09337e-24 | 1.000000 | 3.09337e-24 | 1.000000 |
| rad1      | 7.33484e-25 | 1.000000 | 7.33484e-25 | 1.000000 |
| rad7      | 5.23530e-25 | 1.000000 | 5.23530e-25 | 1.000000 |
| rad10     | 5.09508e-25 | 1.000000 | 5.09508e-25 | 1.000000 |
| rad11     | 1.30892e-25 | 1.000000 | 1.30892e-25 | 1.000000 |
| rad3      | 5.22266e-26 | 1.000000 | 5.22266e-26 | 1.000000 |
| rad4      | 2.76467e-26 | 1.000000 | 2.76467e-26 | 1.000000 |
| rad13     | 2.96321e-27 | 1.000000 | 2.96321e-27 | 1.000000 |
| rad15     | 1.39941e-27 | 1.000000 | 1.39941e-27 | 1.000000 |
| rad47     | 2.37574e-28 | 1.000000 | 2.37574e-28 | 1.000000 |
| rad31     | 1.01834e-29 | 1.000000 | 1.01834e-29 | 1.000000 |
| rad14     | 7.84491e-30 | 1.000000 | 7.84491e-30 | 1.000000 |
| rad27     | 6.40369e-30 | 1.000000 | 6.40369e-30 | 1.000000 |
| rad33     | 5.80006e-30 | 1.000000 | 5.80006e-30 | 1.000000 |
| rad25     | 2.11365e-30 | 1.000000 | 2.11365e-30 | 1.000000 |
| rad23     | 1.02240e-30 | 1.000000 | 1.02240e-30 | 1.000000 |
| rad19syn  | 6.95957e-32 | 1.000000 | 6.95957e-32 | 1.000000 |
| rad12     | 1.86517e-32 | 1.000000 | 1.86517e-32 | 1.000000 |
| rad45     | 8.79568e-33 | 1.000000 | 8.79568e-33 | 1.000000 |
| rad5      | 1.44656e-33 | 1.000000 | 1.44656e-33 | 1.000000 |
| rad36     | 5.73124e-34 | 1.000000 | 5.73124e-34 | 1.000000 |
| rad22     | 2.37695e-34 | 1.000000 | 2.37695e-34 | 1.000000 |
| rad20     | 7.01069e-35 | 1.000000 | 7.01069e-35 | 1.000000 |
| rad21     | 5.56061e-35 | 1.000000 | 5.56061e-35 | 1.000000 |
| rad18     | 2.94307e-37 | 1.000000 | 2.94307e-37 | 1.000000 |
| rad24     | 2.22794e-40 | 1.000000 | 2.22794e-40 | 1.000000 |
| rad8      | 3.73798e-58 | 1.000000 | 3.73798e-58 | 1.000000 |

0.100000000E-02 Pa, 300.000000 K

=====

| Rate constant             | True (fraction)        | Effective (fraction)   |
|---------------------------|------------------------|------------------------|
| Total                     | 5.34809e-14 (1.00 )    | 5.34809e-14 (1.00 )    |
| Formation of rad19        | 5.34010e-14 (0.999 )   | 5.34010e-14 (0.999 )   |
| H-abstraction to cyc2enyl | 7.95823e-17 (0.00149 ) | 7.95823e-17 (0.00149 ) |
| H-abstraction to cyclenyl | 3.44981e-19 (6.45e-06) | 3.44981e-19 (6.45e-06) |

| species                       | PYtrue      | Cumul    | PYeffective | Cumul    |
|-------------------------------|-------------|----------|-------------|----------|
| Indene+H                      | 0.997939    | 0.997939 | 0.997939    | 0.997939 |
| Benzene+cycloprop-2-enylidene | 0.00148805  | 0.999427 | 0.00148805  | 0.999427 |
| PhCHCCH2+H                    | 0.000529814 | 0.999957 | 0.000529814 | 0.999957 |
| PhCCH+CH3                     | 1.04614e-05 | 0.999968 | 1.04614e-05 | 0.999968 |
| C2H2+PhCH2                    | 9.96256e-06 | 0.999978 | 9.96256e-06 | 0.999978 |
| Benzene+cycloprop-1-enylidene | 6.45054e-06 | 0.999984 | 6.45054e-06 | 0.999984 |
| PhCCCH3+H                     | 6.36714e-06 | 0.999990 | 6.36714e-06 | 0.999990 |
| Ph+MeAc                       | 5.99825e-06 | 0.999996 | 5.99825e-06 | 0.999996 |
| rad67                         | 1.76909e-06 | 0.999998 | 1.76909e-06 | 0.999998 |
| Ph+Allene                     | 8.18970e-07 | 0.999999 | 8.18970e-07 | 0.999999 |
| rad35                         | 7.31806e-07 | 1.000000 | 7.31806e-07 | 1.000000 |
| PhCH2CCH+H                    | 1.62464e-07 | 1.000000 | 1.62464e-07 | 1.000000 |
| PAH7+H                        | 1.00664e-07 | 1.000000 | 1.00664e-07 | 1.000000 |
| rad37                         | 2.83205e-08 | 1.000000 | 2.83205e-08 | 1.000000 |
| rad39                         | 2.48344e-08 | 1.000000 | 2.48344e-08 | 1.000000 |
| rad30                         | 1.39397e-08 | 1.000000 | 1.39397e-08 | 1.000000 |
| PAH9+H                        | 1.67894e-09 | 1.000000 | 1.67894e-09 | 1.000000 |

|                |             |         |             |         |
|----------------|-------------|---------|-------------|---------|
| rad38          | 7.72639e-10 | 1.00000 | 7.72639e-10 | 1.00000 |
| PhcycC3H3_A+H  | 3.25290e-10 | 1.00000 | 3.25290e-10 | 1.00000 |
| PAH10+CH3      | 2.37265e-10 | 1.00000 | 2.37265e-10 | 1.00000 |
| rad60syn       | 1.06834e-10 | 1.00000 | 1.06834e-10 | 1.00000 |
| PAH3+H         | 9.84711e-11 | 1.00000 | 9.84711e-11 | 1.00000 |
| rad60anti      | 5.51570e-11 | 1.00000 | 5.51570e-11 | 1.00000 |
| rad46          | 5.45631e-11 | 1.00000 | 5.45631e-11 | 1.00000 |
| rad59          | 1.67258e-11 | 1.00000 | 1.67258e-11 | 1.00000 |
| PhcycC3H3_B+H  | 1.05896e-11 | 1.00000 | 1.05896e-11 | 1.00000 |
| Phenyl+cycC3H4 | 8.20984e-12 | 1.00000 | 0.00000     | 1.00000 |
| rad54          | 7.66753e-12 | 1.00000 | 7.66753e-12 | 1.00000 |
| rad43          | 5.65556e-12 | 1.00000 | 5.65556e-12 | 1.00000 |
| rad62          | 1.25274e-12 | 1.00000 | 1.25274e-12 | 1.00000 |
| rad50          | 1.03313e-12 | 1.00000 | 1.03313e-12 | 1.00000 |
| rad70          | 3.13383e-13 | 1.00000 | 3.13383e-13 | 1.00000 |
| PAH1+H         | 1.93775e-13 | 1.00000 | 1.93775e-13 | 1.00000 |
| rad55          | 1.33838e-13 | 1.00000 | 1.33838e-13 | 1.00000 |
| rad52          | 1.45717e-14 | 1.00000 | 1.45717e-14 | 1.00000 |
| rad34          | 1.28518e-14 | 1.00000 | 1.28518e-14 | 1.00000 |
| rad58          | 1.11204e-14 | 1.00000 | 1.11204e-14 | 1.00000 |
| rad51          | 8.23935e-15 | 1.00000 | 8.23935e-15 | 1.00000 |
| rad41          | 3.58184e-15 | 1.00000 | 3.58184e-15 | 1.00000 |
| rad42          | 1.81925e-15 | 1.00000 | 1.81925e-15 | 1.00000 |
| rad65          | 2.32644e-16 | 1.00000 | 2.32644e-16 | 1.00000 |
| rad53          | 1.29480e-16 | 1.00000 | 1.29480e-16 | 1.00000 |
| rad64          | 4.98969e-17 | 1.00000 | 4.98969e-17 | 1.00000 |
| rad61          | 2.74863e-17 | 1.00000 | 2.74863e-17 | 1.00000 |
| rad6           | 4.44039e-18 | 1.00000 | 4.44039e-18 | 1.00000 |
| rad56          | 3.01521e-18 | 1.00000 | 3.01521e-18 | 1.00000 |
| rad68syn       | 3.96643e-19 | 1.00000 | 3.96643e-19 | 1.00000 |
| rad68anti      | 2.85688e-19 | 1.00000 | 2.85688e-19 | 1.00000 |
| rad19anti      | 1.46854e-19 | 1.00000 | 1.46854e-19 | 1.00000 |
| rad9           | 3.08352e-20 | 1.00000 | 3.08352e-20 | 1.00000 |
| rad2           | 2.61393e-20 | 1.00000 | 2.61393e-20 | 1.00000 |
| rad40syn       | 1.34589e-20 | 1.00000 | 1.34589e-20 | 1.00000 |
| rad40anti      | 1.02810e-20 | 1.00000 | 1.02810e-20 | 1.00000 |
| PAH8+H         | 5.53974e-21 | 1.00000 | 5.53974e-21 | 1.00000 |
| rad28          | 3.69648e-21 | 1.00000 | 3.69648e-21 | 1.00000 |
| rad26          | 3.44490e-21 | 1.00000 | 3.44490e-21 | 1.00000 |
| rad1           | 1.96970e-21 | 1.00000 | 1.96970e-21 | 1.00000 |
| rad10          | 1.49182e-21 | 1.00000 | 1.49182e-21 | 1.00000 |
| rad73          | 6.54847e-22 | 1.00000 | 6.54847e-22 | 1.00000 |
| rad7           | 3.92564e-22 | 1.00000 | 3.92564e-22 | 1.00000 |
| rad3           | 1.57449e-22 | 1.00000 | 1.57449e-22 | 1.00000 |
| rad11          | 9.59876e-23 | 1.00000 | 9.59876e-23 | 1.00000 |
| rad4           | 7.83002e-23 | 1.00000 | 7.83002e-23 | 1.00000 |
| rad71          | 2.13408e-23 | 1.00000 | 2.13408e-23 | 1.00000 |
| rad15          | 1.83049e-23 | 1.00000 | 1.83049e-23 | 1.00000 |
| rad23          | 9.84046e-24 | 1.00000 | 9.84046e-24 | 1.00000 |
| rad13          | 2.27203e-24 | 1.00000 | 2.27203e-24 | 1.00000 |
| rad45          | 1.27128e-25 | 1.00000 | 1.27128e-25 | 1.00000 |
| rad31          | 9.66606e-26 | 1.00000 | 9.66606e-26 | 1.00000 |
| rad27          | 1.90500e-26 | 1.00000 | 1.90500e-26 | 1.00000 |
| rad14          | 1.60072e-26 | 1.00000 | 1.60072e-26 | 1.00000 |
| rad19syn       | 1.12386e-26 | 1.00000 | 1.12386e-26 | 1.00000 |
| rad25          | 5.83235e-27 | 1.00000 | 5.83235e-27 | 1.00000 |
| rad33          | 5.47156e-27 | 1.00000 | 5.47156e-27 | 1.00000 |
| rad36          | 4.33287e-27 | 1.00000 | 4.33287e-27 | 1.00000 |
| rad22          | 2.35149e-27 | 1.00000 | 2.35149e-27 | 1.00000 |
| rad47          | 1.77279e-27 | 1.00000 | 1.77279e-27 | 1.00000 |
| rad12          | 4.20152e-28 | 1.00000 | 4.20152e-28 | 1.00000 |
| rad5           | 2.95036e-28 | 1.00000 | 2.95036e-28 | 1.00000 |
| rad72          | 4.67185e-30 | 1.00000 | 4.67185e-30 | 1.00000 |
| rad21          | 2.74520e-30 | 1.00000 | 2.74520e-30 | 1.00000 |
| rad20          | 2.21523e-30 | 1.00000 | 2.21523e-30 | 1.00000 |
| rad18          | 5.18175e-32 | 1.00000 | 5.18175e-32 | 1.00000 |
| rad24          | 2.60163e-33 | 1.00000 | 2.60163e-33 | 1.00000 |
| rad8           | 3.04207e-44 | 1.00000 | 3.04207e-44 | 1.00000 |

0.100000000E-02 Pa, 310.000000 K

| Rate constant             | True (fraction)        | Effective (fraction)   |
|---------------------------|------------------------|------------------------|
| Total                     | 5.92544e-14 (1.00)     | 5.92544e-14 (1.00)     |
| Formation of rad19        | 5.91462e-14 (0.998)    | 5.91462e-14 (0.998)    |
| H-abstraction to cyc2enyl | 1.07628e-16 (0.00182)  | 1.07628e-16 (0.00182)  |
| H-abstraction to cyclenyl | 5.62537e-19 (9.49e-06) | 5.62537e-19 (9.49e-06) |

  

| species | PYtrue | Cumul | PYeffective | Cumul |
|---------|--------|-------|-------------|-------|
| -----   | -----  | ----- | -----       | ----- |

|                               |             |          |             |          |
|-------------------------------|-------------|----------|-------------|----------|
| Indene+H                      | 0.997536    | 0.997536 | 0.997536    | 0.997536 |
| Benzene+cycloprop-2-enylidene | 0.00181637  | 0.999353 | 0.00181637  | 0.999353 |
| PhCHCCH2+H                    | 0.000599212 | 0.999952 | 0.000599212 | 0.999952 |
| PhCCH+CH3                     | 1.07899e-05 | 0.999963 | 1.07899e-05 | 0.999963 |
| C2H2+PhCH2                    | 9.94963e-06 | 0.999973 | 9.94963e-06 | 0.999973 |
| Benzene+cycloprop-1-enylidene | 9.49359e-06 | 0.999982 | 9.49359e-06 | 0.999982 |
| PhCCCH3+H                     | 6.92724e-06 | 0.999989 | 6.92724e-06 | 0.999989 |
| Ph+MeAc                       | 6.69434e-06 | 0.999996 | 6.69434e-06 | 0.999996 |
| rad67                         | 1.91404e-06 | 0.999998 | 1.91404e-06 | 0.999998 |
| Ph+Allene                     | 1.02850e-06 | 0.999999 | 1.02850e-06 | 0.999999 |
| rad35                         | 8.00937e-07 | 0.999999 | 8.00937e-07 | 0.999999 |
| PhCH2CCH+H                    | 1.75890e-07 | 1.000000 | 1.75890e-07 | 1.000000 |
| PAH7+H                        | 9.96885e-08 | 1.000000 | 9.96885e-08 | 1.000000 |
| rad37                         | 2.86984e-08 | 1.000000 | 2.86984e-08 | 1.000000 |
| rad39                         | 2.78936e-08 | 1.000000 | 2.78936e-08 | 1.000000 |
| rad30                         | 1.58793e-08 | 1.000000 | 1.58793e-08 | 1.000000 |
| PAH9+H                        | 1.63681e-09 | 1.000000 | 1.63681e-09 | 1.000000 |
| rad38                         | 8.60319e-10 | 1.000000 | 8.60319e-10 | 1.000000 |
| PhcycC3H3_A+H                 | 4.09102e-10 | 1.000000 | 4.09102e-10 | 1.000000 |
| PAH10+CH3                     | 2.45220e-10 | 1.000000 | 2.45220e-10 | 1.000000 |
| rad60syn                      | 1.25085e-10 | 1.000000 | 1.25085e-10 | 1.000000 |
| PAH3+H                        | 1.05827e-10 | 1.000000 | 1.05827e-10 | 1.000000 |
| rad60anti                     | 6.43934e-11 | 1.000000 | 6.43934e-11 | 1.000000 |
| rad46                         | 5.94051e-11 | 1.000000 | 5.94051e-11 | 1.000000 |
| rad59                         | 1.93816e-11 | 1.000000 | 1.93816e-11 | 1.000000 |
| PhcycC3H3_B+H                 | 1.41415e-11 | 1.000000 | 1.41415e-11 | 1.000000 |
| Phenyl+cycC3H4                | 1.07882e-11 | 1.000000 | 0.000000    | 1.000000 |
| rad54                         | 8.89556e-12 | 1.000000 | 8.89556e-12 | 1.000000 |
| rad43                         | 6.83072e-12 | 1.000000 | 6.83072e-12 | 1.000000 |
| rad62                         | 1.51158e-12 | 1.000000 | 1.51158e-12 | 1.000000 |
| rad50                         | 1.17691e-12 | 1.000000 | 1.17691e-12 | 1.000000 |
| rad70                         | 3.87545e-13 | 1.000000 | 3.87545e-13 | 1.000000 |
| PAH1+H                        | 2.83528e-13 | 1.000000 | 2.83528e-13 | 1.000000 |
| rad55                         | 1.69848e-13 | 1.000000 | 1.69848e-13 | 1.000000 |
| rad52                         | 1.66054e-14 | 1.000000 | 1.66054e-14 | 1.000000 |
| rad34                         | 1.64051e-14 | 1.000000 | 1.64051e-14 | 1.000000 |
| rad58                         | 1.50871e-14 | 1.000000 | 1.50871e-14 | 1.000000 |
| rad51                         | 1.01579e-14 | 1.000000 | 1.01579e-14 | 1.000000 |
| rad41                         | 4.78438e-15 | 1.000000 | 4.78438e-15 | 1.000000 |
| rad42                         | 2.42631e-15 | 1.000000 | 2.42631e-15 | 1.000000 |
| rad65                         | 2.87399e-16 | 1.000000 | 2.87399e-16 | 1.000000 |
| rad53                         | 1.82128e-16 | 1.000000 | 1.82128e-16 | 1.000000 |
| rad64                         | 6.86525e-17 | 1.000000 | 6.86525e-17 | 1.000000 |
| rad61                         | 3.85256e-17 | 1.000000 | 3.85256e-17 | 1.000000 |
| rad56                         | 4.20797e-18 | 1.000000 | 4.20797e-18 | 1.000000 |
| rad68syn                      | 5.79170e-19 | 1.000000 | 5.79170e-19 | 1.000000 |
| rad68anti                     | 4.21593e-19 | 1.000000 | 4.21593e-19 | 1.000000 |
| rad40syn                      | 1.84908e-20 | 1.000000 | 1.84908e-20 | 1.000000 |
| rad6                          | 1.80400e-20 | 1.000000 | 1.80400e-20 | 1.000000 |
| rad40anti                     | 1.45861e-20 | 1.000000 | 1.45861e-20 | 1.000000 |
| PAH8+H                        | 5.99115e-21 | 1.000000 | 5.99115e-21 | 1.000000 |
| rad73                         | 7.86964e-22 | 1.000000 | 7.86964e-22 | 1.000000 |
| rad19anti                     | 1.86204e-22 | 1.000000 | 1.86204e-22 | 1.000000 |
| rad9                          | 3.58272e-23 | 1.000000 | 3.58272e-23 | 1.000000 |
| rad2                          | 3.50707e-23 | 1.000000 | 3.50707e-23 | 1.000000 |
| rad71                         | 1.54163e-23 | 1.000000 | 1.54163e-23 | 1.000000 |
| rad28                         | 1.31647e-23 | 1.000000 | 1.31647e-23 | 1.000000 |
| rad26                         | 9.20986e-24 | 1.000000 | 9.20986e-24 | 1.000000 |
| rad1                          | 2.72606e-24 | 1.000000 | 2.72606e-24 | 1.000000 |
| rad10                         | 1.83815e-24 | 1.000000 | 1.83815e-24 | 1.000000 |
| rad7                          | 1.38896e-24 | 1.000000 | 1.38896e-24 | 1.000000 |
| rad11                         | 3.47751e-25 | 1.000000 | 3.47751e-25 | 1.000000 |
| rad3                          | 1.82240e-25 | 1.000000 | 1.82240e-25 | 1.000000 |
| rad4                          | 9.73956e-26 | 1.000000 | 9.73956e-26 | 1.000000 |
| rad15                         | 1.63004e-26 | 1.000000 | 1.63004e-26 | 1.000000 |
| rad13                         | 7.92147e-27 | 1.000000 | 7.92147e-27 | 1.000000 |
| rad47                         | 3.77556e-28 | 1.000000 | 3.77556e-28 | 1.000000 |
| rad31                         | 1.07056e-28 | 1.000000 | 1.07056e-28 | 1.000000 |
| rad14                         | 2.50126e-29 | 1.000000 | 2.50126e-29 | 1.000000 |
| rad27                         | 2.22897e-29 | 1.000000 | 2.22897e-29 | 1.000000 |
| rad23                         | 1.82214e-29 | 1.000000 | 1.82214e-29 | 1.000000 |
| rad33                         | 1.56080e-29 | 1.000000 | 1.56080e-29 | 1.000000 |
| rad25                         | 5.55504e-30 | 1.000000 | 5.55504e-30 | 1.000000 |
| rad19syn                      | 1.62279e-30 | 1.000000 | 1.62279e-30 | 1.000000 |
| rad12                         | 2.25130e-31 | 1.000000 | 2.25130e-31 | 1.000000 |
| rad45                         | 1.60235e-31 | 1.000000 | 1.60235e-31 | 1.000000 |
| rad36                         | 1.06238e-32 | 1.000000 | 1.06238e-32 | 1.000000 |
| rad22                         | 4.03260e-33 | 1.000000 | 4.03260e-33 | 1.000000 |
| rad5                          | 1.24239e-33 | 1.000000 | 1.24239e-33 | 1.000000 |
| rad20                         | 2.28637e-34 | 1.000000 | 2.28637e-34 | 1.000000 |



|       |             |          |             |          |
|-------|-------------|----------|-------------|----------|
| rad21 | 1.83478e-34 | 1.000000 | 1.83478e-34 | 1.000000 |
| rad18 | 9.32685e-37 | 1.000000 | 9.32685e-37 | 1.000000 |
| rad24 | 3.71880e-39 | 1.000000 | 3.71880e-39 | 1.000000 |
| rad8  | 1.69061e-57 | 1.000000 | 1.69061e-57 | 1.000000 |

0.100000000E-02 Pa, 400.000000 K

```

=====
Rate constant      | True (fraction)      Effective (fraction)
-----
Total              | 1.29463e-13 (1.00   ) 1.29463e-13 (1.00   )
Formation of rad19 | 1.28526e-13 (0.993  ) 1.28526e-13 (0.993  )
H-abstraction to cyc2enyl | 9.19357e-16 (0.00710) 9.19357e-16 (0.00710)
H-abstraction to cyclenyl | 1.69485e-17 (0.000131) 1.69485e-17 (0.000131)
=====
species            | PYtrue      Cumul      | PYeffective  Cumul
-----
Indene+H           | 0.991683    0.991683    | 0.991683    0.991683
Benzene+cycloprop-2-enylidene | 0.00710133  0.998784    | 0.00710133  0.998784
PhCHCCH2+H        | 0.00100586  0.999790    | 0.00100586  0.999790
Benzene+cycloprop-1-enylidene | 0.000130914 0.999921    | 0.000130914 0.999921
C2H2+PhCH2        | 2.22468e-05 0.999943    | 2.22468e-05 0.999943
PhCCH+CH3         | 1.95098e-05 0.999963    | 1.95098e-05 0.999963
Ph+MeAc           | 1.45179e-05 0.999977    | 1.45179e-05 0.999977
PhCCCH3+H         | 1.31952e-05 0.999990    | 1.31952e-05 0.999990
rad67             | 4.22167e-06 0.999994    | 4.22167e-06 0.999994
Ph+Allene         | 2.97389e-06 0.999997    | 2.97389e-06 0.999997
rad35             | 1.68909e-06 0.999999    | 1.68909e-06 0.999999
PhCH2CCH+H       | 6.93042e-07 1.000000    | 6.93042e-07 1.000000
PAH7+H            | 2.89755e-07 1.000000    | 2.89755e-07 1.000000
rad37             | 8.82204e-08 1.000000    | 8.82204e-08 1.000000
rad39             | 7.05182e-08 1.000000    | 7.05182e-08 1.000000
rad30             | 3.41245e-08 1.000000    | 3.41245e-08 1.000000
PAH9+H            | 5.67066e-09 1.000000    | 5.67066e-09 1.000000
PhcycC3H3_A+H    | 4.88900e-09 1.000000    | 4.88900e-09 1.000000
rad38             | 3.07434e-09 1.000000    | 3.07434e-09 1.000000
PAH10+CH3        | 1.94150e-09 1.000000    | 1.94150e-09 1.000000
PAH3+H            | 5.34448e-10 1.000000    | 5.34448e-10 1.000000
PhcycC3H3_B+H    | 4.15151e-10 1.000000    | 4.15151e-10 1.000000
rad60syn          | 3.79130e-10 1.000000    | 3.79130e-10 1.000000
rad46             | 2.31289e-10 1.000000    | 2.31289e-10 1.000000
Phenyl+cycC3H4   | 2.22328e-10 1.000000    | 0.000000    1.000000
rad60anti         | 2.01850e-10 1.000000    | 2.01850e-10 1.000000
rad59             | 8.49298e-11 1.000000    | 8.49298e-11 1.000000
rad54             | 6.39700e-11 1.000000    | 6.39700e-11 1.000000
rad43             | 3.46932e-11 1.000000    | 3.46932e-11 1.000000
rad50             | 8.28667e-12 1.000000    | 8.28667e-12 1.000000
rad62             | 7.28464e-12 1.000000    | 7.28464e-12 1.000000
rad70             | 3.85326e-12 1.000000    | 3.85326e-12 1.000000
PAH1+H           | 3.61001e-12 1.000000    | 3.61001e-12 1.000000
rad55             | 1.60053e-12 1.000000    | 1.60053e-12 1.000000
rad34             | 2.43950e-13 1.000000    | 2.43950e-13 1.000000
rad52             | 1.72575e-13 1.000000    | 1.72575e-13 1.000000
rad58             | 1.69180e-13 1.000000    | 1.69180e-13 1.000000
rad51             | 1.42864e-13 1.000000    | 1.42864e-13 1.000000
rad41             | 6.83260e-14 1.000000    | 6.83260e-14 1.000000
rad42             | 2.71733e-14 1.000000    | 2.71733e-14 1.000000
rad53             | 6.88016e-15 1.000000    | 6.88016e-15 1.000000
rad65             | 4.39172e-15 1.000000    | 4.39172e-15 1.000000
rad61             | 3.43038e-15 1.000000    | 3.43038e-15 1.000000
rad64             | 3.05833e-15 1.000000    | 3.05833e-15 1.000000
rad56             | 5.30923e-16 1.000000    | 5.30923e-16 1.000000
rad19anti         | 4.76708e-16 1.000000    | 4.76708e-16 1.000000
rad6              | 1.93691e-16 1.000000    | 1.93691e-16 1.000000
rad9              | 1.17021e-16 1.000000    | 1.17021e-16 1.000000
rad68syn          | 7.48243e-17 1.000000    | 7.48243e-17 1.000000
rad68anti         | 5.24834e-17 1.000000    | 5.24834e-17 1.000000
rad2              | 9.77910e-18 1.000000    | 9.77910e-18 1.000000
rad40syn          | 6.39130e-18 1.000000    | 6.39130e-18 1.000000
PAH8+H           | 5.94551e-18 1.000000    | 5.94551e-18 1.000000
rad40anti         | 4.74371e-18 1.000000    | 4.74371e-18 1.000000
rad23             | 9.83141e-19 1.000000    | 9.83141e-19 1.000000
rad1              | 9.10085e-19 1.000000    | 9.10085e-19 1.000000
rad10             | 5.67954e-19 1.000000    | 5.67954e-19 1.000000
rad73             | 4.85679e-19 1.000000    | 4.85679e-19 1.000000
rad26             | 2.96854e-19 1.000000    | 2.96854e-19 1.000000
rad28             | 8.34495e-20 1.000000    | 8.34495e-20 1.000000
rad3              | 7.68191e-20 1.000000    | 7.68191e-20 1.000000
rad15             | 7.37540e-20 1.000000    | 7.37540e-20 1.000000
rad71             | 4.97341e-20 1.000000    | 4.97341e-20 1.000000
rad45             | 4.88378e-20 1.000000    | 4.88378e-20 1.000000

```

|          |             |         |             |         |
|----------|-------------|---------|-------------|---------|
| rad4     | 4.04594e-20 | 1.00000 | 4.04594e-20 | 1.00000 |
| rad7     | 1.80011e-20 | 1.00000 | 1.80011e-20 | 1.00000 |
| rad11    | 4.49110e-21 | 1.00000 | 4.49110e-21 | 1.00000 |
| rad19syn | 2.04434e-21 | 1.00000 | 2.04434e-21 | 1.00000 |
| rad36    | 1.87692e-21 | 1.00000 | 1.87692e-21 | 1.00000 |
| rad31    | 5.03701e-22 | 1.00000 | 5.03701e-22 | 1.00000 |
| rad22    | 1.48152e-22 | 1.00000 | 1.48152e-22 | 1.00000 |
| rad13    | 1.10554e-22 | 1.00000 | 1.10554e-22 | 1.00000 |
| rad27    | 4.28744e-24 | 1.00000 | 4.28744e-24 | 1.00000 |
| rad12    | 2.22583e-24 | 1.00000 | 2.22583e-24 | 1.00000 |
| rad14    | 1.91829e-24 | 1.00000 | 1.91829e-24 | 1.00000 |
| rad72    | 7.32496e-25 | 1.00000 | 7.32496e-25 | 1.00000 |
| rad33    | 2.89653e-25 | 1.00000 | 2.89653e-25 | 1.00000 |
| rad25    | 9.86123e-26 | 1.00000 | 9.86123e-26 | 1.00000 |
| rad47    | 7.65187e-26 | 1.00000 | 7.65187e-26 | 1.00000 |
| rad21    | 3.39272e-28 | 1.00000 | 3.39272e-28 | 1.00000 |
| rad20    | 2.85972e-28 | 1.00000 | 2.85972e-28 | 1.00000 |
| rad5     | 2.00925e-28 | 1.00000 | 2.00925e-28 | 1.00000 |
| rad24    | 1.52785e-28 | 1.00000 | 1.52785e-28 | 1.00000 |
| rad18    | 5.39304e-30 | 1.00000 | 5.39304e-30 | 1.00000 |
| rad8     | 6.65052e-41 | 1.00000 | 6.65052e-41 | 1.00000 |

0.100000000E-02 Pa, 500.000000 K

| Rate constant             | True (fraction)        | Effective (fraction)   |
|---------------------------|------------------------|------------------------|
| Total                     | 2.52837e-13 (1.00 )    | 2.52837e-13 (1.00 )    |
| Formation of rad19        | 2.47941e-13 (0.981 )   | 2.47941e-13 (0.981 )   |
| H-abstraction to cyc2enyl | 4.69058e-15 (0.0186 )  | 4.69058e-15 (0.0186 )  |
| H-abstraction to cyclenyl | 2.05381e-16 (0.000812) | 2.05381e-16 (0.000812) |

| species                       | PYtrue      | Cumul    | PYeffective | Cumul    |
|-------------------------------|-------------|----------|-------------|----------|
| Indene+H                      | 0.978428    | 0.978428 | 0.978428    | 0.978428 |
| Benzene+cycloprop-2-enylidene | 0.0185518   | 0.996979 | 0.0185518   | 0.996979 |
| PhCHCCH2+H                    | 0.00202477  | 0.999004 | 0.00202477  | 0.999004 |
| Benzene+cycloprop-1-enylidene | 0.000812306 | 0.999816 | 0.000812306 | 0.999816 |
| C2H2+PhCH2                    | 5.13362e-05 | 0.999868 | 5.13362e-05 | 0.999868 |
| PhCCH+CH3                     | 3.71182e-05 | 0.999905 | 3.71182e-05 | 0.999905 |
| Ph+MeAc                       | 3.63101e-05 | 0.999941 | 3.63101e-05 | 0.999941 |
| PhCCCH3+H                     | 2.84449e-05 | 0.999970 | 2.84449e-05 | 0.999970 |
| Ph+Allene                     | 1.09469e-05 | 0.999981 | 1.09469e-05 | 0.999981 |
| rad67                         | 1.05822e-05 | 0.999991 | 1.05822e-05 | 0.999991 |
| rad35                         | 4.10935e-06 | 0.999995 | 4.10935e-06 | 0.999995 |
| PhCH2CCH+H                    | 2.95392e-06 | 0.999998 | 2.95392e-06 | 0.999998 |
| PAH7+H                        | 8.51562e-07 | 0.999999 | 8.51562e-07 | 0.999999 |
| rad37                         | 2.86678e-07 | 0.999999 | 2.86678e-07 | 0.999999 |
| rad39                         | 2.02117e-07 | 1.000000 | 2.02117e-07 | 1.000000 |
| rad30                         | 8.94923e-08 | 1.000000 | 8.94923e-08 | 1.000000 |
| PhcycC3H3_A+H                 | 5.02850e-08 | 1.000000 | 5.02850e-08 | 1.000000 |
| PAH9+H                        | 2.06879e-08 | 1.000000 | 2.06879e-08 | 1.000000 |
| PAH10+CH3                     | 1.44052e-08 | 1.000000 | 1.44052e-08 | 1.000000 |
| rad38                         | 1.31834e-08 | 1.000000 | 1.31834e-08 | 1.000000 |
| PhcycC3H3_B+H                 | 7.81107e-09 | 1.000000 | 7.81107e-09 | 1.000000 |
| Phenyl+cycC3H4                | 3.55660e-09 | 1.000000 | 0.000000    | 1.000000 |
| PAH3+H                        | 2.97649e-09 | 1.000000 | 2.97649e-09 | 1.000000 |
| rad60syn                      | 1.43183e-09 | 1.000000 | 1.43183e-09 | 1.000000 |
| rad46                         | 1.04913e-09 | 1.000000 | 1.04913e-09 | 1.000000 |
| rad60anti                     | 7.84373e-10 | 1.000000 | 7.84373e-10 | 1.000000 |
| rad54                         | 4.68690e-10 | 1.000000 | 4.68690e-10 | 1.000000 |
| rad59                         | 4.42102e-10 | 1.000000 | 4.42102e-10 | 1.000000 |
| rad43                         | 1.96278e-10 | 1.000000 | 1.96278e-10 | 1.000000 |
| rad50                         | 6.65687e-11 | 1.000000 | 6.65687e-11 | 1.000000 |
| PAH1+H                        | 4.68911e-11 | 1.000000 | 4.68911e-11 | 1.000000 |
| rad62                         | 3.77646e-11 | 1.000000 | 3.77646e-11 | 1.000000 |
| rad70                         | 3.76453e-11 | 1.000000 | 3.76453e-11 | 1.000000 |
| rad55                         | 1.50994e-11 | 1.000000 | 1.50994e-11 | 1.000000 |
| rad34                         | 3.22092e-12 | 1.000000 | 3.22092e-12 | 1.000000 |
| rad51                         | 2.08197e-12 | 1.000000 | 2.08197e-12 | 1.000000 |
| rad58                         | 2.05092e-12 | 1.000000 | 2.05092e-12 | 1.000000 |
| rad52                         | 1.88540e-12 | 1.000000 | 1.88540e-12 | 1.000000 |
| rad41                         | 8.63972e-13 | 1.000000 | 8.63972e-13 | 1.000000 |
| rad42                         | 2.74849e-13 | 1.000000 | 2.74849e-13 | 1.000000 |
| rad53                         | 1.70507e-13 | 1.000000 | 1.70507e-13 | 1.000000 |
| rad61                         | 1.40668e-13 | 1.000000 | 1.40668e-13 | 1.000000 |
| rad64                         | 7.73135e-14 | 1.000000 | 7.73135e-14 | 1.000000 |
| rad19anti                     | 6.68024e-14 | 1.000000 | 6.68024e-14 | 1.000000 |
| rad65                         | 6.64225e-14 | 1.000000 | 6.64225e-14 | 1.000000 |
| rad56                         | 2.62115e-14 | 1.000000 | 2.62115e-14 | 1.000000 |
| rad9                          | 1.86161e-14 | 1.000000 | 1.86161e-14 | 1.000000 |

|           |             |          |             |          |
|-----------|-------------|----------|-------------|----------|
| rad6      | 1.16329e-14 | 1.000000 | 1.16329e-14 | 1.000000 |
| rad68syn  | 3.88259e-15 | 1.000000 | 3.88259e-15 | 1.000000 |
| rad68anti | 2.67414e-15 | 1.000000 | 2.67414e-15 | 1.000000 |
| rad23     | 2.23909e-15 | 1.000000 | 2.23909e-15 | 1.000000 |
| rad2      | 1.86640e-15 | 1.000000 | 1.86640e-15 | 1.000000 |
| PAH8+H    | 8.47569e-16 | 1.000000 | 8.47569e-16 | 1.000000 |
| rad40syn  | 5.55786e-16 | 1.000000 | 5.55786e-16 | 1.000000 |
| rad40anti | 4.06575e-16 | 1.000000 | 4.06575e-16 | 1.000000 |
| rad45     | 2.96312e-16 | 1.000000 | 2.96312e-16 | 1.000000 |
| rad1      | 2.23544e-16 | 1.000000 | 2.23544e-16 | 1.000000 |
| rad10     | 8.92807e-17 | 1.000000 | 8.92807e-17 | 1.000000 |
| rad73     | 6.83642e-17 | 1.000000 | 6.83642e-17 | 1.000000 |
| rad3      | 2.26871e-17 | 1.000000 | 2.26871e-17 | 1.000000 |
| rad26     | 1.87433e-17 | 1.000000 | 1.87433e-17 | 1.000000 |
| rad36     | 1.55397e-17 | 1.000000 | 1.55397e-17 | 1.000000 |
| rad19syn  | 1.45990e-17 | 1.000000 | 1.45990e-17 | 1.000000 |
| rad71     | 1.35822e-17 | 1.000000 | 1.35822e-17 | 1.000000 |
| rad4      | 1.29061e-17 | 1.000000 | 1.29061e-17 | 1.000000 |
| rad15     | 1.26565e-17 | 1.000000 | 1.26565e-17 | 1.000000 |
| rad28     | 3.17792e-18 | 1.000000 | 3.17792e-18 | 1.000000 |
| rad7      | 1.16065e-18 | 1.000000 | 1.16065e-18 | 1.000000 |
| rad11     | 2.99679e-19 | 1.000000 | 2.99679e-19 | 1.000000 |
| rad22     | 2.10062e-19 | 1.000000 | 2.10062e-19 | 1.000000 |
| rad31     | 1.77647e-19 | 1.000000 | 1.77647e-19 | 1.000000 |
| rad13     | 7.89440e-21 | 1.000000 | 7.89440e-21 | 1.000000 |
| rad12     | 2.74486e-21 | 1.000000 | 2.74486e-21 | 1.000000 |
| rad72     | 2.09561e-21 | 1.000000 | 2.09561e-21 | 1.000000 |
| rad27     | 5.10409e-22 | 1.000000 | 5.10409e-22 | 1.000000 |
| rad14     | 1.57110e-22 | 1.000000 | 1.57110e-22 | 1.000000 |
| rad33     | 2.40700e-23 | 1.000000 | 2.40700e-23 | 1.000000 |
| rad47     | 5.02582e-24 | 1.000000 | 5.02582e-24 | 1.000000 |
| rad25     | 4.95483e-24 | 1.000000 | 4.95483e-24 | 1.000000 |
| rad24     | 2.54247e-25 | 1.000000 | 2.54247e-25 | 1.000000 |
| rad21     | 1.13938e-25 | 1.000000 | 1.13938e-25 | 1.000000 |
| rad20     | 9.20504e-26 | 1.000000 | 9.20504e-26 | 1.000000 |
| rad18     | 1.41499e-27 | 1.000000 | 1.41499e-27 | 1.000000 |
| rad5      | 1.76578e-28 | 1.000000 | 1.76578e-28 | 1.000000 |
| rad8      | 1.56293e-36 | 1.000000 | 1.56293e-36 | 1.000000 |

0.100000000E-02 Pa, 600.000000 K

=====

| Rate constant             | True (fraction)        | Effective (fraction)   |
|---------------------------|------------------------|------------------------|
| Total                     | 4.35570e-13 (1.00 )    | 4.35570e-13 (1.00 )    |
| Formation of rad19        | 4.18892e-13 (0.962 )   | 4.18892e-13 (0.962 )   |
| H-abstraction to cyc2enyl | 1.54751e-14 (0.0355 )  | 1.54751e-14 (0.0355 )  |
| H-abstraction to cyc1enyl | 1.20343e-15 (0.00276 ) | 1.20343e-15 (0.00276 ) |

| species                       | PYtrue      | Cumul    | PYeffective | Cumul    |
|-------------------------------|-------------|----------|-------------|----------|
| Indene+H                      | 0.957276    | 0.957276 | 0.957276    | 0.957276 |
| Benzene+cycloprop-2-enylidene | 0.0355285   | 0.992805 | 0.0355285   | 0.992805 |
| PhCHCCH2+H                    | 0.00402172  | 0.996826 | 0.00402172  | 0.996826 |
| Benzene+cycloprop-1-enylidene | 0.00276289  | 0.999589 | 0.00276289  | 0.999589 |
| C2H2+PhCH2                    | 0.000111945 | 0.999701 | 0.000111945 | 0.999701 |
| Ph+MeAc                       | 8.57420e-05 | 0.999787 | 8.57420e-05 | 0.999787 |
| PhCCH+CH3                     | 6.75064e-05 | 0.999854 | 6.75064e-05 | 0.999854 |
| PhCCCH3+H                     | 5.90383e-05 | 0.999913 | 5.90383e-05 | 0.999913 |
| Ph+Allene                     | 3.56628e-05 | 0.999949 | 3.56628e-05 | 0.999949 |
| rad67                         | 2.54029e-05 | 0.999975 | 2.54029e-05 | 0.999975 |
| PhCH2CCH+H                    | 1.09199e-05 | 0.999985 | 1.09199e-05 | 0.999985 |
| rad35                         | 9.63305e-06 | 0.999995 | 9.63305e-06 | 0.999995 |
| PAH7+H                        | 2.26706e-06 | 0.999997 | 2.26706e-06 | 0.999997 |
| rad37                         | 8.64905e-07 | 0.999998 | 8.64905e-07 | 0.999998 |
| rad39                         | 5.20249e-07 | 0.999999 | 5.20249e-07 | 0.999999 |
| PhcycC3H3_A+H                 | 3.56529e-07 | 0.999999 | 3.56529e-07 | 0.999999 |
| rad30                         | 2.27441e-07 | 0.999999 | 2.27441e-07 | 0.999999 |
| PAH10+CH3                     | 8.50920e-08 | 0.999999 | 8.50920e-08 | 0.999999 |
| PhcycC3H3_B+H                 | 8.43896e-08 | 0.999999 | 8.43896e-08 | 0.999999 |
| PAH9+H                        | 7.13070e-08 | 1.000000 | 7.13070e-08 | 1.000000 |
| rad38                         | 5.21311e-08 | 1.000000 | 5.21311e-08 | 1.000000 |
| Phenyl+cycC3H4                | 3.58023e-08 | 1.000000 | 0.000000    | 1.000000 |
| PAH3+H                        | 1.45691e-08 | 1.000000 | 1.45691e-08 | 1.000000 |
| rad60syn                      | 5.03972e-09 | 1.000000 | 5.03972e-09 | 1.000000 |
| rad46                         | 4.37622e-09 | 1.000000 | 4.37622e-09 | 1.000000 |
| rad60anti                     | 2.82886e-09 | 1.000000 | 2.82886e-09 | 1.000000 |
| rad54                         | 2.63022e-09 | 1.000000 | 2.63022e-09 | 1.000000 |
| rad59                         | 2.03126e-09 | 1.000000 | 2.03126e-09 | 1.000000 |
| rad43                         | 9.14302e-10 | 1.000000 | 9.14302e-10 | 1.000000 |
| rad50                         | 4.49076e-10 | 1.000000 | 4.49076e-10 | 1.000000 |

|           |             |          |             |          |
|-----------|-------------|----------|-------------|----------|
| PAH1+H    | 4.05905e-10 | 1.000000 | 4.05905e-10 | 1.000000 |
| rad70     | 2.63826e-10 | 1.000000 | 2.63826e-10 | 1.000000 |
| rad62     | 1.58022e-10 | 1.000000 | 1.58022e-10 | 1.000000 |
| rad55     | 1.01573e-10 | 1.000000 | 1.01573e-10 | 1.000000 |
| rad34     | 2.81348e-11 | 1.000000 | 2.81348e-11 | 1.000000 |
| rad51     | 2.21635e-11 | 1.000000 | 2.21635e-11 | 1.000000 |
| rad58     | 1.79744e-11 | 1.000000 | 1.79744e-11 | 1.000000 |
| rad52     | 1.61051e-11 | 1.000000 | 1.61051e-11 | 1.000000 |
| rad41     | 7.27828e-12 | 1.000000 | 7.27828e-12 | 1.000000 |
| rad61     | 2.69082e-12 | 1.000000 | 2.69082e-12 | 1.000000 |
| rad53     | 2.26526e-12 | 1.000000 | 2.26526e-12 | 1.000000 |
| rad42     | 1.88131e-12 | 1.000000 | 1.88131e-12 | 1.000000 |
| rad64     | 9.96176e-13 | 1.000000 | 9.96176e-13 | 1.000000 |
| rad65     | 7.15337e-13 | 1.000000 | 7.15337e-13 | 1.000000 |
| rad56     | 5.47642e-13 | 1.000000 | 5.47642e-13 | 1.000000 |
| rad19anti | 4.93442e-13 | 1.000000 | 4.93443e-13 | 1.000000 |
| rad9      | 1.78934e-13 | 1.000000 | 1.78934e-13 | 1.000000 |
| rad6      | 1.49103e-13 | 1.000000 | 1.49103e-13 | 1.000000 |
| rad23     | 9.77654e-14 | 1.000000 | 9.77654e-14 | 1.000000 |
| rad68syn  | 8.54725e-14 | 1.000000 | 8.54725e-14 | 1.000000 |
| rad68anti | 5.81396e-14 | 1.000000 | 5.81396e-14 | 1.000000 |
| rad2      | 5.38242e-14 | 1.000000 | 5.38242e-14 | 1.000000 |
| PAH8+H    | 3.69287e-14 | 1.000000 | 3.69287e-14 | 1.000000 |
| rad40syn  | 1.73292e-14 | 1.000000 | 1.73292e-14 | 1.000000 |
| rad45     | 1.51125e-14 | 1.000000 | 1.51125e-14 | 1.000000 |
| rad40anti | 1.26422e-14 | 1.000000 | 1.26422e-14 | 1.000000 |
| rad1      | 8.56509e-15 | 1.000000 | 8.56509e-15 | 1.000000 |
| rad73     | 3.38669e-15 | 1.000000 | 3.38669e-15 | 1.000000 |
| rad10     | 1.60722e-15 | 1.000000 | 1.60722e-15 | 1.000000 |
| rad19syn  | 1.52297e-15 | 1.000000 | 1.52297e-15 | 1.000000 |
| rad36     | 1.51785e-15 | 1.000000 | 1.51785e-15 | 1.000000 |
| rad71     | 1.05512e-15 | 1.000000 | 1.05512e-15 | 1.000000 |
| rad3      | 7.37769e-16 | 1.000000 | 7.37769e-16 | 1.000000 |
| rad4      | 4.96137e-16 | 1.000000 | 4.96137e-16 | 1.000000 |
| rad26     | 2.37157e-16 | 1.000000 | 2.37157e-16 | 1.000000 |
| rad15     | 1.18926e-16 | 1.000000 | 1.18926e-16 | 1.000000 |
| rad28     | 3.31103e-17 | 1.000000 | 3.31103e-17 | 1.000000 |
| rad7      | 1.65218e-17 | 1.000000 | 1.65218e-17 | 1.000000 |
| rad12     | 1.38850e-17 | 1.000000 | 1.38850e-17 | 1.000000 |
| rad22     | 8.17321e-18 | 1.000000 | 8.17321e-18 | 1.000000 |
| rad11     | 4.52346e-18 | 1.000000 | 4.52346e-18 | 1.000000 |
| rad31     | 3.24821e-18 | 1.000000 | 3.24821e-18 | 1.000000 |
| rad72     | 9.50689e-19 | 1.000000 | 9.50689e-19 | 1.000000 |
| rad13     | 1.34684e-19 | 1.000000 | 1.34684e-19 | 1.000000 |
| rad27     | 8.58756e-21 | 1.000000 | 8.58756e-21 | 1.000000 |
| rad14     | 2.27129e-21 | 1.000000 | 2.27129e-21 | 1.000000 |
| rad33     | 5.32484e-22 | 1.000000 | 5.32484e-22 | 1.000000 |
| rad47     | 1.30363e-22 | 1.000000 | 1.30363e-22 | 1.000000 |
| rad25     | 6.89914e-23 | 1.000000 | 6.89914e-23 | 1.000000 |
| rad24     | 2.21416e-23 | 1.000000 | 2.21416e-23 | 1.000000 |
| rad21     | 1.39534e-23 | 1.000000 | 1.39534e-23 | 1.000000 |
| rad20     | 8.07036e-24 | 1.000000 | 8.07036e-24 | 1.000000 |
| rad18     | 8.12602e-26 | 1.000000 | 8.12602e-26 | 1.000000 |
| rad5      | 2.19448e-28 | 1.000000 | 2.19448e-28 | 1.000000 |
| rad8      | 2.39372e-31 | 1.000000 | 2.39372e-31 | 1.000000 |

0.100000000E-02 Pa, 700.000000 K

=====

| Rate constant             | True (fraction)        | Effective (fraction)   |
|---------------------------|------------------------|------------------------|
| Total                     | 6.91694e-13 (1.00 )    | 6.91694e-13 (1.00 )    |
| Formation of rad19        | 6.47922e-13 (0.937 )   | 6.47922e-13 (0.937 )   |
| H-abstraction to cyc2enyl | 3.91858e-14 (0.0567 )  | 3.91858e-14 (0.0567 )  |
| H-abstraction to cyclenyl | 4.58543e-15 (0.00663 ) | 4.58542e-15 (0.00663 ) |

| species                       | PYtrue      | Cumul    | PYeffective | Cumul    |
|-------------------------------|-------------|----------|-------------|----------|
| Indene+H                      | 0.928261    | 0.928261 | 0.928261    | 0.928261 |
| Benzene+cycloprop-2-enylidene | 0.0566520   | 0.984913 | 0.0566520   | 0.984913 |
| PhCHCCH2+H                    | 0.00759851  | 0.992512 | 0.00759851  | 0.992512 |
| Benzene+cycloprop-1-enylidene | 0.00662927  | 0.999141 | 0.00662927  | 0.999141 |
| C2H2+PhCH2                    | 0.000223367 | 0.999364 | 0.000223367 | 0.999364 |
| Ph+MeAc                       | 0.000184762 | 0.999549 | 0.000184762 | 0.999549 |
| PhCCH+CH3                     | 0.000114475 | 0.999663 | 0.000114475 | 0.999663 |
| PhCCCH3+H                     | 0.000114174 | 0.999778 | 0.000114174 | 0.999778 |
| Ph+Allene                     | 9.86533e-05 | 0.999876 | 9.86533e-05 | 0.999876 |
| rad67                         | 5.61618e-05 | 0.999932 | 5.61618e-05 | 0.999932 |
| PhCH2CCH+H                    | 3.37385e-05 | 0.999966 | 3.37385e-05 | 0.999966 |
| rad35                         | 2.09202e-05 | 0.999987 | 2.09202e-05 | 0.999987 |
| PAH7+H                        | 5.25052e-06 | 0.999992 | 5.25052e-06 | 0.999992 |

|                |             |          |             |          |
|----------------|-------------|----------|-------------|----------|
| rad37          | 2.31770e-06 | 0.999995 | 2.31770e-06 | 0.999995 |
| PhcycC3H3_A+H  | 1.84668e-06 | 0.999997 | 1.84668e-06 | 0.999997 |
| rad39          | 1.15814e-06 | 0.999998 | 1.15814e-06 | 0.999998 |
| PhcycC3H3_B+H  | 5.97891e-07 | 0.999998 | 5.97891e-07 | 0.999998 |
| rad30          | 5.35177e-07 | 0.999999 | 5.35177e-07 | 0.999999 |
| PAH10+CH3      | 3.93625e-07 | 0.999999 | 3.93625e-07 | 0.999999 |
| Phenyl+cycC3H4 | 2.47273e-07 | 0.999999 | 0.00000     | 0.999999 |
| PAH9+H         | 2.20558e-07 | 1.000000 | 2.20558e-07 | 0.999999 |
| rad38          | 1.79348e-07 | 1.000000 | 1.79348e-07 | 1.000000 |
| PAH3+H         | 5.98816e-08 | 1.000000 | 5.98816e-08 | 1.000000 |
| rad46          | 1.59383e-08 | 1.000000 | 1.59383e-08 | 1.000000 |
| rad60syn       | 1.57198e-08 | 1.000000 | 1.57199e-08 | 1.000000 |
| rad54          | 1.11959e-08 | 1.000000 | 1.11959e-08 | 1.000000 |
| rad60anti      | 9.00503e-09 | 1.000000 | 9.00503e-09 | 1.000000 |
| rad59          | 7.88061e-09 | 1.000000 | 7.88061e-09 | 1.000000 |
| rad43          | 3.45953e-09 | 1.000000 | 3.45953e-09 | 1.000000 |
| PAH1+H         | 2.45995e-09 | 1.000000 | 2.45995e-09 | 1.000000 |
| rad50          | 2.44566e-09 | 1.000000 | 2.44566e-09 | 1.000000 |
| rad70          | 1.34939e-09 | 1.000000 | 1.34939e-09 | 1.000000 |
| rad62          | 5.31171e-10 | 1.000000 | 5.31171e-10 | 1.000000 |
| rad55          | 4.95201e-10 | 1.000000 | 4.95201e-10 | 1.000000 |
| rad51          | 1.72661e-10 | 1.000000 | 1.72661e-10 | 1.000000 |
| rad34          | 1.70512e-10 | 1.000000 | 1.70512e-10 | 1.000000 |
| rad58          | 1.15482e-10 | 1.000000 | 1.15482e-10 | 1.000000 |
| rad52          | 1.05445e-10 | 1.000000 | 1.05445e-10 | 1.000000 |
| rad41          | 4.33849e-11 | 1.000000 | 4.33849e-11 | 1.000000 |
| rad61          | 2.93834e-11 | 1.000000 | 2.93834e-11 | 1.000000 |
| rad53          | 1.83949e-11 | 1.000000 | 1.83949e-11 | 1.000000 |
| rad9           | 1.21406e-11 | 1.000000 | 1.21406e-11 | 1.000000 |
| rad42          | 9.22819e-12 | 1.000000 | 9.22819e-12 | 1.000000 |
| rad64          | 7.68989e-12 | 1.000000 | 7.68989e-12 | 1.000000 |
| rad56          | 6.14026e-12 | 1.000000 | 6.14026e-12 | 1.000000 |
| rad65          | 5.56219e-12 | 1.000000 | 5.56219e-12 | 1.000000 |
| rad68syn       | 1.01763e-12 | 1.000000 | 1.01764e-12 | 1.000000 |
| PAH8+H         | 7.27526e-13 | 1.000000 | 7.27526e-13 | 1.000000 |
| rad19anti      | 6.95730e-13 | 1.000000 | 6.95730e-13 | 1.000000 |
| rad68anti      | 6.85906e-13 | 1.000000 | 6.85907e-13 | 1.000000 |
| rad23          | 4.43856e-13 | 1.000000 | 4.43856e-13 | 1.000000 |
| rad6           | 4.17611e-13 | 1.000000 | 4.17611e-13 | 1.000000 |
| rad40syn       | 2.67932e-13 | 1.000000 | 2.67932e-13 | 1.000000 |
| rad2           | 2.09984e-13 | 1.000000 | 2.09984e-13 | 1.000000 |
| rad40anti      | 1.96411e-13 | 1.000000 | 1.96411e-13 | 1.000000 |
| rad73          | 8.05577e-14 | 1.000000 | 8.05578e-14 | 1.000000 |
| rad45          | 6.74453e-14 | 1.000000 | 6.74453e-14 | 1.000000 |
| rad1           | 4.88149e-14 | 1.000000 | 4.88149e-14 | 1.000000 |
| rad71          | 3.45139e-14 | 1.000000 | 3.45139e-14 | 1.000000 |
| rad12          | 1.17968e-14 | 1.000000 | 1.17968e-14 | 1.000000 |
| rad36          | 9.04286e-15 | 1.000000 | 9.04287e-15 | 1.000000 |
| rad19syn       | 8.87889e-15 | 1.000000 | 8.87889e-15 | 1.000000 |
| rad15          | 5.63591e-15 | 1.000000 | 5.63591e-15 | 1.000000 |
| rad10          | 5.14146e-15 | 1.000000 | 5.14146e-15 | 1.000000 |
| rad3           | 2.76281e-15 | 1.000000 | 2.76281e-15 | 1.000000 |
| rad4           | 2.18492e-15 | 1.000000 | 2.18492e-15 | 1.000000 |
| rad26          | 6.79663e-16 | 1.000000 | 6.79663e-16 | 1.000000 |
| rad28          | 9.28102e-17 | 1.000000 | 9.28103e-17 | 1.000000 |
| rad72          | 6.32527e-17 | 1.000000 | 6.32527e-17 | 1.000000 |
| rad7           | 5.37985e-17 | 1.000000 | 5.37986e-17 | 1.000000 |
| rad22          | 3.91409e-17 | 1.000000 | 3.91409e-17 | 1.000000 |
| rad11          | 1.60874e-17 | 1.000000 | 1.60874e-17 | 1.000000 |
| rad31          | 9.71078e-18 | 1.000000 | 9.71078e-18 | 1.000000 |
| rad13          | 6.04087e-19 | 1.000000 | 6.04087e-19 | 1.000000 |
| rad27          | 2.84899e-20 | 1.000000 | 2.84899e-20 | 1.000000 |
| rad24          | 2.01115e-20 | 1.000000 | 2.01115e-20 | 1.000000 |
| rad14          | 7.23096e-21 | 1.000000 | 7.23097e-21 | 1.000000 |
| rad33          | 4.16331e-21 | 1.000000 | 4.16331e-21 | 1.000000 |
| rad21          | 3.31373e-21 | 1.000000 | 3.31373e-21 | 1.000000 |
| rad47          | 1.29144e-21 | 1.000000 | 1.29144e-21 | 1.000000 |
| rad20          | 6.54965e-22 | 1.000000 | 6.54965e-22 | 1.000000 |
| rad25          | 2.91688e-22 | 1.000000 | 2.91688e-22 | 1.000000 |
| rad18          | 1.42894e-24 | 1.000000 | 1.42894e-24 | 1.000000 |
| rad8           | 5.34071e-26 | 1.000000 | 5.34071e-26 | 1.000000 |
| rad5           | 4.24455e-28 | 1.000000 | 4.24456e-28 | 1.000000 |

0.100000000E-02 Pa, 800.000000 K

| Rate constant             | True (fraction)       | Effective (fraction)  |
|---------------------------|-----------------------|-----------------------|
| Total                     | 1.03759e-12 (1.00 )   | 1.03758e-12 (1.00 )   |
| Formation of rad19        | 9.41065e-13 (0.907 )  | 9.41063e-13 (0.907 )  |
| H-abstraction to cyc2enyl | 8.32953e-14 (0.0803 ) | 8.32953e-14 (0.0803 ) |

H-abstraction to cyclenyl | 1.32261e-14 (0.0127 ) 1.32261e-14 (0.0127 )

| species                       | PYtrue      | Cumul    | PYeffective | Cumul    |
|-------------------------------|-------------|----------|-------------|----------|
| Indene+H                      | 0.891851    | 0.891851 | 0.891852    | 0.891852 |
| Benzene+cycloprop-2-enylidene | 0.0802780   | 0.972129 | 0.0802781   | 0.972130 |
| PhCHCCH2+H                    | 0.0134622   | 0.985591 | 0.0134623   | 0.985592 |
| Benzene+cycloprop-1-enylidene | 0.0127470   | 0.998338 | 0.0127470   | 0.998339 |
| C2H2+PhCH2                    | 0.000407098 | 0.998746 | 0.000407098 | 0.998747 |
| Ph+MeAc                       | 0.000361138 | 0.999107 | 0.000361138 | 0.999108 |
| Ph+Allene                     | 0.000232338 | 0.999339 | 0.000232338 | 0.999340 |
| PhCCCH3+H                     | 0.000203971 | 0.999543 | 0.000203971 | 0.999544 |
| PhCCH+CH3                     | 0.000180552 | 0.999724 | 0.000180553 | 0.999725 |
| rad67                         | 0.000113174 | 0.999837 | 0.000113174 | 0.999838 |
| PhCH2CCH+H                    | 8.77931e-05 | 0.999924 | 8.77933e-05 | 0.999925 |
| rad35                         | 4.16129e-05 | 0.999966 | 4.16129e-05 | 0.999967 |
| PAH7+H                        | 1.05800e-05 | 0.999977 | 1.05800e-05 | 0.999978 |
| PhcycC3H3_A+H                 | 7.41209e-06 | 0.999984 | 7.41210e-06 | 0.999985 |
| rad37                         | 5.46662e-06 | 0.999990 | 5.46663e-06 | 0.999991 |
| PhcycC3H3_B+H                 | 3.06124e-06 | 0.999993 | 3.06124e-06 | 0.999994 |
| rad39                         | 2.23427e-06 | 0.999995 | 2.23428e-06 | 0.999996 |
| PAH10+CH3                     | 1.45373e-06 | 0.999996 | 1.45373e-06 | 0.999997 |
| Phenyl+cycC3H4                | 1.26413e-06 | 0.999998 | 0.00000     | 0.999997 |
| rad30                         | 1.14933e-06 | 0.999999 | 1.14933e-06 | 0.999998 |
| PAH9+H                        | 6.06283e-07 | 0.999999 | 6.06284e-07 | 0.999999 |
| rad38                         | 5.31255e-07 | 1.000000 | 5.31256e-07 | 1.000000 |
| PAH3+H                        | 2.06535e-07 | 1.000000 | 2.06535e-07 | 1.000000 |
| rad46                         | 5.03839e-08 | 1.000000 | 5.03840e-08 | 1.000000 |
| rad60syn                      | 4.30113e-08 | 1.000000 | 4.30114e-08 | 1.000000 |
| rad54                         | 3.72615e-08 | 1.000000 | 3.72616e-08 | 1.000000 |
| rad59                         | 2.58004e-08 | 1.000000 | 2.58004e-08 | 1.000000 |
| rad60anti                     | 2.50612e-08 | 1.000000 | 2.50612e-08 | 1.000000 |
| PAH1+H                        | 1.11102e-08 | 1.000000 | 1.11103e-08 | 1.000000 |
| rad50                         | 1.08531e-08 | 1.000000 | 1.08531e-08 | 1.000000 |
| rad43                         | 1.08255e-08 | 1.000000 | 1.08256e-08 | 1.000000 |
| rad70                         | 5.27764e-09 | 1.000000 | 5.27765e-09 | 1.000000 |
| rad55                         | 1.83175e-09 | 1.000000 | 1.83175e-09 | 1.000000 |
| rad62                         | 1.46956e-09 | 1.000000 | 1.46956e-09 | 1.000000 |
| rad51                         | 1.02144e-09 | 1.000000 | 1.02144e-09 | 1.000000 |
| rad34                         | 7.64056e-10 | 1.000000 | 7.64057e-10 | 1.000000 |
| rad58                         | 5.66068e-10 | 1.000000 | 5.66068e-10 | 1.000000 |
| rad52                         | 5.41778e-10 | 1.000000 | 5.41779e-10 | 1.000000 |
| rad9                          | 5.29427e-10 | 1.000000 | 5.29428e-10 | 1.000000 |
| rad61                         | 2.09074e-10 | 1.000000 | 2.09074e-10 | 1.000000 |
| rad41                         | 1.94595e-10 | 1.000000 | 1.94596e-10 | 1.000000 |
| rad53                         | 1.01501e-10 | 1.000000 | 1.01501e-10 | 1.000000 |
| rad56                         | 4.31937e-11 | 1.000000 | 4.31937e-11 | 1.000000 |
| rad64                         | 4.01364e-11 | 1.000000 | 4.01365e-11 | 1.000000 |
| rad42                         | 3.44814e-11 | 1.000000 | 3.44815e-11 | 1.000000 |
| rad65                         | 3.26038e-11 | 1.000000 | 3.26038e-11 | 1.000000 |
| PAH8+H                        | 8.11533e-12 | 1.000000 | 8.11534e-12 | 1.000000 |
| rad68syn                      | 7.66856e-12 | 1.000000 | 7.66856e-12 | 1.000000 |
| rad68anti                     | 5.13235e-12 | 1.000000 | 5.13235e-12 | 1.000000 |
| rad40syn                      | 2.48643e-12 | 1.000000 | 2.48644e-12 | 1.000000 |
| rad40anti                     | 1.83898e-12 | 1.000000 | 1.83898e-12 | 1.000000 |
| rad73                         | 1.11447e-12 | 1.000000 | 1.11447e-12 | 1.000000 |
| rad23                         | 7.41809e-13 | 1.000000 | 7.41810e-13 | 1.000000 |
| rad12                         | 6.62446e-13 | 1.000000 | 6.62447e-13 | 1.000000 |
| rad71                         | 6.08935e-13 | 1.000000 | 6.08936e-13 | 1.000000 |
| rad19anti                     | 6.02835e-13 | 1.000000 | 6.02835e-13 | 1.000000 |
| rad6                          | 4.86676e-13 | 1.000000 | 4.86677e-13 | 1.000000 |
| rad2                          | 2.86041e-13 | 1.000000 | 2.86042e-13 | 1.000000 |
| rad15                         | 1.54588e-13 | 1.000000 | 1.54588e-13 | 1.000000 |
| rad45                         | 1.41201e-13 | 1.000000 | 1.41201e-13 | 1.000000 |
| rad1                          | 8.04525e-14 | 1.000000 | 8.04526e-14 | 1.000000 |
| rad36                         | 1.70327e-14 | 1.000000 | 1.70327e-14 | 1.000000 |
| rad19syn                      | 1.44428e-14 | 1.000000 | 1.44428e-14 | 1.000000 |
| rad10                         | 7.33467e-15 | 1.000000 | 7.33468e-15 | 1.000000 |
| rad3                          | 3.42980e-15 | 1.000000 | 3.42981e-15 | 1.000000 |
| rad4                          | 2.79799e-15 | 1.000000 | 2.79799e-15 | 1.000000 |
| rad72                         | 2.04922e-15 | 1.000000 | 2.04922e-15 | 1.000000 |
| rad26                         | 8.48070e-16 | 1.000000 | 8.48071e-16 | 1.000000 |
| rad28                         | 1.16036e-16 | 1.000000 | 1.16037e-16 | 1.000000 |
| rad7                          | 7.81367e-17 | 1.000000 | 7.81369e-17 | 1.000000 |
| rad22                         | 7.07056e-17 | 1.000000 | 7.07057e-17 | 1.000000 |
| rad11                         | 2.64693e-17 | 1.000000 | 2.64693e-17 | 1.000000 |
| rad31                         | 1.51028e-17 | 1.000000 | 1.51028e-17 | 1.000000 |
| rad24                         | 4.04479e-18 | 1.000000 | 4.04480e-18 | 1.000000 |
| rad13                         | 1.45595e-18 | 1.000000 | 1.45595e-18 | 1.000000 |
| rad21                         | 1.34685e-18 | 1.000000 | 1.34685e-18 | 1.000000 |

|       |             |         |             |         |
|-------|-------------|---------|-------------|---------|
| rad33 | 2.45707e-19 | 1.00000 | 2.45707e-19 | 1.00000 |
| rad20 | 2.18000e-19 | 1.00000 | 2.18000e-19 | 1.00000 |
| rad27 | 4.48354e-20 | 1.00000 | 4.48355e-20 | 1.00000 |
| rad14 | 1.06968e-20 | 1.00000 | 1.06968e-20 | 1.00000 |
| rad47 | 8.53969e-21 | 1.00000 | 8.53970e-21 | 1.00000 |
| rad25 | 4.07455e-21 | 1.00000 | 4.07456e-21 | 1.00000 |
| rad8  | 2.39853e-21 | 1.00000 | 2.39853e-21 | 1.00000 |
| rad18 | 1.62248e-23 | 1.00000 | 1.62249e-23 | 1.00000 |
| rad5  | 1.43662e-27 | 1.00000 | 1.43663e-27 | 1.00000 |

0.100000000E-02 Pa, 900.000000 K

| Rate constant             | True (fraction)       | Effective (fraction)  |
|---------------------------|-----------------------|-----------------------|
| Total                     | 1.49199e-12 (1.00 )   | 1.49199e-12 (1.00 )   |
| Formation of rad19        | 1.30395e-12 (0.874 )  | 1.30394e-12 (0.874 )  |
| H-abstraction to cyc2enyl | 1.56554e-13 (0.105 )  | 1.56554e-13 (0.105 )  |
| H-abstraction to cyc1enyl | 3.14892e-14 (0.0211 ) | 3.14890e-14 (0.0211 ) |

| species                       | PYtrue      | Cumul    | PYeffective | Cumul    |
|-------------------------------|-------------|----------|-------------|----------|
| Indene+H                      | 0.848699    | 0.848699 | 0.848703    | 0.848703 |
| Benzene+cycloprop-2-enylidene | 0.104929    | 0.953628 | 0.104930    | 0.953634 |
| PhCHCCH2+H                    | 0.0222941   | 0.975922 | 0.0222941   | 0.975928 |
| Benzene+cycloprop-1-enylidene | 0.0211054   | 0.997028 | 0.0211054   | 0.997033 |
| C2H2+PhCH2                    | 0.000683868 | 0.997712 | 0.000683872 | 0.997717 |
| Ph+MeAc                       | 0.000643403 | 0.998355 | 0.000643407 | 0.998360 |
| Ph+Allene                     | 0.000474185 | 0.998829 | 0.000474187 | 0.998835 |
| PhCCCH3+H                     | 0.000337156 | 0.999166 | 0.000337157 | 0.999172 |
| PhCCH+CH3                     | 0.000266833 | 0.999433 | 0.000266834 | 0.999439 |
| rad67                         | 0.000208252 | 0.999641 | 0.000208253 | 0.999647 |
| PhCH2CCH+H                    | 0.000196563 | 0.999838 | 0.000196563 | 0.999843 |
| rad35                         | 7.58729e-05 | 0.999914 | 7.58733e-05 | 0.999919 |
| PhcycC3H3_A+H                 | 2.42103e-05 | 0.999938 | 2.42105e-05 | 0.999943 |
| PAH7+H                        | 1.88375e-05 | 0.999957 | 1.88376e-05 | 0.999962 |
| PhcycC3H3_B+H                 | 1.21561e-05 | 0.999969 | 1.21561e-05 | 0.999974 |
| rad37                         | 1.14050e-05 | 0.999980 | 1.14050e-05 | 0.999986 |
| Phenyl+cycC3H4                | 5.07995e-06 | 0.999986 | 0.00000     | 0.999986 |
| PAH10+CH3                     | 4.40463e-06 | 0.999990 | 4.40465e-06 | 0.999990 |
| rad39                         | 3.79886e-06 | 0.999994 | 3.79888e-06 | 0.999994 |
| rad30                         | 2.25163e-06 | 0.999996 | 2.25165e-06 | 0.999996 |
| PAH9+H                        | 1.48864e-06 | 0.999997 | 1.48865e-06 | 0.999998 |
| rad38                         | 1.36505e-06 | 0.999999 | 1.36505e-06 | 0.999999 |
| PAH3+H                        | 6.06189e-07 | 0.999999 | 6.06192e-07 | 1.000000 |
| rad46                         | 1.39483e-07 | 1.000000 | 1.39484e-07 | 1.000000 |
| rad60syn                      | 1.03783e-07 | 1.000000 | 1.03784e-07 | 1.000000 |
| rad54                         | 1.00667e-07 | 1.000000 | 1.00667e-07 | 1.000000 |
| rad59                         | 7.22572e-08 | 1.000000 | 7.22576e-08 | 1.000000 |
| rad60anti                     | 6.13423e-08 | 1.000000 | 6.13427e-08 | 1.000000 |
| rad50                         | 4.00796e-08 | 1.000000 | 4.00798e-08 | 1.000000 |
| PAH1+H                        | 3.94735e-08 | 1.000000 | 3.94737e-08 | 1.000000 |
| rad43                         | 2.87032e-08 | 1.000000 | 2.87034e-08 | 1.000000 |
| rad70                         | 1.65408e-08 | 1.000000 | 1.65409e-08 | 1.000000 |
| rad55                         | 5.38701e-09 | 1.000000 | 5.38704e-09 | 1.000000 |
| rad51                         | 4.77156e-09 | 1.000000 | 4.77158e-09 | 1.000000 |
| rad62                         | 3.44637e-09 | 1.000000 | 3.44639e-09 | 1.000000 |
| rad9                          | 3.27835e-09 | 1.000000 | 3.27836e-09 | 1.000000 |
| rad34                         | 2.67895e-09 | 1.000000 | 2.67895e-09 | 1.000000 |
| rad52                         | 2.25244e-09 | 1.000000 | 2.25245e-09 | 1.000000 |
| rad58                         | 2.20460e-09 | 1.000000 | 2.20461e-09 | 1.000000 |
| rad61                         | 1.06258e-09 | 1.000000 | 1.06259e-09 | 1.000000 |
| rad41                         | 6.91197e-10 | 1.000000 | 6.91200e-10 | 1.000000 |
| rad53                         | 4.12670e-10 | 1.000000 | 4.12672e-10 | 1.000000 |
| rad56                         | 2.12374e-10 | 1.000000 | 2.12376e-10 | 1.000000 |
| rad64                         | 1.54860e-10 | 1.000000 | 1.54861e-10 | 1.000000 |
| rad65                         | 1.50325e-10 | 1.000000 | 1.50326e-10 | 1.000000 |
| rad42                         | 1.03377e-10 | 1.000000 | 1.03378e-10 | 1.000000 |
| PAH8+H                        | 5.91240e-11 | 1.000000 | 5.91243e-11 | 1.000000 |
| rad68syn                      | 4.07146e-11 | 1.000000 | 4.07149e-11 | 1.000000 |
| rad68anti                     | 2.70955e-11 | 1.000000 | 2.70956e-11 | 1.000000 |
| rad40syn                      | 1.56743e-11 | 1.000000 | 1.56744e-11 | 1.000000 |
| rad40anti                     | 1.17167e-11 | 1.000000 | 1.17168e-11 | 1.000000 |
| rad73                         | 1.01716e-11 | 1.000000 | 1.01716e-11 | 1.000000 |
| rad71                         | 6.75822e-12 | 1.000000 | 6.75826e-12 | 1.000000 |
| rad12                         | 4.04566e-12 | 1.000000 | 4.04569e-12 | 1.000000 |
| rad23                         | 8.15661e-13 | 1.000000 | 8.15666e-13 | 1.000000 |
| rad15                         | 7.69551e-13 | 1.000000 | 7.69555e-13 | 1.000000 |
| rad19anti                     | 4.57501e-13 | 1.000000 | 4.57504e-13 | 1.000000 |
| rad6                          | 3.43979e-13 | 1.000000 | 3.43981e-13 | 1.000000 |
| rad2                          | 2.60945e-13 | 1.000000 | 2.60947e-13 | 1.000000 |

|          |             |         |             |         |
|----------|-------------|---------|-------------|---------|
| rad45    | 1.90908e-13 | 1.00000 | 1.90909e-13 | 1.00000 |
| rad1     | 7.61051e-14 | 1.00000 | 7.61055e-14 | 1.00000 |
| rad72    | 3.85213e-14 | 1.00000 | 3.85215e-14 | 1.00000 |
| rad36    | 2.11621e-14 | 1.00000 | 2.11623e-14 | 1.00000 |
| rad19syn | 1.51735e-14 | 1.00000 | 1.51736e-14 | 1.00000 |
| rad10    | 7.15685e-15 | 1.00000 | 7.15688e-15 | 1.00000 |
| rad3     | 2.81161e-15 | 1.00000 | 2.81162e-15 | 1.00000 |
| rad4     | 2.31811e-15 | 1.00000 | 2.31811e-15 | 1.00000 |
| rad26    | 6.51343e-16 | 1.00000 | 6.51347e-16 | 1.00000 |
| rad21    | 1.24322e-16 | 1.00000 | 1.24322e-16 | 1.00000 |
| rad28    | 8.93664e-17 | 1.00000 | 8.93672e-17 | 1.00000 |
| rad22    | 8.45043e-17 | 1.00000 | 8.45048e-17 | 1.00000 |
| rad24    | 8.13234e-17 | 1.00000 | 8.13238e-17 | 1.00000 |
| rad7     | 7.57688e-17 | 1.00000 | 7.57691e-17 | 1.00000 |
| rad11    | 2.97059e-17 | 1.00000 | 2.97061e-17 | 1.00000 |
| rad20    | 2.39466e-17 | 1.00000 | 2.39467e-17 | 1.00000 |
| rad31    | 1.88478e-17 | 1.00000 | 1.88478e-17 | 1.00000 |
| rad33    | 1.64507e-17 | 1.00000 | 1.64508e-17 | 1.00000 |
| rad13    | 5.80730e-18 | 1.00000 | 5.80733e-18 | 1.00000 |
| rad8     | 5.47272e-18 | 1.00000 | 5.47274e-18 | 1.00000 |
| rad27    | 2.55982e-19 | 1.00000 | 2.55982e-19 | 1.00000 |
| rad25    | 2.46540e-19 | 1.00000 | 2.46542e-19 | 1.00000 |
| rad47    | 4.17567e-20 | 1.00000 | 4.17569e-20 | 1.00000 |
| rad14    | 2.53975e-20 | 1.00000 | 2.53977e-20 | 1.00000 |
| rad18    | 4.19976e-22 | 1.00000 | 4.19978e-22 | 1.00000 |
| rad5     | 8.34326e-27 | 1.00000 | 8.34330e-27 | 1.00000 |

0.100000000E-02 Pa, 1000.00000 K

| Rate constant             | True (fraction)       | Effective (fraction)  |
|---------------------------|-----------------------|-----------------------|
| Total                     | 2.07591e-12 (1.00 )   | 2.07587e-12 (1.00 )   |
| Formation of rad19        | 1.74189e-12 (0.839 )  | 1.74186e-12 (0.839 )  |
| H-abstraction to cyc2enyl | 2.68753e-13 (0.129 )  | 2.68753e-13 (0.129 )  |
| H-abstraction to cyc1enyl | 6.52627e-14 (0.0314 ) | 6.52614e-14 (0.0314 ) |

| species                       | PYtrue      | Cumul    | PYeffective | Cumul    |
|-------------------------------|-------------|----------|-------------|----------|
| Indene+H                      | 0.799582    | 0.799582 | 0.799596    | 0.799596 |
| Benzene+cycloprop-2-enylidene | 0.129463    | 0.929045 | 0.129465    | 0.929061 |
| PhCHCCH2+H                    | 0.0345727   | 0.963618 | 0.0345733   | 0.963635 |
| Benzene+cycloprop-1-enylidene | 0.0314382   | 0.995056 | 0.0314381   | 0.995073 |
| C2H2+PhCH2                    | 0.00107013  | 0.996126 | 0.00107014  | 0.996143 |
| Ph+MeAc                       | 0.00105356  | 0.997180 | 0.00105357  | 0.997197 |
| Ph+Allene                     | 0.000856132 | 0.998036 | 0.000856147 | 0.998053 |
| PhCCCH3+H                     | 0.000518388 | 0.998554 | 0.000518397 | 0.998571 |
| PhCH2CCH+H                    | 0.000387330 | 0.998942 | 0.000387336 | 0.998958 |
| PhCCH+CH3                     | 0.000373412 | 0.999315 | 0.000373419 | 0.999332 |
| rad67                         | 0.000352154 | 0.999667 | 0.000352160 | 0.999684 |
| rad35                         | 0.000127506 | 0.999795 | 0.000127508 | 0.999812 |
| PhcycC3H3_A+H                 | 6.68788e-05 | 0.999862 | 6.68799e-05 | 0.999878 |
| PhcycC3H3_B+H                 | 3.94287e-05 | 0.999901 | 3.94294e-05 | 0.999918 |
| PAH7+H                        | 3.02070e-05 | 0.999931 | 3.02076e-05 | 0.999948 |
| rad37                         | 2.12565e-05 | 0.999953 | 2.12568e-05 | 0.999969 |
| Phenyl+cycC3H4                | 1.68078e-05 | 0.999969 | 0.00000     | 0.999969 |
| PAH10+CH3                     | 1.12446e-05 | 0.999981 | 1.12448e-05 | 0.999981 |
| rad39                         | 5.81024e-06 | 0.999986 | 5.81034e-06 | 0.999986 |
| rad30                         | 4.04406e-06 | 0.999990 | 4.04413e-06 | 0.999990 |
| PAH9+H                        | 3.29362e-06 | 0.999994 | 3.29368e-06 | 0.999994 |
| rad38                         | 3.08261e-06 | 0.999997 | 3.08267e-06 | 0.999997 |
| PAH3+H                        | 1.54071e-06 | 0.999998 | 1.54074e-06 | 0.999998 |
| rad46                         | 3.42241e-07 | 0.999999 | 3.42247e-07 | 0.999999 |
| rad54                         | 2.28520e-07 | 0.999999 | 2.28525e-07 | 0.999999 |
| rad60syn                      | 2.23169e-07 | 0.999999 | 2.23174e-07 | 0.999999 |
| rad59                         | 1.76071e-07 | 0.999999 | 1.76074e-07 | 0.999999 |
| rad60anti                     | 1.33518e-07 | 1.000000 | 1.33520e-07 | 0.999999 |
| rad50                         | 1.25828e-07 | 1.000000 | 1.25830e-07 | 1.000000 |
| PAH1+H                        | 1.15144e-07 | 1.000000 | 1.15146e-07 | 1.000000 |
| rad43                         | 6.59877e-08 | 1.000000 | 6.59888e-08 | 1.000000 |
| rad70                         | 4.32138e-08 | 1.000000 | 4.32145e-08 | 1.000000 |
| rad51                         | 1.82054e-08 | 1.000000 | 1.82058e-08 | 1.000000 |
| rad55                         | 1.31137e-08 | 1.000000 | 1.31139e-08 | 1.000000 |
| rad52                         | 7.79301e-09 | 1.000000 | 7.79314e-09 | 1.000000 |
| rad34                         | 7.69227e-09 | 1.000000 | 7.69241e-09 | 1.000000 |
| rad58                         | 7.06667e-09 | 1.000000 | 7.06680e-09 | 1.000000 |
| rad62                         | 7.03941e-09 | 1.000000 | 7.03953e-09 | 1.000000 |
| rad9                          | 5.07046e-09 | 1.000000 | 5.07054e-09 | 1.000000 |
| rad61                         | 4.12279e-09 | 1.000000 | 4.12287e-09 | 1.000000 |
| rad41                         | 2.02449e-09 | 1.000000 | 2.02452e-09 | 1.000000 |
| rad53                         | 1.31433e-09 | 1.000000 | 1.31435e-09 | 1.000000 |



|           |             |          |             |          |
|-----------|-------------|----------|-------------|----------|
| rad56     | 7.88439e-10 | 1.000000 | 7.88453e-10 | 1.000000 |
| rad65     | 5.65117e-10 | 1.000000 | 5.65127e-10 | 1.000000 |
| rad64     | 4.71858e-10 | 1.000000 | 4.71866e-10 | 1.000000 |
| PAH8+H    | 3.09773e-10 | 1.000000 | 3.09778e-10 | 1.000000 |
| rad42     | 2.59223e-10 | 1.000000 | 2.59227e-10 | 1.000000 |
| rad68syn  | 1.64241e-10 | 1.000000 | 1.64244e-10 | 1.000000 |
| rad68anti | 1.08796e-10 | 1.000000 | 1.08797e-10 | 1.000000 |
| rad40syn  | 7.30651e-11 | 1.000000 | 7.30663e-11 | 1.000000 |
| rad73     | 6.66154e-11 | 1.000000 | 6.66165e-11 | 1.000000 |
| rad40anti | 5.52212e-11 | 1.000000 | 5.52221e-11 | 1.000000 |
| rad71     | 5.19094e-11 | 1.000000 | 5.19104e-11 | 1.000000 |
| rad12     | 7.27765e-12 | 1.000000 | 7.27778e-12 | 1.000000 |
| rad15     | 1.22152e-12 | 1.000000 | 1.22154e-12 | 1.000000 |
| rad23     | 8.07316e-13 | 1.000000 | 8.07330e-13 | 1.000000 |
| rad72     | 4.47990e-13 | 1.000000 | 4.47998e-13 | 1.000000 |
| rad19anti | 3.42048e-13 | 1.000000 | 3.42054e-13 | 1.000000 |
| rad6      | 2.18533e-13 | 1.000000 | 2.18538e-13 | 1.000000 |
| rad45     | 2.16023e-13 | 1.000000 | 2.16026e-13 | 1.000000 |
| rad2      | 2.11958e-13 | 1.000000 | 2.11962e-13 | 1.000000 |
| rad1      | 6.21810e-14 | 1.000000 | 6.21821e-14 | 1.000000 |
| rad36     | 2.28421e-14 | 1.000000 | 2.28425e-14 | 1.000000 |
| rad19syn  | 1.42443e-14 | 1.000000 | 1.42446e-14 | 1.000000 |
| rad10     | 6.56683e-15 | 1.000000 | 6.56695e-15 | 1.000000 |
| rad21     | 2.11581e-15 | 1.000000 | 2.11585e-15 | 1.000000 |
| rad3      | 2.11184e-15 | 1.000000 | 2.11188e-15 | 1.000000 |
| rad4      | 1.73985e-15 | 1.000000 | 1.73988e-15 | 1.000000 |
| rad8      | 6.27708e-16 | 1.000000 | 6.27719e-16 | 1.000000 |
| rad20     | 4.93324e-16 | 1.000000 | 4.93333e-16 | 1.000000 |
| rad26     | 4.64209e-16 | 1.000000 | 4.64218e-16 | 1.000000 |
| rad24     | 3.61522e-16 | 1.000000 | 3.61529e-16 | 1.000000 |
| rad33     | 2.31471e-16 | 1.000000 | 2.31476e-16 | 1.000000 |
| rad13     | 2.23222e-16 | 1.000000 | 2.23227e-16 | 1.000000 |
| rad22     | 9.26122e-17 | 1.000000 | 9.26144e-17 | 1.000000 |
| rad7      | 7.30696e-17 | 1.000000 | 7.30710e-17 | 1.000000 |
| rad28     | 6.31678e-17 | 1.000000 | 6.31689e-17 | 1.000000 |
| rad11     | 4.24013e-17 | 1.000000 | 4.24021e-17 | 1.000000 |
| rad31     | 2.18570e-17 | 1.000000 | 2.18575e-17 | 1.000000 |
| rad25     | 7.69233e-18 | 1.000000 | 7.69247e-18 | 1.000000 |
| rad27     | 5.65505e-18 | 1.000000 | 5.65514e-18 | 1.000000 |
| rad14     | 4.08250e-19 | 1.000000 | 4.08257e-19 | 1.000000 |
| rad47     | 1.62914e-19 | 1.000000 | 1.62917e-19 | 1.000000 |
| rad18     | 4.71798e-20 | 1.000000 | 4.71806e-20 | 1.000000 |
| rad5      | 9.78825e-26 | 1.000000 | 9.78840e-26 | 1.000000 |

0.100000000E-02 Pa, 1100.00000 K

| Rate constant             | True (fraction)       | Effective (fraction)  |
|---------------------------|-----------------------|-----------------------|
| Total                     | 2.81236e-12 (1.00 )   | 2.81222e-12 (1.00 )   |
| Formation of rad19        | 2.25993e-12 (0.804 )  | 2.25980e-12 (0.804 )  |
| H-abstraction to cyc2enyl | 4.30538e-13 (0.153 )  | 4.30538e-13 (0.153 )  |
| H-abstraction to cyclenyl | 1.21896e-13 (0.0433 ) | 1.21889e-13 (0.0433 ) |

| species                       | PYtrue      | Cumul    | PYeffective | Cumul    |
|-------------------------------|-------------|----------|-------------|----------|
| Indene+H                      | 0.745455    | 0.745455 | 0.745493    | 0.745493 |
| Benzene+cycloprop-2-enylidene | 0.153088    | 0.898543 | 0.153095    | 0.898588 |
| PhCHCCH2+H                    | 0.0504085   | 0.948951 | 0.0504110   | 0.948999 |
| Benzene+cycloprop-1-enylidene | 0.0433429   | 0.992294 | 0.0433425   | 0.992342 |
| Ph+MeAc                       | 0.00159989  | 0.993894 | 0.00159997  | 0.993942 |
| C2H2+PhCH2                    | 0.00157394  | 0.995468 | 0.00157401  | 0.995516 |
| Ph+Allene                     | 0.00139377  | 0.996862 | 0.00139384  | 0.996909 |
| PhCCCH3+H                     | 0.000746146 | 0.997608 | 0.000746184 | 0.997656 |
| PhCH2CCH+H                    | 0.000685300 | 0.998293 | 0.000685334 | 0.998341 |
| rad67                         | 0.000551509 | 0.998845 | 0.000551537 | 0.998892 |
| PhCCH+CH3                     | 0.000499927 | 0.999345 | 0.000499952 | 0.999392 |
| rad35                         | 0.000198904 | 0.999544 | 0.000198914 | 0.999591 |
| PhcycC3H3_A+H                 | 0.000160985 | 0.999705 | 0.000160994 | 0.999752 |
| PhcycC3H3_B+H                 | 0.000108569 | 0.999813 | 0.000108575 | 0.999861 |
| Phenyl+cycC3H4                | 4.74535e-05 | 0.999861 | 0.00000     | 0.999861 |
| PAH7+H                        | 4.44306e-05 | 0.999905 | 4.44328e-05 | 0.999905 |
| rad37                         | 3.57976e-05 | 0.999941 | 3.57994e-05 | 0.999941 |
| PAH10+CH3                     | 2.47740e-05 | 0.999966 | 2.47753e-05 | 0.999966 |
| rad39                         | 8.15502e-06 | 0.999974 | 8.15543e-06 | 0.999974 |
| rad30                         | 6.70503e-06 | 0.999981 | 6.70537e-06 | 0.999981 |
| PAH9+H                        | 6.62671e-06 | 0.999987 | 6.62704e-06 | 0.999987 |
| rad38                         | 6.20642e-06 | 0.999993 | 6.20673e-06 | 0.999994 |
| PAH3+H                        | 3.44989e-06 | 0.999997 | 3.45007e-06 | 0.999997 |
| rad46                         | 7.53035e-07 | 0.999998 | 7.53072e-07 | 0.999998 |
| rad54                         | 4.48843e-07 | 0.999998 | 4.48865e-07 | 0.999998 |

|           |             |          |             |          |
|-----------|-------------|----------|-------------|----------|
| rad60syn  | 4.32688e-07 | 0.999998 | 4.32709e-07 | 0.999999 |
| rad59     | 3.79560e-07 | 0.999999 | 3.79579e-07 | 0.999999 |
| rad50     | 3.42343e-07 | 0.999999 | 3.42360e-07 | 0.999999 |
| PAH1+H    | 2.85110e-07 | 1.000000 | 2.85124e-07 | 1.000000 |
| rad60anti | 2.61576e-07 | 1.000000 | 2.61589e-07 | 1.000000 |
| rad43     | 1.34198e-07 | 1.000000 | 1.34204e-07 | 1.000000 |
| rad70     | 9.71315e-08 | 1.000000 | 9.71362e-08 | 1.000000 |
| rad51     | 5.83473e-08 | 1.000000 | 5.83503e-08 | 1.000000 |
| rad55     | 2.73128e-08 | 1.000000 | 2.73142e-08 | 1.000000 |
| rad52     | 2.29836e-08 | 1.000000 | 2.29848e-08 | 1.000000 |
| rad58     | 1.92026e-08 | 1.000000 | 1.92035e-08 | 1.000000 |
| rad34     | 1.87452e-08 | 1.000000 | 1.87461e-08 | 1.000000 |
| rad61     | 1.28391e-08 | 1.000000 | 1.28398e-08 | 1.000000 |
| rad62     | 1.28154e-08 | 1.000000 | 1.28161e-08 | 1.000000 |
| rad41     | 5.04816e-09 | 1.000000 | 5.04841e-09 | 1.000000 |
| rad9      | 4.34981e-09 | 1.000000 | 4.35003e-09 | 1.000000 |
| rad53     | 3.43666e-09 | 1.000000 | 3.43683e-09 | 1.000000 |
| rad56     | 2.33967e-09 | 1.000000 | 2.33979e-09 | 1.000000 |
| rad65     | 1.78387e-09 | 1.000000 | 1.78396e-09 | 1.000000 |
| PAH8+H    | 1.24983e-09 | 1.000000 | 1.24989e-09 | 1.000000 |
| rad64     | 1.19311e-09 | 1.000000 | 1.19317e-09 | 1.000000 |
| rad42     | 5.61779e-10 | 1.000000 | 5.61807e-10 | 1.000000 |
| rad68syn  | 5.31782e-10 | 1.000000 | 5.31809e-10 | 1.000000 |
| rad68anti | 3.50892e-10 | 1.000000 | 3.50910e-10 | 1.000000 |
| rad73     | 3.32931e-10 | 1.000000 | 3.32947e-10 | 1.000000 |
| rad71     | 2.96174e-10 | 1.000000 | 2.96189e-10 | 1.000000 |
| rad40syn  | 2.67663e-10 | 1.000000 | 2.67676e-10 | 1.000000 |
| rad40anti | 2.04459e-10 | 1.000000 | 2.04470e-10 | 1.000000 |
| rad12     | 7.93745e-12 | 1.000000 | 7.93785e-12 | 1.000000 |
| rad72     | 3.56788e-12 | 1.000000 | 3.56806e-12 | 1.000000 |
| rad15     | 1.20872e-12 | 1.000000 | 1.20878e-12 | 1.000000 |
| rad23     | 7.62638e-13 | 1.000000 | 7.62676e-13 | 1.000000 |
| rad19anti | 2.56276e-13 | 1.000000 | 2.56289e-13 | 1.000000 |
| rad45     | 2.22285e-13 | 1.000000 | 2.22296e-13 | 1.000000 |
| rad2      | 1.65554e-13 | 1.000000 | 1.65562e-13 | 1.000000 |
| rad6      | 1.48364e-13 | 1.000000 | 1.48371e-13 | 1.000000 |
| rad1      | 4.81612e-14 | 1.000000 | 4.81637e-14 | 1.000000 |
| rad36     | 2.30552e-14 | 1.000000 | 2.30564e-14 | 1.000000 |
| rad19syn  | 1.28391e-14 | 1.000000 | 1.28398e-14 | 1.000000 |
| rad21     | 9.63745e-15 | 1.000000 | 9.63792e-15 | 1.000000 |
| rad8      | 7.65079e-15 | 1.000000 | 7.65117e-15 | 1.000000 |
| rad10     | 5.97132e-15 | 1.000000 | 5.97162e-15 | 1.000000 |
| rad13     | 3.15807e-15 | 1.000000 | 3.15823e-15 | 1.000000 |
| rad20     | 2.48674e-15 | 1.000000 | 2.48686e-15 | 1.000000 |
| rad3      | 1.52865e-15 | 1.000000 | 1.52873e-15 | 1.000000 |
| rad4      | 1.25387e-15 | 1.000000 | 1.25393e-15 | 1.000000 |
| rad33     | 8.69068e-16 | 1.000000 | 8.69109e-16 | 1.000000 |
| rad24     | 7.72326e-16 | 1.000000 | 7.72364e-16 | 1.000000 |
| rad11     | 6.01485e-16 | 1.000000 | 6.01515e-16 | 1.000000 |
| rad26     | 3.45349e-16 | 1.000000 | 3.45367e-16 | 1.000000 |
| rad22     | 9.74248e-17 | 1.000000 | 9.74303e-17 | 1.000000 |
| rad7      | 9.48903e-17 | 1.000000 | 9.48951e-17 | 1.000000 |
| rad25     | 7.88064e-17 | 1.000000 | 7.88103e-17 | 1.000000 |
| rad27     | 4.73457e-17 | 1.000000 | 4.73480e-17 | 1.000000 |
| rad28     | 4.65177e-17 | 1.000000 | 4.65200e-17 | 1.000000 |
| rad31     | 2.41068e-17 | 1.000000 | 2.41080e-17 | 1.000000 |
| rad18     | 4.97646e-18 | 1.000000 | 4.97671e-18 | 1.000000 |
| rad14     | 3.73867e-18 | 1.000000 | 3.73886e-18 | 1.000000 |
| rad47     | 5.24238e-19 | 1.000000 | 5.24264e-19 | 1.000000 |
| rad5      | 2.23451e-24 | 1.000000 | 2.23463e-24 | 1.000000 |

0.100000000E-02 Pa, 1200.00000 K

| Rate constant             | True (fraction)      | Effective (fraction) |
|---------------------------|----------------------|----------------------|
| Total                     | 3.72623e-12 (1.00)   | 3.72576e-12 (1.00)   |
| Formation of rad19        | 2.86288e-12 (0.768)  | 2.86245e-12 (0.768)  |
| H-abstraction to cyc2enyl | 6.53266e-13 (0.175)  | 6.53266e-13 (0.175)  |
| H-abstraction to cyc1enyl | 2.10085e-13 (0.0564) | 2.10053e-13 (0.0564) |

| species                       | PYtrue     | Cumul    | PYeffective | Cumul    |
|-------------------------------|------------|----------|-------------|----------|
| Indene+H                      | 0.687506   | 0.687506 | 0.687593    | 0.687593 |
| Benzene+cycloprop-2-enylidene | 0.175315   | 0.862821 | 0.175337    | 0.862930 |
| PhCHCCH2+H                    | 0.0694470  | 0.932268 | 0.0694557   | 0.932386 |
| Benzene+cycloprop-1-enylidene | 0.0563801  | 0.988648 | 0.0563786   | 0.988764 |
| Ph+MeAc                       | 0.00227272 | 0.990921 | 0.00227301  | 0.991037 |
| C2H2+PhCH2                    | 0.00219121 | 0.993112 | 0.00219148  | 0.993229 |
| Ph+Allene                     | 0.00207994 | 0.995192 | 0.00208020  | 0.995309 |
| PhCH2CCH+H                    | 0.00110692 | 0.996299 | 0.00110706  | 0.996416 |

|                |             |          |             |          |
|----------------|-------------|----------|-------------|----------|
| PhCCCH3+H      | 0.00101200  | 0.997311 | 0.00101213  | 0.997428 |
| rad67          | 0.000806305 | 0.998117 | 0.000806406 | 0.998235 |
| PhCCH+CH3      | 0.000645716 | 0.998763 | 0.000645798 | 0.998880 |
| PhcycC3H3_A+H  | 0.000345598 | 0.999109 | 0.000345641 | 0.999226 |
| rad35          | 0.000290169 | 0.999399 | 0.000290206 | 0.999516 |
| PhcycC3H3_B+H  | 0.000261273 | 0.999660 | 0.000261306 | 0.999778 |
| Phenyl+cycC3H4 | 0.000117514 | 0.999778 | 0.000000    | 0.999778 |
| PAH7+H         | 6.09151e-05 | 0.999838 | 6.09229e-05 | 0.999839 |
| rad37          | 5.50993e-05 | 0.999894 | 5.51063e-05 | 0.999894 |
| PAH10+CH3      | 4.81021e-05 | 0.999942 | 4.81082e-05 | 0.999942 |
| PAH9+H         | 1.22285e-05 | 0.999954 | 1.22300e-05 | 0.999954 |
| rad38          | 1.12958e-05 | 0.999965 | 1.12972e-05 | 0.999965 |
| rad39          | 1.06983e-05 | 0.999976 | 1.06996e-05 | 0.999976 |
| rad30          | 1.03391e-05 | 0.999986 | 1.03403e-05 | 0.999986 |
| PAH3+H         | 6.91380e-06 | 0.999993 | 6.91467e-06 | 0.999993 |
| rad46          | 1.50176e-06 | 0.999995 | 1.50195e-06 | 0.999995 |
| rad50          | 8.20642e-07 | 0.999995 | 8.20743e-07 | 0.999996 |
| rad54          | 7.81497e-07 | 0.999996 | 7.81598e-07 | 0.999996 |
| rad60syn       | 7.65102e-07 | 0.999997 | 7.65199e-07 | 0.999997 |
| rad59          | 7.35019e-07 | 0.999998 | 7.35111e-07 | 0.999998 |
| PAH1+H         | 6.15260e-07 | 0.999998 | 6.15338e-07 | 0.999998 |
| rad60anti      | 4.66711e-07 | 0.999999 | 4.66769e-07 | 0.999999 |
| rad43          | 2.45550e-07 | 0.999999 | 2.45581e-07 | 0.999999 |
| rad70          | 1.92605e-07 | 0.999999 | 1.92629e-07 | 0.999999 |
| rad51          | 1.60721e-07 | 0.999999 | 1.60741e-07 | 1.000000 |
| rad52          | 5.89509e-08 | 1.000000 | 5.89584e-08 | 1.000000 |
| rad55          | 4.99975e-08 | 1.000000 | 5.00038e-08 | 1.000000 |
| rad58          | 4.53332e-08 | 1.000000 | 4.53390e-08 | 1.000000 |
| rad34          | 3.98656e-08 | 1.000000 | 3.98706e-08 | 1.000000 |
| rad61          | 3.33579e-08 | 1.000000 | 3.33622e-08 | 1.000000 |
| rad62          | 2.11968e-08 | 1.000000 | 2.11994e-08 | 1.000000 |
| rad41          | 1.09917e-08 | 1.000000 | 1.09931e-08 | 1.000000 |
| rad53          | 7.65060e-09 | 1.000000 | 7.65157e-09 | 1.000000 |
| rad56          | 5.79402e-09 | 1.000000 | 5.79475e-09 | 1.000000 |
| rad65          | 4.84116e-09 | 1.000000 | 4.84176e-09 | 1.000000 |
| PAH8+H         | 4.08165e-09 | 1.000000 | 4.08217e-09 | 1.000000 |
| rad9           | 3.08822e-09 | 1.000000 | 3.08861e-09 | 1.000000 |
| rad64          | 2.59994e-09 | 1.000000 | 2.60027e-09 | 1.000000 |
| rad68syn       | 1.43966e-09 | 1.000000 | 1.43984e-09 | 1.000000 |
| rad73          | 1.32832e-09 | 1.000000 | 1.32849e-09 | 1.000000 |
| rad71          | 1.32077e-09 | 1.000000 | 1.32093e-09 | 1.000000 |
| rad42          | 1.07985e-09 | 1.000000 | 1.07999e-09 | 1.000000 |
| rad68anti      | 9.46805e-10 | 1.000000 | 9.46926e-10 | 1.000000 |
| rad40syn       | 8.05967e-10 | 1.000000 | 8.06068e-10 | 1.000000 |
| rad40anti      | 6.21771e-10 | 1.000000 | 6.21850e-10 | 1.000000 |
| rad72          | 2.08622e-11 | 1.000000 | 2.08648e-11 | 1.000000 |
| rad12          | 7.13603e-12 | 1.000000 | 7.13693e-12 | 1.000000 |
| rad15          | 1.04113e-12 | 1.000000 | 1.04126e-12 | 1.000000 |
| rad23          | 7.05466e-13 | 1.000000 | 7.05554e-13 | 1.000000 |
| rad45          | 2.16968e-13 | 1.000000 | 2.16996e-13 | 1.000000 |
| rad19anti      | 1.93811e-13 | 1.000000 | 1.93836e-13 | 1.000000 |
| rad2           | 1.25586e-13 | 1.000000 | 1.25602e-13 | 1.000000 |
| rad6           | 1.22969e-13 | 1.000000 | 1.22985e-13 | 1.000000 |
| rad1           | 3.64295e-14 | 1.000000 | 3.64341e-14 | 1.000000 |
| rad8           | 2.53541e-14 | 1.000000 | 2.53574e-14 | 1.000000 |
| rad36          | 2.24112e-14 | 1.000000 | 2.24141e-14 | 1.000000 |
| rad21          | 2.06286e-14 | 1.000000 | 2.06313e-14 | 1.000000 |
| rad13          | 1.26226e-14 | 1.000000 | 1.26242e-14 | 1.000000 |
| rad19syn       | 1.13955e-14 | 1.000000 | 1.13970e-14 | 1.000000 |
| rad11          | 9.93610e-15 | 1.000000 | 9.93737e-15 | 1.000000 |
| rad10          | 5.52369e-15 | 1.000000 | 5.52439e-15 | 1.000000 |
| rad20          | 5.30484e-15 | 1.000000 | 5.30550e-15 | 1.000000 |
| rad33          | 1.49700e-15 | 1.000000 | 1.49719e-15 | 1.000000 |
| rad24          | 1.18501e-15 | 1.000000 | 1.18516e-15 | 1.000000 |
| rad3           | 1.08528e-15 | 1.000000 | 1.08542e-15 | 1.000000 |
| rad4           | 8.86216e-16 | 1.000000 | 8.86323e-16 | 1.000000 |
| rad7           | 7.81158e-16 | 1.000000 | 7.81260e-16 | 1.000000 |
| rad25          | 2.92602e-16 | 1.000000 | 2.92639e-16 | 1.000000 |
| rad26          | 2.67666e-16 | 1.000000 | 2.67700e-16 | 1.000000 |
| rad18          | 1.64377e-16 | 1.000000 | 1.64397e-16 | 1.000000 |
| rad27          | 1.52396e-16 | 1.000000 | 1.52415e-16 | 1.000000 |
| rad22          | 9.94540e-17 | 1.000000 | 9.94667e-17 | 1.000000 |
| rad28          | 3.73660e-17 | 1.000000 | 3.73707e-17 | 1.000000 |
| rad31          | 2.55729e-17 | 1.000000 | 2.55762e-17 | 1.000000 |
| rad14          | 1.32770e-17 | 1.000000 | 1.32787e-17 | 1.000000 |
| rad47          | 1.43379e-18 | 1.000000 | 1.43398e-18 | 1.000000 |
| rad5           | 8.28632e-23 | 1.000000 | 8.28740e-23 | 1.000000 |

0.100000000E-02 Pa, 1300.00000 K

=====

| Rate constant             | True (fraction)       | Effective (fraction)  |
|---------------------------|-----------------------|-----------------------|
| Total                     | 4.84401e-12 (1.00 )   | 4.84262e-12 (1.00 )   |
| Formation of rad19        | 3.55537e-12 (0.734 )  | 3.55411e-12 (0.734 )  |
| H-abstraction to cyc2enyl | 9.48893e-13 (0.196 )  | 9.48893e-13 (0.196 )  |
| H-abstraction to cyc1enyl | 3.39740e-13 (0.0701 ) | 3.39620e-13 (0.0701 ) |

| species                       | PYtrue      | Cumul    | PYeffective | Cumul    |
|-------------------------------|-------------|----------|-------------|----------|
| Indene+H                      | 0.627161    | 0.627161 | 0.627340    | 0.627340 |
| Benzene+cycloprop-2-enylidene | 0.195890    | 0.823052 | 0.195946    | 0.823286 |
| PhCHCCH2+H                    | 0.0908777   | 0.913929 | 0.0909037   | 0.914190 |
| Benzene+cycloprop-1-enylidene | 0.0701362   | 0.984065 | 0.0701313   | 0.984321 |
| Ph+MeAc                       | 0.00304441  | 0.987110 | 0.00304527  | 0.987366 |
| C2H2+PhCH2                    | 0.00290372  | 0.990014 | 0.00290454  | 0.990271 |
| Ph+Allene                     | 0.00288470  | 0.992898 | 0.00288553  | 0.993157 |
| PhCH2CCH+H                    | 0.00165448  | 0.994553 | 0.00165495  | 0.994812 |
| PhCCCH3+H                     | 0.00130153  | 0.995854 | 0.00130190  | 0.996113 |
| rad67                         | 0.00110883  | 0.996963 | 0.00110915  | 0.997223 |
| PhCCH+CH3                     | 0.000809514 | 0.997773 | 0.000809751 | 0.998032 |
| PhcycC3H3_A+H                 | 0.000673391 | 0.998446 | 0.000673584 | 0.998706 |
| PhcycC3H3_B+H                 | 0.000561394 | 0.999007 | 0.000561554 | 0.999267 |
| rad35                         | 0.000398725 | 0.999406 | 0.000398838 | 0.999666 |
| Phenyl+cycC3H4                | 0.000260506 | 0.999667 | 0.000000    | 0.999666 |
| PAH10+CH3                     | 8.38007e-05 | 0.999750 | 8.38250e-05 | 0.999750 |
| PAH7+H                        | 7.89117e-05 | 0.999829 | 7.89341e-05 | 0.999829 |
| rad37                         | 7.83568e-05 | 0.999908 | 7.83785e-05 | 0.999907 |
| PAH9+H                        | 2.08511e-05 | 0.999929 | 2.08571e-05 | 0.999928 |
| rad38                         | 1.88167e-05 | 0.999947 | 1.88221e-05 | 0.999947 |
| rad30                         | 1.49360e-05 | 0.999962 | 1.49402e-05 | 0.999962 |
| rad39                         | 1.33374e-05 | 0.999976 | 1.33412e-05 | 0.999975 |
| PAH3+H                        | 1.25732e-05 | 0.999988 | 1.25768e-05 | 0.999988 |
| rad46                         | 2.73965e-06 | 0.999991 | 2.74043e-06 | 0.999991 |
| rad50                         | 1.75696e-06 | 0.999993 | 1.75746e-06 | 0.999992 |
| rad59                         | 1.29584e-06 | 0.999994 | 1.29620e-06 | 0.999994 |
| rad60syn                      | 1.24692e-06 | 0.999995 | 1.24728e-06 | 0.999995 |
| rad54                         | 1.23055e-06 | 0.999996 | 1.23091e-06 | 0.999996 |
| PAH1+H                        | 1.18164e-06 | 0.999998 | 1.18197e-06 | 0.999997 |
| rad60anti                     | 7.66599e-07 | 0.999998 | 7.66824e-07 | 0.999998 |
| rad43                         | 4.10006e-07 | 0.999999 | 4.10123e-07 | 0.999999 |
| rad51                         | 3.87407e-07 | 0.999999 | 3.87517e-07 | 0.999999 |
| rad70                         | 3.43677e-07 | 1.000000 | 3.43776e-07 | 0.999999 |
| rad52                         | 1.33628e-07 | 1.000000 | 1.33666e-07 | 0.999999 |
| rad58                         | 9.48433e-08 | 1.000000 | 9.48705e-08 | 1.000000 |
| rad55                         | 8.22139e-08 | 1.000000 | 8.22375e-08 | 1.000000 |
| rad34                         | 7.56235e-08 | 1.000000 | 7.56454e-08 | 1.000000 |
| rad61                         | 7.45086e-08 | 1.000000 | 7.45298e-08 | 1.000000 |
| rad62                         | 3.23565e-08 | 1.000000 | 3.23657e-08 | 1.000000 |
| rad41                         | 2.13212e-08 | 1.000000 | 2.13273e-08 | 1.000000 |
| rad53                         | 1.49188e-08 | 1.000000 | 1.49231e-08 | 1.000000 |
| rad56                         | 1.23746e-08 | 1.000000 | 1.23782e-08 | 1.000000 |
| rad65                         | 1.15036e-08 | 1.000000 | 1.15069e-08 | 1.000000 |
| PAH8+H                        | 1.11832e-08 | 1.000000 | 1.11864e-08 | 1.000000 |
| rad64                         | 5.02551e-09 | 1.000000 | 5.02694e-09 | 1.000000 |
| rad71                         | 4.76254e-09 | 1.000000 | 4.76391e-09 | 1.000000 |
| rad73                         | 4.36515e-09 | 1.000000 | 4.36639e-09 | 1.000000 |
| rad68syn                      | 3.35946e-09 | 1.000000 | 3.36041e-09 | 1.000000 |
| rad68anti                     | 2.20311e-09 | 1.000000 | 2.20374e-09 | 1.000000 |
| rad40syn                      | 2.06131e-09 | 1.000000 | 2.06190e-09 | 1.000000 |
| rad9                          | 2.02930e-09 | 1.000000 | 2.02988e-09 | 1.000000 |
| rad42                         | 1.87919e-09 | 1.000000 | 1.87972e-09 | 1.000000 |
| rad40anti                     | 1.60444e-09 | 1.000000 | 1.60490e-09 | 1.000000 |
| rad72                         | 9.34620e-11 | 1.000000 | 9.34885e-11 | 1.000000 |
| rad12                         | 5.89854e-12 | 1.000000 | 5.90022e-12 | 1.000000 |
| rad15                         | 1.42938e-12 | 1.000000 | 1.42979e-12 | 1.000000 |
| rad23                         | 6.48684e-13 | 1.000000 | 6.48869e-13 | 1.000000 |
| rad45                         | 2.05114e-13 | 1.000000 | 2.05173e-13 | 1.000000 |
| rad19anti                     | 1.48394e-13 | 1.000000 | 1.48436e-13 | 1.000000 |
| rad6                          | 1.35944e-13 | 1.000000 | 1.35983e-13 | 1.000000 |
| rad2                          | 9.36213e-14 | 1.000000 | 9.36485e-14 | 1.000000 |
| rad11                         | 5.76701e-14 | 1.000000 | 5.76866e-14 | 1.000000 |
| rad8                          | 4.42248e-14 | 1.000000 | 4.42375e-14 | 1.000000 |
| rad21                         | 3.03537e-14 | 1.000000 | 3.03624e-14 | 1.000000 |
| rad1                          | 2.72920e-14 | 1.000000 | 2.72998e-14 | 1.000000 |
| rad13                         | 2.24572e-14 | 1.000000 | 2.24637e-14 | 1.000000 |
| rad36                         | 2.12479e-14 | 1.000000 | 2.12540e-14 | 1.000000 |
| rad19syn                      | 1.00706e-14 | 1.000000 | 1.00735e-14 | 1.000000 |
| rad10                         | 9.29746e-15 | 1.000000 | 9.30012e-15 | 1.000000 |
| rad7                          | 8.41501e-15 | 1.000000 | 8.41736e-15 | 1.000000 |
| rad20                         | 7.38187e-15 | 1.000000 | 7.38400e-15 | 1.000000 |

|       |             |         |             |          |
|-------|-------------|---------|-------------|----------|
| rad33 | 1.76734e-15 | 1.00000 | 1.76784e-15 | 1.000000 |
| rad18 | 1.53631e-15 | 1.00000 | 1.53675e-15 | 1.000000 |
| rad24 | 1.53474e-15 | 1.00000 | 1.53518e-15 | 1.000000 |
| rad3  | 7.64404e-16 | 1.00000 | 7.64623e-16 | 1.000000 |
| rad4  | 6.21129e-16 | 1.00000 | 6.21307e-16 | 1.000000 |
| rad25 | 5.66800e-16 | 1.00000 | 5.66962e-16 | 1.000000 |
| rad27 | 2.70876e-16 | 1.00000 | 2.70953e-16 | 1.000000 |
| rad26 | 2.30283e-16 | 1.00000 | 2.30348e-16 | 1.000000 |
| rad22 | 9.88215e-17 | 1.00000 | 9.88498e-17 | 1.000000 |
| rad28 | 3.52744e-17 | 1.00000 | 3.52844e-17 | 1.000000 |
| rad31 | 2.62744e-17 | 1.00000 | 2.62819e-17 | 1.000000 |
| rad14 | 2.40863e-17 | 1.00000 | 2.40932e-17 | 1.000000 |
| rad47 | 3.40948e-18 | 1.00000 | 3.41046e-18 | 1.000000 |
| rad5  | 3.70950e-21 | 1.00000 | 3.71055e-21 | 1.000000 |

0.100000000E-02 Pa, 1400.00000 K

| Rate constant             | True (fraction)       | Effective (fraction)  |
|---------------------------|-----------------------|-----------------------|
| Total                     | 6.19360e-12 (1.00 )   | 6.18997e-12 (1.00 )   |
| Formation of rad19        | 4.34185e-12 (0.701 )  | 4.33861e-12 (0.701 )  |
| H-abstraction to cyc2enyl | 1.32990e-12 (0.215 )  | 1.32990e-12 (0.215 )  |
| H-abstraction to cyc1enyl | 5.21850e-13 (0.0843 ) | 5.21461e-13 (0.0842 ) |

| species                       | PYtrue      | Cumul    | PYeffective | Cumul    |
|-------------------------------|-------------|----------|-------------|----------|
| Indene+H                      | 0.566028    | 0.566028 | 0.566360    | 0.566360 |
| Benzene+cycloprop-2-enylidene | 0.214721    | 0.780749 | 0.214847    | 0.781207 |
| PhCHCCH2+H                    | 0.113526    | 0.894275 | 0.113593    | 0.894800 |
| Benzene+cycloprop-1-enylidene | 0.0842564   | 0.978532 | 0.0842429   | 0.979043 |
| Ph+MeAc                       | 0.00387284  | 0.982405 | 0.00387511  | 0.982918 |
| Ph+Allene                     | 0.00376036  | 0.986165 | 0.00376256  | 0.986680 |
| C2H2+PhCH2                    | 0.00367929  | 0.989844 | 0.00368145  | 0.990362 |
| PhCH2CCH+H                    | 0.00231297  | 0.992157 | 0.00231433  | 0.992676 |
| PhCCH3+H                      | 0.00159640  | 0.993754 | 0.00159734  | 0.994274 |
| rad67                         | 0.00144409  | 0.995198 | 0.00144494  | 0.995719 |
| PhcycC3H3_A+H                 | 0.00120489  | 0.996403 | 0.00120559  | 0.996924 |
| PhcycC3H3_B+H                 | 0.00109183  | 0.997495 | 0.00109247  | 0.998017 |
| PhCCH+CH3                     | 0.000988680 | 0.998483 | 0.000989264 | 0.999006 |
| Phenyl+cycC3H4                | 0.000523345 | 0.999007 | 0.000000    | 0.999006 |
| rad35                         | 0.000519418 | 0.999526 | 0.000519722 | 0.999526 |
| PAH10+CH3                     | 0.000132940 | 0.999659 | 0.000133019 | 0.999659 |
| rad37                         | 0.000103969 | 0.999763 | 0.000104030 | 0.999763 |
| PAH7+H                        | 9.76629e-05 | 0.999861 | 9.77202e-05 | 0.999860 |
| PAH9+H                        | 3.30451e-05 | 0.999894 | 3.30646e-05 | 0.999893 |
| rad38                         | 2.89869e-05 | 0.999923 | 2.90039e-05 | 0.999922 |
| PAH3+H                        | 2.09773e-05 | 0.999944 | 2.09896e-05 | 0.999943 |
| rad30                         | 2.03484e-05 | 0.999964 | 2.03603e-05 | 0.999964 |
| rad39                         | 1.60326e-05 | 0.999980 | 1.60420e-05 | 0.999980 |
| rad46                         | 4.60489e-06 | 0.999985 | 4.60759e-06 | 0.999984 |
| rad50                         | 3.39256e-06 | 0.999988 | 3.39455e-06 | 0.999988 |
| rad59                         | 2.10237e-06 | 0.999990 | 2.10360e-06 | 0.999990 |
| PAH1+H                        | 2.05214e-06 | 0.999992 | 2.05334e-06 | 0.999992 |
| rad60syn                      | 1.88965e-06 | 0.999994 | 1.89076e-06 | 0.999994 |
| rad54                         | 1.78086e-06 | 0.999996 | 1.78190e-06 | 0.999996 |
| rad60anti                     | 1.16973e-06 | 0.999997 | 1.17042e-06 | 0.999997 |
| rad51                         | 8.27129e-07 | 0.999998 | 8.27613e-07 | 0.999998 |
| rad43                         | 6.31782e-07 | 0.999998 | 6.32153e-07 | 0.999998 |
| rad70                         | 5.60217e-07 | 0.999999 | 5.60546e-07 | 0.999999 |
| rad52                         | 2.70713e-07 | 0.999999 | 2.70872e-07 | 0.999999 |
| rad58                         | 1.78428e-07 | 0.999999 | 1.78532e-07 | 0.999999 |
| rad61                         | 1.46278e-07 | 1.000000 | 1.46363e-07 | 0.999999 |
| rad34                         | 1.30056e-07 | 1.000000 | 1.30132e-07 | 1.000000 |
| rad55                         | 1.23571e-07 | 1.000000 | 1.23644e-07 | 1.000000 |
| rad62                         | 4.61529e-08 | 1.000000 | 4.61799e-08 | 1.000000 |
| rad41                         | 3.74002e-08 | 1.000000 | 3.74221e-08 | 1.000000 |
| PAH8+H                        | 2.63149e-08 | 1.000000 | 2.63303e-08 | 1.000000 |
| rad53                         | 2.60384e-08 | 1.000000 | 2.60537e-08 | 1.000000 |
| rad65                         | 2.42340e-08 | 1.000000 | 2.42482e-08 | 1.000000 |
| rad56                         | 2.33522e-08 | 1.000000 | 2.33659e-08 | 1.000000 |
| rad71                         | 1.41523e-08 | 1.000000 | 1.41606e-08 | 1.000000 |
| rad73                         | 1.20323e-08 | 1.000000 | 1.20393e-08 | 1.000000 |
| rad64                         | 8.79755e-09 | 1.000000 | 8.80273e-09 | 1.000000 |
| rad68syn                      | 6.90097e-09 | 1.000000 | 6.90502e-09 | 1.000000 |
| rad40syn                      | 4.57744e-09 | 1.000000 | 4.58013e-09 | 1.000000 |
| rad68anti                     | 4.51464e-09 | 1.000000 | 4.51729e-09 | 1.000000 |
| rad40anti                     | 3.59045e-09 | 1.000000 | 3.59256e-09 | 1.000000 |
| rad42                         | 3.00666e-09 | 1.000000 | 3.00843e-09 | 1.000000 |
| rad9                          | 1.29172e-09 | 1.000000 | 1.29248e-09 | 1.000000 |
| rad72                         | 3.28506e-10 | 1.000000 | 3.28699e-10 | 1.000000 |

|           |             |         |             |          |
|-----------|-------------|---------|-------------|----------|
| rad12     | 4.68957e-12 | 1.00000 | 4.69232e-12 | 1.000000 |
| rad15     | 3.91901e-12 | 1.00000 | 3.92131e-12 | 1.000000 |
| rad23     | 5.95464e-13 | 1.00000 | 5.95813e-13 | 1.000000 |
| rad45     | 1.89643e-13 | 1.00000 | 1.89754e-13 | 1.000000 |
| rad6      | 1.71321e-13 | 1.00000 | 1.71422e-13 | 1.000000 |
| rad11     | 1.45883e-13 | 1.00000 | 1.45969e-13 | 1.000000 |
| rad19anti | 1.15118e-13 | 1.00000 | 1.15186e-13 | 1.000000 |
| rad2      | 6.92760e-14 | 1.00000 | 6.93166e-14 | 1.000000 |
| rad8      | 5.66687e-14 | 1.00000 | 5.67019e-14 | 1.000000 |
| rad21     | 3.67060e-14 | 1.00000 | 3.67276e-14 | 1.000000 |
| rad7      | 3.52764e-14 | 1.00000 | 3.52971e-14 | 1.000000 |
| rad10     | 2.67594e-14 | 1.00000 | 2.67752e-14 | 1.000000 |
| rad13     | 2.61033e-14 | 1.00000 | 2.61186e-14 | 1.000000 |
| rad1      | 2.03982e-14 | 1.00000 | 2.04101e-14 | 1.000000 |
| rad36     | 1.97582e-14 | 1.00000 | 1.97697e-14 | 1.000000 |
| rad19syn  | 8.90593e-15 | 1.00000 | 8.91116e-15 | 1.000000 |
| rad20     | 8.28840e-15 | 1.00000 | 8.29331e-15 | 1.000000 |
| rad18     | 5.38029e-15 | 1.00000 | 5.38344e-15 | 1.000000 |
| rad24     | 1.80313e-15 | 1.00000 | 1.80420e-15 | 1.000000 |
| rad33     | 1.72626e-15 | 1.00000 | 1.72727e-15 | 1.000000 |
| rad25     | 7.72646e-16 | 1.00000 | 7.73104e-16 | 1.000000 |
| rad3      | 5.37925e-16 | 1.00000 | 5.38240e-16 | 1.000000 |
| rad26     | 4.52292e-16 | 1.00000 | 4.52557e-16 | 1.000000 |
| rad4      | 4.34342e-16 | 1.00000 | 4.34596e-16 | 1.000000 |
| rad27     | 3.50747e-16 | 1.00000 | 3.50953e-16 | 1.000000 |
| rad22     | 9.59952e-17 | 1.00000 | 9.60513e-17 | 1.000000 |
| rad28     | 4.11062e-17 | 1.00000 | 4.11303e-17 | 1.000000 |
| rad14     | 3.02593e-17 | 1.00000 | 3.02771e-17 | 1.000000 |
| rad31     | 2.62635e-17 | 1.00000 | 2.62789e-17 | 1.000000 |
| rad47     | 7.15113e-18 | 1.00000 | 7.15531e-18 | 1.000000 |
| rad5      | 1.41222e-19 | 1.00000 | 1.41305e-19 | 1.000000 |

0.100000000E-02 Pa, 1500.00000 K

| Rate constant             | True (fraction)       | Effective (fraction)  |
|---------------------------|-----------------------|-----------------------|
| Total                     | 7.80417e-12 (1.00 )   | 7.79561e-12 (1.00 )   |
| Formation of rad19        | 5.22661e-12 (0.670 )  | 5.21915e-12 (0.669 )  |
| H-abstraction to cyc2enyl | 1.80920e-12 (0.232 )  | 1.80920e-12 (0.232 )  |
| H-abstraction to cyclenyl | 7.68359e-13 (0.0985 ) | 7.67262e-13 (0.0984 ) |

| species                       | PYtrue      | Cumul    | PYeffective | Cumul    |
|-------------------------------|-------------|----------|-------------|----------|
| Indene+H                      | 0.505870    | 0.505870 | 0.506425    | 0.506425 |
| Benzene+cycloprop-2-enylidene | 0.231825    | 0.737695 | 0.232079    | 0.738505 |
| PhCHCCH2+H                    | 0.135967    | 0.873662 | 0.136116    | 0.874621 |
| Benzene+cycloprop-1-enylidene | 0.0984549   | 0.972117 | 0.0984223   | 0.973043 |
| Ph+MeAc                       | 0.00470570  | 0.976823 | 0.00471086  | 0.977754 |
| Ph+Allene                     | 0.00464760  | 0.981470 | 0.00465271  | 0.982407 |
| C2H2+PhCH2                    | 0.00447301  | 0.985943 | 0.00447791  | 0.986885 |
| PhCH2CCH+H                    | 0.00304819  | 0.988991 | 0.00305154  | 0.989936 |
| PhcycC3H3_A+H                 | 0.00198976  | 0.990981 | 0.00199195  | 0.991928 |
| PhcycC3H3_B+H                 | 0.00193280  | 0.992914 | 0.00193492  | 0.993863 |
| PhCCCH3+H                     | 0.00187667  | 0.994791 | 0.00187873  | 0.995742 |
| rad67                         | 0.00179097  | 0.996582 | 0.00179294  | 0.997535 |
| PhCCH+CH3                     | 0.00117783  | 0.997759 | 0.00117912  | 0.998714 |
| Phenyl+cycC3H4                | 0.000956146 | 0.998716 | 0.000000    | 0.998714 |
| rad35                         | 0.000644848 | 0.999360 | 0.000645555 | 0.999360 |
| PAH10+CH3                     | 0.000194190 | 0.999555 | 0.000194404 | 0.999554 |
| rad37                         | 0.000129807 | 0.999684 | 0.000129949 | 0.999684 |
| PAH7+H                        | 0.000116417 | 0.999801 | 0.000116546 | 0.999800 |
| PAH9+H                        | 4.88535e-05 | 0.999850 | 4.89071e-05 | 0.999849 |
| rad38                         | 4.16011e-05 | 0.999891 | 4.16467e-05 | 0.999891 |
| PAH3+H                        | 3.23374e-05 | 0.999924 | 3.23729e-05 | 0.999923 |
| rad30                         | 2.62808e-05 | 0.999950 | 2.63097e-05 | 0.999950 |
| rad39                         | 1.87895e-05 | 0.999969 | 1.88102e-05 | 0.999968 |
| rad46                         | 7.16199e-06 | 0.999976 | 7.16986e-06 | 0.999976 |
| rad50                         | 5.93797e-06 | 0.999982 | 5.94449e-06 | 0.999982 |
| PAH1+H                        | 3.25722e-06 | 0.999985 | 3.26081e-06 | 0.999985 |
| rad59                         | 3.16156e-06 | 0.999988 | 3.16503e-06 | 0.999988 |
| rad60syn                      | 2.67968e-06 | 0.999991 | 2.68262e-06 | 0.999991 |
| rad54                         | 2.39838e-06 | 0.999993 | 2.40102e-06 | 0.999993 |
| rad60anti                     | 1.66867e-06 | 0.999995 | 1.67050e-06 | 0.999995 |
| rad51                         | 1.57342e-06 | 0.999996 | 1.57515e-06 | 0.999996 |
| rad43                         | 9.05576e-07 | 0.999997 | 9.06568e-07 | 0.999997 |
| rad70                         | 8.42763e-07 | 0.999998 | 8.43688e-07 | 0.999998 |
| rad52                         | 4.92950e-07 | 0.999999 | 4.93491e-07 | 0.999999 |
| rad58                         | 3.04448e-07 | 0.999999 | 3.04782e-07 | 0.999999 |
| rad61                         | 2.56145e-07 | 0.999999 | 2.56426e-07 | 0.999999 |
| rad34                         | 2.04934e-07 | 1.000000 | 2.05159e-07 | 0.999999 |

|           |             |          |             |          |
|-----------|-------------|----------|-------------|----------|
| rad55     | 1.72012e-07 | 1.000000 | 1.72201e-07 | 1.000000 |
| rad62     | 6.20586e-08 | 1.000000 | 6.21267e-08 | 1.000000 |
| rad41     | 5.99063e-08 | 1.000000 | 5.99721e-08 | 1.000000 |
| PAH8+H    | 5.38671e-08 | 1.000000 | 5.39262e-08 | 1.000000 |
| rad65     | 4.55485e-08 | 1.000000 | 4.55985e-08 | 1.000000 |
| rad53     | 4.12866e-08 | 1.000000 | 4.13319e-08 | 1.000000 |
| rad56     | 3.95671e-08 | 1.000000 | 3.96106e-08 | 1.000000 |
| rad71     | 3.49994e-08 | 1.000000 | 3.50378e-08 | 1.000000 |
| rad73     | 2.80690e-08 | 1.000000 | 2.80999e-08 | 1.000000 |
| rad64     | 1.41255e-08 | 1.000000 | 1.41409e-08 | 1.000000 |
| rad68syn  | 1.26336e-08 | 1.000000 | 1.26475e-08 | 1.000000 |
| rad40syn  | 8.93581e-09 | 1.000000 | 8.94564e-09 | 1.000000 |
| rad68anti | 8.24821e-09 | 1.000000 | 8.25726e-09 | 1.000000 |
| rad40anti | 7.05383e-09 | 1.000000 | 7.06153e-09 | 1.000000 |
| rad42     | 4.46777e-09 | 1.000000 | 4.47268e-09 | 1.000000 |
| rad72     | 9.20557e-10 | 1.000000 | 9.21571e-10 | 1.000000 |
| rad9      | 8.15900e-10 | 1.000000 | 8.16795e-10 | 1.000000 |
| rad15     | 7.63026e-12 | 1.000000 | 7.63864e-12 | 1.000000 |
| rad12     | 3.66370e-12 | 1.000000 | 3.66773e-12 | 1.000000 |
| rad23     | 5.42666e-13 | 1.000000 | 5.43262e-13 | 1.000000 |
| rad11     | 2.21533e-13 | 1.000000 | 2.21775e-13 | 1.000000 |
| rad6      | 2.16945e-13 | 1.000000 | 2.17184e-13 | 1.000000 |
| rad45     | 1.72305e-13 | 1.000000 | 1.72494e-13 | 1.000000 |
| rad19anti | 9.04718e-14 | 1.000000 | 9.05717e-14 | 1.000000 |
| rad7      | 7.09093e-14 | 1.000000 | 7.09876e-14 | 1.000000 |
| rad8      | 6.24614e-14 | 1.000000 | 6.25300e-14 | 1.000000 |
| rad10     | 5.52720e-14 | 1.000000 | 5.53327e-14 | 1.000000 |
| rad2      | 5.11887e-14 | 1.000000 | 5.12449e-14 | 1.000000 |
| rad21     | 3.97612e-14 | 1.000000 | 3.98048e-14 | 1.000000 |
| rad13     | 2.43544e-14 | 1.000000 | 2.43812e-14 | 1.000000 |
| rad36     | 1.80711e-14 | 1.000000 | 1.80910e-14 | 1.000000 |
| rad1      | 1.52675e-14 | 1.000000 | 1.52843e-14 | 1.000000 |
| rad18     | 1.01414e-14 | 1.000000 | 1.01526e-14 | 1.000000 |
| rad20     | 8.29649e-15 | 1.000000 | 8.30560e-15 | 1.000000 |
| rad19syn  | 7.89908e-15 | 1.000000 | 7.90771e-15 | 1.000000 |
| rad26     | 2.98602e-15 | 1.000000 | 2.98930e-15 | 1.000000 |
| rad24     | 1.99082e-15 | 1.000000 | 1.99301e-15 | 1.000000 |
| rad33     | 1.52243e-15 | 1.000000 | 1.52410e-15 | 1.000000 |
| rad25     | 8.67515e-16 | 1.000000 | 8.68467e-16 | 1.000000 |
| rad27     | 3.81187e-16 | 1.000000 | 3.81605e-16 | 1.000000 |
| rad3      | 3.79873e-16 | 1.000000 | 3.80290e-16 | 1.000000 |
| rad4      | 3.04143e-16 | 1.000000 | 3.04478e-16 | 1.000000 |
| rad22     | 1.20309e-16 | 1.000000 | 1.20441e-16 | 1.000000 |
| rad28     | 9.19472e-17 | 1.000000 | 9.20480e-17 | 1.000000 |
| rad14     | 3.12718e-17 | 1.000000 | 3.13061e-17 | 1.000000 |
| rad31     | 2.56266e-17 | 1.000000 | 2.56547e-17 | 1.000000 |
| rad47     | 1.33181e-17 | 1.000000 | 1.33327e-17 | 1.000000 |
| rad5      | 3.32915e-18 | 1.000000 | 3.33280e-18 | 1.000000 |

0.100000000E-03 Pa, 20.000000 K

=====

| Rate constant             | True (fraction)         | Effective (fraction)    |
|---------------------------|-------------------------|-------------------------|
| Total                     | 1.24541e-22 (1.00 )     | 1.24541e-22 (1.00 )     |
| Formation of rad19        | 1.24541e-22 (1.00 )     | 1.24541e-22 (1.00 )     |
| H-abstraction to cyc2enyl | 3.84323e-68 (3.09e-46)  | 3.84323e-68 (3.09e-46)  |
| H-abstraction to cyclenyl | 6.26313e-106 (5.03e-84) | 6.26313e-106 (5.03e-84) |

| species    | PYtrue      | Cumul    | PYeffective | Cumul    |
|------------|-------------|----------|-------------|----------|
| Indene+H   | 0.999772    | 0.999772 | 0.999772    | 0.999772 |
| PhCHCCH2+H | 0.000217188 | 0.999989 | 0.000217188 | 0.999989 |
| PhCCH+CH3  | 3.74982e-06 | 0.999993 | 3.74982e-06 | 0.999993 |
| C2H2+PhCH2 | 2.66054e-06 | 0.999996 | 2.66054e-06 | 0.999996 |
| PhCCCH3+H  | 2.10742e-06 | 0.999998 | 2.10742e-06 | 0.999998 |
| Ph+MeAc    | 1.55531e-06 | 0.999999 | 1.55531e-06 | 0.999999 |
| rad67      | 4.72011e-07 | 1.000000 | 4.72011e-07 | 1.000000 |
| rad35      | 2.09057e-07 | 1.000000 | 2.09057e-07 | 1.000000 |
| Ph+Allene  | 1.34591e-07 | 1.000000 | 1.34591e-07 | 1.000000 |
| PAH7+H     | 1.78319e-08 | 1.000000 | 1.78319e-08 | 1.000000 |
| PhCH2CCH+H | 1.63526e-08 | 1.000000 | 1.63526e-08 | 1.000000 |
| rad39      | 5.02864e-09 | 1.000000 | 5.02864e-09 | 1.000000 |
| rad37      | 4.62661e-09 | 1.000000 | 4.62661e-09 | 1.000000 |
| rad30      | 3.90772e-09 | 1.000000 | 3.90772e-09 | 1.000000 |
| PAH9+H     | 2.53908e-10 | 1.000000 | 2.53908e-10 | 1.000000 |
| rad38      | 1.06917e-10 | 1.000000 | 1.06917e-10 | 1.000000 |
| rad60syn   | 1.69313e-11 | 1.000000 | 1.69313e-11 | 1.000000 |
| rad60anti  | 8.26525e-12 | 1.000000 | 8.26525e-12 | 1.000000 |
| PAH3+H     | 6.72117e-12 | 1.000000 | 6.72117e-12 | 1.000000 |
| rad46      | 6.42418e-12 | 1.000000 | 6.42418e-12 | 1.000000 |

|                               |             |         |             |         |
|-------------------------------|-------------|---------|-------------|---------|
| PAH10+CH3                     | 5.52847e-12 | 1.00000 | 5.52847e-12 | 1.00000 |
| rad59                         | 1.39460e-12 | 1.00000 | 1.39460e-12 | 1.00000 |
| PhcycC3H3_A+H                 | 4.13670e-13 | 1.00000 | 4.13670e-13 | 1.00000 |
| rad43                         | 2.58790e-13 | 1.00000 | 2.58790e-13 | 1.00000 |
| rad54                         | 2.05615e-13 | 1.00000 | 2.05615e-13 | 1.00000 |
| rad62                         | 5.54189e-14 | 1.00000 | 5.54189e-14 | 1.00000 |
| rad50                         | 4.23119e-14 | 1.00000 | 4.23119e-14 | 1.00000 |
| rad70                         | 3.14077e-15 | 1.00000 | 3.14077e-15 | 1.00000 |
| rad55                         | 1.37668e-15 | 1.00000 | 1.37668e-15 | 1.00000 |
| PAH1+H                        | 5.58140e-16 | 1.00000 | 5.58140e-16 | 1.00000 |
| rad52                         | 2.67660e-16 | 1.00000 | 2.67660e-16 | 1.00000 |
| rad58                         | 7.50158e-17 | 1.00000 | 7.50158e-17 | 1.00000 |
| rad51                         | 6.49246e-17 | 1.00000 | 6.49246e-17 | 1.00000 |
| rad34                         | 2.90719e-17 | 1.00000 | 2.90719e-17 | 1.00000 |
| Phenyl+cycC3H4                | 2.77347e-17 | 1.00000 | 0.00000     | 1.00000 |
| rad42                         | 3.04704e-18 | 1.00000 | 3.04704e-18 | 1.00000 |
| rad41                         | 2.76363e-18 | 1.00000 | 2.76363e-18 | 1.00000 |
| rad65                         | 1.27621e-18 | 1.00000 | 1.27621e-18 | 1.00000 |
| rad6                          | 7.05671e-20 | 1.00000 | 7.05671e-20 | 1.00000 |
| rad28                         | 6.51335e-23 | 1.00000 | 6.51335e-23 | 1.00000 |
| rad2                          | 3.81583e-23 | 1.00000 | 3.81583e-23 | 1.00000 |
| rad26                         | 8.05172e-24 | 1.00000 | 8.05172e-24 | 1.00000 |
| rad7                          | 5.33670e-24 | 1.00000 | 5.33670e-24 | 1.00000 |
| rad1                          | 2.41034e-24 | 1.00000 | 2.41034e-24 | 1.00000 |
| rad10                         | 1.95884e-24 | 1.00000 | 1.95884e-24 | 1.00000 |
| rad11                         | 1.32214e-24 | 1.00000 | 1.32214e-24 | 1.00000 |
| rad3                          | 2.40831e-25 | 1.00000 | 2.40831e-25 | 1.00000 |
| rad4                          | 1.21637e-25 | 1.00000 | 1.21637e-25 | 1.00000 |
| rad13                         | 2.81254e-26 | 1.00000 | 2.81254e-26 | 1.00000 |
| PhcycC3H3_B+H                 | 2.48384e-27 | 1.00000 | 2.48384e-27 | 1.00000 |
| rad53                         | 1.12520e-28 | 1.00000 | 1.12520e-28 | 1.00000 |
| rad9                          | 1.04992e-28 | 1.00000 | 1.04992e-28 | 1.00000 |
| rad47                         | 5.37034e-29 | 1.00000 | 5.37034e-29 | 1.00000 |
| rad33                         | 5.27980e-29 | 1.00000 | 5.27980e-29 | 1.00000 |
| rad14                         | 2.85829e-29 | 1.00000 | 2.85829e-29 | 1.00000 |
| rad27                         | 2.22496e-29 | 1.00000 | 2.22496e-29 | 1.00000 |
| rad25                         | 1.92634e-29 | 1.00000 | 1.92634e-29 | 1.00000 |
| rad64                         | 4.93429e-31 | 1.00000 | 4.93429e-31 | 1.00000 |
| rad23                         | 7.42782e-32 | 1.00000 | 7.42782e-32 | 1.00000 |
| rad15                         | 4.53689e-32 | 1.00000 | 4.53689e-32 | 1.00000 |
| rad5                          | 1.22699e-32 | 1.00000 | 1.22699e-32 | 1.00000 |
| rad19anti                     | 1.76257e-33 | 1.00000 | 1.76257e-33 | 1.00000 |
| rad31                         | 6.84695e-34 | 1.00000 | 6.84695e-34 | 1.00000 |
| rad45                         | 6.40022e-34 | 1.00000 | 6.40022e-34 | 1.00000 |
| rad20                         | 1.26352e-34 | 1.00000 | 1.26352e-34 | 1.00000 |
| rad21                         | 9.29249e-35 | 1.00000 | 9.29249e-35 | 1.00000 |
| rad22                         | 4.47216e-35 | 1.00000 | 4.47216e-35 | 1.00000 |
| rad36                         | 3.92547e-35 | 1.00000 | 3.92547e-35 | 1.00000 |
| rad18                         | 5.95429e-37 | 1.00000 | 5.95429e-37 | 1.00000 |
| rad12                         | 4.92745e-37 | 1.00000 | 4.92745e-37 | 1.00000 |
| rad61                         | 5.04120e-38 | 1.00000 | 5.04120e-38 | 1.00000 |
| rad56                         | 3.42583e-40 | 1.00000 | 3.42583e-40 | 1.00000 |
| rad24                         | 1.38456e-41 | 1.00000 | 1.38456e-41 | 1.00000 |
| rad68syn                      | 2.58422e-42 | 1.00000 | 2.58422e-42 | 1.00000 |
| rad68anti                     | 2.21157e-42 | 1.00000 | 2.21157e-42 | 1.00000 |
| rad19syn                      | 1.37416e-43 | 1.00000 | 1.37416e-43 | 1.00000 |
| Benzene+cycloprop-2-enylidene | 3.08591e-46 | 1.00000 | 3.08591e-46 | 1.00000 |
| rad73                         | 2.10794e-50 | 1.00000 | 2.10794e-50 | 1.00000 |
| rad40syn                      | 2.95060e-51 | 1.00000 | 2.95060e-51 | 1.00000 |
| rad40anti                     | 2.43130e-51 | 1.00000 | 2.43130e-51 | 1.00000 |
| PAH8+H                        | 1.12919e-55 | 1.00000 | 1.12919e-55 | 1.00000 |
| rad71                         | 3.55939e-59 | 1.00000 | 3.55939e-59 | 1.00000 |
| rad8                          | 2.40476e-63 | 1.00000 | 2.40476e-63 | 1.00000 |
| Benzene+cycloprop-1-enylidene | 5.02895e-84 | 1.00000 | 5.02895e-84 | 1.00000 |

0.100000000E-03 Pa, 30.0000000 K

| Rate constant             | True (fraction)        | Effective (fraction)   |
|---------------------------|------------------------|------------------------|
| Total                     | 8.13009e-20 (1.00 )    | 8.13009e-20 (1.00 )    |
| Formation of rad19        | 8.13009e-20 (1.00 )    | 8.13009e-20 (1.00 )    |
| H-abstraction to cyc2enyl | 1.08880e-49 (1.34e-30) | 1.08880e-49 (1.34e-30) |
| H-abstraction to cyclenyl | 7.55172e-75 (9.29e-56) | 7.55172e-75 (9.29e-56) |

| species    | PYtrue      | Cumul    | PYeffective | Cumul    |
|------------|-------------|----------|-------------|----------|
| Indene+H   | 0.999770    | 0.999770 | 0.999770    | 0.999770 |
| PhCHCCH2+H | 0.000218739 | 0.999989 | 0.000218739 | 0.999989 |
| PhCCH+CH3  | 3.77917e-06 | 0.999993 | 3.77917e-06 | 0.999993 |
| C2H2+PhCH2 | 2.68532e-06 | 0.999995 | 2.68532e-06 | 0.999995 |



|                               |             |          |             |          |
|-------------------------------|-------------|----------|-------------|----------|
| PhCCCH3+H                     | 2.12542e-06 | 0.999997 | 2.12542e-06 | 0.999997 |
| Ph+MeAc                       | 1.57149e-06 | 0.999999 | 1.57149e-06 | 0.999999 |
| rad67                         | 4.76657e-07 | 0.999999 | 4.76657e-07 | 0.999999 |
| rad35                         | 2.11030e-07 | 1.000000 | 2.11030e-07 | 1.000000 |
| Ph+Allene                     | 1.36475e-07 | 1.000000 | 1.36475e-07 | 1.000000 |
| PAH7+H                        | 1.80463e-08 | 1.000000 | 1.80463e-08 | 1.000000 |
| PhCH2CCH+H                    | 1.66180e-08 | 1.000000 | 1.66180e-08 | 1.000000 |
| rad39                         | 5.08931e-09 | 1.000000 | 5.08931e-09 | 1.000000 |
| rad37                         | 4.68496e-09 | 1.000000 | 4.68496e-09 | 1.000000 |
| rad30                         | 3.94534e-09 | 1.000000 | 3.94534e-09 | 1.000000 |
| PAH9+H                        | 2.57081e-10 | 1.000000 | 2.57081e-10 | 1.000000 |
| rad38                         | 1.08374e-10 | 1.000000 | 1.08374e-10 | 1.000000 |
| rad60syn                      | 1.71585e-11 | 1.000000 | 1.71585e-11 | 1.000000 |
| rad60anti                     | 8.37897e-12 | 1.000000 | 8.37897e-12 | 1.000000 |
| PAH3+H                        | 6.84307e-12 | 1.000000 | 6.84307e-12 | 1.000000 |
| rad46                         | 6.51872e-12 | 1.000000 | 6.51872e-12 | 1.000000 |
| PAH10+CH3                     | 5.67104e-12 | 1.000000 | 5.67104e-12 | 1.000000 |
| rad59                         | 1.41892e-12 | 1.000000 | 1.41892e-12 | 1.000000 |
| PhcycC3H3_A+H                 | 4.42418e-13 | 1.000000 | 4.42418e-13 | 1.000000 |
| rad43                         | 2.64733e-13 | 1.000000 | 2.64733e-13 | 1.000000 |
| rad54                         | 2.10918e-13 | 1.000000 | 2.10918e-13 | 1.000000 |
| rad62                         | 5.67445e-14 | 1.000000 | 5.67445e-14 | 1.000000 |
| rad50                         | 4.32162e-14 | 1.000000 | 4.32162e-14 | 1.000000 |
| rad70                         | 3.24678e-15 | 1.000000 | 3.24678e-15 | 1.000000 |
| rad55                         | 1.42431e-15 | 1.000000 | 1.42431e-15 | 1.000000 |
| PAH1+H                        | 5.84622e-16 | 1.000000 | 5.84622e-16 | 1.000000 |
| rad52                         | 2.74742e-16 | 1.000000 | 2.74742e-16 | 1.000000 |
| rad58                         | 7.77894e-17 | 1.000000 | 7.77894e-17 | 1.000000 |
| rad51                         | 6.70457e-17 | 1.000000 | 6.70457e-17 | 1.000000 |
| Phenyl+cycC3H4                | 5.25631e-17 | 1.000000 | 0.00000     | 1.000000 |
| rad34                         | 3.05572e-17 | 1.000000 | 3.05572e-17 | 1.000000 |
| rad42                         | 3.20788e-18 | 1.000000 | 3.20788e-18 | 1.000000 |
| rad41                         | 2.96166e-18 | 1.000000 | 2.96166e-18 | 1.000000 |
| rad65                         | 1.32203e-18 | 1.000000 | 1.32203e-18 | 1.000000 |
| rad6                          | 3.17325e-21 | 1.000000 | 3.17325e-21 | 1.000000 |
| rad28                         | 3.15242e-24 | 1.000000 | 3.15242e-24 | 1.000000 |
| rad2                          | 1.59157e-24 | 1.000000 | 1.59157e-24 | 1.000000 |
| rad26                         | 3.88789e-25 | 1.000000 | 3.88789e-25 | 1.000000 |
| rad7                          | 2.34888e-25 | 1.000000 | 2.34888e-25 | 1.000000 |
| rad1                          | 1.00588e-25 | 1.000000 | 1.00588e-25 | 1.000000 |
| rad10                         | 8.08642e-26 | 1.000000 | 8.08642e-26 | 1.000000 |
| rad11                         | 5.80191e-26 | 1.000000 | 5.80191e-26 | 1.000000 |
| rad3                          | 9.99333e-27 | 1.000000 | 9.99333e-27 | 1.000000 |
| rad4                          | 5.04791e-27 | 1.000000 | 5.04791e-27 | 1.000000 |
| PhcycC3H3_B+H                 | 1.91387e-27 | 1.000000 | 1.91387e-27 | 1.000000 |
| rad13                         | 1.26509e-27 | 1.000000 | 1.26509e-27 | 1.000000 |
| rad53                         | 8.33623e-29 | 1.000000 | 8.33623e-29 | 1.000000 |
| rad47                         | 2.66378e-29 | 1.000000 | 2.66378e-29 | 1.000000 |
| rad9                          | 7.43481e-30 | 1.000000 | 7.43481e-30 | 1.000000 |
| rad33                         | 2.37571e-30 | 1.000000 | 2.37571e-30 | 1.000000 |
| Benzene+cycloprop-2-enylidene | 1.33923e-30 | 1.000000 | 1.33923e-30 | 1.000000 |
| rad14                         | 1.31613e-30 | 1.000000 | 1.31613e-30 | 1.000000 |
| rad27                         | 9.60487e-31 | 1.000000 | 9.60487e-31 | 1.000000 |
| rad25                         | 8.88784e-31 | 1.000000 | 8.88784e-31 | 1.000000 |
| rad64                         | 3.67899e-31 | 1.000000 | 3.67899e-31 | 1.000000 |
| rad15                         | 3.21345e-33 | 1.000000 | 3.21345e-33 | 1.000000 |
| rad5                          | 2.23116e-33 | 1.000000 | 2.23116e-33 | 1.000000 |
| rad19anti                     | 9.44048e-34 | 1.000000 | 9.44048e-34 | 1.000000 |
| rad23                         | 5.65328e-34 | 1.000000 | 5.65328e-34 | 1.000000 |
| rad31                         | 2.87754e-35 | 1.000000 | 2.87754e-35 | 1.000000 |
| rad20                         | 5.72256e-36 | 1.000000 | 5.72256e-36 | 1.000000 |
| rad45                         | 4.55967e-36 | 1.000000 | 4.55967e-36 | 1.000000 |
| rad21                         | 4.21149e-36 | 1.000000 | 4.21149e-36 | 1.000000 |
| rad22                         | 5.07383e-37 | 1.000000 | 5.07383e-37 | 1.000000 |
| rad36                         | 2.79611e-37 | 1.000000 | 2.79611e-37 | 1.000000 |
| rad61                         | 3.99867e-38 | 1.000000 | 3.99867e-38 | 1.000000 |
| rad12                         | 3.49320e-38 | 1.000000 | 3.49320e-38 | 1.000000 |
| rad18                         | 2.51264e-38 | 1.000000 | 2.51264e-38 | 1.000000 |
| rad56                         | 2.64182e-40 | 1.000000 | 2.64182e-40 | 1.000000 |
| rad68syn                      | 2.00866e-42 | 1.000000 | 2.00866e-42 | 1.000000 |
| rad68anti                     | 1.71858e-42 | 1.000000 | 1.71858e-42 | 1.000000 |
| rad24                         | 2.17080e-43 | 1.000000 | 2.17080e-43 | 1.000000 |
| rad19syn                      | 8.38610e-44 | 1.000000 | 8.38610e-44 | 1.000000 |
| rad73                         | 1.68406e-50 | 1.000000 | 1.68406e-50 | 1.000000 |
| rad40syn                      | 2.57877e-51 | 1.000000 | 2.57877e-51 | 1.000000 |
| rad40anti                     | 2.12476e-51 | 1.000000 | 2.12476e-51 | 1.000000 |
| PAH8+H                        | 1.00940e-55 | 1.000000 | 1.00940e-55 | 1.000000 |
| Benzene+cycloprop-1-enylidene | 9.28861e-56 | 1.000000 | 9.28861e-56 | 1.000000 |
| rad71                         | 2.99028e-59 | 1.000000 | 2.99028e-59 | 1.000000 |
| rad8                          | 1.26743e-63 | 1.000000 | 1.26743e-63 | 1.000000 |

0.100000000E-03 Pa, 40.0000000 K

=====

| Rate constant             | True (fraction)        | Effective (fraction)   |
|---------------------------|------------------------|------------------------|
| Total                     | 2.24819e-18 (1.00 )    | 2.24819e-18 (1.00 )    |
| Formation of rad19        | 2.24819e-18 (1.00 )    | 2.24819e-18 (1.00 )    |
| H-abstraction to cyc2enyl | 1.72361e-40 (7.67e-23) | 1.72361e-40 (7.67e-23) |
| H-abstraction to cyclenyl | 2.48792e-59 (1.11e-41) | 2.48792e-59 (1.11e-41) |

| species                       | PYtrue      | Cumul    | PYeffective | Cumul    |
|-------------------------------|-------------|----------|-------------|----------|
| Indene+H                      | 0.999767    | 0.999767 | 0.999767    | 0.999767 |
| PhCHCCH2+H                    | 0.000221747 | 0.999989 | 0.000221747 | 0.999989 |
| PhCCH+CH3                     | 3.83601e-06 | 0.999993 | 3.83601e-06 | 0.999993 |
| C2H2+PhCH2                    | 2.73332e-06 | 0.999995 | 2.73332e-06 | 0.999995 |
| PhCCCH3+H                     | 2.16037e-06 | 0.999997 | 2.16037e-06 | 0.999997 |
| Ph+MeAc                       | 1.60298e-06 | 0.999999 | 1.60298e-06 | 0.999999 |
| rad67                         | 4.85696e-07 | 1.000000 | 4.85696e-07 | 1.000000 |
| rad35                         | 2.14866e-07 | 1.000000 | 2.14866e-07 | 1.000000 |
| Ph+Allene                     | 1.40123e-07 | 1.000000 | 1.40123e-07 | 1.000000 |
| PAH7+H                        | 1.84602e-08 | 1.000000 | 1.84602e-08 | 1.000000 |
| PhCH2CCH+H                    | 1.71333e-08 | 1.000000 | 1.71333e-08 | 1.000000 |
| rad39                         | 5.20646e-09 | 1.000000 | 5.20646e-09 | 1.000000 |
| rad37                         | 4.79884e-09 | 1.000000 | 4.79884e-09 | 1.000000 |
| rad30                         | 4.01850e-09 | 1.000000 | 4.01850e-09 | 1.000000 |
| PAH9+H                        | 2.63239e-10 | 1.000000 | 2.63239e-10 | 1.000000 |
| rad38                         | 1.11208e-10 | 1.000000 | 1.11208e-10 | 1.000000 |
| rad60syn                      | 1.76024e-11 | 1.000000 | 1.76024e-11 | 1.000000 |
| rad60anti                     | 8.60125e-12 | 1.000000 | 8.60125e-12 | 1.000000 |
| PAH3+H                        | 7.08270e-12 | 1.000000 | 7.08270e-12 | 1.000000 |
| rad46                         | 6.70250e-12 | 1.000000 | 6.70250e-12 | 1.000000 |
| PAH10+CH3                     | 5.95394e-12 | 1.000000 | 5.95394e-12 | 1.000000 |
| rad59                         | 1.46669e-12 | 1.000000 | 1.46669e-12 | 1.000000 |
| PhcycC3H3_A+H                 | 5.01392e-13 | 1.000000 | 5.01392e-13 | 1.000000 |
| rad43                         | 2.76474e-13 | 1.000000 | 2.76474e-13 | 1.000000 |
| rad54                         | 2.21305e-13 | 1.000000 | 2.21305e-13 | 1.000000 |
| rad62                         | 5.93595e-14 | 1.000000 | 5.93595e-14 | 1.000000 |
| rad50                         | 4.49875e-14 | 1.000000 | 4.49875e-14 | 1.000000 |
| rad70                         | 3.45711e-15 | 1.000000 | 3.45711e-15 | 1.000000 |
| rad55                         | 1.51845e-15 | 1.000000 | 1.51845e-15 | 1.000000 |
| PAH1+H                        | 6.38275e-16 | 1.000000 | 6.38275e-16 | 1.000000 |
| rad52                         | 2.88701e-16 | 1.000000 | 2.88701e-16 | 1.000000 |
| Phenyl+cycC3H4                | 1.15738e-16 | 1.000000 | 0.000000    | 1.000000 |
| rad58                         | 8.33636e-17 | 1.000000 | 8.33636e-17 | 1.000000 |
| rad51                         | 7.12616e-17 | 1.000000 | 7.12616e-17 | 1.000000 |
| rad34                         | 3.35108e-17 | 1.000000 | 3.35108e-17 | 1.000000 |
| rad42                         | 3.55402e-18 | 1.000000 | 3.55402e-18 | 1.000000 |
| rad41                         | 3.38707e-18 | 1.000000 | 3.38707e-18 | 1.000000 |
| rad65                         | 1.41344e-18 | 1.000000 | 1.41344e-18 | 1.000000 |
| rad6                          | 5.85420e-22 | 1.000000 | 5.85420e-22 | 1.000000 |
| Benzene+cycloprop-2-enylidene | 7.66665e-23 | 1.000000 | 7.66665e-23 | 1.000000 |
| PhcycC3H3_B+H                 | 8.34135e-25 | 1.000000 | 8.34135e-25 | 1.000000 |
| rad28                         | 6.18208e-25 | 1.000000 | 6.18208e-25 | 1.000000 |
| rad2                          | 2.82327e-25 | 1.000000 | 2.82327e-25 | 1.000000 |
| rad26                         | 7.86128e-26 | 1.000000 | 7.86128e-26 | 1.000000 |
| rad7                          | 4.30016e-26 | 1.000000 | 4.30016e-26 | 1.000000 |
| rad1                          | 1.78632e-26 | 1.000000 | 1.78632e-26 | 1.000000 |
| rad10                         | 1.42977e-26 | 1.000000 | 1.42977e-26 | 1.000000 |
| rad11                         | 1.06072e-26 | 1.000000 | 1.06072e-26 | 1.000000 |
| rad3                          | 1.77095e-27 | 1.000000 | 1.77095e-27 | 1.000000 |
| rad4                          | 8.94760e-28 | 1.000000 | 8.94760e-28 | 1.000000 |
| rad13                         | 2.33606e-28 | 1.000000 | 2.33606e-28 | 1.000000 |
| rad53                         | 1.47801e-28 | 1.000000 | 1.47801e-28 | 1.000000 |
| rad47                         | 1.79847e-29 | 1.000000 | 1.79847e-29 | 1.000000 |
| rad9                          | 1.88075e-30 | 1.000000 | 1.88075e-30 | 1.000000 |
| rad64                         | 5.57634e-31 | 1.000000 | 5.57634e-31 | 1.000000 |
| rad33                         | 4.38883e-31 | 1.000000 | 4.38883e-31 | 1.000000 |
| rad14                         | 2.54155e-31 | 1.000000 | 2.54155e-31 | 1.000000 |
| rad27                         | 1.75192e-31 | 1.000000 | 1.75192e-31 | 1.000000 |
| rad25                         | 1.69858e-31 | 1.000000 | 1.69858e-31 | 1.000000 |
| rad5                          | 8.78473e-34 | 1.000000 | 8.78473e-34 | 1.000000 |
| rad15                         | 8.13453e-34 | 1.000000 | 8.13453e-34 | 1.000000 |
| rad19anti                     | 7.57842e-34 | 1.000000 | 7.57842e-34 | 1.000000 |
| rad23                         | 4.12261e-35 | 1.000000 | 4.12261e-35 | 1.000000 |
| rad31                         | 5.18560e-36 | 1.000000 | 5.18560e-36 | 1.000000 |
| rad20                         | 1.07816e-36 | 1.000000 | 1.07816e-36 | 1.000000 |
| rad21                         | 7.94116e-37 | 1.000000 | 7.94116e-37 | 1.000000 |
| rad45                         | 3.21315e-37 | 1.000000 | 3.21315e-37 | 1.000000 |
| rad61                         | 6.80485e-38 | 1.000000 | 6.80485e-38 | 1.000000 |

|                               |             |          |             |          |
|-------------------------------|-------------|----------|-------------|----------|
| rad22                         | 4.93640e-38 | 1.000000 | 4.93640e-38 | 1.000000 |
| rad36                         | 1.96972e-38 | 1.000000 | 1.96972e-38 | 1.000000 |
| rad12                         | 8.85772e-39 | 1.000000 | 8.85772e-39 | 1.000000 |
| rad18                         | 4.63116e-39 | 1.000000 | 4.63116e-39 | 1.000000 |
| rad56                         | 4.30865e-40 | 1.000000 | 4.30865e-40 | 1.000000 |
| Benzene+cycloprop-1-enylidene | 1.10663e-41 | 1.000000 | 1.10663e-41 | 1.000000 |
| rad68syn                      | 3.33359e-42 | 1.000000 | 3.33359e-42 | 1.000000 |
| rad68anti                     | 2.85061e-42 | 1.000000 | 2.85061e-42 | 1.000000 |
| rad19syn                      | 8.61360e-44 | 1.000000 | 8.61360e-44 | 1.000000 |
| rad24                         | 3.16765e-44 | 1.000000 | 3.16765e-44 | 1.000000 |
| rad73                         | 2.96992e-50 | 1.000000 | 2.96992e-50 | 1.000000 |
| rad40syn                      | 5.42428e-51 | 1.000000 | 5.42428e-51 | 1.000000 |
| rad40anti                     | 4.46764e-51 | 1.000000 | 4.46764e-51 | 1.000000 |
| PAH8+H                        | 2.23966e-55 | 1.000000 | 2.23966e-55 | 1.000000 |
| rad71                         | 5.90112e-59 | 1.000000 | 5.90112e-59 | 1.000000 |
| rad8                          | 9.75719e-64 | 1.000000 | 9.75719e-64 | 1.000000 |

0.100000000E-03 Pa, 50.0000000 K

=====

| Rate constant             | True (fraction)        | Effective (fraction)   |
|---------------------------|------------------------|------------------------|
| Total                     | 1.72707e-17 (1.00 )    | 1.72707e-17 (1.00 )    |
| Formation of rad19        | 1.72707e-17 (1.00 )    | 1.72707e-17 (1.00 )    |
| H-abstraction to cyc2enyl | 5.49905e-35 (3.18e-18) | 5.49905e-35 (3.18e-18) |
| H-abstraction to cyclenyl | 4.93090e-50 (2.86e-33) | 4.93090e-50 (2.86e-33) |

| species                       | PYtrue      | Cumul    | PYeffective | Cumul    |
|-------------------------------|-------------|----------|-------------|----------|
| Indene+H                      | 0.999763    | 0.999763 | 0.999763    | 0.999763 |
| PhCHCCH2+H                    | 0.000225657 | 0.999989 | 0.000225657 | 0.999989 |
| PhCCH+CH3                     | 3.90991e-06 | 0.999993 | 3.90991e-06 | 0.999993 |
| C2H2+PhCH2                    | 2.79599e-06 | 0.999995 | 2.79599e-06 | 0.999995 |
| PhCCCH3+H                     | 2.20592e-06 | 0.999998 | 2.20592e-06 | 0.999998 |
| Ph+MeAc                       | 1.64417e-06 | 0.999999 | 1.64417e-06 | 0.999999 |
| rad67                         | 4.97513e-07 | 1.000000 | 4.97513e-07 | 1.000000 |
| rad35                         | 2.19878e-07 | 1.000000 | 2.19878e-07 | 1.000000 |
| Ph+Allene                     | 1.44930e-07 | 1.000000 | 1.44930e-07 | 1.000000 |
| PAH7+H                        | 1.90034e-08 | 1.000000 | 1.90034e-08 | 1.000000 |
| PhCH2CCH+H                    | 1.78155e-08 | 1.000000 | 1.78155e-08 | 1.000000 |
| rad39                         | 5.36017e-09 | 1.000000 | 5.36017e-09 | 1.000000 |
| rad37                         | 4.94865e-09 | 1.000000 | 4.94865e-09 | 1.000000 |
| rad30                         | 4.11416e-09 | 1.000000 | 4.11416e-09 | 1.000000 |
| PAH9+H                        | 2.71338e-10 | 1.000000 | 2.71338e-10 | 1.000000 |
| rad38                         | 1.14948e-10 | 1.000000 | 1.14948e-10 | 1.000000 |
| rad60syn                      | 1.81879e-11 | 1.000000 | 1.81879e-11 | 1.000000 |
| rad60anti                     | 8.89457e-12 | 1.000000 | 8.89457e-12 | 1.000000 |
| PAH3+H                        | 7.40195e-12 | 1.000000 | 7.40195e-12 | 1.000000 |
| rad46                         | 6.94536e-12 | 1.000000 | 6.94536e-12 | 1.000000 |
| PAH10+CH3                     | 6.33656e-12 | 1.000000 | 6.33656e-12 | 1.000000 |
| rad59                         | 1.53023e-12 | 1.000000 | 1.53023e-12 | 1.000000 |
| PhcycC3H3_A+H                 | 5.85935e-13 | 1.000000 | 5.85935e-13 | 1.000000 |
| rad43                         | 2.92246e-13 | 1.000000 | 2.92246e-13 | 1.000000 |
| rad54                         | 2.35326e-13 | 1.000000 | 2.35326e-13 | 1.000000 |
| rad62                         | 6.28758e-14 | 1.000000 | 6.28758e-14 | 1.000000 |
| rad50                         | 4.73621e-14 | 1.000000 | 4.73621e-14 | 1.000000 |
| rad70                         | 3.74594e-15 | 1.000000 | 3.74594e-15 | 1.000000 |
| rad55                         | 1.64733e-15 | 1.000000 | 1.64733e-15 | 1.000000 |
| PAH1+H                        | 7.13889e-16 | 1.000000 | 7.13889e-16 | 1.000000 |
| rad52                         | 3.07612e-16 | 1.000000 | 3.07612e-16 | 1.000000 |
| Phenyl+cycC3H4                | 2.36668e-16 | 1.000000 | 0.000000    | 1.000000 |
| rad58                         | 9.10684e-17 | 1.000000 | 9.10684e-17 | 1.000000 |
| rad51                         | 7.70478e-17 | 1.000000 | 7.70478e-17 | 1.000000 |
| rad34                         | 3.76103e-17 | 1.000000 | 3.76103e-17 | 1.000000 |
| rad42                         | 4.07358e-18 | 1.000000 | 4.07358e-18 | 1.000000 |
| rad41                         | 4.02376e-18 | 1.000000 | 4.02376e-18 | 1.000000 |
| Benzene+cycloprop-2-enylidene | 3.18404e-18 | 1.000000 | 3.18404e-18 | 1.000000 |
| rad65                         | 1.53967e-18 | 1.000000 | 1.53967e-18 | 1.000000 |
| PhcycC3H3_B+H                 | 2.98290e-22 | 1.000000 | 2.98290e-22 | 1.000000 |
| rad6                          | 1.83810e-22 | 1.000000 | 1.83810e-22 | 1.000000 |
| rad28                         | 2.04506e-25 | 1.000000 | 2.04506e-25 | 1.000000 |
| rad2                          | 8.64030e-26 | 1.000000 | 8.64030e-26 | 1.000000 |
| rad26                         | 2.71578e-26 | 1.000000 | 2.71578e-26 | 1.000000 |
| rad7                          | 1.34541e-26 | 1.000000 | 1.34541e-26 | 1.000000 |
| rad53                         | 8.42904e-27 | 1.000000 | 8.42904e-27 | 1.000000 |
| rad1                          | 5.47567e-27 | 1.000000 | 5.47567e-27 | 1.000000 |
| rad10                         | 4.37108e-27 | 1.000000 | 4.37108e-27 | 1.000000 |
| rad11                         | 3.31606e-27 | 1.000000 | 3.31606e-27 | 1.000000 |
| rad3                          | 5.42050e-28 | 1.000000 | 5.42050e-28 | 1.000000 |
| rad4                          | 2.73961e-28 | 1.000000 | 2.73961e-28 | 1.000000 |
| rad13                         | 7.34483e-29 | 1.000000 | 7.34483e-29 | 1.000000 |

|                               |             |         |             |         |
|-------------------------------|-------------|---------|-------------|---------|
| rad47                         | 1.37482e-29 | 1.00000 | 1.37482e-29 | 1.00000 |
| rad64                         | 7.15076e-30 | 1.00000 | 7.15076e-30 | 1.00000 |
| rad9                          | 7.82736e-31 | 1.00000 | 7.82736e-31 | 1.00000 |
| rad33                         | 1.38069e-31 | 1.00000 | 1.38069e-31 | 1.00000 |
| rad14                         | 8.51679e-32 | 1.00000 | 8.51679e-32 | 1.00000 |
| rad25                         | 5.59665e-32 | 1.00000 | 5.59665e-32 | 1.00000 |
| rad27                         | 5.50489e-32 | 1.00000 | 5.50489e-32 | 1.00000 |
| Benzene+cycloprop-1-enylidene | 2.85507e-33 | 1.00000 | 2.85507e-33 | 1.00000 |
| rad19anti                     | 7.56831e-34 | 1.00000 | 7.56831e-34 | 1.00000 |
| rad5                          | 4.64387e-34 | 1.00000 | 4.64387e-34 | 1.00000 |
| rad15                         | 3.38855e-34 | 1.00000 | 3.38855e-34 | 1.00000 |
| rad23                         | 7.06855e-36 | 1.00000 | 7.06855e-36 | 1.00000 |
| rad31                         | 1.63466e-36 | 1.00000 | 1.63466e-36 | 1.00000 |
| rad20                         | 3.49161e-37 | 1.00000 | 3.49161e-37 | 1.00000 |
| rad21                         | 2.57449e-37 | 1.00000 | 2.57449e-37 | 1.00000 |
| rad61                         | 1.95187e-37 | 1.00000 | 1.95187e-37 | 1.00000 |
| rad45                         | 5.38706e-38 | 1.00000 | 5.38706e-38 | 1.00000 |
| rad22                         | 1.05432e-38 | 1.00000 | 1.05432e-38 | 1.00000 |
| rad12                         | 3.69921e-39 | 1.00000 | 3.69921e-39 | 1.00000 |
| rad36                         | 3.30099e-39 | 1.00000 | 3.30099e-39 | 1.00000 |
| rad18                         | 1.48611e-39 | 1.00000 | 1.48611e-39 | 1.00000 |
| rad56                         | 1.18885e-39 | 1.00000 | 1.18885e-39 | 1.00000 |
| rad68syn                      | 9.42829e-42 | 1.00000 | 9.42829e-42 | 1.00000 |
| rad68anti                     | 8.05588e-42 | 1.00000 | 8.05588e-42 | 1.00000 |
| rad19syn                      | 1.15714e-43 | 1.00000 | 1.15714e-43 | 1.00000 |
| rad24                         | 9.70444e-45 | 1.00000 | 9.70444e-45 | 1.00000 |
| rad73                         | 9.18459e-50 | 1.00000 | 9.18459e-50 | 1.00000 |
| rad40syn                      | 2.11730e-50 | 1.00000 | 2.11730e-50 | 1.00000 |
| rad40anti                     | 1.74240e-50 | 1.00000 | 1.74240e-50 | 1.00000 |
| PAH8+H                        | 9.51794e-55 | 1.00000 | 9.51794e-55 | 1.00000 |
| rad71                         | 2.16600e-58 | 1.00000 | 2.16600e-58 | 1.00000 |
| rad8                          | 9.04795e-64 | 1.00000 | 9.04795e-64 | 1.00000 |

0.100000000E-03 Pa, 60.0000000 K

| Rate constant             | True (fraction)        | Effective (fraction)   |
|---------------------------|------------------------|------------------------|
| Total                     | 6.93738e-17 (1.00 )    | 6.93738e-17 (1.00 )    |
| Formation of rad19        | 6.93738e-17 (1.000 )   | 6.93738e-17 (1.000 )   |
| H-abstraction to cyc2enyl | 2.50609e-31 (3.61e-15) | 2.50609e-31 (3.61e-15) |
| H-abstraction to cyclenyl | 7.62015e-44 (1.10e-27) | 7.62015e-44 (1.10e-27) |

| species                       | PYtrue      | Cumul    | PYeffective | Cumul    |
|-------------------------------|-------------|----------|-------------|----------|
| Indene+H                      | 0.999758    | 0.999758 | 0.999758    | 0.999758 |
| PhCHCCH2+H                    | 0.000230120 | 0.999988 | 0.000230120 | 0.999988 |
| PhCCH+CH3                     | 3.99425e-06 | 0.999992 | 3.99425e-06 | 0.999992 |
| C2H2+PhCH2                    | 2.86792e-06 | 0.999995 | 2.86792e-06 | 0.999995 |
| PhCCCH3+H                     | 2.25805e-06 | 0.999997 | 2.25805e-06 | 0.999997 |
| Ph+MeAc                       | 1.69157e-06 | 0.999999 | 1.69157e-06 | 0.999999 |
| rad67                         | 5.11097e-07 | 0.999999 | 5.11097e-07 | 0.999999 |
| rad35                         | 2.25633e-07 | 1.000000 | 2.25633e-07 | 1.000000 |
| Ph+Allene                     | 1.50520e-07 | 1.000000 | 1.50520e-07 | 1.000000 |
| PAH7+H                        | 1.96315e-08 | 1.000000 | 1.96315e-08 | 1.000000 |
| PhCH2CCH+H                    | 1.86137e-08 | 1.000000 | 1.86137e-08 | 1.000000 |
| rad39                         | 5.53787e-09 | 1.000000 | 5.53787e-09 | 1.000000 |
| rad37                         | 5.12223e-09 | 1.000000 | 5.12223e-09 | 1.000000 |
| rad30                         | 4.22416e-09 | 1.000000 | 4.22416e-09 | 1.000000 |
| PAH9+H                        | 2.80727e-10 | 1.000000 | 2.80727e-10 | 1.000000 |
| rad38                         | 1.19301e-10 | 1.000000 | 1.19301e-10 | 1.000000 |
| rad60syn                      | 1.88683e-11 | 1.000000 | 1.88683e-11 | 1.000000 |
| rad60anti                     | 9.23584e-12 | 1.000000 | 9.23584e-12 | 1.000000 |
| PAH3+H                        | 7.77799e-12 | 1.000000 | 7.77799e-12 | 1.000000 |
| rad46                         | 7.22867e-12 | 1.000000 | 7.22867e-12 | 1.000000 |
| PAH10+CH3                     | 6.79605e-12 | 1.000000 | 6.79605e-12 | 1.000000 |
| rad59                         | 1.60492e-12 | 1.000000 | 1.60492e-12 | 1.000000 |
| PhcycC3H3_A+H                 | 6.95713e-13 | 1.000000 | 6.95713e-13 | 1.000000 |
| rad43                         | 3.11024e-13 | 1.000000 | 3.11024e-13 | 1.000000 |
| rad54                         | 2.52146e-13 | 1.000000 | 2.52146e-13 | 1.000000 |
| rad62                         | 6.70676e-14 | 1.000000 | 6.70676e-14 | 1.000000 |
| rad50                         | 5.01842e-14 | 1.000000 | 5.01842e-14 | 1.000000 |
| rad70                         | 4.09983e-15 | 1.000000 | 4.09983e-15 | 1.000000 |
| Benzene+cycloprop-2-enylidene | 3.61245e-15 | 1.000000 | 3.61245e-15 | 1.000000 |
| rad55                         | 1.80488e-15 | 1.000000 | 1.80488e-15 | 1.000000 |
| PAH1+H                        | 8.09447e-16 | 1.000000 | 8.09447e-16 | 1.000000 |
| Phenyl+cycC3H4                | 4.45921e-16 | 1.000000 | 0.000000    | 1.000000 |
| rad52                         | 3.30397e-16 | 1.000000 | 3.30397e-16 | 1.000000 |
| rad58                         | 1.00586e-16 | 1.000000 | 1.00586e-16 | 1.000000 |
| rad51                         | 8.41359e-17 | 1.000000 | 8.41359e-17 | 1.000000 |
| rad34                         | 4.27536e-17 | 1.000000 | 4.27536e-17 | 1.000000 |

|                               |             |          |             |          |
|-------------------------------|-------------|----------|-------------|----------|
| rad41                         | 4.87016e-18 | 1.000000 | 4.87016e-18 | 1.000000 |
| rad42                         | 4.76358e-18 | 1.000000 | 4.76358e-18 | 1.000000 |
| rad65                         | 1.69553e-18 | 1.000000 | 1.69553e-18 | 1.000000 |
| PhcycC3H3_B+H                 | 1.47018e-20 | 1.000000 | 1.47018e-20 | 1.000000 |
| rad6                          | 7.64165e-23 | 1.000000 | 7.64165e-23 | 1.000000 |
| rad53                         | 3.74000e-25 | 1.000000 | 3.74000e-25 | 1.000000 |
| rad28                         | 8.89991e-26 | 1.000000 | 8.89991e-26 | 1.000000 |
| rad2                          | 3.52619e-26 | 1.000000 | 3.52619e-26 | 1.000000 |
| rad26                         | 1.24098e-26 | 1.000000 | 1.24098e-26 | 1.000000 |
| rad7                          | 5.58408e-27 | 1.000000 | 5.58408e-27 | 1.000000 |
| rad1                          | 2.23917e-27 | 1.000000 | 2.23917e-27 | 1.000000 |
| rad10                         | 1.78388e-27 | 1.000000 | 1.78388e-27 | 1.000000 |
| rad11                         | 1.37563e-27 | 1.000000 | 1.37563e-27 | 1.000000 |
| Benzene+cycloprop-1-enylidene | 1.09842e-27 | 1.000000 | 1.09842e-27 | 1.000000 |
| rad64                         | 9.26943e-28 | 1.000000 | 9.26943e-28 | 1.000000 |
| rad3                          | 2.21348e-28 | 1.000000 | 2.21348e-28 | 1.000000 |
| rad4                          | 1.11922e-28 | 1.000000 | 1.11922e-28 | 1.000000 |
| rad13                         | 3.05871e-29 | 1.000000 | 3.05871e-29 | 1.000000 |
| rad47                         | 1.12650e-29 | 1.000000 | 1.12650e-29 | 1.000000 |
| rad9                          | 4.27614e-31 | 1.000000 | 4.27614e-31 | 1.000000 |
| rad33                         | 5.75380e-32 | 1.000000 | 5.75380e-32 | 1.000000 |
| rad14                         | 3.85511e-32 | 1.000000 | 3.85511e-32 | 1.000000 |
| rad25                         | 2.47949e-32 | 1.000000 | 2.47949e-32 | 1.000000 |
| rad27                         | 2.30950e-32 | 1.000000 | 2.30950e-32 | 1.000000 |
| rad19anti                     | 8.80162e-34 | 1.000000 | 8.80162e-34 | 1.000000 |
| rad5                          | 2.87431e-34 | 1.000000 | 2.87431e-34 | 1.000000 |
| rad15                         | 1.85319e-34 | 1.000000 | 1.85319e-34 | 1.000000 |
| rad61                         | 4.94825e-35 | 1.000000 | 4.94825e-35 | 1.000000 |
| rad23                         | 1.90127e-36 | 1.000000 | 1.90127e-36 | 1.000000 |
| rad31                         | 7.04786e-37 | 1.000000 | 7.04786e-37 | 1.000000 |
| rad20                         | 1.50802e-37 | 1.000000 | 1.50802e-37 | 1.000000 |
| rad21                         | 1.11337e-37 | 1.000000 | 1.11337e-37 | 1.000000 |
| rad45                         | 1.42556e-38 | 1.000000 | 1.42556e-38 | 1.000000 |
| rad56                         | 6.12709e-39 | 1.000000 | 6.12709e-39 | 1.000000 |
| rad22                         | 3.38129e-39 | 1.000000 | 3.38129e-39 | 1.000000 |
| rad12                         | 2.02967e-39 | 1.000000 | 2.02967e-39 | 1.000000 |
| rad36                         | 8.73183e-40 | 1.000000 | 8.73183e-40 | 1.000000 |
| rad18                         | 6.39446e-40 | 1.000000 | 6.39446e-40 | 1.000000 |
| rad68syn                      | 4.99134e-41 | 1.000000 | 4.99134e-41 | 1.000000 |
| rad68anti                     | 4.26086e-41 | 1.000000 | 4.26086e-41 | 1.000000 |
| rad19syn                      | 1.80508e-43 | 1.000000 | 1.80508e-43 | 1.000000 |
| rad24                         | 4.29341e-45 | 1.000000 | 4.29341e-45 | 1.000000 |
| rad73                         | 5.39004e-49 | 1.000000 | 5.39004e-49 | 1.000000 |
| rad40syn                      | 1.54638e-49 | 1.000000 | 1.54638e-49 | 1.000000 |
| rad40anti                     | 1.27059e-49 | 1.000000 | 1.27059e-49 | 1.000000 |
| PAH8+H                        | 7.80796e-54 | 1.000000 | 7.80796e-54 | 1.000000 |
| rad71                         | 1.56746e-57 | 1.000000 | 1.56746e-57 | 1.000000 |
| rad8                          | 9.43643e-64 | 1.000000 | 9.43643e-64 | 1.000000 |

0.100000000E-03 Pa, 70.000000 K

| Rate constant             | True (fraction)        | Effective (fraction)   |
|---------------------------|------------------------|------------------------|
| Total                     | 1.91520e-16 (1.00 )    | 1.91520e-16 (1.00 )    |
| Formation of rad19        | 1.91520e-16 (1.000 )   | 1.91520e-16 (1.000 )   |
| H-abstraction to cyc2enyl | 1.01125e-28 (5.28e-13) | 1.01125e-28 (5.28e-13) |
| H-abstraction to cyclenyl | 1.97822e-39 (1.03e-23) | 1.97822e-39 (1.03e-23) |

| species    | PYtrue      | Cumul    | PYeffective | Cumul    |
|------------|-------------|----------|-------------|----------|
| Indene+H   | 0.999753    | 0.999753 | 0.999753    | 0.999753 |
| PhCHCCH2+H | 0.000235006 | 0.999988 | 0.000235006 | 0.999988 |
| PhCCH+CH3  | 4.08657e-06 | 0.999992 | 4.08657e-06 | 0.999992 |
| C2H2+PhCH2 | 2.94718e-06 | 0.999995 | 2.94718e-06 | 0.999995 |
| PhCCCH3+H  | 2.31532e-06 | 0.999997 | 2.31532e-06 | 0.999997 |
| Ph+MeAc    | 1.74394e-06 | 0.999999 | 1.74394e-06 | 0.999999 |
| rad67      | 5.26089e-07 | 1.000000 | 5.26089e-07 | 1.000000 |
| rad35      | 2.31978e-07 | 1.000000 | 2.31978e-07 | 1.000000 |
| Ph+Allene  | 1.56772e-07 | 1.000000 | 1.56772e-07 | 1.000000 |
| PAH7+H     | 2.03295e-08 | 1.000000 | 2.03295e-08 | 1.000000 |
| PhCH2CCH+H | 1.95128e-08 | 1.000000 | 1.95128e-08 | 1.000000 |
| rad39      | 5.73531e-09 | 1.000000 | 5.73531e-09 | 1.000000 |
| rad37      | 5.31555e-09 | 1.000000 | 5.31555e-09 | 1.000000 |
| rad30      | 4.34560e-09 | 1.000000 | 4.34560e-09 | 1.000000 |
| PAH9+H     | 2.91192e-10 | 1.000000 | 2.91192e-10 | 1.000000 |
| rad38      | 1.24174e-10 | 1.000000 | 1.24174e-10 | 1.000000 |
| rad60syn   | 1.96289e-11 | 1.000000 | 1.96289e-11 | 1.000000 |
| rad60anti  | 9.61771e-12 | 1.000000 | 9.61771e-12 | 1.000000 |
| PAH3+H     | 8.20473e-12 | 1.000000 | 8.20473e-12 | 1.000000 |
| rad46      | 7.54674e-12 | 1.000000 | 7.54674e-12 | 1.000000 |

|                               |             |         |             |         |
|-------------------------------|-------------|---------|-------------|---------|
| PAH10+CH3                     | 7.32909e-12 | 1.00000 | 7.32909e-12 | 1.00000 |
| rad59                         | 1.68947e-12 | 1.00000 | 1.68947e-12 | 1.00000 |
| PhcycC3H3_A+H                 | 8.34924e-13 | 1.00000 | 8.34924e-13 | 1.00000 |
| Benzene+cycloprop-2-enylidene | 5.28015e-13 | 1.00000 | 5.28015e-13 | 1.00000 |
| rad43                         | 3.32589e-13 | 1.00000 | 3.32589e-13 | 1.00000 |
| rad54                         | 2.71642e-13 | 1.00000 | 2.71642e-13 | 1.00000 |
| rad62                         | 7.18892e-14 | 1.00000 | 7.18892e-14 | 1.00000 |
| rad50                         | 5.34208e-14 | 1.00000 | 5.34208e-14 | 1.00000 |
| rad70                         | 4.51972e-15 | 1.00000 | 4.51972e-15 | 1.00000 |
| rad55                         | 1.99154e-15 | 1.00000 | 1.99154e-15 | 1.00000 |
| PAH1+H                        | 9.26787e-16 | 1.00000 | 9.26787e-16 | 1.00000 |
| Phenyl+cycC3H4                | 7.87809e-16 | 1.00000 | 0.00000     | 1.00000 |
| rad52                         | 3.56941e-16 | 1.00000 | 3.56941e-16 | 1.00000 |
| rad58                         | 1.11990e-16 | 1.00000 | 1.11990e-16 | 1.00000 |
| rad51                         | 9.25495e-17 | 1.00000 | 9.25495e-17 | 1.00000 |
| rad34                         | 4.90619e-17 | 1.00000 | 4.90619e-17 | 1.00000 |
| rad41                         | 5.95412e-18 | 1.00000 | 5.95412e-18 | 1.00000 |
| rad42                         | 5.64254e-18 | 1.00000 | 5.64254e-18 | 1.00000 |
| rad65                         | 1.88219e-18 | 1.00000 | 1.88219e-18 | 1.00000 |
| PhcycC3H3_B+H                 | 2.38334e-19 | 1.00000 | 2.38334e-19 | 1.00000 |
| rad6                          | 3.77857e-23 | 1.00000 | 3.77857e-23 | 1.00000 |
| Benzene+cycloprop-1-enylidene | 1.03290e-23 | 1.00000 | 1.03290e-23 | 1.00000 |
| rad53                         | 5.57161e-24 | 1.00000 | 5.57161e-24 | 1.00000 |
| rad28                         | 4.58383e-26 | 1.00000 | 4.58383e-26 | 1.00000 |
| rad64                         | 3.39789e-26 | 1.00000 | 3.39789e-26 | 1.00000 |
| rad2                          | 1.71923e-26 | 1.00000 | 1.71923e-26 | 1.00000 |
| rad26                         | 6.72589e-27 | 1.00000 | 6.72589e-27 | 1.00000 |
| rad7                          | 2.75937e-27 | 1.00000 | 2.75937e-27 | 1.00000 |
| rad1                          | 1.09429e-27 | 1.00000 | 1.09429e-27 | 1.00000 |
| rad10                         | 8.70231e-28 | 1.00000 | 8.70231e-28 | 1.00000 |
| rad11                         | 6.79561e-28 | 1.00000 | 6.79561e-28 | 1.00000 |
| rad3                          | 1.08002e-28 | 1.00000 | 1.08002e-28 | 1.00000 |
| rad4                          | 5.46382e-29 | 1.00000 | 5.46382e-29 | 1.00000 |
| rad13                         | 1.51538e-29 | 1.00000 | 1.51538e-29 | 1.00000 |
| rad47                         | 9.65686e-30 | 1.00000 | 9.65686e-30 | 1.00000 |
| rad9                          | 2.77767e-31 | 1.00000 | 2.77767e-31 | 1.00000 |
| rad61                         | 5.68534e-32 | 1.00000 | 5.68534e-32 | 1.00000 |
| rad33                         | 2.85287e-32 | 1.00000 | 2.85287e-32 | 1.00000 |
| rad14                         | 2.11678e-32 | 1.00000 | 2.11678e-32 | 1.00000 |
| rad25                         | 1.32884e-32 | 1.00000 | 1.32884e-32 | 1.00000 |
| rad27                         | 1.16107e-32 | 1.00000 | 1.16107e-32 | 1.00000 |
| rad19anti                     | 1.15013e-33 | 1.00000 | 1.15013e-33 | 1.00000 |
| rad5                          | 1.96284e-34 | 1.00000 | 1.96284e-34 | 1.00000 |
| rad15                         | 1.20524e-34 | 1.00000 | 1.20524e-34 | 1.00000 |
| rad56                         | 2.33654e-35 | 1.00000 | 2.33654e-35 | 1.00000 |
| rad23                         | 6.74972e-37 | 1.00000 | 6.74972e-37 | 1.00000 |
| rad31                         | 3.80631e-37 | 1.00000 | 3.80631e-37 | 1.00000 |
| rad20                         | 7.78899e-38 | 1.00000 | 7.78899e-38 | 1.00000 |
| rad21                         | 5.75930e-38 | 1.00000 | 5.75930e-38 | 1.00000 |
| rad45                         | 4.99787e-39 | 1.00000 | 4.99787e-39 | 1.00000 |
| rad22                         | 1.38879e-39 | 1.00000 | 1.38879e-39 | 1.00000 |
| rad12                         | 1.32511e-39 | 1.00000 | 1.32511e-39 | 1.00000 |
| rad68syn                      | 8.36377e-40 | 1.00000 | 8.36377e-40 | 1.00000 |
| rad68anti                     | 7.13431e-40 | 1.00000 | 7.13431e-40 | 1.00000 |
| rad18                         | 3.29983e-40 | 1.00000 | 3.29983e-40 | 1.00000 |
| rad36                         | 3.06032e-40 | 1.00000 | 3.06032e-40 | 1.00000 |
| rad19syn                      | 3.07655e-43 | 1.00000 | 3.07655e-43 | 1.00000 |
| rad24                         | 2.38567e-45 | 1.00000 | 2.38567e-45 | 1.00000 |
| rad73                         | 9.70724e-48 | 1.00000 | 9.70724e-48 | 1.00000 |
| rad40syn                      | 2.86303e-48 | 1.00000 | 2.86303e-48 | 1.00000 |
| rad40anti                     | 2.34614e-48 | 1.00000 | 2.34614e-48 | 1.00000 |
| PAH8+H                        | 1.67153e-52 | 1.00000 | 1.67153e-52 | 1.00000 |
| rad71                         | 3.36021e-56 | 1.00000 | 3.36021e-56 | 1.00000 |
| rad8                          | 1.06802e-63 | 1.00000 | 1.06802e-63 | 1.00000 |

0.100000000E-03 Pa, 80.0000000 K

| Rate constant             | True (fraction)        | Effective (fraction)   |
|---------------------------|------------------------|------------------------|
| Total                     | 4.17084e-16 (1.00 )    | 4.17084e-16 (1.00 )    |
| Formation of rad19        | 4.17084e-16 (1.000 )   | 4.17084e-16 (1.000 )   |
| H-abstraction to cyc2enyl | 8.98751e-27 (2.15e-11) | 8.98751e-27 (2.15e-11) |
| H-abstraction to cyclenyl | 4.00120e-36 (9.59e-21) | 4.00120e-36 (9.59e-21) |

| species    | PYtrue      | Cumul    | PYeffective | Cumul    |
|------------|-------------|----------|-------------|----------|
| Indene+H   | 0.999747    | 0.999747 | 0.999747    | 0.999747 |
| PhCHCCH2+H | 0.000240277 | 0.999987 | 0.000240277 | 0.999987 |
| PhCCH+CH3  | 4.18617e-06 | 0.999991 | 4.18617e-06 | 0.999991 |
| C2H2+PhCH2 | 3.03331e-06 | 0.999994 | 3.03331e-06 | 0.999994 |

|                               |             |          |             |          |
|-------------------------------|-------------|----------|-------------|----------|
| PhCCCH3+H                     | 2.37733e-06 | 0.999997 | 2.37733e-06 | 0.999997 |
| Ph+MeAc                       | 1.80101e-06 | 0.999999 | 1.80101e-06 | 0.999999 |
| rad67                         | 5.42407e-07 | 0.999999 | 5.42407e-07 | 0.999999 |
| rad35                         | 2.38874e-07 | 0.999999 | 2.38874e-07 | 0.999999 |
| Ph+Allene                     | 1.63678e-07 | 1.000000 | 1.63678e-07 | 1.000000 |
| PAH7+H                        | 2.10950e-08 | 1.000000 | 2.10950e-08 | 1.000000 |
| PhCH2CCH+H                    | 2.05135e-08 | 1.000000 | 2.05135e-08 | 1.000000 |
| rad39                         | 5.95182e-09 | 1.000000 | 5.95182e-09 | 1.000000 |
| rad37                         | 5.52804e-09 | 1.000000 | 5.52804e-09 | 1.000000 |
| rad30                         | 4.47785e-09 | 1.000000 | 4.47785e-09 | 1.000000 |
| PAH9+H                        | 3.02707e-10 | 1.000000 | 3.02707e-10 | 1.000000 |
| rad38                         | 1.29563e-10 | 1.000000 | 1.29563e-10 | 1.000000 |
| Benzene+cycloprop-2-enylidene | 2.15484e-11 | 1.000000 | 2.15484e-11 | 1.000000 |
| rad60syn                      | 2.04683e-11 | 1.000000 | 2.04683e-11 | 1.000000 |
| rad60anti                     | 1.00396e-11 | 1.000000 | 1.00396e-11 | 1.000000 |
| PAH3+H                        | 8.68351e-12 | 1.000000 | 8.68351e-12 | 1.000000 |
| PAH10+CH3                     | 7.94148e-12 | 1.000000 | 7.94148e-12 | 1.000000 |
| rad46                         | 7.89946e-12 | 1.000000 | 7.89946e-12 | 1.000000 |
| rad59                         | 1.78408e-12 | 1.000000 | 1.78408e-12 | 1.000000 |
| PhcycC3H3_A+H                 | 1.01060e-12 | 1.000000 | 1.01060e-12 | 1.000000 |
| rad43                         | 3.57094e-13 | 1.000000 | 3.57094e-13 | 1.000000 |
| rad54                         | 2.94023e-13 | 1.000000 | 2.94023e-13 | 1.000000 |
| rad62                         | 7.73762e-14 | 1.000000 | 7.73762e-14 | 1.000000 |
| rad50                         | 5.70944e-14 | 1.000000 | 5.70944e-14 | 1.000000 |
| rad70                         | 5.01389e-15 | 1.000000 | 5.01389e-15 | 1.000000 |
| rad55                         | 2.21107e-15 | 1.000000 | 2.21107e-15 | 1.000000 |
| Phenyl+cycC3H4                | 1.32430e-15 | 1.000000 | 0.000000    | 1.000000 |
| PAH1+H                        | 1.07010e-15 | 1.000000 | 1.07010e-15 | 1.000000 |
| rad52                         | 3.87587e-16 | 1.000000 | 3.87587e-16 | 1.000000 |
| rad58                         | 1.25559e-16 | 1.000000 | 1.25559e-16 | 1.000000 |
| rad51                         | 1.02463e-16 | 1.000000 | 1.02463e-16 | 1.000000 |
| rad34                         | 5.67777e-17 | 1.000000 | 5.67777e-17 | 1.000000 |
| rad41                         | 7.33006e-18 | 1.000000 | 7.33006e-18 | 1.000000 |
| rad42                         | 6.74789e-18 | 1.000000 | 6.74789e-18 | 1.000000 |
| rad65                         | 2.10421e-18 | 1.000000 | 2.10421e-18 | 1.000000 |
| PhcycC3H3_B+H                 | 1.96138e-18 | 1.000000 | 1.96138e-18 | 1.000000 |
| Benzene+cycloprop-1-enylidene | 9.59328e-21 | 1.000000 | 9.59328e-21 | 1.000000 |
| rad53                         | 4.18979e-23 | 1.000000 | 4.18979e-23 | 1.000000 |
| rad6                          | 2.10119e-23 | 1.000000 | 2.10119e-23 | 1.000000 |
| rad64                         | 5.09172e-25 | 1.000000 | 5.09172e-25 | 1.000000 |
| rad28                         | 2.64445e-26 | 1.000000 | 2.64445e-26 | 1.000000 |
| rad2                          | 9.45563e-27 | 1.000000 | 9.45563e-27 | 1.000000 |
| rad26                         | 4.08593e-27 | 1.000000 | 4.08593e-27 | 1.000000 |
| rad7                          | 1.53439e-27 | 1.000000 | 1.53439e-27 | 1.000000 |
| rad1                          | 6.03438e-28 | 1.000000 | 6.03438e-28 | 1.000000 |
| rad10                         | 4.79052e-28 | 1.000000 | 4.79052e-28 | 1.000000 |
| rad11                         | 3.77815e-28 | 1.000000 | 3.77815e-28 | 1.000000 |
| rad3                          | 5.94485e-29 | 1.000000 | 5.94485e-29 | 1.000000 |
| rad4                          | 3.00933e-29 | 1.000000 | 3.00933e-29 | 1.000000 |
| rad47                         | 8.55018e-30 | 1.000000 | 8.55018e-30 | 1.000000 |
| rad13                         | 8.44474e-30 | 1.000000 | 8.44474e-30 | 1.000000 |
| rad61                         | 8.41974e-30 | 1.000000 | 8.41974e-30 | 1.000000 |
| rad9                          | 2.03559e-31 | 1.000000 | 2.03559e-31 | 1.000000 |
| rad33                         | 1.59121e-32 | 1.000000 | 1.59121e-32 | 1.000000 |
| rad14                         | 1.33132e-32 | 1.000000 | 1.33132e-32 | 1.000000 |
| rad56                         | 1.31899e-32 | 1.000000 | 1.31899e-32 | 1.000000 |
| rad25                         | 8.15053e-33 | 1.000000 | 8.15053e-33 | 1.000000 |
| rad27                         | 6.61525e-33 | 1.000000 | 6.61525e-33 | 1.000000 |
| rad19anti                     | 1.65214e-33 | 1.000000 | 1.65214e-33 | 1.000000 |
| rad68syn                      | 1.87176e-34 | 1.000000 | 1.87176e-34 | 1.000000 |
| rad68anti                     | 1.57634e-34 | 1.000000 | 1.57634e-34 | 1.000000 |
| rad5                          | 1.43303e-34 | 1.000000 | 1.43303e-34 | 1.000000 |
| rad15                         | 8.84408e-35 | 1.000000 | 8.84408e-35 | 1.000000 |
| rad23                         | 2.89157e-37 | 1.000000 | 2.89157e-37 | 1.000000 |
| rad31                         | 2.52060e-37 | 1.000000 | 2.52060e-37 | 1.000000 |
| rad20                         | 4.54443e-38 | 1.000000 | 4.54443e-38 | 1.000000 |
| rad21                         | 3.36596e-38 | 1.000000 | 3.36596e-38 | 1.000000 |
| rad45                         | 2.11973e-39 | 1.000000 | 2.11973e-39 | 1.000000 |
| rad12                         | 9.76688e-40 | 1.000000 | 9.76688e-40 | 1.000000 |
| rad22                         | 6.73221e-40 | 1.000000 | 6.73221e-40 | 1.000000 |
| rad18                         | 1.92687e-40 | 1.000000 | 1.92687e-40 | 1.000000 |
| rad36                         | 1.29771e-40 | 1.000000 | 1.29771e-40 | 1.000000 |
| rad19syn                      | 5.56519e-43 | 1.000000 | 5.56519e-43 | 1.000000 |
| rad24                         | 1.56122e-45 | 1.000000 | 1.56122e-45 | 1.000000 |
| rad73                         | 1.03598e-45 | 1.000000 | 1.03598e-45 | 1.000000 |
| rad40syn                      | 2.29100e-46 | 1.000000 | 2.29100e-46 | 1.000000 |
| rad40anti                     | 1.86951e-46 | 1.000000 | 1.86951e-46 | 1.000000 |
| PAH8+H                        | 1.56175e-50 | 1.000000 | 1.56175e-50 | 1.000000 |
| rad71                         | 3.88725e-54 | 1.000000 | 3.88725e-54 | 1.000000 |
| rad8                          | 1.28444e-63 | 1.000000 | 1.28444e-63 | 1.000000 |

0.100000000E-03 Pa, 90.000000 K

=====

| Rate constant             | True (fraction)        | Effective (fraction)   |
|---------------------------|------------------------|------------------------|
| Total                     | 7.74016e-16 (1.00 )    | 7.74016e-16 (1.00 )    |
| Formation of rad19        | 7.74016e-16 (1.000 )   | 7.74016e-16 (1.000 )   |
| H-abstraction to cyc2enyl | 2.91736e-25 (3.77e-10) | 2.91736e-25 (3.77e-10) |
| H-abstraction to cyclenyl | 1.47814e-33 (1.91e-18) | 1.47814e-33 (1.91e-18) |

| species                       | PYtrue      | Cumul     | PYeffective | Cumul     |
|-------------------------------|-------------|-----------|-------------|-----------|
| Indene+H                      | 0.9999741   | 0.9999741 | 0.9999741   | 0.9999741 |
| PhCHCCH2+H                    | 0.000245933 | 0.999987  | 0.000245933 | 0.999987  |
| PhCCH+CH3                     | 4.29300e-06 | 0.999991  | 4.29300e-06 | 0.999991  |
| C2H2+PhCH2                    | 3.12641e-06 | 0.999994  | 3.12641e-06 | 0.999994  |
| PhCCCH3+H                     | 2.44411e-06 | 0.999997  | 2.44411e-06 | 0.999997  |
| Ph+MeAc                       | 1.86289e-06 | 0.999999  | 1.86289e-06 | 0.999999  |
| rad67                         | 5.60077e-07 | 0.999999  | 5.60077e-07 | 0.999999  |
| rad35                         | 2.46331e-07 | 0.999999  | 2.46331e-07 | 0.999999  |
| Ph+Allene                     | 1.71273e-07 | 1.000000  | 1.71273e-07 | 1.000000  |
| PAH7+H                        | 2.19307e-08 | 1.000000  | 2.19307e-08 | 1.000000  |
| PhCH2CCH+H                    | 2.16229e-08 | 1.000000  | 2.16229e-08 | 1.000000  |
| rad39                         | 6.18811e-09 | 1.000000  | 6.18811e-09 | 1.000000  |
| rad37                         | 5.76055e-09 | 1.000000  | 5.76055e-09 | 1.000000  |
| rad30                         | 4.62111e-09 | 1.000000  | 4.62111e-09 | 1.000000  |
| Benzene+cycloprop-2-enylidene | 3.76912e-10 | 1.000000  | 3.76912e-10 | 1.000000  |
| PAH9+H                        | 3.15321e-10 | 1.000000  | 3.15321e-10 | 1.000000  |
| rad38                         | 1.35498e-10 | 1.000000  | 1.35498e-10 | 1.000000  |
| rad60syn                      | 2.13908e-11 | 1.000000  | 2.13908e-11 | 1.000000  |
| rad60anti                     | 1.05039e-11 | 1.000000  | 1.05039e-11 | 1.000000  |
| PAH3+H                        | 9.21895e-12 | 1.000000  | 9.21895e-12 | 1.000000  |
| PAH10+CH3                     | 8.64378e-12 | 1.000000  | 8.64378e-12 | 1.000000  |
| rad46                         | 8.28910e-12 | 1.000000  | 8.28910e-12 | 1.000000  |
| rad59                         | 1.88960e-12 | 1.000000  | 1.88960e-12 | 1.000000  |
| PhcycC3H3_A+H                 | 1.23243e-12 | 1.000000  | 1.23243e-12 | 1.000000  |
| rad43                         | 3.84865e-13 | 1.000000  | 3.84865e-13 | 1.000000  |
| rad54                         | 3.19669e-13 | 1.000000  | 3.19669e-13 | 1.000000  |
| rad62                         | 8.36038e-14 | 1.000000  | 8.36038e-14 | 1.000000  |
| rad50                         | 6.12544e-14 | 1.000000  | 6.12544e-14 | 1.000000  |
| rad70                         | 5.59526e-15 | 1.000000  | 5.59526e-15 | 1.000000  |
| rad55                         | 2.46927e-15 | 1.000000  | 2.46927e-15 | 1.000000  |
| Phenyl+cycC3H4                | 2.14284e-15 | 1.000000  | 0.000000    | 1.000000  |
| PAH1+H                        | 1.24546e-15 | 1.000000  | 1.24546e-15 | 1.000000  |
| rad52                         | 4.22929e-16 | 1.000000  | 4.22929e-16 | 1.000000  |
| rad58                         | 1.41712e-16 | 1.000000  | 1.41712e-16 | 1.000000  |
| rad51                         | 1.14146e-16 | 1.000000  | 1.14146e-16 | 1.000000  |
| rad34                         | 6.62414e-17 | 1.000000  | 6.62414e-17 | 1.000000  |
| PhcycC3H3_B+H                 | 1.04002e-17 | 1.000000  | 1.04002e-17 | 1.000000  |
| rad41                         | 9.07974e-18 | 1.000000  | 9.07974e-18 | 1.000000  |
| rad42                         | 8.13553e-18 | 1.000000  | 8.13553e-18 | 1.000000  |
| rad65                         | 2.36850e-18 | 1.000000  | 2.36850e-18 | 1.000000  |
| Benzene+cycloprop-1-enylidene | 1.90970e-18 | 1.000000  | 1.90970e-18 | 1.000000  |
| rad53                         | 2.02289e-22 | 1.000000  | 2.02289e-22 | 1.000000  |
| rad6                          | 1.27162e-23 | 1.000000  | 1.27162e-23 | 1.000000  |
| rad64                         | 4.24437e-24 | 1.000000  | 4.24437e-24 | 1.000000  |
| rad28                         | 1.65482e-26 | 1.000000  | 1.65482e-26 | 1.000000  |
| rad2                          | 5.67349e-27 | 1.000000  | 5.67349e-27 | 1.000000  |
| rad26                         | 2.69249e-27 | 1.000000  | 2.69249e-27 | 1.000000  |
| rad7                          | 9.28966e-28 | 1.000000  | 9.28966e-28 | 1.000000  |
| rad61                         | 4.05750e-28 | 1.000000  | 4.05750e-28 | 1.000000  |
| rad1                          | 3.63132e-28 | 1.000000  | 3.63132e-28 | 1.000000  |
| rad10                         | 2.87765e-28 | 1.000000  | 2.87765e-28 | 1.000000  |
| rad11                         | 2.28722e-28 | 1.000000  | 2.28722e-28 | 1.000000  |
| rad3                          | 3.56966e-29 | 1.000000  | 3.56966e-29 | 1.000000  |
| rad4                          | 1.80825e-29 | 1.000000  | 1.80825e-29 | 1.000000  |
| rad47                         | 7.76048e-30 | 1.000000  | 7.76048e-30 | 1.000000  |
| rad13                         | 5.12245e-30 | 1.000000  | 5.12245e-30 | 1.000000  |
| rad56                         | 1.28607e-30 | 1.000000  | 1.28607e-30 | 1.000000  |
| rad9                          | 1.63158e-31 | 1.000000  | 1.63158e-31 | 1.000000  |
| rad68syn                      | 2.85414e-32 | 1.000000  | 2.85414e-32 | 1.000000  |
| rad68anti                     | 2.36888e-32 | 1.000000  | 2.36888e-32 | 1.000000  |
| rad33                         | 9.66118e-33 | 1.000000  | 9.66118e-33 | 1.000000  |
| rad14                         | 9.26076e-33 | 1.000000  | 9.26076e-33 | 1.000000  |
| rad25                         | 5.53472e-33 | 1.000000  | 5.53472e-33 | 1.000000  |
| rad27                         | 4.13667e-33 | 1.000000  | 4.13667e-33 | 1.000000  |
| rad19anti                     | 2.57325e-33 | 1.000000  | 2.57325e-33 | 1.000000  |
| rad5                          | 1.09784e-34 | 1.000000  | 1.09784e-34 | 1.000000  |
| rad15                         | 7.09864e-35 | 1.000000  | 7.09864e-35 | 1.000000  |
| rad31                         | 2.06742e-37 | 1.000000  | 2.06742e-37 | 1.000000  |



|           |             |          |             |          |
|-----------|-------------|----------|-------------|----------|
| rad23     | 1.41903e-37 | 1.000000 | 1.41903e-37 | 1.000000 |
| rad20     | 2.89681e-38 | 1.000000 | 2.89681e-38 | 1.000000 |
| rad21     | 2.14971e-38 | 1.000000 | 2.14971e-38 | 1.000000 |
| rad73     | 1.45351e-39 | 1.000000 | 1.45351e-39 | 1.000000 |
| rad45     | 1.03171e-39 | 1.000000 | 1.03171e-39 | 1.000000 |
| rad12     | 7.87876e-40 | 1.000000 | 7.87876e-40 | 1.000000 |
| rad22     | 3.67405e-40 | 1.000000 | 3.67405e-40 | 1.000000 |
| rad18     | 1.23065e-40 | 1.000000 | 1.23065e-40 | 1.000000 |
| rad36     | 6.31596e-41 | 1.000000 | 6.31596e-41 | 1.000000 |
| rad19syn  | 1.05530e-42 | 1.000000 | 1.05530e-42 | 1.000000 |
| rad40syn  | 5.28619e-44 | 1.000000 | 5.28619e-44 | 1.000000 |
| rad40anti | 4.29354e-44 | 1.000000 | 4.29354e-44 | 1.000000 |
| rad24     | 1.16380e-45 | 1.000000 | 1.16380e-45 | 1.000000 |
| PAH8+H    | 4.16117e-48 | 1.000000 | 4.16117e-48 | 1.000000 |
| rad71     | 1.29311e-51 | 1.000000 | 1.29311e-51 | 1.000000 |
| rad8      | 1.61995e-63 | 1.000000 | 1.61995e-63 | 1.000000 |

0.100000000E-03 Pa, 100.000000 K

=====

| Rate constant             | True (fraction)        | Effective (fraction)   |
|---------------------------|------------------------|------------------------|
| Total                     | 1.28255e-15 (1.00 )    | 1.28255e-15 (1.00 )    |
| Formation of rad19        | 1.28255e-15 (1.000 )   | 1.28255e-15 (1.000 )   |
| H-abstraction to cyc2enyl | 4.68359e-24 (3.65e-09) | 4.68359e-24 (3.65e-09) |
| H-abstraction to cyclenyl | 1.66242e-31 (1.30e-16) | 1.66242e-31 (1.30e-16) |

| species                       | PYtrue      | Cumul    | PYeffective | Cumul    |
|-------------------------------|-------------|----------|-------------|----------|
| Indene+H                      | 0.999735    | 0.999735 | 0.999735    | 0.999735 |
| PhCHCCH2+H                    | 0.000251988 | 0.999987 | 0.000251988 | 0.999987 |
| PhCCH+CH3                     | 4.40735e-06 | 0.999991 | 4.40735e-06 | 0.999991 |
| C2H2+PhCH2                    | 3.22687e-06 | 0.999995 | 3.22687e-06 | 0.999995 |
| PhCCCH3+H                     | 2.51588e-06 | 0.999997 | 2.51588e-06 | 0.999997 |
| Ph+MeAc                       | 1.92987e-06 | 0.999999 | 1.92987e-06 | 0.999999 |
| rad67                         | 5.79180e-07 | 1.000000 | 5.79180e-07 | 1.000000 |
| rad35                         | 2.54382e-07 | 1.000000 | 2.54382e-07 | 1.000000 |
| Ph+Allene                     | 1.79620e-07 | 1.000000 | 1.79620e-07 | 1.000000 |
| PhCH2CCH+H                    | 2.28527e-08 | 1.000000 | 2.28527e-08 | 1.000000 |
| PAH7+H                        | 2.28419e-08 | 1.000000 | 2.28419e-08 | 1.000000 |
| rad39                         | 6.44570e-09 | 1.000000 | 6.44570e-09 | 1.000000 |
| rad37                         | 6.01469e-09 | 1.000000 | 6.01469e-09 | 1.000000 |
| rad30                         | 4.77609e-09 | 1.000000 | 4.77609e-09 | 1.000000 |
| Benzene+cycloprop-2-enylidene | 3.65179e-09 | 1.000000 | 3.65179e-09 | 1.000000 |
| PAH9+H                        | 3.29126e-10 | 1.000000 | 3.29126e-10 | 1.000000 |
| rad38                         | 1.42030e-10 | 1.000000 | 1.42030e-10 | 1.000000 |
| rad60syn                      | 2.24038e-11 | 1.000000 | 2.24038e-11 | 1.000000 |
| rad60anti                     | 1.10144e-11 | 1.000000 | 1.10144e-11 | 1.000000 |
| PAH3+H                        | 9.81796e-12 | 1.000000 | 9.81796e-12 | 1.000000 |
| PAH10+CH3                     | 9.45053e-12 | 1.000000 | 9.45053e-12 | 1.000000 |
| rad46                         | 8.71936e-12 | 1.000000 | 8.71936e-12 | 1.000000 |
| rad59                         | 2.00729e-12 | 1.000000 | 2.00729e-12 | 1.000000 |
| PhcycC3H3_A+H                 | 1.51348e-12 | 1.000000 | 1.51348e-12 | 1.000000 |
| rad43                         | 4.16365e-13 | 1.000000 | 4.16365e-13 | 1.000000 |
| rad54                         | 3.49108e-13 | 1.000000 | 3.49108e-13 | 1.000000 |
| rad62                         | 9.06772e-14 | 1.000000 | 9.06772e-14 | 1.000000 |
| rad50                         | 6.59710e-14 | 1.000000 | 6.59710e-14 | 1.000000 |
| rad70                         | 6.28136e-15 | 1.000000 | 6.28136e-15 | 1.000000 |
| Phenyl+cycC3H4                | 3.36905e-15 | 1.000000 | 0.000000    | 1.000000 |
| rad55                         | 2.77401e-15 | 1.000000 | 2.77401e-15 | 1.000000 |
| PAH1+H                        | 1.46118e-15 | 1.000000 | 1.46118e-15 | 1.000000 |
| rad52                         | 4.63786e-16 | 1.000000 | 4.63786e-16 | 1.000000 |
| rad58                         | 1.61017e-16 | 1.000000 | 1.61017e-16 | 1.000000 |
| Benzene+cycloprop-1-enylidene | 1.29619e-16 | 1.000000 | 1.29619e-16 | 1.000000 |
| rad51                         | 1.27967e-16 | 1.000000 | 1.27967e-16 | 1.000000 |
| rad34                         | 7.79131e-17 | 1.000000 | 7.79131e-17 | 1.000000 |
| PhcycC3H3_B+H                 | 4.09123e-17 | 1.000000 | 4.09123e-17 | 1.000000 |
| rad41                         | 1.13184e-17 | 1.000000 | 1.13184e-17 | 1.000000 |
| rad42                         | 9.88312e-18 | 1.000000 | 9.88312e-18 | 1.000000 |
| rad65                         | 2.68446e-18 | 1.000000 | 2.68446e-18 | 1.000000 |
| rad53                         | 7.24616e-22 | 1.000000 | 7.24616e-22 | 1.000000 |
| rad64                         | 2.36958e-23 | 1.000000 | 2.36958e-23 | 1.000000 |
| rad6                          | 8.20394e-24 | 1.000000 | 8.20394e-24 | 1.000000 |
| rad28                         | 1.10074e-26 | 1.000000 | 1.10074e-26 | 1.000000 |
| rad61                         | 9.04334e-27 | 1.000000 | 9.04334e-27 | 1.000000 |
| rad2                          | 3.63670e-27 | 1.000000 | 3.63670e-27 | 1.000000 |
| rad26                         | 1.88575e-27 | 1.000000 | 1.88575e-27 | 1.000000 |
| rad7                          | 5.99743e-28 | 1.000000 | 5.99743e-28 | 1.000000 |
| rad1                          | 2.33519e-28 | 1.000000 | 2.33519e-28 | 1.000000 |
| rad10                         | 1.84696e-28 | 1.000000 | 1.84696e-28 | 1.000000 |
| rad11                         | 1.47664e-28 | 1.000000 | 1.47664e-28 | 1.000000 |

|           |             |         |             |         |
|-----------|-------------|---------|-------------|---------|
| rad56     | 5.01134e-29 | 1.00000 | 5.01134e-29 | 1.00000 |
| rad3      | 2.28954e-29 | 1.00000 | 2.28954e-29 | 1.00000 |
| rad4      | 1.16069e-29 | 1.00000 | 1.16069e-29 | 1.00000 |
| rad47     | 7.18710e-30 | 1.00000 | 7.18710e-30 | 1.00000 |
| rad13     | 3.31287e-30 | 1.00000 | 3.31287e-30 | 1.00000 |
| rad68syn  | 1.54810e-30 | 1.00000 | 1.54810e-30 | 1.00000 |
| rad68anti | 1.27120e-30 | 1.00000 | 1.27120e-30 | 1.00000 |
| rad9      | 1.40249e-31 | 1.00000 | 1.40249e-31 | 1.00000 |
| rad14     | 6.95996e-33 | 1.00000 | 6.95996e-33 | 1.00000 |
| rad33     | 6.25460e-33 | 1.00000 | 6.25460e-33 | 1.00000 |
| rad19anti | 4.30756e-33 | 1.00000 | 4.30756e-33 | 1.00000 |
| rad25     | 4.07076e-33 | 1.00000 | 4.07076e-33 | 1.00000 |
| rad27     | 2.78364e-33 | 1.00000 | 2.78364e-33 | 1.00000 |
| rad5      | 8.72095e-35 | 1.00000 | 8.72095e-35 | 1.00000 |
| rad15     | 6.11087e-35 | 1.00000 | 6.11087e-35 | 1.00000 |
| rad40syn  | 1.99129e-36 | 1.00000 | 1.99129e-36 | 1.00000 |
| rad40anti | 1.51572e-36 | 1.00000 | 1.51572e-36 | 1.00000 |
| rad73     | 7.52973e-37 | 1.00000 | 7.52973e-37 | 1.00000 |
| rad31     | 2.11422e-37 | 1.00000 | 2.11422e-37 | 1.00000 |
| rad23     | 7.72351e-38 | 1.00000 | 7.72351e-38 | 1.00000 |
| rad20     | 1.97566e-38 | 1.00000 | 1.97566e-38 | 1.00000 |
| rad21     | 1.46926e-38 | 1.00000 | 1.46926e-38 | 1.00000 |
| rad12     | 6.82086e-40 | 1.00000 | 6.82086e-40 | 1.00000 |
| rad45     | 5.57717e-40 | 1.00000 | 5.57717e-40 | 1.00000 |
| rad22     | 2.19167e-40 | 1.00000 | 2.19167e-40 | 1.00000 |
| rad18     | 8.41550e-41 | 1.00000 | 8.41550e-41 | 1.00000 |
| rad36     | 3.41465e-41 | 1.00000 | 3.41465e-41 | 1.00000 |
| rad19syn  | 2.08907e-42 | 1.00000 | 2.08907e-42 | 1.00000 |
| PAH8+H    | 2.22247e-45 | 1.00000 | 2.22247e-45 | 1.00000 |
| rad24     | 9.69292e-46 | 1.00000 | 9.69292e-46 | 1.00000 |
| rad71     | 8.99691e-49 | 1.00000 | 8.99691e-49 | 1.00000 |
| rad8      | 2.12448e-63 | 1.00000 | 2.12448e-63 | 1.00000 |

0.100000000E-03 Pa, 110.000000 K

=====

| Rate constant             | True (fraction)        | Effective (fraction)   |
|---------------------------|------------------------|------------------------|
| Total                     | 1.95524e-15 (1.00 )    | 1.95524e-15 (1.00 )    |
| Formation of rad19        | 1.95524e-15 (1.000 )   | 1.95524e-15 (1.000 )   |
| H-abstraction to cyc2enyl | 4.50936e-23 (2.31e-08) | 4.50936e-23 (2.31e-08) |
| H-abstraction to cyclenyl | 7.87782e-30 (4.03e-15) | 7.87782e-30 (4.03e-15) |

| species                       | PYtrue      | Cumul    | PYeffective | Cumul    |
|-------------------------------|-------------|----------|-------------|----------|
| Indene+H                      | 0.999728    | 0.999728 | 0.999728    | 0.999728 |
| PhCHCCH2+H                    | 0.000258470 | 0.999986 | 0.000258470 | 0.999986 |
| PhCCH+CH3                     | 4.52971e-06 | 0.999991 | 4.52971e-06 | 0.999991 |
| C2H2+PhCH2                    | 3.33531e-06 | 0.999994 | 3.33531e-06 | 0.999994 |
| PhCCCH3+H                     | 2.59304e-06 | 0.999997 | 2.59304e-06 | 0.999997 |
| Ph+MeAc                       | 2.00241e-06 | 0.999999 | 2.00241e-06 | 0.999999 |
| rad67                         | 5.99841e-07 | 1.000000 | 5.99841e-07 | 1.000000 |
| rad35                         | 2.63076e-07 | 1.000000 | 2.63076e-07 | 1.000000 |
| Ph+Allene                     | 1.88807e-07 | 1.000000 | 1.88807e-07 | 1.000000 |
| PhCH2CCH+H                    | 2.42183e-08 | 1.000000 | 2.42183e-08 | 1.000000 |
| PAH7+H                        | 2.38364e-08 | 1.000000 | 2.38364e-08 | 1.000000 |
| Benzene+cycloprop-2-enylidene | 2.30629e-08 | 1.000000 | 2.30629e-08 | 1.000000 |
| rad39                         | 6.72673e-09 | 1.000000 | 6.72673e-09 | 1.000000 |
| rad37                         | 6.29276e-09 | 1.000000 | 6.29276e-09 | 1.000000 |
| rad30                         | 4.94381e-09 | 1.000000 | 4.94381e-09 | 1.000000 |
| PAH9+H                        | 3.44255e-10 | 1.000000 | 3.44255e-10 | 1.000000 |
| rad38                         | 1.49231e-10 | 1.000000 | 1.49231e-10 | 1.000000 |
| rad60syn                      | 2.35176e-11 | 1.000000 | 2.35176e-11 | 1.000000 |
| rad60anti                     | 1.15765e-11 | 1.000000 | 1.15765e-11 | 1.000000 |
| PAH3+H                        | 1.04897e-11 | 1.000000 | 1.04897e-11 | 1.000000 |
| PAH10+CH3                     | 1.03808e-11 | 1.000000 | 1.03808e-11 | 1.000000 |
| rad46                         | 9.19530e-12 | 1.000000 | 9.19530e-12 | 1.000000 |
| rad59                         | 2.13884e-12 | 1.000000 | 2.13884e-12 | 1.000000 |
| PhcycC3H3_A+H                 | 1.87147e-12 | 1.000000 | 1.87147e-12 | 1.000000 |
| rad43                         | 4.52197e-13 | 1.000000 | 4.52197e-13 | 1.000000 |
| rad54                         | 3.83032e-13 | 1.000000 | 3.83032e-13 | 1.000000 |
| rad62                         | 9.87341e-14 | 1.000000 | 9.87341e-14 | 1.000000 |
| rad50                         | 7.13368e-14 | 1.000000 | 7.13368e-14 | 1.000000 |
| rad70                         | 7.09538e-15 | 1.000000 | 7.09538e-15 | 1.000000 |
| Phenyl+cycC3H4                | 5.18630e-15 | 1.000000 | 0.000000    | 1.000000 |
| Benzene+cycloprop-1-enylidene | 4.02908e-15 | 1.000000 | 4.02908e-15 | 1.000000 |
| rad55                         | 3.13563e-15 | 1.000000 | 3.13563e-15 | 1.000000 |
| PAH1+H                        | 1.72845e-15 | 1.000000 | 1.72845e-15 | 1.000000 |
| rad52                         | 5.11237e-16 | 1.000000 | 5.11237e-16 | 1.000000 |
| rad58                         | 1.84230e-16 | 1.000000 | 1.84230e-16 | 1.000000 |
| rad51                         | 1.44419e-16 | 1.000000 | 1.44419e-16 | 1.000000 |

|               |             |         |             |         |
|---------------|-------------|---------|-------------|---------|
| PhcycC3H3_B+H | 1.30407e-16 | 1.00000 | 1.30407e-16 | 1.00000 |
| rad34         | 9.24149e-17 | 1.00000 | 9.24149e-17 | 1.00000 |
| rad41         | 1.42059e-17 | 1.00000 | 1.42059e-17 | 1.00000 |
| rad42         | 1.20966e-17 | 1.00000 | 1.20966e-17 | 1.00000 |
| rad65         | 3.06466e-18 | 1.00000 | 3.06466e-18 | 1.00000 |
| rad53         | 2.11079e-21 | 1.00000 | 2.11079e-21 | 1.00000 |
| rad64         | 9.96332e-23 | 1.00000 | 9.96332e-23 | 1.00000 |
| rad6          | 5.56528e-24 | 1.00000 | 5.56528e-24 | 1.00000 |
| rad61         | 1.15971e-25 | 1.00000 | 1.15971e-25 | 1.00000 |
| rad28         | 7.67868e-27 | 1.00000 | 7.67868e-27 | 1.00000 |
| rad2          | 2.45612e-27 | 1.00000 | 2.45612e-27 | 1.00000 |
| rad26         | 1.38522e-27 | 1.00000 | 1.38522e-27 | 1.00000 |
| rad56         | 1.00968e-27 | 1.00000 | 1.00968e-27 | 1.00000 |
| rad7          | 4.07220e-28 | 1.00000 | 4.07220e-28 | 1.00000 |
| rad1          | 1.58270e-28 | 1.00000 | 1.58270e-28 | 1.00000 |
| rad10         | 1.24921e-28 | 1.00000 | 1.24921e-28 | 1.00000 |
| rad11         | 1.00268e-28 | 1.00000 | 1.00268e-28 | 1.00000 |
| rad68syn      | 4.04799e-29 | 1.00000 | 4.04799e-29 | 1.00000 |
| rad68anti     | 3.29758e-29 | 1.00000 | 3.29758e-29 | 1.00000 |
| rad3          | 1.54699e-29 | 1.00000 | 1.54699e-29 | 1.00000 |
| rad4          | 7.84940e-30 | 1.00000 | 7.84940e-30 | 1.00000 |
| rad47         | 6.77119e-30 | 1.00000 | 6.77119e-30 | 1.00000 |
| rad13         | 2.25314e-30 | 1.00000 | 2.25314e-30 | 1.00000 |
| rad9          | 1.27607e-31 | 1.00000 | 1.27607e-31 | 1.00000 |
| rad19anti     | 7.70569e-33 | 1.00000 | 7.70569e-33 | 1.00000 |
| rad14         | 5.55840e-33 | 1.00000 | 5.55840e-33 | 1.00000 |
| rad33         | 4.25850e-33 | 1.00000 | 4.25850e-33 | 1.00000 |
| rad25         | 3.19239e-33 | 1.00000 | 3.19239e-33 | 1.00000 |
| rad27         | 1.99041e-33 | 1.00000 | 1.99041e-33 | 1.00000 |
| rad40syn      | 3.23201e-34 | 1.00000 | 3.23201e-34 | 1.00000 |
| rad40anti     | 2.54378e-34 | 1.00000 | 2.54378e-34 | 1.00000 |
| rad5          | 7.12596e-35 | 1.00000 | 7.12596e-35 | 1.00000 |
| rad15         | 5.56861e-35 | 1.00000 | 5.56861e-35 | 1.00000 |
| rad73         | 5.48403e-35 | 1.00000 | 5.48403e-35 | 1.00000 |
| rad31         | 2.63351e-37 | 1.00000 | 2.63351e-37 | 1.00000 |
| rad23         | 4.56662e-38 | 1.00000 | 4.56662e-38 | 1.00000 |
| rad20         | 1.42193e-38 | 1.00000 | 1.42193e-38 | 1.00000 |
| rad21         | 1.06000e-38 | 1.00000 | 1.06000e-38 | 1.00000 |
| rad12         | 6.25519e-40 | 1.00000 | 6.25519e-40 | 1.00000 |
| rad45         | 3.27865e-40 | 1.00000 | 3.27865e-40 | 1.00000 |
| rad22         | 1.40147e-40 | 1.00000 | 1.40147e-40 | 1.00000 |
| rad18         | 6.07539e-41 | 1.00000 | 6.07539e-41 | 1.00000 |
| rad36         | 2.00797e-41 | 1.00000 | 2.00797e-41 | 1.00000 |
| rad19syn      | 4.31564e-42 | 1.00000 | 4.31564e-42 | 1.00000 |
| PAH8+H        | 1.08851e-42 | 1.00000 | 1.08851e-42 | 1.00000 |
| rad24         | 8.89912e-46 | 1.00000 | 8.89912e-46 | 1.00000 |
| rad71         | 5.50115e-46 | 1.00000 | 5.50115e-46 | 1.00000 |
| rad8          | 2.88065e-63 | 1.00000 | 2.88065e-63 | 1.00000 |

0.100000000E-03 Pa, 120.000000 K

| Rate constant             | True (fraction)        | Effective (fraction)   |
|---------------------------|------------------------|------------------------|
| Total                     | 2.79817e-15 (1.00)     | 2.79817e-15 (1.00)     |
| Formation of rad19        | 2.79817e-15 (1.000)    | 2.79817e-15 (1.000)    |
| H-abstraction to cyc2enyl | 2.96039e-22 (1.06e-07) | 2.96039e-22 (1.06e-07) |
| H-abstraction to cyclenyl | 1.95323e-28 (6.98e-14) | 1.95323e-28 (6.98e-14) |

| species                       | PYtrue      | Cumul    | PYeffective | Cumul    |
|-------------------------------|-------------|----------|-------------|----------|
| Indene+H                      | 0.999721    | 0.999721 | 0.999721    | 0.999721 |
| PhCHCCH2+H                    | 0.000265418 | 0.999986 | 0.000265418 | 0.999986 |
| PhCCH+CH3                     | 4.66081e-06 | 0.999991 | 4.66081e-06 | 0.999991 |
| C2H2+PhCH2                    | 3.45255e-06 | 0.999994 | 3.45255e-06 | 0.999994 |
| PhCCCH3+H                     | 2.67609e-06 | 0.999997 | 2.67609e-06 | 0.999997 |
| Ph+MeAc                       | 2.08110e-06 | 0.999999 | 2.08110e-06 | 0.999999 |
| rad67                         | 6.22225e-07 | 1.000000 | 6.22225e-07 | 1.000000 |
| rad35                         | 2.72481e-07 | 1.000000 | 2.72481e-07 | 1.000000 |
| Ph+Allene                     | 1.98945e-07 | 1.000000 | 1.98945e-07 | 1.000000 |
| Benzene+cycloprop-2-enylidene | 1.05797e-07 | 1.000000 | 1.05797e-07 | 1.000000 |
| PhCH2CCH+H                    | 2.57398e-08 | 1.000000 | 2.57398e-08 | 1.000000 |
| PAH7+H                        | 2.49241e-08 | 1.000000 | 2.49241e-08 | 1.000000 |
| rad39                         | 7.03402e-09 | 1.000000 | 7.03402e-09 | 1.000000 |
| rad37                         | 6.59772e-09 | 1.000000 | 6.59772e-09 | 1.000000 |
| rad30                         | 5.12565e-09 | 1.000000 | 5.12565e-09 | 1.000000 |
| PAH9+H                        | 3.60876e-10 | 1.000000 | 3.60876e-10 | 1.000000 |
| rad38                         | 1.57193e-10 | 1.000000 | 1.57193e-10 | 1.000000 |
| rad60syn                      | 2.47457e-11 | 1.000000 | 2.47457e-11 | 1.000000 |
| rad60anti                     | 1.21971e-11 | 1.000000 | 1.21971e-11 | 1.000000 |
| PAH10+CH3                     | 1.14592e-11 | 1.000000 | 1.14592e-11 | 1.000000 |

|                               |             |         |             |         |
|-------------------------------|-------------|---------|-------------|---------|
| PAH3+H                        | 1.12460e-11 | 1.00000 | 1.12460e-11 | 1.00000 |
| rad46                         | 9.72339e-12 | 1.00000 | 9.72339e-12 | 1.00000 |
| PhcycC3H3_A+H                 | 2.33055e-12 | 1.00000 | 2.33055e-12 | 1.00000 |
| rad59                         | 2.28644e-12 | 1.00000 | 2.28644e-12 | 1.00000 |
| rad43                         | 4.93134e-13 | 1.00000 | 4.93134e-13 | 1.00000 |
| rad54                         | 4.22329e-13 | 1.00000 | 4.22329e-13 | 1.00000 |
| rad62                         | 1.07950e-13 | 1.00000 | 1.07950e-13 | 1.00000 |
| rad50                         | 7.74708e-14 | 1.00000 | 7.74708e-14 | 1.00000 |
| Benzene+cycloprop-1-enylidene | 6.98038e-14 | 1.00000 | 6.98038e-14 | 1.00000 |
| rad70                         | 8.06778e-15 | 1.00000 | 8.06778e-15 | 1.00000 |
| Phenyl+cycC3H4                | 7.86468e-15 | 1.00000 | 0.00000     | 1.00000 |
| rad55                         | 3.56771e-15 | 1.00000 | 3.56771e-15 | 1.00000 |
| PAH1+H                        | 2.06248e-15 | 1.00000 | 2.06248e-15 | 1.00000 |
| rad52                         | 5.66688e-16 | 1.00000 | 5.66688e-16 | 1.00000 |
| PhcycC3H3_B+H                 | 3.56809e-16 | 1.00000 | 3.56809e-16 | 1.00000 |
| rad58                         | 2.12353e-16 | 1.00000 | 2.12353e-16 | 1.00000 |
| rad51                         | 1.64153e-16 | 1.00000 | 1.64153e-16 | 1.00000 |
| rad34                         | 1.10591e-16 | 1.00000 | 1.10591e-16 | 1.00000 |
| rad41                         | 1.79637e-17 | 1.00000 | 1.79637e-17 | 1.00000 |
| rad42                         | 1.49199e-17 | 1.00000 | 1.49199e-17 | 1.00000 |
| rad65                         | 3.52593e-18 | 1.00000 | 3.52593e-18 | 1.00000 |
| rad53                         | 5.31291e-21 | 1.00000 | 5.31291e-21 | 1.00000 |
| rad64                         | 3.40958e-22 | 1.00000 | 3.40958e-22 | 1.00000 |
| rad6                          | 3.93231e-24 | 1.00000 | 3.93231e-24 | 1.00000 |
| rad61                         | 9.89207e-25 | 1.00000 | 9.89207e-25 | 1.00000 |
| rad56                         | 1.24741e-26 | 1.00000 | 1.24741e-26 | 1.00000 |
| rad28                         | 5.56563e-27 | 1.00000 | 5.56563e-27 | 1.00000 |
| rad2                          | 1.73197e-27 | 1.00000 | 1.73197e-27 | 1.00000 |
| rad26                         | 1.05786e-27 | 1.00000 | 1.05786e-27 | 1.00000 |
| rad68syn                      | 6.17061e-28 | 1.00000 | 6.17061e-28 | 1.00000 |
| rad68anti                     | 4.99488e-28 | 1.00000 | 4.99488e-28 | 1.00000 |
| rad7                          | 2.88051e-28 | 1.00000 | 2.88051e-28 | 1.00000 |
| rad1                          | 1.12038e-28 | 1.00000 | 1.12038e-28 | 1.00000 |
| rad10                         | 8.82270e-29 | 1.00000 | 8.82270e-29 | 1.00000 |
| rad11                         | 7.09334e-29 | 1.00000 | 7.09334e-29 | 1.00000 |
| rad3                          | 1.09095e-29 | 1.00000 | 1.09095e-29 | 1.00000 |
| rad47                         | 6.47679e-30 | 1.00000 | 6.47679e-30 | 1.00000 |
| rad4                          | 5.54085e-30 | 1.00000 | 5.54085e-30 | 1.00000 |
| rad13                         | 1.59633e-30 | 1.00000 | 1.59633e-30 | 1.00000 |
| rad9                          | 1.21786e-31 | 1.00000 | 1.21786e-31 | 1.00000 |
| rad40syn                      | 1.64573e-32 | 1.00000 | 1.64573e-32 | 1.00000 |
| rad19anti                     | 1.46745e-32 | 1.00000 | 1.46745e-32 | 1.00000 |
| rad40anti                     | 1.29414e-32 | 1.00000 | 1.29414e-32 | 1.00000 |
| rad14                         | 4.65991e-33 | 1.00000 | 4.65991e-33 | 1.00000 |
| rad33                         | 3.02061e-33 | 1.00000 | 3.02061e-33 | 1.00000 |
| rad25                         | 2.63797e-33 | 1.00000 | 2.63797e-33 | 1.00000 |
| rad73                         | 1.92332e-33 | 1.00000 | 1.92332e-33 | 1.00000 |
| rad27                         | 1.49980e-33 | 1.00000 | 1.49980e-33 | 1.00000 |
| rad5                          | 5.95533e-35 | 1.00000 | 5.95533e-35 | 1.00000 |
| rad15                         | 5.32310e-35 | 1.00000 | 5.32310e-35 | 1.00000 |
| PAH8+H                        | 4.13571e-35 | 1.00000 | 4.13571e-35 | 1.00000 |
| rad31                         | 3.81523e-37 | 1.00000 | 3.81523e-37 | 1.00000 |
| rad23                         | 2.89582e-38 | 1.00000 | 2.89582e-38 | 1.00000 |
| rad71                         | 1.32207e-38 | 1.00000 | 1.32207e-38 | 1.00000 |
| rad20                         | 1.06999e-38 | 1.00000 | 1.06999e-38 | 1.00000 |
| rad21                         | 7.99805e-39 | 1.00000 | 7.99805e-39 | 1.00000 |
| rad12                         | 6.02237e-40 | 1.00000 | 6.02237e-40 | 1.00000 |
| rad45                         | 2.06902e-40 | 1.00000 | 2.06902e-40 | 1.00000 |
| rad22                         | 9.47931e-41 | 1.00000 | 9.47931e-41 | 1.00000 |
| rad18                         | 4.58621e-41 | 1.00000 | 4.58621e-41 | 1.00000 |
| rad36                         | 1.26777e-41 | 1.00000 | 1.26777e-41 | 1.00000 |
| rad19syn                      | 9.31466e-42 | 1.00000 | 9.31466e-42 | 1.00000 |
| rad24                         | 8.90279e-46 | 1.00000 | 8.90279e-46 | 1.00000 |
| rad8                          | 4.02268e-63 | 1.00000 | 4.02268e-63 | 1.00000 |

0.100000000E-03 Pa, 130.000000 K

| Rate constant             | True (fraction)        | Effective (fraction)   |
|---------------------------|------------------------|------------------------|
| Total                     | 3.81236e-15 (1.00 )    | 3.81236e-15 (1.00 )    |
| Formation of rad19        | 3.81236e-15 (1.000 )   | 3.81236e-15 (1.000 )   |
| H-abstraction to cyc2enyl | 1.44825e-21 (3.80e-07) | 1.44825e-21 (3.80e-07) |
| H-abstraction to cyclenyl | 2.94348e-27 (7.72e-13) | 2.94348e-27 (7.72e-13) |

| species    | PYtrue      | Cumul    | PYeffective | Cumul    |
|------------|-------------|----------|-------------|----------|
| Indene+H   | 0.999713    | 0.999713 | 0.999713    | 0.999713 |
| PhCHCCH2+H | 0.000272881 | 0.999986 | 0.000272881 | 0.999986 |
| PhCCH+CH3  | 4.80153e-06 | 0.999990 | 4.80153e-06 | 0.999990 |
| C2H2+PhCH2 | 3.57963e-06 | 0.999994 | 3.57963e-06 | 0.999994 |

|                               |             |          |             |          |
|-------------------------------|-------------|----------|-------------|----------|
| PhCCCH3+H                     | 2.76568e-06 | 0.999997 | 2.76568e-06 | 0.999997 |
| Ph+MeAc                       | 2.16669e-06 | 0.999999 | 2.16669e-06 | 0.999999 |
| rad67                         | 6.46537e-07 | 0.999999 | 6.46537e-07 | 0.999999 |
| Benzene+cycloprop-2-enylidene | 3.79882e-07 | 1.000000 | 3.79882e-07 | 1.000000 |
| rad35                         | 2.82679e-07 | 1.000000 | 2.82679e-07 | 1.000000 |
| Ph+Allene                     | 2.10171e-07 | 1.000000 | 2.10171e-07 | 1.000000 |
| PhCH2CCH+H                    | 2.74418e-08 | 1.000000 | 2.74418e-08 | 1.000000 |
| PAH7+H                        | 2.61176e-08 | 1.000000 | 2.61176e-08 | 1.000000 |
| rad39                         | 7.37103e-09 | 1.000000 | 7.37103e-09 | 1.000000 |
| rad37                         | 6.93325e-09 | 1.000000 | 6.93325e-09 | 1.000000 |
| rad30                         | 5.32332e-09 | 1.000000 | 5.32332e-09 | 1.000000 |
| PAH9+H                        | 3.79198e-10 | 1.000000 | 3.79198e-10 | 1.000000 |
| rad38                         | 1.66031e-10 | 1.000000 | 1.66031e-10 | 1.000000 |
| rad60syn                      | 2.61046e-11 | 1.000000 | 2.61046e-11 | 1.000000 |
| rad60anti                     | 1.28850e-11 | 1.000000 | 1.28850e-11 | 1.000000 |
| PAH10+CH3                     | 1.27170e-11 | 1.000000 | 1.27170e-11 | 1.000000 |
| PAH3+H                        | 1.21014e-11 | 1.000000 | 1.21014e-11 | 1.000000 |
| rad46                         | 1.03117e-11 | 1.000000 | 1.03117e-11 | 1.000000 |
| PhcycC3H3_A+H                 | 2.92360e-12 | 1.000000 | 2.92360e-12 | 1.000000 |
| rad59                         | 2.45280e-12 | 1.000000 | 2.45280e-12 | 1.000000 |
| Benzene+cycloprop-1-enylidene | 7.72089e-13 | 1.000000 | 7.72089e-13 | 1.000000 |
| rad43                         | 5.40146e-13 | 1.000000 | 5.40146e-13 | 1.000000 |
| rad54                         | 4.68137e-13 | 1.000000 | 4.68137e-13 | 1.000000 |
| rad62                         | 1.18544e-13 | 1.000000 | 1.18544e-13 | 1.000000 |
| rad50                         | 8.45242e-14 | 1.000000 | 8.45242e-14 | 1.000000 |
| Phenyl+cycC3H4                | 1.18041e-14 | 1.000000 | 0.000000    | 1.000000 |
| rad70                         | 9.23845e-15 | 1.000000 | 9.23845e-15 | 1.000000 |
| rad55                         | 4.08798e-15 | 1.000000 | 4.08798e-15 | 1.000000 |
| PAH1+H                        | 2.48388e-15 | 1.000000 | 2.48388e-15 | 1.000000 |
| PhcycC3H3_B+H                 | 8.71416e-16 | 1.000000 | 8.71416e-16 | 1.000000 |
| rad52                         | 6.31956e-16 | 1.000000 | 6.31956e-16 | 1.000000 |
| rad58                         | 2.46719e-16 | 1.000000 | 2.46719e-16 | 1.000000 |
| rad51                         | 1.88032e-16 | 1.000000 | 1.88032e-16 | 1.000000 |
| rad34                         | 1.33591e-16 | 1.000000 | 1.33591e-16 | 1.000000 |
| rad41                         | 2.28985e-17 | 1.000000 | 2.28985e-17 | 1.000000 |
| rad42                         | 1.85489e-17 | 1.000000 | 1.85489e-17 | 1.000000 |
| rad65                         | 4.09076e-18 | 1.000000 | 4.09076e-18 | 1.000000 |
| rad53                         | 1.20421e-20 | 1.000000 | 1.20421e-20 | 1.000000 |
| rad64                         | 1.00143e-21 | 1.000000 | 1.00143e-21 | 1.000000 |
| rad61                         | 6.20138e-24 | 1.000000 | 6.20138e-24 | 1.000000 |
| rad6                          | 2.87511e-24 | 1.000000 | 2.87511e-24 | 1.000000 |
| rad56                         | 1.06322e-25 | 1.000000 | 1.06322e-25 | 1.000000 |
| rad68syn                      | 6.24497e-27 | 1.000000 | 6.24497e-27 | 1.000000 |
| rad68anti                     | 5.02752e-27 | 1.000000 | 5.02752e-27 | 1.000000 |
| rad28                         | 4.16403e-27 | 1.000000 | 4.16403e-27 | 1.000000 |
| rad2                          | 1.26772e-27 | 1.000000 | 1.26772e-27 | 1.000000 |
| rad26                         | 8.35073e-28 | 1.000000 | 8.35073e-28 | 1.000000 |
| rad7                          | 2.10872e-28 | 1.000000 | 2.10872e-28 | 1.000000 |
| rad1                          | 8.23530e-29 | 1.000000 | 8.23530e-29 | 1.000000 |
| rad10                         | 6.46865e-29 | 1.000000 | 6.46865e-29 | 1.000000 |
| rad11                         | 5.19360e-29 | 1.000000 | 5.19360e-29 | 1.000000 |
| rad3                          | 7.98170e-30 | 1.000000 | 7.98170e-30 | 1.000000 |
| rad47                         | 6.28154e-30 | 1.000000 | 6.28154e-30 | 1.000000 |
| rad4                          | 4.05820e-30 | 1.000000 | 4.05820e-30 | 1.000000 |
| rad13                         | 1.17046e-30 | 1.000000 | 1.17046e-30 | 1.000000 |
| rad40syn                      | 4.43600e-31 | 1.000000 | 4.43600e-31 | 1.000000 |
| rad40anti                     | 3.49255e-31 | 1.000000 | 3.49255e-31 | 1.000000 |
| rad9                          | 1.21136e-31 | 1.000000 | 1.21136e-31 | 1.000000 |
| rad73                         | 3.97401e-32 | 1.000000 | 3.97401e-32 | 1.000000 |
| rad19anti                     | 2.96700e-32 | 1.000000 | 2.96700e-32 | 1.000000 |
| rad14                         | 4.06386e-33 | 1.000000 | 4.06386e-33 | 1.000000 |
| rad25                         | 2.27569e-33 | 1.000000 | 2.27569e-33 | 1.000000 |
| PAH8+H                        | 2.25812e-33 | 1.000000 | 2.25812e-33 | 1.000000 |
| rad33                         | 2.21750e-33 | 1.000000 | 2.21750e-33 | 1.000000 |
| rad27                         | 1.18442e-33 | 1.000000 | 1.18442e-33 | 1.000000 |
| rad15                         | 5.30350e-35 | 1.000000 | 5.30350e-35 | 1.000000 |
| rad5                          | 5.06915e-35 | 1.000000 | 5.06915e-35 | 1.000000 |
| rad71                         | 1.12265e-36 | 1.000000 | 1.12265e-36 | 1.000000 |
| rad31                         | 6.15065e-37 | 1.000000 | 6.15065e-37 | 1.000000 |
| rad23                         | 1.95788e-38 | 1.000000 | 1.95788e-38 | 1.000000 |
| rad20                         | 8.36580e-39 | 1.000000 | 8.36580e-39 | 1.000000 |
| rad21                         | 6.27280e-39 | 1.000000 | 6.27280e-39 | 1.000000 |
| rad12                         | 6.04906e-40 | 1.000000 | 6.04906e-40 | 1.000000 |
| rad45                         | 1.39313e-40 | 1.000000 | 1.39313e-40 | 1.000000 |
| rad22                         | 6.71976e-41 | 1.000000 | 6.71976e-41 | 1.000000 |
| rad18                         | 3.59631e-41 | 1.000000 | 3.59631e-41 | 1.000000 |
| rad19syn                      | 2.10397e-41 | 1.000000 | 2.10397e-41 | 1.000000 |
| rad36                         | 8.54231e-42 | 1.000000 | 8.54231e-42 | 1.000000 |
| rad24                         | 9.59606e-46 | 1.000000 | 9.59606e-46 | 1.000000 |
| rad8                          | 5.76932e-63 | 1.000000 | 5.76932e-63 | 1.000000 |

0.100000000E-03 Pa, 140.00000 K

=====

| Rate constant             | True (fraction)        | Effective (fraction)   |
|---------------------------|------------------------|------------------------|
| Total                     | 4.99515e-15 (1.00 )    | 4.99515e-15 (1.00 )    |
| Formation of rad19        | 4.99514e-15 (1.000 )   | 4.99514e-15 (1.000 )   |
| H-abstraction to cyc2enyl | 5.62488e-21 (1.13e-06) | 5.62488e-21 (1.13e-06) |
| H-abstraction to cyclenyl | 3.00047e-26 (6.01e-12) | 3.00047e-26 (6.01e-12) |

| species                       | PYtrue      | Cumul    | PYeffective | Cumul    |
|-------------------------------|-------------|----------|-------------|----------|
| Indene+H                      | 0.999703    | 0.999703 | 0.999703    | 0.999703 |
| PhCHCCH2+H                    | 0.000280917 | 0.999984 | 0.000280917 | 0.999984 |
| PhCCH+CH3                     | 4.95293e-06 | 0.999989 | 4.95293e-06 | 0.999989 |
| C2H2+PhCH2                    | 3.71775e-06 | 0.999992 | 3.71775e-06 | 0.999992 |
| PhCCCH3+H                     | 2.86259e-06 | 0.999995 | 2.86259e-06 | 0.999995 |
| Ph+MeAc                       | 2.26006e-06 | 0.999998 | 2.26006e-06 | 0.999998 |
| Benzene+cycloprop-2-enylidene | 1.12607e-06 | 0.999999 | 1.12607e-06 | 0.999999 |
| rad67                         | 6.73023e-07 | 0.999999 | 6.73023e-07 | 0.999999 |
| rad35                         | 2.93770e-07 | 1.000000 | 2.93770e-07 | 1.000000 |
| Ph+Allene                     | 2.22655e-07 | 1.000000 | 2.22655e-07 | 1.000000 |
| PhCH2CCH+H                    | 2.93544e-08 | 1.000000 | 2.93544e-08 | 1.000000 |
| PAH7+H                        | 2.74315e-08 | 1.000000 | 2.74315e-08 | 1.000000 |
| rad39                         | 7.74190e-09 | 1.000000 | 7.74190e-09 | 1.000000 |
| rad37                         | 7.30374e-09 | 1.000000 | 7.30374e-09 | 1.000000 |
| rad30                         | 5.53887e-09 | 1.000000 | 5.53887e-09 | 1.000000 |
| PAH9+H                        | 3.99474e-10 | 1.000000 | 3.99474e-10 | 1.000000 |
| rad38                         | 1.75884e-10 | 1.000000 | 1.75884e-10 | 1.000000 |
| rad60syn                      | 2.76144e-11 | 1.000000 | 2.76144e-11 | 1.000000 |
| PAH10+CH3                     | 1.41941e-11 | 1.000000 | 1.41941e-11 | 1.000000 |
| rad60anti                     | 1.36504e-11 | 1.000000 | 1.36504e-11 | 1.000000 |
| PAH3+H                        | 1.30742e-11 | 1.000000 | 1.30742e-11 | 1.000000 |
| rad46                         | 1.09701e-11 | 1.000000 | 1.09701e-11 | 1.000000 |
| Benzene+cycloprop-1-enylidene | 6.00677e-12 | 1.000000 | 6.00677e-12 | 1.000000 |
| PhcycC3H3_A+H                 | 3.69543e-12 | 1.000000 | 3.69543e-12 | 1.000000 |
| rad59                         | 2.64124e-12 | 1.000000 | 2.64124e-12 | 1.000000 |
| rad43                         | 5.94442e-13 | 1.000000 | 5.94442e-13 | 1.000000 |
| rad54                         | 5.21894e-13 | 1.000000 | 5.21894e-13 | 1.000000 |
| rad62                         | 1.30792e-13 | 1.000000 | 1.30792e-13 | 1.000000 |
| rad50                         | 9.26870e-14 | 1.000000 | 9.26870e-14 | 1.000000 |
| Phenyl+cycC3H4                | 1.75978e-14 | 1.000000 | 0.000000    | 1.000000 |
| rad70                         | 1.06595e-14 | 1.000000 | 1.06595e-14 | 1.000000 |
| rad55                         | 4.71959e-15 | 1.000000 | 4.71959e-15 | 1.000000 |
| PAH1+H                        | 3.02067e-15 | 1.000000 | 3.02067e-15 | 1.000000 |
| PhcycC3H3_B+H                 | 1.95210e-15 | 1.000000 | 1.95210e-15 | 1.000000 |
| rad52                         | 7.09379e-16 | 1.000000 | 7.09379e-16 | 1.000000 |
| rad58                         | 2.89094e-16 | 1.000000 | 2.89094e-16 | 1.000000 |
| rad51                         | 2.17200e-16 | 1.000000 | 2.17200e-16 | 1.000000 |
| rad34                         | 1.62980e-16 | 1.000000 | 1.62980e-16 | 1.000000 |
| rad41                         | 2.94362e-17 | 1.000000 | 2.94362e-17 | 1.000000 |
| rad42                         | 2.32495e-17 | 1.000000 | 2.32495e-17 | 1.000000 |
| rad65                         | 4.78918e-18 | 1.000000 | 4.78918e-18 | 1.000000 |
| rad53                         | 2.52905e-20 | 1.000000 | 2.52905e-20 | 1.000000 |
| rad64                         | 2.62047e-21 | 1.000000 | 2.62047e-21 | 1.000000 |
| rad61                         | 3.06689e-23 | 1.000000 | 3.06689e-23 | 1.000000 |
| rad6                          | 2.16564e-24 | 1.000000 | 2.16564e-24 | 1.000000 |
| rad56                         | 6.80079e-25 | 1.000000 | 6.80079e-25 | 1.000000 |
| rad68syn                      | 4.60290e-26 | 1.000000 | 4.60290e-26 | 1.000000 |
| rad68anti                     | 3.68674e-26 | 1.000000 | 3.68674e-26 | 1.000000 |
| rad28                         | 3.20096e-27 | 1.000000 | 3.20096e-27 | 1.000000 |
| rad2                          | 9.60423e-28 | 1.000000 | 9.60423e-28 | 1.000000 |
| rad26                         | 6.79114e-28 | 1.000000 | 6.79114e-28 | 1.000000 |
| rad7                          | 1.59057e-28 | 1.000000 | 1.59057e-28 | 1.000000 |
| rad1                          | 6.26780e-29 | 1.000000 | 6.26780e-29 | 1.000000 |
| rad10                         | 4.90907e-29 | 1.000000 | 4.90907e-29 | 1.000000 |
| rad11                         | 3.91818e-29 | 1.000000 | 3.91818e-29 | 1.000000 |
| rad40syn                      | 7.53653e-30 | 1.000000 | 7.53653e-30 | 1.000000 |
| rad47                         | 6.17180e-30 | 1.000000 | 6.17180e-30 | 1.000000 |
| rad3                          | 6.03812e-30 | 1.000000 | 6.03812e-30 | 1.000000 |
| rad40anti                     | 5.95184e-30 | 1.000000 | 5.95184e-30 | 1.000000 |
| rad4                          | 3.07366e-30 | 1.000000 | 3.07366e-30 | 1.000000 |
| rad13                         | 8.84236e-31 | 1.000000 | 8.84236e-31 | 1.000000 |
| rad73                         | 5.47774e-31 | 1.000000 | 5.47774e-31 | 1.000000 |
| rad9                          | 1.25002e-31 | 1.000000 | 1.25002e-31 | 1.000000 |
| PAH8+H                        | 6.68140e-32 | 1.000000 | 6.68140e-32 | 1.000000 |
| rad19anti                     | 6.35625e-32 | 1.000000 | 6.35625e-32 | 1.000000 |
| rad14                         | 3.66181e-33 | 1.000000 | 3.66181e-33 | 1.000000 |
| rad25                         | 2.03447e-33 | 1.000000 | 2.03447e-33 | 1.000000 |
| rad33                         | 1.67742e-33 | 1.000000 | 1.67742e-33 | 1.000000 |

|          |             |          |             |          |
|----------|-------------|----------|-------------|----------|
| rad27    | 9.76903e-34 | 1.000000 | 9.76903e-34 | 1.000000 |
| rad15    | 5.48216e-35 | 1.000000 | 5.48216e-35 | 1.000000 |
| rad5     | 4.38079e-35 | 1.000000 | 4.38079e-35 | 1.000000 |
| rad71    | 4.16928e-35 | 1.000000 | 4.16928e-35 | 1.000000 |
| rad31    | 1.07116e-36 | 1.000000 | 1.07116e-36 | 1.000000 |
| rad23    | 1.41511e-38 | 1.000000 | 1.41511e-38 | 1.000000 |
| rad20    | 6.76932e-39 | 1.000000 | 6.76932e-39 | 1.000000 |
| rad21    | 5.09401e-39 | 1.000000 | 5.09401e-39 | 1.000000 |
| rad12    | 6.31091e-40 | 1.000000 | 6.31091e-40 | 1.000000 |
| rad45    | 1.00347e-40 | 1.000000 | 1.00347e-40 | 1.000000 |
| rad19syn | 4.98180e-41 | 1.000000 | 4.98180e-41 | 1.000000 |
| rad22    | 4.96193e-41 | 1.000000 | 4.96193e-41 | 1.000000 |
| rad18    | 2.91655e-41 | 1.000000 | 2.91655e-41 | 1.000000 |
| rad36    | 6.15873e-42 | 1.000000 | 6.15873e-42 | 1.000000 |
| rad24    | 1.10224e-45 | 1.000000 | 1.10224e-45 | 1.000000 |
| rad8     | 8.48127e-63 | 1.000000 | 8.48127e-63 | 1.000000 |

0.100000000E-03 Pa, 150.000000 K

```

=====
Rate constant      | True (fraction)      Effective (fraction)
-----
Total              | 6.34137e-15 (1.00   ) 6.34137e-15 (1.00   )
Formation of rad19| 6.34135e-15 (1.000  ) 6.34135e-15 (1.000  )
H-abstraction to cyc2enyl| 1.81685e-20 (2.87e-06) 1.81685e-20 (2.87e-06)
H-abstraction to cyclenyl| 2.23765e-25 (3.53e-11) 2.23765e-25 (3.53e-11)

```

| species                       | PYtrue      | Cumul    | PYeffective | Cumul    |
|-------------------------------|-------------|----------|-------------|----------|
| Indene+H                      | 0.999692    | 0.999692 | 0.999692    | 0.999692 |
| PhCHCCH2+H                    | 0.000289592 | 0.999982 | 0.000289592 | 0.999982 |
| PhCCH+CH3                     | 5.11622e-06 | 0.999987 | 5.11622e-06 | 0.999987 |
| C2H2+PhCH2                    | 3.86832e-06 | 0.999991 | 3.86832e-06 | 0.999991 |
| PhCCCH3+H                     | 2.96768e-06 | 0.999994 | 2.96768e-06 | 0.999994 |
| Benzene+cycloprop-2-enylidene | 2.86508e-06 | 0.999997 | 2.86508e-06 | 0.999997 |
| Ph+MeAc                       | 2.36224e-06 | 0.999999 | 2.36224e-06 | 0.999999 |
| rad67                         | 7.01968e-07 | 1.000000 | 7.01968e-07 | 1.000000 |
| rad35                         | 3.05868e-07 | 1.000000 | 3.05868e-07 | 1.000000 |
| Ph+Allene                     | 2.36593e-07 | 1.000000 | 2.36593e-07 | 1.000000 |
| PhCH2CCH+H                    | 3.15138e-08 | 1.000000 | 3.15138e-08 | 1.000000 |
| PAH7+H                        | 2.88834e-08 | 1.000000 | 2.88834e-08 | 1.000000 |
| rad39                         | 8.15153e-09 | 1.000000 | 8.15153e-09 | 1.000000 |
| rad37                         | 7.71443e-09 | 1.000000 | 7.71443e-09 | 1.000000 |
| rad30                         | 5.77469e-09 | 1.000000 | 5.77469e-09 | 1.000000 |
| PAH9+H                        | 4.22004e-10 | 1.000000 | 4.22004e-10 | 1.000000 |
| rad38                         | 1.86916e-10 | 1.000000 | 1.86916e-10 | 1.000000 |
| Benzene+cycloprop-1-enylidene | 3.52865e-11 | 1.000000 | 3.52865e-11 | 1.000000 |
| rad60syn                      | 2.92987e-11 | 1.000000 | 2.92987e-11 | 1.000000 |
| PAH10+CH3                     | 1.59405e-11 | 1.000000 | 1.59405e-11 | 1.000000 |
| rad60anti                     | 1.45059e-11 | 1.000000 | 1.45059e-11 | 1.000000 |
| PAH3+H                        | 1.41865e-11 | 1.000000 | 1.41865e-11 | 1.000000 |
| rad46                         | 1.17103e-11 | 1.000000 | 1.17103e-11 | 1.000000 |
| PhcycC3H3_A+H                 | 4.70694e-12 | 1.000000 | 4.70694e-12 | 1.000000 |
| rad59                         | 2.85582e-12 | 1.000000 | 2.85582e-12 | 1.000000 |
| rad43                         | 6.57515e-13 | 1.000000 | 6.57515e-13 | 1.000000 |
| rad54                         | 5.85419e-13 | 1.000000 | 5.85419e-13 | 1.000000 |
| rad62                         | 1.45029e-13 | 1.000000 | 1.45029e-13 | 1.000000 |
| rad50                         | 1.02197e-13 | 1.000000 | 1.02197e-13 | 1.000000 |
| Phenyl+cycC3H4                | 2.61242e-14 | 1.000000 | 0.000000    | 1.000000 |
| rad70                         | 1.23989e-14 | 1.000000 | 1.23989e-14 | 1.000000 |
| rad55                         | 5.49265e-15 | 1.000000 | 5.49265e-15 | 1.000000 |
| PhcycC3H3_B+H                 | 4.08980e-15 | 1.000000 | 4.08980e-15 | 1.000000 |
| PAH1+H                        | 3.71098e-15 | 1.000000 | 3.71098e-15 | 1.000000 |
| rad52                         | 8.01962e-16 | 1.000000 | 8.01962e-16 | 1.000000 |
| rad58                         | 3.41819e-16 | 1.000000 | 3.41819e-16 | 1.000000 |
| rad51                         | 2.53169e-16 | 1.000000 | 2.53169e-16 | 1.000000 |
| rad34                         | 2.00898e-16 | 1.000000 | 2.00898e-16 | 1.000000 |
| rad41                         | 3.81680e-17 | 1.000000 | 3.81680e-17 | 1.000000 |
| rad42                         | 2.93828e-17 | 1.000000 | 2.93828e-17 | 1.000000 |
| rad65                         | 5.66144e-18 | 1.000000 | 5.66144e-18 | 1.000000 |
| rad53                         | 5.02075e-20 | 1.000000 | 5.02075e-20 | 1.000000 |
| rad64                         | 6.27479e-21 | 1.000000 | 6.27479e-21 | 1.000000 |
| rad61                         | 1.25963e-22 | 1.000000 | 1.25963e-22 | 1.000000 |
| rad56                         | 3.47171e-24 | 1.000000 | 3.47171e-24 | 1.000000 |
| rad6                          | 1.67610e-24 | 1.000000 | 1.67610e-24 | 1.000000 |
| rad68syn                      | 2.64352e-25 | 1.000000 | 2.64352e-25 | 1.000000 |
| rad68anti                     | 2.10655e-25 | 1.000000 | 2.10655e-25 | 1.000000 |
| rad28                         | 2.52045e-27 | 1.000000 | 2.52045e-27 | 1.000000 |
| rad2                          | 7.52899e-28 | 1.000000 | 7.52899e-28 | 1.000000 |
| rad26                         | 5.68267e-28 | 1.000000 | 5.68267e-28 | 1.000000 |
| rad7                          | 1.23287e-28 | 1.000000 | 1.23287e-28 | 1.000000 |

|           |             |         |             |         |
|-----------|-------------|---------|-------------|---------|
| rad40syn  | 8.88015e-29 | 1.00000 | 8.88015e-29 | 1.00000 |
| rad40anti | 7.03997e-29 | 1.00000 | 7.03997e-29 | 1.00000 |
| rad1      | 4.93817e-29 | 1.00000 | 4.93817e-29 | 1.00000 |
| rad10     | 3.85547e-29 | 1.00000 | 3.85547e-29 | 1.00000 |
| rad11     | 3.03771e-29 | 1.00000 | 3.03771e-29 | 1.00000 |
| rad47     | 6.14009e-30 | 1.00000 | 6.14009e-30 | 1.00000 |
| rad73     | 5.47731e-30 | 1.00000 | 5.47731e-30 | 1.00000 |
| rad3      | 4.71958e-30 | 1.00000 | 4.71958e-30 | 1.00000 |
| rad4      | 2.40560e-30 | 1.00000 | 2.40560e-30 | 1.00000 |
| PAH8+H    | 1.26388e-30 | 1.00000 | 1.26388e-30 | 1.00000 |
| rad13     | 6.86460e-31 | 1.00000 | 6.86460e-31 | 1.00000 |
| rad19anti | 1.44040e-31 | 1.00000 | 1.44040e-31 | 1.00000 |
| rad9      | 1.33406e-31 | 1.00000 | 1.33406e-31 | 1.00000 |
| rad14     | 3.39249e-33 | 1.00000 | 3.39249e-33 | 1.00000 |
| rad25     | 1.87383e-33 | 1.00000 | 1.87383e-33 | 1.00000 |
| rad33     | 1.30404e-33 | 1.00000 | 1.30404e-33 | 1.00000 |
| rad71     | 9.41845e-34 | 1.00000 | 9.41845e-34 | 1.00000 |
| rad27     | 8.39904e-34 | 1.00000 | 8.39904e-34 | 1.00000 |
| rad15     | 5.86112e-35 | 1.00000 | 5.86112e-35 | 1.00000 |
| rad5      | 3.83427e-35 | 1.00000 | 3.83427e-35 | 1.00000 |
| rad31     | 1.98221e-36 | 1.00000 | 1.98221e-36 | 1.00000 |
| rad23     | 1.11153e-38 | 1.00000 | 1.11153e-38 | 1.00000 |
| rad20     | 5.65721e-39 | 1.00000 | 5.65721e-39 | 1.00000 |
| rad21     | 4.27509e-39 | 1.00000 | 4.27509e-39 | 1.00000 |
| rad12     | 6.81918e-40 | 1.00000 | 6.81918e-40 | 1.00000 |
| rad19syn  | 1.23836e-40 | 1.00000 | 1.23836e-40 | 1.00000 |
| rad45     | 7.85955e-41 | 1.00000 | 7.85955e-41 | 1.00000 |
| rad22     | 3.80380e-41 | 1.00000 | 3.80380e-41 | 1.00000 |
| rad18     | 2.43974e-41 | 1.00000 | 2.43974e-41 | 1.00000 |
| rad36     | 4.82946e-42 | 1.00000 | 4.82946e-42 | 1.00000 |
| rad24     | 1.33563e-45 | 1.00000 | 1.33563e-45 | 1.00000 |
| rad8      | 1.27618e-62 | 1.00000 | 1.27618e-62 | 1.00000 |

0.100000000E-03 Pa, 160.000000 K

| Rate constant             | True (fraction)        | Effective (fraction)   |
|---------------------------|------------------------|------------------------|
| Total                     | 7.84423e-15 (1.00 )    | 7.84423e-15 (1.00 )    |
| Formation of rad19        | 7.84418e-15 (1.000 )   | 7.84418e-15 (1.000 )   |
| H-abstraction to cyc2enyl | 5.05321e-20 (6.44e-06) | 5.05321e-20 (6.44e-06) |
| H-abstraction to cyclenyl | 1.29479e-24 (1.65e-10) | 1.29479e-24 (1.65e-10) |

| species                       | PYtrue      | Cumul    | PYeffective | Cumul    |
|-------------------------------|-------------|----------|-------------|----------|
| Indene+H                      | 0.999679    | 0.999679 | 0.999679    | 0.999679 |
| PhCHCCH2+H                    | 0.000298981 | 0.999978 | 0.000298981 | 0.999978 |
| Benzene+cycloprop-2-enylidene | 6.44194e-06 | 0.999984 | 6.44194e-06 | 0.999984 |
| PhCCH+CH3                     | 5.29274e-06 | 0.999989 | 5.29274e-06 | 0.999989 |
| C2H2+PhCH2                    | 4.03295e-06 | 0.999993 | 4.03295e-06 | 0.999993 |
| PhCCCH3+H                     | 3.08198e-06 | 0.999996 | 3.08198e-06 | 0.999996 |
| Ph+MeAc                       | 2.47440e-06 | 0.999999 | 2.47440e-06 | 0.999999 |
| rad67                         | 7.33696e-07 | 1.000000 | 7.33696e-07 | 1.000000 |
| rad35                         | 3.19106e-07 | 1.000000 | 3.19106e-07 | 1.000000 |
| Ph+Allene                     | 2.52221e-07 | 1.000000 | 2.52221e-07 | 1.000000 |
| PhCH2CCH+H                    | 3.39636e-08 | 1.000000 | 3.39636e-08 | 1.000000 |
| PAH7+H                        | 3.04937e-08 | 1.000000 | 3.04937e-08 | 1.000000 |
| rad39                         | 8.60554e-09 | 1.000000 | 8.60554e-09 | 1.000000 |
| rad37                         | 8.17135e-09 | 1.000000 | 8.17135e-09 | 1.000000 |
| rad30                         | 6.03350e-09 | 1.000000 | 6.03350e-09 | 1.000000 |
| PAH9+H                        | 4.47139e-10 | 1.000000 | 4.47139e-10 | 1.000000 |
| rad38                         | 1.99328e-10 | 1.000000 | 1.99328e-10 | 1.000000 |
| Benzene+cycloprop-1-enylidene | 1.65062e-10 | 1.000000 | 1.65062e-10 | 1.000000 |
| rad60syn                      | 3.11858e-11 | 1.000000 | 3.11858e-11 | 1.000000 |
| PAH10+CH3                     | 1.80192e-11 | 1.000000 | 1.80192e-11 | 1.000000 |
| rad60anti                     | 1.54660e-11 | 1.000000 | 1.54660e-11 | 1.000000 |
| PAH3+H                        | 1.54652e-11 | 1.000000 | 1.54652e-11 | 1.000000 |
| rad46                         | 1.25464e-11 | 1.000000 | 1.25464e-11 | 1.000000 |
| PhcycC3H3_A+H                 | 6.04093e-12 | 1.000000 | 6.04093e-12 | 1.000000 |
| rad59                         | 3.10144e-12 | 1.000000 | 3.10144e-12 | 1.000000 |
| rad43                         | 7.31199e-13 | 1.000000 | 7.31199e-13 | 1.000000 |
| rad54                         | 6.60996e-13 | 1.000000 | 6.60996e-13 | 1.000000 |
| rad62                         | 1.61670e-13 | 1.000000 | 1.61670e-13 | 1.000000 |
| rad50                         | 1.13348e-13 | 1.000000 | 1.13348e-13 | 1.000000 |
| Phenyl+cycC3H4                | 3.86829e-14 | 1.000000 | 0.000000    | 1.000000 |
| rad70                         | 1.45450e-14 | 1.000000 | 1.45450e-14 | 1.000000 |
| PhcycC3H3_B+H                 | 8.12740e-15 | 1.000000 | 8.12740e-15 | 1.000000 |
| rad55                         | 6.44640e-15 | 1.000000 | 6.44640e-15 | 1.000000 |
| PAH1+H                        | 4.60675e-15 | 1.000000 | 4.60675e-15 | 1.000000 |
| rad52                         | 9.13556e-16 | 1.000000 | 9.13556e-16 | 1.000000 |
| rad58                         | 4.08004e-16 | 1.000000 | 4.08004e-16 | 1.000000 |



|           |             |         |             |         |
|-----------|-------------|---------|-------------|---------|
| rad51     | 2.97947e-16 | 1.00000 | 2.97947e-16 | 1.00000 |
| rad34     | 2.50268e-16 | 1.00000 | 2.50268e-16 | 1.00000 |
| rad41     | 4.99157e-17 | 1.00000 | 4.99157e-17 | 1.00000 |
| rad42     | 3.74393e-17 | 1.00000 | 3.74393e-17 | 1.00000 |
| rad65     | 6.76143e-18 | 1.00000 | 6.76143e-18 | 1.00000 |
| rad53     | 9.55472e-20 | 1.00000 | 9.55472e-20 | 1.00000 |
| rad64     | 1.40199e-20 | 1.00000 | 1.40199e-20 | 1.00000 |
| rad61     | 4.46329e-22 | 1.00000 | 4.46329e-22 | 1.00000 |
| rad56     | 1.48087e-23 | 1.00000 | 1.48087e-23 | 1.00000 |
| rad6      | 1.33173e-24 | 1.00000 | 1.33173e-24 | 1.00000 |
| rad68syn  | 1.24418e-24 | 1.00000 | 1.24418e-24 | 1.00000 |
| rad68anti | 9.86142e-25 | 1.00000 | 9.86142e-25 | 1.00000 |
| rad28     | 2.02949e-27 | 1.00000 | 2.02949e-27 | 1.00000 |
| rad40syn  | 7.79816e-28 | 1.00000 | 7.79816e-28 | 1.00000 |
| rad40anti | 6.20621e-28 | 1.00000 | 6.20621e-28 | 1.00000 |
| rad2      | 6.12927e-28 | 1.00000 | 6.12927e-28 | 1.00000 |
| rad26     | 4.89757e-28 | 1.00000 | 4.89757e-28 | 1.00000 |
| rad7      | 9.81137e-29 | 1.00000 | 9.81137e-29 | 1.00000 |
| rad73     | 4.23079e-29 | 1.00000 | 4.23079e-29 | 1.00000 |
| rad1      | 4.04211e-29 | 1.00000 | 4.04211e-29 | 1.00000 |
| rad10     | 3.14460e-29 | 1.00000 | 3.14460e-29 | 1.00000 |
| rad11     | 2.41811e-29 | 1.00000 | 2.41811e-29 | 1.00000 |
| PAH8+H    | 1.68146e-29 | 1.00000 | 1.68146e-29 | 1.00000 |
| rad47     | 6.18362e-30 | 1.00000 | 6.18362e-30 | 1.00000 |
| rad3      | 3.82117e-30 | 1.00000 | 3.82117e-30 | 1.00000 |
| rad4      | 1.95048e-30 | 1.00000 | 1.95048e-30 | 1.00000 |
| rad13     | 5.47170e-31 | 1.00000 | 5.47170e-31 | 1.00000 |
| rad19anti | 3.44740e-31 | 1.00000 | 3.44740e-31 | 1.00000 |
| rad9      | 1.46995e-31 | 1.00000 | 1.46995e-31 | 1.00000 |
| rad71     | 1.46141e-32 | 1.00000 | 1.46141e-32 | 1.00000 |
| rad14     | 3.22077e-33 | 1.00000 | 3.22077e-33 | 1.00000 |
| rad25     | 1.76987e-33 | 1.00000 | 1.76987e-33 | 1.00000 |
| rad33     | 1.04095e-33 | 1.00000 | 1.04095e-33 | 1.00000 |
| rad27     | 7.52347e-34 | 1.00000 | 7.52347e-34 | 1.00000 |
| rad15     | 6.47006e-35 | 1.00000 | 6.47006e-35 | 1.00000 |
| rad5      | 3.39216e-35 | 1.00000 | 3.39216e-35 | 1.00000 |
| rad31     | 3.86530e-36 | 1.00000 | 3.86530e-36 | 1.00000 |
| rad23     | 9.86895e-39 | 1.00000 | 9.86895e-39 | 1.00000 |
| rad20     | 4.88180e-39 | 1.00000 | 4.88180e-39 | 1.00000 |
| rad21     | 3.70744e-39 | 1.00000 | 3.70744e-39 | 1.00000 |
| rad12     | 7.62061e-40 | 1.00000 | 7.62061e-40 | 1.00000 |
| rad19syn  | 3.23538e-40 | 1.00000 | 3.23538e-40 | 1.00000 |
| rad45     | 6.96315e-41 | 1.00000 | 6.96315e-41 | 1.00000 |
| rad22     | 3.02719e-41 | 1.00000 | 3.02719e-41 | 1.00000 |
| rad18     | 2.10305e-41 | 1.00000 | 2.10305e-41 | 1.00000 |
| rad36     | 4.28486e-42 | 1.00000 | 4.28486e-42 | 1.00000 |
| rad24     | 1.69268e-45 | 1.00000 | 1.69268e-45 | 1.00000 |
| rad8      | 1.96353e-62 | 1.00000 | 1.96353e-62 | 1.00000 |

0.100000000E-03 Pa, 170.000000 K

=====

| Rate constant             | True (fraction)        | Effective (fraction)   |
|---------------------------|------------------------|------------------------|
| Total                     | 9.49598e-15 (1.00 )    | 9.49598e-15 (1.00 )    |
| Formation of rad19        | 9.49586e-15 (1.000 )   | 9.49586e-15 (1.000 )   |
| H-abstraction to cyc2enyl | 1.24279e-19 (1.31e-05) | 1.24279e-19 (1.31e-05) |
| H-abstraction to cyclenyl | 6.08025e-24 (6.40e-10) | 6.08025e-24 (6.40e-10) |

| species                       | PYtrue      | Cumul    | PYeffective | Cumul    |
|-------------------------------|-------------|----------|-------------|----------|
| Indene+H                      | 0.999661    | 0.999661 | 0.999661    | 0.999661 |
| PhCHCCH2+H                    | 0.000309167 | 0.999970 | 0.000309167 | 0.999970 |
| Benzene+cycloprop-2-enylidene | 1.30875e-05 | 0.999983 | 1.30875e-05 | 0.999983 |
| PhCCH+CH3                     | 5.48397e-06 | 0.999989 | 5.48397e-06 | 0.999989 |
| C2H2+PhCH2                    | 4.21345e-06 | 0.999993 | 4.21345e-06 | 0.999993 |
| PhCCCH3+H                     | 3.20659e-06 | 0.999996 | 3.20659e-06 | 0.999996 |
| Ph+MeAc                       | 2.59787e-06 | 0.999999 | 2.59787e-06 | 0.999999 |
| rad67                         | 7.68574e-07 | 0.999999 | 7.68574e-07 | 0.999999 |
| rad35                         | 3.33630e-07 | 1.000000 | 3.33630e-07 | 1.000000 |
| Ph+Allene                     | 2.69811e-07 | 1.000000 | 2.69811e-07 | 1.000000 |
| PhCH2CCH+H                    | 3.67547e-08 | 1.000000 | 3.67547e-08 | 1.000000 |
| PAH7+H                        | 3.22854e-08 | 1.000000 | 3.22854e-08 | 1.000000 |
| rad39                         | 9.11041e-09 | 1.000000 | 9.11041e-09 | 1.000000 |
| rad37                         | 8.68150e-09 | 1.000000 | 8.68150e-09 | 1.000000 |
| rad30                         | 6.31839e-09 | 1.000000 | 6.31839e-09 | 1.000000 |
| Benzene+cycloprop-1-enylidene | 6.40297e-10 | 1.000000 | 6.40297e-10 | 1.000000 |
| PAH9+H                        | 4.75289e-10 | 1.000000 | 4.75289e-10 | 1.000000 |
| rad38                         | 2.13349e-10 | 1.000000 | 2.13349e-10 | 1.000000 |
| rad60syn                      | 3.33085e-11 | 1.000000 | 3.33085e-11 | 1.000000 |
| PAH10+CH3                     | 2.05093e-11 | 1.000000 | 2.05093e-11 | 1.000000 |

|                |             |         |             |         |
|----------------|-------------|---------|-------------|---------|
| PAH3+H         | 1.69430e-11 | 1.00000 | 1.69430e-11 | 1.00000 |
| rad60anti      | 1.65480e-11 | 1.00000 | 1.65480e-11 | 1.00000 |
| rad46          | 1.34951e-11 | 1.00000 | 1.34951e-11 | 1.00000 |
| PhcycC3H3_A+H  | 7.80973e-12 | 1.00000 | 7.80973e-12 | 1.00000 |
| rad59          | 3.38399e-12 | 1.00000 | 3.38399e-12 | 1.00000 |
| rad43          | 8.17739e-13 | 1.00000 | 8.17739e-13 | 1.00000 |
| rad54          | 7.51489e-13 | 1.00000 | 7.51489e-13 | 1.00000 |
| rad62          | 1.81219e-13 | 1.00000 | 1.81219e-13 | 1.00000 |
| rad50          | 1.26510e-13 | 1.00000 | 1.26510e-13 | 1.00000 |
| Phenyl+cycC3H4 | 5.71891e-14 | 1.00000 | 0.00000     | 1.00000 |
| rad70          | 1.72136e-14 | 1.00000 | 1.72136e-14 | 1.00000 |
| PhcycC3H3_B+H  | 1.54798e-14 | 1.00000 | 1.54798e-14 | 1.00000 |
| rad55          | 7.63185e-15 | 1.00000 | 7.63185e-15 | 1.00000 |
| PAH1+H         | 5.77882e-15 | 1.00000 | 5.77882e-15 | 1.00000 |
| rad52          | 1.04911e-15 | 1.00000 | 1.04911e-15 | 1.00000 |
| rad58          | 4.91780e-16 | 1.00000 | 4.91780e-16 | 1.00000 |
| rad51          | 3.54200e-16 | 1.00000 | 3.54200e-16 | 1.00000 |
| rad34          | 3.15090e-16 | 1.00000 | 3.15090e-16 | 1.00000 |
| rad41          | 6.58200e-17 | 1.00000 | 6.58200e-17 | 1.00000 |
| rad42          | 4.80835e-17 | 1.00000 | 4.80835e-17 | 1.00000 |
| rad65          | 8.16155e-18 | 1.00000 | 8.16155e-18 | 1.00000 |
| rad53          | 1.76029e-19 | 1.00000 | 1.76029e-19 | 1.00000 |
| rad64          | 2.96507e-20 | 1.00000 | 2.96507e-20 | 1.00000 |
| rad61          | 1.40406e-21 | 1.00000 | 1.40406e-21 | 1.00000 |
| rad56          | 5.46511e-23 | 1.00000 | 5.46511e-23 | 1.00000 |
| rad68syn       | 4.98610e-24 | 1.00000 | 4.98610e-24 | 1.00000 |
| rad68anti      | 3.92930e-24 | 1.00000 | 3.92930e-24 | 1.00000 |
| rad6           | 1.08753e-24 | 1.00000 | 1.08753e-24 | 1.00000 |
| rad40syn       | 5.38958e-27 | 1.00000 | 5.38958e-27 | 1.00000 |
| rad40anti      | 4.30388e-27 | 1.00000 | 4.30388e-27 | 1.00000 |
| rad28          | 1.67081e-27 | 1.00000 | 1.67081e-27 | 1.00000 |
| rad2           | 5.22328e-28 | 1.00000 | 5.22328e-28 | 1.00000 |
| rad26          | 4.36252e-28 | 1.00000 | 4.36252e-28 | 1.00000 |
| rad73          | 2.64776e-28 | 1.00000 | 2.64776e-28 | 1.00000 |
| PAH8+H         | 1.67788e-28 | 1.00000 | 1.67788e-28 | 1.00000 |
| rad7           | 8.02585e-29 | 1.00000 | 8.02585e-29 | 1.00000 |
| rad1           | 3.46516e-29 | 1.00000 | 3.46516e-29 | 1.00000 |
| rad10          | 2.68515e-29 | 1.00000 | 2.68515e-29 | 1.00000 |
| rad11          | 1.97863e-29 | 1.00000 | 1.97863e-29 | 1.00000 |
| rad47          | 6.30365e-30 | 1.00000 | 6.30365e-30 | 1.00000 |
| rad3           | 3.22604e-30 | 1.00000 | 3.22604e-30 | 1.00000 |
| rad4           | 1.64931e-30 | 1.00000 | 1.64931e-30 | 1.00000 |
| rad19anti      | 8.70033e-31 | 1.00000 | 8.70033e-31 | 1.00000 |
| rad13          | 4.48321e-31 | 1.00000 | 4.48321e-31 | 1.00000 |
| rad9           | 1.67239e-31 | 1.00000 | 1.67239e-31 | 1.00000 |
| rad71          | 1.66935e-31 | 1.00000 | 1.66935e-31 | 1.00000 |
| rad14          | 3.12754e-33 | 1.00000 | 3.12754e-33 | 1.00000 |
| rad25          | 1.70812e-33 | 1.00000 | 1.70812e-33 | 1.00000 |
| rad33          | 8.54220e-34 | 1.00000 | 8.54220e-34 | 1.00000 |
| rad27          | 7.02813e-34 | 1.00000 | 7.02813e-34 | 1.00000 |
| rad15          | 7.37510e-35 | 1.00000 | 7.37510e-35 | 1.00000 |
| rad5           | 3.02860e-35 | 1.00000 | 3.02860e-35 | 1.00000 |
| rad31          | 7.90996e-36 | 1.00000 | 7.90996e-36 | 1.00000 |
| rad23          | 1.05809e-38 | 1.00000 | 1.05809e-38 | 1.00000 |
| rad20          | 4.35710e-39 | 1.00000 | 4.35710e-39 | 1.00000 |
| rad21          | 3.32834e-39 | 1.00000 | 3.32834e-39 | 1.00000 |
| rad19syn       | 8.89196e-40 | 1.00000 | 8.89196e-40 | 1.00000 |
| rad12          | 8.81119e-40 | 1.00000 | 8.81119e-40 | 1.00000 |
| rad45          | 7.45408e-41 | 1.00000 | 7.45408e-41 | 1.00000 |
| rad22          | 2.51419e-41 | 1.00000 | 2.51419e-41 | 1.00000 |
| rad18          | 1.86940e-41 | 1.00000 | 1.86940e-41 | 1.00000 |
| rad36          | 4.59500e-42 | 1.00000 | 4.59500e-42 | 1.00000 |
| rad24          | 2.22817e-45 | 1.00000 | 2.22817e-45 | 1.00000 |
| rad8           | 3.08703e-62 | 1.00000 | 3.08703e-62 | 1.00000 |

0.100000000E-03 Pa, 180.000000 K

| Rate constant             | True (fraction)        | Effective (fraction)   |
|---------------------------|------------------------|------------------------|
| Total                     | 1.12884e-14 (1.00)     | 1.12884e-14 (1.00)     |
| Formation of rad19        | 1.12881e-14 (1.000)    | 1.12881e-14 (1.000)    |
| H-abstraction to cyc2enyl | 2.75916e-19 (2.44e-05) | 2.75916e-19 (2.44e-05) |
| H-abstraction to cyc1enyl | 2.39955e-23 (2.13e-09) | 2.39955e-23 (2.13e-09) |

| species                       | PYtrue      | Cumul    | PYeffective | Cumul    |
|-------------------------------|-------------|----------|-------------|----------|
| Indene+H                      | 0.999638    | 0.999638 | 0.999638    | 0.999638 |
| PhCHCCH2+H                    | 0.000320238 | 0.999958 | 0.000320238 | 0.999958 |
| Benzene+cycloprop-2-enylidene | 2.44424e-05 | 0.999982 | 2.44424e-05 | 0.999982 |
| PhCCH+CH3                     | 5.69151e-06 | 0.999988 | 5.69151e-06 | 0.999988 |

|                               |             |          |             |          |
|-------------------------------|-------------|----------|-------------|----------|
| C2H2+PhCH2                    | 4.41181e-06 | 0.999992 | 4.41181e-06 | 0.999992 |
| PhCCCH3+H                     | 3.34271e-06 | 0.999996 | 3.34271e-06 | 0.999996 |
| Ph+MeAc                       | 2.73412e-06 | 0.999998 | 2.73412e-06 | 0.999998 |
| rad67                         | 8.07010e-07 | 0.999999 | 8.07010e-07 | 0.999999 |
| rad35                         | 3.49603e-07 | 1.000000 | 3.49603e-07 | 1.000000 |
| Ph+Allene                     | 2.89680e-07 | 1.000000 | 2.89680e-07 | 1.000000 |
| PhCH2CCH+H                    | 3.99479e-08 | 1.000000 | 3.99479e-08 | 1.000000 |
| PAH7+H                        | 3.42851e-08 | 1.000000 | 3.42851e-08 | 1.000000 |
| rad39                         | 9.67347e-09 | 1.000000 | 9.67347e-09 | 1.000000 |
| rad37                         | 9.25288e-09 | 1.000000 | 9.25288e-09 | 1.000000 |
| rad30                         | 6.63279e-09 | 1.000000 | 6.63279e-09 | 1.000000 |
| Benzene+cycloprop-1-enylidene | 2.12567e-09 | 1.000000 | 2.12567e-09 | 1.000000 |
| PAH9+H                        | 5.06924e-10 | 1.000000 | 5.06924e-10 | 1.000000 |
| rad38                         | 2.29253e-10 | 1.000000 | 2.29253e-10 | 1.000000 |
| rad60syn                      | 3.57045e-11 | 1.000000 | 3.57045e-11 | 1.000000 |
| PAH10+CH3                     | 2.35101e-11 | 1.000000 | 2.35101e-11 | 1.000000 |
| PAH3+H                        | 1.86591e-11 | 1.000000 | 1.86591e-11 | 1.000000 |
| rad60anti                     | 1.77718e-11 | 1.000000 | 1.77718e-11 | 1.000000 |
| rad46                         | 1.45758e-11 | 1.000000 | 1.45758e-11 | 1.000000 |
| PhcycC3H3_A+H                 | 1.01655e-11 | 1.000000 | 1.01655e-11 | 1.000000 |
| rad59                         | 3.71051e-12 | 1.000000 | 3.71051e-12 | 1.000000 |
| rad43                         | 9.19877e-13 | 1.000000 | 9.19877e-13 | 1.000000 |
| rad54                         | 8.60497e-13 | 1.000000 | 8.60497e-13 | 1.000000 |
| rad62                         | 2.04290e-13 | 1.000000 | 2.04290e-13 | 1.000000 |
| rad50                         | 1.42138e-13 | 1.000000 | 1.42138e-13 | 1.000000 |
| Phenyl+cycC3H4                | 8.44565e-14 | 1.000000 | 0.00000     | 1.000000 |
| PhcycC3H3_B+H                 | 2.84776e-14 | 1.000000 | 2.84776e-14 | 1.000000 |
| rad70                         | 2.05549e-14 | 1.000000 | 2.05549e-14 | 1.000000 |
| rad55                         | 9.11546e-15 | 1.000000 | 9.11546e-15 | 1.000000 |
| PAH1+H                        | 7.32377e-15 | 1.000000 | 7.32377e-15 | 1.000000 |
| rad52                         | 1.21496e-15 | 1.000000 | 1.21496e-15 | 1.000000 |
| rad58                         | 5.98633e-16 | 1.000000 | 5.98633e-16 | 1.000000 |
| rad51                         | 4.25474e-16 | 1.000000 | 4.25474e-16 | 1.000000 |
| rad34                         | 4.00844e-16 | 1.000000 | 4.00844e-16 | 1.000000 |
| rad41                         | 8.74640e-17 | 1.000000 | 8.74640e-17 | 1.000000 |
| rad42                         | 6.22150e-17 | 1.000000 | 6.22150e-17 | 1.000000 |
| rad65                         | 9.95924e-18 | 1.000000 | 9.95924e-18 | 1.000000 |
| rad53                         | 3.16140e-19 | 1.000000 | 3.16140e-19 | 1.000000 |
| rad64                         | 5.99908e-20 | 1.000000 | 5.99908e-20 | 1.000000 |
| rad61                         | 4.00801e-21 | 1.000000 | 4.00801e-21 | 1.000000 |
| rad56                         | 1.79224e-22 | 1.000000 | 1.79224e-22 | 1.000000 |
| rad68syn                      | 1.75238e-23 | 1.000000 | 1.75238e-23 | 1.000000 |
| rad68anti                     | 1.37245e-23 | 1.000000 | 1.37245e-23 | 1.000000 |
| rad6                          | 9.16153e-25 | 1.000000 | 9.16153e-25 | 1.000000 |
| rad40syn                      | 3.05802e-26 | 1.000000 | 3.05802e-26 | 1.000000 |
| rad40anti                     | 2.44831e-26 | 1.000000 | 2.44831e-26 | 1.000000 |
| rad28                         | 1.40865e-27 | 1.000000 | 1.40865e-27 | 1.000000 |
| rad73                         | 1.39312e-27 | 1.000000 | 1.39312e-27 | 1.000000 |
| PAH8+H                        | 1.32188e-27 | 1.000000 | 1.32188e-27 | 1.000000 |
| rad2                          | 4.72551e-28 | 1.000000 | 4.72551e-28 | 1.000000 |
| rad26                         | 4.04192e-28 | 1.000000 | 4.04192e-28 | 1.000000 |
| rad7                          | 6.77323e-29 | 1.000000 | 6.77323e-29 | 1.000000 |
| rad1                          | 3.15528e-29 | 1.000000 | 3.15528e-29 | 1.000000 |
| rad10                         | 2.43414e-29 | 1.000000 | 2.43414e-29 | 1.000000 |
| rad11                         | 1.67036e-29 | 1.000000 | 1.67036e-29 | 1.000000 |
| rad47                         | 6.50539e-30 | 1.000000 | 6.50539e-30 | 1.000000 |
| rad3                          | 2.87485e-30 | 1.000000 | 2.87485e-30 | 1.000000 |
| rad19anti                     | 2.31130e-30 | 1.000000 | 2.31130e-30 | 1.000000 |
| rad71                         | 1.48898e-30 | 1.000000 | 1.48898e-30 | 1.000000 |
| rad4                          | 1.47231e-30 | 1.000000 | 1.47231e-30 | 1.000000 |
| rad13                         | 3.78980e-31 | 1.000000 | 3.78980e-31 | 1.000000 |
| rad9                          | 1.97051e-31 | 1.000000 | 1.97051e-31 | 1.000000 |
| rad14                         | 3.10507e-33 | 1.000000 | 3.10507e-33 | 1.000000 |
| rad25                         | 1.67992e-33 | 1.000000 | 1.67992e-33 | 1.000000 |
| rad33                         | 7.23281e-34 | 1.000000 | 7.23281e-34 | 1.000000 |
| rad27                         | 6.86542e-34 | 1.000000 | 6.86542e-34 | 1.000000 |
| rad15                         | 8.70684e-35 | 1.000000 | 8.70684e-35 | 1.000000 |
| rad5                          | 2.72532e-35 | 1.000000 | 2.72532e-35 | 1.000000 |
| rad31                         | 1.69519e-35 | 1.000000 | 1.69519e-35 | 1.000000 |
| rad23                         | 1.46182e-38 | 1.000000 | 1.46182e-38 | 1.000000 |
| rad20                         | 4.03734e-39 | 1.000000 | 4.03734e-39 | 1.000000 |
| rad21                         | 3.10512e-39 | 1.000000 | 3.10512e-39 | 1.000000 |
| rad19syn                      | 2.57212e-39 | 1.000000 | 2.57212e-39 | 1.000000 |
| rad12                         | 1.05749e-39 | 1.000000 | 1.05749e-39 | 1.000000 |
| rad45                         | 1.02898e-40 | 1.000000 | 1.02898e-40 | 1.000000 |
| rad22                         | 2.21325e-41 | 1.000000 | 2.21325e-41 | 1.000000 |
| rad18                         | 1.71832e-41 | 1.000000 | 1.71832e-41 | 1.000000 |
| rad36                         | 6.35627e-42 | 1.000000 | 6.35627e-42 | 1.000000 |
| rad24                         | 3.03072e-45 | 1.000000 | 3.03072e-45 | 1.000000 |
| rad8                          | 4.95709e-62 | 1.000000 | 4.95709e-62 | 1.000000 |

0.100000000E-03 Pa, 190.000000 K

=====

| Rate constant             | True (fraction)        | Effective (fraction)   |
|---------------------------|------------------------|------------------------|
| Total                     | 1.32132e-14 (1.00 )    | 1.32132e-14 (1.00 )    |
| Formation of rad19        | 1.32126e-14 (1.000 )   | 1.32126e-14 (1.000 )   |
| H-abstraction to cyc2enyl | 5.62053e-19 (4.25e-05) | 5.62053e-19 (4.25e-05) |
| H-abstraction to cyclenyl | 8.18073e-23 (6.19e-09) | 8.18073e-23 (6.19e-09) |

| species                       | PYtrue      | Cumul    | PYeffective | Cumul    |
|-------------------------------|-------------|----------|-------------|----------|
| Indene+H                      | 0.999606    | 0.999606 | 0.999606    | 0.999606 |
| PhCHCCH2+H                    | 0.000332293 | 0.999939 | 0.000332293 | 0.999939 |
| Benzene+cycloprop-2-enylidene | 4.25373e-05 | 0.999981 | 4.25373e-05 | 0.999981 |
| PhCCH+CH3                     | 5.91706e-06 | 0.999987 | 5.91706e-06 | 0.999987 |
| C2H2+PhCH2                    | 4.63021e-06 | 0.999992 | 4.63021e-06 | 0.999992 |
| PhCCCH3+H                     | 3.49167e-06 | 0.999995 | 3.49167e-06 | 0.999995 |
| Ph+MeAc                       | 2.88479e-06 | 0.999998 | 2.88479e-06 | 0.999998 |
| rad67                         | 8.49457e-07 | 0.999999 | 8.49457e-07 | 0.999999 |
| rad35                         | 3.67207e-07 | 0.999999 | 3.67207e-07 | 0.999999 |
| Ph+Allene                     | 3.12193e-07 | 1.000000 | 3.12193e-07 | 1.000000 |
| PhCH2CCH+H                    | 4.36144e-08 | 1.000000 | 4.36144e-08 | 1.000000 |
| PAH7+H                        | 3.65225e-08 | 1.000000 | 3.65225e-08 | 1.000000 |
| rad39                         | 1.03031e-08 | 1.000000 | 1.03031e-08 | 1.000000 |
| rad37                         | 9.89463e-09 | 1.000000 | 9.89463e-09 | 1.000000 |
| rad30                         | 6.98058e-09 | 1.000000 | 6.98058e-09 | 1.000000 |
| Benzene+cycloprop-1-enylidene | 6.19133e-09 | 1.000000 | 6.19133e-09 | 1.000000 |
| PAH9+H                        | 5.42585e-10 | 1.000000 | 5.42585e-10 | 1.000000 |
| rad38                         | 2.47357e-10 | 1.000000 | 2.47357e-10 | 1.000000 |
| rad60syn                      | 3.84182e-11 | 1.000000 | 3.84182e-11 | 1.000000 |
| PAH10+CH3                     | 2.71458e-11 | 1.000000 | 2.71458e-11 | 1.000000 |
| PAH3+H                        | 2.06609e-11 | 1.000000 | 2.06609e-11 | 1.000000 |
| rad60anti                     | 1.91607e-11 | 1.000000 | 1.91607e-11 | 1.000000 |
| rad46                         | 1.58117e-11 | 1.000000 | 1.58117e-11 | 1.000000 |
| PhcycC3H3_A+H                 | 1.33135e-11 | 1.000000 | 1.33135e-11 | 1.000000 |
| rad59                         | 4.08945e-12 | 1.000000 | 4.08945e-12 | 1.000000 |
| rad43                         | 1.04096e-12 | 1.000000 | 1.04096e-12 | 1.000000 |
| rad54                         | 9.92525e-13 | 1.000000 | 9.92525e-13 | 1.000000 |
| rad62                         | 2.31629e-13 | 1.000000 | 2.31629e-13 | 1.000000 |
| rad50                         | 1.60798e-13 | 1.000000 | 1.60798e-13 | 1.000000 |
| Phenyl+cycC3H4                | 1.24603e-13 | 1.000000 | 0.000000    | 1.000000 |
| PhcycC3H3_B+H                 | 5.08976e-14 | 1.000000 | 5.08976e-14 | 1.000000 |
| rad70                         | 2.47651e-14 | 1.000000 | 2.47651e-14 | 1.000000 |
| rad55                         | 1.09837e-14 | 1.000000 | 1.09837e-14 | 1.000000 |
| PAH1+H                        | 9.37338e-15 | 1.000000 | 9.37338e-15 | 1.000000 |
| rad52                         | 1.41927e-15 | 1.000000 | 1.41927e-15 | 1.000000 |
| rad58                         | 7.35871e-16 | 1.000000 | 7.35871e-16 | 1.000000 |
| rad51                         | 5.16501e-16 | 1.000000 | 5.16501e-16 | 1.000000 |
| rad34                         | 5.15034e-16 | 1.000000 | 5.15034e-16 | 1.000000 |
| rad41                         | 1.17041e-16 | 1.000000 | 1.17041e-16 | 1.000000 |
| rad42                         | 8.10494e-17 | 1.000000 | 8.10494e-17 | 1.000000 |
| rad65                         | 1.22859e-17 | 1.000000 | 1.22859e-17 | 1.000000 |
| rad53                         | 5.56204e-19 | 1.000000 | 5.56204e-19 | 1.000000 |
| rad64                         | 1.17039e-19 | 1.000000 | 1.17039e-19 | 1.000000 |
| rad61                         | 1.05588e-20 | 1.000000 | 1.05588e-20 | 1.000000 |
| rad56                         | 5.33223e-22 | 1.000000 | 5.33223e-22 | 1.000000 |
| rad68syn                      | 5.52665e-23 | 1.000000 | 5.52665e-23 | 1.000000 |
| rad68anti                     | 4.30015e-23 | 1.000000 | 4.30015e-23 | 1.000000 |
| rad6                          | 8.01716e-25 | 1.000000 | 8.01716e-25 | 1.000000 |
| rad40syn                      | 1.47212e-25 | 1.000000 | 1.47212e-25 | 1.000000 |
| rad40anti                     | 1.18054e-25 | 1.000000 | 1.18054e-25 | 1.000000 |
| PAH8+H                        | 8.53885e-27 | 1.000000 | 8.53885e-27 | 1.000000 |
| rad73                         | 6.34249e-27 | 1.000000 | 6.34249e-27 | 1.000000 |
| rad28                         | 1.22104e-27 | 1.000000 | 1.22104e-27 | 1.000000 |
| rad2                          | 4.62846e-28 | 1.000000 | 4.62846e-28 | 1.000000 |
| rad26                         | 3.93173e-28 | 1.000000 | 3.93173e-28 | 1.000000 |
| rad7                          | 5.93836e-29 | 1.000000 | 5.93836e-29 | 1.000000 |
| rad1                          | 3.11229e-29 | 1.000000 | 3.11229e-29 | 1.000000 |
| rad10                         | 2.38907e-29 | 1.000000 | 2.38907e-29 | 1.000000 |
| rad11                         | 1.46498e-29 | 1.000000 | 1.46498e-29 | 1.000000 |
| rad71                         | 1.07846e-29 | 1.000000 | 1.07846e-29 | 1.000000 |
| rad47                         | 6.79827e-30 | 1.000000 | 6.79827e-30 | 1.000000 |
| rad19anti                     | 6.45039e-30 | 1.000000 | 6.45039e-30 | 1.000000 |
| rad3                          | 2.75359e-30 | 1.000000 | 2.75359e-30 | 1.000000 |
| rad4                          | 1.41289e-30 | 1.000000 | 1.41289e-30 | 1.000000 |
| rad13                         | 3.32834e-31 | 1.000000 | 3.32834e-31 | 1.000000 |
| rad9                          | 2.42493e-31 | 1.000000 | 2.42493e-31 | 1.000000 |
| rad14                         | 3.15579e-33 | 1.000000 | 3.15579e-33 | 1.000000 |
| rad25                         | 1.68054e-33 | 1.000000 | 1.68054e-33 | 1.000000 |

|          |             |          |             |          |
|----------|-------------|----------|-------------|----------|
| rad27    | 7.04600e-34 | 1.000000 | 7.04600e-34 | 1.000000 |
| rad33    | 6.36313e-34 | 1.000000 | 6.36313e-34 | 1.000000 |
| rad15    | 1.07363e-34 | 1.000000 | 1.07363e-34 | 1.000000 |
| rad31    | 3.79991e-35 | 1.000000 | 3.79991e-35 | 1.000000 |
| rad5     | 2.46910e-35 | 1.000000 | 2.46910e-35 | 1.000000 |
| rad23    | 2.62551e-38 | 1.000000 | 2.62551e-38 | 1.000000 |
| rad19syn | 7.83212e-39 | 1.000000 | 7.83212e-39 | 1.000000 |
| rad20    | 3.90771e-39 | 1.000000 | 3.90771e-39 | 1.000000 |
| rad21    | 3.02868e-39 | 1.000000 | 3.02868e-39 | 1.000000 |
| rad12    | 1.32846e-39 | 1.000000 | 1.32846e-39 | 1.000000 |
| rad45    | 1.84784e-40 | 1.000000 | 1.84784e-40 | 1.000000 |
| rad22    | 2.14145e-41 | 1.000000 | 2.14145e-41 | 1.000000 |
| rad18    | 1.64186e-41 | 1.000000 | 1.64186e-41 | 1.000000 |
| rad36    | 1.14423e-41 | 1.000000 | 1.14423e-41 | 1.000000 |
| rad24    | 4.24391e-45 | 1.000000 | 4.24391e-45 | 1.000000 |
| rad8     | 8.12803e-62 | 1.000000 | 8.12803e-62 | 1.000000 |

0.100000000E-03 Pa, 200.000000 K

```

=====
Rate constant          | True (fraction)          Effective (fraction)
-----
Total                  | 1.52621e-14 (1.00   ) 1.52621e-14 (1.00   )
Formation of rad19    | 1.52610e-14 (1.000  ) 1.52610e-14 (1.000  )
H-abstraction to cyc2enyl | 1.06427e-18 (6.97e-05) 1.06427e-18 (6.97e-05)
H-abstraction to cyclenyl | 2.46309e-22 (1.61e-08) 2.46309e-22 (1.61e-08)

```

| species                       | PYtrue      | Cumul    | PYeffective | Cumul    |
|-------------------------------|-------------|----------|-------------|----------|
| Indene+H                      | 0.999565    | 0.999565 | 0.999565    | 0.999565 |
| PhCHCCH2+H                    | 0.000345433 | 0.999911 | 0.000345433 | 0.999911 |
| Benzene+cycloprop-2-enylidene | 6.97330e-05 | 0.999980 | 6.97330e-05 | 0.999980 |
| PhCCH+CH3                     | 6.16243e-06 | 0.999987 | 6.16243e-06 | 0.999987 |
| C2H2+PhCH2                    | 4.87108e-06 | 0.999991 | 4.87108e-06 | 0.999991 |
| PhCCCH3+H                     | 3.65492e-06 | 0.999995 | 3.65492e-06 | 0.999995 |
| Ph+MeAc                       | 3.05169e-06 | 0.999998 | 3.05169e-06 | 0.999998 |
| rad67                         | 8.96413e-07 | 0.999999 | 8.96413e-07 | 0.999999 |
| rad35                         | 3.86641e-07 | 0.999999 | 3.86641e-07 | 0.999999 |
| Ph+Allene                     | 3.37772e-07 | 1.000000 | 3.37772e-07 | 1.000000 |
| PhCH2CCH+H                    | 4.78382e-08 | 1.000000 | 4.78382e-08 | 1.000000 |
| PAH7+H                        | 3.90319e-08 | 1.000000 | 3.90319e-08 | 1.000000 |
| Benzene+cycloprop-1-enylidene | 1.61386e-08 | 1.000000 | 1.61386e-08 | 1.000000 |
| rad39                         | 1.10084e-08 | 1.000000 | 1.10084e-08 | 1.000000 |
| rad37                         | 1.06172e-08 | 1.000000 | 1.06172e-08 | 1.000000 |
| rad30                         | 7.36602e-09 | 1.000000 | 7.36602e-09 | 1.000000 |
| PAH9+H                        | 5.82898e-10 | 1.000000 | 5.82898e-10 | 1.000000 |
| rad38                         | 2.68034e-10 | 1.000000 | 2.68034e-10 | 1.000000 |
| rad60syn                      | 4.15003e-11 | 1.000000 | 4.15003e-11 | 1.000000 |
| PAH10+CH3                     | 3.15723e-11 | 1.000000 | 3.15723e-11 | 1.000000 |
| PAH3+H                        | 2.30054e-11 | 1.000000 | 2.30054e-11 | 1.000000 |
| rad60anti                     | 2.07415e-11 | 1.000000 | 2.07415e-11 | 1.000000 |
| PhcycC3H3_A+H                 | 1.75314e-11 | 1.000000 | 1.75314e-11 | 1.000000 |
| rad46                         | 1.72299e-11 | 1.000000 | 1.72299e-11 | 1.000000 |
| rad59                         | 4.53087e-12 | 1.000000 | 4.53087e-12 | 1.000000 |
| rad43                         | 1.18504e-12 | 1.000000 | 1.18504e-12 | 1.000000 |
| rad54                         | 1.15322e-12 | 1.000000 | 1.15322e-12 | 1.000000 |
| rad62                         | 2.64142e-13 | 1.000000 | 2.64142e-13 | 1.000000 |
| Phenyl+cycC3H4                | 1.83626e-13 | 1.000000 | 0.000000    | 1.000000 |
| rad50                         | 1.83196e-13 | 1.000000 | 1.83196e-13 | 1.000000 |
| PhcycC3H3_B+H                 | 8.87690e-14 | 1.000000 | 8.87690e-14 | 1.000000 |
| rad70                         | 3.01002e-14 | 1.000000 | 3.01002e-14 | 1.000000 |
| rad55                         | 1.33492e-14 | 1.000000 | 1.33492e-14 | 1.000000 |
| PAH1+H                        | 1.21075e-14 | 1.000000 | 1.21075e-14 | 1.000000 |
| rad52                         | 1.67255e-15 | 1.000000 | 1.67255e-15 | 1.000000 |
| rad58                         | 9.13217e-16 | 1.000000 | 9.13217e-16 | 1.000000 |
| rad34                         | 6.67941e-16 | 1.000000 | 6.67941e-16 | 1.000000 |
| rad51                         | 6.33605e-16 | 1.000000 | 6.33605e-16 | 1.000000 |
| rad41                         | 1.57584e-16 | 1.000000 | 1.57584e-16 | 1.000000 |
| rad42                         | 1.06226e-16 | 1.000000 | 1.06226e-16 | 1.000000 |
| rad65                         | 1.53190e-17 | 1.000000 | 1.53190e-17 | 1.000000 |
| rad53                         | 9.61952e-19 | 1.000000 | 9.61952e-19 | 1.000000 |
| rad64                         | 2.21490e-19 | 1.000000 | 2.21490e-19 | 1.000000 |
| rad61                         | 2.60102e-20 | 1.000000 | 2.60102e-20 | 1.000000 |
| rad56                         | 1.46278e-21 | 1.000000 | 1.46278e-21 | 1.000000 |
| rad68syn                      | 1.59260e-22 | 1.000000 | 1.59260e-22 | 1.000000 |
| rad68anti                     | 1.23073e-22 | 1.000000 | 1.23073e-22 | 1.000000 |
| rad6                          | 7.36801e-25 | 1.000000 | 7.36801e-25 | 1.000000 |
| rad40syn                      | 6.17076e-25 | 1.000000 | 6.17076e-25 | 1.000000 |
| rad40anti                     | 4.95188e-25 | 1.000000 | 4.95188e-25 | 1.000000 |
| PAH8+H                        | 4.65851e-26 | 1.000000 | 4.65851e-26 | 1.000000 |
| rad73                         | 2.55581e-26 | 1.000000 | 2.55581e-26 | 1.000000 |

|           |             |          |             |          |
|-----------|-------------|----------|-------------|----------|
| rad28     | 1.09592e-27 | 1.000000 | 1.09592e-27 | 1.000000 |
| rad2      | 5.01487e-28 | 1.000000 | 5.01487e-28 | 1.000000 |
| rad26     | 4.06206e-28 | 1.000000 | 4.06206e-28 | 1.000000 |
| rad71     | 6.53611e-29 | 1.000000 | 6.53611e-29 | 1.000000 |
| rad7      | 5.46827e-29 | 1.000000 | 5.46827e-29 | 1.000000 |
| rad1      | 3.39799e-29 | 1.000000 | 3.39799e-29 | 1.000000 |
| rad10     | 2.59404e-29 | 1.000000 | 2.59404e-29 | 1.000000 |
| rad19anti | 1.88672e-29 | 1.000000 | 1.88672e-29 | 1.000000 |
| rad11     | 1.34953e-29 | 1.000000 | 1.34953e-29 | 1.000000 |
| rad47     | 7.19666e-30 | 1.000000 | 7.19666e-30 | 1.000000 |
| rad3      | 2.89711e-30 | 1.000000 | 2.89711e-30 | 1.000000 |
| rad4      | 1.48962e-30 | 1.000000 | 1.48962e-30 | 1.000000 |
| rad9      | 3.17543e-31 | 1.000000 | 3.17543e-31 | 1.000000 |
| rad13     | 3.07027e-31 | 1.000000 | 3.07027e-31 | 1.000000 |
| rad14     | 3.29383e-33 | 1.000000 | 3.29383e-33 | 1.000000 |
| rad25     | 1.70829e-33 | 1.000000 | 1.70829e-33 | 1.000000 |
| rad27     | 7.64895e-34 | 1.000000 | 7.64895e-34 | 1.000000 |
| rad33     | 5.88051e-34 | 1.000000 | 5.88051e-34 | 1.000000 |
| rad15     | 1.40885e-34 | 1.000000 | 1.40885e-34 | 1.000000 |
| rad31     | 8.90023e-35 | 1.000000 | 8.90023e-35 | 1.000000 |
| rad5      | 2.25019e-35 | 1.000000 | 2.25019e-35 | 1.000000 |
| rad23     | 5.82204e-38 | 1.000000 | 5.82204e-38 | 1.000000 |
| rad19syn  | 2.51002e-38 | 1.000000 | 2.51002e-38 | 1.000000 |
| rad20     | 3.98430e-39 | 1.000000 | 3.98430e-39 | 1.000000 |
| rad21     | 3.11385e-39 | 1.000000 | 3.11385e-39 | 1.000000 |
| rad12     | 1.77790e-39 | 1.000000 | 1.77790e-39 | 1.000000 |
| rad45     | 4.09999e-40 | 1.000000 | 4.09999e-40 | 1.000000 |
| rad36     | 2.54599e-41 | 1.000000 | 2.54599e-41 | 1.000000 |
| rad22     | 2.44478e-41 | 1.000000 | 2.44478e-41 | 1.000000 |
| rad18     | 1.64436e-41 | 1.000000 | 1.64436e-41 | 1.000000 |
| rad24     | 6.10349e-45 | 1.000000 | 6.10349e-45 | 1.000000 |
| rad8      | 1.36076e-61 | 1.000000 | 1.36076e-61 | 1.000000 |

0.100000000E-03 Pa, 210.000000 K

=====

| Rate constant             | True (fraction)        | Effective (fraction)   |
|---------------------------|------------------------|------------------------|
| Total                     | 1.74272e-14 (1.00 )    | 1.74272e-14 (1.00 )    |
| Formation of rad19        | 1.74253e-14 (1.000 )   | 1.74253e-14 (1.000 )   |
| H-abstraction to cyc2enyl | 1.89310e-18 (0.000109) | 1.89310e-18 (0.000109) |
| H-abstraction to cyclenyl | 6.66714e-22 (3.83e-08) | 6.66714e-22 (3.83e-08) |

| species                       | PYtrue      | Cumul    | PYeffective | Cumul    |
|-------------------------------|-------------|----------|-------------|----------|
| Indene+H                      | 0.999511    | 0.999511 | 0.999511    | 0.999511 |
| PhCHCCH2+H                    | 0.000359771 | 0.999871 | 0.000359771 | 0.999871 |
| Benzene+cycloprop-2-enylidene | 0.000108629 | 0.999980 | 0.000108629 | 0.999980 |
| PhCCH+CH3                     | 6.42953e-06 | 0.999986 | 6.42953e-06 | 0.999986 |
| C2H2+PhCH2                    | 5.13704e-06 | 0.999991 | 5.13704e-06 | 0.999991 |
| PhCCCH3+H                     | 3.83397e-06 | 0.999995 | 3.83397e-06 | 0.999995 |
| Ph+MeAc                       | 3.23681e-06 | 0.999998 | 3.23681e-06 | 0.999998 |
| rad67                         | 9.48433e-07 | 0.999999 | 9.48433e-07 | 0.999999 |
| rad35                         | 4.08123e-07 | 1.000000 | 4.08123e-07 | 1.000000 |
| Ph+Allene                     | 3.66904e-07 | 1.000000 | 3.66904e-07 | 1.000000 |
| PhCH2CCH+H                    | 5.27175e-08 | 1.000000 | 5.27175e-08 | 1.000000 |
| PAH7+H                        | 4.18513e-08 | 1.000000 | 4.18513e-08 | 1.000000 |
| Benzene+cycloprop-1-enylidene | 3.82571e-08 | 1.000000 | 3.82571e-08 | 1.000000 |
| rad39                         | 1.18002e-08 | 1.000000 | 1.18002e-08 | 1.000000 |
| rad37                         | 1.14322e-08 | 1.000000 | 1.14322e-08 | 1.000000 |
| rad30                         | 7.79385e-09 | 1.000000 | 7.79385e-09 | 1.000000 |
| PAH9+H                        | 6.28578e-10 | 1.000000 | 6.28578e-10 | 1.000000 |
| rad38                         | 2.91716e-10 | 1.000000 | 2.91716e-10 | 1.000000 |
| rad60syn                      | 4.50096e-11 | 1.000000 | 4.50096e-11 | 1.000000 |
| PAH10+CH3                     | 3.69847e-11 | 1.000000 | 3.69847e-11 | 1.000000 |
| PAH3+H                        | 2.57613e-11 | 1.000000 | 2.57613e-11 | 1.000000 |
| PhcycC3H3_A+H                 | 2.31914e-11 | 1.000000 | 2.31914e-11 | 1.000000 |
| rad60anti                     | 2.25454e-11 | 1.000000 | 2.25454e-11 | 1.000000 |
| rad46                         | 1.88619e-11 | 1.000000 | 1.88619e-11 | 1.000000 |
| rad59                         | 5.04686e-12 | 1.000000 | 5.04686e-12 | 1.000000 |
| rad43                         | 1.35708e-12 | 1.000000 | 1.35708e-12 | 1.000000 |
| rad54                         | 1.34966e-12 | 1.000000 | 1.34966e-12 | 1.000000 |
| rad62                         | 3.02920e-13 | 1.000000 | 3.02920e-13 | 1.000000 |
| Phenyl+cycC3H4                | 2.70226e-13 | 1.000000 | 0.000000    | 1.000000 |
| rad50                         | 2.10208e-13 | 1.000000 | 2.10208e-13 | 1.000000 |
| PhcycC3H3_B+H                 | 1.51586e-13 | 1.000000 | 1.51586e-13 | 1.000000 |
| rad70                         | 3.68938e-14 | 1.000000 | 3.68938e-14 | 1.000000 |
| rad55                         | 1.63584e-14 | 1.000000 | 1.63584e-14 | 1.000000 |
| PAH1+H                        | 1.57709e-14 | 1.000000 | 1.57709e-14 | 1.000000 |
| rad52                         | 1.98835e-15 | 1.000000 | 1.98835e-15 | 1.000000 |
| rad58                         | 1.14363e-15 | 1.000000 | 1.14363e-15 | 1.000000 |

|           |             |         |             |         |
|-----------|-------------|---------|-------------|---------|
| rad34     | 8.73645e-16 | 1.00000 | 8.73645e-16 | 1.00000 |
| rad51     | 7.85254e-16 | 1.00000 | 7.85254e-16 | 1.00000 |
| rad41     | 2.13280e-16 | 1.00000 | 2.13280e-16 | 1.00000 |
| rad42     | 1.39946e-16 | 1.00000 | 1.39946e-16 | 1.00000 |
| rad65     | 1.92987e-17 | 1.00000 | 1.92987e-17 | 1.00000 |
| rad53     | 1.63946e-18 | 1.00000 | 1.63946e-18 | 1.00000 |
| rad64     | 4.08406e-19 | 1.00000 | 4.08406e-19 | 1.00000 |
| rad61     | 6.05362e-20 | 1.00000 | 6.05362e-20 | 1.00000 |
| rad56     | 3.74741e-21 | 1.00000 | 3.74741e-21 | 1.00000 |
| rad68syn  | 4.25363e-22 | 1.00000 | 4.25363e-22 | 1.00000 |
| rad68anti | 3.26440e-22 | 1.00000 | 3.26440e-22 | 1.00000 |
| rad40syn  | 2.29907e-24 | 1.00000 | 2.29907e-24 | 1.00000 |
| rad40anti | 1.84461e-24 | 1.00000 | 1.84461e-24 | 1.00000 |
| rad6      | 7.21820e-25 | 1.00000 | 7.21820e-25 | 1.00000 |
| PAH8+H    | 2.19677e-25 | 1.00000 | 2.19677e-25 | 1.00000 |
| rad73     | 9.27899e-26 | 1.00000 | 9.27899e-26 | 1.00000 |
| rad28     | 1.02967e-27 | 1.00000 | 1.02967e-27 | 1.00000 |
| rad2      | 6.10632e-28 | 1.00000 | 6.10632e-28 | 1.00000 |
| rad26     | 4.50939e-28 | 1.00000 | 4.50939e-28 | 1.00000 |
| rad71     | 3.39170e-28 | 1.00000 | 3.39170e-28 | 1.00000 |
| rad19anti | 5.76813e-29 | 1.00000 | 5.76813e-29 | 1.00000 |
| rad7      | 5.36811e-29 | 1.00000 | 5.36811e-29 | 1.00000 |
| rad1      | 4.17202e-29 | 1.00000 | 4.17202e-29 | 1.00000 |
| rad10     | 3.16539e-29 | 1.00000 | 3.16539e-29 | 1.00000 |
| rad11     | 1.32535e-29 | 1.00000 | 1.32535e-29 | 1.00000 |
| rad47     | 7.72108e-30 | 1.00000 | 7.72108e-30 | 1.00000 |
| rad3      | 3.41176e-30 | 1.00000 | 3.41176e-30 | 1.00000 |
| rad4      | 1.75823e-30 | 1.00000 | 1.75823e-30 | 1.00000 |
| rad9      | 4.58248e-31 | 1.00000 | 4.58248e-31 | 1.00000 |
| rad13     | 3.01952e-31 | 1.00000 | 3.01952e-31 | 1.00000 |
| rad14     | 3.55034e-33 | 1.00000 | 3.55034e-33 | 1.00000 |
| rad25     | 1.76444e-33 | 1.00000 | 1.76444e-33 | 1.00000 |
| rad27     | 8.85598e-34 | 1.00000 | 8.85598e-34 | 1.00000 |
| rad33     | 5.79452e-34 | 1.00000 | 5.79452e-34 | 1.00000 |
| rad31     | 2.17585e-34 | 1.00000 | 2.17585e-34 | 1.00000 |
| rad15     | 2.03750e-34 | 1.00000 | 2.03750e-34 | 1.00000 |
| rad5      | 2.06131e-35 | 1.00000 | 2.06131e-35 | 1.00000 |
| rad23     | 1.50135e-37 | 1.00000 | 1.50135e-37 | 1.00000 |
| rad19syn  | 8.46110e-38 | 1.00000 | 8.46110e-38 | 1.00000 |
| rad20     | 4.32408e-39 | 1.00000 | 4.32408e-39 | 1.00000 |
| rad21     | 3.40762e-39 | 1.00000 | 3.40762e-39 | 1.00000 |
| rad12     | 2.61730e-39 | 1.00000 | 2.61730e-39 | 1.00000 |
| rad45     | 1.05868e-39 | 1.00000 | 1.05868e-39 | 1.00000 |
| rad36     | 6.59551e-41 | 1.00000 | 6.59551e-41 | 1.00000 |
| rad22     | 3.62047e-41 | 1.00000 | 3.62047e-41 | 1.00000 |
| rad18     | 1.74605e-41 | 1.00000 | 1.74605e-41 | 1.00000 |
| rad24     | 9.00480e-45 | 1.00000 | 9.00480e-45 | 1.00000 |
| rad8      | 2.32612e-61 | 1.00000 | 2.32612e-61 | 1.00000 |

0.100000000E-03 Pa, 220.000000 K

| Rate constant             | True (fraction)        | Effective (fraction)   |
|---------------------------|------------------------|------------------------|
| Total                     | 1.97009e-14 (1.00)     | 1.97009e-14 (1.00)     |
| Formation of rad19        | 1.96977e-14 (1.000)    | 1.96977e-14 (1.000)    |
| H-abstraction to cyc2enyl | 3.19064e-18 (0.000162) | 3.19064e-18 (0.000162) |
| H-abstraction to cyclenyl | 1.64627e-21 (8.36e-08) | 1.64627e-21 (8.36e-08) |

| species                       | PYtrue      | Cumul    | PYeffective | Cumul    |
|-------------------------------|-------------|----------|-------------|----------|
| Indene+H                      | 0.999441    | 0.999441 | 0.999441    | 0.999441 |
| PhCHCCH2+H                    | 0.000375424 | 0.999816 | 0.000375424 | 0.999816 |
| Benzene+cycloprop-2-enylidene | 0.000161954 | 0.999978 | 0.000161954 | 0.999978 |
| PhCCH+CH3                     | 6.72039e-06 | 0.999985 | 6.72039e-06 | 0.999985 |
| C2H2+PhCH2                    | 5.43097e-06 | 0.999991 | 5.43097e-06 | 0.999991 |
| PhCCCH3+H                     | 4.03052e-06 | 0.999995 | 4.03052e-06 | 0.999995 |
| Ph+MeAc                       | 3.44236e-06 | 0.999998 | 3.44236e-06 | 0.999998 |
| rad67                         | 1.00612e-06 | 0.999999 | 1.00612e-06 | 0.999999 |
| rad35                         | 4.31891e-07 | 0.999999 | 4.31891e-07 | 0.999999 |
| Ph+Allene                     | 4.00148e-07 | 1.000000 | 4.00148e-07 | 1.000000 |
| Benzene+cycloprop-1-enylidene | 8.35632e-08 | 1.000000 | 8.35632e-08 | 1.000000 |
| PhCH2CCH+H                    | 5.83678e-08 | 1.000000 | 5.83678e-08 | 1.000000 |
| PAH7+H                        | 4.50235e-08 | 1.000000 | 4.50235e-08 | 1.000000 |
| rad39                         | 1.26901e-08 | 1.000000 | 1.26901e-08 | 1.000000 |
| rad37                         | 1.23532e-08 | 1.000000 | 1.23532e-08 | 1.000000 |
| rad30                         | 8.26933e-09 | 1.000000 | 8.26933e-09 | 1.000000 |
| PAH9+H                        | 6.80444e-10 | 1.000000 | 6.80444e-10 | 1.000000 |
| rad38                         | 3.18910e-10 | 1.000000 | 3.18910e-10 | 1.000000 |
| rad60syn                      | 4.90140e-11 | 1.000000 | 4.90140e-11 | 1.000000 |
| PAH10+CH3                     | 4.36275e-11 | 1.000000 | 4.36275e-11 | 1.000000 |

|                |             |         |             |         |
|----------------|-------------|---------|-------------|---------|
| PhcycC3H3_A+H  | 3.07931e-11 | 1.00000 | 3.07931e-11 | 1.00000 |
| PAH3+H         | 2.90111e-11 | 1.00000 | 2.90111e-11 | 1.00000 |
| rad60anti      | 2.46085e-11 | 1.00000 | 2.46085e-11 | 1.00000 |
| rad46          | 2.07450e-11 | 1.00000 | 2.07450e-11 | 1.00000 |
| rad59          | 5.65179e-12 | 1.00000 | 5.65179e-12 | 1.00000 |
| rad54          | 1.59072e-12 | 1.00000 | 1.59072e-12 | 1.00000 |
| rad43          | 1.56310e-12 | 1.00000 | 1.56310e-12 | 1.00000 |
| Phenyl+cycC3H4 | 3.96956e-13 | 1.00000 | 0.00000     | 1.00000 |
| rad62          | 3.49288e-13 | 1.00000 | 3.49288e-13 | 1.00000 |
| PhcycC3H3_B+H  | 2.54101e-13 | 1.00000 | 2.54101e-13 | 1.00000 |
| rad50          | 2.42926e-13 | 1.00000 | 2.42926e-13 | 1.00000 |
| rad70          | 4.55808e-14 | 1.00000 | 4.55808e-14 | 1.00000 |
| PAH1+H         | 2.06975e-14 | 1.00000 | 2.06975e-14 | 1.00000 |
| rad55          | 2.02020e-14 | 1.00000 | 2.02020e-14 | 1.00000 |
| rad52          | 2.38416e-15 | 1.00000 | 2.38416e-15 | 1.00000 |
| rad58          | 1.44437e-15 | 1.00000 | 1.44437e-15 | 1.00000 |
| rad34          | 1.15140e-15 | 1.00000 | 1.15140e-15 | 1.00000 |
| rad51          | 9.82801e-16 | 1.00000 | 9.82801e-16 | 1.00000 |
| rad41          | 2.89887e-16 | 1.00000 | 2.89887e-16 | 1.00000 |
| rad42          | 1.85166e-16 | 1.00000 | 1.85166e-16 | 1.00000 |
| rad65          | 2.45502e-17 | 1.00000 | 2.45502e-17 | 1.00000 |
| rad53          | 2.75825e-18 | 1.00000 | 2.75825e-18 | 1.00000 |
| rad64          | 7.36232e-19 | 1.00000 | 7.36232e-19 | 1.00000 |
| rad61          | 1.34204e-19 | 1.00000 | 1.34204e-19 | 1.00000 |
| rad56          | 9.05582e-21 | 1.00000 | 9.05582e-21 | 1.00000 |
| rad68syn       | 1.06496e-21 | 1.00000 | 1.06496e-21 | 1.00000 |
| rad68anti      | 8.11640e-22 | 1.00000 | 8.11640e-22 | 1.00000 |
| rad40syn       | 7.73817e-24 | 1.00000 | 7.73817e-24 | 1.00000 |
| rad40anti      | 6.20297e-24 | 1.00000 | 6.20297e-24 | 1.00000 |
| PAH8+H         | 9.11870e-25 | 1.00000 | 9.11870e-25 | 1.00000 |
| rad6           | 7.66830e-25 | 1.00000 | 7.66830e-25 | 1.00000 |
| rad73          | 3.07721e-25 | 1.00000 | 3.07721e-25 | 1.00000 |
| rad71          | 1.53451e-27 | 1.00000 | 1.53451e-27 | 1.00000 |
| rad28          | 1.02780e-27 | 1.00000 | 1.02780e-27 | 1.00000 |
| rad2           | 8.37205e-28 | 1.00000 | 8.37205e-28 | 1.00000 |
| rad26          | 5.42382e-28 | 1.00000 | 5.42382e-28 | 1.00000 |
| rad19anti      | 1.83737e-28 | 1.00000 | 1.83737e-28 | 1.00000 |
| rad1           | 5.77174e-29 | 1.00000 | 5.77174e-29 | 1.00000 |
| rad7           | 5.71505e-29 | 1.00000 | 5.71505e-29 | 1.00000 |
| rad10          | 4.34950e-29 | 1.00000 | 4.34950e-29 | 1.00000 |
| rad11          | 1.41162e-29 | 1.00000 | 1.41162e-29 | 1.00000 |
| rad47          | 8.40014e-30 | 1.00000 | 8.40014e-30 | 1.00000 |
| rad3           | 4.52816e-30 | 1.00000 | 4.52816e-30 | 1.00000 |
| rad4           | 2.33935e-30 | 1.00000 | 2.33935e-30 | 1.00000 |
| rad9           | 7.66772e-31 | 1.00000 | 7.66772e-31 | 1.00000 |
| rad13          | 3.22076e-31 | 1.00000 | 3.22076e-31 | 1.00000 |
| rad14          | 3.98437e-33 | 1.00000 | 3.98437e-33 | 1.00000 |
| rad25          | 1.85392e-33 | 1.00000 | 1.85392e-33 | 1.00000 |
| rad27          | 1.10267e-33 | 1.00000 | 1.10267e-33 | 1.00000 |
| rad33          | 6.19331e-34 | 1.00000 | 6.19331e-34 | 1.00000 |
| rad31          | 5.54472e-34 | 1.00000 | 5.54472e-34 | 1.00000 |
| rad15          | 3.41685e-34 | 1.00000 | 3.41685e-34 | 1.00000 |
| rad5           | 1.89687e-35 | 1.00000 | 1.89687e-35 | 1.00000 |
| rad23          | 4.33118e-37 | 1.00000 | 4.33118e-37 | 1.00000 |
| rad19syn       | 2.99699e-37 | 1.00000 | 2.99699e-37 | 1.00000 |
| rad20          | 5.05136e-39 | 1.00000 | 5.05136e-39 | 1.00000 |
| rad12          | 4.43751e-39 | 1.00000 | 4.43751e-39 | 1.00000 |
| rad21          | 4.01038e-39 | 1.00000 | 4.01038e-39 | 1.00000 |
| rad45          | 3.06117e-39 | 1.00000 | 3.06117e-39 | 1.00000 |
| rad36          | 1.91414e-40 | 1.00000 | 1.91414e-40 | 1.00000 |
| rad22          | 7.28793e-41 | 1.00000 | 7.28793e-41 | 1.00000 |
| rad18          | 1.99346e-41 | 1.00000 | 1.99346e-41 | 1.00000 |
| rad24          | 1.36312e-44 | 1.00000 | 1.36312e-44 | 1.00000 |
| rad8           | 4.06083e-61 | 1.00000 | 4.06083e-61 | 1.00000 |

0.100000000E-03 Pa, 230.000000 K

| Rate constant             | True (fraction)        | Effective (fraction)   |
|---------------------------|------------------------|------------------------|
| Total                     | 2.20761e-14 (1.00 )    | 2.20761e-14 (1.00 )    |
| Formation of rad19        | 2.20710e-14 (1.000 )   | 2.20710e-14 (1.000 )   |
| H-abstraction to cyc2enyl | 5.13155e-18 (0.000232) | 5.13155e-18 (0.000232) |
| H-abstraction to cyclenyl | 3.75316e-21 (1.70e-07) | 3.75316e-21 (1.70e-07) |

| species                       | PYtrue      | Cumul    | PYeffective | Cumul    |
|-------------------------------|-------------|----------|-------------|----------|
| Indene+H                      | 0.999352    | 0.999352 | 0.999352    | 0.999352 |
| PhCHCCH2+H                    | 0.000392520 | 0.999745 | 0.000392520 | 0.999745 |
| Benzene+cycloprop-2-enylidene | 0.000232448 | 0.999977 | 0.000232448 | 0.999977 |
| PhCCH+CH3                     | 7.03711e-06 | 0.999984 | 7.03711e-06 | 0.999984 |



|                               |             |          |             |          |
|-------------------------------|-------------|----------|-------------|----------|
| C2H2+PhCH2                    | 5.75599e-06 | 0.999990 | 5.75599e-06 | 0.999990 |
| PhCCCH3+H                     | 4.24633e-06 | 0.999994 | 4.24633e-06 | 0.999994 |
| Ph+MeAc                       | 3.67074e-06 | 0.999998 | 3.67074e-06 | 0.999998 |
| rad67                         | 1.07014e-06 | 0.999999 | 1.07014e-06 | 0.999999 |
| rad35                         | 4.58209e-07 | 1.000000 | 4.58209e-07 | 1.000000 |
| Ph+Allene                     | 4.38146e-07 | 1.000000 | 4.38146e-07 | 1.000000 |
| Benzene+cycloprop-1-enylidene | 1.70010e-07 | 1.000000 | 1.70010e-07 | 1.000000 |
| PhCH2CCH+H                    | 6.49249e-08 | 1.000000 | 6.49249e-08 | 1.000000 |
| PAH7+H                        | 4.85969e-08 | 1.000000 | 4.85969e-08 | 1.000000 |
| rad39                         | 1.36915e-08 | 1.000000 | 1.36915e-08 | 1.000000 |
| rad37                         | 1.33953e-08 | 1.000000 | 1.33953e-08 | 1.000000 |
| rad30                         | 8.79824e-09 | 1.000000 | 8.79824e-09 | 1.000000 |
| PAH9+H                        | 7.39440e-10 | 1.000000 | 7.39440e-10 | 1.000000 |
| rad38                         | 3.50207e-10 | 1.000000 | 3.50207e-10 | 1.000000 |
| rad60syn                      | 5.35914e-11 | 1.000000 | 5.35914e-11 | 1.000000 |
| PAH10+CH3                     | 5.18069e-11 | 1.000000 | 5.18069e-11 | 1.000000 |
| PhcycC3H3_A+H                 | 4.10038e-11 | 1.000000 | 4.10038e-11 | 1.000000 |
| PAH3+H                        | 3.28545e-11 | 1.000000 | 3.28545e-11 | 1.000000 |
| rad60anti                     | 2.69725e-11 | 1.000000 | 2.69725e-11 | 1.000000 |
| rad46                         | 2.29231e-11 | 1.000000 | 2.29231e-11 | 1.000000 |
| rad59                         | 6.36288e-12 | 1.000000 | 6.36288e-12 | 1.000000 |
| rad54                         | 1.88750e-12 | 1.000000 | 1.88750e-12 | 1.000000 |
| rad43                         | 1.81039e-12 | 1.000000 | 1.81039e-12 | 1.000000 |
| Phenyl+cycC3H4                | 5.81829e-13 | 1.000000 | 0.000000    | 1.000000 |
| PhcycC3H3_B+H                 | 4.18958e-13 | 1.000000 | 4.18958e-13 | 1.000000 |
| rad62                         | 4.04842e-13 | 1.000000 | 4.04842e-13 | 1.000000 |
| rad50                         | 2.82712e-13 | 1.000000 | 2.82712e-13 | 1.000000 |
| rad70                         | 5.67278e-14 | 1.000000 | 5.67278e-14 | 1.000000 |
| PAH1+H                        | 2.73408e-14 | 1.000000 | 2.73408e-14 | 1.000000 |
| rad55                         | 2.51279e-14 | 1.000000 | 2.51279e-14 | 1.000000 |
| rad52                         | 2.88259e-15 | 1.000000 | 2.88259e-15 | 1.000000 |
| rad58                         | 1.83842e-15 | 1.000000 | 1.83842e-15 | 1.000000 |
| rad34                         | 1.52749e-15 | 1.000000 | 1.52749e-15 | 1.000000 |
| rad51                         | 1.24148e-15 | 1.000000 | 1.24148e-15 | 1.000000 |
| rad41                         | 3.95307e-16 | 1.000000 | 3.95307e-16 | 1.000000 |
| rad42                         | 2.45830e-16 | 1.000000 | 2.45830e-16 | 1.000000 |
| rad65                         | 3.15143e-17 | 1.000000 | 3.15143e-17 | 1.000000 |
| rad53                         | 4.58646e-18 | 1.000000 | 4.58646e-18 | 1.000000 |
| rad64                         | 1.30087e-18 | 1.000000 | 1.30087e-18 | 1.000000 |
| rad61                         | 2.85229e-19 | 1.000000 | 2.85229e-19 | 1.000000 |
| rad56                         | 2.08057e-20 | 1.000000 | 2.08057e-20 | 1.000000 |
| rad68syn                      | 2.52165e-21 | 1.000000 | 2.52165e-21 | 1.000000 |
| rad68anti                     | 1.90888e-21 | 1.000000 | 1.90888e-21 | 1.000000 |
| rad40syn                      | 2.38315e-23 | 1.000000 | 2.38315e-23 | 1.000000 |
| rad40anti                     | 1.90761e-23 | 1.000000 | 1.90761e-23 | 1.000000 |
| PAH8+H                        | 3.38041e-24 | 1.000000 | 3.38041e-24 | 1.000000 |
| rad73                         | 9.42051e-25 | 1.000000 | 9.42051e-25 | 1.000000 |
| rad6                          | 8.97172e-25 | 1.000000 | 8.97172e-25 | 1.000000 |
| rad71                         | 6.14187e-27 | 1.000000 | 6.14187e-27 | 1.000000 |
| rad2                          | 1.27735e-27 | 1.000000 | 1.27735e-27 | 1.000000 |
| rad28                         | 1.10867e-27 | 1.000000 | 1.10867e-27 | 1.000000 |
| rad26                         | 7.08277e-28 | 1.000000 | 7.08277e-28 | 1.000000 |
| rad19anti                     | 6.07609e-28 | 1.000000 | 6.07609e-28 | 1.000000 |
| rad1                          | 8.89243e-29 | 1.000000 | 8.89243e-29 | 1.000000 |
| rad7                          | 6.70136e-29 | 1.000000 | 6.70136e-29 | 1.000000 |
| rad10                         | 6.65129e-29 | 1.000000 | 6.65129e-29 | 1.000000 |
| rad11                         | 1.65600e-29 | 1.000000 | 1.65600e-29 | 1.000000 |
| rad47                         | 9.27327e-30 | 1.000000 | 9.27327e-30 | 1.000000 |
| rad3                          | 6.72035e-30 | 1.000000 | 6.72035e-30 | 1.000000 |
| rad4                          | 3.48128e-30 | 1.000000 | 3.48128e-30 | 1.000000 |
| rad9                          | 1.55425e-30 | 1.000000 | 1.55425e-30 | 1.000000 |
| rad13                         | 3.78401e-31 | 1.000000 | 3.78401e-31 | 1.000000 |
| rad14                         | 4.70460e-33 | 1.000000 | 4.70460e-33 | 1.000000 |
| rad25                         | 1.98743e-33 | 1.000000 | 1.98743e-33 | 1.000000 |
| rad27                         | 1.48535e-33 | 1.000000 | 1.48535e-33 | 1.000000 |
| rad31                         | 1.47037e-33 | 1.000000 | 1.47037e-33 | 1.000000 |
| rad33                         | 7.29206e-34 | 1.000000 | 7.29206e-34 | 1.000000 |
| rad15                         | 6.94179e-34 | 1.000000 | 6.94179e-34 | 1.000000 |
| rad5                          | 1.75262e-35 | 1.000000 | 1.75262e-35 | 1.000000 |
| rad23                         | 1.36938e-36 | 1.000000 | 1.36938e-36 | 1.000000 |
| rad19syn                      | 1.11381e-36 | 1.000000 | 1.11381e-36 | 1.000000 |
| rad45                         | 9.71237e-39 | 1.000000 | 9.71237e-39 | 1.000000 |
| rad12                         | 9.02802e-39 | 1.000000 | 9.02802e-39 | 1.000000 |
| rad20                         | 6.41799e-39 | 1.000000 | 6.41799e-39 | 1.000000 |
| rad21                         | 5.12383e-39 | 1.000000 | 5.12383e-39 | 1.000000 |
| rad36                         | 6.09858e-40 | 1.000000 | 6.09858e-40 | 1.000000 |
| rad22                         | 1.89653e-40 | 1.000000 | 1.89653e-40 | 1.000000 |
| rad18                         | 2.48283e-41 | 1.000000 | 2.48283e-41 | 1.000000 |
| rad24                         | 2.12186e-44 | 1.000000 | 2.12186e-44 | 1.000000 |
| rad8                          | 7.24185e-61 | 1.000000 | 7.24185e-61 | 1.000000 |

0.100000000E-03 Pa, 240.00000 K

=====

| Rate constant             | True (fraction)        | Effective (fraction)   |
|---------------------------|------------------------|------------------------|
| Total                     | 2.45462e-14 (1.00 )    | 2.45462e-14 (1.00 )    |
| Formation of rad19        | 2.45383e-14 (1.000 )   | 2.45383e-14 (1.000 )   |
| H-abstraction to cyc2enyl | 7.92234e-18 (0.000323) | 7.92234e-18 (0.000323) |
| H-abstraction to cyclenyl | 7.97958e-21 (3.25e-07) | 7.97958e-21 (3.25e-07) |

| species                       | PYtrue      | Cumul    | PYeffective | Cumul    |
|-------------------------------|-------------|----------|-------------|----------|
| Indene+H                      | 0.999241    | 0.999241 | 0.999241    | 0.999241 |
| PhCHCCH2+H                    | 0.000411192 | 0.999652 | 0.000411192 | 0.999652 |
| Benzene+cycloprop-2-enylidene | 0.000322752 | 0.999975 | 0.000322752 | 0.999975 |
| PhCCH+CH3                     | 7.38193e-06 | 0.999982 | 7.38193e-06 | 0.999982 |
| C2H2+PhCH2                    | 6.11552e-06 | 0.999989 | 6.11552e-06 | 0.999989 |
| PhCCCH3+H                     | 4.48334e-06 | 0.999993 | 4.48334e-06 | 0.999993 |
| Ph+MeAc                       | 3.92459e-06 | 0.999997 | 3.92459e-06 | 0.999997 |
| rad67                         | 1.14122e-06 | 0.999998 | 1.14122e-06 | 0.999998 |
| rad35                         | 4.87362e-07 | 0.999999 | 4.87362e-07 | 0.999999 |
| Ph+Allene                     | 4.81637e-07 | 0.999999 | 4.81637e-07 | 0.999999 |
| Benzene+cycloprop-1-enylidene | 3.25084e-07 | 0.999999 | 3.25084e-07 | 0.999999 |
| PhCH2CCH+H                    | 7.25473e-08 | 0.999999 | 7.25473e-08 | 0.999999 |
| PAH7+H                        | 5.26259e-08 | 0.999999 | 5.26259e-08 | 0.999999 |
| rad39                         | 1.48190e-08 | 0.999999 | 1.48190e-08 | 0.999999 |
| rad37                         | 1.45756e-08 | 1.000000 | 1.45756e-08 | 1.000000 |
| rad30                         | 9.38701e-09 | 1.000000 | 9.38701e-09 | 1.000000 |
| PAH9+H                        | 8.06644e-10 | 1.000000 | 8.06644e-10 | 1.000000 |
| rad38                         | 3.86296e-10 | 1.000000 | 3.86296e-10 | 1.000000 |
| PAH10+CH3                     | 6.19064e-11 | 1.000000 | 6.19064e-11 | 1.000000 |
| rad60syn                      | 5.88324e-11 | 1.000000 | 5.88324e-11 | 1.000000 |
| PhcycC3H3_A+H                 | 5.47108e-11 | 1.000000 | 5.47108e-11 | 1.000000 |
| PAH3+H                        | 3.74112e-11 | 1.000000 | 3.74112e-11 | 1.000000 |
| rad60anti                     | 2.96857e-11 | 1.000000 | 2.96857e-11 | 1.000000 |
| rad46                         | 2.54473e-11 | 1.000000 | 2.54473e-11 | 1.000000 |
| rad59                         | 7.20067e-12 | 1.000000 | 7.20067e-12 | 1.000000 |
| rad54                         | 2.25389e-12 | 1.000000 | 2.25389e-12 | 1.000000 |
| rad43                         | 2.10782e-12 | 1.000000 | 2.10782e-12 | 1.000000 |
| Phenyl+cycC3H4                | 8.50545e-13 | 1.000000 | 0.000000    | 1.000000 |
| PhcycC3H3_B+H                 | 6.80482e-13 | 1.000000 | 6.80482e-13 | 1.000000 |
| rad62                         | 4.71503e-13 | 1.000000 | 4.71503e-13 | 1.000000 |
| rad50                         | 3.31263e-13 | 1.000000 | 3.31263e-13 | 1.000000 |
| rad70                         | 7.10718e-14 | 1.000000 | 7.10718e-14 | 1.000000 |
| PAH1+H                        | 3.63160e-14 | 1.000000 | 3.63160e-14 | 1.000000 |
| rad55                         | 3.14575e-14 | 1.000000 | 3.14575e-14 | 1.000000 |
| rad52                         | 3.51286e-15 | 1.000000 | 3.51286e-15 | 1.000000 |
| rad58                         | 2.35637e-15 | 1.000000 | 2.35637e-15 | 1.000000 |
| rad34                         | 2.03776e-15 | 1.000000 | 2.03776e-15 | 1.000000 |
| rad51                         | 1.58175e-15 | 1.000000 | 1.58175e-15 | 1.000000 |
| rad41                         | 5.40330e-16 | 1.000000 | 5.40330e-16 | 1.000000 |
| rad42                         | 3.27189e-16 | 1.000000 | 3.27189e-16 | 1.000000 |
| rad65                         | 4.07879e-17 | 1.000000 | 4.07879e-17 | 1.000000 |
| rad53                         | 7.54377e-18 | 1.000000 | 7.54377e-18 | 1.000000 |
| rad64                         | 2.25726e-18 | 1.000000 | 2.25726e-18 | 1.000000 |
| rad61                         | 5.84087e-19 | 1.000000 | 5.84087e-19 | 1.000000 |
| rad56                         | 4.57228e-20 | 1.000000 | 4.57228e-20 | 1.000000 |
| rad68syn                      | 5.68633e-21 | 1.000000 | 5.68633e-21 | 1.000000 |
| rad68anti                     | 4.27663e-21 | 1.000000 | 4.27663e-21 | 1.000000 |
| rad40syn                      | 6.78314e-23 | 1.000000 | 6.78314e-23 | 1.000000 |
| rad40anti                     | 5.41986e-23 | 1.000000 | 5.41986e-23 | 1.000000 |
| PAH8+H                        | 1.13224e-23 | 1.000000 | 1.13224e-23 | 1.000000 |
| rad73                         | 2.68345e-24 | 1.000000 | 2.68345e-24 | 1.000000 |
| rad6                          | 1.16679e-24 | 1.000000 | 1.16679e-24 | 1.000000 |
| rad71                         | 2.20096e-26 | 1.000000 | 2.20096e-26 | 1.000000 |
| rad2                          | 2.12890e-27 | 1.000000 | 2.12890e-27 | 1.000000 |
| rad19anti                     | 2.07748e-27 | 1.000000 | 2.07748e-27 | 1.000000 |
| rad28                         | 1.31226e-27 | 1.000000 | 1.31226e-27 | 1.000000 |
| rad26                         | 9.99516e-28 | 1.000000 | 9.99516e-28 | 1.000000 |
| rad1                          | 1.49778e-28 | 1.000000 | 1.49778e-28 | 1.000000 |
| rad10                         | 1.11116e-28 | 1.000000 | 1.11116e-28 | 1.000000 |
| rad7                          | 8.73547e-29 | 1.000000 | 8.73547e-29 | 1.000000 |
| rad11                         | 2.15972e-29 | 1.000000 | 2.15972e-29 | 1.000000 |
| rad3                          | 1.09643e-29 | 1.000000 | 1.09643e-29 | 1.000000 |
| rad47                         | 1.03948e-29 | 1.000000 | 1.03948e-29 | 1.000000 |
| rad4                          | 5.69646e-30 | 1.000000 | 5.69646e-30 | 1.000000 |
| rad9                          | 3.81952e-30 | 1.000000 | 3.81952e-30 | 1.000000 |
| rad13                         | 4.94267e-31 | 1.000000 | 4.94267e-31 | 1.000000 |
| rad14                         | 5.91158e-33 | 1.000000 | 5.91158e-33 | 1.000000 |
| rad31                         | 4.04918e-33 | 1.000000 | 4.04918e-33 | 1.000000 |

|          |             |          |             |          |
|----------|-------------|----------|-------------|----------|
| rad25    | 2.18603e-33 | 1.000000 | 2.18603e-33 | 1.000000 |
| rad27    | 2.16802e-33 | 1.000000 | 2.16802e-33 | 1.000000 |
| rad15    | 1.70996e-33 | 1.000000 | 1.70996e-33 | 1.000000 |
| rad33    | 9.54646e-34 | 1.000000 | 9.54646e-34 | 1.000000 |
| rad5     | 1.62521e-35 | 1.000000 | 1.62521e-35 | 1.000000 |
| rad23    | 4.69079e-36 | 1.000000 | 4.69079e-36 | 1.000000 |
| rad19syn | 4.33470e-36 | 1.000000 | 4.33470e-36 | 1.000000 |
| rad45    | 3.34387e-38 | 1.000000 | 3.34387e-38 | 1.000000 |
| rad12    | 2.21452e-38 | 1.000000 | 2.21452e-38 | 1.000000 |
| rad20    | 8.94021e-39 | 1.000000 | 8.94021e-39 | 1.000000 |
| rad21    | 7.15992e-39 | 1.000000 | 7.15992e-39 | 1.000000 |
| rad36    | 2.10958e-39 | 1.000000 | 2.10958e-39 | 1.000000 |
| rad22    | 5.85960e-40 | 1.000000 | 5.85960e-40 | 1.000000 |
| rad18    | 3.41403e-41 | 1.000000 | 3.41403e-41 | 1.000000 |
| rad24    | 3.41702e-44 | 1.000000 | 3.41702e-44 | 1.000000 |
| rad8     | 1.31974e-60 | 1.000000 | 1.31974e-60 | 1.000000 |

0.100000000E-03 Pa, 250.00000 K

```

=====
Rate constant      | True (fraction)      Effective (fraction)
-----
Total              | 2.71048e-14 (1.00   ) 2.71048e-14 (1.00   )
Formation of rad19 | 2.70930e-14 (1.000  ) 2.70930e-14 (1.000  )
H-abstraction to cyc2enyl | 1.17991e-17 (0.000435) 1.17991e-17 (0.000435)
H-abstraction to cyclenyl | 1.59554e-20 (5.89e-07) 1.59554e-20 (5.89e-07)

```

| species                       | PYtrue      | Cumul    | PYeffective | Cumul    |
|-------------------------------|-------------|----------|-------------|----------|
| Indene+H                      | 0.999107    | 0.999107 | 0.999107    | 0.999107 |
| Benzene+cycloprop-2-enylidene | 0.000435312 | 0.999543 | 0.000435312 | 0.999543 |
| PhCHCCH2+H                    | 0.000431584 | 0.999974 | 0.000431584 | 0.999974 |
| PhCCH+CH3                     | 7.75719e-06 | 0.999982 | 7.75719e-06 | 0.999982 |
| C2H2+PhCH2                    | 6.51325e-06 | 0.999988 | 6.51325e-06 | 0.999988 |
| PhCCCH3+H                     | 4.74360e-06 | 0.999993 | 4.74360e-06 | 0.999993 |
| Ph+MeAc                       | 4.20682e-06 | 0.999997 | 4.20682e-06 | 0.999997 |
| rad67                         | 1.22017e-06 | 0.999999 | 1.22017e-06 | 0.999999 |
| Benzene+cycloprop-1-enylidene | 5.88656e-07 | 0.999999 | 5.88656e-07 | 0.999999 |
| Ph+Allene                     | 5.31470e-07 | 1.000000 | 5.31470e-07 | 1.000000 |
| rad35                         | 5.19664e-07 | 1.000000 | 5.19664e-07 | 1.000000 |
| PhCH2CCH+H                    | 8.14208e-08 | 1.000000 | 8.14208e-08 | 1.000000 |
| PAH7+H                        | 5.71713e-08 | 1.000000 | 5.71713e-08 | 1.000000 |
| rad39                         | 1.60893e-08 | 1.000000 | 1.60893e-08 | 1.000000 |
| rad37                         | 1.59138e-08 | 1.000000 | 1.59138e-08 | 1.000000 |
| rad30                         | 1.00427e-08 | 1.000000 | 1.00427e-08 | 1.000000 |
| PAH9+H                        | 8.83297e-10 | 1.000000 | 8.83297e-10 | 1.000000 |
| rad38                         | 4.27983e-10 | 1.000000 | 4.27983e-10 | 1.000000 |
| PAH10+CH3                     | 7.44047e-11 | 1.000000 | 7.44047e-11 | 1.000000 |
| PhcycC3H3_A+H                 | 7.30900e-11 | 1.000000 | 7.30900e-11 | 1.000000 |
| rad60syn                      | 6.48406e-11 | 1.000000 | 6.48406e-11 | 1.000000 |
| PAH3+H                        | 4.28258e-11 | 1.000000 | 4.28258e-11 | 1.000000 |
| rad60anti                     | 3.28040e-11 | 1.000000 | 3.28040e-11 | 1.000000 |
| rad46                         | 2.83780e-11 | 1.000000 | 2.83780e-11 | 1.000000 |
| rad59                         | 8.18973e-12 | 1.000000 | 8.18973e-12 | 1.000000 |
| rad54                         | 2.70724e-12 | 1.000000 | 2.70724e-12 | 1.000000 |
| rad43                         | 2.46610e-12 | 1.000000 | 2.46610e-12 | 1.000000 |
| Phenyl+cycC3H4                | 1.23952e-12 | 1.000000 | 0.000000    | 1.000000 |
| PhcycC3H3_B+H                 | 1.09005e-12 | 1.000000 | 1.09005e-12 | 1.000000 |
| rad62                         | 5.51584e-13 | 1.000000 | 5.51584e-13 | 1.000000 |
| rad50                         | 3.90697e-13 | 1.000000 | 3.90697e-13 | 1.000000 |
| rad70                         | 8.95698e-14 | 1.000000 | 8.95698e-14 | 1.000000 |
| PAH1+H                        | 4.84541e-14 | 1.000000 | 4.84541e-14 | 1.000000 |
| rad55                         | 3.96074e-14 | 1.000000 | 3.96074e-14 | 1.000000 |
| rad52                         | 4.31275e-15 | 1.000000 | 4.31275e-15 | 1.000000 |
| rad58                         | 3.03881e-15 | 1.000000 | 3.03881e-15 | 1.000000 |
| rad34                         | 2.73083e-15 | 1.000000 | 2.73083e-15 | 1.000000 |
| rad51                         | 2.03105e-15 | 1.000000 | 2.03105e-15 | 1.000000 |
| rad41                         | 7.39637e-16 | 1.000000 | 7.39637e-16 | 1.000000 |
| rad42                         | 4.36202e-16 | 1.000000 | 4.36202e-16 | 1.000000 |
| rad65                         | 5.31792e-17 | 1.000000 | 5.31792e-17 | 1.000000 |
| rad53                         | 1.22795e-17 | 1.000000 | 1.22795e-17 | 1.000000 |
| rad64                         | 3.85184e-18 | 1.000000 | 3.85184e-18 | 1.000000 |
| rad61                         | 1.15688e-18 | 1.000000 | 1.15688e-18 | 1.000000 |
| rad56                         | 9.65547e-20 | 1.000000 | 9.65547e-20 | 1.000000 |
| rad68syn                      | 1.22759e-20 | 1.000000 | 1.22759e-20 | 1.000000 |
| rad68anti                     | 9.17624e-21 | 1.000000 | 9.17624e-21 | 1.000000 |
| rad40syn                      | 1.79832e-22 | 1.000000 | 1.79832e-22 | 1.000000 |
| rad40anti                     | 1.43402e-22 | 1.000000 | 1.43402e-22 | 1.000000 |
| PAH8+H                        | 3.45929e-23 | 1.000000 | 3.45929e-23 | 1.000000 |
| rad73                         | 7.15479e-24 | 1.000000 | 7.15479e-24 | 1.000000 |
| rad6                          | 1.68884e-24 | 1.000000 | 1.68884e-24 | 1.000000 |

|           |             |         |             |         |
|-----------|-------------|---------|-------------|---------|
| rad71     | 7.13355e-26 | 1.00000 | 7.13355e-26 | 1.00000 |
| rad19anti | 7.31068e-27 | 1.00000 | 7.31068e-27 | 1.00000 |
| rad2      | 3.80831e-27 | 1.00000 | 3.80831e-27 | 1.00000 |
| rad28     | 1.71902e-27 | 1.00000 | 1.71902e-27 | 1.00000 |
| rad26     | 1.51047e-27 | 1.00000 | 1.51047e-27 | 1.00000 |
| rad1      | 2.71001e-28 | 1.00000 | 2.71001e-28 | 1.00000 |
| rad10     | 1.99259e-28 | 1.00000 | 1.99259e-28 | 1.00000 |
| rad7      | 1.26742e-28 | 1.00000 | 1.26742e-28 | 1.00000 |
| rad11     | 3.13515e-29 | 1.00000 | 3.13515e-29 | 1.00000 |
| rad3      | 1.93028e-29 | 1.00000 | 1.93028e-29 | 1.00000 |
| rad47     | 1.18404e-29 | 1.00000 | 1.18404e-29 | 1.00000 |
| rad9      | 1.08964e-29 | 1.00000 | 1.08964e-29 | 1.00000 |
| rad4      | 1.00607e-29 | 1.00000 | 1.00607e-29 | 1.00000 |
| rad13     | 7.18655e-31 | 1.00000 | 7.18655e-31 | 1.00000 |
| rad31     | 1.15506e-32 | 1.00000 | 1.15506e-32 | 1.00000 |
| rad14     | 7.98164e-33 | 1.00000 | 7.98164e-33 | 1.00000 |
| rad15     | 4.89008e-33 | 1.00000 | 4.89008e-33 | 1.00000 |
| rad27     | 3.41649e-33 | 1.00000 | 3.41649e-33 | 1.00000 |
| rad25     | 2.49121e-33 | 1.00000 | 2.49121e-33 | 1.00000 |
| rad33     | 1.39134e-33 | 1.00000 | 1.39134e-33 | 1.00000 |
| rad19syn  | 1.76219e-35 | 1.00000 | 1.76219e-35 | 1.00000 |
| rad23     | 1.72725e-35 | 1.00000 | 1.72725e-35 | 1.00000 |
| rad5      | 1.51200e-35 | 1.00000 | 1.51200e-35 | 1.00000 |
| rad45     | 1.24006e-37 | 1.00000 | 1.24006e-37 | 1.00000 |
| rad12     | 6.31511e-38 | 1.00000 | 6.31511e-38 | 1.00000 |
| rad20     | 1.37220e-38 | 1.00000 | 1.37220e-38 | 1.00000 |
| rad21     | 1.09983e-38 | 1.00000 | 1.09983e-38 | 1.00000 |
| rad36     | 7.86450e-39 | 1.00000 | 7.86450e-39 | 1.00000 |
| rad22     | 2.02520e-39 | 1.00000 | 2.02520e-39 | 1.00000 |
| rad18     | 5.21730e-41 | 1.00000 | 5.21730e-41 | 1.00000 |
| rad24     | 5.77265e-44 | 1.00000 | 5.77265e-44 | 1.00000 |
| rad8      | 2.45886e-60 | 1.00000 | 2.45886e-60 | 1.00000 |

0.100000000E-03 Pa, 260.000000 K

| Rate constant             | True (fraction)        | Effective (fraction)   |
|---------------------------|------------------------|------------------------|
| Total                     | 2.97464e-14 (1.00)     | 2.97464e-14 (1.00)     |
| Formation of rad19        | 2.97293e-14 (0.999)    | 2.97293e-14 (0.999)    |
| H-abstraction to cyc2enyl | 1.70236e-17 (0.000572) | 1.70236e-17 (0.000572) |
| H-abstraction to cyc1enyl | 3.02186e-20 (1.02e-06) | 3.02186e-20 (1.02e-06) |

| species                       | PYtrue      | Cumul    | PYeffective | Cumul    |
|-------------------------------|-------------|----------|-------------|----------|
| Indene+H                      | 0.998946    | 0.998946 | 0.998946    | 0.998946 |
| Benzene+cycloprop-2-enylidene | 0.000572291 | 0.999518 | 0.000572291 | 0.999518 |
| PhCHCCH2+H                    | 0.000453848 | 0.999972 | 0.000453848 | 0.999972 |
| PhCCH+CH3                     | 8.16529e-06 | 0.999980 | 8.16529e-06 | 0.999980 |
| C2H2+PhCH2                    | 6.95320e-06 | 0.999987 | 6.95320e-06 | 0.999987 |
| PhCCCH3+H                     | 5.02932e-06 | 0.999992 | 5.02932e-06 | 0.999992 |
| Ph+MeAc                       | 4.52059e-06 | 0.999997 | 4.52059e-06 | 0.999997 |
| rad67                         | 1.30785e-06 | 0.999998 | 1.30785e-06 | 0.999998 |
| Benzene+cycloprop-1-enylidene | 1.01588e-06 | 0.999999 | 1.01588e-06 | 0.999999 |
| Ph+Allene                     | 5.88615e-07 | 1.000000 | 5.88615e-07 | 1.000000 |
| rad35                         | 5.55458e-07 | 1.000000 | 5.55458e-07 | 1.000000 |
| PhCH2CCH+H                    | 9.17630e-08 | 1.000000 | 9.17630e-08 | 1.000000 |
| PAH7+H                        | 6.23012e-08 | 1.000000 | 6.23012e-08 | 1.000000 |
| rad39                         | 1.75208e-08 | 1.000000 | 1.75208e-08 | 1.000000 |
| rad37                         | 1.74317e-08 | 1.000000 | 1.74317e-08 | 1.000000 |
| rad30                         | 1.07732e-08 | 1.000000 | 1.07732e-08 | 1.000000 |
| PAH9+H                        | 9.70819e-10 | 1.000000 | 9.70819e-10 | 1.000000 |
| rad38                         | 4.76208e-10 | 1.000000 | 4.76208e-10 | 1.000000 |
| PhcycC3H3_A+H                 | 9.76900e-11 | 1.000000 | 9.76900e-11 | 1.000000 |
| PAH10+CH3                     | 8.98995e-11 | 1.000000 | 8.98995e-11 | 1.000000 |
| rad60syn                      | 7.17360e-11 | 1.000000 | 7.17360e-11 | 1.000000 |
| PAH3+H                        | 4.92718e-11 | 1.000000 | 4.92718e-11 | 1.000000 |
| rad60anti                     | 3.63918e-11 | 1.000000 | 3.63918e-11 | 1.000000 |
| rad46                         | 3.17860e-11 | 1.000000 | 3.17860e-11 | 1.000000 |
| rad59                         | 9.35933e-12 | 1.000000 | 9.35933e-12 | 1.000000 |
| rad54                         | 3.26919e-12 | 1.000000 | 3.26919e-12 | 1.000000 |
| rad43                         | 2.89821e-12 | 1.000000 | 2.89821e-12 | 1.000000 |
| Phenyl+cycC3H4                | 1.79997e-12 | 1.000000 | 0.000000    | 1.000000 |
| PhcycC3H3_B+H                 | 1.72357e-12 | 1.000000 | 1.72357e-12 | 1.000000 |
| rad62                         | 6.47856e-13 | 1.000000 | 6.47856e-13 | 1.000000 |
| rad50                         | 4.63653e-13 | 1.000000 | 4.63653e-13 | 1.000000 |
| rad70                         | 1.13461e-13 | 1.000000 | 1.13461e-13 | 1.000000 |
| PAH1+H                        | 6.48742e-14 | 1.000000 | 6.48742e-14 | 1.000000 |
| rad55                         | 5.01157e-14 | 1.000000 | 5.01157e-14 | 1.000000 |
| rad52                         | 5.33105e-15 | 1.000000 | 5.33105e-15 | 1.000000 |
| rad58                         | 3.93954e-15 | 1.000000 | 3.93954e-15 | 1.000000 |

|           |             |         |             |         |
|-----------|-------------|---------|-------------|---------|
| rad34     | 3.67249e-15 | 1.00000 | 3.67249e-15 | 1.00000 |
| rad51     | 2.62613e-15 | 1.00000 | 2.62613e-15 | 1.00000 |
| rad41     | 1.01308e-15 | 1.00000 | 1.01308e-15 | 1.00000 |
| rad42     | 5.82031e-16 | 1.00000 | 5.82031e-16 | 1.00000 |
| rad65     | 6.97788e-17 | 1.00000 | 6.97788e-17 | 1.00000 |
| rad53     | 1.97859e-17 | 1.00000 | 1.97859e-17 | 1.00000 |
| rad64     | 6.46993e-18 | 1.00000 | 6.46993e-18 | 1.00000 |
| rad61     | 2.22252e-18 | 1.00000 | 2.22252e-18 | 1.00000 |
| rad56     | 1.96582e-19 | 1.00000 | 1.96582e-19 | 1.00000 |
| rad68syn  | 2.54703e-20 | 1.00000 | 2.54703e-20 | 1.00000 |
| rad68anti | 1.89312e-20 | 1.00000 | 1.89312e-20 | 1.00000 |
| rad40syn  | 4.46797e-22 | 1.00000 | 4.46797e-22 | 1.00000 |
| rad40anti | 3.55554e-22 | 1.00000 | 3.55554e-22 | 1.00000 |
| PAH8+H    | 9.71819e-23 | 1.00000 | 9.71819e-23 | 1.00000 |
| rad73     | 1.79366e-23 | 1.00000 | 1.79366e-23 | 1.00000 |
| rad6      | 2.70700e-24 | 1.00000 | 2.70700e-24 | 1.00000 |
| rad71     | 2.10957e-25 | 1.00000 | 2.10957e-25 | 1.00000 |
| rad19anti | 2.63456e-26 | 1.00000 | 2.63456e-26 | 1.00000 |
| rad2      | 7.21406e-27 | 1.00000 | 7.21406e-27 | 1.00000 |
| rad28     | 2.49048e-27 | 1.00000 | 2.49048e-27 | 1.00000 |
| rad26     | 2.41924e-27 | 1.00000 | 2.41924e-27 | 1.00000 |
| rad1      | 5.19699e-28 | 1.00000 | 5.19699e-28 | 1.00000 |
| rad10     | 3.78417e-28 | 1.00000 | 3.78417e-28 | 1.00000 |
| rad7      | 2.03656e-28 | 1.00000 | 2.03656e-28 | 1.00000 |
| rad11     | 5.04048e-29 | 1.00000 | 5.04048e-29 | 1.00000 |
| rad3      | 3.61284e-29 | 1.00000 | 3.61284e-29 | 1.00000 |
| rad9      | 3.42390e-29 | 1.00000 | 3.42390e-29 | 1.00000 |
| rad4      | 1.88955e-29 | 1.00000 | 1.88955e-29 | 1.00000 |
| rad47     | 1.37153e-29 | 1.00000 | 1.37153e-29 | 1.00000 |
| rad13     | 1.15734e-30 | 1.00000 | 1.15734e-30 | 1.00000 |
| rad31     | 3.40287e-32 | 1.00000 | 3.40287e-32 | 1.00000 |
| rad15     | 1.54043e-32 | 1.00000 | 1.54043e-32 | 1.00000 |
| rad14     | 1.16353e-32 | 1.00000 | 1.16353e-32 | 1.00000 |
| rad27     | 5.76898e-33 | 1.00000 | 5.76898e-33 | 1.00000 |
| rad25     | 2.98724e-33 | 1.00000 | 2.98724e-33 | 1.00000 |
| rad33     | 2.24628e-33 | 1.00000 | 2.24628e-33 | 1.00000 |
| rad19syn  | 7.46104e-35 | 1.00000 | 7.46104e-35 | 1.00000 |
| rad23     | 6.79149e-35 | 1.00000 | 6.79149e-35 | 1.00000 |
| rad5      | 1.41090e-35 | 1.00000 | 1.41090e-35 | 1.00000 |
| rad45     | 4.92265e-37 | 1.00000 | 4.92265e-37 | 1.00000 |
| rad12     | 1.99358e-37 | 1.00000 | 1.99358e-37 | 1.00000 |
| rad36     | 3.14025e-38 | 1.00000 | 3.14025e-38 | 1.00000 |
| rad20     | 2.32515e-38 | 1.00000 | 2.32515e-38 | 1.00000 |
| rad21     | 1.86215e-38 | 1.00000 | 1.86215e-38 | 1.00000 |
| rad22     | 7.58792e-39 | 1.00000 | 7.58792e-39 | 1.00000 |
| rad18     | 8.86493e-41 | 1.00000 | 8.86493e-41 | 1.00000 |
| rad24     | 1.05349e-43 | 1.00000 | 1.05349e-43 | 1.00000 |
| rad8      | 4.68596e-60 | 1.00000 | 4.68596e-60 | 1.00000 |

0.100000000E-03 Pa, 270.000000 K

| Rate constant             | True (fraction)        | Effective (fraction)   |
|---------------------------|------------------------|------------------------|
| Total                     | 3.24655e-14 (1.00)     | 3.24655e-14 (1.00)     |
| Formation of rad19        | 3.24415e-14 (0.999)    | 3.24415e-14 (0.999)    |
| H-abstraction to cyc2enyl | 2.38790e-17 (0.000736) | 2.38790e-17 (0.000736) |
| H-abstraction to cyc1enyl | 5.45397e-20 (1.68e-06) | 5.45397e-20 (1.68e-06) |

| species                       | PYtrue      | Cumul    | PYeffective | Cumul    |
|-------------------------------|-------------|----------|-------------|----------|
| Indene+H                      | 0.998755    | 0.998755 | 0.998755    | 0.998755 |
| Benzene+cycloprop-2-enylidene | 0.000735519 | 0.999491 | 0.000735519 | 0.999491 |
| PhCHCCH2+H                    | 0.000478146 | 0.999969 | 0.000478146 | 0.999969 |
| PhCCH+CH3                     | 8.60880e-06 | 0.999977 | 8.60880e-06 | 0.999977 |
| C2H2+PhCH2                    | 7.43972e-06 | 0.999985 | 7.43972e-06 | 0.999985 |
| PhCCCH3+H                     | 5.34286e-06 | 0.999990 | 5.34286e-06 | 0.999990 |
| Ph+MeAc                       | 4.86938e-06 | 0.999995 | 4.86938e-06 | 0.999995 |
| Benzene+cycloprop-1-enylidene | 1.67993e-06 | 0.999997 | 1.67993e-06 | 0.999997 |
| rad67                         | 1.40525e-06 | 0.999998 | 1.40525e-06 | 0.999998 |
| Ph+Allene                     | 6.54183e-07 | 0.999999 | 6.54183e-07 | 0.999999 |
| rad35                         | 5.95116e-07 | 0.999999 | 5.95116e-07 | 0.999999 |
| PhCH2CCH+H                    | 1.03827e-07 | 1.000000 | 1.03827e-07 | 1.000000 |
| PAH7+H                        | 6.80920e-08 | 1.000000 | 6.80920e-08 | 1.000000 |
| rad37                         | 1.91542e-08 | 1.000000 | 1.91542e-08 | 1.000000 |
| rad39                         | 1.91342e-08 | 1.000000 | 1.91342e-08 | 1.000000 |
| rad30                         | 1.15872e-08 | 1.000000 | 1.15872e-08 | 1.000000 |
| PAH9+H                        | 1.07084e-09 | 1.000000 | 1.07084e-09 | 1.000000 |
| rad38                         | 5.32067e-10 | 1.000000 | 5.32067e-10 | 1.000000 |
| PhcycC3H3_A+H                 | 1.30538e-10 | 1.000000 | 1.30538e-10 | 1.000000 |
| PAH10+CH3                     | 1.09134e-10 | 1.000000 | 1.09134e-10 | 1.000000 |

|                |             |          |             |          |
|----------------|-------------|----------|-------------|----------|
| rad60syn       | 7.96566e-11 | 1.000000 | 7.96566e-11 | 1.000000 |
| PAH3+H         | 5.69579e-11 | 1.000000 | 5.69579e-11 | 1.000000 |
| rad60anti      | 4.05237e-11 | 1.000000 | 4.05237e-11 | 1.000000 |
| rad46          | 3.57542e-11 | 1.000000 | 3.57542e-11 | 1.000000 |
| rad59          | 1.07444e-11 | 1.000000 | 1.07444e-11 | 1.000000 |
| rad54          | 3.96662e-12 | 1.000000 | 3.96662e-12 | 1.000000 |
| rad43          | 3.41976e-12 | 1.000000 | 3.41976e-12 | 1.000000 |
| PhcycC3H3_B+H  | 2.69151e-12 | 1.000000 | 2.69151e-12 | 1.000000 |
| Phenyl+cycC3H4 | 2.60320e-12 | 1.000000 | 0.00000     | 1.000000 |
| rad62          | 7.63632e-13 | 1.000000 | 7.63632e-13 | 1.000000 |
| rad50          | 5.53417e-13 | 1.000000 | 5.53417e-13 | 1.000000 |
| rad70          | 1.44342e-13 | 1.000000 | 1.44342e-13 | 1.000000 |
| PAH1+H         | 8.70734e-14 | 1.000000 | 8.70734e-14 | 1.000000 |
| rad55          | 6.36734e-14 | 1.000000 | 6.36734e-14 | 1.000000 |
| rad52          | 6.63061e-15 | 1.000000 | 6.63061e-15 | 1.000000 |
| rad58          | 5.12944e-15 | 1.000000 | 5.12944e-15 | 1.000000 |
| rad34          | 4.95115e-15 | 1.000000 | 4.95115e-15 | 1.000000 |
| rad51          | 3.41603e-15 | 1.000000 | 3.41603e-15 | 1.000000 |
| rad41          | 1.38732e-15 | 1.000000 | 1.38732e-15 | 1.000000 |
| rad42          | 7.76676e-16 | 1.000000 | 7.76676e-16 | 1.000000 |
| rad65          | 9.20532e-17 | 1.000000 | 9.20532e-17 | 1.000000 |
| rad53          | 3.15547e-17 | 1.000000 | 3.15547e-17 | 1.000000 |
| rad64          | 1.07029e-17 | 1.000000 | 1.07029e-17 | 1.000000 |
| rad61          | 4.14941e-18 | 1.000000 | 4.14941e-18 | 1.000000 |
| rad56          | 3.86757e-19 | 1.000000 | 3.86757e-19 | 1.000000 |
| rad68syn       | 5.09277e-20 | 1.000000 | 5.09277e-20 | 1.000000 |
| rad68anti      | 3.76572e-20 | 1.000000 | 3.76572e-20 | 1.000000 |
| rad40syn       | 1.04541e-21 | 1.000000 | 1.04541e-21 | 1.000000 |
| rad40anti      | 8.30243e-22 | 1.000000 | 8.30243e-22 | 1.000000 |
| PAH8+H         | 2.52772e-22 | 1.000000 | 2.52772e-22 | 1.000000 |
| rad73          | 4.24307e-23 | 1.000000 | 4.24307e-23 | 1.000000 |
| rad6           | 4.76564e-24 | 1.000000 | 4.76564e-24 | 1.000000 |
| rad71          | 5.73648e-25 | 1.000000 | 5.73648e-25 | 1.000000 |
| rad19anti      | 9.66974e-26 | 1.000000 | 9.66974e-26 | 1.000000 |
| rad2           | 1.43371e-26 | 1.000000 | 1.43371e-26 | 1.000000 |
| rad26          | 4.06871e-27 | 1.000000 | 4.06871e-27 | 1.000000 |
| rad28          | 3.95622e-27 | 1.000000 | 3.95622e-27 | 1.000000 |
| rad1           | 1.04658e-27 | 1.000000 | 1.04658e-27 | 1.000000 |
| rad10          | 7.54022e-28 | 1.000000 | 7.54022e-28 | 1.000000 |
| rad7           | 3.59460e-28 | 1.000000 | 3.59460e-28 | 1.000000 |
| rad9           | 1.14047e-28 | 1.000000 | 1.14047e-28 | 1.000000 |
| rad11          | 8.90154e-29 | 1.000000 | 8.90154e-29 | 1.000000 |
| rad3           | 7.11283e-29 | 1.000000 | 7.11283e-29 | 1.000000 |
| rad4           | 3.73399e-29 | 1.000000 | 3.73399e-29 | 1.000000 |
| rad47          | 1.61685e-29 | 1.000000 | 1.61685e-29 | 1.000000 |
| rad13          | 2.04749e-30 | 1.000000 | 2.04749e-30 | 1.000000 |
| rad31          | 1.03180e-31 | 1.000000 | 1.03180e-31 | 1.000000 |
| rad15          | 5.14434e-32 | 1.000000 | 5.14434e-32 | 1.000000 |
| rad14          | 1.82821e-32 | 1.000000 | 1.82821e-32 | 1.000000 |
| rad27          | 1.03406e-32 | 1.000000 | 1.03406e-32 | 1.000000 |
| rad33          | 3.98442e-33 | 1.000000 | 3.98442e-33 | 1.000000 |
| rad25          | 3.85130e-33 | 1.000000 | 3.85130e-33 | 1.000000 |
| rad19syn       | 3.27847e-34 | 1.000000 | 3.27847e-34 | 1.000000 |
| rad23          | 2.83370e-34 | 1.000000 | 2.83370e-34 | 1.000000 |
| rad5           | 1.32021e-35 | 1.000000 | 1.32021e-35 | 1.000000 |
| rad45          | 2.08068e-36 | 1.000000 | 2.08068e-36 | 1.000000 |
| rad12          | 6.70541e-37 | 1.000000 | 6.70541e-37 | 1.000000 |
| rad36          | 1.33588e-37 | 1.000000 | 1.33588e-37 | 1.000000 |
| rad20          | 4.34357e-38 | 1.000000 | 4.34357e-38 | 1.000000 |
| rad21          | 3.47441e-38 | 1.000000 | 3.47441e-38 | 1.000000 |
| rad22          | 3.03106e-38 | 1.000000 | 3.03106e-38 | 1.000000 |
| rad18          | 1.66622e-40 | 1.000000 | 1.66622e-40 | 1.000000 |
| rad24          | 2.18800e-43 | 1.000000 | 2.18800e-43 | 1.000000 |
| rad8           | 9.13986e-60 | 1.000000 | 9.13986e-60 | 1.000000 |

0.100000000E-03 Pa, 280.000000 K

| Rate constant             | True (fraction)        | Effective (fraction)   |
|---------------------------|------------------------|------------------------|
| Total                     | 3.52572e-14 (1.00 )    | 3.52572e-14 (1.00 )    |
| Formation of rad19        | 3.52244e-14 (0.999 )   | 3.52244e-14 (0.999 )   |
| H-abstraction to cyc2enyl | 3.26639e-17 (0.000926) | 3.26639e-17 (0.000926) |
| H-abstraction to cyclenyl | 9.42926e-20 (2.67e-06) | 9.42926e-20 (2.67e-06) |

| species                       | PYtrue      | Cumul    | PYeffective | Cumul    |
|-------------------------------|-------------|----------|-------------|----------|
| Indene+H                      | 0.998535    | 0.998535 | 0.998535    | 0.998535 |
| Benzene+cycloprop-2-enylidene | 0.000926445 | 0.999462 | 0.000926445 | 0.999462 |
| PhCHCCH2+H                    | 0.000504654 | 0.999966 | 0.000504654 | 0.999966 |
| PhCCH+CH3                     | 9.09037e-06 | 0.999976 | 9.09037e-06 | 0.999976 |

|                               |             |          |             |          |
|-------------------------------|-------------|----------|-------------|----------|
| C2H2+PhCH2                    | 7.97754e-06 | 0.999984 | 7.97754e-06 | 0.999984 |
| PhCCCH3+H                     | 5.68676e-06 | 0.999989 | 5.68676e-06 | 0.999989 |
| Ph+MeAc                       | 5.25697e-06 | 0.999994 | 5.25697e-06 | 0.999994 |
| Benzene+cycloprop-1-enylidene | 2.67442e-06 | 0.999997 | 2.67442e-06 | 0.999997 |
| rad67                         | 1.51340e-06 | 0.999999 | 1.51340e-06 | 0.999999 |
| Ph+Allene                     | 7.29445e-07 | 0.999999 | 7.29445e-07 | 0.999999 |
| rad35                         | 6.39046e-07 | 1.00000  | 6.39046e-07 | 1.00000  |
| PhCH2CCH+H                    | 1.17908e-07 | 1.00000  | 1.17908e-07 | 1.00000  |
| PAH7+H                        | 7.46287e-08 | 1.00000  | 7.46287e-08 | 1.00000  |
| rad37                         | 2.11093e-08 | 1.00000  | 2.11093e-08 | 1.00000  |
| rad39                         | 2.09521e-08 | 1.00000  | 2.09521e-08 | 1.00000  |
| rad30                         | 1.24940e-08 | 1.00000  | 1.24940e-08 | 1.00000  |
| PAH9+H                        | 1.18522e-09 | 1.00000  | 1.18522e-09 | 1.00000  |
| rad38                         | 5.96835e-10 | 1.00000  | 5.96835e-10 | 1.00000  |
| PhcycC3H3_A+H                 | 1.74264e-10 | 1.00000  | 1.74264e-10 | 1.00000  |
| PAH10+CH3                     | 1.33029e-10 | 1.00000  | 1.33029e-10 | 1.00000  |
| rad60syn                      | 8.87605e-11 | 1.00000  | 8.87605e-11 | 1.00000  |
| PAH3+H                        | 6.61334e-11 | 1.00000  | 6.61334e-11 | 1.00000  |
| rad60anti                     | 4.52856e-11 | 1.00000  | 4.52856e-11 | 1.00000  |
| rad46                         | 4.03794e-11 | 1.00000  | 4.03794e-11 | 1.00000  |
| rad59                         | 1.23862e-11 | 1.00000  | 1.23862e-11 | 1.00000  |
| rad54                         | 4.83280e-12 | 1.00000  | 4.83280e-12 | 1.00000  |
| PhcycC3H3_B+H                 | 4.15199e-12 | 1.00000  | 4.15199e-12 | 1.00000  |
| rad43                         | 4.04946e-12 | 1.00000  | 4.04946e-12 | 1.00000  |
| Phenyl+cycC3H4                | 3.74742e-12 | 1.00000  | 0.00000     | 1.00000  |
| rad62                         | 9.02851e-13 | 1.00000  | 9.02851e-13 | 1.00000  |
| rad50                         | 6.64057e-13 | 1.00000  | 6.64057e-13 | 1.00000  |
| rad70                         | 1.84257e-13 | 1.00000  | 1.84257e-13 | 1.00000  |
| PAH1+H                        | 1.17038e-13 | 1.00000  | 1.17038e-13 | 1.00000  |
| rad55                         | 8.11644e-14 | 1.00000  | 8.11644e-14 | 1.00000  |
| rad52                         | 8.29194e-15 | 1.00000  | 8.29194e-15 | 1.00000  |
| rad58                         | 6.70136e-15 | 1.00000  | 6.70136e-15 | 1.00000  |
| rad34                         | 6.68462e-15 | 1.00000  | 6.68462e-15 | 1.00000  |
| rad51                         | 4.46575e-15 | 1.00000  | 4.46575e-15 | 1.00000  |
| rad41                         | 1.89783e-15 | 1.00000  | 1.89783e-15 | 1.00000  |
| rad42                         | 1.03571e-15 | 1.00000  | 1.03571e-15 | 1.00000  |
| rad65                         | 1.21961e-16 | 1.00000  | 1.21961e-16 | 1.00000  |
| rad53                         | 4.97916e-17 | 1.00000  | 4.97916e-17 | 1.00000  |
| rad64                         | 1.74395e-17 | 1.00000  | 1.74395e-17 | 1.00000  |
| rad61                         | 7.53772e-18 | 1.00000  | 7.53772e-18 | 1.00000  |
| rad56                         | 7.36381e-19 | 1.00000  | 7.36381e-19 | 1.00000  |
| rad68syn                      | 9.83166e-20 | 1.00000  | 9.83166e-20 | 1.00000  |
| rad68anti                     | 7.23593e-20 | 1.00000  | 7.23593e-20 | 1.00000  |
| rad40syn                      | 2.31284e-21 | 1.00000  | 2.31284e-21 | 1.00000  |
| rad40anti                     | 1.83329e-21 | 1.00000  | 1.83329e-21 | 1.00000  |
| PAH8+H                        | 6.12419e-22 | 1.00000  | 6.12419e-22 | 1.00000  |
| rad73                         | 9.50002e-23 | 1.00000  | 9.50002e-23 | 1.00000  |
| rad6                          | 9.12160e-24 | 1.00000  | 9.12160e-24 | 1.00000  |
| rad71                         | 1.44433e-24 | 1.00000  | 1.44433e-24 | 1.00000  |
| rad19anti                     | 3.59346e-25 | 1.00000  | 3.59346e-25 | 1.00000  |
| rad2                          | 2.96924e-26 | 1.00000  | 2.96924e-26 | 1.00000  |
| rad26                         | 7.13160e-27 | 1.00000  | 7.13160e-27 | 1.00000  |
| rad28                         | 6.80214e-27 | 1.00000  | 6.80214e-27 | 1.00000  |
| rad1                          | 2.19844e-27 | 1.00000  | 2.19844e-27 | 1.00000  |
| rad10                         | 1.56569e-27 | 1.00000  | 1.56569e-27 | 1.00000  |
| rad7                          | 6.89850e-28 | 1.00000  | 6.89850e-28 | 1.00000  |
| rad9                          | 3.93504e-28 | 1.00000  | 3.93504e-28 | 1.00000  |
| rad11                         | 1.70927e-28 | 1.00000  | 1.70927e-28 | 1.00000  |
| rad3                          | 1.46170e-28 | 1.00000  | 1.46170e-28 | 1.00000  |
| rad4                          | 7.70430e-29 | 1.00000  | 7.70430e-29 | 1.00000  |
| rad47                         | 1.94127e-29 | 1.00000  | 1.94127e-29 | 1.00000  |
| rad13                         | 3.93897e-30 | 1.00000  | 3.93897e-30 | 1.00000  |
| rad31                         | 3.20753e-31 | 1.00000  | 3.20753e-31 | 1.00000  |
| rad15                         | 1.77973e-31 | 1.00000  | 1.77973e-31 | 1.00000  |
| rad14                         | 3.07336e-32 | 1.00000  | 3.07336e-32 | 1.00000  |
| rad27                         | 1.94916e-32 | 1.00000  | 1.94916e-32 | 1.00000  |
| rad33                         | 7.68610e-33 | 1.00000  | 7.68610e-33 | 1.00000  |
| rad25                         | 5.46703e-33 | 1.00000  | 5.46703e-33 | 1.00000  |
| rad19syn                      | 1.48909e-33 | 1.00000  | 1.48909e-33 | 1.00000  |
| rad23                         | 1.24679e-33 | 1.00000  | 1.24679e-33 | 1.00000  |
| rad5                          | 1.23857e-35 | 1.00000  | 1.23857e-35 | 1.00000  |
| rad45                         | 9.31410e-36 | 1.00000  | 9.31410e-36 | 1.00000  |
| rad12                         | 2.34556e-36 | 1.00000  | 2.34556e-36 | 1.00000  |
| rad36                         | 6.02245e-37 | 1.00000  | 6.02245e-37 | 1.00000  |
| rad22                         | 1.27731e-37 | 1.00000  | 1.27731e-37 | 1.00000  |
| rad20                         | 8.89354e-38 | 1.00000  | 8.89354e-38 | 1.00000  |
| rad21                         | 7.10995e-38 | 1.00000  | 7.10995e-38 | 1.00000  |
| rad18                         | 3.43044e-40 | 1.00000  | 3.43044e-40 | 1.00000  |
| rad24                         | 5.51408e-43 | 1.00000  | 5.51408e-43 | 1.00000  |
| rad8                          | 1.82569e-59 | 1.00000  | 1.82569e-59 | 1.00000  |

0.100000000E-03 Pa, 290.000000 K

=====

| Rate constant             | True (fraction)        | Effective (fraction)   |
|---------------------------|------------------------|------------------------|
| Total                     | 3.81171e-14 (1.00 )    | 3.81171e-14 (1.00 )    |
| Formation of rad19        | 3.80733e-14 (0.999 )   | 3.80733e-14 (0.999 )   |
| H-abstraction to cyc2enyl | 4.36868e-17 (0.00115 ) | 4.36868e-17 (0.00115 ) |
| H-abstraction to cyclenyl | 1.56861e-19 (4.12e-06) | 1.56861e-19 (4.12e-06) |

| species                       | PYtrue      | Cumul    | PYeffective | Cumul    |
|-------------------------------|-------------|----------|-------------|----------|
| Indene+H                      | 0.998282    | 0.998282 | 0.998282    | 0.998282 |
| Benzene+cycloprop-2-enylidene | 0.00114612  | 0.999429 | 0.00114612  | 0.999429 |
| PhCHCCH2+H                    | 0.000533552 | 0.999962 | 0.000533552 | 0.999962 |
| PhCCH+CH3                     | 9.61276e-06 | 0.999972 | 9.61276e-06 | 0.999972 |
| C2H2+PhCH2                    | 8.57171e-06 | 0.999980 | 8.57171e-06 | 0.999980 |
| PhCCCH3+H                     | 6.06370e-06 | 0.999986 | 6.06370e-06 | 0.999986 |
| Ph+MeAc                       | 5.68749e-06 | 0.999992 | 5.68749e-06 | 0.999992 |
| Benzene+cycloprop-1-enylidene | 4.11523e-06 | 0.999996 | 4.11523e-06 | 0.999996 |
| rad67                         | 1.63346e-06 | 0.999998 | 1.63346e-06 | 0.999998 |
| Ph+Allene                     | 8.15836e-07 | 0.999999 | 8.15836e-07 | 0.999999 |
| rad35                         | 6.87689e-07 | 0.999999 | 6.87689e-07 | 0.999999 |
| PhCH2CCH+H                    | 1.34348e-07 | 0.999999 | 1.34348e-07 | 0.999999 |
| PAH7+H                        | 8.20057e-08 | 0.999999 | 8.20057e-08 | 0.999999 |
| rad37                         | 2.33285e-08 | 1.000000 | 2.33285e-08 | 1.000000 |
| rad39                         | 2.30000e-08 | 1.000000 | 2.30000e-08 | 1.000000 |
| rad30                         | 1.35042e-08 | 1.000000 | 1.35042e-08 | 1.000000 |
| PAH9+H                        | 1.31606e-09 | 1.000000 | 1.31606e-09 | 1.000000 |
| rad38                         | 6.71986e-10 | 1.000000 | 6.71986e-10 | 1.000000 |
| PhcycC3H3_A+H                 | 2.32248e-10 | 1.000000 | 2.32248e-10 | 1.000000 |
| PAH10+CH3                     | 1.62716e-10 | 1.000000 | 1.62716e-10 | 1.000000 |
| rad60syn                      | 9.92285e-11 | 1.000000 | 9.92285e-11 | 1.000000 |
| PAH3+H                        | 7.70955e-11 | 1.000000 | 7.70955e-11 | 1.000000 |
| rad60anti                     | 5.07757e-11 | 1.000000 | 5.07757e-11 | 1.000000 |
| rad46                         | 4.57746e-11 | 1.000000 | 4.57746e-11 | 1.000000 |
| rad59                         | 1.43338e-11 | 1.000000 | 1.43338e-11 | 1.000000 |
| PhcycC3H3_B+H                 | 6.32701e-12 | 1.000000 | 6.32701e-12 | 1.000000 |
| rad54                         | 5.90855e-12 | 1.000000 | 5.90855e-12 | 1.000000 |
| Phenyl+cycC3H4                | 5.36584e-12 | 1.000000 | 0.000000    | 1.000000 |
| rad43                         | 4.80968e-12 | 1.000000 | 4.80968e-12 | 1.000000 |
| rad62                         | 1.07018e-12 | 1.000000 | 1.07018e-12 | 1.000000 |
| rad50                         | 8.00593e-13 | 1.000000 | 8.00593e-13 | 1.000000 |
| rad70                         | 2.35806e-13 | 1.000000 | 2.35806e-13 | 1.000000 |
| PAH1+H                        | 1.57376e-13 | 1.000000 | 1.57376e-13 | 1.000000 |
| rad55                         | 1.03708e-13 | 1.000000 | 1.03708e-13 | 1.000000 |
| rad52                         | 1.04175e-14 | 1.000000 | 1.04175e-14 | 1.000000 |
| rad34                         | 9.02820e-15 | 1.000000 | 9.02820e-15 | 1.000000 |
| rad58                         | 8.77577e-15 | 1.000000 | 8.77577e-15 | 1.000000 |
| rad51                         | 5.86069e-15 | 1.000000 | 5.86069e-15 | 1.000000 |
| rad41                         | 2.59126e-15 | 1.000000 | 2.59126e-15 | 1.000000 |
| rad42                         | 1.37913e-15 | 1.000000 | 1.37913e-15 | 1.000000 |
| rad65                         | 1.62087e-16 | 1.000000 | 1.62087e-16 | 1.000000 |
| rad53                         | 7.76871e-17 | 1.000000 | 7.76871e-17 | 1.000000 |
| rad64                         | 2.79836e-17 | 1.000000 | 2.79836e-17 | 1.000000 |
| rad61                         | 1.33318e-17 | 1.000000 | 1.33318e-17 | 1.000000 |
| rad56                         | 1.35815e-18 | 1.000000 | 1.35815e-18 | 1.000000 |
| rad68syn                      | 1.83483e-19 | 1.000000 | 1.83483e-19 | 1.000000 |
| rad68anti                     | 1.34481e-19 | 1.000000 | 1.34481e-19 | 1.000000 |
| rad40syn                      | 4.85493e-21 | 1.000000 | 4.85493e-21 | 1.000000 |
| rad40anti                     | 3.84148e-21 | 1.000000 | 3.84148e-21 | 1.000000 |
| PAH8+H                        | 1.38965e-21 | 1.000000 | 1.38965e-21 | 1.000000 |
| rad73                         | 2.01862e-22 | 1.000000 | 2.01862e-22 | 1.000000 |
| rad6                          | 1.87444e-23 | 1.000000 | 1.87444e-23 | 1.000000 |
| rad71                         | 3.38824e-24 | 1.000000 | 3.38824e-24 | 1.000000 |
| rad19anti                     | 1.34357e-24 | 1.000000 | 1.34357e-24 | 1.000000 |
| rad2                          | 6.37336e-26 | 1.000000 | 6.37336e-26 | 1.000000 |
| rad26                         | 1.29510e-26 | 1.000000 | 1.29510e-26 | 1.000000 |
| rad28                         | 1.24758e-26 | 1.000000 | 1.24758e-26 | 1.000000 |
| rad1                          | 4.79103e-27 | 1.000000 | 4.79103e-27 | 1.000000 |
| rad10                         | 3.36980e-27 | 1.000000 | 3.36980e-27 | 1.000000 |
| rad7                          | 1.42150e-27 | 1.000000 | 1.42150e-27 | 1.000000 |
| rad9                          | 1.38704e-27 | 1.000000 | 1.38704e-27 | 1.000000 |
| rad11                         | 3.52397e-28 | 1.000000 | 3.52397e-28 | 1.000000 |
| rad3                          | 3.11648e-28 | 1.000000 | 3.11648e-28 | 1.000000 |
| rad4                          | 1.64974e-28 | 1.000000 | 1.64974e-28 | 1.000000 |
| rad47                         | 2.37557e-29 | 1.000000 | 2.37557e-29 | 1.000000 |
| rad13                         | 8.13737e-30 | 1.000000 | 8.13737e-30 | 1.000000 |
| rad31                         | 1.01792e-30 | 1.000000 | 1.01792e-30 | 1.000000 |
| rad15                         | 6.29062e-31 | 1.000000 | 6.29062e-31 | 1.000000 |



|          |             |          |             |          |
|----------|-------------|----------|-------------|----------|
| rad14    | 5.46952e-32 | 1.000000 | 5.46952e-32 | 1.000000 |
| rad27    | 3.83116e-32 | 1.000000 | 3.83116e-32 | 1.000000 |
| rad33    | 1.59225e-32 | 1.000000 | 1.59225e-32 | 1.000000 |
| rad25    | 8.68043e-33 | 1.000000 | 8.68043e-33 | 1.000000 |
| rad19syn | 6.95957e-33 | 1.000000 | 6.95957e-33 | 1.000000 |
| rad23    | 5.74775e-33 | 1.000000 | 5.74775e-33 | 1.000000 |
| rad45    | 4.39260e-35 | 1.000000 | 4.39260e-35 | 1.000000 |
| rad5     | 1.16484e-35 | 1.000000 | 1.16484e-35 | 1.000000 |
| rad12    | 8.40684e-36 | 1.000000 | 8.40684e-36 | 1.000000 |
| rad36    | 2.86220e-36 | 1.000000 | 2.86220e-36 | 1.000000 |
| rad22    | 5.63154e-37 | 1.000000 | 5.63154e-37 | 1.000000 |
| rad20    | 1.97350e-37 | 1.000000 | 1.97350e-37 | 1.000000 |
| rad21    | 1.57897e-37 | 1.000000 | 1.57897e-37 | 1.000000 |
| rad18    | 7.62879e-40 | 1.000000 | 7.62879e-40 | 1.000000 |
| rad24    | 1.73827e-42 | 1.000000 | 1.73827e-42 | 1.000000 |
| rad8     | 3.73734e-59 | 1.000000 | 3.73734e-59 | 1.000000 |

0.100000000E-03 Pa, 300.000000 K

| Rate constant             | True (fraction)        | Effective (fraction)   |
|---------------------------|------------------------|------------------------|
| Total                     | 5.34809e-14 (1.00 )    | 5.34809e-14 (1.00 )    |
| Formation of rad19        | 5.34010e-14 (0.999 )   | 5.34010e-14 (0.999 )   |
| H-abstraction to cyc2enyl | 7.95823e-17 (0.00149 ) | 7.95823e-17 (0.00149 ) |
| H-abstraction to cyclenyl | 3.44981e-19 (6.45e-06) | 3.44981e-19 (6.45e-06) |

| species                       | PYtrue      | Cumul    | PYeffective | Cumul    |
|-------------------------------|-------------|----------|-------------|----------|
| Indene+H                      | 0.997939    | 0.997939 | 0.997939    | 0.997939 |
| Benzene+cycloprop-2-enylidene | 0.00148805  | 0.999427 | 0.00148805  | 0.999427 |
| PhCHCCH2+H                    | 0.000529814 | 0.999957 | 0.000529814 | 0.999957 |
| PhCCH+CH3                     | 1.04615e-05 | 0.999968 | 1.04615e-05 | 0.999968 |
| C2H2+PhCH2                    | 9.96264e-06 | 0.999978 | 9.96264e-06 | 0.999978 |
| Benzene+cycloprop-1-enylidene | 6.45054e-06 | 0.999984 | 6.45054e-06 | 0.999984 |
| PhCCH3+H                      | 6.36715e-06 | 0.999990 | 6.36715e-06 | 0.999990 |
| Ph+MeAc                       | 5.99826e-06 | 0.999996 | 5.99826e-06 | 0.999996 |
| rad67                         | 1.76909e-06 | 0.999998 | 1.76909e-06 | 0.999998 |
| Ph+Allene                     | 8.18993e-07 | 0.999999 | 8.18993e-07 | 0.999999 |
| rad35                         | 7.31807e-07 | 1.000000 | 7.31807e-07 | 1.000000 |
| PhCH2CCH+H                    | 1.62469e-07 | 1.000000 | 1.62469e-07 | 1.000000 |
| PAH7+H                        | 1.00666e-07 | 1.000000 | 1.00666e-07 | 1.000000 |
| rad37                         | 2.83206e-08 | 1.000000 | 2.83206e-08 | 1.000000 |
| rad39                         | 2.48351e-08 | 1.000000 | 2.48351e-08 | 1.000000 |
| rad30                         | 1.39398e-08 | 1.000000 | 1.39398e-08 | 1.000000 |
| PAH9+H                        | 1.67897e-09 | 1.000000 | 1.67897e-09 | 1.000000 |
| rad38                         | 7.72651e-10 | 1.000000 | 7.72651e-10 | 1.000000 |
| PhcycC3H3_A+H                 | 3.25290e-10 | 1.000000 | 3.25290e-10 | 1.000000 |
| PAH10+CH3                     | 2.37266e-10 | 1.000000 | 2.37266e-10 | 1.000000 |
| rad60syn                      | 1.06834e-10 | 1.000000 | 1.06834e-10 | 1.000000 |
| PAH3+H                        | 9.84715e-11 | 1.000000 | 9.84715e-11 | 1.000000 |
| rad60anti                     | 5.51572e-11 | 1.000000 | 5.51572e-11 | 1.000000 |
| rad46                         | 5.45643e-11 | 1.000000 | 5.45643e-11 | 1.000000 |
| rad59                         | 1.67258e-11 | 1.000000 | 1.67258e-11 | 1.000000 |
| PhcycC3H3_B+H                 | 1.05896e-11 | 1.000000 | 1.05896e-11 | 1.000000 |
| Phenyl+cycC3H4                | 8.20984e-12 | 1.000000 | 0.000000    | 1.000000 |
| rad54                         | 7.66780e-12 | 1.000000 | 7.66780e-12 | 1.000000 |
| rad43                         | 5.65557e-12 | 1.000000 | 5.65557e-12 | 1.000000 |
| rad62                         | 1.25276e-12 | 1.000000 | 1.25276e-12 | 1.000000 |
| rad50                         | 1.03315e-12 | 1.000000 | 1.03315e-12 | 1.000000 |
| rad70                         | 3.13392e-13 | 1.000000 | 3.13392e-13 | 1.000000 |
| PAH1+H                        | 1.93779e-13 | 1.000000 | 1.93779e-13 | 1.000000 |
| rad55                         | 1.33842e-13 | 1.000000 | 1.33842e-13 | 1.000000 |
| rad52                         | 1.45720e-14 | 1.000000 | 1.45720e-14 | 1.000000 |
| rad34                         | 1.28521e-14 | 1.000000 | 1.28521e-14 | 1.000000 |
| rad58                         | 1.11204e-14 | 1.000000 | 1.11204e-14 | 1.000000 |
| rad51                         | 8.23950e-15 | 1.000000 | 8.23950e-15 | 1.000000 |
| rad41                         | 3.58185e-15 | 1.000000 | 3.58185e-15 | 1.000000 |
| rad42                         | 1.81926e-15 | 1.000000 | 1.81926e-15 | 1.000000 |
| rad65                         | 2.32648e-16 | 1.000000 | 2.32648e-16 | 1.000000 |
| rad53                         | 1.29481e-16 | 1.000000 | 1.29481e-16 | 1.000000 |
| rad64                         | 4.98973e-17 | 1.000000 | 4.98973e-17 | 1.000000 |
| rad61                         | 2.74862e-17 | 1.000000 | 2.74862e-17 | 1.000000 |
| rad56                         | 3.01521e-18 | 1.000000 | 3.01521e-18 | 1.000000 |
| rad68syn                      | 3.96643e-19 | 1.000000 | 3.96643e-19 | 1.000000 |
| rad68anti                     | 2.85688e-19 | 1.000000 | 2.85688e-19 | 1.000000 |
| rad6                          | 2.13746e-20 | 1.000000 | 2.13746e-20 | 1.000000 |
| rad19anti                     | 1.46847e-20 | 1.000000 | 1.46847e-20 | 1.000000 |
| rad40syn                      | 1.34588e-20 | 1.000000 | 1.34588e-20 | 1.000000 |
| rad40anti                     | 1.02810e-20 | 1.000000 | 1.02810e-20 | 1.000000 |
| PAH8+H                        | 5.53972e-21 | 1.000000 | 5.53972e-21 | 1.000000 |

|          |             |         |             |         |
|----------|-------------|---------|-------------|---------|
| rad73    | 6.54843e-22 | 1.00000 | 6.54843e-22 | 1.00000 |
| rad2     | 4.90575e-22 | 1.00000 | 4.90575e-22 | 1.00000 |
| rad9     | 6.25229e-23 | 1.00000 | 6.25229e-23 | 1.00000 |
| rad1     | 3.69667e-23 | 1.00000 | 3.69667e-23 | 1.00000 |
| rad26    | 3.02211e-23 | 1.00000 | 3.02211e-23 | 1.00000 |
| rad10    | 2.95343e-23 | 1.00000 | 2.95343e-23 | 1.00000 |
| rad71    | 2.13406e-23 | 1.00000 | 2.13406e-23 | 1.00000 |
| rad28    | 1.59398e-23 | 1.00000 | 1.59398e-23 | 1.00000 |
| rad3     | 3.75376e-24 | 1.00000 | 3.75376e-24 | 1.00000 |
| rad7     | 1.89616e-24 | 1.00000 | 1.89616e-24 | 1.00000 |
| rad4     | 1.86676e-24 | 1.00000 | 1.86676e-24 | 1.00000 |
| rad11    | 4.55446e-25 | 1.00000 | 4.55446e-25 | 1.00000 |
| rad23    | 1.91553e-25 | 1.00000 | 1.91553e-25 | 1.00000 |
| rad15    | 3.72106e-26 | 1.00000 | 3.72106e-26 | 1.00000 |
| rad13    | 1.09357e-26 | 1.00000 | 1.09357e-26 | 1.00000 |
| rad31    | 9.66328e-27 | 1.00000 | 9.66328e-27 | 1.00000 |
| rad45    | 3.04785e-27 | 1.00000 | 3.04785e-27 | 1.00000 |
| rad19syn | 1.12386e-27 | 1.00000 | 1.12386e-27 | 1.00000 |
| rad14    | 3.76107e-28 | 1.00000 | 3.76107e-28 | 1.00000 |
| rad25    | 3.73269e-28 | 1.00000 | 3.73269e-28 | 1.00000 |
| rad27    | 3.08022e-28 | 1.00000 | 3.08022e-28 | 1.00000 |
| rad47    | 1.77283e-28 | 1.00000 | 1.77283e-28 | 1.00000 |
| rad36    | 1.03881e-28 | 1.00000 | 1.03881e-28 | 1.00000 |
| rad33    | 2.75172e-29 | 1.00000 | 2.75172e-29 | 1.00000 |
| rad22    | 2.35343e-29 | 1.00000 | 2.35343e-29 | 1.00000 |
| rad12    | 1.04931e-29 | 1.00000 | 1.04931e-29 | 1.00000 |
| rad5     | 5.86474e-30 | 1.00000 | 5.86474e-30 | 1.00000 |
| rad72    | 4.67175e-30 | 1.00000 | 4.67175e-30 | 1.00000 |
| rad21    | 1.15710e-31 | 1.00000 | 1.15710e-31 | 1.00000 |
| rad20    | 7.09709e-32 | 1.00000 | 7.09709e-32 | 1.00000 |
| rad18    | 1.38846e-33 | 1.00000 | 1.38846e-33 | 1.00000 |
| rad24    | 7.34839e-35 | 1.00000 | 7.34839e-35 | 1.00000 |
| rad8     | 3.04180e-45 | 1.00000 | 3.04180e-45 | 1.00000 |

0.100000000E-03 Pa, 310.000000 K

=====

| Rate constant             | True (fraction)        | Effective (fraction)   |
|---------------------------|------------------------|------------------------|
| Total                     | 5.92544e-14 (1.00 )    | 5.92544e-14 (1.00 )    |
| Formation of rad19        | 5.91462e-14 (0.998 )   | 5.91462e-14 (0.998 )   |
| H-abstraction to cyc2enyl | 1.07628e-16 (0.00182 ) | 1.07628e-16 (0.00182 ) |
| H-abstraction to cyclenyl | 5.62537e-19 (9.49e-06) | 5.62537e-19 (9.49e-06) |

| species                       | PYtrue      | Cumul    | PYeffective | Cumul    |
|-------------------------------|-------------|----------|-------------|----------|
| Indene+H                      | 0.997536    | 0.997536 | 0.997536    | 0.997536 |
| Benzene+cycloprop-2-enylidene | 0.00181637  | 0.999353 | 0.00181637  | 0.999353 |
| PhCHCCH2+H                    | 0.000599213 | 0.999952 | 0.000599213 | 0.999952 |
| PhCCH+CH3                     | 1.07899e-05 | 0.999963 | 1.07899e-05 | 0.999963 |
| C2H2+PhCH2                    | 9.94972e-06 | 0.999973 | 9.94972e-06 | 0.999973 |
| Benzene+cycloprop-1-enylidene | 9.49359e-06 | 0.999982 | 9.49359e-06 | 0.999982 |
| PhCCCH3+H                     | 6.92725e-06 | 0.999989 | 6.92725e-06 | 0.999989 |
| Ph+MeAc                       | 6.69436e-06 | 0.999996 | 6.69436e-06 | 0.999996 |
| rad67                         | 1.91404e-06 | 0.999998 | 1.91404e-06 | 0.999998 |
| Ph+Allene                     | 1.02854e-06 | 0.999999 | 1.02854e-06 | 0.999999 |
| rad35                         | 8.00938e-07 | 0.999999 | 8.00938e-07 | 0.999999 |
| PhCH2CCH+H                    | 1.75896e-07 | 1.000000 | 1.75896e-07 | 1.000000 |
| PAH7+H                        | 9.96914e-08 | 1.000000 | 9.96914e-08 | 1.000000 |
| rad37                         | 2.86985e-08 | 1.000000 | 2.86985e-08 | 1.000000 |
| rad39                         | 2.78944e-08 | 1.000000 | 2.78944e-08 | 1.000000 |
| rad30                         | 1.58794e-08 | 1.000000 | 1.58794e-08 | 1.000000 |
| PAH9+H                        | 1.63684e-09 | 1.000000 | 1.63684e-09 | 1.000000 |
| rad38                         | 8.60334e-10 | 1.000000 | 8.60334e-10 | 1.000000 |
| PhcycC3H3_A+H                 | 4.09102e-10 | 1.000000 | 4.09102e-10 | 1.000000 |
| PAH10+CH3                     | 2.45221e-10 | 1.000000 | 2.45221e-10 | 1.000000 |
| rad60syn                      | 1.25085e-10 | 1.000000 | 1.25085e-10 | 1.000000 |
| PAH3+H                        | 1.05828e-10 | 1.000000 | 1.05828e-10 | 1.000000 |
| rad60anti                     | 6.43937e-11 | 1.000000 | 6.43937e-11 | 1.000000 |
| rad46                         | 5.94067e-11 | 1.000000 | 5.94067e-11 | 1.000000 |
| rad59                         | 1.93817e-11 | 1.000000 | 1.93817e-11 | 1.000000 |
| PhcycC3H3_B+H                 | 1.41415e-11 | 1.000000 | 1.41415e-11 | 1.000000 |
| Phenyl+cycC3H4                | 1.07882e-11 | 1.000000 | 0.000000    | 1.000000 |
| rad54                         | 8.89601e-12 | 1.000000 | 8.89601e-12 | 1.000000 |
| rad43                         | 6.83075e-12 | 1.000000 | 6.83075e-12 | 1.000000 |
| rad62                         | 1.51159e-12 | 1.000000 | 1.51159e-12 | 1.000000 |
| rad50                         | 1.17695e-12 | 1.000000 | 1.17695e-12 | 1.000000 |
| rad70                         | 3.87562e-13 | 1.000000 | 3.87562e-13 | 1.000000 |
| PAH1+H                        | 2.83536e-13 | 1.000000 | 2.83536e-13 | 1.000000 |
| rad55                         | 1.69857e-13 | 1.000000 | 1.69857e-13 | 1.000000 |
| rad52                         | 1.66060e-14 | 1.000000 | 1.66060e-14 | 1.000000 |

|           |             |          |             |          |
|-----------|-------------|----------|-------------|----------|
| rad34     | 1.64057e-14 | 1.000000 | 1.64057e-14 | 1.000000 |
| rad58     | 1.50872e-14 | 1.000000 | 1.50872e-14 | 1.000000 |
| rad51     | 1.01582e-14 | 1.000000 | 1.01582e-14 | 1.000000 |
| rad41     | 4.78440e-15 | 1.000000 | 4.78440e-15 | 1.000000 |
| rad42     | 2.42635e-15 | 1.000000 | 2.42635e-15 | 1.000000 |
| rad65     | 2.87408e-16 | 1.000000 | 2.87408e-16 | 1.000000 |
| rad53     | 1.82135e-16 | 1.000000 | 1.82135e-16 | 1.000000 |
| rad64     | 6.86550e-17 | 1.000000 | 6.86550e-17 | 1.000000 |
| rad61     | 3.85257e-17 | 1.000000 | 3.85257e-17 | 1.000000 |
| rad56     | 4.20809e-18 | 1.000000 | 4.20809e-18 | 1.000000 |
| rad68syn  | 5.79182e-19 | 1.000000 | 5.79182e-19 | 1.000000 |
| rad68anti | 4.21602e-19 | 1.000000 | 4.21602e-19 | 1.000000 |
| rad40syn  | 1.84909e-20 | 1.000000 | 1.84909e-20 | 1.000000 |
| rad40anti | 1.45861e-20 | 1.000000 | 1.45861e-20 | 1.000000 |
| PAH8+H    | 5.99118e-21 | 1.000000 | 5.99118e-21 | 1.000000 |
| rad73     | 7.86974e-22 | 1.000000 | 7.86974e-22 | 1.000000 |
| rad6      | 9.20499e-23 | 1.000000 | 9.20499e-23 | 1.000000 |
| rad19anti | 1.86172e-23 | 1.000000 | 1.86172e-23 | 1.000000 |
| rad71     | 1.54164e-23 | 1.000000 | 1.54164e-23 | 1.000000 |
| rad2      | 3.20713e-25 | 1.000000 | 3.20713e-25 | 1.000000 |
| rad28     | 4.80182e-26 | 1.000000 | 4.80182e-26 | 1.000000 |
| rad26     | 4.65828e-26 | 1.000000 | 4.65828e-26 | 1.000000 |
| rad1      | 2.49292e-26 | 1.000000 | 2.49292e-26 | 1.000000 |
| rad9      | 1.77324e-26 | 1.000000 | 1.77324e-26 | 1.000000 |
| rad10     | 1.70529e-26 | 1.000000 | 1.70529e-26 | 1.000000 |
| rad7      | 7.02056e-27 | 1.000000 | 7.02056e-27 | 1.000000 |
| rad11     | 1.74176e-27 | 1.000000 | 1.74176e-27 | 1.000000 |
| rad3      | 1.54811e-27 | 1.000000 | 1.54811e-27 | 1.000000 |
| rad4      | 8.27366e-28 | 1.000000 | 8.27366e-28 | 1.000000 |
| rad13     | 4.04118e-29 | 1.000000 | 4.04118e-29 | 1.000000 |
| rad47     | 3.77539e-29 | 1.000000 | 3.77539e-29 | 1.000000 |
| rad31     | 1.07026e-29 | 1.000000 | 1.07026e-29 | 1.000000 |
| rad15     | 8.08877e-30 | 1.000000 | 8.08877e-30 | 1.000000 |
| rad14     | 1.96668e-31 | 1.000000 | 1.96668e-31 | 1.000000 |
| rad27     | 1.62990e-31 | 1.000000 | 1.62990e-31 | 1.000000 |
| rad19syn  | 1.62279e-31 | 1.000000 | 1.62279e-31 | 1.000000 |
| rad23     | 1.36762e-31 | 1.000000 | 1.36762e-31 | 1.000000 |
| rad33     | 7.95032e-32 | 1.000000 | 7.95032e-32 | 1.000000 |
| rad25     | 2.96858e-32 | 1.000000 | 2.96858e-32 | 1.000000 |
| rad45     | 1.11884e-33 | 1.000000 | 1.11884e-33 | 1.000000 |
| rad12     | 1.11866e-34 | 1.000000 | 1.11866e-34 | 1.000000 |
| rad36     | 7.41800e-35 | 1.000000 | 7.41800e-35 | 1.000000 |
| rad22     | 1.21654e-35 | 1.000000 | 1.21654e-35 | 1.000000 |
| rad5      | 1.03746e-35 | 1.000000 | 1.03746e-35 | 1.000000 |
| rad20     | 1.15682e-36 | 1.000000 | 1.15682e-36 | 1.000000 |
| rad21     | 9.31220e-37 | 1.000000 | 9.31220e-37 | 1.000000 |
| rad18     | 4.43525e-39 | 1.000000 | 4.43525e-39 | 1.000000 |
| rad24     | 2.84537e-41 | 1.000000 | 2.84537e-41 | 1.000000 |
| rad8      | 1.69034e-58 | 1.000000 | 1.69034e-58 | 1.000000 |

0.100000000E-03 Pa, 400.000000 K

=====

| Rate constant             | True (fraction)        | Effective (fraction)   |
|---------------------------|------------------------|------------------------|
| Total                     | 1.29463e-13 (1.00 )    | 1.29463e-13 (1.00 )    |
| Formation of rad19        | 1.28526e-13 (0.993 )   | 1.28526e-13 (0.993 )   |
| H-abstraction to cyc2enyl | 9.19357e-16 (0.00710 ) | 9.19357e-16 (0.00710 ) |
| H-abstraction to cyclenyl | 1.69485e-17 (0.000131) | 1.69485e-17 (0.000131) |

| species                       | PYtrue      | Cumul    | PYeffective | Cumul    |
|-------------------------------|-------------|----------|-------------|----------|
| Indene+H                      | 0.991683    | 0.991683 | 0.991683    | 0.991683 |
| Benzene+cycloprop-2-enylidene | 0.00710133  | 0.998784 | 0.00710133  | 0.998784 |
| PhCHCCH2+H                    | 0.00100586  | 0.999790 | 0.00100586  | 0.999790 |
| Benzene+cycloprop-1-enylidene | 0.000130914 | 0.999921 | 0.000130914 | 0.999921 |
| C2H2+PhCH2                    | 2.22468e-05 | 0.999943 | 2.22468e-05 | 0.999943 |
| PhCCH+CH3                     | 1.95098e-05 | 0.999963 | 1.95098e-05 | 0.999963 |
| Ph+MeAc                       | 1.45179e-05 | 0.999977 | 1.45179e-05 | 0.999977 |
| PhCCCH3+H                     | 1.31952e-05 | 0.999990 | 1.31952e-05 | 0.999990 |
| rad67                         | 4.22167e-06 | 0.999994 | 4.22167e-06 | 0.999994 |
| Ph+Allene                     | 2.97391e-06 | 0.999997 | 2.97391e-06 | 0.999997 |
| rad35                         | 1.68909e-06 | 0.999999 | 1.68909e-06 | 0.999999 |
| PhCH2CCH+H                    | 6.93047e-07 | 1.000000 | 6.93047e-07 | 1.000000 |
| PAH7+H                        | 2.89757e-07 | 1.000000 | 2.89757e-07 | 1.000000 |
| rad37                         | 8.82204e-08 | 1.000000 | 8.82204e-08 | 1.000000 |
| rad39                         | 7.05188e-08 | 1.000000 | 7.05188e-08 | 1.000000 |
| rad30                         | 3.41246e-08 | 1.000000 | 3.41246e-08 | 1.000000 |
| PAH9+H                        | 5.67069e-09 | 1.000000 | 5.67069e-09 | 1.000000 |
| PhcycC3H3_A+H                 | 4.88900e-09 | 1.000000 | 4.88900e-09 | 1.000000 |
| rad38                         | 3.07435e-09 | 1.000000 | 3.07435e-09 | 1.000000 |

|                |             |         |             |         |
|----------------|-------------|---------|-------------|---------|
| PAH10+CH3      | 1.94150e-09 | 1.00000 | 1.94150e-09 | 1.00000 |
| PAH3+H         | 5.34449e-10 | 1.00000 | 5.34449e-10 | 1.00000 |
| PhcycC3H3_B+H  | 4.15151e-10 | 1.00000 | 4.15151e-10 | 1.00000 |
| rad60syn       | 3.79130e-10 | 1.00000 | 3.79130e-10 | 1.00000 |
| rad46          | 2.31290e-10 | 1.00000 | 2.31290e-10 | 1.00000 |
| Phenyl+cycC3H4 | 2.22328e-10 | 1.00000 | 0.00000     | 1.00000 |
| rad60anti      | 2.01850e-10 | 1.00000 | 2.01850e-10 | 1.00000 |
| rad59          | 8.49299e-11 | 1.00000 | 8.49299e-11 | 1.00000 |
| rad54          | 6.39706e-11 | 1.00000 | 6.39706e-11 | 1.00000 |
| rad43          | 3.46932e-11 | 1.00000 | 3.46932e-11 | 1.00000 |
| rad50          | 8.28672e-12 | 1.00000 | 8.28672e-12 | 1.00000 |
| rad62          | 7.28466e-12 | 1.00000 | 7.28466e-12 | 1.00000 |
| rad70          | 3.85328e-12 | 1.00000 | 3.85328e-12 | 1.00000 |
| PAH1+H         | 3.61003e-12 | 1.00000 | 3.61003e-12 | 1.00000 |
| rad55          | 1.60055e-12 | 1.00000 | 1.60055e-12 | 1.00000 |
| rad34          | 2.43952e-13 | 1.00000 | 2.43952e-13 | 1.00000 |
| rad52          | 1.72576e-13 | 1.00000 | 1.72576e-13 | 1.00000 |
| rad58          | 1.69180e-13 | 1.00000 | 1.69180e-13 | 1.00000 |
| rad51          | 1.42864e-13 | 1.00000 | 1.42864e-13 | 1.00000 |
| rad41          | 6.83260e-14 | 1.00000 | 6.83260e-14 | 1.00000 |
| rad42          | 2.71734e-14 | 1.00000 | 2.71734e-14 | 1.00000 |
| rad53          | 6.88019e-15 | 1.00000 | 6.88019e-15 | 1.00000 |
| rad65          | 4.39173e-15 | 1.00000 | 4.39173e-15 | 1.00000 |
| rad61          | 3.43038e-15 | 1.00000 | 3.43038e-15 | 1.00000 |
| rad64          | 3.05834e-15 | 1.00000 | 3.05834e-15 | 1.00000 |
| rad56          | 5.30924e-16 | 1.00000 | 5.30924e-16 | 1.00000 |
| rad68syn       | 7.48244e-17 | 1.00000 | 7.48244e-17 | 1.00000 |
| rad68anti      | 5.24834e-17 | 1.00000 | 5.24834e-17 | 1.00000 |
| rad19anti      | 4.76697e-17 | 1.00000 | 4.76697e-17 | 1.00000 |
| rad40syn       | 6.39130e-18 | 1.00000 | 6.39130e-18 | 1.00000 |
| PAH8+H         | 5.94551e-18 | 1.00000 | 5.94551e-18 | 1.00000 |
| rad40anti      | 4.74371e-18 | 1.00000 | 4.74371e-18 | 1.00000 |
| rad6           | 4.38914e-18 | 1.00000 | 4.38914e-18 | 1.00000 |
| rad73          | 4.85677e-19 | 1.00000 | 4.85677e-19 | 1.00000 |
| rad2           | 3.88429e-19 | 1.00000 | 3.88429e-19 | 1.00000 |
| rad9           | 2.07335e-19 | 1.00000 | 2.07335e-19 | 1.00000 |
| rad71          | 4.97335e-20 | 1.00000 | 4.97335e-20 | 1.00000 |
| rad23          | 4.45517e-20 | 1.00000 | 4.45517e-20 | 1.00000 |
| rad1           | 3.61495e-20 | 1.00000 | 3.61495e-20 | 1.00000 |
| rad10          | 2.34777e-20 | 1.00000 | 2.34777e-20 | 1.00000 |
| rad26          | 4.22779e-21 | 1.00000 | 4.22779e-21 | 1.00000 |
| rad3           | 3.91942e-21 | 1.00000 | 3.91942e-21 | 1.00000 |
| rad45          | 2.97194e-21 | 1.00000 | 2.97194e-21 | 1.00000 |
| rad4           | 2.06449e-21 | 1.00000 | 2.06449e-21 | 1.00000 |
| rad28          | 1.15322e-21 | 1.00000 | 1.15322e-21 | 1.00000 |
| rad7           | 4.09253e-22 | 1.00000 | 4.09253e-22 | 1.00000 |
| rad19syn       | 2.04434e-22 | 1.00000 | 2.04434e-22 | 1.00000 |
| rad15          | 1.30933e-22 | 1.00000 | 1.30933e-22 | 1.00000 |
| rad36          | 1.14465e-22 | 1.00000 | 1.14465e-22 | 1.00000 |
| rad11          | 9.99300e-23 | 1.00000 | 9.99300e-23 | 1.00000 |
| rad31          | 5.03680e-23 | 1.00000 | 5.03680e-23 | 1.00000 |
| rad22          | 2.70215e-24 | 1.00000 | 2.70215e-24 | 1.00000 |
| rad13          | 2.49891e-24 | 1.00000 | 2.49891e-24 | 1.00000 |
| rad72          | 7.32183e-25 | 1.00000 | 7.32183e-25 | 1.00000 |
| rad27          | 4.82509e-26 | 1.00000 | 4.82509e-26 | 1.00000 |
| rad12          | 2.32912e-26 | 1.00000 | 2.32912e-26 | 1.00000 |
| rad14          | 2.00052e-26 | 1.00000 | 2.00052e-26 | 1.00000 |
| rad47          | 7.65192e-27 | 1.00000 | 7.65192e-27 | 1.00000 |
| rad33          | 6.45024e-27 | 1.00000 | 6.45024e-27 | 1.00000 |
| rad25          | 2.32767e-27 | 1.00000 | 2.32767e-27 | 1.00000 |
| rad21          | 9.81827e-30 | 1.00000 | 9.81827e-30 | 1.00000 |
| rad20          | 6.79941e-30 | 1.00000 | 6.79941e-30 | 1.00000 |
| rad5           | 4.59771e-30 | 1.00000 | 4.59771e-30 | 1.00000 |
| rad24          | 2.33239e-30 | 1.00000 | 2.33239e-30 | 1.00000 |
| rad18          | 1.07656e-31 | 1.00000 | 1.07656e-31 | 1.00000 |
| rad8           | 6.65013e-42 | 1.00000 | 6.65013e-42 | 1.00000 |

0.100000000E-03 Pa, 500.000000 K

| Rate constant             | True (fraction)        | Effective (fraction)   |
|---------------------------|------------------------|------------------------|
| Total                     | 2.52837e-13 (1.00 )    | 2.52837e-13 (1.00 )    |
| Formation of rad19        | 2.47941e-13 (0.981 )   | 2.47941e-13 (0.981 )   |
| H-abstraction to cyc2enyl | 4.69058e-15 (0.0186 )  | 4.69058e-15 (0.0186 )  |
| H-abstraction to cyc1enyl | 2.05381e-16 (0.000812) | 2.05381e-16 (0.000812) |

  

| species                       | PYtrue    | Cumul    | PYeffective | Cumul    |
|-------------------------------|-----------|----------|-------------|----------|
| Indene+H                      | 0.978428  | 0.978428 | 0.978428    | 0.978428 |
| Benzene+cycloprop-2-enylidene | 0.0185518 | 0.996979 | 0.0185518   | 0.996979 |

|                               |             |          |             |          |
|-------------------------------|-------------|----------|-------------|----------|
| PhCHCCH2+H                    | 0.00202477  | 0.999004 | 0.00202477  | 0.999004 |
| Benzene+cycloprop-1-enylidene | 0.000812306 | 0.999816 | 0.000812306 | 0.999816 |
| C2H2+PhCH2                    | 5.13363e-05 | 0.999868 | 5.13363e-05 | 0.999868 |
| PhCCH+CH3                     | 3.71182e-05 | 0.999905 | 3.71182e-05 | 0.999905 |
| Ph+MeAc                       | 3.63101e-05 | 0.999941 | 3.63101e-05 | 0.999941 |
| PhCCCH3+H                     | 2.84449e-05 | 0.999970 | 2.84449e-05 | 0.999970 |
| Ph+Allene                     | 1.09470e-05 | 0.999981 | 1.09470e-05 | 0.999981 |
| rad67                         | 1.05822e-05 | 0.999991 | 1.05822e-05 | 0.999991 |
| rad35                         | 4.10935e-06 | 0.999995 | 4.10935e-06 | 0.999995 |
| PhCH2CCH+H                    | 2.95392e-06 | 0.999998 | 2.95392e-06 | 0.999998 |
| PAH7+H                        | 8.51564e-07 | 0.999999 | 8.51564e-07 | 0.999999 |
| rad37                         | 2.86678e-07 | 0.999999 | 2.86678e-07 | 0.999999 |
| rad39                         | 2.02118e-07 | 1.000000 | 2.02118e-07 | 1.000000 |
| rad30                         | 8.94923e-08 | 1.000000 | 8.94923e-08 | 1.000000 |
| PhcycC3H3_A+H                 | 5.02850e-08 | 1.000000 | 5.02850e-08 | 1.000000 |
| PAH9+H                        | 2.06879e-08 | 1.000000 | 2.06879e-08 | 1.000000 |
| PAH10+CH3                     | 1.44052e-08 | 1.000000 | 1.44052e-08 | 1.000000 |
| rad38                         | 1.31834e-08 | 1.000000 | 1.31834e-08 | 1.000000 |
| PhcycC3H3_B+H                 | 7.81107e-09 | 1.000000 | 7.81107e-09 | 1.000000 |
| Phenyl+cycC3H4                | 3.55660e-09 | 1.000000 | 0.000000    | 1.000000 |
| PAH3+H                        | 2.97649e-09 | 1.000000 | 2.97649e-09 | 1.000000 |
| rad60syn                      | 1.43183e-09 | 1.000000 | 1.43183e-09 | 1.000000 |
| rad46                         | 1.04913e-09 | 1.000000 | 1.04913e-09 | 1.000000 |
| rad60anti                     | 7.84373e-10 | 1.000000 | 7.84373e-10 | 1.000000 |
| rad54                         | 4.68691e-10 | 1.000000 | 4.68691e-10 | 1.000000 |
| rad59                         | 4.42102e-10 | 1.000000 | 4.42102e-10 | 1.000000 |
| rad43                         | 1.96278e-10 | 1.000000 | 1.96278e-10 | 1.000000 |
| rad50                         | 6.65687e-11 | 1.000000 | 6.65687e-11 | 1.000000 |
| PAH1+H                        | 4.68911e-11 | 1.000000 | 4.68911e-11 | 1.000000 |
| rad62                         | 3.77646e-11 | 1.000000 | 3.77646e-11 | 1.000000 |
| rad70                         | 3.76454e-11 | 1.000000 | 3.76454e-11 | 1.000000 |
| rad55                         | 1.50995e-11 | 1.000000 | 1.50995e-11 | 1.000000 |
| rad34                         | 3.22092e-12 | 1.000000 | 3.22092e-12 | 1.000000 |
| rad51                         | 2.08196e-12 | 1.000000 | 2.08196e-12 | 1.000000 |
| rad58                         | 2.05092e-12 | 1.000000 | 2.05092e-12 | 1.000000 |
| rad52                         | 1.88540e-12 | 1.000000 | 1.88540e-12 | 1.000000 |
| rad41                         | 8.63972e-13 | 1.000000 | 8.63972e-13 | 1.000000 |
| rad42                         | 2.74849e-13 | 1.000000 | 2.74849e-13 | 1.000000 |
| rad53                         | 1.70507e-13 | 1.000000 | 1.70507e-13 | 1.000000 |
| rad61                         | 1.40668e-13 | 1.000000 | 1.40668e-13 | 1.000000 |
| rad64                         | 7.73135e-14 | 1.000000 | 7.73135e-14 | 1.000000 |
| rad65                         | 6.64224e-14 | 1.000000 | 6.64224e-14 | 1.000000 |
| rad56                         | 2.62115e-14 | 1.000000 | 2.62115e-14 | 1.000000 |
| rad19anti                     | 6.68018e-15 | 1.000000 | 6.68018e-15 | 1.000000 |
| rad68syn                      | 3.88259e-15 | 1.000000 | 3.88259e-15 | 1.000000 |
| rad68anti                     | 2.67414e-15 | 1.000000 | 2.67414e-15 | 1.000000 |
| PAH8+H                        | 8.47560e-16 | 1.000000 | 8.47560e-16 | 1.000000 |
| rad40syn                      | 5.55784e-16 | 1.000000 | 5.55784e-16 | 1.000000 |
| rad6                          | 5.02559e-16 | 1.000000 | 5.02559e-16 | 1.000000 |
| rad40anti                     | 4.06573e-16 | 1.000000 | 4.06573e-16 | 1.000000 |
| rad23                         | 1.55127e-16 | 1.000000 | 1.55127e-16 | 1.000000 |
| rad2                          | 1.18799e-16 | 1.000000 | 1.18799e-16 | 1.000000 |
| rad73                         | 6.83546e-17 | 1.000000 | 6.83546e-17 | 1.000000 |
| rad9                          | 5.51076e-17 | 1.000000 | 5.51076e-17 | 1.000000 |
| rad45                         | 2.40844e-17 | 1.000000 | 2.40844e-17 | 1.000000 |
| rad1                          | 1.42603e-17 | 1.000000 | 1.42603e-17 | 1.000000 |
| rad71                         | 1.35745e-17 | 1.000000 | 1.35745e-17 | 1.000000 |
| rad10                         | 5.76704e-18 | 1.000000 | 5.76704e-18 | 1.000000 |
| rad3                          | 1.71387e-18 | 1.000000 | 1.71387e-18 | 1.000000 |
| rad19syn                      | 1.45990e-18 | 1.000000 | 1.45990e-18 | 1.000000 |
| rad36                         | 1.30269e-18 | 1.000000 | 1.30269e-18 | 1.000000 |
| rad4                          | 9.78717e-19 | 1.000000 | 9.78717e-19 | 1.000000 |
| rad26                         | 3.53480e-19 | 1.000000 | 3.53480e-19 | 1.000000 |
| rad28                         | 7.54644e-20 | 1.000000 | 7.54644e-20 | 1.000000 |
| rad7                          | 5.03308e-20 | 1.000000 | 5.03308e-20 | 1.000000 |
| rad15                         | 3.74845e-20 | 1.000000 | 3.74845e-20 | 1.000000 |
| rad31                         | 1.77645e-20 | 1.000000 | 1.77645e-20 | 1.000000 |
| rad11                         | 1.27508e-20 | 1.000000 | 1.27508e-20 | 1.000000 |
| rad22                         | 5.02107e-21 | 1.000000 | 5.02107e-21 | 1.000000 |
| rad72                         | 2.00231e-21 | 1.000000 | 2.00231e-21 | 1.000000 |
| rad13                         | 3.39842e-22 | 1.000000 | 3.39842e-22 | 1.000000 |
| rad12                         | 1.89164e-22 | 1.000000 | 1.89164e-22 | 1.000000 |
| rad27                         | 6.12201e-24 | 1.000000 | 6.12201e-24 | 1.000000 |
| rad14                         | 1.55697e-24 | 1.000000 | 1.55697e-24 | 1.000000 |
| rad33                         | 1.00358e-24 | 1.000000 | 1.00358e-24 | 1.000000 |
| rad47                         | 5.02583e-25 | 1.000000 | 5.02583e-25 | 1.000000 |
| rad25                         | 9.60450e-26 | 1.000000 | 9.60450e-26 | 1.000000 |
| rad24                         | 4.04600e-27 | 1.000000 | 4.04600e-27 | 1.000000 |
| rad21                         | 3.82945e-27 | 1.000000 | 3.82945e-27 | 1.000000 |
| rad20                         | 2.76949e-27 | 1.000000 | 2.76949e-27 | 1.000000 |

|       |             |          |             |          |
|-------|-------------|----------|-------------|----------|
| rad18 | 4.15666e-29 | 1.000000 | 4.15666e-29 | 1.000000 |
| rad5  | 4.62177e-30 | 1.000000 | 4.62177e-30 | 1.000000 |
| rad8  | 1.56287e-37 | 1.000000 | 1.56287e-37 | 1.000000 |

0.100000000E-03 Pa, 600.000000 K

| Rate constant             | True (fraction)        | Effective (fraction)   |
|---------------------------|------------------------|------------------------|
| Total                     | 4.35570e-13 (1.00 )    | 4.35570e-13 (1.00 )    |
| Formation of rad19        | 4.18892e-13 (0.962 )   | 4.18892e-13 (0.962 )   |
| H-abstraction to cyc2enyl | 1.54751e-14 (0.0355 )  | 1.54751e-14 (0.0355 )  |
| H-abstraction to cyc1enyl | 1.20343e-15 (0.00276 ) | 1.20343e-15 (0.00276 ) |

| species                       | PYtrue      | Cumul    | PYeffective | Cumul    |
|-------------------------------|-------------|----------|-------------|----------|
| Indene+H                      | 0.957276    | 0.957276 | 0.957276    | 0.957276 |
| Benzene+cycloprop-2-enylidene | 0.0355285   | 0.992805 | 0.0355285   | 0.992805 |
| PhCHCCH2+H                    | 0.00402172  | 0.996826 | 0.00402172  | 0.996826 |
| Benzene+cycloprop-1-enylidene | 0.00276289  | 0.999589 | 0.00276289  | 0.999589 |
| C2H2+PhCH2                    | 0.000111945 | 0.999701 | 0.000111945 | 0.999701 |
| Ph+MeAc                       | 8.57420e-05 | 0.999787 | 8.57420e-05 | 0.999787 |
| PhCCH+CH3                     | 6.75064e-05 | 0.999854 | 6.75064e-05 | 0.999854 |
| PhCCCH3+H                     | 5.90383e-05 | 0.999913 | 5.90383e-05 | 0.999913 |
| Ph+Allene                     | 3.56628e-05 | 0.999949 | 3.56628e-05 | 0.999949 |
| rad67                         | 2.54029e-05 | 0.999975 | 2.54029e-05 | 0.999975 |
| PhCH2CCH+H                    | 1.09199e-05 | 0.999985 | 1.09199e-05 | 0.999985 |
| rad35                         | 9.63305e-06 | 0.999995 | 9.63305e-06 | 0.999995 |
| PAH7+H                        | 2.26706e-06 | 0.999997 | 2.26706e-06 | 0.999997 |
| rad37                         | 8.64904e-07 | 0.999998 | 8.64904e-07 | 0.999998 |
| rad39                         | 5.20249e-07 | 0.999999 | 5.20249e-07 | 0.999999 |
| PhcycC3H3_A+H                 | 3.56529e-07 | 0.999999 | 3.56529e-07 | 0.999999 |
| rad30                         | 2.27441e-07 | 0.999999 | 2.27441e-07 | 0.999999 |
| PAH10+CH3                     | 8.50920e-08 | 0.999999 | 8.50920e-08 | 0.999999 |
| PhcycC3H3_B+H                 | 8.43895e-08 | 0.999999 | 8.43895e-08 | 0.999999 |
| PAH9+H                        | 7.13070e-08 | 1.000000 | 7.13070e-08 | 1.000000 |
| rad38                         | 5.21311e-08 | 1.000000 | 5.21311e-08 | 1.000000 |
| Phenyl+cycC3H4                | 3.58023e-08 | 1.000000 | 0.000000    | 1.000000 |
| PAH3+H                        | 1.45691e-08 | 1.000000 | 1.45691e-08 | 1.000000 |
| rad60syn                      | 5.03972e-09 | 1.000000 | 5.03972e-09 | 1.000000 |
| rad46                         | 4.37621e-09 | 1.000000 | 4.37621e-09 | 1.000000 |
| rad60anti                     | 2.82886e-09 | 1.000000 | 2.82886e-09 | 1.000000 |
| rad54                         | 2.63022e-09 | 1.000000 | 2.63022e-09 | 1.000000 |
| rad59                         | 2.03126e-09 | 1.000000 | 2.03126e-09 | 1.000000 |
| rad43                         | 9.14302e-10 | 1.000000 | 9.14302e-10 | 1.000000 |
| rad50                         | 4.49074e-10 | 1.000000 | 4.49074e-10 | 1.000000 |
| PAH1+H                        | 4.05905e-10 | 1.000000 | 4.05905e-10 | 1.000000 |
| rad70                         | 2.63826e-10 | 1.000000 | 2.63826e-10 | 1.000000 |
| rad62                         | 1.58022e-10 | 1.000000 | 1.58022e-10 | 1.000000 |
| rad55                         | 1.01573e-10 | 1.000000 | 1.01573e-10 | 1.000000 |
| rad34                         | 2.81348e-11 | 1.000000 | 2.81348e-11 | 1.000000 |
| rad51                         | 2.21631e-11 | 1.000000 | 2.21631e-11 | 1.000000 |
| rad58                         | 1.79744e-11 | 1.000000 | 1.79744e-11 | 1.000000 |
| rad52                         | 1.61050e-11 | 1.000000 | 1.61050e-11 | 1.000000 |
| rad41                         | 7.27827e-12 | 1.000000 | 7.27827e-12 | 1.000000 |
| rad61                         | 2.69080e-12 | 1.000000 | 2.69080e-12 | 1.000000 |
| rad53                         | 2.26526e-12 | 1.000000 | 2.26526e-12 | 1.000000 |
| rad42                         | 1.88131e-12 | 1.000000 | 1.88131e-12 | 1.000000 |
| rad64                         | 9.96176e-13 | 1.000000 | 9.96176e-13 | 1.000000 |
| rad65                         | 7.15324e-13 | 1.000000 | 7.15324e-13 | 1.000000 |
| rad56                         | 5.47638e-13 | 1.000000 | 5.47639e-13 | 1.000000 |
| rad68syn                      | 8.54716e-14 | 1.000000 | 8.54716e-14 | 1.000000 |
| rad68anti                     | 5.81389e-14 | 1.000000 | 5.81390e-14 | 1.000000 |
| rad19anti                     | 4.93441e-14 | 1.000000 | 4.93441e-14 | 1.000000 |
| PAH8+H                        | 3.69245e-14 | 1.000000 | 3.69245e-14 | 1.000000 |
| rad40syn                      | 1.73285e-14 | 1.000000 | 1.73285e-14 | 1.000000 |
| rad40anti                     | 1.26417e-14 | 1.000000 | 1.26417e-14 | 1.000000 |
| rad6                          | 8.69761e-15 | 1.000000 | 8.69761e-15 | 1.000000 |
| rad23                         | 7.78605e-15 | 1.000000 | 7.78605e-15 | 1.000000 |
| rad2                          | 4.35150e-15 | 1.000000 | 4.35150e-15 | 1.000000 |
| rad73                         | 3.37917e-15 | 1.000000 | 3.37917e-15 | 1.000000 |
| rad9                          | 2.56107e-15 | 1.000000 | 2.56107e-15 | 1.000000 |
| rad45                         | 1.34323e-15 | 1.000000 | 1.34323e-15 | 1.000000 |
| rad71                         | 1.04551e-15 | 1.000000 | 1.04551e-15 | 1.000000 |
| rad1                          | 7.09193e-16 | 1.000000 | 7.09193e-16 | 1.000000 |
| rad19syn                      | 1.52297e-16 | 1.000000 | 1.52297e-16 | 1.000000 |
| rad36                         | 1.43680e-16 | 1.000000 | 1.43680e-16 | 1.000000 |
| rad10                         | 1.31302e-16 | 1.000000 | 1.31302e-16 | 1.000000 |
| rad3                          | 6.52662e-17 | 1.000000 | 6.52662e-17 | 1.000000 |
| rad4                          | 4.45814e-17 | 1.000000 | 4.45814e-17 | 1.000000 |
| rad26                         | 5.23165e-18 | 1.000000 | 5.23165e-18 | 1.000000 |

|       |             |          |             |          |
|-------|-------------|----------|-------------|----------|
| rad15 | 1.69590e-18 | 1.000000 | 1.69590e-18 | 1.000000 |
| rad12 | 1.38552e-18 | 1.000000 | 1.38552e-18 | 1.000000 |
| rad28 | 1.03726e-18 | 1.000000 | 1.03726e-18 | 1.000000 |
| rad7  | 9.67440e-19 | 1.000000 | 9.67440e-19 | 1.000000 |
| rad72 | 6.74336e-19 | 1.000000 | 6.74336e-19 | 1.000000 |
| rad31 | 3.24820e-19 | 1.000000 | 3.24820e-19 | 1.000000 |
| rad11 | 2.60667e-19 | 1.000000 | 2.60667e-19 | 1.000000 |
| rad22 | 2.15243e-19 | 1.000000 | 2.15243e-19 | 1.000000 |
| rad13 | 7.82246e-21 | 1.000000 | 7.82246e-21 | 1.000000 |
| rad27 | 1.12593e-22 | 1.000000 | 1.12593e-22 | 1.000000 |
| rad33 | 2.86474e-23 | 1.000000 | 2.86474e-23 | 1.000000 |
| rad14 | 2.28412e-23 | 1.000000 | 2.28412e-23 | 1.000000 |
| rad47 | 1.30363e-23 | 1.000000 | 1.30363e-23 | 1.000000 |
| rad25 | 1.45982e-24 | 1.000000 | 1.45982e-24 | 1.000000 |
| rad24 | 1.16262e-24 | 1.000000 | 1.16262e-24 | 1.000000 |
| rad21 | 7.24245e-25 | 1.000000 | 7.24245e-25 | 1.000000 |
| rad20 | 3.35417e-25 | 1.000000 | 3.35417e-25 | 1.000000 |
| rad18 | 3.23928e-27 | 1.000000 | 3.23928e-27 | 1.000000 |
| rad5  | 6.47731e-30 | 1.000000 | 6.47731e-30 | 1.000000 |
| rad8  | 2.39366e-32 | 1.000000 | 2.39366e-32 | 1.000000 |

0.100000000E-03 Pa, 700.000000 K

| Rate constant             | True (fraction)        | Effective (fraction)   |
|---------------------------|------------------------|------------------------|
| Total                     | 6.91694e-13 (1.00 )    | 6.91694e-13 (1.00 )    |
| Formation of rad19        | 6.47922e-13 (0.937 )   | 6.47922e-13 (0.937 )   |
| H-abstraction to cyc2enyl | 3.91858e-14 (0.0567 )  | 3.91858e-14 (0.0567 )  |
| H-abstraction to cyclenyl | 4.58543e-15 (0.00663 ) | 4.58542e-15 (0.00663 ) |

| species                       | PYtrue      | Cumul    | PYeffective | Cumul    |
|-------------------------------|-------------|----------|-------------|----------|
| Indene+H                      | 0.928261    | 0.928261 | 0.928261    | 0.928261 |
| Benzene+cycloprop-2-enylidene | 0.0566520   | 0.984913 | 0.0566520   | 0.984913 |
| PhCHCCH2+H                    | 0.00759850  | 0.992512 | 0.00759851  | 0.992512 |
| Benzene+cycloprop-1-enylidene | 0.00662927  | 0.999141 | 0.00662927  | 0.999141 |
| C2H2+PhCH2                    | 0.000223367 | 0.999364 | 0.000223367 | 0.999364 |
| Ph+MeAc                       | 0.000184762 | 0.999549 | 0.000184762 | 0.999549 |
| PhCCH+CH3                     | 0.000114475 | 0.999663 | 0.000114475 | 0.999663 |
| PhCCCH3+H                     | 0.000114174 | 0.999778 | 0.000114174 | 0.999778 |
| Ph+Allene                     | 9.86533e-05 | 0.999876 | 9.86533e-05 | 0.999876 |
| rad67                         | 5.61617e-05 | 0.999932 | 5.61618e-05 | 0.999932 |
| PhCH2CCH+H                    | 3.37385e-05 | 0.999966 | 3.37385e-05 | 0.999966 |
| rad35                         | 2.09201e-05 | 0.999987 | 2.09202e-05 | 0.999987 |
| PAH7+H                        | 5.25052e-06 | 0.999992 | 5.25052e-06 | 0.999992 |
| rad37                         | 2.31770e-06 | 0.999995 | 2.31770e-06 | 0.999995 |
| PhcycC3H3_A+H                 | 1.84668e-06 | 0.999997 | 1.84668e-06 | 0.999997 |
| rad39                         | 1.15814e-06 | 0.999998 | 1.15814e-06 | 0.999998 |
| PhcycC3H3_B+H                 | 5.97889e-07 | 0.999998 | 5.97889e-07 | 0.999998 |
| rad30                         | 5.35177e-07 | 0.999999 | 5.35177e-07 | 0.999999 |
| PAH10+CH3                     | 3.93624e-07 | 0.999999 | 3.93624e-07 | 0.999999 |
| Phenyl+cycC3H4                | 2.47273e-07 | 0.999999 | 0.000000    | 0.999999 |
| PAH9+H                        | 2.20558e-07 | 1.000000 | 2.20558e-07 | 0.999999 |
| rad38                         | 1.79348e-07 | 1.000000 | 1.79348e-07 | 1.000000 |
| PAH3+H                        | 5.98815e-08 | 1.000000 | 5.98815e-08 | 1.000000 |
| rad46                         | 1.59383e-08 | 1.000000 | 1.59383e-08 | 1.000000 |
| rad60syn                      | 1.57198e-08 | 1.000000 | 1.57198e-08 | 1.000000 |
| rad54                         | 1.11959e-08 | 1.000000 | 1.11959e-08 | 1.000000 |
| rad60anti                     | 9.00502e-09 | 1.000000 | 9.00502e-09 | 1.000000 |
| rad59                         | 7.88061e-09 | 1.000000 | 7.88061e-09 | 1.000000 |
| rad43                         | 3.45953e-09 | 1.000000 | 3.45953e-09 | 1.000000 |
| PAH1+H                        | 2.45995e-09 | 1.000000 | 2.45995e-09 | 1.000000 |
| rad50                         | 2.44564e-09 | 1.000000 | 2.44564e-09 | 1.000000 |
| rad70                         | 1.34938e-09 | 1.000000 | 1.34939e-09 | 1.000000 |
| rad62                         | 5.31170e-10 | 1.000000 | 5.31170e-10 | 1.000000 |
| rad55                         | 4.95201e-10 | 1.000000 | 4.95201e-10 | 1.000000 |
| rad51                         | 1.72654e-10 | 1.000000 | 1.72654e-10 | 1.000000 |
| rad34                         | 1.70511e-10 | 1.000000 | 1.70511e-10 | 1.000000 |
| rad58                         | 1.15481e-10 | 1.000000 | 1.15481e-10 | 1.000000 |
| rad52                         | 1.05443e-10 | 1.000000 | 1.05443e-10 | 1.000000 |
| rad41                         | 4.33848e-11 | 1.000000 | 4.33848e-11 | 1.000000 |
| rad61                         | 2.93831e-11 | 1.000000 | 2.93831e-11 | 1.000000 |
| rad53                         | 1.83949e-11 | 1.000000 | 1.83949e-11 | 1.000000 |
| rad42                         | 9.22818e-12 | 1.000000 | 9.22818e-12 | 1.000000 |
| rad64                         | 7.68987e-12 | 1.000000 | 7.68987e-12 | 1.000000 |
| rad56                         | 6.14022e-12 | 1.000000 | 6.14022e-12 | 1.000000 |
| rad65                         | 5.56202e-12 | 1.000000 | 5.56202e-12 | 1.000000 |
| rad68syn                      | 1.01762e-12 | 1.000000 | 1.01762e-12 | 1.000000 |
| PAH8+H                        | 7.27473e-13 | 1.000000 | 7.27473e-13 | 1.000000 |
| rad9                          | 6.96092e-13 | 1.000000 | 6.96092e-13 | 1.000000 |

|           |             |          |             |          |
|-----------|-------------|----------|-------------|----------|
| rad68anti | 6.85899e-13 | 1.000000 | 6.85899e-13 | 1.000000 |
| rad40syn  | 2.67924e-13 | 1.000000 | 2.67924e-13 | 1.000000 |
| rad40anti | 1.96405e-13 | 1.000000 | 1.96405e-13 | 1.000000 |
| rad73     | 8.04136e-14 | 1.000000 | 8.04136e-14 | 1.000000 |
| rad19anti | 6.95729e-14 | 1.000000 | 6.95729e-14 | 1.000000 |
| rad23     | 3.70364e-14 | 1.000000 | 3.70364e-14 | 1.000000 |
| rad71     | 3.43166e-14 | 1.000000 | 3.43167e-14 | 1.000000 |
| rad6      | 2.71313e-14 | 1.000000 | 2.71313e-14 | 1.000000 |
| rad2      | 1.85142e-14 | 1.000000 | 1.85142e-14 | 1.000000 |
| rad45     | 6.30551e-15 | 1.000000 | 6.30551e-15 | 1.000000 |
| rad1      | 4.52539e-15 | 1.000000 | 4.52539e-15 | 1.000000 |
| rad12     | 1.17951e-15 | 1.000000 | 1.17951e-15 | 1.000000 |
| rad19syn  | 8.87889e-16 | 1.000000 | 8.87889e-16 | 1.000000 |
| rad36     | 8.84760e-16 | 1.000000 | 8.84760e-16 | 1.000000 |
| rad10     | 4.64155e-16 | 1.000000 | 4.64155e-16 | 1.000000 |
| rad15     | 3.19336e-16 | 1.000000 | 3.19336e-16 | 1.000000 |
| rad3      | 2.60381e-16 | 1.000000 | 2.60381e-16 | 1.000000 |
| rad4      | 2.09090e-16 | 1.000000 | 2.09090e-16 | 1.000000 |
| rad72     | 5.68749e-17 | 1.000000 | 5.68749e-17 | 1.000000 |
| rad26     | 1.65112e-17 | 1.000000 | 1.65112e-17 | 1.000000 |
| rad7      | 3.49080e-18 | 1.000000 | 3.49080e-18 | 1.000000 |
| rad28     | 3.28268e-18 | 1.000000 | 3.28268e-18 | 1.000000 |
| rad22     | 1.07848e-18 | 1.000000 | 1.07848e-18 | 1.000000 |
| rad11     | 1.02310e-18 | 1.000000 | 1.02310e-18 | 1.000000 |
| rad31     | 9.71078e-19 | 1.000000 | 9.71078e-19 | 1.000000 |
| rad13     | 3.85327e-20 | 1.000000 | 3.85327e-20 | 1.000000 |
| rad24     | 2.00475e-21 | 1.000000 | 2.00475e-21 | 1.000000 |
| rad27     | 3.97783e-22 | 1.000000 | 3.97784e-22 | 1.000000 |
| rad21     | 3.13241e-22 | 1.000000 | 3.13241e-22 | 1.000000 |
| rad33     | 2.61705e-22 | 1.000000 | 2.61705e-22 | 1.000000 |
| rad47     | 1.29142e-22 | 1.000000 | 1.29142e-22 | 1.000000 |
| rad14     | 7.74378e-23 | 1.000000 | 7.74378e-23 | 1.000000 |
| rad20     | 5.36883e-23 | 1.000000 | 5.36883e-23 | 1.000000 |
| rad25     | 9.69551e-24 | 1.000000 | 9.69551e-24 | 1.000000 |
| rad18     | 6.24306e-26 | 1.000000 | 6.24306e-26 | 1.000000 |
| rad8      | 5.34064e-27 | 1.000000 | 5.34064e-27 | 1.000000 |
| rad5      | 1.40806e-29 | 1.000000 | 1.40806e-29 | 1.000000 |

0.100000000E-03 Pa, 800.000000 K

| Rate constant             | True (fraction)       | Effective (fraction)  |
|---------------------------|-----------------------|-----------------------|
| Total                     | 1.03759e-12 (1.00 )   | 1.03758e-12 (1.00 )   |
| Formation of rad19        | 9.41065e-13 (0.907 )  | 9.41063e-13 (0.907 )  |
| H-abstraction to cyc2enyl | 8.32953e-14 (0.0803 ) | 8.32953e-14 (0.0803 ) |
| H-abstraction to cyclenyl | 1.32261e-14 (0.0127 ) | 1.32261e-14 (0.0127 ) |

| species                       | PYtrue      | Cumul    | PYeffective | Cumul    |
|-------------------------------|-------------|----------|-------------|----------|
| Indene+H                      | 0.891851    | 0.891851 | 0.891852    | 0.891852 |
| Benzene+cycloprop-2-enylidene | 0.0802780   | 0.972129 | 0.0802781   | 0.972130 |
| PhCHCCH2+H                    | 0.0134622   | 0.985591 | 0.0134623   | 0.985592 |
| Benzene+cycloprop-1-enylidene | 0.0127470   | 0.998338 | 0.0127470   | 0.998339 |
| C2H2+PhCH2                    | 0.000407098 | 0.998746 | 0.000407098 | 0.998747 |
| Ph+MeAc                       | 0.000361138 | 0.999107 | 0.000361138 | 0.999108 |
| Ph+Allene                     | 0.000232338 | 0.999339 | 0.000232338 | 0.999340 |
| PhCCCH3+H                     | 0.000203971 | 0.999543 | 0.000203971 | 0.999544 |
| PhCCH+CH3                     | 0.000180552 | 0.999724 | 0.000180553 | 0.999725 |
| rad67                         | 0.000113174 | 0.999837 | 0.000113174 | 0.999838 |
| PhCH2CCH+H                    | 8.77930e-05 | 0.999924 | 8.77932e-05 | 0.999925 |
| rad35                         | 4.16128e-05 | 0.999966 | 4.16129e-05 | 0.999967 |
| PAH7+H                        | 1.05800e-05 | 0.999977 | 1.05800e-05 | 0.999978 |
| PhcycC3H3_A+H                 | 7.41209e-06 | 0.999984 | 7.41210e-06 | 0.999985 |
| rad37                         | 5.46662e-06 | 0.999990 | 5.46663e-06 | 0.999991 |
| PhcycC3H3_B+H                 | 3.06124e-06 | 0.999993 | 3.06124e-06 | 0.999994 |
| rad39                         | 2.23427e-06 | 0.999995 | 2.23428e-06 | 0.999996 |
| PAH10+CH3                     | 1.45373e-06 | 0.999996 | 1.45373e-06 | 0.999997 |
| Phenyl+cycC3H4                | 1.26413e-06 | 0.999998 | 0.000000    | 0.999997 |
| rad30                         | 1.14933e-06 | 0.999999 | 1.14933e-06 | 0.999998 |
| PAH9+H                        | 6.06281e-07 | 0.999999 | 6.06282e-07 | 0.999999 |
| rad38                         | 5.31254e-07 | 1.000000 | 5.31255e-07 | 1.000000 |
| PAH3+H                        | 2.06534e-07 | 1.000000 | 2.06535e-07 | 1.000000 |
| rad46                         | 5.03837e-08 | 1.000000 | 5.03838e-08 | 1.000000 |
| rad60syn                      | 4.30113e-08 | 1.000000 | 4.30113e-08 | 1.000000 |
| rad54                         | 3.72615e-08 | 1.000000 | 3.72615e-08 | 1.000000 |
| rad59                         | 2.58004e-08 | 1.000000 | 2.58004e-08 | 1.000000 |
| rad60anti                     | 2.50612e-08 | 1.000000 | 2.50612e-08 | 1.000000 |
| PAH1+H                        | 1.11102e-08 | 1.000000 | 1.11102e-08 | 1.000000 |
| rad50                         | 1.08530e-08 | 1.000000 | 1.08530e-08 | 1.000000 |
| rad43                         | 1.08255e-08 | 1.000000 | 1.08255e-08 | 1.000000 |



|           |             |         |             |         |
|-----------|-------------|---------|-------------|---------|
| rad70     | 5.27763e-09 | 1.00000 | 5.27763e-09 | 1.00000 |
| rad55     | 1.83174e-09 | 1.00000 | 1.83175e-09 | 1.00000 |
| rad62     | 1.46956e-09 | 1.00000 | 1.46956e-09 | 1.00000 |
| rad51     | 1.02140e-09 | 1.00000 | 1.02141e-09 | 1.00000 |
| rad34     | 7.64054e-10 | 1.00000 | 7.64055e-10 | 1.00000 |
| rad58     | 5.66064e-10 | 1.00000 | 5.66065e-10 | 1.00000 |
| rad52     | 5.41769e-10 | 1.00000 | 5.41770e-10 | 1.00000 |
| rad61     | 2.09072e-10 | 1.00000 | 2.09072e-10 | 1.00000 |
| rad41     | 1.94595e-10 | 1.00000 | 1.94595e-10 | 1.00000 |
| rad53     | 1.01501e-10 | 1.00000 | 1.01501e-10 | 1.00000 |
| rad56     | 4.31933e-11 | 1.00000 | 4.31934e-11 | 1.00000 |
| rad9      | 4.04987e-11 | 1.00000 | 4.04987e-11 | 1.00000 |
| rad64     | 4.01363e-11 | 1.00000 | 4.01363e-11 | 1.00000 |
| rad42     | 3.44813e-11 | 1.00000 | 3.44814e-11 | 1.00000 |
| rad65     | 3.26030e-11 | 1.00000 | 3.26030e-11 | 1.00000 |
| PAH8+H    | 8.11499e-12 | 1.00000 | 8.11500e-12 | 1.00000 |
| rad68syn  | 7.66846e-12 | 1.00000 | 7.66847e-12 | 1.00000 |
| rad68anti | 5.13229e-12 | 1.00000 | 5.13230e-12 | 1.00000 |
| rad40syn  | 2.48637e-12 | 1.00000 | 2.48637e-12 | 1.00000 |
| rad40anti | 1.83893e-12 | 1.00000 | 1.83894e-12 | 1.00000 |
| rad73     | 1.11387e-12 | 1.00000 | 1.11387e-12 | 1.00000 |
| rad71     | 6.08127e-13 | 1.00000 | 6.08128e-13 | 1.00000 |
| rad12     | 6.62399e-14 | 1.00000 | 6.62400e-14 | 1.00000 |
| rad23     | 6.37820e-14 | 1.00000 | 6.37821e-14 | 1.00000 |
| rad19anti | 6.02835e-14 | 1.00000 | 6.02835e-14 | 1.00000 |
| rad6      | 3.30974e-14 | 1.00000 | 3.30975e-14 | 1.00000 |
| rad2      | 2.65091e-14 | 1.00000 | 2.65091e-14 | 1.00000 |
| rad45     | 1.37003e-14 | 1.00000 | 1.37003e-14 | 1.00000 |
| rad15     | 1.14940e-14 | 1.00000 | 1.14940e-14 | 1.00000 |
| rad1      | 7.77644e-15 | 1.00000 | 7.77645e-15 | 1.00000 |
| rad72     | 2.02320e-15 | 1.00000 | 2.02321e-15 | 1.00000 |
| rad36     | 1.68440e-15 | 1.00000 | 1.68440e-15 | 1.00000 |
| rad19syn  | 1.44428e-15 | 1.00000 | 1.44428e-15 | 1.00000 |
| rad10     | 6.82960e-16 | 1.00000 | 6.82962e-16 | 1.00000 |
| rad3      | 3.33077e-16 | 1.00000 | 3.33077e-16 | 1.00000 |
| rad4      | 2.74037e-16 | 1.00000 | 2.74037e-16 | 1.00000 |
| rad26     | 2.19060e-17 | 1.00000 | 2.19060e-17 | 1.00000 |
| rad7      | 5.24763e-18 | 1.00000 | 5.24764e-18 | 1.00000 |
| rad28     | 4.40088e-18 | 1.00000 | 4.40089e-18 | 1.00000 |
| rad22     | 2.04419e-18 | 1.00000 | 2.04419e-18 | 1.00000 |
| rad11     | 1.71531e-18 | 1.00000 | 1.71531e-18 | 1.00000 |
| rad31     | 1.51028e-18 | 1.00000 | 1.51028e-18 | 1.00000 |
| rad24     | 4.04466e-19 | 1.00000 | 4.04466e-19 | 1.00000 |
| rad21     | 1.34523e-19 | 1.00000 | 1.34523e-19 | 1.00000 |
| rad13     | 9.24643e-20 | 1.00000 | 9.24643e-20 | 1.00000 |
| rad33     | 2.40790e-20 | 1.00000 | 2.40791e-20 | 1.00000 |
| rad20     | 2.16810e-20 | 1.00000 | 2.16810e-20 | 1.00000 |
| rad27     | 9.48460e-22 | 1.00000 | 9.48469e-22 | 1.00000 |
| rad47     | 8.53942e-22 | 1.00000 | 8.53943e-22 | 1.00000 |
| rad25     | 3.75089e-22 | 1.00000 | 3.75089e-22 | 1.00000 |
| rad8      | 2.39851e-22 | 1.00000 | 2.39851e-22 | 1.00000 |
| rad14     | 1.51832e-22 | 1.00000 | 1.51833e-22 | 1.00000 |
| rad18     | 6.51839e-25 | 1.00000 | 6.51840e-25 | 1.00000 |
| rad5      | 5.53774e-29 | 1.00000 | 5.53775e-29 | 1.00000 |

0.100000000E-03 Pa, 900.000000 K

| Rate constant             | True (fraction)       | Effective (fraction)  |
|---------------------------|-----------------------|-----------------------|
| Total                     | 1.49199e-12 (1.00 )   | 1.49199e-12 (1.00 )   |
| Formation of rad19        | 1.30395e-12 (0.874 )  | 1.30394e-12 (0.874 )  |
| H-abstraction to cyc2enyl | 1.56554e-13 (0.105 )  | 1.56554e-13 (0.105 )  |
| H-abstraction to cyclenyl | 3.14892e-14 (0.0211 ) | 3.14890e-14 (0.0211 ) |

| species                       | PYtrue      | Cumul    | PYeffective | Cumul    |
|-------------------------------|-------------|----------|-------------|----------|
| Indene+H                      | 0.848699    | 0.848699 | 0.848703    | 0.848703 |
| Benzene+cycloprop-2-enylidene | 0.104929    | 0.953628 | 0.104930    | 0.953634 |
| PhCHCCH2+H                    | 0.0222941   | 0.975922 | 0.0222941   | 0.975928 |
| Benzene+cycloprop-1-enylidene | 0.0211054   | 0.997028 | 0.0211054   | 0.997033 |
| C2H2+PhCH2                    | 0.000683868 | 0.997712 | 0.000683871 | 0.997717 |
| Ph+MeAc                       | 0.000643403 | 0.998355 | 0.000643407 | 0.998360 |
| Ph+Allene                     | 0.000474185 | 0.998829 | 0.000474187 | 0.998835 |
| PhCCCH3+H                     | 0.000337156 | 0.999166 | 0.000337157 | 0.999172 |
| PhCCH+CH3                     | 0.000266833 | 0.999433 | 0.000266834 | 0.999439 |
| rad67                         | 0.000208252 | 0.999641 | 0.000208253 | 0.999647 |
| PhCH2CCH+H                    | 0.000196562 | 0.999838 | 0.000196563 | 0.999843 |
| rad35                         | 7.58729e-05 | 0.999914 | 7.58733e-05 | 0.999919 |
| PhcycC3H3_A+H                 | 2.42103e-05 | 0.999938 | 2.42105e-05 | 0.999943 |
| PAH7+H                        | 1.88375e-05 | 0.999957 | 1.88376e-05 | 0.999962 |

|                |             |          |             |          |
|----------------|-------------|----------|-------------|----------|
| PhcycC3H3_B+H  | 1.21561e-05 | 0.999969 | 1.21561e-05 | 0.999974 |
| rad37          | 1.14050e-05 | 0.999980 | 1.14050e-05 | 0.999986 |
| Phenyl+cycC3H4 | 5.07995e-06 | 0.999986 | 0.00000     | 0.999986 |
| PAH10+CH3      | 4.40461e-06 | 0.999990 | 4.40463e-06 | 0.999990 |
| rad39          | 3.79886e-06 | 0.999994 | 3.79888e-06 | 0.999994 |
| rad30          | 2.25163e-06 | 0.999996 | 2.25165e-06 | 0.999996 |
| PAH9+H         | 1.48864e-06 | 0.999997 | 1.48865e-06 | 0.999998 |
| rad38          | 1.36505e-06 | 0.999999 | 1.36505e-06 | 0.999999 |
| PAH3+H         | 6.06186e-07 | 0.999999 | 6.06189e-07 | 1.000000 |
| rad46          | 1.39482e-07 | 1.000000 | 1.39483e-07 | 1.000000 |
| rad60syn       | 1.03783e-07 | 1.000000 | 1.03784e-07 | 1.000000 |
| rad54          | 1.00667e-07 | 1.000000 | 1.00667e-07 | 1.000000 |
| rad59          | 7.22570e-08 | 1.000000 | 7.22574e-08 | 1.000000 |
| rad60anti      | 6.13422e-08 | 1.000000 | 6.13425e-08 | 1.000000 |
| rad50          | 4.00789e-08 | 1.000000 | 4.00791e-08 | 1.000000 |
| PAH1+H         | 3.94732e-08 | 1.000000 | 3.94734e-08 | 1.000000 |
| rad43          | 2.87031e-08 | 1.000000 | 2.87033e-08 | 1.000000 |
| rad70          | 1.65408e-08 | 1.000000 | 1.65408e-08 | 1.000000 |
| rad55          | 5.38699e-09 | 1.000000 | 5.38702e-09 | 1.000000 |
| rad51          | 4.77137e-09 | 1.000000 | 4.77139e-09 | 1.000000 |
| rad62          | 3.44637e-09 | 1.000000 | 3.44638e-09 | 1.000000 |
| rad34          | 2.67892e-09 | 1.000000 | 2.67894e-09 | 1.000000 |
| rad52          | 2.25238e-09 | 1.000000 | 2.25239e-09 | 1.000000 |
| rad58          | 2.20457e-09 | 1.000000 | 2.20458e-09 | 1.000000 |
| rad61          | 1.06256e-09 | 1.000000 | 1.06257e-09 | 1.000000 |
| rad41          | 6.91191e-10 | 1.000000 | 6.91195e-10 | 1.000000 |
| rad53          | 4.12666e-10 | 1.000000 | 4.12668e-10 | 1.000000 |
| rad9           | 2.88314e-10 | 1.000000 | 2.88316e-10 | 1.000000 |
| rad56          | 2.12371e-10 | 1.000000 | 2.12372e-10 | 1.000000 |
| rad64          | 1.54860e-10 | 1.000000 | 1.54860e-10 | 1.000000 |
| rad65          | 1.50320e-10 | 1.000000 | 1.50321e-10 | 1.000000 |
| rad42          | 1.03377e-10 | 1.000000 | 1.03377e-10 | 1.000000 |
| PAH8+H         | 5.91178e-11 | 1.000000 | 5.91181e-11 | 1.000000 |
| rad68syn       | 4.07133e-11 | 1.000000 | 4.07136e-11 | 1.000000 |
| rad68anti      | 2.70947e-11 | 1.000000 | 2.70947e-11 | 1.000000 |
| rad40syn       | 1.56733e-11 | 1.000000 | 1.56734e-11 | 1.000000 |
| rad40anti      | 1.17159e-11 | 1.000000 | 1.17160e-11 | 1.000000 |
| rad73          | 1.01671e-11 | 1.000000 | 1.01671e-11 | 1.000000 |
| rad71          | 6.75212e-12 | 1.000000 | 6.75216e-12 | 1.000000 |
| rad12          | 4.04551e-13 | 1.000000 | 4.04554e-13 | 1.000000 |
| rad23          | 7.12192e-14 | 1.000000 | 7.12195e-14 | 1.000000 |
| rad15          | 6.35310e-14 | 1.000000 | 6.35314e-14 | 1.000000 |
| rad19anti      | 4.57501e-14 | 1.000000 | 4.57503e-14 | 1.000000 |
| rad72          | 3.83277e-14 | 1.000000 | 3.83278e-14 | 1.000000 |
| rad2           | 2.50664e-14 | 1.000000 | 2.50665e-14 | 1.000000 |
| rad6           | 2.40147e-14 | 1.000000 | 2.40148e-14 | 1.000000 |
| rad45          | 1.87889e-14 | 1.000000 | 1.87890e-14 | 1.000000 |
| rad1           | 7.47650e-15 | 1.000000 | 7.47654e-15 | 1.000000 |
| rad36          | 2.10049e-15 | 1.000000 | 2.10050e-15 | 1.000000 |
| rad19syn       | 1.51735e-15 | 1.000000 | 1.51736e-15 | 1.000000 |
| rad10          | 6.55178e-16 | 1.000000 | 6.55182e-16 | 1.000000 |
| rad3           | 2.76696e-16 | 1.000000 | 2.76697e-16 | 1.000000 |
| rad4           | 2.29087e-16 | 1.000000 | 2.29089e-16 | 1.000000 |
| rad26          | 1.73096e-17 | 1.000000 | 1.73097e-17 | 1.000000 |
| rad21          | 1.24314e-17 | 1.000000 | 1.24314e-17 | 1.000000 |
| rad24          | 8.13233e-18 | 1.000000 | 8.13237e-18 | 1.000000 |
| rad7           | 5.10708e-18 | 1.000000 | 5.10712e-18 | 1.000000 |
| rad28          | 3.54010e-18 | 1.000000 | 3.54012e-18 | 1.000000 |
| rad22          | 2.50544e-18 | 1.000000 | 2.50545e-18 | 1.000000 |
| rad20          | 2.39369e-18 | 1.000000 | 2.39370e-18 | 1.000000 |
| rad31          | 1.88477e-18 | 1.000000 | 1.88478e-18 | 1.000000 |
| rad11          | 1.86752e-18 | 1.000000 | 1.86753e-18 | 1.000000 |
| rad33          | 1.64434e-18 | 1.000000 | 1.64435e-18 | 1.000000 |
| rad8           | 5.47269e-19 | 1.000000 | 5.47272e-19 | 1.000000 |
| rad13          | 4.80024e-19 | 1.000000 | 4.80027e-19 | 1.000000 |
| rad25          | 2.46213e-20 | 1.000000 | 2.46214e-20 | 1.000000 |
| rad27          | 2.25833e-20 | 1.000000 | 2.25834e-20 | 1.000000 |
| rad47          | 4.17546e-21 | 1.000000 | 4.17547e-21 | 1.000000 |
| rad14          | 1.75692e-21 | 1.000000 | 1.75693e-21 | 1.000000 |
| rad18          | 2.09654e-23 | 1.000000 | 2.09655e-23 | 1.000000 |
| rad5           | 3.90410e-28 | 1.000000 | 3.90412e-28 | 1.000000 |

0.100000000E-03 Pa, 1000.00000 K

=====

| Rate constant             | True (fraction)       | Effective (fraction)  |
|---------------------------|-----------------------|-----------------------|
| Total                     | 2.07591e-12 (1.00 )   | 2.07587e-12 (1.00 )   |
| Formation of rad19        | 1.74189e-12 (0.839 )  | 1.74186e-12 (0.839 )  |
| H-abstraction to cyc2enyl | 2.68753e-13 (0.129 )  | 2.68753e-13 (0.129 )  |
| H-abstraction to cyclenyl | 6.52627e-14 (0.0314 ) | 6.52614e-14 (0.0314 ) |

| species                       | PYtrue      | Cumul    | PYeffective | Cumul    |
|-------------------------------|-------------|----------|-------------|----------|
| Indene+H                      | 0.799582    | 0.799582 | 0.799596    | 0.799596 |
| Benzene+cycloprop-2-enylidene | 0.129463    | 0.929045 | 0.129465    | 0.929061 |
| PhCHCCH2+H                    | 0.0345727   | 0.963618 | 0.0345733   | 0.963635 |
| Benzene+cycloprop-1-enylidene | 0.0314382   | 0.995056 | 0.0314381   | 0.995073 |
| C2H2+PhCH2                    | 0.00107013  | 0.996126 | 0.00107014  | 0.996143 |
| Ph+MeAc                       | 0.00105356  | 0.997180 | 0.00105357  | 0.997197 |
| Ph+Allene                     | 0.000856132 | 0.998036 | 0.000856147 | 0.998053 |
| PhCCCH3+H                     | 0.000518388 | 0.998554 | 0.000518396 | 0.998571 |
| PhCH2CCH+H                    | 0.000387330 | 0.998942 | 0.000387336 | 0.998958 |
| PhCCH+CH3                     | 0.000373412 | 0.999315 | 0.000373419 | 0.999332 |
| rad67                         | 0.000352154 | 0.999667 | 0.000352160 | 0.999684 |
| rad35                         | 0.000127506 | 0.999795 | 0.000127508 | 0.999812 |
| PhcycC3H3_A+H                 | 6.68787e-05 | 0.999862 | 6.68799e-05 | 0.999878 |
| PhcycC3H3_B+H                 | 3.94287e-05 | 0.999901 | 3.94293e-05 | 0.999918 |
| PAH7+H                        | 3.02070e-05 | 0.999931 | 3.02075e-05 | 0.999948 |
| rad37                         | 2.12565e-05 | 0.999953 | 2.12568e-05 | 0.999969 |
| Phenyl+cycC3H4                | 1.68078e-05 | 0.999969 | 0.00000     | 0.999969 |
| PAH10+CH3                     | 1.12446e-05 | 0.999981 | 1.12447e-05 | 0.999981 |
| rad39                         | 5.81024e-06 | 0.999986 | 5.81034e-06 | 0.999986 |
| rad30                         | 4.04406e-06 | 0.999990 | 4.04413e-06 | 0.999990 |
| PAH9+H                        | 3.29361e-06 | 0.999994 | 3.29367e-06 | 0.999994 |
| rad38                         | 3.08261e-06 | 0.999997 | 3.08266e-06 | 0.999997 |
| PAH3+H                        | 1.54070e-06 | 0.999998 | 1.54073e-06 | 0.999998 |
| rad46                         | 3.42239e-07 | 0.999999 | 3.42245e-07 | 0.999999 |
| rad54                         | 2.28520e-07 | 0.999999 | 2.28524e-07 | 0.999999 |
| rad60syn                      | 2.23169e-07 | 0.999999 | 2.23173e-07 | 0.999999 |
| rad59                         | 1.76070e-07 | 0.999999 | 1.76073e-07 | 0.999999 |
| rad60anti                     | 1.33518e-07 | 1.000000 | 1.33520e-07 | 0.999999 |
| rad50                         | 1.25826e-07 | 1.000000 | 1.25828e-07 | 1.000000 |
| PAH1+H                        | 1.15144e-07 | 1.000000 | 1.15145e-07 | 1.000000 |
| rad43                         | 6.59876e-08 | 1.000000 | 6.59887e-08 | 1.000000 |
| rad70                         | 4.32135e-08 | 1.000000 | 4.32143e-08 | 1.000000 |
| rad51                         | 1.82049e-08 | 1.000000 | 1.82052e-08 | 1.000000 |
| rad55                         | 1.31137e-08 | 1.000000 | 1.31139e-08 | 1.000000 |
| rad52                         | 7.79285e-09 | 1.000000 | 7.79298e-09 | 1.000000 |
| rad34                         | 7.69223e-09 | 1.000000 | 7.69236e-09 | 1.000000 |
| rad58                         | 7.06659e-09 | 1.000000 | 7.06671e-09 | 1.000000 |
| rad62                         | 7.03940e-09 | 1.000000 | 7.03953e-09 | 1.000000 |
| rad61                         | 4.12272e-09 | 1.000000 | 4.12279e-09 | 1.000000 |
| rad41                         | 2.02448e-09 | 1.000000 | 2.02451e-09 | 1.000000 |
| rad53                         | 1.31432e-09 | 1.000000 | 1.31434e-09 | 1.000000 |
| rad56                         | 7.88430e-10 | 1.000000 | 7.88443e-10 | 1.000000 |
| rad65                         | 5.65101e-10 | 1.000000 | 5.65111e-10 | 1.000000 |
| rad9                          | 4.76632e-10 | 1.000000 | 4.76640e-10 | 1.000000 |
| rad64                         | 4.71855e-10 | 1.000000 | 4.71863e-10 | 1.000000 |
| PAH8+H                        | 3.09752e-10 | 1.000000 | 3.09757e-10 | 1.000000 |
| rad42                         | 2.59222e-10 | 1.000000 | 2.59226e-10 | 1.000000 |
| rad68syn                      | 1.64237e-10 | 1.000000 | 1.64240e-10 | 1.000000 |
| rad68anti                     | 1.08793e-10 | 1.000000 | 1.08795e-10 | 1.000000 |
| rad40syn                      | 7.30619e-11 | 1.000000 | 7.30632e-11 | 1.000000 |
| rad73                         | 6.66001e-11 | 1.000000 | 6.66012e-11 | 1.000000 |
| rad40anti                     | 5.52187e-11 | 1.000000 | 5.52196e-11 | 1.000000 |
| rad71                         | 5.18879e-11 | 1.000000 | 5.18889e-11 | 1.000000 |
| rad12                         | 7.27755e-13 | 1.000000 | 7.27767e-13 | 1.000000 |
| rad72                         | 4.47263e-13 | 1.000000 | 4.47271e-13 | 1.000000 |
| rad15                         | 1.01392e-13 | 1.000000 | 1.01394e-13 | 1.000000 |
| rad23                         | 7.10418e-14 | 1.000000 | 7.10430e-14 | 1.000000 |
| rad19anti                     | 3.42048e-14 | 1.000000 | 3.42054e-14 | 1.000000 |
| rad45                         | 2.13606e-14 | 1.000000 | 2.13610e-14 | 1.000000 |
| rad2                          | 2.06904e-14 | 1.000000 | 2.06908e-14 | 1.000000 |
| rad6                          | 1.55360e-14 | 1.000000 | 1.55363e-14 | 1.000000 |
| rad1                          | 6.14331e-15 | 1.000000 | 6.14341e-15 | 1.000000 |
| rad36                         | 2.27018e-15 | 1.000000 | 2.27022e-15 | 1.000000 |
| rad19syn                      | 1.42443e-15 | 1.000000 | 1.42446e-15 | 1.000000 |
| rad10                         | 5.72026e-16 | 1.000000 | 5.72036e-16 | 1.000000 |
| rad21                         | 2.11576e-16 | 1.000000 | 2.11581e-16 | 1.000000 |
| rad3                          | 2.08838e-16 | 1.000000 | 2.08842e-16 | 1.000000 |
| rad4                          | 1.72473e-16 | 1.000000 | 1.72475e-16 | 1.000000 |
| rad8                          | 6.27706e-17 | 1.000000 | 6.27717e-17 | 1.000000 |
| rad20                         | 4.93253e-17 | 1.000000 | 4.93262e-17 | 1.000000 |
| rad24                         | 3.61522e-17 | 1.000000 | 3.61528e-17 | 1.000000 |
| rad33                         | 2.31465e-17 | 1.000000 | 2.31469e-17 | 1.000000 |
| rad13                         | 2.21773e-17 | 1.000000 | 2.21777e-17 | 1.000000 |
| rad26                         | 1.24406e-17 | 1.000000 | 1.24409e-17 | 1.000000 |
| rad7                          | 4.79492e-18 | 1.000000 | 4.79501e-18 | 1.000000 |
| rad11                         | 2.88036e-18 | 1.000000 | 2.88041e-18 | 1.000000 |
| rad22                         | 2.80159e-18 | 1.000000 | 2.80164e-18 | 1.000000 |

|       |             |          |             |          |
|-------|-------------|----------|-------------|----------|
| rad28 | 2.57669e-18 | 1.000000 | 2.57673e-18 | 1.000000 |
| rad31 | 2.18570e-18 | 1.000000 | 2.18575e-18 | 1.000000 |
| rad25 | 7.69196e-19 | 1.000000 | 7.69210e-19 | 1.000000 |
| rad27 | 5.63388e-19 | 1.000000 | 5.63397e-19 | 1.000000 |
| rad14 | 4.02457e-20 | 1.000000 | 4.02463e-20 | 1.000000 |
| rad47 | 1.62909e-20 | 1.000000 | 1.62911e-20 | 1.000000 |
| rad18 | 4.34991e-21 | 1.000000 | 4.34999e-21 | 1.000000 |
| rad5  | 5.48578e-27 | 1.000000 | 5.48587e-27 | 1.000000 |

0.100000000E-03 Pa, 1100.00000 K

| Rate constant             | True (fraction)       | Effective (fraction)  |
|---------------------------|-----------------------|-----------------------|
| Total                     | 2.81236e-12 (1.00 )   | 2.81222e-12 (1.00 )   |
| Formation of rad19        | 2.25993e-12 (0.804 )  | 2.25980e-12 (0.804 )  |
| H-abstraction to cyc2enyl | 4.30538e-13 (0.153 )  | 4.30538e-13 (0.153 )  |
| H-abstraction to cyclenyl | 1.21896e-13 (0.0433 ) | 1.21889e-13 (0.0433 ) |

| species                       | PYtrue      | Cumul    | PYeffective | Cumul    |
|-------------------------------|-------------|----------|-------------|----------|
| Indene+H                      | 0.745455    | 0.745455 | 0.745493    | 0.745493 |
| Benzene+cycloprop-2-enylidene | 0.153088    | 0.898543 | 0.153095    | 0.898588 |
| PhCHCCH2+H                    | 0.0504085   | 0.948951 | 0.0504110   | 0.948999 |
| Benzene+cycloprop-1-enylidene | 0.0433429   | 0.992294 | 0.0433425   | 0.992342 |
| Ph+MeAc                       | 0.00159989  | 0.993894 | 0.00159997  | 0.993942 |
| C2H2+PhCH2                    | 0.00157393  | 0.995468 | 0.00157401  | 0.995516 |
| Ph+Allene                     | 0.00139377  | 0.996862 | 0.00139384  | 0.996909 |
| PhCCCH3+H                     | 0.000746146 | 0.997608 | 0.000746184 | 0.997656 |
| PhCH2CCH+H                    | 0.000685299 | 0.998293 | 0.000685334 | 0.998341 |
| rad67                         | 0.000551509 | 0.998845 | 0.000551537 | 0.998892 |
| PhCCH+CH3                     | 0.000499927 | 0.999345 | 0.000499952 | 0.999392 |
| rad35                         | 0.000198904 | 0.999544 | 0.000198914 | 0.999591 |
| PhcycC3H3_A+H                 | 0.000160985 | 0.999705 | 0.000160994 | 0.999752 |
| PhcycC3H3_B+H                 | 0.000108569 | 0.999813 | 0.000108575 | 0.999861 |
| Phenyl+cycC3H4                | 4.74535e-05 | 0.999861 | 0.000000    | 0.999861 |
| PAH7+H                        | 4.44306e-05 | 0.999905 | 4.44328e-05 | 0.999905 |
| rad37                         | 3.57976e-05 | 0.999941 | 3.57993e-05 | 0.999941 |
| PAH10+CH3                     | 2.47740e-05 | 0.999966 | 2.47753e-05 | 0.999966 |
| rad39                         | 8.15502e-06 | 0.999974 | 8.15543e-06 | 0.999974 |
| rad30                         | 6.70503e-06 | 0.999981 | 6.70536e-06 | 0.999981 |
| PAH9+H                        | 6.62670e-06 | 0.999987 | 6.62703e-06 | 0.999987 |
| rad38                         | 6.20642e-06 | 0.999993 | 6.20672e-06 | 0.999994 |
| PAH3+H                        | 3.44989e-06 | 0.999997 | 3.45006e-06 | 0.999997 |
| rad46                         | 7.53033e-07 | 0.999998 | 7.53070e-07 | 0.999998 |
| rad54                         | 4.48842e-07 | 0.999998 | 4.48864e-07 | 0.999998 |
| rad60syn                      | 4.32688e-07 | 0.999998 | 4.32709e-07 | 0.999999 |
| rad59                         | 3.79560e-07 | 0.999999 | 3.79579e-07 | 0.999999 |
| rad50                         | 3.42341e-07 | 0.999999 | 3.42358e-07 | 0.999999 |
| PAH1+H                        | 2.85109e-07 | 0.999999 | 2.85123e-07 | 1.000000 |
| rad60anti                     | 2.61576e-07 | 1.000000 | 2.61589e-07 | 1.000000 |
| rad43                         | 1.34197e-07 | 1.000000 | 1.34204e-07 | 1.000000 |
| rad70                         | 9.71315e-08 | 1.000000 | 9.71362e-08 | 1.000000 |
| rad51                         | 5.83467e-08 | 1.000000 | 5.83496e-08 | 1.000000 |
| rad55                         | 2.73128e-08 | 1.000000 | 2.73142e-08 | 1.000000 |
| rad52                         | 2.29834e-08 | 1.000000 | 2.29845e-08 | 1.000000 |
| rad58                         | 1.92025e-08 | 1.000000 | 1.92034e-08 | 1.000000 |
| rad34                         | 1.87451e-08 | 1.000000 | 1.87461e-08 | 1.000000 |
| rad61                         | 1.28390e-08 | 1.000000 | 1.28397e-08 | 1.000000 |
| rad62                         | 1.28154e-08 | 1.000000 | 1.28161e-08 | 1.000000 |
| rad41                         | 5.04814e-09 | 1.000000 | 5.04840e-09 | 1.000000 |
| rad53                         | 3.43665e-09 | 1.000000 | 3.43682e-09 | 1.000000 |
| rad56                         | 2.33966e-09 | 1.000000 | 2.33978e-09 | 1.000000 |
| rad65                         | 1.78385e-09 | 1.000000 | 1.78394e-09 | 1.000000 |
| PAH8+H                        | 1.24981e-09 | 1.000000 | 1.24987e-09 | 1.000000 |
| rad64                         | 1.19311e-09 | 1.000000 | 1.19317e-09 | 1.000000 |
| rad42                         | 5.61778e-10 | 1.000000 | 5.61806e-10 | 1.000000 |
| rad68syn                      | 5.31778e-10 | 1.000000 | 5.31805e-10 | 1.000000 |
| rad9                          | 4.20628e-10 | 1.000000 | 4.20650e-10 | 1.000000 |
| rad68anti                     | 3.50889e-10 | 1.000000 | 3.50907e-10 | 1.000000 |
| rad73                         | 3.32912e-10 | 1.000000 | 3.32929e-10 | 1.000000 |
| rad71                         | 2.96148e-10 | 1.000000 | 2.96163e-10 | 1.000000 |
| rad40syn                      | 2.67659e-10 | 1.000000 | 2.67673e-10 | 1.000000 |
| rad40anti                     | 2.04456e-10 | 1.000000 | 2.04466e-10 | 1.000000 |
| rad72                         | 3.56697e-12 | 1.000000 | 3.56715e-12 | 1.000000 |
| rad12                         | 7.93740e-13 | 1.000000 | 7.93780e-13 | 1.000000 |
| rad15                         | 9.52591e-14 | 1.000000 | 9.52639e-14 | 1.000000 |
| rad23                         | 6.73798e-14 | 1.000000 | 6.73831e-14 | 1.000000 |
| rad19anti                     | 2.56276e-14 | 1.000000 | 2.56289e-14 | 1.000000 |
| rad45                         | 2.20198e-14 | 1.000000 | 2.20209e-14 | 1.000000 |
| rad2                          | 1.62597e-14 | 1.000000 | 1.62606e-14 | 1.000000 |

|          |             |         |             |         |
|----------|-------------|---------|-------------|---------|
| rad6     | 1.07375e-14 | 1.00000 | 1.07380e-14 | 1.00000 |
| rad1     | 4.76786e-15 | 1.00000 | 4.76810e-15 | 1.00000 |
| rad36    | 2.29278e-15 | 1.00000 | 2.29288e-15 | 1.00000 |
| rad19syn | 1.28391e-15 | 1.00000 | 1.28398e-15 | 1.00000 |
| rad21    | 9.63737e-16 | 1.00000 | 9.63784e-16 | 1.00000 |
| rad8     | 7.65078e-16 | 1.00000 | 7.65117e-16 | 1.00000 |
| rad10    | 4.89598e-16 | 1.00000 | 4.89622e-16 | 1.00000 |
| rad13    | 3.15659e-16 | 1.00000 | 3.15675e-16 | 1.00000 |
| rad20    | 2.48657e-16 | 1.00000 | 2.48669e-16 | 1.00000 |
| rad3     | 1.51422e-16 | 1.00000 | 1.51430e-16 | 1.00000 |
| rad4     | 1.24426e-16 | 1.00000 | 1.24433e-16 | 1.00000 |
| rad33    | 8.69060e-17 | 1.00000 | 8.69109e-17 | 1.00000 |
| rad24    | 7.72326e-17 | 1.00000 | 7.72364e-17 | 1.00000 |
| rad11    | 5.71813e-17 | 1.00000 | 5.71841e-17 | 1.00000 |
| rad26    | 9.20826e-18 | 1.00000 | 9.20874e-18 | 1.00000 |
| rad25    | 7.88056e-18 | 1.00000 | 7.88095e-18 | 1.00000 |
| rad7     | 6.52280e-18 | 1.00000 | 6.52312e-18 | 1.00000 |
| rad27    | 4.73322e-18 | 1.00000 | 4.73346e-18 | 1.00000 |
| rad22    | 2.98295e-18 | 1.00000 | 2.98310e-18 | 1.00000 |
| rad31    | 2.41068e-18 | 1.00000 | 2.41079e-18 | 1.00000 |
| rad28    | 1.93098e-18 | 1.00000 | 1.93107e-18 | 1.00000 |
| rad18    | 4.94936e-19 | 1.00000 | 4.94961e-19 | 1.00000 |
| rad14    | 3.73428e-19 | 1.00000 | 3.73447e-19 | 1.00000 |
| rad47    | 5.24231e-20 | 1.00000 | 5.24257e-20 | 1.00000 |
| rad5     | 1.46155e-25 | 1.00000 | 1.46162e-25 | 1.00000 |

0.100000000E-03 Pa, 1200.00000 K

| Rate constant             | True (fraction)       | Effective (fraction)  |
|---------------------------|-----------------------|-----------------------|
| Total                     | 3.72623e-12 (1.00 )   | 3.72576e-12 (1.00 )   |
| Formation of rad19        | 2.86288e-12 (0.768 )  | 2.86245e-12 (0.768 )  |
| H-abstraction to cyc2enyl | 6.53266e-13 (0.175 )  | 6.53266e-13 (0.175 )  |
| H-abstraction to cyclenyl | 2.10085e-13 (0.0564 ) | 2.10053e-13 (0.0564 ) |

| species                       | PYtrue      | Cumul    | PYeffective | Cumul    |
|-------------------------------|-------------|----------|-------------|----------|
| Indene+H                      | 0.687506    | 0.687506 | 0.687593    | 0.687593 |
| Benzene+cycloprop-2-enylidene | 0.175315    | 0.862821 | 0.175337    | 0.862930 |
| PhCHCCH2+H                    | 0.0694470   | 0.932268 | 0.0694557   | 0.932386 |
| Benzene+cycloprop-1-enylidene | 0.0563801   | 0.988648 | 0.0563786   | 0.988764 |
| Ph+MeAc                       | 0.00227272  | 0.990921 | 0.00227301  | 0.991037 |
| C2H2+PhCH2                    | 0.00219121  | 0.993112 | 0.00219148  | 0.993229 |
| Ph+Allene                     | 0.00207994  | 0.995192 | 0.00208020  | 0.995309 |
| PhCH2CCH+H                    | 0.00110691  | 0.996299 | 0.00110706  | 0.996416 |
| PhCCCH3+H                     | 0.00101200  | 0.997311 | 0.00101213  | 0.997428 |
| rad67                         | 0.000806305 | 0.998117 | 0.000806406 | 0.998235 |
| PhCCH+CH3                     | 0.000645716 | 0.998763 | 0.000645798 | 0.998880 |
| PhcycC3H3_A+H                 | 0.000345598 | 0.999109 | 0.000345641 | 0.999226 |
| rad35                         | 0.000290169 | 0.999399 | 0.000290206 | 0.999516 |
| PhcycC3H3_B+H                 | 0.000261273 | 0.999660 | 0.000261306 | 0.999778 |
| Phenyl+cycC3H4                | 0.000117514 | 0.999778 | 0.000000    | 0.999778 |
| PAH7+H                        | 6.09151e-05 | 0.999838 | 6.09229e-05 | 0.999839 |
| rad37                         | 5.50993e-05 | 0.999894 | 5.51063e-05 | 0.999894 |
| PAH10+CH3                     | 4.81021e-05 | 0.999942 | 4.81082e-05 | 0.999942 |
| PAH9+H                        | 1.22285e-05 | 0.999954 | 1.22300e-05 | 0.999954 |
| rad38                         | 1.12958e-05 | 0.999965 | 1.12972e-05 | 0.999965 |
| rad39                         | 1.06983e-05 | 0.999976 | 1.06996e-05 | 0.999976 |
| rad30                         | 1.03391e-05 | 0.999986 | 1.03403e-05 | 0.999986 |
| PAH3+H                        | 6.91379e-06 | 0.999993 | 6.91466e-06 | 0.999993 |
| rad46                         | 1.50176e-06 | 0.999995 | 1.50195e-06 | 0.999995 |
| rad50                         | 8.20642e-07 | 0.999995 | 8.20743e-07 | 0.999996 |
| rad54                         | 7.81497e-07 | 0.999996 | 7.81598e-07 | 0.999996 |
| rad60syn                      | 7.65102e-07 | 0.999997 | 7.65199e-07 | 0.999997 |
| rad59                         | 7.35018e-07 | 0.999998 | 7.35111e-07 | 0.999998 |
| PAH1+H                        | 6.15259e-07 | 0.999998 | 6.15337e-07 | 0.999998 |
| rad60anti                     | 4.66711e-07 | 0.999999 | 4.66769e-07 | 0.999999 |
| rad43                         | 2.45550e-07 | 0.999999 | 2.45581e-07 | 0.999999 |
| rad70                         | 1.92605e-07 | 0.999999 | 1.92629e-07 | 0.999999 |
| rad51                         | 1.60721e-07 | 0.999999 | 1.60741e-07 | 1.000000 |
| rad52                         | 5.89509e-08 | 1.000000 | 5.89583e-08 | 1.000000 |
| rad55                         | 4.99974e-08 | 1.000000 | 5.00038e-08 | 1.000000 |
| rad58                         | 4.53331e-08 | 1.000000 | 4.53389e-08 | 1.000000 |
| rad34                         | 3.98655e-08 | 1.000000 | 3.98705e-08 | 1.000000 |
| rad61                         | 3.33579e-08 | 1.000000 | 3.33621e-08 | 1.000000 |
| rad62                         | 2.11968e-08 | 1.000000 | 2.11994e-08 | 1.000000 |
| rad41                         | 1.09917e-08 | 1.000000 | 1.09931e-08 | 1.000000 |
| rad53                         | 7.65059e-09 | 1.000000 | 7.65156e-09 | 1.000000 |
| rad56                         | 5.79402e-09 | 1.000000 | 5.79474e-09 | 1.000000 |
| rad65                         | 4.84114e-09 | 1.000000 | 4.84175e-09 | 1.000000 |

|           |             |          |             |          |
|-----------|-------------|----------|-------------|----------|
| PAH8+H    | 4.08163e-09 | 1.000000 | 4.08215e-09 | 1.000000 |
| rad64     | 2.59994e-09 | 1.000000 | 2.60027e-09 | 1.000000 |
| rad68syn  | 1.43965e-09 | 1.000000 | 1.43983e-09 | 1.000000 |
| rad73     | 1.32831e-09 | 1.000000 | 1.32848e-09 | 1.000000 |
| rad71     | 1.32075e-09 | 1.000000 | 1.32092e-09 | 1.000000 |
| rad42     | 1.07985e-09 | 1.000000 | 1.07999e-09 | 1.000000 |
| rad68anti | 9.46805e-10 | 1.000000 | 9.46926e-10 | 1.000000 |
| rad40syn  | 8.05959e-10 | 1.000000 | 8.06061e-10 | 1.000000 |
| rad40anti | 6.21769e-10 | 1.000000 | 6.21848e-10 | 1.000000 |
| rad9      | 3.01825e-10 | 1.000000 | 3.01863e-10 | 1.000000 |
| rad72     | 2.08614e-11 | 1.000000 | 2.08641e-11 | 1.000000 |
| rad12     | 7.13601e-13 | 1.000000 | 7.13691e-13 | 1.000000 |
| rad15     | 7.79499e-14 | 1.000000 | 7.79601e-14 | 1.000000 |
| rad23     | 6.23190e-14 | 1.000000 | 6.23268e-14 | 1.000000 |
| rad45     | 2.15125e-14 | 1.000000 | 2.15153e-14 | 1.000000 |
| rad19anti | 1.93811e-14 | 1.000000 | 1.93836e-14 | 1.000000 |
| rad2      | 1.23640e-14 | 1.000000 | 1.23655e-14 | 1.000000 |
| rad6      | 9.03119e-15 | 1.000000 | 9.03233e-15 | 1.000000 |
| rad1      | 3.60949e-15 | 1.000000 | 3.60994e-15 | 1.000000 |
| rad8      | 2.53541e-15 | 1.000000 | 2.53574e-15 | 1.000000 |
| rad36     | 2.22963e-15 | 1.000000 | 2.22991e-15 | 1.000000 |
| rad21     | 2.06285e-15 | 1.000000 | 2.06311e-15 | 1.000000 |
| rad13     | 1.26214e-15 | 1.000000 | 1.26230e-15 | 1.000000 |
| rad19syn  | 1.13955e-15 | 1.000000 | 1.13970e-15 | 1.000000 |
| rad11     | 9.76554e-16 | 1.000000 | 9.76674e-16 | 1.000000 |
| rad20     | 5.30463e-16 | 1.000000 | 5.30530e-16 | 1.000000 |
| rad10     | 4.38021e-16 | 1.000000 | 4.38076e-16 | 1.000000 |
| rad33     | 1.49700e-16 | 1.000000 | 1.49719e-16 | 1.000000 |
| rad24     | 1.18501e-16 | 1.000000 | 1.18516e-16 | 1.000000 |
| rad3      | 1.07566e-16 | 1.000000 | 1.07579e-16 | 1.000000 |
| rad4      | 8.79709e-17 | 1.000000 | 8.79824e-17 | 1.000000 |
| rad7      | 7.29859e-17 | 1.000000 | 7.29951e-17 | 1.000000 |
| rad25     | 2.92600e-17 | 1.000000 | 2.92638e-17 | 1.000000 |
| rad18     | 1.64178e-17 | 1.000000 | 1.64198e-17 | 1.000000 |
| rad27     | 1.52387e-17 | 1.000000 | 1.52406e-17 | 1.000000 |
| rad26     | 7.07252e-18 | 1.000000 | 7.07342e-18 | 1.000000 |
| rad22     | 3.03747e-18 | 1.000000 | 3.03785e-18 | 1.000000 |
| rad31     | 2.55729e-18 | 1.000000 | 2.55762e-18 | 1.000000 |
| rad28     | 1.55165e-18 | 1.000000 | 1.55185e-18 | 1.000000 |
| rad14     | 1.32735e-18 | 1.000000 | 1.32751e-18 | 1.000000 |
| rad47     | 1.43379e-19 | 1.000000 | 1.43397e-19 | 1.000000 |
| rad5      | 6.16013e-24 | 1.000000 | 6.16091e-24 | 1.000000 |

0.100000000E-03 Pa, 1300.00000 K

| Rate constant             | True (fraction)       | Effective (fraction)  |
|---------------------------|-----------------------|-----------------------|
| Total                     | 4.84401e-12 (1.00 )   | 4.84262e-12 (1.00 )   |
| Formation of rad19        | 3.55537e-12 (0.734 )  | 3.55411e-12 (0.734 )  |
| H-abstraction to cyc2enyl | 9.48893e-13 (0.196 )  | 9.48893e-13 (0.196 )  |
| H-abstraction to cyclenyl | 3.39740e-13 (0.0701 ) | 3.39620e-13 (0.0701 ) |

| species                       | PYtrue      | Cumul    | PYeffective | Cumul    |
|-------------------------------|-------------|----------|-------------|----------|
| Indene+H                      | 0.627161    | 0.627161 | 0.627340    | 0.627340 |
| Benzene+cycloprop-2-enylidene | 0.195890    | 0.823052 | 0.195946    | 0.823286 |
| PhCHCCH2+H                    | 0.0908777   | 0.913929 | 0.0909037   | 0.914190 |
| Benzene+cycloprop-1-enylidene | 0.0701362   | 0.984065 | 0.0701313   | 0.984321 |
| Ph+MeAc                       | 0.00304441  | 0.987110 | 0.00304527  | 0.987366 |
| C2H2+PhCH2                    | 0.00290372  | 0.990014 | 0.00290454  | 0.990271 |
| Ph+Allene                     | 0.00288470  | 0.992898 | 0.00288553  | 0.993157 |
| PhCH2CCH+H                    | 0.00165448  | 0.994553 | 0.00165495  | 0.994812 |
| PhCCCH3+H                     | 0.00130153  | 0.995854 | 0.00130190  | 0.996113 |
| rad67                         | 0.00110883  | 0.996963 | 0.00110915  | 0.997223 |
| PhCCH+CH3                     | 0.000809514 | 0.997773 | 0.000809751 | 0.998032 |
| PhcycC3H3_A+H                 | 0.000673391 | 0.998446 | 0.000673584 | 0.998706 |
| PhcycC3H3_B+H                 | 0.000561394 | 0.999007 | 0.000561554 | 0.999267 |
| rad35                         | 0.000398725 | 0.999406 | 0.000398838 | 0.999666 |
| Phenyl+cycC3H4                | 0.000260506 | 0.999667 | 0.000000    | 0.999666 |
| PAH10+CH3                     | 8.38007e-05 | 0.999750 | 8.38250e-05 | 0.999750 |
| PAH7+H                        | 7.89117e-05 | 0.999829 | 7.89341e-05 | 0.999829 |
| rad37                         | 7.83568e-05 | 0.999908 | 7.83785e-05 | 0.999907 |
| PAH9+H                        | 2.08511e-05 | 0.999929 | 2.08571e-05 | 0.999928 |
| rad38                         | 1.88167e-05 | 0.999947 | 1.88221e-05 | 0.999947 |
| rad30                         | 1.49360e-05 | 0.999962 | 1.49402e-05 | 0.999962 |
| rad39                         | 1.33374e-05 | 0.999976 | 1.33412e-05 | 0.999975 |
| PAH3+H                        | 1.25732e-05 | 0.999988 | 1.25768e-05 | 0.999988 |
| rad46                         | 2.73965e-06 | 0.999991 | 2.74043e-06 | 0.999991 |
| rad50                         | 1.75696e-06 | 0.999993 | 1.75746e-06 | 0.999992 |
| rad59                         | 1.29584e-06 | 0.999994 | 1.29620e-06 | 0.999994 |

|           |             |          |             |          |
|-----------|-------------|----------|-------------|----------|
| rad60syn  | 1.24692e-06 | 0.999995 | 1.24728e-06 | 0.999995 |
| rad54     | 1.23055e-06 | 0.999996 | 1.23091e-06 | 0.999996 |
| PAH1+H    | 1.18164e-06 | 0.999998 | 1.18197e-06 | 0.999997 |
| rad60anti | 7.66599e-07 | 0.999998 | 7.66824e-07 | 0.999998 |
| rad43     | 4.10006e-07 | 0.999999 | 4.10123e-07 | 0.999999 |
| rad51     | 3.87406e-07 | 0.999999 | 3.87517e-07 | 0.999999 |
| rad70     | 3.43677e-07 | 1.000000 | 3.43775e-07 | 0.999999 |
| rad52     | 1.33628e-07 | 1.000000 | 1.33666e-07 | 0.999999 |
| rad58     | 9.48433e-08 | 1.000000 | 9.48705e-08 | 1.000000 |
| rad55     | 8.22139e-08 | 1.000000 | 8.22375e-08 | 1.000000 |
| rad34     | 7.56235e-08 | 1.000000 | 7.56447e-08 | 1.000000 |
| rad61     | 7.45086e-08 | 1.000000 | 7.45298e-08 | 1.000000 |
| rad62     | 3.23565e-08 | 1.000000 | 3.23657e-08 | 1.000000 |
| rad41     | 2.13212e-08 | 1.000000 | 2.13273e-08 | 1.000000 |
| rad53     | 1.49188e-08 | 1.000000 | 1.49231e-08 | 1.000000 |
| rad56     | 1.23746e-08 | 1.000000 | 1.23782e-08 | 1.000000 |
| rad65     | 1.15036e-08 | 1.000000 | 1.15069e-08 | 1.000000 |
| PAH8+H    | 1.11832e-08 | 1.000000 | 1.11864e-08 | 1.000000 |
| rad64     | 5.02551e-09 | 1.000000 | 5.02694e-09 | 1.000000 |
| rad71     | 4.76253e-09 | 1.000000 | 4.76389e-09 | 1.000000 |
| rad73     | 4.36514e-09 | 1.000000 | 4.36638e-09 | 1.000000 |
| rad68syn  | 3.35945e-09 | 1.000000 | 3.36041e-09 | 1.000000 |
| rad68anti | 2.20311e-09 | 1.000000 | 2.20373e-09 | 1.000000 |
| rad40syn  | 2.06131e-09 | 1.000000 | 2.06190e-09 | 1.000000 |
| rad42     | 1.87919e-09 | 1.000000 | 1.87972e-09 | 1.000000 |
| rad40anti | 1.60444e-09 | 1.000000 | 1.60490e-09 | 1.000000 |
| rad9      | 1.99152e-10 | 1.000000 | 1.99209e-10 | 1.000000 |
| rad72     | 9.34613e-11 | 1.000000 | 9.34878e-11 | 1.000000 |
| rad12     | 5.89853e-13 | 1.000000 | 5.90021e-13 | 1.000000 |
| rad15     | 1.21929e-13 | 1.000000 | 1.21964e-13 | 1.000000 |
| rad23     | 5.69796e-14 | 1.000000 | 5.69959e-14 | 1.000000 |
| rad45     | 2.03484e-14 | 1.000000 | 2.03542e-14 | 1.000000 |
| rad19anti | 1.48394e-14 | 1.000000 | 1.48436e-14 | 1.000000 |
| rad6      | 1.00718e-14 | 1.000000 | 1.00747e-14 | 1.000000 |
| rad2      | 9.22495e-15 | 1.000000 | 9.22761e-15 | 1.000000 |
| rad11     | 5.71015e-15 | 1.000000 | 5.71177e-15 | 1.000000 |
| rad8      | 4.42248e-15 | 1.000000 | 4.42375e-15 | 1.000000 |
| rad21     | 3.03536e-15 | 1.000000 | 3.03622e-15 | 1.000000 |
| rad1      | 2.70505e-15 | 1.000000 | 2.70582e-15 | 1.000000 |
| rad13     | 2.24564e-15 | 1.000000 | 2.24628e-15 | 1.000000 |
| rad36     | 2.11456e-15 | 1.000000 | 2.11516e-15 | 1.000000 |
| rad19syn  | 1.00706e-15 | 1.000000 | 1.00735e-15 | 1.000000 |
| rad7      | 8.25001e-16 | 1.000000 | 8.25237e-16 | 1.000000 |
| rad10     | 8.19357e-16 | 1.000000 | 8.19593e-16 | 1.000000 |
| rad20     | 7.38172e-16 | 1.000000 | 7.38377e-16 | 1.000000 |
| rad33     | 1.76734e-16 | 1.000000 | 1.76784e-16 | 1.000000 |
| rad18     | 1.53538e-16 | 1.000000 | 1.53582e-16 | 1.000000 |
| rad24     | 1.53474e-16 | 1.000000 | 1.53518e-16 | 1.000000 |
| rad3      | 7.57696e-17 | 1.000000 | 7.57915e-17 | 1.000000 |
| rad4      | 6.16570e-17 | 1.000000 | 6.16746e-17 | 1.000000 |
| rad25     | 5.66799e-17 | 1.000000 | 5.66960e-17 | 1.000000 |
| rad27     | 2.70871e-17 | 1.000000 | 2.70948e-17 | 1.000000 |
| rad26     | 6.88245e-18 | 1.000000 | 6.88441e-18 | 1.000000 |
| rad22     | 2.95767e-18 | 1.000000 | 2.95852e-18 | 1.000000 |
| rad31     | 2.62744e-18 | 1.000000 | 2.62819e-18 | 1.000000 |
| rad14     | 2.40837e-18 | 1.000000 | 2.40906e-18 | 1.000000 |
| rad28     | 1.44752e-18 | 1.000000 | 1.44793e-18 | 1.000000 |
| rad47     | 3.40948e-19 | 1.000000 | 3.41046e-19 | 1.000000 |
| rad5      | 3.04617e-22 | 1.000000 | 3.04705e-22 | 1.000000 |

0.100000000E-03 Pa, 1400.00000 K

=====

| Rate constant             | True (fraction)       | Effective (fraction)  |
|---------------------------|-----------------------|-----------------------|
| Total                     | 6.19360e-12 (1.00 )   | 6.18997e-12 (1.00 )   |
| Formation of rad19        | 4.34185e-12 (0.701 )  | 4.33861e-12 (0.701 )  |
| H-abstraction to cyc2enyl | 1.32990e-12 (0.215 )  | 1.32990e-12 (0.215 )  |
| H-abstraction to cyclenyl | 5.21850e-13 (0.0843 ) | 5.21461e-13 (0.0842 ) |

| species                       | PYtrue     | Cumul    | PYeffective | Cumul    |
|-------------------------------|------------|----------|-------------|----------|
| Indene+H                      | 0.566028   | 0.566028 | 0.566360    | 0.566360 |
| Benzene+cycloprop-2-enylidene | 0.214721   | 0.780749 | 0.214847    | 0.781207 |
| PhCHCCH2+H                    | 0.113526   | 0.894275 | 0.113593    | 0.894800 |
| Benzene+cycloprop-1-enylidene | 0.0842564  | 0.978532 | 0.0842429   | 0.979043 |
| Ph+MeAc                       | 0.00387284 | 0.982405 | 0.00387511  | 0.982918 |
| Ph+Allene                     | 0.00376036 | 0.986165 | 0.00376256  | 0.986680 |
| C2H2+PhCH2                    | 0.00367929 | 0.989844 | 0.00368145  | 0.990362 |
| PhCH2CCH+H                    | 0.00231297 | 0.992157 | 0.00231433  | 0.992676 |
| PhCCCH3+H                     | 0.00159640 | 0.993754 | 0.00159734  | 0.994274 |

|                |             |          |             |          |
|----------------|-------------|----------|-------------|----------|
| rad67          | 0.00144409  | 0.995198 | 0.00144494  | 0.995719 |
| PhcycC3H3_A+H  | 0.00120489  | 0.996403 | 0.00120559  | 0.996924 |
| PhcycC3H3_B+H  | 0.00109183  | 0.997495 | 0.00109247  | 0.998017 |
| PhCCH+CH3      | 0.000988680 | 0.998483 | 0.000989264 | 0.999006 |
| Phenyl+cycC3H4 | 0.000523345 | 0.999007 | 0.000000    | 0.999006 |
| rad35          | 0.000519418 | 0.999526 | 0.000519722 | 0.999526 |
| PAH10+CH3      | 0.000132940 | 0.999659 | 0.000133019 | 0.999659 |
| rad37          | 0.000103969 | 0.999763 | 0.000104030 | 0.999763 |
| PAH7+H         | 9.76629e-05 | 0.999861 | 9.77202e-05 | 0.999860 |
| PAH9+H         | 3.30451e-05 | 0.999894 | 3.30646e-05 | 0.999893 |
| rad38          | 2.89869e-05 | 0.999923 | 2.90039e-05 | 0.999922 |
| PAH3+H         | 2.09773e-05 | 0.999944 | 2.09896e-05 | 0.999943 |
| rad30          | 2.03484e-05 | 0.999964 | 2.03603e-05 | 0.999964 |
| rad39          | 1.60326e-05 | 0.999980 | 1.60420e-05 | 0.999980 |
| rad46          | 4.60489e-06 | 0.999985 | 4.60759e-06 | 0.999984 |
| rad50          | 3.39256e-06 | 0.999988 | 3.39455e-06 | 0.999988 |
| rad59          | 2.10237e-06 | 0.999990 | 2.10360e-06 | 0.999990 |
| PAH1+H         | 2.05214e-06 | 0.999992 | 2.05334e-06 | 0.999992 |
| rad60syn       | 1.88965e-06 | 0.999994 | 1.89076e-06 | 0.999994 |
| rad54          | 1.78086e-06 | 0.999996 | 1.78190e-06 | 0.999996 |
| rad60anti      | 1.16973e-06 | 0.999997 | 1.17042e-06 | 0.999997 |
| rad51          | 8.27129e-07 | 0.999998 | 8.27613e-07 | 0.999998 |
| rad43          | 6.31782e-07 | 0.999998 | 6.32153e-07 | 0.999998 |
| rad70          | 5.60217e-07 | 0.999999 | 5.60546e-07 | 0.999999 |
| rad52          | 2.70713e-07 | 0.999999 | 2.70872e-07 | 0.999999 |
| rad58          | 1.78428e-07 | 0.999999 | 1.78532e-07 | 0.999999 |
| rad61          | 1.46277e-07 | 1.000000 | 1.46363e-07 | 0.999999 |
| rad34          | 1.30056e-07 | 1.000000 | 1.30132e-07 | 1.000000 |
| rad55          | 1.23571e-07 | 1.000000 | 1.23644e-07 | 1.000000 |
| rad62          | 4.61529e-08 | 1.000000 | 4.61799e-08 | 1.000000 |
| rad41          | 3.74002e-08 | 1.000000 | 3.74221e-08 | 1.000000 |
| PAH8+H         | 2.63148e-08 | 1.000000 | 2.63303e-08 | 1.000000 |
| rad53          | 2.60384e-08 | 1.000000 | 2.60537e-08 | 1.000000 |
| rad65          | 2.42340e-08 | 1.000000 | 2.42482e-08 | 1.000000 |
| rad56          | 2.33522e-08 | 1.000000 | 2.33659e-08 | 1.000000 |
| rad71          | 1.41523e-08 | 1.000000 | 1.41606e-08 | 1.000000 |
| rad73          | 1.20322e-08 | 1.000000 | 1.20393e-08 | 1.000000 |
| rad64          | 8.79755e-09 | 1.000000 | 8.80273e-09 | 1.000000 |
| rad68syn       | 6.90097e-09 | 1.000000 | 6.90502e-09 | 1.000000 |
| rad40syn       | 4.57744e-09 | 1.000000 | 4.58013e-09 | 1.000000 |
| rad68anti      | 4.51464e-09 | 1.000000 | 4.51729e-09 | 1.000000 |
| rad40anti      | 3.59045e-09 | 1.000000 | 3.59256e-09 | 1.000000 |
| rad42          | 3.00666e-09 | 1.000000 | 3.00843e-09 | 1.000000 |
| rad72          | 3.28506e-10 | 1.000000 | 3.28699e-10 | 1.000000 |
| rad9           | 1.26985e-10 | 1.000000 | 1.27060e-10 | 1.000000 |
| rad12          | 4.68957e-13 | 1.000000 | 4.69231e-13 | 1.000000 |
| rad15          | 3.78239e-13 | 1.000000 | 3.78461e-13 | 1.000000 |
| rad23          | 5.17376e-14 | 1.000000 | 5.17679e-14 | 1.000000 |
| rad45          | 1.88206e-14 | 1.000000 | 1.88317e-14 | 1.000000 |
| rad11          | 1.45009e-14 | 1.000000 | 1.45094e-14 | 1.000000 |
| rad6           | 1.28439e-14 | 1.000000 | 1.28515e-14 | 1.000000 |
| rad19anti      | 1.15118e-14 | 1.000000 | 1.15186e-14 | 1.000000 |
| rad2           | 6.82571e-15 | 1.000000 | 6.82971e-15 | 1.000000 |
| rad8           | 5.66687e-15 | 1.000000 | 5.67019e-15 | 1.000000 |
| rad21          | 3.67060e-15 | 1.000000 | 3.67275e-15 | 1.000000 |
| rad7           | 3.49064e-15 | 1.000000 | 3.49268e-15 | 1.000000 |
| rad13          | 2.61027e-15 | 1.000000 | 2.61180e-15 | 1.000000 |
| rad10          | 2.56609e-15 | 1.000000 | 2.56759e-15 | 1.000000 |
| rad1           | 2.02167e-15 | 1.000000 | 2.02286e-15 | 1.000000 |
| rad36          | 1.96678e-15 | 1.000000 | 1.96794e-15 | 1.000000 |
| rad19syn       | 8.90593e-16 | 1.000000 | 8.91116e-16 | 1.000000 |
| rad20          | 8.28826e-16 | 1.000000 | 8.29317e-16 | 1.000000 |
| rad18          | 5.37840e-16 | 1.000000 | 5.38155e-16 | 1.000000 |
| rad24          | 1.80313e-16 | 1.000000 | 1.80420e-16 | 1.000000 |
| rad33          | 1.72625e-16 | 1.000000 | 1.72727e-16 | 1.000000 |
| rad25          | 7.72646e-17 | 1.000000 | 7.73097e-17 | 1.000000 |
| rad3           | 5.33072e-17 | 1.000000 | 5.33385e-17 | 1.000000 |
| rad4           | 4.31031e-17 | 1.000000 | 4.31283e-17 | 1.000000 |
| rad27          | 3.50745e-17 | 1.000000 | 3.50950e-17 | 1.000000 |
| rad26          | 2.88103e-17 | 1.000000 | 2.88272e-17 | 1.000000 |
| rad14          | 3.02575e-18 | 1.000000 | 3.02752e-18 | 1.000000 |
| rad22          | 2.83270e-18 | 1.000000 | 2.83436e-18 | 1.000000 |
| rad31          | 2.62635e-18 | 1.000000 | 2.62789e-18 | 1.000000 |
| rad28          | 1.83595e-18 | 1.000000 | 1.83702e-18 | 1.000000 |
| rad47          | 7.15113e-19 | 1.000000 | 7.15531e-19 | 1.000000 |
| rad5           | 1.24532e-20 | 1.000000 | 1.24604e-20 | 1.000000 |

0.100000000E-03 Pa, 1500.00000 K

=====  
Rate constant | True (fraction)                      Effective (fraction)



|                           |                       |                       |
|---------------------------|-----------------------|-----------------------|
| Total                     | 7.80417e-12 (1.00 )   | 7.79561e-12 (1.00 )   |
| Formation of rad19        | 5.22661e-12 (0.670 )  | 5.21915e-12 (0.669 )  |
| H-abstraction to cyc2enyl | 1.80920e-12 (0.232 )  | 1.80920e-12 (0.232 )  |
| H-abstraction to cyclenyl | 7.68359e-13 (0.0985 ) | 7.67262e-13 (0.0984 ) |

| species                       | PYtrue      | Cumul    | PYeffective | Cumul    |
|-------------------------------|-------------|----------|-------------|----------|
| Indene+H                      | 0.505870    | 0.505870 | 0.506425    | 0.506425 |
| Benzene+cycloprop-2-enylidene | 0.231825    | 0.737695 | 0.232079    | 0.738505 |
| PhCHCCH2+H                    | 0.135967    | 0.873662 | 0.136116    | 0.874621 |
| Benzene+cycloprop-1-enylidene | 0.0984549   | 0.972117 | 0.0984223   | 0.973043 |
| Ph+MeAc                       | 0.00470570  | 0.976823 | 0.00471086  | 0.977754 |
| Ph+Allene                     | 0.00464760  | 0.981470 | 0.00465271  | 0.982407 |
| C2H2+PhCH2                    | 0.00447301  | 0.985943 | 0.00447791  | 0.986885 |
| PhCH2CCH+H                    | 0.00304819  | 0.988991 | 0.00305154  | 0.989936 |
| PhcycC3H3_A+H                 | 0.00198976  | 0.990981 | 0.00199195  | 0.991928 |
| PhcycC3H3_B+H                 | 0.00193280  | 0.992914 | 0.00193492  | 0.993863 |
| PhCCCH3+H                     | 0.00187667  | 0.994791 | 0.00187873  | 0.995742 |
| rad67                         | 0.00179097  | 0.996582 | 0.00179294  | 0.997535 |
| PhCCH+CH3                     | 0.00117783  | 0.997759 | 0.00117912  | 0.998714 |
| Phenyl+cycC3H4                | 0.000956146 | 0.998716 | 0.000000    | 0.998714 |
| rad35                         | 0.000644848 | 0.999360 | 0.000645555 | 0.999360 |
| PAH10+CH3                     | 0.000194190 | 0.999555 | 0.000194404 | 0.999554 |
| rad37                         | 0.000129806 | 0.999684 | 0.000129949 | 0.999684 |
| PAH7+H                        | 0.000116417 | 0.999801 | 0.000116546 | 0.999800 |
| PAH9+H                        | 4.88535e-05 | 0.999850 | 4.89071e-05 | 0.999849 |
| rad38                         | 4.16011e-05 | 0.999891 | 4.16467e-05 | 0.999891 |
| PAH3+H                        | 3.23374e-05 | 0.999924 | 3.23729e-05 | 0.999923 |
| rad30                         | 2.62808e-05 | 0.999950 | 2.63097e-05 | 0.999950 |
| rad39                         | 1.87895e-05 | 0.999969 | 1.88102e-05 | 0.999968 |
| rad46                         | 7.16199e-06 | 0.999976 | 7.16986e-06 | 0.999976 |
| rad50                         | 5.93797e-06 | 0.999982 | 5.94449e-06 | 0.999982 |
| PAH1+H                        | 3.25722e-06 | 0.999985 | 3.26081e-06 | 0.999985 |
| rad59                         | 3.16156e-06 | 0.999988 | 3.16503e-06 | 0.999988 |
| rad60syn                      | 2.67968e-06 | 0.999991 | 2.68262e-06 | 0.999991 |
| rad54                         | 2.39838e-06 | 0.999993 | 2.40102e-06 | 0.999993 |
| rad60anti                     | 1.66867e-06 | 0.999995 | 1.67050e-06 | 0.999995 |
| rad51                         | 1.57342e-06 | 0.999996 | 1.57515e-06 | 0.999996 |
| rad43                         | 9.05576e-07 | 0.999997 | 9.06568e-07 | 0.999997 |
| rad70                         | 8.42763e-07 | 0.999998 | 8.43688e-07 | 0.999998 |
| rad52                         | 4.92950e-07 | 0.999999 | 4.93491e-07 | 0.999999 |
| rad58                         | 3.04448e-07 | 0.999999 | 3.04782e-07 | 0.999999 |
| rad61                         | 2.56145e-07 | 0.999999 | 2.56426e-07 | 0.999999 |
| rad34                         | 2.04934e-07 | 1.000000 | 2.05159e-07 | 0.999999 |
| rad55                         | 1.72012e-07 | 1.000000 | 1.72201e-07 | 1.000000 |
| rad62                         | 6.20586e-08 | 1.000000 | 6.21267e-08 | 1.000000 |
| rad41                         | 5.99063e-08 | 1.000000 | 5.99721e-08 | 1.000000 |
| PAH8+H                        | 5.38671e-08 | 1.000000 | 5.39262e-08 | 1.000000 |
| rad65                         | 4.55485e-08 | 1.000000 | 4.55985e-08 | 1.000000 |
| rad53                         | 4.12866e-08 | 1.000000 | 4.13319e-08 | 1.000000 |
| rad56                         | 3.95671e-08 | 1.000000 | 3.96105e-08 | 1.000000 |
| rad71                         | 3.49994e-08 | 1.000000 | 3.50378e-08 | 1.000000 |
| rad73                         | 2.80690e-08 | 1.000000 | 2.80998e-08 | 1.000000 |
| rad64                         | 1.41255e-08 | 1.000000 | 1.41409e-08 | 1.000000 |
| rad68syn                      | 1.26336e-08 | 1.000000 | 1.26475e-08 | 1.000000 |
| rad40syn                      | 8.93581e-09 | 1.000000 | 8.94564e-09 | 1.000000 |
| rad68anti                     | 8.24821e-09 | 1.000000 | 8.25726e-09 | 1.000000 |
| rad40anti                     | 7.05383e-09 | 1.000000 | 7.06153e-09 | 1.000000 |
| rad42                         | 4.46777e-09 | 1.000000 | 4.47268e-09 | 1.000000 |
| rad72                         | 9.20557e-10 | 1.000000 | 9.21571e-10 | 1.000000 |
| rad9                          | 8.02700e-11 | 1.000000 | 8.03579e-11 | 1.000000 |
| rad15                         | 7.55377e-13 | 1.000000 | 7.56205e-13 | 1.000000 |
| rad12                         | 3.66370e-13 | 1.000000 | 3.66772e-13 | 1.000000 |
| rad23                         | 4.64924e-14 | 1.000000 | 4.65435e-14 | 1.000000 |
| rad11                         | 2.20689e-14 | 1.000000 | 2.20931e-14 | 1.000000 |
| rad45                         | 1.71049e-14 | 1.000000 | 1.71236e-14 | 1.000000 |
| rad6                          | 1.64953e-14 | 1.000000 | 1.65134e-14 | 1.000000 |
| rad19anti                     | 9.04718e-15 | 1.000000 | 9.05717e-15 | 1.000000 |
| rad7                          | 7.04586e-15 | 1.000000 | 7.05357e-15 | 1.000000 |
| rad8                          | 6.24614e-15 | 1.000000 | 6.25299e-15 | 1.000000 |
| rad10                         | 5.42481e-15 | 1.000000 | 5.43077e-15 | 1.000000 |
| rad2                          | 5.04028e-15 | 1.000000 | 5.04581e-15 | 1.000000 |
| rad21                         | 3.97611e-15 | 1.000000 | 3.98048e-15 | 1.000000 |
| rad13                         | 2.43540e-15 | 1.000000 | 2.43807e-15 | 1.000000 |
| rad36                         | 1.79921e-15 | 1.000000 | 1.80118e-15 | 1.000000 |
| rad1                          | 1.51267e-15 | 1.000000 | 1.51433e-15 | 1.000000 |
| rad18                         | 1.01393e-15 | 1.000000 | 1.01504e-15 | 1.000000 |
| rad20                         | 8.29636e-16 | 1.000000 | 8.30546e-16 | 1.000000 |
| rad19syn                      | 7.89908e-16 | 1.000000 | 7.90771e-16 | 1.000000 |

|       |             |         |             |          |
|-------|-------------|---------|-------------|----------|
| rad26 | 2.66364e-16 | 1.00000 | 2.66657e-16 | 1.000000 |
| rad24 | 1.99082e-16 | 1.00000 | 1.99301e-16 | 1.000000 |
| rad33 | 1.52243e-16 | 1.00000 | 1.52410e-16 | 1.000000 |
| rad25 | 8.67515e-17 | 1.00000 | 8.68467e-17 | 1.000000 |
| rad27 | 3.81185e-17 | 1.00000 | 3.81603e-17 | 1.000000 |
| rad3  | 3.76248e-17 | 1.00000 | 3.76662e-17 | 1.000000 |
| rad4  | 3.01664e-17 | 1.00000 | 3.01995e-17 | 1.000000 |
| rad28 | 6.13834e-18 | 1.00000 | 6.14508e-18 | 1.000000 |
| rad22 | 5.52827e-18 | 1.00000 | 5.53433e-18 | 1.000000 |
| rad14 | 3.12706e-18 | 1.00000 | 3.13049e-18 | 1.000000 |
| rad31 | 2.56266e-18 | 1.00000 | 2.56547e-18 | 1.000000 |
| rad47 | 1.33181e-18 | 1.00000 | 1.33327e-18 | 1.000000 |
| rad5  | 3.07686e-19 | 1.00000 | 3.08024e-19 | 1.000000 |

0.1000000000E-04 Pa, 20.0000000 K

| Rate constant             | True (fraction)         | Effective (fraction)    |
|---------------------------|-------------------------|-------------------------|
| Total                     | 1.24541e-22 (1.00 )     | 1.24541e-22 (1.00 )     |
| Formation of rad19        | 1.24541e-22 (1.00 )     | 1.24541e-22 (1.00 )     |
| H-abstraction to cyc2enyl | 3.84323e-68 (3.09e-46)  | 3.84323e-68 (3.09e-46)  |
| H-abstraction to cyclenyl | 6.26313e-106 (5.03e-84) | 6.26313e-106 (5.03e-84) |

| species        | PYtrue      | Cumul    | PYeffective | Cumul    |
|----------------|-------------|----------|-------------|----------|
| Indene+H       | 0.999772    | 0.999772 | 0.999772    | 0.999772 |
| PhCHCCH2+H     | 0.000217190 | 0.999989 | 0.000217190 | 0.999989 |
| PhCCH+CH3      | 3.74992e-06 | 0.999993 | 3.74992e-06 | 0.999993 |
| C2H2+PhCH2     | 2.66076e-06 | 0.999996 | 2.66076e-06 | 0.999996 |
| PhCCCH3+H      | 2.10744e-06 | 0.999998 | 2.10744e-06 | 0.999998 |
| Ph+MeAc        | 1.55534e-06 | 0.999999 | 1.55534e-06 | 0.999999 |
| rad67          | 4.72016e-07 | 1.000000 | 4.72016e-07 | 1.000000 |
| rad35          | 2.09059e-07 | 1.000000 | 2.09059e-07 | 1.000000 |
| Ph+Allene      | 1.34634e-07 | 1.000000 | 1.34634e-07 | 1.000000 |
| PAH7+H         | 1.78367e-08 | 1.000000 | 1.78367e-08 | 1.000000 |
| PhCH2CCH+H     | 1.63588e-08 | 1.000000 | 1.63588e-08 | 1.000000 |
| rad39          | 5.03001e-09 | 1.000000 | 5.03001e-09 | 1.000000 |
| rad37          | 4.62671e-09 | 1.000000 | 4.62671e-09 | 1.000000 |
| rad30          | 3.90780e-09 | 1.000000 | 3.90780e-09 | 1.000000 |
| PAH9+H         | 2.53956e-10 | 1.000000 | 2.53956e-10 | 1.000000 |
| rad38          | 1.06936e-10 | 1.000000 | 1.06936e-10 | 1.000000 |
| rad60syn       | 1.69319e-11 | 1.000000 | 1.69319e-11 | 1.000000 |
| rad60anti      | 8.26556e-12 | 1.000000 | 8.26556e-12 | 1.000000 |
| PAH3+H         | 6.72151e-12 | 1.000000 | 6.72151e-12 | 1.000000 |
| rad46          | 6.42583e-12 | 1.000000 | 6.42583e-12 | 1.000000 |
| PAH10+CH3      | 5.52877e-12 | 1.000000 | 5.52877e-12 | 1.000000 |
| rad59          | 1.39467e-12 | 1.000000 | 1.39467e-12 | 1.000000 |
| PhcycC3H3_A+H  | 4.13677e-13 | 1.000000 | 4.13677e-13 | 1.000000 |
| rad43          | 2.58808e-13 | 1.000000 | 2.58808e-13 | 1.000000 |
| rad54          | 2.05769e-13 | 1.000000 | 2.05769e-13 | 1.000000 |
| rad62          | 5.54294e-14 | 1.000000 | 5.54294e-14 | 1.000000 |
| rad50          | 4.23296e-14 | 1.000000 | 4.23296e-14 | 1.000000 |
| rad70          | 3.14334e-15 | 1.000000 | 3.14334e-15 | 1.000000 |
| rad55          | 1.37798e-15 | 1.000000 | 1.37798e-15 | 1.000000 |
| PAH1+H         | 5.58548e-16 | 1.000000 | 5.58548e-16 | 1.000000 |
| rad52          | 2.67799e-16 | 1.000000 | 2.67799e-16 | 1.000000 |
| rad58          | 7.50226e-17 | 1.000000 | 7.50226e-17 | 1.000000 |
| rad51          | 6.49646e-17 | 1.000000 | 6.49646e-17 | 1.000000 |
| rad34          | 2.91017e-17 | 1.000000 | 2.91017e-17 | 1.000000 |
| Phenyl+cycC3H4 | 2.77347e-17 | 1.000000 | 0.000000    | 1.000000 |
| rad42          | 3.04817e-18 | 1.000000 | 3.04817e-18 | 1.000000 |
| rad41          | 2.76402e-18 | 1.000000 | 2.76402e-18 | 1.000000 |
| rad65          | 1.27704e-18 | 1.000000 | 1.27704e-18 | 1.000000 |
| rad6           | 5.15385e-24 | 1.000000 | 5.15385e-24 | 1.000000 |
| rad28          | 7.50099e-27 | 1.000000 | 7.50099e-27 | 1.000000 |
| rad2           | 2.22351e-27 | 1.000000 | 2.22351e-27 | 1.000000 |
| rad26          | 1.34938e-27 | 1.000000 | 1.34938e-27 | 1.000000 |
| rad7           | 3.73471e-28 | 1.000000 | 3.73471e-28 | 1.000000 |
| PhcycC3H3_B+H  | 2.48353e-28 | 1.000000 | 2.48353e-28 | 1.000000 |
| rad1           | 1.40452e-28 | 1.000000 | 1.40452e-28 | 1.000000 |
| rad10          | 1.12371e-28 | 1.000000 | 1.12371e-28 | 1.000000 |
| rad11          | 9.17352e-29 | 1.000000 | 9.17352e-29 | 1.000000 |
| rad3           | 1.40018e-29 | 1.000000 | 1.40018e-29 | 1.000000 |
| rad53          | 1.11931e-29 | 1.000000 | 1.11931e-29 | 1.000000 |
| rad4           | 7.07196e-30 | 1.000000 | 7.07196e-30 | 1.000000 |
| rad47          | 5.36387e-30 | 1.000000 | 5.36387e-30 | 1.000000 |
| rad13          | 2.05342e-30 | 1.000000 | 2.05342e-30 | 1.000000 |
| rad64          | 4.89604e-32 | 1.000000 | 4.89604e-32 | 1.000000 |
| rad9           | 2.96922e-32 | 1.000000 | 2.96922e-32 | 1.000000 |
| rad14          | 4.91474e-33 | 1.000000 | 4.91474e-33 | 1.000000 |

|                               |             |         |             |         |
|-------------------------------|-------------|---------|-------------|---------|
| rad33                         | 3.85601e-33 | 1.00000 | 3.85601e-33 | 1.00000 |
| rad25                         | 2.73417e-33 | 1.00000 | 2.73417e-33 | 1.00000 |
| rad27                         | 1.74240e-33 | 1.00000 | 1.74240e-33 | 1.00000 |
| rad19anti                     | 1.76088e-34 | 1.00000 | 1.76088e-34 | 1.00000 |
| rad5                          | 6.34327e-35 | 1.00000 | 6.34327e-35 | 1.00000 |
| rad15                         | 1.28352e-35 | 1.00000 | 1.28352e-35 | 1.00000 |
| rad31                         | 5.12630e-38 | 1.00000 | 5.12630e-38 | 1.00000 |
| rad23                         | 2.36360e-38 | 1.00000 | 2.36360e-38 | 1.00000 |
| rad20                         | 9.24589e-39 | 1.00000 | 9.24589e-39 | 1.00000 |
| rad21                         | 6.80764e-39 | 1.00000 | 6.80764e-39 | 1.00000 |
| rad61                         | 5.03074e-39 | 1.00000 | 5.03074e-39 | 1.00000 |
| rad45                         | 1.67257e-40 | 1.00000 | 1.67257e-40 | 1.00000 |
| rad12                         | 1.39743e-40 | 1.00000 | 1.39743e-40 | 1.00000 |
| rad22                         | 8.02245e-41 | 1.00000 | 8.02245e-41 | 1.00000 |
| rad18                         | 3.86683e-41 | 1.00000 | 3.86683e-41 | 1.00000 |
| rad56                         | 3.37504e-41 | 1.00000 | 3.37504e-41 | 1.00000 |
| rad36                         | 1.02585e-41 | 1.00000 | 1.02585e-41 | 1.00000 |
| rad68syn                      | 2.54460e-43 | 1.00000 | 2.54460e-43 | 1.00000 |
| rad68anti                     | 2.17772e-43 | 1.00000 | 2.17772e-43 | 1.00000 |
| rad19syn                      | 1.37416e-44 | 1.00000 | 1.37416e-44 | 1.00000 |
| Benzene+cycloprop-2-enylidene | 3.08591e-46 | 1.00000 | 3.08591e-46 | 1.00000 |
| rad24                         | 2.79668e-46 | 1.00000 | 2.79668e-46 | 1.00000 |
| rad73                         | 2.07377e-51 | 1.00000 | 2.07377e-51 | 1.00000 |
| rad40syn                      | 2.93617e-52 | 1.00000 | 2.93617e-52 | 1.00000 |
| rad40anti                     | 2.41965e-52 | 1.00000 | 2.41965e-52 | 1.00000 |
| PAH8+H                        | 1.12169e-56 | 1.00000 | 1.12169e-56 | 1.00000 |
| rad71                         | 3.50046e-60 | 1.00000 | 3.50046e-60 | 1.00000 |
| rad8                          | 2.40375e-64 | 1.00000 | 2.40375e-64 | 1.00000 |
| Benzene+cycloprop-1-enylidene | 5.02895e-84 | 1.00000 | 5.02895e-84 | 1.00000 |

0.100000000E-04 Pa, 30.0000000 K

| Rate constant             | True (fraction)        | Effective (fraction)   |
|---------------------------|------------------------|------------------------|
| Total                     | 8.13009e-20 (1.00 )    | 8.13009e-20 (1.00 )    |
| Formation of rad19        | 8.13009e-20 (1.00 )    | 8.13009e-20 (1.00 )    |
| H-abstraction to cyc2enyl | 1.08880e-49 (1.34e-30) | 1.08880e-49 (1.34e-30) |
| H-abstraction to cyclenyl | 7.55172e-75 (9.29e-56) | 7.55172e-75 (9.29e-56) |

| species        | PYtrue      | Cumul    | PYeffective | Cumul    |
|----------------|-------------|----------|-------------|----------|
| Indene+H       | 0.999770    | 0.999770 | 0.999770    | 0.999770 |
| PhCHCCH2+H     | 0.000218740 | 0.999989 | 0.000218740 | 0.999989 |
| PhCCH+CH3      | 3.77922e-06 | 0.999993 | 3.77922e-06 | 0.999993 |
| C2H2+PhCH2     | 2.68543e-06 | 0.999995 | 2.68543e-06 | 0.999995 |
| PhCCCH3+H      | 2.12543e-06 | 0.999997 | 2.12543e-06 | 0.999997 |
| Ph+MeAc        | 1.57151e-06 | 0.999999 | 1.57151e-06 | 0.999999 |
| rad67          | 4.76660e-07 | 0.999999 | 4.76660e-07 | 0.999999 |
| rad35          | 2.11031e-07 | 1.000000 | 2.11031e-07 | 1.000000 |
| Ph+Allene      | 1.36496e-07 | 1.000000 | 1.36496e-07 | 1.000000 |
| PAH7+H         | 1.80487e-08 | 1.000000 | 1.80487e-08 | 1.000000 |
| PhCH2CCH+H     | 1.66211e-08 | 1.000000 | 1.66211e-08 | 1.000000 |
| rad39          | 5.08999e-09 | 1.000000 | 5.08999e-09 | 1.000000 |
| rad37          | 4.68501e-09 | 1.000000 | 4.68501e-09 | 1.000000 |
| rad30          | 3.94538e-09 | 1.000000 | 3.94538e-09 | 1.000000 |
| PAH9+H         | 2.57106e-10 | 1.000000 | 2.57106e-10 | 1.000000 |
| rad38          | 1.08383e-10 | 1.000000 | 1.08383e-10 | 1.000000 |
| rad60syn       | 1.71588e-11 | 1.000000 | 1.71588e-11 | 1.000000 |
| rad60anti      | 8.37912e-12 | 1.000000 | 8.37912e-12 | 1.000000 |
| PAH3+H         | 6.84324e-12 | 1.000000 | 6.84324e-12 | 1.000000 |
| rad46          | 6.51954e-12 | 1.000000 | 6.51954e-12 | 1.000000 |
| PAH10+CH3      | 5.67119e-12 | 1.000000 | 5.67119e-12 | 1.000000 |
| rad59          | 1.41896e-12 | 1.000000 | 1.41896e-12 | 1.000000 |
| PhcycC3H3_A+H  | 4.42422e-13 | 1.000000 | 4.42422e-13 | 1.000000 |
| rad43          | 2.64742e-13 | 1.000000 | 2.64742e-13 | 1.000000 |
| rad54          | 2.10995e-13 | 1.000000 | 2.10995e-13 | 1.000000 |
| rad62          | 5.67499e-14 | 1.000000 | 5.67499e-14 | 1.000000 |
| rad50          | 4.32251e-14 | 1.000000 | 4.32251e-14 | 1.000000 |
| rad70          | 3.24808e-15 | 1.000000 | 3.24808e-15 | 1.000000 |
| rad55          | 1.42497e-15 | 1.000000 | 1.42497e-15 | 1.000000 |
| PAH1+H         | 5.84832e-16 | 1.000000 | 5.84832e-16 | 1.000000 |
| rad52          | 2.74812e-16 | 1.000000 | 2.74812e-16 | 1.000000 |
| rad58          | 7.77929e-17 | 1.000000 | 7.77929e-17 | 1.000000 |
| rad51          | 6.70661e-17 | 1.000000 | 6.70661e-17 | 1.000000 |
| Phenyl+cycC3H4 | 5.25631e-17 | 1.000000 | 0.000000    | 1.000000 |
| rad34          | 3.05727e-17 | 1.000000 | 3.05727e-17 | 1.000000 |
| rad42          | 3.20845e-18 | 1.000000 | 3.20845e-18 | 1.000000 |
| rad41          | 2.96186e-18 | 1.000000 | 2.96186e-18 | 1.000000 |
| rad65          | 1.32246e-18 | 1.000000 | 1.32246e-18 | 1.000000 |
| rad6           | 3.92446e-25 | 1.000000 | 3.92446e-25 | 1.000000 |

|                               |             |          |             |          |
|-------------------------------|-------------|----------|-------------|----------|
| rad28                         | 7.66479e-28 | 1.000000 | 7.66479e-28 | 1.000000 |
| PhcycC3H3_B+H                 | 2.28819e-28 | 1.000000 | 2.28819e-28 | 1.000000 |
| rad26                         | 2.00057e-28 | 1.000000 | 2.00057e-28 | 1.000000 |
| rad2                          | 1.60556e-28 | 1.000000 | 1.60556e-28 | 1.000000 |
| rad7                          | 2.83760e-29 | 1.000000 | 2.83760e-29 | 1.000000 |
| rad1                          | 1.01472e-29 | 1.000000 | 1.01472e-29 | 1.000000 |
| rad53                         | 8.31783e-30 | 1.000000 | 8.31783e-30 | 1.000000 |
| rad10                         | 8.14436e-30 | 1.000000 | 8.14436e-30 | 1.000000 |
| rad11                         | 6.95927e-30 | 1.000000 | 6.95927e-30 | 1.000000 |
| rad47                         | 2.66219e-30 | 1.000000 | 2.66219e-30 | 1.000000 |
| Benzene+cycloprop-2-enylidene | 1.33923e-30 | 1.000000 | 1.33923e-30 | 1.000000 |
| rad3                          | 1.01771e-30 | 1.000000 | 1.01771e-30 | 1.000000 |
| rad4                          | 5.14072e-31 | 1.000000 | 5.14072e-31 | 1.000000 |
| rad13                         | 1.56430e-31 | 1.000000 | 1.56430e-31 | 1.000000 |
| rad64                         | 3.66575e-32 | 1.000000 | 3.66575e-32 | 1.000000 |
| rad9                          | 3.48953e-33 | 1.000000 | 3.48953e-33 | 1.000000 |
| rad14                         | 1.37895e-33 | 1.000000 | 1.37895e-33 | 1.000000 |
| rad25                         | 6.72234e-34 | 1.000000 | 6.72234e-34 | 1.000000 |
| rad33                         | 2.93815e-34 | 1.000000 | 2.93815e-34 | 1.000000 |
| rad27                         | 2.27053e-34 | 1.000000 | 2.27053e-34 | 1.000000 |
| rad19anti                     | 9.43627e-35 | 1.000000 | 9.43627e-35 | 1.000000 |
| rad5                          | 1.49638e-35 | 1.000000 | 1.49638e-35 | 1.000000 |
| rad15                         | 1.50900e-36 | 1.000000 | 1.50900e-36 | 1.000000 |
| rad31                         | 8.62555e-39 | 1.000000 | 8.62555e-39 | 1.000000 |
| rad61                         | 3.99481e-39 | 1.000000 | 3.99481e-39 | 1.000000 |
| rad20                         | 7.37000e-40 | 1.000000 | 7.37000e-40 | 1.000000 |
| rad21                         | 5.44229e-40 | 1.000000 | 5.44229e-40 | 1.000000 |
| rad23                         | 4.58198e-40 | 1.000000 | 4.58198e-40 | 1.000000 |
| rad56                         | 2.62298e-41 | 1.000000 | 2.62298e-41 | 1.000000 |
| rad12                         | 1.65965e-41 | 1.000000 | 1.65965e-41 | 1.000000 |
| rad18                         | 3.26520e-42 | 1.000000 | 3.26520e-42 | 1.000000 |
| rad45                         | 3.10304e-42 | 1.000000 | 3.10304e-42 | 1.000000 |
| rad22                         | 2.94492e-42 | 1.000000 | 2.94492e-42 | 1.000000 |
| rad68syn                      | 1.99385e-43 | 1.000000 | 1.99385e-43 | 1.000000 |
| rad36                         | 1.90287e-43 | 1.000000 | 1.90287e-43 | 1.000000 |
| rad68anti                     | 1.70593e-43 | 1.000000 | 1.70593e-43 | 1.000000 |
| rad19syn                      | 8.38610e-45 | 1.000000 | 8.38610e-45 | 1.000000 |
| rad24                         | 5.39264e-47 | 1.000000 | 5.39264e-47 | 1.000000 |
| rad73                         | 1.67099e-51 | 1.000000 | 1.67099e-51 | 1.000000 |
| rad40syn                      | 2.57311e-52 | 1.000000 | 2.57311e-52 | 1.000000 |
| rad40anti                     | 2.12020e-52 | 1.000000 | 2.12020e-52 | 1.000000 |
| Benzene+cycloprop-1-enylidene | 9.28861e-56 | 1.000000 | 9.28861e-56 | 1.000000 |
| PAH8+H                        | 1.00641e-56 | 1.000000 | 1.00641e-56 | 1.000000 |
| rad71                         | 2.96688e-60 | 1.000000 | 2.96688e-60 | 1.000000 |
| rad8                          | 1.26717e-64 | 1.000000 | 1.26717e-64 | 1.000000 |

0.100000000E-04 Pa, 40.0000000 K

| Rate constant             | True (fraction)        | Effective (fraction)   |
|---------------------------|------------------------|------------------------|
| Total                     | 2.24819e-18 (1.00 )    | 2.24819e-18 (1.00 )    |
| Formation of rad19        | 2.24819e-18 (1.00 )    | 2.24819e-18 (1.00 )    |
| H-abstraction to cyc2enyl | 1.72361e-40 (7.67e-23) | 1.72361e-40 (7.67e-23) |
| H-abstraction to cyclenyl | 2.48792e-59 (1.11e-41) | 2.48792e-59 (1.11e-41) |

| species       | PYtrue      | Cumul    | PYeffective | Cumul    |
|---------------|-------------|----------|-------------|----------|
| Indene+H      | 0.999767    | 0.999767 | 0.999767    | 0.999767 |
| PhCHCCH2+H    | 0.000221747 | 0.999989 | 0.000221747 | 0.999989 |
| PhCCH+CH3     | 3.83604e-06 | 0.999993 | 3.83604e-06 | 0.999993 |
| C2H2+PhCH2    | 2.73340e-06 | 0.999995 | 2.73340e-06 | 0.999995 |
| PhCCCH3+H     | 2.16038e-06 | 0.999997 | 2.16038e-06 | 0.999997 |
| Ph+MeAc       | 1.60299e-06 | 0.999999 | 1.60299e-06 | 0.999999 |
| rad67         | 4.85697e-07 | 1.000000 | 4.85697e-07 | 1.000000 |
| rad35         | 2.14867e-07 | 1.000000 | 2.14867e-07 | 1.000000 |
| Ph+Allene     | 1.40137e-07 | 1.000000 | 1.40137e-07 | 1.000000 |
| PAH7+H        | 1.84619e-08 | 1.000000 | 1.84619e-08 | 1.000000 |
| PhCH2CCH+H    | 1.71354e-08 | 1.000000 | 1.71354e-08 | 1.000000 |
| rad39         | 5.20693e-09 | 1.000000 | 5.20693e-09 | 1.000000 |
| rad37         | 4.79888e-09 | 1.000000 | 4.79888e-09 | 1.000000 |
| rad30         | 4.01853e-09 | 1.000000 | 4.01853e-09 | 1.000000 |
| PAH9+H        | 2.63256e-10 | 1.000000 | 2.63256e-10 | 1.000000 |
| rad38         | 1.11215e-10 | 1.000000 | 1.11215e-10 | 1.000000 |
| rad60syn      | 1.76027e-11 | 1.000000 | 1.76027e-11 | 1.000000 |
| rad60anti     | 8.60136e-12 | 1.000000 | 8.60136e-12 | 1.000000 |
| PAH3+H        | 7.08282e-12 | 1.000000 | 7.08282e-12 | 1.000000 |
| rad46         | 6.70306e-12 | 1.000000 | 6.70306e-12 | 1.000000 |
| PAH10+CH3     | 5.95404e-12 | 1.000000 | 5.95404e-12 | 1.000000 |
| rad59         | 1.46672e-12 | 1.000000 | 1.46672e-12 | 1.000000 |
| PhcycC3H3_A+H | 5.01394e-13 | 1.000000 | 5.01394e-13 | 1.000000 |

|                               |             |          |             |          |
|-------------------------------|-------------|----------|-------------|----------|
| rad43                         | 2.76480e-13 | 1.000000 | 2.76480e-13 | 1.000000 |
| rad54                         | 2.21359e-13 | 1.000000 | 2.21359e-13 | 1.000000 |
| rad62                         | 5.93632e-14 | 1.000000 | 5.93632e-14 | 1.000000 |
| rad50                         | 4.49937e-14 | 1.000000 | 4.49937e-14 | 1.000000 |
| rad70                         | 3.45803e-15 | 1.000000 | 3.45803e-15 | 1.000000 |
| rad55                         | 1.51892e-15 | 1.000000 | 1.51892e-15 | 1.000000 |
| PAH1+H                        | 6.38426e-16 | 1.000000 | 6.38426e-16 | 1.000000 |
| rad52                         | 2.88750e-16 | 1.000000 | 2.88750e-16 | 1.000000 |
| Phenyl+cycC3H4                | 1.15738e-16 | 1.000000 | 0.000000    | 1.000000 |
| rad58                         | 8.33661e-17 | 1.000000 | 8.33661e-17 | 1.000000 |
| rad51                         | 7.12759e-17 | 1.000000 | 7.12759e-17 | 1.000000 |
| rad34                         | 3.35221e-17 | 1.000000 | 3.35221e-17 | 1.000000 |
| rad42                         | 3.55444e-18 | 1.000000 | 3.55444e-18 | 1.000000 |
| rad41                         | 3.38722e-18 | 1.000000 | 3.38722e-18 | 1.000000 |
| rad65                         | 1.41375e-18 | 1.000000 | 1.41375e-18 | 1.000000 |
| Benzene+cycloprop-2-enylidene | 7.66665e-23 | 1.000000 | 7.66665e-23 | 1.000000 |
| PhcycC3H3_B+H                 | 8.31575e-25 | 1.000000 | 8.31575e-25 | 1.000000 |
| rad6                          | 9.63259e-26 | 1.000000 | 9.63259e-26 | 1.000000 |
| rad28                         | 2.30175e-28 | 1.000000 | 2.30175e-28 | 1.000000 |
| rad26                         | 7.57308e-29 | 1.000000 | 7.57308e-29 | 1.000000 |
| rad2                          | 3.84468e-29 | 1.000000 | 3.84468e-29 | 1.000000 |
| rad53                         | 3.64261e-29 | 1.000000 | 3.64261e-29 | 1.000000 |
| rad7                          | 6.96419e-30 | 1.000000 | 6.96419e-30 | 1.000000 |
| rad1                          | 2.43257e-30 | 1.000000 | 2.43257e-30 | 1.000000 |
| rad10                         | 1.95573e-30 | 1.000000 | 1.95573e-30 | 1.000000 |
| rad47                         | 1.79775e-30 | 1.000000 | 1.79775e-30 | 1.000000 |
| rad11                         | 1.70712e-30 | 1.000000 | 1.70712e-30 | 1.000000 |
| rad3                          | 2.44680e-31 | 1.000000 | 2.44680e-31 | 1.000000 |
| rad4                          | 1.23623e-31 | 1.000000 | 1.23623e-31 | 1.000000 |
| rad64                         | 5.80910e-32 | 1.000000 | 5.80910e-32 | 1.000000 |
| rad13                         | 3.84334e-32 | 1.000000 | 3.84334e-32 | 1.000000 |
| rad9                          | 1.16047e-33 | 1.000000 | 1.16047e-33 | 1.000000 |
| rad14                         | 8.23242e-34 | 1.000000 | 8.23242e-34 | 1.000000 |
| rad25                         | 3.91429e-34 | 1.000000 | 3.91429e-34 | 1.000000 |
| rad27                         | 1.02129e-34 | 1.000000 | 1.02129e-34 | 1.000000 |
| rad19anti                     | 7.57619e-35 | 1.000000 | 7.57619e-35 | 1.000000 |
| rad33                         | 7.22178e-35 | 1.000000 | 7.22178e-35 | 1.000000 |
| rad5                          | 6.78085e-36 | 1.000000 | 6.78085e-36 | 1.000000 |
| rad15                         | 5.02146e-37 | 1.000000 | 5.02146e-37 | 1.000000 |
| rad61                         | 6.80096e-39 | 1.000000 | 6.80096e-39 | 1.000000 |
| rad31                         | 5.09192e-39 | 1.000000 | 5.09192e-39 | 1.000000 |
| rad20                         | 1.98153e-40 | 1.000000 | 1.98153e-40 | 1.000000 |
| rad21                         | 1.47155e-40 | 1.000000 | 1.47155e-40 | 1.000000 |
| rad23                         | 5.70991e-41 | 1.000000 | 5.70991e-41 | 1.000000 |
| rad56                         | 4.28948e-41 | 1.000000 | 4.28948e-41 | 1.000000 |
| Benzene+cycloprop-1-enylidene | 1.10663e-41 | 1.000000 | 1.10663e-41 | 1.000000 |
| rad12                         | 5.61498e-42 | 1.000000 | 5.61498e-42 | 1.000000 |
| rad18                         | 9.76167e-43 | 1.000000 | 9.76167e-43 | 1.000000 |
| rad22                         | 5.20647e-43 | 1.000000 | 5.20647e-43 | 1.000000 |
| rad45                         | 3.79150e-43 | 1.000000 | 3.79150e-43 | 1.000000 |
| rad68syn                      | 3.31825e-43 | 1.000000 | 3.31825e-43 | 1.000000 |
| rad68anti                     | 2.83751e-43 | 1.000000 | 2.83751e-43 | 1.000000 |
| rad36                         | 2.32426e-44 | 1.000000 | 2.32426e-44 | 1.000000 |
| rad19syn                      | 8.61360e-45 | 1.000000 | 8.61360e-45 | 1.000000 |
| rad24                         | 3.19683e-47 | 1.000000 | 3.19683e-47 | 1.000000 |
| rad73                         | 2.95566e-51 | 1.000000 | 2.95566e-51 | 1.000000 |
| rad40syn                      | 5.41775e-52 | 1.000000 | 5.41775e-52 | 1.000000 |
| rad40anti                     | 4.46237e-52 | 1.000000 | 4.46237e-52 | 1.000000 |
| PAH8+H                        | 2.23607e-56 | 1.000000 | 2.23607e-56 | 1.000000 |
| rad71                         | 5.87348e-60 | 1.000000 | 5.87348e-60 | 1.000000 |
| rad8                          | 9.75581e-65 | 1.000000 | 9.75581e-65 | 1.000000 |

0.100000000E-04 Pa, 50.000000 K

=====

| Rate constant             | True (fraction)        | Effective (fraction)   |
|---------------------------|------------------------|------------------------|
| Total                     | 1.72707e-17 (1.00 )    | 1.72707e-17 (1.00 )    |
| Formation of rad19        | 1.72707e-17 (1.00 )    | 1.72707e-17 (1.00 )    |
| H-abstraction to cyc2enyl | 5.49905e-35 (3.18e-18) | 5.49905e-35 (3.18e-18) |
| H-abstraction to cyclenyl | 4.93090e-50 (2.86e-33) | 4.93090e-50 (2.86e-33) |

| species    | PYtrue      | Cumul    | PYeffective | Cumul    |
|------------|-------------|----------|-------------|----------|
| Indene+H   | 0.999763    | 0.999763 | 0.999763    | 0.999763 |
| PhCHCCH2+H | 0.000225658 | 0.999989 | 0.000225658 | 0.999989 |
| PhCCH+CH3  | 3.90993e-06 | 0.999993 | 3.90993e-06 | 0.999993 |
| C2H2+PhCH2 | 2.79605e-06 | 0.999995 | 2.79605e-06 | 0.999995 |
| PhCCCH3+H  | 2.20592e-06 | 0.999998 | 2.20592e-06 | 0.999998 |
| Ph+MeAc    | 1.64418e-06 | 0.999999 | 1.64418e-06 | 0.999999 |
| rad67      | 4.97514e-07 | 1.000000 | 4.97514e-07 | 1.000000 |

|                               |             |          |             |          |
|-------------------------------|-------------|----------|-------------|----------|
| rad35                         | 2.19879e-07 | 1.000000 | 2.19879e-07 | 1.000000 |
| Ph+Allene                     | 1.44941e-07 | 1.000000 | 1.44941e-07 | 1.000000 |
| PAH7+H                        | 1.90047e-08 | 1.000000 | 1.90047e-08 | 1.000000 |
| PhCH2CCH+H                    | 1.78172e-08 | 1.000000 | 1.78172e-08 | 1.000000 |
| rad39                         | 5.36053e-09 | 1.000000 | 5.36053e-09 | 1.000000 |
| rad37                         | 4.94868e-09 | 1.000000 | 4.94868e-09 | 1.000000 |
| rad30                         | 4.11419e-09 | 1.000000 | 4.11419e-09 | 1.000000 |
| PAH9+H                        | 2.71351e-10 | 1.000000 | 2.71351e-10 | 1.000000 |
| rad38                         | 1.14953e-10 | 1.000000 | 1.14953e-10 | 1.000000 |
| rad60syn                      | 1.81880e-11 | 1.000000 | 1.81880e-11 | 1.000000 |
| rad60anti                     | 8.89465e-12 | 1.000000 | 8.89465e-12 | 1.000000 |
| PAH3+H                        | 7.40205e-12 | 1.000000 | 7.40205e-12 | 1.000000 |
| rad46                         | 6.94579e-12 | 1.000000 | 6.94579e-12 | 1.000000 |
| PAH10+CH3                     | 6.33664e-12 | 1.000000 | 6.33664e-12 | 1.000000 |
| rad59                         | 1.53025e-12 | 1.000000 | 1.53025e-12 | 1.000000 |
| PhcycC3H3_A+H                 | 5.85937e-13 | 1.000000 | 5.85937e-13 | 1.000000 |
| rad43                         | 2.92251e-13 | 1.000000 | 2.92251e-13 | 1.000000 |
| rad54                         | 2.35369e-13 | 1.000000 | 2.35369e-13 | 1.000000 |
| rad62                         | 6.28787e-14 | 1.000000 | 6.28787e-14 | 1.000000 |
| rad50                         | 4.73669e-14 | 1.000000 | 4.73669e-14 | 1.000000 |
| rad70                         | 3.74668e-15 | 1.000000 | 3.74668e-15 | 1.000000 |
| rad55                         | 1.64771e-15 | 1.000000 | 1.64771e-15 | 1.000000 |
| PAH1+H                        | 7.14014e-16 | 1.000000 | 7.14014e-16 | 1.000000 |
| rad52                         | 3.07651e-16 | 1.000000 | 3.07651e-16 | 1.000000 |
| Phenyl+cycC3H4                | 2.36668e-16 | 1.000000 | 0.000000    | 1.000000 |
| rad58                         | 9.10704e-17 | 1.000000 | 9.10704e-17 | 1.000000 |
| rad51                         | 7.70594e-17 | 1.000000 | 7.70594e-17 | 1.000000 |
| rad34                         | 3.76197e-17 | 1.000000 | 3.76197e-17 | 1.000000 |
| rad42                         | 4.07392e-18 | 1.000000 | 4.07392e-18 | 1.000000 |
| rad41                         | 4.02390e-18 | 1.000000 | 4.02390e-18 | 1.000000 |
| Benzene+cycloprop-2-enylidene | 3.18404e-18 | 1.000000 | 3.18404e-18 | 1.000000 |
| rad65                         | 1.53992e-18 | 1.000000 | 1.53992e-18 | 1.000000 |
| PhcycC3H3_B+H                 | 2.98284e-22 | 1.000000 | 2.98284e-22 | 1.000000 |
| rad6                          | 3.67766e-26 | 1.000000 | 3.67766e-26 | 1.000000 |
| rad53                         | 8.16738e-27 | 1.000000 | 8.16738e-27 | 1.000000 |
| rad28                         | 1.02452e-28 | 1.000000 | 1.02452e-28 | 1.000000 |
| rad26                         | 3.96381e-29 | 1.000000 | 3.96381e-29 | 1.000000 |
| rad2                          | 1.44805e-29 | 1.000000 | 1.44805e-29 | 1.000000 |
| rad64                         | 5.92180e-30 | 1.000000 | 5.92180e-30 | 1.000000 |
| rad7                          | 2.66034e-30 | 1.000000 | 2.66034e-30 | 1.000000 |
| rad47                         | 1.37441e-30 | 1.000000 | 1.37441e-30 | 1.000000 |
| rad1                          | 9.17680e-31 | 1.000000 | 9.17680e-31 | 1.000000 |
| rad10                         | 7.38297e-31 | 1.000000 | 7.38297e-31 | 1.000000 |
| rad11                         | 6.52014e-31 | 1.000000 | 6.52014e-31 | 1.000000 |
| rad3                          | 9.24009e-32 | 1.000000 | 9.24009e-32 | 1.000000 |
| rad4                          | 4.67009e-32 | 1.000000 | 4.67009e-32 | 1.000000 |
| rad13                         | 1.46942e-32 | 1.000000 | 1.46942e-32 | 1.000000 |
| Benzene+cycloprop-1-enylidene | 2.85507e-33 | 1.000000 | 2.85507e-33 | 1.000000 |
| rad14                         | 5.97207e-34 | 1.000000 | 5.97207e-34 | 1.000000 |
| rad9                          | 5.83732e-34 | 1.000000 | 5.83732e-34 | 1.000000 |
| rad25                         | 2.83765e-34 | 1.000000 | 2.83765e-34 | 1.000000 |
| rad19anti                     | 7.56665e-35 | 1.000000 | 7.56665e-35 | 1.000000 |
| rad27                         | 6.66391e-35 | 1.000000 | 6.66391e-35 | 1.000000 |
| rad33                         | 2.76275e-35 | 1.000000 | 2.76275e-35 | 1.000000 |
| rad5                          | 3.94582e-36 | 1.000000 | 3.94582e-36 | 1.000000 |
| rad15                         | 2.52807e-37 | 1.000000 | 2.52807e-37 | 1.000000 |
| rad61                         | 1.95117e-38 | 1.000000 | 1.95117e-38 | 1.000000 |
| rad31                         | 4.38876e-39 | 1.000000 | 4.38876e-39 | 1.000000 |
| rad56                         | 1.18536e-40 | 1.000000 | 1.18536e-40 | 1.000000 |
| rad20                         | 8.65821e-41 | 1.000000 | 8.65821e-41 | 1.000000 |
| rad21                         | 6.48284e-41 | 1.000000 | 6.48284e-41 | 1.000000 |
| rad23                         | 1.45217e-41 | 1.000000 | 1.45217e-41 | 1.000000 |
| rad12                         | 2.89139e-42 | 1.000000 | 2.89139e-42 | 1.000000 |
| rad68syn                      | 9.39959e-43 | 1.000000 | 9.39959e-43 | 1.000000 |
| rad68anti                     | 8.03139e-43 | 1.000000 | 8.03139e-43 | 1.000000 |
| rad18                         | 4.81421e-43 | 1.000000 | 4.81421e-43 | 1.000000 |
| rad22                         | 1.66061e-43 | 1.000000 | 1.66061e-43 | 1.000000 |
| rad45                         | 9.53405e-44 | 1.000000 | 9.53405e-44 | 1.000000 |
| rad19syn                      | 1.15714e-44 | 1.000000 | 1.15714e-44 | 1.000000 |
| rad36                         | 5.84212e-45 | 1.000000 | 5.84212e-45 | 1.000000 |
| rad24                         | 2.57544e-47 | 1.000000 | 2.57544e-47 | 1.000000 |
| rad73                         | 9.15574e-51 | 1.000000 | 9.15574e-51 | 1.000000 |
| rad40syn                      | 2.11586e-51 | 1.000000 | 2.11586e-51 | 1.000000 |
| rad40anti                     | 1.74124e-51 | 1.000000 | 1.74124e-51 | 1.000000 |
| PAH8+H                        | 9.50953e-56 | 1.000000 | 9.50953e-56 | 1.000000 |
| rad71                         | 2.15969e-59 | 1.000000 | 2.15969e-59 | 1.000000 |
| rad8                          | 9.04698e-65 | 1.000000 | 9.04698e-65 | 1.000000 |

0.100000000E-04 Pa, 60.0000000 K

=====

| Rate constant             | True (fraction)        | Effective (fraction)   |
|---------------------------|------------------------|------------------------|
| Total                     | 6.93738e-17 (1.00 )    | 6.93738e-17 (1.00 )    |
| Formation of rad19        | 6.93738e-17 (1.000 )   | 6.93738e-17 (1.000 )   |
| H-abstraction to cyc2enyl | 2.50609e-31 (3.61e-15) | 2.50609e-31 (3.61e-15) |
| H-abstraction to cyc1enyl | 7.62015e-44 (1.10e-27) | 7.62015e-44 (1.10e-27) |

| species                       | PYtrue      | Cumul    | PYeffective | Cumul    |
|-------------------------------|-------------|----------|-------------|----------|
| Indene+H                      | 0.999758    | 0.999758 | 0.999758    | 0.999758 |
| PhCHCCH2+H                    | 0.000230121 | 0.999988 | 0.000230121 | 0.999988 |
| PhCCH+CH3                     | 3.99427e-06 | 0.999992 | 3.99427e-06 | 0.999992 |
| C2H2+PhCH2                    | 2.86797e-06 | 0.999995 | 2.86797e-06 | 0.999995 |
| PhCCCH3+H                     | 2.25806e-06 | 0.999997 | 2.25806e-06 | 0.999997 |
| Ph+MeAc                       | 1.69157e-06 | 0.999999 | 1.69157e-06 | 0.999999 |
| rad67                         | 5.11098e-07 | 0.999999 | 5.11098e-07 | 0.999999 |
| rad35                         | 2.25634e-07 | 1.000000 | 2.25634e-07 | 1.000000 |
| Ph+Allene                     | 1.50529e-07 | 1.000000 | 1.50529e-07 | 1.000000 |
| PAH7+H                        | 1.96326e-08 | 1.000000 | 1.96326e-08 | 1.000000 |
| PhCH2CCH+H                    | 1.86151e-08 | 1.000000 | 1.86151e-08 | 1.000000 |
| rad39                         | 5.53816e-09 | 1.000000 | 5.53816e-09 | 1.000000 |
| rad37                         | 5.12226e-09 | 1.000000 | 5.12226e-09 | 1.000000 |
| rad30                         | 4.22418e-09 | 1.000000 | 4.22418e-09 | 1.000000 |
| PAH9+H                        | 2.80738e-10 | 1.000000 | 2.80738e-10 | 1.000000 |
| rad38                         | 1.19305e-10 | 1.000000 | 1.19305e-10 | 1.000000 |
| rad60syn                      | 1.88685e-11 | 1.000000 | 1.88685e-11 | 1.000000 |
| rad60anti                     | 9.23591e-12 | 1.000000 | 9.23591e-12 | 1.000000 |
| PAH3+H                        | 7.77807e-12 | 1.000000 | 7.77807e-12 | 1.000000 |
| rad46                         | 7.22904e-12 | 1.000000 | 7.22904e-12 | 1.000000 |
| PAH10+CH3                     | 6.79612e-12 | 1.000000 | 6.79612e-12 | 1.000000 |
| rad59                         | 1.60493e-12 | 1.000000 | 1.60493e-12 | 1.000000 |
| PhcycC3H3_A+H                 | 6.95715e-13 | 1.000000 | 6.95715e-13 | 1.000000 |
| rad43                         | 3.11028e-13 | 1.000000 | 3.11028e-13 | 1.000000 |
| rad54                         | 2.52183e-13 | 1.000000 | 2.52183e-13 | 1.000000 |
| rad62                         | 6.70701e-14 | 1.000000 | 6.70701e-14 | 1.000000 |
| rad50                         | 5.01883e-14 | 1.000000 | 5.01883e-14 | 1.000000 |
| rad70                         | 4.10047e-15 | 1.000000 | 4.10047e-15 | 1.000000 |
| Benzene+cycloprop-2-enylidene | 3.61245e-15 | 1.000000 | 3.61245e-15 | 1.000000 |
| rad55                         | 1.80520e-15 | 1.000000 | 1.80520e-15 | 1.000000 |
| PAH1+H                        | 8.09558e-16 | 1.000000 | 8.09558e-16 | 1.000000 |
| Phenyl+cycC3H4                | 4.45921e-16 | 1.000000 | 0.000000    | 1.000000 |
| rad52                         | 3.30430e-16 | 1.000000 | 3.30430e-16 | 1.000000 |
| rad58                         | 1.00588e-16 | 1.000000 | 1.00588e-16 | 1.000000 |
| rad51                         | 8.41459e-17 | 1.000000 | 8.41459e-17 | 1.000000 |
| rad34                         | 4.27620e-17 | 1.000000 | 4.27620e-17 | 1.000000 |
| rad41                         | 4.87029e-18 | 1.000000 | 4.87029e-18 | 1.000000 |
| rad42                         | 4.76389e-18 | 1.000000 | 4.76389e-18 | 1.000000 |
| rad65                         | 1.69574e-18 | 1.000000 | 1.69574e-18 | 1.000000 |
| PhcycC3H3_B+H                 | 1.47017e-20 | 1.000000 | 1.47017e-20 | 1.000000 |
| rad53                         | 3.73209e-25 | 1.000000 | 3.73209e-25 | 1.000000 |
| rad6                          | 1.77489e-26 | 1.000000 | 1.77489e-26 | 1.000000 |
| Benzene+cycloprop-1-enylidene | 1.09842e-27 | 1.000000 | 1.09842e-27 | 1.000000 |
| rad64                         | 9.22159e-28 | 1.000000 | 9.22159e-28 | 1.000000 |
| rad28                         | 5.59300e-29 | 1.000000 | 5.59300e-29 | 1.000000 |
| rad26                         | 2.44734e-29 | 1.000000 | 2.44734e-29 | 1.000000 |
| rad2                          | 6.94008e-30 | 1.000000 | 6.94008e-30 | 1.000000 |
| rad7                          | 1.28506e-30 | 1.000000 | 1.28506e-30 | 1.000000 |
| rad47                         | 1.12623e-30 | 1.000000 | 1.12623e-30 | 1.000000 |
| rad1                          | 4.40703e-31 | 1.000000 | 4.40703e-31 | 1.000000 |
| rad10                         | 3.54610e-31 | 1.000000 | 3.54610e-31 | 1.000000 |
| rad11                         | 3.14950e-31 | 1.000000 | 3.14950e-31 | 1.000000 |
| rad3                          | 4.43696e-32 | 1.000000 | 4.43696e-32 | 1.000000 |
| rad4                          | 2.24348e-32 | 1.000000 | 2.24348e-32 | 1.000000 |
| rad13                         | 7.10380e-33 | 1.000000 | 7.10380e-33 | 1.000000 |
| rad14                         | 4.75354e-34 | 1.000000 | 4.75354e-34 | 1.000000 |
| rad9                          | 3.69364e-34 | 1.000000 | 3.69364e-34 | 1.000000 |
| rad25                         | 2.27491e-34 | 1.000000 | 2.27491e-34 | 1.000000 |
| rad19anti                     | 8.80010e-35 | 1.000000 | 8.80010e-35 | 1.000000 |
| rad27                         | 5.09159e-35 | 1.000000 | 5.09159e-35 | 1.000000 |
| rad61                         | 4.85957e-35 | 1.000000 | 4.85957e-35 | 1.000000 |
| rad33                         | 1.33663e-35 | 1.000000 | 1.33663e-35 | 1.000000 |
| rad5                          | 2.62717e-36 | 1.000000 | 2.62717e-36 | 1.000000 |
| rad15                         | 1.60135e-37 | 1.000000 | 1.60135e-37 | 1.000000 |
| rad31                         | 4.55820e-39 | 1.000000 | 4.55820e-39 | 1.000000 |
| rad56                         | 6.11624e-40 | 1.000000 | 6.11624e-40 | 1.000000 |
| rad20                         | 4.97629e-41 | 1.000000 | 4.97629e-41 | 1.000000 |
| rad21                         | 3.76426e-41 | 1.000000 | 3.76426e-41 | 1.000000 |
| rad23                         | 5.44638e-42 | 1.000000 | 5.44638e-42 | 1.000000 |
| rad68syn                      | 4.98200e-42 | 1.000000 | 4.98200e-42 | 1.000000 |
| rad68anti                     | 4.25291e-42 | 1.000000 | 4.25291e-42 | 1.000000 |

|           |             |          |             |          |
|-----------|-------------|----------|-------------|----------|
| rad12     | 1.88476e-42 | 1.000000 | 1.88476e-42 | 1.000000 |
| rad18     | 3.09081e-43 | 1.000000 | 3.09081e-43 | 1.000000 |
| rad22     | 7.23492e-44 | 1.000000 | 7.23492e-44 | 1.000000 |
| rad45     | 3.54955e-44 | 1.000000 | 3.54955e-44 | 1.000000 |
| rad19syn  | 1.80508e-44 | 1.000000 | 1.80508e-44 | 1.000000 |
| rad36     | 2.17416e-45 | 1.000000 | 2.17416e-45 | 1.000000 |
| rad24     | 2.39178e-47 | 1.000000 | 2.39178e-47 | 1.000000 |
| rad73     | 5.37947e-50 | 1.000000 | 5.37947e-50 | 1.000000 |
| rad40syn  | 1.54578e-50 | 1.000000 | 1.54578e-50 | 1.000000 |
| rad40anti | 1.27011e-50 | 1.000000 | 1.27011e-50 | 1.000000 |
| PAH8+H    | 7.80419e-55 | 1.000000 | 7.80419e-55 | 1.000000 |
| rad71     | 1.56473e-58 | 1.000000 | 1.56473e-58 | 1.000000 |
| rad8      | 9.43560e-65 | 1.000000 | 9.43560e-65 | 1.000000 |

0.100000000E-04 Pa, 70.0000000 K

| Rate constant             | True (fraction)        | Effective (fraction)   |  |  |
|---------------------------|------------------------|------------------------|--|--|
| Total                     | 1.91520e-16 (1.00 )    | 1.91520e-16 (1.00 )    |  |  |
| Formation of rad19        | 1.91520e-16 (1.000 )   | 1.91520e-16 (1.000 )   |  |  |
| H-abstraction to cyc2enyl | 1.01125e-28 (5.28e-13) | 1.01125e-28 (5.28e-13) |  |  |
| H-abstraction to cyclenyl | 1.97822e-39 (1.03e-23) | 1.97822e-39 (1.03e-23) |  |  |

  

| species                       | PYtrue      | Cumul    | PYeffective | Cumul    |
|-------------------------------|-------------|----------|-------------|----------|
| Indene+H                      | 0.999753    | 0.999753 | 0.999753    | 0.999753 |
| PhCHCCH2+H                    | 0.000235006 | 0.999988 | 0.000235006 | 0.999988 |
| PhCCH+CH3                     | 4.08659e-06 | 0.999992 | 4.08659e-06 | 0.999992 |
| C2H2+PhCH2                    | 2.94722e-06 | 0.999995 | 2.94722e-06 | 0.999995 |
| PhCCCH3+H                     | 2.31532e-06 | 0.999997 | 2.31532e-06 | 0.999997 |
| Ph+MeAc                       | 1.74394e-06 | 0.999999 | 1.74394e-06 | 0.999999 |
| rad67                         | 5.26090e-07 | 1.000000 | 5.26090e-07 | 1.000000 |
| rad35                         | 2.31978e-07 | 1.000000 | 2.31978e-07 | 1.000000 |
| Ph+Allene                     | 1.56780e-07 | 1.000000 | 1.56780e-07 | 1.000000 |
| PAH7+H                        | 2.03304e-08 | 1.000000 | 2.03304e-08 | 1.000000 |
| PhCH2CCH+H                    | 1.95140e-08 | 1.000000 | 1.95140e-08 | 1.000000 |
| rad39                         | 5.73557e-09 | 1.000000 | 5.73557e-09 | 1.000000 |
| rad37                         | 5.31557e-09 | 1.000000 | 5.31557e-09 | 1.000000 |
| rad30                         | 4.34562e-09 | 1.000000 | 4.34562e-09 | 1.000000 |
| PAH9+H                        | 2.91201e-10 | 1.000000 | 2.91201e-10 | 1.000000 |
| rad38                         | 1.24178e-10 | 1.000000 | 1.24178e-10 | 1.000000 |
| rad60syn                      | 1.96290e-11 | 1.000000 | 1.96290e-11 | 1.000000 |
| rad60anti                     | 9.61776e-12 | 1.000000 | 9.61776e-12 | 1.000000 |
| PAH3+H                        | 8.20480e-12 | 1.000000 | 8.20480e-12 | 1.000000 |
| rad46                         | 7.54705e-12 | 1.000000 | 7.54705e-12 | 1.000000 |
| PAH10+CH3                     | 7.32915e-12 | 1.000000 | 7.32915e-12 | 1.000000 |
| rad59                         | 1.68948e-12 | 1.000000 | 1.68948e-12 | 1.000000 |
| PhcycC3H3_A+H                 | 8.34925e-13 | 1.000000 | 8.34925e-13 | 1.000000 |
| Benzene+cycloprop-2-enylidene | 5.28015e-13 | 1.000000 | 5.28015e-13 | 1.000000 |
| rad43                         | 3.32592e-13 | 1.000000 | 3.32592e-13 | 1.000000 |
| rad54                         | 2.71674e-13 | 1.000000 | 2.71674e-13 | 1.000000 |
| rad62                         | 7.18914e-14 | 1.000000 | 7.18914e-14 | 1.000000 |
| rad50                         | 5.34244e-14 | 1.000000 | 5.34244e-14 | 1.000000 |
| rad70                         | 4.52030e-15 | 1.000000 | 4.52030e-15 | 1.000000 |
| rad55                         | 1.99184e-15 | 1.000000 | 1.99184e-15 | 1.000000 |
| PAH1+H                        | 9.26891e-16 | 1.000000 | 9.26891e-16 | 1.000000 |
| Phenyl+cycC3H4                | 7.87809e-16 | 1.000000 | 0.000000    | 1.000000 |
| rad52                         | 3.56970e-16 | 1.000000 | 3.56970e-16 | 1.000000 |
| rad58                         | 1.11992e-16 | 1.000000 | 1.11992e-16 | 1.000000 |
| rad51                         | 9.25585e-17 | 1.000000 | 9.25585e-17 | 1.000000 |
| rad34                         | 4.90697e-17 | 1.000000 | 4.90697e-17 | 1.000000 |
| rad41                         | 5.95425e-18 | 1.000000 | 5.95425e-18 | 1.000000 |
| rad42                         | 5.64284e-18 | 1.000000 | 5.64284e-18 | 1.000000 |
| rad65                         | 1.88238e-18 | 1.000000 | 1.88238e-18 | 1.000000 |
| PhcycC3H3_B+H                 | 2.38334e-19 | 1.000000 | 2.38334e-19 | 1.000000 |
| Benzene+cycloprop-1-enylidene | 1.03290e-23 | 1.000000 | 1.03290e-23 | 1.000000 |
| rad53                         | 5.56966e-24 | 1.000000 | 5.56966e-24 | 1.000000 |
| rad64                         | 3.39579e-26 | 1.000000 | 3.39579e-26 | 1.000000 |
| rad6                          | 9.90683e-27 | 1.000000 | 9.90683e-27 | 1.000000 |
| rad28                         | 3.45819e-29 | 1.000000 | 3.45819e-29 | 1.000000 |
| rad26                         | 1.67045e-29 | 1.000000 | 1.67045e-29 | 1.000000 |
| rad2                          | 3.86833e-30 | 1.000000 | 3.86833e-30 | 1.000000 |
| rad47                         | 9.65495e-31 | 1.000000 | 9.65495e-31 | 1.000000 |
| rad7                          | 7.18073e-31 | 1.000000 | 7.18073e-31 | 1.000000 |
| rad1                          | 2.46219e-31 | 1.000000 | 2.46219e-31 | 1.000000 |
| rad10                         | 1.98065e-31 | 1.000000 | 1.98065e-31 | 1.000000 |
| rad11                         | 1.76005e-31 | 1.000000 | 1.76005e-31 | 1.000000 |
| rad61                         | 5.68434e-32 | 1.000000 | 5.68434e-32 | 1.000000 |
| rad3                          | 2.47529e-32 | 1.000000 | 2.47529e-32 | 1.000000 |
| rad4                          | 1.25225e-32 | 1.000000 | 1.25225e-32 | 1.000000 |



|           |             |         |             |         |
|-----------|-------------|---------|-------------|---------|
| rad13     | 3.97285e-33 | 1.00000 | 3.97285e-33 | 1.00000 |
| rad14     | 4.00299e-34 | 1.00000 | 4.00299e-34 | 1.00000 |
| rad9      | 2.70915e-34 | 1.00000 | 2.70915e-34 | 1.00000 |
| rad25     | 1.93608e-34 | 1.00000 | 1.93608e-34 | 1.00000 |
| rad19anti | 1.14996e-34 | 1.00000 | 1.14996e-34 | 1.00000 |
| rad27     | 4.23336e-35 | 1.00000 | 4.23336e-35 | 1.00000 |
| rad56     | 2.32796e-35 | 1.00000 | 2.32796e-35 | 1.00000 |
| rad33     | 7.48181e-36 | 1.00000 | 7.48181e-36 | 1.00000 |
| rad5      | 1.90311e-36 | 1.00000 | 1.90311e-36 | 1.00000 |
| rad15     | 1.17593e-37 | 1.00000 | 1.17593e-37 | 1.00000 |
| rad31     | 5.33720e-39 | 1.00000 | 5.33720e-39 | 1.00000 |
| rad68syn  | 8.35758e-41 | 1.00000 | 8.35758e-41 | 1.00000 |
| rad68anti | 7.12906e-41 | 1.00000 | 7.12906e-41 | 1.00000 |
| rad20     | 3.42383e-41 | 1.00000 | 3.42383e-41 | 1.00000 |
| rad21     | 2.61996e-41 | 1.00000 | 2.61996e-41 | 1.00000 |
| rad23     | 2.63753e-42 | 1.00000 | 2.63753e-42 | 1.00000 |
| rad12     | 1.43356e-42 | 1.00000 | 1.43356e-42 | 1.00000 |
| rad18     | 2.31874e-43 | 1.00000 | 2.31874e-43 | 1.00000 |
| rad22     | 3.82404e-44 | 1.00000 | 3.82404e-44 | 1.00000 |
| rad19syn  | 3.07655e-44 | 1.00000 | 3.07655e-44 | 1.00000 |
| rad45     | 1.71037e-44 | 1.00000 | 1.71037e-44 | 1.00000 |
| rad36     | 1.04730e-45 | 1.00000 | 1.04730e-45 | 1.00000 |
| rad24     | 2.41999e-47 | 1.00000 | 2.41999e-47 | 1.00000 |
| rad73     | 9.69803e-49 | 1.00000 | 9.69803e-49 | 1.00000 |
| rad40syn  | 2.86244e-49 | 1.00000 | 2.86244e-49 | 1.00000 |
| rad40anti | 2.34567e-49 | 1.00000 | 2.34567e-49 | 1.00000 |
| PAH8+H    | 1.67110e-53 | 1.00000 | 1.67110e-53 | 1.00000 |
| rad71     | 3.35710e-57 | 1.00000 | 3.35710e-57 | 1.00000 |
| rad8      | 1.06794e-64 | 1.00000 | 1.06794e-64 | 1.00000 |

0.100000000E-04 Pa, 80.0000000 K

| Rate constant             | True (fraction)        | Effective (fraction)   |
|---------------------------|------------------------|------------------------|
| Total                     | 4.17084e-16 (1.00 )    | 4.17084e-16 (1.00 )    |
| Formation of rad19        | 4.17084e-16 (1.000 )   | 4.17084e-16 (1.000 )   |
| H-abstraction to cyc2enyl | 8.98751e-27 (2.15e-11) | 8.98751e-27 (2.15e-11) |
| H-abstraction to cyclenyl | 4.00120e-36 (9.59e-21) | 4.00120e-36 (9.59e-21) |

| species                       | PYtrue      | Cumul    | PYeffective | Cumul    |
|-------------------------------|-------------|----------|-------------|----------|
| Indene+H                      | 0.999747    | 0.999747 | 0.999747    | 0.999747 |
| PhCHCCH2+H                    | 0.000240278 | 0.999987 | 0.000240278 | 0.999987 |
| PhCCH+CH3                     | 4.18618e-06 | 0.999991 | 4.18618e-06 | 0.999991 |
| C2H2+PhCH2                    | 3.03334e-06 | 0.999994 | 3.03334e-06 | 0.999994 |
| PhCCCH3+H                     | 2.37733e-06 | 0.999997 | 2.37733e-06 | 0.999997 |
| Ph+MeAc                       | 1.80101e-06 | 0.999999 | 1.80101e-06 | 0.999999 |
| rad67                         | 5.42408e-07 | 0.999999 | 5.42408e-07 | 0.999999 |
| rad35                         | 2.38874e-07 | 0.999999 | 2.38874e-07 | 0.999999 |
| Ph+Allene                     | 1.63685e-07 | 1.000000 | 1.63685e-07 | 1.000000 |
| PAH7+H                        | 2.10958e-08 | 1.000000 | 2.10958e-08 | 1.000000 |
| PhCH2CCH+H                    | 2.05145e-08 | 1.000000 | 2.05145e-08 | 1.000000 |
| rad39                         | 5.95204e-09 | 1.000000 | 5.95204e-09 | 1.000000 |
| rad37                         | 5.52806e-09 | 1.000000 | 5.52806e-09 | 1.000000 |
| rad30                         | 4.47786e-09 | 1.000000 | 4.47786e-09 | 1.000000 |
| PAH9+H                        | 3.02715e-10 | 1.000000 | 3.02715e-10 | 1.000000 |
| rad38                         | 1.29566e-10 | 1.000000 | 1.29566e-10 | 1.000000 |
| Benzene+cycloprop-2-enylidene | 2.15484e-11 | 1.000000 | 2.15484e-11 | 1.000000 |
| rad60syn                      | 2.04684e-11 | 1.000000 | 2.04684e-11 | 1.000000 |
| rad60anti                     | 1.00397e-11 | 1.000000 | 1.00397e-11 | 1.000000 |
| PAH3+H                        | 8.68357e-12 | 1.000000 | 8.68357e-12 | 1.000000 |
| PAH10+CH3                     | 7.94154e-12 | 1.000000 | 7.94154e-12 | 1.000000 |
| rad46                         | 7.89974e-12 | 1.000000 | 7.89974e-12 | 1.000000 |
| rad59                         | 1.78409e-12 | 1.000000 | 1.78409e-12 | 1.000000 |
| PhcycC3H3_A+H                 | 1.01061e-12 | 1.000000 | 1.01061e-12 | 1.000000 |
| rad43                         | 3.57097e-13 | 1.000000 | 3.57097e-13 | 1.000000 |
| rad54                         | 2.94052e-13 | 1.000000 | 2.94052e-13 | 1.000000 |
| rad62                         | 7.73782e-14 | 1.000000 | 7.73782e-14 | 1.000000 |
| rad50                         | 5.70977e-14 | 1.000000 | 5.70977e-14 | 1.000000 |
| rad70                         | 5.01443e-15 | 1.000000 | 5.01443e-15 | 1.000000 |
| rad55                         | 2.21134e-15 | 1.000000 | 2.21134e-15 | 1.000000 |
| Phenyl+cycC3H4                | 1.32430e-15 | 1.000000 | 0.000000    | 1.000000 |
| PAH1+H                        | 1.07020e-15 | 1.000000 | 1.07020e-15 | 1.000000 |
| rad52                         | 3.87614e-16 | 1.000000 | 3.87614e-16 | 1.000000 |
| rad58                         | 1.25561e-16 | 1.000000 | 1.25561e-16 | 1.000000 |
| rad51                         | 1.02471e-16 | 1.000000 | 1.02471e-16 | 1.000000 |
| rad34                         | 5.67852e-17 | 1.000000 | 5.67852e-17 | 1.000000 |
| rad41                         | 7.33019e-18 | 1.000000 | 7.33019e-18 | 1.000000 |
| rad42                         | 6.74819e-18 | 1.000000 | 6.74819e-18 | 1.000000 |
| rad65                         | 2.10439e-18 | 1.000000 | 2.10439e-18 | 1.000000 |

|                               |             |          |             |          |
|-------------------------------|-------------|----------|-------------|----------|
| PhcycC3H3_B+H                 | 1.96138e-18 | 1.000000 | 1.96138e-18 | 1.000000 |
| Benzene+cycloprop-1-enylidene | 9.59328e-21 | 1.000000 | 9.59328e-21 | 1.000000 |
| rad53                         | 4.18958e-23 | 1.000000 | 4.18958e-23 | 1.000000 |
| rad64                         | 5.09113e-25 | 1.000000 | 5.09113e-25 | 1.000000 |
| rad6                          | 6.10452e-27 | 1.000000 | 6.10452e-27 | 1.000000 |
| rad28                         | 2.32411e-29 | 1.000000 | 2.32411e-29 | 1.000000 |
| rad26                         | 1.21938e-29 | 1.000000 | 1.21938e-29 | 1.000000 |
| rad61                         | 8.41956e-30 | 1.000000 | 8.41956e-30 | 1.000000 |
| rad2                          | 2.39484e-30 | 1.000000 | 2.39484e-30 | 1.000000 |
| rad47                         | 8.54875e-31 | 1.000000 | 8.54875e-31 | 1.000000 |
| rad7                          | 4.43030e-31 | 1.000000 | 4.43030e-31 | 1.000000 |
| rad1                          | 1.52834e-31 | 1.000000 | 1.52834e-31 | 1.000000 |
| rad10                         | 1.22841e-31 | 1.000000 | 1.22841e-31 | 1.000000 |
| rad11                         | 1.08606e-31 | 1.000000 | 1.08606e-31 | 1.000000 |
| rad3                          | 1.53237e-32 | 1.000000 | 1.53237e-32 | 1.000000 |
| rad56                         | 1.31870e-32 | 1.000000 | 1.31870e-32 | 1.000000 |
| rad4                          | 7.75698e-33 | 1.000000 | 7.75698e-33 | 1.000000 |
| rad13                         | 2.45330e-33 | 1.000000 | 2.45330e-33 | 1.000000 |
| rad14                         | 3.50297e-34 | 1.000000 | 3.50297e-34 | 1.000000 |
| rad9                          | 2.20447e-34 | 1.000000 | 2.20447e-34 | 1.000000 |
| rad68syn                      | 1.87140e-34 | 1.000000 | 1.87140e-34 | 1.000000 |
| rad25                         | 1.71535e-34 | 1.000000 | 1.71535e-34 | 1.000000 |
| rad19anti                     | 1.65194e-34 | 1.000000 | 1.65194e-34 | 1.000000 |
| rad68anti                     | 1.57604e-34 | 1.000000 | 1.57604e-34 | 1.000000 |
| rad27                         | 3.70979e-35 | 1.000000 | 3.70979e-35 | 1.000000 |
| rad33                         | 4.62478e-36 | 1.000000 | 4.62478e-36 | 1.000000 |
| rad5                          | 1.46014e-36 | 1.000000 | 1.46014e-36 | 1.000000 |
| rad15                         | 9.58113e-38 | 1.000000 | 9.58113e-38 | 1.000000 |
| rad31                         | 6.82825e-39 | 1.000000 | 6.82825e-39 | 1.000000 |
| rad20                         | 2.67558e-41 | 1.000000 | 2.67558e-41 | 1.000000 |
| rad21                         | 2.07244e-41 | 1.000000 | 2.07244e-41 | 1.000000 |
| rad23                         | 1.55284e-42 | 1.000000 | 1.55284e-42 | 1.000000 |
| rad12                         | 1.21833e-42 | 1.000000 | 1.21833e-42 | 1.000000 |
| rad18                         | 1.91967e-43 | 1.000000 | 1.91967e-43 | 1.000000 |
| rad19syn                      | 5.56519e-44 | 1.000000 | 5.56519e-44 | 1.000000 |
| rad22                         | 2.30524e-44 | 1.000000 | 2.30524e-44 | 1.000000 |
| rad45                         | 1.00348e-44 | 1.000000 | 1.00348e-44 | 1.000000 |
| rad36                         | 6.14337e-46 | 1.000000 | 6.14337e-46 | 1.000000 |
| rad73                         | 1.03571e-46 | 1.000000 | 1.03571e-46 | 1.000000 |
| rad24                         | 2.59805e-47 | 1.000000 | 2.59805e-47 | 1.000000 |
| rad40syn                      | 2.29078e-47 | 1.000000 | 2.29078e-47 | 1.000000 |
| rad40anti                     | 1.86934e-47 | 1.000000 | 1.86934e-47 | 1.000000 |
| PAH8+H                        | 1.56154e-51 | 1.000000 | 1.56154e-51 | 1.000000 |
| rad71                         | 3.88557e-55 | 1.000000 | 3.88557e-55 | 1.000000 |
| rad8                          | 1.28436e-64 | 1.000000 | 1.28436e-64 | 1.000000 |

0.100000000E-04 Pa, 90.0000000 K

| Rate constant             | True (fraction)        | Effective (fraction)   |
|---------------------------|------------------------|------------------------|
| Total                     | 7.74016e-16 (1.00 )    | 7.74016e-16 (1.00 )    |
| Formation of rad19        | 7.74016e-16 (1.000 )   | 7.74016e-16 (1.000 )   |
| H-abstraction to cyc2enyl | 2.91736e-25 (3.77e-10) | 2.91736e-25 (3.77e-10) |
| H-abstraction to cyclenyl | 1.47814e-33 (1.91e-18) | 1.47814e-33 (1.91e-18) |

| species                       | PYtrue      | Cumul    | PYeffective | Cumul    |
|-------------------------------|-------------|----------|-------------|----------|
| Indene+H                      | 0.999741    | 0.999741 | 0.999741    | 0.999741 |
| PhCHCCH2+H                    | 0.000245933 | 0.999987 | 0.000245933 | 0.999987 |
| PhCCH+CH3                     | 4.29301e-06 | 0.999991 | 4.29301e-06 | 0.999991 |
| C2H2+PhCH2                    | 3.12644e-06 | 0.999994 | 3.12644e-06 | 0.999994 |
| PhCCCH3+H                     | 2.44411e-06 | 0.999997 | 2.44411e-06 | 0.999997 |
| Ph+MeAc                       | 1.86289e-06 | 0.999999 | 1.86289e-06 | 0.999999 |
| rad67                         | 5.60078e-07 | 0.999999 | 5.60078e-07 | 0.999999 |
| rad35                         | 2.46332e-07 | 0.999999 | 2.46332e-07 | 0.999999 |
| Ph+Allene                     | 1.71279e-07 | 1.000000 | 1.71279e-07 | 1.000000 |
| PAH7+H                        | 2.19314e-08 | 1.000000 | 2.19314e-08 | 1.000000 |
| PhCH2CCH+H                    | 2.16238e-08 | 1.000000 | 2.16238e-08 | 1.000000 |
| rad39                         | 6.18831e-09 | 1.000000 | 6.18831e-09 | 1.000000 |
| rad37                         | 5.76057e-09 | 1.000000 | 5.76057e-09 | 1.000000 |
| rad30                         | 4.62113e-09 | 1.000000 | 4.62113e-09 | 1.000000 |
| Benzene+cycloprop-2-enylidene | 3.76912e-10 | 1.000000 | 3.76912e-10 | 1.000000 |
| PAH9+H                        | 3.15328e-10 | 1.000000 | 3.15328e-10 | 1.000000 |
| rad38                         | 1.35501e-10 | 1.000000 | 1.35501e-10 | 1.000000 |
| rad60syn                      | 2.13909e-11 | 1.000000 | 2.13909e-11 | 1.000000 |
| rad60anti                     | 1.05039e-11 | 1.000000 | 1.05039e-11 | 1.000000 |
| PAH3+H                        | 9.21901e-12 | 1.000000 | 9.21901e-12 | 1.000000 |
| PAH10+CH3                     | 8.64383e-12 | 1.000000 | 8.64383e-12 | 1.000000 |
| rad46                         | 8.28936e-12 | 1.000000 | 8.28936e-12 | 1.000000 |
| rad59                         | 1.88961e-12 | 1.000000 | 1.88961e-12 | 1.000000 |

|                               |             |          |             |          |
|-------------------------------|-------------|----------|-------------|----------|
| PhcycC3H3_A+H                 | 1.23243e-12 | 1.000000 | 1.23243e-12 | 1.000000 |
| rad43                         | 3.84868e-13 | 1.000000 | 3.84868e-13 | 1.000000 |
| rad54                         | 3.19696e-13 | 1.000000 | 3.19696e-13 | 1.000000 |
| rad62                         | 8.36056e-14 | 1.000000 | 8.36056e-14 | 1.000000 |
| rad50                         | 6.12574e-14 | 1.000000 | 6.12574e-14 | 1.000000 |
| rad70                         | 5.59578e-15 | 1.000000 | 5.59578e-15 | 1.000000 |
| rad55                         | 2.46954e-15 | 1.000000 | 2.46954e-15 | 1.000000 |
| Phenyl+cycC3H4                | 2.14284e-15 | 1.000000 | 0.000000    | 1.000000 |
| PAH1+H                        | 1.24556e-15 | 1.000000 | 1.24556e-15 | 1.000000 |
| rad52                         | 4.22954e-16 | 1.000000 | 4.22954e-16 | 1.000000 |
| rad58                         | 1.41714e-16 | 1.000000 | 1.41714e-16 | 1.000000 |
| rad51                         | 1.14154e-16 | 1.000000 | 1.14154e-16 | 1.000000 |
| rad34                         | 6.62488e-17 | 1.000000 | 6.62488e-17 | 1.000000 |
| PhcycC3H3_B+H                 | 1.04002e-17 | 1.000000 | 1.04002e-17 | 1.000000 |
| rad41                         | 9.07987e-18 | 1.000000 | 9.07987e-18 | 1.000000 |
| rad42                         | 8.13584e-18 | 1.000000 | 8.13584e-18 | 1.000000 |
| rad65                         | 2.36868e-18 | 1.000000 | 2.36868e-18 | 1.000000 |
| Benzene+cycloprop-1-enylidene | 1.90970e-18 | 1.000000 | 1.90970e-18 | 1.000000 |
| rad53                         | 2.02295e-22 | 1.000000 | 2.02295e-22 | 1.000000 |
| rad64                         | 4.24438e-24 | 1.000000 | 4.24438e-24 | 1.000000 |
| rad6                          | 4.04109e-27 | 1.000000 | 4.04109e-27 | 1.000000 |
| rad61                         | 4.05748e-28 | 1.000000 | 4.05748e-28 | 1.000000 |
| rad28                         | 1.65763e-29 | 1.000000 | 1.65763e-29 | 1.000000 |
| rad26                         | 9.33940e-30 | 1.000000 | 9.33940e-30 | 1.000000 |
| rad2                          | 1.60380e-30 | 1.000000 | 1.60380e-30 | 1.000000 |
| rad56                         | 1.28601e-30 | 1.000000 | 1.28601e-30 | 1.000000 |
| rad47                         | 7.75937e-31 | 1.000000 | 7.75937e-31 | 1.000000 |
| rad7                          | 2.93684e-31 | 1.000000 | 2.93684e-31 | 1.000000 |
| rad1                          | 1.02651e-31 | 1.000000 | 1.02651e-31 | 1.000000 |
| rad10                         | 8.24276e-32 | 1.000000 | 8.24276e-32 | 1.000000 |
| rad11                         | 7.20091e-32 | 1.000000 | 7.20091e-32 | 1.000000 |
| rad68syn                      | 2.85403e-32 | 1.000000 | 2.85403e-32 | 1.000000 |
| rad68anti                     | 2.36879e-32 | 1.000000 | 2.36879e-32 | 1.000000 |
| rad3                          | 1.02521e-32 | 1.000000 | 1.02521e-32 | 1.000000 |
| rad4                          | 5.19329e-33 | 1.000000 | 5.19329e-33 | 1.000000 |
| rad13                         | 1.62779e-33 | 1.000000 | 1.62779e-33 | 1.000000 |
| rad14                         | 3.15288e-34 | 1.000000 | 3.15288e-34 | 1.000000 |
| rad19anti                     | 2.57298e-34 | 1.000000 | 2.57298e-34 | 1.000000 |
| rad9                          | 1.93890e-34 | 1.000000 | 1.93890e-34 | 1.000000 |
| rad25                         | 1.56491e-34 | 1.000000 | 1.56491e-34 | 1.000000 |
| rad27                         | 3.37076e-35 | 1.000000 | 3.37076e-35 | 1.000000 |
| rad33                         | 3.07207e-36 | 1.000000 | 3.07207e-36 | 1.000000 |
| rad5                          | 1.16772e-36 | 1.000000 | 1.16772e-36 | 1.000000 |
| rad15                         | 8.43857e-38 | 1.000000 | 8.43857e-38 | 1.000000 |
| rad31                         | 9.38250e-39 | 1.000000 | 9.38250e-39 | 1.000000 |
| rad73                         | 1.45331e-39 | 1.000000 | 1.45331e-39 | 1.000000 |
| rad20                         | 2.29694e-41 | 1.000000 | 2.29694e-41 | 1.000000 |
| rad21                         | 1.80113e-41 | 1.000000 | 1.80113e-41 | 1.000000 |
| rad12                         | 1.12789e-42 | 1.000000 | 1.12789e-42 | 1.000000 |
| rad23                         | 1.08544e-42 | 1.000000 | 1.08544e-42 | 1.000000 |
| rad18                         | 1.69771e-43 | 1.000000 | 1.69771e-43 | 1.000000 |
| rad19syn                      | 1.05530e-43 | 1.000000 | 1.05530e-43 | 1.000000 |
| rad22                         | 1.52888e-44 | 1.000000 | 1.52888e-44 | 1.000000 |
| rad45                         | 6.99942e-45 | 1.000000 | 6.99942e-45 | 1.000000 |
| rad40syn                      | 5.28602e-45 | 1.000000 | 5.28602e-45 | 1.000000 |
| rad40anti                     | 4.29341e-45 | 1.000000 | 4.29341e-45 | 1.000000 |
| rad36                         | 4.28491e-46 | 1.000000 | 4.28491e-46 | 1.000000 |
| rad24                         | 2.91686e-47 | 1.000000 | 2.91686e-47 | 1.000000 |
| PAH8+H                        | 4.16085e-49 | 1.000000 | 4.16085e-49 | 1.000000 |
| rad71                         | 1.29283e-52 | 1.000000 | 1.29283e-52 | 1.000000 |
| rad8                          | 1.61986e-64 | 1.000000 | 1.61986e-64 | 1.000000 |

0.100000000E-04 Pa, 100.000000 K

| Rate constant             | True (fraction)        | Effective (fraction)   |
|---------------------------|------------------------|------------------------|
| Total                     | 1.28255e-15 (1.00 )    | 1.28255e-15 (1.00 )    |
| Formation of rad19        | 1.28255e-15 (1.000 )   | 1.28255e-15 (1.000 )   |
| H-abstraction to cyc2enyl | 4.68359e-24 (3.65e-09) | 4.68359e-24 (3.65e-09) |
| H-abstraction to cyclenyl | 1.66242e-31 (1.30e-16) | 1.66242e-31 (1.30e-16) |

| species    | PYtrue      | Cumul    | PYeffective | Cumul    |
|------------|-------------|----------|-------------|----------|
| Indene+H   | 0.999735    | 0.999735 | 0.999735    | 0.999735 |
| PhCHCCH2+H | 0.000251988 | 0.999987 | 0.000251988 | 0.999987 |
| PhCCH+CH3  | 4.40736e-06 | 0.999991 | 4.40736e-06 | 0.999991 |
| C2H2+PhCH2 | 3.22690e-06 | 0.999995 | 3.22690e-06 | 0.999995 |
| PhCCCH3+H  | 2.51589e-06 | 0.999997 | 2.51589e-06 | 0.999997 |
| Ph+MeAc    | 1.92987e-06 | 0.999999 | 1.92987e-06 | 0.999999 |
| rad67      | 5.79181e-07 | 1.000000 | 5.79181e-07 | 1.000000 |

|                               |             |          |             |          |
|-------------------------------|-------------|----------|-------------|----------|
| rad35                         | 2.54382e-07 | 1.000000 | 2.54382e-07 | 1.000000 |
| Ph+Allene                     | 1.79626e-07 | 1.00000  | 1.79626e-07 | 1.00000  |
| PhCH2CCH+H                    | 2.28535e-08 | 1.00000  | 2.28535e-08 | 1.00000  |
| PAH7+H                        | 2.28426e-08 | 1.00000  | 2.28426e-08 | 1.00000  |
| rad39                         | 6.44588e-09 | 1.00000  | 6.44588e-09 | 1.00000  |
| rad37                         | 6.01471e-09 | 1.00000  | 6.01471e-09 | 1.00000  |
| rad30                         | 4.77610e-09 | 1.00000  | 4.77610e-09 | 1.00000  |
| Benzene+cycloprop-2-enylidene | 3.65179e-09 | 1.00000  | 3.65179e-09 | 1.00000  |
| PAH9+H                        | 3.29133e-10 | 1.00000  | 3.29133e-10 | 1.00000  |
| rad38                         | 1.42032e-10 | 1.00000  | 1.42032e-10 | 1.00000  |
| rad60syn                      | 2.24039e-11 | 1.00000  | 2.24039e-11 | 1.00000  |
| rad60anti                     | 1.10144e-11 | 1.00000  | 1.10144e-11 | 1.00000  |
| PAH3+H                        | 9.81801e-12 | 1.00000  | 9.81801e-12 | 1.00000  |
| PAH10+CH3                     | 9.45058e-12 | 1.00000  | 9.45058e-12 | 1.00000  |
| rad46                         | 8.71960e-12 | 1.00000  | 8.71960e-12 | 1.00000  |
| rad59                         | 2.00730e-12 | 1.00000  | 2.00730e-12 | 1.00000  |
| PhcycC3H3_A+H                 | 1.51348e-12 | 1.00000  | 1.51348e-12 | 1.00000  |
| rad43                         | 4.16367e-13 | 1.00000  | 4.16367e-13 | 1.00000  |
| rad54                         | 3.49134e-13 | 1.00000  | 3.49134e-13 | 1.00000  |
| rad62                         | 9.06789e-14 | 1.00000  | 9.06789e-14 | 1.00000  |
| rad50                         | 6.59738e-14 | 1.00000  | 6.59738e-14 | 1.00000  |
| rad70                         | 6.28186e-15 | 1.00000  | 6.28186e-15 | 1.00000  |
| Phenyl+cycC3H4                | 3.36905e-15 | 1.00000  | 0.00000     | 1.00000  |
| rad55                         | 2.77426e-15 | 1.00000  | 2.77426e-15 | 1.00000  |
| PAH1+H                        | 1.46128e-15 | 1.00000  | 1.46128e-15 | 1.00000  |
| rad52                         | 4.63810e-16 | 1.00000  | 4.63810e-16 | 1.00000  |
| rad58                         | 1.61019e-16 | 1.00000  | 1.61019e-16 | 1.00000  |
| Benzene+cycloprop-1-enylidene | 1.29619e-16 | 1.00000  | 1.29619e-16 | 1.00000  |
| rad51                         | 1.27975e-16 | 1.00000  | 1.27975e-16 | 1.00000  |
| rad34                         | 7.79205e-17 | 1.00000  | 7.79205e-17 | 1.00000  |
| PhcycC3H3_B+H                 | 4.09123e-17 | 1.00000  | 4.09123e-17 | 1.00000  |
| rad41                         | 1.13185e-17 | 1.00000  | 1.13185e-17 | 1.00000  |
| rad42                         | 9.88343e-18 | 1.00000  | 9.88343e-18 | 1.00000  |
| rad65                         | 2.68463e-18 | 1.00000  | 2.68463e-18 | 1.00000  |
| rad53                         | 7.24657e-22 | 1.00000  | 7.24657e-22 | 1.00000  |
| rad64                         | 2.36967e-23 | 1.00000  | 2.36967e-23 | 1.00000  |
| rad61                         | 9.04334e-27 | 1.00000  | 9.04334e-27 | 1.00000  |
| rad6                          | 2.82533e-27 | 1.00000  | 2.82533e-27 | 1.00000  |
| rad56                         | 5.01134e-29 | 1.00000  | 5.01134e-29 | 1.00000  |
| rad28                         | 1.23604e-29 | 1.00000  | 1.23604e-29 | 1.00000  |
| rad26                         | 7.41693e-30 | 1.00000  | 7.41693e-30 | 1.00000  |
| rad68syn                      | 1.54810e-30 | 1.00000  | 1.54810e-30 | 1.00000  |
| rad68anti                     | 1.27120e-30 | 1.00000  | 1.27120e-30 | 1.00000  |
| rad2                          | 1.14604e-30 | 1.00000  | 1.14604e-30 | 1.00000  |
| rad47                         | 7.18621e-31 | 1.00000  | 7.18621e-31 | 1.00000  |
| rad7                          | 2.05633e-31 | 1.00000  | 2.05633e-31 | 1.00000  |
| rad1                          | 7.35892e-32 | 1.00000  | 7.35892e-32 | 1.00000  |
| rad10                         | 5.89999e-32 | 1.00000  | 5.89999e-32 | 1.00000  |
| rad11                         | 5.04315e-32 | 1.00000  | 5.04315e-32 | 1.00000  |
| rad3                          | 7.30921e-33 | 1.00000  | 7.30921e-33 | 1.00000  |
| rad4                          | 3.70545e-33 | 1.00000  | 3.70545e-33 | 1.00000  |
| rad13                         | 1.14086e-33 | 1.00000  | 1.14086e-33 | 1.00000  |
| rad19anti                     | 4.30716e-34 | 1.00000  | 4.30716e-34 | 1.00000  |
| rad14                         | 2.90007e-34 | 1.00000  | 2.90007e-34 | 1.00000  |
| rad9                          | 1.81304e-34 | 1.00000  | 1.81304e-34 | 1.00000  |
| rad25                         | 1.46016e-34 | 1.00000  | 1.46016e-34 | 1.00000  |
| rad27                         | 3.14590e-35 | 1.00000  | 3.14590e-35 | 1.00000  |
| rad33                         | 2.15584e-36 | 1.00000  | 2.15584e-36 | 1.00000  |
| rad40syn                      | 1.99128e-36 | 1.00000  | 1.99128e-36 | 1.00000  |
| rad40anti                     | 1.51571e-36 | 1.00000  | 1.51571e-36 | 1.00000  |
| rad5                          | 9.63532e-37 | 1.00000  | 9.63532e-37 | 1.00000  |
| rad73                         | 7.52969e-37 | 1.00000  | 7.52969e-37 | 1.00000  |
| rad15                         | 7.90231e-38 | 1.00000  | 7.90231e-38 | 1.00000  |
| rad31                         | 1.37065e-38 | 1.00000  | 1.37065e-38 | 1.00000  |
| rad20                         | 2.11769e-41 | 1.00000  | 2.11769e-41 | 1.00000  |
| rad21                         | 1.68072e-41 | 1.00000  | 1.68072e-41 | 1.00000  |
| rad12                         | 1.11953e-42 | 1.00000  | 1.11953e-42 | 1.00000  |
| rad23                         | 8.97374e-43 | 1.00000  | 8.97374e-43 | 1.00000  |
| rad19syn                      | 2.08907e-43 | 1.00000  | 2.08907e-43 | 1.00000  |
| rad18                         | 1.57286e-43 | 1.00000  | 1.57286e-43 | 1.00000  |
| rad22                         | 1.09072e-44 | 1.00000  | 1.09072e-44 | 1.00000  |
| rad45                         | 5.78090e-45 | 1.00000  | 5.78090e-45 | 1.00000  |
| rad36                         | 3.53939e-46 | 1.00000  | 3.53939e-46 | 1.00000  |
| PAH8+H                        | 2.22240e-46 | 1.00000  | 2.22240e-46 | 1.00000  |
| rad24                         | 3.39495e-47 | 1.00000  | 3.39495e-47 | 1.00000  |
| rad71                         | 8.99615e-50 | 1.00000  | 8.99615e-50 | 1.00000  |
| rad8                          | 2.12437e-64 | 1.00000  | 2.12437e-64 | 1.00000  |

0.100000000E-04 Pa, 110.00000 K

=====

| Rate constant             | True (fraction)        | Effective (fraction)   |
|---------------------------|------------------------|------------------------|
| Total                     | 1.95524e-15 (1.00 )    | 1.95524e-15 (1.00 )    |
| Formation of rad19        | 1.95524e-15 (1.000 )   | 1.95524e-15 (1.000 )   |
| H-abstraction to cyc2enyl | 4.50936e-23 (2.31e-08) | 4.50936e-23 (2.31e-08) |
| H-abstraction to cyc1enyl | 7.87782e-30 (4.03e-15) | 7.87782e-30 (4.03e-15) |

| species                       | PYtrue      | Cumul    | PYeffective | Cumul    |
|-------------------------------|-------------|----------|-------------|----------|
| Indene+H                      | 0.999728    | 0.999728 | 0.999728    | 0.999728 |
| PhCHCCH2+H                    | 0.000258470 | 0.999986 | 0.000258470 | 0.999986 |
| PhCCH+CH3                     | 4.52973e-06 | 0.999991 | 4.52973e-06 | 0.999991 |
| C2H2+PhCH2                    | 3.33534e-06 | 0.999994 | 3.33534e-06 | 0.999994 |
| PhCCCH3+H                     | 2.59304e-06 | 0.999997 | 2.59304e-06 | 0.999997 |
| Ph+MeAc                       | 2.00241e-06 | 0.999999 | 2.00241e-06 | 0.999999 |
| rad67                         | 5.99841e-07 | 1.000000 | 5.99841e-07 | 1.000000 |
| rad35                         | 2.63077e-07 | 1.000000 | 2.63077e-07 | 1.000000 |
| Ph+Allene                     | 1.88812e-07 | 1.000000 | 1.88812e-07 | 1.000000 |
| PhCH2CCH+H                    | 2.42192e-08 | 1.000000 | 2.42192e-08 | 1.000000 |
| PAH7+H                        | 2.38370e-08 | 1.000000 | 2.38370e-08 | 1.000000 |
| Benzene+cycloprop-2-enylidene | 2.30629e-08 | 1.000000 | 2.30629e-08 | 1.000000 |
| rad39                         | 6.72690e-09 | 1.000000 | 6.72690e-09 | 1.000000 |
| rad37                         | 6.29278e-09 | 1.000000 | 6.29278e-09 | 1.000000 |
| rad30                         | 4.94382e-09 | 1.000000 | 4.94382e-09 | 1.000000 |
| PAH9+H                        | 3.44261e-10 | 1.000000 | 3.44261e-10 | 1.000000 |
| rad38                         | 1.49234e-10 | 1.000000 | 1.49234e-10 | 1.000000 |
| rad60syn                      | 2.35177e-11 | 1.000000 | 2.35177e-11 | 1.000000 |
| rad60anti                     | 1.15765e-11 | 1.000000 | 1.15765e-11 | 1.000000 |
| PAH3+H                        | 1.04898e-11 | 1.000000 | 1.04898e-11 | 1.000000 |
| PAH10+CH3                     | 1.03809e-11 | 1.000000 | 1.03809e-11 | 1.000000 |
| rad46                         | 9.19551e-12 | 1.000000 | 9.19551e-12 | 1.000000 |
| rad59                         | 2.13885e-12 | 1.000000 | 2.13885e-12 | 1.000000 |
| PhcycC3H3_A+H                 | 1.87147e-12 | 1.000000 | 1.87147e-12 | 1.000000 |
| rad43                         | 4.52199e-13 | 1.000000 | 4.52199e-13 | 1.000000 |
| rad54                         | 3.83057e-13 | 1.000000 | 3.83057e-13 | 1.000000 |
| rad62                         | 9.87357e-14 | 1.000000 | 9.87357e-14 | 1.000000 |
| rad50                         | 7.13394e-14 | 1.000000 | 7.13394e-14 | 1.000000 |
| rad70                         | 7.09587e-15 | 1.000000 | 7.09587e-15 | 1.000000 |
| Phenyl+cycC3H4                | 5.18630e-15 | 1.000000 | 0.000000    | 1.000000 |
| Benzene+cycloprop-1-enylidene | 4.02908e-15 | 1.000000 | 4.02908e-15 | 1.000000 |
| rad55                         | 3.13588e-15 | 1.000000 | 3.13588e-15 | 1.000000 |
| PAH1+H                        | 1.72855e-15 | 1.000000 | 1.72855e-15 | 1.000000 |
| rad52                         | 5.11260e-16 | 1.000000 | 5.11260e-16 | 1.000000 |
| rad58                         | 1.84231e-16 | 1.000000 | 1.84231e-16 | 1.000000 |
| rad51                         | 1.44427e-16 | 1.000000 | 1.44427e-16 | 1.000000 |
| PhcycC3H3_B+H                 | 1.30407e-16 | 1.000000 | 1.30407e-16 | 1.000000 |
| rad34                         | 9.24225e-17 | 1.000000 | 9.24225e-17 | 1.000000 |
| rad41                         | 1.42061e-17 | 1.000000 | 1.42061e-17 | 1.000000 |
| rad42                         | 1.20969e-17 | 1.000000 | 1.20969e-17 | 1.000000 |
| rad65                         | 3.06483e-18 | 1.000000 | 3.06483e-18 | 1.000000 |
| rad53                         | 2.11092e-21 | 1.000000 | 2.11092e-21 | 1.000000 |
| rad64                         | 9.96381e-23 | 1.000000 | 9.96381e-23 | 1.000000 |
| rad61                         | 1.15972e-25 | 1.000000 | 1.15972e-25 | 1.000000 |
| rad6                          | 2.06315e-27 | 1.000000 | 2.06315e-27 | 1.000000 |
| rad56                         | 1.00969e-27 | 1.000000 | 1.00969e-27 | 1.000000 |
| rad68syn                      | 4.04802e-29 | 1.000000 | 4.04802e-29 | 1.000000 |
| rad68anti                     | 3.29761e-29 | 1.000000 | 3.29761e-29 | 1.000000 |
| rad28                         | 9.54078e-30 | 1.000000 | 9.54078e-30 | 1.000000 |
| rad26                         | 6.06024e-30 | 1.000000 | 6.06024e-30 | 1.000000 |
| rad2                          | 8.67239e-31 | 1.000000 | 8.67239e-31 | 1.000000 |
| rad47                         | 6.77046e-31 | 1.000000 | 6.77046e-31 | 1.000000 |
| rad7                          | 1.50395e-31 | 1.000000 | 1.50395e-31 | 1.000000 |
| rad1                          | 5.58840e-32 | 1.000000 | 5.58840e-32 | 1.000000 |
| rad10                         | 4.47381e-32 | 1.000000 | 4.47381e-32 | 1.000000 |
| rad11                         | 3.68941e-32 | 1.000000 | 3.68941e-32 | 1.000000 |
| rad3                          | 5.51124e-33 | 1.000000 | 5.51124e-33 | 1.000000 |
| rad4                          | 2.79640e-33 | 1.000000 | 2.79640e-33 | 1.000000 |
| rad13                         | 8.35249e-34 | 1.000000 | 8.35249e-34 | 1.000000 |
| rad19anti                     | 7.70506e-34 | 1.000000 | 7.70506e-34 | 1.000000 |
| rad40syn                      | 3.23201e-34 | 1.000000 | 3.23201e-34 | 1.000000 |
| rad14                         | 2.71449e-34 | 1.000000 | 2.71449e-34 | 1.000000 |
| rad40anti                     | 2.54378e-34 | 1.000000 | 2.54378e-34 | 1.000000 |
| rad9                          | 1.78265e-34 | 1.000000 | 1.78265e-34 | 1.000000 |
| rad25                         | 1.38723e-34 | 1.000000 | 1.38723e-34 | 1.000000 |
| rad73                         | 5.48405e-35 | 1.000000 | 5.48405e-35 | 1.000000 |
| rad27                         | 2.99829e-35 | 1.000000 | 2.99829e-35 | 1.000000 |
| rad33                         | 1.58059e-36 | 1.000000 | 1.58059e-36 | 1.000000 |
| rad5                          | 8.14652e-37 | 1.000000 | 8.14652e-37 | 1.000000 |
| rad15                         | 7.78174e-38 | 1.000000 | 7.78174e-38 | 1.000000 |
| rad31                         | 2.11556e-38 | 1.000000 | 2.11556e-38 | 1.000000 |

|          |             |         |             |         |
|----------|-------------|---------|-------------|---------|
| rad20    | 2.06345e-41 | 1.00000 | 2.06345e-41 | 1.00000 |
| rad21    | 1.65695e-41 | 1.00000 | 1.65695e-41 | 1.00000 |
| rad12    | 1.17925e-42 | 1.00000 | 1.17925e-42 | 1.00000 |
| rad23    | 8.79799e-43 | 1.00000 | 8.79799e-43 | 1.00000 |
| rad19syn | 4.31564e-43 | 1.00000 | 4.31564e-43 | 1.00000 |
| rad18    | 1.50801e-43 | 1.00000 | 1.50801e-43 | 1.00000 |
| PAH8+H   | 1.08851e-43 | 1.00000 | 1.08851e-43 | 1.00000 |
| rad22    | 8.24831e-45 | 1.00000 | 8.24831e-45 | 1.00000 |
| rad45    | 5.66714e-45 | 1.00000 | 5.66714e-45 | 1.00000 |
| rad36    | 3.47078e-46 | 1.00000 | 3.47078e-46 | 1.00000 |
| rad71    | 5.50110e-47 | 1.00000 | 5.50110e-47 | 1.00000 |
| rad24    | 4.07367e-47 | 1.00000 | 4.07367e-47 | 1.00000 |
| rad8     | 2.88052e-64 | 1.00000 | 2.88052e-64 | 1.00000 |

0.100000000E-04 Pa, 120.000000 K

| Rate constant             | True (fraction) |            | Effective (fraction) |            |
|---------------------------|-----------------|------------|----------------------|------------|
| Total                     | 2.79817e-15     | (1.00 )    | 2.79817e-15          | (1.00 )    |
| Formation of rad19        | 2.79817e-15     | (1.000 )   | 2.79817e-15          | (1.000 )   |
| H-abstraction to cyc2enyl | 2.96039e-22     | (1.06e-07) | 2.96039e-22          | (1.06e-07) |
| H-abstraction to cyclenyl | 1.95323e-28     | (6.98e-14) | 1.95323e-28          | (6.98e-14) |

  

| species                       | PYtrue      | Cumul    | PYeffective | Cumul    |
|-------------------------------|-------------|----------|-------------|----------|
| Indene+H                      | 0.999721    | 0.999721 | 0.999721    | 0.999721 |
| PhCHCCH2+H                    | 0.000265418 | 0.999986 | 0.000265418 | 0.999986 |
| PhCCH+CH3                     | 4.66082e-06 | 0.999991 | 4.66082e-06 | 0.999991 |
| C2H2+PhCH2                    | 3.45258e-06 | 0.999994 | 3.45258e-06 | 0.999994 |
| PhCCCH3+H                     | 2.67609e-06 | 0.999997 | 2.67609e-06 | 0.999997 |
| Ph+MeAc                       | 2.08110e-06 | 0.999999 | 2.08110e-06 | 0.999999 |
| rad67                         | 6.22225e-07 | 1.000000 | 6.22225e-07 | 1.000000 |
| rad35                         | 2.72481e-07 | 1.000000 | 2.72481e-07 | 1.000000 |
| Ph+Allene                     | 1.98950e-07 | 1.000000 | 1.98950e-07 | 1.000000 |
| Benzene+cycloprop-2-enylidene | 1.05797e-07 | 1.000000 | 1.05797e-07 | 1.000000 |
| PhCH2CCH+H                    | 2.57406e-08 | 1.000000 | 2.57406e-08 | 1.000000 |
| PAH7+H                        | 2.49247e-08 | 1.000000 | 2.49247e-08 | 1.000000 |
| rad39                         | 7.03418e-09 | 1.000000 | 7.03418e-09 | 1.000000 |
| rad37                         | 6.59774e-09 | 1.000000 | 6.59774e-09 | 1.000000 |
| rad30                         | 5.12566e-09 | 1.000000 | 5.12566e-09 | 1.000000 |
| PAH9+H                        | 3.60881e-10 | 1.000000 | 3.60881e-10 | 1.000000 |
| rad38                         | 1.57196e-10 | 1.000000 | 1.57196e-10 | 1.000000 |
| rad60syn                      | 2.47458e-11 | 1.000000 | 2.47458e-11 | 1.000000 |
| rad60anti                     | 1.21972e-11 | 1.000000 | 1.21972e-11 | 1.000000 |
| PAH10+CH3                     | 1.14592e-11 | 1.000000 | 1.14592e-11 | 1.000000 |
| PAH3+H                        | 1.12460e-11 | 1.000000 | 1.12460e-11 | 1.000000 |
| rad46                         | 9.72360e-12 | 1.000000 | 9.72360e-12 | 1.000000 |
| PhcycC3H3_A+H                 | 2.33055e-12 | 1.000000 | 2.33055e-12 | 1.000000 |
| rad59                         | 2.28645e-12 | 1.000000 | 2.28645e-12 | 1.000000 |
| rad43                         | 4.93136e-13 | 1.000000 | 4.93136e-13 | 1.000000 |
| rad54                         | 4.22353e-13 | 1.000000 | 4.22353e-13 | 1.000000 |
| rad62                         | 1.07951e-13 | 1.000000 | 1.07951e-13 | 1.000000 |
| rad50                         | 7.74733e-14 | 1.000000 | 7.74733e-14 | 1.000000 |
| Benzene+cycloprop-1-enylidene | 6.98038e-14 | 1.000000 | 6.98038e-14 | 1.000000 |
| rad70                         | 8.06827e-15 | 1.000000 | 8.06827e-15 | 1.000000 |
| Phenyl+cycC3H4                | 7.86468e-15 | 1.000000 | 0.000000    | 1.000000 |
| rad55                         | 3.56795e-15 | 1.000000 | 3.56795e-15 | 1.000000 |
| PAH1+H                        | 2.06259e-15 | 1.000000 | 2.06259e-15 | 1.000000 |
| rad52                         | 5.66711e-16 | 1.000000 | 5.66711e-16 | 1.000000 |
| PhcycC3H3_B+H                 | 3.56809e-16 | 1.000000 | 3.56809e-16 | 1.000000 |
| rad58                         | 2.12355e-16 | 1.000000 | 2.12355e-16 | 1.000000 |
| rad51                         | 1.64160e-16 | 1.000000 | 1.64160e-16 | 1.000000 |
| rad34                         | 1.10599e-16 | 1.000000 | 1.10599e-16 | 1.000000 |
| rad41                         | 1.79639e-17 | 1.000000 | 1.79639e-17 | 1.000000 |
| rad42                         | 1.49203e-17 | 1.000000 | 1.49203e-17 | 1.000000 |
| rad65                         | 3.52610e-18 | 1.000000 | 3.52610e-18 | 1.000000 |
| rad53                         | 5.31324e-21 | 1.000000 | 5.31324e-21 | 1.000000 |
| rad64                         | 3.40975e-22 | 1.000000 | 3.40975e-22 | 1.000000 |
| rad61                         | 9.89208e-25 | 1.000000 | 9.89208e-25 | 1.000000 |
| rad56                         | 1.24744e-26 | 1.000000 | 1.24744e-26 | 1.000000 |
| rad6                          | 1.56210e-27 | 1.000000 | 1.56210e-27 | 1.000000 |
| rad68syn                      | 6.17070e-28 | 1.000000 | 6.17070e-28 | 1.000000 |
| rad68anti                     | 4.99494e-28 | 1.000000 | 4.99494e-28 | 1.000000 |
| rad28                         | 7.57133e-30 | 1.000000 | 7.57133e-30 | 1.000000 |
| rad26                         | 5.06828e-30 | 1.000000 | 5.06828e-30 | 1.000000 |
| rad2                          | 6.95276e-31 | 1.000000 | 6.95276e-31 | 1.000000 |
| rad47                         | 6.47617e-31 | 1.000000 | 6.47617e-31 | 1.000000 |
| rad7                          | 1.14058e-31 | 1.000000 | 1.14058e-31 | 1.000000 |
| rad1                          | 4.49762e-32 | 1.000000 | 4.49762e-32 | 1.000000 |
| rad10                         | 3.59230e-32 | 1.000000 | 3.59230e-32 | 1.000000 |

|           |             |         |             |         |
|-----------|-------------|---------|-------------|---------|
| rad11     | 2.79881e-32 | 1.00000 | 2.79881e-32 | 1.00000 |
| rad40syn  | 1.64573e-32 | 1.00000 | 1.64573e-32 | 1.00000 |
| rad40anti | 1.29414e-32 | 1.00000 | 1.29414e-32 | 1.00000 |
| rad3      | 4.39015e-33 | 1.00000 | 4.39015e-33 | 1.00000 |
| rad4      | 2.22972e-33 | 1.00000 | 2.22972e-33 | 1.00000 |
| rad73     | 1.92333e-33 | 1.00000 | 1.92333e-33 | 1.00000 |
| rad19anti | 1.46734e-33 | 1.00000 | 1.46734e-33 | 1.00000 |
| rad13     | 6.34118e-34 | 1.00000 | 6.34118e-34 | 1.00000 |
| rad14     | 2.57784e-34 | 1.00000 | 2.57784e-34 | 1.00000 |
| rad9      | 1.82897e-34 | 1.00000 | 1.82897e-34 | 1.00000 |
| rad25     | 1.33781e-34 | 1.00000 | 1.33781e-34 | 1.00000 |
| PAH8+H    | 4.13571e-35 | 1.00000 | 4.13571e-35 | 1.00000 |
| rad27     | 2.90704e-35 | 1.00000 | 2.90704e-35 | 1.00000 |
| rad33     | 1.20190e-36 | 1.00000 | 1.20190e-36 | 1.00000 |
| rad5      | 7.02315e-37 | 1.00000 | 7.02315e-37 | 1.00000 |
| rad15     | 7.99668e-38 | 1.00000 | 7.99668e-38 | 1.00000 |
| rad31     | 3.43663e-38 | 1.00000 | 3.43663e-38 | 1.00000 |
| rad71     | 1.32207e-38 | 1.00000 | 1.32207e-38 | 1.00000 |
| rad20     | 2.10053e-41 | 1.00000 | 2.10053e-41 | 1.00000 |
| rad21     | 1.70593e-41 | 1.00000 | 1.70593e-41 | 1.00000 |
| rad12     | 1.30909e-42 | 1.00000 | 1.30909e-42 | 1.00000 |
| rad23     | 1.01969e-42 | 1.00000 | 1.01969e-42 | 1.00000 |
| rad19syn  | 9.31466e-43 | 1.00000 | 9.31466e-43 | 1.00000 |
| rad18     | 1.48442e-43 | 1.00000 | 1.48442e-43 | 1.00000 |
| rad45     | 6.57098e-45 | 1.00000 | 6.57098e-45 | 1.00000 |
| rad22     | 6.54961e-45 | 1.00000 | 6.54961e-45 | 1.00000 |
| rad36     | 4.02631e-46 | 1.00000 | 4.02631e-46 | 1.00000 |
| rad24     | 5.02076e-47 | 1.00000 | 5.02076e-47 | 1.00000 |
| rad8      | 4.02251e-64 | 1.00000 | 4.02251e-64 | 1.00000 |

0.100000000E-04 Pa, 130.000000 K

| Rate constant                 | True (fraction)        | Effective (fraction)   |             |          |
|-------------------------------|------------------------|------------------------|-------------|----------|
| Total                         | 3.81236e-15 (1.00 )    | 3.81236e-15 (1.00 )    |             |          |
| Formation of rad19            | 3.81236e-15 (1.000 )   | 3.81236e-15 (1.000 )   |             |          |
| H-abstraction to cyc2enyl     | 1.44825e-21 (3.80e-07) | 1.44825e-21 (3.80e-07) |             |          |
| H-abstraction to cyclenyl     | 2.94348e-27 (7.72e-13) | 2.94348e-27 (7.72e-13) |             |          |
| species                       | PYtrue                 | Cumul                  | PYeffective | Cumul    |
| Indene+H                      | 0.999713               | 0.999713               | 0.999713    | 0.999713 |
| PhCHCCH2+H                    | 0.000272881            | 0.999986               | 0.000272881 | 0.999986 |
| PhCCH+CH3                     | 4.80154e-06            | 0.999990               | 4.80154e-06 | 0.999990 |
| C2H2+PhCH2                    | 3.57965e-06            | 0.999994               | 3.57965e-06 | 0.999994 |
| PhCCCH3+H                     | 2.76568e-06            | 0.999997               | 2.76568e-06 | 0.999997 |
| Ph+MeAc                       | 2.16669e-06            | 0.999999               | 2.16669e-06 | 0.999999 |
| rad67                         | 6.46538e-07            | 0.999999               | 6.46538e-07 | 0.999999 |
| Benzene+cycloprop-2-enylidene | 3.79882e-07            | 1.000000               | 3.79882e-07 | 1.000000 |
| rad35                         | 2.82679e-07            | 1.00000                | 2.82679e-07 | 1.00000  |
| Ph+Allene                     | 2.10176e-07            | 1.00000                | 2.10176e-07 | 1.00000  |
| PhCH2CCH+H                    | 2.74425e-08            | 1.00000                | 2.74425e-08 | 1.00000  |
| PAH7+H                        | 2.61181e-08            | 1.00000                | 2.61181e-08 | 1.00000  |
| rad39                         | 7.37117e-09            | 1.00000                | 7.37117e-09 | 1.00000  |
| rad37                         | 6.93326e-09            | 1.00000                | 6.93326e-09 | 1.00000  |
| rad30                         | 5.32333e-09            | 1.00000                | 5.32333e-09 | 1.00000  |
| PAH9+H                        | 3.79203e-10            | 1.00000                | 3.79203e-10 | 1.00000  |
| rad38                         | 1.66034e-10            | 1.00000                | 1.66034e-10 | 1.00000  |
| rad60syn                      | 2.61047e-11            | 1.00000                | 2.61047e-11 | 1.00000  |
| rad60anti                     | 1.28850e-11            | 1.00000                | 1.28850e-11 | 1.00000  |
| PAH10+CH3                     | 1.27171e-11            | 1.00000                | 1.27171e-11 | 1.00000  |
| PAH3+H                        | 1.21014e-11            | 1.00000                | 1.21014e-11 | 1.00000  |
| rad46                         | 1.03119e-11            | 1.00000                | 1.03119e-11 | 1.00000  |
| PhcycC3H3_A+H                 | 2.92361e-12            | 1.00000                | 2.92361e-12 | 1.00000  |
| rad59                         | 2.45281e-12            | 1.00000                | 2.45281e-12 | 1.00000  |
| Benzene+cycloprop-1-enylidene | 7.72089e-13            | 1.00000                | 7.72089e-13 | 1.00000  |
| rad43                         | 5.40149e-13            | 1.00000                | 5.40149e-13 | 1.00000  |
| rad54                         | 4.68161e-13            | 1.00000                | 4.68161e-13 | 1.00000  |
| rad62                         | 1.18546e-13            | 1.00000                | 1.18546e-13 | 1.00000  |
| rad50                         | 8.45267e-14            | 1.00000                | 8.45267e-14 | 1.00000  |
| Phenyl+cycC3H4                | 1.18041e-14            | 1.00000                | 0.00000     | 1.00000  |
| rad70                         | 9.23894e-15            | 1.00000                | 9.23894e-15 | 1.00000  |
| rad55                         | 4.08824e-15            | 1.00000                | 4.08824e-15 | 1.00000  |
| PAH1+H                        | 2.48399e-15            | 1.00000                | 2.48399e-15 | 1.00000  |
| PhcycC3H3_B+H                 | 8.71416e-16            | 1.00000                | 8.71416e-16 | 1.00000  |
| rad52                         | 6.31978e-16            | 1.00000                | 6.31978e-16 | 1.00000  |
| rad58                         | 2.46721e-16            | 1.00000                | 2.46721e-16 | 1.00000  |
| rad51                         | 1.88039e-16            | 1.00000                | 1.88039e-16 | 1.00000  |
| rad34                         | 1.33599e-16            | 1.00000                | 1.33599e-16 | 1.00000  |
| rad41                         | 2.28987e-17            | 1.00000                | 2.28987e-17 | 1.00000  |

|           |             |         |             |         |
|-----------|-------------|---------|-------------|---------|
| rad42     | 1.85493e-17 | 1.00000 | 1.85493e-17 | 1.00000 |
| rad65     | 4.09093e-18 | 1.00000 | 4.09093e-18 | 1.00000 |
| rad53     | 1.20428e-20 | 1.00000 | 1.20428e-20 | 1.00000 |
| rad64     | 1.00148e-21 | 1.00000 | 1.00148e-21 | 1.00000 |
| rad61     | 6.20139e-24 | 1.00000 | 6.20139e-24 | 1.00000 |
| rad56     | 1.06324e-25 | 1.00000 | 1.06324e-25 | 1.00000 |
| rad68syn  | 6.24506e-27 | 1.00000 | 6.24506e-27 | 1.00000 |
| rad68anti | 5.02760e-27 | 1.00000 | 5.02760e-27 | 1.00000 |
| rad6      | 1.22077e-27 | 1.00000 | 1.22077e-27 | 1.00000 |
| rad28     | 6.14777e-30 | 1.00000 | 6.14777e-30 | 1.00000 |
| rad26     | 4.32357e-30 | 1.00000 | 4.32357e-30 | 1.00000 |
| rad47     | 6.28101e-31 | 1.00000 | 6.28101e-31 | 1.00000 |
| rad2      | 5.92723e-31 | 1.00000 | 5.92723e-31 | 1.00000 |
| rad40syn  | 4.43601e-31 | 1.00000 | 4.43601e-31 | 1.00000 |
| rad40anti | 3.49255e-31 | 1.00000 | 3.49255e-31 | 1.00000 |
| rad7      | 8.92880e-32 | 1.00000 | 8.92880e-32 | 1.00000 |
| rad73     | 3.97404e-32 | 1.00000 | 3.97404e-32 | 1.00000 |
| rad1      | 3.85042e-32 | 1.00000 | 3.85042e-32 | 1.00000 |
| rad10     | 3.06854e-32 | 1.00000 | 3.06854e-32 | 1.00000 |
| rad11     | 2.19168e-32 | 1.00000 | 2.19168e-32 | 1.00000 |
| rad3      | 3.71230e-33 | 1.00000 | 3.71230e-33 | 1.00000 |
| rad19anti | 2.96680e-33 | 1.00000 | 2.96680e-33 | 1.00000 |
| PAH8+H    | 2.25812e-33 | 1.00000 | 2.25812e-33 | 1.00000 |
| rad4      | 1.88747e-33 | 1.00000 | 1.88747e-33 | 1.00000 |
| rad13     | 4.96961e-34 | 1.00000 | 4.96961e-34 | 1.00000 |
| rad14     | 2.47841e-34 | 1.00000 | 2.47841e-34 | 1.00000 |
| rad9      | 1.94741e-34 | 1.00000 | 1.94741e-34 | 1.00000 |
| rad25     | 1.30666e-34 | 1.00000 | 1.30666e-34 | 1.00000 |
| rad27     | 2.85978e-35 | 1.00000 | 2.85978e-35 | 1.00000 |
| rad71     | 1.12266e-36 | 1.00000 | 1.12266e-36 | 1.00000 |
| rad33     | 9.43643e-37 | 1.00000 | 9.43643e-37 | 1.00000 |
| rad5      | 6.15149e-37 | 1.00000 | 6.15149e-37 | 1.00000 |
| rad15     | 8.52860e-38 | 1.00000 | 8.52860e-38 | 1.00000 |
| rad31     | 5.86138e-38 | 1.00000 | 5.86138e-38 | 1.00000 |
| rad20     | 2.21521e-41 | 1.00000 | 2.21521e-41 | 1.00000 |
| rad21     | 1.81898e-41 | 1.00000 | 1.81898e-41 | 1.00000 |
| rad19syn  | 2.10397e-42 | 1.00000 | 2.10397e-42 | 1.00000 |
| rad12     | 1.52420e-42 | 1.00000 | 1.52420e-42 | 1.00000 |
| rad23     | 1.37753e-42 | 1.00000 | 1.37753e-42 | 1.00000 |
| rad18     | 1.49213e-43 | 1.00000 | 1.49213e-43 | 1.00000 |
| rad45     | 8.89330e-45 | 1.00000 | 8.89330e-45 | 1.00000 |
| rad22     | 5.43182e-45 | 1.00000 | 5.43182e-45 | 1.00000 |
| rad36     | 5.45314e-46 | 1.00000 | 5.45314e-46 | 1.00000 |
| rad24     | 6.33996e-47 | 1.00000 | 6.33996e-47 | 1.00000 |
| rad8      | 5.76909e-64 | 1.00000 | 5.76909e-64 | 1.00000 |

0.100000000E-04 Pa, 140.000000 K

| Rate constant                 | True (fraction)        | Effective (fraction)   |             |          |
|-------------------------------|------------------------|------------------------|-------------|----------|
| Total                         | 4.99515e-15 (1.00 )    | 4.99515e-15 (1.00 )    |             |          |
| Formation of rad19            | 4.99514e-15 (1.000 )   | 4.99514e-15 (1.000 )   |             |          |
| H-abstraction to cyc2enyl     | 5.62488e-21 (1.13e-06) | 5.62488e-21 (1.13e-06) |             |          |
| H-abstraction to cyclenyl     | 3.00047e-26 (6.01e-12) | 3.00047e-26 (6.01e-12) |             |          |
| species                       | PYtrue                 | Cumul                  | PYeffective | Cumul    |
| Indene+H                      | 0.999703               | 0.999703               | 0.999703    | 0.999703 |
| PhCHCCH2+H                    | 0.000280917            | 0.999984               | 0.000280917 | 0.999984 |
| PhCCH+CH3                     | 4.95294e-06            | 0.999989               | 4.95294e-06 | 0.999989 |
| C2H2+PhCH2                    | 3.71777e-06            | 0.999992               | 3.71777e-06 | 0.999992 |
| PhCCCH3+H                     | 2.86259e-06            | 0.999995               | 2.86259e-06 | 0.999995 |
| Ph+MeAc                       | 2.26007e-06            | 0.999998               | 2.26007e-06 | 0.999998 |
| Benzene+cycloprop-2-enylidene | 1.12607e-06            | 0.999999               | 1.12607e-06 | 0.999999 |
| rad67                         | 6.73023e-07            | 0.999999               | 6.73023e-07 | 0.999999 |
| rad35                         | 2.93770e-07            | 1.000000               | 2.93770e-07 | 1.000000 |
| Ph+Allene                     | 2.22659e-07            | 1.000000               | 2.22659e-07 | 1.000000 |
| PhCH2CCH+H                    | 2.93551e-08            | 1.000000               | 2.93551e-08 | 1.000000 |
| PAH7+H                        | 2.74320e-08            | 1.000000               | 2.74320e-08 | 1.000000 |
| rad39                         | 7.74204e-09            | 1.000000               | 7.74204e-09 | 1.000000 |
| rad37                         | 7.30375e-09            | 1.000000               | 7.30375e-09 | 1.000000 |
| rad30                         | 5.53888e-09            | 1.000000               | 5.53888e-09 | 1.000000 |
| PAH9+H                        | 3.99479e-10            | 1.000000               | 3.99479e-10 | 1.000000 |
| rad38                         | 1.75886e-10            | 1.000000               | 1.75886e-10 | 1.000000 |
| rad60syn                      | 2.76144e-11            | 1.000000               | 2.76144e-11 | 1.000000 |
| PAH10+CH3                     | 1.41941e-11            | 1.000000               | 1.41941e-11 | 1.000000 |
| rad60anti                     | 1.36504e-11            | 1.000000               | 1.36504e-11 | 1.000000 |
| PAH3+H                        | 1.30742e-11            | 1.000000               | 1.30742e-11 | 1.000000 |
| rad46                         | 1.09703e-11            | 1.000000               | 1.09703e-11 | 1.000000 |
| Benzene+cycloprop-1-enylidene | 6.00677e-12            | 1.000000               | 6.00677e-12 | 1.000000 |



|                |             |          |             |          |
|----------------|-------------|----------|-------------|----------|
| PhcycC3H3_A+H  | 3.69543e-12 | 1.000000 | 3.69543e-12 | 1.000000 |
| rad59          | 2.64125e-12 | 1.000000 | 2.64125e-12 | 1.000000 |
| rad43          | 5.94444e-13 | 1.000000 | 5.94444e-13 | 1.000000 |
| rad54          | 5.21918e-13 | 1.000000 | 5.21918e-13 | 1.000000 |
| rad62          | 1.30793e-13 | 1.000000 | 1.30793e-13 | 1.000000 |
| rad50          | 9.26894e-14 | 1.000000 | 9.26894e-14 | 1.000000 |
| Phenyl+cycC3H4 | 1.75978e-14 | 1.000000 | 0.000000    | 1.000000 |
| rad70          | 1.06600e-14 | 1.000000 | 1.06600e-14 | 1.000000 |
| rad55          | 4.71984e-15 | 1.000000 | 4.71984e-15 | 1.000000 |
| PAH1+H         | 3.02078e-15 | 1.000000 | 3.02078e-15 | 1.000000 |
| PhcycC3H3_B+H  | 1.95210e-15 | 1.000000 | 1.95210e-15 | 1.000000 |
| rad52          | 7.09401e-16 | 1.000000 | 7.09401e-16 | 1.000000 |
| rad58          | 2.89095e-16 | 1.000000 | 2.89095e-16 | 1.000000 |
| rad51          | 2.17207e-16 | 1.000000 | 2.17207e-16 | 1.000000 |
| rad34          | 1.62989e-16 | 1.000000 | 1.62989e-16 | 1.000000 |
| rad41          | 2.94364e-17 | 1.000000 | 2.94364e-17 | 1.000000 |
| rad42          | 2.32499e-17 | 1.000000 | 2.32499e-17 | 1.000000 |
| rad65          | 4.78936e-18 | 1.000000 | 4.78936e-18 | 1.000000 |
| rad53          | 2.52918e-20 | 1.000000 | 2.52918e-20 | 1.000000 |
| rad64          | 2.62059e-21 | 1.000000 | 2.62059e-21 | 1.000000 |
| rad61          | 3.06689e-23 | 1.000000 | 3.06689e-23 | 1.000000 |
| rad56          | 6.80093e-25 | 1.000000 | 6.80093e-25 | 1.000000 |
| rad68syn       | 4.60297e-26 | 1.000000 | 4.60297e-26 | 1.000000 |
| rad68anti      | 3.68679e-26 | 1.000000 | 3.68679e-26 | 1.000000 |
| rad6           | 9.82548e-28 | 1.000000 | 9.82548e-28 | 1.000000 |
| rad40syn       | 7.53654e-30 | 1.000000 | 7.53654e-30 | 1.000000 |
| rad40anti      | 5.95184e-30 | 1.000000 | 5.95184e-30 | 1.000000 |
| rad28          | 5.09067e-30 | 1.000000 | 5.09067e-30 | 1.000000 |
| rad26          | 3.75433e-30 | 1.000000 | 3.75433e-30 | 1.000000 |
| rad47          | 6.17134e-31 | 1.000000 | 6.17134e-31 | 1.000000 |
| rad73          | 5.47778e-31 | 1.000000 | 5.47778e-31 | 1.000000 |
| rad2           | 5.43244e-31 | 1.000000 | 5.43244e-31 | 1.000000 |
| rad7           | 7.19924e-32 | 1.000000 | 7.19924e-32 | 1.000000 |
| PAH8+H         | 6.68141e-32 | 1.000000 | 6.68141e-32 | 1.000000 |
| rad1           | 3.54527e-32 | 1.000000 | 3.54527e-32 | 1.000000 |
| rad10          | 2.81709e-32 | 1.000000 | 2.81709e-32 | 1.000000 |
| rad11          | 1.76774e-32 | 1.000000 | 1.76774e-32 | 1.000000 |
| rad19anti      | 6.35586e-33 | 1.000000 | 6.35586e-33 | 1.000000 |
| rad3           | 3.36243e-33 | 1.000000 | 3.36243e-33 | 1.000000 |
| rad4           | 1.71162e-33 | 1.000000 | 1.71162e-33 | 1.000000 |
| rad13          | 4.01166e-34 | 1.000000 | 4.01166e-34 | 1.000000 |
| rad14          | 2.40850e-34 | 1.000000 | 2.40850e-34 | 1.000000 |
| rad9           | 2.14330e-34 | 1.000000 | 2.14330e-34 | 1.000000 |
| rad25          | 1.29042e-34 | 1.000000 | 1.29042e-34 | 1.000000 |
| rad71          | 4.16930e-35 | 1.000000 | 4.16930e-35 | 1.000000 |
| rad27          | 2.84920e-35 | 1.000000 | 2.84920e-35 | 1.000000 |
| rad33          | 7.63309e-37 | 1.000000 | 7.63309e-37 | 1.000000 |
| rad5           | 5.45915e-37 | 1.000000 | 5.45915e-37 | 1.000000 |
| rad31          | 1.04805e-37 | 1.000000 | 1.04805e-37 | 1.000000 |
| rad15          | 9.40260e-38 | 1.000000 | 9.40260e-38 | 1.000000 |
| rad20          | 2.40540e-41 | 1.000000 | 2.40540e-41 | 1.000000 |
| rad21          | 1.99653e-41 | 1.000000 | 1.99653e-41 | 1.000000 |
| rad19syn       | 4.98180e-42 | 1.000000 | 4.98180e-42 | 1.000000 |
| rad23          | 2.12506e-42 | 1.000000 | 2.12506e-42 | 1.000000 |
| rad12          | 1.85504e-42 | 1.000000 | 1.85504e-42 | 1.000000 |
| rad18          | 1.52592e-43 | 1.000000 | 1.52592e-43 | 1.000000 |
| rad45          | 1.37481e-44 | 1.000000 | 1.37481e-44 | 1.000000 |
| rad22          | 4.70040e-45 | 1.000000 | 4.70040e-45 | 1.000000 |
| rad36          | 8.43782e-46 | 1.000000 | 8.43782e-46 | 1.000000 |
| rad24          | 8.18794e-47 | 1.000000 | 8.18794e-47 | 1.000000 |
| rad8           | 8.48096e-64 | 1.000000 | 8.48096e-64 | 1.000000 |

0.100000000E-04 Pa, 150.000000 K

=====

| Rate constant             | True (fraction)        | Effective (fraction)   |
|---------------------------|------------------------|------------------------|
| Total                     | 6.34137e-15 (1.00 )    | 6.34137e-15 (1.00 )    |
| Formation of rad19        | 6.34135e-15 (1.000 )   | 6.34135e-15 (1.000 )   |
| H-abstraction to cyc2enyl | 1.81685e-20 (2.87e-06) | 1.81685e-20 (2.87e-06) |
| H-abstraction to cyclenyl | 2.23765e-25 (3.53e-11) | 2.23765e-25 (3.53e-11) |

  

| species                       | PYtrue      | Cumul    | PYeffective | Cumul    |
|-------------------------------|-------------|----------|-------------|----------|
| Indene+H                      | 0.999692    | 0.999692 | 0.999692    | 0.999692 |
| PhCHCCH2+H                    | 0.000289592 | 0.999982 | 0.000289592 | 0.999982 |
| PhCCH+CH3                     | 5.11623e-06 | 0.999987 | 5.11623e-06 | 0.999987 |
| C2H2+PhCH2                    | 3.86834e-06 | 0.999991 | 3.86834e-06 | 0.999991 |
| PhCCCH3+H                     | 2.96768e-06 | 0.999994 | 2.96768e-06 | 0.999994 |
| Benzene+cycloprop-2-enylidene | 2.86508e-06 | 0.999997 | 2.86508e-06 | 0.999997 |
| Ph+MeAc                       | 2.36224e-06 | 0.999999 | 2.36224e-06 | 0.999999 |

|                               |             |          |             |          |
|-------------------------------|-------------|----------|-------------|----------|
| rad67                         | 7.01968e-07 | 1.000000 | 7.01968e-07 | 1.000000 |
| rad35                         | 3.05869e-07 | 1.000000 | 3.05869e-07 | 1.000000 |
| Ph+Allene                     | 2.36597e-07 | 1.000000 | 2.36597e-07 | 1.000000 |
| PhCH2CCH+H                    | 3.15145e-08 | 1.000000 | 3.15145e-08 | 1.000000 |
| PAH7+H                        | 2.88839e-08 | 1.000000 | 2.88839e-08 | 1.000000 |
| rad39                         | 8.15166e-09 | 1.000000 | 8.15166e-09 | 1.000000 |
| rad37                         | 7.71444e-09 | 1.000000 | 7.71444e-09 | 1.000000 |
| rad30                         | 5.77470e-09 | 1.000000 | 5.77470e-09 | 1.000000 |
| PAH9+H                        | 4.22009e-10 | 1.000000 | 4.22009e-10 | 1.000000 |
| rad38                         | 1.86918e-10 | 1.000000 | 1.86918e-10 | 1.000000 |
| Benzene+cycloprop-1-enylidene | 3.52865e-11 | 1.000000 | 3.52865e-11 | 1.000000 |
| rad60syn                      | 2.92988e-11 | 1.000000 | 2.92988e-11 | 1.000000 |
| PAH10+CH3                     | 1.59406e-11 | 1.000000 | 1.59406e-11 | 1.000000 |
| rad60anti                     | 1.45059e-11 | 1.000000 | 1.45059e-11 | 1.000000 |
| PAH3+H                        | 1.41865e-11 | 1.000000 | 1.41865e-11 | 1.000000 |
| rad46                         | 1.17105e-11 | 1.000000 | 1.17105e-11 | 1.000000 |
| PhcycC3H3_A+H                 | 4.70694e-12 | 1.000000 | 4.70694e-12 | 1.000000 |
| rad59                         | 2.85583e-12 | 1.000000 | 2.85583e-12 | 1.000000 |
| rad43                         | 6.57518e-13 | 1.000000 | 6.57518e-13 | 1.000000 |
| rad54                         | 5.85443e-13 | 1.000000 | 5.85443e-13 | 1.000000 |
| rad62                         | 1.45031e-13 | 1.000000 | 1.45031e-13 | 1.000000 |
| rad50                         | 1.02199e-13 | 1.000000 | 1.02199e-13 | 1.000000 |
| Phenyl+cycC3H4                | 2.61242e-14 | 1.000000 | 0.000000    | 1.000000 |
| rad70                         | 1.23994e-14 | 1.000000 | 1.23994e-14 | 1.000000 |
| rad55                         | 5.49291e-15 | 1.000000 | 5.49291e-15 | 1.000000 |
| PhcycC3H3_B+H                 | 4.08980e-15 | 1.000000 | 4.08980e-15 | 1.000000 |
| PAH1+H                        | 3.71110e-15 | 1.000000 | 3.71110e-15 | 1.000000 |
| rad52                         | 8.01984e-16 | 1.000000 | 8.01984e-16 | 1.000000 |
| rad58                         | 3.41820e-16 | 1.000000 | 3.41820e-16 | 1.000000 |
| rad51                         | 2.53177e-16 | 1.000000 | 2.53177e-16 | 1.000000 |
| rad34                         | 2.00907e-16 | 1.000000 | 2.00907e-16 | 1.000000 |
| rad41                         | 3.81682e-17 | 1.000000 | 3.81682e-17 | 1.000000 |
| rad42                         | 2.93832e-17 | 1.000000 | 2.93832e-17 | 1.000000 |
| rad65                         | 5.66163e-18 | 1.000000 | 5.66163e-18 | 1.000000 |
| rad53                         | 5.02098e-20 | 1.000000 | 5.02098e-20 | 1.000000 |
| rad64                         | 6.27503e-21 | 1.000000 | 6.27503e-21 | 1.000000 |
| rad61                         | 1.25963e-22 | 1.000000 | 1.25963e-22 | 1.000000 |
| rad56                         | 3.47178e-24 | 1.000000 | 3.47178e-24 | 1.000000 |
| rad68syn                      | 2.64356e-25 | 1.000000 | 2.64356e-25 | 1.000000 |
| rad68anti                     | 2.10658e-25 | 1.000000 | 2.10658e-25 | 1.000000 |
| rad6                          | 8.14647e-28 | 1.000000 | 8.14647e-28 | 1.000000 |
| rad40syn                      | 8.88016e-29 | 1.000000 | 8.88016e-29 | 1.000000 |
| rad40anti                     | 7.03998e-29 | 1.000000 | 7.03998e-29 | 1.000000 |
| rad73                         | 5.47735e-30 | 1.000000 | 5.47735e-30 | 1.000000 |
| rad28                         | 4.28962e-30 | 1.000000 | 4.28962e-30 | 1.000000 |
| rad26                         | 3.31571e-30 | 1.000000 | 3.31571e-30 | 1.000000 |
| PAH8+H                        | 1.26388e-30 | 1.000000 | 1.26388e-30 | 1.000000 |
| rad47                         | 6.13969e-31 | 1.000000 | 6.13969e-31 | 1.000000 |
| rad2                          | 5.42113e-31 | 1.000000 | 5.42113e-31 | 1.000000 |
| rad7                          | 5.98005e-32 | 1.000000 | 5.98005e-32 | 1.000000 |
| rad1                          | 3.55565e-32 | 1.000000 | 3.55565e-32 | 1.000000 |
| rad10                         | 2.81479e-32 | 1.000000 | 2.81479e-32 | 1.000000 |
| rad11                         | 1.46890e-32 | 1.000000 | 1.46890e-32 | 1.000000 |
| rad19anti                     | 1.44032e-32 | 1.000000 | 1.44032e-32 | 1.000000 |
| rad3                          | 3.30555e-33 | 1.000000 | 3.30555e-33 | 1.000000 |
| rad4                          | 1.68487e-33 | 1.000000 | 1.68487e-33 | 1.000000 |
| rad71                         | 9.41848e-34 | 1.000000 | 9.41848e-34 | 1.000000 |
| rad13                         | 3.33637e-34 | 1.000000 | 3.33637e-34 | 1.000000 |
| rad9                          | 2.43116e-34 | 1.000000 | 2.43116e-34 | 1.000000 |
| rad14                         | 2.36293e-34 | 1.000000 | 2.36293e-34 | 1.000000 |
| rad25                         | 1.28689e-34 | 1.000000 | 1.28689e-34 | 1.000000 |
| rad27                         | 2.87121e-35 | 1.000000 | 2.87121e-35 | 1.000000 |
| rad33                         | 6.36295e-37 | 1.000000 | 6.36295e-37 | 1.000000 |
| rad5                          | 4.89824e-37 | 1.000000 | 4.89824e-37 | 1.000000 |
| rad31                         | 1.96279e-37 | 1.000000 | 1.96279e-37 | 1.000000 |
| rad15                         | 1.06844e-37 | 1.000000 | 1.06844e-37 | 1.000000 |
| rad20                         | 2.67727e-41 | 1.000000 | 2.67727e-41 | 1.000000 |
| rad21                         | 2.24594e-41 | 1.000000 | 2.24594e-41 | 1.000000 |
| rad19syn                      | 1.23836e-41 | 1.000000 | 1.23836e-41 | 1.000000 |
| rad23                         | 3.67339e-42 | 1.000000 | 3.67339e-42 | 1.000000 |
| rad12                         | 2.35416e-42 | 1.000000 | 2.35416e-42 | 1.000000 |
| rad18                         | 1.58339e-43 | 1.000000 | 1.58339e-43 | 1.000000 |
| rad45                         | 2.38338e-44 | 1.000000 | 2.38338e-44 | 1.000000 |
| rad22                         | 4.26687e-45 | 1.000000 | 4.26687e-45 | 1.000000 |
| rad36                         | 1.46452e-45 | 1.000000 | 1.46452e-45 | 1.000000 |
| rad24                         | 1.08020e-46 | 1.000000 | 1.08020e-46 | 1.000000 |
| rad8                          | 1.27614e-63 | 1.000000 | 1.27614e-63 | 1.000000 |

0.100000000E-04 Pa, 160.000000 K

=====

| Rate constant             | True (fraction)        | Effective (fraction)   |
|---------------------------|------------------------|------------------------|
| Total                     | 7.84423e-15 (1.00 )    | 7.84423e-15 (1.00 )    |
| Formation of rad19        | 7.84418e-15 (1.000 )   | 7.84418e-15 (1.000 )   |
| H-abstraction to cyc2enyl | 5.05321e-20 (6.44e-06) | 5.05321e-20 (6.44e-06) |
| H-abstraction to cyc1enyl | 1.29479e-24 (1.65e-10) | 1.29479e-24 (1.65e-10) |

| species                       | PYtrue      | Cumul    | PYeffective | Cumul    |
|-------------------------------|-------------|----------|-------------|----------|
| Indene+H                      | 0.999679    | 0.999679 | 0.999679    | 0.999679 |
| PhCHCCH2+H                    | 0.000298982 | 0.999978 | 0.000298982 | 0.999978 |
| Benzene+cycloprop-2-enylidene | 6.44194e-06 | 0.999984 | 6.44194e-06 | 0.999984 |
| PhCCH+CH3                     | 5.29275e-06 | 0.999989 | 5.29275e-06 | 0.999989 |
| C2H2+PhCH2                    | 4.03297e-06 | 0.999993 | 4.03297e-06 | 0.999993 |
| PhCCCH3+H                     | 3.08198e-06 | 0.999996 | 3.08198e-06 | 0.999996 |
| Ph+MeAc                       | 2.47440e-06 | 0.999999 | 2.47440e-06 | 0.999999 |
| rad67                         | 7.33696e-07 | 1.000000 | 7.33696e-07 | 1.000000 |
| rad35                         | 3.19106e-07 | 1.000000 | 3.19106e-07 | 1.000000 |
| Ph+Allene                     | 2.52225e-07 | 1.000000 | 2.52225e-07 | 1.000000 |
| PhCH2CCH+H                    | 3.39642e-08 | 1.000000 | 3.39642e-08 | 1.000000 |
| PAH7+H                        | 3.04941e-08 | 1.000000 | 3.04941e-08 | 1.000000 |
| rad39                         | 8.60566e-09 | 1.000000 | 8.60566e-09 | 1.000000 |
| rad37                         | 8.17136e-09 | 1.000000 | 8.17136e-09 | 1.000000 |
| rad30                         | 6.03351e-09 | 1.000000 | 6.03351e-09 | 1.000000 |
| PAH9+H                        | 4.47144e-10 | 1.000000 | 4.47144e-10 | 1.000000 |
| rad38                         | 1.99330e-10 | 1.000000 | 1.99330e-10 | 1.000000 |
| Benzene+cycloprop-1-enylidene | 1.65062e-10 | 1.000000 | 1.65062e-10 | 1.000000 |
| rad60syn                      | 3.11859e-11 | 1.000000 | 3.11859e-11 | 1.000000 |
| PAH10+CH3                     | 1.80192e-11 | 1.000000 | 1.80192e-11 | 1.000000 |
| rad60anti                     | 1.54660e-11 | 1.000000 | 1.54660e-11 | 1.000000 |
| PAH3+H                        | 1.54653e-11 | 1.000000 | 1.54653e-11 | 1.000000 |
| rad46                         | 1.25466e-11 | 1.000000 | 1.25466e-11 | 1.000000 |
| PhcycC3H3_A+H                 | 6.04093e-12 | 1.000000 | 6.04093e-12 | 1.000000 |
| rad59                         | 3.10145e-12 | 1.000000 | 3.10145e-12 | 1.000000 |
| rad43                         | 7.31201e-13 | 1.000000 | 7.31201e-13 | 1.000000 |
| rad54                         | 6.61019e-13 | 1.000000 | 6.61019e-13 | 1.000000 |
| rad62                         | 1.61671e-13 | 1.000000 | 1.61671e-13 | 1.000000 |
| rad50                         | 1.13351e-13 | 1.000000 | 1.13351e-13 | 1.000000 |
| Phenyl+cycC3H4                | 3.86829e-14 | 1.000000 | 0.000000    | 1.000000 |
| rad70                         | 1.45456e-14 | 1.000000 | 1.45456e-14 | 1.000000 |
| PhcycC3H3_B+H                 | 8.12740e-15 | 1.000000 | 8.12740e-15 | 1.000000 |
| rad55                         | 6.44667e-15 | 1.000000 | 6.44667e-15 | 1.000000 |
| PAH1+H                        | 4.60688e-15 | 1.000000 | 4.60688e-15 | 1.000000 |
| rad52                         | 9.13579e-16 | 1.000000 | 9.13579e-16 | 1.000000 |
| rad58                         | 4.08006e-16 | 1.000000 | 4.08006e-16 | 1.000000 |
| rad51                         | 2.97956e-16 | 1.000000 | 2.97956e-16 | 1.000000 |
| rad34                         | 2.50278e-16 | 1.000000 | 2.50278e-16 | 1.000000 |
| rad41                         | 4.99159e-17 | 1.000000 | 4.99159e-17 | 1.000000 |
| rad42                         | 3.74398e-17 | 1.000000 | 3.74398e-17 | 1.000000 |
| rad65                         | 6.76163e-18 | 1.000000 | 6.76163e-18 | 1.000000 |
| rad53                         | 9.55509e-20 | 1.000000 | 9.55509e-20 | 1.000000 |
| rad64                         | 1.40203e-20 | 1.000000 | 1.40203e-20 | 1.000000 |
| rad61                         | 4.46330e-22 | 1.000000 | 4.46330e-22 | 1.000000 |
| rad56                         | 1.48090e-23 | 1.000000 | 1.48090e-23 | 1.000000 |
| rad68syn                      | 1.24419e-24 | 1.000000 | 1.24419e-24 | 1.000000 |
| rad68anti                     | 9.86155e-25 | 1.000000 | 9.86155e-25 | 1.000000 |
| rad40syn                      | 7.79816e-28 | 1.000000 | 7.79816e-28 | 1.000000 |
| rad6                          | 6.97939e-28 | 1.000000 | 6.97939e-28 | 1.000000 |
| rad40anti                     | 6.20621e-28 | 1.000000 | 6.20621e-28 | 1.000000 |
| rad73                         | 4.23082e-29 | 1.000000 | 4.23082e-29 | 1.000000 |
| PAH8+H                        | 1.68146e-29 | 1.000000 | 1.68146e-29 | 1.000000 |
| rad28                         | 3.67467e-30 | 1.000000 | 3.67467e-30 | 1.000000 |
| rad26                         | 2.98010e-30 | 1.000000 | 2.98010e-30 | 1.000000 |
| rad47                         | 6.18326e-31 | 1.000000 | 6.18326e-31 | 1.000000 |
| rad2                          | 5.95428e-31 | 1.000000 | 5.95428e-31 | 1.000000 |
| rad7                          | 5.13316e-32 | 1.000000 | 5.13316e-32 | 1.000000 |
| rad1                          | 3.92670e-32 | 1.000000 | 3.92670e-32 | 1.000000 |
| rad19anti                     | 3.44722e-32 | 1.000000 | 3.44722e-32 | 1.000000 |
| rad10                         | 3.09642e-32 | 1.000000 | 3.09642e-32 | 1.000000 |
| rad71                         | 1.46142e-32 | 1.000000 | 1.46142e-32 | 1.000000 |
| rad11                         | 1.26134e-32 | 1.000000 | 1.26134e-32 | 1.000000 |
| rad3                          | 3.57104e-33 | 1.000000 | 3.57104e-33 | 1.000000 |
| rad4                          | 1.82281e-33 | 1.000000 | 1.82281e-33 | 1.000000 |
| rad13                         | 2.86755e-34 | 1.000000 | 2.86755e-34 | 1.000000 |
| rad9                          | 2.83617e-34 | 1.000000 | 2.83617e-34 | 1.000000 |
| rad14                         | 2.33828e-34 | 1.000000 | 2.33828e-34 | 1.000000 |
| rad25                         | 1.29466e-34 | 1.000000 | 1.29466e-34 | 1.000000 |
| rad27                         | 2.92421e-35 | 1.000000 | 2.92421e-35 | 1.000000 |
| rad33                         | 5.48307e-37 | 1.000000 | 5.48307e-37 | 1.000000 |
| rad5                          | 4.43592e-37 | 1.000000 | 4.43592e-37 | 1.000000 |

|          |             |         |             |         |
|----------|-------------|---------|-------------|---------|
| rad31    | 3.84794e-37 | 1.00000 | 3.84794e-37 | 1.00000 |
| rad15    | 1.24872e-37 | 1.00000 | 1.24872e-37 | 1.00000 |
| rad19syn | 3.23538e-41 | 1.00000 | 3.23538e-41 | 1.00000 |
| rad20    | 3.04449e-41 | 1.00000 | 3.04449e-41 | 1.00000 |
| rad21    | 2.58117e-41 | 1.00000 | 2.58117e-41 | 1.00000 |
| rad23    | 7.02384e-42 | 1.00000 | 7.02384e-42 | 1.00000 |
| rad12    | 3.10954e-42 | 1.00000 | 3.10954e-42 | 1.00000 |
| rad18    | 1.66399e-43 | 1.00000 | 1.66399e-43 | 1.00000 |
| rad45    | 4.57447e-44 | 1.00000 | 4.57447e-44 | 1.00000 |
| rad22    | 4.12990e-45 | 1.00000 | 4.12990e-45 | 1.00000 |
| rad36    | 2.81495e-45 | 1.00000 | 2.81495e-45 | 1.00000 |
| rad24    | 1.45450e-46 | 1.00000 | 1.45450e-46 | 1.00000 |
| rad8     | 1.96347e-63 | 1.00000 | 1.96347e-63 | 1.00000 |

0.100000000E-04 Pa, 170.000000 K

| Rate constant             | True (fraction)        | Effective (fraction)   |
|---------------------------|------------------------|------------------------|
| Total                     | 9.49598e-15 (1.00 )    | 9.49598e-15 (1.00 )    |
| Formation of rad19        | 9.49586e-15 (1.000 )   | 9.49586e-15 (1.000 )   |
| H-abstraction to cyc2enyl | 1.24279e-19 (1.31e-05) | 1.24279e-19 (1.31e-05) |
| H-abstraction to cyclenyl | 6.08025e-24 (6.40e-10) | 6.08025e-24 (6.40e-10) |

| species                       | PYtrue      | Cumul    | PYeffective | Cumul    |
|-------------------------------|-------------|----------|-------------|----------|
| Indene+H                      | 0.999661    | 0.999661 | 0.999661    | 0.999661 |
| PhCHCCH2+H                    | 0.000309167 | 0.999970 | 0.000309167 | 0.999970 |
| Benzene+cycloprop-2-enylidene | 1.30875e-05 | 0.999983 | 1.30875e-05 | 0.999983 |
| PhCCH+CH3                     | 5.48398e-06 | 0.999989 | 5.48398e-06 | 0.999989 |
| C2H2+PhCH2                    | 4.21347e-06 | 0.999993 | 4.21347e-06 | 0.999993 |
| PhCCCH3+H                     | 3.20659e-06 | 0.999996 | 3.20659e-06 | 0.999996 |
| Ph+MeAc                       | 2.59788e-06 | 0.999999 | 2.59788e-06 | 0.999999 |
| rad67                         | 7.68575e-07 | 0.999999 | 7.68575e-07 | 0.999999 |
| rad35                         | 3.33631e-07 | 1.000000 | 3.33631e-07 | 1.000000 |
| Ph+Allene                     | 2.69815e-07 | 1.000000 | 2.69815e-07 | 1.000000 |
| PhCH2CCH+H                    | 3.67553e-08 | 1.000000 | 3.67553e-08 | 1.000000 |
| PAH7+H                        | 3.22858e-08 | 1.000000 | 3.22858e-08 | 1.000000 |
| rad39                         | 9.11053e-09 | 1.000000 | 9.11053e-09 | 1.000000 |
| rad37                         | 8.68151e-09 | 1.000000 | 8.68151e-09 | 1.000000 |
| rad30                         | 6.31840e-09 | 1.000000 | 6.31840e-09 | 1.000000 |
| Benzene+cycloprop-1-enylidene | 6.40297e-10 | 1.000000 | 6.40297e-10 | 1.000000 |
| PAH9+H                        | 4.75293e-10 | 1.000000 | 4.75293e-10 | 1.000000 |
| rad38                         | 2.13351e-10 | 1.000000 | 2.13351e-10 | 1.000000 |
| rad60syn                      | 3.33085e-11 | 1.000000 | 3.33085e-11 | 1.000000 |
| PAH10+CH3                     | 2.05094e-11 | 1.000000 | 2.05094e-11 | 1.000000 |
| PAH3+H                        | 1.69431e-11 | 1.000000 | 1.69431e-11 | 1.000000 |
| rad60anti                     | 1.65480e-11 | 1.000000 | 1.65480e-11 | 1.000000 |
| rad46                         | 1.34952e-11 | 1.000000 | 1.34952e-11 | 1.000000 |
| PhcycC3H3_A+H                 | 7.80973e-12 | 1.000000 | 7.80973e-12 | 1.000000 |
| rad59                         | 3.38400e-12 | 1.000000 | 3.38400e-12 | 1.000000 |
| rad43                         | 8.17741e-13 | 1.000000 | 8.17741e-13 | 1.000000 |
| rad54                         | 7.51513e-13 | 1.000000 | 7.51513e-13 | 1.000000 |
| rad62                         | 1.81220e-13 | 1.000000 | 1.81220e-13 | 1.000000 |
| rad50                         | 1.26512e-13 | 1.000000 | 1.26512e-13 | 1.000000 |
| Phenyl+cycC3H4                | 5.71891e-14 | 1.000000 | 0.000000    | 1.000000 |
| rad70                         | 1.72141e-14 | 1.000000 | 1.72141e-14 | 1.000000 |
| PhcycC3H3_B+H                 | 1.54798e-14 | 1.000000 | 1.54798e-14 | 1.000000 |
| rad55                         | 7.63213e-15 | 1.000000 | 7.63213e-15 | 1.000000 |
| PAH1+H                        | 5.77896e-15 | 1.000000 | 5.77896e-15 | 1.000000 |
| rad52                         | 1.04913e-15 | 1.000000 | 1.04913e-15 | 1.000000 |
| rad58                         | 4.91782e-16 | 1.000000 | 4.91782e-16 | 1.000000 |
| rad51                         | 3.54208e-16 | 1.000000 | 3.54208e-16 | 1.000000 |
| rad34                         | 3.15101e-16 | 1.000000 | 3.15101e-16 | 1.000000 |
| rad41                         | 6.58202e-17 | 1.000000 | 6.58202e-17 | 1.000000 |
| rad42                         | 4.80840e-17 | 1.000000 | 4.80840e-17 | 1.000000 |
| rad65                         | 8.16175e-18 | 1.000000 | 8.16175e-18 | 1.000000 |
| rad53                         | 1.76035e-19 | 1.000000 | 1.76035e-19 | 1.000000 |
| rad64                         | 2.96516e-20 | 1.000000 | 2.96516e-20 | 1.000000 |
| rad61                         | 1.40406e-21 | 1.000000 | 1.40406e-21 | 1.000000 |
| rad56                         | 5.46520e-23 | 1.000000 | 5.46520e-23 | 1.000000 |
| rad68syn                      | 4.98616e-24 | 1.000000 | 4.98616e-24 | 1.000000 |
| rad68anti                     | 3.92935e-24 | 1.000000 | 3.92935e-24 | 1.000000 |
| rad40syn                      | 5.38958e-27 | 1.000000 | 5.38958e-27 | 1.000000 |
| rad40anti                     | 4.30388e-27 | 1.000000 | 4.30388e-27 | 1.000000 |
| rad6                          | 6.22020e-28 | 1.000000 | 6.22020e-28 | 1.000000 |
| rad73                         | 2.64778e-28 | 1.000000 | 2.64778e-28 | 1.000000 |
| PAH8+H                        | 1.67789e-28 | 1.000000 | 1.67789e-28 | 1.000000 |
| rad28                         | 3.20123e-30 | 1.000000 | 3.20123e-30 | 1.000000 |
| rad26                         | 2.73226e-30 | 1.000000 | 2.73226e-30 | 1.000000 |
| rad2                          | 7.24347e-31 | 1.000000 | 7.24347e-31 | 1.000000 |

|           |             |         |             |         |
|-----------|-------------|---------|-------------|---------|
| rad47     | 6.30333e-31 | 1.00000 | 6.30333e-31 | 1.00000 |
| rad71     | 1.66935e-31 | 1.00000 | 1.66935e-31 | 1.00000 |
| rad19anti | 8.69992e-32 | 1.00000 | 8.69992e-32 | 1.00000 |
| rad1      | 4.80537e-32 | 1.00000 | 4.80537e-32 | 1.00000 |
| rad7      | 4.58386e-32 | 1.00000 | 4.58386e-32 | 1.00000 |
| rad10     | 3.77069e-32 | 1.00000 | 3.77069e-32 | 1.00000 |
| rad11     | 1.12682e-32 | 1.00000 | 1.12682e-32 | 1.00000 |
| rad3      | 4.26828e-33 | 1.00000 | 4.26828e-33 | 1.00000 |
| rad4      | 2.18215e-33 | 1.00000 | 2.18215e-33 | 1.00000 |
| rad9      | 3.39804e-34 | 1.00000 | 3.39804e-34 | 1.00000 |
| rad13     | 2.56415e-34 | 1.00000 | 2.56415e-34 | 1.00000 |
| rad14     | 2.33245e-34 | 1.00000 | 2.33245e-34 | 1.00000 |
| rad25     | 1.31294e-34 | 1.00000 | 1.31294e-34 | 1.00000 |
| rad27     | 3.00876e-35 | 1.00000 | 3.00876e-35 | 1.00000 |
| rad31     | 7.89307e-37 | 1.00000 | 7.89307e-37 | 1.00000 |
| rad33     | 4.91687e-37 | 1.00000 | 4.91687e-37 | 1.00000 |
| rad5      | 4.04910e-37 | 1.00000 | 4.04910e-37 | 1.00000 |
| rad15     | 1.49893e-37 | 1.00000 | 1.49893e-37 | 1.00000 |
| rad19syn  | 8.89196e-41 | 1.00000 | 8.89196e-41 | 1.00000 |
| rad20     | 3.52887e-41 | 1.00000 | 3.52887e-41 | 1.00000 |
| rad21     | 3.02375e-41 | 1.00000 | 3.02375e-41 | 1.00000 |
| rad23     | 1.47557e-41 | 1.00000 | 1.47557e-41 | 1.00000 |
| rad12     | 4.26908e-42 | 1.00000 | 4.26908e-42 | 1.00000 |
| rad18     | 1.76878e-43 | 1.00000 | 1.76878e-43 | 1.00000 |
| rad45     | 9.65770e-44 | 1.00000 | 9.65770e-44 | 1.00000 |
| rad36     | 5.95339e-45 | 1.00000 | 5.95339e-45 | 1.00000 |
| rad22     | 4.41374e-45 | 1.00000 | 4.41374e-45 | 1.00000 |
| rad24     | 1.99788e-46 | 1.00000 | 1.99788e-46 | 1.00000 |
| rad8      | 3.08694e-63 | 1.00000 | 3.08694e-63 | 1.00000 |

0.100000000E-04 Pa, 180.000000 K

| Rate constant                 | True (fraction)        | Effective (fraction)   |             |          |
|-------------------------------|------------------------|------------------------|-------------|----------|
| Total                         | 1.12884e-14 (1.00 )    | 1.12884e-14 (1.00 )    |             |          |
| Formation of rad19            | 1.12881e-14 (1.000 )   | 1.12881e-14 (1.000 )   |             |          |
| H-abstraction to cyc2enyl     | 2.75916e-19 (2.44e-05) | 2.75916e-19 (2.44e-05) |             |          |
| H-abstraction to cyclenyl     | 2.39955e-23 (2.13e-09) | 2.39955e-23 (2.13e-09) |             |          |
| species                       | PYtrue                 | Cumul                  | PYeffective | Cumul    |
| Indene+H                      | 0.999638               | 0.999638               | 0.999638    | 0.999638 |
| PhCHCCH2+H                    | 0.000320239            | 0.999958               | 0.000320239 | 0.999958 |
| Benzene+cycloprop-2-enylidene | 2.44424e-05            | 0.999982               | 2.44424e-05 | 0.999982 |
| PhCCH+CH3                     | 5.69151e-06            | 0.999988               | 5.69151e-06 | 0.999988 |
| C2H2+PhCH2                    | 4.41182e-06            | 0.999992               | 4.41182e-06 | 0.999992 |
| PhCCCH3+H                     | 3.34271e-06            | 0.999996               | 3.34271e-06 | 0.999996 |
| Ph+MeAc                       | 2.73412e-06            | 0.999998               | 2.73412e-06 | 0.999998 |
| rad67                         | 8.07010e-07            | 0.999999               | 8.07010e-07 | 0.999999 |
| rad35                         | 3.49603e-07            | 1.000000               | 3.49603e-07 | 1.000000 |
| Ph+Allene                     | 2.89684e-07            | 1.000000               | 2.89684e-07 | 1.000000 |
| PhCH2CCH+H                    | 3.99485e-08            | 1.000000               | 3.99485e-08 | 1.000000 |
| PAH7+H                        | 3.42855e-08            | 1.000000               | 3.42855e-08 | 1.000000 |
| rad39                         | 9.67358e-09            | 1.000000               | 9.67358e-09 | 1.000000 |
| rad37                         | 9.25289e-09            | 1.000000               | 9.25289e-09 | 1.000000 |
| rad30                         | 6.63280e-09            | 1.000000               | 6.63280e-09 | 1.000000 |
| Benzene+cycloprop-1-enylidene | 2.12567e-09            | 1.000000               | 2.12567e-09 | 1.000000 |
| PAH9+H                        | 5.06928e-10            | 1.000000               | 5.06928e-10 | 1.000000 |
| rad38                         | 2.29255e-10            | 1.000000               | 2.29255e-10 | 1.000000 |
| rad60syn                      | 3.57046e-11            | 1.000000               | 3.57046e-11 | 1.000000 |
| PAH10+CH3                     | 2.35102e-11            | 1.000000               | 2.35102e-11 | 1.000000 |
| PAH3+H                        | 1.86591e-11            | 1.000000               | 1.86591e-11 | 1.000000 |
| rad60anti                     | 1.77718e-11            | 1.000000               | 1.77718e-11 | 1.000000 |
| rad46                         | 1.45760e-11            | 1.000000               | 1.45760e-11 | 1.000000 |
| PhcycC3H3_A+H                 | 1.01655e-11            | 1.000000               | 1.01655e-11 | 1.000000 |
| rad59                         | 3.71052e-12            | 1.000000               | 3.71052e-12 | 1.000000 |
| rad43                         | 9.19879e-13            | 1.000000               | 9.19879e-13 | 1.000000 |
| rad54                         | 8.60521e-13            | 1.000000               | 8.60521e-13 | 1.000000 |
| rad62                         | 2.04291e-13            | 1.000000               | 2.04291e-13 | 1.000000 |
| rad50                         | 1.42141e-13            | 1.000000               | 1.42141e-13 | 1.000000 |
| Phenyl+cycC3H4                | 8.44565e-14            | 1.000000               | 0.000000    | 1.000000 |
| PhcycC3H3_B+H                 | 2.84776e-14            | 1.000000               | 2.84776e-14 | 1.000000 |
| rad70                         | 2.05555e-14            | 1.000000               | 2.05555e-14 | 1.000000 |
| rad55                         | 9.11576e-15            | 1.000000               | 9.11576e-15 | 1.000000 |
| PAH1+H                        | 7.32392e-15            | 1.000000               | 7.32392e-15 | 1.000000 |
| rad52                         | 1.21498e-15            | 1.000000               | 1.21498e-15 | 1.000000 |
| rad58                         | 5.98635e-16            | 1.000000               | 5.98635e-16 | 1.000000 |
| rad51                         | 4.25484e-16            | 1.000000               | 4.25484e-16 | 1.000000 |
| rad34                         | 4.00856e-16            | 1.000000               | 4.00856e-16 | 1.000000 |
| rad41                         | 8.74643e-17            | 1.000000               | 8.74643e-17 | 1.000000 |

|           |             |          |             |          |
|-----------|-------------|----------|-------------|----------|
| rad42     | 6.22156e-17 | 1.000000 | 6.22156e-17 | 1.000000 |
| rad65     | 9.95946e-18 | 1.000000 | 9.95946e-18 | 1.000000 |
| rad53     | 3.16149e-19 | 1.000000 | 3.16149e-19 | 1.000000 |
| rad64     | 5.99924e-20 | 1.000000 | 5.99924e-20 | 1.000000 |
| rad61     | 4.00801e-21 | 1.000000 | 4.00801e-21 | 1.000000 |
| rad56     | 1.79227e-22 | 1.000000 | 1.79227e-22 | 1.000000 |
| rad68syn  | 1.75240e-23 | 1.000000 | 1.75240e-23 | 1.000000 |
| rad68anti | 1.37247e-23 | 1.000000 | 1.37247e-23 | 1.000000 |
| rad40syn  | 3.05803e-26 | 1.000000 | 3.05803e-26 | 1.000000 |
| rad40anti | 2.44831e-26 | 1.000000 | 2.44831e-26 | 1.000000 |
| rad73     | 1.39313e-27 | 1.000000 | 1.39313e-27 | 1.000000 |
| PAH8+H    | 1.32188e-27 | 1.000000 | 1.32188e-27 | 1.000000 |
| rad6      | 5.83122e-28 | 1.000000 | 5.83122e-28 | 1.000000 |
| rad28     | 2.84194e-30 | 1.000000 | 2.84194e-30 | 1.000000 |
| rad26     | 2.56764e-30 | 1.000000 | 2.56764e-30 | 1.000000 |
| rad71     | 1.48898e-30 | 1.000000 | 1.48898e-30 | 1.000000 |
| rad2      | 9.70904e-31 | 1.000000 | 9.70904e-31 | 1.000000 |
| rad47     | 6.50510e-31 | 1.000000 | 6.50510e-31 | 1.000000 |
| rad19anti | 2.31120e-31 | 1.000000 | 2.31120e-31 | 1.000000 |
| rad1      | 6.48284e-32 | 1.000000 | 6.48284e-32 | 1.000000 |
| rad10     | 5.06365e-32 | 1.000000 | 5.06365e-32 | 1.000000 |
| rad7      | 4.30601e-32 | 1.000000 | 4.30601e-32 | 1.000000 |
| rad11     | 1.05895e-32 | 1.000000 | 1.05895e-32 | 1.000000 |
| rad3      | 5.62831e-33 | 1.000000 | 5.62831e-33 | 1.000000 |
| rad4      | 2.88245e-33 | 1.000000 | 2.88245e-33 | 1.000000 |
| rad9      | 4.17841e-34 | 1.000000 | 4.17841e-34 | 1.000000 |
| rad13     | 2.41211e-34 | 1.000000 | 2.41211e-34 | 1.000000 |
| rad14     | 2.34441e-34 | 1.000000 | 2.34441e-34 | 1.000000 |
| rad25     | 1.34136e-34 | 1.000000 | 1.34136e-34 | 1.000000 |
| rad27     | 3.12785e-35 | 1.000000 | 3.12785e-35 | 1.000000 |
| rad31     | 1.69335e-36 | 1.000000 | 1.69335e-36 | 1.000000 |
| rad33     | 4.63904e-37 | 1.000000 | 4.63904e-37 | 1.000000 |
| rad5      | 3.72113e-37 | 1.000000 | 3.72113e-37 | 1.000000 |
| rad15     | 1.84676e-37 | 1.000000 | 1.84676e-37 | 1.000000 |
| rad19syn  | 2.57212e-40 | 1.000000 | 2.57212e-40 | 1.000000 |
| rad20     | 4.16256e-41 | 1.000000 | 4.16256e-41 | 1.000000 |
| rad21     | 3.60504e-41 | 1.000000 | 3.60504e-41 | 1.000000 |
| rad23     | 3.39671e-41 | 1.000000 | 3.39671e-41 | 1.000000 |
| rad12     | 6.08554e-42 | 1.000000 | 6.08554e-42 | 1.000000 |
| rad45     | 2.23713e-43 | 1.000000 | 2.23713e-43 | 1.000000 |
| rad18     | 1.90030e-43 | 1.000000 | 1.90030e-43 | 1.000000 |
| rad36     | 1.38192e-44 | 1.000000 | 1.38192e-44 | 1.000000 |
| rad22     | 5.52309e-45 | 1.000000 | 5.52309e-45 | 1.000000 |
| rad24     | 2.79860e-46 | 1.000000 | 2.79860e-46 | 1.000000 |
| rad8      | 4.95695e-63 | 1.000000 | 4.95695e-63 | 1.000000 |

0.100000000E-04 Pa, 190.000000 K

=====

| Rate constant             | True (fraction)        | Effective (fraction)   |
|---------------------------|------------------------|------------------------|
| Total                     | 1.32132e-14 (1.00 )    | 1.32132e-14 (1.00 )    |
| Formation of rad19        | 1.32126e-14 (1.000 )   | 1.32126e-14 (1.000 )   |
| H-abstraction to cyc2enyl | 5.62053e-19 (4.25e-05) | 5.62053e-19 (4.25e-05) |
| H-abstraction to cyclenyl | 8.18073e-23 (6.19e-09) | 8.18073e-23 (6.19e-09) |

| species                       | PYtrue      | Cumul    | PYeffective | Cumul    |
|-------------------------------|-------------|----------|-------------|----------|
| Indene+H                      | 0.999606    | 0.999606 | 0.999606    | 0.999606 |
| PhCHCCH2+H                    | 0.000332293 | 0.999939 | 0.000332293 | 0.999939 |
| Benzene+cycloprop-2-enylidene | 4.25373e-05 | 0.999981 | 4.25373e-05 | 0.999981 |
| PhCCH+CH3                     | 5.91706e-06 | 0.999987 | 5.91706e-06 | 0.999987 |
| C2H2+PhCH2                    | 4.63023e-06 | 0.999992 | 4.63023e-06 | 0.999992 |
| PhCCCH3+H                     | 3.49167e-06 | 0.999995 | 3.49167e-06 | 0.999995 |
| Ph+MeAc                       | 2.88479e-06 | 0.999998 | 2.88479e-06 | 0.999998 |
| rad67                         | 8.49457e-07 | 0.999999 | 8.49457e-07 | 0.999999 |
| rad35                         | 3.67207e-07 | 0.999999 | 3.67207e-07 | 0.999999 |
| Ph+Allene                     | 3.12197e-07 | 1.000000 | 3.12197e-07 | 1.000000 |
| PhCH2CCH+H                    | 4.36150e-08 | 1.000000 | 4.36150e-08 | 1.000000 |
| PAH7+H                        | 3.65229e-08 | 1.000000 | 3.65229e-08 | 1.000000 |
| rad39                         | 1.03032e-08 | 1.000000 | 1.03032e-08 | 1.000000 |
| rad37                         | 9.89464e-09 | 1.000000 | 9.89464e-09 | 1.000000 |
| rad30                         | 6.98058e-09 | 1.000000 | 6.98058e-09 | 1.000000 |
| Benzene+cycloprop-1-enylidene | 6.19133e-09 | 1.000000 | 6.19133e-09 | 1.000000 |
| PAH9+H                        | 5.42589e-10 | 1.000000 | 5.42589e-10 | 1.000000 |
| rad38                         | 2.47359e-10 | 1.000000 | 2.47359e-10 | 1.000000 |
| rad60syn                      | 3.84183e-11 | 1.000000 | 3.84183e-11 | 1.000000 |
| PAH10+CH3                     | 2.71459e-11 | 1.000000 | 2.71459e-11 | 1.000000 |
| PAH3+H                        | 2.06610e-11 | 1.000000 | 2.06610e-11 | 1.000000 |
| rad60anti                     | 1.91607e-11 | 1.000000 | 1.91607e-11 | 1.000000 |
| rad46                         | 1.58119e-11 | 1.000000 | 1.58119e-11 | 1.000000 |

|                |             |          |             |          |
|----------------|-------------|----------|-------------|----------|
| PhcycC3H3_A+H  | 1.33135e-11 | 1.000000 | 1.33135e-11 | 1.000000 |
| rad59          | 4.08945e-12 | 1.000000 | 4.08945e-12 | 1.000000 |
| rad43          | 1.04096e-12 | 1.000000 | 1.04096e-12 | 1.000000 |
| rad54          | 9.92550e-13 | 1.000000 | 9.92550e-13 | 1.000000 |
| rad62          | 2.31631e-13 | 1.000000 | 2.31631e-13 | 1.000000 |
| rad50          | 1.60800e-13 | 1.000000 | 1.60800e-13 | 1.000000 |
| Phenyl+cycC3H4 | 1.24603e-13 | 1.000000 | 0.000000    | 1.000000 |
| PhcycC3H3_B+H  | 5.08976e-14 | 1.000000 | 5.08976e-14 | 1.000000 |
| rad70          | 2.47657e-14 | 1.000000 | 2.47657e-14 | 1.000000 |
| rad55          | 1.09840e-14 | 1.000000 | 1.09840e-14 | 1.000000 |
| PAH1+H         | 9.37355e-15 | 1.000000 | 9.37355e-15 | 1.000000 |
| rad52          | 1.41930e-15 | 1.000000 | 1.41930e-15 | 1.000000 |
| rad58          | 7.35873e-16 | 1.000000 | 7.35873e-16 | 1.000000 |
| rad51          | 5.16511e-16 | 1.000000 | 5.16511e-16 | 1.000000 |
| rad34          | 5.15047e-16 | 1.000000 | 5.15047e-16 | 1.000000 |
| rad41          | 1.17041e-16 | 1.000000 | 1.17041e-16 | 1.000000 |
| rad42          | 8.10501e-17 | 1.000000 | 8.10501e-17 | 1.000000 |
| rad65          | 1.22861e-17 | 1.000000 | 1.22861e-17 | 1.000000 |
| rad53          | 5.56218e-19 | 1.000000 | 5.56218e-19 | 1.000000 |
| rad64          | 1.17042e-19 | 1.000000 | 1.17042e-19 | 1.000000 |
| rad61          | 1.05588e-20 | 1.000000 | 1.05588e-20 | 1.000000 |
| rad56          | 5.33230e-22 | 1.000000 | 5.33230e-22 | 1.000000 |
| rad68syn       | 5.52670e-23 | 1.000000 | 5.52670e-23 | 1.000000 |
| rad68anti      | 4.30019e-23 | 1.000000 | 4.30019e-23 | 1.000000 |
| rad40syn       | 1.47212e-25 | 1.000000 | 1.47212e-25 | 1.000000 |
| rad40anti      | 1.18054e-25 | 1.000000 | 1.18054e-25 | 1.000000 |
| PAH8+H         | 8.53886e-27 | 1.000000 | 8.53886e-27 | 1.000000 |
| rad73          | 6.34252e-27 | 1.000000 | 6.34252e-27 | 1.000000 |
| rad6           | 5.84094e-28 | 1.000000 | 5.84094e-28 | 1.000000 |
| rad71          | 1.07847e-29 | 1.000000 | 1.07847e-29 | 1.000000 |
| rad28          | 2.58296e-30 | 1.000000 | 2.58296e-30 | 1.000000 |
| rad26          | 2.49327e-30 | 1.000000 | 2.49327e-30 | 1.000000 |
| rad2           | 1.42214e-30 | 1.000000 | 1.42214e-30 | 1.000000 |
| rad47          | 6.79801e-31 | 1.000000 | 6.79801e-31 | 1.000000 |
| rad19anti      | 6.45013e-31 | 1.000000 | 6.45013e-31 | 1.000000 |
| rad1           | 9.56278e-32 | 1.000000 | 9.56278e-32 | 1.000000 |
| rad10          | 7.42758e-32 | 1.000000 | 7.42758e-32 | 1.000000 |
| rad7           | 4.32232e-32 | 1.000000 | 4.32232e-32 | 1.000000 |
| rad11          | 1.06342e-32 | 1.000000 | 1.06342e-32 | 1.000000 |
| rad3           | 8.11407e-33 | 1.000000 | 8.11407e-33 | 1.000000 |
| rad4           | 4.16340e-33 | 1.000000 | 4.16340e-33 | 1.000000 |
| rad9           | 5.27540e-34 | 1.000000 | 5.27540e-34 | 1.000000 |
| rad13          | 2.42483e-34 | 1.000000 | 2.42483e-34 | 1.000000 |
| rad14          | 2.37423e-34 | 1.000000 | 2.37423e-34 | 1.000000 |
| rad25          | 1.37992e-34 | 1.000000 | 1.37992e-34 | 1.000000 |
| rad27          | 3.28775e-35 | 1.000000 | 3.28775e-35 | 1.000000 |
| rad31          | 3.79763e-36 | 1.000000 | 3.79763e-36 | 1.000000 |
| rad33          | 4.67670e-37 | 1.000000 | 4.67670e-37 | 1.000000 |
| rad5           | 3.43977e-37 | 1.000000 | 3.43977e-37 | 1.000000 |
| rad15          | 2.33632e-37 | 1.000000 | 2.33632e-37 | 1.000000 |
| rad19syn       | 7.83212e-40 | 1.000000 | 7.83212e-40 | 1.000000 |
| rad23          | 8.56081e-41 | 1.000000 | 8.56081e-41 | 1.000000 |
| rad20          | 4.99189e-41 | 1.000000 | 4.99189e-41 | 1.000000 |
| rad21          | 4.37014e-41 | 1.000000 | 4.37014e-41 | 1.000000 |
| rad12          | 9.00062e-42 | 1.000000 | 9.00062e-42 | 1.000000 |
| rad45          | 5.68829e-43 | 1.000000 | 5.68829e-43 | 1.000000 |
| rad18          | 2.06308e-43 | 1.000000 | 2.06308e-43 | 1.000000 |
| rad36          | 3.52233e-44 | 1.000000 | 3.52233e-44 | 1.000000 |
| rad22          | 8.63369e-45 | 1.000000 | 8.63369e-45 | 1.000000 |
| rad24          | 3.99735e-46 | 1.000000 | 3.99735e-46 | 1.000000 |
| rad8           | 8.12781e-63 | 1.000000 | 8.12781e-63 | 1.000000 |

0.100000000E-04 Pa, 200.000000 K

=====

| Rate constant             | True (fraction)        | Effective (fraction)   |
|---------------------------|------------------------|------------------------|
| Total                     | 1.52621e-14 (1.00 )    | 1.52621e-14 (1.00 )    |
| Formation of rad19        | 1.52610e-14 (1.000 )   | 1.52610e-14 (1.000 )   |
| H-abstraction to cyc2enyl | 1.06427e-18 (6.97e-05) | 1.06427e-18 (6.97e-05) |
| H-abstraction to cyclenyl | 2.46309e-22 (1.61e-08) | 2.46309e-22 (1.61e-08) |

| species                       | PYtrue      | Cumul    | PYeffective | Cumul    |
|-------------------------------|-------------|----------|-------------|----------|
| Indene+H                      | 0.999565    | 0.999565 | 0.999565    | 0.999565 |
| PhCHCCH2+H                    | 0.000345433 | 0.999911 | 0.000345433 | 0.999911 |
| Benzene+cycloprop-2-enylidene | 6.97330e-05 | 0.999980 | 6.97330e-05 | 0.999980 |
| PhCCH+CH3                     | 6.16243e-06 | 0.999987 | 6.16243e-06 | 0.999987 |
| C2H2+PhCH2                    | 4.87109e-06 | 0.999991 | 4.87109e-06 | 0.999991 |
| PhCCCH3+H                     | 3.65492e-06 | 0.999995 | 3.65492e-06 | 0.999995 |
| Ph+MeAc                       | 3.05169e-06 | 0.999998 | 3.05169e-06 | 0.999998 |

|                               |             |          |             |          |
|-------------------------------|-------------|----------|-------------|----------|
| rad67                         | 8.96414e-07 | 0.999999 | 8.96414e-07 | 0.999999 |
| rad35                         | 3.86641e-07 | 0.999999 | 3.86641e-07 | 0.999999 |
| Ph+Allene                     | 3.37775e-07 | 1.000000 | 3.37775e-07 | 1.000000 |
| PhCH2CCH+H                    | 4.78388e-08 | 1.000000 | 4.78388e-08 | 1.000000 |
| PAH7+H                        | 3.90323e-08 | 1.000000 | 3.90323e-08 | 1.000000 |
| Benzene+cycloprop-1-enylidene | 1.61386e-08 | 1.000000 | 1.61386e-08 | 1.000000 |
| rad39                         | 1.10085e-08 | 1.000000 | 1.10085e-08 | 1.000000 |
| rad37                         | 1.06172e-08 | 1.000000 | 1.06172e-08 | 1.000000 |
| rad30                         | 7.36603e-09 | 1.000000 | 7.36603e-09 | 1.000000 |
| PAH9+H                        | 5.82902e-10 | 1.000000 | 5.82902e-10 | 1.000000 |
| rad38                         | 2.68036e-10 | 1.000000 | 2.68036e-10 | 1.000000 |
| rad60syn                      | 4.15004e-11 | 1.000000 | 4.15004e-11 | 1.000000 |
| PAH10+CH3                     | 3.15724e-11 | 1.000000 | 3.15724e-11 | 1.000000 |
| PAH3+H                        | 2.30055e-11 | 1.000000 | 2.30055e-11 | 1.000000 |
| rad60anti                     | 2.07415e-11 | 1.000000 | 2.07415e-11 | 1.000000 |
| PhcycC3H3_A+H                 | 1.75314e-11 | 1.000000 | 1.75314e-11 | 1.000000 |
| rad46                         | 1.72300e-11 | 1.000000 | 1.72300e-11 | 1.000000 |
| rad59                         | 4.53088e-12 | 1.000000 | 4.53088e-12 | 1.000000 |
| rad43                         | 1.18504e-12 | 1.000000 | 1.18504e-12 | 1.000000 |
| rad54                         | 1.15325e-12 | 1.000000 | 1.15325e-12 | 1.000000 |
| rad62                         | 2.64143e-13 | 1.000000 | 2.64143e-13 | 1.000000 |
| Phenyl+cycC3H4                | 1.83626e-13 | 1.000000 | 0.00000     | 1.000000 |
| rad50                         | 1.83198e-13 | 1.000000 | 1.83198e-13 | 1.000000 |
| PhcycC3H3_B+H                 | 8.87690e-14 | 1.000000 | 8.87690e-14 | 1.000000 |
| rad70                         | 3.01009e-14 | 1.000000 | 3.01009e-14 | 1.000000 |
| rad55                         | 1.33495e-14 | 1.000000 | 1.33495e-14 | 1.000000 |
| PAH1+H                        | 1.21077e-14 | 1.000000 | 1.21077e-14 | 1.000000 |
| rad52                         | 1.67258e-15 | 1.000000 | 1.67258e-15 | 1.000000 |
| rad58                         | 9.13220e-16 | 1.000000 | 9.13220e-16 | 1.000000 |
| rad34                         | 6.67956e-16 | 1.000000 | 6.67956e-16 | 1.000000 |
| rad51                         | 6.33616e-16 | 1.000000 | 6.33616e-16 | 1.000000 |
| rad41                         | 1.57585e-16 | 1.000000 | 1.57585e-16 | 1.000000 |
| rad42                         | 1.06227e-16 | 1.000000 | 1.06227e-16 | 1.000000 |
| rad65                         | 1.53192e-17 | 1.000000 | 1.53192e-17 | 1.000000 |
| rad53                         | 9.61972e-19 | 1.000000 | 9.61972e-19 | 1.000000 |
| rad64                         | 2.21495e-19 | 1.000000 | 2.21495e-19 | 1.000000 |
| rad61                         | 2.60103e-20 | 1.000000 | 2.60103e-20 | 1.000000 |
| rad56                         | 1.46279e-21 | 1.000000 | 1.46279e-21 | 1.000000 |
| rad68syn                      | 1.59261e-22 | 1.000000 | 1.59261e-22 | 1.000000 |
| rad68anti                     | 1.23074e-22 | 1.000000 | 1.23074e-22 | 1.000000 |
| rad40syn                      | 6.17076e-25 | 1.000000 | 6.17076e-25 | 1.000000 |
| rad40anti                     | 4.95189e-25 | 1.000000 | 4.95189e-25 | 1.000000 |
| PAH8+H                        | 4.65852e-26 | 1.000000 | 4.65852e-26 | 1.000000 |
| rad73                         | 2.55582e-26 | 1.000000 | 2.55582e-26 | 1.000000 |
| rad6                          | 6.36771e-28 | 1.000000 | 6.36771e-28 | 1.000000 |
| rad71                         | 6.53613e-29 | 1.000000 | 6.53613e-29 | 1.000000 |
| rad26                         | 2.53200e-30 | 1.000000 | 2.53200e-30 | 1.000000 |
| rad28                         | 2.42359e-30 | 1.000000 | 2.42359e-30 | 1.000000 |
| rad2                          | 2.24436e-30 | 1.000000 | 2.24436e-30 | 1.000000 |
| rad19anti                     | 1.88665e-30 | 1.000000 | 1.88665e-30 | 1.000000 |
| rad47                         | 7.19641e-31 | 1.000000 | 7.19641e-31 | 1.000000 |
| rad1                          | 1.52074e-31 | 1.000000 | 1.52074e-31 | 1.000000 |
| rad10                         | 1.17425e-31 | 1.000000 | 1.17425e-31 | 1.000000 |
| rad7                          | 4.72242e-32 | 1.000000 | 4.72242e-32 | 1.000000 |
| rad3                          | 1.26095e-32 | 1.000000 | 1.26095e-32 | 1.000000 |
| rad11                         | 1.16239e-32 | 1.000000 | 1.16239e-32 | 1.000000 |
| rad4                          | 6.48350e-33 | 1.000000 | 6.48350e-33 | 1.000000 |
| rad9                          | 6.85423e-34 | 1.000000 | 6.85423e-34 | 1.000000 |
| rad13                         | 2.65339e-34 | 1.000000 | 2.65339e-34 | 1.000000 |
| rad14                         | 2.42324e-34 | 1.000000 | 2.42324e-34 | 1.000000 |
| rad25                         | 1.42900e-34 | 1.000000 | 1.42900e-34 | 1.000000 |
| rad27                         | 3.49985e-35 | 1.000000 | 3.49985e-35 | 1.000000 |
| rad31                         | 8.89692e-36 | 1.000000 | 8.89692e-36 | 1.000000 |
| rad33                         | 5.12969e-37 | 1.000000 | 5.12969e-37 | 1.000000 |
| rad5                          | 3.19586e-37 | 1.000000 | 3.19586e-37 | 1.000000 |
| rad15                         | 3.04185e-37 | 1.000000 | 3.04185e-37 | 1.000000 |
| rad19syn                      | 2.51002e-39 | 1.000000 | 2.51002e-39 | 1.000000 |
| rad23                         | 2.36048e-40 | 1.000000 | 2.36048e-40 | 1.000000 |
| rad20                         | 6.08405e-41 | 1.000000 | 6.08405e-41 | 1.000000 |
| rad21                         | 5.38428e-41 | 1.000000 | 5.38428e-41 | 1.000000 |
| rad12                         | 1.38070e-41 | 1.000000 | 1.38070e-41 | 1.000000 |
| rad45                         | 1.58502e-42 | 1.000000 | 1.58502e-42 | 1.000000 |
| rad18                         | 2.26453e-43 | 1.000000 | 2.26453e-43 | 1.000000 |
| rad36                         | 9.84255e-44 | 1.000000 | 9.84255e-44 | 1.000000 |
| rad22                         | 1.72719e-44 | 1.000000 | 1.72719e-44 | 1.000000 |
| rad24                         | 5.82218e-46 | 1.000000 | 5.82218e-46 | 1.000000 |
| rad8                          | 1.36072e-62 | 1.000000 | 1.36072e-62 | 1.000000 |

0.100000000E-04 Pa, 210.00000 K

=====



| Rate constant             | True (fraction)        | Effective (fraction)   |
|---------------------------|------------------------|------------------------|
| Total                     | 1.74272e-14 (1.00 )    | 1.74272e-14 (1.00 )    |
| Formation of rad19        | 1.74253e-14 (1.000 )   | 1.74253e-14 (1.000 )   |
| H-abstraction to cyc2enyl | 1.89310e-18 (0.000109) | 1.89310e-18 (0.000109) |
| H-abstraction to cyc1enyl | 6.66714e-22 (3.83e-08) | 6.66714e-22 (3.83e-08) |

| species                       | PYtrue      | Cumul    | PYeffective | Cumul    |
|-------------------------------|-------------|----------|-------------|----------|
| Indene+H                      | 0.999511    | 0.999511 | 0.999511    | 0.999511 |
| PhCHCCH2+H                    | 0.000359771 | 0.999871 | 0.000359771 | 0.999871 |
| Benzene+cycloprop-2-enylidene | 0.000108629 | 0.999980 | 0.000108629 | 0.999980 |
| PhCCH+CH3                     | 6.42954e-06 | 0.999986 | 6.42954e-06 | 0.999986 |
| C2H2+PhCH2                    | 5.13705e-06 | 0.999991 | 5.13705e-06 | 0.999991 |
| PhCCCH3+H                     | 3.83397e-06 | 0.999995 | 3.83397e-06 | 0.999995 |
| Ph+MeAc                       | 3.23682e-06 | 0.999998 | 3.23682e-06 | 0.999998 |
| rad67                         | 9.48433e-07 | 0.999999 | 9.48433e-07 | 0.999999 |
| rad35                         | 4.08123e-07 | 1.000000 | 4.08123e-07 | 1.000000 |
| Ph+Allene                     | 3.66908e-07 | 1.000000 | 3.66908e-07 | 1.000000 |
| PhCH2CCH+H                    | 5.27181e-08 | 1.000000 | 5.27181e-08 | 1.000000 |
| PAH7+H                        | 4.18516e-08 | 1.000000 | 4.18516e-08 | 1.000000 |
| Benzene+cycloprop-1-enylidene | 3.82571e-08 | 1.000000 | 3.82571e-08 | 1.000000 |
| rad39                         | 1.18003e-08 | 1.000000 | 1.18003e-08 | 1.000000 |
| rad37                         | 1.14322e-08 | 1.000000 | 1.14322e-08 | 1.000000 |
| rad30                         | 7.79386e-09 | 1.000000 | 7.79386e-09 | 1.000000 |
| PAH9+H                        | 6.28582e-10 | 1.000000 | 6.28582e-10 | 1.000000 |
| rad38                         | 2.91718e-10 | 1.000000 | 2.91718e-10 | 1.000000 |
| rad60syn                      | 4.50097e-11 | 1.000000 | 4.50097e-11 | 1.000000 |
| PAH10+CH3                     | 3.69848e-11 | 1.000000 | 3.69848e-11 | 1.000000 |
| PAH3+H                        | 2.57613e-11 | 1.000000 | 2.57613e-11 | 1.000000 |
| PhcycC3H3_A+H                 | 2.31914e-11 | 1.000000 | 2.31914e-11 | 1.000000 |
| rad60anti                     | 2.25454e-11 | 1.000000 | 2.25454e-11 | 1.000000 |
| rad46                         | 1.88621e-11 | 1.000000 | 1.88621e-11 | 1.000000 |
| rad59                         | 5.04686e-12 | 1.000000 | 5.04686e-12 | 1.000000 |
| rad43                         | 1.35708e-12 | 1.000000 | 1.35708e-12 | 1.000000 |
| rad54                         | 1.34969e-12 | 1.000000 | 1.34969e-12 | 1.000000 |
| rad62                         | 3.02921e-13 | 1.000000 | 3.02921e-13 | 1.000000 |
| Phenyl+cycC3H4                | 2.70226e-13 | 1.000000 | 0.000000    | 1.000000 |
| rad50                         | 2.10210e-13 | 1.000000 | 2.10210e-13 | 1.000000 |
| PhcycC3H3_B+H                 | 1.51586e-13 | 1.000000 | 1.51586e-13 | 1.000000 |
| rad70                         | 3.68945e-14 | 1.000000 | 3.68945e-14 | 1.000000 |
| rad55                         | 1.63587e-14 | 1.000000 | 1.63587e-14 | 1.000000 |
| PAH1+H                        | 1.57712e-14 | 1.000000 | 1.57712e-14 | 1.000000 |
| rad52                         | 1.98838e-15 | 1.000000 | 1.98838e-15 | 1.000000 |
| rad58                         | 1.14364e-15 | 1.000000 | 1.14364e-15 | 1.000000 |
| rad34                         | 8.73662e-16 | 1.000000 | 8.73662e-16 | 1.000000 |
| rad51                         | 7.85266e-16 | 1.000000 | 7.85266e-16 | 1.000000 |
| rad41                         | 2.13280e-16 | 1.000000 | 2.13280e-16 | 1.000000 |
| rad42                         | 1.39947e-16 | 1.000000 | 1.39947e-16 | 1.000000 |
| rad65                         | 1.92990e-17 | 1.000000 | 1.92990e-17 | 1.000000 |
| rad53                         | 1.63949e-18 | 1.000000 | 1.63949e-18 | 1.000000 |
| rad64                         | 4.08413e-19 | 1.000000 | 4.08413e-19 | 1.000000 |
| rad61                         | 6.05363e-20 | 1.000000 | 6.05363e-20 | 1.000000 |
| rad56                         | 3.74745e-21 | 1.000000 | 3.74745e-21 | 1.000000 |
| rad68syn                      | 4.25367e-22 | 1.000000 | 4.25367e-22 | 1.000000 |
| rad68anti                     | 3.26442e-22 | 1.000000 | 3.26442e-22 | 1.000000 |
| rad40syn                      | 2.29907e-24 | 1.000000 | 2.29907e-24 | 1.000000 |
| rad40anti                     | 1.84461e-24 | 1.000000 | 1.84461e-24 | 1.000000 |
| PAH8+H                        | 2.19678e-25 | 1.000000 | 2.19678e-25 | 1.000000 |
| rad73                         | 9.27902e-26 | 1.000000 | 9.27902e-26 | 1.000000 |
| rad6                          | 7.68506e-28 | 1.000000 | 7.68506e-28 | 1.000000 |
| rad71                         | 3.39170e-28 | 1.000000 | 3.39170e-28 | 1.000000 |
| rad19anti                     | 5.76793e-30 | 1.000000 | 5.76793e-30 | 1.000000 |
| rad2                          | 3.77501e-30 | 1.000000 | 3.77501e-30 | 1.000000 |
| rad26                         | 2.73178e-30 | 1.000000 | 2.73178e-30 | 1.000000 |
| rad28                         | 2.37981e-30 | 1.000000 | 2.37981e-30 | 1.000000 |
| rad47                         | 7.72085e-31 | 1.000000 | 7.72085e-31 | 1.000000 |
| rad1                          | 2.57920e-31 | 1.000000 | 2.57920e-31 | 1.000000 |
| rad10                         | 1.97777e-31 | 1.000000 | 1.97777e-31 | 1.000000 |
| rad7                          | 5.71225e-32 | 1.000000 | 5.71225e-32 | 1.000000 |
| rad3                          | 2.08775e-32 | 1.000000 | 2.08775e-32 | 1.000000 |
| rad11                         | 1.40669e-32 | 1.000000 | 1.40669e-32 | 1.000000 |
| rad4                          | 1.07591e-32 | 1.000000 | 1.07591e-32 | 1.000000 |
| rad9                          | 9.22128e-34 | 1.000000 | 9.22128e-34 | 1.000000 |
| rad13                         | 3.21477e-34 | 1.000000 | 3.21477e-34 | 1.000000 |
| rad14                         | 2.49459e-34 | 1.000000 | 2.49459e-34 | 1.000000 |
| rad25                         | 1.48937e-34 | 1.000000 | 1.48937e-34 | 1.000000 |
| rad27                         | 3.78432e-35 | 1.000000 | 3.78432e-35 | 1.000000 |
| rad31                         | 2.17530e-35 | 1.000000 | 2.17530e-35 | 1.000000 |
| rad33                         | 6.22524e-37 | 1.000000 | 6.22524e-37 | 1.000000 |

|          |             |         |             |         |
|----------|-------------|---------|-------------|---------|
| rad15    | 4.10110e-37 | 1.00000 | 4.10110e-37 | 1.00000 |
| rad5     | 2.98245e-37 | 1.00000 | 2.98245e-37 | 1.00000 |
| rad19syn | 8.46110e-39 | 1.00000 | 8.46110e-39 | 1.00000 |
| rad23    | 7.10823e-40 | 1.00000 | 7.10823e-40 | 1.00000 |
| rad20    | 7.53868e-41 | 1.00000 | 7.53868e-41 | 1.00000 |
| rad21    | 6.74387e-41 | 1.00000 | 6.74387e-41 | 1.00000 |
| rad12    | 2.19716e-41 | 1.00000 | 2.19716e-41 | 1.00000 |
| rad45    | 4.84061e-42 | 1.00000 | 4.84061e-42 | 1.00000 |
| rad36    | 3.01565e-43 | 1.00000 | 3.01565e-43 | 1.00000 |
| rad18    | 2.51732e-43 | 1.00000 | 2.51732e-43 | 1.00000 |
| rad22    | 4.26792e-44 | 1.00000 | 4.26792e-44 | 1.00000 |
| rad24    | 8.64901e-46 | 1.00000 | 8.64901e-46 | 1.00000 |
| rad8     | 2.32606e-62 | 1.00000 | 2.32606e-62 | 1.00000 |

0.100000000E-04 Pa, 220.000000 K

| Rate constant             | True (fraction)        | Effective (fraction)   |
|---------------------------|------------------------|------------------------|
| Total                     | 1.97009e-14 (1.00 )    | 1.97009e-14 (1.00 )    |
| Formation of rad19        | 1.96977e-14 (1.000 )   | 1.96977e-14 (1.000 )   |
| H-abstraction to cyc2enyl | 3.19064e-18 (0.000162) | 3.19064e-18 (0.000162) |
| H-abstraction to cyclenyl | 1.64627e-21 (8.36e-08) | 1.64627e-21 (8.36e-08) |

| species                       | PYtrue      | Cumul    | PYeffective | Cumul    |
|-------------------------------|-------------|----------|-------------|----------|
| Indene+H                      | 0.999441    | 0.999441 | 0.999441    | 0.999441 |
| PhCHCCH2+H                    | 0.000375424 | 0.999816 | 0.000375424 | 0.999816 |
| Benzene+cycloprop-2-enylidene | 0.000161954 | 0.999978 | 0.000161954 | 0.999978 |
| PhCCH+CH3                     | 6.72039e-06 | 0.999985 | 6.72039e-06 | 0.999985 |
| C2H2+PhCH2                    | 5.43098e-06 | 0.999991 | 5.43098e-06 | 0.999991 |
| PhCCCH3+H                     | 4.03052e-06 | 0.999995 | 4.03052e-06 | 0.999995 |
| Ph+MeAc                       | 3.44236e-06 | 0.999998 | 3.44236e-06 | 0.999998 |
| rad67                         | 1.00612e-06 | 0.999999 | 1.00612e-06 | 0.999999 |
| rad35                         | 4.31892e-07 | 0.999999 | 4.31892e-07 | 0.999999 |
| Ph+Allene                     | 4.00151e-07 | 1.000000 | 4.00151e-07 | 1.000000 |
| Benzene+cycloprop-1-enylidene | 8.35632e-08 | 1.000000 | 8.35632e-08 | 1.000000 |
| PhCH2CCH+H                    | 5.83684e-08 | 1.000000 | 5.83684e-08 | 1.000000 |
| PAH7+H                        | 4.50238e-08 | 1.000000 | 4.50238e-08 | 1.000000 |
| rad39                         | 1.26902e-08 | 1.000000 | 1.26902e-08 | 1.000000 |
| rad37                         | 1.23532e-08 | 1.000000 | 1.23532e-08 | 1.000000 |
| rad30                         | 8.26934e-09 | 1.000000 | 8.26934e-09 | 1.000000 |
| PAH9+H                        | 6.80448e-10 | 1.000000 | 6.80448e-10 | 1.000000 |
| rad38                         | 3.18911e-10 | 1.000000 | 3.18911e-10 | 1.000000 |
| rad60syn                      | 4.90141e-11 | 1.000000 | 4.90141e-11 | 1.000000 |
| PAH10+CH3                     | 4.36275e-11 | 1.000000 | 4.36275e-11 | 1.000000 |
| PhcycC3H3_A+H                 | 3.07931e-11 | 1.000000 | 3.07931e-11 | 1.000000 |
| PAH3+H                        | 2.90111e-11 | 1.000000 | 2.90111e-11 | 1.000000 |
| rad60anti                     | 2.46085e-11 | 1.000000 | 2.46085e-11 | 1.000000 |
| rad46                         | 2.07451e-11 | 1.000000 | 2.07451e-11 | 1.000000 |
| rad59                         | 5.65179e-12 | 1.000000 | 5.65179e-12 | 1.000000 |
| rad54                         | 1.59075e-12 | 1.000000 | 1.59075e-12 | 1.000000 |
| rad43                         | 1.56310e-12 | 1.000000 | 1.56310e-12 | 1.000000 |
| Phenyl+cycC3H4                | 3.96956e-13 | 1.000000 | 0.000000    | 1.000000 |
| rad62                         | 3.49289e-13 | 1.000000 | 3.49289e-13 | 1.000000 |
| PhcycC3H3_B+H                 | 2.54101e-13 | 1.000000 | 2.54101e-13 | 1.000000 |
| rad50                         | 2.42929e-13 | 1.000000 | 2.42929e-13 | 1.000000 |
| rad70                         | 4.55815e-14 | 1.000000 | 4.55815e-14 | 1.000000 |
| PAH1+H                        | 2.06978e-14 | 1.000000 | 2.06978e-14 | 1.000000 |
| rad55                         | 2.02024e-14 | 1.000000 | 2.02024e-14 | 1.000000 |
| rad52                         | 2.38419e-15 | 1.000000 | 2.38419e-15 | 1.000000 |
| rad58                         | 1.44438e-15 | 1.000000 | 1.44438e-15 | 1.000000 |
| rad34                         | 1.15142e-15 | 1.000000 | 1.15142e-15 | 1.000000 |
| rad51                         | 9.82813e-16 | 1.000000 | 9.82813e-16 | 1.000000 |
| rad41                         | 2.89888e-16 | 1.000000 | 2.89888e-16 | 1.000000 |
| rad42                         | 1.85167e-16 | 1.000000 | 1.85167e-16 | 1.000000 |
| rad65                         | 2.45505e-17 | 1.000000 | 2.45505e-17 | 1.000000 |
| rad53                         | 2.75829e-18 | 1.000000 | 2.75829e-18 | 1.000000 |
| rad64                         | 7.36242e-19 | 1.000000 | 7.36242e-19 | 1.000000 |
| rad61                         | 1.34204e-19 | 1.000000 | 1.34204e-19 | 1.000000 |
| rad56                         | 9.05590e-21 | 1.000000 | 9.05590e-21 | 1.000000 |
| rad68syn                      | 1.06496e-21 | 1.000000 | 1.06496e-21 | 1.000000 |
| rad68anti                     | 8.11645e-22 | 1.000000 | 8.11645e-22 | 1.000000 |
| rad40syn                      | 7.73817e-24 | 1.000000 | 7.73817e-24 | 1.000000 |
| rad40anti                     | 6.20298e-24 | 1.000000 | 6.20298e-24 | 1.000000 |
| PAH8+H                        | 9.11871e-25 | 1.000000 | 9.11871e-25 | 1.000000 |
| rad73                         | 3.07722e-25 | 1.000000 | 3.07722e-25 | 1.000000 |
| rad71                         | 1.53451e-27 | 1.000000 | 1.53451e-27 | 1.000000 |
| rad6                          | 1.03795e-27 | 1.000000 | 1.03795e-27 | 1.000000 |
| rad19anti                     | 1.83731e-29 | 1.000000 | 1.83731e-29 | 1.000000 |
| rad2                          | 6.70262e-30 | 1.000000 | 6.70262e-30 | 1.000000 |

|          |             |         |             |         |
|----------|-------------|---------|-------------|---------|
| rad26    | 3.18451e-30 | 1.00000 | 3.18451e-30 | 1.00000 |
| rad28    | 2.49434e-30 | 1.00000 | 2.49434e-30 | 1.00000 |
| rad47    | 8.39992e-31 | 1.00000 | 8.39992e-31 | 1.00000 |
| rad1     | 4.62083e-31 | 1.00000 | 4.62083e-31 | 1.00000 |
| rad10    | 3.51820e-31 | 1.00000 | 3.51820e-31 | 1.00000 |
| rad7     | 7.73293e-32 | 1.00000 | 7.73293e-32 | 1.00000 |
| rad3     | 3.64498e-32 | 1.00000 | 3.64498e-32 | 1.00000 |
| rad11    | 1.90521e-32 | 1.00000 | 1.90521e-32 | 1.00000 |
| rad4     | 1.88308e-32 | 1.00000 | 1.88308e-32 | 1.00000 |
| rad9     | 1.30282e-33 | 1.00000 | 1.30282e-33 | 1.00000 |
| rad13    | 4.35940e-34 | 1.00000 | 4.35940e-34 | 1.00000 |
| rad14    | 2.59426e-34 | 1.00000 | 2.59426e-34 | 1.00000 |
| rad25    | 1.56225e-34 | 1.00000 | 1.56225e-34 | 1.00000 |
| rad31    | 5.54371e-35 | 1.00000 | 5.54371e-35 | 1.00000 |
| rad27    | 4.17733e-35 | 1.00000 | 4.17733e-35 | 1.00000 |
| rad33    | 8.44942e-37 | 1.00000 | 8.44942e-37 | 1.00000 |
| rad15    | 5.80704e-37 | 1.00000 | 5.80704e-37 | 1.00000 |
| rad5     | 2.79418e-37 | 1.00000 | 2.79418e-37 | 1.00000 |
| rad19syn | 2.99699e-38 | 1.00000 | 2.99699e-38 | 1.00000 |
| rad23    | 2.33068e-39 | 1.00000 | 2.33068e-39 | 1.00000 |
| rad20    | 9.50986e-41 | 1.00000 | 9.50986e-41 | 1.00000 |
| rad21    | 8.59648e-41 | 1.00000 | 8.59648e-41 | 1.00000 |
| rad12    | 3.63114e-41 | 1.00000 | 3.63114e-41 | 1.00000 |
| rad45    | 1.61577e-41 | 1.00000 | 1.61577e-41 | 1.00000 |
| rad36    | 1.01034e-42 | 1.00000 | 1.01034e-42 | 1.00000 |
| rad18    | 2.84453e-43 | 1.00000 | 2.84453e-43 | 1.00000 |
| rad22    | 1.23106e-43 | 1.00000 | 1.23106e-43 | 1.00000 |
| rad24    | 1.31091e-45 | 1.00000 | 1.31091e-45 | 1.00000 |
| rad8     | 4.06074e-62 | 1.00000 | 4.06074e-62 | 1.00000 |

0.100000000E-04 Pa, 230.000000 K

| Rate constant                 | True (fraction)        | Effective (fraction)   |             |          |
|-------------------------------|------------------------|------------------------|-------------|----------|
| Total                         | 2.20761e-14 (1.00 )    | 2.20761e-14 (1.00 )    |             |          |
| Formation of rad19            | 2.20710e-14 (1.000 )   | 2.20710e-14 (1.000 )   |             |          |
| H-abstraction to cyc2enyl     | 5.13155e-18 (0.000232) | 5.13155e-18 (0.000232) |             |          |
| H-abstraction to cyclenyl     | 3.75316e-21 (1.70e-07) | 3.75316e-21 (1.70e-07) |             |          |
| species                       | PYtrue                 | Cumul                  | PYeffective | Cumul    |
| Indene+H                      | 0.999352               | 0.999352               | 0.999352    | 0.999352 |
| PhCHCCH2+H                    | 0.000392520            | 0.999745               | 0.000392520 | 0.999745 |
| Benzene+cycloprop-2-enylidene | 0.000232448            | 0.999977               | 0.000232448 | 0.999977 |
| PhCCH+CH3                     | 7.03712e-06            | 0.999984               | 7.03712e-06 | 0.999984 |
| C2H2+PhCH2                    | 5.75601e-06            | 0.999990               | 5.75601e-06 | 0.999990 |
| PhCCCH3+H                     | 4.24633e-06            | 0.999994               | 4.24633e-06 | 0.999994 |
| Ph+MeAc                       | 3.67074e-06            | 0.999998               | 3.67074e-06 | 0.999998 |
| rad67                         | 1.07014e-06            | 0.999999               | 1.07014e-06 | 0.999999 |
| rad35                         | 4.58209e-07            | 1.000000               | 4.58209e-07 | 1.000000 |
| Ph+Allene                     | 4.38150e-07            | 1.000000               | 4.38150e-07 | 1.000000 |
| Benzene+cycloprop-1-enylidene | 1.70010e-07            | 1.000000               | 1.70010e-07 | 1.000000 |
| PhCH2CCH+H                    | 6.49255e-08            | 1.000000               | 6.49255e-08 | 1.000000 |
| PAH7+H                        | 4.85973e-08            | 1.000000               | 4.85973e-08 | 1.000000 |
| rad39                         | 1.36916e-08            | 1.000000               | 1.36916e-08 | 1.000000 |
| rad37                         | 1.33953e-08            | 1.000000               | 1.33953e-08 | 1.000000 |
| rad30                         | 8.79825e-09            | 1.000000               | 8.79825e-09 | 1.000000 |
| PAH9+H                        | 7.39443e-10            | 1.000000               | 7.39443e-10 | 1.000000 |
| rad38                         | 3.50209e-10            | 1.000000               | 3.50209e-10 | 1.000000 |
| rad60syn                      | 5.35915e-11            | 1.000000               | 5.35915e-11 | 1.000000 |
| PAH10+CH3                     | 5.18070e-11            | 1.000000               | 5.18070e-11 | 1.000000 |
| PhcycC3H3_A+H                 | 4.10038e-11            | 1.000000               | 4.10038e-11 | 1.000000 |
| PAH3+H                        | 3.28545e-11            | 1.000000               | 3.28545e-11 | 1.000000 |
| rad60anti                     | 2.69725e-11            | 1.000000               | 2.69725e-11 | 1.000000 |
| rad46                         | 2.29232e-11            | 1.000000               | 2.29232e-11 | 1.000000 |
| rad59                         | 6.36288e-12            | 1.000000               | 6.36288e-12 | 1.000000 |
| rad54                         | 1.88753e-12            | 1.000000               | 1.88753e-12 | 1.000000 |
| rad43                         | 1.81040e-12            | 1.000000               | 1.81040e-12 | 1.000000 |
| Phenyl+cycC3H4                | 5.81829e-13            | 1.000000               | 0.000000    | 1.000000 |
| PhcycC3H3_B+H                 | 4.18958e-13            | 1.000000               | 4.18958e-13 | 1.000000 |
| rad62                         | 4.04843e-13            | 1.000000               | 4.04843e-13 | 1.000000 |
| rad50                         | 2.82714e-13            | 1.000000               | 2.82714e-13 | 1.000000 |
| rad70                         | 5.67286e-14            | 1.000000               | 5.67286e-14 | 1.000000 |
| PAH1+H                        | 2.73411e-14            | 1.000000               | 2.73411e-14 | 1.000000 |
| rad55                         | 2.51283e-14            | 1.000000               | 2.51283e-14 | 1.000000 |
| rad52                         | 2.88262e-15            | 1.000000               | 2.88262e-15 | 1.000000 |
| rad58                         | 1.83842e-15            | 1.000000               | 1.83842e-15 | 1.000000 |
| rad34                         | 1.52751e-15            | 1.000000               | 1.52751e-15 | 1.000000 |
| rad51                         | 1.24149e-15            | 1.000000               | 1.24149e-15 | 1.000000 |
| rad41                         | 3.95307e-16            | 1.000000               | 3.95307e-16 | 1.000000 |

|           |             |         |             |         |
|-----------|-------------|---------|-------------|---------|
| rad42     | 2.45831e-16 | 1.00000 | 2.45831e-16 | 1.00000 |
| rad65     | 3.15147e-17 | 1.00000 | 3.15147e-17 | 1.00000 |
| rad53     | 4.58652e-18 | 1.00000 | 4.58652e-18 | 1.00000 |
| rad64     | 1.30089e-18 | 1.00000 | 1.30089e-18 | 1.00000 |
| rad61     | 2.85229e-19 | 1.00000 | 2.85229e-19 | 1.00000 |
| rad56     | 2.08059e-20 | 1.00000 | 2.08059e-20 | 1.00000 |
| rad68syn  | 2.52166e-21 | 1.00000 | 2.52166e-21 | 1.00000 |
| rad68anti | 1.90889e-21 | 1.00000 | 1.90889e-21 | 1.00000 |
| rad40syn  | 2.38315e-23 | 1.00000 | 2.38315e-23 | 1.00000 |
| rad40anti | 1.90761e-23 | 1.00000 | 1.90761e-23 | 1.00000 |
| PAH8+H    | 3.38041e-24 | 1.00000 | 3.38041e-24 | 1.00000 |
| rad73     | 9.42054e-25 | 1.00000 | 9.42054e-25 | 1.00000 |
| rad71     | 6.14189e-27 | 1.00000 | 6.14189e-27 | 1.00000 |
| rad6      | 1.57378e-27 | 1.00000 | 1.57378e-27 | 1.00000 |
| rad19anti | 6.07591e-29 | 1.00000 | 6.07591e-29 | 1.00000 |
| rad2      | 1.24828e-29 | 1.00000 | 1.24828e-29 | 1.00000 |
| rad26     | 4.06306e-30 | 1.00000 | 4.06306e-30 | 1.00000 |
| rad28     | 2.85980e-30 | 1.00000 | 2.85980e-30 | 1.00000 |
| rad47     | 9.27306e-31 | 1.00000 | 9.27306e-31 | 1.00000 |
| rad1      | 8.69001e-31 | 1.00000 | 8.69001e-31 | 1.00000 |
| rad10     | 6.56471e-31 | 1.00000 | 6.56471e-31 | 1.00000 |
| rad7      | 1.17531e-31 | 1.00000 | 1.17531e-31 | 1.00000 |
| rad3      | 6.67578e-32 | 1.00000 | 6.67578e-32 | 1.00000 |
| rad4      | 3.45820e-32 | 1.00000 | 3.45820e-32 | 1.00000 |
| rad11     | 2.89712e-32 | 1.00000 | 2.89712e-32 | 1.00000 |
| rad9      | 1.98990e-33 | 1.00000 | 1.98990e-33 | 1.00000 |
| rad13     | 6.63763e-34 | 1.00000 | 6.63763e-34 | 1.00000 |
| rad14     | 2.73315e-34 | 1.00000 | 2.73315e-34 | 1.00000 |
| rad25     | 1.64949e-34 | 1.00000 | 1.64949e-34 | 1.00000 |
| rad31     | 1.47017e-34 | 1.00000 | 1.47017e-34 | 1.00000 |
| rad27     | 4.74567e-35 | 1.00000 | 4.74567e-35 | 1.00000 |
| rad33     | 1.28707e-36 | 1.00000 | 1.28707e-36 | 1.00000 |
| rad15     | 8.88981e-37 | 1.00000 | 8.88981e-37 | 1.00000 |
| rad5      | 2.62689e-37 | 1.00000 | 2.62689e-37 | 1.00000 |
| rad19syn  | 1.11381e-37 | 1.00000 | 1.11381e-37 | 1.00000 |
| rad23     | 8.28594e-39 | 1.00000 | 8.28594e-39 | 1.00000 |
| rad20     | 1.22515e-40 | 1.00000 | 1.22515e-40 | 1.00000 |
| rad21     | 1.11811e-40 | 1.00000 | 1.11811e-40 | 1.00000 |
| rad12     | 6.24922e-41 | 1.00000 | 6.24922e-41 | 1.00000 |
| rad45     | 5.86974e-41 | 1.00000 | 5.86974e-41 | 1.00000 |
| rad36     | 3.68572e-42 | 1.00000 | 3.68572e-42 | 1.00000 |
| rad22     | 3.97205e-43 | 1.00000 | 3.97205e-43 | 1.00000 |
| rad18     | 3.29279e-43 | 1.00000 | 3.29279e-43 | 1.00000 |
| rad24     | 2.02844e-45 | 1.00000 | 2.02844e-45 | 1.00000 |
| rad8      | 7.24169e-62 | 1.00000 | 7.24169e-62 | 1.00000 |

0.100000000E-04 Pa, 240.000000 K

| Rate constant             | True (fraction)        | Effective (fraction)   |
|---------------------------|------------------------|------------------------|
| Total                     | 2.45462e-14 (1.00 )    | 2.45462e-14 (1.00 )    |
| Formation of rad19        | 2.45383e-14 (1.000 )   | 2.45383e-14 (1.000 )   |
| H-abstraction to cyc2enyl | 7.92234e-18 (0.000323) | 7.92234e-18 (0.000323) |
| H-abstraction to cyclenyl | 7.97958e-21 (3.25e-07) | 7.97958e-21 (3.25e-07) |

| species                       | PYtrue      | Cumul    | PYeffective | Cumul    |
|-------------------------------|-------------|----------|-------------|----------|
| Indene+H                      | 0.999241    | 0.999241 | 0.999241    | 0.999241 |
| PhCHCCH2+H                    | 0.000411192 | 0.999652 | 0.000411192 | 0.999652 |
| Benzene+cycloprop-2-enylidene | 0.000322752 | 0.999975 | 0.000322752 | 0.999975 |
| PhCCH+CH3                     | 7.38194e-06 | 0.999982 | 7.38194e-06 | 0.999982 |
| C2H2+PhCH2                    | 6.11553e-06 | 0.999989 | 6.11553e-06 | 0.999989 |
| PhCCCH3+H                     | 4.48334e-06 | 0.999993 | 4.48334e-06 | 0.999993 |
| Ph+MeAc                       | 3.92459e-06 | 0.999997 | 3.92459e-06 | 0.999997 |
| rad67                         | 1.14122e-06 | 0.999998 | 1.14122e-06 | 0.999998 |
| rad35                         | 4.87362e-07 | 0.999999 | 4.87362e-07 | 0.999999 |
| Ph+Allene                     | 4.81641e-07 | 0.999999 | 4.81641e-07 | 0.999999 |
| Benzene+cycloprop-1-enylidene | 3.25084e-07 | 0.999999 | 3.25084e-07 | 0.999999 |
| PhCH2CCH+H                    | 7.25479e-08 | 0.999999 | 7.25479e-08 | 0.999999 |
| PAH7+H                        | 5.26263e-08 | 0.999999 | 5.26263e-08 | 0.999999 |
| rad39                         | 1.48191e-08 | 0.999999 | 1.48191e-08 | 0.999999 |
| rad37                         | 1.45757e-08 | 1.000000 | 1.45757e-08 | 1.000000 |
| rad30                         | 9.38702e-09 | 1.000000 | 9.38702e-09 | 1.000000 |
| PAH9+H                        | 8.06648e-10 | 1.000000 | 8.06648e-10 | 1.000000 |
| rad38                         | 3.86297e-10 | 1.000000 | 3.86297e-10 | 1.000000 |
| PAH10+CH3                     | 6.19064e-11 | 1.000000 | 6.19064e-11 | 1.000000 |
| rad60syn                      | 5.88324e-11 | 1.000000 | 5.88324e-11 | 1.000000 |
| PhcycC3H3_A+H                 | 5.47108e-11 | 1.000000 | 5.47108e-11 | 1.000000 |
| PAH3+H                        | 3.74113e-11 | 1.000000 | 3.74113e-11 | 1.000000 |
| rad60anti                     | 2.96857e-11 | 1.000000 | 2.96857e-11 | 1.000000 |

|                |             |          |             |          |
|----------------|-------------|----------|-------------|----------|
| rad46          | 2.54474e-11 | 1.000000 | 2.54474e-11 | 1.000000 |
| rad59          | 7.20068e-12 | 1.000000 | 7.20068e-12 | 1.000000 |
| rad54          | 2.25392e-12 | 1.000000 | 2.25392e-12 | 1.000000 |
| rad43          | 2.10782e-12 | 1.000000 | 2.10782e-12 | 1.000000 |
| Phenyl+cycC3H4 | 8.50545e-13 | 1.000000 | 0.00000     | 1.000000 |
| PhcycC3H3_B+H  | 6.80482e-13 | 1.000000 | 6.80482e-13 | 1.000000 |
| rad62          | 4.71505e-13 | 1.000000 | 4.71505e-13 | 1.000000 |
| rad50          | 3.31266e-13 | 1.000000 | 3.31266e-13 | 1.000000 |
| rad70          | 7.10726e-14 | 1.000000 | 7.10726e-14 | 1.000000 |
| PAH1+H         | 3.63163e-14 | 1.000000 | 3.63163e-14 | 1.000000 |
| rad55          | 3.14579e-14 | 1.000000 | 3.14579e-14 | 1.000000 |
| rad52          | 3.51289e-15 | 1.000000 | 3.51289e-15 | 1.000000 |
| rad58          | 2.35637e-15 | 1.000000 | 2.35637e-15 | 1.000000 |
| rad34          | 2.03778e-15 | 1.000000 | 2.03778e-15 | 1.000000 |
| rad51          | 1.58177e-15 | 1.000000 | 1.58177e-15 | 1.000000 |
| rad41          | 5.40331e-16 | 1.000000 | 5.40331e-16 | 1.000000 |
| rad42          | 3.27191e-16 | 1.000000 | 3.27191e-16 | 1.000000 |
| rad65          | 4.07883e-17 | 1.000000 | 4.07883e-17 | 1.000000 |
| rad53          | 7.54385e-18 | 1.000000 | 7.54385e-18 | 1.000000 |
| rad64          | 2.25729e-18 | 1.000000 | 2.25729e-18 | 1.000000 |
| rad61          | 5.84088e-19 | 1.000000 | 5.84088e-19 | 1.000000 |
| rad56          | 4.57231e-20 | 1.000000 | 4.57231e-20 | 1.000000 |
| rad68syn       | 5.68636e-21 | 1.000000 | 5.68636e-21 | 1.000000 |
| rad68anti      | 4.27665e-21 | 1.000000 | 4.27665e-21 | 1.000000 |
| rad40syn       | 6.78314e-23 | 1.000000 | 6.78314e-23 | 1.000000 |
| rad40anti      | 5.41986e-23 | 1.000000 | 5.41986e-23 | 1.000000 |
| PAH8+H         | 1.13224e-23 | 1.000000 | 1.13224e-23 | 1.000000 |
| rad73          | 2.68346e-24 | 1.000000 | 2.68346e-24 | 1.000000 |
| rad71          | 2.20097e-26 | 1.000000 | 2.20097e-26 | 1.000000 |
| rad6           | 2.67484e-27 | 1.000000 | 2.67484e-27 | 1.000000 |
| rad19anti      | 2.07742e-28 | 1.000000 | 2.07742e-28 | 1.000000 |
| rad2           | 2.42951e-29 | 1.000000 | 2.42951e-29 | 1.000000 |
| rad26          | 5.69525e-30 | 1.000000 | 5.69525e-30 | 1.000000 |
| rad28          | 3.67170e-30 | 1.000000 | 3.67170e-30 | 1.000000 |
| rad1           | 1.70928e-30 | 1.000000 | 1.70928e-30 | 1.000000 |
| rad10          | 1.28018e-30 | 1.000000 | 1.28018e-30 | 1.000000 |
| rad47          | 1.03946e-30 | 1.000000 | 1.03946e-30 | 1.000000 |
| rad7           | 2.00252e-31 | 1.000000 | 2.00252e-31 | 1.000000 |
| rad3           | 1.27547e-31 | 1.000000 | 1.27547e-31 | 1.000000 |
| rad4           | 6.62661e-32 | 1.000000 | 6.62661e-32 | 1.000000 |
| rad11          | 4.93858e-32 | 1.000000 | 4.93858e-32 | 1.000000 |
| rad9           | 3.45148e-33 | 1.000000 | 3.45148e-33 | 1.000000 |
| rad13          | 1.13306e-33 | 1.000000 | 1.13306e-33 | 1.000000 |
| rad31          | 4.04874e-34 | 1.000000 | 4.04874e-34 | 1.000000 |
| rad14          | 2.93119e-34 | 1.000000 | 2.93119e-34 | 1.000000 |
| rad25          | 1.75401e-34 | 1.000000 | 1.75401e-34 | 1.000000 |
| rad27          | 5.61654e-35 | 1.000000 | 5.61654e-35 | 1.000000 |
| rad33          | 2.19783e-36 | 1.000000 | 2.19783e-36 | 1.000000 |
| rad15          | 1.54558e-36 | 1.000000 | 1.54558e-36 | 1.000000 |
| rad19syn       | 4.33470e-37 | 1.000000 | 4.33470e-37 | 1.000000 |
| rad5           | 2.47731e-37 | 1.000000 | 2.47731e-37 | 1.000000 |
| rad23          | 3.17799e-38 | 1.000000 | 3.17799e-38 | 1.000000 |
| rad45          | 2.31466e-40 | 1.000000 | 2.31466e-40 | 1.000000 |
| rad20          | 1.62235e-40 | 1.000000 | 1.62235e-40 | 1.000000 |
| rad21          | 1.49181e-40 | 1.000000 | 1.49181e-40 | 1.000000 |
| rad12          | 1.12614e-40 | 1.000000 | 1.12614e-40 | 1.000000 |
| rad36          | 1.46028e-41 | 1.000000 | 1.46028e-41 | 1.000000 |
| rad22          | 1.39841e-42 | 1.000000 | 1.39841e-42 | 1.000000 |
| rad18          | 3.96673e-43 | 1.000000 | 3.96673e-43 | 1.000000 |
| rad24          | 3.20758e-45 | 1.000000 | 3.20758e-45 | 1.000000 |
| rad8           | 1.31972e-61 | 1.000000 | 1.31972e-61 | 1.000000 |

0.100000000E-04 Pa, 250.000000 K

=====

| Rate constant             | True (fraction)        | Effective (fraction)   |
|---------------------------|------------------------|------------------------|
| Total                     | 2.71048e-14 (1.00 )    | 2.71048e-14 (1.00 )    |
| Formation of rad19        | 2.70930e-14 (1.000 )   | 2.70930e-14 (1.000 )   |
| H-abstraction to cyc2enyl | 1.17991e-17 (0.000435) | 1.17991e-17 (0.000435) |
| H-abstraction to cyclenyl | 1.59554e-20 (5.89e-07) | 1.59554e-20 (5.89e-07) |

| species                       | PYtrue      | Cumul    | PYeffective | Cumul    |
|-------------------------------|-------------|----------|-------------|----------|
| Indene+H                      | 0.999107    | 0.999107 | 0.999107    | 0.999107 |
| Benzene+cycloprop-2-enylidene | 0.000435312 | 0.999543 | 0.000435312 | 0.999543 |
| PhCHCCH2+H                    | 0.000431584 | 0.999974 | 0.000431584 | 0.999974 |
| PhCCH+CH3                     | 7.75719e-06 | 0.999982 | 7.75719e-06 | 0.999982 |
| C2H2+PhCH2                    | 6.51326e-06 | 0.999988 | 6.51326e-06 | 0.999988 |
| PhCCCH3+H                     | 4.74360e-06 | 0.999993 | 4.74360e-06 | 0.999993 |
| Ph+MeAc                       | 4.20682e-06 | 0.999997 | 4.20682e-06 | 0.999997 |

|                               |             |          |             |          |
|-------------------------------|-------------|----------|-------------|----------|
| rad67                         | 1.22017e-06 | 0.999999 | 1.22017e-06 | 0.999999 |
| Benzene+cycloprop-1-enylidene | 5.88656e-07 | 0.999999 | 5.88656e-07 | 0.999999 |
| Ph+Allene                     | 5.31473e-07 | 1.000000 | 5.31473e-07 | 1.000000 |
| rad35                         | 5.19665e-07 | 1.000000 | 5.19665e-07 | 1.000000 |
| PhCH2CCH+H                    | 8.14214e-08 | 1.000000 | 8.14214e-08 | 1.000000 |
| PAH7+H                        | 5.71716e-08 | 1.000000 | 5.71716e-08 | 1.000000 |
| rad39                         | 1.60894e-08 | 1.000000 | 1.60894e-08 | 1.000000 |
| rad37                         | 1.59138e-08 | 1.000000 | 1.59138e-08 | 1.000000 |
| rad30                         | 1.00427e-08 | 1.000000 | 1.00427e-08 | 1.000000 |
| PAH9+H                        | 8.83301e-10 | 1.000000 | 8.83301e-10 | 1.000000 |
| rad38                         | 4.27984e-10 | 1.000000 | 4.27984e-10 | 1.000000 |
| PAH10+CH3                     | 7.44048e-11 | 1.000000 | 7.44048e-11 | 1.000000 |
| PhcycC3H3_A+H                 | 7.30900e-11 | 1.000000 | 7.30900e-11 | 1.000000 |
| rad60syn                      | 6.48406e-11 | 1.000000 | 6.48406e-11 | 1.000000 |
| PAH3+H                        | 4.28259e-11 | 1.000000 | 4.28259e-11 | 1.000000 |
| rad60anti                     | 3.28040e-11 | 1.000000 | 3.28040e-11 | 1.000000 |
| rad46                         | 2.83781e-11 | 1.000000 | 2.83781e-11 | 1.000000 |
| rad59                         | 8.18974e-12 | 1.000000 | 8.18974e-12 | 1.000000 |
| rad54                         | 2.70727e-12 | 1.000000 | 2.70727e-12 | 1.000000 |
| rad43                         | 2.46610e-12 | 1.000000 | 2.46610e-12 | 1.000000 |
| Phenyl+cycC3H4                | 1.23952e-12 | 1.000000 | 0.000000    | 1.000000 |
| PhcycC3H3_B+H                 | 1.09005e-12 | 1.000000 | 1.09005e-12 | 1.000000 |
| rad62                         | 5.51586e-13 | 1.000000 | 5.51586e-13 | 1.000000 |
| rad50                         | 3.90700e-13 | 1.000000 | 3.90700e-13 | 1.000000 |
| rad70                         | 8.95707e-14 | 1.000000 | 8.95707e-14 | 1.000000 |
| PAH1+H                        | 4.84544e-14 | 1.000000 | 4.84544e-14 | 1.000000 |
| rad55                         | 3.96079e-14 | 1.000000 | 3.96079e-14 | 1.000000 |
| rad52                         | 4.31279e-15 | 1.000000 | 4.31279e-15 | 1.000000 |
| rad58                         | 3.03881e-15 | 1.000000 | 3.03881e-15 | 1.000000 |
| rad34                         | 2.73086e-15 | 1.000000 | 2.73086e-15 | 1.000000 |
| rad51                         | 2.03107e-15 | 1.000000 | 2.03107e-15 | 1.000000 |
| rad41                         | 7.39638e-16 | 1.000000 | 7.39638e-16 | 1.000000 |
| rad42                         | 4.36203e-16 | 1.000000 | 4.36203e-16 | 1.000000 |
| rad65                         | 5.31796e-17 | 1.000000 | 5.31796e-17 | 1.000000 |
| rad53                         | 1.22797e-17 | 1.000000 | 1.22797e-17 | 1.000000 |
| rad64                         | 3.85187e-18 | 1.000000 | 3.85187e-18 | 1.000000 |
| rad61                         | 1.15688e-18 | 1.000000 | 1.15688e-18 | 1.000000 |
| rad56                         | 9.65553e-20 | 1.000000 | 9.65553e-20 | 1.000000 |
| rad68syn                      | 1.22760e-20 | 1.000000 | 1.22760e-20 | 1.000000 |
| rad68anti                     | 9.17628e-21 | 1.000000 | 9.17628e-21 | 1.000000 |
| rad40syn                      | 1.79832e-22 | 1.000000 | 1.79832e-22 | 1.000000 |
| rad40anti                     | 1.43402e-22 | 1.000000 | 1.43402e-22 | 1.000000 |
| PAH8+H                        | 3.45930e-23 | 1.000000 | 3.45930e-23 | 1.000000 |
| rad73                         | 7.15481e-24 | 1.000000 | 7.15481e-24 | 1.000000 |
| rad71                         | 7.13356e-26 | 1.000000 | 7.13356e-26 | 1.000000 |
| rad6                          | 5.08160e-27 | 1.000000 | 5.08160e-27 | 1.000000 |
| rad19anti                     | 7.31049e-28 | 1.000000 | 7.31049e-28 | 1.000000 |
| rad2                          | 4.92481e-29 | 1.000000 | 4.92481e-29 | 1.000000 |
| rad26                         | 8.71394e-30 | 1.000000 | 8.71394e-30 | 1.000000 |
| rad28                         | 5.35101e-30 | 1.000000 | 5.35101e-30 | 1.000000 |
| rad1                          | 3.50452e-30 | 1.000000 | 3.50452e-30 | 1.000000 |
| rad10                         | 2.60033e-30 | 1.000000 | 2.60033e-30 | 1.000000 |
| rad47                         | 1.18402e-30 | 1.000000 | 1.18402e-30 | 1.000000 |
| rad7                          | 3.81403e-31 | 1.000000 | 3.81403e-31 | 1.000000 |
| rad3                          | 2.53614e-31 | 1.000000 | 2.53614e-31 | 1.000000 |
| rad4                          | 1.32185e-31 | 1.000000 | 1.32185e-31 | 1.000000 |
| rad11                         | 9.41034e-32 | 1.000000 | 9.41034e-32 | 1.000000 |
| rad9                          | 7.19267e-33 | 1.000000 | 7.19267e-33 | 1.000000 |
| rad13                         | 2.16233e-33 | 1.000000 | 2.16233e-33 | 1.000000 |
| rad31                         | 1.15497e-33 | 1.000000 | 1.15497e-33 | 1.000000 |
| rad14                         | 3.22535e-34 | 1.000000 | 3.22535e-34 | 1.000000 |
| rad25                         | 1.88068e-34 | 1.000000 | 1.88068e-34 | 1.000000 |
| rad27                         | 7.04058e-35 | 1.000000 | 7.04058e-35 | 1.000000 |
| rad33                         | 4.19661e-36 | 1.000000 | 4.19661e-36 | 1.000000 |
| rad15                         | 3.22875e-36 | 1.000000 | 3.22875e-36 | 1.000000 |
| rad19syn                      | 1.76219e-36 | 1.000000 | 1.76219e-36 | 1.000000 |
| rad5                          | 2.34284e-37 | 1.000000 | 2.34284e-37 | 1.000000 |
| rad23                         | 1.30772e-37 | 1.000000 | 1.30772e-37 | 1.000000 |
| rad45                         | 9.85437e-40 | 1.000000 | 9.85437e-40 | 1.000000 |
| rad20                         | 2.23651e-40 | 1.000000 | 2.23651e-40 | 1.000000 |
| rad12                         | 2.14599e-40 | 1.000000 | 2.14599e-40 | 1.000000 |
| rad21                         | 2.06365e-40 | 1.000000 | 2.06365e-40 | 1.000000 |
| rad36                         | 6.24969e-41 | 1.000000 | 6.24969e-41 | 1.000000 |
| rad22                         | 5.29556e-42 | 1.000000 | 5.29556e-42 | 1.000000 |
| rad18                         | 5.12636e-43 | 1.000000 | 5.12636e-43 | 1.000000 |
| rad24                         | 5.19345e-45 | 1.000000 | 5.19345e-45 | 1.000000 |
| rad8                          | 2.45881e-61 | 1.000000 | 2.45881e-61 | 1.000000 |

0.100000000E-04 Pa, 260.000000 K

=====

| Rate constant             | True (fraction)        | Effective (fraction)   |
|---------------------------|------------------------|------------------------|
| Total                     | 2.97464e-14 (1.00 )    | 2.97464e-14 (1.00 )    |
| Formation of rad19        | 2.97293e-14 (0.999 )   | 2.97293e-14 (0.999 )   |
| H-abstraction to cyc2enyl | 1.70236e-17 (0.000572) | 1.70236e-17 (0.000572) |
| H-abstraction to cyc1enyl | 3.02186e-20 (1.02e-06) | 3.02186e-20 (1.02e-06) |

| species                       | PYtrue      | Cumul    | PYeffective | Cumul    |
|-------------------------------|-------------|----------|-------------|----------|
| Indene+H                      | 0.998946    | 0.998946 | 0.998946    | 0.998946 |
| Benzene+cycloprop-2-enylidene | 0.000572291 | 0.999518 | 0.000572291 | 0.999518 |
| PhCHCCH2+H                    | 0.000453848 | 0.999972 | 0.000453848 | 0.999972 |
| PhCCH+CH3                     | 8.16529e-06 | 0.999980 | 8.16529e-06 | 0.999980 |
| C2H2+PhCH2                    | 6.95321e-06 | 0.999987 | 6.95321e-06 | 0.999987 |
| PhCCCH3+H                     | 5.02932e-06 | 0.999992 | 5.02932e-06 | 0.999992 |
| Ph+MeAc                       | 4.52059e-06 | 0.999997 | 4.52059e-06 | 0.999997 |
| rad67                         | 1.30786e-06 | 0.999998 | 1.30786e-06 | 0.999998 |
| Benzene+cycloprop-1-enylidene | 1.01588e-06 | 0.999999 | 1.01588e-06 | 0.999999 |
| Ph+Allene                     | 5.88618e-07 | 1.000000 | 5.88618e-07 | 1.000000 |
| rad35                         | 5.55458e-07 | 1.000000 | 5.55458e-07 | 1.000000 |
| PhCH2CCH+H                    | 9.17636e-08 | 1.000000 | 9.17636e-08 | 1.000000 |
| PAH7+H                        | 6.23016e-08 | 1.000000 | 6.23016e-08 | 1.000000 |
| rad39                         | 1.75209e-08 | 1.000000 | 1.75209e-08 | 1.000000 |
| rad37                         | 1.74317e-08 | 1.000000 | 1.74317e-08 | 1.000000 |
| rad30                         | 1.07732e-08 | 1.000000 | 1.07732e-08 | 1.000000 |
| PAH9+H                        | 9.70823e-10 | 1.000000 | 9.70823e-10 | 1.000000 |
| rad38                         | 4.76210e-10 | 1.000000 | 4.76210e-10 | 1.000000 |
| PhcycC3H3_A+H                 | 9.76900e-11 | 1.000000 | 9.76900e-11 | 1.000000 |
| PAH10+CH3                     | 8.98996e-11 | 1.000000 | 8.98996e-11 | 1.000000 |
| rad60syn                      | 7.17361e-11 | 1.000000 | 7.17361e-11 | 1.000000 |
| PAH3+H                        | 4.92719e-11 | 1.000000 | 4.92719e-11 | 1.000000 |
| rad60anti                     | 3.63918e-11 | 1.000000 | 3.63918e-11 | 1.000000 |
| rad46                         | 3.17862e-11 | 1.000000 | 3.17862e-11 | 1.000000 |
| rad59                         | 9.35934e-12 | 1.000000 | 9.35934e-12 | 1.000000 |
| rad54                         | 3.26922e-12 | 1.000000 | 3.26922e-12 | 1.000000 |
| rad43                         | 2.89822e-12 | 1.000000 | 2.89822e-12 | 1.000000 |
| Phenyl+cycC3H4                | 1.79997e-12 | 1.000000 | 0.000000    | 1.000000 |
| PhcycC3H3_B+H                 | 1.72357e-12 | 1.000000 | 1.72357e-12 | 1.000000 |
| rad62                         | 6.47858e-13 | 1.000000 | 6.47858e-13 | 1.000000 |
| rad50                         | 4.63656e-13 | 1.000000 | 4.63656e-13 | 1.000000 |
| rad70                         | 1.13462e-13 | 1.000000 | 1.13462e-13 | 1.000000 |
| PAH1+H                        | 6.48746e-14 | 1.000000 | 6.48746e-14 | 1.000000 |
| rad55                         | 5.01162e-14 | 1.000000 | 5.01162e-14 | 1.000000 |
| rad52                         | 5.33109e-15 | 1.000000 | 5.33109e-15 | 1.000000 |
| rad58                         | 3.93954e-15 | 1.000000 | 3.93954e-15 | 1.000000 |
| rad34                         | 3.67252e-15 | 1.000000 | 3.67252e-15 | 1.000000 |
| rad51                         | 2.62615e-15 | 1.000000 | 2.62615e-15 | 1.000000 |
| rad41                         | 1.01308e-15 | 1.000000 | 1.01308e-15 | 1.000000 |
| rad42                         | 5.82033e-16 | 1.000000 | 5.82033e-16 | 1.000000 |
| rad65                         | 6.97793e-17 | 1.000000 | 6.97793e-17 | 1.000000 |
| rad53                         | 1.97860e-17 | 1.000000 | 1.97860e-17 | 1.000000 |
| rad64                         | 6.46998e-18 | 1.000000 | 6.46998e-18 | 1.000000 |
| rad61                         | 2.22252e-18 | 1.000000 | 2.22252e-18 | 1.000000 |
| rad56                         | 1.96583e-19 | 1.000000 | 1.96583e-19 | 1.000000 |
| rad68syn                      | 2.54704e-20 | 1.000000 | 2.54704e-20 | 1.000000 |
| rad68anti                     | 1.89312e-20 | 1.000000 | 1.89312e-20 | 1.000000 |
| rad40syn                      | 4.46797e-22 | 1.000000 | 4.46797e-22 | 1.000000 |
| rad40anti                     | 3.55555e-22 | 1.000000 | 3.55555e-22 | 1.000000 |
| PAH8+H                        | 9.71820e-23 | 1.000000 | 9.71820e-23 | 1.000000 |
| rad73                         | 1.79367e-23 | 1.000000 | 1.79367e-23 | 1.000000 |
| rad71                         | 2.10958e-25 | 1.000000 | 2.10958e-25 | 1.000000 |
| rad6                          | 1.07403e-26 | 1.000000 | 1.07403e-26 | 1.000000 |
| rad19anti                     | 2.63450e-27 | 1.000000 | 2.63450e-27 | 1.000000 |
| rad2                          | 1.03740e-28 | 1.000000 | 1.03740e-28 | 1.000000 |
| rad26                         | 1.43678e-29 | 1.000000 | 1.43678e-29 | 1.000000 |
| rad28                         | 8.83488e-30 | 1.000000 | 8.83488e-30 | 1.000000 |
| rad1                          | 7.47343e-30 | 1.000000 | 7.47343e-30 | 1.000000 |
| rad10                         | 5.48801e-30 | 1.000000 | 5.48801e-30 | 1.000000 |
| rad47                         | 1.37151e-30 | 1.000000 | 1.37151e-30 | 1.000000 |
| rad7                          | 8.08224e-31 | 1.000000 | 8.08224e-31 | 1.000000 |
| rad3                          | 5.23271e-31 | 1.000000 | 5.23271e-31 | 1.000000 |
| rad4                          | 2.73676e-31 | 1.000000 | 2.73676e-31 | 1.000000 |
| rad11                         | 1.99484e-31 | 1.000000 | 1.99484e-31 | 1.000000 |
| rad9                          | 1.84123e-32 | 1.000000 | 1.84123e-32 | 1.000000 |
| rad13                         | 4.59174e-33 | 1.000000 | 4.59174e-33 | 1.000000 |
| rad31                         | 3.40264e-33 | 1.000000 | 3.40264e-33 | 1.000000 |
| rad14                         | 3.68607e-34 | 1.000000 | 3.68607e-34 | 1.000000 |
| rad25                         | 2.03828e-34 | 1.000000 | 2.03828e-34 | 1.000000 |
| rad27                         | 9.52742e-35 | 1.000000 | 9.52742e-35 | 1.000000 |
| rad33                         | 8.91887e-36 | 1.000000 | 8.91887e-36 | 1.000000 |

|          |             |         |             |         |
|----------|-------------|---------|-------------|---------|
| rad15    | 8.28601e-36 | 1.00000 | 8.28601e-36 | 1.00000 |
| rad19syn | 7.46104e-36 | 1.00000 | 7.46104e-36 | 1.00000 |
| rad23    | 5.73982e-37 | 1.00000 | 5.73982e-37 | 1.00000 |
| rad5     | 2.22142e-37 | 1.00000 | 2.22142e-37 | 1.00000 |
| rad45    | 4.50799e-39 | 1.00000 | 4.50799e-39 | 1.00000 |
| rad12    | 4.39312e-40 | 1.00000 | 4.39312e-40 | 1.00000 |
| rad20    | 3.28667e-40 | 1.00000 | 3.28667e-40 | 1.00000 |
| rad21    | 3.02008e-40 | 1.00000 | 3.02008e-40 | 1.00000 |
| rad36    | 2.87573e-40 | 1.00000 | 2.87573e-40 | 1.00000 |
| rad22    | 2.13646e-41 | 1.00000 | 2.13646e-41 | 1.00000 |
| rad18    | 7.47485e-43 | 1.00000 | 7.47485e-43 | 1.00000 |
| rad24    | 8.64495e-45 | 1.00000 | 8.64495e-45 | 1.00000 |
| rad8     | 4.68587e-61 | 1.00000 | 4.68587e-61 | 1.00000 |

0.100000000E-04 Pa, 270.000000 K

| Rate constant             | True (fraction)        | Effective (fraction)   |  |  |
|---------------------------|------------------------|------------------------|--|--|
| Total                     | 3.24655e-14 (1.00 )    | 3.24655e-14 (1.00 )    |  |  |
| Formation of rad19        | 3.24415e-14 (0.999 )   | 3.24415e-14 (0.999 )   |  |  |
| H-abstraction to cyc2enyl | 2.38790e-17 (0.000736) | 2.38790e-17 (0.000736) |  |  |
| H-abstraction to cyclenyl | 5.45397e-20 (1.68e-06) | 5.45397e-20 (1.68e-06) |  |  |

  

| species                       | PYtrue      | Cumul    | PYeffective | Cumul    |
|-------------------------------|-------------|----------|-------------|----------|
| Indene+H                      | 0.998755    | 0.998755 | 0.998755    | 0.998755 |
| Benzene+cycloprop-2-enylidene | 0.000735519 | 0.999491 | 0.000735519 | 0.999491 |
| PhCHCCH2+H                    | 0.000478146 | 0.999969 | 0.000478146 | 0.999969 |
| PhCCH+CH3                     | 8.60880e-06 | 0.999977 | 8.60880e-06 | 0.999977 |
| C2H2+PhCH2                    | 7.43973e-06 | 0.999985 | 7.43973e-06 | 0.999985 |
| PhCCCH3+H                     | 5.34286e-06 | 0.999990 | 5.34286e-06 | 0.999990 |
| Ph+MeAc                       | 4.86938e-06 | 0.999995 | 4.86938e-06 | 0.999995 |
| Benzene+cycloprop-1-enylidene | 1.67993e-06 | 0.999997 | 1.67993e-06 | 0.999997 |
| rad67                         | 1.40525e-06 | 0.999998 | 1.40525e-06 | 0.999998 |
| Ph+Allene                     | 6.54187e-07 | 0.999999 | 6.54187e-07 | 0.999999 |
| rad35                         | 5.95116e-07 | 0.999999 | 5.95116e-07 | 0.999999 |
| PhCH2CCH+H                    | 1.03828e-07 | 1.000000 | 1.03828e-07 | 1.000000 |
| PAH7+H                        | 6.80923e-08 | 1.000000 | 6.80923e-08 | 1.000000 |
| rad37                         | 1.91542e-08 | 1.000000 | 1.91542e-08 | 1.000000 |
| rad39                         | 1.91343e-08 | 1.000000 | 1.91343e-08 | 1.000000 |
| rad30                         | 1.15872e-08 | 1.000000 | 1.15872e-08 | 1.000000 |
| PAH9+H                        | 1.07084e-09 | 1.000000 | 1.07084e-09 | 1.000000 |
| rad38                         | 5.32068e-10 | 1.000000 | 5.32068e-10 | 1.000000 |
| PhcycC3H3_A+H                 | 1.30538e-10 | 1.000000 | 1.30538e-10 | 1.000000 |
| PAH10+CH3                     | 1.09134e-10 | 1.000000 | 1.09134e-10 | 1.000000 |
| rad60syn                      | 7.96566e-11 | 1.000000 | 7.96566e-11 | 1.000000 |
| PAH3+H                        | 5.69579e-11 | 1.000000 | 5.69579e-11 | 1.000000 |
| rad60anti                     | 4.05238e-11 | 1.000000 | 4.05238e-11 | 1.000000 |
| rad46                         | 3.57543e-11 | 1.000000 | 3.57543e-11 | 1.000000 |
| rad59                         | 1.07444e-11 | 1.000000 | 1.07444e-11 | 1.000000 |
| rad54                         | 3.96666e-12 | 1.000000 | 3.96666e-12 | 1.000000 |
| rad43                         | 3.41976e-12 | 1.000000 | 3.41976e-12 | 1.000000 |
| PhcycC3H3_B+H                 | 2.69151e-12 | 1.000000 | 2.69151e-12 | 1.000000 |
| Phenyl+cycC3H4                | 2.60320e-12 | 1.000000 | 0.000000    | 1.000000 |
| rad62                         | 7.63634e-13 | 1.000000 | 7.63634e-13 | 1.000000 |
| rad50                         | 5.53420e-13 | 1.000000 | 5.53420e-13 | 1.000000 |
| rad70                         | 1.44343e-13 | 1.000000 | 1.44343e-13 | 1.000000 |
| PAH1+H                        | 8.70739e-14 | 1.000000 | 8.70739e-14 | 1.000000 |
| rad55                         | 6.36740e-14 | 1.000000 | 6.36740e-14 | 1.000000 |
| rad52                         | 6.63064e-15 | 1.000000 | 6.63064e-15 | 1.000000 |
| rad58                         | 5.12944e-15 | 1.000000 | 5.12944e-15 | 1.000000 |
| rad34                         | 4.95119e-15 | 1.000000 | 4.95119e-15 | 1.000000 |
| rad51                         | 3.41605e-15 | 1.000000 | 3.41605e-15 | 1.000000 |
| rad41                         | 1.38732e-15 | 1.000000 | 1.38732e-15 | 1.000000 |
| rad42                         | 7.76678e-16 | 1.000000 | 7.76678e-16 | 1.000000 |
| rad65                         | 9.20537e-17 | 1.000000 | 9.20537e-17 | 1.000000 |
| rad53                         | 3.15549e-17 | 1.000000 | 3.15549e-17 | 1.000000 |
| rad64                         | 1.07030e-17 | 1.000000 | 1.07030e-17 | 1.000000 |
| rad61                         | 4.14942e-18 | 1.000000 | 4.14942e-18 | 1.000000 |
| rad56                         | 3.86758e-19 | 1.000000 | 3.86758e-19 | 1.000000 |
| rad68syn                      | 5.09279e-20 | 1.000000 | 5.09279e-20 | 1.000000 |
| rad68anti                     | 3.76573e-20 | 1.000000 | 3.76573e-20 | 1.000000 |
| rad40syn                      | 1.04541e-21 | 1.000000 | 1.04541e-21 | 1.000000 |
| rad40anti                     | 8.30243e-22 | 1.000000 | 8.30243e-22 | 1.000000 |
| PAH8+H                        | 2.52772e-22 | 1.000000 | 2.52772e-22 | 1.000000 |
| rad73                         | 4.24307e-23 | 1.000000 | 4.24307e-23 | 1.000000 |
| rad71                         | 5.73648e-25 | 1.000000 | 5.73648e-25 | 1.000000 |
| rad6                          | 2.49996e-26 | 1.000000 | 2.49996e-26 | 1.000000 |
| rad19anti                     | 9.66952e-27 | 1.000000 | 9.66952e-27 | 1.000000 |
| rad2                          | 2.26627e-28 | 1.000000 | 2.26627e-28 | 1.000000 |



|          |             |          |             |          |
|----------|-------------|----------|-------------|----------|
| rad26    | 2.51767e-29 | 1.000000 | 2.51767e-29 | 1.000000 |
| rad1     | 1.65433e-29 | 1.000000 | 1.65433e-29 | 1.000000 |
| rad28    | 1.62758e-29 | 1.000000 | 1.62758e-29 | 1.000000 |
| rad10    | 1.20109e-29 | 1.000000 | 1.20109e-29 | 1.000000 |
| rad7     | 1.88627e-30 | 1.000000 | 1.88627e-30 | 1.000000 |
| rad47    | 1.61684e-30 | 1.000000 | 1.61684e-30 | 1.000000 |
| rad3     | 1.11975e-30 | 1.000000 | 1.11975e-30 | 1.000000 |
| rad4     | 5.87832e-31 | 1.000000 | 5.87832e-31 | 1.000000 |
| rad11    | 4.65653e-31 | 1.000000 | 4.65653e-31 | 1.000000 |
| rad9     | 5.58811e-32 | 1.000000 | 5.58811e-32 | 1.000000 |
| rad13    | 1.07401e-32 | 1.000000 | 1.07401e-32 | 1.000000 |
| rad31    | 1.03174e-32 | 1.000000 | 1.03174e-32 | 1.000000 |
| rad14    | 4.45097e-34 | 1.000000 | 4.45097e-34 | 1.000000 |
| rad25    | 2.24435e-34 | 1.000000 | 2.24435e-34 | 1.000000 |
| rad27    | 1.41442e-34 | 1.000000 | 1.41442e-34 | 1.000000 |
| rad19syn | 3.27847e-35 | 1.000000 | 3.27847e-35 | 1.000000 |
| rad15    | 2.52130e-35 | 1.000000 | 2.52130e-35 | 1.000000 |
| rad33    | 2.08820e-35 | 1.000000 | 2.08820e-35 | 1.000000 |
| rad23    | 2.67097e-36 | 1.000000 | 2.67097e-36 | 1.000000 |
| rad5     | 2.11137e-37 | 1.000000 | 2.11137e-37 | 1.000000 |
| rad45    | 2.20792e-38 | 1.000000 | 2.20792e-38 | 1.000000 |
| rad36    | 1.41757e-39 | 1.000000 | 1.41757e-39 | 1.000000 |
| rad12    | 9.86353e-40 | 1.000000 | 9.86353e-40 | 1.000000 |
| rad20    | 5.34596e-40 | 1.000000 | 5.34596e-40 | 1.000000 |
| rad21    | 4.83581e-40 | 1.000000 | 4.83581e-40 | 1.000000 |
| rad22    | 9.11296e-41 | 1.000000 | 9.11296e-41 | 1.000000 |
| rad18    | 1.30343e-42 | 1.000000 | 1.30343e-42 | 1.000000 |
| rad24    | 1.49317e-44 | 1.000000 | 1.49317e-44 | 1.000000 |
| rad8     | 9.13969e-61 | 1.000000 | 9.13969e-61 | 1.000000 |

0.100000000E-04 Pa, 280.000000 K

| Rate constant             | True (fraction)        | Effective (fraction)   |
|---------------------------|------------------------|------------------------|
| Total                     | 3.52572e-14 (1.00 )    | 3.52572e-14 (1.00 )    |
| Formation of rad19        | 3.52244e-14 (0.999 )   | 3.52244e-14 (0.999 )   |
| H-abstraction to cyc2enyl | 3.26639e-17 (0.000926) | 3.26639e-17 (0.000926) |
| H-abstraction to cyclenyl | 9.42926e-20 (2.67e-06) | 9.42926e-20 (2.67e-06) |

| species                       | PYtrue      | Cumul    | PYeffective | Cumul    |
|-------------------------------|-------------|----------|-------------|----------|
| Indene+H                      | 0.998535    | 0.998535 | 0.998535    | 0.998535 |
| Benzene+cycloprop-2-enylidene | 0.000926445 | 0.999462 | 0.000926445 | 0.999462 |
| PhCHCCH2+H                    | 0.000504654 | 0.999966 | 0.000504654 | 0.999966 |
| PhCCH+CH3                     | 9.09038e-06 | 0.999976 | 9.09038e-06 | 0.999976 |
| C2H2+PhCH2                    | 7.97755e-06 | 0.999984 | 7.97755e-06 | 0.999984 |
| PhCCCH3+H                     | 5.68676e-06 | 0.999989 | 5.68676e-06 | 0.999989 |
| Ph+MeAc                       | 5.25697e-06 | 0.999994 | 5.25697e-06 | 0.999994 |
| Benzene+cycloprop-1-enylidene | 2.67442e-06 | 0.999997 | 2.67442e-06 | 0.999997 |
| rad67                         | 1.51340e-06 | 0.999999 | 1.51340e-06 | 0.999999 |
| Ph+Allene                     | 7.29448e-07 | 0.999999 | 7.29448e-07 | 0.999999 |
| rad35                         | 6.39046e-07 | 1.00000  | 6.39046e-07 | 1.00000  |
| PhCH2CCH+H                    | 1.17909e-07 | 1.00000  | 1.17909e-07 | 1.00000  |
| PAH7+H                        | 7.46290e-08 | 1.00000  | 7.46290e-08 | 1.00000  |
| rad37                         | 2.11094e-08 | 1.00000  | 2.11094e-08 | 1.00000  |
| rad39                         | 2.09522e-08 | 1.00000  | 2.09522e-08 | 1.00000  |
| rad30                         | 1.24940e-08 | 1.00000  | 1.24940e-08 | 1.00000  |
| PAH9+H                        | 1.18522e-09 | 1.00000  | 1.18522e-09 | 1.00000  |
| rad38                         | 5.96837e-10 | 1.00000  | 5.96837e-10 | 1.00000  |
| PhcycC3H3_A+H                 | 1.74264e-10 | 1.00000  | 1.74264e-10 | 1.00000  |
| PAH10+CH3                     | 1.33029e-10 | 1.00000  | 1.33029e-10 | 1.00000  |
| rad60syn                      | 8.87606e-11 | 1.00000  | 8.87606e-11 | 1.00000  |
| PAH3+H                        | 6.61334e-11 | 1.00000  | 6.61334e-11 | 1.00000  |
| rad60anti                     | 4.52857e-11 | 1.00000  | 4.52857e-11 | 1.00000  |
| rad46                         | 4.03795e-11 | 1.00000  | 4.03795e-11 | 1.00000  |
| rad59                         | 1.23862e-11 | 1.00000  | 1.23862e-11 | 1.00000  |
| rad54                         | 4.83284e-12 | 1.00000  | 4.83284e-12 | 1.00000  |
| PhcycC3H3_B+H                 | 4.15199e-12 | 1.00000  | 4.15199e-12 | 1.00000  |
| rad43                         | 4.04946e-12 | 1.00000  | 4.04946e-12 | 1.00000  |
| Phenyl+cycC3H4                | 3.74742e-12 | 1.00000  | 0.00000     | 1.00000  |
| rad62                         | 9.02853e-13 | 1.00000  | 9.02853e-13 | 1.00000  |
| rad50                         | 6.64060e-13 | 1.00000  | 6.64060e-13 | 1.00000  |
| rad70                         | 1.84259e-13 | 1.00000  | 1.84259e-13 | 1.00000  |
| PAH1+H                        | 1.17039e-13 | 1.00000  | 1.17039e-13 | 1.00000  |
| rad55                         | 8.11650e-14 | 1.00000  | 8.11650e-14 | 1.00000  |
| rad52                         | 8.29198e-15 | 1.00000  | 8.29198e-15 | 1.00000  |
| rad58                         | 6.70136e-15 | 1.00000  | 6.70136e-15 | 1.00000  |
| rad34                         | 6.68466e-15 | 1.00000  | 6.68466e-15 | 1.00000  |
| rad51                         | 4.46577e-15 | 1.00000  | 4.46577e-15 | 1.00000  |
| rad41                         | 1.89783e-15 | 1.00000  | 1.89783e-15 | 1.00000  |

|           |             |         |             |         |
|-----------|-------------|---------|-------------|---------|
| rad42     | 1.03572e-15 | 1.00000 | 1.03572e-15 | 1.00000 |
| rad65     | 1.21961e-16 | 1.00000 | 1.21961e-16 | 1.00000 |
| rad53     | 4.97919e-17 | 1.00000 | 4.97919e-17 | 1.00000 |
| rad64     | 1.74396e-17 | 1.00000 | 1.74396e-17 | 1.00000 |
| rad61     | 7.53772e-18 | 1.00000 | 7.53772e-18 | 1.00000 |
| rad56     | 7.36384e-19 | 1.00000 | 7.36384e-19 | 1.00000 |
| rad68syn  | 9.83169e-20 | 1.00000 | 9.83169e-20 | 1.00000 |
| rad68anti | 7.23595e-20 | 1.00000 | 7.23595e-20 | 1.00000 |
| rad40syn  | 2.31284e-21 | 1.00000 | 2.31284e-21 | 1.00000 |
| rad40anti | 1.83329e-21 | 1.00000 | 1.83329e-21 | 1.00000 |
| PAH8+H    | 6.12419e-22 | 1.00000 | 6.12419e-22 | 1.00000 |
| rad73     | 9.50003e-23 | 1.00000 | 9.50003e-23 | 1.00000 |
| rad71     | 1.44434e-24 | 1.00000 | 1.44434e-24 | 1.00000 |
| rad6      | 6.29673e-26 | 1.00000 | 6.29673e-26 | 1.00000 |
| rad19anti | 3.59339e-26 | 1.00000 | 3.59339e-26 | 1.00000 |
| rad2      | 5.12096e-28 | 1.00000 | 5.12096e-28 | 1.00000 |
| rad26     | 4.63368e-29 | 1.00000 | 4.63368e-29 | 1.00000 |
| rad1      | 3.79156e-29 | 1.00000 | 3.79156e-29 | 1.00000 |
| rad28     | 3.27267e-29 | 1.00000 | 3.27267e-29 | 1.00000 |
| rad10     | 2.71827e-29 | 1.00000 | 2.71827e-29 | 1.00000 |
| rad7      | 4.76383e-30 | 1.00000 | 4.76383e-30 | 1.00000 |
| rad3      | 2.47673e-30 | 1.00000 | 2.47673e-30 | 1.00000 |
| rad47     | 1.94125e-30 | 1.00000 | 1.94125e-30 | 1.00000 |
| rad4      | 1.30543e-30 | 1.00000 | 1.30543e-30 | 1.00000 |
| rad11     | 1.17596e-30 | 1.00000 | 1.17596e-30 | 1.00000 |
| rad9      | 1.89186e-31 | 1.00000 | 1.89186e-31 | 1.00000 |
| rad31     | 3.20738e-32 | 1.00000 | 3.20738e-32 | 1.00000 |
| rad13     | 2.71882e-32 | 1.00000 | 2.71882e-32 | 1.00000 |
| rad14     | 5.79550e-34 | 1.00000 | 5.79550e-34 | 1.00000 |
| rad25     | 2.53646e-34 | 1.00000 | 2.53646e-34 | 1.00000 |
| rad27     | 2.31847e-34 | 1.00000 | 2.31847e-34 | 1.00000 |
| rad19syn  | 1.48909e-34 | 1.00000 | 1.48909e-34 | 1.00000 |
| rad15     | 8.55870e-35 | 1.00000 | 8.55870e-35 | 1.00000 |
| rad33     | 5.29123e-35 | 1.00000 | 5.29123e-35 | 1.00000 |
| rad23     | 1.30951e-35 | 1.00000 | 1.30951e-35 | 1.00000 |
| rad5      | 2.01133e-37 | 1.00000 | 2.01133e-37 | 1.00000 |
| rad45     | 1.15022e-37 | 1.00000 | 1.15022e-37 | 1.00000 |
| rad36     | 7.43729e-39 | 1.00000 | 7.43729e-39 | 1.00000 |
| rad12     | 2.47676e-39 | 1.00000 | 2.47676e-39 | 1.00000 |
| rad20     | 1.00418e-39 | 1.00000 | 1.00418e-39 | 1.00000 |
| rad21     | 8.83720e-40 | 1.00000 | 8.83720e-40 | 1.00000 |
| rad22     | 4.08108e-40 | 1.00000 | 4.08108e-40 | 1.00000 |
| rad18     | 2.78443e-42 | 1.00000 | 2.78443e-42 | 1.00000 |
| rad24     | 2.73290e-44 | 1.00000 | 2.73290e-44 | 1.00000 |
| rad8      | 1.82566e-60 | 1.00000 | 1.82566e-60 | 1.00000 |

0.100000000E-04 Pa, 290.000000 K

=====

| Rate constant             | True (fraction)        | Effective (fraction)   |
|---------------------------|------------------------|------------------------|
| Total                     | 3.81171e-14 (1.00 )    | 3.81171e-14 (1.00 )    |
| Formation of rad19        | 3.80733e-14 (0.999 )   | 3.80733e-14 (0.999 )   |
| H-abstraction to cyc2enyl | 4.36868e-17 (0.00115 ) | 4.36868e-17 (0.00115 ) |
| H-abstraction to cyclenyl | 1.56861e-19 (4.12e-06) | 1.56861e-19 (4.12e-06) |

| species                       | PYtrue      | Cumul    | PYeffective | Cumul    |
|-------------------------------|-------------|----------|-------------|----------|
| Indene+H                      | 0.998282    | 0.998282 | 0.998282    | 0.998282 |
| Benzene+cycloprop-2-enylidene | 0.00114612  | 0.999429 | 0.00114612  | 0.999429 |
| PhCHCCH2+H                    | 0.000533552 | 0.999962 | 0.000533552 | 0.999962 |
| PhCCH+CH3                     | 9.61277e-06 | 0.999972 | 9.61277e-06 | 0.999972 |
| C2H2+PhCH2                    | 8.57172e-06 | 0.999980 | 8.57172e-06 | 0.999980 |
| PhCCCH3+H                     | 6.06370e-06 | 0.999986 | 6.06370e-06 | 0.999986 |
| Ph+MeAc                       | 5.68749e-06 | 0.999992 | 5.68749e-06 | 0.999992 |
| Benzene+cycloprop-1-enylidene | 4.11523e-06 | 0.999996 | 4.11523e-06 | 0.999996 |
| rad67                         | 1.63346e-06 | 0.999998 | 1.63346e-06 | 0.999998 |
| Ph+Allene                     | 8.15839e-07 | 0.999999 | 8.15839e-07 | 0.999999 |
| rad35                         | 6.87689e-07 | 0.999999 | 6.87689e-07 | 0.999999 |
| PhCH2CCH+H                    | 1.34349e-07 | 0.999999 | 1.34349e-07 | 0.999999 |
| PAH7+H                        | 8.20060e-08 | 0.999999 | 8.20060e-08 | 0.999999 |
| rad37                         | 2.33285e-08 | 1.000000 | 2.33285e-08 | 1.000000 |
| rad39                         | 2.30001e-08 | 1.000000 | 2.30001e-08 | 1.000000 |
| rad30                         | 1.35042e-08 | 1.000000 | 1.35042e-08 | 1.000000 |
| PAH9+H                        | 1.31607e-09 | 1.000000 | 1.31607e-09 | 1.000000 |
| rad38                         | 6.71987e-10 | 1.000000 | 6.71987e-10 | 1.000000 |
| PhcycC3H3_A+H                 | 2.32248e-10 | 1.000000 | 2.32248e-10 | 1.000000 |
| PAH10+CH3                     | 1.62717e-10 | 1.000000 | 1.62717e-10 | 1.000000 |
| rad60syn                      | 9.92285e-11 | 1.000000 | 9.92285e-11 | 1.000000 |
| PAH3+H                        | 7.70956e-11 | 1.000000 | 7.70956e-11 | 1.000000 |
| rad60anti                     | 5.07758e-11 | 1.000000 | 5.07758e-11 | 1.000000 |

|                |             |          |             |          |
|----------------|-------------|----------|-------------|----------|
| rad46          | 4.57748e-11 | 1.000000 | 4.57748e-11 | 1.000000 |
| rad59          | 1.43338e-11 | 1.000000 | 1.43338e-11 | 1.000000 |
| PhcycC3H3_B+H  | 6.32701e-12 | 1.000000 | 6.32701e-12 | 1.000000 |
| rad54          | 5.90859e-12 | 1.000000 | 5.90859e-12 | 1.000000 |
| Phenyl+cycC3H4 | 5.36584e-12 | 1.000000 | 0.000000    | 1.000000 |
| rad43          | 4.80968e-12 | 1.000000 | 4.80968e-12 | 1.000000 |
| rad62          | 1.07018e-12 | 1.000000 | 1.07018e-12 | 1.000000 |
| rad50          | 8.00596e-13 | 1.000000 | 8.00596e-13 | 1.000000 |
| rad70          | 2.35807e-13 | 1.000000 | 2.35807e-13 | 1.000000 |
| PAH1+H         | 1.57377e-13 | 1.000000 | 1.57377e-13 | 1.000000 |
| rad55          | 1.03709e-13 | 1.000000 | 1.03709e-13 | 1.000000 |
| rad52          | 1.04176e-14 | 1.000000 | 1.04176e-14 | 1.000000 |
| rad34          | 9.02825e-15 | 1.000000 | 9.02825e-15 | 1.000000 |
| rad58          | 8.77577e-15 | 1.000000 | 8.77577e-15 | 1.000000 |
| rad51          | 5.86071e-15 | 1.000000 | 5.86071e-15 | 1.000000 |
| rad41          | 2.59126e-15 | 1.000000 | 2.59126e-15 | 1.000000 |
| rad42          | 1.37913e-15 | 1.000000 | 1.37913e-15 | 1.000000 |
| rad65          | 1.62088e-16 | 1.000000 | 1.62088e-16 | 1.000000 |
| rad53          | 7.76875e-17 | 1.000000 | 7.76875e-17 | 1.000000 |
| rad64          | 2.79837e-17 | 1.000000 | 2.79837e-17 | 1.000000 |
| rad61          | 1.33318e-17 | 1.000000 | 1.33318e-17 | 1.000000 |
| rad56          | 1.35815e-18 | 1.000000 | 1.35815e-18 | 1.000000 |
| rad68syn       | 1.83484e-19 | 1.000000 | 1.83484e-19 | 1.000000 |
| rad68anti      | 1.34481e-19 | 1.000000 | 1.34481e-19 | 1.000000 |
| rad40syn       | 4.85494e-21 | 1.000000 | 4.85494e-21 | 1.000000 |
| rad40anti      | 3.84148e-21 | 1.000000 | 3.84148e-21 | 1.000000 |
| PAH8+H         | 1.38965e-21 | 1.000000 | 1.38965e-21 | 1.000000 |
| rad73          | 2.01863e-22 | 1.000000 | 2.01863e-22 | 1.000000 |
| rad71          | 3.38824e-24 | 1.000000 | 3.38824e-24 | 1.000000 |
| rad6           | 1.67791e-25 | 1.000000 | 1.67791e-25 | 1.000000 |
| rad19anti      | 1.34354e-25 | 1.000000 | 1.34354e-25 | 1.000000 |
| rad2           | 1.19267e-27 | 1.000000 | 1.19267e-27 | 1.000000 |
| rad1           | 8.96558e-29 | 1.000000 | 8.96558e-29 | 1.000000 |
| rad26          | 8.87683e-29 | 1.000000 | 8.87683e-29 | 1.000000 |
| rad28          | 7.01681e-29 | 1.000000 | 7.01681e-29 | 1.000000 |
| rad10          | 6.34525e-29 | 1.000000 | 6.34525e-29 | 1.000000 |
| rad7           | 1.27286e-29 | 1.000000 | 1.27286e-29 | 1.000000 |
| rad3           | 5.65432e-30 | 1.000000 | 5.65432e-30 | 1.000000 |
| rad11          | 3.14087e-30 | 1.000000 | 3.14087e-30 | 1.000000 |
| rad4           | 2.99317e-30 | 1.000000 | 2.99317e-30 | 1.000000 |
| rad47          | 2.37556e-30 | 1.000000 | 2.37556e-30 | 1.000000 |
| rad9           | 6.80130e-31 | 1.000000 | 6.80130e-31 | 1.000000 |
| rad31          | 1.01788e-31 | 1.000000 | 1.01788e-31 | 1.000000 |
| rad13          | 7.28277e-32 | 1.000000 | 7.28277e-32 | 1.000000 |
| rad14          | 8.28209e-34 | 1.000000 | 8.28209e-34 | 1.000000 |
| rad19syn       | 6.95957e-34 | 1.000000 | 6.95957e-34 | 1.000000 |
| rad27          | 4.16885e-34 | 1.000000 | 4.16885e-34 | 1.000000 |
| rad15          | 3.08537e-34 | 1.000000 | 3.08537e-34 | 1.000000 |
| rad25          | 2.99908e-34 | 1.000000 | 2.99908e-34 | 1.000000 |
| rad33          | 1.41828e-34 | 1.000000 | 1.41828e-34 | 1.000000 |
| rad23          | 6.72012e-35 | 1.000000 | 6.72012e-35 | 1.000000 |
| rad45          | 6.33934e-37 | 1.000000 | 6.33934e-37 | 1.000000 |
| rad5           | 1.92020e-37 | 1.000000 | 1.92020e-37 | 1.000000 |
| rad36          | 4.13069e-38 | 1.000000 | 4.13069e-38 | 1.000000 |
| rad12          | 7.00626e-39 | 1.000000 | 7.00626e-39 | 1.000000 |
| rad20          | 2.22104e-39 | 1.000000 | 2.22104e-39 | 1.000000 |
| rad22          | 1.90578e-39 | 1.000000 | 1.90578e-39 | 1.000000 |
| rad21          | 1.89383e-39 | 1.000000 | 1.89383e-39 | 1.000000 |
| rad18          | 7.02598e-42 | 1.000000 | 7.02598e-42 | 1.000000 |
| rad24          | 5.53697e-44 | 1.000000 | 5.53697e-44 | 1.000000 |
| rad8           | 3.73728e-60 | 1.000000 | 3.73728e-60 | 1.000000 |

0.100000000E-04 Pa, 300.000000 K

=====

| Rate constant             | True (fraction)        | Effective (fraction)   |
|---------------------------|------------------------|------------------------|
| Total                     | 5.34809e-14 (1.00 )    | 5.34809e-14 (1.00 )    |
| Formation of rad19        | 5.34010e-14 (0.999 )   | 5.34010e-14 (0.999 )   |
| H-abstraction to cyc2enyl | 7.95823e-17 (0.00149 ) | 7.95823e-17 (0.00149 ) |
| H-abstraction to cyclenyl | 3.44981e-19 (6.45e-06) | 3.44981e-19 (6.45e-06) |

| species                       | PYtrue      | Cumul    | PYeffective | Cumul    |
|-------------------------------|-------------|----------|-------------|----------|
| Indene+H                      | 0.997939    | 0.997939 | 0.997939    | 0.997939 |
| Benzene+cycloprop-2-enylidene | 0.00148805  | 0.999427 | 0.00148805  | 0.999427 |
| PhCHCCH2+H                    | 0.000529814 | 0.999957 | 0.000529814 | 0.999957 |
| PhCCH+CH3                     | 1.04615e-05 | 0.999968 | 1.04615e-05 | 0.999968 |
| C2H2+PhCH2                    | 9.96265e-06 | 0.999978 | 9.96265e-06 | 0.999978 |
| Benzene+cycloprop-1-enylidene | 6.45054e-06 | 0.999984 | 6.45054e-06 | 0.999984 |
| PhCCCH3+H                     | 6.36715e-06 | 0.999990 | 6.36715e-06 | 0.999990 |

|                |             |          |             |          |
|----------------|-------------|----------|-------------|----------|
| Ph+MeAc        | 5.99826e-06 | 0.999996 | 5.99826e-06 | 0.999996 |
| rad67          | 1.76909e-06 | 0.999998 | 1.76909e-06 | 0.999998 |
| Ph+Allene      | 8.18996e-07 | 0.999999 | 8.18996e-07 | 0.999999 |
| rad35          | 7.31807e-07 | 1.000000 | 7.31807e-07 | 1.000000 |
| PhCH2CCH+H     | 1.62469e-07 | 1.000000 | 1.62469e-07 | 1.000000 |
| PAH7+H         | 1.00667e-07 | 1.000000 | 1.00667e-07 | 1.000000 |
| rad37          | 2.83206e-08 | 1.000000 | 2.83206e-08 | 1.000000 |
| rad39          | 2.48351e-08 | 1.000000 | 2.48351e-08 | 1.000000 |
| rad30          | 1.39398e-08 | 1.000000 | 1.39398e-08 | 1.000000 |
| PAH9+H         | 1.67898e-09 | 1.000000 | 1.67898e-09 | 1.000000 |
| rad38          | 7.72652e-10 | 1.000000 | 7.72652e-10 | 1.000000 |
| PhcycC3H3_A+H  | 3.25290e-10 | 1.000000 | 3.25290e-10 | 1.000000 |
| PAH10+CH3      | 2.37266e-10 | 1.000000 | 2.37266e-10 | 1.000000 |
| rad60syn       | 1.06834e-10 | 1.000000 | 1.06834e-10 | 1.000000 |
| PAH3+H         | 9.84715e-11 | 1.000000 | 9.84715e-11 | 1.000000 |
| rad60anti      | 5.51572e-11 | 1.000000 | 5.51572e-11 | 1.000000 |
| rad46          | 5.45644e-11 | 1.000000 | 5.45644e-11 | 1.000000 |
| rad59          | 1.67258e-11 | 1.000000 | 1.67258e-11 | 1.000000 |
| PhcycC3H3_B+H  | 1.05896e-11 | 1.000000 | 1.05896e-11 | 1.000000 |
| Phenyl+cycC3H4 | 8.20984e-12 | 1.000000 | 0.000000    | 1.000000 |
| rad54          | 7.66783e-12 | 1.000000 | 7.66783e-12 | 1.000000 |
| rad43          | 5.65558e-12 | 1.000000 | 5.65558e-12 | 1.000000 |
| rad62          | 1.25276e-12 | 1.000000 | 1.25276e-12 | 1.000000 |
| rad50          | 1.03315e-12 | 1.000000 | 1.03315e-12 | 1.000000 |
| rad70          | 3.13392e-13 | 1.000000 | 3.13392e-13 | 1.000000 |
| PAH1+H         | 1.93779e-13 | 1.000000 | 1.93779e-13 | 1.000000 |
| rad55          | 1.33843e-13 | 1.000000 | 1.33843e-13 | 1.000000 |
| rad52          | 1.45721e-14 | 1.000000 | 1.45721e-14 | 1.000000 |
| rad34          | 1.28521e-14 | 1.000000 | 1.28521e-14 | 1.000000 |
| rad58          | 1.11204e-14 | 1.000000 | 1.11204e-14 | 1.000000 |
| rad51          | 8.23951e-15 | 1.000000 | 8.23951e-15 | 1.000000 |
| rad41          | 3.58185e-15 | 1.000000 | 3.58185e-15 | 1.000000 |
| rad42          | 1.81926e-15 | 1.000000 | 1.81926e-15 | 1.000000 |
| rad65          | 2.32648e-16 | 1.000000 | 2.32648e-16 | 1.000000 |
| rad53          | 1.29481e-16 | 1.000000 | 1.29481e-16 | 1.000000 |
| rad64          | 4.98973e-17 | 1.000000 | 4.98973e-17 | 1.000000 |
| rad61          | 2.74862e-17 | 1.000000 | 2.74862e-17 | 1.000000 |
| rad56          | 3.01521e-18 | 1.000000 | 3.01521e-18 | 1.000000 |
| rad68syn       | 3.96643e-19 | 1.000000 | 3.96643e-19 | 1.000000 |
| rad68anti      | 2.85688e-19 | 1.000000 | 2.85688e-19 | 1.000000 |
| rad40syn       | 1.34588e-20 | 1.000000 | 1.34588e-20 | 1.000000 |
| rad40anti      | 1.02810e-20 | 1.000000 | 1.02810e-20 | 1.000000 |
| PAH8+H         | 5.53972e-21 | 1.000000 | 5.53972e-21 | 1.000000 |
| rad19anti      | 1.46846e-21 | 1.000000 | 1.46846e-21 | 1.000000 |
| rad73          | 6.54843e-22 | 1.000000 | 6.54843e-22 | 1.000000 |
| rad6           | 2.43879e-22 | 1.000000 | 2.43879e-22 | 1.000000 |
| rad71          | 2.13406e-23 | 1.000000 | 2.13406e-23 | 1.000000 |
| rad2           | 1.67477e-23 | 1.000000 | 1.67477e-23 | 1.000000 |
| rad1           | 1.26201e-24 | 1.000000 | 1.26201e-24 | 1.000000 |
| rad10          | 1.01397e-24 | 1.000000 | 1.01397e-24 | 1.000000 |
| rad9           | 4.58176e-25 | 1.000000 | 4.58176e-25 | 1.000000 |
| rad26          | 4.21117e-25 | 1.000000 | 4.21117e-25 | 1.000000 |
| rad3           | 1.80670e-25 | 1.000000 | 1.80670e-25 | 1.000000 |
| rad28          | 1.62305e-25 | 1.000000 | 1.62305e-25 | 1.000000 |
| rad4           | 8.98477e-26 | 1.000000 | 8.98477e-26 | 1.000000 |
| rad7           | 2.16683e-26 | 1.000000 | 2.16683e-26 | 1.000000 |
| rad23          | 5.65420e-27 | 1.000000 | 5.65420e-27 | 1.000000 |
| rad11          | 5.18115e-27 | 1.000000 | 5.18115e-27 | 1.000000 |
| rad31          | 9.66300e-28 | 1.000000 | 9.66300e-28 | 1.000000 |
| rad15          | 2.72123e-28 | 1.000000 | 2.72123e-28 | 1.000000 |
| rad45          | 1.61497e-28 | 1.000000 | 1.61497e-28 | 1.000000 |
| rad13          | 1.24774e-28 | 1.000000 | 1.24774e-28 | 1.000000 |
| rad19syn       | 1.12386e-28 | 1.000000 | 1.12386e-28 | 1.000000 |
| rad25          | 3.62943e-29 | 1.000000 | 3.62943e-29 | 1.000000 |
| rad14          | 2.69675e-29 | 1.000000 | 2.69675e-29 | 1.000000 |
| rad47          | 1.77284e-29 | 1.000000 | 1.77284e-29 | 1.000000 |
| rad27          | 1.61921e-29 | 1.000000 | 1.61921e-29 | 1.000000 |
| rad36          | 5.50439e-30 | 1.000000 | 5.50439e-30 | 1.000000 |
| rad72          | 4.67174e-30 | 1.000000 | 4.67174e-30 | 1.000000 |
| rad12          | 9.87255e-31 | 1.000000 | 9.87255e-31 | 1.000000 |
| rad33          | 4.22903e-31 | 1.000000 | 4.22903e-31 | 1.000000 |
| rad22          | 1.99277e-31 | 1.000000 | 1.99277e-31 | 1.000000 |
| rad5           | 1.92853e-31 | 1.000000 | 1.92853e-31 | 1.000000 |
| rad21          | 1.08431e-32 | 1.000000 | 1.08431e-32 | 1.000000 |
| rad20          | 6.41032e-33 | 1.000000 | 6.41032e-33 | 1.000000 |
| rad18          | 1.22120e-34 | 1.000000 | 1.22120e-34 | 1.000000 |
| rad24          | 5.17104e-36 | 1.000000 | 5.17104e-36 | 1.000000 |
| rad8           | 3.04177e-46 | 1.000000 | 3.04177e-46 | 1.000000 |

0.100000000E-04 Pa, 310.000000 K

=====

| Rate constant             | True (fraction)        | Effective (fraction)   |
|---------------------------|------------------------|------------------------|
| Total                     | 5.92544e-14 (1.00 )    | 5.92544e-14 (1.00 )    |
| Formation of rad19        | 5.91462e-14 (0.998 )   | 5.91462e-14 (0.998 )   |
| H-abstraction to cyc2enyl | 1.07628e-16 (0.00182 ) | 1.07628e-16 (0.00182 ) |
| H-abstraction to cyclenyl | 5.62537e-19 (9.49e-06) | 5.62537e-19 (9.49e-06) |

| species                       | PYtrue      | Cumul    | PYeffective | Cumul    |
|-------------------------------|-------------|----------|-------------|----------|
| Indene+H                      | 0.997536    | 0.997536 | 0.997536    | 0.997536 |
| Benzene+cycloprop-2-enylidene | 0.00181637  | 0.999353 | 0.00181637  | 0.999353 |
| PhCHCCH2+H                    | 0.000599213 | 0.999952 | 0.000599213 | 0.999952 |
| PhCCH+CH3                     | 1.07899e-05 | 0.999963 | 1.07899e-05 | 0.999963 |
| C2H2+PhCH2                    | 9.94973e-06 | 0.999973 | 9.94973e-06 | 0.999973 |
| Benzene+cycloprop-1-enylidene | 9.49359e-06 | 0.999982 | 9.49359e-06 | 0.999982 |
| PhCCCH3+H                     | 6.92725e-06 | 0.999989 | 6.92725e-06 | 0.999989 |
| Ph+MeAc                       | 6.69436e-06 | 0.999996 | 6.69436e-06 | 0.999996 |
| rad67                         | 1.91404e-06 | 0.999998 | 1.91404e-06 | 0.999998 |
| Ph+Allene                     | 1.02854e-06 | 0.999999 | 1.02854e-06 | 0.999999 |
| rad35                         | 8.00939e-07 | 0.999999 | 8.00939e-07 | 0.999999 |
| PhCH2CCH+H                    | 1.75897e-07 | 1.000000 | 1.75897e-07 | 1.000000 |
| PAH7+H                        | 9.96917e-08 | 1.000000 | 9.96917e-08 | 1.000000 |
| rad37                         | 2.86985e-08 | 1.000000 | 2.86985e-08 | 1.000000 |
| rad39                         | 2.78945e-08 | 1.000000 | 2.78945e-08 | 1.000000 |
| rad30                         | 1.58794e-08 | 1.000000 | 1.58794e-08 | 1.000000 |
| PAH9+H                        | 1.63684e-09 | 1.000000 | 1.63684e-09 | 1.000000 |
| rad38                         | 8.60335e-10 | 1.000000 | 8.60335e-10 | 1.000000 |
| PhcycC3H3_A+H                 | 4.09102e-10 | 1.000000 | 4.09102e-10 | 1.000000 |
| PAH10+CH3                     | 2.45221e-10 | 1.000000 | 2.45221e-10 | 1.000000 |
| rad60syn                      | 1.25085e-10 | 1.000000 | 1.25085e-10 | 1.000000 |
| PAH3+H                        | 1.05828e-10 | 1.000000 | 1.05828e-10 | 1.000000 |
| rad60anti                     | 6.43937e-11 | 1.000000 | 6.43937e-11 | 1.000000 |
| rad46                         | 5.94068e-11 | 1.000000 | 5.94068e-11 | 1.000000 |
| rad59                         | 1.93817e-11 | 1.000000 | 1.93817e-11 | 1.000000 |
| PhcycC3H3_B+H                 | 1.41415e-11 | 1.000000 | 1.41415e-11 | 1.000000 |
| Phenyl+cycC3H4                | 1.07882e-11 | 1.000000 | 0.000000    | 1.000000 |
| rad54                         | 8.89606e-12 | 1.000000 | 8.89606e-12 | 1.000000 |
| rad43                         | 6.83075e-12 | 1.000000 | 6.83075e-12 | 1.000000 |
| rad62                         | 1.51159e-12 | 1.000000 | 1.51159e-12 | 1.000000 |
| rad50                         | 1.17696e-12 | 1.000000 | 1.17696e-12 | 1.000000 |
| rad70                         | 3.87563e-13 | 1.000000 | 3.87563e-13 | 1.000000 |
| PAH1+H                        | 2.83537e-13 | 1.000000 | 2.83537e-13 | 1.000000 |
| rad55                         | 1.69857e-13 | 1.000000 | 1.69857e-13 | 1.000000 |
| rad52                         | 1.66060e-14 | 1.000000 | 1.66060e-14 | 1.000000 |
| rad34                         | 1.64058e-14 | 1.000000 | 1.64058e-14 | 1.000000 |
| rad58                         | 1.50872e-14 | 1.000000 | 1.50872e-14 | 1.000000 |
| rad51                         | 1.01582e-14 | 1.000000 | 1.01582e-14 | 1.000000 |
| rad41                         | 4.78440e-15 | 1.000000 | 4.78440e-15 | 1.000000 |
| rad42                         | 2.42635e-15 | 1.000000 | 2.42635e-15 | 1.000000 |
| rad65                         | 2.87409e-16 | 1.000000 | 2.87409e-16 | 1.000000 |
| rad53                         | 1.82136e-16 | 1.000000 | 1.82136e-16 | 1.000000 |
| rad64                         | 6.86552e-17 | 1.000000 | 6.86552e-17 | 1.000000 |
| rad61                         | 3.85257e-17 | 1.000000 | 3.85257e-17 | 1.000000 |
| rad56                         | 4.20810e-18 | 1.000000 | 4.20810e-18 | 1.000000 |
| rad68syn                      | 5.79184e-19 | 1.000000 | 5.79184e-19 | 1.000000 |
| rad68anti                     | 4.21603e-19 | 1.000000 | 4.21603e-19 | 1.000000 |
| rad40syn                      | 1.84909e-20 | 1.000000 | 1.84909e-20 | 1.000000 |
| rad40anti                     | 1.45861e-20 | 1.000000 | 1.45861e-20 | 1.000000 |
| PAH8+H                        | 5.99118e-21 | 1.000000 | 5.99118e-21 | 1.000000 |
| rad73                         | 7.86975e-22 | 1.000000 | 7.86975e-22 | 1.000000 |
| rad71                         | 1.54165e-23 | 1.000000 | 1.54165e-23 | 1.000000 |
| rad19anti                     | 1.86169e-24 | 1.000000 | 1.86169e-24 | 1.000000 |
| rad6                          | 1.29118e-24 | 1.000000 | 1.29118e-24 | 1.000000 |
| rad2                          | 7.00585e-27 | 1.000000 | 7.00585e-27 | 1.000000 |
| rad1                          | 5.44569e-28 | 1.000000 | 5.44569e-28 | 1.000000 |
| rad10                         | 3.74167e-28 | 1.000000 | 3.74167e-28 | 1.000000 |
| rad28                         | 3.59284e-28 | 1.000000 | 3.59284e-28 | 1.000000 |
| rad26                         | 3.57547e-28 | 1.000000 | 3.57547e-28 | 1.000000 |
| rad7                          | 9.84657e-29 | 1.000000 | 9.84657e-29 | 1.000000 |
| rad3                          | 3.18525e-29 | 1.000000 | 3.18525e-29 | 1.000000 |
| rad11                         | 2.42444e-29 | 1.000000 | 2.42444e-29 | 1.000000 |
| rad4                          | 1.70232e-29 | 1.000000 | 1.70232e-29 | 1.000000 |
| rad9                          | 9.45574e-30 | 1.000000 | 9.45574e-30 | 1.000000 |
| rad47                         | 3.77537e-30 | 1.000000 | 3.77537e-30 | 1.000000 |
| rad31                         | 1.07023e-30 | 1.000000 | 1.07023e-30 | 1.000000 |
| rad13                         | 5.66543e-31 | 1.000000 | 5.66543e-31 | 1.000000 |
| rad19syn                      | 1.62279e-32 | 1.000000 | 1.62279e-32 | 1.000000 |
| rad15                         | 4.31435e-33 | 1.000000 | 4.31435e-33 | 1.000000 |
| rad14                         | 2.26194e-33 | 1.000000 | 2.26194e-33 | 1.000000 |

|       |             |          |             |          |
|-------|-------------|----------|-------------|----------|
| rad23 | 1.97375e-33 | 1.000000 | 1.97375e-33 | 1.000000 |
| rad27 | 1.66275e-33 | 1.000000 | 1.66275e-33 | 1.000000 |
| rad33 | 1.10287e-33 | 1.000000 | 1.10287e-33 | 1.000000 |
| rad25 | 5.46020e-34 | 1.000000 | 5.46020e-34 | 1.000000 |
| rad45 | 2.22697e-35 | 1.000000 | 2.22697e-35 | 1.000000 |
| rad36 | 1.47649e-36 | 1.000000 | 1.47649e-36 | 1.000000 |
| rad5  | 1.76094e-37 | 1.000000 | 1.76094e-37 | 1.000000 |
| rad12 | 7.53441e-38 | 1.000000 | 7.53441e-38 | 1.000000 |
| rad22 | 4.58157e-38 | 1.000000 | 4.58157e-38 | 1.000000 |
| rad20 | 1.56836e-38 | 1.000000 | 1.56836e-38 | 1.000000 |
| rad21 | 1.28573e-38 | 1.000000 | 1.28573e-38 | 1.000000 |
| rad18 | 5.73022e-41 | 1.000000 | 5.73022e-41 | 1.000000 |
| rad24 | 4.03318e-43 | 1.000000 | 4.03318e-43 | 1.000000 |
| rad8  | 1.69031e-59 | 1.000000 | 1.69031e-59 | 1.000000 |

0.100000000E-04 Pa, 400.000000 K

| Rate constant             | True (fraction)        | Effective (fraction)   |
|---------------------------|------------------------|------------------------|
| Total                     | 1.29463e-13 (1.00 )    | 1.29463e-13 (1.00 )    |
| Formation of rad19        | 1.28526e-13 (0.993 )   | 1.28526e-13 (0.993 )   |
| H-abstraction to cyc2enyl | 9.19357e-16 (0.00710 ) | 9.19357e-16 (0.00710 ) |
| H-abstraction to cyclenyl | 1.69485e-17 (0.000131) | 1.69485e-17 (0.000131) |

| species                       | PYtrue      | Cumul    | PYeffective | Cumul    |
|-------------------------------|-------------|----------|-------------|----------|
| Indene+H                      | 0.991683    | 0.991683 | 0.991683    | 0.991683 |
| Benzene+cycloprop-2-enylidene | 0.00710133  | 0.998784 | 0.00710133  | 0.998784 |
| PhCHCCH2+H                    | 0.00100586  | 0.999790 | 0.00100586  | 0.999790 |
| Benzene+cycloprop-1-enylidene | 0.000130914 | 0.999921 | 0.000130914 | 0.999921 |
| C2H2+PhCH2                    | 2.22468e-05 | 0.999943 | 2.22468e-05 | 0.999943 |
| PhCCH+CH3                     | 1.95098e-05 | 0.999963 | 1.95098e-05 | 0.999963 |
| Ph+MeAc                       | 1.45179e-05 | 0.999977 | 1.45179e-05 | 0.999977 |
| PhCCCH3+H                     | 1.31952e-05 | 0.999990 | 1.31952e-05 | 0.999990 |
| rad67                         | 4.22167e-06 | 0.999994 | 4.22167e-06 | 0.999994 |
| Ph+Allene                     | 2.97391e-06 | 0.999997 | 2.97391e-06 | 0.999997 |
| rad35                         | 1.68909e-06 | 0.999999 | 1.68909e-06 | 0.999999 |
| PhCH2CCH+H                    | 6.93048e-07 | 1.000000 | 6.93048e-07 | 1.000000 |
| PAH7+H                        | 2.89758e-07 | 1.000000 | 2.89758e-07 | 1.000000 |
| rad37                         | 8.82204e-08 | 1.000000 | 8.82204e-08 | 1.000000 |
| rad39                         | 7.05188e-08 | 1.000000 | 7.05188e-08 | 1.000000 |
| rad30                         | 3.41246e-08 | 1.000000 | 3.41246e-08 | 1.000000 |
| PAH9+H                        | 5.67069e-09 | 1.000000 | 5.67069e-09 | 1.000000 |
| PhcycC3H3_A+H                 | 4.88900e-09 | 1.000000 | 4.88900e-09 | 1.000000 |
| rad38                         | 3.07435e-09 | 1.000000 | 3.07435e-09 | 1.000000 |
| PAH10+CH3                     | 1.94150e-09 | 1.000000 | 1.94150e-09 | 1.000000 |
| PAH3+H                        | 5.34449e-10 | 1.000000 | 5.34449e-10 | 1.000000 |
| PhcycC3H3_B+H                 | 4.15151e-10 | 1.000000 | 4.15151e-10 | 1.000000 |
| rad60syn                      | 3.79130e-10 | 1.000000 | 3.79130e-10 | 1.000000 |
| rad46                         | 2.31290e-10 | 1.000000 | 2.31290e-10 | 1.000000 |
| Phenyl+cycC3H4                | 2.22328e-10 | 1.000000 | 0.000000    | 1.000000 |
| rad60anti                     | 2.01850e-10 | 1.000000 | 2.01850e-10 | 1.000000 |
| rad59                         | 8.49299e-11 | 1.000000 | 8.49299e-11 | 1.000000 |
| rad54                         | 6.39706e-11 | 1.000000 | 6.39706e-11 | 1.000000 |
| rad43                         | 3.46932e-11 | 1.000000 | 3.46932e-11 | 1.000000 |
| rad50                         | 8.28672e-12 | 1.000000 | 8.28672e-12 | 1.000000 |
| rad62                         | 7.28467e-12 | 1.000000 | 7.28467e-12 | 1.000000 |
| rad70                         | 3.85328e-12 | 1.000000 | 3.85328e-12 | 1.000000 |
| PAH1+H                        | 3.61003e-12 | 1.000000 | 3.61003e-12 | 1.000000 |
| rad55                         | 1.60055e-12 | 1.000000 | 1.60055e-12 | 1.000000 |
| rad34                         | 2.43952e-13 | 1.000000 | 2.43952e-13 | 1.000000 |
| rad52                         | 1.72576e-13 | 1.000000 | 1.72576e-13 | 1.000000 |
| rad58                         | 1.69180e-13 | 1.000000 | 1.69180e-13 | 1.000000 |
| rad51                         | 1.42864e-13 | 1.000000 | 1.42864e-13 | 1.000000 |
| rad41                         | 6.83260e-14 | 1.000000 | 6.83260e-14 | 1.000000 |
| rad42                         | 2.71734e-14 | 1.000000 | 2.71734e-14 | 1.000000 |
| rad53                         | 6.88019e-15 | 1.000000 | 6.88019e-15 | 1.000000 |
| rad65                         | 4.39173e-15 | 1.000000 | 4.39173e-15 | 1.000000 |
| rad61                         | 3.43038e-15 | 1.000000 | 3.43038e-15 | 1.000000 |
| rad64                         | 3.05834e-15 | 1.000000 | 3.05834e-15 | 1.000000 |
| rad56                         | 5.30924e-16 | 1.000000 | 5.30924e-16 | 1.000000 |
| rad68syn                      | 7.48244e-17 | 1.000000 | 7.48244e-17 | 1.000000 |
| rad68anti                     | 5.24834e-17 | 1.000000 | 5.24834e-17 | 1.000000 |
| rad40syn                      | 6.39130e-18 | 1.000000 | 6.39130e-18 | 1.000000 |
| PAH8+H                        | 5.94551e-18 | 1.000000 | 5.94551e-18 | 1.000000 |
| rad19anti                     | 4.76696e-18 | 1.000000 | 4.76696e-18 | 1.000000 |
| rad40anti                     | 4.74371e-18 | 1.000000 | 4.74371e-18 | 1.000000 |
| rad73                         | 4.85676e-19 | 1.000000 | 4.85676e-19 | 1.000000 |
| rad6                          | 1.36022e-19 | 1.000000 | 1.36022e-19 | 1.000000 |
| rad71                         | 4.97335e-20 | 1.000000 | 4.97335e-20 | 1.000000 |

|          |             |         |             |         |
|----------|-------------|---------|-------------|---------|
| rad2     | 2.11255e-20 | 1.00000 | 2.11255e-20 | 1.00000 |
| rad23    | 2.42965e-21 | 1.00000 | 2.42965e-21 | 1.00000 |
| rad1     | 1.96610e-21 | 1.00000 | 1.96610e-21 | 1.00000 |
| rad10    | 1.25121e-21 | 1.00000 | 1.25121e-21 | 1.00000 |
| rad9     | 4.90164e-22 | 1.00000 | 4.90164e-22 | 1.00000 |
| rad3     | 2.79560e-22 | 1.00000 | 2.79560e-22 | 1.00000 |
| rad45    | 2.44646e-22 | 1.00000 | 2.44646e-22 | 1.00000 |
| rad4     | 1.47266e-22 | 1.00000 | 1.47266e-22 | 1.00000 |
| rad26    | 5.83434e-23 | 1.00000 | 5.83434e-23 | 1.00000 |
| rad19syn | 2.04434e-23 | 1.00000 | 2.04434e-23 | 1.00000 |
| rad28    | 1.69333e-23 | 1.00000 | 1.69333e-23 | 1.00000 |
| rad7     | 1.26052e-23 | 1.00000 | 1.26052e-23 | 1.00000 |
| rad36    | 9.43393e-24 | 1.00000 | 9.43393e-24 | 1.00000 |
| rad31    | 5.03677e-24 | 1.00000 | 5.03677e-24 | 1.00000 |
| rad11    | 3.01363e-24 | 1.00000 | 3.01363e-24 | 1.00000 |
| rad72    | 7.32152e-25 | 1.00000 | 7.32152e-25 | 1.00000 |
| rad15    | 3.08554e-25 | 1.00000 | 3.08554e-25 | 1.00000 |
| rad13    | 7.69016e-26 | 1.00000 | 7.69016e-26 | 1.00000 |
| rad22    | 2.77492e-26 | 1.00000 | 2.77492e-26 | 1.00000 |
| rad12    | 1.91220e-27 | 1.00000 | 1.91220e-27 | 1.00000 |
| rad47    | 7.65193e-28 | 1.00000 | 7.65193e-28 | 1.00000 |
| rad27    | 5.28918e-28 | 1.00000 | 5.28918e-28 | 1.00000 |
| rad14    | 2.58965e-28 | 1.00000 | 2.58965e-28 | 1.00000 |
| rad33    | 1.90643e-28 | 1.00000 | 1.90643e-28 | 1.00000 |
| rad25    | 1.25979e-28 | 1.00000 | 1.25979e-28 | 1.00000 |
| rad21    | 5.45441e-31 | 1.00000 | 5.45441e-31 | 1.00000 |
| rad20    | 2.89999e-31 | 1.00000 | 2.89999e-31 | 1.00000 |
| rad5     | 1.68719e-31 | 1.00000 | 1.68719e-31 | 1.00000 |
| rad24    | 2.83370e-32 | 1.00000 | 2.83370e-32 | 1.00000 |
| rad18    | 3.05545e-33 | 1.00000 | 3.05545e-33 | 1.00000 |
| rad8     | 6.65009e-43 | 1.00000 | 6.65009e-43 | 1.00000 |

0.100000000E-04 Pa, 500.000000 K

| Rate constant             | True (fraction)        | Effective (fraction)   |
|---------------------------|------------------------|------------------------|
| Total                     | 2.52837e-13 (1.00 )    | 2.52837e-13 (1.00 )    |
| Formation of rad19        | 2.47941e-13 (0.981 )   | 2.47941e-13 (0.981 )   |
| H-abstraction to cyc2enyl | 4.69058e-15 (0.0186 )  | 4.69058e-15 (0.0186 )  |
| H-abstraction to cyclenyl | 2.05381e-16 (0.000812) | 2.05381e-16 (0.000812) |

| species                       | PYtrue      | Cumul    | PYeffective | Cumul    |
|-------------------------------|-------------|----------|-------------|----------|
| Indene+H                      | 0.978428    | 0.978428 | 0.978428    | 0.978428 |
| Benzene+cycloprop-2-enylidene | 0.0185518   | 0.996979 | 0.0185518   | 0.996979 |
| PhCHCCH2+H                    | 0.00202477  | 0.999004 | 0.00202477  | 0.999004 |
| Benzene+cycloprop-1-enylidene | 0.000812306 | 0.999816 | 0.000812306 | 0.999816 |
| C2H2+PhCH2                    | 5.13363e-05 | 0.999868 | 5.13363e-05 | 0.999868 |
| PhCCH+CH3                     | 3.71182e-05 | 0.999905 | 3.71182e-05 | 0.999905 |
| Ph+MeAc                       | 3.63101e-05 | 0.999941 | 3.63101e-05 | 0.999941 |
| PhCCCH3+H                     | 2.84449e-05 | 0.999970 | 2.84449e-05 | 0.999970 |
| Ph+Allene                     | 1.09470e-05 | 0.999981 | 1.09470e-05 | 0.999981 |
| rad67                         | 1.05822e-05 | 0.999991 | 1.05822e-05 | 0.999991 |
| rad35                         | 4.10935e-06 | 0.999995 | 4.10935e-06 | 0.999995 |
| PhCH2CCH+H                    | 2.95392e-06 | 0.999998 | 2.95392e-06 | 0.999998 |
| PAH7+H                        | 8.51564e-07 | 0.999999 | 8.51564e-07 | 0.999999 |
| rad37                         | 2.86678e-07 | 0.999999 | 2.86678e-07 | 0.999999 |
| rad39                         | 2.02118e-07 | 1.000000 | 2.02118e-07 | 1.000000 |
| rad30                         | 8.94923e-08 | 1.000000 | 8.94923e-08 | 1.000000 |
| PhcycC3H3_A+H                 | 5.02850e-08 | 1.000000 | 5.02850e-08 | 1.000000 |
| PAH9+H                        | 2.06879e-08 | 1.000000 | 2.06879e-08 | 1.000000 |
| PAH10+CH3                     | 1.44052e-08 | 1.000000 | 1.44052e-08 | 1.000000 |
| rad38                         | 1.31834e-08 | 1.000000 | 1.31834e-08 | 1.000000 |
| PhcycC3H3_B+H                 | 7.81107e-09 | 1.000000 | 7.81107e-09 | 1.000000 |
| Phenyl+cycC3H4                | 3.55660e-09 | 1.000000 | 0.000000    | 1.000000 |
| PAH3+H                        | 2.97649e-09 | 1.000000 | 2.97649e-09 | 1.000000 |
| rad60syn                      | 1.43183e-09 | 1.000000 | 1.43183e-09 | 1.000000 |
| rad46                         | 1.04913e-09 | 1.000000 | 1.04913e-09 | 1.000000 |
| rad60anti                     | 7.84373e-10 | 1.000000 | 7.84373e-10 | 1.000000 |
| rad54                         | 4.68691e-10 | 1.000000 | 4.68691e-10 | 1.000000 |
| rad59                         | 4.42102e-10 | 1.000000 | 4.42102e-10 | 1.000000 |
| rad43                         | 1.96278e-10 | 1.000000 | 1.96278e-10 | 1.000000 |
| rad50                         | 6.65687e-11 | 1.000000 | 6.65687e-11 | 1.000000 |
| PAH1+H                        | 4.68911e-11 | 1.000000 | 4.68911e-11 | 1.000000 |
| rad62                         | 3.77646e-11 | 1.000000 | 3.77646e-11 | 1.000000 |
| rad70                         | 3.76454e-11 | 1.000000 | 3.76454e-11 | 1.000000 |
| rad55                         | 1.50995e-11 | 1.000000 | 1.50995e-11 | 1.000000 |
| rad34                         | 3.22092e-12 | 1.000000 | 3.22092e-12 | 1.000000 |
| rad51                         | 2.08196e-12 | 1.000000 | 2.08196e-12 | 1.000000 |
| rad58                         | 2.05092e-12 | 1.000000 | 2.05092e-12 | 1.000000 |

|           |             |          |             |          |
|-----------|-------------|----------|-------------|----------|
| rad52     | 1.88540e-12 | 1.000000 | 1.88540e-12 | 1.000000 |
| rad41     | 8.63972e-13 | 1.000000 | 8.63972e-13 | 1.000000 |
| rad42     | 2.74850e-13 | 1.000000 | 2.74850e-13 | 1.000000 |
| rad53     | 1.70507e-13 | 1.000000 | 1.70507e-13 | 1.000000 |
| rad61     | 1.40668e-13 | 1.000000 | 1.40668e-13 | 1.000000 |
| rad64     | 7.73135e-14 | 1.000000 | 7.73135e-14 | 1.000000 |
| rad65     | 6.64224e-14 | 1.000000 | 6.64224e-14 | 1.000000 |
| rad56     | 2.62115e-14 | 1.000000 | 2.62115e-14 | 1.000000 |
| rad68syn  | 3.88259e-15 | 1.000000 | 3.88259e-15 | 1.000000 |
| rad68anti | 2.67414e-15 | 1.000000 | 2.67414e-15 | 1.000000 |
| PAH8+H    | 8.47559e-16 | 1.000000 | 8.47559e-16 | 1.000000 |
| rad19anti | 6.68017e-16 | 1.000000 | 6.68017e-16 | 1.000000 |
| rad40syn  | 5.55784e-16 | 1.000000 | 5.55784e-16 | 1.000000 |
| rad40anti | 4.06573e-16 | 1.000000 | 4.06573e-16 | 1.000000 |
| rad73     | 6.83537e-17 | 1.000000 | 6.83537e-17 | 1.000000 |
| rad6      | 2.32498e-17 | 1.000000 | 2.32498e-17 | 1.000000 |
| rad71     | 1.35738e-17 | 1.000000 | 1.35738e-17 | 1.000000 |
| rad23     | 1.11971e-17 | 1.000000 | 1.11971e-17 | 1.000000 |
| rad2      | 8.81888e-18 | 1.000000 | 8.81888e-18 | 1.000000 |
| rad45     | 2.22432e-18 | 1.000000 | 2.22432e-18 | 1.000000 |
| rad1      | 1.06100e-18 | 1.000000 | 1.06100e-18 | 1.000000 |
| rad10     | 4.07705e-19 | 1.000000 | 4.07705e-19 | 1.000000 |
| rad9      | 2.39472e-19 | 1.000000 | 2.39472e-19 | 1.000000 |
| rad3      | 1.49827e-19 | 1.000000 | 1.49827e-19 | 1.000000 |
| rad19syn  | 1.45990e-19 | 1.000000 | 1.45990e-19 | 1.000000 |
| rad36     | 1.21948e-19 | 1.000000 | 1.21948e-19 | 1.000000 |
| rad4      | 8.57589e-20 | 1.000000 | 8.57589e-20 | 1.000000 |
| rad26     | 5.49456e-21 | 1.000000 | 5.49456e-21 | 1.000000 |
| rad7      | 2.31741e-21 | 1.000000 | 2.31741e-21 | 1.000000 |
| rad72     | 1.99299e-21 | 1.000000 | 1.99299e-21 | 1.000000 |
| rad31     | 1.77645e-21 | 1.000000 | 1.77645e-21 | 1.000000 |
| rad28     | 1.48791e-21 | 1.000000 | 1.48791e-21 | 1.000000 |
| rad11     | 5.78678e-22 | 1.000000 | 5.78678e-22 | 1.000000 |
| rad15     | 1.61562e-22 | 1.000000 | 1.61562e-22 | 1.000000 |
| rad22     | 5.40360e-23 | 1.000000 | 5.40360e-23 | 1.000000 |
| rad12     | 1.85421e-23 | 1.000000 | 1.85421e-23 | 1.000000 |
| rad13     | 1.56105e-23 | 1.000000 | 1.56105e-23 | 1.000000 |
| rad27     | 5.88385e-26 | 1.000000 | 5.88385e-26 | 1.000000 |
| rad47     | 5.02583e-26 | 1.000000 | 5.02583e-26 | 1.000000 |
| rad33     | 4.35952e-26 | 1.000000 | 4.35952e-26 | 1.000000 |
| rad14     | 1.53999e-26 | 1.000000 | 1.53999e-26 | 1.000000 |
| rad25     | 1.72619e-27 | 1.000000 | 1.72619e-27 | 1.000000 |
| rad21     | 1.59273e-28 | 1.000000 | 1.59273e-28 | 1.000000 |
| rad20     | 9.52147e-29 | 1.000000 | 9.52147e-29 | 1.000000 |
| rad24     | 5.46932e-29 | 1.000000 | 5.46932e-29 | 1.000000 |
| rad18     | 1.37010e-30 | 1.000000 | 1.37010e-30 | 1.000000 |
| rad5      | 1.88304e-31 | 1.000000 | 1.88304e-31 | 1.000000 |
| rad8      | 1.56286e-38 | 1.000000 | 1.56286e-38 | 1.000000 |

0.100000000E-04 Pa, 600.000000 K

| Rate constant             | True (fraction)        | Effective (fraction)   |
|---------------------------|------------------------|------------------------|
| Total                     | 4.35570e-13 (1.00 )    | 4.35570e-13 (1.00 )    |
| Formation of rad19        | 4.18892e-13 (0.962 )   | 4.18892e-13 (0.962 )   |
| H-abstraction to cyc2enyl | 1.54751e-14 (0.0355 )  | 1.54751e-14 (0.0355 )  |
| H-abstraction to cyclenyl | 1.20343e-15 (0.00276 ) | 1.20343e-15 (0.00276 ) |

| species                       | PYtrue      | Cumul    | PYeffective | Cumul    |
|-------------------------------|-------------|----------|-------------|----------|
| Indene+H                      | 0.957276    | 0.957276 | 0.957276    | 0.957276 |
| Benzene+cycloprop-2-enylidene | 0.0355285   | 0.992805 | 0.0355285   | 0.992805 |
| PhCHCCH2+H                    | 0.00402172  | 0.996826 | 0.00402172  | 0.996826 |
| Benzene+cycloprop-1-enylidene | 0.00276289  | 0.999589 | 0.00276289  | 0.999589 |
| C2H2+PhCH2                    | 0.000111945 | 0.999701 | 0.000111945 | 0.999701 |
| Ph+MeAc                       | 8.57420e-05 | 0.999787 | 8.57420e-05 | 0.999787 |
| PhCCH+CH3                     | 6.75064e-05 | 0.999854 | 6.75064e-05 | 0.999854 |
| PhCCCH3+H                     | 5.90383e-05 | 0.999913 | 5.90383e-05 | 0.999913 |
| Ph+Allene                     | 3.56628e-05 | 0.999949 | 3.56628e-05 | 0.999949 |
| rad67                         | 2.54029e-05 | 0.999975 | 2.54029e-05 | 0.999975 |
| PhCH2CCH+H                    | 1.09199e-05 | 0.999985 | 1.09199e-05 | 0.999985 |
| rad35                         | 9.63305e-06 | 0.999995 | 9.63305e-06 | 0.999995 |
| PAH7+H                        | 2.26706e-06 | 0.999997 | 2.26706e-06 | 0.999997 |
| rad37                         | 8.64904e-07 | 0.999998 | 8.64904e-07 | 0.999998 |
| rad39                         | 5.20249e-07 | 0.999999 | 5.20249e-07 | 0.999999 |
| PhcycC3H3_A+H                 | 3.56529e-07 | 0.999999 | 3.56529e-07 | 0.999999 |
| rad30                         | 2.27441e-07 | 0.999999 | 2.27441e-07 | 0.999999 |
| PAH10+CH3                     | 8.50920e-08 | 0.999999 | 8.50920e-08 | 0.999999 |
| PhcycC3H3_B+H                 | 8.43895e-08 | 0.999999 | 8.43895e-08 | 0.999999 |
| PAH9+H                        | 7.13070e-08 | 1.000000 | 7.13070e-08 | 1.000000 |



|                |             |          |             |          |
|----------------|-------------|----------|-------------|----------|
| rad38          | 5.21311e-08 | 1.000000 | 5.21311e-08 | 1.000000 |
| Phenyl+cycC3H4 | 3.58023e-08 | 1.000000 | 0.00000     | 1.000000 |
| PAH3+H         | 1.45691e-08 | 1.000000 | 1.45691e-08 | 1.000000 |
| rad60syn       | 5.03972e-09 | 1.000000 | 5.03972e-09 | 1.000000 |
| rad46          | 4.37621e-09 | 1.000000 | 4.37621e-09 | 1.000000 |
| rad60anti      | 2.82886e-09 | 1.000000 | 2.82886e-09 | 1.000000 |
| rad54          | 2.63022e-09 | 1.000000 | 2.63022e-09 | 1.000000 |
| rad59          | 2.03126e-09 | 1.000000 | 2.03126e-09 | 1.000000 |
| rad43          | 9.14301e-10 | 1.000000 | 9.14302e-10 | 1.000000 |
| rad50          | 4.49074e-10 | 1.000000 | 4.49074e-10 | 1.000000 |
| PAH1+H         | 4.05905e-10 | 1.000000 | 4.05905e-10 | 1.000000 |
| rad70          | 2.63826e-10 | 1.000000 | 2.63826e-10 | 1.000000 |
| rad62          | 1.58022e-10 | 1.000000 | 1.58022e-10 | 1.000000 |
| rad55          | 1.01573e-10 | 1.000000 | 1.01573e-10 | 1.000000 |
| rad34          | 2.81348e-11 | 1.000000 | 2.81348e-11 | 1.000000 |
| rad51          | 2.21630e-11 | 1.000000 | 2.21630e-11 | 1.000000 |
| rad58          | 1.79744e-11 | 1.000000 | 1.79744e-11 | 1.000000 |
| rad52          | 1.61050e-11 | 1.000000 | 1.61050e-11 | 1.000000 |
| rad41          | 7.27827e-12 | 1.000000 | 7.27827e-12 | 1.000000 |
| rad61          | 2.69080e-12 | 1.000000 | 2.69080e-12 | 1.000000 |
| rad53          | 2.26526e-12 | 1.000000 | 2.26526e-12 | 1.000000 |
| rad42          | 1.88131e-12 | 1.000000 | 1.88131e-12 | 1.000000 |
| rad64          | 9.96176e-13 | 1.000000 | 9.96176e-13 | 1.000000 |
| rad65          | 7.15323e-13 | 1.000000 | 7.15323e-13 | 1.000000 |
| rad56          | 5.47638e-13 | 1.000000 | 5.47638e-13 | 1.000000 |
| rad68syn       | 8.54715e-14 | 1.000000 | 8.54715e-14 | 1.000000 |
| rad68anti      | 5.81389e-14 | 1.000000 | 5.81389e-14 | 1.000000 |
| PAH8+H         | 3.69241e-14 | 1.000000 | 3.69241e-14 | 1.000000 |
| rad40syn       | 1.73285e-14 | 1.000000 | 1.73285e-14 | 1.000000 |
| rad40anti      | 1.26417e-14 | 1.000000 | 1.26417e-14 | 1.000000 |
| rad19anti      | 4.93441e-15 | 1.000000 | 4.93441e-15 | 1.000000 |
| rad73          | 3.37842e-15 | 1.000000 | 3.37842e-15 | 1.000000 |
| rad71          | 1.04456e-15 | 1.000000 | 1.04456e-15 | 1.000000 |
| rad23          | 6.01965e-16 | 1.000000 | 6.01965e-16 | 1.000000 |
| rad6           | 4.81817e-16 | 1.000000 | 4.81817e-16 | 1.000000 |
| rad2           | 3.77780e-16 | 1.000000 | 3.77780e-16 | 1.000000 |
| rad45          | 1.28312e-16 | 1.000000 | 1.28312e-16 | 1.000000 |
| rad9           | 9.72297e-17 | 1.000000 | 9.72297e-17 | 1.000000 |
| rad1           | 6.27975e-17 | 1.000000 | 6.27975e-17 | 1.000000 |
| rad19syn       | 1.52297e-17 | 1.000000 | 1.52297e-17 | 1.000000 |
| rad36          | 1.40806e-17 | 1.000000 | 1.40806e-17 | 1.000000 |
| rad10          | 1.07790e-17 | 1.000000 | 1.07790e-17 | 1.000000 |
| rad3           | 6.16702e-18 | 1.000000 | 6.16702e-18 | 1.000000 |
| rad4           | 4.24630e-18 | 1.000000 | 4.24630e-18 | 1.000000 |
| rad72          | 6.46701e-19 | 1.000000 | 6.46701e-19 | 1.000000 |
| rad12          | 1.38524e-19 | 1.000000 | 1.38524e-19 | 1.000000 |
| rad26          | 8.55150e-20 | 1.000000 | 8.55150e-20 | 1.000000 |
| rad15          | 6.32709e-20 | 1.000000 | 6.32709e-20 | 1.000000 |
| rad7           | 5.35282e-20 | 1.000000 | 5.35282e-20 | 1.000000 |
| rad31          | 3.24820e-20 | 1.000000 | 3.24820e-20 | 1.000000 |
| rad28          | 2.35290e-20 | 1.000000 | 2.35290e-20 | 1.000000 |
| rad11          | 1.42719e-20 | 1.000000 | 1.42719e-20 | 1.000000 |
| rad22          | 2.34531e-21 | 1.000000 | 2.34531e-21 | 1.000000 |
| rad13          | 4.30192e-22 | 1.000000 | 4.30192e-22 | 1.000000 |
| rad33          | 1.43409e-24 | 1.000000 | 1.43409e-24 | 1.000000 |
| rad47          | 1.30363e-24 | 1.000000 | 1.30363e-24 | 1.000000 |
| rad27          | 1.09260e-24 | 1.000000 | 1.09260e-24 | 1.000000 |
| rad14          | 2.18180e-25 | 1.000000 | 2.18180e-25 | 1.000000 |
| rad24          | 1.00446e-25 | 1.000000 | 1.00446e-25 | 1.000000 |
| rad21          | 4.73168e-26 | 1.000000 | 4.73168e-26 | 1.000000 |
| rad25          | 2.62646e-26 | 1.000000 | 2.62646e-26 | 1.000000 |
| rad20          | 1.54426e-26 | 1.000000 | 1.54426e-26 | 1.000000 |
| rad18          | 1.24477e-28 | 1.000000 | 1.24477e-28 | 1.000000 |
| rad5           | 2.92319e-31 | 1.000000 | 2.92319e-31 | 1.000000 |
| rad8           | 2.39366e-33 | 1.000000 | 2.39366e-33 | 1.000000 |

0.100000000E-04 Pa, 700.000000 K

| Rate constant                 | True (fraction)        | Effective (fraction)   |             |          |
|-------------------------------|------------------------|------------------------|-------------|----------|
| Total                         | 6.91694e-13 (1.00 )    | 6.91694e-13 (1.00 )    |             |          |
| Formation of rad19            | 6.47922e-13 (0.937 )   | 6.47922e-13 (0.937 )   |             |          |
| H-abstraction to cyc2enyl     | 3.91858e-14 (0.0567 )  | 3.91858e-14 (0.0567 )  |             |          |
| H-abstraction to cyclenyl     | 4.58543e-15 (0.00663 ) | 4.58542e-15 (0.00663 ) |             |          |
| species                       | PYtrue                 | Cumul                  | PYeffective | Cumul    |
| Indene+H                      | 0.928261               | 0.928261               | 0.928261    | 0.928261 |
| Benzene+cycloprop-2-enylidene | 0.0566520              | 0.984913               | 0.0566520   | 0.984913 |
| PhCHCCH2+H                    | 0.00759850             | 0.992512               | 0.00759851  | 0.992512 |

|                               |             |          |             |          |
|-------------------------------|-------------|----------|-------------|----------|
| Benzene+cycloprop-1-enylidene | 0.00662927  | 0.999141 | 0.00662927  | 0.999141 |
| C2H2+PhCH2                    | 0.000223367 | 0.999364 | 0.000223367 | 0.999364 |
| Ph+MeAc                       | 0.000184762 | 0.999549 | 0.000184762 | 0.999549 |
| PhCCH+CH3                     | 0.000114475 | 0.999663 | 0.000114475 | 0.999663 |
| PhCCCH3+H                     | 0.000114174 | 0.999778 | 0.000114174 | 0.999778 |
| Ph+Allene                     | 9.86533e-05 | 0.999876 | 9.86533e-05 | 0.999876 |
| rad67                         | 5.61617e-05 | 0.999932 | 5.61618e-05 | 0.999932 |
| PhCH2CCH+H                    | 3.37385e-05 | 0.999966 | 3.37385e-05 | 0.999966 |
| rad35                         | 2.09201e-05 | 0.999987 | 2.09202e-05 | 0.999987 |
| PAH7+H                        | 5.25052e-06 | 0.999992 | 5.25052e-06 | 0.999992 |
| rad37                         | 2.31770e-06 | 0.999995 | 2.31770e-06 | 0.999995 |
| PhcycC3H3_A+H                 | 1.84668e-06 | 0.999997 | 1.84668e-06 | 0.999997 |
| rad39                         | 1.15814e-06 | 0.999998 | 1.15814e-06 | 0.999998 |
| PhcycC3H3_B+H                 | 5.97889e-07 | 0.999998 | 5.97889e-07 | 0.999998 |
| rad30                         | 5.35177e-07 | 0.999999 | 5.35177e-07 | 0.999999 |
| PAH10+CH3                     | 3.93624e-07 | 0.999999 | 3.93624e-07 | 0.999999 |
| Phenyl+cycC3H4                | 2.47273e-07 | 0.999999 | 0.00000     | 0.999999 |
| PAH9+H                        | 2.20558e-07 | 1.000000 | 2.20558e-07 | 0.999999 |
| rad38                         | 1.79348e-07 | 1.000000 | 1.79348e-07 | 1.000000 |
| PAH3+H                        | 5.98815e-08 | 1.000000 | 5.98815e-08 | 1.000000 |
| rad46                         | 1.59383e-08 | 1.000000 | 1.59383e-08 | 1.000000 |
| rad60syn                      | 1.57198e-08 | 1.000000 | 1.57198e-08 | 1.000000 |
| rad54                         | 1.11959e-08 | 1.000000 | 1.11959e-08 | 1.000000 |
| rad60anti                     | 9.00502e-09 | 1.000000 | 9.00502e-09 | 1.000000 |
| rad59                         | 7.88061e-09 | 1.000000 | 7.88061e-09 | 1.000000 |
| rad43                         | 3.45953e-09 | 1.000000 | 3.45953e-09 | 1.000000 |
| PAH1+H                        | 2.45995e-09 | 1.000000 | 2.45995e-09 | 1.000000 |
| rad50                         | 2.44563e-09 | 1.000000 | 2.44563e-09 | 1.000000 |
| rad70                         | 1.34938e-09 | 1.000000 | 1.34938e-09 | 1.000000 |
| rad62                         | 5.31170e-10 | 1.000000 | 5.31170e-10 | 1.000000 |
| rad55                         | 4.95201e-10 | 1.000000 | 4.95201e-10 | 1.000000 |
| rad51                         | 1.72653e-10 | 1.000000 | 1.72653e-10 | 1.000000 |
| rad34                         | 1.70511e-10 | 1.000000 | 1.70511e-10 | 1.000000 |
| rad58                         | 1.15481e-10 | 1.000000 | 1.15481e-10 | 1.000000 |
| rad52                         | 1.05442e-10 | 1.000000 | 1.05442e-10 | 1.000000 |
| rad41                         | 4.33848e-11 | 1.000000 | 4.33848e-11 | 1.000000 |
| rad61                         | 2.93831e-11 | 1.000000 | 2.93831e-11 | 1.000000 |
| rad53                         | 1.83949e-11 | 1.000000 | 1.83949e-11 | 1.000000 |
| rad42                         | 9.22818e-12 | 1.000000 | 9.22818e-12 | 1.000000 |
| rad64                         | 7.68987e-12 | 1.000000 | 7.68987e-12 | 1.000000 |
| rad56                         | 6.14022e-12 | 1.000000 | 6.14022e-12 | 1.000000 |
| rad65                         | 5.56200e-12 | 1.000000 | 5.56200e-12 | 1.000000 |
| rad68syn                      | 1.01762e-12 | 1.000000 | 1.01762e-12 | 1.000000 |
| PAH8+H                        | 7.27467e-13 | 1.000000 | 7.27467e-13 | 1.000000 |
| rad68anti                     | 6.85898e-13 | 1.000000 | 6.85898e-13 | 1.000000 |
| rad40syn                      | 2.67923e-13 | 1.000000 | 2.67923e-13 | 1.000000 |
| rad40anti                     | 1.96404e-13 | 1.000000 | 1.96404e-13 | 1.000000 |
| rad73                         | 8.03991e-14 | 1.000000 | 8.03991e-14 | 1.000000 |
| rad9                          | 4.66378e-14 | 1.000000 | 4.66378e-14 | 1.000000 |
| rad71                         | 3.42969e-14 | 1.000000 | 3.42969e-14 | 1.000000 |
| rad19anti                     | 6.95729e-15 | 1.000000 | 6.95729e-15 | 1.000000 |
| rad23                         | 2.90022e-15 | 1.000000 | 2.90022e-15 | 1.000000 |
| rad2                          | 1.70112e-15 | 1.000000 | 1.70112e-15 | 1.000000 |
| rad6                          | 1.59397e-15 | 1.000000 | 1.59397e-15 | 1.000000 |
| rad45                         | 6.14498e-16 | 1.000000 | 6.14498e-16 | 1.000000 |
| rad1                          | 4.31587e-16 | 1.000000 | 4.31587e-16 | 1.000000 |
| rad12                         | 1.17947e-16 | 1.000000 | 1.17947e-16 | 1.000000 |
| rad19syn                      | 8.87889e-17 | 1.000000 | 8.87889e-17 | 1.000000 |
| rad36                         | 8.77707e-17 | 1.000000 | 8.77708e-17 | 1.000000 |
| rad72                         | 5.62377e-17 | 1.000000 | 5.62377e-17 | 1.000000 |
| rad10                         | 4.05257e-17 | 1.000000 | 4.05257e-17 | 1.000000 |
| rad3                          | 2.53420e-17 | 1.000000 | 2.53420e-17 | 1.000000 |
| rad15                         | 2.07103e-17 | 1.000000 | 2.07104e-17 | 1.000000 |
| rad4                          | 2.05006e-17 | 1.000000 | 2.05006e-17 | 1.000000 |
| rad26                         | 2.81033e-19 | 1.000000 | 2.81033e-19 | 1.000000 |
| rad7                          | 2.04566e-19 | 1.000000 | 2.04566e-19 | 1.000000 |
| rad31                         | 9.71078e-20 | 1.000000 | 9.71078e-20 | 1.000000 |
| rad28                         | 7.91035e-20 | 1.000000 | 7.91035e-20 | 1.000000 |
| rad11                         | 5.88999e-20 | 1.000000 | 5.88999e-20 | 1.000000 |
| rad22                         | 1.19907e-20 | 1.000000 | 1.19907e-20 | 1.000000 |
| rad13                         | 2.20960e-21 | 1.000000 | 2.20960e-21 | 1.000000 |
| rad24                         | 2.00387e-22 | 1.000000 | 2.00387e-22 | 1.000000 |
| rad21                         | 3.07250e-23 | 1.000000 | 3.07250e-23 | 1.000000 |
| rad33                         | 1.71238e-23 | 1.000000 | 1.71238e-23 | 1.000000 |
| rad47                         | 1.29142e-23 | 1.000000 | 1.29142e-23 | 1.000000 |
| rad20                         | 4.94961e-24 | 1.000000 | 4.94961e-24 | 1.000000 |
| rad27                         | 4.41983e-24 | 1.000000 | 4.41983e-24 | 1.000000 |
| rad14                         | 8.20526e-25 | 1.000000 | 8.20527e-25 | 1.000000 |
| rad25                         | 5.39850e-25 | 1.000000 | 5.39850e-25 | 1.000000 |
| rad18                         | 2.34882e-27 | 1.000000 | 2.34882e-27 | 1.000000 |

|      |             |          |             |          |
|------|-------------|----------|-------------|----------|
| rad8 | 5.34063e-28 | 1.000000 | 5.34063e-28 | 1.000000 |
| rad5 | 7.04241e-31 | 1.000000 | 7.04241e-31 | 1.000000 |

0.100000000E-04 Pa, 800.000000 K

=====

| Rate constant             | True (fraction)       | Effective (fraction)  |
|---------------------------|-----------------------|-----------------------|
| Total                     | 1.03759e-12 (1.00 )   | 1.03758e-12 (1.00 )   |
| Formation of rad19        | 9.41065e-13 (0.907 )  | 9.41063e-13 (0.907 )  |
| H-abstraction to cyc2enyl | 8.32953e-14 (0.0803 ) | 8.32953e-14 (0.0803 ) |
| H-abstraction to cyclenyl | 1.32261e-14 (0.0127 ) | 1.32261e-14 (0.0127 ) |

| species                       | PYtrue      | Cumul    | PYeffective | Cumul    |
|-------------------------------|-------------|----------|-------------|----------|
| Indene+H                      | 0.891851    | 0.891851 | 0.891852    | 0.891852 |
| Benzene+cycloprop-2-enylidene | 0.0802780   | 0.972129 | 0.0802781   | 0.972130 |
| PhCHCCH2+H                    | 0.0134622   | 0.985591 | 0.0134623   | 0.985592 |
| Benzene+cycloprop-1-enylidene | 0.0127470   | 0.998338 | 0.0127470   | 0.998339 |
| C2H2+PhCH2                    | 0.000407098 | 0.998746 | 0.000407098 | 0.998747 |
| Ph+MeAc                       | 0.000361138 | 0.999107 | 0.000361137 | 0.999108 |
| Ph+Allene                     | 0.000232338 | 0.999339 | 0.000232338 | 0.999340 |
| PhCCCH3+H                     | 0.000203971 | 0.999543 | 0.000203971 | 0.999544 |
| PhCCH+CH3                     | 0.000180552 | 0.999724 | 0.000180553 | 0.999725 |
| rad67                         | 0.000113174 | 0.999837 | 0.000113174 | 0.999838 |
| PhCH2CCH+H                    | 8.77930e-05 | 0.999924 | 8.77932e-05 | 0.999925 |
| rad35                         | 4.16128e-05 | 0.999966 | 4.16129e-05 | 0.999967 |
| PAH7+H                        | 1.05800e-05 | 0.999977 | 1.05800e-05 | 0.999978 |
| PhcycC3H3_A+H                 | 7.41209e-06 | 0.999984 | 7.41210e-06 | 0.999985 |
| rad37                         | 5.46662e-06 | 0.999990 | 5.46663e-06 | 0.999991 |
| PhcycC3H3_B+H                 | 3.06124e-06 | 0.999993 | 3.06124e-06 | 0.999994 |
| rad39                         | 2.23427e-06 | 0.999995 | 2.23428e-06 | 0.999996 |
| PAH10+CH3                     | 1.45372e-06 | 0.999996 | 1.45373e-06 | 0.999997 |
| Phenyl+cycC3H4                | 1.26413e-06 | 0.999998 | 0.000000    | 0.999997 |
| rad30                         | 1.14933e-06 | 0.999999 | 1.14933e-06 | 0.999998 |
| PAH9+H                        | 6.06281e-07 | 0.999999 | 6.06282e-07 | 0.999999 |
| rad38                         | 5.31254e-07 | 1.000000 | 5.31255e-07 | 1.000000 |
| PAH3+H                        | 2.06534e-07 | 1.000000 | 2.06535e-07 | 1.000000 |
| rad46                         | 5.03837e-08 | 1.000000 | 5.03838e-08 | 1.000000 |
| rad60syn                      | 4.30113e-08 | 1.000000 | 4.30113e-08 | 1.000000 |
| rad54                         | 3.72615e-08 | 1.000000 | 3.72615e-08 | 1.000000 |
| rad59                         | 2.58004e-08 | 1.000000 | 2.58004e-08 | 1.000000 |
| rad60anti                     | 2.50612e-08 | 1.000000 | 2.50612e-08 | 1.000000 |
| PAH1+H                        | 1.11102e-08 | 1.000000 | 1.11102e-08 | 1.000000 |
| rad50                         | 1.08530e-08 | 1.000000 | 1.08530e-08 | 1.000000 |
| rad43                         | 1.08255e-08 | 1.000000 | 1.08255e-08 | 1.000000 |
| rad70                         | 5.27763e-09 | 1.000000 | 5.27763e-09 | 1.000000 |
| rad55                         | 1.83174e-09 | 1.000000 | 1.83175e-09 | 1.000000 |
| rad62                         | 1.46956e-09 | 1.000000 | 1.46956e-09 | 1.000000 |
| rad51                         | 1.02140e-09 | 1.000000 | 1.02140e-09 | 1.000000 |
| rad34                         | 7.64053e-10 | 1.000000 | 7.64054e-10 | 1.000000 |
| rad58                         | 5.66064e-10 | 1.000000 | 5.66065e-10 | 1.000000 |
| rad52                         | 5.41768e-10 | 1.000000 | 5.41769e-10 | 1.000000 |
| rad61                         | 2.09071e-10 | 1.000000 | 2.09072e-10 | 1.000000 |
| rad41                         | 1.94594e-10 | 1.000000 | 1.94595e-10 | 1.000000 |
| rad53                         | 1.01501e-10 | 1.000000 | 1.01501e-10 | 1.000000 |
| rad56                         | 4.31932e-11 | 1.000000 | 4.31933e-11 | 1.000000 |
| rad64                         | 4.01362e-11 | 1.000000 | 4.01363e-11 | 1.000000 |
| rad42                         | 3.44813e-11 | 1.000000 | 3.44814e-11 | 1.000000 |
| rad65                         | 3.26029e-11 | 1.000000 | 3.26029e-11 | 1.000000 |
| PAH8+H                        | 8.11496e-12 | 1.000000 | 8.11497e-12 | 1.000000 |
| rad68syn                      | 7.66845e-12 | 1.000000 | 7.66846e-12 | 1.000000 |
| rad68anti                     | 5.13228e-12 | 1.000000 | 5.13229e-12 | 1.000000 |
| rad9                          | 3.32703e-12 | 1.000000 | 3.32703e-12 | 1.000000 |
| rad40syn                      | 2.48636e-12 | 1.000000 | 2.48636e-12 | 1.000000 |
| rad40anti                     | 1.83893e-12 | 1.000000 | 1.83893e-12 | 1.000000 |
| rad73                         | 1.11382e-12 | 1.000000 | 1.11382e-12 | 1.000000 |
| rad71                         | 6.08046e-13 | 1.000000 | 6.08047e-13 | 1.000000 |
| rad12                         | 6.62387e-15 | 1.000000 | 6.62388e-15 | 1.000000 |
| rad19anti                     | 6.02835e-15 | 1.000000 | 6.02835e-15 | 1.000000 |
| rad23                         | 5.04115e-15 | 1.000000 | 5.04116e-15 | 1.000000 |
| rad2                          | 2.51909e-15 | 1.000000 | 2.51909e-15 | 1.000000 |
| rad72                         | 2.02060e-15 | 1.000000 | 2.02061e-15 | 1.000000 |
| rad6                          | 1.99411e-15 | 1.000000 | 1.99411e-15 | 1.000000 |
| rad45                         | 1.35466e-15 | 1.000000 | 1.35466e-15 | 1.000000 |
| rad15                         | 8.90757e-16 | 1.000000 | 8.90757e-16 | 1.000000 |
| rad1                          | 7.61386e-16 | 1.000000 | 7.61388e-16 | 1.000000 |
| rad36                         | 1.67757e-16 | 1.000000 | 1.67758e-16 | 1.000000 |
| rad19syn                      | 1.44428e-16 | 1.000000 | 1.44428e-16 | 1.000000 |
| rad10                         | 6.03843e-17 | 1.000000 | 6.03844e-17 | 1.000000 |
| rad3                          | 3.28527e-17 | 1.000000 | 3.28527e-17 | 1.000000 |

|       |             |         |             |         |
|-------|-------------|---------|-------------|---------|
| rad4  | 2.71420e-17 | 1.00000 | 2.71421e-17 | 1.00000 |
| rad26 | 3.85429e-19 | 1.00000 | 3.85430e-19 | 1.00000 |
| rad7  | 3.13415e-19 | 1.00000 | 3.13415e-19 | 1.00000 |
| rad31 | 1.51028e-19 | 1.00000 | 1.51028e-19 | 1.00000 |
| rad28 | 1.10227e-19 | 1.00000 | 1.10227e-19 | 1.00000 |
| rad11 | 9.86344e-20 | 1.00000 | 9.86344e-20 | 1.00000 |
| rad24 | 4.04465e-20 | 1.00000 | 4.04465e-20 | 1.00000 |
| rad22 | 2.35236e-20 | 1.00000 | 2.35237e-20 | 1.00000 |
| rad21 | 1.34482e-20 | 1.00000 | 1.34482e-20 | 1.00000 |
| rad13 | 5.21077e-21 | 1.00000 | 5.21078e-21 | 1.00000 |
| rad33 | 2.38411e-21 | 1.00000 | 2.38411e-21 | 1.00000 |
| rad20 | 2.16491e-21 | 1.00000 | 2.16491e-21 | 1.00000 |
| rad47 | 8.53940e-23 | 1.00000 | 8.53940e-23 | 1.00000 |
| rad27 | 4.31826e-23 | 1.00000 | 4.31827e-23 | 1.00000 |
| rad25 | 3.68273e-23 | 1.00000 | 3.68274e-23 | 1.00000 |
| rad8  | 2.39851e-23 | 1.00000 | 2.39851e-23 | 1.00000 |
| rad14 | 4.94749e-24 | 1.00000 | 4.94749e-24 | 1.00000 |
| rad18 | 2.47625e-26 | 1.00000 | 2.47625e-26 | 1.00000 |
| rad5  | 3.07113e-30 | 1.00000 | 3.07114e-30 | 1.00000 |

0.100000000E-04 Pa, 900.000000 K

| Rate constant             | True (fraction)       | Effective (fraction)  |
|---------------------------|-----------------------|-----------------------|
| Total                     | 1.49199e-12 (1.00 )   | 1.49199e-12 (1.00 )   |
| Formation of rad19        | 1.30395e-12 (0.874 )  | 1.30394e-12 (0.874 )  |
| H-abstraction to cyc2enyl | 1.56554e-13 (0.105 )  | 1.56554e-13 (0.105 )  |
| H-abstraction to cyclenyl | 3.14892e-14 (0.0211 ) | 3.14890e-14 (0.0211 ) |

| species                       | PYtrue      | Cumul    | PYeffective | Cumul    |
|-------------------------------|-------------|----------|-------------|----------|
| Indene+H                      | 0.848699    | 0.848699 | 0.848703    | 0.848703 |
| Benzene+cycloprop-2-enylidene | 0.104929    | 0.953628 | 0.104930    | 0.953634 |
| PhCHCCH2+H                    | 0.0222941   | 0.975922 | 0.0222941   | 0.975928 |
| Benzene+cycloprop-1-enylidene | 0.0211054   | 0.997028 | 0.0211054   | 0.997033 |
| C2H2+PhCH2                    | 0.000683868 | 0.997712 | 0.000683871 | 0.997717 |
| Ph+MeAc                       | 0.000643403 | 0.998355 | 0.000643406 | 0.998360 |
| Ph+Allene                     | 0.000474185 | 0.998829 | 0.000474187 | 0.998835 |
| PhCCCH3+H                     | 0.000337156 | 0.999166 | 0.000337157 | 0.999172 |
| PhCCH+CH3                     | 0.000266833 | 0.999433 | 0.000266834 | 0.999439 |
| rad67                         | 0.000208252 | 0.999641 | 0.000208253 | 0.999647 |
| PhCH2CCH+H                    | 0.000196562 | 0.999838 | 0.000196563 | 0.999843 |
| rad35                         | 7.58728e-05 | 0.999914 | 7.58733e-05 | 0.999919 |
| PhcycC3H3_A+H                 | 2.42103e-05 | 0.999938 | 2.42105e-05 | 0.999943 |
| PAH7+H                        | 1.88375e-05 | 0.999957 | 1.88376e-05 | 0.999962 |
| PhcycC3H3_B+H                 | 1.21561e-05 | 0.999969 | 1.21561e-05 | 0.999974 |
| rad37                         | 1.14050e-05 | 0.999980 | 1.14050e-05 | 0.999986 |
| Phenyl+cycC3H4                | 5.07995e-06 | 0.999986 | 0.00000     | 0.999986 |
| PAH10+CH3                     | 4.40461e-06 | 0.999990 | 4.40463e-06 | 0.999990 |
| rad39                         | 3.79886e-06 | 0.999994 | 3.79888e-06 | 0.999994 |
| rad30                         | 2.25163e-06 | 0.999996 | 2.25165e-06 | 0.999996 |
| PAH9+H                        | 1.48864e-06 | 0.999997 | 1.48865e-06 | 0.999998 |
| rad38                         | 1.36505e-06 | 0.999999 | 1.36505e-06 | 0.999999 |
| PAH3+H                        | 6.06186e-07 | 0.999999 | 6.06189e-07 | 1.000000 |
| rad46                         | 1.39482e-07 | 1.000000 | 1.39483e-07 | 1.000000 |
| rad60syn                      | 1.03783e-07 | 1.000000 | 1.03784e-07 | 1.000000 |
| rad54                         | 1.00666e-07 | 1.000000 | 1.00667e-07 | 1.000000 |
| rad59                         | 7.22570e-08 | 1.000000 | 7.22573e-08 | 1.000000 |
| rad60anti                     | 6.13421e-08 | 1.000000 | 6.13425e-08 | 1.000000 |
| rad50                         | 4.00788e-08 | 1.000000 | 4.00791e-08 | 1.000000 |
| PAH1+H                        | 3.94732e-08 | 1.000000 | 3.94734e-08 | 1.000000 |
| rad43                         | 2.87031e-08 | 1.000000 | 2.87033e-08 | 1.000000 |
| rad70                         | 1.65408e-08 | 1.000000 | 1.65408e-08 | 1.000000 |
| rad55                         | 5.38699e-09 | 1.000000 | 5.38702e-09 | 1.000000 |
| rad51                         | 4.77134e-09 | 1.000000 | 4.77137e-09 | 1.000000 |
| rad62                         | 3.44637e-09 | 1.000000 | 3.44638e-09 | 1.000000 |
| rad34                         | 2.67892e-09 | 1.000000 | 2.67894e-09 | 1.000000 |
| rad52                         | 2.25237e-09 | 1.000000 | 2.25238e-09 | 1.000000 |
| rad58                         | 2.20457e-09 | 1.000000 | 2.20458e-09 | 1.000000 |
| rad61                         | 1.06256e-09 | 1.000000 | 1.06257e-09 | 1.000000 |
| rad41                         | 6.91191e-10 | 1.000000 | 6.91194e-10 | 1.000000 |
| rad53                         | 4.12665e-10 | 1.000000 | 4.12668e-10 | 1.000000 |
| rad56                         | 2.12371e-10 | 1.000000 | 2.12372e-10 | 1.000000 |
| rad64                         | 1.54860e-10 | 1.000000 | 1.54860e-10 | 1.000000 |
| rad65                         | 1.50319e-10 | 1.000000 | 1.50320e-10 | 1.000000 |
| rad42                         | 1.03376e-10 | 1.000000 | 1.03377e-10 | 1.000000 |
| PAH8+H                        | 5.91172e-11 | 1.000000 | 5.91175e-11 | 1.000000 |
| rad68syn                      | 4.07132e-11 | 1.000000 | 4.07134e-11 | 1.000000 |
| rad68anti                     | 2.70946e-11 | 1.000000 | 2.70947e-11 | 1.000000 |
| rad9                          | 2.62384e-11 | 1.000000 | 2.62384e-11 | 1.000000 |

|           |             |         |             |         |
|-----------|-------------|---------|-------------|---------|
| rad40syn  | 1.56733e-11 | 1.00000 | 1.56733e-11 | 1.00000 |
| rad40anti | 1.17159e-11 | 1.00000 | 1.17159e-11 | 1.00000 |
| rad73     | 1.01667e-11 | 1.00000 | 1.01667e-11 | 1.00000 |
| rad71     | 6.75151e-12 | 1.00000 | 6.75155e-12 | 1.00000 |
| rad12     | 4.04548e-14 | 1.00000 | 4.04550e-14 | 1.00000 |
| rad72     | 3.83083e-14 | 1.00000 | 3.83085e-14 | 1.00000 |
| rad23     | 5.64960e-15 | 1.00000 | 5.64962e-15 | 1.00000 |
| rad15     | 5.22185e-15 | 1.00000 | 5.22188e-15 | 1.00000 |
| rad19anti | 4.57501e-15 | 1.00000 | 4.57503e-15 | 1.00000 |
| rad2      | 2.44103e-15 | 1.00000 | 2.44104e-15 | 1.00000 |
| rad45     | 1.86816e-15 | 1.00000 | 1.86818e-15 | 1.00000 |
| rad6      | 1.47047e-15 | 1.00000 | 1.47048e-15 | 1.00000 |
| rad1      | 7.39446e-16 | 1.00000 | 7.39450e-16 | 1.00000 |
| rad36     | 2.09496e-16 | 1.00000 | 2.09496e-16 | 1.00000 |
| rad19syn  | 1.51735e-16 | 1.00000 | 1.51736e-16 | 1.00000 |
| rad10     | 5.67061e-17 | 1.00000 | 5.67064e-17 | 1.00000 |
| rad3      | 2.74609e-17 | 1.00000 | 2.74611e-17 | 1.00000 |
| rad4      | 2.27830e-17 | 1.00000 | 2.27832e-17 | 1.00000 |
| rad21     | 1.24313e-18 | 1.00000 | 1.24313e-18 | 1.00000 |
| rad24     | 8.13232e-19 | 1.00000 | 8.13237e-19 | 1.00000 |
| rad26     | 3.07780e-19 | 1.00000 | 3.07781e-19 | 1.00000 |
| rad7      | 3.04453e-19 | 1.00000 | 3.04454e-19 | 1.00000 |
| rad20     | 2.39355e-19 | 1.00000 | 2.39356e-19 | 1.00000 |
| rad31     | 1.88477e-19 | 1.00000 | 1.88478e-19 | 1.00000 |
| rad33     | 1.64405e-19 | 1.00000 | 1.64406e-19 | 1.00000 |
| rad11     | 1.03707e-19 | 1.00000 | 1.03708e-19 | 1.00000 |
| rad28     | 9.04720e-20 | 1.00000 | 9.04728e-20 | 1.00000 |
| rad8      | 5.47269e-20 | 1.00000 | 5.47271e-20 | 1.00000 |
| rad13     | 4.13390e-20 | 1.00000 | 4.13392e-20 | 1.00000 |
| rad22     | 2.96835e-20 | 1.00000 | 2.96837e-20 | 1.00000 |
| rad25     | 2.46150e-21 | 1.00000 | 2.46151e-21 | 1.00000 |
| rad27     | 2.21548e-21 | 1.00000 | 2.21549e-21 | 1.00000 |
| rad47     | 4.17543e-22 | 1.00000 | 4.17545e-22 | 1.00000 |
| rad14     | 1.66897e-22 | 1.00000 | 1.66898e-22 | 1.00000 |
| rad18     | 1.70799e-24 | 1.00000 | 1.70800e-24 | 1.00000 |
| rad5      | 2.42287e-29 | 1.00000 | 2.42288e-29 | 1.00000 |

0.100000000E-04 Pa, 1000.00000 K

=====

| Rate constant             | True (fraction)       | Effective (fraction)  |
|---------------------------|-----------------------|-----------------------|
| Total                     | 2.07591e-12 (1.00 )   | 2.07587e-12 (1.00 )   |
| Formation of rad19        | 1.74189e-12 (0.839 )  | 1.74186e-12 (0.839 )  |
| H-abstraction to cyc2enyl | 2.68753e-13 (0.129 )  | 2.68753e-13 (0.129 )  |
| H-abstraction to cyc1enyl | 6.52627e-14 (0.0314 ) | 6.52614e-14 (0.0314 ) |

| species                       | PYtrue      | Cumul    | PYeffective | Cumul    |
|-------------------------------|-------------|----------|-------------|----------|
| Indene+H                      | 0.799582    | 0.799582 | 0.799596    | 0.799596 |
| Benzene+cycloprop-2-enylidene | 0.129463    | 0.929045 | 0.129465    | 0.929061 |
| PhCHCCH2+H                    | 0.0345727   | 0.963618 | 0.0345733   | 0.963635 |
| Benzene+cycloprop-1-enylidene | 0.0314382   | 0.995056 | 0.0314381   | 0.995073 |
| C2H2+PhCH2                    | 0.00107013  | 0.996126 | 0.00107014  | 0.996143 |
| Ph+MeAc                       | 0.00105356  | 0.997180 | 0.00105357  | 0.997197 |
| Ph+Allene                     | 0.000856132 | 0.998036 | 0.000856147 | 0.998053 |
| PhCCCH3+H                     | 0.000518388 | 0.998554 | 0.000518396 | 0.998571 |
| PhCH2CCH+H                    | 0.000387329 | 0.998942 | 0.000387336 | 0.998958 |
| PhCCH+CH3                     | 0.000373412 | 0.999315 | 0.000373419 | 0.999332 |
| rad67                         | 0.000352154 | 0.999667 | 0.000352160 | 0.999684 |
| rad35                         | 0.000127506 | 0.999795 | 0.000127508 | 0.999812 |
| PhcycC3H3_A+H                 | 6.68787e-05 | 0.999862 | 6.68799e-05 | 0.999878 |
| PhcycC3H3_B+H                 | 3.94287e-05 | 0.999901 | 3.94293e-05 | 0.999918 |
| PAH7+H                        | 3.02070e-05 | 0.999931 | 3.02075e-05 | 0.999948 |
| rad37                         | 2.12565e-05 | 0.999953 | 2.12568e-05 | 0.999969 |
| Phenyl+cycC3H4                | 1.68078e-05 | 0.999969 | 0.00000     | 0.999969 |
| PAH10+CH3                     | 1.12446e-05 | 0.999981 | 1.12447e-05 | 0.999981 |
| rad39                         | 5.81024e-06 | 0.999986 | 5.81034e-06 | 0.999986 |
| rad30                         | 4.04406e-06 | 0.999990 | 4.04413e-06 | 0.999990 |
| PAH9+H                        | 3.29361e-06 | 0.999994 | 3.29367e-06 | 0.999994 |
| rad38                         | 3.08261e-06 | 0.999997 | 3.08266e-06 | 0.999997 |
| PAH3+H                        | 1.54070e-06 | 0.999998 | 1.54073e-06 | 0.999998 |
| rad46                         | 3.42239e-07 | 0.999999 | 3.42245e-07 | 0.999999 |
| rad54                         | 2.28520e-07 | 0.999999 | 2.28524e-07 | 0.999999 |
| rad60syn                      | 2.23169e-07 | 0.999999 | 2.23173e-07 | 0.999999 |
| rad59                         | 1.76070e-07 | 0.999999 | 1.76073e-07 | 0.999999 |
| rad60anti                     | 1.33518e-07 | 1.000000 | 1.33520e-07 | 0.999999 |
| rad50                         | 1.25826e-07 | 1.000000 | 1.25828e-07 | 1.000000 |
| PAH1+H                        | 1.15144e-07 | 1.000000 | 1.15145e-07 | 1.000000 |
| rad43                         | 6.59875e-08 | 1.000000 | 6.59887e-08 | 1.000000 |
| rad70                         | 4.32135e-08 | 1.000000 | 4.32143e-08 | 1.000000 |

|           |             |          |             |          |
|-----------|-------------|----------|-------------|----------|
| rad51     | 1.82048e-08 | 1.000000 | 1.82051e-08 | 1.000000 |
| rad55     | 1.31137e-08 | 1.000000 | 1.31139e-08 | 1.000000 |
| rad52     | 7.79284e-09 | 1.000000 | 7.79297e-09 | 1.000000 |
| rad34     | 7.69222e-09 | 1.000000 | 7.69236e-09 | 1.000000 |
| rad58     | 7.06658e-09 | 1.000000 | 7.06670e-09 | 1.000000 |
| rad62     | 7.03940e-09 | 1.000000 | 7.03953e-09 | 1.000000 |
| rad61     | 4.12272e-09 | 1.000000 | 4.12278e-09 | 1.000000 |
| rad41     | 2.02447e-09 | 1.000000 | 2.02451e-09 | 1.000000 |
| rad53     | 1.31432e-09 | 1.000000 | 1.31434e-09 | 1.000000 |
| rad56     | 7.88429e-10 | 1.000000 | 7.88442e-10 | 1.000000 |
| rad65     | 5.65099e-10 | 1.000000 | 5.65110e-10 | 1.000000 |
| rad64     | 4.71855e-10 | 1.000000 | 4.71863e-10 | 1.000000 |
| PAH8+H    | 3.09750e-10 | 1.000000 | 3.09755e-10 | 1.000000 |
| rad42     | 2.59222e-10 | 1.000000 | 2.59226e-10 | 1.000000 |
| rad68syn  | 1.64237e-10 | 1.000000 | 1.64240e-10 | 1.000000 |
| rad68anti | 1.08793e-10 | 1.000000 | 1.08795e-10 | 1.000000 |
| rad40syn  | 7.30616e-11 | 1.000000 | 7.30629e-11 | 1.000000 |
| rad73     | 6.65985e-11 | 1.000000 | 6.65997e-11 | 1.000000 |
| rad40anti | 5.52184e-11 | 1.000000 | 5.52194e-11 | 1.000000 |
| rad71     | 5.18858e-11 | 1.000000 | 5.18867e-11 | 1.000000 |
| rad9      | 4.55533e-11 | 1.000000 | 4.55541e-11 | 1.000000 |
| rad72     | 4.47191e-13 | 1.000000 | 4.47198e-13 | 1.000000 |
| rad12     | 7.27751e-14 | 1.000000 | 7.27764e-14 | 1.000000 |
| rad15     | 8.21864e-15 | 1.000000 | 8.21879e-15 | 1.000000 |
| rad23     | 5.64060e-15 | 1.000000 | 5.64069e-15 | 1.000000 |
| rad19anti | 3.42048e-15 | 1.000000 | 3.42054e-15 | 1.000000 |
| rad45     | 2.12779e-15 | 1.000000 | 2.12783e-15 | 1.000000 |
| rad2      | 2.03686e-15 | 1.000000 | 2.03690e-15 | 1.000000 |
| rad6      | 9.67691e-16 | 1.000000 | 9.67705e-16 | 1.000000 |
| rad1      | 6.09739e-16 | 1.000000 | 6.09750e-16 | 1.000000 |
| rad36     | 2.26542e-16 | 1.000000 | 2.26546e-16 | 1.000000 |
| rad19syn  | 1.42443e-16 | 1.000000 | 1.42446e-16 | 1.000000 |
| rad10     | 4.75081e-17 | 1.000000 | 4.75089e-17 | 1.000000 |
| rad21     | 2.11576e-17 | 1.000000 | 2.11580e-17 | 1.000000 |
| rad3      | 2.07742e-17 | 1.000000 | 2.07746e-17 | 1.000000 |
| rad4      | 1.71774e-17 | 1.000000 | 1.71776e-17 | 1.000000 |
| rad8      | 6.27706e-18 | 1.000000 | 6.27717e-18 | 1.000000 |
| rad20     | 4.93246e-18 | 1.000000 | 4.93255e-18 | 1.000000 |
| rad24     | 3.61522e-18 | 1.000000 | 3.61528e-18 | 1.000000 |
| rad33     | 2.31463e-18 | 1.000000 | 2.31466e-18 | 1.000000 |
| rad13     | 2.20976e-18 | 1.000000 | 2.20979e-18 | 1.000000 |
| rad7      | 2.79635e-19 | 1.000000 | 2.79640e-19 | 1.000000 |
| rad26     | 2.21114e-19 | 1.000000 | 2.21118e-19 | 1.000000 |
| rad31     | 2.18570e-19 | 1.000000 | 2.18575e-19 | 1.000000 |
| rad11     | 1.99707e-19 | 1.000000 | 1.99711e-19 | 1.000000 |
| rad25     | 7.69191e-20 | 1.000000 | 7.69204e-20 | 1.000000 |
| rad28     | 6.68955e-20 | 1.000000 | 6.68966e-20 | 1.000000 |
| rad27     | 5.63097e-20 | 1.000000 | 5.63107e-20 | 1.000000 |
| rad22     | 3.45350e-20 | 1.000000 | 3.45357e-20 | 1.000000 |
| rad14     | 4.01811e-21 | 1.000000 | 4.01818e-21 | 1.000000 |
| rad47     | 1.62908e-21 | 1.000000 | 1.62911e-21 | 1.000000 |
| rad18     | 4.30618e-22 | 1.000000 | 4.30625e-22 | 1.000000 |
| rad5      | 3.79094e-28 | 1.000000 | 3.79100e-28 | 1.000000 |

0.100000000E-04 Pa, 1100.00000 K

| Rate constant             | True (fraction)       | Effective (fraction)  |
|---------------------------|-----------------------|-----------------------|
| Total                     | 2.81236e-12 (1.00 )   | 2.81222e-12 (1.00 )   |
| Formation of rad19        | 2.25993e-12 (0.804 )  | 2.25980e-12 (0.804 )  |
| H-abstraction to cyc2enyl | 4.30538e-13 (0.153 )  | 4.30538e-13 (0.153 )  |
| H-abstraction to cyclenyl | 1.21896e-13 (0.0433 ) | 1.21889e-13 (0.0433 ) |

| species                       | PYtrue      | Cumul    | PYeffective | Cumul    |
|-------------------------------|-------------|----------|-------------|----------|
| Indene+H                      | 0.745455    | 0.745455 | 0.745493    | 0.745493 |
| Benzene+cycloprop-2-enylidene | 0.153088    | 0.898543 | 0.153095    | 0.898588 |
| PhCHCCH2+H                    | 0.0504085   | 0.948951 | 0.0504110   | 0.948999 |
| Benzene+cycloprop-1-enylidene | 0.0433429   | 0.992294 | 0.0433425   | 0.992342 |
| Ph+MeAc                       | 0.00159989  | 0.993894 | 0.00159997  | 0.993942 |
| C2H2+PhCH2                    | 0.00157393  | 0.995468 | 0.00157401  | 0.995516 |
| Ph+Allene                     | 0.00139377  | 0.996862 | 0.00139384  | 0.996909 |
| PhCCCH3+H                     | 0.000746146 | 0.997608 | 0.000746184 | 0.997656 |
| PhCH2CCH+H                    | 0.000685299 | 0.998293 | 0.000685333 | 0.998341 |
| rad67                         | 0.000551509 | 0.998845 | 0.000551537 | 0.998892 |
| PhCCH+CH3                     | 0.000499927 | 0.999345 | 0.000499952 | 0.999392 |
| rad35                         | 0.000198904 | 0.999544 | 0.000198914 | 0.999591 |
| PhcycC3H3_A+H                 | 0.000160985 | 0.999705 | 0.000160994 | 0.999752 |
| PhcycC3H3_B+H                 | 0.000108569 | 0.999813 | 0.000108575 | 0.999861 |
| Phenyl+cycC3H4                | 4.74535e-05 | 0.999861 | 0.000000    | 0.999861 |

|           |             |          |             |          |
|-----------|-------------|----------|-------------|----------|
| PAH7+H    | 4.44306e-05 | 0.999905 | 4.44328e-05 | 0.999905 |
| rad37     | 3.57976e-05 | 0.999941 | 3.57993e-05 | 0.999941 |
| PAH10+CH3 | 2.47740e-05 | 0.999966 | 2.47753e-05 | 0.999966 |
| rad39     | 8.15502e-06 | 0.999974 | 8.15543e-06 | 0.999974 |
| rad30     | 6.70503e-06 | 0.999981 | 6.70536e-06 | 0.999981 |
| PAH9+H    | 6.62670e-06 | 0.999987 | 6.62703e-06 | 0.999987 |
| rad38     | 6.20642e-06 | 0.999993 | 6.20672e-06 | 0.999994 |
| PAH3+H    | 3.44988e-06 | 0.999997 | 3.45006e-06 | 0.999997 |
| rad46     | 7.53032e-07 | 0.999998 | 7.53070e-07 | 0.999998 |
| rad54     | 4.48842e-07 | 0.999998 | 4.48864e-07 | 0.999998 |
| rad60syn  | 4.32688e-07 | 0.999998 | 4.32709e-07 | 0.999999 |
| rad59     | 3.79560e-07 | 0.999999 | 3.79579e-07 | 0.999999 |
| rad50     | 3.42341e-07 | 0.999999 | 3.42358e-07 | 0.999999 |
| PAH1+H    | 2.85109e-07 | 0.999999 | 2.85123e-07 | 1.000000 |
| rad60anti | 2.61576e-07 | 1.000000 | 2.61589e-07 | 1.000000 |
| rad43     | 1.34197e-07 | 1.000000 | 1.34204e-07 | 1.000000 |
| rad70     | 9.71315e-08 | 1.000000 | 9.71362e-08 | 1.000000 |
| rad51     | 5.83466e-08 | 1.000000 | 5.83495e-08 | 1.000000 |
| rad55     | 2.73128e-08 | 1.000000 | 2.73142e-08 | 1.000000 |
| rad52     | 2.29834e-08 | 1.000000 | 2.29845e-08 | 1.000000 |
| rad58     | 1.92024e-08 | 1.000000 | 1.92034e-08 | 1.000000 |
| rad34     | 1.87451e-08 | 1.000000 | 1.87461e-08 | 1.000000 |
| rad61     | 1.28390e-08 | 1.000000 | 1.28397e-08 | 1.000000 |
| rad62     | 1.28154e-08 | 1.000000 | 1.28161e-08 | 1.000000 |
| rad41     | 5.04814e-09 | 1.000000 | 5.04840e-09 | 1.000000 |
| rad53     | 3.43664e-09 | 1.000000 | 3.43682e-09 | 1.000000 |
| rad56     | 2.33966e-09 | 1.000000 | 2.33978e-09 | 1.000000 |
| rad65     | 1.78385e-09 | 1.000000 | 1.78394e-09 | 1.000000 |
| PAH8+H    | 1.24981e-09 | 1.000000 | 1.24987e-09 | 1.000000 |
| rad64     | 1.19311e-09 | 1.000000 | 1.19317e-09 | 1.000000 |
| rad42     | 5.61778e-10 | 1.000000 | 5.61806e-10 | 1.000000 |
| rad68syn  | 5.31777e-10 | 1.000000 | 5.31804e-10 | 1.000000 |
| rad68anti | 3.50889e-10 | 1.000000 | 3.50907e-10 | 1.000000 |
| rad73     | 3.32911e-10 | 1.000000 | 3.32927e-10 | 1.000000 |
| rad71     | 2.96146e-10 | 1.000000 | 2.96160e-10 | 1.000000 |
| rad40syn  | 2.67659e-10 | 1.000000 | 2.67673e-10 | 1.000000 |
| rad40anti | 2.04456e-10 | 1.000000 | 2.04466e-10 | 1.000000 |
| rad9      | 4.10477e-11 | 1.000000 | 4.10497e-11 | 1.000000 |
| rad72     | 3.56688e-12 | 1.000000 | 3.56706e-12 | 1.000000 |
| rad12     | 7.93739e-14 | 1.000000 | 7.93779e-14 | 1.000000 |
| rad15     | 7.34609e-15 | 1.000000 | 7.34645e-15 | 1.000000 |
| rad23     | 5.34708e-15 | 1.000000 | 5.34735e-15 | 1.000000 |
| rad19anti | 2.56276e-15 | 1.000000 | 2.56289e-15 | 1.000000 |
| rad45     | 2.19511e-15 | 1.000000 | 2.19522e-15 | 1.000000 |
| rad2      | 1.60725e-15 | 1.000000 | 1.60733e-15 | 1.000000 |
| rad6      | 6.87051e-16 | 1.000000 | 6.87086e-16 | 1.000000 |
| rad1      | 4.73826e-16 | 1.000000 | 4.73849e-16 | 1.000000 |
| rad36     | 2.28861e-16 | 1.000000 | 2.28872e-16 | 1.000000 |
| rad19syn  | 1.28391e-16 | 1.000000 | 1.28398e-16 | 1.000000 |
| rad21     | 9.63737e-17 | 1.000000 | 9.63784e-17 | 1.000000 |
| rad8      | 7.65078e-17 | 1.000000 | 7.65117e-17 | 1.000000 |
| rad10     | 3.88849e-17 | 1.000000 | 3.88868e-17 | 1.000000 |
| rad13     | 3.15591e-17 | 1.000000 | 3.15606e-17 | 1.000000 |
| rad20     | 2.48655e-17 | 1.000000 | 2.48667e-17 | 1.000000 |
| rad3      | 1.50748e-17 | 1.000000 | 1.50755e-17 | 1.000000 |
| rad4      | 1.23983e-17 | 1.000000 | 1.23989e-17 | 1.000000 |
| rad33     | 8.69060e-18 | 1.000000 | 8.69109e-18 | 1.000000 |
| rad24     | 7.72326e-18 | 1.000000 | 7.72364e-18 | 1.000000 |
| rad11     | 5.60981e-18 | 1.000000 | 5.61009e-18 | 1.000000 |
| rad25     | 7.88055e-19 | 1.000000 | 7.88094e-19 | 1.000000 |
| rad27     | 4.73304e-19 | 1.000000 | 4.73328e-19 | 1.000000 |
| rad7      | 4.44634e-19 | 1.000000 | 4.44657e-19 | 1.000000 |
| rad31     | 2.41068e-19 | 1.000000 | 2.41079e-19 | 1.000000 |
| rad26     | 1.62716e-19 | 1.000000 | 1.62725e-19 | 1.000000 |
| rad28     | 5.08636e-20 | 1.000000 | 5.08661e-20 | 1.000000 |
| rad18     | 4.94647e-20 | 1.000000 | 4.94672e-20 | 1.000000 |
| rad22     | 3.85925e-20 | 1.000000 | 3.85945e-20 | 1.000000 |
| rad14     | 3.73381e-20 | 1.000000 | 3.73399e-20 | 1.000000 |
| rad47     | 5.24230e-21 | 1.000000 | 5.24256e-21 | 1.000000 |
| rad5      | 1.11265e-26 | 1.000000 | 1.11270e-26 | 1.000000 |

0.100000000E-04 Pa, 1200.00000 K

| Rate constant             | True (fraction)       | Effective (fraction)  |
|---------------------------|-----------------------|-----------------------|
| Total                     | 3.72623e-12 (1.00 )   | 3.72576e-12 (1.00 )   |
| Formation of rad19        | 2.86288e-12 (0.768 )  | 2.86245e-12 (0.768 )  |
| H-abstraction to cyc2enyl | 6.53266e-13 (0.175 )  | 6.53266e-13 (0.175 )  |
| H-abstraction to cyclenyl | 2.10085e-13 (0.0564 ) | 2.10053e-13 (0.0564 ) |

| species                       | PYtrue      | Cumul    | PYeffective | Cumul    |
|-------------------------------|-------------|----------|-------------|----------|
| Indene+H                      | 0.687506    | 0.687506 | 0.687593    | 0.687593 |
| Benzene+cycloprop-2-enylidene | 0.175315    | 0.862821 | 0.175337    | 0.862930 |
| PhCHCCH2+H                    | 0.0694470   | 0.932268 | 0.0694557   | 0.932386 |
| Benzene+cycloprop-1-enylidene | 0.0563801   | 0.988648 | 0.0563786   | 0.988764 |
| Ph+MeAc                       | 0.00227272  | 0.990921 | 0.00227301  | 0.991037 |
| C2H2+PhCH2                    | 0.00219121  | 0.993112 | 0.00219148  | 0.993229 |
| Ph+Allene                     | 0.00207994  | 0.995192 | 0.00208020  | 0.995309 |
| PhCH2CCH+H                    | 0.00110691  | 0.996299 | 0.00110706  | 0.996416 |
| PhCCCH3+H                     | 0.00101200  | 0.997311 | 0.00101213  | 0.997428 |
| rad67                         | 0.000806305 | 0.998117 | 0.000806406 | 0.998235 |
| PhCCH+CH3                     | 0.000645716 | 0.998763 | 0.000645798 | 0.998880 |
| PhcycC3H3_A+H                 | 0.000345598 | 0.999109 | 0.000345641 | 0.999226 |
| rad35                         | 0.000290169 | 0.999399 | 0.000290206 | 0.999516 |
| PhcycC3H3_B+H                 | 0.000261273 | 0.999660 | 0.000261306 | 0.999778 |
| Phenyl+cycC3H4                | 0.000117514 | 0.999778 | 0.000000    | 0.999778 |
| PAH7+H                        | 6.09151e-05 | 0.999838 | 6.09229e-05 | 0.999839 |
| rad37                         | 5.50993e-05 | 0.999894 | 5.51063e-05 | 0.999894 |
| PAH10+CH3                     | 4.81021e-05 | 0.999942 | 4.81082e-05 | 0.999942 |
| PAH9+H                        | 1.22285e-05 | 0.999954 | 1.22300e-05 | 0.999954 |
| rad38                         | 1.12958e-05 | 0.999965 | 1.12972e-05 | 0.999965 |
| rad39                         | 1.06983e-05 | 0.999976 | 1.06996e-05 | 0.999976 |
| rad30                         | 1.03391e-05 | 0.999986 | 1.03403e-05 | 0.999986 |
| PAH3+H                        | 6.91379e-06 | 0.999993 | 6.91466e-06 | 0.999993 |
| rad46                         | 1.50176e-06 | 0.999995 | 1.50195e-06 | 0.999995 |
| rad50                         | 8.20642e-07 | 0.999995 | 8.20743e-07 | 0.999996 |
| rad54                         | 7.81497e-07 | 0.999996 | 7.81598e-07 | 0.999996 |
| rad60syn                      | 7.65102e-07 | 0.999997 | 7.65199e-07 | 0.999997 |
| rad59                         | 7.35018e-07 | 0.999998 | 7.35111e-07 | 0.999998 |
| PAH1+H                        | 6.15259e-07 | 0.999998 | 6.15337e-07 | 0.999998 |
| rad60anti                     | 4.66711e-07 | 0.999999 | 4.66769e-07 | 0.999999 |
| rad43                         | 2.45550e-07 | 0.999999 | 2.45581e-07 | 0.999999 |
| rad70                         | 1.92605e-07 | 0.999999 | 1.92629e-07 | 0.999999 |
| rad51                         | 1.60721e-07 | 0.999999 | 1.60741e-07 | 1.000000 |
| rad52                         | 5.89508e-08 | 1.000000 | 5.89583e-08 | 1.000000 |
| rad55                         | 4.99974e-08 | 1.000000 | 5.00038e-08 | 1.000000 |
| rad58                         | 4.53331e-08 | 1.000000 | 4.53389e-08 | 1.000000 |
| rad34                         | 3.98655e-08 | 1.000000 | 3.98705e-08 | 1.000000 |
| rad61                         | 3.33579e-08 | 1.000000 | 3.33621e-08 | 1.000000 |
| rad62                         | 2.11968e-08 | 1.000000 | 2.11994e-08 | 1.000000 |
| rad41                         | 1.09917e-08 | 1.000000 | 1.09931e-08 | 1.000000 |
| rad53                         | 7.65059e-09 | 1.000000 | 7.65156e-09 | 1.000000 |
| rad56                         | 5.79402e-09 | 1.000000 | 5.79474e-09 | 1.000000 |
| rad65                         | 4.84114e-09 | 1.000000 | 4.84175e-09 | 1.000000 |
| PAH8+H                        | 4.08163e-09 | 1.000000 | 4.08215e-09 | 1.000000 |
| rad64                         | 2.59994e-09 | 1.000000 | 2.60027e-09 | 1.000000 |
| rad68syn                      | 1.43965e-09 | 1.000000 | 1.43983e-09 | 1.000000 |
| rad73                         | 1.32831e-09 | 1.000000 | 1.32848e-09 | 1.000000 |
| rad71                         | 1.32075e-09 | 1.000000 | 1.32091e-09 | 1.000000 |
| rad42                         | 1.07985e-09 | 1.000000 | 1.07999e-09 | 1.000000 |
| rad68anti                     | 9.46805e-10 | 1.000000 | 9.46926e-10 | 1.000000 |
| rad40syn                      | 8.05959e-10 | 1.000000 | 8.06061e-10 | 1.000000 |
| rad40anti                     | 6.21769e-10 | 1.000000 | 6.21848e-10 | 1.000000 |
| rad9                          | 2.96858e-11 | 1.000000 | 2.96895e-11 | 1.000000 |
| rad72                         | 2.08613e-11 | 1.000000 | 2.08640e-11 | 1.000000 |
| rad12                         | 7.13600e-14 | 1.000000 | 7.13690e-14 | 1.000000 |
| rad15                         | 5.82437e-15 | 1.000000 | 5.82511e-15 | 1.000000 |
| rad23                         | 4.93439e-15 | 1.000000 | 4.93502e-15 | 1.000000 |
| rad45                         | 2.14542e-15 | 1.000000 | 2.14569e-15 | 1.000000 |
| rad19anti                     | 1.93811e-15 | 1.000000 | 1.93836e-15 | 1.000000 |
| rad2                          | 1.22415e-15 | 1.000000 | 1.22430e-15 | 1.000000 |
| rad6                          | 6.01428e-16 | 1.000000 | 6.01504e-16 | 1.000000 |
| rad1                          | 3.58904e-16 | 1.000000 | 3.58949e-16 | 1.000000 |
| rad8                          | 2.53541e-16 | 1.000000 | 2.53574e-16 | 1.000000 |
| rad36                         | 2.22601e-16 | 1.000000 | 2.22629e-16 | 1.000000 |
| rad21                         | 2.06285e-16 | 1.000000 | 2.06311e-16 | 1.000000 |
| rad13                         | 1.26209e-16 | 1.000000 | 1.26225e-16 | 1.000000 |
| rad19syn                      | 1.13955e-16 | 1.000000 | 1.13970e-16 | 1.000000 |
| rad11                         | 9.73404e-17 | 1.000000 | 9.73524e-17 | 1.000000 |
| rad20                         | 5.30461e-17 | 1.000000 | 5.30528e-17 | 1.000000 |
| rad10                         | 3.45433e-17 | 1.000000 | 3.45477e-17 | 1.000000 |
| rad33                         | 1.49700e-17 | 1.000000 | 1.49719e-17 | 1.000000 |
| rad24                         | 1.18501e-17 | 1.000000 | 1.18516e-17 | 1.000000 |
| rad3                          | 1.07116e-17 | 1.000000 | 1.07129e-17 | 1.000000 |
| rad4                          | 8.76697e-18 | 1.000000 | 8.76812e-18 | 1.000000 |
| rad7                          | 7.06074e-18 | 1.000000 | 7.06162e-18 | 1.000000 |
| rad25                         | 2.92600e-18 | 1.000000 | 2.92637e-18 | 1.000000 |
| rad18                         | 1.64157e-18 | 1.000000 | 1.64178e-18 | 1.000000 |
| rad27                         | 1.52386e-18 | 1.000000 | 1.52405e-18 | 1.000000 |



|       |             |          |             |          |
|-------|-------------|----------|-------------|----------|
| rad31 | 2.55729e-19 | 1.000000 | 2.55762e-19 | 1.000000 |
| rad14 | 1.32731e-19 | 1.000000 | 1.32748e-19 | 1.000000 |
| rad26 | 1.27811e-19 | 1.000000 | 1.27826e-19 | 1.000000 |
| rad22 | 4.13203e-20 | 1.000000 | 4.13255e-20 | 1.000000 |
| rad28 | 4.12939e-20 | 1.000000 | 4.12991e-20 | 1.000000 |
| rad47 | 1.43379e-20 | 1.000000 | 1.43397e-20 | 1.000000 |
| rad5  | 5.08763e-25 | 1.000000 | 5.08827e-25 | 1.000000 |

0.100000000E-04 Pa, 1300.00000 K

| Rate constant             | True (fraction)       | Effective (fraction)  |
|---------------------------|-----------------------|-----------------------|
| Total                     | 4.84401e-12 (1.00 )   | 4.84262e-12 (1.00 )   |
| Formation of rad19        | 3.55537e-12 (0.734 )  | 3.55411e-12 (0.734 )  |
| H-abstraction to cyc2enyl | 9.48893e-13 (0.196 )  | 9.48893e-13 (0.196 )  |
| H-abstraction to cyclenyl | 3.39740e-13 (0.0701 ) | 3.39620e-13 (0.0701 ) |

| species                       | PYtrue      | Cumul    | PYeffective | Cumul    |
|-------------------------------|-------------|----------|-------------|----------|
| Indene+H                      | 0.627161    | 0.627161 | 0.627340    | 0.627340 |
| Benzene+cycloprop-2-enylidene | 0.195890    | 0.823052 | 0.195946    | 0.823286 |
| PhCHCCH2+H                    | 0.0908777   | 0.913929 | 0.0909037   | 0.914190 |
| Benzene+cycloprop-1-enylidene | 0.0701362   | 0.984065 | 0.0701313   | 0.984321 |
| Ph+MeAc                       | 0.00304441  | 0.987110 | 0.00304527  | 0.987366 |
| C2H2+PhCH2                    | 0.00290372  | 0.990014 | 0.00290454  | 0.990271 |
| Ph+Allene                     | 0.00288470  | 0.992898 | 0.00288553  | 0.993157 |
| PhCH2CCH+H                    | 0.00165448  | 0.994553 | 0.00165495  | 0.994812 |
| PhCCCH3+H                     | 0.00130153  | 0.995854 | 0.00130190  | 0.996113 |
| rad67                         | 0.00110883  | 0.996963 | 0.00110915  | 0.997223 |
| PhCCH+CH3                     | 0.000809514 | 0.997773 | 0.000809751 | 0.998032 |
| PhcycC3H3_A+H                 | 0.000673391 | 0.998446 | 0.000673584 | 0.998706 |
| PhcycC3H3_B+H                 | 0.000561394 | 0.999007 | 0.000561554 | 0.999267 |
| rad35                         | 0.000398725 | 0.999406 | 0.000398838 | 0.999666 |
| Phenyl+cycC3H4                | 0.000260506 | 0.999667 | 0.000000    | 0.999666 |
| PAH10+CH3                     | 8.38007e-05 | 0.999750 | 8.38250e-05 | 0.999750 |
| PAH7+H                        | 7.89117e-05 | 0.999829 | 7.89341e-05 | 0.999829 |
| rad37                         | 7.83568e-05 | 0.999908 | 7.83785e-05 | 0.999907 |
| PAH9+H                        | 2.08511e-05 | 0.999929 | 2.08571e-05 | 0.999928 |
| rad38                         | 1.88167e-05 | 0.999947 | 1.88221e-05 | 0.999947 |
| rad30                         | 1.49360e-05 | 0.999962 | 1.49402e-05 | 0.999962 |
| rad39                         | 1.33374e-05 | 0.999976 | 1.33412e-05 | 0.999975 |
| PAH3+H                        | 1.25732e-05 | 0.999988 | 1.25768e-05 | 0.999988 |
| rad46                         | 2.73965e-06 | 0.999991 | 2.74043e-06 | 0.999991 |
| rad50                         | 1.75696e-06 | 0.999993 | 1.75746e-06 | 0.999992 |
| rad59                         | 1.29584e-06 | 0.999994 | 1.29620e-06 | 0.999994 |
| rad60syn                      | 1.24692e-06 | 0.999995 | 1.24728e-06 | 0.999995 |
| rad54                         | 1.23055e-06 | 0.999996 | 1.23091e-06 | 0.999996 |
| PAH1+H                        | 1.18164e-06 | 0.999998 | 1.18197e-06 | 0.999997 |
| rad60anti                     | 7.66599e-07 | 0.999998 | 7.66824e-07 | 0.999998 |
| rad43                         | 4.10006e-07 | 0.999999 | 4.10123e-07 | 0.999999 |
| rad51                         | 3.87406e-07 | 0.999999 | 3.87517e-07 | 0.999999 |
| rad70                         | 3.43677e-07 | 1.000000 | 3.43775e-07 | 0.999999 |
| rad52                         | 1.33628e-07 | 1.000000 | 1.33666e-07 | 0.999999 |
| rad58                         | 9.48433e-08 | 1.000000 | 9.48705e-08 | 1.000000 |
| rad55                         | 8.22139e-08 | 1.000000 | 8.22375e-08 | 1.000000 |
| rad34                         | 7.56235e-08 | 1.000000 | 7.56447e-08 | 1.000000 |
| rad61                         | 7.45086e-08 | 1.000000 | 7.45298e-08 | 1.000000 |
| rad62                         | 3.23565e-08 | 1.000000 | 3.23657e-08 | 1.000000 |
| rad41                         | 2.13212e-08 | 1.000000 | 2.13273e-08 | 1.000000 |
| rad53                         | 1.49188e-08 | 1.000000 | 1.49231e-08 | 1.000000 |
| rad56                         | 1.23746e-08 | 1.000000 | 1.23782e-08 | 1.000000 |
| rad65                         | 1.15036e-08 | 1.000000 | 1.15069e-08 | 1.000000 |
| PAH8+H                        | 1.11832e-08 | 1.000000 | 1.11864e-08 | 1.000000 |
| rad64                         | 5.02551e-09 | 1.000000 | 5.02694e-09 | 1.000000 |
| rad71                         | 4.76253e-09 | 1.000000 | 4.76389e-09 | 1.000000 |
| rad73                         | 4.36513e-09 | 1.000000 | 4.36638e-09 | 1.000000 |
| rad68syn                      | 3.35945e-09 | 1.000000 | 3.36041e-09 | 1.000000 |
| rad68anti                     | 2.20311e-09 | 1.000000 | 2.20373e-09 | 1.000000 |
| rad40syn                      | 2.06131e-09 | 1.000000 | 2.06190e-09 | 1.000000 |
| rad42                         | 1.87919e-09 | 1.000000 | 1.87972e-09 | 1.000000 |
| rad40anti                     | 1.60444e-09 | 1.000000 | 1.60490e-09 | 1.000000 |
| rad72                         | 9.34613e-11 | 1.000000 | 9.34878e-11 | 1.000000 |
| rad9                          | 1.96469e-11 | 1.000000 | 1.96525e-11 | 1.000000 |
| rad12                         | 5.89852e-14 | 1.000000 | 5.90021e-14 | 1.000000 |
| rad15                         | 1.07568e-14 | 1.000000 | 1.07598e-14 | 1.000000 |
| rad23                         | 4.49139e-15 | 1.000000 | 4.49267e-15 | 1.000000 |
| rad45                         | 2.02987e-15 | 1.000000 | 2.03045e-15 | 1.000000 |
| rad19anti                     | 1.48394e-15 | 1.000000 | 1.48436e-15 | 1.000000 |
| rad2                          | 9.13907e-16 | 1.000000 | 9.14167e-16 | 1.000000 |
| rad6                          | 6.97720e-16 | 1.000000 | 6.97920e-16 | 1.000000 |

|          |             |         |             |          |
|----------|-------------|---------|-------------|----------|
| rad11    | 5.70104e-16 | 1.00000 | 5.70267e-16 | 1.000000 |
| rad8     | 4.42248e-16 | 1.00000 | 4.42375e-16 | 1.000000 |
| rad21    | 3.03536e-16 | 1.00000 | 3.03622e-16 | 1.000000 |
| rad1     | 2.69034e-16 | 1.00000 | 2.69110e-16 | 1.000000 |
| rad13    | 2.24561e-16 | 1.00000 | 2.24625e-16 | 1.000000 |
| rad36    | 2.11145e-16 | 1.00000 | 2.11205e-16 | 1.000000 |
| rad19syn | 1.00706e-16 | 1.00000 | 1.00735e-16 | 1.000000 |
| rad7     | 8.20964e-17 | 1.00000 | 8.21201e-17 | 1.000000 |
| rad10    | 7.42414e-17 | 1.00000 | 7.42627e-17 | 1.000000 |
| rad20    | 7.38165e-17 | 1.00000 | 7.38377e-17 | 1.000000 |
| rad33    | 1.76734e-17 | 1.00000 | 1.76784e-17 | 1.000000 |
| rad18    | 1.53529e-17 | 1.00000 | 1.53573e-17 | 1.000000 |
| rad24    | 1.53474e-17 | 1.00000 | 1.53518e-17 | 1.000000 |
| rad3     | 7.54540e-18 | 1.00000 | 7.54759e-18 | 1.000000 |
| rad4     | 6.14445e-18 | 1.00000 | 6.14621e-18 | 1.000000 |
| rad25    | 5.66799e-18 | 1.00000 | 5.66960e-18 | 1.000000 |
| rad27    | 2.70871e-18 | 1.00000 | 2.70948e-18 | 1.000000 |
| rad31    | 2.62744e-19 | 1.00000 | 2.62819e-19 | 1.000000 |
| rad14    | 2.40834e-19 | 1.00000 | 2.40903e-19 | 1.000000 |
| rad26    | 2.19748e-19 | 1.00000 | 2.19811e-19 | 1.000000 |
| rad22    | 4.21218e-20 | 1.00000 | 4.21338e-20 | 1.000000 |
| rad28    | 3.97701e-20 | 1.00000 | 3.97815e-20 | 1.000000 |
| rad47    | 3.40948e-20 | 1.00000 | 3.41046e-20 | 1.000000 |
| rad5     | 2.68038e-23 | 1.00000 | 2.68115e-23 | 1.000000 |

0.100000000E-04 Pa, 1400.00000 K

| Rate constant             | True (fraction)       | Effective (fraction)  |
|---------------------------|-----------------------|-----------------------|
| Total                     | 6.19360e-12 (1.00 )   | 6.18997e-12 (1.00 )   |
| Formation of rad19        | 4.34185e-12 (0.701 )  | 4.33861e-12 (0.701 )  |
| H-abstraction to cyc2enyl | 1.32990e-12 (0.215 )  | 1.32990e-12 (0.215 )  |
| H-abstraction to cyclenyl | 5.21850e-13 (0.0843 ) | 5.21461e-13 (0.0842 ) |

| species                       | PYtrue      | Cumul    | PYeffective | Cumul    |
|-------------------------------|-------------|----------|-------------|----------|
| Indene+H                      | 0.566028    | 0.566028 | 0.566360    | 0.566360 |
| Benzene+cycloprop-2-enylidene | 0.214721    | 0.780749 | 0.214847    | 0.781207 |
| PhCHCCH2+H                    | 0.113526    | 0.894275 | 0.113593    | 0.894800 |
| Benzene+cycloprop-1-enylidene | 0.0842564   | 0.978532 | 0.0842429   | 0.979043 |
| Ph+MeAc                       | 0.00387284  | 0.982405 | 0.00387511  | 0.982918 |
| Ph+Allene                     | 0.00376036  | 0.986165 | 0.00376256  | 0.986680 |
| C2H2+PhCH2                    | 0.00367929  | 0.989844 | 0.00368145  | 0.990362 |
| PhCH2CCH+H                    | 0.00231297  | 0.992157 | 0.00231433  | 0.992676 |
| PhCCCH3+H                     | 0.00159640  | 0.993754 | 0.00159734  | 0.994274 |
| rad67                         | 0.00144409  | 0.995198 | 0.00144494  | 0.995719 |
| PhcycC3H3_A+H                 | 0.00120489  | 0.996403 | 0.00120559  | 0.996924 |
| PhcycC3H3_B+H                 | 0.00109183  | 0.997495 | 0.00109247  | 0.998017 |
| PhCCH+CH3                     | 0.000988680 | 0.998483 | 0.000989264 | 0.999006 |
| Phenyl+cycC3H4                | 0.000523345 | 0.999007 | 0.000000    | 0.999006 |
| rad35                         | 0.000519418 | 0.999526 | 0.000519722 | 0.999526 |
| PAH10+CH3                     | 0.000132940 | 0.999659 | 0.000133019 | 0.999659 |
| rad37                         | 0.000103969 | 0.999763 | 0.000104030 | 0.999763 |
| PAH7+H                        | 9.76629e-05 | 0.999861 | 9.77202e-05 | 0.999860 |
| PAH9+H                        | 3.30451e-05 | 0.999894 | 3.30646e-05 | 0.999893 |
| rad38                         | 2.89869e-05 | 0.999923 | 2.90039e-05 | 0.999922 |
| PAH3+H                        | 2.09773e-05 | 0.999944 | 2.09896e-05 | 0.999943 |
| rad30                         | 2.03484e-05 | 0.999964 | 2.03603e-05 | 0.999964 |
| rad39                         | 1.60326e-05 | 0.999980 | 1.60420e-05 | 0.999980 |
| rad46                         | 4.60489e-06 | 0.999985 | 4.60759e-06 | 0.999984 |
| rad50                         | 3.39256e-06 | 0.999988 | 3.39455e-06 | 0.999988 |
| rad59                         | 2.10237e-06 | 0.999990 | 2.10360e-06 | 0.999990 |
| PAH1+H                        | 2.05214e-06 | 0.999992 | 2.05334e-06 | 0.999992 |
| rad60syn                      | 1.88965e-06 | 0.999994 | 1.89076e-06 | 0.999994 |
| rad54                         | 1.78086e-06 | 0.999996 | 1.78190e-06 | 0.999996 |
| rad60anti                     | 1.16973e-06 | 0.999997 | 1.17042e-06 | 0.999997 |
| rad51                         | 8.27129e-07 | 0.999998 | 8.27613e-07 | 0.999998 |
| rad43                         | 6.31782e-07 | 0.999998 | 6.32153e-07 | 0.999998 |
| rad70                         | 5.60217e-07 | 0.999999 | 5.60546e-07 | 0.999999 |
| rad52                         | 2.70713e-07 | 0.999999 | 2.70872e-07 | 0.999999 |
| rad58                         | 1.78428e-07 | 0.999999 | 1.78532e-07 | 0.999999 |
| rad61                         | 1.46277e-07 | 1.000000 | 1.46363e-07 | 0.999999 |
| rad34                         | 1.30056e-07 | 1.000000 | 1.30132e-07 | 1.000000 |
| rad55                         | 1.23571e-07 | 1.000000 | 1.23644e-07 | 1.000000 |
| rad62                         | 4.61529e-08 | 1.000000 | 4.61799e-08 | 1.000000 |
| rad41                         | 3.74002e-08 | 1.000000 | 3.74221e-08 | 1.000000 |
| PAH8+H                        | 2.63148e-08 | 1.000000 | 2.63303e-08 | 1.000000 |
| rad53                         | 2.60384e-08 | 1.000000 | 2.60537e-08 | 1.000000 |
| rad65                         | 2.42340e-08 | 1.000000 | 2.42482e-08 | 1.000000 |
| rad56                         | 2.33522e-08 | 1.000000 | 2.33659e-08 | 1.000000 |

|           |             |         |             |          |
|-----------|-------------|---------|-------------|----------|
| rad71     | 1.41523e-08 | 1.00000 | 1.41606e-08 | 1.000000 |
| rad73     | 1.20322e-08 | 1.00000 | 1.20393e-08 | 1.000000 |
| rad64     | 8.79755e-09 | 1.00000 | 8.80273e-09 | 1.000000 |
| rad68syn  | 6.90097e-09 | 1.00000 | 6.90502e-09 | 1.000000 |
| rad40syn  | 4.57744e-09 | 1.00000 | 4.58013e-09 | 1.000000 |
| rad68anti | 4.51464e-09 | 1.00000 | 4.51729e-09 | 1.000000 |
| rad40anti | 3.59045e-09 | 1.00000 | 3.59256e-09 | 1.000000 |
| rad42     | 3.00666e-09 | 1.00000 | 3.00843e-09 | 1.000000 |
| rad72     | 3.28506e-10 | 1.00000 | 3.28699e-10 | 1.000000 |
| rad9      | 1.25435e-11 | 1.00000 | 1.25508e-11 | 1.000000 |
| rad12     | 4.68956e-14 | 1.00000 | 4.69231e-14 | 1.000000 |
| rad15     | 3.69557e-14 | 1.00000 | 3.69773e-14 | 1.000000 |
| rad23     | 4.05197e-15 | 1.00000 | 4.05434e-15 | 1.000000 |
| rad45     | 1.87784e-15 | 1.00000 | 1.87894e-15 | 1.000000 |
| rad11     | 1.44875e-15 | 1.00000 | 1.44959e-15 | 1.000000 |
| rad19anti | 1.15118e-15 | 1.00000 | 1.15186e-15 | 1.000000 |
| rad6      | 9.17842e-16 | 1.00000 | 9.18374e-16 | 1.000000 |
| rad2      | 6.76195e-16 | 1.00000 | 6.76592e-16 | 1.000000 |
| rad8      | 5.66687e-16 | 1.00000 | 5.67019e-16 | 1.000000 |
| rad21     | 3.67060e-16 | 1.00000 | 3.67275e-16 | 1.000000 |
| rad7      | 3.48369e-16 | 1.00000 | 3.48574e-16 | 1.000000 |
| rad13     | 2.61025e-16 | 1.00000 | 2.61178e-16 | 1.000000 |
| rad10     | 2.50333e-16 | 1.00000 | 2.50480e-16 | 1.000000 |
| rad1      | 2.01063e-16 | 1.00000 | 2.01181e-16 | 1.000000 |
| rad36     | 1.96414e-16 | 1.00000 | 1.96529e-16 | 1.000000 |
| rad19syn  | 8.90593e-17 | 1.00000 | 8.91116e-17 | 1.000000 |
| rad20     | 8.28826e-17 | 1.00000 | 8.29310e-17 | 1.000000 |
| rad18     | 5.37820e-17 | 1.00000 | 5.38136e-17 | 1.000000 |
| rad24     | 1.80313e-17 | 1.00000 | 1.80420e-17 | 1.000000 |
| rad33     | 1.72625e-17 | 1.00000 | 1.72727e-17 | 1.000000 |
| rad25     | 7.72646e-18 | 1.00000 | 7.73097e-18 | 1.000000 |
| rad3      | 5.30769e-18 | 1.00000 | 5.31080e-18 | 1.000000 |
| rad4      | 4.29474e-18 | 1.00000 | 4.29726e-18 | 1.000000 |
| rad27     | 3.50744e-18 | 1.00000 | 3.50950e-18 | 1.000000 |
| rad26     | 2.35372e-18 | 1.00000 | 2.35511e-18 | 1.000000 |
| rad14     | 3.02573e-19 | 1.00000 | 3.02751e-19 | 1.000000 |
| rad31     | 2.62635e-19 | 1.00000 | 2.62789e-19 | 1.000000 |
| rad28     | 7.25004e-20 | 1.00000 | 7.25435e-20 | 1.000000 |
| rad47     | 7.15113e-20 | 1.00000 | 7.15531e-20 | 1.000000 |
| rad22     | 4.87457e-20 | 1.00000 | 4.87744e-20 | 1.000000 |
| rad5      | 1.14673e-21 | 1.00000 | 1.14741e-21 | 1.000000 |

0.100000000E-04 Pa, 1500.00000 K

| Rate constant             | True (fraction)       | Effective (fraction)  |
|---------------------------|-----------------------|-----------------------|
| Total                     | 7.80417e-12 (1.00 )   | 7.79561e-12 (1.00 )   |
| Formation of rad19        | 5.22661e-12 (0.670 )  | 5.21915e-12 (0.669 )  |
| H-abstraction to cyc2enyl | 1.80920e-12 (0.232 )  | 1.80920e-12 (0.232 )  |
| H-abstraction to cyclenyl | 7.68359e-13 (0.0985 ) | 7.67262e-13 (0.0984 ) |

| species                       | PYtrue      | Cumul    | PYeffective | Cumul    |
|-------------------------------|-------------|----------|-------------|----------|
| Indene+H                      | 0.505870    | 0.505870 | 0.506425    | 0.506425 |
| Benzene+cycloprop-2-enylidene | 0.231825    | 0.737695 | 0.232079    | 0.738505 |
| PhCHCCH2+H                    | 0.135967    | 0.873662 | 0.136116    | 0.874621 |
| Benzene+cycloprop-1-enylidene | 0.0984549   | 0.972117 | 0.0984223   | 0.973043 |
| Ph+MeAc                       | 0.00470570  | 0.976823 | 0.00471086  | 0.977754 |
| Ph+Allene                     | 0.00464760  | 0.981470 | 0.00465271  | 0.982407 |
| C2H2+PhCH2                    | 0.00447301  | 0.985943 | 0.00447791  | 0.986885 |
| PhCH2CCH+H                    | 0.00304819  | 0.988991 | 0.00305154  | 0.989936 |
| PhcycC3H3_A+H                 | 0.00198976  | 0.990981 | 0.00199195  | 0.991928 |
| PhcycC3H3_B+H                 | 0.00193280  | 0.992914 | 0.00193492  | 0.993863 |
| PhCCCH3+H                     | 0.00187667  | 0.994791 | 0.00187873  | 0.995742 |
| rad67                         | 0.00179097  | 0.996582 | 0.00179294  | 0.997535 |
| PhCCH+CH3                     | 0.00117783  | 0.997759 | 0.00117912  | 0.998714 |
| Phenyl+cycC3H4                | 0.000956146 | 0.998716 | 0.000000    | 0.998714 |
| rad35                         | 0.000644848 | 0.999360 | 0.000645555 | 0.999360 |
| PAH10+CH3                     | 0.000194190 | 0.999555 | 0.000194404 | 0.999554 |
| rad37                         | 0.000129806 | 0.999684 | 0.000129949 | 0.999684 |
| PAH7+H                        | 0.000116417 | 0.999801 | 0.000116546 | 0.999800 |
| PAH9+H                        | 4.88535e-05 | 0.999850 | 4.89071e-05 | 0.999849 |
| rad38                         | 4.16011e-05 | 0.999891 | 4.16467e-05 | 0.999891 |
| PAH3+H                        | 3.23374e-05 | 0.999924 | 3.23729e-05 | 0.999923 |
| rad30                         | 2.62808e-05 | 0.999950 | 2.63097e-05 | 0.999950 |
| rad39                         | 1.87895e-05 | 0.999969 | 1.88102e-05 | 0.999968 |
| rad46                         | 7.16199e-06 | 0.999976 | 7.16986e-06 | 0.999976 |
| rad50                         | 5.93797e-06 | 0.999982 | 5.94449e-06 | 0.999982 |
| PAH1+H                        | 3.25722e-06 | 0.999985 | 3.26081e-06 | 0.999985 |
| rad59                         | 3.16156e-06 | 0.999988 | 3.16503e-06 | 0.999988 |

|           |             |          |             |          |
|-----------|-------------|----------|-------------|----------|
| rad60syn  | 2.67968e-06 | 0.999991 | 2.68262e-06 | 0.999991 |
| rad54     | 2.39838e-06 | 0.999993 | 2.40102e-06 | 0.999993 |
| rad60anti | 1.66867e-06 | 0.999995 | 1.67050e-06 | 0.999995 |
| rad51     | 1.57342e-06 | 0.999996 | 1.57515e-06 | 0.999996 |
| rad43     | 9.05576e-07 | 0.999997 | 9.06568e-07 | 0.999997 |
| rad70     | 8.42763e-07 | 0.999998 | 8.43688e-07 | 0.999998 |
| rad52     | 4.92950e-07 | 0.999999 | 4.93491e-07 | 0.999999 |
| rad58     | 3.04448e-07 | 0.999999 | 3.04782e-07 | 0.999999 |
| rad61     | 2.56145e-07 | 0.999999 | 2.56426e-07 | 0.999999 |
| rad34     | 2.04934e-07 | 1.000000 | 2.05159e-07 | 0.999999 |
| rad55     | 1.72012e-07 | 1.000000 | 1.72201e-07 | 1.000000 |
| rad62     | 6.20586e-08 | 1.000000 | 6.21267e-08 | 1.000000 |
| rad41     | 5.99063e-08 | 1.000000 | 5.99721e-08 | 1.000000 |
| PAH8+H    | 5.38671e-08 | 1.000000 | 5.39262e-08 | 1.000000 |
| rad65     | 4.55485e-08 | 1.000000 | 4.55985e-08 | 1.000000 |
| rad53     | 4.12866e-08 | 1.000000 | 4.13319e-08 | 1.000000 |
| rad56     | 3.95671e-08 | 1.000000 | 3.96105e-08 | 1.000000 |
| rad71     | 3.49994e-08 | 1.000000 | 3.50378e-08 | 1.000000 |
| rad73     | 2.80690e-08 | 1.000000 | 2.80998e-08 | 1.000000 |
| rad64     | 1.41255e-08 | 1.000000 | 1.41409e-08 | 1.000000 |
| rad68syn  | 1.26336e-08 | 1.000000 | 1.26475e-08 | 1.000000 |
| rad40syn  | 8.93581e-09 | 1.000000 | 8.94564e-09 | 1.000000 |
| rad68anti | 8.24821e-09 | 1.000000 | 8.25726e-09 | 1.000000 |
| rad40anti | 7.05383e-09 | 1.000000 | 7.06153e-09 | 1.000000 |
| rad42     | 4.46777e-09 | 1.000000 | 4.47268e-09 | 1.000000 |
| rad72     | 9.20557e-10 | 1.000000 | 9.21571e-10 | 1.000000 |
| rad9      | 7.93344e-12 | 1.000000 | 7.94212e-12 | 1.000000 |
| rad15     | 7.50797e-14 | 1.000000 | 7.51619e-14 | 1.000000 |
| rad12     | 3.66370e-14 | 1.000000 | 3.66772e-14 | 1.000000 |
| rad23     | 3.61470e-15 | 1.000000 | 3.61867e-15 | 1.000000 |
| rad11     | 2.20562e-15 | 1.000000 | 2.20804e-15 | 1.000000 |
| rad45     | 1.70690e-15 | 1.000000 | 1.70877e-15 | 1.000000 |
| rad6      | 1.21797e-15 | 1.000000 | 1.21930e-15 | 1.000000 |
| rad19anti | 9.04718e-16 | 1.000000 | 9.05717e-16 | 1.000000 |
| rad7      | 7.03802e-16 | 1.000000 | 7.04580e-16 | 1.000000 |
| rad8      | 6.24614e-16 | 1.000000 | 6.25299e-16 | 1.000000 |
| rad10     | 5.37538e-16 | 1.000000 | 5.38128e-16 | 1.000000 |
| rad2      | 4.99077e-16 | 1.000000 | 4.99625e-16 | 1.000000 |
| rad21     | 3.97611e-16 | 1.000000 | 3.98048e-16 | 1.000000 |
| rad13     | 2.43538e-16 | 1.000000 | 2.43806e-16 | 1.000000 |
| rad36     | 1.79697e-16 | 1.000000 | 1.79894e-16 | 1.000000 |
| rad1      | 1.50405e-16 | 1.000000 | 1.50570e-16 | 1.000000 |
| rad18     | 1.01390e-16 | 1.000000 | 1.01502e-16 | 1.000000 |
| rad20     | 8.29636e-17 | 1.000000 | 8.30546e-17 | 1.000000 |
| rad19syn  | 7.89908e-17 | 1.000000 | 7.90771e-17 | 1.000000 |
| rad26     | 2.52416e-17 | 1.000000 | 2.52693e-17 | 1.000000 |
| rad24     | 1.99082e-17 | 1.000000 | 1.99301e-17 | 1.000000 |
| rad33     | 1.52243e-17 | 1.000000 | 1.52410e-17 | 1.000000 |
| rad25     | 8.67515e-18 | 1.000000 | 8.68467e-18 | 1.000000 |
| rad27     | 3.81185e-18 | 1.000000 | 3.81603e-18 | 1.000000 |
| rad3      | 3.74489e-18 | 1.000000 | 3.74901e-18 | 1.000000 |
| rad4      | 3.00474e-18 | 1.000000 | 3.00804e-18 | 1.000000 |
| rad28     | 4.63959e-19 | 1.000000 | 4.64468e-19 | 1.000000 |
| rad22     | 3.39928e-19 | 1.000000 | 3.40301e-19 | 1.000000 |
| rad14     | 3.12704e-19 | 1.000000 | 3.13047e-19 | 1.000000 |
| rad31     | 2.56266e-19 | 1.000000 | 2.56547e-19 | 1.000000 |
| rad47     | 1.33181e-19 | 1.000000 | 1.33327e-19 | 1.000000 |
| rad5      | 2.92015e-20 | 1.000000 | 2.92336e-20 | 1.000000 |

0.100000000E-05 Pa, 20.0000000 K

| Rate constant             | True (fraction)         | Effective (fraction)    |
|---------------------------|-------------------------|-------------------------|
| Total                     | 1.24541e-22 (1.00 )     | 1.24541e-22 (1.00 )     |
| Formation of rad19        | 1.24541e-22 (1.00 )     | 1.24541e-22 (1.00 )     |
| H-abstraction to cyc2enyl | 3.84323e-68 (3.09e-46)  | 3.84323e-68 (3.09e-46)  |
| H-abstraction to cyclenyl | 6.26313e-106 (5.03e-84) | 6.26313e-106 (5.03e-84) |

| species    | PYtrue      | Cumul    | PYeffective | Cumul    |
|------------|-------------|----------|-------------|----------|
| Indene+H   | 0.999772    | 0.999772 | 0.999772    | 0.999772 |
| PhCHCCH2+H | 0.000217190 | 0.999989 | 0.000217190 | 0.999989 |
| PhCCH+CH3  | 3.74993e-06 | 0.999993 | 3.74993e-06 | 0.999993 |
| C2H2+PhCH2 | 2.66078e-06 | 0.999996 | 2.66078e-06 | 0.999996 |
| PhCCCH3+H  | 2.10744e-06 | 0.999998 | 2.10744e-06 | 0.999998 |
| Ph+MeAc    | 1.55535e-06 | 0.999999 | 1.55535e-06 | 0.999999 |
| rad67      | 4.72016e-07 | 1.000000 | 4.72016e-07 | 1.000000 |
| rad35      | 2.09059e-07 | 1.000000 | 2.09059e-07 | 1.000000 |
| Ph+Allene  | 1.34638e-07 | 1.000000 | 1.34638e-07 | 1.000000 |
| PAH7+H     | 1.78372e-08 | 1.000000 | 1.78372e-08 | 1.000000 |

|                               |             |         |             |         |
|-------------------------------|-------------|---------|-------------|---------|
| PhCH2CCH+H                    | 1.63594e-08 | 1.00000 | 1.63594e-08 | 1.00000 |
| rad39                         | 5.03015e-09 | 1.00000 | 5.03015e-09 | 1.00000 |
| rad37                         | 4.62672e-09 | 1.00000 | 4.62672e-09 | 1.00000 |
| rad30                         | 3.90781e-09 | 1.00000 | 3.90781e-09 | 1.00000 |
| PAH9+H                        | 2.53961e-10 | 1.00000 | 2.53961e-10 | 1.00000 |
| rad38                         | 1.06938e-10 | 1.00000 | 1.06938e-10 | 1.00000 |
| rad60syn                      | 1.69319e-11 | 1.00000 | 1.69319e-11 | 1.00000 |
| rad60anti                     | 8.26559e-12 | 1.00000 | 8.26559e-12 | 1.00000 |
| PAH3+H                        | 6.72155e-12 | 1.00000 | 6.72155e-12 | 1.00000 |
| rad46                         | 6.42599e-12 | 1.00000 | 6.42599e-12 | 1.00000 |
| PAH10+CH3                     | 5.52880e-12 | 1.00000 | 5.52880e-12 | 1.00000 |
| rad59                         | 1.39467e-12 | 1.00000 | 1.39467e-12 | 1.00000 |
| PhcycC3H3_A+H                 | 4.13677e-13 | 1.00000 | 4.13677e-13 | 1.00000 |
| rad43                         | 2.58810e-13 | 1.00000 | 2.58810e-13 | 1.00000 |
| rad54                         | 2.05784e-13 | 1.00000 | 2.05784e-13 | 1.00000 |
| rad62                         | 5.54304e-14 | 1.00000 | 5.54304e-14 | 1.00000 |
| rad50                         | 4.23314e-14 | 1.00000 | 4.23314e-14 | 1.00000 |
| rad70                         | 3.14360e-15 | 1.00000 | 3.14360e-15 | 1.00000 |
| rad55                         | 1.37811e-15 | 1.00000 | 1.37811e-15 | 1.00000 |
| PAH1+H                        | 5.58589e-16 | 1.00000 | 5.58589e-16 | 1.00000 |
| rad52                         | 2.67813e-16 | 1.00000 | 2.67813e-16 | 1.00000 |
| rad58                         | 7.50233e-17 | 1.00000 | 7.50233e-17 | 1.00000 |
| rad51                         | 6.49686e-17 | 1.00000 | 6.49686e-17 | 1.00000 |
| rad34                         | 2.91047e-17 | 1.00000 | 2.91047e-17 | 1.00000 |
| Phenyl+cycC3H4                | 2.77347e-17 | 1.00000 | 0.00000     | 1.00000 |
| rad42                         | 3.04828e-18 | 1.00000 | 3.04828e-18 | 1.00000 |
| rad41                         | 2.76406e-18 | 1.00000 | 2.76406e-18 | 1.00000 |
| rad65                         | 1.27713e-18 | 1.00000 | 1.27713e-18 | 1.00000 |
| rad6                          | 1.90001e-27 | 1.00000 | 1.90001e-27 | 1.00000 |
| PhcycC3H3_B+H                 | 2.48349e-29 | 1.00000 | 2.48349e-29 | 1.00000 |
| rad28                         | 1.00334e-29 | 1.00000 | 1.00334e-29 | 1.00000 |
| rad26                         | 6.39777e-30 | 1.00000 | 6.39777e-30 | 1.00000 |
| rad53                         | 1.11872e-30 | 1.00000 | 1.11872e-30 | 1.00000 |
| rad2                          | 7.15883e-31 | 1.00000 | 7.15883e-31 | 1.00000 |
| rad47                         | 5.36323e-31 | 1.00000 | 5.36323e-31 | 1.00000 |
| rad7                          | 1.37114e-31 | 1.00000 | 1.37114e-31 | 1.00000 |
| rad1                          | 4.52201e-32 | 1.00000 | 4.52201e-32 | 1.00000 |
| rad10                         | 3.65995e-32 | 1.00000 | 3.65995e-32 | 1.00000 |
| rad11                         | 3.35688e-32 | 1.00000 | 3.35688e-32 | 1.00000 |
| rad64                         | 4.89222e-33 | 1.00000 | 4.89222e-33 | 1.00000 |
| rad3                          | 4.61323e-33 | 1.00000 | 4.61323e-33 | 1.00000 |
| rad4                          | 2.33002e-33 | 1.00000 | 2.33002e-33 | 1.00000 |
| rad13                         | 7.56986e-34 | 1.00000 | 7.56986e-34 | 1.00000 |
| rad14                         | 2.30566e-34 | 1.00000 | 2.30566e-34 | 1.00000 |
| rad25                         | 1.06282e-34 | 1.00000 | 1.06282e-34 | 1.00000 |
| rad9                          | 3.83097e-35 | 1.00000 | 3.83097e-35 | 1.00000 |
| rad27                         | 2.20785e-35 | 1.00000 | 2.20785e-35 | 1.00000 |
| rad19anti                     | 1.76073e-35 | 1.00000 | 1.76073e-35 | 1.00000 |
| rad33                         | 1.42243e-36 | 1.00000 | 1.42243e-36 | 1.00000 |
| rad5                          | 7.33417e-37 | 1.00000 | 7.33417e-37 | 1.00000 |
| rad15                         | 1.65642e-38 | 1.00000 | 1.65642e-38 | 1.00000 |
| rad31                         | 1.08616e-39 | 1.00000 | 1.08616e-39 | 1.00000 |
| rad61                         | 5.02970e-40 | 1.00000 | 5.02970e-40 | 1.00000 |
| rad20                         | 9.10906e-42 | 1.00000 | 9.10906e-42 | 1.00000 |
| rad21                         | 7.01859e-42 | 1.00000 | 7.01859e-42 | 1.00000 |
| rad56                         | 3.36999e-42 | 1.00000 | 3.36999e-42 | 1.00000 |
| rad23                         | 2.21398e-43 | 1.00000 | 2.21398e-43 | 1.00000 |
| rad12                         | 2.18442e-43 | 1.00000 | 2.18442e-43 | 1.00000 |
| rad18                         | 8.61487e-44 | 1.00000 | 8.61487e-44 | 1.00000 |
| rad68syn                      | 2.54067e-44 | 1.00000 | 2.54067e-44 | 1.00000 |
| rad68anti                     | 2.17435e-44 | 1.00000 | 2.17435e-44 | 1.00000 |
| rad22                         | 5.00038e-45 | 1.00000 | 5.00038e-45 | 1.00000 |
| rad45                         | 1.41264e-45 | 1.00000 | 1.41264e-45 | 1.00000 |
| rad19syn                      | 1.37416e-45 | 1.00000 | 1.37416e-45 | 1.00000 |
| Benzene+cycloprop-2-enylidene | 3.08591e-46 | 1.00000 | 3.08591e-46 | 1.00000 |
| rad36                         | 8.66418e-47 | 1.00000 | 8.66418e-47 | 1.00000 |
| rad24                         | 7.44560e-48 | 1.00000 | 7.44560e-48 | 1.00000 |
| rad73                         | 2.07039e-52 | 1.00000 | 2.07039e-52 | 1.00000 |
| rad40syn                      | 2.93473e-53 | 1.00000 | 2.93473e-53 | 1.00000 |
| rad40anti                     | 2.41849e-53 | 1.00000 | 2.41849e-53 | 1.00000 |
| PAH8+H                        | 1.12095e-57 | 1.00000 | 1.12095e-57 | 1.00000 |
| rad71                         | 3.49462e-61 | 1.00000 | 3.49462e-61 | 1.00000 |
| rad8                          | 2.40365e-65 | 1.00000 | 2.40365e-65 | 1.00000 |
| Benzene+cycloprop-1-enylidene | 5.02895e-84 | 1.00000 | 5.02895e-84 | 1.00000 |

0.100000000E-05 Pa, 30.0000000 K

| Rate constant | True (fraction)    | Effective (fraction) |
|---------------|--------------------|----------------------|
| Total         | 8.13009e-20 (1.00) | 8.13009e-20 (1.00)   |

Formation of rad19 | 8.13009e-20 (1.00 ) 8.13009e-20 (1.00 )  
H-abstraction to cyc2enyl | 1.08880e-49 (1.34e-30) 1.08880e-49 (1.34e-30)  
H-abstraction to cyclenyl | 7.55172e-75 (9.29e-56) 7.55172e-75 (9.29e-56)

| species                       | PYtrue      | Cumul    | PYeffective | Cumul    |
|-------------------------------|-------------|----------|-------------|----------|
| Indene+H                      | 0.999770    | 0.999770 | 0.999770    | 0.999770 |
| PhCHCCH2+H                    | 0.000218740 | 0.999989 | 0.000218740 | 0.999989 |
| PhCCH+CH3                     | 3.77922e-06 | 0.999993 | 3.77922e-06 | 0.999993 |
| C2H2+PhCH2                    | 2.68544e-06 | 0.999995 | 2.68544e-06 | 0.999995 |
| PhCCCH3+H                     | 2.12543e-06 | 0.999997 | 2.12543e-06 | 0.999997 |
| Ph+MeAc                       | 1.57151e-06 | 0.999999 | 1.57151e-06 | 0.999999 |
| rad67                         | 4.76660e-07 | 0.999999 | 4.76660e-07 | 0.999999 |
| rad35                         | 2.11031e-07 | 1.000000 | 2.11031e-07 | 1.000000 |
| Ph+Allene                     | 1.36498e-07 | 1.000000 | 1.36498e-07 | 1.000000 |
| PAH7+H                        | 1.80489e-08 | 1.000000 | 1.80489e-08 | 1.000000 |
| PhCH2CCH+H                    | 1.66214e-08 | 1.000000 | 1.66214e-08 | 1.000000 |
| rad39                         | 5.09006e-09 | 1.000000 | 5.09006e-09 | 1.000000 |
| rad37                         | 4.68501e-09 | 1.000000 | 4.68501e-09 | 1.000000 |
| rad30                         | 3.94539e-09 | 1.000000 | 3.94539e-09 | 1.000000 |
| PAH9+H                        | 2.57108e-10 | 1.000000 | 2.57108e-10 | 1.000000 |
| rad38                         | 1.08384e-10 | 1.000000 | 1.08384e-10 | 1.000000 |
| rad60syn                      | 1.71588e-11 | 1.000000 | 1.71588e-11 | 1.000000 |
| rad60anti                     | 8.37914e-12 | 1.000000 | 8.37914e-12 | 1.000000 |
| PAH3+H                        | 6.84326e-12 | 1.000000 | 6.84326e-12 | 1.000000 |
| rad46                         | 6.51963e-12 | 1.000000 | 6.51963e-12 | 1.000000 |
| PAH10+CH3                     | 5.67120e-12 | 1.000000 | 5.67120e-12 | 1.000000 |
| rad59                         | 1.41896e-12 | 1.000000 | 1.41896e-12 | 1.000000 |
| PhcycC3H3_A+H                 | 4.42422e-13 | 1.000000 | 4.42422e-13 | 1.000000 |
| rad43                         | 2.64743e-13 | 1.000000 | 2.64743e-13 | 1.000000 |
| rad54                         | 2.11003e-13 | 1.000000 | 2.11003e-13 | 1.000000 |
| rad62                         | 5.67504e-14 | 1.000000 | 5.67504e-14 | 1.000000 |
| rad50                         | 4.32260e-14 | 1.000000 | 4.32260e-14 | 1.000000 |
| rad70                         | 3.24821e-15 | 1.000000 | 3.24821e-15 | 1.000000 |
| rad55                         | 1.42504e-15 | 1.000000 | 1.42504e-15 | 1.000000 |
| PAH1+H                        | 5.84853e-16 | 1.000000 | 5.84853e-16 | 1.000000 |
| rad52                         | 2.74819e-16 | 1.000000 | 2.74819e-16 | 1.000000 |
| rad58                         | 7.77933e-17 | 1.000000 | 7.77933e-17 | 1.000000 |
| rad51                         | 6.70681e-17 | 1.000000 | 6.70681e-17 | 1.000000 |
| Phenyl+cycC3H4                | 5.25631e-17 | 1.000000 | 0.000000    | 1.000000 |
| rad34                         | 3.05742e-17 | 1.000000 | 3.05742e-17 | 1.000000 |
| rad42                         | 3.20851e-18 | 1.000000 | 3.20851e-18 | 1.000000 |
| rad41                         | 2.96188e-18 | 1.000000 | 2.96188e-18 | 1.000000 |
| rad65                         | 1.32250e-18 | 1.000000 | 1.32250e-18 | 1.000000 |
| rad6                          | 2.22647e-28 | 1.000000 | 2.22647e-28 | 1.000000 |
| PhcycC3H3_B+H                 | 6.03248e-29 | 1.000000 | 6.03248e-29 | 1.000000 |
| rad28                         | 2.00714e-30 | 1.000000 | 2.00714e-30 | 1.000000 |
| rad26                         | 1.75908e-30 | 1.000000 | 1.75908e-30 | 1.000000 |
| Benzene+cycloprop-2-enylidene | 1.33923e-30 | 1.000000 | 1.33923e-30 | 1.000000 |
| rad53                         | 8.32720e-31 | 1.000000 | 8.32720e-31 | 1.000000 |
| rad47                         | 2.66203e-31 | 1.000000 | 2.66203e-31 | 1.000000 |
| rad2                          | 8.36027e-32 | 1.000000 | 8.36027e-32 | 1.000000 |
| rad7                          | 1.60692e-32 | 1.000000 | 1.60692e-32 | 1.000000 |
| rad1                          | 5.28371e-33 | 1.000000 | 5.28371e-33 | 1.000000 |
| rad10                         | 4.28528e-33 | 1.000000 | 4.28528e-33 | 1.000000 |
| rad11                         | 3.93349e-33 | 1.000000 | 3.93349e-33 | 1.000000 |
| rad64                         | 3.66442e-33 | 1.000000 | 3.66442e-33 | 1.000000 |
| rad3                          | 5.42266e-34 | 1.000000 | 5.42266e-34 | 1.000000 |
| rad4                          | 2.73914e-34 | 1.000000 | 2.73914e-34 | 1.000000 |
| rad14                         | 1.12378e-34 | 1.000000 | 1.12378e-34 | 1.000000 |
| rad13                         | 8.87464e-35 | 1.000000 | 8.87464e-35 | 1.000000 |
| rad25                         | 5.19473e-35 | 1.000000 | 5.19473e-35 | 1.000000 |
| rad27                         | 1.06285e-35 | 1.000000 | 1.06285e-35 | 1.000000 |
| rad19anti                     | 9.43586e-36 | 1.000000 | 9.43586e-36 | 1.000000 |
| rad9                          | 6.69992e-36 | 1.000000 | 6.69992e-36 | 1.000000 |
| rad5                          | 2.15601e-37 | 1.000000 | 2.15601e-37 | 1.000000 |
| rad33                         | 1.67113e-37 | 1.000000 | 1.67113e-37 | 1.000000 |
| rad15                         | 2.89813e-39 | 1.000000 | 2.89813e-39 | 1.000000 |
| rad31                         | 5.66579e-40 | 1.000000 | 5.66579e-40 | 1.000000 |
| rad61                         | 3.99442e-40 | 1.000000 | 3.99442e-40 | 1.000000 |
| rad20                         | 3.26847e-42 | 1.000000 | 3.26847e-42 | 1.000000 |
| rad56                         | 2.62111e-42 | 1.000000 | 2.62111e-42 | 1.000000 |
| rad21                         | 2.56629e-42 | 1.000000 | 2.56629e-42 | 1.000000 |
| rad12                         | 5.15333e-44 | 1.000000 | 5.15333e-44 | 1.000000 |
| rad18                         | 3.76140e-44 | 1.000000 | 3.76140e-44 | 1.000000 |
| rad23                         | 2.10153e-44 | 1.000000 | 2.10153e-44 | 1.000000 |
| rad68syn                      | 1.99237e-44 | 1.000000 | 1.99237e-44 | 1.000000 |
| rad68anti                     | 1.70467e-44 | 1.000000 | 1.70467e-44 | 1.000000 |
| rad19syn                      | 8.38610e-46 | 1.000000 | 8.38610e-46 | 1.000000 |
| rad22                         | 6.68079e-46 | 1.000000 | 6.68079e-46 | 1.000000 |

|                               |             |          |             |          |
|-------------------------------|-------------|----------|-------------|----------|
| rad45                         | 1.32895e-46 | 1.000000 | 1.32895e-46 | 1.000000 |
| rad36                         | 8.14950e-48 | 1.000000 | 8.14950e-48 | 1.000000 |
| rad24                         | 3.80191e-48 | 1.000000 | 3.80191e-48 | 1.000000 |
| rad73                         | 1.66968e-52 | 1.000000 | 1.66968e-52 | 1.000000 |
| rad40syn                      | 2.57254e-53 | 1.000000 | 2.57254e-53 | 1.000000 |
| rad40anti                     | 2.11974e-53 | 1.000000 | 2.11974e-53 | 1.000000 |
| Benzene+cycloprop-1-enylidene | 9.28861e-56 | 1.000000 | 9.28861e-56 | 1.000000 |
| PAH8+H                        | 1.00611e-57 | 1.000000 | 1.00611e-57 | 1.000000 |
| rad71                         | 2.96455e-61 | 1.000000 | 2.96455e-61 | 1.000000 |
| rad8                          | 1.26714e-65 | 1.000000 | 1.26714e-65 | 1.000000 |

0.100000000E-05 Pa, 40.000000 K

| Rate constant             | True (fraction)        | Effective (fraction)   |
|---------------------------|------------------------|------------------------|
| Total                     | 2.24819e-18 (1.00 )    | 2.24819e-18 (1.00 )    |
| Formation of rad19        | 2.24819e-18 (1.00 )    | 2.24819e-18 (1.00 )    |
| H-abstraction to cyc2enyl | 1.72361e-40 (7.67e-23) | 1.72361e-40 (7.67e-23) |
| H-abstraction to cyclenyl | 2.48792e-59 (1.11e-41) | 2.48792e-59 (1.11e-41) |

| species                       | PYtrue      | Cumul    | PYeffective | Cumul    |
|-------------------------------|-------------|----------|-------------|----------|
| Indene+H                      | 0.999767    | 0.999767 | 0.999767    | 0.999767 |
| PhCHCCH2+H                    | 0.000221748 | 0.999989 | 0.000221748 | 0.999989 |
| PhCCH+CH3                     | 3.83605e-06 | 0.999993 | 3.83605e-06 | 0.999993 |
| C2H2+PhCH2                    | 2.73340e-06 | 0.999995 | 2.73340e-06 | 0.999995 |
| PhCCH3+H                      | 2.16038e-06 | 0.999997 | 2.16038e-06 | 0.999997 |
| Ph+MeAc                       | 1.60299e-06 | 0.999999 | 1.60299e-06 | 0.999999 |
| rad67                         | 4.85697e-07 | 1.000000 | 4.85697e-07 | 1.000000 |
| rad35                         | 2.14867e-07 | 1.000000 | 2.14867e-07 | 1.000000 |
| Ph+Allene                     | 1.40139e-07 | 1.000000 | 1.40139e-07 | 1.000000 |
| PAH7+H                        | 1.84620e-08 | 1.000000 | 1.84620e-08 | 1.000000 |
| PhCH2CCH+H                    | 1.71356e-08 | 1.000000 | 1.71356e-08 | 1.000000 |
| rad39                         | 5.20698e-09 | 1.000000 | 5.20698e-09 | 1.000000 |
| rad37                         | 4.79888e-09 | 1.000000 | 4.79888e-09 | 1.000000 |
| rad30                         | 4.01853e-09 | 1.000000 | 4.01853e-09 | 1.000000 |
| PAH9+H                        | 2.63258e-10 | 1.000000 | 2.63258e-10 | 1.000000 |
| rad38                         | 1.11216e-10 | 1.000000 | 1.11216e-10 | 1.000000 |
| rad60syn                      | 1.76027e-11 | 1.000000 | 1.76027e-11 | 1.000000 |
| rad60anti                     | 8.60137e-12 | 1.000000 | 8.60137e-12 | 1.000000 |
| PAH3+H                        | 7.08284e-12 | 1.000000 | 7.08284e-12 | 1.000000 |
| rad46                         | 6.70312e-12 | 1.000000 | 6.70312e-12 | 1.000000 |
| PAH10+CH3                     | 5.95405e-12 | 1.000000 | 5.95405e-12 | 1.000000 |
| rad59                         | 1.46672e-12 | 1.000000 | 1.46672e-12 | 1.000000 |
| PhcycC3H3_A+H                 | 5.01394e-13 | 1.000000 | 5.01394e-13 | 1.000000 |
| rad43                         | 2.76481e-13 | 1.000000 | 2.76481e-13 | 1.000000 |
| rad54                         | 2.21364e-13 | 1.000000 | 2.21364e-13 | 1.000000 |
| rad62                         | 5.93636e-14 | 1.000000 | 5.93636e-14 | 1.000000 |
| rad50                         | 4.49943e-14 | 1.000000 | 4.49943e-14 | 1.000000 |
| rad70                         | 3.45812e-15 | 1.000000 | 3.45812e-15 | 1.000000 |
| rad55                         | 1.51896e-15 | 1.000000 | 1.51896e-15 | 1.000000 |
| PAH1+H                        | 6.38441e-16 | 1.000000 | 6.38441e-16 | 1.000000 |
| rad52                         | 2.88755e-16 | 1.000000 | 2.88755e-16 | 1.000000 |
| Phenyl+cycC3H4                | 1.15738e-16 | 1.000000 | 0.000000    | 1.000000 |
| rad58                         | 8.33663e-17 | 1.000000 | 8.33663e-17 | 1.000000 |
| rad51                         | 7.12774e-17 | 1.000000 | 7.12774e-17 | 1.000000 |
| rad34                         | 3.35232e-17 | 1.000000 | 3.35232e-17 | 1.000000 |
| rad42                         | 3.55448e-18 | 1.000000 | 3.55448e-18 | 1.000000 |
| rad41                         | 3.38724e-18 | 1.000000 | 3.38724e-18 | 1.000000 |
| rad65                         | 1.41378e-18 | 1.000000 | 1.41378e-18 | 1.000000 |
| Benzene+cycloprop-2-enylidene | 7.66665e-23 | 1.000000 | 7.66665e-23 | 1.000000 |
| PhcycC3H3_B+H                 | 8.31319e-25 | 1.000000 | 8.31319e-25 | 1.000000 |
| rad6                          | 6.89327e-29 | 1.000000 | 6.89327e-29 | 1.000000 |
| rad53                         | 2.53036e-29 | 1.000000 | 2.53036e-29 | 1.000000 |
| rad26                         | 8.72989e-31 | 1.000000 | 8.72989e-31 | 1.000000 |
| rad28                         | 8.49739e-31 | 1.000000 | 8.49739e-31 | 1.000000 |
| rad47                         | 1.79768e-31 | 1.000000 | 1.79768e-31 | 1.000000 |
| rad2                          | 2.64439e-32 | 1.000000 | 2.64439e-32 | 1.000000 |
| rad64                         | 8.25055e-33 | 1.000000 | 8.25055e-33 | 1.000000 |
| rad7                          | 4.97799e-33 | 1.000000 | 4.97799e-33 | 1.000000 |
| rad1                          | 1.67314e-33 | 1.000000 | 1.67314e-33 | 1.000000 |
| rad10                         | 1.35732e-33 | 1.000000 | 1.35732e-33 | 1.000000 |
| rad11                         | 1.21864e-33 | 1.000000 | 1.21864e-33 | 1.000000 |
| rad3                          | 1.72430e-34 | 1.000000 | 1.72430e-34 | 1.000000 |
| rad4                          | 8.71192e-35 | 1.000000 | 8.71192e-35 | 1.000000 |
| rad14                         | 7.46482e-35 | 1.000000 | 7.46482e-35 | 1.000000 |
| rad25                         | 3.47701e-35 | 1.000000 | 3.47701e-35 | 1.000000 |
| rad13                         | 2.75034e-35 | 1.000000 | 2.75034e-35 | 1.000000 |
| rad19anti                     | 7.57597e-36 | 1.000000 | 7.57597e-36 | 1.000000 |
| rad27                         | 7.10490e-36 | 1.000000 | 7.10490e-36 | 1.000000 |

|                               |             |          |             |          |
|-------------------------------|-------------|----------|-------------|----------|
| rad9                          | 2.76854e-36 | 1.000000 | 2.76854e-36 | 1.000000 |
| rad5                          | 1.10160e-37 | 1.000000 | 1.10160e-37 | 1.000000 |
| rad33                         | 5.19682e-38 | 1.000000 | 5.19682e-38 | 1.000000 |
| rad15                         | 1.19844e-39 | 1.000000 | 1.19844e-39 | 1.000000 |
| rad61                         | 6.80057e-40 | 1.000000 | 6.80057e-40 | 1.000000 |
| rad31                         | 4.37025e-40 | 1.000000 | 4.37025e-40 | 1.000000 |
| Benzene+cycloprop-1-enylidene | 1.10663e-41 | 1.000000 | 1.10663e-41 | 1.000000 |
| rad56                         | 4.28757e-42 | 1.000000 | 4.28757e-42 | 1.000000 |
| rad20                         | 2.13462e-42 | 1.000000 | 2.13462e-42 | 1.000000 |
| rad21                         | 1.68750e-42 | 1.000000 | 1.68750e-42 | 1.000000 |
| rad68syn                      | 3.31672e-44 | 1.000000 | 3.31672e-44 | 1.000000 |
| rad68anti                     | 2.83620e-44 | 1.000000 | 2.83620e-44 | 1.000000 |
| rad12                         | 2.80103e-44 | 1.000000 | 2.80103e-44 | 1.000000 |
| rad18                         | 2.51192e-44 | 1.000000 | 2.51192e-44 | 1.000000 |
| rad23                         | 7.32246e-45 | 1.000000 | 7.32246e-45 | 1.000000 |
| rad19syn                      | 8.61360e-46 | 1.000000 | 8.61360e-46 | 1.000000 |
| rad22                         | 2.83342e-46 | 1.000000 | 2.83342e-46 | 1.000000 |
| rad45                         | 4.62444e-47 | 1.000000 | 4.62444e-47 | 1.000000 |
| rad36                         | 2.83486e-48 | 1.000000 | 2.83486e-48 | 1.000000 |
| rad24                         | 2.78176e-48 | 1.000000 | 2.78176e-48 | 1.000000 |
| rad73                         | 2.95424e-52 | 1.000000 | 2.95424e-52 | 1.000000 |
| rad40syn                      | 5.41710e-53 | 1.000000 | 5.41710e-53 | 1.000000 |
| rad40anti                     | 4.46185e-53 | 1.000000 | 4.46185e-53 | 1.000000 |
| PAH8+H                        | 2.23571e-57 | 1.000000 | 2.23571e-57 | 1.000000 |
| rad71                         | 5.87072e-61 | 1.000000 | 5.87072e-61 | 1.000000 |
| rad8                          | 9.75567e-66 | 1.000000 | 9.75567e-66 | 1.000000 |

0.100000000E-05 Pa, 50.000000 K

| Rate constant             | True (fraction)        | Effective (fraction)   |
|---------------------------|------------------------|------------------------|
| Total                     | 1.72707e-17 (1.00 )    | 1.72707e-17 (1.00 )    |
| Formation of rad19        | 1.72707e-17 (1.00 )    | 1.72707e-17 (1.00 )    |
| H-abstraction to cyc2enyl | 5.49905e-35 (3.18e-18) | 5.49905e-35 (3.18e-18) |
| H-abstraction to cyclenyl | 4.93090e-50 (2.86e-33) | 4.93090e-50 (2.86e-33) |

| species                       | PYtrue      | Cumul    | PYeffective | Cumul    |
|-------------------------------|-------------|----------|-------------|----------|
| Indene+H                      | 0.999763    | 0.999763 | 0.999763    | 0.999763 |
| PhCHCCH2+H                    | 0.000225658 | 0.999989 | 0.000225658 | 0.999989 |
| PhCCH+CH3                     | 3.90994e-06 | 0.999993 | 3.90994e-06 | 0.999993 |
| C2H2+PhCH2                    | 2.79605e-06 | 0.999995 | 2.79605e-06 | 0.999995 |
| PhCCCH3+H                     | 2.20592e-06 | 0.999998 | 2.20592e-06 | 0.999998 |
| Ph+MeAc                       | 1.64418e-06 | 0.999999 | 1.64418e-06 | 0.999999 |
| rad67                         | 4.97514e-07 | 1.000000 | 4.97514e-07 | 1.000000 |
| rad35                         | 2.19879e-07 | 1.000000 | 2.19879e-07 | 1.000000 |
| Ph+Allene                     | 1.44942e-07 | 1.000000 | 1.44942e-07 | 1.000000 |
| PAH7+H                        | 1.90048e-08 | 1.000000 | 1.90048e-08 | 1.000000 |
| PhCH2CCH+H                    | 1.78173e-08 | 1.000000 | 1.78173e-08 | 1.000000 |
| rad39                         | 5.36056e-09 | 1.000000 | 5.36056e-09 | 1.000000 |
| rad37                         | 4.94868e-09 | 1.000000 | 4.94868e-09 | 1.000000 |
| rad30                         | 4.11419e-09 | 1.000000 | 4.11419e-09 | 1.000000 |
| PAH9+H                        | 2.71352e-10 | 1.000000 | 2.71352e-10 | 1.000000 |
| rad38                         | 1.14954e-10 | 1.000000 | 1.14954e-10 | 1.000000 |
| rad60syn                      | 1.81880e-11 | 1.000000 | 1.81880e-11 | 1.000000 |
| rad60anti                     | 8.89466e-12 | 1.000000 | 8.89466e-12 | 1.000000 |
| PAH3+H                        | 7.40206e-12 | 1.000000 | 7.40206e-12 | 1.000000 |
| rad46                         | 6.94584e-12 | 1.000000 | 6.94584e-12 | 1.000000 |
| PAH10+CH3                     | 6.33665e-12 | 1.000000 | 6.33665e-12 | 1.000000 |
| rad59                         | 1.53025e-12 | 1.000000 | 1.53025e-12 | 1.000000 |
| PhcycC3H3_A+H                 | 5.85937e-13 | 1.000000 | 5.85937e-13 | 1.000000 |
| rad43                         | 2.92252e-13 | 1.000000 | 2.92252e-13 | 1.000000 |
| rad54                         | 2.35373e-13 | 1.000000 | 2.35373e-13 | 1.000000 |
| rad62                         | 6.28790e-14 | 1.000000 | 6.28790e-14 | 1.000000 |
| rad50                         | 4.73674e-14 | 1.000000 | 4.73674e-14 | 1.000000 |
| rad70                         | 3.74676e-15 | 1.000000 | 3.74676e-15 | 1.000000 |
| rad55                         | 1.64775e-15 | 1.000000 | 1.64775e-15 | 1.000000 |
| PAH1+H                        | 7.14027e-16 | 1.000000 | 7.14027e-16 | 1.000000 |
| rad52                         | 3.07655e-16 | 1.000000 | 3.07655e-16 | 1.000000 |
| Phenyl+cycC3H4                | 2.36668e-16 | 1.000000 | 0.000000    | 1.000000 |
| rad58                         | 9.10706e-17 | 1.000000 | 9.10706e-17 | 1.000000 |
| rad51                         | 7.70606e-17 | 1.000000 | 7.70606e-17 | 1.000000 |
| rad34                         | 3.76206e-17 | 1.000000 | 3.76206e-17 | 1.000000 |
| rad42                         | 4.07396e-18 | 1.000000 | 4.07396e-18 | 1.000000 |
| rad41                         | 4.02391e-18 | 1.000000 | 4.02391e-18 | 1.000000 |
| Benzene+cycloprop-2-enylidene | 3.18404e-18 | 1.000000 | 3.18404e-18 | 1.000000 |
| rad65                         | 1.53994e-18 | 1.000000 | 1.53994e-18 | 1.000000 |
| PhcycC3H3_B+H                 | 2.98283e-22 | 1.000000 | 2.98283e-22 | 1.000000 |
| rad53                         | 8.14123e-27 | 1.000000 | 8.14123e-27 | 1.000000 |
| rad6                          | 3.08424e-29 | 1.000000 | 3.08424e-29 | 1.000000 |



|                               |             |         |             |         |
|-------------------------------|-------------|---------|-------------|---------|
| rad64                         | 5.79906e-30 | 1.00000 | 5.79906e-30 | 1.00000 |
| rad26                         | 5.39381e-31 | 1.00000 | 5.39381e-31 | 1.00000 |
| rad28                         | 4.72845e-31 | 1.00000 | 4.72845e-31 | 1.00000 |
| rad47                         | 1.37437e-31 | 1.00000 | 1.37437e-31 | 1.00000 |
| rad2                          | 1.22892e-32 | 1.00000 | 1.22892e-32 | 1.00000 |
| Benzene+cycloprop-1-enylidene | 2.85507e-33 | 1.00000 | 2.85507e-33 | 1.00000 |
| rad7                          | 2.22924e-33 | 1.00000 | 2.22924e-33 | 1.00000 |
| rad1                          | 7.78810e-34 | 1.00000 | 7.78810e-34 | 1.00000 |
| rad10                         | 6.31887e-34 | 1.00000 | 6.31887e-34 | 1.00000 |
| rad11                         | 5.45834e-34 | 1.00000 | 5.45834e-34 | 1.00000 |
| rad3                          | 8.06926e-35 | 1.00000 | 8.06926e-35 | 1.00000 |
| rad14                         | 5.62483e-35 | 1.00000 | 5.62483e-35 | 1.00000 |
| rad4                          | 4.07833e-35 | 1.00000 | 4.07833e-35 | 1.00000 |
| rad25                         | 2.64733e-35 | 1.00000 | 2.64733e-35 | 1.00000 |
| rad13                         | 1.23231e-35 | 1.00000 | 1.23231e-35 | 1.00000 |
| rad19anti                     | 7.56649e-36 | 1.00000 | 7.56649e-36 | 1.00000 |
| rad27                         | 5.41841e-36 | 1.00000 | 5.41841e-36 | 1.00000 |
| rad9                          | 1.62006e-36 | 1.00000 | 1.62006e-36 | 1.00000 |
| rad5                          | 6.96041e-38 | 1.00000 | 6.96041e-38 | 1.00000 |
| rad33                         | 2.33971e-38 | 1.00000 | 2.33971e-38 | 1.00000 |
| rad61                         | 1.95110e-39 | 1.00000 | 1.95110e-39 | 1.00000 |
| rad15                         | 7.01968e-40 | 1.00000 | 7.01968e-40 | 1.00000 |
| rad31                         | 4.11062e-40 | 1.00000 | 4.11062e-40 | 1.00000 |
| rad56                         | 1.18501e-41 | 1.00000 | 1.18501e-41 | 1.00000 |
| rad20                         | 1.68794e-42 | 1.00000 | 1.68794e-42 | 1.00000 |
| rad21                         | 1.34122e-42 | 1.00000 | 1.34122e-42 | 1.00000 |
| rad68syn                      | 9.39672e-44 | 1.00000 | 9.39672e-44 | 1.00000 |
| rad68anti                     | 8.02895e-44 | 1.00000 | 8.02895e-44 | 1.00000 |
| rad12                         | 2.09722e-44 | 1.00000 | 2.09722e-44 | 1.00000 |
| rad18                         | 1.95162e-44 | 1.00000 | 1.95162e-44 | 1.00000 |
| rad23                         | 3.95125e-45 | 1.00000 | 3.95125e-45 | 1.00000 |
| rad19syn                      | 1.15714e-45 | 1.00000 | 1.15714e-45 | 1.00000 |
| rad22                         | 1.73640e-46 | 1.00000 | 1.73640e-46 | 1.00000 |
| rad45                         | 2.49837e-47 | 1.00000 | 2.49837e-47 | 1.00000 |
| rad24                         | 2.40271e-48 | 1.00000 | 2.40271e-48 | 1.00000 |
| rad36                         | 1.53091e-48 | 1.00000 | 1.53091e-48 | 1.00000 |
| rad73                         | 9.15286e-52 | 1.00000 | 9.15286e-52 | 1.00000 |
| rad40syn                      | 2.11572e-52 | 1.00000 | 2.11572e-52 | 1.00000 |
| rad40anti                     | 1.74112e-52 | 1.00000 | 1.74112e-52 | 1.00000 |
| PAH8+H                        | 9.50869e-57 | 1.00000 | 9.50869e-57 | 1.00000 |
| rad71                         | 2.15906e-60 | 1.00000 | 2.15906e-60 | 1.00000 |
| rad8                          | 9.04688e-66 | 1.00000 | 9.04688e-66 | 1.00000 |

0.100000000E-05 Pa, 60.0000000 K

=====

| Rate constant             | True (fraction)        | Effective (fraction)   |
|---------------------------|------------------------|------------------------|
| Total                     | 6.93738e-17 (1.00 )    | 6.93738e-17 (1.00 )    |
| Formation of rad19        | 6.93738e-17 (1.000 )   | 6.93738e-17 (1.000 )   |
| H-abstraction to cyc2enyl | 2.50609e-31 (3.61e-15) | 2.50609e-31 (3.61e-15) |
| H-abstraction to cyclenyl | 7.62015e-44 (1.10e-27) | 7.62015e-44 (1.10e-27) |

| species       | PYtrue      | Cumul    | PYeffective | Cumul    |
|---------------|-------------|----------|-------------|----------|
| Indene+H      | 0.999758    | 0.999758 | 0.999758    | 0.999758 |
| PhCHCCH2+H    | 0.000230121 | 0.999988 | 0.000230121 | 0.999988 |
| PhCCH+CH3     | 3.99427e-06 | 0.999992 | 3.99427e-06 | 0.999992 |
| C2H2+PhCH2    | 2.86797e-06 | 0.999995 | 2.86797e-06 | 0.999995 |
| PhCCCH3+H     | 2.25806e-06 | 0.999997 | 2.25806e-06 | 0.999997 |
| Ph+MeAc       | 1.69157e-06 | 0.999999 | 1.69157e-06 | 0.999999 |
| rad67         | 5.11098e-07 | 0.999999 | 5.11098e-07 | 0.999999 |
| rad35         | 2.25634e-07 | 1.000000 | 2.25634e-07 | 1.000000 |
| Ph+Allene     | 1.50530e-07 | 1.000000 | 1.50530e-07 | 1.000000 |
| PAH7+H        | 1.96327e-08 | 1.000000 | 1.96327e-08 | 1.000000 |
| PhCH2CCH+H    | 1.86153e-08 | 1.000000 | 1.86153e-08 | 1.000000 |
| rad39         | 5.53819e-09 | 1.000000 | 5.53819e-09 | 1.000000 |
| rad37         | 5.12226e-09 | 1.000000 | 5.12226e-09 | 1.000000 |
| rad30         | 4.22418e-09 | 1.000000 | 4.22418e-09 | 1.000000 |
| PAH9+H        | 2.80739e-10 | 1.000000 | 2.80739e-10 | 1.000000 |
| rad38         | 1.19306e-10 | 1.000000 | 1.19306e-10 | 1.000000 |
| rad60syn      | 1.88685e-11 | 1.000000 | 1.88685e-11 | 1.000000 |
| rad60anti     | 9.23591e-12 | 1.000000 | 9.23591e-12 | 1.000000 |
| PAH3+H        | 7.77808e-12 | 1.000000 | 7.77808e-12 | 1.000000 |
| rad46         | 7.22907e-12 | 1.000000 | 7.22907e-12 | 1.000000 |
| PAH10+CH3     | 6.79612e-12 | 1.000000 | 6.79612e-12 | 1.000000 |
| rad59         | 1.60493e-12 | 1.000000 | 1.60493e-12 | 1.000000 |
| PhcycC3H3_A+H | 6.95715e-13 | 1.000000 | 6.95715e-13 | 1.000000 |
| rad43         | 3.11028e-13 | 1.000000 | 3.11028e-13 | 1.000000 |
| rad54         | 2.52186e-13 | 1.000000 | 2.52186e-13 | 1.000000 |
| rad62         | 6.70704e-14 | 1.000000 | 6.70704e-14 | 1.000000 |

|                               |             |          |             |          |
|-------------------------------|-------------|----------|-------------|----------|
| rad50                         | 5.01887e-14 | 1.000000 | 5.01887e-14 | 1.000000 |
| rad70                         | 4.10054e-15 | 1.000000 | 4.10054e-15 | 1.000000 |
| Benzene+cycloprop-2-enylidene | 3.61245e-15 | 1.000000 | 3.61245e-15 | 1.000000 |
| rad55                         | 1.80524e-15 | 1.000000 | 1.80524e-15 | 1.000000 |
| PAH1+H                        | 8.09569e-16 | 1.000000 | 8.09569e-16 | 1.000000 |
| Phenyl+cycC3H4                | 4.45921e-16 | 1.000000 | 0.000000    | 1.000000 |
| rad52                         | 3.30433e-16 | 1.000000 | 3.30433e-16 | 1.000000 |
| rad58                         | 1.00588e-16 | 1.000000 | 1.00588e-16 | 1.000000 |
| rad51                         | 8.41469e-17 | 1.000000 | 8.41469e-17 | 1.000000 |
| rad34                         | 4.27628e-17 | 1.000000 | 4.27628e-17 | 1.000000 |
| rad41                         | 4.87030e-18 | 1.000000 | 4.87030e-18 | 1.000000 |
| rad42                         | 4.76393e-18 | 1.000000 | 4.76393e-18 | 1.000000 |
| rad65                         | 1.69576e-18 | 1.000000 | 1.69576e-18 | 1.000000 |
| PhcycC3H3_B+H                 | 1.47017e-20 | 1.000000 | 1.47017e-20 | 1.000000 |
| rad53                         | 3.73130e-25 | 1.000000 | 3.73130e-25 | 1.000000 |
| Benzene+cycloprop-1-enylidene | 1.09842e-27 | 1.000000 | 1.09842e-27 | 1.000000 |
| rad64                         | 9.21681e-28 | 1.000000 | 9.21681e-28 | 1.000000 |
| rad6                          | 1.67966e-29 | 1.000000 | 1.67966e-29 | 1.000000 |
| rad26                         | 3.74656e-31 | 1.000000 | 3.74656e-31 | 1.000000 |
| rad28                         | 3.03705e-31 | 1.000000 | 3.03705e-31 | 1.000000 |
| rad47                         | 1.12621e-31 | 1.000000 | 1.12621e-31 | 1.000000 |
| rad2                          | 7.08335e-33 | 1.000000 | 7.08335e-33 | 1.000000 |
| rad7                          | 1.21535e-33 | 1.000000 | 1.21535e-33 | 1.000000 |
| rad1                          | 4.49800e-34 | 1.000000 | 4.49800e-34 | 1.000000 |
| rad10                         | 3.64846e-34 | 1.000000 | 3.64846e-34 | 1.000000 |
| rad11                         | 2.97658e-34 | 1.000000 | 2.97658e-34 | 1.000000 |
| rad61                         | 4.85071e-35 | 1.000000 | 4.85071e-35 | 1.000000 |
| rad3                          | 4.70089e-35 | 1.000000 | 4.70089e-35 | 1.000000 |
| rad14                         | 4.55956e-35 | 1.000000 | 4.55956e-35 | 1.000000 |
| rad4                          | 2.37694e-35 | 1.000000 | 2.37694e-35 | 1.000000 |
| rad25                         | 2.17200e-35 | 1.000000 | 2.17200e-35 | 1.000000 |
| rad19anti                     | 8.79995e-36 | 1.000000 | 8.79995e-36 | 1.000000 |
| rad13                         | 6.72262e-36 | 1.000000 | 6.72262e-36 | 1.000000 |
| rad27                         | 4.46004e-36 | 1.000000 | 4.46004e-36 | 1.000000 |
| rad9                          | 1.15307e-36 | 1.000000 | 1.15307e-36 | 1.000000 |
| rad5                          | 4.93404e-38 | 1.000000 | 4.93404e-38 | 1.000000 |
| rad33                         | 1.28455e-38 | 1.000000 | 1.28455e-38 | 1.000000 |
| rad15                         | 5.00180e-40 | 1.000000 | 5.00180e-40 | 1.000000 |
| rad31                         | 4.42100e-40 | 1.000000 | 4.42100e-40 | 1.000000 |
| rad56                         | 6.11515e-41 | 1.000000 | 6.11515e-41 | 1.000000 |
| rad20                         | 1.47836e-42 | 1.000000 | 1.47836e-42 | 1.000000 |
| rad21                         | 1.18059e-42 | 1.000000 | 1.18059e-42 | 1.000000 |
| rad68syn                      | 4.98107e-43 | 1.000000 | 4.98107e-43 | 1.000000 |
| rad68anti                     | 4.25212e-43 | 1.000000 | 4.25212e-43 | 1.000000 |
| rad12                         | 1.87049e-44 | 1.000000 | 1.87049e-44 | 1.000000 |
| rad18                         | 1.65074e-44 | 1.000000 | 1.65074e-44 | 1.000000 |
| rad23                         | 2.70119e-45 | 1.000000 | 2.70119e-45 | 1.000000 |
| rad19syn                      | 1.80508e-45 | 1.000000 | 1.80508e-45 | 1.000000 |
| rad22                         | 1.26162e-46 | 1.000000 | 1.26162e-46 | 1.000000 |
| rad45                         | 1.71566e-47 | 1.000000 | 1.71566e-47 | 1.000000 |
| rad24                         | 2.29926e-48 | 1.000000 | 2.29926e-48 | 1.000000 |
| rad36                         | 1.05087e-48 | 1.000000 | 1.05087e-48 | 1.000000 |
| rad73                         | 5.37842e-51 | 1.000000 | 5.37842e-51 | 1.000000 |
| rad40syn                      | 1.54572e-51 | 1.000000 | 1.54572e-51 | 1.000000 |
| rad40anti                     | 1.27007e-51 | 1.000000 | 1.27007e-51 | 1.000000 |
| PAH8+H                        | 7.80381e-56 | 1.000000 | 7.80381e-56 | 1.000000 |
| rad71                         | 1.56446e-59 | 1.000000 | 1.56446e-59 | 1.000000 |
| rad8                          | 9.43552e-66 | 1.000000 | 9.43552e-66 | 1.000000 |

0.100000000E-05 Pa, 70.0000000 K

=====

| Rate constant             | True (fraction)        | Effective (fraction)   |
|---------------------------|------------------------|------------------------|
| Total                     | 1.91520e-16 (1.00 )    | 1.91520e-16 (1.00 )    |
| Formation of rad19        | 1.91520e-16 (1.000 )   | 1.91520e-16 (1.000 )   |
| H-abstraction to cyc2enyl | 1.01125e-28 (5.28e-13) | 1.01125e-28 (5.28e-13) |
| H-abstraction to cyclenyl | 1.97822e-39 (1.03e-23) | 1.97822e-39 (1.03e-23) |

| species    | PYtrue      | Cumul    | PYeffective | Cumul    |
|------------|-------------|----------|-------------|----------|
| Indene+H   | 0.999753    | 0.999753 | 0.999753    | 0.999753 |
| PhCHCCH2+H | 0.000235006 | 0.999988 | 0.000235006 | 0.999988 |
| PhCCH+CH3  | 4.08659e-06 | 0.999992 | 4.08659e-06 | 0.999992 |
| C2H2+PhCH2 | 2.94722e-06 | 0.999995 | 2.94722e-06 | 0.999995 |
| PhCCCH3+H  | 2.31532e-06 | 0.999997 | 2.31532e-06 | 0.999997 |
| Ph+MeAc    | 1.74394e-06 | 0.999999 | 1.74394e-06 | 0.999999 |
| rad67      | 5.26090e-07 | 1.000000 | 5.26090e-07 | 1.000000 |
| rad35      | 2.31978e-07 | 1.000000 | 2.31978e-07 | 1.000000 |
| Ph+Allene  | 1.56781e-07 | 1.000000 | 1.56781e-07 | 1.000000 |
| PAH7+H     | 2.03305e-08 | 1.000000 | 2.03305e-08 | 1.000000 |

|                               |             |         |             |         |
|-------------------------------|-------------|---------|-------------|---------|
| PhCH2CCH+H                    | 1.95142e-08 | 1.00000 | 1.95142e-08 | 1.00000 |
| rad39                         | 5.73559e-09 | 1.00000 | 5.73559e-09 | 1.00000 |
| rad37                         | 5.31557e-09 | 1.00000 | 5.31557e-09 | 1.00000 |
| rad30                         | 4.34562e-09 | 1.00000 | 4.34562e-09 | 1.00000 |
| PAH9+H                        | 2.91202e-10 | 1.00000 | 2.91202e-10 | 1.00000 |
| rad38                         | 1.24178e-10 | 1.00000 | 1.24178e-10 | 1.00000 |
| rad60syn                      | 1.96290e-11 | 1.00000 | 1.96290e-11 | 1.00000 |
| rad60anti                     | 9.61777e-12 | 1.00000 | 9.61777e-12 | 1.00000 |
| PAH3+H                        | 8.20481e-12 | 1.00000 | 8.20481e-12 | 1.00000 |
| rad46                         | 7.54708e-12 | 1.00000 | 7.54708e-12 | 1.00000 |
| PAH10+CH3                     | 7.32916e-12 | 1.00000 | 7.32916e-12 | 1.00000 |
| rad59                         | 1.68948e-12 | 1.00000 | 1.68948e-12 | 1.00000 |
| PhcycC3H3_A+H                 | 8.34926e-13 | 1.00000 | 8.34926e-13 | 1.00000 |
| Benzene+cycloprop-2-enylidene | 5.28015e-13 | 1.00000 | 5.28015e-13 | 1.00000 |
| rad43                         | 3.32593e-13 | 1.00000 | 3.32593e-13 | 1.00000 |
| rad54                         | 2.71678e-13 | 1.00000 | 2.71678e-13 | 1.00000 |
| rad62                         | 7.18916e-14 | 1.00000 | 7.18916e-14 | 1.00000 |
| rad50                         | 5.34248e-14 | 1.00000 | 5.34248e-14 | 1.00000 |
| rad70                         | 4.52036e-15 | 1.00000 | 4.52036e-15 | 1.00000 |
| rad55                         | 1.99186e-15 | 1.00000 | 1.99186e-15 | 1.00000 |
| PAH1+H                        | 9.26901e-16 | 1.00000 | 9.26901e-16 | 1.00000 |
| Phenyl+cycC3H4                | 7.87809e-16 | 1.00000 | 0.00000     | 1.00000 |
| rad52                         | 3.56973e-16 | 1.00000 | 3.56973e-16 | 1.00000 |
| rad58                         | 1.11992e-16 | 1.00000 | 1.11992e-16 | 1.00000 |
| rad51                         | 9.25594e-17 | 1.00000 | 9.25594e-17 | 1.00000 |
| rad34                         | 4.90705e-17 | 1.00000 | 4.90705e-17 | 1.00000 |
| rad41                         | 5.95426e-18 | 1.00000 | 5.95426e-18 | 1.00000 |
| rad42                         | 5.64287e-18 | 1.00000 | 5.64287e-18 | 1.00000 |
| rad65                         | 1.88240e-18 | 1.00000 | 1.88240e-18 | 1.00000 |
| PhcycC3H3_B+H                 | 2.38334e-19 | 1.00000 | 2.38334e-19 | 1.00000 |
| Benzene+cycloprop-1-enylidene | 1.03290e-23 | 1.00000 | 1.03290e-23 | 1.00000 |
| rad53                         | 5.56946e-24 | 1.00000 | 5.56946e-24 | 1.00000 |
| rad64                         | 3.39558e-26 | 1.00000 | 3.39558e-26 | 1.00000 |
| rad6                          | 1.03411e-29 | 1.00000 | 1.03411e-29 | 1.00000 |
| rad26                         | 2.80006e-31 | 1.00000 | 2.80006e-31 | 1.00000 |
| rad28                         | 2.13117e-31 | 1.00000 | 2.13117e-31 | 1.00000 |
| rad47                         | 9.65476e-32 | 1.00000 | 9.65476e-32 | 1.00000 |
| rad61                         | 5.68424e-32 | 1.00000 | 5.68424e-32 | 1.00000 |
| rad2                          | 4.73453e-33 | 1.00000 | 4.73453e-33 | 1.00000 |
| rad7                          | 7.49182e-34 | 1.00000 | 7.49182e-34 | 1.00000 |
| rad1                          | 3.01352e-34 | 1.00000 | 3.01352e-34 | 1.00000 |
| rad10                         | 2.43782e-34 | 1.00000 | 2.43782e-34 | 1.00000 |
| rad11                         | 1.83543e-34 | 1.00000 | 1.83543e-34 | 1.00000 |
| rad14                         | 3.87967e-35 | 1.00000 | 3.87967e-35 | 1.00000 |
| rad3                          | 3.18724e-35 | 1.00000 | 3.18724e-35 | 1.00000 |
| rad56                         | 2.32710e-35 | 1.00000 | 2.32710e-35 | 1.00000 |
| rad25                         | 1.87259e-35 | 1.00000 | 1.87259e-35 | 1.00000 |
| rad4                          | 1.61243e-35 | 1.00000 | 1.61243e-35 | 1.00000 |
| rad19anti                     | 1.14994e-35 | 1.00000 | 1.14994e-35 | 1.00000 |
| rad13                         | 4.14701e-36 | 1.00000 | 4.14701e-36 | 1.00000 |
| rad27                         | 3.86227e-36 | 1.00000 | 3.86227e-36 | 1.00000 |
| rad9                          | 9.32227e-37 | 1.00000 | 9.32227e-37 | 1.00000 |
| rad5                          | 3.75989e-38 | 1.00000 | 3.75989e-38 | 1.00000 |
| rad33                         | 7.98947e-39 | 1.00000 | 7.98947e-39 | 1.00000 |
| rad31                         | 5.25795e-40 | 1.00000 | 5.25795e-40 | 1.00000 |
| rad15                         | 4.04878e-40 | 1.00000 | 4.04878e-40 | 1.00000 |
| rad68syn                      | 8.35696e-42 | 1.00000 | 8.35696e-42 | 1.00000 |
| rad68anti                     | 7.12853e-42 | 1.00000 | 7.12853e-42 | 1.00000 |
| rad20                         | 1.38298e-42 | 1.00000 | 1.38298e-42 | 1.00000 |
| rad21                         | 1.11022e-42 | 1.00000 | 1.11022e-42 | 1.00000 |
| rad12                         | 1.86637e-44 | 1.00000 | 1.86637e-44 | 1.00000 |
| rad18                         | 1.47615e-44 | 1.00000 | 1.47615e-44 | 1.00000 |
| rad19syn                      | 3.07655e-45 | 1.00000 | 3.07655e-45 | 1.00000 |
| rad23                         | 2.17843e-45 | 1.00000 | 2.17843e-45 | 1.00000 |
| rad22                         | 1.00896e-46 | 1.00000 | 1.00896e-46 | 1.00000 |
| rad45                         | 1.39362e-47 | 1.00000 | 1.39362e-47 | 1.00000 |
| rad24                         | 2.36186e-48 | 1.00000 | 2.36186e-48 | 1.00000 |
| rad36                         | 8.53350e-49 | 1.00000 | 8.53350e-49 | 1.00000 |
| rad73                         | 9.69711e-50 | 1.00000 | 9.69711e-50 | 1.00000 |
| rad40syn                      | 2.86238e-50 | 1.00000 | 2.86238e-50 | 1.00000 |
| rad40anti                     | 2.34563e-50 | 1.00000 | 2.34563e-50 | 1.00000 |
| PAH8+H                        | 1.67105e-54 | 1.00000 | 1.67105e-54 | 1.00000 |
| rad71                         | 3.35679e-58 | 1.00000 | 3.35679e-58 | 1.00000 |
| rad8                          | 1.06794e-65 | 1.00000 | 1.06794e-65 | 1.00000 |

0.100000000E-05 Pa, 80.0000000 K

| Rate constant | True (fraction)    | Effective (fraction) |
|---------------|--------------------|----------------------|
| Total         | 4.17084e-16 (1.00) | 4.17084e-16 (1.00)   |

Formation of rad19 | 4.17084e-16 (1.000 ) 4.17084e-16 (1.000 )  
H-abstraction to cyc2enyl | 8.98751e-27 (2.15e-11) 8.98751e-27 (2.15e-11)  
H-abstraction to cyc1enyl | 4.00120e-36 (9.59e-21) 4.00120e-36 (9.59e-21)

| species                       | PYtrue      | Cumul    | PYeffective | Cumul    |
|-------------------------------|-------------|----------|-------------|----------|
| Indene+H                      | 0.999747    | 0.999747 | 0.999747    | 0.999747 |
| PhCHCCH2+H                    | 0.000240278 | 0.999987 | 0.000240278 | 0.999987 |
| PhCCH+CH3                     | 4.18618e-06 | 0.999991 | 4.18618e-06 | 0.999991 |
| C2H2+PhCH2                    | 3.03335e-06 | 0.999994 | 3.03335e-06 | 0.999994 |
| PhCCCH3+H                     | 2.37733e-06 | 0.999997 | 2.37733e-06 | 0.999997 |
| Ph+MeAc                       | 1.80101e-06 | 0.999999 | 1.80101e-06 | 0.999999 |
| rad67                         | 5.42408e-07 | 0.999999 | 5.42408e-07 | 0.999999 |
| rad35                         | 2.38874e-07 | 0.999999 | 2.38874e-07 | 0.999999 |
| Ph+Allene                     | 1.63685e-07 | 1.000000 | 1.63685e-07 | 1.000000 |
| PAH7+H                        | 2.10959e-08 | 1.000000 | 2.10959e-08 | 1.000000 |
| PhCH2CCH+H                    | 2.05146e-08 | 1.000000 | 2.05146e-08 | 1.000000 |
| rad39                         | 5.95207e-09 | 1.000000 | 5.95207e-09 | 1.000000 |
| rad37                         | 5.52806e-09 | 1.000000 | 5.52806e-09 | 1.000000 |
| rad30                         | 4.47786e-09 | 1.000000 | 4.47786e-09 | 1.000000 |
| PAH9+H                        | 3.02715e-10 | 1.000000 | 3.02715e-10 | 1.000000 |
| rad38                         | 1.29567e-10 | 1.000000 | 1.29567e-10 | 1.000000 |
| Benzene+cycloprop-2-enylidene | 2.15484e-11 | 1.000000 | 2.15484e-11 | 1.000000 |
| rad60syn                      | 2.04685e-11 | 1.000000 | 2.04685e-11 | 1.000000 |
| rad60anti                     | 1.00397e-11 | 1.000000 | 1.00397e-11 | 1.000000 |
| PAH3+H                        | 8.68358e-12 | 1.000000 | 8.68358e-12 | 1.000000 |
| PAH10+CH3                     | 7.94154e-12 | 1.000000 | 7.94154e-12 | 1.000000 |
| rad46                         | 7.89977e-12 | 1.000000 | 7.89977e-12 | 1.000000 |
| rad59                         | 1.78410e-12 | 1.000000 | 1.78410e-12 | 1.000000 |
| PhcycC3H3_A+H                 | 1.01061e-12 | 1.000000 | 1.01061e-12 | 1.000000 |
| rad43                         | 3.57097e-13 | 1.000000 | 3.57097e-13 | 1.000000 |
| rad54                         | 2.94055e-13 | 1.000000 | 2.94055e-13 | 1.000000 |
| rad62                         | 7.73784e-14 | 1.000000 | 7.73784e-14 | 1.000000 |
| rad50                         | 5.70980e-14 | 1.000000 | 5.70980e-14 | 1.000000 |
| rad70                         | 5.01448e-15 | 1.000000 | 5.01448e-15 | 1.000000 |
| rad55                         | 2.21137e-15 | 1.000000 | 2.21137e-15 | 1.000000 |
| Phenyl+cycC3H4                | 1.32430e-15 | 1.000000 | 0.000000    | 1.000000 |
| PAH1+H                        | 1.07021e-15 | 1.000000 | 1.07021e-15 | 1.000000 |
| rad52                         | 3.87616e-16 | 1.000000 | 3.87616e-16 | 1.000000 |
| rad58                         | 1.25561e-16 | 1.000000 | 1.25561e-16 | 1.000000 |
| rad51                         | 1.02472e-16 | 1.000000 | 1.02472e-16 | 1.000000 |
| rad34                         | 5.67859e-17 | 1.000000 | 5.67859e-17 | 1.000000 |
| rad41                         | 7.33020e-18 | 1.000000 | 7.33020e-18 | 1.000000 |
| rad42                         | 6.74821e-18 | 1.000000 | 6.74821e-18 | 1.000000 |
| rad65                         | 2.10441e-18 | 1.000000 | 2.10441e-18 | 1.000000 |
| PhcycC3H3_B+H                 | 1.96138e-18 | 1.000000 | 1.96138e-18 | 1.000000 |
| Benzene+cycloprop-1-enylidene | 9.59328e-21 | 1.000000 | 9.59328e-21 | 1.000000 |
| rad53                         | 4.18956e-23 | 1.000000 | 4.18956e-23 | 1.000000 |
| rad64                         | 5.09108e-25 | 1.000000 | 5.09108e-25 | 1.000000 |
| rad61                         | 8.41955e-30 | 1.000000 | 8.41955e-30 | 1.000000 |
| rad6                          | 6.92380e-30 | 1.000000 | 6.92380e-30 | 1.000000 |
| rad26                         | 2.19969e-31 | 1.000000 | 2.19969e-31 | 1.000000 |
| rad28                         | 1.58754e-31 | 1.000000 | 1.58754e-31 | 1.000000 |
| rad47                         | 8.54861e-32 | 1.000000 | 8.54861e-32 | 1.000000 |
| rad56                         | 1.31867e-32 | 1.000000 | 1.31867e-32 | 1.000000 |
| rad2                          | 3.53069e-33 | 1.000000 | 3.53069e-33 | 1.000000 |
| rad7                          | 5.02288e-34 | 1.000000 | 5.02288e-34 | 1.000000 |
| rad1                          | 2.25321e-34 | 1.000000 | 2.25321e-34 | 1.000000 |
| rad68syn                      | 1.87136e-34 | 1.000000 | 1.87136e-34 | 1.000000 |
| rad10                         | 1.82313e-34 | 1.000000 | 1.82313e-34 | 1.000000 |
| rad68anti                     | 1.57601e-34 | 1.000000 | 1.57601e-34 | 1.000000 |
| rad11                         | 1.23100e-34 | 1.000000 | 1.23100e-34 | 1.000000 |
| rad14                         | 3.41735e-35 | 1.000000 | 3.41735e-35 | 1.000000 |
| rad3                          | 2.43485e-35 | 1.000000 | 2.43485e-35 | 1.000000 |
| rad25                         | 1.67256e-35 | 1.000000 | 1.67256e-35 | 1.000000 |
| rad19anti                     | 1.65192e-35 | 1.000000 | 1.65192e-35 | 1.000000 |
| rad4                          | 1.23254e-35 | 1.000000 | 1.23254e-35 | 1.000000 |
| rad27                         | 3.46824e-36 | 1.000000 | 3.46824e-36 | 1.000000 |
| rad13                         | 2.78255e-36 | 1.000000 | 2.78255e-36 | 1.000000 |
| rad9                          | 8.24991e-37 | 1.000000 | 8.24991e-37 | 1.000000 |
| rad5                          | 3.01020e-38 | 1.000000 | 3.01020e-38 | 1.000000 |
| rad33                         | 5.41701e-39 | 1.000000 | 5.41701e-39 | 1.000000 |
| rad31                         | 6.77698e-40 | 1.000000 | 6.77698e-40 | 1.000000 |
| rad15                         | 3.58771e-40 | 1.000000 | 3.58771e-40 | 1.000000 |
| rad20                         | 1.35560e-42 | 1.000000 | 1.35560e-42 | 1.000000 |
| rad21                         | 1.09432e-42 | 1.000000 | 1.09432e-42 | 1.000000 |
| rad12                         | 2.01594e-44 | 1.000000 | 2.01594e-44 | 1.000000 |
| rad18                         | 1.37310e-44 | 1.000000 | 1.37310e-44 | 1.000000 |
| rad19syn                      | 5.56519e-45 | 1.000000 | 5.56519e-45 | 1.000000 |
| rad23                         | 2.01275e-45 | 1.000000 | 2.01275e-45 | 1.000000 |

|           |             |          |             |          |
|-----------|-------------|----------|-------------|----------|
| rad22     | 8.57527e-47 | 1.000000 | 8.57527e-47 | 1.000000 |
| rad45     | 1.29921e-47 | 1.000000 | 1.29921e-47 | 1.000000 |
| rad73     | 1.03569e-47 | 1.000000 | 1.03569e-47 | 1.000000 |
| rad24     | 2.55723e-48 | 1.000000 | 2.55723e-48 | 1.000000 |
| rad40syn  | 2.29076e-48 | 1.000000 | 2.29076e-48 | 1.000000 |
| rad40anti | 1.86932e-48 | 1.000000 | 1.86932e-48 | 1.000000 |
| rad36     | 7.95386e-49 | 1.000000 | 7.95386e-49 | 1.000000 |
| PAH8+H    | 1.56151e-52 | 1.000000 | 1.56151e-52 | 1.000000 |
| rad71     | 3.88541e-56 | 1.000000 | 3.88541e-56 | 1.000000 |
| rad8      | 1.28435e-65 | 1.000000 | 1.28435e-65 | 1.000000 |

0.100000000E-05 Pa, 90.0000000 K

| Rate constant             | True (fraction)        | Effective (fraction)   |
|---------------------------|------------------------|------------------------|
| Total                     | 7.74016e-16 (1.00 )    | 7.74016e-16 (1.00 )    |
| Formation of rad19        | 7.74016e-16 (1.000 )   | 7.74016e-16 (1.000 )   |
| H-abstraction to cyc2enyl | 2.91736e-25 (3.77e-10) | 2.91736e-25 (3.77e-10) |
| H-abstraction to cyclenyl | 1.47814e-33 (1.91e-18) | 1.47814e-33 (1.91e-18) |

| species                       | PYtrue      | Cumul    | PYeffective | Cumul    |
|-------------------------------|-------------|----------|-------------|----------|
| Indene+H                      | 0.999741    | 0.999741 | 0.999741    | 0.999741 |
| PhCHCCH2+H                    | 0.000245933 | 0.999987 | 0.000245933 | 0.999987 |
| PhCCH+CH3                     | 4.29301e-06 | 0.999991 | 4.29301e-06 | 0.999991 |
| C2H2+PhCH3                    | 3.12644e-06 | 0.999994 | 3.12644e-06 | 0.999994 |
| PhCCCH3+H                     | 2.44411e-06 | 0.999997 | 2.44411e-06 | 0.999997 |
| Ph+MeAc                       | 1.86289e-06 | 0.999999 | 1.86289e-06 | 0.999999 |
| rad67                         | 5.60078e-07 | 0.999999 | 5.60078e-07 | 0.999999 |
| rad35                         | 2.46332e-07 | 0.999999 | 2.46332e-07 | 0.999999 |
| Ph+Allene                     | 1.71280e-07 | 1.000000 | 1.71280e-07 | 1.000000 |
| PAH7+H                        | 2.19315e-08 | 1.000000 | 2.19315e-08 | 1.000000 |
| PhCH2CCH+H                    | 2.16239e-08 | 1.000000 | 2.16239e-08 | 1.000000 |
| rad39                         | 6.18833e-09 | 1.000000 | 6.18833e-09 | 1.000000 |
| rad37                         | 5.76057e-09 | 1.000000 | 5.76057e-09 | 1.000000 |
| rad30                         | 4.62113e-09 | 1.000000 | 4.62113e-09 | 1.000000 |
| Benzene+cycloprop-2-enylidene | 3.76912e-10 | 1.000000 | 3.76912e-10 | 1.000000 |
| PAH9+H                        | 3.15328e-10 | 1.000000 | 3.15328e-10 | 1.000000 |
| rad38                         | 1.35501e-10 | 1.000000 | 1.35501e-10 | 1.000000 |
| rad60syn                      | 2.13909e-11 | 1.000000 | 2.13909e-11 | 1.000000 |
| rad60anti                     | 1.05039e-11 | 1.000000 | 1.05039e-11 | 1.000000 |
| PAH3+H                        | 9.21901e-12 | 1.000000 | 9.21901e-12 | 1.000000 |
| PAH10+CH3                     | 8.64384e-12 | 1.000000 | 8.64384e-12 | 1.000000 |
| rad46                         | 8.28938e-12 | 1.000000 | 8.28938e-12 | 1.000000 |
| rad59                         | 1.88961e-12 | 1.000000 | 1.88961e-12 | 1.000000 |
| PhcycC3H3_A+H                 | 1.23243e-12 | 1.000000 | 1.23243e-12 | 1.000000 |
| rad43                         | 3.84868e-13 | 1.000000 | 3.84868e-13 | 1.000000 |
| rad54                         | 3.19699e-13 | 1.000000 | 3.19699e-13 | 1.000000 |
| rad62                         | 8.36058e-14 | 1.000000 | 8.36058e-14 | 1.000000 |
| rad50                         | 6.12577e-14 | 1.000000 | 6.12577e-14 | 1.000000 |
| rad70                         | 5.59583e-15 | 1.000000 | 5.59583e-15 | 1.000000 |
| rad55                         | 2.46956e-15 | 1.000000 | 2.46956e-15 | 1.000000 |
| Phenyl+cycC3H4                | 2.14284e-15 | 1.000000 | 0.000000    | 1.000000 |
| PAH1+H                        | 1.24557e-15 | 1.000000 | 1.24557e-15 | 1.000000 |
| rad52                         | 4.22957e-16 | 1.000000 | 4.22957e-16 | 1.000000 |
| rad58                         | 1.41714e-16 | 1.000000 | 1.41714e-16 | 1.000000 |
| rad51                         | 1.14155e-16 | 1.000000 | 1.14155e-16 | 1.000000 |
| rad34                         | 6.62495e-17 | 1.000000 | 6.62495e-17 | 1.000000 |
| PhcycC3H3_B+H                 | 1.04002e-17 | 1.000000 | 1.04002e-17 | 1.000000 |
| rad41                         | 9.07988e-18 | 1.000000 | 9.07988e-18 | 1.000000 |
| rad42                         | 8.13587e-18 | 1.000000 | 8.13587e-18 | 1.000000 |
| rad65                         | 2.36870e-18 | 1.000000 | 2.36870e-18 | 1.000000 |
| Benzene+cycloprop-1-enylidene | 1.90970e-18 | 1.000000 | 1.90970e-18 | 1.000000 |
| rad53                         | 2.02296e-22 | 1.000000 | 2.02296e-22 | 1.000000 |
| rad64                         | 4.24438e-24 | 1.000000 | 4.24438e-24 | 1.000000 |
| rad61                         | 4.05748e-28 | 1.000000 | 4.05748e-28 | 1.000000 |
| rad6                          | 4.92846e-30 | 1.000000 | 4.92846e-30 | 1.000000 |
| rad56                         | 1.28601e-30 | 1.000000 | 1.28601e-30 | 1.000000 |
| rad26                         | 1.79144e-31 | 1.000000 | 1.79144e-31 | 1.000000 |
| rad28                         | 1.23433e-31 | 1.000000 | 1.23433e-31 | 1.000000 |
| rad47                         | 7.75926e-32 | 1.000000 | 7.75926e-32 | 1.000000 |
| rad68syn                      | 2.85402e-32 | 1.000000 | 2.85402e-32 | 1.000000 |
| rad68anti                     | 2.36878e-32 | 1.000000 | 2.36878e-32 | 1.000000 |
| rad2                          | 2.90854e-33 | 1.000000 | 2.90854e-33 | 1.000000 |
| rad7                          | 3.58056e-34 | 1.000000 | 3.58056e-34 | 1.000000 |
| rad1                          | 1.86161e-34 | 1.000000 | 1.86161e-34 | 1.000000 |
| rad10                         | 1.50360e-34 | 1.000000 | 1.50360e-34 | 1.000000 |
| rad11                         | 8.77873e-35 | 1.000000 | 8.77873e-35 | 1.000000 |
| rad14                         | 3.08942e-35 | 1.000000 | 3.08942e-35 | 1.000000 |
| rad19anti                     | 2.57295e-35 | 1.000000 | 2.57295e-35 | 1.000000 |

|           |             |          |             |          |
|-----------|-------------|----------|-------------|----------|
| rad3      | 2.06029e-35 | 1.000000 | 2.06029e-35 | 1.000000 |
| rad25     | 1.53420e-35 | 1.000000 | 1.53420e-35 | 1.000000 |
| rad4      | 1.04366e-35 | 1.000000 | 1.04366e-35 | 1.000000 |
| rad27     | 3.20090e-36 | 1.000000 | 3.20090e-36 | 1.000000 |
| rad13     | 1.98523e-36 | 1.000000 | 1.98523e-36 | 1.000000 |
| rad9      | 7.81699e-37 | 1.000000 | 7.81699e-37 | 1.000000 |
| rad5      | 2.49758e-38 | 1.000000 | 2.49758e-38 | 1.000000 |
| rad33     | 3.91585e-39 | 1.000000 | 3.91585e-39 | 1.000000 |
| rad73     | 1.45329e-39 | 1.000000 | 1.45329e-39 | 1.000000 |
| rad31     | 9.34621e-40 | 1.000000 | 9.34621e-40 | 1.000000 |
| rad15     | 3.40409e-40 | 1.000000 | 3.40409e-40 | 1.000000 |
| rad20     | 1.37660e-42 | 1.000000 | 1.37660e-42 | 1.000000 |
| rad21     | 1.11788e-42 | 1.000000 | 1.11788e-42 | 1.000000 |
| rad12     | 2.31265e-44 | 1.000000 | 2.31265e-44 | 1.000000 |
| rad18     | 1.31551e-44 | 1.000000 | 1.31551e-44 | 1.000000 |
| rad19syn  | 1.05530e-44 | 1.000000 | 1.05530e-44 | 1.000000 |
| rad23     | 2.10395e-45 | 1.000000 | 2.10395e-45 | 1.000000 |
| rad40syn  | 5.28600e-46 | 1.000000 | 5.28600e-46 | 1.000000 |
| rad40anti | 4.29340e-46 | 1.000000 | 4.29340e-46 | 1.000000 |
| rad22     | 7.59976e-47 | 1.000000 | 7.59976e-47 | 1.000000 |
| rad45     | 1.37316e-47 | 1.000000 | 1.37316e-47 | 1.000000 |
| rad24     | 2.88573e-48 | 1.000000 | 2.88573e-48 | 1.000000 |
| rad36     | 8.40621e-49 | 1.000000 | 8.40621e-49 | 1.000000 |
| PAH8+H    | 4.16082e-50 | 1.000000 | 4.16082e-50 | 1.000000 |
| rad71     | 1.29280e-53 | 1.000000 | 1.29280e-53 | 1.000000 |
| rad8      | 1.61985e-65 | 1.000000 | 1.61985e-65 | 1.000000 |

0.100000000E-05 Pa, 100.00000 K

=====

| Rate constant             | True (fraction)        | Effective (fraction)   |
|---------------------------|------------------------|------------------------|
| Total                     | 1.28255e-15 (1.00 )    | 1.28255e-15 (1.00 )    |
| Formation of rad19        | 1.28255e-15 (1.000 )   | 1.28255e-15 (1.000 )   |
| H-abstraction to cyc2enyl | 4.68359e-24 (3.65e-09) | 4.68359e-24 (3.65e-09) |
| H-abstraction to cyc1enyl | 1.66242e-31 (1.30e-16) | 1.66242e-31 (1.30e-16) |

| species                       | PYtrue      | Cumul    | PYeffective | Cumul    |
|-------------------------------|-------------|----------|-------------|----------|
| Indene+H                      | 0.999735    | 0.999735 | 0.999735    | 0.999735 |
| PhCHCCH2+H                    | 0.000251988 | 0.999987 | 0.000251988 | 0.999987 |
| PhCCH+CH3                     | 4.40736e-06 | 0.999991 | 4.40736e-06 | 0.999991 |
| C2H2+PhCH2                    | 3.22690e-06 | 0.999995 | 3.22690e-06 | 0.999995 |
| PhCCCH3+H                     | 2.51589e-06 | 0.999997 | 2.51589e-06 | 0.999997 |
| Ph+MeAc                       | 1.92987e-06 | 0.999999 | 1.92987e-06 | 0.999999 |
| rad67                         | 5.79181e-07 | 1.000000 | 5.79181e-07 | 1.000000 |
| rad35                         | 2.54382e-07 | 1.000000 | 2.54382e-07 | 1.000000 |
| Ph+Allene                     | 1.79627e-07 | 1.000000 | 1.79627e-07 | 1.000000 |
| PhCH2CCH+H                    | 2.28536e-08 | 1.000000 | 2.28536e-08 | 1.000000 |
| PAH7+H                        | 2.28426e-08 | 1.000000 | 2.28426e-08 | 1.000000 |
| rad39                         | 6.44590e-09 | 1.000000 | 6.44590e-09 | 1.000000 |
| rad37                         | 6.01471e-09 | 1.000000 | 6.01471e-09 | 1.000000 |
| rad30                         | 4.77610e-09 | 1.000000 | 4.77610e-09 | 1.000000 |
| Benzene+cycloprop-2-enylidene | 3.65179e-09 | 1.000000 | 3.65179e-09 | 1.000000 |
| PAH9+H                        | 3.29134e-10 | 1.000000 | 3.29134e-10 | 1.000000 |
| rad38                         | 1.42033e-10 | 1.000000 | 1.42033e-10 | 1.000000 |
| rad60syn                      | 2.24039e-11 | 1.000000 | 2.24039e-11 | 1.000000 |
| rad60anti                     | 1.10144e-11 | 1.000000 | 1.10144e-11 | 1.000000 |
| PAH3+H                        | 9.81802e-12 | 1.000000 | 9.81802e-12 | 1.000000 |
| PAH10+CH3                     | 9.45058e-12 | 1.000000 | 9.45058e-12 | 1.000000 |
| rad46                         | 8.71962e-12 | 1.000000 | 8.71962e-12 | 1.000000 |
| rad59                         | 2.00730e-12 | 1.000000 | 2.00730e-12 | 1.000000 |
| PhcycC3H3_A+H                 | 1.51348e-12 | 1.000000 | 1.51348e-12 | 1.000000 |
| rad43                         | 4.16368e-13 | 1.000000 | 4.16368e-13 | 1.000000 |
| rad54                         | 3.49137e-13 | 1.000000 | 3.49137e-13 | 1.000000 |
| rad62                         | 9.06791e-14 | 1.000000 | 9.06791e-14 | 1.000000 |
| rad50                         | 6.59741e-14 | 1.000000 | 6.59741e-14 | 1.000000 |
| rad70                         | 6.28191e-15 | 1.000000 | 6.28191e-15 | 1.000000 |
| Phenyl+cycC3H4                | 3.36905e-15 | 1.000000 | 0.000000    | 1.000000 |
| rad55                         | 2.77429e-15 | 1.000000 | 2.77429e-15 | 1.000000 |
| PAH1+H                        | 1.46128e-15 | 1.000000 | 1.46128e-15 | 1.000000 |
| rad52                         | 4.63812e-16 | 1.000000 | 4.63812e-16 | 1.000000 |
| rad58                         | 1.61019e-16 | 1.000000 | 1.61019e-16 | 1.000000 |
| Benzene+cycloprop-1-enylidene | 1.29619e-16 | 1.000000 | 1.29619e-16 | 1.000000 |
| rad51                         | 1.27976e-16 | 1.000000 | 1.27976e-16 | 1.000000 |
| rad34                         | 7.79213e-17 | 1.000000 | 7.79213e-17 | 1.000000 |
| PhcycC3H3_B+H                 | 4.09123e-17 | 1.000000 | 4.09123e-17 | 1.000000 |
| rad41                         | 1.13186e-17 | 1.000000 | 1.13186e-17 | 1.000000 |
| rad42                         | 9.88346e-18 | 1.000000 | 9.88346e-18 | 1.000000 |
| rad65                         | 2.68464e-18 | 1.000000 | 2.68464e-18 | 1.000000 |
| rad53                         | 7.24662e-22 | 1.000000 | 7.24662e-22 | 1.000000 |

|           |             |         |             |         |
|-----------|-------------|---------|-------------|---------|
| rad64     | 2.36968e-23 | 1.00000 | 2.36968e-23 | 1.00000 |
| rad61     | 9.04334e-27 | 1.00000 | 9.04334e-27 | 1.00000 |
| rad56     | 5.01134e-29 | 1.00000 | 5.01134e-29 | 1.00000 |
| rad6      | 3.67769e-30 | 1.00000 | 3.67769e-30 | 1.00000 |
| rad68syn  | 1.54810e-30 | 1.00000 | 1.54810e-30 | 1.00000 |
| rad68anti | 1.27120e-30 | 1.00000 | 1.27120e-30 | 1.00000 |
| rad26     | 1.49920e-31 | 1.00000 | 1.49920e-31 | 1.00000 |
| rad28     | 9.91067e-32 | 1.00000 | 9.91067e-32 | 1.00000 |
| rad47     | 7.18612e-32 | 1.00000 | 7.18612e-32 | 1.00000 |
| rad2      | 2.63031e-33 | 1.00000 | 2.63031e-33 | 1.00000 |
| rad7      | 2.67598e-34 | 1.00000 | 2.67598e-34 | 1.00000 |
| rad1      | 1.68896e-34 | 1.00000 | 1.68896e-34 | 1.00000 |
| rad10     | 1.35866e-34 | 1.00000 | 1.35866e-34 | 1.00000 |
| rad11     | 6.56380e-35 | 1.00000 | 6.56380e-35 | 1.00000 |
| rad19anti | 4.30712e-35 | 1.00000 | 4.30712e-35 | 1.00000 |
| rad14     | 2.85053e-35 | 1.00000 | 2.85053e-35 | 1.00000 |
| rad3      | 1.92136e-35 | 1.00000 | 1.92136e-35 | 1.00000 |
| rad25     | 1.43704e-35 | 1.00000 | 1.43704e-35 | 1.00000 |
| rad4      | 9.74045e-36 | 1.00000 | 9.74045e-36 | 1.00000 |
| rad27     | 3.01870e-36 | 1.00000 | 3.01870e-36 | 1.00000 |
| rad40syn  | 1.99128e-36 | 1.00000 | 1.99128e-36 | 1.00000 |
| rad40anti | 1.51571e-36 | 1.00000 | 1.51571e-36 | 1.00000 |
| rad13     | 1.48505e-36 | 1.00000 | 1.48505e-36 | 1.00000 |
| rad9      | 7.81968e-37 | 1.00000 | 7.81968e-37 | 1.00000 |
| rad73     | 7.52968e-37 | 1.00000 | 7.52968e-37 | 1.00000 |
| rad5      | 2.12883e-38 | 1.00000 | 2.12883e-38 | 1.00000 |
| rad33     | 2.97750e-39 | 1.00000 | 2.97750e-39 | 1.00000 |
| rad31     | 1.36787e-39 | 1.00000 | 1.36787e-39 | 1.00000 |
| rad15     | 3.41009e-40 | 1.00000 | 3.41009e-40 | 1.00000 |
| rad20     | 1.43791e-42 | 1.00000 | 1.43791e-42 | 1.00000 |
| rad21     | 1.17505e-42 | 1.00000 | 1.17505e-42 | 1.00000 |
| rad12     | 2.78473e-44 | 1.00000 | 2.78473e-44 | 1.00000 |
| rad19syn  | 2.08907e-44 | 1.00000 | 2.08907e-44 | 1.00000 |
| rad18     | 1.28979e-44 | 1.00000 | 1.28979e-44 | 1.00000 |
| rad23     | 2.47153e-45 | 1.00000 | 2.47153e-45 | 1.00000 |
| rad22     | 6.94452e-47 | 1.00000 | 6.94452e-47 | 1.00000 |
| PAH8+H    | 2.22239e-47 | 1.00000 | 2.22239e-47 | 1.00000 |
| rad45     | 1.63762e-47 | 1.00000 | 1.63762e-47 | 1.00000 |
| rad24     | 3.36961e-48 | 1.00000 | 3.36961e-48 | 1.00000 |
| rad36     | 1.00264e-48 | 1.00000 | 1.00264e-48 | 1.00000 |
| rad71     | 8.99608e-51 | 1.00000 | 8.99608e-51 | 1.00000 |
| rad8      | 2.12436e-65 | 1.00000 | 2.12436e-65 | 1.00000 |

0.100000000E-05 Pa, 110.00000 K

| Rate constant             | True (fraction)        | Effective (fraction)   |
|---------------------------|------------------------|------------------------|
| Total                     | 1.95524e-15 (1.00 )    | 1.95524e-15 (1.00 )    |
| Formation of rad19        | 1.95524e-15 (1.000 )   | 1.95524e-15 (1.000 )   |
| H-abstraction to cyc2enyl | 4.50936e-23 (2.31e-08) | 4.50936e-23 (2.31e-08) |
| H-abstraction to cyclenyl | 7.87782e-30 (4.03e-15) | 7.87782e-30 (4.03e-15) |

| species                       | PYtrue      | Cumul    | PYeffective | Cumul    |
|-------------------------------|-------------|----------|-------------|----------|
| Indene+H                      | 0.999728    | 0.999728 | 0.999728    | 0.999728 |
| PhCHCCH2+H                    | 0.000258470 | 0.999986 | 0.000258470 | 0.999986 |
| PhCCH+CH3                     | 4.52973e-06 | 0.999991 | 4.52973e-06 | 0.999991 |
| C2H2+PhCH2                    | 3.33534e-06 | 0.999994 | 3.33534e-06 | 0.999994 |
| PhCCCH3+H                     | 2.59304e-06 | 0.999997 | 2.59304e-06 | 0.999997 |
| Ph+MeAc                       | 2.00241e-06 | 0.999999 | 2.00241e-06 | 0.999999 |
| rad67                         | 5.99841e-07 | 1.000000 | 5.99841e-07 | 1.000000 |
| rad35                         | 2.63077e-07 | 1.000000 | 2.63077e-07 | 1.000000 |
| Ph+Allene                     | 1.88813e-07 | 1.000000 | 1.88813e-07 | 1.000000 |
| PhCH2CCH+H                    | 2.42192e-08 | 1.000000 | 2.42192e-08 | 1.000000 |
| PAH7+H                        | 2.38370e-08 | 1.000000 | 2.38370e-08 | 1.000000 |
| Benzene+cycloprop-2-enylidene | 2.30629e-08 | 1.000000 | 2.30629e-08 | 1.000000 |
| rad39                         | 6.72692e-09 | 1.000000 | 6.72692e-09 | 1.000000 |
| rad37                         | 6.29278e-09 | 1.000000 | 6.29278e-09 | 1.000000 |
| rad30                         | 4.94382e-09 | 1.000000 | 4.94382e-09 | 1.000000 |
| PAH9+H                        | 3.44262e-10 | 1.000000 | 3.44262e-10 | 1.000000 |
| rad38                         | 1.49234e-10 | 1.000000 | 1.49234e-10 | 1.000000 |
| rad60syn                      | 2.35177e-11 | 1.000000 | 2.35177e-11 | 1.000000 |
| rad60anti                     | 1.15765e-11 | 1.000000 | 1.15765e-11 | 1.000000 |
| PAH3+H                        | 1.04898e-11 | 1.000000 | 1.04898e-11 | 1.000000 |
| PAH10+CH3                     | 1.03809e-11 | 1.000000 | 1.03809e-11 | 1.000000 |
| rad46                         | 9.19554e-12 | 1.000000 | 9.19554e-12 | 1.000000 |
| rad59                         | 2.13885e-12 | 1.000000 | 2.13885e-12 | 1.000000 |
| PhcycC3H3_A+H                 | 1.87147e-12 | 1.000000 | 1.87147e-12 | 1.000000 |
| rad43                         | 4.52200e-13 | 1.000000 | 4.52200e-13 | 1.000000 |
| rad54                         | 3.83059e-13 | 1.000000 | 3.83059e-13 | 1.000000 |

|                               |             |         |             |         |
|-------------------------------|-------------|---------|-------------|---------|
| rad62                         | 9.87359e-14 | 1.00000 | 9.87359e-14 | 1.00000 |
| rad50                         | 7.13397e-14 | 1.00000 | 7.13397e-14 | 1.00000 |
| rad70                         | 7.09592e-15 | 1.00000 | 7.09592e-15 | 1.00000 |
| Phenyl+cycC3H4                | 5.18630e-15 | 1.00000 | 0.00000     | 1.00000 |
| Benzene+cycloprop-1-enylidene | 4.02908e-15 | 1.00000 | 4.02908e-15 | 1.00000 |
| rad55                         | 3.13590e-15 | 1.00000 | 3.13590e-15 | 1.00000 |
| PAH1+H                        | 1.72856e-15 | 1.00000 | 1.72856e-15 | 1.00000 |
| rad52                         | 5.11263e-16 | 1.00000 | 5.11263e-16 | 1.00000 |
| rad58                         | 1.84232e-16 | 1.00000 | 1.84232e-16 | 1.00000 |
| rad51                         | 1.44427e-16 | 1.00000 | 1.44427e-16 | 1.00000 |
| PhcycC3H3_B+H                 | 1.30407e-16 | 1.00000 | 1.30407e-16 | 1.00000 |
| rad34                         | 9.24232e-17 | 1.00000 | 9.24232e-17 | 1.00000 |
| rad41                         | 1.42061e-17 | 1.00000 | 1.42061e-17 | 1.00000 |
| rad42                         | 1.20969e-17 | 1.00000 | 1.20969e-17 | 1.00000 |
| rad65                         | 3.06484e-18 | 1.00000 | 3.06484e-18 | 1.00000 |
| rad53                         | 2.11093e-21 | 1.00000 | 2.11093e-21 | 1.00000 |
| rad64                         | 9.96386e-23 | 1.00000 | 9.96386e-23 | 1.00000 |
| rad61                         | 1.15972e-25 | 1.00000 | 1.15972e-25 | 1.00000 |
| rad56                         | 1.00969e-27 | 1.00000 | 1.00969e-27 | 1.00000 |
| rad68syn                      | 4.04803e-29 | 1.00000 | 4.04803e-29 | 1.00000 |
| rad68anti                     | 3.29762e-29 | 1.00000 | 3.29762e-29 | 1.00000 |
| rad6                          | 2.85157e-30 | 1.00000 | 2.85157e-30 | 1.00000 |
| rad26                         | 1.28162e-31 | 1.00000 | 1.28162e-31 | 1.00000 |
| rad28                         | 8.15882e-32 | 1.00000 | 8.15882e-32 | 1.00000 |
| rad47                         | 6.77038e-32 | 1.00000 | 6.77038e-32 | 1.00000 |
| rad2                          | 2.60175e-33 | 1.00000 | 2.60175e-33 | 1.00000 |
| rad40syn                      | 3.23201e-34 | 1.00000 | 3.23201e-34 | 1.00000 |
| rad40anti                     | 2.54378e-34 | 1.00000 | 2.54378e-34 | 1.00000 |
| rad7                          | 2.07822e-34 | 1.00000 | 2.07822e-34 | 1.00000 |
| rad1                          | 1.67654e-34 | 1.00000 | 1.67654e-34 | 1.00000 |
| rad10                         | 1.34034e-34 | 1.00000 | 1.34034e-34 | 1.00000 |
| rad19anti                     | 7.70499e-35 | 1.00000 | 7.70499e-35 | 1.00000 |
| rad73                         | 5.48405e-35 | 1.00000 | 5.48405e-35 | 1.00000 |
| rad11                         | 5.10006e-35 | 1.00000 | 5.10006e-35 | 1.00000 |
| rad14                         | 2.67405e-35 | 1.00000 | 2.67405e-35 | 1.00000 |
| rad3                          | 1.96142e-35 | 1.00000 | 1.96142e-35 | 1.00000 |
| rad25                         | 1.36917e-35 | 1.00000 | 1.36917e-35 | 1.00000 |
| rad4                          | 9.95222e-36 | 1.00000 | 9.95222e-36 | 1.00000 |
| rad27                         | 2.89760e-36 | 1.00000 | 2.89760e-36 | 1.00000 |
| rad13                         | 1.15444e-36 | 1.00000 | 1.15444e-36 | 1.00000 |
| rad9                          | 8.18140e-37 | 1.00000 | 8.18140e-37 | 1.00000 |
| rad5                          | 1.85303e-38 | 1.00000 | 1.85303e-38 | 1.00000 |
| rad33                         | 2.36176e-39 | 1.00000 | 2.36176e-39 | 1.00000 |
| rad31                         | 2.11326e-39 | 1.00000 | 2.11326e-39 | 1.00000 |
| rad15                         | 3.57309e-40 | 1.00000 | 3.57309e-40 | 1.00000 |
| rad20                         | 1.53759e-42 | 1.00000 | 1.53759e-42 | 1.00000 |
| rad21                         | 1.26493e-42 | 1.00000 | 1.26493e-42 | 1.00000 |
| rad19syn                      | 4.31564e-44 | 1.00000 | 4.31564e-44 | 1.00000 |
| rad12                         | 3.49302e-44 | 1.00000 | 3.49302e-44 | 1.00000 |
| rad18                         | 1.28851e-44 | 1.00000 | 1.28851e-44 | 1.00000 |
| PAH8+H                        | 1.08851e-44 | 1.00000 | 1.08851e-44 | 1.00000 |
| rad23                         | 3.24281e-45 | 1.00000 | 3.24281e-45 | 1.00000 |
| rad22                         | 6.49680e-47 | 1.00000 | 6.49680e-47 | 1.00000 |
| rad45                         | 2.18519e-47 | 1.00000 | 2.18519e-47 | 1.00000 |
| rad71                         | 5.50109e-48 | 1.00000 | 5.50109e-48 | 1.00000 |
| rad24                         | 4.05191e-48 | 1.00000 | 4.05191e-48 | 1.00000 |
| rad36                         | 1.33830e-48 | 1.00000 | 1.33830e-48 | 1.00000 |
| rad8                          | 2.88051e-65 | 1.00000 | 2.88051e-65 | 1.00000 |

0.100000000E-05 Pa, 120.000000 K

| Rate constant             | True (fraction)        | Effective (fraction)   |
|---------------------------|------------------------|------------------------|
| Total                     | 2.79817e-15 (1.00 )    | 2.79817e-15 (1.00 )    |
| Formation of rad19        | 2.79817e-15 (1.000 )   | 2.79817e-15 (1.000 )   |
| H-abstraction to cyc2enyl | 2.96039e-22 (1.06e-07) | 2.96039e-22 (1.06e-07) |
| H-abstraction to cyclenyl | 1.95323e-28 (6.98e-14) | 1.95323e-28 (6.98e-14) |

| species                       | PYtrue      | Cumul    | PYeffective | Cumul    |
|-------------------------------|-------------|----------|-------------|----------|
| Indene+H                      | 0.999721    | 0.999721 | 0.999721    | 0.999721 |
| PhCHCCH2+H                    | 0.000265418 | 0.999986 | 0.000265418 | 0.999986 |
| PhCCH+CH3                     | 4.66083e-06 | 0.999991 | 4.66083e-06 | 0.999991 |
| C2H2+PhCH2                    | 3.45258e-06 | 0.999994 | 3.45258e-06 | 0.999994 |
| PhCCCH3+H                     | 2.67609e-06 | 0.999997 | 2.67609e-06 | 0.999997 |
| Ph+MeAc                       | 2.08110e-06 | 0.999999 | 2.08110e-06 | 0.999999 |
| rad67                         | 6.22225e-07 | 1.000000 | 6.22225e-07 | 1.000000 |
| rad35                         | 2.72481e-07 | 1.00000  | 2.72481e-07 | 1.00000  |
| Ph+Allene                     | 1.98950e-07 | 1.00000  | 1.98950e-07 | 1.00000  |
| Benzene+cycloprop-2-enylidene | 1.05797e-07 | 1.00000  | 1.05797e-07 | 1.00000  |



|                               |             |         |             |         |
|-------------------------------|-------------|---------|-------------|---------|
| PhCH2CCH+H                    | 2.57406e-08 | 1.00000 | 2.57406e-08 | 1.00000 |
| PAH7+H                        | 2.49247e-08 | 1.00000 | 2.49247e-08 | 1.00000 |
| rad39                         | 7.03419e-09 | 1.00000 | 7.03419e-09 | 1.00000 |
| rad37                         | 6.59774e-09 | 1.00000 | 6.59774e-09 | 1.00000 |
| rad30                         | 5.12566e-09 | 1.00000 | 5.12566e-09 | 1.00000 |
| PAH9+H                        | 3.60882e-10 | 1.00000 | 3.60882e-10 | 1.00000 |
| rad38                         | 1.57196e-10 | 1.00000 | 1.57196e-10 | 1.00000 |
| rad60syn                      | 2.47458e-11 | 1.00000 | 2.47458e-11 | 1.00000 |
| rad60anti                     | 1.21972e-11 | 1.00000 | 1.21972e-11 | 1.00000 |
| PAH10+CH3                     | 1.14592e-11 | 1.00000 | 1.14592e-11 | 1.00000 |
| PAH3+H                        | 1.12460e-11 | 1.00000 | 1.12460e-11 | 1.00000 |
| rad46                         | 9.72362e-12 | 1.00000 | 9.72362e-12 | 1.00000 |
| PhcycC3H3_A+H                 | 2.33055e-12 | 1.00000 | 2.33055e-12 | 1.00000 |
| rad59                         | 2.28645e-12 | 1.00000 | 2.28645e-12 | 1.00000 |
| rad43                         | 4.93136e-13 | 1.00000 | 4.93136e-13 | 1.00000 |
| rad54                         | 4.22356e-13 | 1.00000 | 4.22356e-13 | 1.00000 |
| rad62                         | 1.07952e-13 | 1.00000 | 1.07952e-13 | 1.00000 |
| rad50                         | 7.74736e-14 | 1.00000 | 7.74736e-14 | 1.00000 |
| Benzene+cycloprop-1-enylidene | 6.98038e-14 | 1.00000 | 6.98038e-14 | 1.00000 |
| rad70                         | 8.06831e-15 | 1.00000 | 8.06831e-15 | 1.00000 |
| Phenyl+cycC3H4                | 7.86468e-15 | 1.00000 | 0.00000     | 1.00000 |
| rad55                         | 3.56798e-15 | 1.00000 | 3.56798e-15 | 1.00000 |
| PAH1+H                        | 2.06260e-15 | 1.00000 | 2.06260e-15 | 1.00000 |
| rad52                         | 5.66713e-16 | 1.00000 | 5.66713e-16 | 1.00000 |
| PhcycC3H3_B+H                 | 3.56809e-16 | 1.00000 | 3.56809e-16 | 1.00000 |
| rad58                         | 2.12355e-16 | 1.00000 | 2.12355e-16 | 1.00000 |
| rad51                         | 1.64161e-16 | 1.00000 | 1.64161e-16 | 1.00000 |
| rad34                         | 1.10600e-16 | 1.00000 | 1.10600e-16 | 1.00000 |
| rad41                         | 1.79639e-17 | 1.00000 | 1.79639e-17 | 1.00000 |
| rad42                         | 1.49203e-17 | 1.00000 | 1.49203e-17 | 1.00000 |
| rad65                         | 3.52612e-18 | 1.00000 | 3.52612e-18 | 1.00000 |
| rad53                         | 5.31327e-21 | 1.00000 | 5.31327e-21 | 1.00000 |
| rad64                         | 3.40977e-22 | 1.00000 | 3.40977e-22 | 1.00000 |
| rad61                         | 9.89208e-25 | 1.00000 | 9.89208e-25 | 1.00000 |
| rad56                         | 1.24744e-26 | 1.00000 | 1.24744e-26 | 1.00000 |
| rad68syn                      | 6.17070e-28 | 1.00000 | 6.17070e-28 | 1.00000 |
| rad68anti                     | 4.99495e-28 | 1.00000 | 4.99495e-28 | 1.00000 |
| rad6                          | 2.28515e-30 | 1.00000 | 2.28515e-30 | 1.00000 |
| rad26                         | 1.11458e-31 | 1.00000 | 1.11458e-31 | 1.00000 |
| rad28                         | 6.85226e-32 | 1.00000 | 6.85226e-32 | 1.00000 |
| rad47                         | 6.47611e-32 | 1.00000 | 6.47611e-32 | 1.00000 |
| rad40syn                      | 1.64573e-32 | 1.00000 | 1.64573e-32 | 1.00000 |
| rad40anti                     | 1.29414e-32 | 1.00000 | 1.29414e-32 | 1.00000 |
| rad2                          | 2.78145e-33 | 1.00000 | 2.78145e-33 | 1.00000 |
| rad73                         | 1.92333e-33 | 1.00000 | 1.92333e-33 | 1.00000 |
| rad1                          | 1.79927e-34 | 1.00000 | 1.79927e-34 | 1.00000 |
| rad7                          | 1.66822e-34 | 1.00000 | 1.66822e-34 | 1.00000 |
| rad19anti                     | 1.46733e-34 | 1.00000 | 1.46733e-34 | 1.00000 |
| rad10                         | 1.43640e-34 | 1.00000 | 1.43640e-34 | 1.00000 |
| PAH8+H                        | 4.13571e-35 | 1.00000 | 4.13571e-35 | 1.00000 |
| rad11                         | 4.09604e-35 | 1.00000 | 4.09604e-35 | 1.00000 |
| rad14                         | 2.54344e-35 | 1.00000 | 2.54344e-35 | 1.00000 |
| rad3                          | 2.17610e-35 | 1.00000 | 2.17610e-35 | 1.00000 |
| rad25                         | 1.32326e-35 | 1.00000 | 1.32326e-35 | 1.00000 |
| rad4                          | 1.10522e-35 | 1.00000 | 1.10522e-35 | 1.00000 |
| rad27                         | 2.82300e-36 | 1.00000 | 2.82300e-36 | 1.00000 |
| rad13                         | 9.27639e-37 | 1.00000 | 9.27639e-37 | 1.00000 |
| rad9                          | 8.89480e-37 | 1.00000 | 8.89480e-37 | 1.00000 |
| rad5                          | 1.64026e-38 | 1.00000 | 1.64026e-38 | 1.00000 |
| rad71                         | 1.32207e-38 | 1.00000 | 1.32207e-38 | 1.00000 |
| rad31                         | 3.43457e-39 | 1.00000 | 3.43457e-39 | 1.00000 |
| rad33                         | 1.94489e-39 | 1.00000 | 1.94489e-39 | 1.00000 |
| rad15                         | 3.89057e-40 | 1.00000 | 3.89057e-40 | 1.00000 |
| rad20                         | 1.67766e-42 | 1.00000 | 1.67766e-42 | 1.00000 |
| rad21                         | 1.38997e-42 | 1.00000 | 1.38997e-42 | 1.00000 |
| rad19syn                      | 9.31466e-44 | 1.00000 | 9.31466e-44 | 1.00000 |
| rad12                         | 4.54114e-44 | 1.00000 | 4.54114e-44 | 1.00000 |
| rad18                         | 1.30753e-44 | 1.00000 | 1.30753e-44 | 1.00000 |
| rad23                         | 4.71901e-45 | 1.00000 | 4.71901e-45 | 1.00000 |
| rad22                         | 6.19407e-47 | 1.00000 | 6.19407e-47 | 1.00000 |
| rad45                         | 3.22548e-47 | 1.00000 | 3.22548e-47 | 1.00000 |
| rad24                         | 5.00118e-48 | 1.00000 | 5.00118e-48 | 1.00000 |
| rad36                         | 1.97639e-48 | 1.00000 | 1.97639e-48 | 1.00000 |
| rad8                          | 4.02249e-65 | 1.00000 | 4.02249e-65 | 1.00000 |

0.100000000E-05 Pa, 130.000000 K

| Rate constant | True (fraction)    | Effective (fraction) |
|---------------|--------------------|----------------------|
| Total         | 3.81236e-15 (1.00) | 3.81236e-15 (1.00)   |

Formation of rad19 | 3.81236e-15 (1.000 ) 3.81236e-15 (1.000 )  
H-abstraction to cyc2enyl | 1.44825e-21 (3.80e-07) 1.44825e-21 (3.80e-07)  
H-abstraction to cyc1enyl | 2.94348e-27 (7.72e-13) 2.94348e-27 (7.72e-13)

| species                       | PYtrue      | Cumul    | PYeffective | Cumul    |
|-------------------------------|-------------|----------|-------------|----------|
| Indene+H                      | 0.999713    | 0.999713 | 0.999713    | 0.999713 |
| PhCHCCH2+H                    | 0.000272881 | 0.999986 | 0.000272881 | 0.999986 |
| PhCCH+CH3                     | 4.80155e-06 | 0.999990 | 4.80155e-06 | 0.999990 |
| C2H2+PhCH2                    | 3.57965e-06 | 0.999994 | 3.57965e-06 | 0.999994 |
| PhCCCH3+H                     | 2.76568e-06 | 0.999997 | 2.76568e-06 | 0.999997 |
| Ph+MeAc                       | 2.16669e-06 | 0.999999 | 2.16669e-06 | 0.999999 |
| rad67                         | 6.46538e-07 | 0.999999 | 6.46538e-07 | 0.999999 |
| Benzene+cycloprop-2-enylidene | 3.79882e-07 | 1.000000 | 3.79882e-07 | 1.000000 |
| rad35                         | 2.82679e-07 | 1.000000 | 2.82679e-07 | 1.000000 |
| Ph+Allene                     | 2.10177e-07 | 1.000000 | 2.10177e-07 | 1.000000 |
| PhCH2CCH+H                    | 2.74426e-08 | 1.000000 | 2.74426e-08 | 1.000000 |
| PAH7+H                        | 2.61181e-08 | 1.000000 | 2.61181e-08 | 1.000000 |
| rad39                         | 7.37119e-09 | 1.000000 | 7.37119e-09 | 1.000000 |
| rad37                         | 6.93326e-09 | 1.000000 | 6.93326e-09 | 1.000000 |
| rad30                         | 5.32333e-09 | 1.000000 | 5.32333e-09 | 1.000000 |
| PAH9+H                        | 3.79203e-10 | 1.000000 | 3.79203e-10 | 1.000000 |
| rad38                         | 1.66034e-10 | 1.000000 | 1.66034e-10 | 1.000000 |
| rad60syn                      | 2.61047e-11 | 1.000000 | 2.61047e-11 | 1.000000 |
| rad60anti                     | 1.28850e-11 | 1.000000 | 1.28850e-11 | 1.000000 |
| PAH10+CH3                     | 1.27171e-11 | 1.000000 | 1.27171e-11 | 1.000000 |
| PAH3+H                        | 1.21014e-11 | 1.000000 | 1.21014e-11 | 1.000000 |
| rad46                         | 1.03119e-11 | 1.000000 | 1.03119e-11 | 1.000000 |
| PhcycC3H3_A+H                 | 2.92361e-12 | 1.000000 | 2.92361e-12 | 1.000000 |
| rad59                         | 2.45281e-12 | 1.000000 | 2.45281e-12 | 1.000000 |
| Benzene+cycloprop-1-enylidene | 7.72089e-13 | 1.000000 | 7.72089e-13 | 1.000000 |
| rad43                         | 5.40149e-13 | 1.000000 | 5.40149e-13 | 1.000000 |
| rad54                         | 4.68163e-13 | 1.000000 | 4.68163e-13 | 1.000000 |
| rad62                         | 1.18546e-13 | 1.000000 | 1.18546e-13 | 1.000000 |
| rad50                         | 8.45270e-14 | 1.000000 | 8.45270e-14 | 1.000000 |
| Phenyl+cycC3H4                | 1.18041e-14 | 1.000000 | 0.000000    | 1.000000 |
| rad70                         | 9.23899e-15 | 1.000000 | 9.23899e-15 | 1.000000 |
| rad55                         | 4.08826e-15 | 1.000000 | 4.08826e-15 | 1.000000 |
| PAH1+H                        | 2.48400e-15 | 1.000000 | 2.48400e-15 | 1.000000 |
| PhcycC3H3_B+H                 | 8.71416e-16 | 1.000000 | 8.71416e-16 | 1.000000 |
| rad52                         | 6.31980e-16 | 1.000000 | 6.31980e-16 | 1.000000 |
| rad58                         | 2.46721e-16 | 1.000000 | 2.46721e-16 | 1.000000 |
| rad51                         | 1.88040e-16 | 1.000000 | 1.88040e-16 | 1.000000 |
| rad34                         | 1.33600e-16 | 1.000000 | 1.33600e-16 | 1.000000 |
| rad41                         | 2.28987e-17 | 1.000000 | 2.28987e-17 | 1.000000 |
| rad42                         | 1.85493e-17 | 1.000000 | 1.85493e-17 | 1.000000 |
| rad65                         | 4.09095e-18 | 1.000000 | 4.09095e-18 | 1.000000 |
| rad53                         | 1.20428e-20 | 1.000000 | 1.20428e-20 | 1.000000 |
| rad64                         | 1.00149e-21 | 1.000000 | 1.00149e-21 | 1.000000 |
| rad61                         | 6.20139e-24 | 1.000000 | 6.20139e-24 | 1.000000 |
| rad56                         | 1.06325e-25 | 1.000000 | 1.06325e-25 | 1.000000 |
| rad68syn                      | 6.24507e-27 | 1.000000 | 6.24507e-27 | 1.000000 |
| rad68anti                     | 5.02760e-27 | 1.000000 | 5.02760e-27 | 1.000000 |
| rad6                          | 1.88788e-30 | 1.000000 | 1.88788e-30 | 1.000000 |
| rad40syn                      | 4.43601e-31 | 1.000000 | 4.43601e-31 | 1.000000 |
| rad40anti                     | 3.49255e-31 | 1.000000 | 3.49255e-31 | 1.000000 |
| rad26                         | 9.83168e-32 | 1.000000 | 9.83168e-32 | 1.000000 |
| rad47                         | 6.28096e-32 | 1.000000 | 6.28096e-32 | 1.000000 |
| rad28                         | 5.84999e-32 | 1.000000 | 5.84999e-32 | 1.000000 |
| rad73                         | 3.97404e-32 | 1.000000 | 3.97404e-32 | 1.000000 |
| rad2                          | 3.23209e-33 | 1.000000 | 3.23209e-33 | 1.000000 |
| PAH8+H                        | 2.25812e-33 | 1.000000 | 2.25812e-33 | 1.000000 |
| rad19anti                     | 2.96678e-34 | 1.000000 | 2.96678e-34 | 1.000000 |
| rad1                          | 2.09962e-34 | 1.000000 | 2.09962e-34 | 1.000000 |
| rad10                         | 1.66861e-34 | 1.000000 | 1.66861e-34 | 1.000000 |
| rad7                          | 1.38062e-34 | 1.000000 | 1.38062e-34 | 1.000000 |
| rad11                         | 3.39178e-35 | 1.000000 | 3.39178e-35 | 1.000000 |
| rad3                          | 2.59381e-35 | 1.000000 | 2.59381e-35 | 1.000000 |
| rad14                         | 2.44795e-35 | 1.000000 | 2.44795e-35 | 1.000000 |
| rad4                          | 1.31879e-35 | 1.000000 | 1.31879e-35 | 1.000000 |
| rad25                         | 1.29463e-35 | 1.000000 | 1.29463e-35 | 1.000000 |
| rad27                         | 2.78576e-36 | 1.000000 | 2.78576e-36 | 1.000000 |
| rad71                         | 1.12266e-36 | 1.000000 | 1.12266e-36 | 1.000000 |
| rad9                          | 1.00025e-36 | 1.000000 | 1.00025e-36 | 1.000000 |
| rad13                         | 7.68546e-37 | 1.000000 | 7.68546e-37 | 1.000000 |
| rad5                          | 1.47192e-38 | 1.000000 | 1.47192e-38 | 1.000000 |
| rad31                         | 5.85937e-39 | 1.000000 | 5.85937e-39 | 1.000000 |
| rad33                         | 1.65923e-39 | 1.000000 | 1.65923e-39 | 1.000000 |
| rad15                         | 4.38195e-40 | 1.000000 | 4.38195e-40 | 1.000000 |
| rad20                         | 1.86337e-42 | 1.000000 | 1.86337e-42 | 1.000000 |

|          |             |         |             |         |
|----------|-------------|---------|-------------|---------|
| rad21    | 1.55544e-42 | 1.00000 | 1.55544e-42 | 1.00000 |
| rad19syn | 2.10397e-43 | 1.00000 | 2.10397e-43 | 1.00000 |
| rad12    | 6.09777e-44 | 1.00000 | 6.09777e-44 | 1.00000 |
| rad18    | 1.34472e-44 | 1.00000 | 1.34472e-44 | 1.00000 |
| rad23    | 7.56231e-45 | 1.00000 | 7.56231e-45 | 1.00000 |
| rad22    | 6.00095e-47 | 1.00000 | 6.00095e-47 | 1.00000 |
| rad45    | 5.29069e-47 | 1.00000 | 5.29069e-47 | 1.00000 |
| rad24    | 6.32157e-48 | 1.00000 | 6.32157e-48 | 1.00000 |
| rad36    | 3.24411e-48 | 1.00000 | 3.24411e-48 | 1.00000 |
| rad8     | 5.76907e-65 | 1.00000 | 5.76907e-65 | 1.00000 |

0.100000000E-05 Pa, 140.000000 K

```

=====
Rate constant          | True (fraction)          Effective (fraction)
-----
Total                  | 4.99515e-15 (1.00      ) 4.99515e-15 (1.00      )
Formation of rad19    | 4.99514e-15 (1.000    ) 4.99514e-15 (1.000    )
H-abstraction to cyc2enyl | 5.62488e-21 (1.13e-06) 5.62488e-21 (1.13e-06)
H-abstraction to cyclenyl | 3.00047e-26 (6.01e-12) 3.00047e-26 (6.01e-12)

```

| species                       | PYtrue      | Cumul    | PYeffective | Cumul    |
|-------------------------------|-------------|----------|-------------|----------|
| Indene+H                      | 0.999703    | 0.999703 | 0.999703    | 0.999703 |
| PhCHCCH2+H                    | 0.000280917 | 0.999984 | 0.000280917 | 0.999984 |
| PhCCH+CH3                     | 4.95294e-06 | 0.999989 | 4.95294e-06 | 0.999989 |
| C2H2+PhCH2                    | 3.71777e-06 | 0.999992 | 3.71777e-06 | 0.999992 |
| PhCCCH3+H                     | 2.86259e-06 | 0.999995 | 2.86259e-06 | 0.999995 |
| Ph+MeAc                       | 2.26007e-06 | 0.999998 | 2.26007e-06 | 0.999998 |
| Benzene+cycloprop-2-enylidene | 1.12607e-06 | 0.999999 | 1.12607e-06 | 0.999999 |
| rad67                         | 6.73023e-07 | 0.999999 | 6.73023e-07 | 0.999999 |
| rad35                         | 2.93770e-07 | 1.000000 | 2.93770e-07 | 1.000000 |
| Ph+Allene                     | 2.22660e-07 | 1.000000 | 2.22660e-07 | 1.000000 |
| PhCH2CCH+H                    | 2.93552e-08 | 1.000000 | 2.93552e-08 | 1.000000 |
| PAH7+H                        | 2.74321e-08 | 1.000000 | 2.74321e-08 | 1.000000 |
| rad39                         | 7.74205e-09 | 1.000000 | 7.74205e-09 | 1.000000 |
| rad37                         | 7.30375e-09 | 1.000000 | 7.30375e-09 | 1.000000 |
| rad30                         | 5.53888e-09 | 1.000000 | 5.53888e-09 | 1.000000 |
| PAH9+H                        | 3.99479e-10 | 1.000000 | 3.99479e-10 | 1.000000 |
| rad38                         | 1.75886e-10 | 1.000000 | 1.75886e-10 | 1.000000 |
| rad60syn                      | 2.76144e-11 | 1.000000 | 2.76144e-11 | 1.000000 |
| PAH10+CH3                     | 1.41941e-11 | 1.000000 | 1.41941e-11 | 1.000000 |
| rad60anti                     | 1.36504e-11 | 1.000000 | 1.36504e-11 | 1.000000 |
| PAH3+H                        | 1.30742e-11 | 1.000000 | 1.30742e-11 | 1.000000 |
| rad46                         | 1.09703e-11 | 1.000000 | 1.09703e-11 | 1.000000 |
| Benzene+cycloprop-1-enylidene | 6.00677e-12 | 1.000000 | 6.00677e-12 | 1.000000 |
| PhcycC3H3_A+H                 | 3.69543e-12 | 1.000000 | 3.69543e-12 | 1.000000 |
| rad59                         | 2.64125e-12 | 1.000000 | 2.64125e-12 | 1.000000 |
| rad43                         | 5.94445e-13 | 1.000000 | 5.94445e-13 | 1.000000 |
| rad54                         | 5.21920e-13 | 1.000000 | 5.21920e-13 | 1.000000 |
| rad62                         | 1.30794e-13 | 1.000000 | 1.30794e-13 | 1.000000 |
| rad50                         | 9.26896e-14 | 1.000000 | 9.26896e-14 | 1.000000 |
| Phenyl+cycC3H4                | 1.75978e-14 | 1.000000 | 0.000000    | 1.000000 |
| rad70                         | 1.06600e-14 | 1.000000 | 1.06600e-14 | 1.000000 |
| rad55                         | 4.71987e-15 | 1.000000 | 4.71987e-15 | 1.000000 |
| PAH1+H                        | 3.02080e-15 | 1.000000 | 3.02080e-15 | 1.000000 |
| PhcycC3H3_B+H                 | 1.95210e-15 | 1.000000 | 1.95210e-15 | 1.000000 |
| rad52                         | 7.09403e-16 | 1.000000 | 7.09403e-16 | 1.000000 |
| rad58                         | 2.89095e-16 | 1.000000 | 2.89095e-16 | 1.000000 |
| rad51                         | 2.17208e-16 | 1.000000 | 2.17208e-16 | 1.000000 |
| rad34                         | 1.62990e-16 | 1.000000 | 1.62990e-16 | 1.000000 |
| rad41                         | 2.94364e-17 | 1.000000 | 2.94364e-17 | 1.000000 |
| rad42                         | 2.32499e-17 | 1.000000 | 2.32499e-17 | 1.000000 |
| rad65                         | 4.78938e-18 | 1.000000 | 4.78938e-18 | 1.000000 |
| rad53                         | 2.52919e-20 | 1.000000 | 2.52919e-20 | 1.000000 |
| rad64                         | 2.62060e-21 | 1.000000 | 2.62060e-21 | 1.000000 |
| rad61                         | 3.06689e-23 | 1.000000 | 3.06689e-23 | 1.000000 |
| rad56                         | 6.80095e-25 | 1.000000 | 6.80095e-25 | 1.000000 |
| rad68syn                      | 4.60298e-26 | 1.000000 | 4.60298e-26 | 1.000000 |
| rad68anti                     | 3.68680e-26 | 1.000000 | 3.68680e-26 | 1.000000 |
| rad40syn                      | 7.53654e-30 | 1.000000 | 7.53654e-30 | 1.000000 |
| rad40anti                     | 5.95184e-30 | 1.000000 | 5.95184e-30 | 1.000000 |
| rad6                          | 1.60838e-30 | 1.000000 | 1.60838e-30 | 1.000000 |
| rad73                         | 5.47778e-31 | 1.000000 | 5.47778e-31 | 1.000000 |
| rad26                         | 8.77784e-32 | 1.000000 | 8.77784e-32 | 1.000000 |
| PAH8+H                        | 6.68141e-32 | 1.000000 | 6.68141e-32 | 1.000000 |
| rad47                         | 6.17130e-32 | 1.000000 | 6.17130e-32 | 1.000000 |
| rad28                         | 5.06345e-32 | 1.000000 | 5.06345e-32 | 1.000000 |
| rad2                          | 4.05494e-33 | 1.000000 | 4.05494e-33 | 1.000000 |
| rad19anti                     | 6.35582e-34 | 1.000000 | 6.35582e-34 | 1.000000 |
| rad1                          | 2.64629e-34 | 1.000000 | 2.64629e-34 | 1.000000 |

|          |             |          |             |          |
|----------|-------------|----------|-------------|----------|
| rad10    | 2.09364e-34 | 1.000000 | 2.09364e-34 | 1.000000 |
| rad7     | 1.17835e-34 | 1.000000 | 1.17835e-34 | 1.000000 |
| rad71    | 4.16930e-35 | 1.000000 | 4.16930e-35 | 1.000000 |
| rad3     | 3.30162e-35 | 1.000000 | 3.30162e-35 | 1.000000 |
| rad11    | 2.89657e-35 | 1.000000 | 2.89657e-35 | 1.000000 |
| rad14    | 2.38035e-35 | 1.000000 | 2.38035e-35 | 1.000000 |
| rad4     | 1.68066e-35 | 1.000000 | 1.68066e-35 | 1.000000 |
| rad25    | 1.28024e-35 | 1.000000 | 1.28024e-35 | 1.000000 |
| rad27    | 2.78010e-36 | 1.000000 | 2.78010e-36 | 1.000000 |
| rad9     | 1.15951e-36 | 1.000000 | 1.15951e-36 | 1.000000 |
| rad13    | 6.56699e-37 | 1.000000 | 6.56699e-37 | 1.000000 |
| rad5     | 1.33588e-38 | 1.000000 | 1.33588e-38 | 1.000000 |
| rad31    | 1.04783e-38 | 1.000000 | 1.04783e-38 | 1.000000 |
| rad33    | 1.46674e-39 | 1.000000 | 1.46674e-39 | 1.000000 |
| rad15    | 5.08794e-40 | 1.000000 | 5.08794e-40 | 1.000000 |
| rad20    | 2.10321e-42 | 1.000000 | 2.10321e-42 | 1.000000 |
| rad21    | 1.76959e-42 | 1.000000 | 1.76959e-42 | 1.000000 |
| rad19syn | 4.98180e-43 | 1.000000 | 4.98180e-43 | 1.000000 |
| rad12    | 8.43689e-44 | 1.000000 | 8.43689e-44 | 1.000000 |
| rad18    | 1.39918e-44 | 1.000000 | 1.39918e-44 | 1.000000 |
| rad23    | 1.32697e-44 | 1.000000 | 1.32697e-44 | 1.000000 |
| rad45    | 9.43607e-47 | 1.000000 | 9.43607e-47 | 1.000000 |
| rad22    | 5.89984e-47 | 1.000000 | 5.89984e-47 | 1.000000 |
| rad24    | 8.16996e-48 | 1.000000 | 8.16996e-48 | 1.000000 |
| rad36    | 5.79134e-48 | 1.000000 | 5.79134e-48 | 1.000000 |
| rad8     | 8.48093e-65 | 1.000000 | 8.48093e-65 | 1.000000 |

0.100000000E-05 Pa, 150.00000 K

| Rate constant             | True (fraction)        | Effective (fraction)   |
|---------------------------|------------------------|------------------------|
| Total                     | 6.34137e-15 (1.00 )    | 6.34137e-15 (1.00 )    |
| Formation of rad19        | 6.34135e-15 (1.000 )   | 6.34135e-15 (1.000 )   |
| H-abstraction to cyc2enyl | 1.81685e-20 (2.87e-06) | 1.81685e-20 (2.87e-06) |
| H-abstraction to cyc1enyl | 2.23765e-25 (3.53e-11) | 2.23765e-25 (3.53e-11) |

| species                       | PYtrue      | Cumul    | PYeffective | Cumul    |
|-------------------------------|-------------|----------|-------------|----------|
| Indene+H                      | 0.999692    | 0.999692 | 0.999692    | 0.999692 |
| PhCHCCH2+H                    | 0.000289592 | 0.999982 | 0.000289592 | 0.999982 |
| PhCCH+CH3                     | 5.11623e-06 | 0.999987 | 5.11623e-06 | 0.999987 |
| C2H2+PhCH2                    | 3.86834e-06 | 0.999991 | 3.86834e-06 | 0.999991 |
| PhCCCH3+H                     | 2.96768e-06 | 0.999994 | 2.96768e-06 | 0.999994 |
| Benzene+cycloprop-2-enylidene | 2.86508e-06 | 0.999997 | 2.86508e-06 | 0.999997 |
| Ph+MeAc                       | 2.36224e-06 | 0.999999 | 2.36224e-06 | 0.999999 |
| rad67                         | 7.01968e-07 | 1.000000 | 7.01968e-07 | 1.000000 |
| rad35                         | 3.05869e-07 | 1.000000 | 3.05869e-07 | 1.000000 |
| Ph+Allene                     | 2.36598e-07 | 1.000000 | 2.36598e-07 | 1.000000 |
| PhCH2CCH+H                    | 3.15146e-08 | 1.000000 | 3.15146e-08 | 1.000000 |
| PAH7+H                        | 2.88839e-08 | 1.000000 | 2.88839e-08 | 1.000000 |
| rad39                         | 8.15167e-09 | 1.000000 | 8.15167e-09 | 1.000000 |
| rad37                         | 7.71444e-09 | 1.000000 | 7.71444e-09 | 1.000000 |
| rad30                         | 5.77470e-09 | 1.000000 | 5.77470e-09 | 1.000000 |
| PAH9+H                        | 4.22009e-10 | 1.000000 | 4.22009e-10 | 1.000000 |
| rad38                         | 1.86919e-10 | 1.000000 | 1.86919e-10 | 1.000000 |
| Benzene+cycloprop-1-enylidene | 3.52865e-11 | 1.000000 | 3.52865e-11 | 1.000000 |
| rad60syn                      | 2.92988e-11 | 1.000000 | 2.92988e-11 | 1.000000 |
| PAH10+CH3                     | 1.59406e-11 | 1.000000 | 1.59406e-11 | 1.000000 |
| rad60anti                     | 1.45059e-11 | 1.000000 | 1.45059e-11 | 1.000000 |
| PAH3+H                        | 1.41866e-11 | 1.000000 | 1.41866e-11 | 1.000000 |
| rad46                         | 1.17105e-11 | 1.000000 | 1.17105e-11 | 1.000000 |
| PhcycC3H3_A+H                 | 4.70694e-12 | 1.000000 | 4.70694e-12 | 1.000000 |
| rad59                         | 2.85583e-12 | 1.000000 | 2.85583e-12 | 1.000000 |
| rad43                         | 6.57518e-13 | 1.000000 | 6.57518e-13 | 1.000000 |
| rad54                         | 5.85445e-13 | 1.000000 | 5.85445e-13 | 1.000000 |
| rad62                         | 1.45031e-13 | 1.000000 | 1.45031e-13 | 1.000000 |
| rad50                         | 1.02199e-13 | 1.000000 | 1.02199e-13 | 1.000000 |
| Phenyl+cycC3H4                | 2.61242e-14 | 1.000000 | 0.000000    | 1.000000 |
| rad70                         | 1.23994e-14 | 1.000000 | 1.23994e-14 | 1.000000 |
| rad55                         | 5.49294e-15 | 1.000000 | 5.49294e-15 | 1.000000 |
| PhcycC3H3_B+H                 | 4.08980e-15 | 1.000000 | 4.08980e-15 | 1.000000 |
| PAH1+H                        | 3.71111e-15 | 1.000000 | 3.71111e-15 | 1.000000 |
| rad52                         | 8.01986e-16 | 1.000000 | 8.01986e-16 | 1.000000 |
| rad58                         | 3.41821e-16 | 1.000000 | 3.41821e-16 | 1.000000 |
| rad51                         | 2.53178e-16 | 1.000000 | 2.53178e-16 | 1.000000 |
| rad34                         | 2.00908e-16 | 1.000000 | 2.00908e-16 | 1.000000 |
| rad41                         | 3.81682e-17 | 1.000000 | 3.81682e-17 | 1.000000 |
| rad42                         | 2.93833e-17 | 1.000000 | 2.93833e-17 | 1.000000 |
| rad65                         | 5.66164e-18 | 1.000000 | 5.66164e-18 | 1.000000 |
| rad53                         | 5.02100e-20 | 1.000000 | 5.02100e-20 | 1.000000 |

|           |             |         |             |         |
|-----------|-------------|---------|-------------|---------|
| rad64     | 6.27506e-21 | 1.00000 | 6.27506e-21 | 1.00000 |
| rad61     | 1.25963e-22 | 1.00000 | 1.25963e-22 | 1.00000 |
| rad56     | 3.47179e-24 | 1.00000 | 3.47179e-24 | 1.00000 |
| rad68syn  | 2.64356e-25 | 1.00000 | 2.64356e-25 | 1.00000 |
| rad68anti | 2.10658e-25 | 1.00000 | 2.10658e-25 | 1.00000 |
| rad40syn  | 8.88016e-29 | 1.00000 | 8.88016e-29 | 1.00000 |
| rad40anti | 7.03998e-29 | 1.00000 | 7.03998e-29 | 1.00000 |
| rad73     | 5.47735e-30 | 1.00000 | 5.47735e-30 | 1.00000 |
| rad6      | 1.41806e-30 | 1.00000 | 1.41806e-30 | 1.00000 |
| PAH8+H    | 1.26388e-30 | 1.00000 | 1.26388e-30 | 1.00000 |
| rad26     | 7.92074e-32 | 1.00000 | 7.92074e-32 | 1.00000 |
| rad47     | 6.13965e-32 | 1.00000 | 6.13965e-32 | 1.00000 |
| rad28     | 4.43496e-32 | 1.00000 | 4.43496e-32 | 1.00000 |
| rad2      | 5.44311e-33 | 1.00000 | 5.44311e-33 | 1.00000 |
| rad19anti | 1.44032e-33 | 1.00000 | 1.44032e-33 | 1.00000 |
| rad71     | 9.41848e-34 | 1.00000 | 9.41848e-34 | 1.00000 |
| rad1      | 3.57007e-34 | 1.00000 | 3.57007e-34 | 1.00000 |
| rad10     | 2.80519e-34 | 1.00000 | 2.80519e-34 | 1.00000 |
| rad7      | 1.04087e-34 | 1.00000 | 1.04087e-34 | 1.00000 |
| rad3      | 4.47586e-35 | 1.00000 | 4.47586e-35 | 1.00000 |
| rad11     | 2.56016e-35 | 1.00000 | 2.56016e-35 | 1.00000 |
| rad14     | 2.33568e-35 | 1.00000 | 2.33568e-35 | 1.00000 |
| rad4      | 2.28138e-35 | 1.00000 | 2.28138e-35 | 1.00000 |
| rad25     | 1.27807e-35 | 1.00000 | 1.27807e-35 | 1.00000 |
| rad27     | 2.80248e-36 | 1.00000 | 2.80248e-36 | 1.00000 |
| rad9      | 1.38218e-36 | 1.00000 | 1.38218e-36 | 1.00000 |
| rad13     | 5.80779e-37 | 1.00000 | 5.80779e-37 | 1.00000 |
| rad31     | 1.96254e-38 | 1.00000 | 1.96254e-38 | 1.00000 |
| rad5      | 1.22395e-38 | 1.00000 | 1.22395e-38 | 1.00000 |
| rad33     | 1.34683e-39 | 1.00000 | 1.34683e-39 | 1.00000 |
| rad15     | 6.07520e-40 | 1.00000 | 6.07520e-40 | 1.00000 |
| rad20     | 2.40933e-42 | 1.00000 | 2.40933e-42 | 1.00000 |
| rad21     | 2.04416e-42 | 1.00000 | 2.04416e-42 | 1.00000 |
| rad19syn  | 1.23836e-42 | 1.00000 | 1.23836e-42 | 1.00000 |
| rad12     | 1.20084e-43 | 1.00000 | 1.20084e-43 | 1.00000 |
| rad23     | 2.54124e-44 | 1.00000 | 2.54124e-44 | 1.00000 |
| rad18     | 1.47096e-44 | 1.00000 | 1.47096e-44 | 1.00000 |
| rad45     | 1.84946e-46 | 1.00000 | 1.84946e-46 | 1.00000 |
| rad22     | 5.88976e-47 | 1.00000 | 5.88976e-47 | 1.00000 |
| rad36     | 1.13644e-47 | 1.00000 | 1.13644e-47 | 1.00000 |
| rad24     | 1.07837e-47 | 1.00000 | 1.07837e-47 | 1.00000 |
| rad8      | 1.27613e-64 | 1.00000 | 1.27613e-64 | 1.00000 |

0.100000000E-05 Pa, 160.00000 K

| Rate constant             | True (fraction)        | Effective (fraction)   |
|---------------------------|------------------------|------------------------|
| Total                     | 7.84423e-15 (1.00 )    | 7.84423e-15 (1.00 )    |
| Formation of rad19        | 7.84418e-15 (1.000 )   | 7.84418e-15 (1.000 )   |
| H-abstraction to cyc2enyl | 5.05321e-20 (6.44e-06) | 5.05321e-20 (6.44e-06) |
| H-abstraction to cyclenyl | 1.29479e-24 (1.65e-10) | 1.29479e-24 (1.65e-10) |

| species                       | PYtrue      | Cumul    | PYeffective | Cumul    |
|-------------------------------|-------------|----------|-------------|----------|
| Indene+H                      | 0.999679    | 0.999679 | 0.999679    | 0.999679 |
| PhCHCCH2+H                    | 0.000298982 | 0.999978 | 0.000298982 | 0.999978 |
| Benzene+cycloprop-2-enylidene | 6.44194e-06 | 0.999984 | 6.44194e-06 | 0.999984 |
| PhCCH+CH3                     | 5.29275e-06 | 0.999989 | 5.29275e-06 | 0.999989 |
| C2H2+PhCH2                    | 4.03297e-06 | 0.999993 | 4.03297e-06 | 0.999993 |
| PhCCCH3+H                     | 3.08198e-06 | 0.999996 | 3.08198e-06 | 0.999996 |
| Ph+MeAc                       | 2.47440e-06 | 0.999999 | 2.47440e-06 | 0.999999 |
| rad67                         | 7.33696e-07 | 1.000000 | 7.33696e-07 | 1.000000 |
| rad35                         | 3.19106e-07 | 1.000000 | 3.19106e-07 | 1.000000 |
| Ph+Allene                     | 2.52225e-07 | 1.000000 | 2.52225e-07 | 1.000000 |
| PhCH2CCH+H                    | 3.39643e-08 | 1.000000 | 3.39643e-08 | 1.000000 |
| PAH7+H                        | 3.04941e-08 | 1.000000 | 3.04941e-08 | 1.000000 |
| rad39                         | 8.60567e-09 | 1.000000 | 8.60567e-09 | 1.000000 |
| rad37                         | 8.17136e-09 | 1.000000 | 8.17136e-09 | 1.000000 |
| rad30                         | 6.03351e-09 | 1.000000 | 6.03351e-09 | 1.000000 |
| PAH9+H                        | 4.47144e-10 | 1.000000 | 4.47144e-10 | 1.000000 |
| rad38                         | 1.99330e-10 | 1.000000 | 1.99330e-10 | 1.000000 |
| Benzene+cycloprop-1-enylidene | 1.65062e-10 | 1.000000 | 1.65062e-10 | 1.000000 |
| rad60syn                      | 3.11859e-11 | 1.000000 | 3.11859e-11 | 1.000000 |
| PAH10+CH3                     | 1.80192e-11 | 1.000000 | 1.80192e-11 | 1.000000 |
| rad60anti                     | 1.54660e-11 | 1.000000 | 1.54660e-11 | 1.000000 |
| PAH3+H                        | 1.54653e-11 | 1.000000 | 1.54653e-11 | 1.000000 |
| rad46                         | 1.25466e-11 | 1.000000 | 1.25466e-11 | 1.000000 |
| PhcycC3H3_A+H                 | 6.04093e-12 | 1.000000 | 6.04093e-12 | 1.000000 |
| rad59                         | 3.10145e-12 | 1.000000 | 3.10145e-12 | 1.000000 |
| rad43                         | 7.31202e-13 | 1.000000 | 7.31202e-13 | 1.000000 |

|                |             |         |             |         |
|----------------|-------------|---------|-------------|---------|
| rad54          | 6.61022e-13 | 1.00000 | 6.61022e-13 | 1.00000 |
| rad62          | 1.61671e-13 | 1.00000 | 1.61671e-13 | 1.00000 |
| rad50          | 1.13351e-13 | 1.00000 | 1.13351e-13 | 1.00000 |
| Phenyl+cycC3H4 | 3.86829e-14 | 1.00000 | 0.00000     | 1.00000 |
| rad70          | 1.45456e-14 | 1.00000 | 1.45456e-14 | 1.00000 |
| PhcycC3H3_B+H  | 8.12740e-15 | 1.00000 | 8.12740e-15 | 1.00000 |
| rad55          | 6.44670e-15 | 1.00000 | 6.44670e-15 | 1.00000 |
| PAH1+H         | 4.60690e-15 | 1.00000 | 4.60690e-15 | 1.00000 |
| rad52          | 9.13581e-16 | 1.00000 | 9.13581e-16 | 1.00000 |
| rad58          | 4.08006e-16 | 1.00000 | 4.08006e-16 | 1.00000 |
| rad51          | 2.97957e-16 | 1.00000 | 2.97957e-16 | 1.00000 |
| rad34          | 2.50279e-16 | 1.00000 | 2.50279e-16 | 1.00000 |
| rad41          | 4.99159e-17 | 1.00000 | 4.99159e-17 | 1.00000 |
| rad42          | 3.74399e-17 | 1.00000 | 3.74399e-17 | 1.00000 |
| rad65          | 6.76165e-18 | 1.00000 | 6.76165e-18 | 1.00000 |
| rad53          | 9.55513e-20 | 1.00000 | 9.55513e-20 | 1.00000 |
| rad64          | 1.40204e-20 | 1.00000 | 1.40204e-20 | 1.00000 |
| rad61          | 4.46330e-22 | 1.00000 | 4.46330e-22 | 1.00000 |
| rad56          | 1.48090e-23 | 1.00000 | 1.48090e-23 | 1.00000 |
| rad68syn       | 1.24419e-24 | 1.00000 | 1.24419e-24 | 1.00000 |
| rad68anti      | 9.86157e-25 | 1.00000 | 9.86157e-25 | 1.00000 |
| rad40syn       | 7.79816e-28 | 1.00000 | 7.79816e-28 | 1.00000 |
| rad40anti      | 6.20621e-28 | 1.00000 | 6.20621e-28 | 1.00000 |
| rad73          | 4.23082e-29 | 1.00000 | 4.23082e-29 | 1.00000 |
| PAH8+H         | 1.68146e-29 | 1.00000 | 1.68146e-29 | 1.00000 |
| rad6           | 1.30389e-30 | 1.00000 | 1.30389e-30 | 1.00000 |
| rad26          | 7.21789e-32 | 1.00000 | 7.21789e-32 | 1.00000 |
| rad47          | 6.18322e-32 | 1.00000 | 6.18322e-32 | 1.00000 |
| rad28          | 3.92595e-32 | 1.00000 | 3.92595e-32 | 1.00000 |
| rad71          | 1.46142e-32 | 1.00000 | 1.46142e-32 | 1.00000 |
| rad2           | 7.75606e-33 | 1.00000 | 7.75606e-33 | 1.00000 |
| rad19anti      | 3.44720e-33 | 1.00000 | 3.44720e-33 | 1.00000 |
| rad1           | 5.11495e-34 | 1.00000 | 5.11495e-34 | 1.00000 |
| rad10          | 4.00281e-34 | 1.00000 | 4.00281e-34 | 1.00000 |
| rad7           | 9.58924e-35 | 1.00000 | 9.58924e-35 | 1.00000 |
| rad3           | 6.36268e-35 | 1.00000 | 6.36268e-35 | 1.00000 |
| rad4           | 3.24777e-35 | 1.00000 | 3.24777e-35 | 1.00000 |
| rad11          | 2.35998e-35 | 1.00000 | 2.35998e-35 | 1.00000 |
| rad14          | 2.31055e-35 | 1.00000 | 2.31055e-35 | 1.00000 |
| rad25          | 1.28685e-35 | 1.00000 | 1.28685e-35 | 1.00000 |
| rad27          | 2.85097e-36 | 1.00000 | 2.85097e-36 | 1.00000 |
| rad9           | 1.69112e-36 | 1.00000 | 1.69112e-36 | 1.00000 |
| rad13          | 5.35733e-37 | 1.00000 | 5.35733e-37 | 1.00000 |
| rad31          | 3.84760e-38 | 1.00000 | 3.84760e-38 | 1.00000 |
| rad5           | 1.13038e-38 | 1.00000 | 1.13038e-38 | 1.00000 |
| rad33          | 1.29102e-39 | 1.00000 | 1.29102e-39 | 1.00000 |
| rad15          | 7.44608e-40 | 1.00000 | 7.44608e-40 | 1.00000 |
| rad19syn       | 3.23538e-42 | 1.00000 | 3.23538e-42 | 1.00000 |
| rad20          | 2.79854e-42 | 1.00000 | 2.79854e-42 | 1.00000 |
| rad21          | 2.39540e-42 | 1.00000 | 2.39540e-42 | 1.00000 |
| rad12          | 1.75628e-43 | 1.00000 | 1.75628e-43 | 1.00000 |
| rad23          | 5.30720e-44 | 1.00000 | 5.30720e-44 | 1.00000 |
| rad18          | 1.56082e-44 | 1.00000 | 1.56082e-44 | 1.00000 |
| rad45          | 3.97426e-46 | 1.00000 | 3.97426e-46 | 1.00000 |
| rad22          | 5.99491e-47 | 1.00000 | 5.99491e-47 | 1.00000 |
| rad36          | 2.44561e-47 | 1.00000 | 2.44561e-47 | 1.00000 |
| rad24          | 1.45255e-47 | 1.00000 | 1.45255e-47 | 1.00000 |
| rad8           | 1.96347e-64 | 1.00000 | 1.96347e-64 | 1.00000 |

0.100000000E-05 Pa, 170.000000 K

| Rate constant             | True (fraction)        | Effective (fraction)   |
|---------------------------|------------------------|------------------------|
| Total                     | 9.49598e-15 (1.00 )    | 9.49598e-15 (1.00 )    |
| Formation of rad19        | 9.49586e-15 (1.000 )   | 9.49586e-15 (1.000 )   |
| H-abstraction to cyc2enyl | 1.24279e-19 (1.31e-05) | 1.24279e-19 (1.31e-05) |
| H-abstraction to cyclenyl | 6.08025e-24 (6.40e-10) | 6.08025e-24 (6.40e-10) |

| species                       | PYtrue      | Cumul    | PYeffective | Cumul    |
|-------------------------------|-------------|----------|-------------|----------|
| Indene+H                      | 0.999661    | 0.999661 | 0.999661    | 0.999661 |
| PhCHCCH2+H                    | 0.000309167 | 0.999970 | 0.000309167 | 0.999970 |
| Benzene+cycloprop-2-enylidene | 1.30875e-05 | 0.999983 | 1.30875e-05 | 0.999983 |
| PhCCH+CH3                     | 5.48398e-06 | 0.999989 | 5.48398e-06 | 0.999989 |
| C2H2+PhCH2                    | 4.21347e-06 | 0.999993 | 4.21347e-06 | 0.999993 |
| PhCCCH3+H                     | 3.20659e-06 | 0.999996 | 3.20659e-06 | 0.999996 |
| Ph+MeAc                       | 2.59788e-06 | 0.999999 | 2.59788e-06 | 0.999999 |
| rad67                         | 7.68575e-07 | 0.999999 | 7.68575e-07 | 0.999999 |
| rad35                         | 3.33631e-07 | 1.000000 | 3.33631e-07 | 1.000000 |
| Ph+Allene                     | 2.69815e-07 | 1.000000 | 2.69815e-07 | 1.000000 |

|                               |             |         |             |         |
|-------------------------------|-------------|---------|-------------|---------|
| PhCH2CCH+H                    | 3.67554e-08 | 1.00000 | 3.67554e-08 | 1.00000 |
| PAH7+H                        | 3.22859e-08 | 1.00000 | 3.22859e-08 | 1.00000 |
| rad39                         | 9.11054e-09 | 1.00000 | 9.11054e-09 | 1.00000 |
| rad37                         | 8.68151e-09 | 1.00000 | 8.68151e-09 | 1.00000 |
| rad30                         | 6.31840e-09 | 1.00000 | 6.31840e-09 | 1.00000 |
| Benzene+cycloprop-1-enylidene | 6.40297e-10 | 1.00000 | 6.40297e-10 | 1.00000 |
| PAH9+H                        | 4.75294e-10 | 1.00000 | 4.75294e-10 | 1.00000 |
| rad38                         | 2.13351e-10 | 1.00000 | 2.13351e-10 | 1.00000 |
| rad60syn                      | 3.33085e-11 | 1.00000 | 3.33085e-11 | 1.00000 |
| PAH10+CH3                     | 2.05094e-11 | 1.00000 | 2.05094e-11 | 1.00000 |
| PAH3+H                        | 1.69431e-11 | 1.00000 | 1.69431e-11 | 1.00000 |
| rad60anti                     | 1.65480e-11 | 1.00000 | 1.65480e-11 | 1.00000 |
| rad46                         | 1.34952e-11 | 1.00000 | 1.34952e-11 | 1.00000 |
| PhcycC3H3_A+H                 | 7.80973e-12 | 1.00000 | 7.80973e-12 | 1.00000 |
| rad59                         | 3.38400e-12 | 1.00000 | 3.38400e-12 | 1.00000 |
| rad43                         | 8.17741e-13 | 1.00000 | 8.17741e-13 | 1.00000 |
| rad54                         | 7.51515e-13 | 1.00000 | 7.51515e-13 | 1.00000 |
| rad62                         | 1.81221e-13 | 1.00000 | 1.81221e-13 | 1.00000 |
| rad50                         | 1.26512e-13 | 1.00000 | 1.26512e-13 | 1.00000 |
| Phenyl+cycC3H4                | 5.71891e-14 | 1.00000 | 0.00000     | 1.00000 |
| rad70                         | 1.72142e-14 | 1.00000 | 1.72142e-14 | 1.00000 |
| PhcycC3H3_B+H                 | 1.54798e-14 | 1.00000 | 1.54798e-14 | 1.00000 |
| rad55                         | 7.63216e-15 | 1.00000 | 7.63216e-15 | 1.00000 |
| PAH1+H                        | 5.77897e-15 | 1.00000 | 5.77897e-15 | 1.00000 |
| rad52                         | 1.04913e-15 | 1.00000 | 1.04913e-15 | 1.00000 |
| rad58                         | 4.91782e-16 | 1.00000 | 4.91782e-16 | 1.00000 |
| rad51                         | 3.54209e-16 | 1.00000 | 3.54209e-16 | 1.00000 |
| rad34                         | 3.15103e-16 | 1.00000 | 3.15103e-16 | 1.00000 |
| rad41                         | 6.58203e-17 | 1.00000 | 6.58203e-17 | 1.00000 |
| rad42                         | 4.80841e-17 | 1.00000 | 4.80841e-17 | 1.00000 |
| rad65                         | 8.16177e-18 | 1.00000 | 8.16177e-18 | 1.00000 |
| rad53                         | 1.76035e-19 | 1.00000 | 1.76035e-19 | 1.00000 |
| rad64                         | 2.96517e-20 | 1.00000 | 2.96517e-20 | 1.00000 |
| rad61                         | 1.40406e-21 | 1.00000 | 1.40406e-21 | 1.00000 |
| rad56                         | 5.46521e-23 | 1.00000 | 5.46521e-23 | 1.00000 |
| rad68syn                      | 4.98616e-24 | 1.00000 | 4.98616e-24 | 1.00000 |
| rad68anti                     | 3.92935e-24 | 1.00000 | 3.92935e-24 | 1.00000 |
| rad40syn                      | 5.38958e-27 | 1.00000 | 5.38958e-27 | 1.00000 |
| rad40anti                     | 4.30388e-27 | 1.00000 | 4.30388e-27 | 1.00000 |
| rad73                         | 2.64778e-28 | 1.00000 | 2.64778e-28 | 1.00000 |
| PAH8+H                        | 1.67789e-28 | 1.00000 | 1.67789e-28 | 1.00000 |
| rad6                          | 1.26628e-30 | 1.00000 | 1.26628e-30 | 1.00000 |
| rad71                         | 1.66935e-31 | 1.00000 | 1.66935e-31 | 1.00000 |
| rad26                         | 6.64184e-32 | 1.00000 | 6.64184e-32 | 1.00000 |
| rad47                         | 6.30330e-32 | 1.00000 | 6.30330e-32 | 1.00000 |
| rad28                         | 3.51058e-32 | 1.00000 | 3.51058e-32 | 1.00000 |
| rad2                          | 1.17128e-32 | 1.00000 | 1.17128e-32 | 1.00000 |
| rad19anti                     | 8.69987e-33 | 1.00000 | 8.69987e-33 | 1.00000 |
| rad1                          | 7.77042e-34 | 1.00000 | 7.77042e-34 | 1.00000 |
| rad10                         | 6.03334e-34 | 1.00000 | 6.03334e-34 | 1.00000 |
| rad3                          | 9.50464e-35 | 1.00000 | 9.50464e-35 | 1.00000 |
| rad7                          | 9.33133e-35 | 1.00000 | 9.33133e-35 | 1.00000 |
| rad4                          | 4.85923e-35 | 1.00000 | 4.85923e-35 | 1.00000 |
| rad14                         | 2.30257e-35 | 1.00000 | 2.30257e-35 | 1.00000 |
| rad11                         | 2.29772e-35 | 1.00000 | 2.29772e-35 | 1.00000 |
| rad25                         | 1.30583e-35 | 1.00000 | 1.30583e-35 | 1.00000 |
| rad27                         | 2.92485e-36 | 1.00000 | 2.92485e-36 | 1.00000 |
| rad9                          | 2.12092e-36 | 1.00000 | 2.12092e-36 | 1.00000 |
| rad13                         | 5.22016e-37 | 1.00000 | 5.22016e-37 | 1.00000 |
| rad31                         | 7.89258e-38 | 1.00000 | 7.89258e-38 | 1.00000 |
| rad5                          | 1.05109e-38 | 1.00000 | 1.05109e-38 | 1.00000 |
| rad33                         | 1.30161e-39 | 1.00000 | 1.30161e-39 | 1.00000 |
| rad15                         | 9.35538e-40 | 1.00000 | 9.35538e-40 | 1.00000 |
| rad19syn                      | 8.89196e-42 | 1.00000 | 8.89196e-42 | 1.00000 |
| rad20                         | 3.29367e-42 | 1.00000 | 3.29367e-42 | 1.00000 |
| rad21                         | 2.84555e-42 | 1.00000 | 2.84555e-42 | 1.00000 |
| rad12                         | 2.63752e-43 | 1.00000 | 2.63752e-43 | 1.00000 |
| rad23                         | 1.20991e-43 | 1.00000 | 1.20991e-43 | 1.00000 |
| rad18                         | 1.67024e-44 | 1.00000 | 1.67024e-44 | 1.00000 |
| rad45                         | 9.34179e-46 | 1.00000 | 9.34179e-46 | 1.00000 |
| rad22                         | 6.29481e-47 | 1.00000 | 6.29481e-47 | 1.00000 |
| rad36                         | 5.75864e-47 | 1.00000 | 5.75864e-47 | 1.00000 |
| rad24                         | 1.99570e-47 | 1.00000 | 1.99570e-47 | 1.00000 |
| rad8                          | 3.08693e-64 | 1.00000 | 3.08693e-64 | 1.00000 |

0.100000000E-05 Pa, 180.000000 K

| Rate constant | True (fraction)   | Effective (fraction)  |
|---------------|-------------------|-----------------------|
| Total         | 1.12884e-14 (1.00 | ) 1.12884e-14 (1.00 ) |

Formation of rad19 | 1.12881e-14 (1.000 ) 1.12881e-14 (1.000 )  
H-abstraction to cyc2enyl | 2.75916e-19 (2.44e-05) 2.75916e-19 (2.44e-05)  
H-abstraction to cyc1enyl | 2.39955e-23 (2.13e-09) 2.39955e-23 (2.13e-09)

| species                       | PYtrue      | Cumul    | PYeffective | Cumul    |
|-------------------------------|-------------|----------|-------------|----------|
| Indene+H                      | 0.999638    | 0.999638 | 0.999638    | 0.999638 |
| PhCHCCH2+H                    | 0.000320239 | 0.999958 | 0.000320239 | 0.999958 |
| Benzene+cycloprop-2-enylidene | 2.44424e-05 | 0.999982 | 2.44424e-05 | 0.999982 |
| PhCCH+CH3                     | 5.69151e-06 | 0.999988 | 5.69151e-06 | 0.999988 |
| C2H2+PhCH2                    | 4.41182e-06 | 0.999992 | 4.41182e-06 | 0.999992 |
| PhCCCH3+H                     | 3.34271e-06 | 0.999996 | 3.34271e-06 | 0.999996 |
| Ph+MeAc                       | 2.73412e-06 | 0.999998 | 2.73412e-06 | 0.999998 |
| rad67                         | 8.07010e-07 | 0.999999 | 8.07010e-07 | 0.999999 |
| rad35                         | 3.49603e-07 | 1.000000 | 3.49603e-07 | 1.000000 |
| Ph+Allene                     | 2.89684e-07 | 1.000000 | 2.89684e-07 | 1.000000 |
| PhCH2CCH+H                    | 3.99486e-08 | 1.000000 | 3.99486e-08 | 1.000000 |
| PAH7+H                        | 3.42855e-08 | 1.000000 | 3.42855e-08 | 1.000000 |
| rad39                         | 9.67359e-09 | 1.000000 | 9.67359e-09 | 1.000000 |
| rad37                         | 9.25289e-09 | 1.000000 | 9.25289e-09 | 1.000000 |
| rad30                         | 6.63280e-09 | 1.000000 | 6.63280e-09 | 1.000000 |
| Benzene+cycloprop-1-enylidene | 2.12567e-09 | 1.000000 | 2.12567e-09 | 1.000000 |
| PAH9+H                        | 5.06928e-10 | 1.000000 | 5.06928e-10 | 1.000000 |
| rad38                         | 2.29255e-10 | 1.000000 | 2.29255e-10 | 1.000000 |
| rad60syn                      | 3.57046e-11 | 1.000000 | 3.57046e-11 | 1.000000 |
| PAH10+CH3                     | 2.35102e-11 | 1.000000 | 2.35102e-11 | 1.000000 |
| PAH3+H                        | 1.86591e-11 | 1.000000 | 1.86591e-11 | 1.000000 |
| rad60anti                     | 1.77718e-11 | 1.000000 | 1.77718e-11 | 1.000000 |
| rad46                         | 1.45760e-11 | 1.000000 | 1.45760e-11 | 1.000000 |
| PhcycC3H3_A+H                 | 1.01655e-11 | 1.000000 | 1.01655e-11 | 1.000000 |
| rad59                         | 3.71052e-12 | 1.000000 | 3.71052e-12 | 1.000000 |
| rad43                         | 9.19879e-13 | 1.000000 | 9.19879e-13 | 1.000000 |
| rad54                         | 8.60523e-13 | 1.000000 | 8.60523e-13 | 1.000000 |
| rad62                         | 2.04291e-13 | 1.000000 | 2.04291e-13 | 1.000000 |
| rad50                         | 1.42141e-13 | 1.000000 | 1.42141e-13 | 1.000000 |
| Phenyl+cycC3H4                | 8.44565e-14 | 1.000000 | 0.000000    | 1.000000 |
| PhcycC3H3_B+H                 | 2.84776e-14 | 1.000000 | 2.84776e-14 | 1.000000 |
| rad70                         | 2.05555e-14 | 1.000000 | 2.05555e-14 | 1.000000 |
| rad55                         | 9.11579e-15 | 1.000000 | 9.11579e-15 | 1.000000 |
| PAH1+H                        | 7.32394e-15 | 1.000000 | 7.32394e-15 | 1.000000 |
| rad52                         | 1.21498e-15 | 1.000000 | 1.21498e-15 | 1.000000 |
| rad58                         | 5.98636e-16 | 1.000000 | 5.98636e-16 | 1.000000 |
| rad51                         | 4.25485e-16 | 1.000000 | 4.25485e-16 | 1.000000 |
| rad34                         | 4.00857e-16 | 1.000000 | 4.00857e-16 | 1.000000 |
| rad41                         | 8.74643e-17 | 1.000000 | 8.74643e-17 | 1.000000 |
| rad42                         | 6.22157e-17 | 1.000000 | 6.22157e-17 | 1.000000 |
| rad65                         | 9.95948e-18 | 1.000000 | 9.95948e-18 | 1.000000 |
| rad53                         | 3.16150e-19 | 1.000000 | 3.16150e-19 | 1.000000 |
| rad64                         | 5.99926e-20 | 1.000000 | 5.99926e-20 | 1.000000 |
| rad61                         | 4.00801e-21 | 1.000000 | 4.00801e-21 | 1.000000 |
| rad56                         | 1.79227e-22 | 1.000000 | 1.79227e-22 | 1.000000 |
| rad68syn                      | 1.75240e-23 | 1.000000 | 1.75240e-23 | 1.000000 |
| rad68anti                     | 1.37247e-23 | 1.000000 | 1.37247e-23 | 1.000000 |
| rad40syn                      | 3.05803e-26 | 1.000000 | 3.05803e-26 | 1.000000 |
| rad40anti                     | 2.44831e-26 | 1.000000 | 2.44831e-26 | 1.000000 |
| rad73                         | 1.39313e-27 | 1.000000 | 1.39313e-27 | 1.000000 |
| PAH8+H                        | 1.32188e-27 | 1.000000 | 1.32188e-27 | 1.000000 |
| rad71                         | 1.48898e-30 | 1.000000 | 1.48898e-30 | 1.000000 |
| rad6                          | 1.32195e-30 | 1.000000 | 1.32195e-30 | 1.000000 |
| rad47                         | 6.50507e-32 | 1.000000 | 6.50507e-32 | 1.000000 |
| rad26                         | 6.17721e-32 | 1.000000 | 6.17721e-32 | 1.000000 |
| rad28                         | 3.17205e-32 | 1.000000 | 3.17205e-32 | 1.000000 |
| rad19anti                     | 2.31119e-32 | 1.000000 | 2.31119e-32 | 1.000000 |
| rad2                          | 1.86258e-32 | 1.000000 | 1.86258e-32 | 1.000000 |
| rad1                          | 1.24367e-33 | 1.000000 | 1.24367e-33 | 1.000000 |
| rad10                         | 9.58830e-34 | 1.000000 | 9.58830e-34 | 1.000000 |
| rad3                          | 1.46998e-34 | 1.000000 | 1.46998e-34 | 1.000000 |
| rad7                          | 9.76169e-35 | 1.000000 | 9.76169e-35 | 1.000000 |
| rad4                          | 7.52829e-35 | 1.000000 | 7.52829e-35 | 1.000000 |
| rad11                         | 2.40466e-35 | 1.000000 | 2.40466e-35 | 1.000000 |
| rad14                         | 2.31022e-35 | 1.000000 | 2.31022e-35 | 1.000000 |
| rad25                         | 1.33468e-35 | 1.000000 | 1.33468e-35 | 1.000000 |
| rad27                         | 3.02451e-36 | 1.000000 | 3.02451e-36 | 1.000000 |
| rad9                          | 2.72401e-36 | 1.000000 | 2.72401e-36 | 1.000000 |
| rad13                         | 5.46853e-37 | 1.000000 | 5.46853e-37 | 1.000000 |
| rad31                         | 1.69328e-37 | 1.000000 | 1.69328e-37 | 1.000000 |
| rad5                          | 9.83053e-39 | 1.000000 | 9.83053e-39 | 1.000000 |
| rad33                         | 1.39427e-39 | 1.000000 | 1.39427e-39 | 1.000000 |
| rad15                         | 1.20380e-39 | 1.000000 | 1.20380e-39 | 1.000000 |
| rad19syn                      | 2.57212e-41 | 1.000000 | 2.57212e-41 | 1.000000 |



|       |             |          |             |          |
|-------|-------------|----------|-------------|----------|
| rad20 | 3.92576e-42 | 1.000000 | 3.92576e-42 | 1.000000 |
| rad21 | 3.42507e-42 | 1.000000 | 3.42507e-42 | 1.000000 |
| rad12 | 4.06552e-43 | 1.000000 | 4.06552e-43 | 1.000000 |
| rad23 | 3.01615e-43 | 1.000000 | 3.01615e-43 | 1.000000 |
| rad18 | 1.80132e-44 | 1.000000 | 1.80132e-44 | 1.000000 |
| rad45 | 2.40570e-45 | 1.000000 | 2.40570e-45 | 1.000000 |
| rad36 | 1.48605e-46 | 1.000000 | 1.48605e-46 | 1.000000 |
| rad22 | 7.01502e-47 | 1.000000 | 7.01502e-47 | 1.000000 |
| rad24 | 2.79599e-47 | 1.000000 | 2.79599e-47 | 1.000000 |
| rad8  | 4.95694e-64 | 1.000000 | 4.95694e-64 | 1.000000 |

0.100000000E-05 Pa, 190.000000 K

```

=====
Rate constant          | True (fraction)          Effective (fraction)
-----
Total                  | 1.32132e-14 (1.00      ) 1.32132e-14 (1.00      )
Formation of rad19    | 1.32126e-14 (1.000    ) 1.32126e-14 (1.000    )
H-abstraction to cyc2enyl | 5.62053e-19 (4.25e-05) 5.62053e-19 (4.25e-05)
H-abstraction to cyclenyl | 8.18073e-23 (6.19e-09) 8.18073e-23 (6.19e-09)

```

| species                       | PYtrue      | Cumul    | PYeffective | Cumul    |
|-------------------------------|-------------|----------|-------------|----------|
| Indene+H                      | 0.999606    | 0.999606 | 0.999606    | 0.999606 |
| PhCHCCH2+H                    | 0.000332293 | 0.999939 | 0.000332293 | 0.999939 |
| Benzene+cycloprop-2-enylidene | 4.25373e-05 | 0.999981 | 4.25373e-05 | 0.999981 |
| PhCCH+CH3                     | 5.91707e-06 | 0.999987 | 5.91707e-06 | 0.999987 |
| C2H2+PhCH2                    | 4.63023e-06 | 0.999992 | 4.63023e-06 | 0.999992 |
| PhCCCH3+H                     | 3.49167e-06 | 0.999995 | 3.49167e-06 | 0.999995 |
| Ph+MeAc                       | 2.88479e-06 | 0.999998 | 2.88479e-06 | 0.999998 |
| rad67                         | 8.49457e-07 | 0.999999 | 8.49457e-07 | 0.999999 |
| rad35                         | 3.67207e-07 | 0.999999 | 3.67207e-07 | 0.999999 |
| Ph+Allene                     | 3.12197e-07 | 1.000000 | 3.12197e-07 | 1.000000 |
| PhCH2CCH+H                    | 4.36151e-08 | 1.000000 | 4.36151e-08 | 1.000000 |
| PAH7+H                        | 3.65230e-08 | 1.000000 | 3.65230e-08 | 1.000000 |
| rad39                         | 1.03032e-08 | 1.000000 | 1.03032e-08 | 1.000000 |
| rad37                         | 9.89464e-09 | 1.000000 | 9.89464e-09 | 1.000000 |
| rad30                         | 6.98058e-09 | 1.000000 | 6.98058e-09 | 1.000000 |
| Benzene+cycloprop-1-enylidene | 6.19133e-09 | 1.000000 | 6.19133e-09 | 1.000000 |
| PAH9+H                        | 5.42590e-10 | 1.000000 | 5.42590e-10 | 1.000000 |
| rad38                         | 2.47359e-10 | 1.000000 | 2.47359e-10 | 1.000000 |
| rad60syn                      | 3.84183e-11 | 1.000000 | 3.84183e-11 | 1.000000 |
| PAH10+CH3                     | 2.71459e-11 | 1.000000 | 2.71459e-11 | 1.000000 |
| PAH3+H                        | 2.06610e-11 | 1.000000 | 2.06610e-11 | 1.000000 |
| rad60anti                     | 1.91607e-11 | 1.000000 | 1.91607e-11 | 1.000000 |
| rad46                         | 1.58119e-11 | 1.000000 | 1.58119e-11 | 1.000000 |
| PhcycC3H3_A+H                 | 1.33135e-11 | 1.000000 | 1.33135e-11 | 1.000000 |
| rad59                         | 4.08945e-12 | 1.000000 | 4.08945e-12 | 1.000000 |
| rad43                         | 1.04096e-12 | 1.000000 | 1.04096e-12 | 1.000000 |
| rad54                         | 9.92552e-13 | 1.000000 | 9.92552e-13 | 1.000000 |
| rad62                         | 2.31631e-13 | 1.000000 | 2.31631e-13 | 1.000000 |
| rad50                         | 1.60801e-13 | 1.000000 | 1.60801e-13 | 1.000000 |
| Phenyl+cycC3H4                | 1.24603e-13 | 1.000000 | 0.000000    | 1.000000 |
| PhcycC3H3_B+H                 | 5.08976e-14 | 1.000000 | 5.08976e-14 | 1.000000 |
| rad70                         | 2.47658e-14 | 1.000000 | 2.47658e-14 | 1.000000 |
| rad55                         | 1.09840e-14 | 1.000000 | 1.09840e-14 | 1.000000 |
| PAH1+H                        | 9.37357e-15 | 1.000000 | 9.37357e-15 | 1.000000 |
| rad52                         | 1.41930e-15 | 1.000000 | 1.41930e-15 | 1.000000 |
| rad58                         | 7.35874e-16 | 1.000000 | 7.35874e-16 | 1.000000 |
| rad51                         | 5.16512e-16 | 1.000000 | 5.16512e-16 | 1.000000 |
| rad34                         | 5.15048e-16 | 1.000000 | 5.15048e-16 | 1.000000 |
| rad41                         | 1.17041e-16 | 1.000000 | 1.17041e-16 | 1.000000 |
| rad42                         | 8.10502e-17 | 1.000000 | 8.10502e-17 | 1.000000 |
| rad65                         | 1.22862e-17 | 1.000000 | 1.22862e-17 | 1.000000 |
| rad53                         | 5.56219e-19 | 1.000000 | 5.56219e-19 | 1.000000 |
| rad64                         | 1.17042e-19 | 1.000000 | 1.17042e-19 | 1.000000 |
| rad61                         | 1.05588e-20 | 1.000000 | 1.05588e-20 | 1.000000 |
| rad56                         | 5.33231e-22 | 1.000000 | 5.33231e-22 | 1.000000 |
| rad68syn                      | 5.52671e-23 | 1.000000 | 5.52671e-23 | 1.000000 |
| rad68anti                     | 4.30019e-23 | 1.000000 | 4.30019e-23 | 1.000000 |
| rad40syn                      | 1.47212e-25 | 1.000000 | 1.47212e-25 | 1.000000 |
| rad40anti                     | 1.18054e-25 | 1.000000 | 1.18054e-25 | 1.000000 |
| PAH8+H                        | 8.53886e-27 | 1.000000 | 8.53886e-27 | 1.000000 |
| rad73                         | 6.34253e-27 | 1.000000 | 6.34253e-27 | 1.000000 |
| rad71                         | 1.07847e-29 | 1.000000 | 1.07847e-29 | 1.000000 |
| rad6                          | 1.51355e-30 | 1.000000 | 1.51355e-30 | 1.000000 |
| rad47                         | 6.79798e-32 | 1.000000 | 6.79798e-32 | 1.000000 |
| rad19anti                     | 6.45010e-32 | 1.000000 | 6.45010e-32 | 1.000000 |
| rad26                         | 5.82049e-32 | 1.000000 | 5.82049e-32 | 1.000000 |
| rad2                          | 3.08087e-32 | 1.000000 | 3.08087e-32 | 1.000000 |
| rad28                         | 2.90107e-32 | 1.000000 | 2.90107e-32 | 1.000000 |

|          |             |          |             |          |
|----------|-------------|----------|-------------|----------|
| rad1     | 2.07165e-33 | 1.000000 | 2.07165e-33 | 1.000000 |
| rad10    | 1.59388e-33 | 1.000000 | 1.59388e-33 | 1.000000 |
| rad3     | 2.37353e-34 | 1.000000 | 2.37353e-34 | 1.000000 |
| rad4     | 1.21788e-34 | 1.000000 | 1.21788e-34 | 1.000000 |
| rad7     | 1.12004e-34 | 1.000000 | 1.12004e-34 | 1.000000 |
| rad11    | 2.75976e-35 | 1.000000 | 2.75976e-35 | 1.000000 |
| rad14    | 2.33264e-35 | 1.000000 | 2.33264e-35 | 1.000000 |
| rad25    | 1.37338e-35 | 1.000000 | 1.37338e-35 | 1.000000 |
| rad9     | 3.58081e-36 | 1.000000 | 3.58081e-36 | 1.000000 |
| rad27    | 3.15136e-36 | 1.000000 | 3.15136e-36 | 1.000000 |
| rad13    | 6.28364e-37 | 1.000000 | 6.28364e-37 | 1.000000 |
| rad31    | 3.79750e-37 | 1.000000 | 3.79750e-37 | 1.000000 |
| rad5     | 9.24034e-39 | 1.000000 | 9.24034e-39 | 1.000000 |
| rad33    | 1.60610e-39 | 1.000000 | 1.60610e-39 | 1.000000 |
| rad15    | 1.58550e-39 | 1.000000 | 1.58550e-39 | 1.000000 |
| rad19syn | 7.83212e-41 | 1.000000 | 7.83212e-41 | 1.000000 |
| rad20    | 4.73717e-42 | 1.000000 | 4.73717e-42 | 1.000000 |
| rad21    | 4.17589e-42 | 1.000000 | 4.17589e-42 | 1.000000 |
| rad23    | 8.23178e-43 | 1.000000 | 8.23178e-43 | 1.000000 |
| rad12    | 6.43102e-43 | 1.000000 | 6.43102e-43 | 1.000000 |
| rad18    | 1.95694e-44 | 1.000000 | 1.95694e-44 | 1.000000 |
| rad45    | 6.85912e-45 | 1.000000 | 6.85912e-45 | 1.000000 |
| rad36    | 4.24734e-46 | 1.000000 | 4.24734e-46 | 1.000000 |
| rad22    | 8.80828e-47 | 1.000000 | 8.80828e-47 | 1.000000 |
| rad24    | 3.99396e-47 | 1.000000 | 3.99396e-47 | 1.000000 |
| rad8     | 8.12779e-64 | 1.000000 | 8.12779e-64 | 1.000000 |

0.100000000E-05 Pa, 200.00000 K

=====

| Rate constant             | True (fraction)        | Effective (fraction)   |
|---------------------------|------------------------|------------------------|
| Total                     | 1.52621e-14 (1.00 )    | 1.52621e-14 (1.00 )    |
| Formation of rad19        | 1.52610e-14 (1.000 )   | 1.52610e-14 (1.000 )   |
| H-abstraction to cyc2enyl | 1.06427e-18 (6.97e-05) | 1.06427e-18 (6.97e-05) |
| H-abstraction to cyc1enyl | 2.46309e-22 (1.61e-08) | 2.46309e-22 (1.61e-08) |

| species                       | PYtrue      | Cumul     | PYeffective | Cumul     |
|-------------------------------|-------------|-----------|-------------|-----------|
| Indene+H                      | 0.9999565   | 0.9999565 | 0.9999565   | 0.9999565 |
| PhCHCCH2+H                    | 0.000345433 | 0.999911  | 0.000345433 | 0.999911  |
| Benzene+cycloprop-2-enylidene | 6.97330e-05 | 0.999980  | 6.97330e-05 | 0.999980  |
| PhCCH+CH3                     | 6.16243e-06 | 0.999987  | 6.16243e-06 | 0.999987  |
| C2H2+PhCH2                    | 4.87109e-06 | 0.999991  | 4.87109e-06 | 0.999991  |
| PhCCCH3+H                     | 3.65492e-06 | 0.999995  | 3.65492e-06 | 0.999995  |
| Ph+MeAc                       | 3.05169e-06 | 0.999998  | 3.05169e-06 | 0.999998  |
| rad67                         | 8.96414e-07 | 0.999999  | 8.96414e-07 | 0.999999  |
| rad35                         | 3.86641e-07 | 0.999999  | 3.86641e-07 | 0.999999  |
| Ph+Allene                     | 3.37776e-07 | 1.000000  | 3.37776e-07 | 1.000000  |
| PhCH2CCH+H                    | 4.78388e-08 | 1.000000  | 4.78388e-08 | 1.000000  |
| PAH7+H                        | 3.90324e-08 | 1.000000  | 3.90324e-08 | 1.000000  |
| Benzene+cycloprop-1-enylidene | 1.61386e-08 | 1.000000  | 1.61386e-08 | 1.000000  |
| rad39                         | 1.10085e-08 | 1.000000  | 1.10085e-08 | 1.000000  |
| rad37                         | 1.06172e-08 | 1.000000  | 1.06172e-08 | 1.000000  |
| rad30                         | 7.36603e-09 | 1.000000  | 7.36603e-09 | 1.000000  |
| PAH9+H                        | 5.82902e-10 | 1.000000  | 5.82902e-10 | 1.000000  |
| rad38                         | 2.68036e-10 | 1.000000  | 2.68036e-10 | 1.000000  |
| rad60syn                      | 4.15004e-11 | 1.000000  | 4.15004e-11 | 1.000000  |
| PAH10+CH3                     | 3.15724e-11 | 1.000000  | 3.15724e-11 | 1.000000  |
| PAH3+H                        | 2.30055e-11 | 1.000000  | 2.30055e-11 | 1.000000  |
| rad60anti                     | 2.07416e-11 | 1.000000  | 2.07416e-11 | 1.000000  |
| PhcycC3H3_A+H                 | 1.75314e-11 | 1.000000  | 1.75314e-11 | 1.000000  |
| rad46                         | 1.72300e-11 | 1.000000  | 1.72300e-11 | 1.000000  |
| rad59                         | 4.53088e-12 | 1.000000  | 4.53088e-12 | 1.000000  |
| rad43                         | 1.18504e-12 | 1.000000  | 1.18504e-12 | 1.000000  |
| rad54                         | 1.15325e-12 | 1.000000  | 1.15325e-12 | 1.000000  |
| rad62                         | 2.64143e-13 | 1.000000  | 2.64143e-13 | 1.000000  |
| Phenyl+cycC3H4                | 1.83626e-13 | 1.000000  | 0.00000     | 1.000000  |
| rad50                         | 1.83198e-13 | 1.000000  | 1.83198e-13 | 1.000000  |
| PhcycC3H3_B+H                 | 8.87690e-14 | 1.000000  | 8.87690e-14 | 1.000000  |
| rad70                         | 3.01009e-14 | 1.000000  | 3.01009e-14 | 1.000000  |
| rad55                         | 1.33496e-14 | 1.000000  | 1.33496e-14 | 1.000000  |
| PAH1+H                        | 1.21077e-14 | 1.000000  | 1.21077e-14 | 1.000000  |
| rad52                         | 1.67258e-15 | 1.000000  | 1.67258e-15 | 1.000000  |
| rad58                         | 9.13220e-16 | 1.000000  | 9.13220e-16 | 1.000000  |
| rad34                         | 6.67958e-16 | 1.000000  | 6.67958e-16 | 1.000000  |
| rad51                         | 6.33617e-16 | 1.000000  | 6.33617e-16 | 1.000000  |
| rad41                         | 1.57585e-16 | 1.000000  | 1.57585e-16 | 1.000000  |
| rad42                         | 1.06227e-16 | 1.000000  | 1.06227e-16 | 1.000000  |
| rad65                         | 1.53192e-17 | 1.000000  | 1.53192e-17 | 1.000000  |
| rad53                         | 9.61974e-19 | 1.000000  | 9.61974e-19 | 1.000000  |

|           |             |          |             |          |
|-----------|-------------|----------|-------------|----------|
| rad64     | 2.21495e-19 | 1.000000 | 2.21495e-19 | 1.000000 |
| rad61     | 2.60103e-20 | 1.000000 | 2.60103e-20 | 1.000000 |
| rad56     | 1.46279e-21 | 1.000000 | 1.46279e-21 | 1.000000 |
| rad68syn  | 1.59261e-22 | 1.000000 | 1.59261e-22 | 1.000000 |
| rad68anti | 1.23075e-22 | 1.000000 | 1.23075e-22 | 1.000000 |
| rad40syn  | 6.17076e-25 | 1.000000 | 6.17076e-25 | 1.000000 |
| rad40anti | 4.95189e-25 | 1.000000 | 4.95189e-25 | 1.000000 |
| PAH8+H    | 4.65852e-26 | 1.000000 | 4.65852e-26 | 1.000000 |
| rad73     | 2.55582e-26 | 1.000000 | 2.55582e-26 | 1.000000 |
| rad71     | 6.53613e-29 | 1.000000 | 6.53613e-29 | 1.000000 |
| rad6      | 1.93402e-30 | 1.000000 | 1.93402e-30 | 1.000000 |
| rad19anti | 1.88664e-31 | 1.000000 | 1.88664e-31 | 1.000000 |
| rad47     | 7.19639e-32 | 1.000000 | 7.19639e-32 | 1.000000 |
| rad26     | 5.58288e-32 | 1.000000 | 5.58288e-32 | 1.000000 |
| rad2      | 5.38376e-32 | 1.000000 | 5.38376e-32 | 1.000000 |
| rad28     | 2.69607e-32 | 1.000000 | 2.69607e-32 | 1.000000 |
| rad1      | 3.64795e-33 | 1.000000 | 3.64795e-33 | 1.000000 |
| rad10     | 2.77810e-33 | 1.000000 | 2.77810e-33 | 1.000000 |
| rad3      | 3.99073e-34 | 1.000000 | 3.99073e-34 | 1.000000 |
| rad4      | 2.05194e-34 | 1.000000 | 2.05194e-34 | 1.000000 |
| rad7      | 1.43433e-34 | 1.000000 | 1.43433e-34 | 1.000000 |
| rad11     | 3.53457e-35 | 1.000000 | 3.53457e-35 | 1.000000 |
| rad14     | 2.36947e-35 | 1.000000 | 2.36947e-35 | 1.000000 |
| rad25     | 1.42225e-35 | 1.000000 | 1.42225e-35 | 1.000000 |
| rad9      | 4.81694e-36 | 1.000000 | 4.81694e-36 | 1.000000 |
| rad27     | 3.30807e-36 | 1.000000 | 3.30807e-36 | 1.000000 |
| rad31     | 8.89669e-37 | 1.000000 | 8.89669e-37 | 1.000000 |
| rad13     | 8.05923e-37 | 1.000000 | 8.05923e-37 | 1.000000 |
| rad5      | 8.72332e-39 | 1.000000 | 8.72332e-39 | 1.000000 |
| rad15     | 2.13709e-39 | 1.000000 | 2.13709e-39 | 1.000000 |
| rad33     | 2.01589e-39 | 1.000000 | 2.01589e-39 | 1.000000 |
| rad19syn  | 2.51002e-40 | 1.000000 | 2.51002e-40 | 1.000000 |
| rad20     | 5.78604e-42 | 1.000000 | 5.78604e-42 | 1.000000 |
| rad21     | 5.15628e-42 | 1.000000 | 5.15628e-42 | 1.000000 |
| rad23     | 2.45956e-42 | 1.000000 | 2.45956e-42 | 1.000000 |
| rad12     | 1.04399e-42 | 1.000000 | 1.04399e-42 | 1.000000 |
| rad45     | 2.14897e-44 | 1.000000 | 2.14897e-44 | 1.000000 |
| rad18     | 2.14088e-44 | 1.000000 | 2.14088e-44 | 1.000000 |
| rad36     | 1.33446e-45 | 1.000000 | 1.33446e-45 | 1.000000 |
| rad22     | 1.36726e-46 | 1.000000 | 1.36726e-46 | 1.000000 |
| rad24     | 5.81724e-47 | 1.000000 | 5.81724e-47 | 1.000000 |
| rad8      | 1.36072e-63 | 1.000000 | 1.36072e-63 | 1.000000 |

0.100000000E-05 Pa, 210.000000 K

| Rate constant             | True (fraction)        | Effective (fraction)   |
|---------------------------|------------------------|------------------------|
| Total                     | 1.74272e-14 (1.00 )    | 1.74272e-14 (1.00 )    |
| Formation of rad19        | 1.74253e-14 (1.000 )   | 1.74253e-14 (1.000 )   |
| H-abstraction to cyc2enyl | 1.89310e-18 (0.000109) | 1.89310e-18 (0.000109) |
| H-abstraction to cyclenyl | 6.66714e-22 (3.83e-08) | 6.66714e-22 (3.83e-08) |

| species                       | PYtrue      | Cumul    | PYeffective | Cumul    |
|-------------------------------|-------------|----------|-------------|----------|
| Indene+H                      | 0.999511    | 0.999511 | 0.999511    | 0.999511 |
| PhCHCCH2+H                    | 0.000359771 | 0.999871 | 0.000359771 | 0.999871 |
| Benzene+cycloprop-2-enylidene | 0.000108629 | 0.999980 | 0.000108629 | 0.999980 |
| PhCCH+CH3                     | 6.42954e-06 | 0.999986 | 6.42954e-06 | 0.999986 |
| C2H2+PhCH2                    | 5.13705e-06 | 0.999991 | 5.13705e-06 | 0.999991 |
| PhCCCH3+H                     | 3.83397e-06 | 0.999995 | 3.83397e-06 | 0.999995 |
| Ph+MeAc                       | 3.23682e-06 | 0.999998 | 3.23682e-06 | 0.999998 |
| rad67                         | 9.48433e-07 | 0.999999 | 9.48433e-07 | 0.999999 |
| rad35                         | 4.08123e-07 | 1.000000 | 4.08123e-07 | 1.000000 |
| Ph+Allene                     | 3.66908e-07 | 1.000000 | 3.66908e-07 | 1.000000 |
| PhCH2CCH+H                    | 5.27181e-08 | 1.000000 | 5.27181e-08 | 1.000000 |
| PAH7+H                        | 4.18517e-08 | 1.000000 | 4.18517e-08 | 1.000000 |
| Benzene+cycloprop-1-enylidene | 3.82571e-08 | 1.000000 | 3.82571e-08 | 1.000000 |
| rad39                         | 1.18003e-08 | 1.000000 | 1.18003e-08 | 1.000000 |
| rad37                         | 1.14322e-08 | 1.000000 | 1.14322e-08 | 1.000000 |
| rad30                         | 7.79386e-09 | 1.000000 | 7.79386e-09 | 1.000000 |
| PAH9+H                        | 6.28582e-10 | 1.000000 | 6.28582e-10 | 1.000000 |
| rad38                         | 2.91718e-10 | 1.000000 | 2.91718e-10 | 1.000000 |
| rad60syn                      | 4.50097e-11 | 1.000000 | 4.50097e-11 | 1.000000 |
| PAH10+CH3                     | 3.69848e-11 | 1.000000 | 3.69848e-11 | 1.000000 |
| PAH3+H                        | 2.57613e-11 | 1.000000 | 2.57613e-11 | 1.000000 |
| PhcycC3H3_A+H                 | 2.31914e-11 | 1.000000 | 2.31914e-11 | 1.000000 |
| rad60anti                     | 2.25454e-11 | 1.000000 | 2.25454e-11 | 1.000000 |
| rad46                         | 1.88621e-11 | 1.000000 | 1.88621e-11 | 1.000000 |
| rad59                         | 5.04687e-12 | 1.000000 | 5.04687e-12 | 1.000000 |
| rad43                         | 1.35708e-12 | 1.000000 | 1.35708e-12 | 1.000000 |

|                |             |         |             |         |
|----------------|-------------|---------|-------------|---------|
| rad54          | 1.34969e-12 | 1.00000 | 1.34969e-12 | 1.00000 |
| rad62          | 3.02922e-13 | 1.00000 | 3.02922e-13 | 1.00000 |
| Phenyl+cycC3H4 | 2.70226e-13 | 1.00000 | 0.00000     | 1.00000 |
| rad50          | 2.10210e-13 | 1.00000 | 2.10210e-13 | 1.00000 |
| PhcycC3H3_B+H  | 1.51586e-13 | 1.00000 | 1.51586e-13 | 1.00000 |
| rad70          | 3.68946e-14 | 1.00000 | 3.68946e-14 | 1.00000 |
| rad55          | 1.63588e-14 | 1.00000 | 1.63588e-14 | 1.00000 |
| PAH1+H         | 1.57712e-14 | 1.00000 | 1.57712e-14 | 1.00000 |
| rad52          | 1.98838e-15 | 1.00000 | 1.98838e-15 | 1.00000 |
| rad58          | 1.14364e-15 | 1.00000 | 1.14364e-15 | 1.00000 |
| rad34          | 8.73664e-16 | 1.00000 | 8.73664e-16 | 1.00000 |
| rad51          | 7.85267e-16 | 1.00000 | 7.85267e-16 | 1.00000 |
| rad41          | 2.13280e-16 | 1.00000 | 2.13280e-16 | 1.00000 |
| rad42          | 1.39947e-16 | 1.00000 | 1.39947e-16 | 1.00000 |
| rad65          | 1.92990e-17 | 1.00000 | 1.92990e-17 | 1.00000 |
| rad53          | 1.63950e-18 | 1.00000 | 1.63950e-18 | 1.00000 |
| rad64          | 4.08414e-19 | 1.00000 | 4.08414e-19 | 1.00000 |
| rad61          | 6.05363e-20 | 1.00000 | 6.05363e-20 | 1.00000 |
| rad56          | 3.74745e-21 | 1.00000 | 3.74745e-21 | 1.00000 |
| rad68syn       | 4.25367e-22 | 1.00000 | 4.25367e-22 | 1.00000 |
| rad68anti      | 3.26442e-22 | 1.00000 | 3.26442e-22 | 1.00000 |
| rad40syn       | 2.29907e-24 | 1.00000 | 2.29907e-24 | 1.00000 |
| rad40anti      | 1.84461e-24 | 1.00000 | 1.84461e-24 | 1.00000 |
| PAH8+H         | 2.19678e-25 | 1.00000 | 2.19678e-25 | 1.00000 |
| rad73          | 9.27903e-26 | 1.00000 | 9.27903e-26 | 1.00000 |
| rad71          | 3.39170e-28 | 1.00000 | 3.39170e-28 | 1.00000 |
| rad6           | 2.78636e-30 | 1.00000 | 2.78636e-30 | 1.00000 |
| rad19anti      | 5.76791e-31 | 1.00000 | 5.76791e-31 | 1.00000 |
| rad2           | 9.80943e-32 | 1.00000 | 9.80943e-32 | 1.00000 |
| rad47          | 7.72082e-32 | 1.00000 | 7.72082e-32 | 1.00000 |
| rad26          | 5.49770e-32 | 1.00000 | 5.49770e-32 | 1.00000 |
| rad28          | 2.56592e-32 | 1.00000 | 2.56592e-32 | 1.00000 |
| rad1           | 6.70209e-33 | 1.00000 | 6.70209e-33 | 1.00000 |
| rad10          | 5.06021e-33 | 1.00000 | 5.06021e-33 | 1.00000 |
| rad3           | 6.93175e-34 | 1.00000 | 6.93175e-34 | 1.00000 |
| rad4           | 3.57224e-34 | 1.00000 | 3.57224e-34 | 1.00000 |
| rad7           | 2.07114e-34 | 1.00000 | 2.07114e-34 | 1.00000 |
| rad11          | 5.10395e-35 | 1.00000 | 5.10395e-35 | 1.00000 |
| rad14          | 2.42097e-35 | 1.00000 | 2.42097e-35 | 1.00000 |
| rad25          | 1.48191e-35 | 1.00000 | 1.48191e-35 | 1.00000 |
| rad9           | 6.63394e-36 | 1.00000 | 6.63394e-36 | 1.00000 |
| rad27          | 3.49888e-36 | 1.00000 | 3.49888e-36 | 1.00000 |
| rad31          | 2.17526e-36 | 1.00000 | 2.17526e-36 | 1.00000 |
| rad13          | 1.16560e-36 | 1.00000 | 1.16560e-36 | 1.00000 |
| rad5           | 8.26645e-39 | 1.00000 | 8.26645e-39 | 1.00000 |
| rad15          | 2.94931e-39 | 1.00000 | 2.94931e-39 | 1.00000 |
| rad33          | 2.79345e-39 | 1.00000 | 2.79345e-39 | 1.00000 |
| rad19syn       | 8.46110e-40 | 1.00000 | 8.46110e-40 | 1.00000 |
| rad23          | 8.03158e-42 | 1.00000 | 8.03158e-42 | 1.00000 |
| rad20          | 7.15315e-42 | 1.00000 | 7.15315e-42 | 1.00000 |
| rad21          | 6.44791e-42 | 1.00000 | 6.44791e-42 | 1.00000 |
| rad12          | 1.73960e-42 | 1.00000 | 1.73960e-42 | 1.00000 |
| rad45          | 7.41897e-44 | 1.00000 | 7.41897e-44 | 1.00000 |
| rad18          | 2.35810e-44 | 1.00000 | 2.35810e-44 | 1.00000 |
| rad36          | 4.62194e-45 | 1.00000 | 4.62194e-45 | 1.00000 |
| rad22          | 2.81326e-46 | 1.00000 | 2.81326e-46 | 1.00000 |
| rad24          | 8.64062e-47 | 1.00000 | 8.64062e-47 | 1.00000 |
| rad8           | 2.32606e-63 | 1.00000 | 2.32606e-63 | 1.00000 |

0.100000000E-05 Pa, 220.000000 K

| Rate constant             | True (fraction)        | Effective (fraction)   |
|---------------------------|------------------------|------------------------|
| Total                     | 1.97009e-14 (1.00 )    | 1.97009e-14 (1.00 )    |
| Formation of rad19        | 1.96977e-14 (1.000 )   | 1.96977e-14 (1.000 )   |
| H-abstraction to cyc2enyl | 3.19064e-18 (0.000162) | 3.19064e-18 (0.000162) |
| H-abstraction to cyc1enyl | 1.64627e-21 (8.36e-08) | 1.64627e-21 (8.36e-08) |

| species                       | PYtrue      | Cumul    | PYeffective | Cumul    |
|-------------------------------|-------------|----------|-------------|----------|
| Indene+H                      | 0.999441    | 0.999441 | 0.999441    | 0.999441 |
| PhCHCCH2+H                    | 0.000375424 | 0.999816 | 0.000375424 | 0.999816 |
| Benzene+cycloprop-2-enylidene | 0.000161954 | 0.999978 | 0.000161954 | 0.999978 |
| PhCCH+CH3                     | 6.72039e-06 | 0.999985 | 6.72039e-06 | 0.999985 |
| C2H2+PhCH2                    | 5.43098e-06 | 0.999991 | 5.43098e-06 | 0.999991 |
| PhCCCH3+H                     | 4.03052e-06 | 0.999995 | 4.03052e-06 | 0.999995 |
| Ph+MeAc                       | 3.44236e-06 | 0.999998 | 3.44236e-06 | 0.999998 |
| rad67                         | 1.00612e-06 | 0.999999 | 1.00612e-06 | 0.999999 |
| rad35                         | 4.31892e-07 | 0.999999 | 4.31892e-07 | 0.999999 |
| Ph+Allene                     | 4.00152e-07 | 1.000000 | 4.00152e-07 | 1.000000 |

|                               |             |          |             |          |
|-------------------------------|-------------|----------|-------------|----------|
| Benzene+cycloprop-1-enylidene | 8.35632e-08 | 1.000000 | 8.35632e-08 | 1.000000 |
| PhCH2CCH+H                    | 5.83685e-08 | 1.00000  | 5.83685e-08 | 1.00000  |
| PAH7+H                        | 4.50238e-08 | 1.00000  | 4.50238e-08 | 1.00000  |
| rad39                         | 1.26902e-08 | 1.00000  | 1.26902e-08 | 1.00000  |
| rad37                         | 1.23532e-08 | 1.00000  | 1.23532e-08 | 1.00000  |
| rad30                         | 8.26934e-09 | 1.00000  | 8.26934e-09 | 1.00000  |
| PAH9+H                        | 6.80449e-10 | 1.00000  | 6.80449e-10 | 1.00000  |
| rad38                         | 3.18912e-10 | 1.00000  | 3.18912e-10 | 1.00000  |
| rad60syn                      | 4.90141e-11 | 1.00000  | 4.90141e-11 | 1.00000  |
| PAH10+CH3                     | 4.36275e-11 | 1.00000  | 4.36275e-11 | 1.00000  |
| PhcycC3H3_A+H                 | 3.07931e-11 | 1.00000  | 3.07931e-11 | 1.00000  |
| PAH3+H                        | 2.90111e-11 | 1.00000  | 2.90111e-11 | 1.00000  |
| rad60anti                     | 2.46085e-11 | 1.00000  | 2.46085e-11 | 1.00000  |
| rad46                         | 2.07451e-11 | 1.00000  | 2.07451e-11 | 1.00000  |
| rad59                         | 5.65179e-12 | 1.00000  | 5.65179e-12 | 1.00000  |
| rad54                         | 1.59075e-12 | 1.00000  | 1.59075e-12 | 1.00000  |
| rad43                         | 1.56310e-12 | 1.00000  | 1.56310e-12 | 1.00000  |
| Phenyl+cycC3H4                | 3.96956e-13 | 1.00000  | 0.00000     | 1.00000  |
| rad62                         | 3.49289e-13 | 1.00000  | 3.49289e-13 | 1.00000  |
| PhcycC3H3_B+H                 | 2.54101e-13 | 1.00000  | 2.54101e-13 | 1.00000  |
| rad50                         | 2.42929e-13 | 1.00000  | 2.42929e-13 | 1.00000  |
| rad70                         | 4.55816e-14 | 1.00000  | 4.55816e-14 | 1.00000  |
| PAH1+H                        | 2.06978e-14 | 1.00000  | 2.06978e-14 | 1.00000  |
| rad55                         | 2.02024e-14 | 1.00000  | 2.02024e-14 | 1.00000  |
| rad52                         | 2.38419e-15 | 1.00000  | 2.38419e-15 | 1.00000  |
| rad58                         | 1.44438e-15 | 1.00000  | 1.44438e-15 | 1.00000  |
| rad34                         | 1.15142e-15 | 1.00000  | 1.15142e-15 | 1.00000  |
| rad51                         | 9.82815e-16 | 1.00000  | 9.82815e-16 | 1.00000  |
| rad41                         | 2.89888e-16 | 1.00000  | 2.89888e-16 | 1.00000  |
| rad42                         | 1.85167e-16 | 1.00000  | 1.85167e-16 | 1.00000  |
| rad65                         | 2.45506e-17 | 1.00000  | 2.45506e-17 | 1.00000  |
| rad53                         | 2.75830e-18 | 1.00000  | 2.75830e-18 | 1.00000  |
| rad64                         | 7.36243e-19 | 1.00000  | 7.36243e-19 | 1.00000  |
| rad61                         | 1.34204e-19 | 1.00000  | 1.34204e-19 | 1.00000  |
| rad56                         | 9.05590e-21 | 1.00000  | 9.05590e-21 | 1.00000  |
| rad68syn                      | 1.06496e-21 | 1.00000  | 1.06496e-21 | 1.00000  |
| rad68anti                     | 8.11646e-22 | 1.00000  | 8.11646e-22 | 1.00000  |
| rad40syn                      | 7.73817e-24 | 1.00000  | 7.73817e-24 | 1.00000  |
| rad40anti                     | 6.20298e-24 | 1.00000  | 6.20298e-24 | 1.00000  |
| PAH8+H                        | 9.11871e-25 | 1.00000  | 9.11871e-25 | 1.00000  |
| rad73                         | 3.07722e-25 | 1.00000  | 3.07722e-25 | 1.00000  |
| rad71                         | 1.53452e-27 | 1.00000  | 1.53452e-27 | 1.00000  |
| rad6                          | 4.54111e-30 | 1.00000  | 4.54111e-30 | 1.00000  |
| rad19anti                     | 1.83731e-30 | 1.00000  | 1.83731e-30 | 1.00000  |
| rad2                          | 1.85636e-31 | 1.00000  | 1.85636e-31 | 1.00000  |
| rad47                         | 8.39990e-32 | 1.00000  | 8.39990e-32 | 1.00000  |
| rad26                         | 5.63625e-32 | 1.00000  | 5.63625e-32 | 1.00000  |
| rad28                         | 2.53729e-32 | 1.00000  | 2.53729e-32 | 1.00000  |
| rad1                          | 1.27978e-32 | 1.00000  | 1.27978e-32 | 1.00000  |
| rad10                         | 9.59500e-33 | 1.00000  | 9.59500e-33 | 1.00000  |
| rad3                          | 1.25737e-33 | 1.00000  | 1.25737e-33 | 1.00000  |
| rad4                          | 6.49586e-34 | 1.00000  | 6.49586e-34 | 1.00000  |
| rad7                          | 3.38334e-34 | 1.00000  | 3.38334e-34 | 1.00000  |
| rad11                         | 8.33741e-35 | 1.00000  | 8.33741e-35 | 1.00000  |
| rad14                         | 2.48797e-35 | 1.00000  | 2.48797e-35 | 1.00000  |
| rad25                         | 1.55327e-35 | 1.00000  | 1.55327e-35 | 1.00000  |
| rad9                          | 9.36809e-36 | 1.00000  | 9.36809e-36 | 1.00000  |
| rad31                         | 5.54362e-36 | 1.00000  | 5.54362e-36 | 1.00000  |
| rad27                         | 3.73045e-36 | 1.00000  | 3.73045e-36 | 1.00000  |
| rad13                         | 1.90730e-36 | 1.00000  | 1.90730e-36 | 1.00000  |
| rad5                          | 7.85961e-39 | 1.00000  | 7.85961e-39 | 1.00000  |
| rad33                         | 4.32948e-39 | 1.00000  | 4.32948e-39 | 1.00000  |
| rad15                         | 4.17377e-39 | 1.00000  | 4.17377e-39 | 1.00000  |
| rad19syn                      | 2.99699e-39 | 1.00000  | 2.99699e-39 | 1.00000  |
| rad23                         | 2.85667e-41 | 1.00000  | 2.85667e-41 | 1.00000  |
| rad20                         | 8.95220e-42 | 1.00000  | 8.95220e-42 | 1.00000  |
| rad21                         | 8.16695e-42 | 1.00000  | 8.16695e-42 | 1.00000  |
| rad12                         | 2.97630e-42 | 1.00000  | 2.97630e-42 | 1.00000  |
| rad45                         | 2.81069e-43 | 1.00000  | 2.81069e-43 | 1.00000  |
| rad18                         | 2.61543e-44 | 1.00000  | 2.61543e-44 | 1.00000  |
| rad36                         | 1.75752e-44 | 1.00000  | 1.75752e-44 | 1.00000  |
| rad22                         | 7.49135e-46 | 1.00000  | 7.49135e-46 | 1.00000  |
| rad24                         | 1.30920e-46 | 1.00000  | 1.30920e-46 | 1.00000  |
| rad8                          | 4.06073e-63 | 1.00000  | 4.06073e-63 | 1.00000  |

0.100000000E-05 Pa, 230.000000 K

| Rate constant | True (fraction)   | Effective (fraction)  |
|---------------|-------------------|-----------------------|
| Total         | 2.20761e-14 (1.00 | ) 2.20761e-14 (1.00 ) |

Formation of rad19 | 2.20710e-14 (1.000 ) 2.20710e-14 (1.000 )  
H-abstraction to cyc2enyl | 5.13155e-18 (0.000232) 5.13155e-18 (0.000232)  
H-abstraction to cyclenyl | 3.75316e-21 (1.70e-07) 3.75316e-21 (1.70e-07)

| species                       | PYtrue      | Cumul    | PYeffective | Cumul    |
|-------------------------------|-------------|----------|-------------|----------|
| Indene+H                      | 0.999352    | 0.999352 | 0.999352    | 0.999352 |
| PhCHCCH2+H                    | 0.000392520 | 0.999745 | 0.000392520 | 0.999745 |
| Benzene+cycloprop-2-enylidene | 0.000232448 | 0.999977 | 0.000232448 | 0.999977 |
| PhCCH+CH3                     | 7.03712e-06 | 0.999984 | 7.03712e-06 | 0.999984 |
| C2H2+PhCH2                    | 5.75601e-06 | 0.999990 | 5.75601e-06 | 0.999990 |
| PhCCCH3+H                     | 4.24633e-06 | 0.999994 | 4.24633e-06 | 0.999994 |
| Ph+MeAc                       | 3.67074e-06 | 0.999998 | 3.67074e-06 | 0.999998 |
| rad67                         | 1.07014e-06 | 0.999999 | 1.07014e-06 | 0.999999 |
| rad35                         | 4.58209e-07 | 1.000000 | 4.58209e-07 | 1.000000 |
| Ph+Allene                     | 4.38150e-07 | 1.000000 | 4.38150e-07 | 1.000000 |
| Benzene+cycloprop-1-enylidene | 1.70010e-07 | 1.000000 | 1.70010e-07 | 1.000000 |
| PhCH2CCH+H                    | 6.49255e-08 | 1.000000 | 6.49255e-08 | 1.000000 |
| PAH7+H                        | 4.85973e-08 | 1.000000 | 4.85973e-08 | 1.000000 |
| rad39                         | 1.36916e-08 | 1.000000 | 1.36916e-08 | 1.000000 |
| rad37                         | 1.33953e-08 | 1.000000 | 1.33953e-08 | 1.000000 |
| rad30                         | 8.79825e-09 | 1.000000 | 8.79825e-09 | 1.000000 |
| PAH9+H                        | 7.39444e-10 | 1.000000 | 7.39444e-10 | 1.000000 |
| rad38                         | 3.50209e-10 | 1.000000 | 3.50209e-10 | 1.000000 |
| rad60syn                      | 5.35915e-11 | 1.000000 | 5.35915e-11 | 1.000000 |
| PAH10+CH3                     | 5.18070e-11 | 1.000000 | 5.18070e-11 | 1.000000 |
| PhcycC3H3_A+H                 | 4.10038e-11 | 1.000000 | 4.10038e-11 | 1.000000 |
| PAH3+H                        | 3.28545e-11 | 1.000000 | 3.28545e-11 | 1.000000 |
| rad60anti                     | 2.69725e-11 | 1.000000 | 2.69725e-11 | 1.000000 |
| rad46                         | 2.29232e-11 | 1.000000 | 2.29232e-11 | 1.000000 |
| rad59                         | 6.36289e-12 | 1.000000 | 6.36289e-12 | 1.000000 |
| rad54                         | 1.88753e-12 | 1.000000 | 1.88753e-12 | 1.000000 |
| rad43                         | 1.81040e-12 | 1.000000 | 1.81040e-12 | 1.000000 |
| Phenyl+cycC3H4                | 5.81829e-13 | 1.000000 | 0.000000    | 1.000000 |
| PhcycC3H3_B+H                 | 4.18958e-13 | 1.000000 | 4.18958e-13 | 1.000000 |
| rad62                         | 4.04844e-13 | 1.000000 | 4.04844e-13 | 1.000000 |
| rad50                         | 2.82714e-13 | 1.000000 | 2.82714e-13 | 1.000000 |
| rad70                         | 5.67286e-14 | 1.000000 | 5.67286e-14 | 1.000000 |
| PAH1+H                        | 2.73412e-14 | 1.000000 | 2.73412e-14 | 1.000000 |
| rad55                         | 2.51284e-14 | 1.000000 | 2.51284e-14 | 1.000000 |
| rad52                         | 2.88263e-15 | 1.000000 | 2.88263e-15 | 1.000000 |
| rad58                         | 1.83842e-15 | 1.000000 | 1.83842e-15 | 1.000000 |
| rad34                         | 1.52752e-15 | 1.000000 | 1.52752e-15 | 1.000000 |
| rad51                         | 1.24150e-15 | 1.000000 | 1.24150e-15 | 1.000000 |
| rad41                         | 3.95307e-16 | 1.000000 | 3.95307e-16 | 1.000000 |
| rad42                         | 2.45831e-16 | 1.000000 | 2.45831e-16 | 1.000000 |
| rad65                         | 3.15147e-17 | 1.000000 | 3.15147e-17 | 1.000000 |
| rad53                         | 4.58652e-18 | 1.000000 | 4.58652e-18 | 1.000000 |
| rad64                         | 1.30089e-18 | 1.000000 | 1.30089e-18 | 1.000000 |
| rad61                         | 2.85229e-19 | 1.000000 | 2.85229e-19 | 1.000000 |
| rad56                         | 2.08059e-20 | 1.000000 | 2.08059e-20 | 1.000000 |
| rad68syn                      | 2.52167e-21 | 1.000000 | 2.52167e-21 | 1.000000 |
| rad68anti                     | 1.90889e-21 | 1.000000 | 1.90889e-21 | 1.000000 |
| rad40syn                      | 2.38315e-23 | 1.000000 | 2.38315e-23 | 1.000000 |
| rad40anti                     | 1.90761e-23 | 1.000000 | 1.90761e-23 | 1.000000 |
| PAH8+H                        | 3.38041e-24 | 1.000000 | 3.38041e-24 | 1.000000 |
| rad73                         | 9.42054e-25 | 1.000000 | 9.42054e-25 | 1.000000 |
| rad71                         | 6.14189e-27 | 1.000000 | 6.14189e-27 | 1.000000 |
| rad6                          | 8.38317e-30 | 1.000000 | 8.38317e-30 | 1.000000 |
| rad19anti                     | 6.07589e-30 | 1.000000 | 6.07589e-30 | 1.000000 |
| rad2                          | 3.64406e-31 | 1.000000 | 3.64406e-31 | 1.000000 |
| rad47                         | 9.27304e-32 | 1.000000 | 9.27304e-32 | 1.000000 |
| rad26                         | 6.14009e-32 | 1.000000 | 6.14009e-32 | 1.000000 |
| rad28                         | 2.67242e-32 | 1.000000 | 2.67242e-32 | 1.000000 |
| rad1                          | 2.53686e-32 | 1.000000 | 2.53686e-32 | 1.000000 |
| rad10                         | 1.89188e-32 | 1.000000 | 1.89188e-32 | 1.000000 |
| rad3                          | 2.35743e-33 | 1.000000 | 2.35743e-33 | 1.000000 |
| rad4                          | 1.22120e-33 | 1.000000 | 1.22120e-33 | 1.000000 |
| rad7                          | 6.26078e-34 | 1.000000 | 6.26078e-34 | 1.000000 |
| rad11                         | 1.54266e-34 | 1.000000 | 1.54266e-34 | 1.000000 |
| rad14                         | 2.57216e-35 | 1.000000 | 2.57216e-35 | 1.000000 |
| rad25                         | 1.63762e-35 | 1.000000 | 1.63762e-35 | 1.000000 |
| rad31                         | 1.47015e-35 | 1.000000 | 1.47015e-35 | 1.000000 |
| rad9                          | 1.36176e-35 | 1.000000 | 1.36176e-35 | 1.000000 |
| rad27                         | 4.01331e-36 | 1.000000 | 4.01331e-36 | 1.000000 |
| rad13                         | 3.53570e-36 | 1.000000 | 3.53570e-36 | 1.000000 |
| rad19syn                      | 1.11381e-38 | 1.000000 | 1.11381e-38 | 1.000000 |
| rad33                         | 7.60410e-39 | 1.000000 | 7.60410e-39 | 1.000000 |
| rad5                          | 7.49489e-39 | 1.000000 | 7.49489e-39 | 1.000000 |
| rad15                         | 6.08050e-39 | 1.000000 | 6.08050e-39 | 1.000000 |

|       |             |         |             |         |
|-------|-------------|---------|-------------|---------|
| rad23 | 1.10174e-40 | 1.00000 | 1.10174e-40 | 1.00000 |
| rad20 | 1.13467e-41 | 1.00000 | 1.13467e-41 | 1.00000 |
| rad21 | 1.04817e-41 | 1.00000 | 1.04817e-41 | 1.00000 |
| rad12 | 5.23085e-42 | 1.00000 | 5.23085e-42 | 1.00000 |
| rad45 | 1.16182e-42 | 1.00000 | 1.16182e-42 | 1.00000 |
| rad36 | 7.29527e-44 | 1.00000 | 7.29527e-44 | 1.00000 |
| rad18 | 2.92299e-44 | 1.00000 | 2.92299e-44 | 1.00000 |
| rad22 | 2.38225e-45 | 1.00000 | 2.38225e-45 | 1.00000 |
| rad24 | 2.02424e-46 | 1.00000 | 2.02424e-46 | 1.00000 |
| rad8  | 7.24168e-63 | 1.00000 | 7.24168e-63 | 1.00000 |

0.100000000E-05 Pa, 240.000000 K

| Rate constant             | True (fraction)        | Effective (fraction)   |
|---------------------------|------------------------|------------------------|
| Total                     | 2.45462e-14 (1.00 )    | 2.45462e-14 (1.00 )    |
| Formation of rad19        | 2.45383e-14 (1.000 )   | 2.45383e-14 (1.000 )   |
| H-abstraction to cyc2enyl | 7.92234e-18 (0.000323) | 7.92234e-18 (0.000323) |
| H-abstraction to cyclenyl | 7.97958e-21 (3.25e-07) | 7.97958e-21 (3.25e-07) |

| species                       | PYtrue      | Cumul    | PYeffective | Cumul    |
|-------------------------------|-------------|----------|-------------|----------|
| Indene+H                      | 0.999241    | 0.999241 | 0.999241    | 0.999241 |
| PhCHCCH2+H                    | 0.000411192 | 0.999652 | 0.000411192 | 0.999652 |
| Benzene+cycloprop-2-enylidene | 0.000322752 | 0.999975 | 0.000322752 | 0.999975 |
| PhCCH+CH3                     | 7.38194e-06 | 0.999982 | 7.38194e-06 | 0.999982 |
| C2H2+PhCH2                    | 6.11553e-06 | 0.999989 | 6.11553e-06 | 0.999989 |
| PhCCCH3+H                     | 4.48334e-06 | 0.999993 | 4.48334e-06 | 0.999993 |
| Ph+MeAc                       | 3.92459e-06 | 0.999997 | 3.92459e-06 | 0.999997 |
| rad67                         | 1.14122e-06 | 0.999998 | 1.14122e-06 | 0.999998 |
| rad35                         | 4.87362e-07 | 0.999999 | 4.87362e-07 | 0.999999 |
| Ph+Allene                     | 4.81641e-07 | 0.999999 | 4.81641e-07 | 0.999999 |
| Benzene+cycloprop-1-enylidene | 3.25084e-07 | 0.999999 | 3.25084e-07 | 0.999999 |
| PhCH2CCH+H                    | 7.25479e-08 | 0.999999 | 7.25479e-08 | 0.999999 |
| PAH7+H                        | 5.26263e-08 | 0.999999 | 5.26263e-08 | 0.999999 |
| rad39                         | 1.48191e-08 | 0.999999 | 1.48191e-08 | 0.999999 |
| rad37                         | 1.45757e-08 | 1.000000 | 1.45757e-08 | 1.000000 |
| rad30                         | 9.38702e-09 | 1.000000 | 9.38702e-09 | 1.000000 |
| PAH9+H                        | 8.06648e-10 | 1.000000 | 8.06648e-10 | 1.000000 |
| rad38                         | 3.86297e-10 | 1.000000 | 3.86297e-10 | 1.000000 |
| PAH10+CH3                     | 6.19064e-11 | 1.000000 | 6.19064e-11 | 1.000000 |
| rad60syn                      | 5.88324e-11 | 1.000000 | 5.88324e-11 | 1.000000 |
| PhcycC3H3_A+H                 | 5.47108e-11 | 1.000000 | 5.47108e-11 | 1.000000 |
| PAH3+H                        | 3.74113e-11 | 1.000000 | 3.74113e-11 | 1.000000 |
| rad60anti                     | 2.96857e-11 | 1.000000 | 2.96857e-11 | 1.000000 |
| rad46                         | 2.54475e-11 | 1.000000 | 2.54475e-11 | 1.000000 |
| rad59                         | 7.20068e-12 | 1.000000 | 7.20068e-12 | 1.000000 |
| rad54                         | 2.25392e-12 | 1.000000 | 2.25392e-12 | 1.000000 |
| rad43                         | 2.10782e-12 | 1.000000 | 2.10782e-12 | 1.000000 |
| Phenyl+cycC3H4                | 8.50545e-13 | 1.000000 | 0.00000     | 1.000000 |
| PhcycC3H3_B+H                 | 6.80482e-13 | 1.000000 | 6.80482e-13 | 1.000000 |
| rad62                         | 4.71505e-13 | 1.000000 | 4.71505e-13 | 1.000000 |
| rad50                         | 3.31266e-13 | 1.000000 | 3.31266e-13 | 1.000000 |
| rad70                         | 7.10727e-14 | 1.000000 | 7.10727e-14 | 1.000000 |
| PAH1+H                        | 3.63163e-14 | 1.000000 | 3.63163e-14 | 1.000000 |
| rad55                         | 3.14580e-14 | 1.000000 | 3.14580e-14 | 1.000000 |
| rad52                         | 3.51289e-15 | 1.000000 | 3.51289e-15 | 1.000000 |
| rad58                         | 2.35637e-15 | 1.000000 | 2.35637e-15 | 1.000000 |
| rad34                         | 2.03778e-15 | 1.000000 | 2.03778e-15 | 1.000000 |
| rad51                         | 1.58177e-15 | 1.000000 | 1.58177e-15 | 1.000000 |
| rad41                         | 5.40331e-16 | 1.000000 | 5.40331e-16 | 1.000000 |
| rad42                         | 3.27191e-16 | 1.000000 | 3.27191e-16 | 1.000000 |
| rad65                         | 4.07884e-17 | 1.000000 | 4.07884e-17 | 1.000000 |
| rad53                         | 7.54386e-18 | 1.000000 | 7.54386e-18 | 1.000000 |
| rad64                         | 2.25729e-18 | 1.000000 | 2.25729e-18 | 1.000000 |
| rad61                         | 5.84088e-19 | 1.000000 | 5.84088e-19 | 1.000000 |
| rad56                         | 4.57232e-20 | 1.000000 | 4.57232e-20 | 1.000000 |
| rad68syn                      | 5.68636e-21 | 1.000000 | 5.68636e-21 | 1.000000 |
| rad68anti                     | 4.27665e-21 | 1.000000 | 4.27665e-21 | 1.000000 |
| rad40syn                      | 6.78314e-23 | 1.000000 | 6.78314e-23 | 1.000000 |
| rad40anti                     | 5.41986e-23 | 1.000000 | 5.41986e-23 | 1.000000 |
| PAH8+H                        | 1.13224e-23 | 1.000000 | 1.13224e-23 | 1.000000 |
| rad73                         | 2.68346e-24 | 1.000000 | 2.68346e-24 | 1.000000 |
| rad71                         | 2.20097e-26 | 1.000000 | 2.20097e-26 | 1.000000 |
| rad19anti                     | 2.07742e-29 | 1.000000 | 2.07742e-29 | 1.000000 |
| rad6                          | 1.75673e-29 | 1.000000 | 1.75673e-29 | 1.000000 |
| rad2                          | 7.52413e-31 | 1.000000 | 7.52413e-31 | 1.000000 |
| rad47                         | 1.03946e-31 | 1.000000 | 1.03946e-31 | 1.000000 |
| rad26                         | 7.28723e-32 | 1.000000 | 7.28723e-32 | 1.000000 |
| rad1                          | 5.29355e-32 | 1.000000 | 5.29355e-32 | 1.000000 |

|          |             |          |             |          |
|----------|-------------|----------|-------------|----------|
| rad10    | 3.89392e-32 | 1.000000 | 3.89392e-32 | 1.000000 |
| rad28    | 3.11212e-32 | 1.000000 | 3.11212e-32 | 1.000000 |
| rad3     | 4.56917e-33 | 1.000000 | 4.56917e-33 | 1.000000 |
| rad4     | 2.37389e-33 | 1.000000 | 2.37389e-33 | 1.000000 |
| rad7     | 1.31516e-33 | 1.000000 | 1.31516e-33 | 1.000000 |
| rad11    | 3.23960e-34 | 1.000000 | 3.23960e-34 | 1.000000 |
| rad31    | 4.04870e-35 | 1.000000 | 4.04870e-35 | 1.000000 |
| rad14    | 2.67645e-35 | 1.000000 | 2.67645e-35 | 1.000000 |
| rad9     | 2.05609e-35 | 1.000000 | 2.05609e-35 | 1.000000 |
| rad25    | 1.73665e-35 | 1.000000 | 1.73665e-35 | 1.000000 |
| rad13    | 7.44132e-36 | 1.000000 | 7.44132e-36 | 1.000000 |
| rad27    | 4.36511e-36 | 1.000000 | 4.36511e-36 | 1.000000 |
| rad19syn | 4.33470e-38 | 1.000000 | 4.33470e-38 | 1.000000 |
| rad33    | 1.53053e-38 | 1.000000 | 1.53053e-38 | 1.000000 |
| rad15    | 9.20193e-39 | 1.000000 | 9.20193e-39 | 1.000000 |
| rad5     | 7.16602e-39 | 1.000000 | 7.16602e-39 | 1.000000 |
| rad23    | 4.58290e-40 | 1.000000 | 4.58290e-40 | 1.000000 |
| rad20    | 1.45795e-41 | 1.000000 | 1.45795e-41 | 1.000000 |
| rad21    | 1.36428e-41 | 1.000000 | 1.36428e-41 | 1.000000 |
| rad12    | 9.44901e-42 | 1.000000 | 9.44901e-42 | 1.000000 |
| rad45    | 5.21824e-42 | 1.000000 | 5.21824e-42 | 1.000000 |
| rad36    | 3.29210e-43 | 1.000000 | 3.29210e-43 | 1.000000 |
| rad18    | 3.29845e-44 | 1.000000 | 3.29845e-44 | 1.000000 |
| rad22    | 8.48843e-45 | 1.000000 | 8.48843e-45 | 1.000000 |
| rad24    | 3.19540e-46 | 1.000000 | 3.19540e-46 | 1.000000 |
| rad8     | 1.31971e-62 | 1.000000 | 1.31971e-62 | 1.000000 |

0.100000000E-05 Pa, 250.00000 K

| Rate constant             | True (fraction)        | Effective (fraction)   |
|---------------------------|------------------------|------------------------|
| Total                     | 2.71048e-14 (1.00 )    | 2.71048e-14 (1.00 )    |
| Formation of rad19        | 2.70930e-14 (1.000 )   | 2.70930e-14 (1.000 )   |
| H-abstraction to cyc2enyl | 1.17991e-17 (0.000435) | 1.17991e-17 (0.000435) |
| H-abstraction to cyc1enyl | 1.59554e-20 (5.89e-07) | 1.59554e-20 (5.89e-07) |

| species                       | PYtrue      | Cumul    | PYeffective | Cumul    |
|-------------------------------|-------------|----------|-------------|----------|
| Indene+H                      | 0.999107    | 0.999107 | 0.999107    | 0.999107 |
| Benzene+cycloprop-2-enylidene | 0.000435312 | 0.999543 | 0.000435312 | 0.999543 |
| PhCHCCH2+H                    | 0.000431584 | 0.999974 | 0.000431584 | 0.999974 |
| PhCCH+CH3                     | 7.75719e-06 | 0.999982 | 7.75719e-06 | 0.999982 |
| C2H2+PhCH2                    | 6.51326e-06 | 0.999988 | 6.51326e-06 | 0.999988 |
| PhCCCH3+H                     | 4.74360e-06 | 0.999993 | 4.74360e-06 | 0.999993 |
| Ph+MeAc                       | 4.20682e-06 | 0.999997 | 4.20682e-06 | 0.999997 |
| rad67                         | 1.22017e-06 | 0.999999 | 1.22017e-06 | 0.999999 |
| Benzene+cycloprop-1-enylidene | 5.88656e-07 | 0.999999 | 5.88656e-07 | 0.999999 |
| Ph+Allene                     | 5.31474e-07 | 1.000000 | 5.31474e-07 | 1.000000 |
| rad35                         | 5.19665e-07 | 1.000000 | 5.19665e-07 | 1.000000 |
| PhCH2CCH+H                    | 8.14215e-08 | 1.000000 | 8.14215e-08 | 1.000000 |
| PAH7+H                        | 5.71717e-08 | 1.000000 | 5.71717e-08 | 1.000000 |
| rad39                         | 1.60894e-08 | 1.000000 | 1.60894e-08 | 1.000000 |
| rad37                         | 1.59138e-08 | 1.000000 | 1.59138e-08 | 1.000000 |
| rad30                         | 1.00427e-08 | 1.000000 | 1.00427e-08 | 1.000000 |
| PAH9+H                        | 8.83301e-10 | 1.000000 | 8.83301e-10 | 1.000000 |
| rad38                         | 4.27984e-10 | 1.000000 | 4.27984e-10 | 1.000000 |
| PAH10+CH3                     | 7.44048e-11 | 1.000000 | 7.44048e-11 | 1.000000 |
| PhcycC3H3_A+H                 | 7.30900e-11 | 1.000000 | 7.30900e-11 | 1.000000 |
| rad60syn                      | 6.48407e-11 | 1.000000 | 6.48407e-11 | 1.000000 |
| PAH3+H                        | 4.28259e-11 | 1.000000 | 4.28259e-11 | 1.000000 |
| rad60anti                     | 3.28040e-11 | 1.000000 | 3.28040e-11 | 1.000000 |
| rad46                         | 2.83782e-11 | 1.000000 | 2.83782e-11 | 1.000000 |
| rad59                         | 8.18974e-12 | 1.000000 | 8.18974e-12 | 1.000000 |
| rad54                         | 2.70728e-12 | 1.000000 | 2.70728e-12 | 1.000000 |
| rad43                         | 2.46610e-12 | 1.000000 | 2.46610e-12 | 1.000000 |
| Phenyl+cycC3H4                | 1.23952e-12 | 1.000000 | 0.000000    | 1.000000 |
| PhcycC3H3_B+H                 | 1.09005e-12 | 1.000000 | 1.09005e-12 | 1.000000 |
| rad62                         | 5.51586e-13 | 1.000000 | 5.51586e-13 | 1.000000 |
| rad50                         | 3.90700e-13 | 1.000000 | 3.90700e-13 | 1.000000 |
| rad70                         | 8.95708e-14 | 1.000000 | 8.95708e-14 | 1.000000 |
| PAH1+H                        | 4.84545e-14 | 1.000000 | 4.84545e-14 | 1.000000 |
| rad55                         | 3.96080e-14 | 1.000000 | 3.96080e-14 | 1.000000 |
| rad52                         | 4.31279e-15 | 1.000000 | 4.31279e-15 | 1.000000 |
| rad58                         | 3.03881e-15 | 1.000000 | 3.03881e-15 | 1.000000 |
| rad34                         | 2.73086e-15 | 1.000000 | 2.73086e-15 | 1.000000 |
| rad51                         | 2.03107e-15 | 1.000000 | 2.03107e-15 | 1.000000 |
| rad41                         | 7.39638e-16 | 1.000000 | 7.39638e-16 | 1.000000 |
| rad42                         | 4.36203e-16 | 1.000000 | 4.36203e-16 | 1.000000 |
| rad65                         | 5.31796e-17 | 1.000000 | 5.31796e-17 | 1.000000 |
| rad53                         | 1.22797e-17 | 1.000000 | 1.22797e-17 | 1.000000 |



|           |             |         |             |         |
|-----------|-------------|---------|-------------|---------|
| rad64     | 3.85188e-18 | 1.00000 | 3.85188e-18 | 1.00000 |
| rad61     | 1.15688e-18 | 1.00000 | 1.15688e-18 | 1.00000 |
| rad56     | 9.65553e-20 | 1.00000 | 9.65553e-20 | 1.00000 |
| rad68syn  | 1.22760e-20 | 1.00000 | 1.22760e-20 | 1.00000 |
| rad68anti | 9.17629e-21 | 1.00000 | 9.17629e-21 | 1.00000 |
| rad40syn  | 1.79832e-22 | 1.00000 | 1.79832e-22 | 1.00000 |
| rad40anti | 1.43402e-22 | 1.00000 | 1.43402e-22 | 1.00000 |
| PAH8+H    | 3.45930e-23 | 1.00000 | 3.45930e-23 | 1.00000 |
| rad73     | 7.15481e-24 | 1.00000 | 7.15481e-24 | 1.00000 |
| rad71     | 7.13356e-26 | 1.00000 | 7.13356e-26 | 1.00000 |
| rad19anti | 7.31047e-29 | 1.00000 | 7.31047e-29 | 1.00000 |
| rad6      | 4.17341e-29 | 1.00000 | 4.17341e-29 | 1.00000 |
| rad2      | 1.59624e-30 | 1.00000 | 1.59624e-30 | 1.00000 |
| rad47     | 1.18402e-31 | 1.00000 | 1.18402e-31 | 1.00000 |
| rad1      | 1.13589e-31 | 1.00000 | 1.13589e-31 | 1.00000 |
| rad26     | 9.62950e-32 | 1.00000 | 9.62950e-32 | 1.00000 |
| rad10     | 8.28647e-32 | 1.00000 | 8.28647e-32 | 1.00000 |
| rad28     | 4.18212e-32 | 1.00000 | 4.18212e-32 | 1.00000 |
| rad3      | 9.24954e-33 | 1.00000 | 9.24954e-33 | 1.00000 |
| rad4      | 4.82091e-33 | 1.00000 | 4.82091e-33 | 1.00000 |
| rad7      | 3.13206e-33 | 1.00000 | 3.13206e-33 | 1.00000 |
| rad11     | 7.70973e-34 | 1.00000 | 7.70973e-34 | 1.00000 |
| rad31     | 1.15496e-34 | 1.00000 | 1.15496e-34 | 1.00000 |
| rad9      | 3.28879e-35 | 1.00000 | 3.28879e-35 | 1.00000 |
| rad14     | 2.80578e-35 | 1.00000 | 2.80578e-35 | 1.00000 |
| rad25     | 1.85266e-35 | 1.00000 | 1.85266e-35 | 1.00000 |
| rad13     | 1.77573e-35 | 1.00000 | 1.77573e-35 | 1.00000 |
| rad27     | 4.81700e-36 | 1.00000 | 4.81700e-36 | 1.00000 |
| rad19syn  | 1.76219e-37 | 1.00000 | 1.76219e-37 | 1.00000 |
| rad33     | 3.53926e-38 | 1.00000 | 3.53926e-38 | 1.00000 |
| rad15     | 1.47541e-38 | 1.00000 | 1.47541e-38 | 1.00000 |
| rad5      | 6.86808e-39 | 1.00000 | 6.86808e-39 | 1.00000 |
| rad23     | 2.04445e-39 | 1.00000 | 2.04445e-39 | 1.00000 |
| rad45     | 2.52756e-41 | 1.00000 | 2.52756e-41 | 1.00000 |
| rad20     | 1.90351e-41 | 1.00000 | 1.90351e-41 | 1.00000 |
| rad21     | 1.80430e-41 | 1.00000 | 1.80430e-41 | 1.00000 |
| rad12     | 1.75560e-41 | 1.00000 | 1.75560e-41 | 1.00000 |
| rad36     | 1.60299e-42 | 1.00000 | 1.60299e-42 | 1.00000 |
| rad18     | 3.77992e-44 | 1.00000 | 3.77992e-44 | 1.00000 |
| rad22     | 3.27839e-44 | 1.00000 | 3.27839e-44 | 1.00000 |
| rad24     | 5.15314e-46 | 1.00000 | 5.15314e-46 | 1.00000 |
| rad8      | 2.45880e-62 | 1.00000 | 2.45880e-62 | 1.00000 |

0.100000000E-05 Pa, 260.00000 K

| Rate constant             | True (fraction)        | Effective (fraction)   |
|---------------------------|------------------------|------------------------|
| Total                     | 2.97464e-14 (1.00 )    | 2.97464e-14 (1.00 )    |
| Formation of rad19        | 2.97293e-14 (0.999 )   | 2.97293e-14 (0.999 )   |
| H-abstraction to cyc2enyl | 1.70236e-17 (0.000572) | 1.70236e-17 (0.000572) |
| H-abstraction to cyclenyl | 3.02186e-20 (1.02e-06) | 3.02186e-20 (1.02e-06) |

| species                       | PYtrue      | Cumul    | PYeffective | Cumul    |
|-------------------------------|-------------|----------|-------------|----------|
| Indene+H                      | 0.998946    | 0.998946 | 0.998946    | 0.998946 |
| Benzene+cycloprop-2-enylidene | 0.000572291 | 0.999518 | 0.000572291 | 0.999518 |
| PhCHCCH2+H                    | 0.000453848 | 0.999972 | 0.000453848 | 0.999972 |
| PhCCH+CH3                     | 8.16530e-06 | 0.999980 | 8.16530e-06 | 0.999980 |
| C2H2+PhCH2                    | 6.95321e-06 | 0.999987 | 6.95321e-06 | 0.999987 |
| PhCCCH3+H                     | 5.02932e-06 | 0.999992 | 5.02932e-06 | 0.999992 |
| Ph+MeAc                       | 4.52059e-06 | 0.999997 | 4.52059e-06 | 0.999997 |
| rad67                         | 1.30786e-06 | 0.999998 | 1.30786e-06 | 0.999998 |
| Benzene+cycloprop-1-enylidene | 1.01588e-06 | 0.999999 | 1.01588e-06 | 0.999999 |
| Ph+Allene                     | 5.88618e-07 | 1.000000 | 5.88618e-07 | 1.000000 |
| rad35                         | 5.55458e-07 | 1.000000 | 5.55458e-07 | 1.000000 |
| PhCH2CCH+H                    | 9.17637e-08 | 1.000000 | 9.17637e-08 | 1.000000 |
| PAH7+H                        | 6.23016e-08 | 1.000000 | 6.23016e-08 | 1.000000 |
| rad39                         | 1.75209e-08 | 1.000000 | 1.75209e-08 | 1.000000 |
| rad37                         | 1.74317e-08 | 1.000000 | 1.74317e-08 | 1.000000 |
| rad30                         | 1.07732e-08 | 1.000000 | 1.07732e-08 | 1.000000 |
| PAH9+H                        | 9.70823e-10 | 1.000000 | 9.70823e-10 | 1.000000 |
| rad38                         | 4.76210e-10 | 1.000000 | 4.76210e-10 | 1.000000 |
| PhcycC3H3_A+H                 | 9.76900e-11 | 1.000000 | 9.76900e-11 | 1.000000 |
| PAH10+CH3                     | 8.98996e-11 | 1.000000 | 8.98996e-11 | 1.000000 |
| rad60syn                      | 7.17361e-11 | 1.000000 | 7.17361e-11 | 1.000000 |
| PAH3+H                        | 4.92719e-11 | 1.000000 | 4.92719e-11 | 1.000000 |
| rad60anti                     | 3.63918e-11 | 1.000000 | 3.63918e-11 | 1.000000 |
| rad46                         | 3.17862e-11 | 1.000000 | 3.17862e-11 | 1.000000 |
| rad59                         | 9.35934e-12 | 1.000000 | 9.35934e-12 | 1.000000 |
| rad54                         | 3.26922e-12 | 1.000000 | 3.26922e-12 | 1.000000 |

|                |             |         |             |         |
|----------------|-------------|---------|-------------|---------|
| rad43          | 2.89822e-12 | 1.00000 | 2.89822e-12 | 1.00000 |
| Phenyl+cycC3H4 | 1.79997e-12 | 1.00000 | 0.00000     | 1.00000 |
| PhcycC3H3_B+H  | 1.72357e-12 | 1.00000 | 1.72357e-12 | 1.00000 |
| rad62          | 6.47858e-13 | 1.00000 | 6.47858e-13 | 1.00000 |
| rad50          | 4.63657e-13 | 1.00000 | 4.63657e-13 | 1.00000 |
| rad70          | 1.13462e-13 | 1.00000 | 1.13462e-13 | 1.00000 |
| PAH1+H         | 6.48746e-14 | 1.00000 | 6.48746e-14 | 1.00000 |
| rad55          | 5.01162e-14 | 1.00000 | 5.01162e-14 | 1.00000 |
| rad52          | 5.33109e-15 | 1.00000 | 5.33109e-15 | 1.00000 |
| rad58          | 3.93954e-15 | 1.00000 | 3.93954e-15 | 1.00000 |
| rad34          | 3.67253e-15 | 1.00000 | 3.67253e-15 | 1.00000 |
| rad51          | 2.62615e-15 | 1.00000 | 2.62615e-15 | 1.00000 |
| rad41          | 1.01308e-15 | 1.00000 | 1.01308e-15 | 1.00000 |
| rad42          | 5.82033e-16 | 1.00000 | 5.82033e-16 | 1.00000 |
| rad65          | 6.97793e-17 | 1.00000 | 6.97793e-17 | 1.00000 |
| rad53          | 1.97860e-17 | 1.00000 | 1.97860e-17 | 1.00000 |
| rad64          | 6.46999e-18 | 1.00000 | 6.46999e-18 | 1.00000 |
| rad61          | 2.22252e-18 | 1.00000 | 2.22252e-18 | 1.00000 |
| rad56          | 1.96583e-19 | 1.00000 | 1.96583e-19 | 1.00000 |
| rad68syn       | 2.54704e-20 | 1.00000 | 2.54704e-20 | 1.00000 |
| rad68anti      | 1.89312e-20 | 1.00000 | 1.89312e-20 | 1.00000 |
| rad40syn       | 4.46797e-22 | 1.00000 | 4.46797e-22 | 1.00000 |
| rad40anti      | 3.55555e-22 | 1.00000 | 3.55555e-22 | 1.00000 |
| PAH8+H         | 9.71820e-23 | 1.00000 | 9.71820e-23 | 1.00000 |
| rad73          | 1.79367e-23 | 1.00000 | 1.79367e-23 | 1.00000 |
| rad71          | 2.10958e-25 | 1.00000 | 2.10958e-25 | 1.00000 |
| rad19anti      | 2.63449e-28 | 1.00000 | 2.63449e-28 | 1.00000 |
| rad6           | 1.11078e-28 | 1.00000 | 1.11078e-28 | 1.00000 |
| rad2           | 3.52494e-30 | 1.00000 | 3.52494e-30 | 1.00000 |
| rad1           | 2.53935e-31 | 1.00000 | 2.53935e-31 | 1.00000 |
| rad10          | 1.82923e-31 | 1.00000 | 1.82923e-31 | 1.00000 |
| rad26          | 1.42838e-31 | 1.00000 | 1.42838e-31 | 1.00000 |
| rad47          | 1.37151e-31 | 1.00000 | 1.37151e-31 | 1.00000 |
| rad28          | 6.66242e-32 | 1.00000 | 6.66242e-32 | 1.00000 |
| rad3           | 1.91827e-32 | 1.00000 | 1.91827e-32 | 1.00000 |
| rad4           | 1.00327e-32 | 1.00000 | 1.00327e-32 | 1.00000 |
| rad7           | 8.35658e-33 | 1.00000 | 8.35658e-33 | 1.00000 |
| rad11          | 2.05445e-33 | 1.00000 | 2.05445e-33 | 1.00000 |
| rad31          | 3.40261e-34 | 1.00000 | 3.40261e-34 | 1.00000 |
| rad9           | 5.78893e-35 | 1.00000 | 5.78893e-35 | 1.00000 |
| rad13          | 4.74806e-35 | 1.00000 | 4.74806e-35 | 1.00000 |
| rad14          | 2.96886e-35 | 1.00000 | 2.96886e-35 | 1.00000 |
| rad25          | 1.98877e-35 | 1.00000 | 1.98877e-35 | 1.00000 |
| rad27          | 5.42751e-36 | 1.00000 | 5.42751e-36 | 1.00000 |
| rad19syn       | 7.46104e-37 | 1.00000 | 7.46104e-37 | 1.00000 |
| rad33          | 9.28064e-38 | 1.00000 | 9.28064e-38 | 1.00000 |
| rad15          | 2.60352e-38 | 1.00000 | 2.60352e-38 | 1.00000 |
| rad23          | 9.72269e-39 | 1.00000 | 9.72269e-39 | 1.00000 |
| rad5           | 6.59712e-39 | 1.00000 | 6.59712e-39 | 1.00000 |
| rad45          | 1.32775e-40 | 1.00000 | 1.32775e-40 | 1.00000 |
| rad12          | 3.35810e-41 | 1.00000 | 3.35810e-41 | 1.00000 |
| rad20          | 2.53900e-41 | 1.00000 | 2.53900e-41 | 1.00000 |
| rad21          | 2.43534e-41 | 1.00000 | 2.43534e-41 | 1.00000 |
| rad36          | 8.46998e-42 | 1.00000 | 8.46998e-42 | 1.00000 |
| rad22          | 1.35042e-43 | 1.00000 | 1.35042e-43 | 1.00000 |
| rad18          | 4.46873e-44 | 1.00000 | 4.46873e-44 | 1.00000 |
| rad24          | 8.49765e-46 | 1.00000 | 8.49765e-46 | 1.00000 |
| rad8           | 4.68586e-62 | 1.00000 | 4.68586e-62 | 1.00000 |

0.100000000E-05 Pa, 270.000000 K

| =====                         |                 |            |                      |            |
|-------------------------------|-----------------|------------|----------------------|------------|
| Rate constant                 | True (fraction) |            | Effective (fraction) |            |
| -----                         |                 |            |                      |            |
| Total                         | 3.24655e-14     | (1.00 )    | 3.24655e-14          | (1.00 )    |
| Formation of rad19            | 3.24415e-14     | (0.999 )   | 3.24415e-14          | (0.999 )   |
| H-abstraction to cyc2enyl     | 2.38790e-17     | (0.000736) | 2.38790e-17          | (0.000736) |
| H-abstraction to cyclenyl     | 5.45397e-20     | (1.68e-06) | 5.45397e-20          | (1.68e-06) |
| species                       | PYtrue          | Cumul      | PYeffective          | Cumul      |
| -----                         |                 |            |                      |            |
| Indene+H                      | 0.998755        | 0.998755   | 0.998755             | 0.998755   |
| Benzene+cycloprop-2-enylidene | 0.000735519     | 0.999491   | 0.000735519          | 0.999491   |
| PhCHCCH2+H                    | 0.000478146     | 0.999969   | 0.000478146          | 0.999969   |
| PhCCH+CH3                     | 8.60880e-06     | 0.999977   | 8.60880e-06          | 0.999977   |
| C2H2+PhCH2                    | 7.43973e-06     | 0.999985   | 7.43973e-06          | 0.999985   |
| PhCCCH3+H                     | 5.34286e-06     | 0.999990   | 5.34286e-06          | 0.999990   |
| Ph+MeAc                       | 4.86938e-06     | 0.999995   | 4.86938e-06          | 0.999995   |
| Benzene+cycloprop-1-enylidene | 1.67993e-06     | 0.999997   | 1.67993e-06          | 0.999997   |
| rad67                         | 1.40525e-06     | 0.999998   | 1.40525e-06          | 0.999998   |
| Ph+Allene                     | 6.54187e-07     | 0.999999   | 6.54187e-07          | 0.999999   |

|                |             |          |             |          |
|----------------|-------------|----------|-------------|----------|
| rad35          | 5.95116e-07 | 0.999999 | 5.95116e-07 | 0.999999 |
| PhCH2CCH+H     | 1.03828e-07 | 1.000000 | 1.03828e-07 | 1.000000 |
| PAH7+H         | 6.80924e-08 | 1.000000 | 6.80924e-08 | 1.000000 |
| rad37          | 1.91542e-08 | 1.000000 | 1.91542e-08 | 1.000000 |
| rad39          | 1.91343e-08 | 1.000000 | 1.91343e-08 | 1.000000 |
| rad30          | 1.15872e-08 | 1.000000 | 1.15872e-08 | 1.000000 |
| PAH9+H         | 1.07084e-09 | 1.000000 | 1.07084e-09 | 1.000000 |
| rad38          | 5.32069e-10 | 1.000000 | 5.32069e-10 | 1.000000 |
| PhcycC3H3_A+H  | 1.30538e-10 | 1.000000 | 1.30538e-10 | 1.000000 |
| PAH10+CH3      | 1.09134e-10 | 1.000000 | 1.09134e-10 | 1.000000 |
| rad60syn       | 7.96566e-11 | 1.000000 | 7.96566e-11 | 1.000000 |
| PAH3+H         | 5.69580e-11 | 1.000000 | 5.69580e-11 | 1.000000 |
| rad60anti      | 4.05238e-11 | 1.000000 | 4.05238e-11 | 1.000000 |
| rad46          | 3.57543e-11 | 1.000000 | 3.57543e-11 | 1.000000 |
| rad59          | 1.07444e-11 | 1.000000 | 1.07444e-11 | 1.000000 |
| rad54          | 3.96666e-12 | 1.000000 | 3.96666e-12 | 1.000000 |
| rad43          | 3.41976e-12 | 1.000000 | 3.41976e-12 | 1.000000 |
| PhcycC3H3_B+H  | 2.69151e-12 | 1.000000 | 2.69151e-12 | 1.000000 |
| Phenyl+cycC3H4 | 2.60320e-12 | 1.000000 | 0.00000     | 1.000000 |
| rad62          | 7.63634e-13 | 1.000000 | 7.63634e-13 | 1.000000 |
| rad50          | 5.53420e-13 | 1.000000 | 5.53420e-13 | 1.000000 |
| rad70          | 1.44343e-13 | 1.000000 | 1.44343e-13 | 1.000000 |
| PAH1+H         | 8.70739e-14 | 1.000000 | 8.70739e-14 | 1.000000 |
| rad55          | 6.36740e-14 | 1.000000 | 6.36740e-14 | 1.000000 |
| rad52          | 6.63065e-15 | 1.000000 | 6.63065e-15 | 1.000000 |
| rad58          | 5.12944e-15 | 1.000000 | 5.12944e-15 | 1.000000 |
| rad34          | 4.95119e-15 | 1.000000 | 4.95119e-15 | 1.000000 |
| rad51          | 3.41605e-15 | 1.000000 | 3.41605e-15 | 1.000000 |
| rad41          | 1.38732e-15 | 1.000000 | 1.38732e-15 | 1.000000 |
| rad42          | 7.76679e-16 | 1.000000 | 7.76679e-16 | 1.000000 |
| rad65          | 9.20538e-17 | 1.000000 | 9.20538e-17 | 1.000000 |
| rad53          | 3.15549e-17 | 1.000000 | 3.15549e-17 | 1.000000 |
| rad64          | 1.07030e-17 | 1.000000 | 1.07030e-17 | 1.000000 |
| rad61          | 4.14942e-18 | 1.000000 | 4.14942e-18 | 1.000000 |
| rad56          | 3.86758e-19 | 1.000000 | 3.86758e-19 | 1.000000 |
| rad68syn       | 5.09279e-20 | 1.000000 | 5.09279e-20 | 1.000000 |
| rad68anti      | 3.76574e-20 | 1.000000 | 3.76574e-20 | 1.000000 |
| rad40syn       | 1.04541e-21 | 1.000000 | 1.04541e-21 | 1.000000 |
| rad40anti      | 8.30243e-22 | 1.000000 | 8.30243e-22 | 1.000000 |
| PAH8+H         | 2.52772e-22 | 1.000000 | 2.52772e-22 | 1.000000 |
| rad73          | 4.24308e-23 | 1.000000 | 4.24308e-23 | 1.000000 |
| rad71          | 5.73648e-25 | 1.000000 | 5.73648e-25 | 1.000000 |
| rad19anti      | 9.66950e-28 | 1.000000 | 9.66950e-28 | 1.000000 |
| rad6           | 3.23364e-28 | 1.000000 | 3.23364e-28 | 1.000000 |
| rad2           | 8.01332e-30 | 1.000000 | 8.01332e-30 | 1.000000 |
| rad1           | 5.84954e-31 | 1.000000 | 5.84954e-31 | 1.000000 |
| rad10          | 4.17798e-31 | 1.000000 | 4.17798e-31 | 1.000000 |
| rad26          | 2.35617e-31 | 1.000000 | 2.35617e-31 | 1.000000 |
| rad47          | 1.61683e-31 | 1.000000 | 1.61683e-31 | 1.000000 |
| rad28          | 1.24772e-31 | 1.000000 | 1.24772e-31 | 1.000000 |
| rad3           | 4.14792e-32 | 1.000000 | 4.14792e-32 | 1.000000 |
| rad7           | 2.43851e-32 | 1.000000 | 2.43851e-32 | 1.000000 |
| rad4           | 2.17751e-32 | 1.000000 | 2.17751e-32 | 1.000000 |
| rad11          | 5.98373e-33 | 1.000000 | 5.98373e-33 | 1.000000 |
| rad31          | 1.03174e-33 | 1.000000 | 1.03174e-33 | 1.000000 |
| rad13          | 1.38878e-34 | 1.000000 | 1.38878e-34 | 1.000000 |
| rad9           | 1.18614e-34 | 1.000000 | 1.18614e-34 | 1.000000 |
| rad14          | 3.18152e-35 | 1.000000 | 3.18152e-35 | 1.000000 |
| rad25          | 2.14951e-35 | 1.000000 | 2.14951e-35 | 1.000000 |
| rad27          | 6.31290e-36 | 1.000000 | 6.31290e-36 | 1.000000 |
| rad19syn       | 3.27847e-36 | 1.000000 | 3.27847e-36 | 1.000000 |
| rad33          | 2.68326e-37 | 1.000000 | 2.68326e-37 | 1.000000 |
| rad15          | 5.34859e-38 | 1.000000 | 5.34859e-38 | 1.000000 |
| rad23          | 4.89879e-38 | 1.000000 | 4.89879e-38 | 1.000000 |
| rad5           | 6.34997e-39 | 1.000000 | 6.34997e-39 | 1.000000 |
| rad45          | 7.36447e-40 | 1.000000 | 7.36447e-40 | 1.000000 |
| rad12          | 6.62105e-41 | 1.000000 | 6.62105e-41 | 1.000000 |
| rad36          | 4.72830e-41 | 1.000000 | 4.72830e-41 | 1.000000 |
| rad20          | 3.50432e-41 | 1.000000 | 3.50432e-41 | 1.000000 |
| rad21          | 3.38919e-41 | 1.000000 | 3.38919e-41 | 1.000000 |
| rad22          | 5.87653e-43 | 1.000000 | 5.87653e-43 | 1.000000 |
| rad18          | 5.67451e-44 | 1.000000 | 5.67451e-44 | 1.000000 |
| rad24          | 1.43503e-45 | 1.000000 | 1.43503e-45 | 1.000000 |
| rad8           | 9.13967e-62 | 1.000000 | 9.13967e-62 | 1.000000 |

0.100000000E-05 Pa, 280.00000 K

| Rate constant | True (fraction)   | Effective (fraction) |
|---------------|-------------------|----------------------|
| Total         | 3.52572e-14 (1.00 | ) 3.52572e-14 (1.00  |

Formation of rad19 | 3.52244e-14 (0.999 ) 3.52244e-14 (0.999 )  
H-abstraction to cyc2enyl | 3.26639e-17 (0.000926) 3.26639e-17 (0.000926)  
H-abstraction to cyc1enyl | 9.42926e-20 (2.67e-06) 9.42926e-20 (2.67e-06)

| species                       | PYtrue      | Cumul    | PYeffective | Cumul    |
|-------------------------------|-------------|----------|-------------|----------|
| Indene+H                      | 0.998535    | 0.998535 | 0.998535    | 0.998535 |
| Benzene+cycloprop-2-enylidene | 0.000926445 | 0.999462 | 0.000926445 | 0.999462 |
| PhCHCCH2+H                    | 0.000504654 | 0.999966 | 0.000504654 | 0.999966 |
| PhCCH+CH3                     | 9.09038e-06 | 0.999976 | 9.09038e-06 | 0.999976 |
| C2H2+PhCH2                    | 7.97755e-06 | 0.999984 | 7.97755e-06 | 0.999984 |
| PhCCCH3+H                     | 5.68676e-06 | 0.999989 | 5.68676e-06 | 0.999989 |
| Ph+MeAc                       | 5.25697e-06 | 0.999994 | 5.25697e-06 | 0.999994 |
| Benzene+cycloprop-1-enylidene | 2.67442e-06 | 0.999997 | 2.67442e-06 | 0.999997 |
| rad67                         | 1.51340e-06 | 0.999999 | 1.51340e-06 | 0.999999 |
| Ph+Allene                     | 7.29448e-07 | 0.999999 | 7.29448e-07 | 0.999999 |
| rad35                         | 6.39046e-07 | 1.00000  | 6.39046e-07 | 1.00000  |
| PhCH2CCH+H                    | 1.17909e-07 | 1.00000  | 1.17909e-07 | 1.00000  |
| PAH7+H                        | 7.46290e-08 | 1.00000  | 7.46290e-08 | 1.00000  |
| rad37                         | 2.11094e-08 | 1.00000  | 2.11094e-08 | 1.00000  |
| rad39                         | 2.09522e-08 | 1.00000  | 2.09522e-08 | 1.00000  |
| rad30                         | 1.24940e-08 | 1.00000  | 1.24940e-08 | 1.00000  |
| PAH9+H                        | 1.18522e-09 | 1.00000  | 1.18522e-09 | 1.00000  |
| rad38                         | 5.96837e-10 | 1.00000  | 5.96837e-10 | 1.00000  |
| PhcycC3H3_A+H                 | 1.74264e-10 | 1.00000  | 1.74264e-10 | 1.00000  |
| PAH10+CH3                     | 1.33029e-10 | 1.00000  | 1.33029e-10 | 1.00000  |
| rad60syn                      | 8.87606e-11 | 1.00000  | 8.87606e-11 | 1.00000  |
| PAH3+H                        | 6.61334e-11 | 1.00000  | 6.61334e-11 | 1.00000  |
| rad60anti                     | 4.52857e-11 | 1.00000  | 4.52857e-11 | 1.00000  |
| rad46                         | 4.03795e-11 | 1.00000  | 4.03795e-11 | 1.00000  |
| rad59                         | 1.23862e-11 | 1.00000  | 1.23862e-11 | 1.00000  |
| rad54                         | 4.83284e-12 | 1.00000  | 4.83284e-12 | 1.00000  |
| PhcycC3H3_B+H                 | 4.15199e-12 | 1.00000  | 4.15199e-12 | 1.00000  |
| rad43                         | 4.04946e-12 | 1.00000  | 4.04946e-12 | 1.00000  |
| Phenyl+cycC3H4                | 3.74742e-12 | 1.00000  | 0.00000     | 1.00000  |
| rad62                         | 9.02853e-13 | 1.00000  | 9.02853e-13 | 1.00000  |
| rad50                         | 6.64061e-13 | 1.00000  | 6.64061e-13 | 1.00000  |
| rad70                         | 1.84259e-13 | 1.00000  | 1.84259e-13 | 1.00000  |
| PAH1+H                        | 1.17039e-13 | 1.00000  | 1.17039e-13 | 1.00000  |
| rad55                         | 8.11651e-14 | 1.00000  | 8.11651e-14 | 1.00000  |
| rad52                         | 8.29198e-15 | 1.00000  | 8.29198e-15 | 1.00000  |
| rad58                         | 6.70136e-15 | 1.00000  | 6.70136e-15 | 1.00000  |
| rad34                         | 6.68467e-15 | 1.00000  | 6.68467e-15 | 1.00000  |
| rad51                         | 4.46577e-15 | 1.00000  | 4.46577e-15 | 1.00000  |
| rad41                         | 1.89783e-15 | 1.00000  | 1.89783e-15 | 1.00000  |
| rad42                         | 1.03572e-15 | 1.00000  | 1.03572e-15 | 1.00000  |
| rad65                         | 1.21961e-16 | 1.00000  | 1.21961e-16 | 1.00000  |
| rad53                         | 4.97919e-17 | 1.00000  | 4.97919e-17 | 1.00000  |
| rad64                         | 1.74396e-17 | 1.00000  | 1.74396e-17 | 1.00000  |
| rad61                         | 7.53772e-18 | 1.00000  | 7.53772e-18 | 1.00000  |
| rad56                         | 7.36384e-19 | 1.00000  | 7.36384e-19 | 1.00000  |
| rad68syn                      | 9.83169e-20 | 1.00000  | 9.83169e-20 | 1.00000  |
| rad68anti                     | 7.23595e-20 | 1.00000  | 7.23595e-20 | 1.00000  |
| rad40syn                      | 2.31284e-21 | 1.00000  | 2.31284e-21 | 1.00000  |
| rad40anti                     | 1.83329e-21 | 1.00000  | 1.83329e-21 | 1.00000  |
| PAH8+H                        | 6.12419e-22 | 1.00000  | 6.12419e-22 | 1.00000  |
| rad73                         | 9.50003e-23 | 1.00000  | 9.50003e-23 | 1.00000  |
| rad71                         | 1.44434e-24 | 1.00000  | 1.44434e-24 | 1.00000  |
| rad19anti                     | 3.59338e-27 | 1.00000  | 3.59338e-27 | 1.00000  |
| rad6                          | 9.99411e-28 | 1.00000  | 9.99411e-28 | 1.00000  |
| rad2                          | 1.89474e-29 | 1.00000  | 1.89474e-29 | 1.00000  |
| rad1                          | 1.40287e-30 | 1.00000  | 1.40287e-30 | 1.00000  |
| rad10                         | 9.85490e-31 | 1.00000  | 9.85490e-31 | 1.00000  |
| rad26                         | 4.23532e-31 | 1.00000  | 4.23532e-31 | 1.00000  |
| rad28                         | 2.64600e-31 | 1.00000  | 2.64600e-31 | 1.00000  |
| rad47                         | 1.94125e-31 | 1.00000  | 1.94125e-31 | 1.00000  |
| rad3                          | 9.19936e-32 | 1.00000  | 9.19936e-32 | 1.00000  |
| rad7                          | 7.55386e-32 | 1.00000  | 7.55386e-32 | 1.00000  |
| rad4                          | 4.84879e-32 | 1.00000  | 4.84879e-32 | 1.00000  |
| rad11                         | 1.84879e-32 | 1.00000  | 1.84879e-32 | 1.00000  |
| rad31                         | 3.20736e-33 | 1.00000  | 3.20736e-33 | 1.00000  |
| rad13                         | 4.31303e-34 | 1.00000  | 4.31303e-34 | 1.00000  |
| rad9                          | 2.96201e-34 | 1.00000  | 2.96201e-34 | 1.00000  |
| rad14                         | 3.47390e-35 | 1.00000  | 3.47390e-35 | 1.00000  |
| rad25                         | 2.34214e-35 | 1.00000  | 2.34214e-35 | 1.00000  |
| rad19syn                      | 1.48909e-35 | 1.00000  | 1.48909e-35 | 1.00000  |
| rad27                         | 7.71529e-36 | 1.00000  | 7.71529e-36 | 1.00000  |
| rad33                         | 8.26972e-37 | 1.00000  | 8.26972e-37 | 1.00000  |
| rad23                         | 2.59846e-37 | 1.00000  | 2.59846e-37 | 1.00000  |
| rad15                         | 1.33928e-37 | 1.00000  | 1.33928e-37 | 1.00000  |

|       |             |         |             |         |
|-------|-------------|---------|-------------|---------|
| rad5  | 6.12409e-39 | 1.00000 | 6.12409e-39 | 1.00000 |
| rad45 | 4.36056e-39 | 1.00000 | 4.36056e-39 | 1.00000 |
| rad36 | 2.81952e-40 | 1.00000 | 2.81952e-40 | 1.00000 |
| rad12 | 1.34805e-40 | 1.00000 | 1.34805e-40 | 1.00000 |
| rad20 | 5.14611e-41 | 1.00000 | 5.14611e-41 | 1.00000 |
| rad21 | 4.97358e-41 | 1.00000 | 4.97358e-41 | 1.00000 |
| rad22 | 2.68190e-42 | 1.00000 | 2.68190e-42 | 1.00000 |
| rad18 | 8.41125e-44 | 1.00000 | 8.41125e-44 | 1.00000 |
| rad24 | 2.48910e-45 | 1.00000 | 2.48910e-45 | 1.00000 |
| rad8  | 1.82566e-61 | 1.00000 | 1.82566e-61 | 1.00000 |

0.100000000E-05 Pa, 290.000000 K

=====

| Rate constant             | True (fraction)        | Effective (fraction)   |
|---------------------------|------------------------|------------------------|
| Total                     | 3.81171e-14 (1.00 )    | 3.81171e-14 (1.00 )    |
| Formation of rad19        | 3.80733e-14 (0.999 )   | 3.80733e-14 (0.999 )   |
| H-abstraction to cyc2enyl | 4.36868e-17 (0.00115 ) | 4.36868e-17 (0.00115 ) |
| H-abstraction to cyclenyl | 1.56861e-19 (4.12e-06) | 1.56861e-19 (4.12e-06) |

| species                       | PYtrue      | Cumul    | PYeffective | Cumul    |
|-------------------------------|-------------|----------|-------------|----------|
| Indene+H                      | 0.998282    | 0.998282 | 0.998282    | 0.998282 |
| Benzene+cycloprop-2-enylidene | 0.00114612  | 0.999429 | 0.00114612  | 0.999429 |
| PhCHCCH2+H                    | 0.000533552 | 0.999962 | 0.000533552 | 0.999962 |
| PhCCH+CH3                     | 9.61277e-06 | 0.999972 | 9.61277e-06 | 0.999972 |
| C2H2+PhCH2                    | 8.57172e-06 | 0.999980 | 8.57172e-06 | 0.999980 |
| PhCCCH3+H                     | 6.06370e-06 | 0.999986 | 6.06370e-06 | 0.999986 |
| Ph+MeAc                       | 5.68749e-06 | 0.999992 | 5.68749e-06 | 0.999992 |
| Benzene+cycloprop-1-enylidene | 4.11523e-06 | 0.999996 | 4.11523e-06 | 0.999996 |
| rad67                         | 1.63346e-06 | 0.999998 | 1.63346e-06 | 0.999998 |
| Ph+Allene                     | 8.15840e-07 | 0.999999 | 8.15840e-07 | 0.999999 |
| rad35                         | 6.87689e-07 | 0.999999 | 6.87689e-07 | 0.999999 |
| PhCH2CCH+H                    | 1.34349e-07 | 0.999999 | 1.34349e-07 | 0.999999 |
| PAH7+H                        | 8.20060e-08 | 0.999999 | 8.20060e-08 | 0.999999 |
| rad37                         | 2.33285e-08 | 1.000000 | 2.33285e-08 | 1.000000 |
| rad39                         | 2.30001e-08 | 1.000000 | 2.30001e-08 | 1.000000 |
| rad30                         | 1.35042e-08 | 1.000000 | 1.35042e-08 | 1.000000 |
| PAH9+H                        | 1.31607e-09 | 1.000000 | 1.31607e-09 | 1.000000 |
| rad38                         | 6.71988e-10 | 1.000000 | 6.71988e-10 | 1.000000 |
| PhcycC3H3_A+H                 | 2.32248e-10 | 1.000000 | 2.32248e-10 | 1.000000 |
| PAH10+CH3                     | 1.62717e-10 | 1.000000 | 1.62717e-10 | 1.000000 |
| rad60syn                      | 9.92285e-11 | 1.000000 | 9.92285e-11 | 1.000000 |
| PAH3+H                        | 7.70956e-11 | 1.000000 | 7.70956e-11 | 1.000000 |
| rad60anti                     | 5.07758e-11 | 1.000000 | 5.07758e-11 | 1.000000 |
| rad46                         | 4.57748e-11 | 1.000000 | 4.57748e-11 | 1.000000 |
| rad59                         | 1.43338e-11 | 1.000000 | 1.43338e-11 | 1.000000 |
| PhcycC3H3_B+H                 | 6.32701e-12 | 1.000000 | 6.32701e-12 | 1.000000 |
| rad54                         | 5.90859e-12 | 1.000000 | 5.90859e-12 | 1.000000 |
| Phenyl+cycC3H4                | 5.36584e-12 | 1.000000 | 0.000000    | 1.000000 |
| rad43                         | 4.80969e-12 | 1.000000 | 4.80969e-12 | 1.000000 |
| rad62                         | 1.07018e-12 | 1.000000 | 1.07018e-12 | 1.000000 |
| rad50                         | 8.00597e-13 | 1.000000 | 8.00597e-13 | 1.000000 |
| rad70                         | 2.35807e-13 | 1.000000 | 2.35807e-13 | 1.000000 |
| PAH1+H                        | 1.57377e-13 | 1.000000 | 1.57377e-13 | 1.000000 |
| rad55                         | 1.03709e-13 | 1.000000 | 1.03709e-13 | 1.000000 |
| rad52                         | 1.04176e-14 | 1.000000 | 1.04176e-14 | 1.000000 |
| rad34                         | 9.02825e-15 | 1.000000 | 9.02825e-15 | 1.000000 |
| rad58                         | 8.77577e-15 | 1.000000 | 8.77577e-15 | 1.000000 |
| rad51                         | 5.86071e-15 | 1.000000 | 5.86071e-15 | 1.000000 |
| rad41                         | 2.59126e-15 | 1.000000 | 2.59126e-15 | 1.000000 |
| rad42                         | 1.37914e-15 | 1.000000 | 1.37914e-15 | 1.000000 |
| rad65                         | 1.62088e-16 | 1.000000 | 1.62088e-16 | 1.000000 |
| rad53                         | 7.76876e-17 | 1.000000 | 7.76876e-17 | 1.000000 |
| rad64                         | 2.79837e-17 | 1.000000 | 2.79837e-17 | 1.000000 |
| rad61                         | 1.33318e-17 | 1.000000 | 1.33318e-17 | 1.000000 |
| rad56                         | 1.35816e-18 | 1.000000 | 1.35816e-18 | 1.000000 |
| rad68syn                      | 1.83484e-19 | 1.000000 | 1.83484e-19 | 1.000000 |
| rad68anti                     | 1.34481e-19 | 1.000000 | 1.34481e-19 | 1.000000 |
| rad40syn                      | 4.85494e-21 | 1.000000 | 4.85494e-21 | 1.000000 |
| rad40anti                     | 3.84148e-21 | 1.000000 | 3.84148e-21 | 1.000000 |
| PAH8+H                        | 1.38965e-21 | 1.000000 | 1.38965e-21 | 1.000000 |
| rad73                         | 2.01863e-22 | 1.000000 | 2.01863e-22 | 1.000000 |
| rad71                         | 3.38824e-24 | 1.000000 | 3.38824e-24 | 1.000000 |
| rad19anti                     | 1.34354e-26 | 1.000000 | 1.34354e-26 | 1.000000 |
| rad6                          | 3.18927e-27 | 1.000000 | 3.18927e-27 | 1.000000 |
| rad2                          | 4.58204e-29 | 1.000000 | 4.58204e-29 | 1.000000 |
| rad1                          | 3.44444e-30 | 1.000000 | 3.44444e-30 | 1.000000 |
| rad10                         | 2.39183e-30 | 1.000000 | 2.39183e-30 | 1.000000 |
| rad26                         | 8.12042e-31 | 1.000000 | 8.12042e-31 | 1.000000 |

|          |             |          |             |          |
|----------|-------------|----------|-------------|----------|
| rad28    | 6.08088e-31 | 1.000000 | 6.08088e-31 | 1.000000 |
| rad7     | 2.41568e-31 | 1.000000 | 2.41568e-31 | 1.000000 |
| rad47    | 2.37555e-31 | 1.000000 | 2.37555e-31 | 1.000000 |
| rad3     | 2.11318e-31 | 1.000000 | 2.11318e-31 | 1.000000 |
| rad4     | 1.11863e-31 | 1.000000 | 1.11863e-31 | 1.000000 |
| rad11    | 5.89241e-32 | 1.000000 | 5.89241e-32 | 1.000000 |
| rad31    | 1.01787e-32 | 1.000000 | 1.01787e-32 | 1.000000 |
| rad13    | 1.38313e-33 | 1.000000 | 1.38313e-33 | 1.000000 |
| rad9     | 8.94586e-34 | 1.000000 | 8.94586e-34 | 1.000000 |
| rad19syn | 6.95957e-35 | 1.000000 | 6.95957e-35 | 1.000000 |
| rad14    | 3.90543e-35 | 1.000000 | 3.90543e-35 | 1.000000 |
| rad25    | 2.57945e-35 | 1.000000 | 2.57945e-35 | 1.000000 |
| rad27    | 1.01578e-35 | 1.000000 | 1.01578e-35 | 1.000000 |
| rad33    | 2.63505e-36 | 1.000000 | 2.63505e-36 | 1.000000 |
| rad23    | 1.44129e-36 | 1.000000 | 1.44129e-36 | 1.000000 |
| rad15    | 4.05622e-37 | 1.000000 | 4.05622e-37 | 1.000000 |
| rad45    | 2.70876e-38 | 1.000000 | 2.70876e-38 | 1.000000 |
| rad5     | 5.91746e-39 | 1.000000 | 5.91746e-39 | 1.000000 |
| rad36    | 1.76502e-39 | 1.000000 | 1.76502e-39 | 1.000000 |
| rad12    | 2.84189e-40 | 1.000000 | 2.84189e-40 | 1.000000 |
| rad20    | 8.45482e-41 | 1.000000 | 8.45482e-41 | 1.000000 |
| rad21    | 8.02853e-41 | 1.000000 | 8.02853e-41 | 1.000000 |
| rad22    | 1.27486e-41 | 1.000000 | 1.27486e-41 | 1.000000 |
| rad18    | 1.60734e-43 | 1.000000 | 1.60734e-43 | 1.000000 |
| rad24    | 4.46364e-45 | 1.000000 | 4.46364e-45 | 1.000000 |
| rad8     | 3.73727e-61 | 1.000000 | 3.73727e-61 | 1.000000 |

0.100000000E-05 Pa, 300.00000 K

| Rate constant             | True (fraction)        | Effective (fraction)   |
|---------------------------|------------------------|------------------------|
| Total                     | 5.34809e-14 (1.00 )    | 5.34809e-14 (1.00 )    |
| Formation of rad19        | 5.34010e-14 (0.999 )   | 5.34010e-14 (0.999 )   |
| H-abstraction to cyc2enyl | 7.95823e-17 (0.00149 ) | 7.95823e-17 (0.00149 ) |
| H-abstraction to cyc1enyl | 3.44981e-19 (6.45e-06) | 3.44981e-19 (6.45e-06) |

| species                       | PYtrue      | Cumul    | PYeffective | Cumul    |
|-------------------------------|-------------|----------|-------------|----------|
| Indene+H                      | 0.997939    | 0.997939 | 0.997939    | 0.997939 |
| Benzene+cycloprop-2-enylidene | 0.00148805  | 0.999427 | 0.00148805  | 0.999427 |
| PhCHCCH2+H                    | 0.000529814 | 0.999957 | 0.000529814 | 0.999957 |
| PhCCH+CH3                     | 1.04615e-05 | 0.999968 | 1.04615e-05 | 0.999968 |
| C2H2+PhCH2                    | 9.96265e-06 | 0.999978 | 9.96265e-06 | 0.999978 |
| Benzene+cycloprop-1-enylidene | 6.45054e-06 | 0.999984 | 6.45054e-06 | 0.999984 |
| PhCCCH3+H                     | 6.36715e-06 | 0.999990 | 6.36715e-06 | 0.999990 |
| Ph+MeAc                       | 5.99826e-06 | 0.999996 | 5.99826e-06 | 0.999996 |
| rad67                         | 1.76909e-06 | 0.999998 | 1.76909e-06 | 0.999998 |
| Ph+Allene                     | 8.18996e-07 | 0.999999 | 8.18996e-07 | 0.999999 |
| rad35                         | 7.31807e-07 | 1.000000 | 7.31807e-07 | 1.000000 |
| PhCH2CCH+H                    | 1.62469e-07 | 1.000000 | 1.62469e-07 | 1.000000 |
| PAH7+H                        | 1.00667e-07 | 1.000000 | 1.00667e-07 | 1.000000 |
| rad37                         | 2.83206e-08 | 1.000000 | 2.83206e-08 | 1.000000 |
| rad39                         | 2.48351e-08 | 1.000000 | 2.48351e-08 | 1.000000 |
| rad30                         | 1.39398e-08 | 1.000000 | 1.39398e-08 | 1.000000 |
| PAH9+H                        | 1.67898e-09 | 1.000000 | 1.67898e-09 | 1.000000 |
| rad38                         | 7.72652e-10 | 1.000000 | 7.72652e-10 | 1.000000 |
| PhcycC3H3_A+H                 | 3.25290e-10 | 1.000000 | 3.25290e-10 | 1.000000 |
| PAH10+CH3                     | 2.37266e-10 | 1.000000 | 2.37266e-10 | 1.000000 |
| rad60syn                      | 1.06834e-10 | 1.000000 | 1.06834e-10 | 1.000000 |
| PAH3+H                        | 9.84715e-11 | 1.000000 | 9.84715e-11 | 1.000000 |
| rad60anti                     | 5.51572e-11 | 1.000000 | 5.51572e-11 | 1.000000 |
| rad46                         | 5.45644e-11 | 1.000000 | 5.45644e-11 | 1.000000 |
| rad59                         | 1.67258e-11 | 1.000000 | 1.67258e-11 | 1.000000 |
| PhcycC3H3_B+H                 | 1.05896e-11 | 1.000000 | 1.05896e-11 | 1.000000 |
| Phenyl+cycC3H4                | 8.20984e-12 | 1.000000 | 0.000000    | 1.000000 |
| rad54                         | 7.66783e-12 | 1.000000 | 7.66783e-12 | 1.000000 |
| rad43                         | 5.65558e-12 | 1.000000 | 5.65558e-12 | 1.000000 |
| rad62                         | 1.25276e-12 | 1.000000 | 1.25276e-12 | 1.000000 |
| rad50                         | 1.03316e-12 | 1.000000 | 1.03316e-12 | 1.000000 |
| rad70                         | 3.13392e-13 | 1.000000 | 3.13392e-13 | 1.000000 |
| PAH1+H                        | 1.93779e-13 | 1.000000 | 1.93779e-13 | 1.000000 |
| rad55                         | 1.33843e-13 | 1.000000 | 1.33843e-13 | 1.000000 |
| rad52                         | 1.45721e-14 | 1.000000 | 1.45721e-14 | 1.000000 |
| rad34                         | 1.28521e-14 | 1.000000 | 1.28521e-14 | 1.000000 |
| rad58                         | 1.11204e-14 | 1.000000 | 1.11204e-14 | 1.000000 |
| rad51                         | 8.23952e-15 | 1.000000 | 8.23952e-15 | 1.000000 |
| rad41                         | 3.58185e-15 | 1.000000 | 3.58185e-15 | 1.000000 |
| rad42                         | 1.81926e-15 | 1.000000 | 1.81926e-15 | 1.000000 |
| rad65                         | 2.32648e-16 | 1.000000 | 2.32648e-16 | 1.000000 |
| rad53                         | 1.29481e-16 | 1.000000 | 1.29481e-16 | 1.000000 |

|           |             |         |             |         |
|-----------|-------------|---------|-------------|---------|
| rad64     | 4.98973e-17 | 1.00000 | 4.98973e-17 | 1.00000 |
| rad61     | 2.74862e-17 | 1.00000 | 2.74862e-17 | 1.00000 |
| rad56     | 3.01521e-18 | 1.00000 | 3.01521e-18 | 1.00000 |
| rad68syn  | 3.96643e-19 | 1.00000 | 3.96643e-19 | 1.00000 |
| rad68anti | 2.85688e-19 | 1.00000 | 2.85688e-19 | 1.00000 |
| rad40syn  | 1.34588e-20 | 1.00000 | 1.34588e-20 | 1.00000 |
| rad40anti | 1.02810e-20 | 1.00000 | 1.02810e-20 | 1.00000 |
| PAH8+H    | 5.53972e-21 | 1.00000 | 5.53972e-21 | 1.00000 |
| rad73     | 6.54843e-22 | 1.00000 | 6.54843e-22 | 1.00000 |
| rad19anti | 1.46846e-22 | 1.00000 | 1.46846e-22 | 1.00000 |
| rad71     | 2.13406e-23 | 1.00000 | 2.13406e-23 | 1.00000 |
| rad6      | 4.38864e-24 | 1.00000 | 4.38864e-24 | 1.00000 |
| rad2      | 9.87167e-25 | 1.00000 | 9.87167e-25 | 1.00000 |
| rad1      | 7.43873e-26 | 1.00000 | 7.43873e-26 | 1.00000 |
| rad10     | 5.78127e-26 | 1.00000 | 5.78127e-26 | 1.00000 |
| rad3      | 1.41075e-26 | 1.00000 | 1.41075e-26 | 1.00000 |
| rad26     | 1.25369e-26 | 1.00000 | 1.25369e-26 | 1.00000 |
| rad9      | 1.00161e-26 | 1.00000 | 1.00161e-26 | 1.00000 |
| rad4      | 7.01572e-27 | 1.00000 | 7.01572e-27 | 1.00000 |
| rad28     | 3.44775e-27 | 1.00000 | 3.44775e-27 | 1.00000 |
| rad7      | 3.89342e-28 | 1.00000 | 3.89342e-28 | 1.00000 |
| rad23     | 2.43232e-28 | 1.00000 | 2.43232e-28 | 1.00000 |
| rad31     | 9.66297e-29 | 1.00000 | 9.66297e-29 | 1.00000 |
| rad11     | 9.28784e-29 | 1.00000 | 9.28784e-29 | 1.00000 |
| rad45     | 1.36162e-29 | 1.00000 | 1.36162e-29 | 1.00000 |
| rad19syn  | 1.12386e-29 | 1.00000 | 1.12386e-29 | 1.00000 |
| rad15     | 5.89512e-30 | 1.00000 | 5.89512e-30 | 1.00000 |
| rad72     | 4.67174e-30 | 1.00000 | 4.67174e-30 | 1.00000 |
| rad25     | 3.62032e-30 | 1.00000 | 3.62032e-30 | 1.00000 |
| rad14     | 2.59213e-30 | 1.00000 | 2.59213e-30 | 1.00000 |
| rad13     | 2.24572e-30 | 1.00000 | 2.24572e-30 | 1.00000 |
| rad47     | 1.77284e-30 | 1.00000 | 1.77284e-30 | 1.00000 |
| rad27     | 1.47512e-30 | 1.00000 | 1.47512e-30 | 1.00000 |
| rad36     | 4.64085e-31 | 1.00000 | 4.64085e-31 | 1.00000 |
| rad12     | 9.83376e-32 | 1.00000 | 9.83376e-32 | 1.00000 |
| rad33     | 1.77386e-32 | 1.00000 | 1.77386e-32 | 1.00000 |
| rad5      | 9.55128e-33 | 1.00000 | 9.55128e-33 | 1.00000 |
| rad22     | 1.79691e-33 | 1.00000 | 1.79691e-33 | 1.00000 |
| rad21     | 1.07699e-33 | 1.00000 | 1.07699e-33 | 1.00000 |
| rad20     | 6.34107e-34 | 1.00000 | 6.34107e-34 | 1.00000 |
| rad18     | 1.20426e-35 | 1.00000 | 1.20426e-35 | 1.00000 |
| rad24     | 4.94065e-37 | 1.00000 | 4.94065e-37 | 1.00000 |
| rad8      | 3.04177e-47 | 1.00000 | 3.04177e-47 | 1.00000 |

0.100000000E-05 Pa, 310.000000 K

| Rate constant             | True (fraction)        | Effective (fraction)   |
|---------------------------|------------------------|------------------------|
| Total                     | 5.92544e-14 (1.00 )    | 5.92544e-14 (1.00 )    |
| Formation of rad19        | 5.91462e-14 (0.998 )   | 5.91462e-14 (0.998 )   |
| H-abstraction to cyc2enyl | 1.07628e-16 (0.00182 ) | 1.07628e-16 (0.00182 ) |
| H-abstraction to cyclenyl | 5.62537e-19 (9.49e-06) | 5.62537e-19 (9.49e-06) |

| species                       | PYtrue      | Cumul    | PYeffective | Cumul    |
|-------------------------------|-------------|----------|-------------|----------|
| Indene+H                      | 0.997536    | 0.997536 | 0.997536    | 0.997536 |
| Benzene+cycloprop-2-enylidene | 0.00181637  | 0.999353 | 0.00181637  | 0.999353 |
| PhCHCCH2+H                    | 0.000599213 | 0.999952 | 0.000599213 | 0.999952 |
| PhCCH+CH3                     | 1.07899e-05 | 0.999963 | 1.07899e-05 | 0.999963 |
| C2H2+PhCH2                    | 9.94973e-06 | 0.999973 | 9.94973e-06 | 0.999973 |
| Benzene+cycloprop-1-enylidene | 9.49359e-06 | 0.999982 | 9.49359e-06 | 0.999982 |
| PhCCCH3+H                     | 6.92725e-06 | 0.999989 | 6.92725e-06 | 0.999989 |
| Ph+MeAc                       | 6.69436e-06 | 0.999996 | 6.69436e-06 | 0.999996 |
| rad67                         | 1.91404e-06 | 0.999998 | 1.91404e-06 | 0.999998 |
| Ph+Allene                     | 1.02854e-06 | 0.999999 | 1.02854e-06 | 0.999999 |
| rad35                         | 8.00939e-07 | 0.999999 | 8.00939e-07 | 0.999999 |
| PhCH2CCH+H                    | 1.75897e-07 | 1.000000 | 1.75897e-07 | 1.000000 |
| PAH7+H                        | 9.96917e-08 | 1.000000 | 9.96917e-08 | 1.000000 |
| rad37                         | 2.86985e-08 | 1.000000 | 2.86985e-08 | 1.000000 |
| rad39                         | 2.78945e-08 | 1.000000 | 2.78945e-08 | 1.000000 |
| rad30                         | 1.58794e-08 | 1.000000 | 1.58794e-08 | 1.000000 |
| PAH9+H                        | 1.63685e-09 | 1.000000 | 1.63685e-09 | 1.000000 |
| rad38                         | 8.60336e-10 | 1.000000 | 8.60336e-10 | 1.000000 |
| PhcycC3H3_A+H                 | 4.09102e-10 | 1.000000 | 4.09102e-10 | 1.000000 |
| PAH10+CH3                     | 2.45221e-10 | 1.000000 | 2.45221e-10 | 1.000000 |
| rad60syn                      | 1.25085e-10 | 1.000000 | 1.25085e-10 | 1.000000 |
| PAH3+H                        | 1.05828e-10 | 1.000000 | 1.05828e-10 | 1.000000 |
| rad60anti                     | 6.43937e-11 | 1.000000 | 6.43937e-11 | 1.000000 |
| rad46                         | 5.94068e-11 | 1.000000 | 5.94068e-11 | 1.000000 |
| rad59                         | 1.93817e-11 | 1.000000 | 1.93817e-11 | 1.000000 |

|                |             |          |             |          |
|----------------|-------------|----------|-------------|----------|
| PhcycC3H3_B+H  | 1.41415e-11 | 1.000000 | 1.41415e-11 | 1.000000 |
| Phenyl+cycC3H4 | 1.07882e-11 | 1.000000 | 0.000000    | 1.000000 |
| rad54          | 8.89606e-12 | 1.000000 | 8.89606e-12 | 1.000000 |
| rad43          | 6.83075e-12 | 1.000000 | 6.83075e-12 | 1.000000 |
| rad62          | 1.51159e-12 | 1.000000 | 1.51159e-12 | 1.000000 |
| rad50          | 1.17696e-12 | 1.000000 | 1.17696e-12 | 1.000000 |
| rad70          | 3.87563e-13 | 1.000000 | 3.87563e-13 | 1.000000 |
| PAH1+H         | 2.83537e-13 | 1.000000 | 2.83537e-13 | 1.000000 |
| rad55          | 1.69858e-13 | 1.000000 | 1.69858e-13 | 1.000000 |
| rad52          | 1.66060e-14 | 1.000000 | 1.66060e-14 | 1.000000 |
| rad34          | 1.64058e-14 | 1.000000 | 1.64058e-14 | 1.000000 |
| rad58          | 1.50872e-14 | 1.000000 | 1.50872e-14 | 1.000000 |
| rad51          | 1.01582e-14 | 1.000000 | 1.01582e-14 | 1.000000 |
| rad41          | 4.78440e-15 | 1.000000 | 4.78440e-15 | 1.000000 |
| rad42          | 2.42635e-15 | 1.000000 | 2.42635e-15 | 1.000000 |
| rad65          | 2.87409e-16 | 1.000000 | 2.87409e-16 | 1.000000 |
| rad53          | 1.82136e-16 | 1.000000 | 1.82136e-16 | 1.000000 |
| rad64          | 6.86553e-17 | 1.000000 | 6.86553e-17 | 1.000000 |
| rad61          | 3.85257e-17 | 1.000000 | 3.85257e-17 | 1.000000 |
| rad56          | 4.20810e-18 | 1.000000 | 4.20810e-18 | 1.000000 |
| rad68syn       | 5.79184e-19 | 1.000000 | 5.79184e-19 | 1.000000 |
| rad68anti      | 4.21603e-19 | 1.000000 | 4.21603e-19 | 1.000000 |
| rad40syn       | 1.84909e-20 | 1.000000 | 1.84909e-20 | 1.000000 |
| rad40anti      | 1.45861e-20 | 1.000000 | 1.45861e-20 | 1.000000 |
| PAH8+H         | 5.99119e-21 | 1.000000 | 5.99119e-21 | 1.000000 |
| rad73          | 7.86975e-22 | 1.000000 | 7.86975e-22 | 1.000000 |
| rad71          | 1.54165e-23 | 1.000000 | 1.54165e-23 | 1.000000 |
| rad19anti      | 1.86169e-25 | 1.000000 | 1.86169e-25 | 1.000000 |
| rad6           | 3.29103e-26 | 1.000000 | 3.29103e-26 | 1.000000 |
| rad2           | 2.93042e-28 | 1.000000 | 2.93042e-28 | 1.000000 |
| rad1           | 2.27782e-29 | 1.000000 | 2.27782e-29 | 1.000000 |
| rad10          | 1.52380e-29 | 1.000000 | 1.52380e-29 | 1.000000 |
| rad28          | 3.57308e-30 | 1.000000 | 3.57308e-30 | 1.000000 |
| rad26          | 3.39394e-30 | 1.000000 | 3.39394e-30 | 1.000000 |
| rad7           | 2.50130e-30 | 1.000000 | 2.50130e-30 | 1.000000 |
| rad3           | 1.21278e-30 | 1.000000 | 1.21278e-30 | 1.000000 |
| rad4           | 6.48154e-31 | 1.000000 | 6.48154e-31 | 1.000000 |
| rad11          | 6.04368e-31 | 1.000000 | 6.04368e-31 | 1.000000 |
| rad47          | 3.77537e-31 | 1.000000 | 3.77537e-31 | 1.000000 |
| rad31          | 1.07023e-31 | 1.000000 | 1.07023e-31 | 1.000000 |
| rad13          | 1.44139e-32 | 1.000000 | 1.44139e-32 | 1.000000 |
| rad9           | 1.14606e-32 | 1.000000 | 1.14606e-32 | 1.000000 |
| rad19syn       | 1.62279e-33 | 1.000000 | 1.62279e-33 | 1.000000 |
| rad14          | 5.79682e-35 | 1.000000 | 5.79682e-35 | 1.000000 |
| rad23          | 4.92829e-35 | 1.000000 | 4.92829e-35 | 1.000000 |
| rad25          | 3.31443e-35 | 1.000000 | 3.31443e-35 | 1.000000 |
| rad33          | 2.70709e-35 | 1.000000 | 2.70709e-35 | 1.000000 |
| rad27          | 2.42627e-35 | 1.000000 | 2.42627e-35 | 1.000000 |
| rad15          | 5.22624e-36 | 1.000000 | 5.22624e-36 | 1.000000 |
| rad45          | 1.17861e-36 | 1.000000 | 1.17861e-36 | 1.000000 |
| rad36          | 7.81431e-38 | 1.000000 | 7.81431e-38 | 1.000000 |
| rad5           | 5.55489e-39 | 1.000000 | 5.55489e-39 | 1.000000 |
| rad12          | 1.42818e-39 | 1.000000 | 1.42818e-39 | 1.000000 |
| rad20          | 3.89135e-40 | 1.000000 | 3.89135e-40 | 1.000000 |
| rad21          | 3.40281e-40 | 1.000000 | 3.40281e-40 | 1.000000 |
| rad22          | 3.16635e-40 | 1.000000 | 3.16635e-40 | 1.000000 |
| rad18          | 1.17022e-42 | 1.000000 | 1.17022e-42 | 1.000000 |
| rad24          | 1.71408e-44 | 1.000000 | 1.71408e-44 | 1.000000 |
| rad8           | 1.69031e-60 | 1.000000 | 1.69031e-60 | 1.000000 |

0.100000000E-05 Pa, 400.000000 K

=====

| Rate constant             | True (fraction)        | Effective (fraction)   |
|---------------------------|------------------------|------------------------|
| Total                     | 1.29463e-13 (1.00 )    | 1.29463e-13 (1.00 )    |
| Formation of rad19        | 1.28526e-13 (0.993 )   | 1.28526e-13 (0.993 )   |
| H-abstraction to cyc2enyl | 9.19357e-16 (0.00710 ) | 9.19357e-16 (0.00710 ) |
| H-abstraction to cyclenyl | 1.69485e-17 (0.000131) | 1.69485e-17 (0.000131) |

| species                       | PYtrue      | Cumul    | PYeffective | Cumul    |
|-------------------------------|-------------|----------|-------------|----------|
| Indene+H                      | 0.991683    | 0.991683 | 0.991683    | 0.991683 |
| Benzene+cycloprop-2-enylidene | 0.00710133  | 0.998784 | 0.00710133  | 0.998784 |
| PhCHCCH2+H                    | 0.00100586  | 0.999790 | 0.00100586  | 0.999790 |
| Benzene+cycloprop-1-enylidene | 0.000130914 | 0.999921 | 0.000130914 | 0.999921 |
| C2H2+PhCH2                    | 2.22468e-05 | 0.999943 | 2.22468e-05 | 0.999943 |
| PhCCH+CH3                     | 1.95098e-05 | 0.999963 | 1.95098e-05 | 0.999963 |
| Ph+MeAc                       | 1.45179e-05 | 0.999977 | 1.45179e-05 | 0.999977 |
| PhCCCH3+H                     | 1.31952e-05 | 0.999990 | 1.31952e-05 | 0.999990 |
| rad67                         | 4.22167e-06 | 0.999994 | 4.22167e-06 | 0.999994 |



|                |             |          |             |          |
|----------------|-------------|----------|-------------|----------|
| Ph+Allene      | 2.97391e-06 | 0.999997 | 2.97391e-06 | 0.999997 |
| rad35          | 1.68909e-06 | 0.999999 | 1.68909e-06 | 0.999999 |
| PhCH2CCH+H     | 6.93048e-07 | 1.000000 | 6.93048e-07 | 1.000000 |
| PAH7+H         | 2.89758e-07 | 1.000000 | 2.89758e-07 | 1.000000 |
| rad37          | 8.82205e-08 | 1.000000 | 8.82205e-08 | 1.000000 |
| rad39          | 7.05188e-08 | 1.000000 | 7.05188e-08 | 1.000000 |
| rad30          | 3.41246e-08 | 1.000000 | 3.41246e-08 | 1.000000 |
| PAH9+H         | 5.67069e-09 | 1.000000 | 5.67069e-09 | 1.000000 |
| PhcycC3H3_A+H  | 4.88900e-09 | 1.000000 | 4.88900e-09 | 1.000000 |
| rad38          | 3.07435e-09 | 1.000000 | 3.07435e-09 | 1.000000 |
| PAH10+CH3      | 1.94150e-09 | 1.000000 | 1.94150e-09 | 1.000000 |
| PAH3+H         | 5.34449e-10 | 1.000000 | 5.34449e-10 | 1.000000 |
| PhcycC3H3_B+H  | 4.15151e-10 | 1.000000 | 4.15151e-10 | 1.000000 |
| rad60syn       | 3.79130e-10 | 1.000000 | 3.79130e-10 | 1.000000 |
| rad46          | 2.31290e-10 | 1.000000 | 2.31290e-10 | 1.000000 |
| Phenyl+cycC3H4 | 2.22328e-10 | 1.000000 | 0.000000    | 1.000000 |
| rad60anti      | 2.01850e-10 | 1.000000 | 2.01850e-10 | 1.000000 |
| rad59          | 8.49299e-11 | 1.000000 | 8.49299e-11 | 1.000000 |
| rad54          | 6.39706e-11 | 1.000000 | 6.39706e-11 | 1.000000 |
| rad43          | 3.46932e-11 | 1.000000 | 3.46932e-11 | 1.000000 |
| rad50          | 8.28672e-12 | 1.000000 | 8.28672e-12 | 1.000000 |
| rad62          | 7.28467e-12 | 1.000000 | 7.28467e-12 | 1.000000 |
| rad70          | 3.85328e-12 | 1.000000 | 3.85328e-12 | 1.000000 |
| PAH1+H         | 3.61003e-12 | 1.000000 | 3.61003e-12 | 1.000000 |
| rad55          | 1.60055e-12 | 1.000000 | 1.60055e-12 | 1.000000 |
| rad34          | 2.43952e-13 | 1.000000 | 2.43952e-13 | 1.000000 |
| rad52          | 1.72576e-13 | 1.000000 | 1.72576e-13 | 1.000000 |
| rad58          | 1.69180e-13 | 1.000000 | 1.69180e-13 | 1.000000 |
| rad51          | 1.42864e-13 | 1.000000 | 1.42864e-13 | 1.000000 |
| rad41          | 6.83260e-14 | 1.000000 | 6.83260e-14 | 1.000000 |
| rad42          | 2.71734e-14 | 1.000000 | 2.71734e-14 | 1.000000 |
| rad53          | 6.88019e-15 | 1.000000 | 6.88019e-15 | 1.000000 |
| rad65          | 4.39173e-15 | 1.000000 | 4.39173e-15 | 1.000000 |
| rad61          | 3.43038e-15 | 1.000000 | 3.43038e-15 | 1.000000 |
| rad64          | 3.05834e-15 | 1.000000 | 3.05834e-15 | 1.000000 |
| rad56          | 5.30924e-16 | 1.000000 | 5.30924e-16 | 1.000000 |
| rad68syn       | 7.48244e-17 | 1.000000 | 7.48244e-17 | 1.000000 |
| rad68anti      | 5.24834e-17 | 1.000000 | 5.24834e-17 | 1.000000 |
| rad40syn       | 6.39129e-18 | 1.000000 | 6.39129e-18 | 1.000000 |
| PAH8+H         | 5.94551e-18 | 1.000000 | 5.94551e-18 | 1.000000 |
| rad40anti      | 4.74371e-18 | 1.000000 | 4.74371e-18 | 1.000000 |
| rad73          | 4.85676e-19 | 1.000000 | 4.85676e-19 | 1.000000 |
| rad19anti      | 4.76696e-19 | 1.000000 | 4.76696e-19 | 1.000000 |
| rad71          | 4.97335e-20 | 1.000000 | 4.97335e-20 | 1.000000 |
| rad6           | 4.94158e-21 | 1.000000 | 4.94158e-21 | 1.000000 |
| rad2           | 1.58860e-21 | 1.000000 | 1.58860e-21 | 1.000000 |
| rad23          | 1.57037e-22 | 1.000000 | 1.57037e-22 | 1.000000 |
| rad1           | 1.47850e-22 | 1.000000 | 1.47850e-22 | 1.000000 |
| rad10          | 8.98738e-23 | 1.000000 | 8.98738e-23 | 1.000000 |
| rad3           | 2.50446e-23 | 1.000000 | 2.50446e-23 | 1.000000 |
| rad45          | 2.33625e-23 | 1.000000 | 2.33625e-23 | 1.000000 |
| rad4           | 1.31933e-23 | 1.000000 | 1.31933e-23 | 1.000000 |
| rad9           | 3.90987e-24 | 1.000000 | 3.90987e-24 | 1.000000 |
| rad19syn       | 2.04434e-24 | 1.000000 | 2.04434e-24 | 1.000000 |
| rad36          | 9.01203e-25 | 1.000000 | 9.01203e-25 | 1.000000 |
| rad72          | 7.32149e-25 | 1.000000 | 7.32149e-25 | 1.000000 |
| rad26          | 6.62665e-25 | 1.000000 | 6.62665e-25 | 1.000000 |
| rad31          | 5.03677e-25 | 1.000000 | 5.03677e-25 | 1.000000 |
| rad7           | 4.48545e-25 | 1.000000 | 4.48545e-25 | 1.000000 |
| rad28          | 2.35475e-25 | 1.000000 | 2.35475e-25 | 1.000000 |
| rad11          | 1.02293e-25 | 1.000000 | 1.02293e-25 | 1.000000 |
| rad13          | 2.74489e-27 | 1.000000 | 2.74489e-27 | 1.000000 |
| rad15          | 2.42706e-27 | 1.000000 | 2.42706e-27 | 1.000000 |
| rad22          | 2.55739e-28 | 1.000000 | 2.55739e-28 | 1.000000 |
| rad12          | 1.89647e-28 | 1.000000 | 1.89647e-28 | 1.000000 |
| rad47          | 7.65193e-29 | 1.000000 | 7.65193e-29 | 1.000000 |
| rad25          | 1.14053e-29 | 1.000000 | 1.14053e-29 | 1.000000 |
| rad27          | 1.02426e-29 | 1.000000 | 1.02426e-29 | 1.000000 |
| rad14          | 8.44283e-30 | 1.000000 | 8.44283e-30 | 1.000000 |
| rad33          | 6.25028e-30 | 1.000000 | 6.25028e-30 | 1.000000 |
| rad21          | 4.49356e-32 | 1.000000 | 4.49356e-32 | 1.000000 |
| rad20          | 2.03662e-32 | 1.000000 | 2.03662e-32 | 1.000000 |
| rad5           | 8.96672e-33 | 1.000000 | 8.96672e-33 | 1.000000 |
| rad24          | 5.81560e-34 | 1.000000 | 5.81560e-34 | 1.000000 |
| rad18          | 1.23857e-34 | 1.000000 | 1.23857e-34 | 1.000000 |
| rad8           | 6.65008e-44 | 1.000000 | 6.65008e-44 | 1.000000 |

0.100000000E-05 Pa, 500.000000 K

=====

Rate constant | True (fraction) Effective (fraction)

|                           |                        |                        |
|---------------------------|------------------------|------------------------|
| Total                     | 2.52837e-13 (1.00 )    | 2.52837e-13 (1.00 )    |
| Formation of rad19        | 2.47941e-13 (0.981 )   | 2.47941e-13 (0.981 )   |
| H-abstraction to cyc2enyl | 4.69058e-15 (0.0186 )  | 4.69058e-15 (0.0186 )  |
| H-abstraction to cyclenyl | 2.05381e-16 (0.000812) | 2.05381e-16 (0.000812) |

| species                       | PYtrue      | Cumul    | PYeffective | Cumul    |
|-------------------------------|-------------|----------|-------------|----------|
| Indene+H                      | 0.978428    | 0.978428 | 0.978428    | 0.978428 |
| Benzene+cycloprop-2-enylidene | 0.0185518   | 0.996979 | 0.0185518   | 0.996979 |
| PhCHCCH2+H                    | 0.00202477  | 0.999004 | 0.00202477  | 0.999004 |
| Benzene+cycloprop-1-enylidene | 0.000812306 | 0.999816 | 0.000812306 | 0.999816 |
| C2H2+PhCH2                    | 5.13363e-05 | 0.999868 | 5.13363e-05 | 0.999868 |
| PhCCH+CH3                     | 3.71182e-05 | 0.999905 | 3.71182e-05 | 0.999905 |
| Ph+MeAc                       | 3.63101e-05 | 0.999941 | 3.63101e-05 | 0.999941 |
| PhCCCH3+H                     | 2.84449e-05 | 0.999970 | 2.84449e-05 | 0.999970 |
| Ph+Allene                     | 1.09470e-05 | 0.999981 | 1.09470e-05 | 0.999981 |
| rad67                         | 1.05822e-05 | 0.999991 | 1.05822e-05 | 0.999991 |
| rad35                         | 4.10935e-06 | 0.999995 | 4.10935e-06 | 0.999995 |
| PhCH2CCH+H                    | 2.95392e-06 | 0.999998 | 2.95392e-06 | 0.999998 |
| PAH7+H                        | 8.51564e-07 | 0.999999 | 8.51564e-07 | 0.999999 |
| rad37                         | 2.86678e-07 | 0.999999 | 2.86678e-07 | 0.999999 |
| rad39                         | 2.02118e-07 | 1.000000 | 2.02118e-07 | 1.000000 |
| rad30                         | 8.94923e-08 | 1.000000 | 8.94923e-08 | 1.000000 |
| PhcycC3H3_A+H                 | 5.02850e-08 | 1.000000 | 5.02850e-08 | 1.000000 |
| PAH9+H                        | 2.06879e-08 | 1.000000 | 2.06879e-08 | 1.000000 |
| PAH10+CH3                     | 1.44052e-08 | 1.000000 | 1.44052e-08 | 1.000000 |
| rad38                         | 1.31834e-08 | 1.000000 | 1.31834e-08 | 1.000000 |
| PhcycC3H3_B+H                 | 7.81107e-09 | 1.000000 | 7.81107e-09 | 1.000000 |
| Phenyl+cycC3H4                | 3.55660e-09 | 1.000000 | 0.000000    | 1.000000 |
| PAH3+H                        | 2.97649e-09 | 1.000000 | 2.97649e-09 | 1.000000 |
| rad60syn                      | 1.43183e-09 | 1.000000 | 1.43183e-09 | 1.000000 |
| rad46                         | 1.04913e-09 | 1.000000 | 1.04913e-09 | 1.000000 |
| rad60anti                     | 7.84373e-10 | 1.000000 | 7.84373e-10 | 1.000000 |
| rad54                         | 4.68691e-10 | 1.000000 | 4.68691e-10 | 1.000000 |
| rad59                         | 4.42102e-10 | 1.000000 | 4.42102e-10 | 1.000000 |
| rad43                         | 1.96278e-10 | 1.000000 | 1.96278e-10 | 1.000000 |
| rad50                         | 6.65687e-11 | 1.000000 | 6.65687e-11 | 1.000000 |
| PAH1+H                        | 4.68911e-11 | 1.000000 | 4.68911e-11 | 1.000000 |
| rad62                         | 3.77646e-11 | 1.000000 | 3.77646e-11 | 1.000000 |
| rad70                         | 3.76454e-11 | 1.000000 | 3.76454e-11 | 1.000000 |
| rad55                         | 1.50995e-11 | 1.000000 | 1.50995e-11 | 1.000000 |
| rad34                         | 3.22092e-12 | 1.000000 | 3.22092e-12 | 1.000000 |
| rad51                         | 2.08196e-12 | 1.000000 | 2.08196e-12 | 1.000000 |
| rad58                         | 2.05092e-12 | 1.000000 | 2.05092e-12 | 1.000000 |
| rad52                         | 1.88540e-12 | 1.000000 | 1.88540e-12 | 1.000000 |
| rad41                         | 8.63972e-13 | 1.000000 | 8.63972e-13 | 1.000000 |
| rad42                         | 2.74850e-13 | 1.000000 | 2.74850e-13 | 1.000000 |
| rad53                         | 1.70507e-13 | 1.000000 | 1.70507e-13 | 1.000000 |
| rad61                         | 1.40668e-13 | 1.000000 | 1.40668e-13 | 1.000000 |
| rad64                         | 7.73135e-14 | 1.000000 | 7.73135e-14 | 1.000000 |
| rad65                         | 6.64224e-14 | 1.000000 | 6.64224e-14 | 1.000000 |
| rad56                         | 2.62115e-14 | 1.000000 | 2.62115e-14 | 1.000000 |
| rad68syn                      | 3.88259e-15 | 1.000000 | 3.88259e-15 | 1.000000 |
| rad68anti                     | 2.67414e-15 | 1.000000 | 2.67414e-15 | 1.000000 |
| PAH8+H                        | 8.47559e-16 | 1.000000 | 8.47559e-16 | 1.000000 |
| rad40syn                      | 5.55783e-16 | 1.000000 | 5.55783e-16 | 1.000000 |
| rad40anti                     | 4.06573e-16 | 1.000000 | 4.06573e-16 | 1.000000 |
| rad73                         | 6.83536e-17 | 1.000000 | 6.83536e-17 | 1.000000 |
| rad19anti                     | 6.68017e-17 | 1.000000 | 6.68017e-17 | 1.000000 |
| rad71                         | 1.35737e-17 | 1.000000 | 1.35737e-17 | 1.000000 |
| rad6                          | 9.27924e-19 | 1.000000 | 9.27924e-19 | 1.000000 |
| rad23                         | 8.50942e-19 | 1.000000 | 8.50942e-19 | 1.000000 |
| rad2                          | 7.68217e-19 | 1.000000 | 7.68217e-19 | 1.000000 |
| rad45                         | 2.18380e-19 | 1.000000 | 2.18380e-19 | 1.000000 |
| rad1                          | 9.25577e-20 | 1.000000 | 9.25577e-20 | 1.000000 |
| rad10                         | 3.35554e-20 | 1.000000 | 3.35554e-20 | 1.000000 |
| rad19syn                      | 1.45990e-20 | 1.000000 | 1.45990e-20 | 1.000000 |
| rad3                          | 1.43600e-20 | 1.000000 | 1.43600e-20 | 1.000000 |
| rad36                         | 1.20122e-20 | 1.000000 | 1.20122e-20 | 1.000000 |
| rad4                          | 8.22617e-21 | 1.000000 | 8.22617e-21 | 1.000000 |
| rad9                          | 3.96448e-21 | 1.000000 | 3.96448e-21 | 1.000000 |
| rad72                         | 1.99205e-21 | 1.000000 | 1.99205e-21 | 1.000000 |
| rad31                         | 1.77645e-22 | 1.000000 | 1.77645e-22 | 1.000000 |
| rad7                          | 9.08158e-23 | 1.000000 | 9.08158e-23 | 1.000000 |
| rad26                         | 6.26484e-23 | 1.000000 | 6.26484e-23 | 1.000000 |
| rad28                         | 2.38847e-23 | 1.000000 | 2.38847e-23 | 1.000000 |
| rad11                         | 2.19998e-23 | 1.000000 | 2.19998e-23 | 1.000000 |
| rad15                         | 2.61615e-24 | 1.000000 | 2.61615e-24 | 1.000000 |
| rad12                         | 1.85163e-24 | 1.000000 | 1.85163e-24 | 1.000000 |

|       |             |          |             |          |
|-------|-------------|----------|-------------|----------|
| rad13 | 6.11832e-25 | 1.000000 | 6.11832e-25 | 1.000000 |
| rad22 | 4.89088e-25 | 1.000000 | 4.89088e-25 | 1.000000 |
| rad47 | 5.02583e-27 | 1.000000 | 5.02583e-27 | 1.000000 |
| rad33 | 1.57477e-27 | 1.000000 | 1.57477e-27 | 1.000000 |
| rad27 | 6.13289e-28 | 1.000000 | 6.13289e-28 | 1.000000 |
| rad14 | 1.80845e-28 | 1.000000 | 1.80845e-28 | 1.000000 |
| rad25 | 8.39084e-29 | 1.000000 | 8.39084e-29 | 1.000000 |
| rad21 | 9.00696e-30 | 1.000000 | 9.00696e-30 | 1.000000 |
| rad20 | 3.81555e-30 | 1.000000 | 3.81555e-30 | 1.000000 |
| rad24 | 1.78237e-30 | 1.000000 | 1.78237e-30 | 1.000000 |
| rad18 | 3.83035e-32 | 1.000000 | 3.83035e-32 | 1.000000 |
| rad5  | 1.06960e-32 | 1.000000 | 1.06960e-32 | 1.000000 |
| rad8  | 1.56286e-39 | 1.000000 | 1.56286e-39 | 1.000000 |

0.100000000E-05 Pa, 600.000000 K

| Rate constant             | True (fraction) |            | Effective (fraction) |            |
|---------------------------|-----------------|------------|----------------------|------------|
| Total                     | 4.35570e-13     | (1.00 )    | 4.35570e-13          | (1.00 )    |
| Formation of rad19        | 4.18892e-13     | (0.962 )   | 4.18892e-13          | (0.962 )   |
| H-abstraction to cyc2enyl | 1.54751e-14     | (0.0355 )  | 1.54751e-14          | (0.0355 )  |
| H-abstraction to cyclenyl | 1.20343e-15     | (0.00276 ) | 1.20343e-15          | (0.00276 ) |

  

| species                       | PYtrue      | Cumul    | PYeffective | Cumul    |
|-------------------------------|-------------|----------|-------------|----------|
| Indene+H                      | 0.957276    | 0.957276 | 0.957276    | 0.957276 |
| Benzene+cycloprop-2-enylidene | 0.0355285   | 0.992805 | 0.0355285   | 0.992805 |
| PhCHCCH2+H                    | 0.00402172  | 0.996826 | 0.00402172  | 0.996826 |
| Benzene+cycloprop-1-enylidene | 0.00276289  | 0.999589 | 0.00276289  | 0.999589 |
| C2H2+PhCH2                    | 0.000111945 | 0.999701 | 0.000111945 | 0.999701 |
| Ph+MeAc                       | 8.57420e-05 | 0.999787 | 8.57420e-05 | 0.999787 |
| PhCCH+CH3                     | 6.75064e-05 | 0.999854 | 6.75064e-05 | 0.999854 |
| PhCCCH3+H                     | 5.90383e-05 | 0.999913 | 5.90383e-05 | 0.999913 |
| Ph+Allene                     | 3.56628e-05 | 0.999949 | 3.56628e-05 | 0.999949 |
| rad67                         | 2.54029e-05 | 0.999975 | 2.54029e-05 | 0.999975 |
| PhCH2CCH+H                    | 1.09199e-05 | 0.999985 | 1.09199e-05 | 0.999985 |
| rad35                         | 9.63305e-06 | 0.999995 | 9.63305e-06 | 0.999995 |
| PAH7+H                        | 2.26706e-06 | 0.999997 | 2.26706e-06 | 0.999997 |
| rad37                         | 8.64904e-07 | 0.999998 | 8.64904e-07 | 0.999998 |
| rad39                         | 5.20249e-07 | 0.999999 | 5.20249e-07 | 0.999999 |
| PhcycC3H3_A+H                 | 3.56529e-07 | 0.999999 | 3.56529e-07 | 0.999999 |
| rad30                         | 2.27441e-07 | 0.999999 | 2.27441e-07 | 0.999999 |
| PAH10+CH3                     | 8.50920e-08 | 0.999999 | 8.50920e-08 | 0.999999 |
| PhcycC3H3_B+H                 | 8.43895e-08 | 0.999999 | 8.43895e-08 | 0.999999 |
| PAH9+H                        | 7.13070e-08 | 1.000000 | 7.13070e-08 | 1.000000 |
| rad38                         | 5.21311e-08 | 1.000000 | 5.21311e-08 | 1.000000 |
| Phenyl+cycC3H4                | 3.58023e-08 | 1.000000 | 0.000000    | 1.000000 |
| PAH3+H                        | 1.45691e-08 | 1.000000 | 1.45691e-08 | 1.000000 |
| rad60syn                      | 5.03972e-09 | 1.000000 | 5.03972e-09 | 1.000000 |
| rad46                         | 4.37621e-09 | 1.000000 | 4.37621e-09 | 1.000000 |
| rad60anti                     | 2.82886e-09 | 1.000000 | 2.82886e-09 | 1.000000 |
| rad54                         | 2.63022e-09 | 1.000000 | 2.63022e-09 | 1.000000 |
| rad59                         | 2.03126e-09 | 1.000000 | 2.03126e-09 | 1.000000 |
| rad43                         | 9.14301e-10 | 1.000000 | 9.14301e-10 | 1.000000 |
| rad50                         | 4.49074e-10 | 1.000000 | 4.49074e-10 | 1.000000 |
| PAH1+H                        | 4.05905e-10 | 1.000000 | 4.05905e-10 | 1.000000 |
| rad70                         | 2.63826e-10 | 1.000000 | 2.63826e-10 | 1.000000 |
| rad62                         | 1.58022e-10 | 1.000000 | 1.58022e-10 | 1.000000 |
| rad55                         | 1.01573e-10 | 1.000000 | 1.01573e-10 | 1.000000 |
| rad34                         | 2.81348e-11 | 1.000000 | 2.81348e-11 | 1.000000 |
| rad51                         | 2.21630e-11 | 1.000000 | 2.21630e-11 | 1.000000 |
| rad58                         | 1.79744e-11 | 1.000000 | 1.79744e-11 | 1.000000 |
| rad52                         | 1.61050e-11 | 1.000000 | 1.61050e-11 | 1.000000 |
| rad41                         | 7.27827e-12 | 1.000000 | 7.27827e-12 | 1.000000 |
| rad61                         | 2.69080e-12 | 1.000000 | 2.69080e-12 | 1.000000 |
| rad53                         | 2.26526e-12 | 1.000000 | 2.26526e-12 | 1.000000 |
| rad42                         | 1.88131e-12 | 1.000000 | 1.88131e-12 | 1.000000 |
| rad64                         | 9.96176e-13 | 1.000000 | 9.96176e-13 | 1.000000 |
| rad65                         | 7.15322e-13 | 1.000000 | 7.15322e-13 | 1.000000 |
| rad56                         | 5.47638e-13 | 1.000000 | 5.47638e-13 | 1.000000 |
| rad68syn                      | 8.54715e-14 | 1.000000 | 8.54715e-14 | 1.000000 |
| rad68anti                     | 5.81389e-14 | 1.000000 | 5.81389e-14 | 1.000000 |
| PAH8+H                        | 3.69240e-14 | 1.000000 | 3.69240e-14 | 1.000000 |
| rad40syn                      | 1.73285e-14 | 1.000000 | 1.73285e-14 | 1.000000 |
| rad40anti                     | 1.26417e-14 | 1.000000 | 1.26417e-14 | 1.000000 |
| rad73                         | 3.37835e-15 | 1.000000 | 3.37835e-15 | 1.000000 |
| rad71                         | 1.04446e-15 | 1.000000 | 1.04446e-15 | 1.000000 |
| rad19anti                     | 4.93441e-16 | 1.000000 | 4.93441e-16 | 1.000000 |
| rad23                         | 4.70536e-17 | 1.000000 | 4.70536e-17 | 1.000000 |
| rad2                          | 3.54627e-17 | 1.000000 | 3.54627e-17 | 1.000000 |

|          |             |          |             |          |
|----------|-------------|----------|-------------|----------|
| rad6     | 1.93151e-17 | 1.000000 | 1.93151e-17 | 1.000000 |
| rad45    | 1.26942e-17 | 1.000000 | 1.26942e-17 | 1.000000 |
| rad1     | 5.95388e-18 | 1.000000 | 5.95388e-18 | 1.000000 |
| rad9     | 5.76903e-18 | 1.000000 | 5.76903e-18 | 1.000000 |
| rad19syn | 1.52297e-18 | 1.000000 | 1.52297e-18 | 1.000000 |
| rad36    | 1.40143e-18 | 1.000000 | 1.40143e-18 | 1.000000 |
| rad10    | 9.54269e-19 | 1.000000 | 9.54269e-19 | 1.000000 |
| rad72    | 6.43937e-19 | 1.000000 | 6.43937e-19 | 1.000000 |
| rad3     | 6.06072e-19 | 1.000000 | 6.06072e-19 | 1.000000 |
| rad4     | 4.18381e-19 | 1.000000 | 4.18381e-19 | 1.000000 |
| rad12    | 1.38519e-20 | 1.000000 | 1.38519e-20 | 1.000000 |
| rad15    | 3.63220e-21 | 1.000000 | 3.63220e-21 | 1.000000 |
| rad31    | 3.24820e-21 | 1.000000 | 3.24820e-21 | 1.000000 |
| rad7     | 2.13084e-21 | 1.000000 | 2.13084e-21 | 1.000000 |
| rad26    | 9.68335e-22 | 1.000000 | 9.68335e-22 | 1.000000 |
| rad11    | 5.60166e-22 | 1.000000 | 5.60166e-22 | 1.000000 |
| rad28    | 4.03175e-22 | 1.000000 | 4.03175e-22 | 1.000000 |
| rad22    | 2.09375e-23 | 1.000000 | 2.09375e-23 | 1.000000 |
| rad13    | 1.70434e-23 | 1.000000 | 1.70434e-23 | 1.000000 |
| rad47    | 1.30363e-25 | 1.000000 | 1.30363e-25 | 1.000000 |
| rad33    | 5.34747e-26 | 1.000000 | 5.34747e-26 | 1.000000 |
| rad27    | 1.13860e-26 | 1.000000 | 1.13860e-26 | 1.000000 |
| rad24    | 9.88540e-27 | 1.000000 | 9.88540e-27 | 1.000000 |
| rad21    | 3.89951e-27 | 1.000000 | 3.89951e-27 | 1.000000 |
| rad14    | 2.43292e-27 | 1.000000 | 2.43292e-27 | 1.000000 |
| rad25    | 1.34554e-27 | 1.000000 | 1.34554e-27 | 1.000000 |
| rad20    | 9.10800e-28 | 1.000000 | 9.10800e-28 | 1.000000 |
| rad18    | 3.55979e-30 | 1.000000 | 3.55979e-30 | 1.000000 |
| rad5     | 1.77322e-32 | 1.000000 | 1.77322e-32 | 1.000000 |
| rad8     | 2.39366e-34 | 1.000000 | 2.39366e-34 | 1.000000 |

0.100000000E-05 Pa, 700.00000 K

| Rate constant             | True (fraction)        | Effective (fraction)   |
|---------------------------|------------------------|------------------------|
| Total                     | 6.91694e-13 (1.00 )    | 6.91694e-13 (1.00 )    |
| Formation of rad19        | 6.47922e-13 (0.937 )   | 6.47922e-13 (0.937 )   |
| H-abstraction to cyc2enyl | 3.91858e-14 (0.0567 )  | 3.91858e-14 (0.0567 )  |
| H-abstraction to cyc1enyl | 4.58543e-15 (0.00663 ) | 4.58542e-15 (0.00663 ) |

| species                       | PYtrue      | Cumul    | PYeffective | Cumul    |
|-------------------------------|-------------|----------|-------------|----------|
| Indene+H                      | 0.928261    | 0.928261 | 0.928261    | 0.928261 |
| Benzene+cycloprop-2-enylidene | 0.0566520   | 0.984913 | 0.0566520   | 0.984913 |
| PhCHCCH2+H                    | 0.00759850  | 0.992512 | 0.00759851  | 0.992512 |
| Benzene+cycloprop-1-enylidene | 0.00662927  | 0.999141 | 0.00662927  | 0.999141 |
| C2H2+PhCH2                    | 0.000223367 | 0.999364 | 0.000223367 | 0.999364 |
| Ph+MeAc                       | 0.000184762 | 0.999549 | 0.000184762 | 0.999549 |
| PhCCH+CH3                     | 0.000114475 | 0.999663 | 0.000114475 | 0.999663 |
| PhCCCH3+H                     | 0.000114174 | 0.999778 | 0.000114174 | 0.999778 |
| Ph+Allene                     | 9.86533e-05 | 0.999876 | 9.86533e-05 | 0.999876 |
| rad67                         | 5.61617e-05 | 0.999932 | 5.61618e-05 | 0.999932 |
| PhCH2CCH+H                    | 3.37385e-05 | 0.999966 | 3.37385e-05 | 0.999966 |
| rad35                         | 2.09201e-05 | 0.999987 | 2.09202e-05 | 0.999987 |
| PAH7+H                        | 5.25052e-06 | 0.999992 | 5.25052e-06 | 0.999992 |
| rad37                         | 2.31770e-06 | 0.999995 | 2.31770e-06 | 0.999995 |
| PhcycC3H3_A+H                 | 1.84668e-06 | 0.999997 | 1.84668e-06 | 0.999997 |
| rad39                         | 1.15814e-06 | 0.999998 | 1.15814e-06 | 0.999998 |
| PhcycC3H3_B+H                 | 5.97889e-07 | 0.999998 | 5.97889e-07 | 0.999998 |
| rad30                         | 5.35177e-07 | 0.999999 | 5.35177e-07 | 0.999999 |
| PAH10+CH3                     | 3.93624e-07 | 0.999999 | 3.93624e-07 | 0.999999 |
| Phenyl+cycC3H4                | 2.47273e-07 | 0.999999 | 0.00000     | 0.999999 |
| PAH9+H                        | 2.20558e-07 | 1.000000 | 2.20558e-07 | 0.999999 |
| rad38                         | 1.79348e-07 | 1.000000 | 1.79348e-07 | 1.000000 |
| PAH3+H                        | 5.98815e-08 | 1.000000 | 5.98815e-08 | 1.000000 |
| rad46                         | 1.59383e-08 | 1.000000 | 1.59383e-08 | 1.000000 |
| rad60syn                      | 1.57198e-08 | 1.000000 | 1.57198e-08 | 1.000000 |
| rad54                         | 1.11959e-08 | 1.000000 | 1.11959e-08 | 1.000000 |
| rad60anti                     | 9.00502e-09 | 1.000000 | 9.00502e-09 | 1.000000 |
| rad59                         | 7.88061e-09 | 1.000000 | 7.88061e-09 | 1.000000 |
| rad43                         | 3.45953e-09 | 1.000000 | 3.45953e-09 | 1.000000 |
| PAH1+H                        | 2.45995e-09 | 1.000000 | 2.45995e-09 | 1.000000 |
| rad50                         | 2.44563e-09 | 1.000000 | 2.44563e-09 | 1.000000 |
| rad70                         | 1.34938e-09 | 1.000000 | 1.34938e-09 | 1.000000 |
| rad62                         | 5.31170e-10 | 1.000000 | 5.31170e-10 | 1.000000 |
| rad55                         | 4.95201e-10 | 1.000000 | 4.95201e-10 | 1.000000 |
| rad51                         | 1.72653e-10 | 1.000000 | 1.72653e-10 | 1.000000 |
| rad34                         | 1.70511e-10 | 1.000000 | 1.70511e-10 | 1.000000 |
| rad58                         | 1.15481e-10 | 1.000000 | 1.15481e-10 | 1.000000 |
| rad52                         | 1.05442e-10 | 1.000000 | 1.05442e-10 | 1.000000 |

|           |             |          |             |          |
|-----------|-------------|----------|-------------|----------|
| rad41     | 4.33848e-11 | 1.000000 | 4.33848e-11 | 1.000000 |
| rad61     | 2.93831e-11 | 1.000000 | 2.93831e-11 | 1.000000 |
| rad53     | 1.83949e-11 | 1.000000 | 1.83949e-11 | 1.000000 |
| rad42     | 9.22818e-12 | 1.000000 | 9.22818e-12 | 1.000000 |
| rad64     | 7.68987e-12 | 1.000000 | 7.68987e-12 | 1.000000 |
| rad56     | 6.14022e-12 | 1.000000 | 6.14022e-12 | 1.000000 |
| rad65     | 5.56200e-12 | 1.000000 | 5.56200e-12 | 1.000000 |
| rad68syn  | 1.01762e-12 | 1.000000 | 1.01762e-12 | 1.000000 |
| PAH8+H    | 7.27467e-13 | 1.000000 | 7.27467e-13 | 1.000000 |
| rad68anti | 6.85898e-13 | 1.000000 | 6.85898e-13 | 1.000000 |
| rad40syn  | 2.67923e-13 | 1.000000 | 2.67923e-13 | 1.000000 |
| rad40anti | 1.96404e-13 | 1.000000 | 1.96404e-13 | 1.000000 |
| rad73     | 8.03977e-14 | 1.000000 | 8.03977e-14 | 1.000000 |
| rad71     | 3.42950e-14 | 1.000000 | 3.42950e-14 | 1.000000 |
| rad9      | 3.57413e-15 | 1.000000 | 3.57413e-15 | 1.000000 |
| rad19anti | 6.95729e-16 | 1.000000 | 6.95729e-16 | 1.000000 |
| rad23     | 2.27030e-16 | 1.000000 | 2.27030e-16 | 1.000000 |
| rad2      | 1.63884e-16 | 1.000000 | 1.63884e-16 | 1.000000 |
| rad6      | 6.33246e-17 | 1.000000 | 6.33246e-17 | 1.000000 |
| rad45     | 6.10742e-17 | 1.000000 | 6.10742e-17 | 1.000000 |
| rad72     | 5.61740e-17 | 1.000000 | 5.61740e-17 | 1.000000 |
| rad1      | 4.23023e-17 | 1.000000 | 4.23023e-17 | 1.000000 |
| rad12     | 1.17946e-17 | 1.000000 | 1.17946e-17 | 1.000000 |
| rad19syn  | 8.87889e-18 | 1.000000 | 8.87889e-18 | 1.000000 |
| rad36     | 8.76033e-18 | 1.000000 | 8.76033e-18 | 1.000000 |
| rad10     | 3.69261e-18 | 1.000000 | 3.69261e-18 | 1.000000 |
| rad3      | 2.51328e-18 | 1.000000 | 2.51328e-18 | 1.000000 |
| rad4      | 2.03784e-18 | 1.000000 | 2.03784e-18 | 1.000000 |
| rad15     | 1.50667e-18 | 1.000000 | 1.50667e-18 | 1.000000 |
| rad31     | 9.71078e-21 | 1.000000 | 9.71078e-21 | 1.000000 |
| rad7      | 8.08106e-21 | 1.000000 | 8.08107e-21 | 1.000000 |
| rad26     | 3.20264e-21 | 1.000000 | 3.20264e-21 | 1.000000 |
| rad11     | 2.28631e-21 | 1.000000 | 2.28631e-21 | 1.000000 |
| rad28     | 1.38277e-21 | 1.000000 | 1.38277e-21 | 1.000000 |
| rad22     | 1.06809e-22 | 1.000000 | 1.06809e-22 | 1.000000 |
| rad13     | 8.58006e-23 | 1.000000 | 8.58006e-23 | 1.000000 |
| rad24     | 2.00378e-23 | 1.000000 | 2.00378e-23 | 1.000000 |
| rad21     | 3.05575e-24 | 1.000000 | 3.05575e-24 | 1.000000 |
| rad47     | 1.29142e-24 | 1.000000 | 1.29142e-24 | 1.000000 |
| rad33     | 1.18223e-24 | 1.000000 | 1.18223e-24 | 1.000000 |
| rad20     | 4.82371e-25 | 1.000000 | 4.82371e-25 | 1.000000 |
| rad27     | 8.61470e-26 | 1.000000 | 8.61470e-26 | 1.000000 |
| rad25     | 4.94558e-26 | 1.000000 | 4.94558e-26 | 1.000000 |
| rad14     | 1.57907e-26 | 1.000000 | 1.57907e-26 | 1.000000 |
| rad18     | 6.39322e-29 | 1.000000 | 6.39322e-29 | 1.000000 |
| rad8      | 5.34063e-29 | 1.000000 | 5.34063e-29 | 1.000000 |
| rad5      | 4.56536e-32 | 1.000000 | 4.56536e-32 | 1.000000 |

0.100000000E-05 Pa, 800.000000 K

=====

| Rate constant             | True (fraction)       | Effective (fraction)  |
|---------------------------|-----------------------|-----------------------|
| Total                     | 1.03759e-12 (1.00 )   | 1.03758e-12 (1.00 )   |
| Formation of rad19        | 9.41065e-13 (0.907 )  | 9.41063e-13 (0.907 )  |
| H-abstraction to cyc2enyl | 8.32953e-14 (0.0803 ) | 8.32953e-14 (0.0803 ) |
| H-abstraction to cyclenyl | 1.32261e-14 (0.0127 ) | 1.32261e-14 (0.0127 ) |

| species                       | PYtrue      | Cumul    | PYeffective | Cumul    |
|-------------------------------|-------------|----------|-------------|----------|
| Indene+H                      | 0.891851    | 0.891851 | 0.891852    | 0.891852 |
| Benzene+cycloprop-2-enylidene | 0.0802780   | 0.972129 | 0.0802781   | 0.972130 |
| PhCHCCH2+H                    | 0.0134622   | 0.985591 | 0.0134623   | 0.985592 |
| Benzene+cycloprop-1-enylidene | 0.0127470   | 0.998338 | 0.0127470   | 0.998339 |
| C2H2+PhCH2                    | 0.000407098 | 0.998746 | 0.000407098 | 0.998747 |
| Ph+MeAc                       | 0.000361138 | 0.999107 | 0.000361137 | 0.999108 |
| Ph+Allene                     | 0.000232338 | 0.999339 | 0.000232338 | 0.999340 |
| PhCCCH3+H                     | 0.000203971 | 0.999543 | 0.000203971 | 0.999544 |
| PhCCH+CH3                     | 0.000180552 | 0.999724 | 0.000180553 | 0.999725 |
| rad67                         | 0.000113174 | 0.999837 | 0.000113174 | 0.999838 |
| PhCH2CCH+H                    | 8.77930e-05 | 0.999924 | 8.77932e-05 | 0.999925 |
| rad35                         | 4.16128e-05 | 0.999966 | 4.16129e-05 | 0.999967 |
| PAH7+H                        | 1.05800e-05 | 0.999977 | 1.05800e-05 | 0.999978 |
| PhcycC3H3_A+H                 | 7.41209e-06 | 0.999984 | 7.41210e-06 | 0.999985 |
| rad37                         | 5.46662e-06 | 0.999990 | 5.46663e-06 | 0.999991 |
| PhcycC3H3_B+H                 | 3.06124e-06 | 0.999993 | 3.06124e-06 | 0.999994 |
| rad39                         | 2.23427e-06 | 0.999995 | 2.23428e-06 | 0.999996 |
| PAH10+CH3                     | 1.45372e-06 | 0.999996 | 1.45373e-06 | 0.999997 |
| Phenyl+cycC3H4                | 1.26413e-06 | 0.999998 | 0.00000     | 0.999997 |
| rad30                         | 1.14933e-06 | 0.999999 | 1.14933e-06 | 0.999998 |
| PAH9+H                        | 6.06281e-07 | 0.999999 | 6.06282e-07 | 0.999999 |

|           |             |          |             |          |
|-----------|-------------|----------|-------------|----------|
| rad38     | 5.31254e-07 | 1.000000 | 5.31255e-07 | 1.000000 |
| PAH3+H    | 2.06534e-07 | 1.00000  | 2.06535e-07 | 1.000000 |
| rad46     | 5.03837e-08 | 1.00000  | 5.03838e-08 | 1.000000 |
| rad60syn  | 4.30113e-08 | 1.00000  | 4.30113e-08 | 1.000000 |
| rad54     | 3.72615e-08 | 1.00000  | 3.72615e-08 | 1.000000 |
| rad59     | 2.58004e-08 | 1.00000  | 2.58004e-08 | 1.000000 |
| rad60anti | 2.50612e-08 | 1.00000  | 2.50612e-08 | 1.000000 |
| PAH1+H    | 1.11102e-08 | 1.00000  | 1.11102e-08 | 1.000000 |
| rad50     | 1.08530e-08 | 1.00000  | 1.08530e-08 | 1.00000  |
| rad43     | 1.08255e-08 | 1.00000  | 1.08255e-08 | 1.00000  |
| rad70     | 5.27763e-09 | 1.00000  | 5.27763e-09 | 1.00000  |
| rad55     | 1.83174e-09 | 1.00000  | 1.83175e-09 | 1.00000  |
| rad62     | 1.46956e-09 | 1.00000  | 1.46956e-09 | 1.00000  |
| rad51     | 1.02140e-09 | 1.00000  | 1.02140e-09 | 1.00000  |
| rad34     | 7.64053e-10 | 1.00000  | 7.64054e-10 | 1.00000  |
| rad58     | 5.66064e-10 | 1.00000  | 5.66065e-10 | 1.00000  |
| rad52     | 5.41768e-10 | 1.00000  | 5.41769e-10 | 1.00000  |
| rad61     | 2.09071e-10 | 1.00000  | 2.09072e-10 | 1.00000  |
| rad41     | 1.94594e-10 | 1.00000  | 1.94595e-10 | 1.00000  |
| rad53     | 1.01501e-10 | 1.00000  | 1.01501e-10 | 1.00000  |
| rad56     | 4.31932e-11 | 1.00000  | 4.31933e-11 | 1.00000  |
| rad64     | 4.01362e-11 | 1.00000  | 4.01363e-11 | 1.00000  |
| rad42     | 3.44813e-11 | 1.00000  | 3.44814e-11 | 1.00000  |
| rad65     | 3.26029e-11 | 1.00000  | 3.26029e-11 | 1.00000  |
| PAH8+H    | 8.11495e-12 | 1.00000  | 8.11497e-12 | 1.00000  |
| rad68syn  | 7.66845e-12 | 1.00000  | 7.66845e-12 | 1.00000  |
| rad68anti | 5.13228e-12 | 1.00000  | 5.13229e-12 | 1.00000  |
| rad40syn  | 2.48636e-12 | 1.00000  | 2.48636e-12 | 1.00000  |
| rad40anti | 1.83893e-12 | 1.00000  | 1.83893e-12 | 1.00000  |
| rad73     | 1.11381e-12 | 1.00000  | 1.11381e-12 | 1.00000  |
| rad71     | 6.08038e-13 | 1.00000  | 6.08039e-13 | 1.00000  |
| rad9      | 2.91856e-13 | 1.00000  | 2.91857e-13 | 1.00000  |
| rad72     | 2.02035e-15 | 1.00000  | 2.02035e-15 | 1.00000  |
| rad12     | 6.62385e-16 | 1.00000  | 6.62386e-16 | 1.00000  |
| rad19anti | 6.02835e-16 | 1.00000  | 6.02835e-16 | 1.00000  |
| rad23     | 3.95305e-16 | 1.00000  | 3.95306e-16 | 1.00000  |
| rad2      | 2.46344e-16 | 1.00000  | 2.46344e-16 | 1.00000  |
| rad45     | 1.35096e-16 | 1.00000  | 1.35096e-16 | 1.00000  |
| rad6      | 7.95630e-17 | 1.00000  | 7.95632e-17 | 1.00000  |
| rad1      | 7.54669e-17 | 1.00000  | 7.54670e-17 | 1.00000  |
| rad15     | 7.21204e-17 | 1.00000  | 7.21205e-17 | 1.00000  |
| rad36     | 1.67592e-17 | 1.00000  | 1.67592e-17 | 1.00000  |
| rad19syn  | 1.44428e-17 | 1.00000  | 1.44428e-17 | 1.00000  |
| rad10     | 5.51716e-18 | 1.00000  | 5.51716e-18 | 1.00000  |
| rad3      | 3.27061e-18 | 1.00000  | 3.27061e-18 | 1.00000  |
| rad4      | 2.70583e-18 | 1.00000  | 2.70583e-18 | 1.00000  |
| rad31     | 1.51028e-20 | 1.00000  | 1.51028e-20 | 1.00000  |
| rad7      | 1.23763e-20 | 1.00000  | 1.23763e-20 | 1.00000  |
| rad26     | 4.44170e-21 | 1.00000  | 4.44171e-21 | 1.00000  |
| rad24     | 4.04465e-21 | 1.00000  | 4.04465e-21 | 1.00000  |
| rad11     | 3.76966e-21 | 1.00000  | 3.76967e-21 | 1.00000  |
| rad28     | 1.93451e-21 | 1.00000  | 1.93451e-21 | 1.00000  |
| rad21     | 1.34473e-21 | 1.00000  | 1.34473e-21 | 1.00000  |
| rad33     | 2.37263e-22 | 1.00000  | 2.37263e-22 | 1.00000  |
| rad20     | 2.16415e-22 | 1.00000  | 2.16415e-22 | 1.00000  |
| rad22     | 2.08364e-22 | 1.00000  | 2.08365e-22 | 1.00000  |
| rad13     | 2.05076e-22 | 1.00000  | 2.05076e-22 | 1.00000  |
| rad47     | 8.53940e-24 | 1.00000  | 8.53940e-24 | 1.00000  |
| rad27     | 3.78227e-24 | 1.00000  | 3.78227e-24 | 1.00000  |
| rad25     | 3.67555e-24 | 1.00000  | 3.67556e-24 | 1.00000  |
| rad8      | 2.39851e-24 | 1.00000  | 2.39851e-24 | 1.00000  |
| rad14     | 3.94169e-25 | 1.00000  | 3.94169e-25 | 1.00000  |
| rad18     | 9.59434e-28 | 1.00000  | 9.59434e-28 | 1.00000  |
| rad5      | 2.12539e-31 | 1.00000  | 2.12539e-31 | 1.00000  |

0.100000000E-05 Pa, 900.000000 K

| Rate constant             | True (fraction)       | Effective (fraction)  |
|---------------------------|-----------------------|-----------------------|
| Total                     | 1.49199e-12 (1.00 )   | 1.49199e-12 (1.00 )   |
| Formation of rad19        | 1.30395e-12 (0.874 )  | 1.30394e-12 (0.874 )  |
| H-abstraction to cyc2enyl | 1.56554e-13 (0.105 )  | 1.56554e-13 (0.105 )  |
| H-abstraction to cyc1enyl | 3.14892e-14 (0.0211 ) | 3.14890e-14 (0.0211 ) |

| species                       | PYtrue    | Cumul    | PYeffective | Cumul    |
|-------------------------------|-----------|----------|-------------|----------|
| Indene+H                      | 0.848699  | 0.848699 | 0.848703    | 0.848703 |
| Benzene+cycloprop-2-enylidene | 0.104929  | 0.953628 | 0.104930    | 0.953634 |
| PhCHCCH2+H                    | 0.0222941 | 0.975922 | 0.0222941   | 0.975928 |
| Benzene+cycloprop-1-enylidene | 0.0211054 | 0.997028 | 0.0211054   | 0.997033 |

|                |             |          |             |          |
|----------------|-------------|----------|-------------|----------|
| C2H2+PhCH2     | 0.000683868 | 0.997712 | 0.000683871 | 0.997717 |
| Ph+MeAc        | 0.000643403 | 0.998355 | 0.000643406 | 0.998360 |
| Ph+Allene      | 0.000474185 | 0.998829 | 0.000474187 | 0.998835 |
| PhCCCH3+H      | 0.000337156 | 0.999166 | 0.000337157 | 0.999172 |
| PhCCH+CH3      | 0.000266833 | 0.999433 | 0.000266834 | 0.999439 |
| rad67          | 0.000208252 | 0.999641 | 0.000208253 | 0.999647 |
| PhCH2CCH+H     | 0.000196562 | 0.999838 | 0.000196563 | 0.999843 |
| rad35          | 7.58728e-05 | 0.999914 | 7.58733e-05 | 0.999919 |
| PhcycC3H3_A+H  | 2.42103e-05 | 0.999938 | 2.42105e-05 | 0.999943 |
| PAH7+H         | 1.88375e-05 | 0.999957 | 1.88376e-05 | 0.999962 |
| PhcycC3H3_B+H  | 1.21561e-05 | 0.999969 | 1.21561e-05 | 0.999974 |
| rad37          | 1.14050e-05 | 0.999980 | 1.14050e-05 | 0.999986 |
| Phenyl+cycC3H4 | 5.07995e-06 | 0.999986 | 0.00000     | 0.999986 |
| PAH10+CH3      | 4.40461e-06 | 0.999990 | 4.40463e-06 | 0.999990 |
| rad39          | 3.79886e-06 | 0.999994 | 3.79888e-06 | 0.999994 |
| rad30          | 2.25163e-06 | 0.999996 | 2.25165e-06 | 0.999996 |
| PAH9+H         | 1.48864e-06 | 0.999997 | 1.48865e-06 | 0.999998 |
| rad38          | 1.36505e-06 | 0.999999 | 1.36505e-06 | 0.999999 |
| PAH3+H         | 6.06186e-07 | 0.999999 | 6.06189e-07 | 1.000000 |
| rad46          | 1.39482e-07 | 1.000000 | 1.39483e-07 | 1.000000 |
| rad60syn       | 1.03783e-07 | 1.000000 | 1.03784e-07 | 1.000000 |
| rad54          | 1.00666e-07 | 1.000000 | 1.00667e-07 | 1.000000 |
| rad59          | 7.22570e-08 | 1.000000 | 7.22573e-08 | 1.000000 |
| rad60anti      | 6.13421e-08 | 1.000000 | 6.13425e-08 | 1.000000 |
| rad50          | 4.00788e-08 | 1.000000 | 4.00791e-08 | 1.000000 |
| PAH1+H         | 3.94732e-08 | 1.000000 | 3.94734e-08 | 1.000000 |
| rad43          | 2.87031e-08 | 1.000000 | 2.87033e-08 | 1.000000 |
| rad70          | 1.65408e-08 | 1.000000 | 1.65408e-08 | 1.000000 |
| rad55          | 5.38699e-09 | 1.000000 | 5.38702e-09 | 1.000000 |
| rad51          | 4.77134e-09 | 1.000000 | 4.77137e-09 | 1.000000 |
| rad62          | 3.44637e-09 | 1.000000 | 3.44638e-09 | 1.000000 |
| rad34          | 2.67892e-09 | 1.000000 | 2.67894e-09 | 1.000000 |
| rad52          | 2.25237e-09 | 1.000000 | 2.25238e-09 | 1.000000 |
| rad58          | 2.20457e-09 | 1.000000 | 2.20458e-09 | 1.000000 |
| rad61          | 1.06256e-09 | 1.000000 | 1.06257e-09 | 1.000000 |
| rad41          | 6.91191e-10 | 1.000000 | 6.91194e-10 | 1.000000 |
| rad53          | 4.12665e-10 | 1.000000 | 4.12668e-10 | 1.000000 |
| rad56          | 2.12371e-10 | 1.000000 | 2.12372e-10 | 1.000000 |
| rad64          | 1.54860e-10 | 1.000000 | 1.54860e-10 | 1.000000 |
| rad65          | 1.50319e-10 | 1.000000 | 1.50320e-10 | 1.000000 |
| rad42          | 1.03376e-10 | 1.000000 | 1.03377e-10 | 1.000000 |
| PAH8+H         | 5.91171e-11 | 1.000000 | 5.91174e-11 | 1.000000 |
| rad68syn       | 4.07131e-11 | 1.000000 | 4.07134e-11 | 1.000000 |
| rad68anti      | 2.70946e-11 | 1.000000 | 2.70946e-11 | 1.000000 |
| rad40syn       | 1.56733e-11 | 1.000000 | 1.56733e-11 | 1.000000 |
| rad40anti      | 1.17159e-11 | 1.000000 | 1.17159e-11 | 1.000000 |
| rad73          | 1.01666e-11 | 1.000000 | 1.01667e-11 | 1.000000 |
| rad71          | 6.75145e-12 | 1.000000 | 6.75149e-12 | 1.000000 |
| rad9           | 2.46472e-12 | 1.000000 | 2.46474e-12 | 1.000000 |
| rad72          | 3.83063e-14 | 1.000000 | 3.83066e-14 | 1.000000 |
| rad12          | 4.04547e-15 | 1.000000 | 4.04549e-15 | 1.000000 |
| rad19anti      | 4.57501e-16 | 1.000000 | 4.57503e-16 | 1.000000 |
| rad23          | 4.44045e-16 | 1.000000 | 4.44047e-16 | 1.000000 |
| rad15          | 4.34598e-16 | 1.000000 | 4.34599e-16 | 1.000000 |
| rad2           | 2.41385e-16 | 1.000000 | 2.41386e-16 | 1.000000 |
| rad45          | 1.86564e-16 | 1.000000 | 1.86566e-16 | 1.000000 |
| rad1           | 7.36118e-17 | 1.000000 | 7.36122e-17 | 1.000000 |
| rad6           | 5.90603e-17 | 1.000000 | 5.90606e-17 | 1.000000 |
| rad36          | 2.09364e-17 | 1.000000 | 2.09365e-17 | 1.000000 |
| rad19syn       | 1.51735e-17 | 1.000000 | 1.51736e-17 | 1.000000 |
| rad10          | 5.13179e-18 | 1.000000 | 5.13182e-18 | 1.000000 |
| rad3           | 2.73930e-18 | 1.000000 | 2.73931e-18 | 1.000000 |
| rad4           | 2.27424e-18 | 1.000000 | 2.27426e-18 | 1.000000 |
| rad21          | 1.24312e-19 | 1.000000 | 1.24313e-19 | 1.000000 |
| rad24          | 8.13232e-20 | 1.000000 | 8.13237e-20 | 1.000000 |
| rad20          | 2.39353e-20 | 1.000000 | 2.39354e-20 | 1.000000 |
| rad31          | 1.88477e-20 | 1.000000 | 1.88478e-20 | 1.000000 |
| rad33          | 1.64394e-20 | 1.000000 | 1.64394e-20 | 1.000000 |
| rad7           | 1.19216e-20 | 1.000000 | 1.19216e-20 | 1.000000 |
| rad8           | 5.47269e-21 | 1.000000 | 5.47271e-21 | 1.000000 |
| rad11          | 3.89092e-21 | 1.000000 | 3.89094e-21 | 1.000000 |
| rad13          | 3.68435e-21 | 1.000000 | 3.68436e-21 | 1.000000 |
| rad26          | 3.55261e-21 | 1.000000 | 3.55263e-21 | 1.000000 |
| rad28          | 1.57580e-21 | 1.000000 | 1.57581e-21 | 1.000000 |
| rad22          | 2.62142e-22 | 1.000000 | 2.62144e-22 | 1.000000 |
| rad25          | 2.46143e-22 | 1.000000 | 2.46144e-22 | 1.000000 |
| rad27          | 2.21098e-22 | 1.000000 | 2.21100e-22 | 1.000000 |
| rad47          | 4.17543e-23 | 1.000000 | 4.17545e-23 | 1.000000 |
| rad14          | 1.66021e-23 | 1.000000 | 1.66022e-23 | 1.000000 |
| rad18          | 1.61649e-25 | 1.000000 | 1.61649e-25 | 1.000000 |

rad5 | 1.79557e-30 1.00000 | 1.79558e-30 1.00000

0.100000000E-05 Pa, 1000.00000 K

| Rate constant             | True (fraction)       | Effective (fraction)  |
|---------------------------|-----------------------|-----------------------|
| Total                     | 2.07591e-12 (1.00 )   | 2.07587e-12 (1.00 )   |
| Formation of rad19        | 1.74189e-12 (0.839 )  | 1.74186e-12 (0.839 )  |
| H-abstraction to cyc2enyl | 2.68753e-13 (0.129 )  | 2.68753e-13 (0.129 )  |
| H-abstraction to cyc1enyl | 6.52627e-14 (0.0314 ) | 6.52614e-14 (0.0314 ) |

| species                       | PYtrue      | Cumul    | PYeffective | Cumul    |
|-------------------------------|-------------|----------|-------------|----------|
| Indene+H                      | 0.799582    | 0.799582 | 0.799596    | 0.799596 |
| Benzene+cycloprop-2-enylidene | 0.129463    | 0.929045 | 0.129465    | 0.929061 |
| PhCHCCH2+H                    | 0.0345727   | 0.963618 | 0.0345733   | 0.963635 |
| Benzene+cycloprop-1-enylidene | 0.0314382   | 0.995056 | 0.0314381   | 0.995073 |
| C2H2+PhCH2                    | 0.00107013  | 0.996126 | 0.00107014  | 0.996143 |
| Ph+MeAc                       | 0.00105356  | 0.997180 | 0.00105357  | 0.997197 |
| Ph+Allene                     | 0.000856132 | 0.998036 | 0.000856147 | 0.998053 |
| PhCCCH3+H                     | 0.000518388 | 0.998554 | 0.000518396 | 0.998571 |
| PhCH2CCH+H                    | 0.000387329 | 0.998942 | 0.000387336 | 0.998958 |
| PhCCH+CH3                     | 0.000373412 | 0.999315 | 0.000373419 | 0.999332 |
| rad67                         | 0.000352154 | 0.999667 | 0.000352160 | 0.999684 |
| rad35                         | 0.000127506 | 0.999795 | 0.000127508 | 0.999812 |
| PhcycC3H3_A+H                 | 6.68787e-05 | 0.999862 | 6.68799e-05 | 0.999878 |
| PhcycC3H3_B+H                 | 3.94287e-05 | 0.999901 | 3.94293e-05 | 0.999918 |
| PAH7+H                        | 3.02070e-05 | 0.999931 | 3.02075e-05 | 0.999948 |
| rad37                         | 2.12565e-05 | 0.999953 | 2.12568e-05 | 0.999969 |
| Phenyl+cycC3H4                | 1.68078e-05 | 0.999969 | 0.00000     | 0.999969 |
| PAH10+CH3                     | 1.12446e-05 | 0.999981 | 1.12447e-05 | 0.999981 |
| rad39                         | 5.81024e-06 | 0.999986 | 5.81034e-06 | 0.999986 |
| rad30                         | 4.04406e-06 | 0.999990 | 4.04413e-06 | 0.999990 |
| PAH9+H                        | 3.29361e-06 | 0.999994 | 3.29367e-06 | 0.999994 |
| rad38                         | 3.08261e-06 | 0.999997 | 3.08266e-06 | 0.999997 |
| PAH3+H                        | 1.54070e-06 | 0.999998 | 1.54073e-06 | 0.999998 |
| rad46                         | 3.42239e-07 | 0.999999 | 3.42245e-07 | 0.999999 |
| rad54                         | 2.28520e-07 | 0.999999 | 2.28524e-07 | 0.999999 |
| rad60syn                      | 2.23169e-07 | 0.999999 | 2.23173e-07 | 0.999999 |
| rad59                         | 1.76070e-07 | 0.999999 | 1.76073e-07 | 0.999999 |
| rad60anti                     | 1.33518e-07 | 1.000000 | 1.33520e-07 | 0.999999 |
| rad50                         | 1.25826e-07 | 1.000000 | 1.25828e-07 | 1.000000 |
| PAH1+H                        | 1.15144e-07 | 1.000000 | 1.15145e-07 | 1.000000 |
| rad43                         | 6.59875e-08 | 1.000000 | 6.59887e-08 | 1.000000 |
| rad70                         | 4.32135e-08 | 1.000000 | 4.32143e-08 | 1.000000 |
| rad51                         | 1.82048e-08 | 1.000000 | 1.82051e-08 | 1.000000 |
| rad55                         | 1.31137e-08 | 1.000000 | 1.31139e-08 | 1.000000 |
| rad52                         | 7.79283e-09 | 1.000000 | 7.79297e-09 | 1.000000 |
| rad34                         | 7.69222e-09 | 1.000000 | 7.69236e-09 | 1.000000 |
| rad58                         | 7.06658e-09 | 1.000000 | 7.06670e-09 | 1.000000 |
| rad62                         | 7.03940e-09 | 1.000000 | 7.03953e-09 | 1.000000 |
| rad61                         | 4.12272e-09 | 1.000000 | 4.12278e-09 | 1.000000 |
| rad41                         | 2.02447e-09 | 1.000000 | 2.02451e-09 | 1.000000 |
| rad53                         | 1.31432e-09 | 1.000000 | 1.31434e-09 | 1.000000 |
| rad56                         | 7.88428e-10 | 1.000000 | 7.88442e-10 | 1.000000 |
| rad65                         | 5.65099e-10 | 1.000000 | 5.65110e-10 | 1.000000 |
| rad64                         | 4.71855e-10 | 1.000000 | 4.71863e-10 | 1.000000 |
| PAH8+H                        | 3.09749e-10 | 1.000000 | 3.09755e-10 | 1.000000 |
| rad42                         | 2.59222e-10 | 1.000000 | 2.59226e-10 | 1.000000 |
| rad68syn                      | 1.64237e-10 | 1.000000 | 1.64240e-10 | 1.000000 |
| rad68anti                     | 1.08793e-10 | 1.000000 | 1.08795e-10 | 1.000000 |
| rad40syn                      | 7.30616e-11 | 1.000000 | 7.30628e-11 | 1.000000 |
| rad73                         | 6.65984e-11 | 1.000000 | 6.65995e-11 | 1.000000 |
| rad40anti                     | 5.52183e-11 | 1.000000 | 5.52193e-11 | 1.000000 |
| rad71                         | 5.18856e-11 | 1.000000 | 5.18865e-11 | 1.000000 |
| rad9                          | 4.42115e-12 | 1.000000 | 4.42123e-12 | 1.000000 |
| rad72                         | 4.47183e-13 | 1.000000 | 4.47191e-13 | 1.000000 |
| rad12                         | 7.27751e-15 | 1.000000 | 7.27764e-15 | 1.000000 |
| rad15                         | 6.70932e-16 | 1.000000 | 6.70944e-16 | 1.000000 |
| rad23                         | 4.43769e-16 | 1.000000 | 4.43776e-16 | 1.000000 |
| rad19anti                     | 3.42048e-16 | 1.000000 | 3.42054e-16 | 1.000000 |
| rad45                         | 2.12597e-16 | 1.000000 | 2.12600e-16 | 1.000000 |
| rad2                          | 2.02385e-16 | 1.000000 | 2.02388e-16 | 1.000000 |
| rad1                          | 6.07912e-17 | 1.000000 | 6.07922e-17 | 1.000000 |
| rad6                          | 3.98379e-17 | 1.000000 | 3.98386e-17 | 1.000000 |
| rad36                         | 2.26435e-17 | 1.000000 | 2.26439e-17 | 1.000000 |
| rad19syn                      | 1.42443e-17 | 1.000000 | 1.42446e-17 | 1.000000 |
| rad10                         | 4.21987e-18 | 1.000000 | 4.21994e-18 | 1.000000 |
| rad21                         | 2.11576e-18 | 1.000000 | 2.11580e-18 | 1.000000 |
| rad3                          | 2.07376e-18 | 1.000000 | 2.07379e-18 | 1.000000 |



|       |             |          |             |          |
|-------|-------------|----------|-------------|----------|
| rad4  | 1.71541e-18 | 1.000000 | 1.71544e-18 | 1.000000 |
| rad8  | 6.27706e-19 | 1.000000 | 6.27717e-19 | 1.000000 |
| rad20 | 4.93245e-19 | 1.000000 | 4.93254e-19 | 1.000000 |
| rad24 | 3.61522e-19 | 1.000000 | 3.61528e-19 | 1.000000 |
| rad33 | 2.31462e-19 | 1.000000 | 2.31466e-19 | 1.000000 |
| rad13 | 2.20518e-19 | 1.000000 | 2.20522e-19 | 1.000000 |
| rad31 | 2.18570e-20 | 1.000000 | 2.18575e-20 | 1.000000 |
| rad11 | 1.39358e-20 | 1.000000 | 1.39361e-20 | 1.000000 |
| rad7  | 1.09801e-20 | 1.000000 | 1.09803e-20 | 1.000000 |
| rad25 | 7.69190e-21 | 1.000000 | 7.69203e-21 | 1.000000 |
| rad27 | 5.63066e-21 | 1.000000 | 5.63077e-21 | 1.000000 |
| rad26 | 2.54840e-21 | 1.000000 | 2.54845e-21 | 1.000000 |
| rad28 | 1.15308e-21 | 1.000000 | 1.15310e-21 | 1.000000 |
| rad14 | 4.01746e-22 | 1.000000 | 4.01753e-22 | 1.000000 |
| rad22 | 3.06437e-22 | 1.000000 | 3.06442e-22 | 1.000000 |
| rad47 | 1.62908e-22 | 1.000000 | 1.62911e-22 | 1.000000 |
| rad18 | 4.30012e-23 | 1.000000 | 4.30020e-23 | 1.000000 |
| rad5  | 3.00034e-29 | 1.000000 | 3.00040e-29 | 1.000000 |

0.100000000E-05 Pa, 1100.00000 K

| Rate constant             | True (fraction)       | Effective (fraction)  |
|---------------------------|-----------------------|-----------------------|
| Total                     | 2.81236e-12 (1.00 )   | 2.81222e-12 (1.00 )   |
| Formation of rad19        | 2.25993e-12 (0.804 )  | 2.25980e-12 (0.804 )  |
| H-abstraction to cyc2enyl | 4.30538e-13 (0.153 )  | 4.30538e-13 (0.153 )  |
| H-abstraction to cyclenyl | 1.21896e-13 (0.0433 ) | 1.21889e-13 (0.0433 ) |

| species                       | PYtrue      | Cumul    | PYeffective | Cumul    |
|-------------------------------|-------------|----------|-------------|----------|
| Indene+H                      | 0.745455    | 0.745455 | 0.745493    | 0.745493 |
| Benzene+cycloprop-2-enylidene | 0.153088    | 0.898543 | 0.153095    | 0.898588 |
| PhCHCCH2+H                    | 0.0504085   | 0.948951 | 0.0504110   | 0.948999 |
| Benzene+cycloprop-1-enylidene | 0.0433429   | 0.992294 | 0.0433425   | 0.992342 |
| Ph+MeAc                       | 0.00159989  | 0.993894 | 0.00159997  | 0.993942 |
| C2H2+PhCH2                    | 0.00157393  | 0.995468 | 0.00157401  | 0.995516 |
| Ph+Allene                     | 0.00139377  | 0.996862 | 0.00139384  | 0.996909 |
| PhCCCH3+H                     | 0.000746146 | 0.997608 | 0.000746184 | 0.997656 |
| PhCH2CCH+H                    | 0.000685299 | 0.998293 | 0.000685333 | 0.998341 |
| rad67                         | 0.000551509 | 0.998845 | 0.000551537 | 0.998892 |
| PhCCH+CH3                     | 0.000499927 | 0.999345 | 0.000499952 | 0.999392 |
| rad35                         | 0.000198904 | 0.999544 | 0.000198914 | 0.999591 |
| PhcycC3H3_A+H                 | 0.000160985 | 0.999705 | 0.000160994 | 0.999752 |
| PhcycC3H3_B+H                 | 0.000108569 | 0.999813 | 0.000108575 | 0.999861 |
| Phenyl+cycC3H4                | 4.74535e-05 | 0.999861 | 0.000000    | 0.999861 |
| PAH7+H                        | 4.44306e-05 | 0.999905 | 4.44328e-05 | 0.999905 |
| rad37                         | 3.57976e-05 | 0.999941 | 3.57993e-05 | 0.999941 |
| PAH10+CH3                     | 2.47740e-05 | 0.999966 | 2.47753e-05 | 0.999966 |
| rad39                         | 8.15502e-06 | 0.999974 | 8.15543e-06 | 0.999974 |
| rad30                         | 6.70503e-06 | 0.999981 | 6.70536e-06 | 0.999981 |
| PAH9+H                        | 6.62670e-06 | 0.999987 | 6.62703e-06 | 0.999987 |
| rad38                         | 6.20641e-06 | 0.999993 | 6.20672e-06 | 0.999994 |
| PAH3+H                        | 3.44988e-06 | 0.999997 | 3.45006e-06 | 0.999997 |
| rad46                         | 7.53032e-07 | 0.999998 | 7.53070e-07 | 0.999998 |
| rad54                         | 4.48842e-07 | 0.999998 | 4.48864e-07 | 0.999998 |
| rad60syn                      | 4.32688e-07 | 0.999998 | 4.32709e-07 | 0.999999 |
| rad59                         | 3.79560e-07 | 0.999999 | 3.79579e-07 | 0.999999 |
| rad50                         | 3.42341e-07 | 0.999999 | 3.42358e-07 | 0.999999 |
| PAH1+H                        | 2.85109e-07 | 0.999999 | 2.85123e-07 | 1.000000 |
| rad60anti                     | 2.61576e-07 | 1.000000 | 2.61589e-07 | 1.000000 |
| rad43                         | 1.34197e-07 | 1.000000 | 1.34204e-07 | 1.000000 |
| rad70                         | 9.71315e-08 | 1.000000 | 9.71362e-08 | 1.000000 |
| rad51                         | 5.83466e-08 | 1.000000 | 5.83495e-08 | 1.000000 |
| rad55                         | 2.73128e-08 | 1.000000 | 2.73142e-08 | 1.000000 |
| rad52                         | 2.29834e-08 | 1.000000 | 2.29845e-08 | 1.000000 |
| rad58                         | 1.92024e-08 | 1.000000 | 1.92034e-08 | 1.000000 |
| rad34                         | 1.87451e-08 | 1.000000 | 1.87461e-08 | 1.000000 |
| rad61                         | 1.28390e-08 | 1.000000 | 1.28397e-08 | 1.000000 |
| rad62                         | 1.28154e-08 | 1.000000 | 1.28161e-08 | 1.000000 |
| rad41                         | 5.04814e-09 | 1.000000 | 5.04840e-09 | 1.000000 |
| rad53                         | 3.43664e-09 | 1.000000 | 3.43682e-09 | 1.000000 |
| rad56                         | 2.33966e-09 | 1.000000 | 2.33978e-09 | 1.000000 |
| rad65                         | 1.78385e-09 | 1.000000 | 1.78394e-09 | 1.000000 |
| PAH8+H                        | 1.24981e-09 | 1.000000 | 1.24987e-09 | 1.000000 |
| rad64                         | 1.19311e-09 | 1.000000 | 1.19317e-09 | 1.000000 |
| rad42                         | 5.61778e-10 | 1.000000 | 5.61806e-10 | 1.000000 |
| rad68syn                      | 5.31777e-10 | 1.000000 | 5.31804e-10 | 1.000000 |
| rad68anti                     | 3.50889e-10 | 1.000000 | 3.50907e-10 | 1.000000 |
| rad73                         | 3.32910e-10 | 1.000000 | 3.32927e-10 | 1.000000 |
| rad71                         | 2.96145e-10 | 1.000000 | 2.96160e-10 | 1.000000 |

|           |             |         |             |         |
|-----------|-------------|---------|-------------|---------|
| rad40syn  | 2.67659e-10 | 1.00000 | 2.67672e-10 | 1.00000 |
| rad40anti | 2.04456e-10 | 1.00000 | 2.04466e-10 | 1.00000 |
| rad9      | 4.03954e-12 | 1.00000 | 4.03975e-12 | 1.00000 |
| rad72     | 3.56687e-12 | 1.00000 | 3.56704e-12 | 1.00000 |
| rad12     | 7.93739e-15 | 1.00000 | 7.93778e-15 | 1.00000 |
| rad15     | 5.76891e-16 | 1.00000 | 5.76919e-16 | 1.00000 |
| rad23     | 4.20579e-16 | 1.00000 | 4.20599e-16 | 1.00000 |
| rad19anti | 2.56276e-16 | 1.00000 | 2.56289e-16 | 1.00000 |
| rad45     | 2.19362e-16 | 1.00000 | 2.19373e-16 | 1.00000 |
| rad2      | 1.59979e-16 | 1.00000 | 1.59987e-16 | 1.00000 |
| rad1      | 4.72663e-17 | 1.00000 | 4.72687e-17 | 1.00000 |
| rad6      | 3.03242e-17 | 1.00000 | 3.03257e-17 | 1.00000 |
| rad36     | 2.28769e-17 | 1.00000 | 2.28781e-17 | 1.00000 |
| rad19syn  | 1.28391e-17 | 1.00000 | 1.28398e-17 | 1.00000 |
| rad21     | 9.63737e-18 | 1.00000 | 9.63784e-18 | 1.00000 |
| rad8      | 7.65078e-18 | 1.00000 | 7.65117e-18 | 1.00000 |
| rad10     | 3.39255e-18 | 1.00000 | 3.39272e-18 | 1.00000 |
| rad13     | 3.15556e-18 | 1.00000 | 3.15572e-18 | 1.00000 |
| rad20     | 2.48655e-18 | 1.00000 | 2.48667e-18 | 1.00000 |
| rad3      | 1.50532e-18 | 1.00000 | 1.50539e-18 | 1.00000 |
| rad4      | 1.23840e-18 | 1.00000 | 1.23847e-18 | 1.00000 |
| rad33     | 8.69060e-19 | 1.00000 | 8.69109e-19 | 1.00000 |
| rad24     | 7.72326e-19 | 1.00000 | 7.72364e-19 | 1.00000 |
| rad11     | 5.55622e-19 | 1.00000 | 5.55650e-19 | 1.00000 |
| rad25     | 7.88055e-20 | 1.00000 | 7.88094e-20 | 1.00000 |
| rad27     | 4.73302e-20 | 1.00000 | 4.73325e-20 | 1.00000 |
| rad7      | 2.86658e-20 | 1.00000 | 2.86672e-20 | 1.00000 |
| rad31     | 2.41068e-20 | 1.00000 | 2.41079e-20 | 1.00000 |
| rad18     | 4.94615e-21 | 1.00000 | 4.94639e-21 | 1.00000 |
| rad14     | 3.73376e-21 | 1.00000 | 3.73394e-21 | 1.00000 |
| rad26     | 1.88938e-21 | 1.00000 | 1.88946e-21 | 1.00000 |
| rad28     | 8.70748e-22 | 1.00000 | 8.70788e-22 | 1.00000 |
| rad47     | 5.24230e-22 | 1.00000 | 5.24256e-22 | 1.00000 |
| rad22     | 3.48009e-22 | 1.00000 | 3.48027e-22 | 1.00000 |
| rad5      | 9.34800e-28 | 1.00000 | 9.34848e-28 | 1.00000 |

0.100000000E-05 Pa, 1200.00000 K

| Rate constant             | True (fraction)       | Effective (fraction)  |
|---------------------------|-----------------------|-----------------------|
| Total                     | 3.72623e-12 (1.00 )   | 3.72576e-12 (1.00 )   |
| Formation of rad19        | 2.86288e-12 (0.768 )  | 2.86245e-12 (0.768 )  |
| H-abstraction to cyc2enyl | 6.53266e-13 (0.175 )  | 6.53266e-13 (0.175 )  |
| H-abstraction to cyclenyl | 2.10085e-13 (0.0564 ) | 2.10053e-13 (0.0564 ) |

| species                       | PYtrue      | Cumul    | PYeffective | Cumul    |
|-------------------------------|-------------|----------|-------------|----------|
| Indene+H                      | 0.687506    | 0.687506 | 0.687593    | 0.687593 |
| Benzene+cycloprop-2-enylidene | 0.175315    | 0.862821 | 0.175337    | 0.862930 |
| PhCHCCH2+H                    | 0.0694470   | 0.932268 | 0.0694557   | 0.932386 |
| Benzene+cycloprop-1-enylidene | 0.0563801   | 0.988648 | 0.0563786   | 0.988764 |
| Ph+MeAc                       | 0.00227272  | 0.990921 | 0.00227301  | 0.991037 |
| C2H2+PhCH2                    | 0.00219121  | 0.993112 | 0.00219148  | 0.993229 |
| Ph+Allene                     | 0.00207994  | 0.995192 | 0.00208020  | 0.995309 |
| PhCH2CCH+H                    | 0.00110691  | 0.996299 | 0.00110706  | 0.996416 |
| PhCCCH3+H                     | 0.00101200  | 0.997311 | 0.00101213  | 0.997428 |
| rad67                         | 0.000806305 | 0.998117 | 0.000806406 | 0.998235 |
| PhCCH+CH3                     | 0.000645716 | 0.998763 | 0.000645798 | 0.998880 |
| PhcycC3H3_A+H                 | 0.000345598 | 0.999109 | 0.000345641 | 0.999226 |
| rad35                         | 0.000290169 | 0.999399 | 0.000290206 | 0.999516 |
| PhcycC3H3_B+H                 | 0.000261273 | 0.999660 | 0.000261306 | 0.999778 |
| Phenyl+cycC3H4                | 0.000117514 | 0.999778 | 0.000000    | 0.999778 |
| PAH7+H                        | 6.09151e-05 | 0.999838 | 6.09229e-05 | 0.999839 |
| rad37                         | 5.50993e-05 | 0.999894 | 5.51063e-05 | 0.999894 |
| PAH10+CH3                     | 4.81021e-05 | 0.999942 | 4.81082e-05 | 0.999942 |
| PAH9+H                        | 1.22285e-05 | 0.999954 | 1.22300e-05 | 0.999954 |
| rad38                         | 1.12958e-05 | 0.999965 | 1.12972e-05 | 0.999965 |
| rad39                         | 1.06983e-05 | 0.999976 | 1.06996e-05 | 0.999976 |
| rad30                         | 1.03391e-05 | 0.999986 | 1.03403e-05 | 0.999986 |
| PAH3+H                        | 6.91379e-06 | 0.999993 | 6.91466e-06 | 0.999993 |
| rad46                         | 1.50176e-06 | 0.999995 | 1.50195e-06 | 0.999995 |
| rad50                         | 8.20642e-07 | 0.999995 | 8.20743e-07 | 0.999996 |
| rad54                         | 7.81497e-07 | 0.999996 | 7.81598e-07 | 0.999996 |
| rad60syn                      | 7.65102e-07 | 0.999997 | 7.65199e-07 | 0.999997 |
| rad59                         | 7.35018e-07 | 0.999998 | 7.35111e-07 | 0.999998 |
| PAH1+H                        | 6.15259e-07 | 0.999998 | 6.15337e-07 | 0.999998 |
| rad60anti                     | 4.66711e-07 | 0.999999 | 4.66769e-07 | 0.999999 |
| rad43                         | 2.45550e-07 | 0.999999 | 2.45581e-07 | 0.999999 |
| rad70                         | 1.92605e-07 | 0.999999 | 1.92629e-07 | 0.999999 |
| rad51                         | 1.60721e-07 | 0.999999 | 1.60741e-07 | 1.000000 |

|           |             |          |             |          |
|-----------|-------------|----------|-------------|----------|
| rad52     | 5.89508e-08 | 1.000000 | 5.89583e-08 | 1.000000 |
| rad55     | 4.99974e-08 | 1.000000 | 5.00038e-08 | 1.000000 |
| rad58     | 4.53331e-08 | 1.000000 | 4.53389e-08 | 1.000000 |
| rad34     | 3.98655e-08 | 1.000000 | 3.98705e-08 | 1.000000 |
| rad61     | 3.33579e-08 | 1.000000 | 3.33621e-08 | 1.000000 |
| rad62     | 2.11968e-08 | 1.000000 | 2.11994e-08 | 1.000000 |
| rad41     | 1.09917e-08 | 1.000000 | 1.09931e-08 | 1.000000 |
| rad53     | 7.65059e-09 | 1.000000 | 7.65156e-09 | 1.000000 |
| rad56     | 5.79402e-09 | 1.000000 | 5.79474e-09 | 1.000000 |
| rad65     | 4.84114e-09 | 1.000000 | 4.84175e-09 | 1.000000 |
| PAH8+H    | 4.08163e-09 | 1.000000 | 4.08215e-09 | 1.000000 |
| rad64     | 2.59994e-09 | 1.000000 | 2.60027e-09 | 1.000000 |
| rad68syn  | 1.43965e-09 | 1.000000 | 1.43983e-09 | 1.000000 |
| rad73     | 1.32831e-09 | 1.000000 | 1.32847e-09 | 1.000000 |
| rad71     | 1.32075e-09 | 1.000000 | 1.32091e-09 | 1.000000 |
| rad42     | 1.07985e-09 | 1.000000 | 1.07999e-09 | 1.000000 |
| rad68anti | 9.46805e-10 | 1.000000 | 9.46926e-10 | 1.000000 |
| rad40syn  | 8.05959e-10 | 1.000000 | 8.06061e-10 | 1.000000 |
| rad40anti | 6.21769e-10 | 1.000000 | 6.21848e-10 | 1.000000 |
| rad72     | 2.08613e-11 | 1.000000 | 2.08640e-11 | 1.000000 |
| rad9      | 2.93668e-12 | 1.000000 | 2.93705e-12 | 1.000000 |
| rad12     | 7.13600e-15 | 1.000000 | 7.13690e-15 | 1.000000 |
| rad15     | 4.52425e-16 | 1.000000 | 4.52483e-16 | 1.000000 |
| rad23     | 3.87576e-16 | 1.000000 | 3.87625e-16 | 1.000000 |
| rad45     | 2.14418e-16 | 1.000000 | 2.14446e-16 | 1.000000 |
| rad19anti | 1.93811e-16 | 1.000000 | 1.93836e-16 | 1.000000 |
| rad2      | 1.21942e-16 | 1.000000 | 1.21958e-16 | 1.000000 |
| rad1      | 3.58127e-17 | 1.000000 | 3.58172e-17 | 1.000000 |
| rad6      | 3.05604e-17 | 1.000000 | 3.05643e-17 | 1.000000 |
| rad8      | 2.53541e-17 | 1.000000 | 2.53574e-17 | 1.000000 |
| rad36     | 2.22523e-17 | 1.000000 | 2.22552e-17 | 1.000000 |
| rad21     | 2.06285e-17 | 1.000000 | 2.06311e-17 | 1.000000 |
| rad13     | 1.26207e-17 | 1.000000 | 1.26223e-17 | 1.000000 |
| rad19syn  | 1.13955e-17 | 1.000000 | 1.13970e-17 | 1.000000 |
| rad11     | 9.72758e-18 | 1.000000 | 9.72878e-18 | 1.000000 |
| rad20     | 5.30461e-18 | 1.000000 | 5.30528e-18 | 1.000000 |
| rad10     | 3.03792e-18 | 1.000000 | 3.03829e-18 | 1.000000 |
| rad33     | 1.49700e-18 | 1.000000 | 1.49719e-18 | 1.000000 |
| rad24     | 1.18501e-18 | 1.000000 | 1.18516e-18 | 1.000000 |
| rad3      | 1.06978e-18 | 1.000000 | 1.06991e-18 | 1.000000 |
| rad4      | 8.75783e-19 | 1.000000 | 8.75890e-19 | 1.000000 |
| rad7      | 6.91578e-19 | 1.000000 | 6.91665e-19 | 1.000000 |
| rad25     | 2.92600e-19 | 1.000000 | 2.92637e-19 | 1.000000 |
| rad18     | 1.64154e-19 | 1.000000 | 1.64175e-19 | 1.000000 |
| rad27     | 1.52386e-19 | 1.000000 | 1.52405e-19 | 1.000000 |
| rad31     | 2.55729e-20 | 1.000000 | 2.55762e-20 | 1.000000 |
| rad14     | 1.32731e-20 | 1.000000 | 1.32747e-20 | 1.000000 |
| rad26     | 1.92186e-21 | 1.000000 | 1.92210e-21 | 1.000000 |
| rad47     | 1.43379e-21 | 1.000000 | 1.43397e-21 | 1.000000 |
| rad28     | 7.12442e-22 | 1.000000 | 7.12532e-22 | 1.000000 |
| rad22     | 3.82824e-22 | 1.000000 | 3.82873e-22 | 1.000000 |
| rad5      | 4.49639e-26 | 1.000000 | 4.49696e-26 | 1.000000 |

0.100000000E-05 Pa, 1300.00000 K

| Rate constant             | True (fraction)      | Effective (fraction) |
|---------------------------|----------------------|----------------------|
| Total                     | 4.84401e-12 (1.00)   | 4.84262e-12 (1.00)   |
| Formation of rad19        | 3.55537e-12 (0.734)  | 3.55411e-12 (0.734)  |
| H-abstraction to cyc2enyl | 9.48893e-13 (0.196)  | 9.48893e-13 (0.196)  |
| H-abstraction to cyc1enyl | 3.39740e-13 (0.0701) | 3.39620e-13 (0.0701) |

| species                       | PYtrue      | Cumul    | PYeffective | Cumul    |
|-------------------------------|-------------|----------|-------------|----------|
| Indene+H                      | 0.627161    | 0.627161 | 0.627340    | 0.627340 |
| Benzene+cycloprop-2-enylidene | 0.195890    | 0.823052 | 0.195946    | 0.823286 |
| PhCHCCH2+H                    | 0.0908777   | 0.913929 | 0.0909037   | 0.914190 |
| Benzene+cycloprop-1-enylidene | 0.0701362   | 0.984065 | 0.0701313   | 0.984321 |
| Ph+MeAc                       | 0.00304441  | 0.987110 | 0.00304527  | 0.987366 |
| C2H2+PhCH2                    | 0.00290372  | 0.990014 | 0.00290454  | 0.990271 |
| Ph+Allene                     | 0.00288470  | 0.992898 | 0.00288553  | 0.993157 |
| PhCH2CCH+H                    | 0.00165448  | 0.994553 | 0.00165495  | 0.994812 |
| PhCCCH3+H                     | 0.00130153  | 0.995854 | 0.00130190  | 0.996113 |
| rad67                         | 0.00110883  | 0.996963 | 0.00110915  | 0.997223 |
| PhCCH+CH3                     | 0.000809514 | 0.997773 | 0.000809751 | 0.998032 |
| PhcycC3H3_A+H                 | 0.000673391 | 0.998446 | 0.000673584 | 0.998706 |
| PhcycC3H3_B+H                 | 0.000561394 | 0.999007 | 0.000561554 | 0.999267 |
| rad35                         | 0.000398725 | 0.999406 | 0.000398838 | 0.999666 |
| Phenyl+cycC3H4                | 0.000260506 | 0.999667 | 0.000000    | 0.999666 |
| PAH10+CH3                     | 8.38007e-05 | 0.999750 | 8.38250e-05 | 0.999750 |

|           |             |          |             |          |
|-----------|-------------|----------|-------------|----------|
| PAH7+H    | 7.89117e-05 | 0.999829 | 7.89341e-05 | 0.999829 |
| rad37     | 7.83568e-05 | 0.999908 | 7.83785e-05 | 0.999907 |
| PAH9+H    | 2.08511e-05 | 0.999929 | 2.08571e-05 | 0.999928 |
| rad38     | 1.88167e-05 | 0.999947 | 1.88221e-05 | 0.999947 |
| rad30     | 1.49360e-05 | 0.999962 | 1.49402e-05 | 0.999962 |
| rad39     | 1.33374e-05 | 0.999976 | 1.33412e-05 | 0.999975 |
| PAH3+H    | 1.25732e-05 | 0.999988 | 1.25768e-05 | 0.999988 |
| rad46     | 2.73965e-06 | 0.999991 | 2.74043e-06 | 0.999991 |
| rad50     | 1.75696e-06 | 0.999993 | 1.75746e-06 | 0.999992 |
| rad59     | 1.29584e-06 | 0.999994 | 1.29620e-06 | 0.999994 |
| rad60syn  | 1.24692e-06 | 0.999995 | 1.24728e-06 | 0.999995 |
| rad54     | 1.23055e-06 | 0.999996 | 1.23091e-06 | 0.999996 |
| PAH1+H    | 1.18164e-06 | 0.999998 | 1.18197e-06 | 0.999997 |
| rad60anti | 7.66599e-07 | 0.999998 | 7.66824e-07 | 0.999998 |
| rad43     | 4.10006e-07 | 0.999999 | 4.10123e-07 | 0.999999 |
| rad51     | 3.87406e-07 | 0.999999 | 3.87517e-07 | 0.999999 |
| rad70     | 3.43677e-07 | 1.000000 | 3.43775e-07 | 0.999999 |
| rad52     | 1.33628e-07 | 1.000000 | 1.33666e-07 | 0.999999 |
| rad58     | 9.48433e-08 | 1.000000 | 9.48705e-08 | 1.000000 |
| rad55     | 8.22139e-08 | 1.000000 | 8.22375e-08 | 1.000000 |
| rad34     | 7.56235e-08 | 1.000000 | 7.56447e-08 | 1.000000 |
| rad61     | 7.45086e-08 | 1.000000 | 7.45298e-08 | 1.000000 |
| rad62     | 3.23565e-08 | 1.000000 | 3.23657e-08 | 1.000000 |
| rad41     | 2.13212e-08 | 1.000000 | 2.13273e-08 | 1.000000 |
| rad53     | 1.49188e-08 | 1.000000 | 1.49231e-08 | 1.000000 |
| rad56     | 1.23746e-08 | 1.000000 | 1.23782e-08 | 1.000000 |
| rad65     | 1.15036e-08 | 1.000000 | 1.15069e-08 | 1.000000 |
| PAH8+H    | 1.11832e-08 | 1.000000 | 1.11864e-08 | 1.000000 |
| rad64     | 5.02551e-09 | 1.000000 | 5.02694e-09 | 1.000000 |
| rad71     | 4.76253e-09 | 1.000000 | 4.76388e-09 | 1.000000 |
| rad73     | 4.36513e-09 | 1.000000 | 4.36638e-09 | 1.000000 |
| rad68syn  | 3.35945e-09 | 1.000000 | 3.36041e-09 | 1.000000 |
| rad68anti | 2.20311e-09 | 1.000000 | 2.20373e-09 | 1.000000 |
| rad40syn  | 2.06131e-09 | 1.000000 | 2.06190e-09 | 1.000000 |
| rad42     | 1.87919e-09 | 1.000000 | 1.87972e-09 | 1.000000 |
| rad40anti | 1.60444e-09 | 1.000000 | 1.60490e-09 | 1.000000 |
| rad72     | 9.34613e-11 | 1.000000 | 9.34878e-11 | 1.000000 |
| rad9      | 1.94753e-12 | 1.000000 | 1.94809e-12 | 1.000000 |
| rad12     | 5.89852e-15 | 1.000000 | 5.90020e-15 | 1.000000 |
| rad15     | 9.87253e-16 | 1.000000 | 9.87537e-16 | 1.000000 |
| rad23     | 3.51917e-16 | 1.000000 | 3.52018e-16 | 1.000000 |
| rad45     | 2.02889e-16 | 1.000000 | 2.02948e-16 | 1.000000 |
| rad19anti | 1.48394e-16 | 1.000000 | 1.48436e-16 | 1.000000 |
| rad2      | 9.10597e-17 | 1.000000 | 9.10857e-17 | 1.000000 |
| rad11     | 5.69986e-17 | 1.000000 | 5.70148e-17 | 1.000000 |
| rad8      | 4.42248e-17 | 1.000000 | 4.42375e-17 | 1.000000 |
| rad6      | 4.12597e-17 | 1.000000 | 4.12715e-17 | 1.000000 |
| rad21     | 3.03536e-17 | 1.000000 | 3.03622e-17 | 1.000000 |
| rad1      | 2.68477e-17 | 1.000000 | 2.68553e-17 | 1.000000 |
| rad13     | 2.24559e-17 | 1.000000 | 2.24624e-17 | 1.000000 |
| rad36     | 2.11083e-17 | 1.000000 | 2.11144e-17 | 1.000000 |
| rad19syn  | 1.00706e-17 | 1.000000 | 1.00735e-17 | 1.000000 |
| rad7      | 8.19504e-18 | 1.000000 | 8.19740e-18 | 1.000000 |
| rad20     | 7.38165e-18 | 1.000000 | 7.38377e-18 | 1.000000 |
| rad10     | 7.11092e-18 | 1.000000 | 7.11295e-18 | 1.000000 |
| rad33     | 1.76734e-18 | 1.000000 | 1.76784e-18 | 1.000000 |
| rad18     | 1.53527e-18 | 1.000000 | 1.53571e-18 | 1.000000 |
| rad24     | 1.53474e-18 | 1.000000 | 1.53518e-18 | 1.000000 |
| rad3      | 7.53505e-19 | 1.000000 | 7.53716e-19 | 1.000000 |
| rad4      | 6.13752e-19 | 1.000000 | 6.13927e-19 | 1.000000 |
| rad25     | 5.66799e-19 | 1.000000 | 5.66960e-19 | 1.000000 |
| rad27     | 2.70871e-19 | 1.000000 | 2.70948e-19 | 1.000000 |
| rad31     | 2.62744e-20 | 1.000000 | 2.62819e-20 | 1.000000 |
| rad14     | 2.40834e-20 | 1.000000 | 2.40903e-20 | 1.000000 |
| rad26     | 1.32239e-20 | 1.000000 | 1.32277e-20 | 1.000000 |
| rad47     | 3.40948e-21 | 1.000000 | 3.41046e-21 | 1.000000 |
| rad28     | 8.24891e-22 | 1.000000 | 8.25127e-22 | 1.000000 |
| rad22     | 4.12523e-22 | 1.000000 | 4.12640e-22 | 1.000000 |
| rad5      | 2.46499e-24 | 1.000000 | 2.46570e-24 | 1.000000 |

0.100000000E-05 Pa, 1400.00000 K

=====

| Rate constant             | True (fraction)       | Effective (fraction)  |
|---------------------------|-----------------------|-----------------------|
| Total                     | 6.19360e-12 (1.00 )   | 6.18997e-12 (1.00 )   |
| Formation of rad19        | 4.34185e-12 (0.701 )  | 4.33861e-12 (0.701 )  |
| H-abstraction to cyc2enyl | 1.32990e-12 (0.215 )  | 1.32990e-12 (0.215 )  |
| H-abstraction to cyclenyl | 5.21850e-13 (0.0843 ) | 5.21461e-13 (0.0842 ) |

  

| species | PYtrue | Cumul | PYeffective | Cumul |
|---------|--------|-------|-------------|-------|
|---------|--------|-------|-------------|-------|

|                               |             |          |             |          |
|-------------------------------|-------------|----------|-------------|----------|
| Indene+H                      | 0.566028    | 0.566028 | 0.566360    | 0.566360 |
| Benzene+cycloprop-2-enylidene | 0.214721    | 0.780749 | 0.214847    | 0.781207 |
| PhCHCCH2+H                    | 0.113526    | 0.894275 | 0.113593    | 0.894800 |
| Benzene+cycloprop-1-enylidene | 0.0842564   | 0.978532 | 0.0842429   | 0.979043 |
| Ph+MeAc                       | 0.00387284  | 0.982405 | 0.00387511  | 0.982918 |
| Ph+Allene                     | 0.00376036  | 0.986165 | 0.00376256  | 0.986680 |
| C2H2+PhCH2                    | 0.00367929  | 0.989844 | 0.00368145  | 0.990362 |
| PhCH2CCH+H                    | 0.00231297  | 0.992157 | 0.00231433  | 0.992676 |
| PhCCCH3+H                     | 0.00159640  | 0.993754 | 0.00159734  | 0.994274 |
| rad67                         | 0.00144409  | 0.995198 | 0.00144494  | 0.995719 |
| PhcycC3H3_A+H                 | 0.00120489  | 0.996403 | 0.00120559  | 0.996924 |
| PhcycC3H3_B+H                 | 0.00109183  | 0.997495 | 0.00109247  | 0.998017 |
| PhCCH+CH3                     | 0.000988680 | 0.998483 | 0.000989264 | 0.999006 |
| Phenyl+cycC3H4                | 0.000523345 | 0.999007 | 0.000000    | 0.999006 |
| rad35                         | 0.000519418 | 0.999526 | 0.000519722 | 0.999526 |
| PAH10+CH3                     | 0.000132940 | 0.999659 | 0.000133019 | 0.999659 |
| rad37                         | 0.000103969 | 0.999763 | 0.000104030 | 0.999763 |
| PAH7+H                        | 9.76629e-05 | 0.999861 | 9.77202e-05 | 0.999860 |
| PAH9+H                        | 3.30451e-05 | 0.999894 | 3.30646e-05 | 0.999893 |
| rad38                         | 2.89869e-05 | 0.999923 | 2.90039e-05 | 0.999922 |
| PAH3+H                        | 2.09773e-05 | 0.999944 | 2.09896e-05 | 0.999943 |
| rad30                         | 2.03484e-05 | 0.999964 | 2.03603e-05 | 0.999964 |
| rad39                         | 1.60326e-05 | 0.999980 | 1.60420e-05 | 0.999980 |
| rad46                         | 4.60489e-06 | 0.999985 | 4.60759e-06 | 0.999984 |
| rad50                         | 3.39256e-06 | 0.999988 | 3.39455e-06 | 0.999988 |
| rad59                         | 2.10237e-06 | 0.999990 | 2.10360e-06 | 0.999990 |
| PAH1+H                        | 2.05214e-06 | 0.999992 | 2.05334e-06 | 0.999992 |
| rad60syn                      | 1.88965e-06 | 0.999994 | 1.89076e-06 | 0.999994 |
| rad54                         | 1.78086e-06 | 0.999996 | 1.78190e-06 | 0.999996 |
| rad60anti                     | 1.16973e-06 | 0.999997 | 1.17042e-06 | 0.999997 |
| rad51                         | 8.27129e-07 | 0.999998 | 8.27613e-07 | 0.999998 |
| rad43                         | 6.31782e-07 | 0.999998 | 6.32153e-07 | 0.999998 |
| rad70                         | 5.60217e-07 | 0.999999 | 5.60546e-07 | 0.999999 |
| rad52                         | 2.70713e-07 | 0.999999 | 2.70872e-07 | 0.999999 |
| rad58                         | 1.78428e-07 | 0.999999 | 1.78532e-07 | 0.999999 |
| rad61                         | 1.46277e-07 | 1.000000 | 1.46363e-07 | 0.999999 |
| rad34                         | 1.30056e-07 | 1.000000 | 1.30132e-07 | 1.000000 |
| rad55                         | 1.23571e-07 | 1.000000 | 1.23644e-07 | 1.000000 |
| rad62                         | 4.61529e-08 | 1.000000 | 4.61799e-08 | 1.000000 |
| rad41                         | 3.74002e-08 | 1.000000 | 3.74221e-08 | 1.000000 |
| PAH8+H                        | 2.63148e-08 | 1.000000 | 2.63303e-08 | 1.000000 |
| rad53                         | 2.60384e-08 | 1.000000 | 2.60537e-08 | 1.000000 |
| rad65                         | 2.42340e-08 | 1.000000 | 2.42482e-08 | 1.000000 |
| rad56                         | 2.33522e-08 | 1.000000 | 2.33659e-08 | 1.000000 |
| rad71                         | 1.41523e-08 | 1.000000 | 1.41606e-08 | 1.000000 |
| rad73                         | 1.20322e-08 | 1.000000 | 1.20393e-08 | 1.000000 |
| rad64                         | 8.79755e-09 | 1.000000 | 8.80273e-09 | 1.000000 |
| rad68syn                      | 6.90097e-09 | 1.000000 | 6.90502e-09 | 1.000000 |
| rad40syn                      | 4.57744e-09 | 1.000000 | 4.58013e-09 | 1.000000 |
| rad68anti                     | 4.51464e-09 | 1.000000 | 4.51729e-09 | 1.000000 |
| rad40anti                     | 3.59045e-09 | 1.000000 | 3.59256e-09 | 1.000000 |
| rad42                         | 3.00666e-09 | 1.000000 | 3.00843e-09 | 1.000000 |
| rad72                         | 3.28506e-10 | 1.000000 | 3.28699e-10 | 1.000000 |
| rad9                          | 1.24446e-12 | 1.000000 | 1.24519e-12 | 1.000000 |
| rad12                         | 4.68956e-15 | 1.000000 | 4.69231e-15 | 1.000000 |
| rad15                         | 3.64459e-15 | 1.000000 | 3.64673e-15 | 1.000000 |
| rad23                         | 3.16472e-16 | 1.000000 | 3.16658e-16 | 1.000000 |
| rad45                         | 1.87702e-16 | 1.000000 | 1.87812e-16 | 1.000000 |
| rad11                         | 1.44859e-16 | 1.000000 | 1.44943e-16 | 1.000000 |
| rad19anti                     | 1.15118e-16 | 1.000000 | 1.15186e-16 | 1.000000 |
| rad2                          | 6.73826e-17 | 1.000000 | 6.74221e-17 | 1.000000 |
| rad6                          | 5.98787e-17 | 1.000000 | 5.99139e-17 | 1.000000 |
| rad8                          | 5.66687e-17 | 1.000000 | 5.67019e-17 | 1.000000 |
| rad21                         | 3.67060e-17 | 1.000000 | 3.67275e-17 | 1.000000 |
| rad7                          | 3.48212e-17 | 1.000000 | 3.48416e-17 | 1.000000 |
| rad13                         | 2.61024e-17 | 1.000000 | 2.61177e-17 | 1.000000 |
| rad10                         | 2.48128e-17 | 1.000000 | 2.48274e-17 | 1.000000 |
| rad1                          | 2.00659e-17 | 1.000000 | 2.00776e-17 | 1.000000 |
| rad36                         | 1.96362e-17 | 1.000000 | 1.96478e-17 | 1.000000 |
| rad19syn                      | 8.90593e-18 | 1.000000 | 8.91116e-18 | 1.000000 |
| rad20                         | 8.28826e-18 | 1.000000 | 8.29310e-18 | 1.000000 |
| rad18                         | 5.37819e-18 | 1.000000 | 5.38134e-18 | 1.000000 |
| rad24                         | 1.80313e-18 | 1.000000 | 1.80420e-18 | 1.000000 |
| rad33                         | 1.72625e-18 | 1.000000 | 1.72727e-18 | 1.000000 |
| rad25                         | 7.72646e-19 | 1.000000 | 7.73097e-19 | 1.000000 |
| rad3                          | 5.29976e-19 | 1.000000 | 5.30287e-19 | 1.000000 |
| rad4                          | 4.28943e-19 | 1.000000 | 4.29194e-19 | 1.000000 |
| rad27                         | 3.50744e-19 | 1.000000 | 3.50950e-19 | 1.000000 |
| rad26                         | 2.24469e-19 | 1.000000 | 2.24601e-19 | 1.000000 |

|       |             |         |             |          |
|-------|-------------|---------|-------------|----------|
| rad14 | 3.02573e-20 | 1.00000 | 3.02750e-20 | 1.000000 |
| rad31 | 2.62635e-20 | 1.00000 | 2.62789e-20 | 1.000000 |
| rad47 | 7.15113e-21 | 1.00000 | 7.15531e-21 | 1.000000 |
| rad28 | 3.82333e-21 | 1.00000 | 3.82557e-21 | 1.000000 |
| rad22 | 1.24094e-21 | 1.00000 | 1.24166e-21 | 1.000000 |
| rad5  | 1.08556e-22 | 1.00000 | 1.08619e-22 | 1.000000 |

0.100000000E-05 Pa, 1500.00000 K

| Rate constant             | True (fraction)       | Effective (fraction)  |
|---------------------------|-----------------------|-----------------------|
| Total                     | 7.80417e-12 (1.00 )   | 7.79561e-12 (1.00 )   |
| Formation of rad19        | 5.22661e-12 (0.670 )  | 5.21915e-12 (0.669 )  |
| H-abstraction to cyc2enyl | 1.80920e-12 (0.232 )  | 1.80920e-12 (0.232 )  |
| H-abstraction to cyclenyl | 7.68359e-13 (0.0985 ) | 7.67262e-13 (0.0984 ) |

| species                       | PYtrue      | Cumul    | PYeffective | Cumul    |
|-------------------------------|-------------|----------|-------------|----------|
| Indene+H                      | 0.505870    | 0.505870 | 0.506425    | 0.506425 |
| Benzene+cycloprop-2-enylidene | 0.231825    | 0.737695 | 0.232079    | 0.738505 |
| PhCHCCH2+H                    | 0.135967    | 0.873662 | 0.136116    | 0.874621 |
| Benzene+cycloprop-1-enylidene | 0.0984549   | 0.972117 | 0.0984223   | 0.973043 |
| Ph+MeAc                       | 0.00470570  | 0.976823 | 0.00471086  | 0.977754 |
| Ph+Allene                     | 0.00464760  | 0.981470 | 0.00465271  | 0.982407 |
| C2H2+PhCH2                    | 0.00447301  | 0.985943 | 0.00447791  | 0.986885 |
| PhCH2CCH+H                    | 0.00304819  | 0.988991 | 0.00305154  | 0.989936 |
| PhcycC3H3_A+H                 | 0.00198976  | 0.990981 | 0.00199195  | 0.991928 |
| PhcycC3H3_B+H                 | 0.00193280  | 0.992914 | 0.00193492  | 0.993863 |
| PhCCCH3+H                     | 0.00187667  | 0.994791 | 0.00187873  | 0.995742 |
| rad67                         | 0.00179097  | 0.996582 | 0.00179294  | 0.997535 |
| PhCCH+CH3                     | 0.00117783  | 0.997759 | 0.00117912  | 0.998714 |
| Phenyl+cycC3H4                | 0.000956146 | 0.998716 | 0.000000    | 0.998714 |
| rad35                         | 0.000644848 | 0.999360 | 0.000645555 | 0.999360 |
| PAH10+CH3                     | 0.000194190 | 0.999555 | 0.000194404 | 0.999554 |
| rad37                         | 0.000129806 | 0.999684 | 0.000129949 | 0.999684 |
| PAH7+H                        | 0.000116417 | 0.999801 | 0.000116546 | 0.999800 |
| PAH9+H                        | 4.88535e-05 | 0.999850 | 4.89071e-05 | 0.999849 |
| rad38                         | 4.16011e-05 | 0.999891 | 4.16467e-05 | 0.999891 |
| PAH3+H                        | 3.23374e-05 | 0.999924 | 3.23729e-05 | 0.999923 |
| rad30                         | 2.62808e-05 | 0.999950 | 2.63097e-05 | 0.999950 |
| rad39                         | 1.87895e-05 | 0.999969 | 1.88102e-05 | 0.999968 |
| rad46                         | 7.16199e-06 | 0.999976 | 7.16986e-06 | 0.999976 |
| rad50                         | 5.93797e-06 | 0.999982 | 5.94449e-06 | 0.999982 |
| PAH1+H                        | 3.25722e-06 | 0.999985 | 3.26081e-06 | 0.999985 |
| rad59                         | 3.16156e-06 | 0.999988 | 3.16503e-06 | 0.999988 |
| rad60syn                      | 2.67968e-06 | 0.999991 | 2.68262e-06 | 0.999991 |
| rad54                         | 2.39838e-06 | 0.999993 | 2.40102e-06 | 0.999993 |
| rad60anti                     | 1.66867e-06 | 0.999995 | 1.67050e-06 | 0.999995 |
| rad51                         | 1.57342e-06 | 0.999996 | 1.57515e-06 | 0.999996 |
| rad43                         | 9.05576e-07 | 0.999997 | 9.06568e-07 | 0.999997 |
| rad70                         | 8.42763e-07 | 0.999998 | 8.43688e-07 | 0.999998 |
| rad52                         | 4.92950e-07 | 0.999999 | 4.93491e-07 | 0.999999 |
| rad58                         | 3.04448e-07 | 0.999999 | 3.04782e-07 | 0.999999 |
| rad61                         | 2.56145e-07 | 0.999999 | 2.56426e-07 | 0.999999 |
| rad34                         | 2.04934e-07 | 1.000000 | 2.05159e-07 | 0.999999 |
| rad55                         | 1.72012e-07 | 1.000000 | 1.72201e-07 | 1.000000 |
| rad62                         | 6.20586e-08 | 1.000000 | 6.21267e-08 | 1.000000 |
| rad41                         | 5.99063e-08 | 1.000000 | 5.99721e-08 | 1.000000 |
| PAH8+H                        | 5.38671e-08 | 1.000000 | 5.39262e-08 | 1.000000 |
| rad65                         | 4.55485e-08 | 1.000000 | 4.55985e-08 | 1.000000 |
| rad53                         | 4.12866e-08 | 1.000000 | 4.13319e-08 | 1.000000 |
| rad56                         | 3.95671e-08 | 1.000000 | 3.96105e-08 | 1.000000 |
| rad71                         | 3.49994e-08 | 1.000000 | 3.50378e-08 | 1.000000 |
| rad73                         | 2.80690e-08 | 1.000000 | 2.80998e-08 | 1.000000 |
| rad64                         | 1.41255e-08 | 1.000000 | 1.41409e-08 | 1.000000 |
| rad68syn                      | 1.26336e-08 | 1.000000 | 1.26475e-08 | 1.000000 |
| rad40syn                      | 8.93581e-09 | 1.000000 | 8.94564e-09 | 1.000000 |
| rad68anti                     | 8.24821e-09 | 1.000000 | 8.25726e-09 | 1.000000 |
| rad40anti                     | 7.05383e-09 | 1.000000 | 7.06153e-09 | 1.000000 |
| rad42                         | 4.46777e-09 | 1.000000 | 4.47268e-09 | 1.000000 |
| rad72                         | 9.20557e-10 | 1.000000 | 9.21571e-10 | 1.000000 |
| rad9                          | 7.87403e-13 | 1.000000 | 7.88267e-13 | 1.000000 |
| rad15                         | 7.48198e-15 | 1.000000 | 7.49021e-15 | 1.000000 |
| rad12                         | 3.66370e-15 | 1.000000 | 3.66772e-15 | 1.000000 |
| rad23                         | 2.81445e-16 | 1.000000 | 2.81754e-16 | 1.000000 |
| rad11                         | 2.20547e-16 | 1.000000 | 2.20789e-16 | 1.000000 |
| rad45                         | 1.70628e-16 | 1.000000 | 1.70815e-16 | 1.000000 |
| rad19anti                     | 9.04718e-17 | 1.000000 | 9.05717e-17 | 1.000000 |
| rad6                          | 8.57597e-17 | 1.000000 | 8.58538e-17 | 1.000000 |
| rad7                          | 7.03662e-17 | 1.000000 | 7.04433e-17 | 1.000000 |

|          |             |         |             |          |
|----------|-------------|---------|-------------|----------|
| rad8     | 6.24614e-17 | 1.00000 | 6.25299e-17 | 1.000000 |
| rad10    | 5.36034e-17 | 1.00000 | 5.36622e-17 | 1.000000 |
| rad2     | 4.97244e-17 | 1.00000 | 4.97790e-17 | 1.000000 |
| rad21    | 3.97611e-17 | 1.00000 | 3.98048e-17 | 1.000000 |
| rad13    | 2.43538e-17 | 1.00000 | 2.43805e-17 | 1.000000 |
| rad36    | 1.79657e-17 | 1.00000 | 1.79855e-17 | 1.000000 |
| rad1     | 1.50090e-17 | 1.00000 | 1.50255e-17 | 1.000000 |
| rad18    | 1.01390e-17 | 1.00000 | 1.01502e-17 | 1.000000 |
| rad20    | 8.29636e-18 | 1.00000 | 8.30546e-18 | 1.000000 |
| rad19syn | 7.89908e-18 | 1.00000 | 7.90771e-18 | 1.000000 |
| rad26    | 2.48963e-18 | 1.00000 | 2.49236e-18 | 1.000000 |
| rad24    | 1.99082e-18 | 1.00000 | 1.99301e-18 | 1.000000 |
| rad33    | 1.52243e-18 | 1.00000 | 1.52410e-18 | 1.000000 |
| rad25    | 8.67515e-19 | 1.00000 | 8.68467e-19 | 1.000000 |
| rad27    | 3.81185e-19 | 1.00000 | 3.81603e-19 | 1.000000 |
| rad3     | 3.73897e-19 | 1.00000 | 3.74308e-19 | 1.000000 |
| rad4     | 3.00078e-19 | 1.00000 | 3.00407e-19 | 1.000000 |
| rad28    | 4.09075e-20 | 1.00000 | 4.09525e-20 | 1.000000 |
| rad14    | 3.12704e-20 | 1.00000 | 3.13047e-20 | 1.000000 |
| rad22    | 3.06322e-20 | 1.00000 | 3.06658e-20 | 1.000000 |
| rad31    | 2.56266e-20 | 1.00000 | 2.56547e-20 | 1.000000 |
| rad47    | 1.33181e-20 | 1.00000 | 1.33327e-20 | 1.000000 |
| rad5     | 2.81897e-21 | 1.00000 | 2.82207e-21 | 1.000000 |

0.100000000E-06 Pa, 20.0000000 K

| Rate constant             | True (fraction)         | Effective (fraction)    |
|---------------------------|-------------------------|-------------------------|
| Total                     | 1.24541e-22 (1.00 )     | 1.24541e-22 (1.00 )     |
| Formation of rad19        | 1.24541e-22 (1.00 )     | 1.24541e-22 (1.00 )     |
| H-abstraction to cyc2enyl | 3.84323e-68 (3.09e-46)  | 3.84323e-68 (3.09e-46)  |
| H-abstraction to cyclenyl | 6.26313e-106 (5.03e-84) | 6.26313e-106 (5.03e-84) |

| species        | PYtrue      | Cumul    | PYeffective | Cumul    |
|----------------|-------------|----------|-------------|----------|
| Indene+H       | 0.999772    | 0.999772 | 0.999772    | 0.999772 |
| PhCHCCH2+H     | 0.000217190 | 0.999989 | 0.000217190 | 0.999989 |
| PhCCH+CH3      | 3.74993e-06 | 0.999993 | 3.74993e-06 | 0.999993 |
| C2H2+PhCH2     | 2.66078e-06 | 0.999996 | 2.66078e-06 | 0.999996 |
| PhCCCH3+H      | 2.10744e-06 | 0.999998 | 2.10744e-06 | 0.999998 |
| Ph+MeAc        | 1.55535e-06 | 0.999999 | 1.55535e-06 | 0.999999 |
| rad67          | 4.72017e-07 | 1.000000 | 4.72017e-07 | 1.000000 |
| rad35          | 2.09059e-07 | 1.000000 | 2.09059e-07 | 1.000000 |
| Ph+Allene      | 1.34639e-07 | 1.000000 | 1.34639e-07 | 1.000000 |
| PAH7+H         | 1.78373e-08 | 1.000000 | 1.78373e-08 | 1.000000 |
| PhCH2CCH+H     | 1.63595e-08 | 1.000000 | 1.63595e-08 | 1.000000 |
| rad39          | 5.03016e-09 | 1.000000 | 5.03016e-09 | 1.000000 |
| rad37          | 4.62673e-09 | 1.000000 | 4.62673e-09 | 1.000000 |
| rad30          | 3.90781e-09 | 1.000000 | 3.90781e-09 | 1.000000 |
| PAH9+H         | 2.53961e-10 | 1.000000 | 2.53961e-10 | 1.000000 |
| rad38          | 1.06938e-10 | 1.000000 | 1.06938e-10 | 1.000000 |
| rad60syn       | 1.69319e-11 | 1.000000 | 1.69319e-11 | 1.000000 |
| rad60anti      | 8.26560e-12 | 1.000000 | 8.26560e-12 | 1.000000 |
| PAH3+H         | 6.72155e-12 | 1.000000 | 6.72155e-12 | 1.000000 |
| rad46          | 6.42601e-12 | 1.000000 | 6.42601e-12 | 1.000000 |
| PAH10+CH3      | 5.52880e-12 | 1.000000 | 5.52880e-12 | 1.000000 |
| rad59          | 1.39467e-12 | 1.000000 | 1.39467e-12 | 1.000000 |
| PhcycC3H3_A+H  | 4.13677e-13 | 1.000000 | 4.13677e-13 | 1.000000 |
| rad43          | 2.58810e-13 | 1.000000 | 2.58810e-13 | 1.000000 |
| rad54          | 2.05785e-13 | 1.000000 | 2.05785e-13 | 1.000000 |
| rad62          | 5.54306e-14 | 1.000000 | 5.54306e-14 | 1.000000 |
| rad50          | 4.23315e-14 | 1.000000 | 4.23315e-14 | 1.000000 |
| rad70          | 3.14362e-15 | 1.000000 | 3.14362e-15 | 1.000000 |
| rad55          | 1.37812e-15 | 1.000000 | 1.37812e-15 | 1.000000 |
| PAH1+H         | 5.58593e-16 | 1.000000 | 5.58593e-16 | 1.000000 |
| rad52          | 2.67814e-16 | 1.000000 | 2.67814e-16 | 1.000000 |
| rad58          | 7.50233e-17 | 1.000000 | 7.50233e-17 | 1.000000 |
| rad51          | 6.49690e-17 | 1.000000 | 6.49690e-17 | 1.000000 |
| rad34          | 2.91050e-17 | 1.000000 | 2.91050e-17 | 1.000000 |
| Phenyl+cycC3H4 | 2.77347e-17 | 1.000000 | 0.000000    | 1.000000 |
| rad42          | 3.04830e-18 | 1.000000 | 3.04830e-18 | 1.000000 |
| rad41          | 2.76406e-18 | 1.000000 | 2.76406e-18 | 1.000000 |
| rad65          | 1.27714e-18 | 1.000000 | 1.27714e-18 | 1.000000 |
| rad6           | 2.62315e-30 | 1.000000 | 2.62315e-30 | 1.000000 |
| PhcycC3H3_B+H  | 2.48349e-30 | 1.000000 | 2.48349e-30 | 1.000000 |
| rad26          | 1.42188e-31 | 1.000000 | 1.42188e-31 | 1.000000 |
| rad53          | 1.11866e-31 | 1.000000 | 1.11866e-31 | 1.000000 |
| rad28          | 9.10063e-32 | 1.000000 | 9.10063e-32 | 1.000000 |
| rad47          | 5.36316e-32 | 1.000000 | 5.36316e-32 | 1.000000 |
| rad2           | 1.15557e-33 | 1.000000 | 1.15557e-33 | 1.000000 |

|                               |             |         |             |         |
|-------------------------------|-------------|---------|-------------|---------|
| rad64                         | 4.89184e-34 | 1.00000 | 4.89184e-34 | 1.00000 |
| rad7                          | 1.89239e-34 | 1.00000 | 1.89239e-34 | 1.00000 |
| rad1                          | 7.29939e-35 | 1.00000 | 7.29939e-35 | 1.00000 |
| rad10                         | 5.95259e-35 | 1.00000 | 5.95259e-35 | 1.00000 |
| rad11                         | 4.63414e-35 | 1.00000 | 4.63414e-35 | 1.00000 |
| rad14                         | 2.27043e-35 | 1.00000 | 2.27043e-35 | 1.00000 |
| rad25                         | 1.04537e-35 | 1.00000 | 1.04537e-35 | 1.00000 |
| rad3                          | 7.92787e-36 | 1.00000 | 7.92787e-36 | 1.00000 |
| rad4                          | 4.00416e-36 | 1.00000 | 4.00416e-36 | 1.00000 |
| rad27                         | 2.12641e-36 | 1.00000 | 2.12641e-36 | 1.00000 |
| rad19anti                     | 1.76071e-36 | 1.00000 | 1.76071e-36 | 1.00000 |
| rad13                         | 1.04510e-36 | 1.00000 | 1.04510e-36 | 1.00000 |
| rad9                          | 1.67379e-37 | 1.00000 | 1.67379e-37 | 1.00000 |
| rad5                          | 1.69449e-38 | 1.00000 | 1.69449e-38 | 1.00000 |
| rad33                         | 2.04461e-39 | 1.00000 | 2.04461e-39 | 1.00000 |
| rad31                         | 1.07208e-40 | 1.00000 | 1.07208e-40 | 1.00000 |
| rad15                         | 7.24853e-41 | 1.00000 | 7.24853e-41 | 1.00000 |
| rad61                         | 5.02959e-41 | 1.00000 | 5.02959e-41 | 1.00000 |
| rad20                         | 5.70213e-43 | 1.00000 | 5.70213e-43 | 1.00000 |
| rad21                         | 4.50927e-43 | 1.00000 | 4.50927e-43 | 1.00000 |
| rad56                         | 3.36948e-43 | 1.00000 | 3.36948e-43 | 1.00000 |
| rad18                         | 7.22231e-45 | 1.00000 | 7.22231e-45 | 1.00000 |
| rad12                         | 4.64410e-45 | 1.00000 | 4.64410e-45 | 1.00000 |
| rad68syn                      | 2.54027e-45 | 1.00000 | 2.54027e-45 | 1.00000 |
| rad68anti                     | 2.17402e-45 | 1.00000 | 2.17402e-45 | 1.00000 |
| rad23                         | 4.09208e-46 | 1.00000 | 4.09208e-46 | 1.00000 |
| Benzene+cycloprop-2-enylidene | 3.08591e-46 | 1.00000 | 3.08591e-46 | 1.00000 |
| rad19syn                      | 1.37416e-46 | 1.00000 | 1.37416e-46 | 1.00000 |
| rad22                         | 4.54028e-47 | 1.00000 | 4.54028e-47 | 1.00000 |
| rad45                         | 2.60497e-48 | 1.00000 | 2.60497e-48 | 1.00000 |
| rad24                         | 7.36012e-49 | 1.00000 | 7.36012e-49 | 1.00000 |
| rad36                         | 1.59772e-49 | 1.00000 | 1.59772e-49 | 1.00000 |
| rad73                         | 2.07005e-53 | 1.00000 | 2.07005e-53 | 1.00000 |
| rad40syn                      | 2.93459e-54 | 1.00000 | 2.93459e-54 | 1.00000 |
| rad40anti                     | 2.41838e-54 | 1.00000 | 2.41838e-54 | 1.00000 |
| PAH8+H                        | 1.12088e-58 | 1.00000 | 1.12088e-58 | 1.00000 |
| rad71                         | 3.49403e-62 | 1.00000 | 3.49403e-62 | 1.00000 |
| rad8                          | 2.40364e-66 | 1.00000 | 2.40364e-66 | 1.00000 |
| Benzene+cycloprop-1-enylidene | 5.02895e-84 | 1.00000 | 5.02895e-84 | 1.00000 |

0.100000000E-06 Pa, 30.0000000 K

| Rate constant             | True (fraction)        | Effective (fraction)   |
|---------------------------|------------------------|------------------------|
| Total                     | 8.13009e-20 (1.00 )    | 8.13009e-20 (1.00 )    |
| Formation of rad19        | 8.13009e-20 (1.00 )    | 8.13009e-20 (1.00 )    |
| H-abstraction to cyc2enyl | 1.08880e-49 (1.34e-30) | 1.08880e-49 (1.34e-30) |
| H-abstraction to cyclenyl | 7.55172e-75 (9.29e-56) | 7.55172e-75 (9.29e-56) |

| species       | PYtrue      | Cumul    | PYeffective | Cumul    |
|---------------|-------------|----------|-------------|----------|
| Indene+H      | 0.999770    | 0.999770 | 0.999770    | 0.999770 |
| PhCHCCH2+H    | 0.000218740 | 0.999989 | 0.000218740 | 0.999989 |
| PhCCH+CH3     | 3.77922e-06 | 0.999993 | 3.77922e-06 | 0.999993 |
| C2H2+PhCH2    | 2.68544e-06 | 0.999995 | 2.68544e-06 | 0.999995 |
| PhCCCH3+H     | 2.12543e-06 | 0.999997 | 2.12543e-06 | 0.999997 |
| Ph+MeAc       | 1.57151e-06 | 0.999999 | 1.57151e-06 | 0.999999 |
| rad67         | 4.76660e-07 | 0.999999 | 4.76660e-07 | 0.999999 |
| rad35         | 2.11031e-07 | 1.000000 | 2.11031e-07 | 1.000000 |
| Ph+Allene     | 1.36499e-07 | 1.000000 | 1.36499e-07 | 1.000000 |
| PAH7+H        | 1.80489e-08 | 1.000000 | 1.80489e-08 | 1.000000 |
| PhCH2CCH+H    | 1.66215e-08 | 1.000000 | 1.66215e-08 | 1.000000 |
| rad39         | 5.09007e-09 | 1.000000 | 5.09007e-09 | 1.000000 |
| rad37         | 4.68501e-09 | 1.000000 | 4.68501e-09 | 1.000000 |
| rad30         | 3.94539e-09 | 1.000000 | 3.94539e-09 | 1.000000 |
| PAH9+H        | 2.57108e-10 | 1.000000 | 2.57108e-10 | 1.000000 |
| rad38         | 1.08385e-10 | 1.000000 | 1.08385e-10 | 1.000000 |
| rad60syn      | 1.71588e-11 | 1.000000 | 1.71588e-11 | 1.000000 |
| rad60anti     | 8.37914e-12 | 1.000000 | 8.37914e-12 | 1.000000 |
| PAH3+H        | 6.84326e-12 | 1.000000 | 6.84326e-12 | 1.000000 |
| rad46         | 6.51963e-12 | 1.000000 | 6.51963e-12 | 1.000000 |
| PAH10+CH3     | 5.67120e-12 | 1.000000 | 5.67120e-12 | 1.000000 |
| rad59         | 1.41896e-12 | 1.000000 | 1.41896e-12 | 1.000000 |
| PhcycC3H3_A+H | 4.42422e-13 | 1.000000 | 4.42422e-13 | 1.000000 |
| rad43         | 2.64743e-13 | 1.000000 | 2.64743e-13 | 1.000000 |
| rad54         | 2.11003e-13 | 1.000000 | 2.11003e-13 | 1.000000 |
| rad62         | 5.67504e-14 | 1.000000 | 5.67504e-14 | 1.000000 |
| rad50         | 4.32261e-14 | 1.000000 | 4.32261e-14 | 1.000000 |
| rad70         | 3.24823e-15 | 1.000000 | 3.24823e-15 | 1.000000 |
| rad55         | 1.42504e-15 | 1.000000 | 1.42504e-15 | 1.000000 |



|                               |             |          |             |          |
|-------------------------------|-------------|----------|-------------|----------|
| PAH1+H                        | 5.84855e-16 | 1.000000 | 5.84855e-16 | 1.000000 |
| rad52                         | 2.74820e-16 | 1.000000 | 2.74820e-16 | 1.000000 |
| rad58                         | 7.77933e-17 | 1.000000 | 7.77933e-17 | 1.000000 |
| rad51                         | 6.70683e-17 | 1.000000 | 6.70683e-17 | 1.000000 |
| Phenyl+cycC3H4                | 5.25631e-17 | 1.000000 | 0.00000     | 1.000000 |
| rad34                         | 3.05744e-17 | 1.000000 | 3.05744e-17 | 1.000000 |
| rad42                         | 3.20852e-18 | 1.000000 | 3.20852e-18 | 1.000000 |
| rad41                         | 2.96189e-18 | 1.000000 | 2.96189e-18 | 1.000000 |
| rad65                         | 1.32250e-18 | 1.000000 | 1.32250e-18 | 1.000000 |
| PhcycC3H3_B+H                 | 4.34755e-29 | 1.000000 | 4.34755e-29 | 1.000000 |
| Benzene+cycloprop-2-enylidene | 1.33923e-30 | 1.000000 | 1.33923e-30 | 1.000000 |
| rad6                          | 4.37762e-31 | 1.000000 | 4.37762e-31 | 1.000000 |
| rad53                         | 8.44016e-32 | 1.000000 | 8.44016e-32 | 1.000000 |
| rad26                         | 5.41917e-32 | 1.000000 | 5.41917e-32 | 1.000000 |
| rad28                         | 2.78418e-32 | 1.000000 | 2.78418e-32 | 1.000000 |
| rad47                         | 2.66202e-32 | 1.000000 | 2.66202e-32 | 1.000000 |
| rad64                         | 3.66429e-34 | 1.000000 | 3.66429e-34 | 1.000000 |
| rad2                          | 2.42055e-34 | 1.000000 | 2.42055e-34 | 1.000000 |
| rad7                          | 3.15903e-35 | 1.000000 | 3.15903e-35 | 1.000000 |
| rad1                          | 1.52979e-35 | 1.000000 | 1.52979e-35 | 1.000000 |
| rad10                         | 1.25753e-35 | 1.000000 | 1.25753e-35 | 1.000000 |
| rad14                         | 1.11660e-35 | 1.000000 | 1.11660e-35 | 1.000000 |
| rad11                         | 7.74654e-36 | 1.000000 | 7.74654e-36 | 1.000000 |
| rad25                         | 5.16107e-36 | 1.000000 | 5.16107e-36 | 1.000000 |
| rad3                          | 1.83233e-36 | 1.000000 | 1.83233e-36 | 1.000000 |
| rad27                         | 1.05016e-36 | 1.000000 | 1.05016e-36 | 1.000000 |
| rad19anti                     | 9.43582e-37 | 1.000000 | 9.43582e-37 | 1.000000 |
| rad4                          | 9.25560e-37 | 1.000000 | 9.25560e-37 | 1.000000 |
| rad13                         | 1.74494e-37 | 1.000000 | 1.74494e-37 | 1.000000 |
| rad9                          | 4.13101e-38 | 1.000000 | 4.13101e-38 | 1.000000 |
| rad5                          | 6.04461e-39 | 1.000000 | 6.04461e-39 | 1.000000 |
| rad33                         | 3.68676e-40 | 1.000000 | 3.68676e-40 | 1.000000 |
| rad31                         | 5.64813e-41 | 1.000000 | 5.64813e-41 | 1.000000 |
| rad61                         | 3.99438e-41 | 1.000000 | 3.99438e-41 | 1.000000 |
| rad15                         | 1.79241e-41 | 1.000000 | 1.79241e-41 | 1.000000 |
| rad20                         | 2.85929e-43 | 1.000000 | 2.85929e-43 | 1.000000 |
| rad56                         | 2.62092e-43 | 1.000000 | 2.62092e-43 | 1.000000 |
| rad21                         | 2.26458e-43 | 1.000000 | 2.26458e-43 | 1.000000 |
| rad18                         | 3.59339e-45 | 1.000000 | 3.59339e-45 | 1.000000 |
| rad12                         | 2.19800e-45 | 1.000000 | 2.19800e-45 | 1.000000 |
| rad68syn                      | 1.99223e-45 | 1.000000 | 1.99223e-45 | 1.000000 |
| rad68anti                     | 1.70454e-45 | 1.000000 | 1.70454e-45 | 1.000000 |
| rad23                         | 9.82576e-47 | 1.000000 | 9.82576e-47 | 1.000000 |
| rad19syn                      | 8.38610e-47 | 1.000000 | 8.38610e-47 | 1.000000 |
| rad22                         | 2.00613e-47 | 1.000000 | 2.00613e-47 | 1.000000 |
| rad45                         | 6.38298e-49 | 1.000000 | 6.38298e-49 | 1.000000 |
| rad24                         | 3.79007e-49 | 1.000000 | 3.79007e-49 | 1.000000 |
| rad36                         | 3.91421e-50 | 1.000000 | 3.91421e-50 | 1.000000 |
| rad73                         | 1.66955e-53 | 1.000000 | 1.66955e-53 | 1.000000 |
| rad40syn                      | 2.57249e-54 | 1.000000 | 2.57249e-54 | 1.000000 |
| rad40anti                     | 2.11969e-54 | 1.000000 | 2.11969e-54 | 1.000000 |
| Benzene+cycloprop-1-enylidene | 9.28861e-56 | 1.000000 | 9.28861e-56 | 1.000000 |
| PAH8+H                        | 1.00608e-58 | 1.000000 | 1.00608e-58 | 1.000000 |
| rad71                         | 2.96432e-62 | 1.000000 | 2.96432e-62 | 1.000000 |
| rad8                          | 1.26714e-66 | 1.000000 | 1.26714e-66 | 1.000000 |

0.100000000E-06 Pa, 40.000000 K

=====

| Rate constant             | True (fraction)        | Effective (fraction)   |
|---------------------------|------------------------|------------------------|
| Total                     | 2.24819e-18 (1.00 )    | 2.24819e-18 (1.00 )    |
| Formation of rad19        | 2.24819e-18 (1.00 )    | 2.24819e-18 (1.00 )    |
| H-abstraction to cyc2enyl | 1.72361e-40 (7.67e-23) | 1.72361e-40 (7.67e-23) |
| H-abstraction to cyclenyl | 2.48792e-59 (1.11e-41) | 2.48792e-59 (1.11e-41) |

| species    | PYtrue      | Cumul    | PYeffective | Cumul    |
|------------|-------------|----------|-------------|----------|
| Indene+H   | 0.999767    | 0.999767 | 0.999767    | 0.999767 |
| PhCHCCH2+H | 0.000221748 | 0.999989 | 0.000221748 | 0.999989 |
| PhCCH+CH3  | 3.83605e-06 | 0.999993 | 3.83605e-06 | 0.999993 |
| C2H2+PhCH2 | 2.73340e-06 | 0.999995 | 2.73340e-06 | 0.999995 |
| PhCCCH3+H  | 2.16038e-06 | 0.999997 | 2.16038e-06 | 0.999997 |
| Ph+MeAc    | 1.60299e-06 | 0.999999 | 1.60299e-06 | 0.999999 |
| rad67      | 4.85698e-07 | 1.000000 | 4.85698e-07 | 1.000000 |
| rad35      | 2.14867e-07 | 1.000000 | 2.14867e-07 | 1.000000 |
| Ph+Allene  | 1.40139e-07 | 1.000000 | 1.40139e-07 | 1.000000 |
| PAH7+H     | 1.84621e-08 | 1.000000 | 1.84621e-08 | 1.000000 |
| PhCH2CCH+H | 1.71356e-08 | 1.000000 | 1.71356e-08 | 1.000000 |
| rad39      | 5.20698e-09 | 1.000000 | 5.20698e-09 | 1.000000 |
| rad37      | 4.79888e-09 | 1.000000 | 4.79888e-09 | 1.000000 |

|                               |             |          |             |          |
|-------------------------------|-------------|----------|-------------|----------|
| rad30                         | 4.01853e-09 | 1.000000 | 4.01853e-09 | 1.000000 |
| PAH9+H                        | 2.63258e-10 | 1.000000 | 2.63258e-10 | 1.000000 |
| rad38                         | 1.11216e-10 | 1.000000 | 1.11216e-10 | 1.000000 |
| rad60syn                      | 1.76027e-11 | 1.000000 | 1.76027e-11 | 1.000000 |
| rad60anti                     | 8.60137e-12 | 1.000000 | 8.60137e-12 | 1.000000 |
| PAH3+H                        | 7.08284e-12 | 1.000000 | 7.08284e-12 | 1.000000 |
| rad46                         | 6.70313e-12 | 1.000000 | 6.70313e-12 | 1.000000 |
| PAH10+CH3                     | 5.95405e-12 | 1.000000 | 5.95405e-12 | 1.000000 |
| rad59                         | 1.46672e-12 | 1.000000 | 1.46672e-12 | 1.000000 |
| PhcycC3H3_A+H                 | 5.01394e-13 | 1.000000 | 5.01394e-13 | 1.000000 |
| rad43                         | 2.76481e-13 | 1.000000 | 2.76481e-13 | 1.000000 |
| rad54                         | 2.21365e-13 | 1.000000 | 2.21365e-13 | 1.000000 |
| rad62                         | 5.93636e-14 | 1.000000 | 5.93636e-14 | 1.000000 |
| rad50                         | 4.49944e-14 | 1.000000 | 4.49944e-14 | 1.000000 |
| rad70                         | 3.45813e-15 | 1.000000 | 3.45813e-15 | 1.000000 |
| rad55                         | 1.51897e-15 | 1.000000 | 1.51897e-15 | 1.000000 |
| PAH1+H                        | 6.38443e-16 | 1.000000 | 6.38443e-16 | 1.000000 |
| rad52                         | 2.88755e-16 | 1.000000 | 2.88755e-16 | 1.000000 |
| Phenyl+cycC3H4                | 1.15738e-16 | 1.000000 | 0.000000    | 1.000000 |
| rad58                         | 8.33664e-17 | 1.000000 | 8.33664e-17 | 1.000000 |
| rad51                         | 7.12775e-17 | 1.000000 | 7.12775e-17 | 1.000000 |
| rad34                         | 3.35233e-17 | 1.000000 | 3.35233e-17 | 1.000000 |
| rad42                         | 3.55448e-18 | 1.000000 | 3.55448e-18 | 1.000000 |
| rad41                         | 3.38724e-18 | 1.000000 | 3.38724e-18 | 1.000000 |
| rad65                         | 1.41378e-18 | 1.000000 | 1.41378e-18 | 1.000000 |
| Benzene+cycloprop-2-enylidene | 7.66665e-23 | 1.000000 | 7.66665e-23 | 1.000000 |
| PhcycC3H3_B+H                 | 8.31294e-25 | 1.000000 | 8.31294e-25 | 1.000000 |
| rad53                         | 2.41915e-29 | 1.000000 | 2.41915e-29 | 1.000000 |
| rad6                          | 1.64170e-31 | 1.000000 | 1.64170e-31 | 1.000000 |
| rad26                         | 3.20332e-32 | 1.000000 | 3.20332e-32 | 1.000000 |
| rad47                         | 1.79767e-32 | 1.000000 | 1.79767e-32 | 1.000000 |
| rad28                         | 1.46371e-32 | 1.000000 | 1.46371e-32 | 1.000000 |
| rad64                         | 3.26765e-33 | 1.000000 | 3.26765e-33 | 1.000000 |
| rad2                          | 1.14570e-34 | 1.000000 | 1.14570e-34 | 1.000000 |
| rad7                          | 1.18546e-35 | 1.000000 | 1.18546e-35 | 1.000000 |
| rad14                         | 7.43475e-36 | 1.000000 | 7.43475e-36 | 1.000000 |
| rad1                          | 7.24896e-36 | 1.000000 | 7.24896e-36 | 1.000000 |
| rad10                         | 5.96088e-36 | 1.000000 | 5.96088e-36 | 1.000000 |
| rad25                         | 3.46322e-36 | 1.000000 | 3.46322e-36 | 1.000000 |
| rad11                         | 2.91196e-36 | 1.000000 | 2.91196e-36 | 1.000000 |
| rad3                          | 9.40887e-37 | 1.000000 | 9.40887e-37 | 1.000000 |
| rad19anti                     | 7.57595e-37 | 1.000000 | 7.57595e-37 | 1.000000 |
| rad27                         | 7.05718e-37 | 1.000000 | 7.05718e-37 | 1.000000 |
| rad4                          | 4.75377e-37 | 1.000000 | 4.75377e-37 | 1.000000 |
| rad13                         | 6.55042e-38 | 1.000000 | 6.55042e-38 | 1.000000 |
| rad9                          | 2.08277e-38 | 1.000000 | 2.08277e-38 | 1.000000 |
| rad5                          | 3.42961e-39 | 1.000000 | 3.42961e-39 | 1.000000 |
| rad33                         | 1.51387e-40 | 1.000000 | 1.51387e-40 | 1.000000 |
| rad61                         | 6.80053e-41 | 1.000000 | 6.80053e-41 | 1.000000 |
| rad31                         | 4.36431e-41 | 1.000000 | 4.36431e-41 | 1.000000 |
| Benzene+cycloprop-1-enylidene | 1.10663e-41 | 1.000000 | 1.10663e-41 | 1.000000 |
| rad15                         | 9.05249e-42 | 1.000000 | 9.05249e-42 | 1.000000 |
| rad56                         | 4.28738e-43 | 1.000000 | 4.28738e-43 | 1.000000 |
| rad20                         | 2.00344e-43 | 1.000000 | 2.00344e-43 | 1.000000 |
| rad21                         | 1.59064e-43 | 1.000000 | 1.59064e-43 | 1.000000 |
| rad68syn                      | 3.31657e-45 | 1.000000 | 3.31657e-45 | 1.000000 |
| rad68anti                     | 2.83607e-45 | 1.000000 | 2.83607e-45 | 1.000000 |
| rad18                         | 2.45778e-45 | 1.000000 | 2.45778e-45 | 1.000000 |
| rad12                         | 1.59459e-45 | 1.000000 | 1.59459e-45 | 1.000000 |
| rad19syn                      | 8.61360e-47 | 1.000000 | 8.61360e-47 | 1.000000 |
| rad23                         | 4.78843e-47 | 1.000000 | 4.78843e-47 | 1.000000 |
| rad22                         | 1.30690e-47 | 1.000000 | 1.30690e-47 | 1.000000 |
| rad45                         | 3.16870e-49 | 1.000000 | 3.16870e-49 | 1.000000 |
| rad24                         | 2.77744e-49 | 1.000000 | 2.77744e-49 | 1.000000 |
| rad36                         | 1.94247e-50 | 1.000000 | 1.94247e-50 | 1.000000 |
| rad73                         | 2.95410e-53 | 1.000000 | 2.95410e-53 | 1.000000 |
| rad40syn                      | 5.41704e-54 | 1.000000 | 5.41704e-54 | 1.000000 |
| rad40anti                     | 4.46179e-54 | 1.000000 | 4.46179e-54 | 1.000000 |
| PAH8+H                        | 2.23568e-58 | 1.000000 | 2.23568e-58 | 1.000000 |
| rad71                         | 5.87045e-62 | 1.000000 | 5.87045e-62 | 1.000000 |
| rad8                          | 9.75566e-67 | 1.000000 | 9.75566e-67 | 1.000000 |

0.100000000E-06 Pa, 50.000000 K

=====

| Rate constant             | True (fraction)        | Effective (fraction)   |
|---------------------------|------------------------|------------------------|
| Total                     | 1.72707e-17 (1.00 )    | 1.72707e-17 (1.00 )    |
| Formation of rad19        | 1.72707e-17 (1.00 )    | 1.72707e-17 (1.00 )    |
| H-abstraction to cyc2enyl | 5.49905e-35 (3.18e-18) | 5.49905e-35 (3.18e-18) |
| H-abstraction to cyclenyl | 4.93090e-50 (2.86e-33) | 4.93090e-50 (2.86e-33) |

| species                       | PYtrue      | Cumul    | PYeffective | Cumul    |
|-------------------------------|-------------|----------|-------------|----------|
| Indene+H                      | 0.999763    | 0.999763 | 0.999763    | 0.999763 |
| PhCHCCH2+H                    | 0.000225658 | 0.999989 | 0.000225658 | 0.999989 |
| PhCCH+CH3                     | 3.90994e-06 | 0.999993 | 3.90994e-06 | 0.999993 |
| C2H2+PhCH2                    | 2.79605e-06 | 0.999995 | 2.79605e-06 | 0.999995 |
| PhCCCH3+H                     | 2.20592e-06 | 0.999998 | 2.20592e-06 | 0.999998 |
| Ph+MeAc                       | 1.64418e-06 | 0.999999 | 1.64418e-06 | 0.999999 |
| rad67                         | 4.97514e-07 | 1.000000 | 4.97514e-07 | 1.000000 |
| rad35                         | 2.19879e-07 | 1.000000 | 2.19879e-07 | 1.000000 |
| Ph+Allene                     | 1.44942e-07 | 1.000000 | 1.44942e-07 | 1.000000 |
| PAH7+H                        | 1.90048e-08 | 1.000000 | 1.90048e-08 | 1.000000 |
| PhCH2CCH+H                    | 1.78174e-08 | 1.000000 | 1.78174e-08 | 1.000000 |
| rad39                         | 5.36057e-09 | 1.000000 | 5.36057e-09 | 1.000000 |
| rad37                         | 4.94868e-09 | 1.000000 | 4.94868e-09 | 1.000000 |
| rad30                         | 4.11419e-09 | 1.000000 | 4.11419e-09 | 1.000000 |
| PAH9+H                        | 2.71352e-10 | 1.000000 | 2.71352e-10 | 1.000000 |
| rad38                         | 1.14954e-10 | 1.000000 | 1.14954e-10 | 1.000000 |
| rad60syn                      | 1.81880e-11 | 1.000000 | 1.81880e-11 | 1.000000 |
| rad60anti                     | 8.89466e-12 | 1.000000 | 8.89466e-12 | 1.000000 |
| PAH3+H                        | 7.40206e-12 | 1.000000 | 7.40206e-12 | 1.000000 |
| rad46                         | 6.94584e-12 | 1.000000 | 6.94584e-12 | 1.000000 |
| PAH10+CH3                     | 6.33665e-12 | 1.000000 | 6.33665e-12 | 1.000000 |
| rad59                         | 1.53025e-12 | 1.000000 | 1.53025e-12 | 1.000000 |
| PhcycC3H3_A+H                 | 5.85937e-13 | 1.000000 | 5.85937e-13 | 1.000000 |
| rad43                         | 2.92252e-13 | 1.000000 | 2.92252e-13 | 1.000000 |
| rad54                         | 2.35374e-13 | 1.000000 | 2.35374e-13 | 1.000000 |
| rad62                         | 6.28791e-14 | 1.000000 | 6.28791e-14 | 1.000000 |
| rad50                         | 4.73675e-14 | 1.000000 | 4.73675e-14 | 1.000000 |
| rad70                         | 3.74676e-15 | 1.000000 | 3.74676e-15 | 1.000000 |
| rad55                         | 1.64775e-15 | 1.000000 | 1.64775e-15 | 1.000000 |
| PAH1+H                        | 7.14028e-16 | 1.000000 | 7.14028e-16 | 1.000000 |
| rad52                         | 3.07655e-16 | 1.000000 | 3.07655e-16 | 1.000000 |
| Phenyl+cycC3H4                | 2.36668e-16 | 1.000000 | 0.000000    | 1.000000 |
| rad58                         | 9.10706e-17 | 1.000000 | 9.10706e-17 | 1.000000 |
| rad51                         | 7.70607e-17 | 1.000000 | 7.70607e-17 | 1.000000 |
| rad34                         | 3.76207e-17 | 1.000000 | 3.76207e-17 | 1.000000 |
| rad42                         | 4.07396e-18 | 1.000000 | 4.07396e-18 | 1.000000 |
| rad41                         | 4.02391e-18 | 1.000000 | 4.02391e-18 | 1.000000 |
| Benzene+cycloprop-2-enylidene | 3.18404e-18 | 1.000000 | 3.18404e-18 | 1.000000 |
| rad65                         | 1.53995e-18 | 1.000000 | 1.53995e-18 | 1.000000 |
| PhcycC3H3_B+H                 | 2.98283e-22 | 1.000000 | 2.98283e-22 | 1.000000 |
| rad53                         | 8.13862e-27 | 1.000000 | 8.13862e-27 | 1.000000 |
| rad64                         | 5.78679e-30 | 1.000000 | 5.78679e-30 | 1.000000 |
| rad6                          | 8.37640e-32 | 1.000000 | 8.37640e-32 | 1.000000 |
| rad26                         | 2.22438e-32 | 1.000000 | 2.22438e-32 | 1.000000 |
| rad47                         | 1.37437e-32 | 1.000000 | 1.37437e-32 | 1.000000 |
| rad28                         | 9.39784e-33 | 1.000000 | 9.39784e-33 | 1.000000 |
| Benzene+cycloprop-1-enylidene | 2.85507e-33 | 1.000000 | 2.85507e-33 | 1.000000 |
| rad2                          | 7.36734e-35 | 1.000000 | 7.36734e-35 | 1.000000 |
| rad7                          | 6.05404e-36 | 1.000000 | 6.05404e-36 | 1.000000 |
| rad14                         | 5.60832e-36 | 1.000000 | 5.60832e-36 | 1.000000 |
| rad1                          | 4.66895e-36 | 1.000000 | 4.66895e-36 | 1.000000 |
| rad10                         | 3.86672e-36 | 1.000000 | 3.86672e-36 | 1.000000 |
| rad25                         | 2.63988e-36 | 1.000000 | 2.63988e-36 | 1.000000 |
| rad11                         | 1.49006e-36 | 1.000000 | 1.49006e-36 | 1.000000 |
| rad19anti                     | 7.56647e-37 | 1.000000 | 7.56647e-37 | 1.000000 |
| rad3                          | 6.60610e-37 | 1.000000 | 6.60610e-37 | 1.000000 |
| rad27                         | 5.39359e-37 | 1.000000 | 5.39359e-37 | 1.000000 |
| rad4                          | 3.33882e-37 | 1.000000 | 3.33882e-37 | 1.000000 |
| rad13                         | 3.34696e-38 | 1.000000 | 3.34696e-38 | 1.000000 |
| rad9                          | 1.40776e-38 | 1.000000 | 1.40776e-38 | 1.000000 |
| rad5                          | 2.32628e-39 | 1.000000 | 2.32628e-39 | 1.000000 |
| rad61                         | 1.95110e-40 | 1.000000 | 1.95110e-40 | 1.000000 |
| rad33                         | 8.54797e-41 | 1.000000 | 8.54797e-41 | 1.000000 |
| rad31                         | 4.10769e-41 | 1.000000 | 4.10769e-41 | 1.000000 |
| rad15                         | 6.12770e-42 | 1.000000 | 6.12770e-42 | 1.000000 |
| rad56                         | 1.18498e-42 | 1.000000 | 1.18498e-42 | 1.000000 |
| rad20                         | 1.62665e-43 | 1.000000 | 1.62665e-43 | 1.000000 |
| rad21                         | 1.29590e-43 | 1.000000 | 1.29590e-43 | 1.000000 |
| rad68syn                      | 9.39644e-45 | 1.000000 | 9.39644e-45 | 1.000000 |
| rad68anti                     | 8.02870e-45 | 1.000000 | 8.02870e-45 | 1.000000 |
| rad18                         | 1.92619e-45 | 1.000000 | 1.92619e-45 | 1.000000 |
| rad12                         | 1.39780e-45 | 1.000000 | 1.39780e-45 | 1.000000 |
| rad19syn                      | 1.15714e-46 | 1.000000 | 1.15714e-46 | 1.000000 |
| rad23                         | 3.12752e-47 | 1.000000 | 3.12752e-47 | 1.000000 |
| rad22                         | 9.86333e-48 | 1.000000 | 9.86333e-48 | 1.000000 |
| rad24                         | 2.40043e-49 | 1.000000 | 2.40043e-49 | 1.000000 |
| rad45                         | 2.14041e-49 | 1.000000 | 2.14041e-49 | 1.000000 |

|           |             |         |             |         |
|-----------|-------------|---------|-------------|---------|
| rad36     | 1.31156e-50 | 1.00000 | 1.31156e-50 | 1.00000 |
| rad73     | 9.15257e-53 | 1.00000 | 9.15257e-53 | 1.00000 |
| rad40syn  | 2.11570e-53 | 1.00000 | 2.11570e-53 | 1.00000 |
| rad40anti | 1.74111e-53 | 1.00000 | 1.74111e-53 | 1.00000 |
| PAH8+H    | 9.50860e-58 | 1.00000 | 9.50860e-58 | 1.00000 |
| rad71     | 2.15900e-61 | 1.00000 | 2.15900e-61 | 1.00000 |
| rad8      | 9.04687e-67 | 1.00000 | 9.04687e-67 | 1.00000 |

0.100000000E-06 Pa, 60.0000000 K

| Rate constant             | True (fraction)        | Effective (fraction)   |
|---------------------------|------------------------|------------------------|
| Total                     | 6.93738e-17 (1.00 )    | 6.93738e-17 (1.00 )    |
| Formation of rad19        | 6.93738e-17 (1.000 )   | 6.93738e-17 (1.000 )   |
| H-abstraction to cyc2enyl | 2.50609e-31 (3.61e-15) | 2.50609e-31 (3.61e-15) |
| H-abstraction to cyclenyl | 7.62015e-44 (1.10e-27) | 7.62015e-44 (1.10e-27) |

| species                       | PYtrue      | Cumul    | PYeffective | Cumul    |
|-------------------------------|-------------|----------|-------------|----------|
| Indene+H                      | 0.999758    | 0.999758 | 0.999758    | 0.999758 |
| PhCHCCH2+H                    | 0.000230121 | 0.999988 | 0.000230121 | 0.999988 |
| PhCCH+CH3                     | 3.99427e-06 | 0.999992 | 3.99427e-06 | 0.999992 |
| C2H2+PhCH2                    | 2.86797e-06 | 0.999995 | 2.86797e-06 | 0.999995 |
| PhCCCH3+H                     | 2.25806e-06 | 0.999997 | 2.25806e-06 | 0.999997 |
| Ph+MeAc                       | 1.69157e-06 | 0.999999 | 1.69157e-06 | 0.999999 |
| rad67                         | 5.11098e-07 | 0.999999 | 5.11098e-07 | 0.999999 |
| rad35                         | 2.25634e-07 | 1.000000 | 2.25634e-07 | 1.000000 |
| Ph+Allene                     | 1.50530e-07 | 1.000000 | 1.50530e-07 | 1.000000 |
| PAH7+H                        | 1.96327e-08 | 1.000000 | 1.96327e-08 | 1.000000 |
| PhCH2CCH+H                    | 1.86153e-08 | 1.000000 | 1.86153e-08 | 1.000000 |
| rad39                         | 5.53820e-09 | 1.000000 | 5.53820e-09 | 1.000000 |
| rad37                         | 5.12226e-09 | 1.000000 | 5.12226e-09 | 1.000000 |
| rad30                         | 4.22418e-09 | 1.000000 | 4.22418e-09 | 1.000000 |
| PAH9+H                        | 2.80739e-10 | 1.000000 | 2.80739e-10 | 1.000000 |
| rad38                         | 1.19306e-10 | 1.000000 | 1.19306e-10 | 1.000000 |
| rad60syn                      | 1.88685e-11 | 1.000000 | 1.88685e-11 | 1.000000 |
| rad60anti                     | 9.23591e-12 | 1.000000 | 9.23591e-12 | 1.000000 |
| PAH3+H                        | 7.77808e-12 | 1.000000 | 7.77808e-12 | 1.000000 |
| rad46                         | 7.22908e-12 | 1.000000 | 7.22908e-12 | 1.000000 |
| PAH10+CH3                     | 6.79612e-12 | 1.000000 | 6.79612e-12 | 1.000000 |
| rad59                         | 1.60493e-12 | 1.000000 | 1.60493e-12 | 1.000000 |
| PhcycC3H3_A+H                 | 6.95715e-13 | 1.000000 | 6.95715e-13 | 1.000000 |
| rad43                         | 3.11028e-13 | 1.000000 | 3.11028e-13 | 1.000000 |
| rad54                         | 2.52187e-13 | 1.000000 | 2.52187e-13 | 1.000000 |
| rad62                         | 6.70704e-14 | 1.000000 | 6.70704e-14 | 1.000000 |
| rad50                         | 5.01888e-14 | 1.000000 | 5.01888e-14 | 1.000000 |
| rad70                         | 4.10054e-15 | 1.000000 | 4.10054e-15 | 1.000000 |
| Benzene+cycloprop-2-enylidene | 3.61245e-15 | 1.000000 | 3.61245e-15 | 1.000000 |
| rad55                         | 1.80524e-15 | 1.000000 | 1.80524e-15 | 1.000000 |
| PAH1+H                        | 8.09571e-16 | 1.000000 | 8.09571e-16 | 1.000000 |
| Phenyl+cycC3H4                | 4.45921e-16 | 1.000000 | 0.000000    | 1.000000 |
| rad52                         | 3.30434e-16 | 1.000000 | 3.30434e-16 | 1.000000 |
| rad58                         | 1.00588e-16 | 1.000000 | 1.00588e-16 | 1.000000 |
| rad51                         | 8.41470e-17 | 1.000000 | 8.41470e-17 | 1.000000 |
| rad34                         | 4.27629e-17 | 1.000000 | 4.27629e-17 | 1.000000 |
| rad41                         | 4.87030e-18 | 1.000000 | 4.87030e-18 | 1.000000 |
| rad42                         | 4.76393e-18 | 1.000000 | 4.76393e-18 | 1.000000 |
| rad65                         | 1.69577e-18 | 1.000000 | 1.69577e-18 | 1.000000 |
| PhcycC3H3_B+H                 | 1.47017e-20 | 1.000000 | 1.47017e-20 | 1.000000 |
| rad53                         | 3.73122e-25 | 1.000000 | 3.73122e-25 | 1.000000 |
| Benzene+cycloprop-1-enylidene | 1.09842e-27 | 1.000000 | 1.09842e-27 | 1.000000 |
| rad64                         | 9.21633e-28 | 1.000000 | 9.21633e-28 | 1.000000 |
| rad6                          | 5.04210e-32 | 1.000000 | 5.04210e-32 | 1.000000 |
| rad26                         | 1.68370e-32 | 1.000000 | 1.68370e-32 | 1.000000 |
| rad47                         | 1.12620e-32 | 1.000000 | 1.12620e-32 | 1.000000 |
| rad28                         | 6.71095e-33 | 1.000000 | 6.71095e-33 | 1.000000 |
| rad2                          | 5.87598e-35 | 1.000000 | 5.87598e-35 | 1.000000 |
| rad61                         | 4.84982e-35 | 1.000000 | 4.84982e-35 | 1.000000 |
| rad14                         | 4.54907e-36 | 1.000000 | 4.54907e-36 | 1.000000 |
| rad1                          | 3.73131e-36 | 1.000000 | 3.73131e-36 | 1.000000 |
| rad7                          | 3.64823e-36 | 1.000000 | 3.64823e-36 | 1.000000 |
| rad10                         | 3.03542e-36 | 1.000000 | 3.03542e-36 | 1.000000 |
| rad25                         | 2.16735e-36 | 1.000000 | 2.16735e-36 | 1.000000 |
| rad11                         | 8.99941e-37 | 1.000000 | 8.99941e-37 | 1.000000 |
| rad19anti                     | 8.79993e-37 | 1.000000 | 8.79993e-37 | 1.000000 |
| rad3                          | 5.55217e-37 | 1.000000 | 5.55217e-37 | 1.000000 |
| rad27                         | 4.44469e-37 | 1.000000 | 4.44469e-37 | 1.000000 |
| rad4                          | 2.80738e-37 | 1.000000 | 2.80738e-37 | 1.000000 |
| rad13                         | 2.01818e-38 | 1.000000 | 2.01818e-38 | 1.000000 |
| rad9                          | 1.12414e-38 | 1.000000 | 1.12414e-38 | 1.000000 |

|           |             |          |             |          |
|-----------|-------------|----------|-------------|----------|
| rad5      | 1.73914e-39 | 1.000000 | 1.73914e-39 | 1.000000 |
| rad33     | 5.75330e-41 | 1.000000 | 5.75330e-41 | 1.000000 |
| rad31     | 4.41920e-41 | 1.000000 | 4.41920e-41 | 1.000000 |
| rad56     | 6.11504e-42 | 1.000000 | 6.11504e-42 | 1.000000 |
| rad15     | 4.89932e-42 | 1.000000 | 4.89932e-42 | 1.000000 |
| rad20     | 1.44330e-43 | 1.000000 | 1.44330e-43 | 1.000000 |
| rad21     | 1.15461e-43 | 1.000000 | 1.15461e-43 | 1.000000 |
| rad68syn  | 4.98098e-44 | 1.000000 | 4.98098e-44 | 1.000000 |
| rad68anti | 4.25204e-44 | 1.000000 | 4.25204e-44 | 1.000000 |
| rad18     | 1.63611e-45 | 1.000000 | 1.63611e-45 | 1.000000 |
| rad12     | 1.37642e-45 | 1.000000 | 1.37642e-45 | 1.000000 |
| rad19syn  | 1.80508e-46 | 1.000000 | 1.80508e-46 | 1.000000 |
| rad23     | 2.44662e-47 | 1.000000 | 2.44662e-47 | 1.000000 |
| rad22     | 8.08211e-48 | 1.000000 | 8.08211e-48 | 1.000000 |
| rad24     | 2.29778e-49 | 1.000000 | 2.29778e-49 | 1.000000 |
| rad45     | 1.71805e-49 | 1.000000 | 1.71805e-49 | 1.000000 |
| rad36     | 1.05234e-50 | 1.000000 | 1.05234e-50 | 1.000000 |
| rad73     | 5.37831e-52 | 1.000000 | 5.37831e-52 | 1.000000 |
| rad40syn  | 1.54572e-52 | 1.000000 | 1.54572e-52 | 1.000000 |
| rad40anti | 1.27006e-52 | 1.000000 | 1.27006e-52 | 1.000000 |
| PAH8+H    | 7.80378e-57 | 1.000000 | 7.80378e-57 | 1.000000 |
| rad71     | 1.56443e-60 | 1.000000 | 1.56443e-60 | 1.000000 |
| rad8      | 9.43551e-67 | 1.000000 | 9.43551e-67 | 1.000000 |

0.100000000E-06 Pa, 70.0000000 K

| Rate constant             | True (fraction)        | Effective (fraction)   |
|---------------------------|------------------------|------------------------|
| Total                     | 1.91520e-16 (1.00 )    | 1.91520e-16 (1.00 )    |
| Formation of rad19        | 1.91520e-16 (1.000 )   | 1.91520e-16 (1.000 )   |
| H-abstraction to cyc2enyl | 1.01125e-28 (5.28e-13) | 1.01125e-28 (5.28e-13) |
| H-abstraction to cyclenyl | 1.97822e-39 (1.03e-23) | 1.97822e-39 (1.03e-23) |

| species                       | PYtrue      | Cumul    | PYeffective | Cumul    |
|-------------------------------|-------------|----------|-------------|----------|
| Indene+H                      | 0.999753    | 0.999753 | 0.999753    | 0.999753 |
| PhCHCCH2+H                    | 0.000235006 | 0.999988 | 0.000235006 | 0.999988 |
| PhCCH+CH3                     | 4.08659e-06 | 0.999992 | 4.08659e-06 | 0.999992 |
| C2H2+PhCH2                    | 2.94722e-06 | 0.999995 | 2.94722e-06 | 0.999995 |
| PhCCCH3+H                     | 2.31532e-06 | 0.999997 | 2.31532e-06 | 0.999997 |
| Ph+MeAc                       | 1.74394e-06 | 0.999999 | 1.74394e-06 | 0.999999 |
| rad67                         | 5.26090e-07 | 1.000000 | 5.26090e-07 | 1.000000 |
| rad35                         | 2.31978e-07 | 1.000000 | 2.31978e-07 | 1.000000 |
| Ph+Allene                     | 1.56781e-07 | 1.000000 | 1.56781e-07 | 1.000000 |
| PAH7+H                        | 2.03305e-08 | 1.000000 | 2.03305e-08 | 1.000000 |
| PhCH2CCH+H                    | 1.95142e-08 | 1.000000 | 1.95142e-08 | 1.000000 |
| rad39                         | 5.73559e-09 | 1.000000 | 5.73559e-09 | 1.000000 |
| rad37                         | 5.31557e-09 | 1.000000 | 5.31557e-09 | 1.000000 |
| rad30                         | 4.34562e-09 | 1.000000 | 4.34562e-09 | 1.000000 |
| PAH9+H                        | 2.91202e-10 | 1.000000 | 2.91202e-10 | 1.000000 |
| rad38                         | 1.24178e-10 | 1.000000 | 1.24178e-10 | 1.000000 |
| rad60syn                      | 1.96290e-11 | 1.000000 | 1.96290e-11 | 1.000000 |
| rad60anti                     | 9.61777e-12 | 1.000000 | 9.61777e-12 | 1.000000 |
| PAH3+H                        | 8.20481e-12 | 1.000000 | 8.20481e-12 | 1.000000 |
| rad46                         | 7.54709e-12 | 1.000000 | 7.54709e-12 | 1.000000 |
| PAH10+CH3                     | 7.32916e-12 | 1.000000 | 7.32916e-12 | 1.000000 |
| rad59                         | 1.68948e-12 | 1.000000 | 1.68948e-12 | 1.000000 |
| PhcycC3H3_A+H                 | 8.34926e-13 | 1.000000 | 8.34926e-13 | 1.000000 |
| Benzene+cycloprop-2-enylidene | 5.28015e-13 | 1.000000 | 5.28015e-13 | 1.000000 |
| rad43                         | 3.32593e-13 | 1.000000 | 3.32593e-13 | 1.000000 |
| rad54                         | 2.71678e-13 | 1.000000 | 2.71678e-13 | 1.000000 |
| rad62                         | 7.18916e-14 | 1.000000 | 7.18916e-14 | 1.000000 |
| rad50                         | 5.34248e-14 | 1.000000 | 5.34248e-14 | 1.000000 |
| rad70                         | 4.52036e-15 | 1.000000 | 4.52036e-15 | 1.000000 |
| rad55                         | 1.99187e-15 | 1.000000 | 1.99187e-15 | 1.000000 |
| PAH1+H                        | 9.26902e-16 | 1.000000 | 9.26902e-16 | 1.000000 |
| Phenyl+cycC3H4                | 7.87809e-16 | 1.000000 | 0.000000    | 1.000000 |
| rad52                         | 3.56973e-16 | 1.000000 | 3.56973e-16 | 1.000000 |
| rad58                         | 1.11992e-16 | 1.000000 | 1.11992e-16 | 1.000000 |
| rad51                         | 9.25595e-17 | 1.000000 | 9.25595e-17 | 1.000000 |
| rad34                         | 4.90706e-17 | 1.000000 | 4.90706e-17 | 1.000000 |
| rad41                         | 5.95426e-18 | 1.000000 | 5.95426e-18 | 1.000000 |
| rad42                         | 5.64287e-18 | 1.000000 | 5.64287e-18 | 1.000000 |
| rad65                         | 1.88240e-18 | 1.000000 | 1.88240e-18 | 1.000000 |
| PhcycC3H3_B+H                 | 2.38334e-19 | 1.000000 | 2.38334e-19 | 1.000000 |
| Benzene+cycloprop-1-enylidene | 1.03290e-23 | 1.000000 | 1.03290e-23 | 1.000000 |
| rad53                         | 5.56944e-24 | 1.000000 | 5.56944e-24 | 1.000000 |
| rad64                         | 3.39556e-26 | 1.000000 | 3.39556e-26 | 1.000000 |
| rad61                         | 5.68423e-32 | 1.000000 | 5.68423e-32 | 1.000000 |
| rad6                          | 3.36678e-32 | 1.000000 | 3.36678e-32 | 1.000000 |

|           |             |         |             |         |
|-----------|-------------|---------|-------------|---------|
| rad26     | 1.34539e-32 | 1.00000 | 1.34539e-32 | 1.00000 |
| rad47     | 9.65474e-33 | 1.00000 | 9.65474e-33 | 1.00000 |
| rad28     | 5.12044e-33 | 1.00000 | 5.12044e-33 | 1.00000 |
| rad2      | 5.10202e-35 | 1.00000 | 5.10202e-35 | 1.00000 |
| rad56     | 2.32702e-35 | 1.00000 | 2.32702e-35 | 1.00000 |
| rad14     | 3.87235e-36 | 1.00000 | 3.87235e-36 | 1.00000 |
| rad1      | 3.24742e-36 | 1.00000 | 3.24742e-36 | 1.00000 |
| rad10     | 2.67893e-36 | 1.00000 | 2.67893e-36 | 1.00000 |
| rad7      | 2.43911e-36 | 1.00000 | 2.43911e-36 | 1.00000 |
| rad25     | 1.86939e-36 | 1.00000 | 1.86939e-36 | 1.00000 |
| rad19anti | 1.14994e-36 | 1.00000 | 1.14994e-36 | 1.00000 |
| rad11     | 6.03186e-37 | 1.00000 | 6.03186e-37 | 1.00000 |
| rad3      | 5.30525e-37 | 1.00000 | 5.30525e-37 | 1.00000 |
| rad27     | 3.85166e-37 | 1.00000 | 3.85166e-37 | 1.00000 |
| rad4      | 2.68393e-37 | 1.00000 | 2.68393e-37 | 1.00000 |
| rad13     | 1.35028e-38 | 1.00000 | 1.35028e-38 | 1.00000 |
| rad9      | 1.00122e-38 | 1.00000 | 1.00122e-38 | 1.00000 |
| rad5      | 1.38264e-39 | 1.00000 | 1.38264e-39 | 1.00000 |
| rad31     | 5.25668e-41 | 1.00000 | 5.25668e-41 | 1.00000 |
| rad33     | 4.33945e-41 | 1.00000 | 4.33945e-41 | 1.00000 |
| rad15     | 4.36837e-42 | 1.00000 | 4.36837e-42 | 1.00000 |
| rad68syn  | 8.35689e-43 | 1.00000 | 8.35689e-43 | 1.00000 |
| rad68anti | 7.12848e-43 | 1.00000 | 7.12848e-43 | 1.00000 |
| rad20     | 1.36018e-43 | 1.00000 | 1.36018e-43 | 1.00000 |
| rad21     | 1.09330e-43 | 1.00000 | 1.09330e-43 | 1.00000 |
| rad12     | 1.46945e-45 | 1.00000 | 1.46945e-45 | 1.00000 |
| rad18     | 1.46660e-45 | 1.00000 | 1.46660e-45 | 1.00000 |
| rad19syn  | 3.07655e-46 | 1.00000 | 3.07655e-46 | 1.00000 |
| rad23     | 2.19695e-47 | 1.00000 | 2.19695e-47 | 1.00000 |
| rad22     | 6.98471e-48 | 1.00000 | 6.98471e-48 | 1.00000 |
| rad24     | 2.36076e-49 | 1.00000 | 2.36076e-49 | 1.00000 |
| rad45     | 1.63542e-49 | 1.00000 | 1.63542e-49 | 1.00000 |
| rad36     | 1.00141e-50 | 1.00000 | 1.00141e-50 | 1.00000 |
| rad73     | 9.69702e-51 | 1.00000 | 9.69702e-51 | 1.00000 |
| rad40syn  | 2.86238e-51 | 1.00000 | 2.86238e-51 | 1.00000 |
| rad40anti | 2.34562e-51 | 1.00000 | 2.34562e-51 | 1.00000 |
| PAH8+H    | 1.67105e-55 | 1.00000 | 1.67105e-55 | 1.00000 |
| rad71     | 3.35676e-59 | 1.00000 | 3.35676e-59 | 1.00000 |
| rad8      | 1.06794e-66 | 1.00000 | 1.06794e-66 | 1.00000 |

0.100000000E-06 Pa, 80.0000000 K

| Rate constant             | True (fraction)        | Effective (fraction)   |
|---------------------------|------------------------|------------------------|
| Total                     | 4.17084e-16 (1.00 )    | 4.17084e-16 (1.00 )    |
| Formation of rad19        | 4.17084e-16 (1.000 )   | 4.17084e-16 (1.000 )   |
| H-abstraction to cyc2enyl | 8.98751e-27 (2.15e-11) | 8.98751e-27 (2.15e-11) |
| H-abstraction to cyclenyl | 4.00120e-36 (9.59e-21) | 4.00120e-36 (9.59e-21) |

| species                       | PYtrue      | Cumul    | PYeffective | Cumul    |
|-------------------------------|-------------|----------|-------------|----------|
| Indene+H                      | 0.999747    | 0.999747 | 0.999747    | 0.999747 |
| PhCHCCH2+H                    | 0.000240278 | 0.999987 | 0.000240278 | 0.999987 |
| PhCCH+CH3                     | 4.18618e-06 | 0.999991 | 4.18618e-06 | 0.999991 |
| C2H2+PhCH2                    | 3.03335e-06 | 0.999994 | 3.03335e-06 | 0.999994 |
| PhCCCH3+H                     | 2.37733e-06 | 0.999997 | 2.37733e-06 | 0.999997 |
| Ph+MeAc                       | 1.80101e-06 | 0.999999 | 1.80101e-06 | 0.999999 |
| rad67                         | 5.42408e-07 | 0.999999 | 5.42408e-07 | 0.999999 |
| rad35                         | 2.38874e-07 | 0.999999 | 2.38874e-07 | 0.999999 |
| Ph+Allene                     | 1.63686e-07 | 1.000000 | 1.63686e-07 | 1.000000 |
| PAH7+H                        | 2.10959e-08 | 1.000000 | 2.10959e-08 | 1.000000 |
| PhCH2CCH+H                    | 2.05146e-08 | 1.000000 | 2.05146e-08 | 1.000000 |
| rad39                         | 5.95207e-09 | 1.000000 | 5.95207e-09 | 1.000000 |
| rad37                         | 5.52806e-09 | 1.000000 | 5.52806e-09 | 1.000000 |
| rad30                         | 4.47786e-09 | 1.000000 | 4.47786e-09 | 1.000000 |
| PAH9+H                        | 3.02716e-10 | 1.000000 | 3.02716e-10 | 1.000000 |
| rad38                         | 1.29567e-10 | 1.000000 | 1.29567e-10 | 1.000000 |
| Benzene+cycloprop-2-enylidene | 2.15484e-11 | 1.000000 | 2.15484e-11 | 1.000000 |
| rad60syn                      | 2.04685e-11 | 1.000000 | 2.04685e-11 | 1.000000 |
| rad60anti                     | 1.00397e-11 | 1.000000 | 1.00397e-11 | 1.000000 |
| PAH3+H                        | 8.68358e-12 | 1.000000 | 8.68358e-12 | 1.000000 |
| PAH10+CH3                     | 7.94154e-12 | 1.000000 | 7.94154e-12 | 1.000000 |
| rad46                         | 7.89977e-12 | 1.000000 | 7.89977e-12 | 1.000000 |
| rad59                         | 1.78410e-12 | 1.000000 | 1.78410e-12 | 1.000000 |
| PhcycC3H3_A+H                 | 1.01061e-12 | 1.000000 | 1.01061e-12 | 1.000000 |
| rad43                         | 3.57097e-13 | 1.000000 | 3.57097e-13 | 1.000000 |
| rad54                         | 2.94055e-13 | 1.000000 | 2.94055e-13 | 1.000000 |
| rad62                         | 7.73784e-14 | 1.000000 | 7.73784e-14 | 1.000000 |
| rad50                         | 5.70980e-14 | 1.000000 | 5.70980e-14 | 1.000000 |
| rad70                         | 5.01449e-15 | 1.000000 | 5.01449e-15 | 1.000000 |

|                               |             |          |             |          |
|-------------------------------|-------------|----------|-------------|----------|
| rad55                         | 2.21137e-15 | 1.000000 | 2.21137e-15 | 1.000000 |
| Phenyl+cycC3H4                | 1.32430e-15 | 1.000000 | 0.000000    | 1.000000 |
| PAH1+H                        | 1.07021e-15 | 1.000000 | 1.07021e-15 | 1.000000 |
| rad52                         | 3.87617e-16 | 1.000000 | 3.87617e-16 | 1.000000 |
| rad58                         | 1.25561e-16 | 1.000000 | 1.25561e-16 | 1.000000 |
| rad51                         | 1.02472e-16 | 1.000000 | 1.02472e-16 | 1.000000 |
| rad34                         | 5.67860e-17 | 1.000000 | 5.67860e-17 | 1.000000 |
| rad41                         | 7.33020e-18 | 1.000000 | 7.33020e-18 | 1.000000 |
| rad42                         | 6.74822e-18 | 1.000000 | 6.74822e-18 | 1.000000 |
| rad65                         | 2.10442e-18 | 1.000000 | 2.10442e-18 | 1.000000 |
| PhcycC3H3_B+H                 | 1.96138e-18 | 1.000000 | 1.96138e-18 | 1.000000 |
| Benzene+cycloprop-1-enylidene | 9.59328e-21 | 1.000000 | 9.59328e-21 | 1.000000 |
| rad53                         | 4.18956e-23 | 1.000000 | 4.18956e-23 | 1.000000 |
| rad64                         | 5.09107e-25 | 1.000000 | 5.09107e-25 | 1.000000 |
| rad61                         | 8.41954e-30 | 1.000000 | 8.41954e-30 | 1.000000 |
| rad6                          | 2.41419e-32 | 1.000000 | 2.41419e-32 | 1.000000 |
| rad56                         | 1.31867e-32 | 1.000000 | 1.31867e-32 | 1.000000 |
| rad26                         | 1.11560e-32 | 1.000000 | 1.11560e-32 | 1.000000 |
| rad47                         | 8.54859e-33 | 1.000000 | 8.54859e-33 | 1.000000 |
| rad28                         | 4.08646e-33 | 1.000000 | 4.08646e-33 | 1.000000 |
| rad68syn                      | 1.87136e-34 | 1.000000 | 1.87136e-34 | 1.000000 |
| rad68anti                     | 1.57600e-34 | 1.000000 | 1.57600e-34 | 1.000000 |
| rad2                          | 5.15702e-35 | 1.000000 | 5.15702e-35 | 1.000000 |
| rad14                         | 3.41188e-36 | 1.000000 | 3.41188e-36 | 1.000000 |
| rad1                          | 3.29110e-36 | 1.000000 | 3.29110e-36 | 1.000000 |
| rad10                         | 2.64073e-36 | 1.000000 | 2.64073e-36 | 1.000000 |
| rad7                          | 1.75141e-36 | 1.000000 | 1.75141e-36 | 1.000000 |
| rad25                         | 1.67022e-36 | 1.000000 | 1.67022e-36 | 1.000000 |
| rad19anti                     | 1.65192e-36 | 1.000000 | 1.65192e-36 | 1.000000 |
| rad3                          | 5.57338e-37 | 1.000000 | 5.57338e-37 | 1.000000 |
| rad11                         | 4.34323e-37 | 1.000000 | 4.34323e-37 | 1.000000 |
| rad27                         | 3.46030e-37 | 1.000000 | 3.46030e-37 | 1.000000 |
| rad4                          | 2.82129e-37 | 1.000000 | 2.82129e-37 | 1.000000 |
| rad13                         | 9.70347e-39 | 1.000000 | 9.70347e-39 | 1.000000 |
| rad9                          | 9.63882e-39 | 1.000000 | 9.63882e-39 | 1.000000 |
| rad5                          | 1.14652e-39 | 1.000000 | 1.14652e-39 | 1.000000 |
| rad31                         | 6.77597e-41 | 1.000000 | 6.77597e-41 | 1.000000 |
| rad33                         | 3.54952e-41 | 1.000000 | 3.54952e-41 | 1.000000 |
| rad15                         | 4.20956e-42 | 1.000000 | 4.20956e-42 | 1.000000 |
| rad20                         | 1.33943e-43 | 1.000000 | 1.33943e-43 | 1.000000 |
| rad21                         | 1.08229e-43 | 1.000000 | 1.08229e-43 | 1.000000 |
| rad12                         | 1.66657e-45 | 1.000000 | 1.66657e-45 | 1.000000 |
| rad18                         | 1.36629e-45 | 1.000000 | 1.36629e-45 | 1.000000 |
| rad19syn                      | 5.56519e-46 | 1.000000 | 5.56519e-46 | 1.000000 |
| rad23                         | 2.22631e-47 | 1.000000 | 2.22631e-47 | 1.000000 |
| rad22                         | 6.26499e-48 | 1.000000 | 6.26499e-48 | 1.000000 |
| rad73                         | 1.03568e-48 | 1.000000 | 1.03568e-48 | 1.000000 |
| rad24                         | 2.55634e-49 | 1.000000 | 2.55634e-49 | 1.000000 |
| rad40syn                      | 2.29075e-49 | 1.000000 | 2.29075e-49 | 1.000000 |
| rad40anti                     | 1.86932e-49 | 1.000000 | 1.86932e-49 | 1.000000 |
| rad45                         | 1.75043e-49 | 1.000000 | 1.75043e-49 | 1.000000 |
| rad36                         | 1.07163e-50 | 1.000000 | 1.07163e-50 | 1.000000 |
| PAH8+H                        | 1.56151e-53 | 1.000000 | 1.56151e-53 | 1.000000 |
| rad71                         | 3.88539e-57 | 1.000000 | 3.88539e-57 | 1.000000 |
| rad8                          | 1.28435e-66 | 1.000000 | 1.28435e-66 | 1.000000 |

0.100000000E-06 Pa, 90.0000000 K

=====

| Rate constant             | True (fraction)        | Effective (fraction)   |
|---------------------------|------------------------|------------------------|
| Total                     | 7.74016e-16 (1.00 )    | 7.74016e-16 (1.00 )    |
| Formation of rad19        | 7.74016e-16 (1.000 )   | 7.74016e-16 (1.000 )   |
| H-abstraction to cyc2enyl | 2.91736e-25 (3.77e-10) | 2.91736e-25 (3.77e-10) |
| H-abstraction to cyclenyl | 1.47814e-33 (1.91e-18) | 1.47814e-33 (1.91e-18) |

| species    | PYtrue      | Cumul    | PYeffective | Cumul    |
|------------|-------------|----------|-------------|----------|
| Indene+H   | 0.999741    | 0.999741 | 0.999741    | 0.999741 |
| PhCHCCH2+H | 0.000245933 | 0.999987 | 0.000245933 | 0.999987 |
| PhCCH+CH3  | 4.29301e-06 | 0.999991 | 4.29301e-06 | 0.999991 |
| C2H2+PhCH2 | 3.12644e-06 | 0.999994 | 3.12644e-06 | 0.999994 |
| PhCCCH3+H  | 2.44411e-06 | 0.999997 | 2.44411e-06 | 0.999997 |
| Ph+MeAc    | 1.86289e-06 | 0.999999 | 1.86289e-06 | 0.999999 |
| rad67      | 5.60078e-07 | 0.999999 | 5.60078e-07 | 0.999999 |
| rad35      | 2.46332e-07 | 0.999999 | 2.46332e-07 | 0.999999 |
| Ph+Allene  | 1.71280e-07 | 1.000000 | 1.71280e-07 | 1.000000 |
| PAH7+H     | 2.19315e-08 | 1.000000 | 2.19315e-08 | 1.000000 |
| PhCH2CCH+H | 2.16239e-08 | 1.000000 | 2.16239e-08 | 1.000000 |
| rad39      | 6.18834e-09 | 1.000000 | 6.18834e-09 | 1.000000 |
| rad37      | 5.76057e-09 | 1.000000 | 5.76057e-09 | 1.000000 |

|                               |             |          |             |          |
|-------------------------------|-------------|----------|-------------|----------|
| rad30                         | 4.62113e-09 | 1.000000 | 4.62113e-09 | 1.000000 |
| Benzene+cycloprop-2-enylidene | 3.76912e-10 | 1.000000 | 3.76912e-10 | 1.000000 |
| PAH9+H                        | 3.15328e-10 | 1.000000 | 3.15328e-10 | 1.000000 |
| rad38                         | 1.35501e-10 | 1.000000 | 1.35501e-10 | 1.000000 |
| rad60syn                      | 2.13909e-11 | 1.000000 | 2.13909e-11 | 1.000000 |
| rad60anti                     | 1.05039e-11 | 1.000000 | 1.05039e-11 | 1.000000 |
| PAH3+H                        | 9.21902e-12 | 1.000000 | 9.21902e-12 | 1.000000 |
| PAH10+CH3                     | 8.64384e-12 | 1.000000 | 8.64384e-12 | 1.000000 |
| rad46                         | 8.28938e-12 | 1.000000 | 8.28938e-12 | 1.000000 |
| rad59                         | 1.88961e-12 | 1.000000 | 1.88961e-12 | 1.000000 |
| PhcycC3H3_A+H                 | 1.23243e-12 | 1.000000 | 1.23243e-12 | 1.000000 |
| rad43                         | 3.84868e-13 | 1.000000 | 3.84868e-13 | 1.000000 |
| rad54                         | 3.19699e-13 | 1.000000 | 3.19699e-13 | 1.000000 |
| rad62                         | 8.36058e-14 | 1.000000 | 8.36058e-14 | 1.000000 |
| rad50                         | 6.12578e-14 | 1.000000 | 6.12578e-14 | 1.000000 |
| rad70                         | 5.59583e-15 | 1.000000 | 5.59583e-15 | 1.000000 |
| rad55                         | 2.46957e-15 | 1.000000 | 2.46957e-15 | 1.000000 |
| Phenyl+cycC3H4                | 2.14284e-15 | 1.000000 | 0.00000     | 1.000000 |
| PAH1+H                        | 1.24557e-15 | 1.000000 | 1.24557e-15 | 1.000000 |
| rad52                         | 4.22957e-16 | 1.000000 | 4.22957e-16 | 1.000000 |
| rad58                         | 1.41714e-16 | 1.000000 | 1.41714e-16 | 1.000000 |
| rad51                         | 1.14155e-16 | 1.000000 | 1.14155e-16 | 1.000000 |
| rad34                         | 6.62496e-17 | 1.000000 | 6.62496e-17 | 1.000000 |
| PhcycC3H3_B+H                 | 1.04002e-17 | 1.000000 | 1.04002e-17 | 1.000000 |
| rad41                         | 9.07988e-18 | 1.000000 | 9.07988e-18 | 1.000000 |
| rad42                         | 8.13587e-18 | 1.000000 | 8.13587e-18 | 1.000000 |
| rad65                         | 2.36870e-18 | 1.000000 | 2.36870e-18 | 1.000000 |
| Benzene+cycloprop-1-enylidene | 1.90970e-18 | 1.000000 | 1.90970e-18 | 1.000000 |
| rad53                         | 2.02296e-22 | 1.000000 | 2.02296e-22 | 1.000000 |
| rad64                         | 4.24438e-24 | 1.000000 | 4.24438e-24 | 1.000000 |
| rad61                         | 4.05748e-28 | 1.000000 | 4.05748e-28 | 1.000000 |
| rad56                         | 1.28600e-30 | 1.000000 | 1.28600e-30 | 1.000000 |
| rad68syn                      | 2.85402e-32 | 1.000000 | 2.85402e-32 | 1.000000 |
| rad68anti                     | 2.36878e-32 | 1.000000 | 2.36878e-32 | 1.000000 |
| rad6                          | 1.82413e-32 | 1.000000 | 1.82413e-32 | 1.000000 |
| rad26                         | 9.50185e-33 | 1.000000 | 9.50185e-33 | 1.000000 |
| rad47                         | 7.75924e-33 | 1.000000 | 7.75924e-33 | 1.000000 |
| rad28                         | 3.36834e-33 | 1.000000 | 3.36834e-33 | 1.000000 |
| rad2                          | 5.44068e-35 | 1.000000 | 5.44068e-35 | 1.000000 |
| rad1                          | 3.48231e-36 | 1.000000 | 3.48231e-36 | 1.000000 |
| rad14                         | 3.08512e-36 | 1.000000 | 3.08512e-36 | 1.000000 |
| rad10                         | 2.77891e-36 | 1.000000 | 2.77891e-36 | 1.000000 |
| rad19anti                     | 2.57295e-36 | 1.000000 | 2.57295e-36 | 1.000000 |
| rad25                         | 1.53241e-36 | 1.000000 | 1.53241e-36 | 1.000000 |
| rad7                          | 1.32529e-36 | 1.000000 | 1.32529e-36 | 1.000000 |
| rad3                          | 6.14744e-37 | 1.000000 | 6.14744e-37 | 1.000000 |
| rad11                         | 3.29662e-37 | 1.000000 | 3.29662e-37 | 1.000000 |
| rad27                         | 3.19458e-37 | 1.000000 | 3.19458e-37 | 1.000000 |
| rad4                          | 3.11405e-37 | 1.000000 | 3.11405e-37 | 1.000000 |
| rad9                          | 9.84354e-39 | 1.000000 | 9.84354e-39 | 1.000000 |
| rad13                         | 7.34903e-39 | 1.000000 | 7.34903e-39 | 1.000000 |
| rad73                         | 1.45329e-39 | 1.000000 | 1.45329e-39 | 1.000000 |
| rad5                          | 9.80190e-40 | 1.000000 | 9.80190e-40 | 1.000000 |
| rad31                         | 9.34533e-41 | 1.000000 | 9.34533e-41 | 1.000000 |
| rad33                         | 3.08763e-41 | 1.000000 | 3.08763e-41 | 1.000000 |
| rad15                         | 4.30288e-42 | 1.000000 | 4.30288e-42 | 1.000000 |
| rad20                         | 1.36436e-43 | 1.000000 | 1.36436e-43 | 1.000000 |
| rad21                         | 1.10875e-43 | 1.000000 | 1.10875e-43 | 1.000000 |
| rad12                         | 1.98314e-45 | 1.000000 | 1.98314e-45 | 1.000000 |
| rad18                         | 1.31033e-45 | 1.000000 | 1.31033e-45 | 1.000000 |
| rad19syn                      | 1.05530e-45 | 1.000000 | 1.05530e-45 | 1.000000 |
| rad40syn                      | 5.28600e-47 | 1.000000 | 5.28600e-47 | 1.000000 |
| rad40anti                     | 4.29340e-47 | 1.000000 | 4.29340e-47 | 1.000000 |
| rad23                         | 2.52912e-47 | 1.000000 | 2.52912e-47 | 1.000000 |
| rad22                         | 5.77551e-48 | 1.000000 | 5.77551e-48 | 1.000000 |
| rad24                         | 2.88496e-49 | 1.000000 | 2.88496e-49 | 1.000000 |
| rad45                         | 2.11025e-49 | 1.000000 | 2.11025e-49 | 1.000000 |
| rad36                         | 1.29186e-50 | 1.000000 | 1.29186e-50 | 1.000000 |
| PAH8+H                        | 4.16081e-51 | 1.000000 | 4.16081e-51 | 1.000000 |
| rad71                         | 1.29280e-54 | 1.000000 | 1.29280e-54 | 1.000000 |
| rad8                          | 1.61985e-66 | 1.000000 | 1.61985e-66 | 1.000000 |

0.100000000E-06 Pa, 100.000000 K

| Rate constant             | True (fraction)        | Effective (fraction)   |
|---------------------------|------------------------|------------------------|
| Total                     | 1.28255e-15 (1.00 )    | 1.28255e-15 (1.00 )    |
| Formation of rad19        | 1.28255e-15 (1.000 )   | 1.28255e-15 (1.000 )   |
| H-abstraction to cyc2enyl | 4.68359e-24 (3.65e-09) | 4.68359e-24 (3.65e-09) |
| H-abstraction to cyclenyl | 1.66242e-31 (1.30e-16) | 1.66242e-31 (1.30e-16) |



| species                       | PYtrue      | Cumul    | PYeffective | Cumul    |
|-------------------------------|-------------|----------|-------------|----------|
| Indene+H                      | 0.999735    | 0.999735 | 0.999735    | 0.999735 |
| PhCHCCH2+H                    | 0.000251988 | 0.999987 | 0.000251988 | 0.999987 |
| PhCCH+CH3                     | 4.40736e-06 | 0.999991 | 4.40736e-06 | 0.999991 |
| C2H2+PhCH2                    | 3.22690e-06 | 0.999995 | 3.22690e-06 | 0.999995 |
| PhCCCH3+H                     | 2.51589e-06 | 0.999997 | 2.51589e-06 | 0.999997 |
| Ph+MeAc                       | 1.92987e-06 | 0.999999 | 1.92987e-06 | 0.999999 |
| rad67                         | 5.79181e-07 | 1.000000 | 5.79181e-07 | 1.000000 |
| rad35                         | 2.54382e-07 | 1.000000 | 2.54382e-07 | 1.000000 |
| Ph+Allene                     | 1.79627e-07 | 1.000000 | 1.79627e-07 | 1.000000 |
| PhCH2CCH+H                    | 2.28536e-08 | 1.000000 | 2.28536e-08 | 1.000000 |
| PAH7+H                        | 2.28426e-08 | 1.000000 | 2.28426e-08 | 1.000000 |
| rad39                         | 6.44590e-09 | 1.000000 | 6.44590e-09 | 1.000000 |
| rad37                         | 6.01471e-09 | 1.000000 | 6.01471e-09 | 1.000000 |
| rad30                         | 4.77610e-09 | 1.000000 | 4.77610e-09 | 1.000000 |
| Benzene+cycloprop-2-enylidene | 3.65179e-09 | 1.000000 | 3.65179e-09 | 1.000000 |
| PAH9+H                        | 3.29134e-10 | 1.000000 | 3.29134e-10 | 1.000000 |
| rad38                         | 1.42033e-10 | 1.000000 | 1.42033e-10 | 1.000000 |
| rad60syn                      | 2.24039e-11 | 1.000000 | 2.24039e-11 | 1.000000 |
| rad60anti                     | 1.10144e-11 | 1.000000 | 1.10144e-11 | 1.000000 |
| PAH3+H                        | 9.81802e-12 | 1.000000 | 9.81802e-12 | 1.000000 |
| PAH10+CH3                     | 9.45058e-12 | 1.000000 | 9.45058e-12 | 1.000000 |
| rad46                         | 8.71962e-12 | 1.000000 | 8.71962e-12 | 1.000000 |
| rad59                         | 2.00730e-12 | 1.000000 | 2.00730e-12 | 1.000000 |
| PhcycC3H3_A+H                 | 1.51348e-12 | 1.000000 | 1.51348e-12 | 1.000000 |
| rad43                         | 4.16368e-13 | 1.000000 | 4.16368e-13 | 1.000000 |
| rad54                         | 3.49137e-13 | 1.000000 | 3.49137e-13 | 1.000000 |
| rad62                         | 9.06791e-14 | 1.000000 | 9.06791e-14 | 1.000000 |
| rad50                         | 6.59742e-14 | 1.000000 | 6.59742e-14 | 1.000000 |
| rad70                         | 6.28192e-15 | 1.000000 | 6.28192e-15 | 1.000000 |
| Phenyl+cycC3H4                | 3.36905e-15 | 1.000000 | 0.000000    | 1.000000 |
| rad55                         | 2.77429e-15 | 1.000000 | 2.77429e-15 | 1.000000 |
| PAH1+H                        | 1.46129e-15 | 1.000000 | 1.46129e-15 | 1.000000 |
| rad52                         | 4.63813e-16 | 1.000000 | 4.63813e-16 | 1.000000 |
| rad58                         | 1.61019e-16 | 1.000000 | 1.61019e-16 | 1.000000 |
| Benzene+cycloprop-1-enylidene | 1.29619e-16 | 1.000000 | 1.29619e-16 | 1.000000 |
| rad51                         | 1.27976e-16 | 1.000000 | 1.27976e-16 | 1.000000 |
| rad34                         | 7.79214e-17 | 1.000000 | 7.79214e-17 | 1.000000 |
| PhcycC3H3_B+H                 | 4.09123e-17 | 1.000000 | 4.09123e-17 | 1.000000 |
| rad41                         | 1.13186e-17 | 1.000000 | 1.13186e-17 | 1.000000 |
| rad42                         | 9.88346e-18 | 1.000000 | 9.88346e-18 | 1.000000 |
| rad65                         | 2.68465e-18 | 1.000000 | 2.68465e-18 | 1.000000 |
| rad53                         | 7.24662e-22 | 1.000000 | 7.24662e-22 | 1.000000 |
| rad64                         | 2.36968e-23 | 1.000000 | 2.36968e-23 | 1.000000 |
| rad61                         | 9.04334e-27 | 1.000000 | 9.04334e-27 | 1.000000 |
| rad56                         | 5.01134e-29 | 1.000000 | 5.01134e-29 | 1.000000 |
| rad68syn                      | 1.54810e-30 | 1.000000 | 1.54810e-30 | 1.000000 |
| rad68anti                     | 1.27120e-30 | 1.000000 | 1.27120e-30 | 1.000000 |
| rad6                          | 1.43557e-32 | 1.000000 | 1.43557e-32 | 1.000000 |
| rad26                         | 8.25861e-33 | 1.000000 | 8.25861e-33 | 1.000000 |
| rad47                         | 7.18611e-33 | 1.000000 | 7.18611e-33 | 1.000000 |
| rad28                         | 2.84459e-33 | 1.000000 | 2.84459e-33 | 1.000000 |
| rad2                          | 6.01348e-35 | 1.000000 | 6.01348e-35 | 1.000000 |
| rad19anti                     | 4.30712e-36 | 1.000000 | 4.30712e-36 | 1.000000 |
| rad1                          | 3.86135e-36 | 1.000000 | 3.86135e-36 | 1.000000 |
| rad10                         | 3.11006e-36 | 1.000000 | 3.11006e-36 | 1.000000 |
| rad14                         | 2.84700e-36 | 1.000000 | 2.84700e-36 | 1.000000 |
| rad40syn                      | 1.99128e-36 | 1.000000 | 1.99128e-36 | 1.000000 |
| rad40anti                     | 1.51571e-36 | 1.000000 | 1.51571e-36 | 1.000000 |
| rad25                         | 1.43562e-36 | 1.000000 | 1.43562e-36 | 1.000000 |
| rad7                          | 1.04461e-36 | 1.000000 | 1.04461e-36 | 1.000000 |
| rad73                         | 7.52968e-37 | 1.000000 | 7.52968e-37 | 1.000000 |
| rad3                          | 7.40531e-37 | 1.000000 | 7.40531e-37 | 1.000000 |
| rad4                          | 3.75417e-37 | 1.000000 | 3.75417e-37 | 1.000000 |
| rad27                         | 3.01339e-37 | 1.000000 | 3.01339e-37 | 1.000000 |
| rad11                         | 2.60720e-37 | 1.000000 | 2.60720e-37 | 1.000000 |
| rad9                          | 1.05375e-38 | 1.000000 | 1.05375e-38 | 1.000000 |
| rad13                         | 5.79807e-39 | 1.000000 | 5.79807e-39 | 1.000000 |
| rad5                          | 8.57546e-40 | 1.000000 | 8.57546e-40 | 1.000000 |
| rad31                         | 1.36779e-40 | 1.000000 | 1.36779e-40 | 1.000000 |
| rad33                         | 2.82050e-41 | 1.000000 | 2.82050e-41 | 1.000000 |
| rad15                         | 4.61033e-42 | 1.000000 | 4.61033e-42 | 1.000000 |
| rad20                         | 1.42817e-43 | 1.000000 | 1.42817e-43 | 1.000000 |
| rad21                         | 1.16777e-43 | 1.000000 | 1.16777e-43 | 1.000000 |
| rad12                         | 2.45644e-45 | 1.000000 | 2.45644e-45 | 1.000000 |
| rad19syn                      | 2.08907e-45 | 1.000000 | 2.08907e-45 | 1.000000 |
| rad18                         | 1.28566e-45 | 1.000000 | 1.28566e-45 | 1.000000 |
| rad23                         | 3.20904e-47 | 1.000000 | 3.20904e-47 | 1.000000 |

|        |             |         |             |         |
|--------|-------------|---------|-------------|---------|
| rad22  | 5.43760e-48 | 1.00000 | 5.43760e-48 | 1.00000 |
| PAH8+H | 2.22239e-48 | 1.00000 | 2.22239e-48 | 1.00000 |
| rad24  | 3.36890e-49 | 1.00000 | 3.36890e-49 | 1.00000 |
| rad45  | 2.83381e-49 | 1.00000 | 2.83381e-49 | 1.00000 |
| rad36  | 1.73501e-50 | 1.00000 | 1.73501e-50 | 1.00000 |
| rad71  | 8.99607e-52 | 1.00000 | 8.99607e-52 | 1.00000 |
| rad8   | 2.12436e-66 | 1.00000 | 2.12436e-66 | 1.00000 |

0.100000000E-06 Pa, 110.000000 K

| Rate constant             | True (fraction)        | Effective (fraction)   |
|---------------------------|------------------------|------------------------|
| Total                     | 1.95524e-15 (1.00 )    | 1.95524e-15 (1.00 )    |
| Formation of rad19        | 1.95524e-15 (1.000 )   | 1.95524e-15 (1.000 )   |
| H-abstraction to cyc2enyl | 4.50936e-23 (2.31e-08) | 4.50936e-23 (2.31e-08) |
| H-abstraction to cyclenyl | 7.87782e-30 (4.03e-15) | 7.87782e-30 (4.03e-15) |

| species                       | PYtrue      | Cumul    | PYeffective | Cumul    |
|-------------------------------|-------------|----------|-------------|----------|
| Indene+H                      | 0.999728    | 0.999728 | 0.999728    | 0.999728 |
| PhCHCCH2+H                    | 0.000258470 | 0.999986 | 0.000258470 | 0.999986 |
| PhCCH+CH3                     | 4.52973e-06 | 0.999991 | 4.52973e-06 | 0.999991 |
| C2H2+PhCH2                    | 3.33534e-06 | 0.999994 | 3.33534e-06 | 0.999994 |
| PhCCCH3+H                     | 2.59304e-06 | 0.999997 | 2.59304e-06 | 0.999997 |
| Ph+MeAc                       | 2.00241e-06 | 0.999999 | 2.00241e-06 | 0.999999 |
| rad67                         | 5.99841e-07 | 1.000000 | 5.99841e-07 | 1.000000 |
| rad35                         | 2.63077e-07 | 1.000000 | 2.63077e-07 | 1.000000 |
| Ph+Allene                     | 1.88813e-07 | 1.000000 | 1.88813e-07 | 1.000000 |
| PhCH2CCH+H                    | 2.42192e-08 | 1.000000 | 2.42192e-08 | 1.000000 |
| PAH7+H                        | 2.38371e-08 | 1.000000 | 2.38371e-08 | 1.000000 |
| Benzene+cycloprop-2-enylidene | 2.30629e-08 | 1.000000 | 2.30629e-08 | 1.000000 |
| rad39                         | 6.72692e-09 | 1.000000 | 6.72692e-09 | 1.000000 |
| rad37                         | 6.29278e-09 | 1.000000 | 6.29278e-09 | 1.000000 |
| rad30                         | 4.94382e-09 | 1.000000 | 4.94382e-09 | 1.000000 |
| PAH9+H                        | 3.44262e-10 | 1.000000 | 3.44262e-10 | 1.000000 |
| rad38                         | 1.49234e-10 | 1.000000 | 1.49234e-10 | 1.000000 |
| rad60syn                      | 2.35177e-11 | 1.000000 | 2.35177e-11 | 1.000000 |
| rad60anti                     | 1.15765e-11 | 1.000000 | 1.15765e-11 | 1.000000 |
| PAH3+H                        | 1.04898e-11 | 1.000000 | 1.04898e-11 | 1.000000 |
| PAH10+CH3                     | 1.03809e-11 | 1.000000 | 1.03809e-11 | 1.000000 |
| rad46                         | 9.19554e-12 | 1.000000 | 9.19554e-12 | 1.000000 |
| rad59                         | 2.13885e-12 | 1.000000 | 2.13885e-12 | 1.000000 |
| PhcycC3H3_A+H                 | 1.87147e-12 | 1.000000 | 1.87147e-12 | 1.000000 |
| rad43                         | 4.52200e-13 | 1.000000 | 4.52200e-13 | 1.000000 |
| rad54                         | 3.83059e-13 | 1.000000 | 3.83059e-13 | 1.000000 |
| rad62                         | 9.87359e-14 | 1.000000 | 9.87359e-14 | 1.000000 |
| rad50                         | 7.13397e-14 | 1.000000 | 7.13397e-14 | 1.000000 |
| rad70                         | 7.09592e-15 | 1.000000 | 7.09592e-15 | 1.000000 |
| Phenyl+cycC3H4                | 5.18630e-15 | 1.000000 | 0.000000    | 1.000000 |
| Benzene+cycloprop-1-enylidene | 4.02908e-15 | 1.000000 | 4.02908e-15 | 1.000000 |
| rad55                         | 3.13590e-15 | 1.000000 | 3.13590e-15 | 1.000000 |
| PAH1+H                        | 1.72857e-15 | 1.000000 | 1.72857e-15 | 1.000000 |
| rad52                         | 5.11263e-16 | 1.000000 | 5.11263e-16 | 1.000000 |
| rad58                         | 1.84232e-16 | 1.000000 | 1.84232e-16 | 1.000000 |
| rad51                         | 1.44427e-16 | 1.000000 | 1.44427e-16 | 1.000000 |
| PhcycC3H3_B+H                 | 1.30407e-16 | 1.000000 | 1.30407e-16 | 1.000000 |
| rad34                         | 9.24233e-17 | 1.000000 | 9.24233e-17 | 1.000000 |
| rad41                         | 1.42061e-17 | 1.000000 | 1.42061e-17 | 1.000000 |
| rad42                         | 1.20969e-17 | 1.000000 | 1.20969e-17 | 1.000000 |
| rad65                         | 3.06485e-18 | 1.000000 | 3.06485e-18 | 1.000000 |
| rad53                         | 2.11093e-21 | 1.000000 | 2.11093e-21 | 1.000000 |
| rad64                         | 9.96387e-23 | 1.000000 | 9.96387e-23 | 1.000000 |
| rad61                         | 1.15972e-25 | 1.000000 | 1.15972e-25 | 1.000000 |
| rad56                         | 1.00969e-27 | 1.000000 | 1.00969e-27 | 1.000000 |
| rad68syn                      | 4.04803e-29 | 1.000000 | 4.04803e-29 | 1.000000 |
| rad68anti                     | 3.29762e-29 | 1.000000 | 3.29762e-29 | 1.000000 |
| rad6                          | 1.16840e-32 | 1.000000 | 1.16840e-32 | 1.000000 |
| rad26                         | 7.29270e-33 | 1.000000 | 7.29270e-33 | 1.000000 |
| rad47                         | 6.77037e-33 | 1.000000 | 6.77037e-33 | 1.000000 |
| rad28                         | 2.44795e-33 | 1.000000 | 2.44795e-33 | 1.000000 |
| rad40syn                      | 3.23201e-34 | 1.000000 | 3.23201e-34 | 1.000000 |
| rad40anti                     | 2.54378e-34 | 1.000000 | 2.54378e-34 | 1.000000 |
| rad2                          | 7.26995e-35 | 1.000000 | 7.26995e-35 | 1.000000 |
| rad73                         | 5.48405e-35 | 1.000000 | 5.48405e-35 | 1.000000 |
| rad19anti                     | 7.70499e-36 | 1.000000 | 7.70499e-36 | 1.000000 |
| rad1                          | 4.68468e-36 | 1.000000 | 4.68468e-36 | 1.000000 |
| rad10                         | 3.73207e-36 | 1.000000 | 3.73207e-36 | 1.000000 |
| rad14                         | 2.67104e-36 | 1.000000 | 2.67104e-36 | 1.000000 |
| rad25                         | 1.36801e-36 | 1.000000 | 1.36801e-36 | 1.000000 |
| rad3                          | 8.75575e-37 | 1.000000 | 8.75575e-37 | 1.000000 |

|          |             |         |             |         |
|----------|-------------|---------|-------------|---------|
| rad7     | 8.51587e-37 | 1.00000 | 8.51587e-37 | 1.00000 |
| rad4     | 4.44267e-37 | 1.00000 | 4.44267e-37 | 1.00000 |
| rad27    | 2.89291e-37 | 1.00000 | 2.89291e-37 | 1.00000 |
| rad11    | 2.13321e-37 | 1.00000 | 2.13321e-37 | 1.00000 |
| rad9     | 1.17315e-38 | 1.00000 | 1.17315e-38 | 1.00000 |
| rad13    | 4.73145e-39 | 1.00000 | 4.73145e-39 | 1.00000 |
| rad5     | 7.63885e-40 | 1.00000 | 7.63885e-40 | 1.00000 |
| rad31    | 2.11318e-40 | 1.00000 | 2.11318e-40 | 1.00000 |
| rad33    | 2.68245e-41 | 1.00000 | 2.68245e-41 | 1.00000 |
| rad15    | 5.13735e-42 | 1.00000 | 5.13735e-42 | 1.00000 |
| rad20    | 1.52952e-43 | 1.00000 | 1.52952e-43 | 1.00000 |
| rad21    | 1.25888e-43 | 1.00000 | 1.25888e-43 | 1.00000 |
| rad19syn | 4.31564e-45 | 1.00000 | 4.31564e-45 | 1.00000 |
| rad12    | 3.15075e-45 | 1.00000 | 3.15075e-45 | 1.00000 |
| rad18    | 1.28508e-45 | 1.00000 | 1.28508e-45 | 1.00000 |
| PAH8+H   | 1.08851e-45 | 1.00000 | 1.08851e-45 | 1.00000 |
| rad23    | 4.52531e-47 | 1.00000 | 4.52531e-47 | 1.00000 |
| rad22    | 5.20592e-48 | 1.00000 | 5.20592e-48 | 1.00000 |
| rad71    | 5.50109e-49 | 1.00000 | 5.50109e-49 | 1.00000 |
| rad45    | 4.24562e-49 | 1.00000 | 4.24562e-49 | 1.00000 |
| rad24    | 4.05123e-49 | 1.00000 | 4.05123e-49 | 1.00000 |
| rad36    | 2.60019e-50 | 1.00000 | 2.60019e-50 | 1.00000 |
| rad8     | 2.88050e-66 | 1.00000 | 2.88050e-66 | 1.00000 |

0.100000000E-06 Pa, 120.000000 K

| Rate constant             | True (fraction)        | Effective (fraction)   |
|---------------------------|------------------------|------------------------|
| Total                     | 2.79817e-15 (1.00 )    | 2.79817e-15 (1.00 )    |
| Formation of rad19        | 2.79817e-15 (1.000 )   | 2.79817e-15 (1.000 )   |
| H-abstraction to cyc2enyl | 2.96039e-22 (1.06e-07) | 2.96039e-22 (1.06e-07) |
| H-abstraction to cyclenyl | 1.95323e-28 (6.98e-14) | 1.95323e-28 (6.98e-14) |

| species                       | PYtrue      | Cumul    | PYeffective | Cumul    |
|-------------------------------|-------------|----------|-------------|----------|
| Indene+H                      | 0.999721    | 0.999721 | 0.999721    | 0.999721 |
| PhCHCCH2+H                    | 0.000265418 | 0.999986 | 0.000265418 | 0.999986 |
| PhCCH+CH3                     | 4.66083e-06 | 0.999991 | 4.66083e-06 | 0.999991 |
| C2H2+PhCH2                    | 3.45258e-06 | 0.999994 | 3.45258e-06 | 0.999994 |
| PhCCCH3+H                     | 2.67609e-06 | 0.999997 | 2.67609e-06 | 0.999997 |
| Ph+MeAc                       | 2.08110e-06 | 0.999999 | 2.08110e-06 | 0.999999 |
| rad67                         | 6.22225e-07 | 1.000000 | 6.22225e-07 | 1.000000 |
| rad35                         | 2.72481e-07 | 1.000000 | 2.72481e-07 | 1.000000 |
| Ph+Allene                     | 1.98950e-07 | 1.000000 | 1.98950e-07 | 1.000000 |
| Benzene+cycloprop-2-enylidene | 1.05797e-07 | 1.000000 | 1.05797e-07 | 1.000000 |
| PhCH2CCH+H                    | 2.57407e-08 | 1.000000 | 2.57407e-08 | 1.000000 |
| PAH7+H                        | 2.49248e-08 | 1.000000 | 2.49248e-08 | 1.000000 |
| rad39                         | 7.03419e-09 | 1.000000 | 7.03419e-09 | 1.000000 |
| rad37                         | 6.59774e-09 | 1.000000 | 6.59774e-09 | 1.000000 |
| rad30                         | 5.12566e-09 | 1.000000 | 5.12566e-09 | 1.000000 |
| PAH9+H                        | 3.60882e-10 | 1.000000 | 3.60882e-10 | 1.000000 |
| rad38                         | 1.57196e-10 | 1.000000 | 1.57196e-10 | 1.000000 |
| rad60syn                      | 2.47458e-11 | 1.000000 | 2.47458e-11 | 1.000000 |
| rad60anti                     | 1.21972e-11 | 1.000000 | 1.21972e-11 | 1.000000 |
| PAH10+CH3                     | 1.14592e-11 | 1.000000 | 1.14592e-11 | 1.000000 |
| PAH3+H                        | 1.12460e-11 | 1.000000 | 1.12460e-11 | 1.000000 |
| rad46                         | 9.72362e-12 | 1.000000 | 9.72362e-12 | 1.000000 |
| PhcycC3H3_A+H                 | 2.33055e-12 | 1.000000 | 2.33055e-12 | 1.000000 |
| rad59                         | 2.28645e-12 | 1.000000 | 2.28645e-12 | 1.000000 |
| rad43                         | 4.93137e-13 | 1.000000 | 4.93137e-13 | 1.000000 |
| rad54                         | 4.22356e-13 | 1.000000 | 4.22356e-13 | 1.000000 |
| rad62                         | 1.07952e-13 | 1.000000 | 1.07952e-13 | 1.000000 |
| rad50                         | 7.74736e-14 | 1.000000 | 7.74736e-14 | 1.000000 |
| Benzene+cycloprop-1-enylidene | 6.98038e-14 | 1.000000 | 6.98038e-14 | 1.000000 |
| rad70                         | 8.06832e-15 | 1.000000 | 8.06832e-15 | 1.000000 |
| Phenyl+cycC3H4                | 7.86468e-15 | 1.000000 | 0.000000    | 1.000000 |
| rad55                         | 3.56798e-15 | 1.000000 | 3.56798e-15 | 1.000000 |
| PAH1+H                        | 2.06260e-15 | 1.000000 | 2.06260e-15 | 1.000000 |
| rad52                         | 5.66713e-16 | 1.000000 | 5.66713e-16 | 1.000000 |
| PhcycC3H3_B+H                 | 3.56809e-16 | 1.000000 | 3.56809e-16 | 1.000000 |
| rad58                         | 2.12355e-16 | 1.000000 | 2.12355e-16 | 1.000000 |
| rad51                         | 1.64161e-16 | 1.000000 | 1.64161e-16 | 1.000000 |
| rad34                         | 1.10600e-16 | 1.000000 | 1.10600e-16 | 1.000000 |
| rad41                         | 1.79639e-17 | 1.000000 | 1.79639e-17 | 1.000000 |
| rad42                         | 1.49203e-17 | 1.000000 | 1.49203e-17 | 1.000000 |
| rad65                         | 3.52612e-18 | 1.000000 | 3.52612e-18 | 1.000000 |
| rad53                         | 5.31328e-21 | 1.000000 | 5.31328e-21 | 1.000000 |
| rad64                         | 3.40977e-22 | 1.000000 | 3.40977e-22 | 1.000000 |
| rad61                         | 9.89208e-25 | 1.000000 | 9.89208e-25 | 1.000000 |
| rad56                         | 1.24744e-26 | 1.000000 | 1.24744e-26 | 1.000000 |

|           |             |         |             |         |
|-----------|-------------|---------|-------------|---------|
| rad68syn  | 6.17070e-28 | 1.00000 | 6.17070e-28 | 1.00000 |
| rad68anti | 4.99495e-28 | 1.00000 | 4.99495e-28 | 1.00000 |
| rad40syn  | 1.64573e-32 | 1.00000 | 1.64573e-32 | 1.00000 |
| rad40anti | 1.29414e-32 | 1.00000 | 1.29414e-32 | 1.00000 |
| rad6      | 9.79606e-33 | 1.00000 | 9.79606e-33 | 1.00000 |
| rad26     | 6.52219e-33 | 1.00000 | 6.52219e-33 | 1.00000 |
| rad47     | 6.47610e-33 | 1.00000 | 6.47610e-33 | 1.00000 |
| rad28     | 2.13846e-33 | 1.00000 | 2.13846e-33 | 1.00000 |
| rad73     | 1.92333e-33 | 1.00000 | 1.92333e-33 | 1.00000 |
| rad2      | 9.20564e-35 | 1.00000 | 9.20564e-35 | 1.00000 |
| PAH8+H    | 4.13571e-35 | 1.00000 | 4.13571e-35 | 1.00000 |
| rad19anti | 1.46733e-35 | 1.00000 | 1.46733e-35 | 1.00000 |
| rad1      | 5.95498e-36 | 1.00000 | 5.95498e-36 | 1.00000 |
| rad10     | 4.71201e-36 | 1.00000 | 4.71201e-36 | 1.00000 |
| rad14     | 2.54078e-36 | 1.00000 | 2.54078e-36 | 1.00000 |
| rad25     | 1.32229e-36 | 1.00000 | 1.32229e-36 | 1.00000 |
| rad3      | 1.11941e-36 | 1.00000 | 1.11941e-36 | 1.00000 |
| rad7      | 7.15201e-37 | 1.00000 | 7.15201e-37 | 1.00000 |
| rad4      | 5.68540e-37 | 1.00000 | 5.68540e-37 | 1.00000 |
| rad27     | 2.81864e-37 | 1.00000 | 2.81864e-37 | 1.00000 |
| rad11     | 1.79855e-37 | 1.00000 | 1.79855e-37 | 1.00000 |
| rad9      | 1.35095e-38 | 1.00000 | 1.35095e-38 | 1.00000 |
| rad71     | 1.32207e-38 | 1.00000 | 1.32207e-38 | 1.00000 |
| rad13     | 3.97795e-39 | 1.00000 | 3.97795e-39 | 1.00000 |
| rad5      | 6.90338e-40 | 1.00000 | 6.90338e-40 | 1.00000 |
| rad31     | 3.43447e-40 | 1.00000 | 3.43447e-40 | 1.00000 |
| rad33     | 2.63979e-41 | 1.00000 | 2.63979e-41 | 1.00000 |
| rad15     | 5.92155e-42 | 1.00000 | 5.92155e-42 | 1.00000 |
| rad20     | 1.67073e-43 | 1.00000 | 1.67073e-43 | 1.00000 |
| rad21     | 1.38476e-43 | 1.00000 | 1.38476e-43 | 1.00000 |
| rad19syn  | 9.31466e-45 | 1.00000 | 9.31466e-45 | 1.00000 |
| rad12     | 4.17014e-45 | 1.00000 | 4.17014e-45 | 1.00000 |
| rad18     | 1.30458e-45 | 1.00000 | 1.30458e-45 | 1.00000 |
| rad23     | 7.04778e-47 | 1.00000 | 7.04778e-47 | 1.00000 |
| rad22     | 5.05282e-48 | 1.00000 | 5.05282e-48 | 1.00000 |
| rad45     | 7.15645e-49 | 1.00000 | 7.15645e-49 | 1.00000 |
| rad24     | 5.00050e-49 | 1.00000 | 5.00050e-49 | 1.00000 |
| rad36     | 4.38505e-50 | 1.00000 | 4.38505e-50 | 1.00000 |
| rad8      | 4.02249e-66 | 1.00000 | 4.02249e-66 | 1.00000 |

0.100000000E-06 Pa, 130.000000 K

| Rate constant             | True (fraction)        | Effective (fraction)   |
|---------------------------|------------------------|------------------------|
| Total                     | 3.81236e-15 (1.00 )    | 3.81236e-15 (1.00 )    |
| Formation of rad19        | 3.81236e-15 (1.000 )   | 3.81236e-15 (1.000 )   |
| H-abstraction to cyc2enyl | 1.44825e-21 (3.80e-07) | 1.44825e-21 (3.80e-07) |
| H-abstraction to cyclenyl | 2.94348e-27 (7.72e-13) | 2.94348e-27 (7.72e-13) |

| species                       | PYtrue      | Cumul    | PYeffective | Cumul    |
|-------------------------------|-------------|----------|-------------|----------|
| Indene+H                      | 0.999713    | 0.999713 | 0.999713    | 0.999713 |
| PhCHCCH2+H                    | 0.000272881 | 0.999986 | 0.000272881 | 0.999986 |
| PhCCH+CH3                     | 4.80155e-06 | 0.999990 | 4.80155e-06 | 0.999990 |
| C2H2+PhCH2                    | 3.57965e-06 | 0.999994 | 3.57965e-06 | 0.999994 |
| PhCCCH3+H                     | 2.76568e-06 | 0.999997 | 2.76568e-06 | 0.999997 |
| Ph+MeAc                       | 2.16669e-06 | 0.999999 | 2.16669e-06 | 0.999999 |
| rad67                         | 6.46538e-07 | 0.999999 | 6.46538e-07 | 0.999999 |
| Benzene+cycloprop-2-enylidene | 3.79882e-07 | 1.000000 | 3.79882e-07 | 1.000000 |
| rad35                         | 2.82679e-07 | 1.000000 | 2.82679e-07 | 1.000000 |
| Ph+Allene                     | 2.10177e-07 | 1.000000 | 2.10177e-07 | 1.000000 |
| PhCH2CCH+H                    | 2.74426e-08 | 1.000000 | 2.74426e-08 | 1.000000 |
| PAH7+H                        | 2.61181e-08 | 1.000000 | 2.61181e-08 | 1.000000 |
| rad39                         | 7.37119e-09 | 1.000000 | 7.37119e-09 | 1.000000 |
| rad37                         | 6.93326e-09 | 1.000000 | 6.93326e-09 | 1.000000 |
| rad30                         | 5.32333e-09 | 1.000000 | 5.32333e-09 | 1.000000 |
| PAH9+H                        | 3.79203e-10 | 1.000000 | 3.79203e-10 | 1.000000 |
| rad38                         | 1.66034e-10 | 1.000000 | 1.66034e-10 | 1.000000 |
| rad60syn                      | 2.61047e-11 | 1.000000 | 2.61047e-11 | 1.000000 |
| rad60anti                     | 1.28850e-11 | 1.000000 | 1.28850e-11 | 1.000000 |
| PAH10+CH3                     | 1.27171e-11 | 1.000000 | 1.27171e-11 | 1.000000 |
| PAH3+H                        | 1.21014e-11 | 1.000000 | 1.21014e-11 | 1.000000 |
| rad46                         | 1.03119e-11 | 1.000000 | 1.03119e-11 | 1.000000 |
| PhcycC3H3_A+H                 | 2.92361e-12 | 1.000000 | 2.92361e-12 | 1.000000 |
| rad59                         | 2.45281e-12 | 1.000000 | 2.45281e-12 | 1.000000 |
| Benzene+cycloprop-1-enylidene | 7.72089e-13 | 1.000000 | 7.72089e-13 | 1.000000 |
| rad43                         | 5.40149e-13 | 1.000000 | 5.40149e-13 | 1.000000 |
| rad54                         | 4.68163e-13 | 1.000000 | 4.68163e-13 | 1.000000 |
| rad62                         | 1.18546e-13 | 1.000000 | 1.18546e-13 | 1.000000 |
| rad50                         | 8.45270e-14 | 1.000000 | 8.45270e-14 | 1.000000 |

|                |             |         |             |         |
|----------------|-------------|---------|-------------|---------|
| Phenyl+cycC3H4 | 1.18041e-14 | 1.00000 | 0.00000     | 1.00000 |
| rad70          | 9.23899e-15 | 1.00000 | 9.23899e-15 | 1.00000 |
| rad55          | 4.08826e-15 | 1.00000 | 4.08826e-15 | 1.00000 |
| PAH1+H         | 2.48400e-15 | 1.00000 | 2.48400e-15 | 1.00000 |
| PhcycC3H3_B+H  | 8.71416e-16 | 1.00000 | 8.71416e-16 | 1.00000 |
| rad52          | 6.31980e-16 | 1.00000 | 6.31980e-16 | 1.00000 |
| rad58          | 2.46721e-16 | 1.00000 | 2.46721e-16 | 1.00000 |
| rad51          | 1.88040e-16 | 1.00000 | 1.88040e-16 | 1.00000 |
| rad34          | 1.33600e-16 | 1.00000 | 1.33600e-16 | 1.00000 |
| rad41          | 2.28987e-17 | 1.00000 | 2.28987e-17 | 1.00000 |
| rad42          | 1.85493e-17 | 1.00000 | 1.85493e-17 | 1.00000 |
| rad65          | 4.09095e-18 | 1.00000 | 4.09095e-18 | 1.00000 |
| rad53          | 1.20428e-20 | 1.00000 | 1.20428e-20 | 1.00000 |
| rad64          | 1.00149e-21 | 1.00000 | 1.00149e-21 | 1.00000 |
| rad61          | 6.20139e-24 | 1.00000 | 6.20139e-24 | 1.00000 |
| rad56          | 1.06325e-25 | 1.00000 | 1.06325e-25 | 1.00000 |
| rad68syn       | 6.24507e-27 | 1.00000 | 6.24507e-27 | 1.00000 |
| rad68anti      | 5.02761e-27 | 1.00000 | 5.02761e-27 | 1.00000 |
| rad40syn       | 4.43601e-31 | 1.00000 | 4.43601e-31 | 1.00000 |
| rad40anti      | 3.49255e-31 | 1.00000 | 3.49255e-31 | 1.00000 |
| rad73          | 3.97404e-32 | 1.00000 | 3.97404e-32 | 1.00000 |
| rad6           | 8.45136e-33 | 1.00000 | 8.45136e-33 | 1.00000 |
| rad47          | 6.28095e-33 | 1.00000 | 6.28095e-33 | 1.00000 |
| rad26          | 5.89416e-33 | 1.00000 | 5.89416e-33 | 1.00000 |
| PAH8+H         | 2.25812e-33 | 1.00000 | 2.25812e-33 | 1.00000 |
| rad28          | 1.89100e-33 | 1.00000 | 1.89100e-33 | 1.00000 |
| rad2           | 1.21991e-34 | 1.00000 | 1.21991e-34 | 1.00000 |
| rad19anti      | 2.96678e-35 | 1.00000 | 2.96678e-35 | 1.00000 |
| rad1           | 7.92471e-36 | 1.00000 | 7.92471e-36 | 1.00000 |
| rad10          | 6.22935e-36 | 1.00000 | 6.22935e-36 | 1.00000 |
| rad14          | 2.44551e-36 | 1.00000 | 2.44551e-36 | 1.00000 |
| rad3           | 1.48817e-36 | 1.00000 | 1.48817e-36 | 1.00000 |
| rad25          | 1.29381e-36 | 1.00000 | 1.29381e-36 | 1.00000 |
| rad71          | 1.12266e-36 | 1.00000 | 1.12266e-36 | 1.00000 |
| rad4           | 7.56644e-37 | 1.00000 | 7.56644e-37 | 1.00000 |
| rad7           | 6.18117e-37 | 1.00000 | 6.18117e-37 | 1.00000 |
| rad27          | 2.78149e-37 | 1.00000 | 2.78149e-37 | 1.00000 |
| rad11          | 1.56068e-37 | 1.00000 | 1.56068e-37 | 1.00000 |
| rad9           | 1.60298e-38 | 1.00000 | 1.60298e-38 | 1.00000 |
| rad13          | 3.44189e-39 | 1.00000 | 3.44189e-39 | 1.00000 |
| rad5           | 6.31255e-40 | 1.00000 | 6.31255e-40 | 1.00000 |
| rad31          | 5.85926e-40 | 1.00000 | 5.85926e-40 | 1.00000 |
| rad33          | 2.67592e-41 | 1.00000 | 2.67592e-41 | 1.00000 |
| rad15          | 7.03337e-42 | 1.00000 | 7.03337e-42 | 1.00000 |
| rad20          | 1.85723e-43 | 1.00000 | 1.85723e-43 | 1.00000 |
| rad21          | 1.55080e-43 | 1.00000 | 1.55080e-43 | 1.00000 |
| rad19syn       | 2.10397e-44 | 1.00000 | 2.10397e-44 | 1.00000 |
| rad12          | 5.68164e-45 | 1.00000 | 5.68164e-45 | 1.00000 |
| rad18          | 1.34210e-45 | 1.00000 | 1.34210e-45 | 1.00000 |
| rad23          | 1.20466e-46 | 1.00000 | 1.20466e-46 | 1.00000 |
| rad22          | 4.96075e-48 | 1.00000 | 4.96075e-48 | 1.00000 |
| rad45          | 1.25111e-48 | 1.00000 | 1.25111e-48 | 1.00000 |
| rad24          | 6.32087e-49 | 1.00000 | 6.32087e-49 | 1.00000 |
| rad36          | 7.67146e-50 | 1.00000 | 7.67146e-50 | 1.00000 |
| rad8           | 5.76906e-66 | 1.00000 | 5.76906e-66 | 1.00000 |

0.100000000E-06 Pa, 140.000000 K

=====

| Rate constant             | True (fraction)        | Effective (fraction)   |
|---------------------------|------------------------|------------------------|
| Total                     | 4.99515e-15 (1.00 )    | 4.99515e-15 (1.00 )    |
| Formation of rad19        | 4.99514e-15 (1.000 )   | 4.99514e-15 (1.000 )   |
| H-abstraction to cyc2enyl | 5.62488e-21 (1.13e-06) | 5.62488e-21 (1.13e-06) |
| H-abstraction to cyclenyl | 3.00047e-26 (6.01e-12) | 3.00047e-26 (6.01e-12) |

| species                       | PYtrue      | Cumul    | PYeffective | Cumul    |
|-------------------------------|-------------|----------|-------------|----------|
| Indene+H                      | 0.999703    | 0.999703 | 0.999703    | 0.999703 |
| PhCHCCH2+H                    | 0.000280917 | 0.999984 | 0.000280917 | 0.999984 |
| PhCCH+CH3                     | 4.95294e-06 | 0.999989 | 4.95294e-06 | 0.999989 |
| C2H2+PhCH2                    | 3.71777e-06 | 0.999992 | 3.71777e-06 | 0.999992 |
| PhCCCH3+H                     | 2.86259e-06 | 0.999995 | 2.86259e-06 | 0.999995 |
| Ph+MeAc                       | 2.26007e-06 | 0.999998 | 2.26007e-06 | 0.999998 |
| Benzene+cycloprop-2-enylidene | 1.12607e-06 | 0.999999 | 1.12607e-06 | 0.999999 |
| rad67                         | 6.73023e-07 | 0.999999 | 6.73023e-07 | 0.999999 |
| rad35                         | 2.93770e-07 | 1.000000 | 2.93770e-07 | 1.000000 |
| Ph+Allene                     | 2.22660e-07 | 1.000000 | 2.22660e-07 | 1.000000 |
| PhCH2CCH+H                    | 2.93552e-08 | 1.000000 | 2.93552e-08 | 1.000000 |
| PAH7+H                        | 2.74321e-08 | 1.000000 | 2.74321e-08 | 1.000000 |
| rad39                         | 7.74205e-09 | 1.000000 | 7.74205e-09 | 1.000000 |

|                               |             |          |             |          |
|-------------------------------|-------------|----------|-------------|----------|
| rad37                         | 7.30375e-09 | 1.000000 | 7.30375e-09 | 1.000000 |
| rad30                         | 5.53888e-09 | 1.000000 | 5.53888e-09 | 1.000000 |
| PAH9+H                        | 3.99479e-10 | 1.000000 | 3.99479e-10 | 1.000000 |
| rad38                         | 1.75886e-10 | 1.000000 | 1.75886e-10 | 1.000000 |
| rad60syn                      | 2.76144e-11 | 1.000000 | 2.76144e-11 | 1.000000 |
| PAH10+CH3                     | 1.41941e-11 | 1.000000 | 1.41941e-11 | 1.000000 |
| rad60anti                     | 1.36504e-11 | 1.000000 | 1.36504e-11 | 1.000000 |
| PAH3+H                        | 1.30742e-11 | 1.000000 | 1.30742e-11 | 1.000000 |
| rad46                         | 1.09703e-11 | 1.000000 | 1.09703e-11 | 1.000000 |
| Benzene+cycloprop-1-enylidene | 6.00677e-12 | 1.000000 | 6.00677e-12 | 1.000000 |
| PhcycC3H3_A+H                 | 3.69543e-12 | 1.000000 | 3.69543e-12 | 1.000000 |
| rad59                         | 2.64125e-12 | 1.000000 | 2.64125e-12 | 1.000000 |
| rad43                         | 5.94445e-13 | 1.000000 | 5.94445e-13 | 1.000000 |
| rad54                         | 5.21921e-13 | 1.000000 | 5.21921e-13 | 1.000000 |
| rad62                         | 1.30794e-13 | 1.000000 | 1.30794e-13 | 1.000000 |
| rad50                         | 9.26897e-14 | 1.000000 | 9.26897e-14 | 1.000000 |
| Phenyl+cycC3H4                | 1.75978e-14 | 1.000000 | 0.00000     | 1.000000 |
| rad70                         | 1.06600e-14 | 1.000000 | 1.06600e-14 | 1.000000 |
| rad55                         | 4.71987e-15 | 1.000000 | 4.71987e-15 | 1.000000 |
| PAH1+H                        | 3.02080e-15 | 1.000000 | 3.02080e-15 | 1.000000 |
| PhcycC3H3_B+H                 | 1.95210e-15 | 1.000000 | 1.95210e-15 | 1.000000 |
| rad52                         | 7.09403e-16 | 1.000000 | 7.09403e-16 | 1.000000 |
| rad58                         | 2.89095e-16 | 1.000000 | 2.89095e-16 | 1.000000 |
| rad51                         | 2.17208e-16 | 1.000000 | 2.17208e-16 | 1.000000 |
| rad34                         | 1.62990e-16 | 1.000000 | 1.62990e-16 | 1.000000 |
| rad41                         | 2.94364e-17 | 1.000000 | 2.94364e-17 | 1.000000 |
| rad42                         | 2.32499e-17 | 1.000000 | 2.32499e-17 | 1.000000 |
| rad65                         | 4.78938e-18 | 1.000000 | 4.78938e-18 | 1.000000 |
| rad53                         | 2.52919e-20 | 1.000000 | 2.52919e-20 | 1.000000 |
| rad64                         | 2.62060e-21 | 1.000000 | 2.62060e-21 | 1.000000 |
| rad61                         | 3.06689e-23 | 1.000000 | 3.06689e-23 | 1.000000 |
| rad56                         | 6.80095e-25 | 1.000000 | 6.80095e-25 | 1.000000 |
| rad68syn                      | 4.60298e-26 | 1.000000 | 4.60298e-26 | 1.000000 |
| rad68anti                     | 3.68680e-26 | 1.000000 | 3.68680e-26 | 1.000000 |
| rad40syn                      | 7.53654e-30 | 1.000000 | 7.53654e-30 | 1.000000 |
| rad40anti                     | 5.95184e-30 | 1.000000 | 5.95184e-30 | 1.000000 |
| rad73                         | 5.47778e-31 | 1.000000 | 5.47778e-31 | 1.000000 |
| PAH8+H                        | 6.68141e-32 | 1.000000 | 6.68141e-32 | 1.000000 |
| rad6                          | 7.51709e-33 | 1.000000 | 7.51709e-33 | 1.000000 |
| rad47                         | 6.17129e-33 | 1.000000 | 6.17129e-33 | 1.000000 |
| rad26                         | 5.37297e-33 | 1.000000 | 5.37297e-33 | 1.000000 |
| rad28                         | 1.68910e-33 | 1.000000 | 1.68910e-33 | 1.000000 |
| rad2                          | 1.70986e-34 | 1.000000 | 1.70986e-34 | 1.000000 |
| rad19anti                     | 6.35581e-35 | 1.000000 | 6.35581e-35 | 1.000000 |
| rad71                         | 4.16930e-35 | 1.000000 | 4.16930e-35 | 1.000000 |
| rad1                          | 1.11587e-35 | 1.000000 | 1.11587e-35 | 1.000000 |
| rad10                         | 8.65566e-36 | 1.000000 | 8.65566e-36 | 1.000000 |
| rad14                         | 2.37801e-36 | 1.000000 | 2.37801e-36 | 1.000000 |
| rad3                          | 2.06680e-36 | 1.000000 | 2.06680e-36 | 1.000000 |
| rad25                         | 1.27952e-36 | 1.000000 | 1.27952e-36 | 1.000000 |
| rad4                          | 1.05209e-36 | 1.000000 | 1.05209e-36 | 1.000000 |
| rad7                          | 5.50793e-37 | 1.000000 | 5.50793e-37 | 1.000000 |
| rad27                         | 2.77570e-37 | 1.000000 | 2.77570e-37 | 1.000000 |
| rad11                         | 1.39618e-37 | 1.000000 | 1.39618e-37 | 1.000000 |
| rad9                          | 1.95441e-38 | 1.000000 | 1.95441e-38 | 1.000000 |
| rad13                         | 3.07071e-39 | 1.000000 | 3.07071e-39 | 1.000000 |
| rad31                         | 1.04782e-39 | 1.000000 | 1.04782e-39 | 1.000000 |
| rad5                          | 5.82873e-40 | 1.000000 | 5.82873e-40 | 1.000000 |
| rad33                         | 2.78483e-41 | 1.000000 | 2.78483e-41 | 1.000000 |
| rad15                         | 8.58475e-42 | 1.000000 | 8.58475e-42 | 1.000000 |
| rad20                         | 2.09759e-43 | 1.000000 | 2.09759e-43 | 1.000000 |
| rad21                         | 1.76533e-43 | 1.000000 | 1.76533e-43 | 1.000000 |
| rad19syn                      | 4.98180e-44 | 1.000000 | 4.98180e-44 | 1.000000 |
| rad12                         | 7.95552e-45 | 1.000000 | 7.95552e-45 | 1.000000 |
| rad18                         | 1.39678e-45 | 1.000000 | 1.39678e-45 | 1.000000 |
| rad23                         | 2.24867e-46 | 1.000000 | 2.24867e-46 | 1.000000 |
| rad22                         | 4.91847e-48 | 1.000000 | 4.91847e-48 | 1.000000 |
| rad45                         | 2.48548e-48 | 1.000000 | 2.48548e-48 | 1.000000 |
| rad24                         | 8.16920e-49 | 1.000000 | 8.16920e-49 | 1.000000 |
| rad36                         | 1.52546e-49 | 1.000000 | 1.52546e-49 | 1.000000 |
| rad8                          | 8.48093e-66 | 1.000000 | 8.48093e-66 | 1.000000 |

0.100000000E-06 Pa, 150.000000 K

=====

| Rate constant             | True (fraction)        | Effective (fraction)   |
|---------------------------|------------------------|------------------------|
| Total                     | 6.34137e-15 (1.00 )    | 6.34137e-15 (1.00 )    |
| Formation of rad19        | 6.34135e-15 (1.000 )   | 6.34135e-15 (1.000 )   |
| H-abstraction to cyc2enyl | 1.81685e-20 (2.87e-06) | 1.81685e-20 (2.87e-06) |
| H-abstraction to cyclenyl | 2.23765e-25 (3.53e-11) | 2.23765e-25 (3.53e-11) |

| species                       | PYtrue      | Cumul    | PYeffective | Cumul    |
|-------------------------------|-------------|----------|-------------|----------|
| Indene+H                      | 0.999692    | 0.999692 | 0.999692    | 0.999692 |
| PhCHCCH2+H                    | 0.000289592 | 0.999982 | 0.000289592 | 0.999982 |
| PhCCH+CH3                     | 5.11623e-06 | 0.999987 | 5.11623e-06 | 0.999987 |
| C2H2+PhCH2                    | 3.86834e-06 | 0.999991 | 3.86834e-06 | 0.999991 |
| PhCCCH3+H                     | 2.96768e-06 | 0.999994 | 2.96768e-06 | 0.999994 |
| Benzene+cycloprop-2-enylidene | 2.86508e-06 | 0.999997 | 2.86508e-06 | 0.999997 |
| Ph+MeAc                       | 2.36224e-06 | 0.999999 | 2.36224e-06 | 0.999999 |
| rad67                         | 7.01968e-07 | 1.000000 | 7.01968e-07 | 1.000000 |
| rad35                         | 3.05869e-07 | 1.000000 | 3.05869e-07 | 1.000000 |
| Ph+Allene                     | 2.36598e-07 | 1.000000 | 2.36598e-07 | 1.000000 |
| PhCH2CCH+H                    | 3.15146e-08 | 1.000000 | 3.15146e-08 | 1.000000 |
| PAH7+H                        | 2.88839e-08 | 1.000000 | 2.88839e-08 | 1.000000 |
| rad39                         | 8.15167e-09 | 1.000000 | 8.15167e-09 | 1.000000 |
| rad37                         | 7.71444e-09 | 1.000000 | 7.71444e-09 | 1.000000 |
| rad30                         | 5.77470e-09 | 1.000000 | 5.77470e-09 | 1.000000 |
| PAH9+H                        | 4.22009e-10 | 1.000000 | 4.22009e-10 | 1.000000 |
| rad38                         | 1.86919e-10 | 1.000000 | 1.86919e-10 | 1.000000 |
| Benzene+cycloprop-1-enylidene | 3.52865e-11 | 1.000000 | 3.52865e-11 | 1.000000 |
| rad60syn                      | 2.92988e-11 | 1.000000 | 2.92988e-11 | 1.000000 |
| PAH10+CH3                     | 1.59406e-11 | 1.000000 | 1.59406e-11 | 1.000000 |
| rad60anti                     | 1.45059e-11 | 1.000000 | 1.45059e-11 | 1.000000 |
| PAH3+H                        | 1.41866e-11 | 1.000000 | 1.41866e-11 | 1.000000 |
| rad46                         | 1.17105e-11 | 1.000000 | 1.17105e-11 | 1.000000 |
| PhcycC3H3_A+H                 | 4.70694e-12 | 1.000000 | 4.70694e-12 | 1.000000 |
| rad59                         | 2.85583e-12 | 1.000000 | 2.85583e-12 | 1.000000 |
| rad43                         | 6.57518e-13 | 1.000000 | 6.57518e-13 | 1.000000 |
| rad54                         | 5.85445e-13 | 1.000000 | 5.85445e-13 | 1.000000 |
| rad62                         | 1.45031e-13 | 1.000000 | 1.45031e-13 | 1.000000 |
| rad50                         | 1.02199e-13 | 1.000000 | 1.02199e-13 | 1.000000 |
| Phenyl+cycC3H4                | 2.61242e-14 | 1.000000 | 0.000000    | 1.000000 |
| rad70                         | 1.23994e-14 | 1.000000 | 1.23994e-14 | 1.000000 |
| rad55                         | 5.49294e-15 | 1.000000 | 5.49294e-15 | 1.000000 |
| PhcycC3H3_B+H                 | 4.08980e-15 | 1.000000 | 4.08980e-15 | 1.000000 |
| PAH1+H                        | 3.71111e-15 | 1.000000 | 3.71111e-15 | 1.000000 |
| rad52                         | 8.01987e-16 | 1.000000 | 8.01987e-16 | 1.000000 |
| rad58                         | 3.41821e-16 | 1.000000 | 3.41821e-16 | 1.000000 |
| rad51                         | 2.53178e-16 | 1.000000 | 2.53178e-16 | 1.000000 |
| rad34                         | 2.00908e-16 | 1.000000 | 2.00908e-16 | 1.000000 |
| rad41                         | 3.81683e-17 | 1.000000 | 3.81683e-17 | 1.000000 |
| rad42                         | 2.93833e-17 | 1.000000 | 2.93833e-17 | 1.000000 |
| rad65                         | 5.66165e-18 | 1.000000 | 5.66165e-18 | 1.000000 |
| rad53                         | 5.02100e-20 | 1.000000 | 5.02100e-20 | 1.000000 |
| rad64                         | 6.27506e-21 | 1.000000 | 6.27506e-21 | 1.000000 |
| rad61                         | 1.25963e-22 | 1.000000 | 1.25963e-22 | 1.000000 |
| rad56                         | 3.47179e-24 | 1.000000 | 3.47179e-24 | 1.000000 |
| rad68syn                      | 2.64356e-25 | 1.000000 | 2.64356e-25 | 1.000000 |
| rad68anti                     | 2.10658e-25 | 1.000000 | 2.10658e-25 | 1.000000 |
| rad40syn                      | 8.88016e-29 | 1.000000 | 8.88016e-29 | 1.000000 |
| rad40anti                     | 7.03998e-29 | 1.000000 | 7.03998e-29 | 1.000000 |
| rad73                         | 5.47735e-30 | 1.000000 | 5.47735e-30 | 1.000000 |
| PAH8+H                        | 1.26388e-30 | 1.000000 | 1.26388e-30 | 1.000000 |
| rad6                          | 6.93235e-33 | 1.000000 | 6.93235e-33 | 1.000000 |
| rad47                         | 6.13964e-33 | 1.000000 | 6.13964e-33 | 1.000000 |
| rad26                         | 4.93388e-33 | 1.000000 | 4.93388e-33 | 1.000000 |
| rad28                         | 1.52154e-33 | 1.000000 | 1.52154e-33 | 1.000000 |
| rad71                         | 9.41848e-34 | 1.000000 | 9.41848e-34 | 1.000000 |
| rad2                          | 2.47482e-34 | 1.000000 | 2.47482e-34 | 1.000000 |
| rad19anti                     | 1.44031e-34 | 1.000000 | 1.44031e-34 | 1.000000 |
| rad1                          | 1.62321e-35 | 1.000000 | 1.62321e-35 | 1.000000 |
| rad10                         | 1.25985e-35 | 1.000000 | 1.25985e-35 | 1.000000 |
| rad3                          | 3.00794e-36 | 1.000000 | 3.00794e-36 | 1.000000 |
| rad14                         | 2.33335e-36 | 1.000000 | 2.33335e-36 | 1.000000 |
| rad4                          | 1.53318e-36 | 1.000000 | 1.53318e-36 | 1.000000 |
| rad25                         | 1.27743e-36 | 1.000000 | 1.27743e-36 | 1.000000 |
| rad7                          | 5.08910e-37 | 1.000000 | 5.08910e-37 | 1.000000 |
| rad27                         | 2.79767e-37 | 1.000000 | 2.79767e-37 | 1.000000 |
| rad11                         | 1.29446e-37 | 1.000000 | 1.29446e-37 | 1.000000 |
| rad9                          | 2.44360e-38 | 1.000000 | 2.44360e-38 | 1.000000 |
| rad13                         | 2.84081e-39 | 1.000000 | 2.84081e-39 | 1.000000 |
| rad31                         | 1.96252e-39 | 1.000000 | 1.96252e-39 | 1.000000 |
| rad5                          | 5.42600e-40 | 1.000000 | 5.42600e-40 | 1.000000 |
| rad33                         | 2.96828e-41 | 1.000000 | 2.96828e-41 | 1.000000 |
| rad15                         | 1.07464e-41 | 1.000000 | 1.07464e-41 | 1.000000 |
| rad20                         | 2.40400e-43 | 1.000000 | 2.40400e-43 | 1.000000 |
| rad21                         | 2.04011e-43 | 1.000000 | 2.04011e-43 | 1.000000 |
| rad19syn                      | 1.23836e-43 | 1.000000 | 1.23836e-43 | 1.000000 |
| rad12                         | 1.14356e-44 | 1.000000 | 1.14356e-44 | 1.000000 |

|       |             |         |             |         |
|-------|-------------|---------|-------------|---------|
| rad18 | 1.46869e-45 | 1.00000 | 1.46869e-45 | 1.00000 |
| rad23 | 4.57424e-46 | 1.00000 | 4.57424e-46 | 1.00000 |
| rad45 | 5.46233e-48 | 1.00000 | 5.46233e-48 | 1.00000 |
| rad22 | 4.91926e-48 | 1.00000 | 4.91926e-48 | 1.00000 |
| rad24 | 1.07829e-48 | 1.00000 | 1.07829e-48 | 1.00000 |
| rad36 | 3.35645e-49 | 1.00000 | 3.35645e-49 | 1.00000 |
| rad8  | 1.27613e-65 | 1.00000 | 1.27613e-65 | 1.00000 |

0.100000000E-06 Pa, 160.000000 K

| Rate constant             | True (fraction)        | Effective (fraction)   |
|---------------------------|------------------------|------------------------|
| Total                     | 7.84423e-15 (1.00 )    | 7.84423e-15 (1.00 )    |
| Formation of rad19        | 7.84418e-15 (1.000 )   | 7.84418e-15 (1.000 )   |
| H-abstraction to cyc2enyl | 5.05321e-20 (6.44e-06) | 5.05321e-20 (6.44e-06) |
| H-abstraction to cyclenyl | 1.29479e-24 (1.65e-10) | 1.29479e-24 (1.65e-10) |

| species                       | PYtrue      | Cumul    | PYeffective | Cumul    |
|-------------------------------|-------------|----------|-------------|----------|
| Indene+H                      | 0.999679    | 0.999679 | 0.999679    | 0.999679 |
| PhCHCCH2+H                    | 0.000298982 | 0.999978 | 0.000298982 | 0.999978 |
| Benzene+cycloprop-2-enylidene | 6.44194e-06 | 0.999984 | 6.44194e-06 | 0.999984 |
| PhCCH+CH3                     | 5.29275e-06 | 0.999989 | 5.29275e-06 | 0.999989 |
| C2H2+PhCH2                    | 4.03297e-06 | 0.999993 | 4.03297e-06 | 0.999993 |
| PhCCCH3+H                     | 3.08198e-06 | 0.999996 | 3.08198e-06 | 0.999996 |
| Ph+MeAc                       | 2.47440e-06 | 0.999999 | 2.47440e-06 | 0.999999 |
| rad67                         | 7.33696e-07 | 1.000000 | 7.33696e-07 | 1.000000 |
| rad35                         | 3.19106e-07 | 1.000000 | 3.19106e-07 | 1.000000 |
| Ph+Allene                     | 2.52226e-07 | 1.000000 | 2.52226e-07 | 1.000000 |
| PhCH2CCH+H                    | 3.39643e-08 | 1.000000 | 3.39643e-08 | 1.000000 |
| PAH7+H                        | 3.04941e-08 | 1.000000 | 3.04941e-08 | 1.000000 |
| rad39                         | 8.60568e-09 | 1.000000 | 8.60568e-09 | 1.000000 |
| rad37                         | 8.17136e-09 | 1.000000 | 8.17136e-09 | 1.000000 |
| rad30                         | 6.03351e-09 | 1.000000 | 6.03351e-09 | 1.000000 |
| PAH9+H                        | 4.47144e-10 | 1.000000 | 4.47144e-10 | 1.000000 |
| rad38                         | 1.99330e-10 | 1.000000 | 1.99330e-10 | 1.000000 |
| Benzene+cycloprop-1-enylidene | 1.65062e-10 | 1.000000 | 1.65062e-10 | 1.000000 |
| rad60syn                      | 3.11859e-11 | 1.000000 | 3.11859e-11 | 1.000000 |
| PAH10+CH3                     | 1.80192e-11 | 1.000000 | 1.80192e-11 | 1.000000 |
| rad60anti                     | 1.54660e-11 | 1.000000 | 1.54660e-11 | 1.000000 |
| PAH3+H                        | 1.54653e-11 | 1.000000 | 1.54653e-11 | 1.000000 |
| rad46                         | 1.25466e-11 | 1.000000 | 1.25466e-11 | 1.000000 |
| PhcycC3H3_A+H                 | 6.04093e-12 | 1.000000 | 6.04093e-12 | 1.000000 |
| rad59                         | 3.10145e-12 | 1.000000 | 3.10145e-12 | 1.000000 |
| rad43                         | 7.31202e-13 | 1.000000 | 7.31202e-13 | 1.000000 |
| rad54                         | 6.61022e-13 | 1.000000 | 6.61022e-13 | 1.000000 |
| rad62                         | 1.61671e-13 | 1.000000 | 1.61671e-13 | 1.000000 |
| rad50                         | 1.13351e-13 | 1.000000 | 1.13351e-13 | 1.000000 |
| Phenyl+cycC3H4                | 3.86829e-14 | 1.000000 | 0.000000    | 1.000000 |
| rad70                         | 1.45456e-14 | 1.000000 | 1.45456e-14 | 1.000000 |
| PhcycC3H3_B+H                 | 8.12740e-15 | 1.000000 | 8.12740e-15 | 1.000000 |
| rad55                         | 6.44670e-15 | 1.000000 | 6.44670e-15 | 1.000000 |
| PAH1+H                        | 4.60690e-15 | 1.000000 | 4.60690e-15 | 1.000000 |
| rad52                         | 9.13581e-16 | 1.000000 | 9.13581e-16 | 1.000000 |
| rad58                         | 4.08006e-16 | 1.000000 | 4.08006e-16 | 1.000000 |
| rad51                         | 2.97957e-16 | 1.000000 | 2.97957e-16 | 1.000000 |
| rad34                         | 2.50279e-16 | 1.000000 | 2.50279e-16 | 1.000000 |
| rad41                         | 4.99159e-17 | 1.000000 | 4.99159e-17 | 1.000000 |
| rad42                         | 3.74399e-17 | 1.000000 | 3.74399e-17 | 1.000000 |
| rad65                         | 6.76165e-18 | 1.000000 | 6.76165e-18 | 1.000000 |
| rad53                         | 9.55513e-20 | 1.000000 | 9.55513e-20 | 1.000000 |
| rad64                         | 1.40204e-20 | 1.000000 | 1.40204e-20 | 1.000000 |
| rad61                         | 4.46330e-22 | 1.000000 | 4.46330e-22 | 1.000000 |
| rad56                         | 1.48090e-23 | 1.000000 | 1.48090e-23 | 1.000000 |
| rad68syn                      | 1.24419e-24 | 1.000000 | 1.24419e-24 | 1.000000 |
| rad68anti                     | 9.86157e-25 | 1.000000 | 9.86157e-25 | 1.000000 |
| rad40syn                      | 7.79816e-28 | 1.000000 | 7.79816e-28 | 1.000000 |
| rad40anti                     | 6.20621e-28 | 1.000000 | 6.20621e-28 | 1.000000 |
| rad73                         | 4.23082e-29 | 1.000000 | 4.23082e-29 | 1.000000 |
| PAH8+H                        | 1.68146e-29 | 1.000000 | 1.68146e-29 | 1.000000 |
| rad71                         | 1.46142e-32 | 1.000000 | 1.46142e-32 | 1.000000 |
| rad6                          | 6.69922e-33 | 1.000000 | 6.69922e-33 | 1.000000 |
| rad47                         | 6.18322e-33 | 1.000000 | 6.18322e-33 | 1.000000 |
| rad26                         | 4.55923e-33 | 1.000000 | 4.55923e-33 | 1.000000 |
| rad28                         | 1.38047e-33 | 1.000000 | 1.38047e-33 | 1.000000 |
| rad2                          | 3.81178e-34 | 1.000000 | 3.81178e-34 | 1.000000 |
| rad19anti                     | 3.44720e-34 | 1.000000 | 3.44720e-34 | 1.000000 |
| rad1                          | 2.51378e-35 | 1.000000 | 2.51378e-35 | 1.000000 |
| rad10                         | 1.91903e-35 | 1.000000 | 1.91903e-35 | 1.000000 |
| rad3                          | 4.24536e-36 | 1.000000 | 4.24536e-36 | 1.000000 |



|          |             |         |             |         |
|----------|-------------|---------|-------------|---------|
| rad14    | 2.30810e-36 | 1.00000 | 2.30810e-36 | 1.00000 |
| rad4     | 2.16702e-36 | 1.00000 | 2.16702e-36 | 1.00000 |
| rad25    | 1.28627e-36 | 1.00000 | 1.28627e-36 | 1.00000 |
| rad7     | 4.92755e-37 | 1.00000 | 4.92755e-37 | 1.00000 |
| rad27    | 2.84540e-37 | 1.00000 | 2.84540e-37 | 1.00000 |
| rad11    | 1.25626e-37 | 1.00000 | 1.25626e-37 | 1.00000 |
| rad9     | 3.12851e-38 | 1.00000 | 3.12851e-38 | 1.00000 |
| rad31    | 3.84757e-39 | 1.00000 | 3.84757e-39 | 1.00000 |
| rad13    | 2.75428e-39 | 1.00000 | 2.75428e-39 | 1.00000 |
| rad5     | 5.08591e-40 | 1.00000 | 5.08591e-40 | 1.00000 |
| rad33    | 3.23560e-41 | 1.00000 | 3.23560e-41 | 1.00000 |
| rad15    | 1.37762e-41 | 1.00000 | 1.37762e-41 | 1.00000 |
| rad19syn | 3.23538e-43 | 1.00000 | 3.23538e-43 | 1.00000 |
| rad20    | 2.79327e-43 | 1.00000 | 2.79327e-43 | 1.00000 |
| rad21    | 2.39139e-43 | 1.00000 | 2.39139e-43 | 1.00000 |
| rad12    | 1.68628e-44 | 1.00000 | 1.68628e-44 | 1.00000 |
| rad18    | 1.55859e-45 | 1.00000 | 1.55859e-45 | 1.00000 |
| rad23    | 1.01379e-45 | 1.00000 | 1.01379e-45 | 1.00000 |
| rad45    | 1.26799e-47 | 1.00000 | 1.26799e-47 | 1.00000 |
| rad22    | 4.96067e-48 | 1.00000 | 4.96067e-48 | 1.00000 |
| rad24    | 1.45245e-48 | 1.00000 | 1.45245e-48 | 1.00000 |
| rad36    | 7.80277e-49 | 1.00000 | 7.80277e-49 | 1.00000 |
| rad8     | 1.96346e-65 | 1.00000 | 1.96346e-65 | 1.00000 |

0.100000000E-06 Pa, 170.000000 K

| Rate constant             | True (fraction)        | Effective (fraction)   |
|---------------------------|------------------------|------------------------|
| Total                     | 9.49598e-15 (1.00 )    | 9.49598e-15 (1.00 )    |
| Formation of rad19        | 9.49586e-15 (1.000 )   | 9.49586e-15 (1.000 )   |
| H-abstraction to cyc2enyl | 1.24279e-19 (1.31e-05) | 1.24279e-19 (1.31e-05) |
| H-abstraction to cyclenyl | 6.08025e-24 (6.40e-10) | 6.08025e-24 (6.40e-10) |

| species                       | PYtrue      | Cumul    | PYeffective | Cumul    |
|-------------------------------|-------------|----------|-------------|----------|
| Indene+H                      | 0.999661    | 0.999661 | 0.999661    | 0.999661 |
| PhCHCCH2+H                    | 0.000309167 | 0.999970 | 0.000309167 | 0.999970 |
| Benzene+cycloprop-2-enylidene | 1.30875e-05 | 0.999983 | 1.30875e-05 | 0.999983 |
| PhCCH+CH3                     | 5.48398e-06 | 0.999989 | 5.48398e-06 | 0.999989 |
| C2H2+PhCH2                    | 4.21347e-06 | 0.999993 | 4.21347e-06 | 0.999993 |
| PhCCCH3+H                     | 3.20659e-06 | 0.999996 | 3.20659e-06 | 0.999996 |
| Ph+MeAc                       | 2.59788e-06 | 0.999999 | 2.59788e-06 | 0.999999 |
| rad67                         | 7.68575e-07 | 0.999999 | 7.68575e-07 | 0.999999 |
| rad35                         | 3.33631e-07 | 1.000000 | 3.33631e-07 | 1.000000 |
| Ph+Allene                     | 2.69815e-07 | 1.000000 | 2.69815e-07 | 1.000000 |
| PhCH2CCH+H                    | 3.67554e-08 | 1.000000 | 3.67554e-08 | 1.000000 |
| PAH7+H                        | 3.22859e-08 | 1.000000 | 3.22859e-08 | 1.000000 |
| rad39                         | 9.11054e-09 | 1.000000 | 9.11054e-09 | 1.000000 |
| rad37                         | 8.68151e-09 | 1.000000 | 8.68151e-09 | 1.000000 |
| rad30                         | 6.31840e-09 | 1.000000 | 6.31840e-09 | 1.000000 |
| Benzene+cycloprop-1-enylidene | 6.40297e-10 | 1.000000 | 6.40297e-10 | 1.000000 |
| PAH9+H                        | 4.75294e-10 | 1.000000 | 4.75294e-10 | 1.000000 |
| rad38                         | 2.13351e-10 | 1.000000 | 2.13351e-10 | 1.000000 |
| rad60syn                      | 3.33085e-11 | 1.000000 | 3.33085e-11 | 1.000000 |
| PAH10+CH3                     | 2.05094e-11 | 1.000000 | 2.05094e-11 | 1.000000 |
| PAH3+H                        | 1.69431e-11 | 1.000000 | 1.69431e-11 | 1.000000 |
| rad60anti                     | 1.65480e-11 | 1.000000 | 1.65480e-11 | 1.000000 |
| rad46                         | 1.34952e-11 | 1.000000 | 1.34952e-11 | 1.000000 |
| PhcycC3H3_A+H                 | 7.80973e-12 | 1.000000 | 7.80973e-12 | 1.000000 |
| rad59                         | 3.38400e-12 | 1.000000 | 3.38400e-12 | 1.000000 |
| rad43                         | 8.17741e-13 | 1.000000 | 8.17741e-13 | 1.000000 |
| rad54                         | 7.51515e-13 | 1.000000 | 7.51515e-13 | 1.000000 |
| rad62                         | 1.81221e-13 | 1.000000 | 1.81221e-13 | 1.000000 |
| rad50                         | 1.26512e-13 | 1.000000 | 1.26512e-13 | 1.000000 |
| Phenyl+cycC3H4                | 5.71891e-14 | 1.000000 | 0.000000    | 1.000000 |
| rad70                         | 1.72142e-14 | 1.000000 | 1.72142e-14 | 1.000000 |
| PhcycC3H3_B+H                 | 1.54798e-14 | 1.000000 | 1.54798e-14 | 1.000000 |
| rad55                         | 7.63216e-15 | 1.000000 | 7.63216e-15 | 1.000000 |
| PAH1+H                        | 5.77897e-15 | 1.000000 | 5.77897e-15 | 1.000000 |
| rad52                         | 1.04914e-15 | 1.000000 | 1.04914e-15 | 1.000000 |
| rad58                         | 4.91782e-16 | 1.000000 | 4.91782e-16 | 1.000000 |
| rad51                         | 3.54209e-16 | 1.000000 | 3.54209e-16 | 1.000000 |
| rad34                         | 3.15103e-16 | 1.000000 | 3.15103e-16 | 1.000000 |
| rad41                         | 6.58203e-17 | 1.000000 | 6.58203e-17 | 1.000000 |
| rad42                         | 4.80841e-17 | 1.000000 | 4.80841e-17 | 1.000000 |
| rad65                         | 8.16178e-18 | 1.000000 | 8.16178e-18 | 1.000000 |
| rad53                         | 1.76036e-19 | 1.000000 | 1.76036e-19 | 1.000000 |
| rad64                         | 2.96517e-20 | 1.000000 | 2.96517e-20 | 1.000000 |
| rad61                         | 1.40406e-21 | 1.000000 | 1.40406e-21 | 1.000000 |
| rad56                         | 5.46521e-23 | 1.000000 | 5.46521e-23 | 1.000000 |

|           |             |         |             |         |
|-----------|-------------|---------|-------------|---------|
| rad68syn  | 4.98617e-24 | 1.00000 | 4.98617e-24 | 1.00000 |
| rad68anti | 3.92935e-24 | 1.00000 | 3.92935e-24 | 1.00000 |
| rad40syn  | 5.38958e-27 | 1.00000 | 5.38958e-27 | 1.00000 |
| rad40anti | 4.30388e-27 | 1.00000 | 4.30388e-27 | 1.00000 |
| rad73     | 2.64778e-28 | 1.00000 | 2.64778e-28 | 1.00000 |
| PAH8+H    | 1.67789e-28 | 1.00000 | 1.67789e-28 | 1.00000 |
| rad71     | 1.66935e-31 | 1.00000 | 1.66935e-31 | 1.00000 |
| rad6      | 6.89380e-33 | 1.00000 | 6.89380e-33 | 1.00000 |
| rad47     | 6.30329e-33 | 1.00000 | 6.30329e-33 | 1.00000 |
| rad26     | 4.23638e-33 | 1.00000 | 4.23638e-33 | 1.00000 |
| rad28     | 1.26034e-33 | 1.00000 | 1.26034e-33 | 1.00000 |
| rad19anti | 8.69987e-34 | 1.00000 | 8.69987e-34 | 1.00000 |
| rad2      | 5.73417e-34 | 1.00000 | 5.73417e-34 | 1.00000 |
| rad1      | 3.80409e-35 | 1.00000 | 3.80409e-35 | 1.00000 |
| rad10     | 2.98968e-35 | 1.00000 | 2.98968e-35 | 1.00000 |
| rad3      | 6.69637e-36 | 1.00000 | 6.69637e-36 | 1.00000 |
| rad4      | 3.42351e-36 | 1.00000 | 3.42351e-36 | 1.00000 |
| rad14     | 2.29986e-36 | 1.00000 | 2.29986e-36 | 1.00000 |
| rad25     | 1.30529e-36 | 1.00000 | 1.30529e-36 | 1.00000 |
| rad7      | 5.08083e-37 | 1.00000 | 5.08083e-37 | 1.00000 |
| rad27     | 2.91800e-37 | 1.00000 | 2.91800e-37 | 1.00000 |
| rad11     | 1.29579e-37 | 1.00000 | 1.29579e-37 | 1.00000 |
| rad9      | 4.09710e-38 | 1.00000 | 4.09710e-38 | 1.00000 |
| rad31     | 7.89254e-39 | 1.00000 | 7.89254e-39 | 1.00000 |
| rad13     | 2.84386e-39 | 1.00000 | 2.84386e-39 | 1.00000 |
| rad5      | 4.79501e-40 | 1.00000 | 4.79501e-40 | 1.00000 |
| rad33     | 3.60505e-41 | 1.00000 | 3.60505e-41 | 1.00000 |
| rad15     | 1.80667e-41 | 1.00000 | 1.80667e-41 | 1.00000 |
| rad19syn  | 8.89196e-43 | 1.00000 | 8.89196e-43 | 1.00000 |
| rad20     | 3.28820e-43 | 1.00000 | 3.28820e-43 | 1.00000 |
| rad21     | 2.84137e-43 | 1.00000 | 2.84137e-43 | 1.00000 |
| rad12     | 2.54981e-44 | 1.00000 | 2.54981e-44 | 1.00000 |
| rad23     | 2.45235e-45 | 1.00000 | 2.45235e-45 | 1.00000 |
| rad18     | 1.66793e-45 | 1.00000 | 1.66793e-45 | 1.00000 |
| rad45     | 3.26315e-47 | 1.00000 | 3.26315e-47 | 1.00000 |
| rad22     | 5.04670e-48 | 1.00000 | 5.04670e-48 | 1.00000 |
| rad36     | 2.01153e-48 | 1.00000 | 2.01153e-48 | 1.00000 |
| rad24     | 1.99558e-48 | 1.00000 | 1.99558e-48 | 1.00000 |
| rad8      | 3.08693e-65 | 1.00000 | 3.08693e-65 | 1.00000 |

0.100000000E-06 Pa, 180.000000 K

| Rate constant             | True (fraction)        | Effective (fraction)   |
|---------------------------|------------------------|------------------------|
| Total                     | 1.12884e-14 (1.00 )    | 1.12884e-14 (1.00 )    |
| Formation of rad19        | 1.12881e-14 (1.000 )   | 1.12881e-14 (1.000 )   |
| H-abstraction to cyc2enyl | 2.75916e-19 (2.44e-05) | 2.75916e-19 (2.44e-05) |
| H-abstraction to cyclenyl | 2.39955e-23 (2.13e-09) | 2.39955e-23 (2.13e-09) |

| species                       | PYtrue      | Cumul    | PYeffective | Cumul    |
|-------------------------------|-------------|----------|-------------|----------|
| Indene+H                      | 0.999638    | 0.999638 | 0.999638    | 0.999638 |
| PhCHCCH2+H                    | 0.000320239 | 0.999958 | 0.000320239 | 0.999958 |
| Benzene+cycloprop-2-enylidene | 2.44424e-05 | 0.999982 | 2.44424e-05 | 0.999982 |
| PhCCH+CH3                     | 5.69151e-06 | 0.999988 | 5.69151e-06 | 0.999988 |
| C2H2+PhCH2                    | 4.41182e-06 | 0.999992 | 4.41182e-06 | 0.999992 |
| PhCCCH3+H                     | 3.34271e-06 | 0.999996 | 3.34271e-06 | 0.999996 |
| Ph+MeAc                       | 2.73412e-06 | 0.999998 | 2.73412e-06 | 0.999998 |
| rad67                         | 8.07010e-07 | 0.999999 | 8.07010e-07 | 0.999999 |
| rad35                         | 3.49603e-07 | 1.000000 | 3.49603e-07 | 1.000000 |
| Ph+Allene                     | 2.89684e-07 | 1.000000 | 2.89684e-07 | 1.000000 |
| PhCH2CCH+H                    | 3.99486e-08 | 1.000000 | 3.99486e-08 | 1.000000 |
| PAH7+H                        | 3.42855e-08 | 1.000000 | 3.42855e-08 | 1.000000 |
| rad39                         | 9.67359e-09 | 1.000000 | 9.67359e-09 | 1.000000 |
| rad37                         | 9.25289e-09 | 1.000000 | 9.25289e-09 | 1.000000 |
| rad30                         | 6.63280e-09 | 1.000000 | 6.63280e-09 | 1.000000 |
| Benzene+cycloprop-1-enylidene | 2.12567e-09 | 1.000000 | 2.12567e-09 | 1.000000 |
| PAH9+H                        | 5.06928e-10 | 1.000000 | 5.06928e-10 | 1.000000 |
| rad38                         | 2.29255e-10 | 1.000000 | 2.29255e-10 | 1.000000 |
| rad60syn                      | 3.57046e-11 | 1.000000 | 3.57046e-11 | 1.000000 |
| PAH10+CH3                     | 2.35102e-11 | 1.000000 | 2.35102e-11 | 1.000000 |
| PAH3+H                        | 1.86591e-11 | 1.000000 | 1.86591e-11 | 1.000000 |
| rad60anti                     | 1.77718e-11 | 1.000000 | 1.77718e-11 | 1.000000 |
| rad46                         | 1.45760e-11 | 1.000000 | 1.45760e-11 | 1.000000 |
| PhcycC3H3_A+H                 | 1.01655e-11 | 1.000000 | 1.01655e-11 | 1.000000 |
| rad59                         | 3.71052e-12 | 1.000000 | 3.71052e-12 | 1.000000 |
| rad43                         | 9.19879e-13 | 1.000000 | 9.19879e-13 | 1.000000 |
| rad54                         | 8.60523e-13 | 1.000000 | 8.60523e-13 | 1.000000 |
| rad62                         | 2.04292e-13 | 1.000000 | 2.04292e-13 | 1.000000 |
| rad50                         | 1.42141e-13 | 1.000000 | 1.42141e-13 | 1.000000 |

|                |             |          |             |          |
|----------------|-------------|----------|-------------|----------|
| Phenyl+cycC3H4 | 8.44565e-14 | 1.000000 | 0.00000     | 1.000000 |
| PhcycC3H3_B+H  | 2.84776e-14 | 1.000000 | 2.84776e-14 | 1.000000 |
| rad70          | 2.05555e-14 | 1.000000 | 2.05555e-14 | 1.000000 |
| rad55          | 9.11579e-15 | 1.000000 | 9.11579e-15 | 1.000000 |
| PAH1+H         | 7.32394e-15 | 1.000000 | 7.32394e-15 | 1.000000 |
| rad52          | 1.21498e-15 | 1.000000 | 1.21498e-15 | 1.000000 |
| rad58          | 5.98636e-16 | 1.000000 | 5.98636e-16 | 1.000000 |
| rad51          | 4.25485e-16 | 1.000000 | 4.25485e-16 | 1.000000 |
| rad34          | 4.00857e-16 | 1.000000 | 4.00857e-16 | 1.000000 |
| rad41          | 8.74643e-17 | 1.000000 | 8.74643e-17 | 1.000000 |
| rad42          | 6.22157e-17 | 1.000000 | 6.22157e-17 | 1.000000 |
| rad65          | 9.95949e-18 | 1.000000 | 9.95949e-18 | 1.000000 |
| rad53          | 3.16150e-19 | 1.000000 | 3.16150e-19 | 1.000000 |
| rad64          | 5.99926e-20 | 1.000000 | 5.99926e-20 | 1.000000 |
| rad61          | 4.00801e-21 | 1.000000 | 4.00801e-21 | 1.000000 |
| rad56          | 1.79227e-22 | 1.000000 | 1.79227e-22 | 1.000000 |
| rad68syn       | 1.75240e-23 | 1.000000 | 1.75240e-23 | 1.000000 |
| rad68anti      | 1.37247e-23 | 1.000000 | 1.37247e-23 | 1.000000 |
| rad40syn       | 3.05803e-26 | 1.000000 | 3.05803e-26 | 1.000000 |
| rad40anti      | 2.44831e-26 | 1.000000 | 2.44831e-26 | 1.000000 |
| rad73          | 1.39313e-27 | 1.000000 | 1.39313e-27 | 1.000000 |
| PAH8+H         | 1.32188e-27 | 1.000000 | 1.32188e-27 | 1.000000 |
| rad71          | 1.48898e-30 | 1.000000 | 1.48898e-30 | 1.000000 |
| rad6           | 7.71921e-33 | 1.000000 | 7.71921e-33 | 1.000000 |
| rad47          | 6.50507e-33 | 1.000000 | 6.50507e-33 | 1.000000 |
| rad26          | 3.95628e-33 | 1.000000 | 3.95628e-33 | 1.000000 |
| rad19anti      | 2.31119e-33 | 1.000000 | 2.31119e-33 | 1.000000 |
| rad28          | 1.15719e-33 | 1.000000 | 1.15719e-33 | 1.000000 |
| rad2           | 1.01261e-33 | 1.000000 | 1.01261e-33 | 1.000000 |
| rad1           | 6.76130e-35 | 1.000000 | 6.76130e-35 | 1.000000 |
| rad10          | 5.01317e-35 | 1.000000 | 5.01317e-35 | 1.000000 |
| rad3           | 1.06630e-35 | 1.000000 | 1.06630e-35 | 1.000000 |
| rad4           | 5.46092e-36 | 1.000000 | 5.46092e-36 | 1.000000 |
| rad14          | 2.30705e-36 | 1.000000 | 2.30705e-36 | 1.000000 |
| rad25          | 1.33416e-36 | 1.000000 | 1.33416e-36 | 1.000000 |
| rad7           | 5.70089e-37 | 1.000000 | 5.70089e-37 | 1.000000 |
| rad27          | 3.01559e-37 | 1.000000 | 3.01559e-37 | 1.000000 |
| rad11          | 1.45047e-37 | 1.000000 | 1.45047e-37 | 1.000000 |
| rad9           | 5.48442e-38 | 1.000000 | 5.48442e-38 | 1.000000 |
| rad31          | 1.69327e-38 | 1.000000 | 1.69327e-38 | 1.000000 |
| rad13          | 3.19538e-39 | 1.000000 | 3.19538e-39 | 1.000000 |
| rad5           | 4.54334e-40 | 1.000000 | 4.54334e-40 | 1.000000 |
| rad33          | 4.10905e-41 | 1.000000 | 4.10905e-41 | 1.000000 |
| rad15          | 2.42207e-41 | 1.000000 | 2.42207e-41 | 1.000000 |
| rad19syn       | 2.57212e-42 | 1.000000 | 2.57212e-42 | 1.000000 |
| rad20          | 3.91969e-43 | 1.000000 | 3.91969e-43 | 1.000000 |
| rad21          | 3.42041e-43 | 1.000000 | 3.42041e-43 | 1.000000 |
| rad12          | 3.95290e-44 | 1.000000 | 3.95290e-44 | 1.000000 |
| rad23          | 6.48883e-45 | 1.000000 | 6.48883e-45 | 1.000000 |
| rad18          | 1.79878e-45 | 1.000000 | 1.79878e-45 | 1.000000 |
| rad45          | 9.24294e-47 | 1.000000 | 9.24294e-47 | 1.000000 |
| rad36          | 5.70957e-48 | 1.000000 | 5.70957e-48 | 1.000000 |
| rad22          | 5.19571e-48 | 1.000000 | 5.19571e-48 | 1.000000 |
| rad24          | 2.79583e-48 | 1.000000 | 2.79583e-48 | 1.000000 |
| rad8           | 4.95693e-65 | 1.000000 | 4.95693e-65 | 1.000000 |

0.100000000E-06 Pa, 190.000000 K

=====

| Rate constant             | True (fraction)        | Effective (fraction)   |
|---------------------------|------------------------|------------------------|
| Total                     | 1.32132e-14 (1.00 )    | 1.32132e-14 (1.00 )    |
| Formation of rad19        | 1.32126e-14 (1.000 )   | 1.32126e-14 (1.000 )   |
| H-abstraction to cyc2enyl | 5.62053e-19 (4.25e-05) | 5.62053e-19 (4.25e-05) |
| H-abstraction to cyclenyl | 8.18073e-23 (6.19e-09) | 8.18073e-23 (6.19e-09) |

| species                       | PYtrue      | Cumul    | PYeffective | Cumul    |
|-------------------------------|-------------|----------|-------------|----------|
| Indene+H                      | 0.999606    | 0.999606 | 0.999606    | 0.999606 |
| PhCHCCH2+H                    | 0.000332293 | 0.999939 | 0.000332293 | 0.999939 |
| Benzene+cycloprop-2-enylidene | 4.25373e-05 | 0.999981 | 4.25373e-05 | 0.999981 |
| PhCCH+CH3                     | 5.91707e-06 | 0.999987 | 5.91707e-06 | 0.999987 |
| C2H2+PhCH2                    | 4.63023e-06 | 0.999992 | 4.63023e-06 | 0.999992 |
| PhCCCH3+H                     | 3.49167e-06 | 0.999995 | 3.49167e-06 | 0.999995 |
| Ph+MeAc                       | 2.88479e-06 | 0.999998 | 2.88479e-06 | 0.999998 |
| rad67                         | 8.49457e-07 | 0.999999 | 8.49457e-07 | 0.999999 |
| rad35                         | 3.67207e-07 | 0.999999 | 3.67207e-07 | 0.999999 |
| Ph+Allene                     | 3.12197e-07 | 1.000000 | 3.12197e-07 | 1.000000 |
| PhCH2CCH+H                    | 4.36151e-08 | 1.000000 | 4.36151e-08 | 1.000000 |
| PAH7+H                        | 3.65230e-08 | 1.000000 | 3.65230e-08 | 1.000000 |
| rad39                         | 1.03032e-08 | 1.000000 | 1.03032e-08 | 1.000000 |

|                               |             |          |             |          |
|-------------------------------|-------------|----------|-------------|----------|
| rad37                         | 9.89464e-09 | 1.000000 | 9.89464e-09 | 1.000000 |
| rad30                         | 6.98058e-09 | 1.000000 | 6.98058e-09 | 1.000000 |
| Benzene+cycloprop-1-enylidene | 6.19133e-09 | 1.000000 | 6.19133e-09 | 1.000000 |
| PAH9+H                        | 5.42590e-10 | 1.000000 | 5.42590e-10 | 1.000000 |
| rad38                         | 2.47359e-10 | 1.000000 | 2.47359e-10 | 1.000000 |
| rad60syn                      | 3.84183e-11 | 1.000000 | 3.84183e-11 | 1.000000 |
| PAH10+CH3                     | 2.71459e-11 | 1.000000 | 2.71459e-11 | 1.000000 |
| PAH3+H                        | 2.06610e-11 | 1.000000 | 2.06610e-11 | 1.000000 |
| rad60anti                     | 1.91607e-11 | 1.000000 | 1.91607e-11 | 1.000000 |
| rad46                         | 1.58119e-11 | 1.000000 | 1.58119e-11 | 1.000000 |
| PhcycC3H3_A+H                 | 1.33135e-11 | 1.000000 | 1.33135e-11 | 1.000000 |
| rad59                         | 4.08946e-12 | 1.000000 | 4.08946e-12 | 1.000000 |
| rad43                         | 1.04096e-12 | 1.000000 | 1.04096e-12 | 1.000000 |
| rad54                         | 9.92552e-13 | 1.000000 | 9.92552e-13 | 1.000000 |
| rad62                         | 2.31631e-13 | 1.000000 | 2.31631e-13 | 1.000000 |
| rad50                         | 1.60801e-13 | 1.000000 | 1.60801e-13 | 1.000000 |
| Phenyl+cycC3H4                | 1.24603e-13 | 1.000000 | 0.00000     | 1.000000 |
| PhcycC3H3_B+H                 | 5.08976e-14 | 1.000000 | 5.08976e-14 | 1.000000 |
| rad70                         | 2.47658e-14 | 1.000000 | 2.47658e-14 | 1.000000 |
| rad55                         | 1.09840e-14 | 1.000000 | 1.09840e-14 | 1.000000 |
| PAH1+H                        | 9.37357e-15 | 1.000000 | 9.37357e-15 | 1.000000 |
| rad52                         | 1.41930e-15 | 1.000000 | 1.41930e-15 | 1.000000 |
| rad58                         | 7.35874e-16 | 1.000000 | 7.35874e-16 | 1.000000 |
| rad51                         | 5.16512e-16 | 1.000000 | 5.16512e-16 | 1.000000 |
| rad34                         | 5.15049e-16 | 1.000000 | 5.15049e-16 | 1.000000 |
| rad41                         | 1.17041e-16 | 1.000000 | 1.17041e-16 | 1.000000 |
| rad42                         | 8.10502e-17 | 1.000000 | 8.10502e-17 | 1.000000 |
| rad65                         | 1.22862e-17 | 1.000000 | 1.22862e-17 | 1.000000 |
| rad53                         | 5.56219e-19 | 1.000000 | 5.56219e-19 | 1.000000 |
| rad64                         | 1.17042e-19 | 1.000000 | 1.17042e-19 | 1.000000 |
| rad61                         | 1.05588e-20 | 1.000000 | 1.05588e-20 | 1.000000 |
| rad56                         | 5.33231e-22 | 1.000000 | 5.33231e-22 | 1.000000 |
| rad68syn                      | 5.52671e-23 | 1.000000 | 5.52671e-23 | 1.000000 |
| rad68anti                     | 4.30019e-23 | 1.000000 | 4.30019e-23 | 1.000000 |
| rad40syn                      | 1.47212e-25 | 1.000000 | 1.47212e-25 | 1.000000 |
| rad40anti                     | 1.18054e-25 | 1.000000 | 1.18054e-25 | 1.000000 |
| PAH8+H                        | 8.53886e-27 | 1.000000 | 8.53886e-27 | 1.000000 |
| rad73                         | 6.34253e-27 | 1.000000 | 6.34253e-27 | 1.000000 |
| rad71                         | 1.07847e-29 | 1.000000 | 1.07847e-29 | 1.000000 |
| rad6                          | 9.61519e-33 | 1.000000 | 9.61519e-33 | 1.000000 |
| rad47                         | 6.79798e-33 | 1.000000 | 6.79798e-33 | 1.000000 |
| rad19anti                     | 6.45010e-33 | 1.000000 | 6.45010e-33 | 1.000000 |
| rad26                         | 3.71276e-33 | 1.000000 | 3.71276e-33 | 1.000000 |
| rad2                          | 1.67646e-33 | 1.000000 | 1.67646e-33 | 1.000000 |
| rad28                         | 1.06830e-33 | 1.000000 | 1.06830e-33 | 1.000000 |
| rad1                          | 1.12728e-34 | 1.000000 | 1.12728e-34 | 1.000000 |
| rad10                         | 8.59506e-35 | 1.000000 | 8.59506e-35 | 1.000000 |
| rad3                          | 1.72408e-35 | 1.000000 | 1.72408e-35 | 1.000000 |
| rad4                          | 8.84641e-36 | 1.000000 | 8.84641e-36 | 1.000000 |
| rad14                         | 2.32871e-36 | 1.000000 | 2.32871e-36 | 1.000000 |
| rad25                         | 1.37286e-36 | 1.000000 | 1.37286e-36 | 1.000000 |
| rad7                          | 7.11609e-37 | 1.000000 | 7.11609e-37 | 1.000000 |
| rad27                         | 3.13909e-37 | 1.000000 | 3.13909e-37 | 1.000000 |
| rad11                         | 1.80114e-37 | 1.000000 | 1.80114e-37 | 1.000000 |
| rad9                          | 7.50054e-38 | 1.000000 | 7.50054e-38 | 1.000000 |
| rad31                         | 3.79749e-38 | 1.000000 | 3.79749e-38 | 1.000000 |
| rad13                         | 3.99425e-39 | 1.000000 | 3.99425e-39 | 1.000000 |
| rad5                          | 4.32336e-40 | 1.000000 | 4.32336e-40 | 1.000000 |
| rad33                         | 4.80419e-41 | 1.000000 | 4.80419e-41 | 1.000000 |
| rad15                         | 3.31782e-41 | 1.000000 | 3.31782e-41 | 1.000000 |
| rad19syn                      | 7.83212e-42 | 1.000000 | 7.83212e-42 | 1.000000 |
| rad20                         | 4.72984e-43 | 1.000000 | 4.72984e-43 | 1.000000 |
| rad21                         | 4.17026e-43 | 1.000000 | 4.17026e-43 | 1.000000 |
| rad12                         | 6.28294e-44 | 1.000000 | 6.28294e-44 | 1.000000 |
| rad23                         | 1.87978e-44 | 1.000000 | 1.87978e-44 | 1.000000 |
| rad18                         | 1.95390e-45 | 1.000000 | 1.95390e-45 | 1.000000 |
| rad45                         | 2.88234e-46 | 1.000000 | 2.88234e-46 | 1.000000 |
| rad36                         | 1.78481e-47 | 1.000000 | 1.78481e-47 | 1.000000 |
| rad22                         | 5.46593e-48 | 1.000000 | 5.46593e-48 | 1.000000 |
| rad24                         | 3.99375e-48 | 1.000000 | 3.99375e-48 | 1.000000 |
| rad8                          | 8.12778e-65 | 1.000000 | 8.12778e-65 | 1.000000 |

0.100000000E-06 Pa, 200.000000 K

| Rate constant             | True (fraction)        | Effective (fraction)   |
|---------------------------|------------------------|------------------------|
| Total                     | 1.52621e-14 (1.00 )    | 1.52621e-14 (1.00 )    |
| Formation of rad19        | 1.52610e-14 (1.000 )   | 1.52610e-14 (1.000 )   |
| H-abstraction to cyc2enyl | 1.06427e-18 (6.97e-05) | 1.06427e-18 (6.97e-05) |
| H-abstraction to cyclenyl | 2.46309e-22 (1.61e-08) | 2.46309e-22 (1.61e-08) |

| species                       | PYtrue      | Cumul    | PYeffective | Cumul    |
|-------------------------------|-------------|----------|-------------|----------|
| Indene+H                      | 0.999565    | 0.999565 | 0.999565    | 0.999565 |
| PhCHCCH2+H                    | 0.000345433 | 0.999911 | 0.000345433 | 0.999911 |
| Benzene+cycloprop-2-enylidene | 6.97330e-05 | 0.999980 | 6.97330e-05 | 0.999980 |
| PhCCH+CH3                     | 6.16243e-06 | 0.999987 | 6.16243e-06 | 0.999987 |
| C2H2+PhCH2                    | 4.87110e-06 | 0.999991 | 4.87110e-06 | 0.999991 |
| PhCCCH3+H                     | 3.65492e-06 | 0.999995 | 3.65492e-06 | 0.999995 |
| Ph+MeAc                       | 3.05169e-06 | 0.999998 | 3.05169e-06 | 0.999998 |
| rad67                         | 8.96414e-07 | 0.999999 | 8.96414e-07 | 0.999999 |
| rad35                         | 3.86641e-07 | 0.999999 | 3.86641e-07 | 0.999999 |
| Ph+Allene                     | 3.37776e-07 | 1.000000 | 3.37776e-07 | 1.000000 |
| PhCH2CCH+H                    | 4.78388e-08 | 1.000000 | 4.78388e-08 | 1.000000 |
| PAH7+H                        | 3.90324e-08 | 1.000000 | 3.90324e-08 | 1.000000 |
| Benzene+cycloprop-1-enylidene | 1.61386e-08 | 1.000000 | 1.61386e-08 | 1.000000 |
| rad39                         | 1.10085e-08 | 1.000000 | 1.10085e-08 | 1.000000 |
| rad37                         | 1.06172e-08 | 1.000000 | 1.06172e-08 | 1.000000 |
| rad30                         | 7.36603e-09 | 1.000000 | 7.36603e-09 | 1.000000 |
| PAH9+H                        | 5.82902e-10 | 1.000000 | 5.82902e-10 | 1.000000 |
| rad38                         | 2.68036e-10 | 1.000000 | 2.68036e-10 | 1.000000 |
| rad60syn                      | 4.15004e-11 | 1.000000 | 4.15004e-11 | 1.000000 |
| PAH10+CH3                     | 3.15724e-11 | 1.000000 | 3.15724e-11 | 1.000000 |
| PAH3+H                        | 2.30055e-11 | 1.000000 | 2.30055e-11 | 1.000000 |
| rad60anti                     | 2.07416e-11 | 1.000000 | 2.07416e-11 | 1.000000 |
| PhcycC3H3_A+H                 | 1.75314e-11 | 1.000000 | 1.75314e-11 | 1.000000 |
| rad46                         | 1.72300e-11 | 1.000000 | 1.72300e-11 | 1.000000 |
| rad59                         | 4.53088e-12 | 1.000000 | 4.53088e-12 | 1.000000 |
| rad43                         | 1.18504e-12 | 1.000000 | 1.18504e-12 | 1.000000 |
| rad54                         | 1.15325e-12 | 1.000000 | 1.15325e-12 | 1.000000 |
| rad62                         | 2.64143e-13 | 1.000000 | 2.64143e-13 | 1.000000 |
| Phenyl+cycC3H4                | 1.83626e-13 | 1.000000 | 0.000000    | 1.000000 |
| rad50                         | 1.83198e-13 | 1.000000 | 1.83198e-13 | 1.000000 |
| PhcycC3H3_B+H                 | 8.87690e-14 | 1.000000 | 8.87690e-14 | 1.000000 |
| rad70                         | 3.01009e-14 | 1.000000 | 3.01009e-14 | 1.000000 |
| rad55                         | 1.33496e-14 | 1.000000 | 1.33496e-14 | 1.000000 |
| PAH1+H                        | 1.21077e-14 | 1.000000 | 1.21077e-14 | 1.000000 |
| rad52                         | 1.67258e-15 | 1.000000 | 1.67258e-15 | 1.000000 |
| rad58                         | 9.13220e-16 | 1.000000 | 9.13220e-16 | 1.000000 |
| rad34                         | 6.67958e-16 | 1.000000 | 6.67958e-16 | 1.000000 |
| rad51                         | 6.33617e-16 | 1.000000 | 6.33617e-16 | 1.000000 |
| rad41                         | 1.57585e-16 | 1.000000 | 1.57585e-16 | 1.000000 |
| rad42                         | 1.06227e-16 | 1.000000 | 1.06227e-16 | 1.000000 |
| rad65                         | 1.53192e-17 | 1.000000 | 1.53192e-17 | 1.000000 |
| rad53                         | 9.61974e-19 | 1.000000 | 9.61974e-19 | 1.000000 |
| rad64                         | 2.21495e-19 | 1.000000 | 2.21495e-19 | 1.000000 |
| rad61                         | 2.60103e-20 | 1.000000 | 2.60103e-20 | 1.000000 |
| rad56                         | 1.46279e-21 | 1.000000 | 1.46279e-21 | 1.000000 |
| rad68syn                      | 1.59261e-22 | 1.000000 | 1.59261e-22 | 1.000000 |
| rad68anti                     | 1.23075e-22 | 1.000000 | 1.23075e-22 | 1.000000 |
| rad40syn                      | 6.17076e-25 | 1.000000 | 6.17076e-25 | 1.000000 |
| rad40anti                     | 4.95189e-25 | 1.000000 | 4.95189e-25 | 1.000000 |
| PAH8+H                        | 4.65852e-26 | 1.000000 | 4.65852e-26 | 1.000000 |
| rad73                         | 2.55582e-26 | 1.000000 | 2.55582e-26 | 1.000000 |
| rad71                         | 6.53613e-29 | 1.000000 | 6.53613e-29 | 1.000000 |
| rad19anti                     | 1.88664e-32 | 1.000000 | 1.88664e-32 | 1.000000 |
| rad6                          | 1.35756e-32 | 1.000000 | 1.35756e-32 | 1.000000 |
| rad47                         | 7.19638e-33 | 1.000000 | 7.19638e-33 | 1.000000 |
| rad26                         | 3.50242e-33 | 1.000000 | 3.50242e-33 | 1.000000 |
| rad2                          | 3.08096e-33 | 1.000000 | 3.08096e-33 | 1.000000 |
| rad28                         | 9.92029e-34 | 1.000000 | 9.92029e-34 | 1.000000 |
| rad1                          | 2.08760e-34 | 1.000000 | 2.08760e-34 | 1.000000 |
| rad10                         | 1.53906e-34 | 1.000000 | 1.53906e-34 | 1.000000 |
| rad3                          | 2.88776e-35 | 1.000000 | 2.88776e-35 | 1.000000 |
| rad4                          | 1.48482e-35 | 1.000000 | 1.48482e-35 | 1.000000 |
| rad14                         | 2.36432e-36 | 1.000000 | 2.36432e-36 | 1.000000 |
| rad25                         | 1.42171e-36 | 1.000000 | 1.42171e-36 | 1.000000 |
| rad7                          | 1.00688e-36 | 1.000000 | 1.00688e-36 | 1.000000 |
| rad27                         | 3.29030e-37 | 1.000000 | 3.29030e-37 | 1.000000 |
| rad11                         | 2.53036e-37 | 1.000000 | 2.53036e-37 | 1.000000 |
| rad9                          | 1.04774e-37 | 1.000000 | 1.04774e-37 | 1.000000 |
| rad31                         | 8.89667e-38 | 1.000000 | 8.89667e-38 | 1.000000 |
| rad13                         | 5.65975e-39 | 1.000000 | 5.65975e-39 | 1.000000 |
| rad5                          | 4.12928e-40 | 1.000000 | 4.12928e-40 | 1.000000 |
| rad33                         | 5.79864e-41 | 1.000000 | 5.79864e-41 | 1.000000 |
| rad15                         | 4.64264e-41 | 1.000000 | 4.64264e-41 | 1.000000 |
| rad19syn                      | 2.51002e-41 | 1.000000 | 2.51002e-41 | 1.000000 |
| rad20                         | 5.77625e-43 | 1.000000 | 5.77625e-43 | 1.000000 |
| rad21                         | 5.14873e-43 | 1.000000 | 5.14873e-43 | 1.000000 |
| rad12                         | 1.02406e-43 | 1.000000 | 1.02406e-43 | 1.000000 |

|       |             |          |             |          |
|-------|-------------|----------|-------------|----------|
| rad23 | 5.96314e-44 | 1.000000 | 5.96314e-44 | 1.000000 |
| rad18 | 2.13685e-45 | 1.000000 | 2.13685e-45 | 1.000000 |
| rad45 | 9.57527e-46 | 1.000000 | 9.57527e-46 | 1.000000 |
| rad36 | 5.94597e-47 | 1.000000 | 5.94597e-47 | 1.000000 |
| rad22 | 6.03997e-48 | 1.000000 | 6.03997e-48 | 1.000000 |
| rad24 | 5.81689e-48 | 1.000000 | 5.81689e-48 | 1.000000 |
| rad8  | 1.36072e-64 | 1.000000 | 1.36072e-64 | 1.000000 |

0.100000000E-06 Pa, 210.000000 K

| Rate constant             | True (fraction)        | Effective (fraction)   |
|---------------------------|------------------------|------------------------|
| Total                     | 1.74272e-14 (1.00)     | 1.74272e-14 (1.00)     |
| Formation of rad19        | 1.74253e-14 (1.000)    | 1.74253e-14 (1.000)    |
| H-abstraction to cyc2enyl | 1.89310e-18 (0.000109) | 1.89310e-18 (0.000109) |
| H-abstraction to cyclenyl | 6.66714e-22 (3.83e-08) | 6.66714e-22 (3.83e-08) |

| species                       | PYtrue      | Cumul    | PYeffective | Cumul    |
|-------------------------------|-------------|----------|-------------|----------|
| Indene+H                      | 0.999511    | 0.999511 | 0.999511    | 0.999511 |
| PhCHCCH2+H                    | 0.000359771 | 0.999871 | 0.000359771 | 0.999871 |
| Benzene+cycloprop-2-enylidene | 0.000108629 | 0.999980 | 0.000108629 | 0.999980 |
| PhCCH+CH3                     | 6.42954e-06 | 0.999986 | 6.42954e-06 | 0.999986 |
| C2H2+PhCH2                    | 5.13705e-06 | 0.999991 | 5.13705e-06 | 0.999991 |
| PhCCCH3+H                     | 3.83397e-06 | 0.999995 | 3.83397e-06 | 0.999995 |
| Ph+MeAc                       | 3.23682e-06 | 0.999998 | 3.23682e-06 | 0.999998 |
| rad67                         | 9.48433e-07 | 0.999999 | 9.48433e-07 | 0.999999 |
| rad35                         | 4.08123e-07 | 1.000000 | 4.08123e-07 | 1.000000 |
| Ph+Allene                     | 3.66908e-07 | 1.000000 | 3.66908e-07 | 1.000000 |
| PhCH2CCH+H                    | 5.27181e-08 | 1.000000 | 5.27181e-08 | 1.000000 |
| PAH7+H                        | 4.18517e-08 | 1.000000 | 4.18517e-08 | 1.000000 |
| Benzene+cycloprop-1-enylidene | 3.82571e-08 | 1.000000 | 3.82571e-08 | 1.000000 |
| rad39                         | 1.18003e-08 | 1.000000 | 1.18003e-08 | 1.000000 |
| rad37                         | 1.14322e-08 | 1.000000 | 1.14322e-08 | 1.000000 |
| rad30                         | 7.79386e-09 | 1.000000 | 7.79386e-09 | 1.000000 |
| PAH9+H                        | 6.28582e-10 | 1.000000 | 6.28582e-10 | 1.000000 |
| rad38                         | 2.91718e-10 | 1.000000 | 2.91718e-10 | 1.000000 |
| rad60syn                      | 4.50097e-11 | 1.000000 | 4.50097e-11 | 1.000000 |
| PAH10+CH3                     | 3.69848e-11 | 1.000000 | 3.69848e-11 | 1.000000 |
| PAH3+H                        | 2.57613e-11 | 1.000000 | 2.57613e-11 | 1.000000 |
| PhcycC3H3_A+H                 | 2.31914e-11 | 1.000000 | 2.31914e-11 | 1.000000 |
| rad60anti                     | 2.25454e-11 | 1.000000 | 2.25454e-11 | 1.000000 |
| rad46                         | 1.88621e-11 | 1.000000 | 1.88621e-11 | 1.000000 |
| rad59                         | 5.04687e-12 | 1.000000 | 5.04687e-12 | 1.000000 |
| rad43                         | 1.35708e-12 | 1.000000 | 1.35708e-12 | 1.000000 |
| rad54                         | 1.34969e-12 | 1.000000 | 1.34969e-12 | 1.000000 |
| rad62                         | 3.02922e-13 | 1.000000 | 3.02922e-13 | 1.000000 |
| Phenyl+cycC3H4                | 2.70226e-13 | 1.000000 | 0.000000    | 1.000000 |
| rad50                         | 2.10210e-13 | 1.000000 | 2.10210e-13 | 1.000000 |
| PhcycC3H3_B+H                 | 1.51586e-13 | 1.000000 | 1.51586e-13 | 1.000000 |
| rad70                         | 3.68946e-14 | 1.000000 | 3.68946e-14 | 1.000000 |
| rad55                         | 1.63588e-14 | 1.000000 | 1.63588e-14 | 1.000000 |
| PAH1+H                        | 1.57712e-14 | 1.000000 | 1.57712e-14 | 1.000000 |
| rad52                         | 1.98838e-15 | 1.000000 | 1.98838e-15 | 1.000000 |
| rad58                         | 1.14364e-15 | 1.000000 | 1.14364e-15 | 1.000000 |
| rad34                         | 8.73664e-16 | 1.000000 | 8.73664e-16 | 1.000000 |
| rad51                         | 7.85267e-16 | 1.000000 | 7.85267e-16 | 1.000000 |
| rad41                         | 2.13280e-16 | 1.000000 | 2.13280e-16 | 1.000000 |
| rad42                         | 1.39947e-16 | 1.000000 | 1.39947e-16 | 1.000000 |
| rad65                         | 1.92990e-17 | 1.000000 | 1.92990e-17 | 1.000000 |
| rad53                         | 1.63950e-18 | 1.000000 | 1.63950e-18 | 1.000000 |
| rad64                         | 4.08414e-19 | 1.000000 | 4.08414e-19 | 1.000000 |
| rad61                         | 6.05363e-20 | 1.000000 | 6.05363e-20 | 1.000000 |
| rad56                         | 3.74745e-21 | 1.000000 | 3.74745e-21 | 1.000000 |
| rad68syn                      | 4.25367e-22 | 1.000000 | 4.25367e-22 | 1.000000 |
| rad68anti                     | 3.26442e-22 | 1.000000 | 3.26442e-22 | 1.000000 |
| rad40syn                      | 2.29907e-24 | 1.000000 | 2.29907e-24 | 1.000000 |
| rad40anti                     | 1.84461e-24 | 1.000000 | 1.84461e-24 | 1.000000 |
| PAH8+H                        | 2.19678e-25 | 1.000000 | 2.19678e-25 | 1.000000 |
| rad73                         | 9.27903e-26 | 1.000000 | 9.27903e-26 | 1.000000 |
| rad71                         | 3.39170e-28 | 1.000000 | 3.39170e-28 | 1.000000 |
| rad19anti                     | 5.76790e-32 | 1.000000 | 5.76790e-32 | 1.000000 |
| rad6                          | 2.20008e-32 | 1.000000 | 2.20008e-32 | 1.000000 |
| rad47                         | 7.72082e-33 | 1.000000 | 7.72082e-33 | 1.000000 |
| rad2                          | 5.67886e-33 | 1.000000 | 5.67886e-33 | 1.000000 |
| rad26                         | 3.32492e-33 | 1.000000 | 3.32492e-33 | 1.000000 |
| rad28                         | 9.27982e-34 | 1.000000 | 9.27982e-34 | 1.000000 |
| rad1                          | 3.87996e-34 | 1.000000 | 3.87996e-34 | 1.000000 |
| rad10                         | 2.87925e-34 | 1.000000 | 2.87925e-34 | 1.000000 |
| rad3                          | 4.93687e-35 | 1.000000 | 4.93687e-35 | 1.000000 |

|          |             |         |             |         |
|----------|-------------|---------|-------------|---------|
| rad4     | 2.54419e-35 | 1.00000 | 2.54419e-35 | 1.00000 |
| rad14    | 2.41383e-36 | 1.00000 | 2.41383e-36 | 1.00000 |
| rad7     | 1.63537e-36 | 1.00000 | 1.63537e-36 | 1.00000 |
| rad25    | 1.48130e-36 | 1.00000 | 1.48130e-36 | 1.00000 |
| rad11    | 4.07875e-37 | 1.00000 | 4.07875e-37 | 1.00000 |
| rad27    | 3.47192e-37 | 1.00000 | 3.47192e-37 | 1.00000 |
| rad31    | 2.17525e-37 | 1.00000 | 2.17525e-37 | 1.00000 |
| rad9     | 1.49484e-37 | 1.00000 | 1.49484e-37 | 1.00000 |
| rad13    | 9.20640e-39 | 1.00000 | 9.20640e-39 | 1.00000 |
| rad5     | 3.95666e-40 | 1.00000 | 3.95666e-40 | 1.00000 |
| rad19syn | 8.46110e-41 | 1.00000 | 8.46110e-41 | 1.00000 |
| rad33    | 7.32310e-41 | 1.00000 | 7.32310e-41 | 1.00000 |
| rad15    | 6.63593e-41 | 1.00000 | 6.63593e-41 | 1.00000 |
| rad20    | 7.13846e-43 | 1.00000 | 7.13846e-43 | 1.00000 |
| rad21    | 6.43658e-43 | 1.00000 | 6.43658e-43 | 1.00000 |
| rad23    | 2.06701e-43 | 1.00000 | 2.06701e-43 | 1.00000 |
| rad12    | 1.71209e-43 | 1.00000 | 1.71209e-43 | 1.00000 |
| rad45    | 3.71097e-45 | 1.00000 | 3.71097e-45 | 1.00000 |
| rad18    | 2.35211e-45 | 1.00000 | 2.35211e-45 | 1.00000 |
| rad36    | 2.31189e-46 | 1.00000 | 2.31189e-46 | 1.00000 |
| rad24    | 8.63998e-48 | 1.00000 | 8.63998e-48 | 1.00000 |
| rad22    | 7.51896e-48 | 1.00000 | 7.51896e-48 | 1.00000 |
| rad8     | 2.32606e-64 | 1.00000 | 2.32606e-64 | 1.00000 |

0.100000000E-06 Pa, 220.000000 K

| Rate constant             | True (fraction)        | Effective (fraction)   |
|---------------------------|------------------------|------------------------|
| Total                     | 1.97009e-14 (1.00 )    | 1.97009e-14 (1.00 )    |
| Formation of rad19        | 1.96977e-14 (1.000 )   | 1.96977e-14 (1.000 )   |
| H-abstraction to cyc2enyl | 3.19064e-18 (0.000162) | 3.19064e-18 (0.000162) |
| H-abstraction to cyclenyl | 1.64627e-21 (8.36e-08) | 1.64627e-21 (8.36e-08) |

| species                       | PYtrue      | Cumul    | PYeffective | Cumul    |
|-------------------------------|-------------|----------|-------------|----------|
| Indene+H                      | 0.999441    | 0.999441 | 0.999441    | 0.999441 |
| PhCHCCH2+H                    | 0.000375424 | 0.999816 | 0.000375424 | 0.999816 |
| Benzene+cycloprop-2-enylidene | 0.000161954 | 0.999978 | 0.000161954 | 0.999978 |
| PhCCH+CH3                     | 6.72039e-06 | 0.999985 | 6.72039e-06 | 0.999985 |
| C2H2+PhCH2                    | 5.43098e-06 | 0.999991 | 5.43098e-06 | 0.999991 |
| PhCCCH3+H                     | 4.03052e-06 | 0.999995 | 4.03052e-06 | 0.999995 |
| Ph+MeAc                       | 3.44236e-06 | 0.999998 | 3.44236e-06 | 0.999998 |
| rad67                         | 1.00612e-06 | 0.999999 | 1.00612e-06 | 0.999999 |
| rad35                         | 4.31892e-07 | 0.999999 | 4.31892e-07 | 0.999999 |
| Ph+Allene                     | 4.00152e-07 | 1.000000 | 4.00152e-07 | 1.000000 |
| Benzene+cycloprop-1-enylidene | 8.35632e-08 | 1.000000 | 8.35632e-08 | 1.000000 |
| PhCH2CCH+H                    | 5.83685e-08 | 1.000000 | 5.83685e-08 | 1.000000 |
| PAH7+H                        | 4.50239e-08 | 1.000000 | 4.50239e-08 | 1.000000 |
| rad39                         | 1.26902e-08 | 1.000000 | 1.26902e-08 | 1.000000 |
| rad37                         | 1.23532e-08 | 1.000000 | 1.23532e-08 | 1.000000 |
| rad30                         | 8.26934e-09 | 1.000000 | 8.26934e-09 | 1.000000 |
| PAH9+H                        | 6.80449e-10 | 1.000000 | 6.80449e-10 | 1.000000 |
| rad38                         | 3.18912e-10 | 1.000000 | 3.18912e-10 | 1.000000 |
| rad60syn                      | 4.90141e-11 | 1.000000 | 4.90141e-11 | 1.000000 |
| PAH10+CH3                     | 4.36275e-11 | 1.000000 | 4.36275e-11 | 1.000000 |
| PhcycC3H3_A+H                 | 3.07931e-11 | 1.000000 | 3.07931e-11 | 1.000000 |
| PAH3+H                        | 2.90111e-11 | 1.000000 | 2.90111e-11 | 1.000000 |
| rad60anti                     | 2.46085e-11 | 1.000000 | 2.46085e-11 | 1.000000 |
| rad46                         | 2.07451e-11 | 1.000000 | 2.07451e-11 | 1.000000 |
| rad59                         | 5.65179e-12 | 1.000000 | 5.65179e-12 | 1.000000 |
| rad54                         | 1.59075e-12 | 1.000000 | 1.59075e-12 | 1.000000 |
| rad43                         | 1.56310e-12 | 1.000000 | 1.56310e-12 | 1.000000 |
| Phenyl+cycC3H4                | 3.96956e-13 | 1.000000 | 0.000000    | 1.000000 |
| rad62                         | 3.49289e-13 | 1.000000 | 3.49289e-13 | 1.000000 |
| PhcycC3H3_B+H                 | 2.54101e-13 | 1.000000 | 2.54101e-13 | 1.000000 |
| rad50                         | 2.42929e-13 | 1.000000 | 2.42929e-13 | 1.000000 |
| rad70                         | 4.55816e-14 | 1.000000 | 4.55816e-14 | 1.000000 |
| PAH1+H                        | 2.06978e-14 | 1.000000 | 2.06978e-14 | 1.000000 |
| rad55                         | 2.02024e-14 | 1.000000 | 2.02024e-14 | 1.000000 |
| rad52                         | 2.38419e-15 | 1.000000 | 2.38419e-15 | 1.000000 |
| rad58                         | 1.44438e-15 | 1.000000 | 1.44438e-15 | 1.000000 |
| rad34                         | 1.15142e-15 | 1.000000 | 1.15142e-15 | 1.000000 |
| rad51                         | 9.82815e-16 | 1.000000 | 9.82815e-16 | 1.000000 |
| rad41                         | 2.89888e-16 | 1.000000 | 2.89888e-16 | 1.000000 |
| rad42                         | 1.85167e-16 | 1.000000 | 1.85167e-16 | 1.000000 |
| rad65                         | 2.45506e-17 | 1.000000 | 2.45506e-17 | 1.000000 |
| rad53                         | 2.75830e-18 | 1.000000 | 2.75830e-18 | 1.000000 |
| rad64                         | 7.36243e-19 | 1.000000 | 7.36243e-19 | 1.000000 |
| rad61                         | 1.34204e-19 | 1.000000 | 1.34204e-19 | 1.000000 |
| rad56                         | 9.05591e-21 | 1.000000 | 9.05591e-21 | 1.000000 |

|           |             |         |             |         |
|-----------|-------------|---------|-------------|---------|
| rad68syn  | 1.06496e-21 | 1.00000 | 1.06496e-21 | 1.00000 |
| rad68anti | 8.11646e-22 | 1.00000 | 8.11646e-22 | 1.00000 |
| rad40syn  | 7.73817e-24 | 1.00000 | 7.73817e-24 | 1.00000 |
| rad40anti | 6.20298e-24 | 1.00000 | 6.20298e-24 | 1.00000 |
| PAH8+H    | 9.11871e-25 | 1.00000 | 9.11871e-25 | 1.00000 |
| rad73     | 3.07722e-25 | 1.00000 | 3.07722e-25 | 1.00000 |
| rad71     | 1.53452e-27 | 1.00000 | 1.53452e-27 | 1.00000 |
| rad19anti | 1.83731e-31 | 1.00000 | 1.83731e-31 | 1.00000 |
| rad6      | 4.13044e-32 | 1.00000 | 4.13044e-32 | 1.00000 |
| rad2      | 1.05938e-32 | 1.00000 | 1.05938e-32 | 1.00000 |
| rad47     | 8.39990e-33 | 1.00000 | 8.39990e-33 | 1.00000 |
| rad26     | 3.18436e-33 | 1.00000 | 3.18436e-33 | 1.00000 |
| rad28     | 8.77587e-34 | 1.00000 | 8.77587e-34 | 1.00000 |
| rad1      | 7.30338e-34 | 1.00000 | 7.30338e-34 | 1.00000 |
| rad10     | 5.58890e-34 | 1.00000 | 5.58890e-34 | 1.00000 |
| rad3      | 9.14263e-35 | 1.00000 | 9.14263e-35 | 1.00000 |
| rad4      | 4.72329e-35 | 1.00000 | 4.72329e-35 | 1.00000 |
| rad7      | 3.07709e-36 | 1.00000 | 3.07709e-36 | 1.00000 |
| rad14     | 2.47759e-36 | 1.00000 | 2.47759e-36 | 1.00000 |
| rad25     | 1.55253e-36 | 1.00000 | 1.55253e-36 | 1.00000 |
| rad11     | 7.62157e-37 | 1.00000 | 7.62157e-37 | 1.00000 |
| rad31     | 5.54361e-37 | 1.00000 | 5.54361e-37 | 1.00000 |
| rad27     | 3.68766e-37 | 1.00000 | 3.68766e-37 | 1.00000 |
| rad9      | 2.17871e-37 | 1.00000 | 2.17871e-37 | 1.00000 |
| rad13     | 1.73508e-38 | 1.00000 | 1.73508e-38 | 1.00000 |
| rad5      | 3.80199e-40 | 1.00000 | 3.80199e-40 | 1.00000 |
| rad19syn  | 2.99699e-40 | 1.00000 | 2.99699e-40 | 1.00000 |
| rad33     | 9.94306e-41 | 1.00000 | 9.94306e-41 | 1.00000 |
| rad15     | 9.69052e-41 | 1.00000 | 9.69052e-41 | 1.00000 |
| rad20     | 8.92738e-43 | 1.00000 | 8.92738e-43 | 1.00000 |
| rad21     | 8.14776e-43 | 1.00000 | 8.14776e-43 | 1.00000 |
| rad23     | 7.79934e-43 | 1.00000 | 7.79934e-43 | 1.00000 |
| rad12     | 2.93730e-43 | 1.00000 | 2.93730e-43 | 1.00000 |
| rad45     | 1.41900e-44 | 1.00000 | 1.41900e-44 | 1.00000 |
| rad18     | 2.60536e-45 | 1.00000 | 2.60536e-45 | 1.00000 |
| rad36     | 8.87301e-46 | 1.00000 | 8.87301e-46 | 1.00000 |
| rad24     | 1.30906e-47 | 1.00000 | 1.30906e-47 | 1.00000 |
| rad22     | 1.20063e-47 | 1.00000 | 1.20063e-47 | 1.00000 |
| rad8      | 4.06073e-64 | 1.00000 | 4.06073e-64 | 1.00000 |

0.100000000E-06 Pa, 230.000000 K

| Rate constant             | True (fraction)        | Effective (fraction)   |
|---------------------------|------------------------|------------------------|
| Total                     | 2.20761e-14 (1.00 )    | 2.20761e-14 (1.00 )    |
| Formation of rad19        | 2.20710e-14 (1.000 )   | 2.20710e-14 (1.000 )   |
| H-abstraction to cyc2enyl | 5.13155e-18 (0.000232) | 5.13155e-18 (0.000232) |
| H-abstraction to cyclenyl | 3.75316e-21 (1.70e-07) | 3.75316e-21 (1.70e-07) |

| species                       | PYtrue      | Cumul    | PYeffective | Cumul    |
|-------------------------------|-------------|----------|-------------|----------|
| Indene+H                      | 0.999352    | 0.999352 | 0.999352    | 0.999352 |
| PhCHCCH2+H                    | 0.000392520 | 0.999745 | 0.000392520 | 0.999745 |
| Benzene+cycloprop-2-enylidene | 0.000232448 | 0.999977 | 0.000232448 | 0.999977 |
| PhCCH+CH3                     | 7.03712e-06 | 0.999984 | 7.03712e-06 | 0.999984 |
| C2H2+PhCH2                    | 5.75601e-06 | 0.999990 | 5.75601e-06 | 0.999990 |
| PhCCCH3+H                     | 4.24633e-06 | 0.999994 | 4.24633e-06 | 0.999994 |
| Ph+MeAc                       | 3.67074e-06 | 0.999998 | 3.67074e-06 | 0.999998 |
| rad67                         | 1.07014e-06 | 0.999999 | 1.07014e-06 | 0.999999 |
| rad35                         | 4.58209e-07 | 1.000000 | 4.58209e-07 | 1.000000 |
| Ph+Allene                     | 4.38150e-07 | 1.000000 | 4.38150e-07 | 1.000000 |
| Benzene+cycloprop-1-enylidene | 1.70010e-07 | 1.000000 | 1.70010e-07 | 1.000000 |
| PhCH2CCH+H                    | 6.49255e-08 | 1.000000 | 6.49255e-08 | 1.000000 |
| PAH7+H                        | 4.85973e-08 | 1.000000 | 4.85973e-08 | 1.000000 |
| rad39                         | 1.36916e-08 | 1.000000 | 1.36916e-08 | 1.000000 |
| rad37                         | 1.33953e-08 | 1.000000 | 1.33953e-08 | 1.000000 |
| rad30                         | 8.79825e-09 | 1.000000 | 8.79825e-09 | 1.000000 |
| PAH9+H                        | 7.39444e-10 | 1.000000 | 7.39444e-10 | 1.000000 |
| rad38                         | 3.50209e-10 | 1.000000 | 3.50209e-10 | 1.000000 |
| rad60syn                      | 5.35915e-11 | 1.000000 | 5.35915e-11 | 1.000000 |
| PAH10+CH3                     | 5.18070e-11 | 1.000000 | 5.18070e-11 | 1.000000 |
| PhcycC3H3_A+H                 | 4.10038e-11 | 1.000000 | 4.10038e-11 | 1.000000 |
| PAH3+H                        | 3.28545e-11 | 1.000000 | 3.28545e-11 | 1.000000 |
| rad60anti                     | 2.69725e-11 | 1.000000 | 2.69725e-11 | 1.000000 |
| rad46                         | 2.29232e-11 | 1.000000 | 2.29232e-11 | 1.000000 |
| rad59                         | 6.36289e-12 | 1.000000 | 6.36289e-12 | 1.000000 |
| rad54                         | 1.88753e-12 | 1.000000 | 1.88753e-12 | 1.000000 |
| rad43                         | 1.81040e-12 | 1.000000 | 1.81040e-12 | 1.000000 |
| Phenyl+cycC3H4                | 5.81829e-13 | 1.000000 | 0.000000    | 1.000000 |
| PhcycC3H3_B+H                 | 4.18958e-13 | 1.000000 | 4.18958e-13 | 1.000000 |



|           |             |         |             |         |
|-----------|-------------|---------|-------------|---------|
| rad62     | 4.04844e-13 | 1.00000 | 4.04844e-13 | 1.00000 |
| rad50     | 2.82714e-13 | 1.00000 | 2.82714e-13 | 1.00000 |
| rad70     | 5.67286e-14 | 1.00000 | 5.67286e-14 | 1.00000 |
| PAH1+H    | 2.73412e-14 | 1.00000 | 2.73412e-14 | 1.00000 |
| rad55     | 2.51284e-14 | 1.00000 | 2.51284e-14 | 1.00000 |
| rad52     | 2.88263e-15 | 1.00000 | 2.88263e-15 | 1.00000 |
| rad58     | 1.83842e-15 | 1.00000 | 1.83842e-15 | 1.00000 |
| rad34     | 1.52752e-15 | 1.00000 | 1.52752e-15 | 1.00000 |
| rad51     | 1.24150e-15 | 1.00000 | 1.24150e-15 | 1.00000 |
| rad41     | 3.95307e-16 | 1.00000 | 3.95307e-16 | 1.00000 |
| rad42     | 2.45831e-16 | 1.00000 | 2.45831e-16 | 1.00000 |
| rad65     | 3.15147e-17 | 1.00000 | 3.15147e-17 | 1.00000 |
| rad53     | 4.58652e-18 | 1.00000 | 4.58652e-18 | 1.00000 |
| rad64     | 1.30089e-18 | 1.00000 | 1.30089e-18 | 1.00000 |
| rad61     | 2.85229e-19 | 1.00000 | 2.85229e-19 | 1.00000 |
| rad56     | 2.08059e-20 | 1.00000 | 2.08059e-20 | 1.00000 |
| rad68syn  | 2.52167e-21 | 1.00000 | 2.52167e-21 | 1.00000 |
| rad68anti | 1.90889e-21 | 1.00000 | 1.90889e-21 | 1.00000 |
| rad40syn  | 2.38315e-23 | 1.00000 | 2.38315e-23 | 1.00000 |
| rad40anti | 1.90761e-23 | 1.00000 | 1.90761e-23 | 1.00000 |
| PAH8+H    | 3.38041e-24 | 1.00000 | 3.38041e-24 | 1.00000 |
| rad73     | 9.42054e-25 | 1.00000 | 9.42054e-25 | 1.00000 |
| rad71     | 6.14189e-27 | 1.00000 | 6.14189e-27 | 1.00000 |
| rad19anti | 6.07588e-31 | 1.00000 | 6.07588e-31 | 1.00000 |
| rad6      | 9.05953e-32 | 1.00000 | 9.05953e-32 | 1.00000 |
| rad2      | 2.21652e-32 | 1.00000 | 2.21652e-32 | 1.00000 |
| rad47     | 9.27304e-33 | 1.00000 | 9.27304e-33 | 1.00000 |
| rad26     | 3.09228e-33 | 1.00000 | 3.09228e-33 | 1.00000 |
| rad1      | 1.54306e-33 | 1.00000 | 1.54306e-33 | 1.00000 |
| rad10     | 1.13397e-33 | 1.00000 | 1.13397e-33 | 1.00000 |
| rad28     | 8.45705e-34 | 1.00000 | 8.45705e-34 | 1.00000 |
| rad3      | 1.72217e-34 | 1.00000 | 1.72217e-34 | 1.00000 |
| rad4      | 8.92119e-35 | 1.00000 | 8.92119e-35 | 1.00000 |
| rad7      | 6.76408e-36 | 1.00000 | 6.76408e-36 | 1.00000 |
| rad14     | 2.55636e-36 | 1.00000 | 2.55636e-36 | 1.00000 |
| rad11     | 1.66523e-36 | 1.00000 | 1.66523e-36 | 1.00000 |
| rad25     | 1.63661e-36 | 1.00000 | 1.63661e-36 | 1.00000 |
| rad31     | 1.47015e-36 | 1.00000 | 1.47015e-36 | 1.00000 |
| rad27     | 3.94258e-37 | 1.00000 | 3.94258e-37 | 1.00000 |
| rad9      | 3.24564e-37 | 1.00000 | 3.24564e-37 | 1.00000 |
| rad13     | 3.82089e-38 | 1.00000 | 3.82089e-38 | 1.00000 |
| rad19syn  | 1.11381e-39 | 1.00000 | 1.11381e-39 | 1.00000 |
| rad5      | 3.66256e-40 | 1.00000 | 3.66256e-40 | 1.00000 |
| rad33     | 1.52558e-40 | 1.00000 | 1.52558e-40 | 1.00000 |
| rad15     | 1.44655e-40 | 1.00000 | 1.44655e-40 | 1.00000 |
| rad23     | 3.18897e-42 | 1.00000 | 3.18897e-42 | 1.00000 |
| rad20     | 1.12993e-42 | 1.00000 | 1.12993e-42 | 1.00000 |
| rad21     | 1.04450e-42 | 1.00000 | 1.04450e-42 | 1.00000 |
| rad12     | 5.17373e-43 | 1.00000 | 5.17373e-43 | 1.00000 |
| rad45     | 6.54744e-44 | 1.00000 | 6.54744e-44 | 1.00000 |
| rad36     | 4.11125e-45 | 1.00000 | 4.11125e-45 | 1.00000 |
| rad18     | 2.90384e-45 | 1.00000 | 2.90384e-45 | 1.00000 |
| rad22     | 2.73243e-47 | 1.00000 | 2.73243e-47 | 1.00000 |
| rad24     | 2.02387e-47 | 1.00000 | 2.02387e-47 | 1.00000 |
| rad8      | 7.24167e-64 | 1.00000 | 7.24167e-64 | 1.00000 |

0.100000000E-06 Pa, 240.000000 K

=====

| Rate constant             | True (fraction)        | Effective (fraction)   |
|---------------------------|------------------------|------------------------|
| Total                     | 2.45462e-14 (1.00 )    | 2.45462e-14 (1.00 )    |
| Formation of rad19        | 2.45383e-14 (1.000 )   | 2.45383e-14 (1.000 )   |
| H-abstraction to cyc2enyl | 7.92234e-18 (0.000323) | 7.92234e-18 (0.000323) |
| H-abstraction to cyclenyl | 7.97958e-21 (3.25e-07) | 7.97958e-21 (3.25e-07) |

| species                       | PYtrue      | Cumul    | PYeffective | Cumul    |
|-------------------------------|-------------|----------|-------------|----------|
| Indene+H                      | 0.999241    | 0.999241 | 0.999241    | 0.999241 |
| PhCHCCH2+H                    | 0.000411192 | 0.999652 | 0.000411192 | 0.999652 |
| Benzene+cycloprop-2-enylidene | 0.000322752 | 0.999975 | 0.000322752 | 0.999975 |
| PhCCH+CH3                     | 7.38194e-06 | 0.999982 | 7.38194e-06 | 0.999982 |
| C2H2+PhCH2                    | 6.11553e-06 | 0.999989 | 6.11553e-06 | 0.999989 |
| PhCCCH3+H                     | 4.48334e-06 | 0.999993 | 4.48334e-06 | 0.999993 |
| Ph+MeAc                       | 3.92459e-06 | 0.999997 | 3.92459e-06 | 0.999997 |
| rad67                         | 1.14122e-06 | 0.999998 | 1.14122e-06 | 0.999998 |
| rad35                         | 4.87362e-07 | 0.999999 | 4.87362e-07 | 0.999999 |
| Ph+Allene                     | 4.81641e-07 | 0.999999 | 4.81641e-07 | 0.999999 |
| Benzene+cycloprop-1-enylidene | 3.25084e-07 | 0.999999 | 3.25084e-07 | 0.999999 |
| PhCH2CCH+H                    | 7.25479e-08 | 0.999999 | 7.25479e-08 | 0.999999 |
| PAH7+H                        | 5.26263e-08 | 0.999999 | 5.26263e-08 | 0.999999 |

|                |             |          |             |          |
|----------------|-------------|----------|-------------|----------|
| rad39          | 1.48191e-08 | 0.999999 | 1.48191e-08 | 0.999999 |
| rad37          | 1.45757e-08 | 1.000000 | 1.45757e-08 | 1.000000 |
| rad30          | 9.38702e-09 | 1.000000 | 9.38702e-09 | 1.000000 |
| PAH9+H         | 8.06648e-10 | 1.000000 | 8.06648e-10 | 1.000000 |
| rad38          | 3.86297e-10 | 1.000000 | 3.86297e-10 | 1.000000 |
| PAH10+CH3      | 6.19064e-11 | 1.000000 | 6.19064e-11 | 1.000000 |
| rad60syn       | 5.88324e-11 | 1.000000 | 5.88324e-11 | 1.000000 |
| PhcycC3H3_A+H  | 5.47108e-11 | 1.000000 | 5.47108e-11 | 1.000000 |
| PAH3+H         | 3.74113e-11 | 1.000000 | 3.74113e-11 | 1.000000 |
| rad60anti      | 2.96857e-11 | 1.000000 | 2.96857e-11 | 1.000000 |
| rad46          | 2.54475e-11 | 1.000000 | 2.54475e-11 | 1.000000 |
| rad59          | 7.20068e-12 | 1.000000 | 7.20068e-12 | 1.000000 |
| rad54          | 2.25392e-12 | 1.000000 | 2.25392e-12 | 1.000000 |
| rad43          | 2.10782e-12 | 1.000000 | 2.10782e-12 | 1.000000 |
| Phenyl+cycC3H4 | 8.50545e-13 | 1.000000 | 0.000000    | 1.000000 |
| PhcycC3H3_B+H  | 6.80482e-13 | 1.000000 | 6.80482e-13 | 1.000000 |
| rad62          | 4.71505e-13 | 1.000000 | 4.71505e-13 | 1.000000 |
| rad50          | 3.31266e-13 | 1.000000 | 3.31266e-13 | 1.000000 |
| rad70          | 7.10727e-14 | 1.000000 | 7.10727e-14 | 1.000000 |
| PAH1+H         | 3.63163e-14 | 1.000000 | 3.63163e-14 | 1.000000 |
| rad55          | 3.14580e-14 | 1.000000 | 3.14580e-14 | 1.000000 |
| rad52          | 3.51289e-15 | 1.000000 | 3.51289e-15 | 1.000000 |
| rad58          | 2.35637e-15 | 1.000000 | 2.35637e-15 | 1.000000 |
| rad34          | 2.03779e-15 | 1.000000 | 2.03779e-15 | 1.000000 |
| rad51          | 1.58177e-15 | 1.000000 | 1.58177e-15 | 1.000000 |
| rad41          | 5.40331e-16 | 1.000000 | 5.40331e-16 | 1.000000 |
| rad42          | 3.27191e-16 | 1.000000 | 3.27191e-16 | 1.000000 |
| rad65          | 4.07884e-17 | 1.000000 | 4.07884e-17 | 1.000000 |
| rad53          | 7.54386e-18 | 1.000000 | 7.54386e-18 | 1.000000 |
| rad64          | 2.25729e-18 | 1.000000 | 2.25729e-18 | 1.000000 |
| rad61          | 5.84088e-19 | 1.000000 | 5.84088e-19 | 1.000000 |
| rad56          | 4.57232e-20 | 1.000000 | 4.57232e-20 | 1.000000 |
| rad68syn       | 5.68636e-21 | 1.000000 | 5.68636e-21 | 1.000000 |
| rad68anti      | 4.27665e-21 | 1.000000 | 4.27665e-21 | 1.000000 |
| rad40syn       | 6.78314e-23 | 1.000000 | 6.78314e-23 | 1.000000 |
| rad40anti      | 5.41986e-23 | 1.000000 | 5.41986e-23 | 1.000000 |
| PAH8+H         | 1.13224e-23 | 1.000000 | 1.13224e-23 | 1.000000 |
| rad73          | 2.68346e-24 | 1.000000 | 2.68346e-24 | 1.000000 |
| rad71          | 2.20097e-26 | 1.000000 | 2.20097e-26 | 1.000000 |
| rad19anti      | 2.07742e-30 | 1.000000 | 2.07742e-30 | 1.000000 |
| rad6           | 2.32094e-31 | 1.000000 | 2.32094e-31 | 1.000000 |
| rad2           | 4.76135e-32 | 1.000000 | 4.76135e-32 | 1.000000 |
| rad47          | 1.03946e-32 | 1.000000 | 1.03946e-32 | 1.000000 |
| rad1           | 3.34982e-33 | 1.000000 | 3.34982e-33 | 1.000000 |
| rad26          | 3.07397e-33 | 1.000000 | 3.07397e-33 | 1.000000 |
| rad10          | 2.38951e-33 | 1.000000 | 2.38951e-33 | 1.000000 |
| rad28          | 8.44736e-34 | 1.000000 | 8.44736e-34 | 1.000000 |
| rad3           | 3.34694e-34 | 1.000000 | 3.34694e-34 | 1.000000 |
| rad4           | 1.73889e-34 | 1.000000 | 1.73889e-34 | 1.000000 |
| rad7           | 1.73657e-35 | 1.000000 | 1.73657e-35 | 1.000000 |
| rad11          | 4.25100e-36 | 1.000000 | 4.25100e-36 | 1.000000 |
| rad31          | 4.04869e-36 | 1.000000 | 4.04869e-36 | 1.000000 |
| rad14          | 2.65135e-36 | 1.000000 | 2.65135e-36 | 1.000000 |
| rad25          | 1.73514e-36 | 1.000000 | 1.73514e-36 | 1.000000 |
| rad9           | 4.94786e-37 | 1.000000 | 4.94786e-37 | 1.000000 |
| rad27          | 4.24350e-37 | 1.000000 | 4.24350e-37 | 1.000000 |
| rad13          | 9.82916e-38 | 1.000000 | 9.82916e-38 | 1.000000 |
| rad19syn       | 4.33470e-39 | 1.000000 | 4.33470e-39 | 1.000000 |
| rad5           | 3.53618e-40 | 1.000000 | 3.53618e-40 | 1.000000 |
| rad33          | 2.83092e-40 | 1.000000 | 2.83092e-40 | 1.000000 |
| rad15          | 2.20994e-40 | 1.000000 | 2.20994e-40 | 1.000000 |
| rad23          | 1.40467e-41 | 1.000000 | 1.40467e-41 | 1.000000 |
| rad20          | 1.44777e-42 | 1.000000 | 1.44777e-42 | 1.000000 |
| rad21          | 1.35637e-42 | 1.000000 | 1.35637e-42 | 1.000000 |
| rad12          | 9.36132e-43 | 1.000000 | 9.36132e-43 | 1.000000 |
| rad45          | 3.11541e-43 | 1.000000 | 3.11541e-43 | 1.000000 |
| rad36          | 1.96546e-44 | 1.000000 | 1.96546e-44 | 1.000000 |
| rad18          | 3.25733e-45 | 1.000000 | 3.25733e-45 | 1.000000 |
| rad22          | 8.43053e-47 | 1.000000 | 8.43053e-47 | 1.000000 |
| rad24          | 3.19427e-47 | 1.000000 | 3.19427e-47 | 1.000000 |
| rad8           | 1.31971e-63 | 1.000000 | 1.31971e-63 | 1.000000 |

0.100000000E-06 Pa, 250.000000 K

=====

| Rate constant             | True (fraction)        | Effective (fraction)   |
|---------------------------|------------------------|------------------------|
| Total                     | 2.71048e-14 (1.00 )    | 2.71048e-14 (1.00 )    |
| Formation of rad19        | 2.70930e-14 (1.000 )   | 2.70930e-14 (1.000 )   |
| H-abstraction to cyc2enyl | 1.17991e-17 (0.000435) | 1.17991e-17 (0.000435) |
| H-abstraction to cyclenyl | 1.59554e-20 (5.89e-07) | 1.59554e-20 (5.89e-07) |

| species                       | PYtrue      | Cumul    | PYeffective | Cumul    |
|-------------------------------|-------------|----------|-------------|----------|
| Indene+H                      | 0.999107    | 0.999107 | 0.999107    | 0.999107 |
| Benzene+cycloprop-2-enylidene | 0.000435312 | 0.999543 | 0.000435312 | 0.999543 |
| PhCHCCH2+H                    | 0.000431584 | 0.999974 | 0.000431584 | 0.999974 |
| PhCCH+CH3                     | 7.75719e-06 | 0.999982 | 7.75719e-06 | 0.999982 |
| C2H2+PhCH2                    | 6.51326e-06 | 0.999988 | 6.51326e-06 | 0.999988 |
| PhCCCH3+H                     | 4.74360e-06 | 0.999993 | 4.74360e-06 | 0.999993 |
| Ph+MeAc                       | 4.20682e-06 | 0.999997 | 4.20682e-06 | 0.999997 |
| rad67                         | 1.22017e-06 | 0.999999 | 1.22017e-06 | 0.999999 |
| Benzene+cycloprop-1-enylidene | 5.88656e-07 | 0.999999 | 5.88656e-07 | 0.999999 |
| Ph+Allene                     | 5.31474e-07 | 1.000000 | 5.31474e-07 | 1.000000 |
| rad35                         | 5.19665e-07 | 1.000000 | 5.19665e-07 | 1.000000 |
| PhCH2CCH+H                    | 8.14215e-08 | 1.000000 | 8.14215e-08 | 1.000000 |
| PAH7+H                        | 5.71717e-08 | 1.000000 | 5.71717e-08 | 1.000000 |
| rad39                         | 1.60894e-08 | 1.000000 | 1.60894e-08 | 1.000000 |
| rad37                         | 1.59138e-08 | 1.000000 | 1.59138e-08 | 1.000000 |
| rad30                         | 1.00427e-08 | 1.000000 | 1.00427e-08 | 1.000000 |
| PAH9+H                        | 8.83301e-10 | 1.000000 | 8.83301e-10 | 1.000000 |
| rad38                         | 4.27984e-10 | 1.000000 | 4.27984e-10 | 1.000000 |
| PAH10+CH3                     | 7.44048e-11 | 1.000000 | 7.44048e-11 | 1.000000 |
| PhcycC3H3_A+H                 | 7.30900e-11 | 1.000000 | 7.30900e-11 | 1.000000 |
| rad60syn                      | 6.48407e-11 | 1.000000 | 6.48407e-11 | 1.000000 |
| PAH3+H                        | 4.28259e-11 | 1.000000 | 4.28259e-11 | 1.000000 |
| rad60anti                     | 3.28040e-11 | 1.000000 | 3.28040e-11 | 1.000000 |
| rad46                         | 2.83782e-11 | 1.000000 | 2.83782e-11 | 1.000000 |
| rad59                         | 8.18974e-12 | 1.000000 | 8.18974e-12 | 1.000000 |
| rad54                         | 2.70728e-12 | 1.000000 | 2.70728e-12 | 1.000000 |
| rad43                         | 2.46610e-12 | 1.000000 | 2.46610e-12 | 1.000000 |
| Phenyl+cycC3H4                | 1.23952e-12 | 1.000000 | 0.000000    | 1.000000 |
| PhcycC3H3_B+H                 | 1.09005e-12 | 1.000000 | 1.09005e-12 | 1.000000 |
| rad62                         | 5.51586e-13 | 1.000000 | 5.51586e-13 | 1.000000 |
| rad50                         | 3.90700e-13 | 1.000000 | 3.90700e-13 | 1.000000 |
| rad70                         | 8.95708e-14 | 1.000000 | 8.95708e-14 | 1.000000 |
| PAH1+H                        | 4.84545e-14 | 1.000000 | 4.84545e-14 | 1.000000 |
| rad55                         | 3.96080e-14 | 1.000000 | 3.96080e-14 | 1.000000 |
| rad52                         | 4.31279e-15 | 1.000000 | 4.31279e-15 | 1.000000 |
| rad58                         | 3.03881e-15 | 1.000000 | 3.03881e-15 | 1.000000 |
| rad34                         | 2.73087e-15 | 1.000000 | 2.73087e-15 | 1.000000 |
| rad51                         | 2.03107e-15 | 1.000000 | 2.03107e-15 | 1.000000 |
| rad41                         | 7.39638e-16 | 1.000000 | 7.39638e-16 | 1.000000 |
| rad42                         | 4.36203e-16 | 1.000000 | 4.36203e-16 | 1.000000 |
| rad65                         | 5.31796e-17 | 1.000000 | 5.31796e-17 | 1.000000 |
| rad53                         | 1.22797e-17 | 1.000000 | 1.22797e-17 | 1.000000 |
| rad64                         | 3.85188e-18 | 1.000000 | 3.85188e-18 | 1.000000 |
| rad61                         | 1.15688e-18 | 1.000000 | 1.15688e-18 | 1.000000 |
| rad56                         | 9.65553e-20 | 1.000000 | 9.65553e-20 | 1.000000 |
| rad68syn                      | 1.22760e-20 | 1.000000 | 1.22760e-20 | 1.000000 |
| rad68anti                     | 9.17629e-21 | 1.000000 | 9.17629e-21 | 1.000000 |
| rad40syn                      | 1.79832e-22 | 1.000000 | 1.79832e-22 | 1.000000 |
| rad40anti                     | 1.43402e-22 | 1.000000 | 1.43402e-22 | 1.000000 |
| PAH8+H                        | 3.45930e-23 | 1.000000 | 3.45930e-23 | 1.000000 |
| rad73                         | 7.15481e-24 | 1.000000 | 7.15481e-24 | 1.000000 |
| rad71                         | 7.13356e-26 | 1.000000 | 7.13356e-26 | 1.000000 |
| rad19anti                     | 7.31047e-30 | 1.000000 | 7.31047e-30 | 1.000000 |
| rad6                          | 6.81971e-31 | 1.000000 | 6.81971e-31 | 1.000000 |
| rad2                          | 9.94538e-32 | 1.000000 | 9.94538e-32 | 1.000000 |
| rad47                         | 1.18402e-32 | 1.000000 | 1.18402e-32 | 1.000000 |
| rad1                          | 7.07719e-33 | 1.000000 | 7.07719e-33 | 1.000000 |
| rad10                         | 5.19756e-33 | 1.000000 | 5.19756e-33 | 1.000000 |
| rad26                         | 3.18205e-33 | 1.000000 | 3.18205e-33 | 1.000000 |
| rad28                         | 9.05120e-34 | 1.000000 | 9.05120e-34 | 1.000000 |
| rad3                          | 6.57039e-34 | 1.000000 | 6.57039e-34 | 1.000000 |
| rad4                          | 3.42453e-34 | 1.000000 | 3.42453e-34 | 1.000000 |
| rad7                          | 5.11282e-35 | 1.000000 | 5.11282e-35 | 1.000000 |
| rad11                         | 1.24436e-35 | 1.000000 | 1.24436e-35 | 1.000000 |
| rad31                         | 1.15495e-35 | 1.000000 | 1.15495e-35 | 1.000000 |
| rad14                         | 2.76435e-36 | 1.000000 | 2.76435e-36 | 1.000000 |
| rad25                         | 1.85017e-36 | 1.000000 | 1.85017e-36 | 1.000000 |
| rad9                          | 7.73879e-37 | 1.000000 | 7.73879e-37 | 1.000000 |
| rad27                         | 4.59989e-37 | 1.000000 | 4.59989e-37 | 1.000000 |
| rad13                         | 2.90039e-37 | 1.000000 | 2.90039e-37 | 1.000000 |
| rad19syn                      | 1.76219e-38 | 1.000000 | 1.76219e-38 | 1.000000 |
| rad33                         | 6.63484e-40 | 1.000000 | 6.63484e-40 | 1.000000 |
| rad15                         | 3.46425e-40 | 1.000000 | 3.46425e-40 | 1.000000 |
| rad5                          | 3.42116e-40 | 1.000000 | 3.42116e-40 | 1.000000 |
| rad23                         | 6.62964e-41 | 1.000000 | 6.62964e-41 | 1.000000 |
| rad20                         | 1.87887e-42 | 1.000000 | 1.87887e-42 | 1.000000 |
| rad21                         | 1.78510e-42 | 1.000000 | 1.78510e-42 | 1.000000 |

|       |             |         |             |         |
|-------|-------------|---------|-------------|---------|
| rad12 | 1.74108e-42 | 1.00000 | 1.74108e-42 | 1.00000 |
| rad45 | 1.65957e-42 | 1.00000 | 1.65957e-42 | 1.00000 |
| rad36 | 1.05249e-43 | 1.00000 | 1.05249e-43 | 1.00000 |
| rad18 | 3.68046e-45 | 1.00000 | 3.68046e-45 | 1.00000 |
| rad22 | 3.11202e-46 | 1.00000 | 3.11202e-46 | 1.00000 |
| rad24 | 5.14930e-47 | 1.00000 | 5.14930e-47 | 1.00000 |
| rad8  | 2.45880e-63 | 1.00000 | 2.45880e-63 | 1.00000 |

0.100000000E-06 Pa, 260.000000 K

| Rate constant             | True (fraction)        | Effective (fraction)   |
|---------------------------|------------------------|------------------------|
| Total                     | 2.97464e-14 (1.00 )    | 2.97464e-14 (1.00 )    |
| Formation of rad19        | 2.97293e-14 (0.999 )   | 2.97293e-14 (0.999 )   |
| H-abstraction to cyc2enyl | 1.70236e-17 (0.000572) | 1.70236e-17 (0.000572) |
| H-abstraction to cyclenyl | 3.02186e-20 (1.02e-06) | 3.02186e-20 (1.02e-06) |

| species                       | PYtrue      | Cumul    | PYeffective | Cumul    |
|-------------------------------|-------------|----------|-------------|----------|
| Indene+H                      | 0.998946    | 0.998946 | 0.998946    | 0.998946 |
| Benzene+cycloprop-2-enylidene | 0.000572291 | 0.999518 | 0.000572291 | 0.999518 |
| PhCCCH2+H                     | 0.000453848 | 0.999972 | 0.000453848 | 0.999972 |
| PhCCH+CH3                     | 8.16530e-06 | 0.999980 | 8.16530e-06 | 0.999980 |
| C2H2+PhCH2                    | 6.95321e-06 | 0.999987 | 6.95321e-06 | 0.999987 |
| PhCCCH3+H                     | 5.02932e-06 | 0.999992 | 5.02932e-06 | 0.999992 |
| Ph+MeAc                       | 4.52059e-06 | 0.999997 | 4.52059e-06 | 0.999997 |
| rad67                         | 1.30786e-06 | 0.999998 | 1.30786e-06 | 0.999998 |
| Benzene+cycloprop-1-enylidene | 1.01588e-06 | 0.999999 | 1.01588e-06 | 0.999999 |
| Ph+Allene                     | 5.88618e-07 | 1.000000 | 5.88618e-07 | 1.000000 |
| rad35                         | 5.55458e-07 | 1.000000 | 5.55458e-07 | 1.000000 |
| PhCH2CCH+H                    | 9.17637e-08 | 1.000000 | 9.17637e-08 | 1.000000 |
| PAH7+H                        | 6.23016e-08 | 1.000000 | 6.23016e-08 | 1.000000 |
| rad39                         | 1.75209e-08 | 1.000000 | 1.75209e-08 | 1.000000 |
| rad37                         | 1.74317e-08 | 1.000000 | 1.74317e-08 | 1.000000 |
| rad30                         | 1.07732e-08 | 1.000000 | 1.07732e-08 | 1.000000 |
| PAH9+H                        | 9.70823e-10 | 1.000000 | 9.70823e-10 | 1.000000 |
| rad38                         | 4.76210e-10 | 1.000000 | 4.76210e-10 | 1.000000 |
| PhcycC3H3_A+H                 | 9.76900e-11 | 1.000000 | 9.76900e-11 | 1.000000 |
| PAH10+CH3                     | 8.98996e-11 | 1.000000 | 8.98996e-11 | 1.000000 |
| rad60syn                      | 7.17361e-11 | 1.000000 | 7.17361e-11 | 1.000000 |
| PAH3+H                        | 4.92719e-11 | 1.000000 | 4.92719e-11 | 1.000000 |
| rad60anti                     | 3.63918e-11 | 1.000000 | 3.63918e-11 | 1.000000 |
| rad46                         | 3.17862e-11 | 1.000000 | 3.17862e-11 | 1.000000 |
| rad59                         | 9.35934e-12 | 1.000000 | 9.35934e-12 | 1.000000 |
| rad54                         | 3.26922e-12 | 1.000000 | 3.26922e-12 | 1.000000 |
| rad43                         | 2.89822e-12 | 1.000000 | 2.89822e-12 | 1.000000 |
| Phenyl+cycC3H4                | 1.79997e-12 | 1.000000 | 0.000000    | 1.000000 |
| PhcycC3H3_B+H                 | 1.72357e-12 | 1.000000 | 1.72357e-12 | 1.000000 |
| rad62                         | 6.47858e-13 | 1.000000 | 6.47858e-13 | 1.000000 |
| rad50                         | 4.63657e-13 | 1.000000 | 4.63657e-13 | 1.000000 |
| rad70                         | 1.13462e-13 | 1.000000 | 1.13462e-13 | 1.000000 |
| PAH1+H                        | 6.48747e-14 | 1.000000 | 6.48747e-14 | 1.000000 |
| rad55                         | 5.01162e-14 | 1.000000 | 5.01162e-14 | 1.000000 |
| rad52                         | 5.33109e-15 | 1.000000 | 5.33109e-15 | 1.000000 |
| rad58                         | 3.93954e-15 | 1.000000 | 3.93954e-15 | 1.000000 |
| rad34                         | 3.67253e-15 | 1.000000 | 3.67253e-15 | 1.000000 |
| rad51                         | 2.62615e-15 | 1.000000 | 2.62615e-15 | 1.000000 |
| rad41                         | 1.01308e-15 | 1.000000 | 1.01308e-15 | 1.000000 |
| rad42                         | 5.82033e-16 | 1.000000 | 5.82033e-16 | 1.000000 |
| rad65                         | 6.97793e-17 | 1.000000 | 6.97793e-17 | 1.000000 |
| rad53                         | 1.97860e-17 | 1.000000 | 1.97860e-17 | 1.000000 |
| rad64                         | 6.46999e-18 | 1.000000 | 6.46999e-18 | 1.000000 |
| rad61                         | 2.22252e-18 | 1.000000 | 2.22252e-18 | 1.000000 |
| rad56                         | 1.96583e-19 | 1.000000 | 1.96583e-19 | 1.000000 |
| rad68syn                      | 2.54704e-20 | 1.000000 | 2.54704e-20 | 1.000000 |
| rad68anti                     | 1.89312e-20 | 1.000000 | 1.89312e-20 | 1.000000 |
| rad40syn                      | 4.46797e-22 | 1.000000 | 4.46797e-22 | 1.000000 |
| rad40anti                     | 3.55555e-22 | 1.000000 | 3.55555e-22 | 1.000000 |
| PAH8+H                        | 9.71820e-23 | 1.000000 | 9.71820e-23 | 1.000000 |
| rad73                         | 1.79367e-23 | 1.000000 | 1.79367e-23 | 1.000000 |
| rad71                         | 2.10958e-25 | 1.000000 | 2.10958e-25 | 1.000000 |
| rad19anti                     | 2.63449e-29 | 1.000000 | 2.63449e-29 | 1.000000 |
| rad6                          | 2.22049e-30 | 1.000000 | 2.22049e-30 | 1.000000 |
| rad2                          | 2.31229e-31 | 1.000000 | 2.31229e-31 | 1.000000 |
| rad1                          | 1.66578e-32 | 1.000000 | 1.66578e-32 | 1.000000 |
| rad47                         | 1.37151e-32 | 1.000000 | 1.37151e-32 | 1.000000 |
| rad10                         | 1.17491e-32 | 1.000000 | 1.17491e-32 | 1.000000 |
| rad26                         | 3.52542e-33 | 1.000000 | 3.52542e-33 | 1.000000 |
| rad3                          | 1.37837e-33 | 1.000000 | 1.37837e-33 | 1.000000 |
| rad28                         | 1.10270e-33 | 1.000000 | 1.10270e-33 | 1.000000 |

|          |             |         |             |         |
|----------|-------------|---------|-------------|---------|
| rad4     | 7.20902e-34 | 1.00000 | 7.20902e-34 | 1.00000 |
| rad7     | 1.66778e-34 | 1.00000 | 1.66778e-34 | 1.00000 |
| rad11    | 4.03399e-35 | 1.00000 | 4.03399e-35 | 1.00000 |
| rad31    | 3.40261e-35 | 1.00000 | 3.40261e-35 | 1.00000 |
| rad14    | 2.89792e-36 | 1.00000 | 2.89792e-36 | 1.00000 |
| rad25    | 1.98428e-36 | 1.00000 | 1.98428e-36 | 1.00000 |
| rad9     | 1.24893e-36 | 1.00000 | 1.24893e-36 | 1.00000 |
| rad13    | 9.48439e-37 | 1.00000 | 9.48439e-37 | 1.00000 |
| rad27    | 5.02558e-37 | 1.00000 | 5.02558e-37 | 1.00000 |
| rad19syn | 7.46104e-38 | 1.00000 | 7.46104e-38 | 1.00000 |
| rad33    | 1.90939e-39 | 1.00000 | 1.90939e-39 | 1.00000 |
| rad15    | 5.60399e-40 | 1.00000 | 5.60399e-40 | 1.00000 |
| rad23    | 3.33173e-40 | 1.00000 | 3.33173e-40 | 1.00000 |
| rad5     | 3.31615e-40 | 1.00000 | 3.31615e-40 | 1.00000 |
| rad45    | 9.10792e-42 | 1.00000 | 9.10792e-42 | 1.00000 |
| rad12    | 3.33072e-42 | 1.00000 | 3.33072e-42 | 1.00000 |
| rad20    | 2.47256e-42 | 1.00000 | 2.47256e-42 | 1.00000 |
| rad21    | 2.38342e-42 | 1.00000 | 2.38342e-42 | 1.00000 |
| rad36    | 5.81012e-43 | 1.00000 | 5.81012e-43 | 1.00000 |
| rad18    | 4.20073e-45 | 1.00000 | 4.20073e-45 | 1.00000 |
| rad22    | 1.26855e-45 | 1.00000 | 1.26855e-45 | 1.00000 |
| rad24    | 8.48333e-47 | 1.00000 | 8.48333e-47 | 1.00000 |
| rad8     | 4.68586e-63 | 1.00000 | 4.68586e-63 | 1.00000 |

0.100000000E-06 Pa, 270.000000 K

| Rate constant             | True (fraction)        | Effective (fraction)   |
|---------------------------|------------------------|------------------------|
| Total                     | 3.24655e-14 (1.00 )    | 3.24655e-14 (1.00 )    |
| Formation of rad19        | 3.24415e-14 (0.999 )   | 3.24415e-14 (0.999 )   |
| H-abstraction to cyc2enyl | 2.38790e-17 (0.000736) | 2.38790e-17 (0.000736) |
| H-abstraction to cyclenyl | 5.45397e-20 (1.68e-06) | 5.45397e-20 (1.68e-06) |

| species                       | PYtrue      | Cumul    | PYeffective | Cumul    |
|-------------------------------|-------------|----------|-------------|----------|
| Indene+H                      | 0.998755    | 0.998755 | 0.998755    | 0.998755 |
| Benzene+cycloprop-2-enylidene | 0.000735519 | 0.999491 | 0.000735519 | 0.999491 |
| PhCHCCH2+H                    | 0.000478146 | 0.999969 | 0.000478146 | 0.999969 |
| PhCCH+CH3                     | 8.60880e-06 | 0.999977 | 8.60880e-06 | 0.999977 |
| C2H2+PhCH2                    | 7.43973e-06 | 0.999985 | 7.43973e-06 | 0.999985 |
| PhCCCH3+H                     | 5.34286e-06 | 0.999990 | 5.34286e-06 | 0.999990 |
| Ph+MeAc                       | 4.86938e-06 | 0.999995 | 4.86938e-06 | 0.999995 |
| Benzene+cycloprop-1-enylidene | 1.67993e-06 | 0.999997 | 1.67993e-06 | 0.999997 |
| rad67                         | 1.40525e-06 | 0.999998 | 1.40525e-06 | 0.999998 |
| Ph+Allene                     | 6.54187e-07 | 0.999999 | 6.54187e-07 | 0.999999 |
| rad35                         | 5.95116e-07 | 0.999999 | 5.95116e-07 | 0.999999 |
| PhCH2CCH+H                    | 1.03828e-07 | 1.000000 | 1.03828e-07 | 1.000000 |
| PAH7+H                        | 6.80924e-08 | 1.000000 | 6.80924e-08 | 1.000000 |
| rad37                         | 1.91542e-08 | 1.000000 | 1.91542e-08 | 1.000000 |
| rad39                         | 1.91343e-08 | 1.000000 | 1.91343e-08 | 1.000000 |
| rad30                         | 1.15872e-08 | 1.000000 | 1.15872e-08 | 1.000000 |
| PAH9+H                        | 1.07084e-09 | 1.000000 | 1.07084e-09 | 1.000000 |
| rad38                         | 5.32069e-10 | 1.000000 | 5.32069e-10 | 1.000000 |
| PhcycC3H3_A+H                 | 1.30538e-10 | 1.000000 | 1.30538e-10 | 1.000000 |
| PAH10+CH3                     | 1.09134e-10 | 1.000000 | 1.09134e-10 | 1.000000 |
| rad60syn                      | 7.96566e-11 | 1.000000 | 7.96566e-11 | 1.000000 |
| PAH3+H                        | 5.69580e-11 | 1.000000 | 5.69580e-11 | 1.000000 |
| rad60anti                     | 4.05238e-11 | 1.000000 | 4.05238e-11 | 1.000000 |
| rad46                         | 3.57543e-11 | 1.000000 | 3.57543e-11 | 1.000000 |
| rad59                         | 1.07444e-11 | 1.000000 | 1.07444e-11 | 1.000000 |
| rad54                         | 3.96666e-12 | 1.000000 | 3.96666e-12 | 1.000000 |
| rad43                         | 3.41976e-12 | 1.000000 | 3.41976e-12 | 1.000000 |
| PhcycC3H3_B+H                 | 2.69151e-12 | 1.000000 | 2.69151e-12 | 1.000000 |
| Phenyl+cycC3H4                | 2.60320e-12 | 1.000000 | 0.000000    | 1.000000 |
| rad62                         | 7.63634e-13 | 1.000000 | 7.63634e-13 | 1.000000 |
| rad50                         | 5.53420e-13 | 1.000000 | 5.53420e-13 | 1.000000 |
| rad70                         | 1.44343e-13 | 1.000000 | 1.44343e-13 | 1.000000 |
| PAH1+H                        | 8.70739e-14 | 1.000000 | 8.70739e-14 | 1.000000 |
| rad55                         | 6.36740e-14 | 1.000000 | 6.36740e-14 | 1.000000 |
| rad52                         | 6.63065e-15 | 1.000000 | 6.63065e-15 | 1.000000 |
| rad58                         | 5.12944e-15 | 1.000000 | 5.12944e-15 | 1.000000 |
| rad34                         | 4.95119e-15 | 1.000000 | 4.95119e-15 | 1.000000 |
| rad51                         | 3.41605e-15 | 1.000000 | 3.41605e-15 | 1.000000 |
| rad41                         | 1.38732e-15 | 1.000000 | 1.38732e-15 | 1.000000 |
| rad42                         | 7.76679e-16 | 1.000000 | 7.76679e-16 | 1.000000 |
| rad65                         | 9.20538e-17 | 1.000000 | 9.20538e-17 | 1.000000 |
| rad53                         | 3.15550e-17 | 1.000000 | 3.15550e-17 | 1.000000 |
| rad64                         | 1.07030e-17 | 1.000000 | 1.07030e-17 | 1.000000 |
| rad61                         | 4.14942e-18 | 1.000000 | 4.14942e-18 | 1.000000 |
| rad56                         | 3.86758e-19 | 1.000000 | 3.86758e-19 | 1.000000 |

|           |             |          |             |          |
|-----------|-------------|----------|-------------|----------|
| rad68syn  | 5.09279e-20 | 1.000000 | 5.09279e-20 | 1.000000 |
| rad68anti | 3.76574e-20 | 1.000000 | 3.76574e-20 | 1.000000 |
| rad40syn  | 1.04541e-21 | 1.000000 | 1.04541e-21 | 1.000000 |
| rad40anti | 8.30243e-22 | 1.000000 | 8.30243e-22 | 1.000000 |
| PAH8+H    | 2.52772e-22 | 1.000000 | 2.52772e-22 | 1.000000 |
| rad73     | 4.24308e-23 | 1.000000 | 4.24308e-23 | 1.000000 |
| rad71     | 5.73649e-25 | 1.000000 | 5.73649e-25 | 1.000000 |
| rad19anti | 9.66950e-29 | 1.000000 | 9.66950e-29 | 1.000000 |
| rad6      | 7.70686e-30 | 1.000000 | 7.70686e-30 | 1.000000 |
| rad2      | 5.37407e-31 | 1.000000 | 5.37407e-31 | 1.000000 |
| rad1      | 3.92298e-32 | 1.000000 | 3.92298e-32 | 1.000000 |
| rad10     | 2.72747e-32 | 1.000000 | 2.72747e-32 | 1.000000 |
| rad47     | 1.61683e-32 | 1.000000 | 1.61683e-32 | 1.000000 |
| rad26     | 4.33214e-33 | 1.000000 | 4.33214e-33 | 1.000000 |
| rad3      | 2.95020e-33 | 1.000000 | 2.95020e-33 | 1.000000 |
| rad28     | 1.63057e-33 | 1.000000 | 1.63057e-33 | 1.000000 |
| rad4      | 1.54876e-33 | 1.000000 | 1.54876e-33 | 1.000000 |
| rad7      | 5.79789e-34 | 1.000000 | 5.79789e-34 | 1.000000 |
| rad11     | 1.39292e-34 | 1.000000 | 1.39292e-34 | 1.000000 |
| rad31     | 1.03174e-34 | 1.000000 | 1.03174e-34 | 1.000000 |
| rad13     | 3.30618e-36 | 1.000000 | 3.30618e-36 | 1.000000 |
| rad14     | 3.05576e-36 | 1.000000 | 3.05576e-36 | 1.000000 |
| rad25     | 2.14074e-36 | 1.000000 | 2.14074e-36 | 1.000000 |
| rad9      | 2.10565e-36 | 1.000000 | 2.10565e-36 | 1.000000 |
| rad27     | 5.54214e-37 | 1.000000 | 5.54214e-37 | 1.000000 |
| rad19syn  | 3.27847e-37 | 1.000000 | 3.27847e-37 | 1.000000 |
| rad33     | 6.25591e-39 | 1.000000 | 6.25591e-39 | 1.000000 |
| rad23     | 1.77185e-39 | 1.000000 | 1.77185e-39 | 1.000000 |
| rad15     | 9.47164e-40 | 1.000000 | 9.47164e-40 | 1.000000 |
| rad5      | 3.22007e-40 | 1.000000 | 3.22007e-40 | 1.000000 |
| rad45     | 5.12279e-41 | 1.000000 | 5.12279e-41 | 1.000000 |
| rad12     | 6.55844e-42 | 1.000000 | 6.55844e-42 | 1.000000 |
| rad20     | 3.30855e-42 | 1.000000 | 3.30855e-42 | 1.000000 |
| rad36     | 3.28910e-42 | 1.000000 | 3.28910e-42 | 1.000000 |
| rad21     | 3.23562e-42 | 1.000000 | 3.23562e-42 | 1.000000 |
| rad22     | 5.51784e-45 | 1.000000 | 5.51784e-45 | 1.000000 |
| rad18     | 4.88590e-45 | 1.000000 | 4.88590e-45 | 1.000000 |
| rad24     | 1.42931e-46 | 1.000000 | 1.42931e-46 | 1.000000 |
| rad8      | 9.13967e-63 | 1.000000 | 9.13967e-63 | 1.000000 |

0.100000000E-06 Pa, 280.000000 K

| Rate constant             | True (fraction)        | Effective (fraction)   |
|---------------------------|------------------------|------------------------|
| Total                     | 3.52572e-14 (1.00 )    | 3.52572e-14 (1.00 )    |
| Formation of rad19        | 3.52244e-14 (0.999 )   | 3.52244e-14 (0.999 )   |
| H-abstraction to cyc2enyl | 3.26639e-17 (0.000926) | 3.26639e-17 (0.000926) |
| H-abstraction to cyclenyl | 9.42926e-20 (2.67e-06) | 9.42926e-20 (2.67e-06) |

| species                       | PYtrue      | Cumul    | PYeffective | Cumul    |
|-------------------------------|-------------|----------|-------------|----------|
| Indene+H                      | 0.998535    | 0.998535 | 0.998535    | 0.998535 |
| Benzene+cycloprop-2-enylidene | 0.000926445 | 0.999462 | 0.000926445 | 0.999462 |
| PhCHCCH2+H                    | 0.000504654 | 0.999966 | 0.000504654 | 0.999966 |
| PhCCH+CH3                     | 9.09038e-06 | 0.999976 | 9.09038e-06 | 0.999976 |
| C2H2+PhCH2                    | 7.97755e-06 | 0.999984 | 7.97755e-06 | 0.999984 |
| PhCCCH3+H                     | 5.68676e-06 | 0.999989 | 5.68676e-06 | 0.999989 |
| Ph+MeAc                       | 5.25697e-06 | 0.999994 | 5.25697e-06 | 0.999994 |
| Benzene+cycloprop-1-enylidene | 2.67442e-06 | 0.999997 | 2.67442e-06 | 0.999997 |
| rad67                         | 1.51340e-06 | 0.999999 | 1.51340e-06 | 0.999999 |
| Ph+Allene                     | 7.29448e-07 | 0.999999 | 7.29448e-07 | 0.999999 |
| rad35                         | 6.39046e-07 | 1.00000  | 6.39046e-07 | 1.00000  |
| PhCH2CCH+H                    | 1.17909e-07 | 1.00000  | 1.17909e-07 | 1.00000  |
| PAH7+H                        | 7.46290e-08 | 1.00000  | 7.46290e-08 | 1.00000  |
| rad37                         | 2.11094e-08 | 1.00000  | 2.11094e-08 | 1.00000  |
| rad39                         | 2.09522e-08 | 1.00000  | 2.09522e-08 | 1.00000  |
| rad30                         | 1.24940e-08 | 1.00000  | 1.24940e-08 | 1.00000  |
| PAH9+H                        | 1.18522e-09 | 1.00000  | 1.18522e-09 | 1.00000  |
| rad38                         | 5.96837e-10 | 1.00000  | 5.96837e-10 | 1.00000  |
| PhcycC3H3_A+H                 | 1.74264e-10 | 1.00000  | 1.74264e-10 | 1.00000  |
| PAH10+CH3                     | 1.33029e-10 | 1.00000  | 1.33029e-10 | 1.00000  |
| rad60syn                      | 8.87606e-11 | 1.00000  | 8.87606e-11 | 1.00000  |
| PAH3+H                        | 6.61334e-11 | 1.00000  | 6.61334e-11 | 1.00000  |
| rad60anti                     | 4.52857e-11 | 1.00000  | 4.52857e-11 | 1.00000  |
| rad46                         | 4.03796e-11 | 1.00000  | 4.03796e-11 | 1.00000  |
| rad59                         | 1.23862e-11 | 1.00000  | 1.23862e-11 | 1.00000  |
| rad54                         | 4.83284e-12 | 1.00000  | 4.83284e-12 | 1.00000  |
| PhcycC3H3_B+H                 | 4.15199e-12 | 1.00000  | 4.15199e-12 | 1.00000  |
| rad43                         | 4.04946e-12 | 1.00000  | 4.04946e-12 | 1.00000  |
| Phenyl+cycC3H4                | 3.74742e-12 | 1.00000  | 0.00000     | 1.00000  |

|           |             |         |             |         |
|-----------|-------------|---------|-------------|---------|
| rad62     | 9.02853e-13 | 1.00000 | 9.02853e-13 | 1.00000 |
| rad50     | 6.64061e-13 | 1.00000 | 6.64061e-13 | 1.00000 |
| rad70     | 1.84259e-13 | 1.00000 | 1.84259e-13 | 1.00000 |
| PAH1+H    | 1.17039e-13 | 1.00000 | 1.17039e-13 | 1.00000 |
| rad55     | 8.11651e-14 | 1.00000 | 8.11651e-14 | 1.00000 |
| rad52     | 8.29198e-15 | 1.00000 | 8.29198e-15 | 1.00000 |
| rad58     | 6.70136e-15 | 1.00000 | 6.70136e-15 | 1.00000 |
| rad34     | 6.68467e-15 | 1.00000 | 6.68467e-15 | 1.00000 |
| rad51     | 4.46577e-15 | 1.00000 | 4.46577e-15 | 1.00000 |
| rad41     | 1.89783e-15 | 1.00000 | 1.89783e-15 | 1.00000 |
| rad42     | 1.03572e-15 | 1.00000 | 1.03572e-15 | 1.00000 |
| rad65     | 1.21961e-16 | 1.00000 | 1.21961e-16 | 1.00000 |
| rad53     | 4.97919e-17 | 1.00000 | 4.97919e-17 | 1.00000 |
| rad64     | 1.74396e-17 | 1.00000 | 1.74396e-17 | 1.00000 |
| rad61     | 7.53772e-18 | 1.00000 | 7.53772e-18 | 1.00000 |
| rad56     | 7.36384e-19 | 1.00000 | 7.36384e-19 | 1.00000 |
| rad68syn  | 9.83169e-20 | 1.00000 | 9.83169e-20 | 1.00000 |
| rad68anti | 7.23595e-20 | 1.00000 | 7.23595e-20 | 1.00000 |
| rad40syn  | 2.31284e-21 | 1.00000 | 2.31284e-21 | 1.00000 |
| rad40anti | 1.83329e-21 | 1.00000 | 1.83329e-21 | 1.00000 |
| PAH8+H    | 6.12419e-22 | 1.00000 | 6.12419e-22 | 1.00000 |
| rad73     | 9.50003e-23 | 1.00000 | 9.50003e-23 | 1.00000 |
| rad71     | 1.44434e-24 | 1.00000 | 1.44434e-24 | 1.00000 |
| rad19anti | 3.59338e-28 | 1.00000 | 3.59338e-28 | 1.00000 |
| rad6      | 2.76090e-29 | 1.00000 | 2.76090e-29 | 1.00000 |
| rad2      | 1.27849e-30 | 1.00000 | 1.27849e-30 | 1.00000 |
| rad1      | 9.46598e-32 | 1.00000 | 9.46598e-32 | 1.00000 |
| rad10     | 6.56817e-32 | 1.00000 | 6.56817e-32 | 1.00000 |
| rad47     | 1.94125e-32 | 1.00000 | 1.94125e-32 | 1.00000 |
| rad3      | 6.29387e-33 | 1.00000 | 6.29387e-33 | 1.00000 |
| rad26     | 6.08891e-33 | 1.00000 | 6.08891e-33 | 1.00000 |
| rad4      | 3.31736e-33 | 1.00000 | 3.31736e-33 | 1.00000 |
| rad28     | 2.98720e-33 | 1.00000 | 2.98720e-33 | 1.00000 |
| rad7      | 2.07980e-33 | 1.00000 | 2.07980e-33 | 1.00000 |
| rad11     | 4.95919e-34 | 1.00000 | 4.95919e-34 | 1.00000 |
| rad31     | 3.20736e-34 | 1.00000 | 3.20736e-34 | 1.00000 |
| rad13     | 1.18956e-35 | 1.00000 | 1.18956e-35 | 1.00000 |
| rad9      | 3.80269e-36 | 1.00000 | 3.80269e-36 | 1.00000 |
| rad14     | 3.24356e-36 | 1.00000 | 3.24356e-36 | 1.00000 |
| rad25     | 2.32380e-36 | 1.00000 | 2.32380e-36 | 1.00000 |
| rad19syn  | 1.48909e-36 | 1.00000 | 1.48909e-36 | 1.00000 |
| rad27     | 6.18629e-37 | 1.00000 | 6.18629e-37 | 1.00000 |
| rad33     | 2.18071e-38 | 1.00000 | 2.18071e-38 | 1.00000 |
| rad23     | 9.90996e-39 | 1.00000 | 9.90996e-39 | 1.00000 |
| rad15     | 1.71508e-39 | 1.00000 | 1.71508e-39 | 1.00000 |
| rad45     | 3.31845e-40 | 1.00000 | 3.31845e-40 | 1.00000 |
| rad5      | 3.13211e-40 | 1.00000 | 3.13211e-40 | 1.00000 |
| rad36     | 2.14572e-41 | 1.00000 | 2.14572e-41 | 1.00000 |
| rad12     | 1.33023e-41 | 1.00000 | 1.33023e-41 | 1.00000 |
| rad20     | 4.53180e-42 | 1.00000 | 4.53180e-42 | 1.00000 |
| rad21     | 4.48980e-42 | 1.00000 | 4.48980e-42 | 1.00000 |
| rad22     | 2.52325e-44 | 1.00000 | 2.52325e-44 | 1.00000 |
| rad18     | 5.94279e-45 | 1.00000 | 5.94279e-45 | 1.00000 |
| rad24     | 2.46489e-46 | 1.00000 | 2.46489e-46 | 1.00000 |
| rad8      | 1.82566e-62 | 1.00000 | 1.82566e-62 | 1.00000 |

0.100000000E-06 Pa, 290.000000 K

=====

| Rate constant             | True (fraction)        | Effective (fraction)   |
|---------------------------|------------------------|------------------------|
| Total                     | 3.81171e-14 (1.00 )    | 3.81171e-14 (1.00 )    |
| Formation of rad19        | 3.80733e-14 (0.999 )   | 3.80733e-14 (0.999 )   |
| H-abstraction to cyc2enyl | 4.36868e-17 (0.00115 ) | 4.36868e-17 (0.00115 ) |
| H-abstraction to cyclenyl | 1.56861e-19 (4.12e-06) | 1.56861e-19 (4.12e-06) |

| species                       | PYtrue      | Cumul    | PYeffective | Cumul    |
|-------------------------------|-------------|----------|-------------|----------|
| Indene+H                      | 0.998282    | 0.998282 | 0.998282    | 0.998282 |
| Benzene+cycloprop-2-enylidene | 0.00114612  | 0.999429 | 0.00114612  | 0.999429 |
| PhCHCCH2+H                    | 0.000533552 | 0.999962 | 0.000533552 | 0.999962 |
| PhCCH+CH3                     | 9.61277e-06 | 0.999972 | 9.61277e-06 | 0.999972 |
| C2H2+PhCH2                    | 8.57172e-06 | 0.999980 | 8.57172e-06 | 0.999980 |
| PhCCCH3+H                     | 6.06370e-06 | 0.999986 | 6.06370e-06 | 0.999986 |
| Ph+MeAc                       | 5.68749e-06 | 0.999992 | 5.68749e-06 | 0.999992 |
| Benzene+cycloprop-1-enylidene | 4.11523e-06 | 0.999996 | 4.11523e-06 | 0.999996 |
| rad67                         | 1.63346e-06 | 0.999998 | 1.63346e-06 | 0.999998 |
| Ph+Allene                     | 8.15840e-07 | 0.999999 | 8.15840e-07 | 0.999999 |
| rad35                         | 6.87689e-07 | 0.999999 | 6.87689e-07 | 0.999999 |
| PhCH2CCH+H                    | 1.34349e-07 | 0.999999 | 1.34349e-07 | 0.999999 |
| PAH7+H                        | 8.20060e-08 | 0.999999 | 8.20060e-08 | 0.999999 |

|                |             |          |             |          |
|----------------|-------------|----------|-------------|----------|
| rad37          | 2.33285e-08 | 1.000000 | 2.33285e-08 | 1.000000 |
| rad39          | 2.30001e-08 | 1.000000 | 2.30001e-08 | 1.000000 |
| rad30          | 1.35042e-08 | 1.000000 | 1.35042e-08 | 1.000000 |
| PAH9+H         | 1.31607e-09 | 1.000000 | 1.31607e-09 | 1.000000 |
| rad38          | 6.71988e-10 | 1.000000 | 6.71988e-10 | 1.000000 |
| PhcycC3H3_A+H  | 2.32248e-10 | 1.000000 | 2.32248e-10 | 1.000000 |
| PAH10+CH3      | 1.62717e-10 | 1.000000 | 1.62717e-10 | 1.000000 |
| rad60syn       | 9.92285e-11 | 1.000000 | 9.92285e-11 | 1.000000 |
| PAH3+H         | 7.70956e-11 | 1.000000 | 7.70956e-11 | 1.000000 |
| rad60anti      | 5.07758e-11 | 1.000000 | 5.07758e-11 | 1.000000 |
| rad46          | 4.57748e-11 | 1.000000 | 4.57748e-11 | 1.000000 |
| rad59          | 1.43338e-11 | 1.000000 | 1.43338e-11 | 1.000000 |
| PhcycC3H3_B+H  | 6.32701e-12 | 1.000000 | 6.32701e-12 | 1.000000 |
| rad54          | 5.90859e-12 | 1.000000 | 5.90859e-12 | 1.000000 |
| Phenyl+cycC3H4 | 5.36584e-12 | 1.000000 | 0.00000     | 1.000000 |
| rad43          | 4.80969e-12 | 1.000000 | 4.80969e-12 | 1.000000 |
| rad62          | 1.07018e-12 | 1.000000 | 1.07018e-12 | 1.000000 |
| rad50          | 8.00597e-13 | 1.000000 | 8.00597e-13 | 1.000000 |
| rad70          | 2.35807e-13 | 1.000000 | 2.35807e-13 | 1.000000 |
| PAH1+H         | 1.57377e-13 | 1.000000 | 1.57377e-13 | 1.000000 |
| rad55          | 1.03709e-13 | 1.000000 | 1.03709e-13 | 1.000000 |
| rad52          | 1.04176e-14 | 1.000000 | 1.04176e-14 | 1.000000 |
| rad34          | 9.02825e-15 | 1.000000 | 9.02825e-15 | 1.000000 |
| rad58          | 8.77577e-15 | 1.000000 | 8.77577e-15 | 1.000000 |
| rad51          | 5.86071e-15 | 1.000000 | 5.86071e-15 | 1.000000 |
| rad41          | 2.59126e-15 | 1.000000 | 2.59126e-15 | 1.000000 |
| rad42          | 1.37914e-15 | 1.000000 | 1.37914e-15 | 1.000000 |
| rad65          | 1.62088e-16 | 1.000000 | 1.62088e-16 | 1.000000 |
| rad53          | 7.76876e-17 | 1.000000 | 7.76876e-17 | 1.000000 |
| rad64          | 2.79837e-17 | 1.000000 | 2.79837e-17 | 1.000000 |
| rad61          | 1.33318e-17 | 1.000000 | 1.33318e-17 | 1.000000 |
| rad56          | 1.35816e-18 | 1.000000 | 1.35816e-18 | 1.000000 |
| rad68syn       | 1.83484e-19 | 1.000000 | 1.83484e-19 | 1.000000 |
| rad68anti      | 1.34481e-19 | 1.000000 | 1.34481e-19 | 1.000000 |
| rad40syn       | 4.85494e-21 | 1.000000 | 4.85494e-21 | 1.000000 |
| rad40anti      | 3.84148e-21 | 1.000000 | 3.84148e-21 | 1.000000 |
| PAH8+H         | 1.38965e-21 | 1.000000 | 1.38965e-21 | 1.000000 |
| rad73          | 2.01863e-22 | 1.000000 | 2.01863e-22 | 1.000000 |
| rad71          | 3.38824e-24 | 1.000000 | 3.38824e-24 | 1.000000 |
| rad19anti      | 1.34354e-27 | 1.000000 | 1.34354e-27 | 1.000000 |
| rad6           | 9.97126e-29 | 1.000000 | 9.97126e-29 | 1.000000 |
| rad2           | 3.22247e-30 | 1.000000 | 3.22247e-30 | 1.000000 |
| rad1           | 2.42240e-31 | 1.000000 | 2.42240e-31 | 1.000000 |
| rad10          | 1.62917e-31 | 1.000000 | 1.62917e-31 | 1.000000 |
| rad47          | 2.37555e-32 | 1.000000 | 2.37555e-32 | 1.000000 |
| rad3           | 1.46614e-32 | 1.000000 | 1.46614e-32 | 1.000000 |
| rad26          | 9.85261e-33 | 1.000000 | 9.85261e-33 | 1.000000 |
| rad4           | 7.76117e-33 | 1.000000 | 7.76117e-33 | 1.000000 |
| rad7           | 7.51847e-33 | 1.000000 | 7.51847e-33 | 1.000000 |
| rad28          | 6.46102e-33 | 1.000000 | 6.46102e-33 | 1.000000 |
| rad11          | 1.77767e-33 | 1.000000 | 1.77767e-33 | 1.000000 |
| rad31          | 1.01787e-33 | 1.000000 | 1.01787e-33 | 1.000000 |
| rad13          | 4.31465e-35 | 1.000000 | 4.31465e-35 | 1.000000 |
| rad9           | 7.67595e-36 | 1.000000 | 7.67595e-36 | 1.000000 |
| rad19syn       | 6.95957e-36 | 1.000000 | 6.95957e-36 | 1.000000 |
| rad14          | 3.47059e-36 | 1.000000 | 3.47059e-36 | 1.000000 |
| rad25          | 2.53911e-36 | 1.000000 | 2.53911e-36 | 1.000000 |
| rad27          | 7.02605e-37 | 1.000000 | 7.02605e-37 | 1.000000 |
| rad33          | 7.74918e-38 | 1.000000 | 7.74918e-38 | 1.000000 |
| rad23          | 5.78684e-38 | 1.000000 | 5.78684e-38 | 1.000000 |
| rad15          | 3.47192e-39 | 1.000000 | 3.47192e-39 | 1.000000 |
| rad45          | 2.11239e-39 | 1.000000 | 2.11239e-39 | 1.000000 |
| rad5           | 3.05159e-40 | 1.000000 | 3.05159e-40 | 1.000000 |
| rad36          | 1.37640e-40 | 1.000000 | 1.37640e-40 | 1.000000 |
| rad12          | 2.78138e-41 | 1.000000 | 2.78138e-41 | 1.000000 |
| rad20          | 6.45502e-42 | 1.000000 | 6.45502e-42 | 1.000000 |
| rad21          | 6.44674e-42 | 1.000000 | 6.44674e-42 | 1.000000 |
| rad22          | 1.20240e-43 | 1.000000 | 1.20240e-43 | 1.000000 |
| rad18          | 8.06848e-45 | 1.000000 | 8.06848e-45 | 1.000000 |
| rad24          | 4.35652e-46 | 1.000000 | 4.35652e-46 | 1.000000 |
| rad8           | 3.73727e-62 | 1.000000 | 3.73727e-62 | 1.000000 |

0.100000000E-06 Pa, 300.00000 K

=====

| Rate constant             | True (fraction)        | Effective (fraction)   |
|---------------------------|------------------------|------------------------|
| Total                     | 5.34809e-14 (1.00 )    | 5.34809e-14 (1.00 )    |
| Formation of rad19        | 5.34010e-14 (0.999 )   | 5.34010e-14 (0.999 )   |
| H-abstraction to cyc2enyl | 7.95823e-17 (0.00149 ) | 7.95823e-17 (0.00149 ) |
| H-abstraction to cyclenyl | 3.44981e-19 (6.45e-06) | 3.44981e-19 (6.45e-06) |



| species                       | PYtrue      | Cumul    | PYeffective | Cumul    |
|-------------------------------|-------------|----------|-------------|----------|
| Indene+H                      | 0.997939    | 0.997939 | 0.997939    | 0.997939 |
| Benzene+cycloprop-2-enylidene | 0.00148805  | 0.999427 | 0.00148805  | 0.999427 |
| PhCCH2+H                      | 0.000529814 | 0.999957 | 0.000529814 | 0.999957 |
| PhCCH+CH3                     | 1.04615e-05 | 0.999968 | 1.04615e-05 | 0.999968 |
| C2H2+PhCH2                    | 9.96265e-06 | 0.999978 | 9.96265e-06 | 0.999978 |
| Benzene+cycloprop-1-enylidene | 6.45054e-06 | 0.999984 | 6.45054e-06 | 0.999984 |
| PhCCCH3+H                     | 6.36715e-06 | 0.999990 | 6.36715e-06 | 0.999990 |
| Ph+MeAc                       | 5.99826e-06 | 0.999996 | 5.99826e-06 | 0.999996 |
| rad67                         | 1.76909e-06 | 0.999998 | 1.76909e-06 | 0.999998 |
| Ph+Allene                     | 8.18996e-07 | 0.999999 | 8.18996e-07 | 0.999999 |
| rad35                         | 7.31807e-07 | 1.000000 | 7.31807e-07 | 1.000000 |
| PhCH2CCH+H                    | 1.62469e-07 | 1.000000 | 1.62469e-07 | 1.000000 |
| PAH7+H                        | 1.00667e-07 | 1.000000 | 1.00667e-07 | 1.000000 |
| rad37                         | 2.83206e-08 | 1.000000 | 2.83206e-08 | 1.000000 |
| rad39                         | 2.48351e-08 | 1.000000 | 2.48351e-08 | 1.000000 |
| rad30                         | 1.39398e-08 | 1.000000 | 1.39398e-08 | 1.000000 |
| PAH9+H                        | 1.67898e-09 | 1.000000 | 1.67898e-09 | 1.000000 |
| rad38                         | 7.72652e-10 | 1.000000 | 7.72652e-10 | 1.000000 |
| PhcycC3H3_A+H                 | 3.25290e-10 | 1.000000 | 3.25290e-10 | 1.000000 |
| PAH10+CH3                     | 2.37266e-10 | 1.000000 | 2.37266e-10 | 1.000000 |
| rad60syn                      | 1.06834e-10 | 1.000000 | 1.06834e-10 | 1.000000 |
| PAH3+H                        | 9.84715e-11 | 1.000000 | 9.84715e-11 | 1.000000 |
| rad60anti                     | 5.51572e-11 | 1.000000 | 5.51572e-11 | 1.000000 |
| rad46                         | 5.45644e-11 | 1.000000 | 5.45644e-11 | 1.000000 |
| rad59                         | 1.67258e-11 | 1.000000 | 1.67258e-11 | 1.000000 |
| PhcycC3H3_B+H                 | 1.05896e-11 | 1.000000 | 1.05896e-11 | 1.000000 |
| Phenyl+cycC3H4                | 8.20984e-12 | 1.000000 | 0.000000    | 1.000000 |
| rad54                         | 7.66783e-12 | 1.000000 | 7.66783e-12 | 1.000000 |
| rad43                         | 5.65558e-12 | 1.000000 | 5.65558e-12 | 1.000000 |
| rad62                         | 1.25276e-12 | 1.000000 | 1.25276e-12 | 1.000000 |
| rad50                         | 1.03316e-12 | 1.000000 | 1.03316e-12 | 1.000000 |
| rad70                         | 3.13392e-13 | 1.000000 | 3.13392e-13 | 1.000000 |
| PAH1+H                        | 1.93779e-13 | 1.000000 | 1.93779e-13 | 1.000000 |
| rad55                         | 1.33843e-13 | 1.000000 | 1.33843e-13 | 1.000000 |
| rad52                         | 1.45721e-14 | 1.000000 | 1.45721e-14 | 1.000000 |
| rad34                         | 1.28521e-14 | 1.000000 | 1.28521e-14 | 1.000000 |
| rad58                         | 1.11204e-14 | 1.000000 | 1.11204e-14 | 1.000000 |
| rad51                         | 8.23952e-15 | 1.000000 | 8.23952e-15 | 1.000000 |
| rad41                         | 3.58185e-15 | 1.000000 | 3.58185e-15 | 1.000000 |
| rad42                         | 1.81926e-15 | 1.000000 | 1.81926e-15 | 1.000000 |
| rad65                         | 2.32648e-16 | 1.000000 | 2.32648e-16 | 1.000000 |
| rad53                         | 1.29481e-16 | 1.000000 | 1.29481e-16 | 1.000000 |
| rad64                         | 4.98973e-17 | 1.000000 | 4.98973e-17 | 1.000000 |
| rad61                         | 2.74862e-17 | 1.000000 | 2.74862e-17 | 1.000000 |
| rad56                         | 3.01521e-18 | 1.000000 | 3.01521e-18 | 1.000000 |
| rad68syn                      | 3.96643e-19 | 1.000000 | 3.96643e-19 | 1.000000 |
| rad68anti                     | 2.85688e-19 | 1.000000 | 2.85688e-19 | 1.000000 |
| rad40syn                      | 1.34588e-20 | 1.000000 | 1.34588e-20 | 1.000000 |
| rad40anti                     | 1.02810e-20 | 1.000000 | 1.02810e-20 | 1.000000 |
| PAH8+H                        | 5.53972e-21 | 1.000000 | 5.53972e-21 | 1.000000 |
| rad73                         | 6.54843e-22 | 1.000000 | 6.54843e-22 | 1.000000 |
| rad71                         | 2.13406e-23 | 1.000000 | 2.13406e-23 | 1.000000 |
| rad19anti                     | 1.46846e-23 | 1.000000 | 1.46846e-23 | 1.000000 |
| rad2                          | 8.86932e-26 | 1.000000 | 8.86932e-26 | 1.000000 |
| rad6                          | 8.80437e-26 | 1.000000 | 8.80437e-26 | 1.000000 |
| rad1                          | 6.68293e-27 | 1.000000 | 6.68293e-27 | 1.000000 |
| rad10                         | 5.15304e-27 | 1.000000 | 5.15304e-27 | 1.000000 |
| rad3                          | 1.32361e-27 | 1.000000 | 1.32361e-27 | 1.000000 |
| rad26                         | 9.29241e-28 | 1.000000 | 9.29241e-28 | 1.000000 |
| rad4                          | 6.58233e-28 | 1.000000 | 6.58233e-28 | 1.000000 |
| rad9                          | 4.44716e-28 | 1.000000 | 4.44716e-28 | 1.000000 |
| rad28                         | 1.49242e-28 | 1.000000 | 1.49242e-28 | 1.000000 |
| rad23                         | 1.59577e-29 | 1.000000 | 1.59577e-29 | 1.000000 |
| rad31                         | 9.66297e-30 | 1.000000 | 9.66297e-30 | 1.000000 |
| rad7                          | 7.74701e-30 | 1.000000 | 7.74701e-30 | 1.000000 |
| rad72                         | 4.67174e-30 | 1.000000 | 4.67174e-30 | 1.000000 |
| rad11                         | 1.83732e-30 | 1.000000 | 1.83732e-30 | 1.000000 |
| rad45                         | 1.33547e-30 | 1.000000 | 1.33547e-30 | 1.000000 |
| rad19syn                      | 1.12386e-30 | 1.000000 | 1.12386e-30 | 1.000000 |
| rad25                         | 3.61943e-31 | 1.000000 | 3.61943e-31 | 1.000000 |
| rad14                         | 2.58170e-31 | 1.000000 | 2.58170e-31 | 1.000000 |
| rad15                         | 2.57881e-31 | 1.000000 | 2.57881e-31 | 1.000000 |
| rad47                         | 1.77284e-31 | 1.000000 | 1.77284e-31 | 1.000000 |
| rad27                         | 1.46073e-31 | 1.000000 | 1.46073e-31 | 1.000000 |
| rad36                         | 4.55141e-32 | 1.000000 | 4.55141e-32 | 1.000000 |
| rad13                         | 4.51109e-32 | 1.000000 | 4.51109e-32 | 1.000000 |
| rad12                         | 9.82801e-33 | 1.000000 | 9.82801e-33 | 1.000000 |

|       |             |         |             |         |
|-------|-------------|---------|-------------|---------|
| rad33 | 1.34748e-33 | 1.00000 | 1.34748e-33 | 1.00000 |
| rad5  | 6.27802e-34 | 1.00000 | 6.27802e-34 | 1.00000 |
| rad21 | 1.07596e-34 | 1.00000 | 1.07596e-34 | 1.00000 |
| rad20 | 6.33118e-35 | 1.00000 | 6.33118e-35 | 1.00000 |
| rad22 | 1.77140e-35 | 1.00000 | 1.77140e-35 | 1.00000 |
| rad18 | 1.20178e-36 | 1.00000 | 1.20178e-36 | 1.00000 |
| rad24 | 4.91751e-38 | 1.00000 | 4.91751e-38 | 1.00000 |
| rad8  | 3.04177e-48 | 1.00000 | 3.04177e-48 | 1.00000 |

0.100000000E-06 Pa, 310.000000 K

| Rate constant             | True (fraction)        | Effective (fraction)   |
|---------------------------|------------------------|------------------------|
| Total                     | 5.92544e-14 (1.00 )    | 5.92544e-14 (1.00 )    |
| Formation of rad19        | 5.91462e-14 (0.998 )   | 5.91462e-14 (0.998 )   |
| H-abstraction to cyc2enyl | 1.07628e-16 (0.00182 ) | 1.07628e-16 (0.00182 ) |
| H-abstraction to cyclenyl | 5.62537e-19 (9.49e-06) | 5.62537e-19 (9.49e-06) |

| species                       | PYtrue      | Cumul    | PYeffective | Cumul    |
|-------------------------------|-------------|----------|-------------|----------|
| Indene+H                      | 0.997536    | 0.997536 | 0.997536    | 0.997536 |
| Benzene+cycloprop-2-enylidene | 0.00181637  | 0.999353 | 0.00181637  | 0.999353 |
| PhCHCCH2+H                    | 0.000599213 | 0.999952 | 0.000599213 | 0.999952 |
| PhCCH+CH3                     | 1.07899e-05 | 0.999963 | 1.07899e-05 | 0.999963 |
| C2H2+PhCH2                    | 9.94973e-06 | 0.999973 | 9.94973e-06 | 0.999973 |
| Benzene+cycloprop-1-enylidene | 9.49359e-06 | 0.999982 | 9.49359e-06 | 0.999982 |
| PhCCH3+H                      | 6.92725e-06 | 0.999989 | 6.92725e-06 | 0.999989 |
| Ph+MeAc                       | 6.69436e-06 | 0.999996 | 6.69436e-06 | 0.999996 |
| rad67                         | 1.91404e-06 | 0.999998 | 1.91404e-06 | 0.999998 |
| Ph+Allene                     | 1.02854e-06 | 0.999999 | 1.02854e-06 | 0.999999 |
| rad35                         | 8.00939e-07 | 0.999999 | 8.00939e-07 | 0.999999 |
| PhCH2CCH+H                    | 1.75897e-07 | 1.000000 | 1.75897e-07 | 1.000000 |
| PAH7+H                        | 9.96917e-08 | 1.000000 | 9.96917e-08 | 1.000000 |
| rad37                         | 2.86985e-08 | 1.000000 | 2.86985e-08 | 1.000000 |
| rad39                         | 2.78945e-08 | 1.000000 | 2.78945e-08 | 1.000000 |
| rad30                         | 1.58794e-08 | 1.000000 | 1.58794e-08 | 1.000000 |
| PAH9+H                        | 1.63685e-09 | 1.000000 | 1.63685e-09 | 1.000000 |
| rad38                         | 8.60336e-10 | 1.000000 | 8.60336e-10 | 1.000000 |
| PhcycC3H3_A+H                 | 4.09102e-10 | 1.000000 | 4.09102e-10 | 1.000000 |
| PAH10+CH3                     | 2.45221e-10 | 1.000000 | 2.45221e-10 | 1.000000 |
| rad60syn                      | 1.25085e-10 | 1.000000 | 1.25085e-10 | 1.000000 |
| PAH3+H                        | 1.05828e-10 | 1.000000 | 1.05828e-10 | 1.000000 |
| rad60anti                     | 6.43937e-11 | 1.000000 | 6.43937e-11 | 1.000000 |
| rad46                         | 5.94068e-11 | 1.000000 | 5.94068e-11 | 1.000000 |
| rad59                         | 1.93817e-11 | 1.000000 | 1.93817e-11 | 1.000000 |
| PhcycC3H3_B+H                 | 1.41415e-11 | 1.000000 | 1.41415e-11 | 1.000000 |
| Phenyl+cycC3H4                | 1.07882e-11 | 1.000000 | 0.000000    | 1.000000 |
| rad54                         | 8.89606e-12 | 1.000000 | 8.89606e-12 | 1.000000 |
| rad43                         | 6.83075e-12 | 1.000000 | 6.83075e-12 | 1.000000 |
| rad62                         | 1.51159e-12 | 1.000000 | 1.51159e-12 | 1.000000 |
| rad50                         | 1.17696e-12 | 1.000000 | 1.17696e-12 | 1.000000 |
| rad70                         | 3.87563e-13 | 1.000000 | 3.87563e-13 | 1.000000 |
| PAH1+H                        | 2.83537e-13 | 1.000000 | 2.83537e-13 | 1.000000 |
| rad55                         | 1.69858e-13 | 1.000000 | 1.69858e-13 | 1.000000 |
| rad52                         | 1.66060e-14 | 1.000000 | 1.66060e-14 | 1.000000 |
| rad34                         | 1.64058e-14 | 1.000000 | 1.64058e-14 | 1.000000 |
| rad58                         | 1.50872e-14 | 1.000000 | 1.50872e-14 | 1.000000 |
| rad51                         | 1.01582e-14 | 1.000000 | 1.01582e-14 | 1.000000 |
| rad41                         | 4.78440e-15 | 1.000000 | 4.78440e-15 | 1.000000 |
| rad42                         | 2.42635e-15 | 1.000000 | 2.42635e-15 | 1.000000 |
| rad65                         | 2.87409e-16 | 1.000000 | 2.87409e-16 | 1.000000 |
| rad53                         | 1.82136e-16 | 1.000000 | 1.82136e-16 | 1.000000 |
| rad64                         | 6.86553e-17 | 1.000000 | 6.86553e-17 | 1.000000 |
| rad61                         | 3.85257e-17 | 1.000000 | 3.85257e-17 | 1.000000 |
| rad56                         | 4.20810e-18 | 1.000000 | 4.20810e-18 | 1.000000 |
| rad68syn                      | 5.79184e-19 | 1.000000 | 5.79184e-19 | 1.000000 |
| rad68anti                     | 4.21603e-19 | 1.000000 | 4.21603e-19 | 1.000000 |
| rad40syn                      | 1.84909e-20 | 1.000000 | 1.84909e-20 | 1.000000 |
| rad40anti                     | 1.45861e-20 | 1.000000 | 1.45861e-20 | 1.000000 |
| PAH8+H                        | 5.99119e-21 | 1.000000 | 5.99119e-21 | 1.000000 |
| rad73                         | 7.86975e-22 | 1.000000 | 7.86975e-22 | 1.000000 |
| rad71                         | 1.54165e-23 | 1.000000 | 1.54165e-23 | 1.000000 |
| rad19anti                     | 1.86169e-26 | 1.000000 | 1.86169e-26 | 1.000000 |
| rad6                          | 1.25389e-27 | 1.000000 | 1.25389e-27 | 1.000000 |
| rad2                          | 2.13491e-29 | 1.000000 | 2.13491e-29 | 1.000000 |
| rad1                          | 1.65949e-30 | 1.000000 | 1.65949e-30 | 1.000000 |
| rad10                         | 1.06193e-30 | 1.000000 | 1.06193e-30 | 1.000000 |
| rad7                          | 9.45679e-32 | 1.000000 | 9.45679e-32 | 1.000000 |
| rad3                          | 8.23232e-32 | 1.000000 | 8.23232e-32 | 1.000000 |
| rad4                          | 4.39965e-32 | 1.000000 | 4.39965e-32 | 1.000000 |

|          |             |          |             |          |
|----------|-------------|----------|-------------|----------|
| rad28    | 3.78970e-32 | 1.000000 | 3.78970e-32 | 1.000000 |
| rad47    | 3.77537e-32 | 1.000000 | 3.77537e-32 | 1.000000 |
| rad26    | 3.55641e-32 | 1.000000 | 3.55641e-32 | 1.000000 |
| rad11    | 2.19111e-32 | 1.000000 | 2.19111e-32 | 1.000000 |
| rad31    | 1.07023e-32 | 1.000000 | 1.07023e-32 | 1.000000 |
| rad13    | 5.46979e-34 | 1.000000 | 5.46979e-34 | 1.000000 |
| rad19syn | 1.62279e-34 | 1.000000 | 1.62279e-34 | 1.000000 |
| rad9     | 5.17709e-35 | 1.000000 | 5.17709e-35 | 1.000000 |
| rad14    | 4.12017e-36 | 1.000000 | 4.12017e-36 | 1.000000 |
| rad25    | 3.10196e-36 | 1.000000 | 3.10196e-36 | 1.000000 |
| rad23    | 2.18426e-36 | 1.000000 | 2.18426e-36 | 1.000000 |
| rad27    | 9.98723e-37 | 1.000000 | 9.98723e-37 | 1.000000 |
| rad33    | 9.48652e-37 | 1.000000 | 9.48652e-37 | 1.000000 |
| rad45    | 9.82490e-38 | 1.000000 | 9.82490e-38 | 1.000000 |
| rad15    | 2.35615e-38 | 1.000000 | 2.35615e-38 | 1.000000 |
| rad36    | 6.51379e-39 | 1.000000 | 6.51379e-39 | 1.000000 |
| rad5     | 2.91059e-40 | 1.000000 | 2.91059e-40 | 1.000000 |
| rad12    | 1.33665e-40 | 1.000000 | 1.33665e-40 | 1.000000 |
| rad20    | 1.71520e-41 | 1.000000 | 1.71520e-41 | 1.000000 |
| rad21    | 1.66458e-41 | 1.000000 | 1.66458e-41 | 1.000000 |
| rad22    | 3.00051e-42 | 1.000000 | 3.00051e-42 | 1.000000 |
| rad18    | 3.09188e-44 | 1.000000 | 3.09188e-44 | 1.000000 |
| rad24    | 1.48151e-45 | 1.000000 | 1.48151e-45 | 1.000000 |
| rad8     | 1.69031e-61 | 1.000000 | 1.69031e-61 | 1.000000 |

0.100000000E-06 Pa, 400.000000 K

| Rate constant             | True (fraction)        | Effective (fraction)   |
|---------------------------|------------------------|------------------------|
| Total                     | 1.29463e-13 (1.00 )    | 1.29463e-13 (1.00 )    |
| Formation of rad19        | 1.28526e-13 (0.993 )   | 1.28526e-13 (0.993 )   |
| H-abstraction to cyc2enyl | 9.19357e-16 (0.00710 ) | 9.19357e-16 (0.00710 ) |
| H-abstraction to cyclenyl | 1.69485e-17 (0.000131) | 1.69485e-17 (0.000131) |

| species                       | PYtrue      | Cumul    | PYeffective | Cumul    |
|-------------------------------|-------------|----------|-------------|----------|
| Indene+H                      | 0.991683    | 0.991683 | 0.991683    | 0.991683 |
| Benzene+cycloprop-2-enylidene | 0.00710133  | 0.998784 | 0.00710133  | 0.998784 |
| PhCHCCH2+H                    | 0.00100586  | 0.999790 | 0.00100586  | 0.999790 |
| Benzene+cycloprop-1-enylidene | 0.000130914 | 0.999921 | 0.000130914 | 0.999921 |
| C2H2+PhCH2                    | 2.22468e-05 | 0.999943 | 2.22468e-05 | 0.999943 |
| PhCCH+CH3                     | 1.95098e-05 | 0.999963 | 1.95098e-05 | 0.999963 |
| Ph+MeAc                       | 1.45179e-05 | 0.999977 | 1.45179e-05 | 0.999977 |
| PhCCCH3+H                     | 1.31952e-05 | 0.999990 | 1.31952e-05 | 0.999990 |
| rad67                         | 4.22167e-06 | 0.999994 | 4.22167e-06 | 0.999994 |
| Ph+Allene                     | 2.97391e-06 | 0.999997 | 2.97391e-06 | 0.999997 |
| rad35                         | 1.68909e-06 | 0.999999 | 1.68909e-06 | 0.999999 |
| PhCH2CCH+H                    | 6.93048e-07 | 1.000000 | 6.93048e-07 | 1.000000 |
| PAH7+H                        | 2.89758e-07 | 1.000000 | 2.89758e-07 | 1.000000 |
| rad37                         | 8.82205e-08 | 1.000000 | 8.82205e-08 | 1.000000 |
| rad39                         | 7.05188e-08 | 1.000000 | 7.05188e-08 | 1.000000 |
| rad30                         | 3.41246e-08 | 1.000000 | 3.41246e-08 | 1.000000 |
| PAH9+H                        | 5.67069e-09 | 1.000000 | 5.67069e-09 | 1.000000 |
| PhcycC3H3_A+H                 | 4.88900e-09 | 1.000000 | 4.88900e-09 | 1.000000 |
| rad38                         | 3.07435e-09 | 1.000000 | 3.07435e-09 | 1.000000 |
| PAH10+CH3                     | 1.94150e-09 | 1.000000 | 1.94150e-09 | 1.000000 |
| PAH3+H                        | 5.34449e-10 | 1.000000 | 5.34449e-10 | 1.000000 |
| PhcycC3H3_B+H                 | 4.15151e-10 | 1.000000 | 4.15151e-10 | 1.000000 |
| rad60syn                      | 3.79130e-10 | 1.000000 | 3.79130e-10 | 1.000000 |
| rad46                         | 2.31290e-10 | 1.000000 | 2.31290e-10 | 1.000000 |
| Phenyl+cycC3H4                | 2.22328e-10 | 1.000000 | 0.000000    | 1.000000 |
| rad60anti                     | 2.01850e-10 | 1.000000 | 2.01850e-10 | 1.000000 |
| rad59                         | 8.49299e-11 | 1.000000 | 8.49299e-11 | 1.000000 |
| rad54                         | 6.39706e-11 | 1.000000 | 6.39706e-11 | 1.000000 |
| rad43                         | 3.46932e-11 | 1.000000 | 3.46932e-11 | 1.000000 |
| rad50                         | 8.28672e-12 | 1.000000 | 8.28672e-12 | 1.000000 |
| rad62                         | 7.28467e-12 | 1.000000 | 7.28467e-12 | 1.000000 |
| rad70                         | 3.85328e-12 | 1.000000 | 3.85328e-12 | 1.000000 |
| PAH1+H                        | 3.61003e-12 | 1.000000 | 3.61003e-12 | 1.000000 |
| rad55                         | 1.60055e-12 | 1.000000 | 1.60055e-12 | 1.000000 |
| rad34                         | 2.43952e-13 | 1.000000 | 2.43952e-13 | 1.000000 |
| rad52                         | 1.72576e-13 | 1.000000 | 1.72576e-13 | 1.000000 |
| rad58                         | 1.69180e-13 | 1.000000 | 1.69180e-13 | 1.000000 |
| rad51                         | 1.42864e-13 | 1.000000 | 1.42864e-13 | 1.000000 |
| rad41                         | 6.83260e-14 | 1.000000 | 6.83260e-14 | 1.000000 |
| rad42                         | 2.71734e-14 | 1.000000 | 2.71734e-14 | 1.000000 |
| rad53                         | 6.88019e-15 | 1.000000 | 6.88019e-15 | 1.000000 |
| rad65                         | 4.39173e-15 | 1.000000 | 4.39173e-15 | 1.000000 |
| rad61                         | 3.43038e-15 | 1.000000 | 3.43038e-15 | 1.000000 |
| rad64                         | 3.05834e-15 | 1.000000 | 3.05834e-15 | 1.000000 |

|           |             |         |             |         |
|-----------|-------------|---------|-------------|---------|
| rad56     | 5.30924e-16 | 1.00000 | 5.30924e-16 | 1.00000 |
| rad68syn  | 7.48244e-17 | 1.00000 | 7.48244e-17 | 1.00000 |
| rad68anti | 5.24834e-17 | 1.00000 | 5.24834e-17 | 1.00000 |
| rad40syn  | 6.39129e-18 | 1.00000 | 6.39129e-18 | 1.00000 |
| PAH8+H    | 5.94551e-18 | 1.00000 | 5.94551e-18 | 1.00000 |
| rad40anti | 4.74371e-18 | 1.00000 | 4.74371e-18 | 1.00000 |
| rad73     | 4.85676e-19 | 1.00000 | 4.85676e-19 | 1.00000 |
| rad71     | 4.97335e-20 | 1.00000 | 4.97335e-20 | 1.00000 |
| rad19anti | 4.76696e-20 | 1.00000 | 4.76696e-20 | 1.00000 |
| rad6      | 1.95163e-22 | 1.00000 | 1.95163e-22 | 1.00000 |
| rad2      | 1.53406e-22 | 1.00000 | 1.53406e-22 | 1.00000 |
| rad1      | 1.42796e-23 | 1.00000 | 1.42796e-23 | 1.00000 |
| rad23     | 1.27324e-23 | 1.00000 | 1.27324e-23 | 1.00000 |
| rad10     | 8.48618e-24 | 1.00000 | 8.48618e-24 | 1.00000 |
| rad3      | 2.44768e-24 | 1.00000 | 2.44768e-24 | 1.00000 |
| rad45     | 2.30531e-24 | 1.00000 | 2.30531e-24 | 1.00000 |
| rad4      | 1.28938e-24 | 1.00000 | 1.28938e-24 | 1.00000 |
| rad72     | 7.32148e-25 | 1.00000 | 7.32148e-25 | 1.00000 |
| rad19syn  | 2.04434e-25 | 1.00000 | 2.04434e-25 | 1.00000 |
| rad9      | 1.47568e-25 | 1.00000 | 1.47568e-25 | 1.00000 |
| rad36     | 8.89404e-26 | 1.00000 | 8.89404e-26 | 1.00000 |
| rad31     | 5.03677e-26 | 1.00000 | 5.03677e-26 | 1.00000 |
| rad7      | 1.68156e-26 | 1.00000 | 1.68156e-26 | 1.00000 |
| rad26     | 7.32185e-27 | 1.00000 | 7.32185e-27 | 1.00000 |
| rad11     | 3.37570e-27 | 1.00000 | 3.37570e-27 | 1.00000 |
| rad28     | 3.05491e-27 | 1.00000 | 3.05491e-27 | 1.00000 |
| rad13     | 1.03852e-28 | 1.00000 | 1.03852e-28 | 1.00000 |
| rad15     | 8.96529e-29 | 1.00000 | 8.96529e-29 | 1.00000 |
| rad12     | 1.89524e-29 | 1.00000 | 1.89524e-29 | 1.00000 |
| rad47     | 7.65193e-30 | 1.00000 | 7.65193e-30 | 1.00000 |
| rad22     | 2.51727e-30 | 1.00000 | 2.51727e-30 | 1.00000 |
| rad25     | 1.12850e-30 | 1.00000 | 1.12850e-30 | 1.00000 |
| rad14     | 6.69860e-31 | 1.00000 | 6.69860e-31 | 1.00000 |
| rad27     | 5.99968e-31 | 1.00000 | 5.99968e-31 | 1.00000 |
| rad33     | 1.95547e-31 | 1.00000 | 1.95547e-31 | 1.00000 |
| rad21     | 4.27562e-33 | 1.00000 | 4.27562e-33 | 1.00000 |
| rad20     | 1.83715e-33 | 1.00000 | 1.83715e-33 | 1.00000 |
| rad5      | 6.27512e-34 | 1.00000 | 6.27512e-34 | 1.00000 |
| rad24     | 3.56166e-35 | 1.00000 | 3.56166e-35 | 1.00000 |
| rad18     | 7.85524e-36 | 1.00000 | 7.85524e-36 | 1.00000 |
| rad8      | 6.65008e-45 | 1.00000 | 6.65008e-45 | 1.00000 |

0.100000000E-06 Pa, 500.000000 K

=====

| Rate constant             | True (fraction)        | Effective (fraction)   |
|---------------------------|------------------------|------------------------|
| Total                     | 2.52837e-13 (1.00 )    | 2.52837e-13 (1.00 )    |
| Formation of rad19        | 2.47941e-13 (0.981 )   | 2.47941e-13 (0.981 )   |
| H-abstraction to cyc2enyl | 4.69058e-15 (0.0186 )  | 4.69058e-15 (0.0186 )  |
| H-abstraction to cyclenyl | 2.05381e-16 (0.000812) | 2.05381e-16 (0.000812) |

| species                       | PYtrue      | Cumul    | PYeffective | Cumul    |
|-------------------------------|-------------|----------|-------------|----------|
| Indene+H                      | 0.978428    | 0.978428 | 0.978428    | 0.978428 |
| Benzene+cycloprop-2-enylidene | 0.0185518   | 0.996979 | 0.0185518   | 0.996979 |
| PhCHCCH2+H                    | 0.00202477  | 0.999004 | 0.00202477  | 0.999004 |
| Benzene+cycloprop-1-enylidene | 0.000812306 | 0.999816 | 0.000812306 | 0.999816 |
| C2H2+PhCH2                    | 5.13363e-05 | 0.999868 | 5.13363e-05 | 0.999868 |
| PhCCH+CH3                     | 3.71182e-05 | 0.999905 | 3.71182e-05 | 0.999905 |
| Ph+MeAc                       | 3.63101e-05 | 0.999941 | 3.63101e-05 | 0.999941 |
| PhCCCH3+H                     | 2.84449e-05 | 0.999970 | 2.84449e-05 | 0.999970 |
| Ph+Allene                     | 1.09470e-05 | 0.999981 | 1.09470e-05 | 0.999981 |
| rad67                         | 1.05822e-05 | 0.999991 | 1.05822e-05 | 0.999991 |
| rad35                         | 4.10935e-06 | 0.999995 | 4.10935e-06 | 0.999995 |
| PhCH2CCH+H                    | 2.95392e-06 | 0.999998 | 2.95392e-06 | 0.999998 |
| PAH7+H                        | 8.51564e-07 | 0.999999 | 8.51564e-07 | 0.999999 |
| rad37                         | 2.86678e-07 | 0.999999 | 2.86678e-07 | 0.999999 |
| rad39                         | 2.02118e-07 | 1.000000 | 2.02118e-07 | 1.000000 |
| rad30                         | 8.94923e-08 | 1.000000 | 8.94923e-08 | 1.000000 |
| PhcycC3H3_A+H                 | 5.02850e-08 | 1.000000 | 5.02850e-08 | 1.000000 |
| PAH9+H                        | 2.06879e-08 | 1.000000 | 2.06879e-08 | 1.000000 |
| PAH10+CH3                     | 1.44052e-08 | 1.000000 | 1.44052e-08 | 1.000000 |
| rad38                         | 1.31834e-08 | 1.000000 | 1.31834e-08 | 1.000000 |
| PhcycC3H3_B+H                 | 7.81107e-09 | 1.000000 | 7.81107e-09 | 1.000000 |
| Phenyl+cycC3H4                | 3.55660e-09 | 1.000000 | 0.000000    | 1.000000 |
| PAH3+H                        | 2.97649e-09 | 1.000000 | 2.97649e-09 | 1.000000 |
| rad60syn                      | 1.43183e-09 | 1.000000 | 1.43183e-09 | 1.000000 |
| rad46                         | 1.04913e-09 | 1.000000 | 1.04913e-09 | 1.000000 |
| rad60anti                     | 7.84373e-10 | 1.000000 | 7.84373e-10 | 1.000000 |
| rad54                         | 4.68691e-10 | 1.000000 | 4.68691e-10 | 1.000000 |

|           |             |          |             |          |
|-----------|-------------|----------|-------------|----------|
| rad59     | 4.42102e-10 | 1.000000 | 4.42102e-10 | 1.000000 |
| rad43     | 1.96278e-10 | 1.000000 | 1.96278e-10 | 1.000000 |
| rad50     | 6.65687e-11 | 1.000000 | 6.65687e-11 | 1.000000 |
| PAH1+H    | 4.68911e-11 | 1.000000 | 4.68911e-11 | 1.000000 |
| rad62     | 3.77646e-11 | 1.000000 | 3.77646e-11 | 1.000000 |
| rad70     | 3.76454e-11 | 1.000000 | 3.76454e-11 | 1.000000 |
| rad55     | 1.50995e-11 | 1.000000 | 1.50995e-11 | 1.000000 |
| rad34     | 3.22092e-12 | 1.000000 | 3.22092e-12 | 1.000000 |
| rad51     | 2.08196e-12 | 1.000000 | 2.08196e-12 | 1.000000 |
| rad58     | 2.05092e-12 | 1.000000 | 2.05092e-12 | 1.000000 |
| rad52     | 1.88540e-12 | 1.000000 | 1.88540e-12 | 1.000000 |
| rad41     | 8.63972e-13 | 1.000000 | 8.63972e-13 | 1.000000 |
| rad42     | 2.74850e-13 | 1.000000 | 2.74850e-13 | 1.000000 |
| rad53     | 1.70507e-13 | 1.000000 | 1.70507e-13 | 1.000000 |
| rad61     | 1.40668e-13 | 1.000000 | 1.40668e-13 | 1.000000 |
| rad64     | 7.73135e-14 | 1.000000 | 7.73135e-14 | 1.000000 |
| rad65     | 6.64224e-14 | 1.000000 | 6.64224e-14 | 1.000000 |
| rad56     | 2.62115e-14 | 1.000000 | 2.62115e-14 | 1.000000 |
| rad68syn  | 3.88259e-15 | 1.000000 | 3.88259e-15 | 1.000000 |
| rad68anti | 2.67414e-15 | 1.000000 | 2.67414e-15 | 1.000000 |
| PAH8+H    | 8.47559e-16 | 1.000000 | 8.47559e-16 | 1.000000 |
| rad40syn  | 5.55783e-16 | 1.000000 | 5.55783e-16 | 1.000000 |
| rad40anti | 4.06573e-16 | 1.000000 | 4.06573e-16 | 1.000000 |
| rad73     | 6.83536e-17 | 1.000000 | 6.83536e-17 | 1.000000 |
| rad71     | 1.35737e-17 | 1.000000 | 1.35737e-17 | 1.000000 |
| rad19anti | 6.68017e-18 | 1.000000 | 6.68017e-18 | 1.000000 |
| rad23     | 7.44871e-20 | 1.000000 | 7.44871e-20 | 1.000000 |
| rad2      | 7.36240e-20 | 1.000000 | 7.36240e-20 | 1.000000 |
| rad6      | 2.62275e-20 | 1.000000 | 2.62275e-20 | 1.000000 |
| rad45     | 2.17166e-20 | 1.000000 | 2.17166e-20 | 1.000000 |
| rad1      | 8.87379e-21 | 1.000000 | 8.87379e-21 | 1.000000 |
| rad10     | 3.16354e-21 | 1.000000 | 3.16354e-21 | 1.000000 |
| rad72     | 1.99196e-21 | 1.000000 | 1.99196e-21 | 1.000000 |
| rad19syn  | 1.45990e-21 | 1.000000 | 1.45990e-21 | 1.000000 |
| rad3      | 1.44058e-21 | 1.000000 | 1.44058e-21 | 1.000000 |
| rad36     | 1.19582e-21 | 1.000000 | 1.19582e-21 | 1.000000 |
| rad4      | 8.25051e-22 | 1.000000 | 8.25051e-22 | 1.000000 |
| rad9      | 2.15959e-22 | 1.000000 | 2.15959e-22 | 1.000000 |
| rad31     | 1.77645e-23 | 1.000000 | 1.77645e-23 | 1.000000 |
| rad7      | 2.36689e-24 | 1.000000 | 2.36689e-24 | 1.000000 |
| rad26     | 6.36622e-25 | 1.000000 | 6.36622e-25 | 1.000000 |
| rad11     | 5.00166e-25 | 1.000000 | 5.00166e-25 | 1.000000 |
| rad28     | 3.23206e-25 | 1.000000 | 3.23206e-25 | 1.000000 |
| rad12     | 1.85138e-25 | 1.000000 | 1.85138e-25 | 1.000000 |
| rad15     | 1.38978e-25 | 1.000000 | 1.38978e-25 | 1.000000 |
| rad13     | 1.60438e-26 | 1.000000 | 1.60438e-26 | 1.000000 |
| rad22     | 4.77949e-27 | 1.000000 | 4.77949e-27 | 1.000000 |
| rad47     | 5.02583e-28 | 1.000000 | 5.02583e-28 | 1.000000 |
| rad33     | 3.30180e-29 | 1.000000 | 3.30180e-29 | 1.000000 |
| rad27     | 1.02692e-29 | 1.000000 | 1.02692e-29 | 1.000000 |
| rad25     | 7.51333e-30 | 1.000000 | 7.51333e-30 | 1.000000 |
| rad14     | 4.67491e-30 | 1.000000 | 4.67491e-30 | 1.000000 |
| rad21     | 7.13684e-31 | 1.000000 | 7.13684e-31 | 1.000000 |
| rad20     | 2.22611e-31 | 1.000000 | 2.22611e-31 | 1.000000 |
| rad24     | 1.41937e-31 | 1.000000 | 1.41937e-31 | 1.000000 |
| rad5      | 7.89841e-34 | 1.000000 | 7.89841e-34 | 1.000000 |
| rad18     | 7.02719e-34 | 1.000000 | 7.02719e-34 | 1.000000 |
| rad8      | 1.56286e-40 | 1.000000 | 1.56286e-40 | 1.000000 |

0.100000000E-06 Pa, 600.000000 K

| Rate constant             | True (fraction)        | Effective (fraction)   |
|---------------------------|------------------------|------------------------|
| Total                     | 4.35570e-13 (1.00 )    | 4.35570e-13 (1.00 )    |
| Formation of rad19        | 4.18892e-13 (0.962 )   | 4.18892e-13 (0.962 )   |
| H-abstraction to cyc2enyl | 1.54751e-14 (0.0355 )  | 1.54751e-14 (0.0355 )  |
| H-abstraction to cyclenyl | 1.20343e-15 (0.00276 ) | 1.20343e-15 (0.00276 ) |

  

| species                       | PYtrue      | Cumul    | PYeffective | Cumul    |
|-------------------------------|-------------|----------|-------------|----------|
| Indene+H                      | 0.957276    | 0.957276 | 0.957276    | 0.957276 |
| Benzene+cycloprop-2-enylidene | 0.0355285   | 0.992805 | 0.0355285   | 0.992805 |
| PhCHCCH2+H                    | 0.00402172  | 0.996826 | 0.00402172  | 0.996826 |
| Benzene+cycloprop-1-enylidene | 0.00276289  | 0.999589 | 0.00276289  | 0.999589 |
| C2H2+PhCH2                    | 0.000111945 | 0.999701 | 0.000111945 | 0.999701 |
| Ph+MeAc                       | 8.57420e-05 | 0.999787 | 8.57420e-05 | 0.999787 |
| PhCCH+CH3                     | 6.75064e-05 | 0.999854 | 6.75064e-05 | 0.999854 |
| PhCCCH3+H                     | 5.90383e-05 | 0.999913 | 5.90383e-05 | 0.999913 |
| Ph+Allene                     | 3.56628e-05 | 0.999949 | 3.56628e-05 | 0.999949 |
| rad67                         | 2.54029e-05 | 0.999975 | 2.54029e-05 | 0.999975 |

|                |             |          |             |          |
|----------------|-------------|----------|-------------|----------|
| PhCH2CCH+H     | 1.09199e-05 | 0.999985 | 1.09199e-05 | 0.999985 |
| rad35          | 9.63305e-06 | 0.999995 | 9.63305e-06 | 0.999995 |
| PAH7+H         | 2.26706e-06 | 0.999997 | 2.26706e-06 | 0.999997 |
| rad37          | 8.64904e-07 | 0.999998 | 8.64904e-07 | 0.999998 |
| rad39          | 5.20249e-07 | 0.999999 | 5.20249e-07 | 0.999999 |
| PhcycC3H3_A+H  | 3.56529e-07 | 0.999999 | 3.56529e-07 | 0.999999 |
| rad30          | 2.27441e-07 | 0.999999 | 2.27441e-07 | 0.999999 |
| PAH10+CH3      | 8.50920e-08 | 0.999999 | 8.50920e-08 | 0.999999 |
| PhcycC3H3_B+H  | 8.43895e-08 | 0.999999 | 8.43895e-08 | 0.999999 |
| PAH9+H         | 7.13070e-08 | 1.000000 | 7.13070e-08 | 1.000000 |
| rad38          | 5.21311e-08 | 1.000000 | 5.21311e-08 | 1.000000 |
| Phenyl+cycC3H4 | 3.58023e-08 | 1.000000 | 0.000000    | 1.000000 |
| PAH3+H         | 1.45691e-08 | 1.000000 | 1.45691e-08 | 1.000000 |
| rad60syn       | 5.03972e-09 | 1.000000 | 5.03972e-09 | 1.000000 |
| rad46          | 4.37621e-09 | 1.000000 | 4.37621e-09 | 1.000000 |
| rad60anti      | 2.82886e-09 | 1.000000 | 2.82886e-09 | 1.000000 |
| rad54          | 2.63022e-09 | 1.000000 | 2.63022e-09 | 1.000000 |
| rad59          | 2.03126e-09 | 1.000000 | 2.03126e-09 | 1.000000 |
| rad43          | 9.14301e-10 | 1.000000 | 9.14301e-10 | 1.000000 |
| rad50          | 4.49074e-10 | 1.000000 | 4.49074e-10 | 1.000000 |
| PAH1+H         | 4.05905e-10 | 1.000000 | 4.05905e-10 | 1.000000 |
| rad70          | 2.63826e-10 | 1.000000 | 2.63826e-10 | 1.000000 |
| rad62          | 1.58022e-10 | 1.000000 | 1.58022e-10 | 1.000000 |
| rad55          | 1.01573e-10 | 1.000000 | 1.01573e-10 | 1.000000 |
| rad34          | 2.81348e-11 | 1.000000 | 2.81348e-11 | 1.000000 |
| rad51          | 2.21630e-11 | 1.000000 | 2.21630e-11 | 1.000000 |
| rad58          | 1.79744e-11 | 1.000000 | 1.79744e-11 | 1.000000 |
| rad52          | 1.61050e-11 | 1.000000 | 1.61050e-11 | 1.000000 |
| rad41          | 7.27827e-12 | 1.000000 | 7.27827e-12 | 1.000000 |
| rad61          | 2.69080e-12 | 1.000000 | 2.69080e-12 | 1.000000 |
| rad53          | 2.26526e-12 | 1.000000 | 2.26526e-12 | 1.000000 |
| rad42          | 1.88131e-12 | 1.000000 | 1.88131e-12 | 1.000000 |
| rad64          | 9.96176e-13 | 1.000000 | 9.96176e-13 | 1.000000 |
| rad65          | 7.15322e-13 | 1.000000 | 7.15322e-13 | 1.000000 |
| rad56          | 5.47638e-13 | 1.000000 | 5.47638e-13 | 1.000000 |
| rad68syn       | 8.54715e-14 | 1.000000 | 8.54715e-14 | 1.000000 |
| rad68anti      | 5.81389e-14 | 1.000000 | 5.81389e-14 | 1.000000 |
| PAH8+H         | 3.69240e-14 | 1.000000 | 3.69240e-14 | 1.000000 |
| rad40syn       | 1.73285e-14 | 1.000000 | 1.73285e-14 | 1.000000 |
| rad40anti      | 1.26417e-14 | 1.000000 | 1.26417e-14 | 1.000000 |
| rad73          | 3.37834e-15 | 1.000000 | 3.37834e-15 | 1.000000 |
| rad71          | 1.04445e-15 | 1.000000 | 1.04445e-15 | 1.000000 |
| rad19anti      | 4.93441e-17 | 1.000000 | 4.93441e-17 | 1.000000 |
| rad23          | 4.18354e-18 | 1.000000 | 4.18354e-18 | 1.000000 |
| rad2           | 3.49623e-18 | 1.000000 | 3.49623e-18 | 1.000000 |
| rad45          | 1.26811e-18 | 1.000000 | 1.26811e-18 | 1.000000 |
| rad72          | 6.43661e-19 | 1.000000 | 6.43661e-19 | 1.000000 |
| rad1           | 5.88203e-19 | 1.000000 | 5.88203e-19 | 1.000000 |
| rad9           | 4.45561e-19 | 1.000000 | 4.45561e-19 | 1.000000 |
| rad6           | 3.74764e-19 | 1.000000 | 3.74764e-19 | 1.000000 |
| rad19syn       | 1.52297e-19 | 1.000000 | 1.52297e-19 | 1.000000 |
| rad36          | 1.40066e-19 | 1.000000 | 1.40066e-19 | 1.000000 |
| rad10          | 9.26044e-20 | 1.000000 | 9.26044e-20 | 1.000000 |
| rad3           | 5.99916e-20 | 1.000000 | 5.99916e-20 | 1.000000 |
| rad4           | 4.14944e-20 | 1.000000 | 4.14944e-20 | 1.000000 |
| rad12          | 1.38519e-21 | 1.000000 | 1.38519e-21 | 1.000000 |
| rad31          | 3.24820e-22 | 1.000000 | 3.24820e-22 | 1.000000 |
| rad15          | 2.71620e-22 | 1.000000 | 2.71620e-22 | 1.000000 |
| rad7           | 3.94501e-23 | 1.000000 | 3.94501e-23 | 1.000000 |
| rad26          | 9.80231e-24 | 1.000000 | 9.80231e-24 | 1.000000 |
| rad11          | 9.78962e-24 | 1.000000 | 9.78962e-24 | 1.000000 |
| rad28          | 5.57362e-24 | 1.000000 | 5.57362e-24 | 1.000000 |
| rad13          | 3.14362e-25 | 1.000000 | 3.14362e-25 | 1.000000 |
| rad22          | 2.03549e-25 | 1.000000 | 2.03549e-25 | 1.000000 |
| rad47          | 1.30363e-26 | 1.000000 | 1.30363e-26 | 1.000000 |
| rad33          | 1.10779e-27 | 1.000000 | 1.10779e-27 | 1.000000 |
| rad24          | 9.86982e-28 | 1.000000 | 9.86982e-28 | 1.000000 |
| rad21          | 3.68279e-28 | 1.000000 | 3.68279e-28 | 1.000000 |
| rad27          | 2.00633e-28 | 1.000000 | 2.00633e-28 | 1.000000 |
| rad25          | 1.22327e-28 | 1.000000 | 1.22327e-28 | 1.000000 |
| rad20          | 7.37839e-29 | 1.000000 | 7.37839e-29 | 1.000000 |
| rad14          | 5.56733e-29 | 1.000000 | 5.56733e-29 | 1.000000 |
| rad18          | 5.87919e-32 | 1.000000 | 5.87919e-32 | 1.000000 |
| rad5           | 1.37325e-33 | 1.000000 | 1.37325e-33 | 1.000000 |
| rad8           | 2.39366e-35 | 1.000000 | 2.39366e-35 | 1.000000 |

0.100000000E-06 Pa, 700.00000 K

=====

Rate constant | True (fraction) | Effective (fraction)

-----

|                           |                        |                        |
|---------------------------|------------------------|------------------------|
| Total                     | 6.91694e-13 (1.00 )    | 6.91694e-13 (1.00 )    |
| Formation of rad19        | 6.47922e-13 (0.937 )   | 6.47922e-13 (0.937 )   |
| H-abstraction to cyc2enyl | 3.91858e-14 (0.0567 )  | 3.91858e-14 (0.0567 )  |
| H-abstraction to cyc1enyl | 4.58543e-15 (0.00663 ) | 4.58542e-15 (0.00663 ) |

| species                       | PYtrue      | Cumul    | PYeffective | Cumul    |
|-------------------------------|-------------|----------|-------------|----------|
| Indene+H                      | 0.928261    | 0.928261 | 0.928261    | 0.928261 |
| Benzene+cycloprop-2-enylidene | 0.0566520   | 0.984913 | 0.0566520   | 0.984913 |
| PhCHCCH2+H                    | 0.00759850  | 0.992512 | 0.00759851  | 0.992512 |
| Benzene+cycloprop-1-enylidene | 0.00662927  | 0.999141 | 0.00662927  | 0.999141 |
| C2H2+PhCH2                    | 0.000223367 | 0.999364 | 0.000223367 | 0.999364 |
| Ph+MeAc                       | 0.000184762 | 0.999549 | 0.000184762 | 0.999549 |
| PhCCH+CH3                     | 0.000114475 | 0.999663 | 0.000114475 | 0.999663 |
| PhCCCH3+H                     | 0.000114174 | 0.999778 | 0.000114174 | 0.999778 |
| Ph+Allene                     | 9.86533e-05 | 0.999876 | 9.86533e-05 | 0.999876 |
| rad67                         | 5.61617e-05 | 0.999932 | 5.61618e-05 | 0.999932 |
| PhCH2CCH+H                    | 3.37385e-05 | 0.999966 | 3.37385e-05 | 0.999966 |
| rad35                         | 2.09201e-05 | 0.999987 | 2.09202e-05 | 0.999987 |
| PAH7+H                        | 5.25052e-06 | 0.999992 | 5.25052e-06 | 0.999992 |
| rad37                         | 2.31770e-06 | 0.999995 | 2.31770e-06 | 0.999995 |
| PhcycC3H3_A+H                 | 1.84668e-06 | 0.999997 | 1.84668e-06 | 0.999997 |
| rad39                         | 1.15814e-06 | 0.999998 | 1.15814e-06 | 0.999998 |
| PhcycC3H3_B+H                 | 5.97889e-07 | 0.999998 | 5.97889e-07 | 0.999998 |
| rad30                         | 5.35177e-07 | 0.999999 | 5.35177e-07 | 0.999999 |
| PAH10+CH3                     | 3.93624e-07 | 0.999999 | 3.93624e-07 | 0.999999 |
| Phenyl+cycC3H4                | 2.47273e-07 | 0.999999 | 0.00000     | 0.999999 |
| PAH9+H                        | 2.20558e-07 | 1.000000 | 2.20558e-07 | 0.999999 |
| rad38                         | 1.79348e-07 | 1.000000 | 1.79348e-07 | 1.000000 |
| PAH3+H                        | 5.98815e-08 | 1.000000 | 5.98815e-08 | 1.000000 |
| rad46                         | 1.59383e-08 | 1.000000 | 1.59383e-08 | 1.000000 |
| rad60syn                      | 1.57198e-08 | 1.000000 | 1.57198e-08 | 1.000000 |
| rad54                         | 1.11959e-08 | 1.000000 | 1.11959e-08 | 1.000000 |
| rad60anti                     | 9.00502e-09 | 1.000000 | 9.00502e-09 | 1.000000 |
| rad59                         | 7.88061e-09 | 1.000000 | 7.88061e-09 | 1.000000 |
| rad43                         | 3.45953e-09 | 1.000000 | 3.45953e-09 | 1.000000 |
| PAH1+H                        | 2.45995e-09 | 1.000000 | 2.45995e-09 | 1.000000 |
| rad50                         | 2.44563e-09 | 1.000000 | 2.44563e-09 | 1.000000 |
| rad70                         | 1.34938e-09 | 1.000000 | 1.34938e-09 | 1.000000 |
| rad62                         | 5.31170e-10 | 1.000000 | 5.31170e-10 | 1.000000 |
| rad55                         | 4.95201e-10 | 1.000000 | 4.95201e-10 | 1.000000 |
| rad51                         | 1.72653e-10 | 1.000000 | 1.72653e-10 | 1.000000 |
| rad34                         | 1.70511e-10 | 1.000000 | 1.70511e-10 | 1.000000 |
| rad58                         | 1.15481e-10 | 1.000000 | 1.15481e-10 | 1.000000 |
| rad52                         | 1.05442e-10 | 1.000000 | 1.05442e-10 | 1.000000 |
| rad41                         | 4.33848e-11 | 1.000000 | 4.33848e-11 | 1.000000 |
| rad61                         | 2.93831e-11 | 1.000000 | 2.93831e-11 | 1.000000 |
| rad53                         | 1.83949e-11 | 1.000000 | 1.83949e-11 | 1.000000 |
| rad42                         | 9.22818e-12 | 1.000000 | 9.22818e-12 | 1.000000 |
| rad64                         | 7.68987e-12 | 1.000000 | 7.68987e-12 | 1.000000 |
| rad56                         | 6.14022e-12 | 1.000000 | 6.14022e-12 | 1.000000 |
| rad65                         | 5.56200e-12 | 1.000000 | 5.56200e-12 | 1.000000 |
| rad68syn                      | 1.01762e-12 | 1.000000 | 1.01762e-12 | 1.000000 |
| PAH8+H                        | 7.27467e-13 | 1.000000 | 7.27467e-13 | 1.000000 |
| rad68anti                     | 6.85898e-13 | 1.000000 | 6.85898e-13 | 1.000000 |
| rad40syn                      | 2.67923e-13 | 1.000000 | 2.67923e-13 | 1.000000 |
| rad40anti                     | 1.96404e-13 | 1.000000 | 1.96404e-13 | 1.000000 |
| rad73                         | 8.03975e-14 | 1.000000 | 8.03975e-14 | 1.000000 |
| rad71                         | 3.42948e-14 | 1.000000 | 3.42948e-14 | 1.000000 |
| rad9                          | 3.12165e-16 | 1.000000 | 3.12165e-16 | 1.000000 |
| rad19anti                     | 6.95729e-17 | 1.000000 | 6.95729e-17 | 1.000000 |
| rad72                         | 5.61676e-17 | 1.000000 | 5.61676e-17 | 1.000000 |
| rad23                         | 2.02410e-17 | 1.000000 | 2.02410e-17 | 1.000000 |
| rad2                          | 1.62391e-17 | 1.000000 | 1.62391e-17 | 1.000000 |
| rad45                         | 6.10332e-18 | 1.000000 | 6.10333e-18 | 1.000000 |
| rad1                          | 4.21072e-18 | 1.000000 | 4.21072e-18 | 1.000000 |
| rad12                         | 1.17945e-18 | 1.000000 | 1.17945e-18 | 1.000000 |
| rad6                          | 1.10389e-18 | 1.000000 | 1.10389e-18 | 1.000000 |
| rad19syn                      | 8.87889e-19 | 1.000000 | 8.87889e-19 | 1.000000 |
| rad36                         | 8.75810e-19 | 1.000000 | 8.75810e-19 | 1.000000 |
| rad10                         | 3.59531e-19 | 1.000000 | 3.59531e-19 | 1.000000 |
| rad3                          | 2.51171e-19 | 1.000000 | 2.51171e-19 | 1.000000 |
| rad4                          | 2.03687e-19 | 1.000000 | 2.03687e-19 | 1.000000 |
| rad15                         | 1.25799e-19 | 1.000000 | 1.25799e-19 | 1.000000 |
| rad31                         | 9.71078e-22 | 1.000000 | 9.71078e-22 | 1.000000 |
| rad7                          | 1.36513e-22 | 1.000000 | 1.36513e-22 | 1.000000 |
| rad11                         | 3.74391e-23 | 1.000000 | 3.74391e-23 | 1.000000 |
| rad26                         | 3.24469e-23 | 1.000000 | 3.24469e-23 | 1.000000 |
| rad28                         | 1.89999e-23 | 1.000000 | 1.89999e-23 | 1.000000 |
| rad24                         | 2.00377e-24 | 1.000000 | 2.00377e-24 | 1.000000 |

|       |             |          |             |          |
|-------|-------------|----------|-------------|----------|
| rad13 | 1.43981e-24 | 1.000000 | 1.43981e-24 | 1.000000 |
| rad22 | 1.03483e-24 | 1.000000 | 1.03484e-24 | 1.000000 |
| rad21 | 3.05207e-25 | 1.000000 | 3.05207e-25 | 1.000000 |
| rad47 | 1.29142e-25 | 1.000000 | 1.29142e-25 | 1.000000 |
| rad33 | 9.57636e-26 | 1.000000 | 9.57636e-26 | 1.000000 |
| rad20 | 4.79451e-26 | 1.000000 | 4.79451e-26 | 1.000000 |
| rad27 | 5.14968e-27 | 1.000000 | 5.14968e-27 | 1.000000 |
| rad25 | 4.90274e-27 | 1.000000 | 4.90274e-27 | 1.000000 |
| rad14 | 9.35079e-28 | 1.000000 | 9.35079e-28 | 1.000000 |
| rad8  | 5.34063e-30 | 1.000000 | 5.34063e-30 | 1.000000 |
| rad18 | 1.15928e-30 | 1.000000 | 1.15928e-30 | 1.000000 |
| rad5  | 3.69143e-33 | 1.000000 | 3.69143e-33 | 1.000000 |

0.100000000E-06 Pa, 800.000000 K

| Rate constant                 | True (fraction) |           | Effective (fraction) |           |
|-------------------------------|-----------------|-----------|----------------------|-----------|
| -----                         |                 |           |                      |           |
| Total                         | 1.03759e-12     | (1.00 )   | 1.03758e-12          | (1.00 )   |
| Formation of rad19            | 9.41065e-13     | (0.907 )  | 9.41063e-13          | (0.907 )  |
| H-abstraction to cyc2enyl     | 8.32953e-14     | (0.0803 ) | 8.32953e-14          | (0.0803 ) |
| H-abstraction to cyclenyl     | 1.32261e-14     | (0.0127 ) | 1.32261e-14          | (0.0127 ) |
| -----                         |                 |           |                      |           |
| species                       | PYtrue          | Cumul     | PYeffective          | Cumul     |
| -----                         |                 |           |                      |           |
| Indene+H                      | 0.891851        | 0.891851  | 0.891852             | 0.891852  |
| Benzene+cycloprop-2-enylidene | 0.0802780       | 0.972129  | 0.0802781            | 0.972130  |
| PhCHCCH2+H                    | 0.0134622       | 0.985591  | 0.0134623            | 0.985592  |
| Benzene+cycloprop-1-enylidene | 0.0127470       | 0.998338  | 0.0127470            | 0.998339  |
| C2H2+PhCH2                    | 0.000407098     | 0.998746  | 0.000407098          | 0.998747  |
| Ph+MeAc                       | 0.000361138     | 0.999107  | 0.000361137          | 0.999108  |
| Ph+Allene                     | 0.000232338     | 0.999339  | 0.000232338          | 0.999340  |
| PhCCCH3+H                     | 0.000203971     | 0.999543  | 0.000203971          | 0.999544  |
| PhCCH+CH3                     | 0.000180552     | 0.999724  | 0.000180553          | 0.999725  |
| rad67                         | 0.000113174     | 0.999837  | 0.000113174          | 0.999838  |
| PhCH2CCH+H                    | 8.77930e-05     | 0.999924  | 8.77932e-05          | 0.999925  |
| rad35                         | 4.16128e-05     | 0.999966  | 4.16129e-05          | 0.999967  |
| PAH7+H                        | 1.05800e-05     | 0.999977  | 1.05800e-05          | 0.999978  |
| PhcycC3H3_A+H                 | 7.41209e-06     | 0.999984  | 7.41210e-06          | 0.999985  |
| rad37                         | 5.46662e-06     | 0.999990  | 5.46663e-06          | 0.999991  |
| PhcycC3H3_B+H                 | 3.06124e-06     | 0.999993  | 3.06124e-06          | 0.999994  |
| rad39                         | 2.23427e-06     | 0.999995  | 2.23428e-06          | 0.999996  |
| PAH10+CH3                     | 1.45372e-06     | 0.999996  | 1.45373e-06          | 0.999997  |
| Phenyl+cycC3H4                | 1.26413e-06     | 0.999998  | 0.000000             | 0.999997  |
| rad30                         | 1.14933e-06     | 0.999999  | 1.14933e-06          | 0.999998  |
| PAH9+H                        | 6.06281e-07     | 0.999999  | 6.06282e-07          | 0.999999  |
| rad38                         | 5.31254e-07     | 1.000000  | 5.31255e-07          | 1.000000  |
| PAH3+H                        | 2.06534e-07     | 1.000000  | 2.06535e-07          | 1.000000  |
| rad46                         | 5.03837e-08     | 1.000000  | 5.03838e-08          | 1.000000  |
| rad60syn                      | 4.30113e-08     | 1.000000  | 4.30113e-08          | 1.000000  |
| rad54                         | 3.72615e-08     | 1.000000  | 3.72615e-08          | 1.000000  |
| rad59                         | 2.58004e-08     | 1.000000  | 2.58004e-08          | 1.000000  |
| rad60anti                     | 2.50612e-08     | 1.000000  | 2.50612e-08          | 1.000000  |
| PAH1+H                        | 1.11102e-08     | 1.000000  | 1.11102e-08          | 1.000000  |
| rad50                         | 1.08530e-08     | 1.000000  | 1.08530e-08          | 1.000000  |
| rad43                         | 1.08255e-08     | 1.000000  | 1.08255e-08          | 1.000000  |
| rad70                         | 5.27763e-09     | 1.000000  | 5.27763e-09          | 1.000000  |
| rad55                         | 1.83174e-09     | 1.000000  | 1.83175e-09          | 1.000000  |
| rad62                         | 1.46956e-09     | 1.000000  | 1.46956e-09          | 1.000000  |
| rad51                         | 1.02140e-09     | 1.000000  | 1.02140e-09          | 1.000000  |
| rad34                         | 7.64053e-10     | 1.000000  | 7.64054e-10          | 1.000000  |
| rad58                         | 5.66064e-10     | 1.000000  | 5.66065e-10          | 1.000000  |
| rad52                         | 5.41768e-10     | 1.000000  | 5.41769e-10          | 1.000000  |
| rad61                         | 2.09071e-10     | 1.000000  | 2.09072e-10          | 1.000000  |
| rad41                         | 1.94594e-10     | 1.000000  | 1.94595e-10          | 1.000000  |
| rad53                         | 1.01501e-10     | 1.000000  | 1.01501e-10          | 1.000000  |
| rad56                         | 4.31932e-11     | 1.000000  | 4.31933e-11          | 1.000000  |
| rad64                         | 4.01362e-11     | 1.000000  | 4.01363e-11          | 1.000000  |
| rad42                         | 3.44813e-11     | 1.000000  | 3.44814e-11          | 1.000000  |
| rad65                         | 3.26029e-11     | 1.000000  | 3.26029e-11          | 1.000000  |
| PAH8+H                        | 8.11495e-12     | 1.000000  | 8.11497e-12          | 1.000000  |
| rad68syn                      | 7.66845e-12     | 1.000000  | 7.66845e-12          | 1.000000  |
| rad68anti                     | 5.13228e-12     | 1.000000  | 5.13229e-12          | 1.000000  |
| rad40syn                      | 2.48636e-12     | 1.000000  | 2.48636e-12          | 1.000000  |
| rad40anti                     | 1.83893e-12     | 1.000000  | 1.83893e-12          | 1.000000  |
| rad73                         | 1.11381e-12     | 1.000000  | 1.11381e-12          | 1.000000  |
| rad71                         | 6.08037e-13     | 1.000000  | 6.08038e-13          | 1.000000  |
| rad9                          | 2.73155e-14     | 1.000000  | 2.73155e-14          | 1.000000  |
| rad72                         | 2.02032e-15     | 1.000000  | 2.02032e-15          | 1.000000  |
| rad12                         | 6.62384e-17     | 1.000000  | 6.62385e-17          | 1.000000  |
| rad19anti                     | 6.02835e-17     | 1.000000  | 6.02835e-17          | 1.000000  |



|          |             |         |             |         |
|----------|-------------|---------|-------------|---------|
| rad23    | 3.52732e-17 | 1.00000 | 3.52732e-17 | 1.00000 |
| rad2     | 2.44970e-17 | 1.00000 | 2.44971e-17 | 1.00000 |
| rad45    | 1.35135e-17 | 1.00000 | 1.35135e-17 | 1.00000 |
| rad1     | 7.53055e-18 | 1.00000 | 7.53056e-18 | 1.00000 |
| rad15    | 6.33587e-18 | 1.00000 | 6.33588e-18 | 1.00000 |
| rad36    | 1.67596e-18 | 1.00000 | 1.67596e-18 | 1.00000 |
| rad19syn | 1.44428e-18 | 1.00000 | 1.44428e-18 | 1.00000 |
| rad6     | 1.40094e-18 | 1.00000 | 1.40094e-18 | 1.00000 |
| rad10    | 5.39308e-19 | 1.00000 | 5.39309e-19 | 1.00000 |
| rad3     | 3.27184e-19 | 1.00000 | 3.27184e-19 | 1.00000 |
| rad4     | 2.70618e-19 | 1.00000 | 2.70619e-19 | 1.00000 |
| rad31    | 1.51028e-21 | 1.00000 | 1.51028e-21 | 1.00000 |
| rad24    | 4.04465e-22 | 1.00000 | 4.04465e-22 | 1.00000 |
| rad7     | 2.10328e-22 | 1.00000 | 2.10328e-22 | 1.00000 |
| rad21    | 1.34471e-22 | 1.00000 | 1.34471e-22 | 1.00000 |
| rad11    | 6.21662e-23 | 1.00000 | 6.21663e-23 | 1.00000 |
| rad26    | 4.50908e-23 | 1.00000 | 4.50909e-23 | 1.00000 |
| rad28    | 2.63509e-23 | 1.00000 | 2.63509e-23 | 1.00000 |
| rad33    | 2.36839e-23 | 1.00000 | 2.36839e-23 | 1.00000 |
| rad20    | 2.16401e-23 | 1.00000 | 2.16401e-23 | 1.00000 |
| rad13    | 4.70445e-24 | 1.00000 | 4.70446e-24 | 1.00000 |
| rad22    | 2.00666e-24 | 1.00000 | 2.00666e-24 | 1.00000 |
| rad47    | 8.53940e-25 | 1.00000 | 8.53940e-25 | 1.00000 |
| rad27    | 3.72933e-25 | 1.00000 | 3.72933e-25 | 1.00000 |
| rad25    | 3.67487e-25 | 1.00000 | 3.67488e-25 | 1.00000 |
| rad8     | 2.39851e-25 | 1.00000 | 2.39851e-25 | 1.00000 |
| rad14    | 3.84293e-26 | 1.00000 | 3.84293e-26 | 1.00000 |
| rad18    | 5.53168e-29 | 1.00000 | 5.53169e-29 | 1.00000 |
| rad5     | 1.78142e-32 | 1.00000 | 1.78142e-32 | 1.00000 |

0.100000000E-06 Pa, 900.000000 K

| Rate constant                 | True (fraction)       | Effective (fraction)  |             |          |
|-------------------------------|-----------------------|-----------------------|-------------|----------|
| Total                         | 1.49199e-12 (1.00 )   | 1.49199e-12 (1.00 )   |             |          |
| Formation of rad19            | 1.30395e-12 (0.874 )  | 1.30394e-12 (0.874 )  |             |          |
| H-abstraction to cyc2enyl     | 1.56554e-13 (0.105 )  | 1.56554e-13 (0.105 )  |             |          |
| H-abstraction to cyclenyl     | 3.14892e-14 (0.0211 ) | 3.14890e-14 (0.0211 ) |             |          |
| species                       | PYtrue                | Cumul                 | PYeffective | Cumul    |
| Indene+H                      | 0.848699              | 0.848699              | 0.848703    | 0.848703 |
| Benzene+cycloprop-2-enylidene | 0.104929              | 0.953628              | 0.104930    | 0.953634 |
| PhCHCCH2+H                    | 0.0222941             | 0.975922              | 0.0222941   | 0.975928 |
| Benzene+cycloprop-1-enylidene | 0.0211054             | 0.997028              | 0.0211054   | 0.997033 |
| C2H2+PhCH2                    | 0.000683868           | 0.997712              | 0.000683871 | 0.997717 |
| Ph+MeAc                       | 0.000643403           | 0.998355              | 0.000643406 | 0.998360 |
| Ph+Allene                     | 0.000474185           | 0.998829              | 0.000474187 | 0.998835 |
| PhCCCH3+H                     | 0.000337156           | 0.999166              | 0.000337157 | 0.999172 |
| PhCCH+CH3                     | 0.000266833           | 0.999433              | 0.000266834 | 0.999439 |
| rad67                         | 0.000208252           | 0.999641              | 0.000208253 | 0.999647 |
| PhCH2CCH+H                    | 0.000196562           | 0.999838              | 0.000196563 | 0.999843 |
| rad35                         | 7.58728e-05           | 0.999914              | 7.58733e-05 | 0.999919 |
| PhcycC3H3_A+H                 | 2.42103e-05           | 0.999938              | 2.42105e-05 | 0.999943 |
| PAH7+H                        | 1.88375e-05           | 0.999957              | 1.88376e-05 | 0.999962 |
| PhcycC3H3_B+H                 | 1.21561e-05           | 0.999969              | 1.21561e-05 | 0.999974 |
| rad37                         | 1.14050e-05           | 0.999980              | 1.14050e-05 | 0.999986 |
| Phenyl+cycC3H4                | 5.07995e-06           | 0.999986              | 0.00000     | 0.999986 |
| PAH10+CH3                     | 4.40461e-06           | 0.999990              | 4.40463e-06 | 0.999996 |
| rad39                         | 3.79886e-06           | 0.999994              | 3.79888e-06 | 0.999994 |
| rad30                         | 2.25163e-06           | 0.999996              | 2.25165e-06 | 0.999996 |
| PAH9+H                        | 1.48864e-06           | 0.999997              | 1.48865e-06 | 0.999998 |
| rad38                         | 1.36505e-06           | 0.999999              | 1.36505e-06 | 0.999999 |
| PAH3+H                        | 6.06186e-07           | 0.999999              | 6.06189e-07 | 1.000000 |
| rad46                         | 1.39482e-07           | 1.000000              | 1.39483e-07 | 1.000000 |
| rad60syn                      | 1.03783e-07           | 1.000000              | 1.03784e-07 | 1.000000 |
| rad54                         | 1.00666e-07           | 1.000000              | 1.00667e-07 | 1.000000 |
| rad59                         | 7.22570e-08           | 1.000000              | 7.22573e-08 | 1.000000 |
| rad60anti                     | 6.13421e-08           | 1.000000              | 6.13425e-08 | 1.000000 |
| rad50                         | 4.00788e-08           | 1.000000              | 4.00791e-08 | 1.000000 |
| PAH1+H                        | 3.94732e-08           | 1.000000              | 3.94734e-08 | 1.000000 |
| rad43                         | 2.87031e-08           | 1.000000              | 2.87033e-08 | 1.000000 |
| rad70                         | 1.65408e-08           | 1.000000              | 1.65408e-08 | 1.000000 |
| rad55                         | 5.38699e-09           | 1.000000              | 5.38702e-09 | 1.000000 |
| rad51                         | 4.77134e-09           | 1.000000              | 4.77137e-09 | 1.000000 |
| rad62                         | 3.44637e-09           | 1.000000              | 3.44638e-09 | 1.000000 |
| rad34                         | 2.67892e-09           | 1.000000              | 2.67894e-09 | 1.000000 |
| rad52                         | 2.25237e-09           | 1.000000              | 2.25238e-09 | 1.000000 |
| rad58                         | 2.20457e-09           | 1.000000              | 2.20458e-09 | 1.000000 |
| rad61                         | 1.06256e-09           | 1.000000              | 1.06257e-09 | 1.000000 |

|           |             |         |             |         |
|-----------|-------------|---------|-------------|---------|
| rad41     | 6.91191e-10 | 1.00000 | 6.91194e-10 | 1.00000 |
| rad53     | 4.12665e-10 | 1.00000 | 4.12668e-10 | 1.00000 |
| rad56     | 2.12371e-10 | 1.00000 | 2.12372e-10 | 1.00000 |
| rad64     | 1.54860e-10 | 1.00000 | 1.54860e-10 | 1.00000 |
| rad65     | 1.50319e-10 | 1.00000 | 1.50320e-10 | 1.00000 |
| rad42     | 1.03376e-10 | 1.00000 | 1.03377e-10 | 1.00000 |
| PAH8+H    | 5.91171e-11 | 1.00000 | 5.91174e-11 | 1.00000 |
| rad68syn  | 4.07131e-11 | 1.00000 | 4.07134e-11 | 1.00000 |
| rad68anti | 2.70946e-11 | 1.00000 | 2.70946e-11 | 1.00000 |
| rad40syn  | 1.56733e-11 | 1.00000 | 1.56733e-11 | 1.00000 |
| rad40anti | 1.17159e-11 | 1.00000 | 1.17159e-11 | 1.00000 |
| rad73     | 1.01666e-11 | 1.00000 | 1.01667e-11 | 1.00000 |
| rad71     | 6.75145e-12 | 1.00000 | 6.75148e-12 | 1.00000 |
| rad9      | 2.38921e-13 | 1.00000 | 2.38922e-13 | 1.00000 |
| rad72     | 3.83062e-14 | 1.00000 | 3.83064e-14 | 1.00000 |
| rad12     | 4.04546e-16 | 1.00000 | 4.04549e-16 | 1.00000 |
| rad19anti | 4.57501e-17 | 1.00000 | 4.57503e-17 | 1.00000 |
| rad23     | 3.96788e-17 | 1.00000 | 3.96790e-17 | 1.00000 |
| rad15     | 3.86181e-17 | 1.00000 | 3.86182e-17 | 1.00000 |
| rad2      | 2.40987e-17 | 1.00000 | 2.40989e-17 | 1.00000 |
| rad45     | 1.86520e-17 | 1.00000 | 1.86522e-17 | 1.00000 |
| rad1      | 7.35588e-18 | 1.00000 | 7.35592e-18 | 1.00000 |
| rad36     | 2.09334e-18 | 1.00000 | 2.09335e-18 | 1.00000 |
| rad19syn  | 1.51735e-18 | 1.00000 | 1.51736e-18 | 1.00000 |
| rad6      | 1.09735e-18 | 1.00000 | 1.09736e-18 | 1.00000 |
| rad10     | 5.00333e-19 | 1.00000 | 5.00335e-19 | 1.00000 |
| rad3      | 2.73942e-19 | 1.00000 | 2.73943e-19 | 1.00000 |
| rad4      | 2.27422e-19 | 1.00000 | 2.27424e-19 | 1.00000 |
| rad21     | 1.24312e-20 | 1.00000 | 1.24313e-20 | 1.00000 |
| rad24     | 8.13232e-21 | 1.00000 | 8.13237e-21 | 1.00000 |
| rad20     | 2.39353e-21 | 1.00000 | 2.39354e-21 | 1.00000 |
| rad31     | 1.88477e-21 | 1.00000 | 1.88478e-21 | 1.00000 |
| rad33     | 1.64389e-21 | 1.00000 | 1.64391e-21 | 1.00000 |
| rad8      | 5.47269e-22 | 1.00000 | 5.47271e-22 | 1.00000 |
| rad13     | 3.48024e-22 | 1.00000 | 3.48026e-22 | 1.00000 |
| rad7      | 2.09059e-22 | 1.00000 | 2.09060e-22 | 1.00000 |
| rad11     | 7.32834e-23 | 1.00000 | 7.32838e-23 | 1.00000 |
| rad26     | 3.61199e-23 | 1.00000 | 3.61201e-23 | 1.00000 |
| rad25     | 2.46143e-23 | 1.00000 | 2.46143e-23 | 1.00000 |
| rad27     | 2.21054e-23 | 1.00000 | 2.21055e-23 | 1.00000 |
| rad28     | 2.11043e-23 | 1.00000 | 2.11045e-23 | 1.00000 |
| rad47     | 4.17543e-24 | 1.00000 | 4.17545e-24 | 1.00000 |
| rad22     | 2.50778e-24 | 1.00000 | 2.50780e-24 | 1.00000 |
| rad14     | 1.65935e-24 | 1.00000 | 1.65935e-24 | 1.00000 |
| rad18     | 1.59720e-26 | 1.00000 | 1.59721e-26 | 1.00000 |
| rad5      | 1.56206e-31 | 1.00000 | 1.56207e-31 | 1.00000 |

0.100000000E-06 Pa, 1000.00000 K

=====

| Rate constant             | True (fraction)       | Effective (fraction)  |
|---------------------------|-----------------------|-----------------------|
| Total                     | 2.07591e-12 (1.00 )   | 2.07587e-12 (1.00 )   |
| Formation of rad19        | 1.74189e-12 (0.839 )  | 1.74186e-12 (0.839 )  |
| H-abstraction to cyc2enyl | 2.68753e-13 (0.129 )  | 2.68753e-13 (0.129 )  |
| H-abstraction to cyc1enyl | 6.52627e-14 (0.0314 ) | 6.52614e-14 (0.0314 ) |

| species                       | PYtrue      | Cumul    | PYeffective | Cumul    |
|-------------------------------|-------------|----------|-------------|----------|
| Indene+H                      | 0.799582    | 0.799582 | 0.799596    | 0.799596 |
| Benzene+cycloprop-2-enylidene | 0.129463    | 0.929045 | 0.129465    | 0.929061 |
| PhCHCCH2+H                    | 0.0345727   | 0.963618 | 0.0345733   | 0.963635 |
| Benzene+cycloprop-1-enylidene | 0.0314382   | 0.995056 | 0.0314381   | 0.995073 |
| C2H2+PhCH2                    | 0.00107013  | 0.996126 | 0.00107014  | 0.996143 |
| Ph+MeAc                       | 0.00105356  | 0.997180 | 0.00105357  | 0.997197 |
| Ph+Allene                     | 0.000856132 | 0.998036 | 0.000856147 | 0.998053 |
| PhCCCH3+H                     | 0.000518388 | 0.998554 | 0.000518396 | 0.998571 |
| PhCH2CCH+H                    | 0.000387329 | 0.998942 | 0.000387336 | 0.998958 |
| PhCCH+CH3                     | 0.000373412 | 0.999315 | 0.000373419 | 0.999332 |
| rad67                         | 0.000352154 | 0.999667 | 0.000352160 | 0.999684 |
| rad35                         | 0.000127506 | 0.999795 | 0.000127508 | 0.999812 |
| PhcycC3H3_A+H                 | 6.68787e-05 | 0.999862 | 6.68799e-05 | 0.999878 |
| PhcycC3H3_B+H                 | 3.94287e-05 | 0.999901 | 3.94293e-05 | 0.999918 |
| PAH7+H                        | 3.02070e-05 | 0.999931 | 3.02075e-05 | 0.999948 |
| rad37                         | 2.12565e-05 | 0.999953 | 2.12568e-05 | 0.999969 |
| Phenyl+cycC3H4                | 1.68078e-05 | 0.999969 | 0.00000     | 0.999969 |
| PAH10+CH3                     | 1.12446e-05 | 0.999981 | 1.12447e-05 | 0.999981 |
| rad39                         | 5.81024e-06 | 0.999986 | 5.81034e-06 | 0.999986 |
| rad30                         | 4.04406e-06 | 0.999990 | 4.04413e-06 | 0.999990 |
| PAH9+H                        | 3.29361e-06 | 0.999994 | 3.29367e-06 | 0.999994 |
| rad38                         | 3.08261e-06 | 0.999997 | 3.08266e-06 | 0.999997 |

|           |             |          |             |          |
|-----------|-------------|----------|-------------|----------|
| PAH3+H    | 1.54070e-06 | 0.999998 | 1.54073e-06 | 0.999998 |
| rad46     | 3.42239e-07 | 0.999999 | 3.42245e-07 | 0.999999 |
| rad54     | 2.28520e-07 | 0.999999 | 2.28524e-07 | 0.999999 |
| rad60syn  | 2.23169e-07 | 0.999999 | 2.23173e-07 | 0.999999 |
| rad59     | 1.76070e-07 | 0.999999 | 1.76073e-07 | 0.999999 |
| rad60anti | 1.33518e-07 | 1.000000 | 1.33520e-07 | 0.999999 |
| rad50     | 1.25826e-07 | 1.000000 | 1.25828e-07 | 1.000000 |
| PAH1+H    | 1.15144e-07 | 1.000000 | 1.15145e-07 | 1.000000 |
| rad43     | 6.59875e-08 | 1.000000 | 6.59887e-08 | 1.000000 |
| rad70     | 4.32135e-08 | 1.000000 | 4.32143e-08 | 1.000000 |
| rad51     | 1.82048e-08 | 1.000000 | 1.82051e-08 | 1.000000 |
| rad55     | 1.31137e-08 | 1.000000 | 1.31139e-08 | 1.000000 |
| rad52     | 7.79283e-09 | 1.000000 | 7.79297e-09 | 1.000000 |
| rad34     | 7.69222e-09 | 1.000000 | 7.69236e-09 | 1.000000 |
| rad58     | 7.06658e-09 | 1.000000 | 7.06670e-09 | 1.000000 |
| rad62     | 7.03940e-09 | 1.000000 | 7.03953e-09 | 1.000000 |
| rad61     | 4.12272e-09 | 1.000000 | 4.12278e-09 | 1.000000 |
| rad41     | 2.02447e-09 | 1.000000 | 2.02451e-09 | 1.000000 |
| rad53     | 1.31432e-09 | 1.000000 | 1.31434e-09 | 1.000000 |
| rad56     | 7.88428e-10 | 1.000000 | 7.88442e-10 | 1.000000 |
| rad65     | 5.65099e-10 | 1.000000 | 5.65110e-10 | 1.000000 |
| rad64     | 4.71855e-10 | 1.000000 | 4.71863e-10 | 1.000000 |
| PAH8+H    | 3.09749e-10 | 1.000000 | 3.09755e-10 | 1.000000 |
| rad42     | 2.59222e-10 | 1.000000 | 2.59226e-10 | 1.000000 |
| rad68syn  | 1.64237e-10 | 1.000000 | 1.64240e-10 | 1.000000 |
| rad68anti | 1.08793e-10 | 1.000000 | 1.08795e-10 | 1.000000 |
| rad40syn  | 7.30616e-11 | 1.000000 | 7.30628e-11 | 1.000000 |
| rad73     | 6.65983e-11 | 1.000000 | 6.65995e-11 | 1.000000 |
| rad40anti | 5.52183e-11 | 1.000000 | 5.52193e-11 | 1.000000 |
| rad71     | 5.18856e-11 | 1.000000 | 5.18865e-11 | 1.000000 |
| rad72     | 4.47183e-13 | 1.000000 | 4.47191e-13 | 1.000000 |
| rad9      | 4.35699e-13 | 1.000000 | 4.35706e-13 | 1.000000 |
| rad12     | 7.27750e-16 | 1.000000 | 7.27764e-16 | 1.000000 |
| rad15     | 5.89437e-17 | 1.000000 | 5.89448e-17 | 1.000000 |
| rad23     | 3.96862e-17 | 1.000000 | 3.96869e-17 | 1.000000 |
| rad19anti | 3.42048e-17 | 1.000000 | 3.42054e-17 | 1.000000 |
| rad45     | 2.12529e-17 | 1.000000 | 2.12533e-17 | 1.000000 |
| rad2      | 2.02391e-17 | 1.000000 | 2.02394e-17 | 1.000000 |
| rad1      | 6.07902e-18 | 1.000000 | 6.07912e-18 | 1.000000 |
| rad36     | 2.26401e-18 | 1.000000 | 2.26404e-18 | 1.000000 |
| rad19syn  | 1.42443e-18 | 1.000000 | 1.42446e-18 | 1.000000 |
| rad6      | 8.24402e-19 | 1.000000 | 8.24416e-19 | 1.000000 |
| rad10     | 4.19736e-19 | 1.000000 | 4.19743e-19 | 1.000000 |
| rad21     | 2.11576e-19 | 1.000000 | 2.11580e-19 | 1.000000 |
| rad3      | 2.07237e-19 | 1.000000 | 2.07241e-19 | 1.000000 |
| rad4      | 1.71461e-19 | 1.000000 | 1.71464e-19 | 1.000000 |
| rad8      | 6.27706e-20 | 1.000000 | 6.27717e-20 | 1.000000 |
| rad20     | 4.93245e-20 | 1.000000 | 4.93254e-20 | 1.000000 |
| rad24     | 3.61522e-20 | 1.000000 | 3.61528e-20 | 1.000000 |
| rad33     | 2.31462e-20 | 1.000000 | 2.31466e-20 | 1.000000 |
| rad13     | 2.20327e-20 | 1.000000 | 2.20331e-20 | 1.000000 |
| rad31     | 2.18570e-21 | 1.000000 | 2.18575e-21 | 1.000000 |
| rad11     | 1.11839e-21 | 1.000000 | 1.11842e-21 | 1.000000 |
| rad25     | 7.69190e-22 | 1.000000 | 7.69203e-22 | 1.000000 |
| rad27     | 5.63064e-22 | 1.000000 | 5.63073e-22 | 1.000000 |
| rad7      | 2.21455e-22 | 1.000000 | 2.21459e-22 | 1.000000 |
| rad14     | 4.01739e-23 | 1.000000 | 4.01747e-23 | 1.000000 |
| rad26     | 2.60409e-23 | 1.000000 | 2.60414e-23 | 1.000000 |
| rad47     | 1.62908e-23 | 1.000000 | 1.62911e-23 | 1.000000 |
| rad28     | 1.51592e-23 | 1.000000 | 1.51595e-23 | 1.000000 |
| rad18     | 4.29924e-24 | 1.000000 | 4.29931e-24 | 1.000000 |
| rad22     | 2.91737e-24 | 1.000000 | 2.91742e-24 | 1.000000 |
| rad5      | 2.69858e-30 | 1.000000 | 2.69863e-30 | 1.000000 |

0.100000000E-06 Pa, 1100.00000 K

=====

| Rate constant             | True (fraction)       | Effective (fraction)  |
|---------------------------|-----------------------|-----------------------|
| Total                     | 2.81236e-12 (1.00 )   | 2.81222e-12 (1.00 )   |
| Formation of rad19        | 2.25993e-12 (0.804 )  | 2.25980e-12 (0.804 )  |
| H-abstraction to cyc2enyl | 4.30538e-13 (0.153 )  | 4.30538e-13 (0.153 )  |
| H-abstraction to cyclenyl | 1.21896e-13 (0.0433 ) | 1.21889e-13 (0.0433 ) |

| species                       | PYtrue     | Cumul    | PYeffective | Cumul    |
|-------------------------------|------------|----------|-------------|----------|
| Indene+H                      | 0.745455   | 0.745455 | 0.745493    | 0.745493 |
| Benzene+cycloprop-2-enylidene | 0.153088   | 0.898543 | 0.153095    | 0.898588 |
| PhCHCCH2+H                    | 0.0504085  | 0.948951 | 0.0504110   | 0.948999 |
| Benzene+cycloprop-1-enylidene | 0.0433429  | 0.992294 | 0.0433425   | 0.992342 |
| Ph+MeAc                       | 0.00159989 | 0.993894 | 0.00159997  | 0.993942 |

|                |             |          |             |          |
|----------------|-------------|----------|-------------|----------|
| C2H2+PhCH2     | 0.00157393  | 0.995468 | 0.00157401  | 0.995516 |
| Ph+Alkene      | 0.00139377  | 0.996862 | 0.00139384  | 0.996909 |
| PhCCCH3+H      | 0.000746146 | 0.997608 | 0.000746184 | 0.997656 |
| PhCH2CCH+H     | 0.000685299 | 0.998293 | 0.000685333 | 0.998341 |
| rad67          | 0.000551509 | 0.998845 | 0.000551537 | 0.998892 |
| PhCCH+CH3      | 0.000499927 | 0.999345 | 0.000499952 | 0.999392 |
| rad35          | 0.000198904 | 0.999544 | 0.000198914 | 0.999591 |
| PhcycC3H3_A+H  | 0.000160985 | 0.999705 | 0.000160994 | 0.999752 |
| PhcycC3H3_B+H  | 0.000108569 | 0.999813 | 0.000108575 | 0.999861 |
| Phenyl+cycC3H4 | 4.74535e-05 | 0.999861 | 0.000000    | 0.999861 |
| PAH7+H         | 4.44306e-05 | 0.999905 | 4.44328e-05 | 0.999905 |
| rad37          | 3.57976e-05 | 0.999941 | 3.57993e-05 | 0.999941 |
| PAH10+CH3      | 2.47740e-05 | 0.999966 | 2.47753e-05 | 0.999966 |
| rad39          | 8.15502e-06 | 0.999974 | 8.15543e-06 | 0.999974 |
| rad30          | 6.70503e-06 | 0.999981 | 6.70536e-06 | 0.999981 |
| PAH9+H         | 6.62670e-06 | 0.999987 | 6.62703e-06 | 0.999987 |
| rad38          | 6.20641e-06 | 0.999993 | 6.20672e-06 | 0.999994 |
| PAH3+H         | 3.44988e-06 | 0.999997 | 3.45006e-06 | 0.999997 |
| rad46          | 7.53032e-07 | 0.999998 | 7.53070e-07 | 0.999998 |
| rad54          | 4.48842e-07 | 0.999998 | 4.48864e-07 | 0.999998 |
| rad60syn       | 4.32688e-07 | 0.999998 | 4.32709e-07 | 0.999999 |
| rad59          | 3.79560e-07 | 0.999999 | 3.79579e-07 | 0.999999 |
| rad50          | 3.42341e-07 | 0.999999 | 3.42358e-07 | 0.999999 |
| PAH1+H         | 2.85109e-07 | 0.999999 | 2.85123e-07 | 1.000000 |
| rad60anti      | 2.61576e-07 | 1.000000 | 2.61589e-07 | 1.000000 |
| rad43          | 1.34197e-07 | 1.000000 | 1.34204e-07 | 1.000000 |
| rad70          | 9.71315e-08 | 1.000000 | 9.71362e-08 | 1.000000 |
| rad51          | 5.83466e-08 | 1.000000 | 5.83495e-08 | 1.000000 |
| rad55          | 2.73128e-08 | 1.000000 | 2.73142e-08 | 1.000000 |
| rad52          | 2.29834e-08 | 1.000000 | 2.29845e-08 | 1.000000 |
| rad58          | 1.92024e-08 | 1.000000 | 1.92034e-08 | 1.000000 |
| rad34          | 1.87451e-08 | 1.000000 | 1.87461e-08 | 1.000000 |
| rad61          | 1.28390e-08 | 1.000000 | 1.28397e-08 | 1.000000 |
| rad62          | 1.28154e-08 | 1.000000 | 1.28161e-08 | 1.000000 |
| rad41          | 5.04814e-09 | 1.000000 | 5.04840e-09 | 1.000000 |
| rad53          | 3.43664e-09 | 1.000000 | 3.43682e-09 | 1.000000 |
| rad56          | 2.33966e-09 | 1.000000 | 2.33978e-09 | 1.000000 |
| rad65          | 1.78385e-09 | 1.000000 | 1.78394e-09 | 1.000000 |
| PAH8+H         | 1.24981e-09 | 1.000000 | 1.24987e-09 | 1.000000 |
| rad64          | 1.19311e-09 | 1.000000 | 1.19317e-09 | 1.000000 |
| rad42          | 5.61778e-10 | 1.000000 | 5.61806e-10 | 1.000000 |
| rad68syn       | 5.31777e-10 | 1.000000 | 5.31804e-10 | 1.000000 |
| rad68anti      | 3.50889e-10 | 1.000000 | 3.50907e-10 | 1.000000 |
| rad73          | 3.32910e-10 | 1.000000 | 3.32927e-10 | 1.000000 |
| rad71          | 2.96145e-10 | 1.000000 | 2.96160e-10 | 1.000000 |
| rad40syn       | 2.67659e-10 | 1.000000 | 2.67672e-10 | 1.000000 |
| rad40anti      | 2.04456e-10 | 1.000000 | 2.04466e-10 | 1.000000 |
| rad72          | 3.56687e-12 | 1.000000 | 3.56704e-12 | 1.000000 |
| rad9           | 4.00858e-13 | 1.000000 | 4.00879e-13 | 1.000000 |
| rad12          | 7.93739e-16 | 1.000000 | 7.93778e-16 | 1.000000 |
| rad15          | 4.97201e-17 | 1.000000 | 4.97226e-17 | 1.000000 |
| rad23          | 3.76151e-17 | 1.000000 | 3.76170e-17 | 1.000000 |
| rad19anti      | 2.56276e-17 | 1.000000 | 2.56289e-17 | 1.000000 |
| rad45          | 2.19359e-17 | 1.000000 | 2.19370e-17 | 1.000000 |
| rad2           | 1.59960e-17 | 1.000000 | 1.59968e-17 | 1.000000 |
| rad1           | 4.72619e-18 | 1.000000 | 4.72643e-18 | 1.000000 |
| rad36          | 2.28769e-18 | 1.000000 | 2.28781e-18 | 1.000000 |
| rad19syn       | 1.28391e-18 | 1.000000 | 1.28398e-18 | 1.000000 |
| rad21          | 9.63737e-19 | 1.000000 | 9.63784e-19 | 1.000000 |
| rad6           | 8.28416e-19 | 1.000000 | 8.28456e-19 | 1.000000 |
| rad8           | 7.65078e-19 | 1.000000 | 7.65117e-19 | 1.000000 |
| rad10          | 3.34076e-19 | 1.000000 | 3.34093e-19 | 1.000000 |
| rad13          | 3.15542e-19 | 1.000000 | 3.15558e-19 | 1.000000 |
| rad20          | 2.48655e-19 | 1.000000 | 2.48667e-19 | 1.000000 |
| rad3           | 1.50472e-19 | 1.000000 | 1.50480e-19 | 1.000000 |
| rad4           | 1.23800e-19 | 1.000000 | 1.23806e-19 | 1.000000 |
| rad33          | 8.69060e-20 | 1.000000 | 8.69109e-20 | 1.000000 |
| rad24          | 7.72326e-20 | 1.000000 | 7.72364e-20 | 1.000000 |
| rad11          | 5.53380e-20 | 1.000000 | 5.53408e-20 | 1.000000 |
| rad25          | 7.88055e-21 | 1.000000 | 7.88094e-21 | 1.000000 |
| rad27          | 4.73302e-21 | 1.000000 | 4.73325e-21 | 1.000000 |
| rad31          | 2.41068e-21 | 1.000000 | 2.41079e-21 | 1.000000 |
| rad7           | 2.07691e-21 | 1.000000 | 2.07702e-21 | 1.000000 |
| rad18          | 4.94611e-22 | 1.000000 | 4.94636e-22 | 1.000000 |
| rad14          | 3.73375e-22 | 1.000000 | 3.73394e-22 | 1.000000 |
| rad47          | 5.24230e-23 | 1.000000 | 5.24256e-23 | 1.000000 |
| rad26          | 2.13334e-23 | 1.000000 | 2.13345e-23 | 1.000000 |
| rad28          | 1.12776e-23 | 1.000000 | 1.12782e-23 | 1.000000 |
| rad22          | 3.31105e-24 | 1.000000 | 3.31121e-24 | 1.000000 |
| rad5           | 8.65243e-29 | 1.000000 | 8.65292e-29 | 1.000000 |

0.100000000E-06 Pa, 1200.00000 K

=====

| Rate constant             | True (fraction)       | Effective (fraction)  |
|---------------------------|-----------------------|-----------------------|
| Total                     | 3.72623e-12 (1.00 )   | 3.72576e-12 (1.00 )   |
| Formation of rad19        | 2.86288e-12 (0.768 )  | 2.86245e-12 (0.768 )  |
| H-abstraction to cyc2enyl | 6.53266e-13 (0.175 )  | 6.53266e-13 (0.175 )  |
| H-abstraction to cyclenyl | 2.10085e-13 (0.0564 ) | 2.10053e-13 (0.0564 ) |

| species                       | PYtrue      | Cumul    | PYeffective | Cumul    |
|-------------------------------|-------------|----------|-------------|----------|
| Indene+H                      | 0.687506    | 0.687506 | 0.687593    | 0.687593 |
| Benzene+cycloprop-2-enylidene | 0.175315    | 0.862821 | 0.175337    | 0.862930 |
| PhCHCCH2+H                    | 0.0694470   | 0.932268 | 0.0694557   | 0.932386 |
| Benzene+cycloprop-1-enylidene | 0.0563801   | 0.988648 | 0.0563786   | 0.988764 |
| Ph+MeAc                       | 0.00227272  | 0.990921 | 0.00227301  | 0.991037 |
| C2H2+PhCH2                    | 0.00219121  | 0.993112 | 0.00219148  | 0.993229 |
| Ph+Allene                     | 0.00207994  | 0.995192 | 0.00208020  | 0.995309 |
| PhCH2CCH+H                    | 0.00110691  | 0.996299 | 0.00110706  | 0.996416 |
| PhCCCH3+H                     | 0.00101200  | 0.997311 | 0.00101213  | 0.997428 |
| rad67                         | 0.000806305 | 0.998117 | 0.000806406 | 0.998235 |
| PhCCH+CH3                     | 0.000645716 | 0.998763 | 0.000645798 | 0.998880 |
| PhcycC3H3_A+H                 | 0.000345598 | 0.999109 | 0.000345641 | 0.999226 |
| rad35                         | 0.000290169 | 0.999399 | 0.000290206 | 0.999516 |
| PhcycC3H3_B+H                 | 0.000261273 | 0.999660 | 0.000261306 | 0.999778 |
| Phenyl+cycC3H4                | 0.000117514 | 0.999778 | 0.000000    | 0.999778 |
| PAH7+H                        | 6.09151e-05 | 0.999838 | 6.09229e-05 | 0.999839 |
| rad37                         | 5.50993e-05 | 0.999894 | 5.51063e-05 | 0.999894 |
| PAH10+CH3                     | 4.81021e-05 | 0.999942 | 4.81082e-05 | 0.999942 |
| PAH9+H                        | 1.22285e-05 | 0.999954 | 1.22300e-05 | 0.999954 |
| rad38                         | 1.12958e-05 | 0.999965 | 1.12972e-05 | 0.999965 |
| rad39                         | 1.06983e-05 | 0.999976 | 1.06996e-05 | 0.999976 |
| rad30                         | 1.03391e-05 | 0.999986 | 1.03403e-05 | 0.999986 |
| PAH3+H                        | 6.91379e-06 | 0.999993 | 6.91466e-06 | 0.999993 |
| rad46                         | 1.50176e-06 | 0.999995 | 1.50195e-06 | 0.999995 |
| rad50                         | 8.20642e-07 | 0.999995 | 8.20743e-07 | 0.999996 |
| rad54                         | 7.81497e-07 | 0.999996 | 7.81598e-07 | 0.999996 |
| rad60syn                      | 7.65102e-07 | 0.999997 | 7.65199e-07 | 0.999997 |
| rad59                         | 7.35018e-07 | 0.999998 | 7.35111e-07 | 0.999998 |
| PAH1+H                        | 6.15259e-07 | 0.999998 | 6.15337e-07 | 0.999998 |
| rad60anti                     | 4.66711e-07 | 0.999999 | 4.66769e-07 | 0.999999 |
| rad43                         | 2.45550e-07 | 0.999999 | 2.45581e-07 | 0.999999 |
| rad70                         | 1.92605e-07 | 0.999999 | 1.92629e-07 | 0.999999 |
| rad51                         | 1.60721e-07 | 0.999999 | 1.60741e-07 | 1.000000 |
| rad52                         | 5.89508e-08 | 1.000000 | 5.89583e-08 | 1.000000 |
| rad55                         | 4.99974e-08 | 1.000000 | 5.00038e-08 | 1.000000 |
| rad58                         | 4.53331e-08 | 1.000000 | 4.53389e-08 | 1.000000 |
| rad34                         | 3.98655e-08 | 1.000000 | 3.98705e-08 | 1.000000 |
| rad61                         | 3.33579e-08 | 1.000000 | 3.33621e-08 | 1.000000 |
| rad62                         | 2.11968e-08 | 1.000000 | 2.11994e-08 | 1.000000 |
| rad41                         | 1.09917e-08 | 1.000000 | 1.09931e-08 | 1.000000 |
| rad53                         | 7.65059e-09 | 1.000000 | 7.65156e-09 | 1.000000 |
| rad56                         | 5.79402e-09 | 1.000000 | 5.79474e-09 | 1.000000 |
| rad65                         | 4.84114e-09 | 1.000000 | 4.84175e-09 | 1.000000 |
| PAH8+H                        | 4.08163e-09 | 1.000000 | 4.08215e-09 | 1.000000 |
| rad64                         | 2.59994e-09 | 1.000000 | 2.60027e-09 | 1.000000 |
| rad68syn                      | 1.43965e-09 | 1.000000 | 1.43983e-09 | 1.000000 |
| rad73                         | 1.32831e-09 | 1.000000 | 1.32847e-09 | 1.000000 |
| rad71                         | 1.32075e-09 | 1.000000 | 1.32091e-09 | 1.000000 |
| rad42                         | 1.07985e-09 | 1.000000 | 1.07999e-09 | 1.000000 |
| rad68anti                     | 9.46805e-10 | 1.000000 | 9.46926e-10 | 1.000000 |
| rad40syn                      | 8.05959e-10 | 1.000000 | 8.06061e-10 | 1.000000 |
| rad40anti                     | 6.21769e-10 | 1.000000 | 6.21848e-10 | 1.000000 |
| rad72                         | 2.08613e-11 | 1.000000 | 2.08640e-11 | 1.000000 |
| rad9                          | 2.92174e-13 | 1.000000 | 2.92211e-13 | 1.000000 |
| rad12                         | 7.13600e-16 | 1.000000 | 7.13690e-16 | 1.000000 |
| rad15                         | 3.90915e-17 | 1.000000 | 3.90964e-17 | 1.000000 |
| rad23                         | 3.46220e-17 | 1.000000 | 3.46263e-17 | 1.000000 |
| rad45                         | 2.14392e-17 | 1.000000 | 2.14420e-17 | 1.000000 |
| rad19anti                     | 1.93811e-17 | 1.000000 | 1.93836e-17 | 1.000000 |
| rad2                          | 1.21883e-17 | 1.000000 | 1.21898e-17 | 1.000000 |
| rad1                          | 3.58036e-18 | 1.000000 | 3.58082e-18 | 1.000000 |
| rad8                          | 2.53541e-18 | 1.000000 | 2.53574e-18 | 1.000000 |
| rad36                         | 2.22511e-18 | 1.000000 | 2.22539e-18 | 1.000000 |
| rad21                         | 2.06285e-18 | 1.000000 | 2.06311e-18 | 1.000000 |
| rad6                          | 1.27629e-18 | 1.000000 | 1.27646e-18 | 1.000000 |
| rad13                         | 1.26206e-18 | 1.000000 | 1.26222e-18 | 1.000000 |
| rad19syn                      | 1.13955e-18 | 1.000000 | 1.13970e-18 | 1.000000 |
| rad11                         | 9.72566e-19 | 1.000000 | 9.72686e-19 | 1.000000 |

|       |             |          |             |          |
|-------|-------------|----------|-------------|----------|
| rad20 | 5.30461e-19 | 1.000000 | 5.30528e-19 | 1.000000 |
| rad10 | 2.99570e-19 | 1.000000 | 2.99607e-19 | 1.000000 |
| rad33 | 1.49700e-19 | 1.000000 | 1.49719e-19 | 1.000000 |
| rad24 | 1.18501e-19 | 1.000000 | 1.18516e-19 | 1.000000 |
| rad3  | 1.06950e-19 | 1.000000 | 1.06963e-19 | 1.000000 |
| rad4  | 8.75614e-20 | 1.000000 | 8.75729e-20 | 1.000000 |
| rad7  | 6.84585e-20 | 1.000000 | 6.84671e-20 | 1.000000 |
| rad25 | 2.92600e-20 | 1.000000 | 2.92637e-20 | 1.000000 |
| rad18 | 1.64154e-20 | 1.000000 | 1.64175e-20 | 1.000000 |
| rad27 | 1.52386e-20 | 1.000000 | 1.52405e-20 | 1.000000 |
| rad31 | 2.55729e-21 | 1.000000 | 2.55762e-21 | 1.000000 |
| rad14 | 1.32731e-21 | 1.000000 | 1.32747e-21 | 1.000000 |
| rad47 | 1.43379e-22 | 1.000000 | 1.43397e-22 | 1.000000 |
| rad26 | 6.61264e-23 | 1.000000 | 6.61347e-23 | 1.000000 |
| rad28 | 9.79443e-24 | 1.000000 | 9.79562e-24 | 1.000000 |
| rad22 | 3.66423e-24 | 1.000000 | 3.66469e-24 | 1.000000 |
| rad5  | 4.26033e-27 | 1.000000 | 4.26087e-27 | 1.000000 |

0.100000000E-06 Pa, 1300.00000 K

| Rate constant             | True (fraction)       | Effective (fraction)  |
|---------------------------|-----------------------|-----------------------|
| Total                     | 4.84401e-12 (1.00 )   | 4.84262e-12 (1.00 )   |
| Formation of rad19        | 3.55537e-12 (0.734 )  | 3.55411e-12 (0.734 )  |
| H-abstraction to cyc2enyl | 9.48893e-13 (0.196 )  | 9.48893e-13 (0.196 )  |
| H-abstraction to cyclenyl | 3.39740e-13 (0.0701 ) | 3.39620e-13 (0.0701 ) |

| species                       | PYtrue      | Cumul    | PYeffective | Cumul    |
|-------------------------------|-------------|----------|-------------|----------|
| Indene+H                      | 0.627161    | 0.627161 | 0.627340    | 0.627340 |
| Benzene+cycloprop-2-enylidene | 0.195890    | 0.823052 | 0.195946    | 0.823286 |
| PhCHCCH2+H                    | 0.0908777   | 0.913929 | 0.0909037   | 0.914190 |
| Benzene+cycloprop-1-enylidene | 0.0701362   | 0.984065 | 0.0701313   | 0.984321 |
| Ph+MeAc                       | 0.00304441  | 0.987110 | 0.00304527  | 0.987366 |
| C2H2+PhCH2                    | 0.00290372  | 0.990014 | 0.00290454  | 0.990271 |
| Ph+Allene                     | 0.00288470  | 0.992898 | 0.00288553  | 0.993157 |
| PhCH2CCH+H                    | 0.00165448  | 0.994553 | 0.00165495  | 0.994812 |
| PhCCCH3+H                     | 0.00130153  | 0.995854 | 0.00130190  | 0.996113 |
| rad67                         | 0.00110883  | 0.996963 | 0.00110915  | 0.997223 |
| PhCCH+CH3                     | 0.000809514 | 0.997773 | 0.000809751 | 0.998032 |
| PhcycC3H3_A+H                 | 0.000673391 | 0.998446 | 0.000673584 | 0.998706 |
| PhcycC3H3_B+H                 | 0.000561394 | 0.999007 | 0.000561554 | 0.999267 |
| rad35                         | 0.000398725 | 0.999406 | 0.000398838 | 0.999666 |
| Phenyl+cycC3H4                | 0.000260506 | 0.999667 | 0.000000    | 0.999666 |
| PAH10+CH3                     | 8.38007e-05 | 0.999750 | 8.38250e-05 | 0.999750 |
| PAH7+H                        | 7.89117e-05 | 0.999829 | 7.89341e-05 | 0.999829 |
| rad37                         | 7.83568e-05 | 0.999908 | 7.83785e-05 | 0.999907 |
| PAH9+H                        | 2.08511e-05 | 0.999929 | 2.08571e-05 | 0.999928 |
| rad38                         | 1.88167e-05 | 0.999947 | 1.88221e-05 | 0.999947 |
| rad30                         | 1.49360e-05 | 0.999962 | 1.49402e-05 | 0.999962 |
| rad39                         | 1.33374e-05 | 0.999976 | 1.33412e-05 | 0.999975 |
| PAH3+H                        | 1.25732e-05 | 0.999988 | 1.25768e-05 | 0.999988 |
| rad46                         | 2.73965e-06 | 0.999991 | 2.74043e-06 | 0.999991 |
| rad50                         | 1.75696e-06 | 0.999993 | 1.75746e-06 | 0.999992 |
| rad59                         | 1.29584e-06 | 0.999994 | 1.29620e-06 | 0.999994 |
| rad60syn                      | 1.24692e-06 | 0.999995 | 1.24728e-06 | 0.999995 |
| rad54                         | 1.23055e-06 | 0.999996 | 1.23091e-06 | 0.999996 |
| PAH1+H                        | 1.18164e-06 | 0.999998 | 1.18197e-06 | 0.999997 |
| rad60anti                     | 7.66599e-07 | 0.999998 | 7.66824e-07 | 0.999998 |
| rad43                         | 4.10006e-07 | 0.999999 | 4.10123e-07 | 0.999999 |
| rad51                         | 3.87406e-07 | 0.999999 | 3.87517e-07 | 0.999999 |
| rad70                         | 3.43677e-07 | 1.000000 | 3.43775e-07 | 0.999999 |
| rad52                         | 1.33628e-07 | 1.000000 | 1.33666e-07 | 0.999999 |
| rad58                         | 9.48433e-08 | 1.000000 | 9.48705e-08 | 1.000000 |
| rad55                         | 8.22139e-08 | 1.000000 | 8.22375e-08 | 1.000000 |
| rad34                         | 7.56235e-08 | 1.000000 | 7.56447e-08 | 1.000000 |
| rad61                         | 7.45086e-08 | 1.000000 | 7.45298e-08 | 1.000000 |
| rad62                         | 3.23565e-08 | 1.000000 | 3.23657e-08 | 1.000000 |
| rad41                         | 2.13212e-08 | 1.000000 | 2.13273e-08 | 1.000000 |
| rad53                         | 1.49188e-08 | 1.000000 | 1.49231e-08 | 1.000000 |
| rad56                         | 1.23746e-08 | 1.000000 | 1.23782e-08 | 1.000000 |
| rad65                         | 1.15036e-08 | 1.000000 | 1.15069e-08 | 1.000000 |
| PAH8+H                        | 1.11832e-08 | 1.000000 | 1.11864e-08 | 1.000000 |
| rad64                         | 5.02551e-09 | 1.000000 | 5.02694e-09 | 1.000000 |
| rad71                         | 4.76253e-09 | 1.000000 | 4.76388e-09 | 1.000000 |
| rad73                         | 4.36513e-09 | 1.000000 | 4.36638e-09 | 1.000000 |
| rad68syn                      | 3.35945e-09 | 1.000000 | 3.36041e-09 | 1.000000 |
| rad68anti                     | 2.20311e-09 | 1.000000 | 2.20373e-09 | 1.000000 |
| rad40syn                      | 2.06131e-09 | 1.000000 | 2.06190e-09 | 1.000000 |
| rad42                         | 1.87919e-09 | 1.000000 | 1.87972e-09 | 1.000000 |

|           |             |         |             |          |
|-----------|-------------|---------|-------------|----------|
| rad40anti | 1.60444e-09 | 1.00000 | 1.60490e-09 | 1.000000 |
| rad72     | 9.34613e-11 | 1.00000 | 9.34878e-11 | 1.000000 |
| rad9      | 1.93961e-13 | 1.00000 | 1.94017e-13 | 1.000000 |
| rad12     | 5.89852e-16 | 1.00000 | 5.90020e-16 | 1.000000 |
| rad15     | 9.47479e-17 | 1.00000 | 9.47751e-17 | 1.000000 |
| rad23     | 3.13771e-17 | 1.00000 | 3.13861e-17 | 1.000000 |
| rad45     | 2.02838e-17 | 1.00000 | 2.02896e-17 | 1.000000 |
| rad19anti | 1.48394e-17 | 1.00000 | 1.48436e-17 | 1.000000 |
| rad2      | 9.09929e-18 | 1.00000 | 9.10189e-18 | 1.000000 |
| rad11     | 5.69964e-18 | 1.00000 | 5.70127e-18 | 1.000000 |
| rad8      | 4.42248e-18 | 1.00000 | 4.42375e-18 | 1.000000 |
| rad21     | 3.03536e-18 | 1.00000 | 3.03622e-18 | 1.000000 |
| rad1      | 2.68364e-18 | 1.00000 | 2.68440e-18 | 1.000000 |
| rad6      | 2.33226e-18 | 1.00000 | 2.33293e-18 | 1.000000 |
| rad13     | 2.24558e-18 | 1.00000 | 2.24623e-18 | 1.000000 |
| rad36     | 2.11050e-18 | 1.00000 | 2.11111e-18 | 1.000000 |
| rad19syn  | 1.00706e-18 | 1.00000 | 1.00735e-18 | 1.000000 |
| rad7      | 8.18872e-19 | 1.00000 | 8.19109e-19 | 1.000000 |
| rad20     | 7.38165e-19 | 1.00000 | 7.38377e-19 | 1.000000 |
| rad10     | 7.05015e-19 | 1.00000 | 7.05217e-19 | 1.000000 |
| rad33     | 1.76734e-19 | 1.00000 | 1.76784e-19 | 1.000000 |
| rad18     | 1.53527e-19 | 1.00000 | 1.53571e-19 | 1.000000 |
| rad24     | 1.53474e-19 | 1.00000 | 1.53518e-19 | 1.000000 |
| rad3      | 7.53923e-20 | 1.00000 | 7.54135e-20 | 1.000000 |
| rad4      | 6.14012e-20 | 1.00000 | 6.14188e-20 | 1.000000 |
| rad25     | 5.66799e-20 | 1.00000 | 5.66960e-20 | 1.000000 |
| rad27     | 2.70870e-20 | 1.00000 | 2.70948e-20 | 1.000000 |
| rad31     | 2.62744e-21 | 1.00000 | 2.62819e-21 | 1.000000 |
| rad14     | 2.40834e-21 | 1.00000 | 2.40903e-21 | 1.000000 |
| rad26     | 1.22095e-21 | 1.00000 | 1.22130e-21 | 1.000000 |
| rad47     | 3.40948e-22 | 1.00000 | 3.41046e-22 | 1.000000 |
| rad28     | 2.49001e-23 | 1.00000 | 2.49071e-23 | 1.000000 |
| rad22     | 4.91251e-24 | 1.00000 | 4.91391e-24 | 1.000000 |
| rad5      | 2.37772e-25 | 1.00000 | 2.37840e-25 | 1.000000 |

0.100000000E-06 Pa, 1400.00000 K

| Rate constant             | True (fraction)       | Effective (fraction)  |
|---------------------------|-----------------------|-----------------------|
| Total                     | 6.19360e-12 (1.00 )   | 6.18997e-12 (1.00 )   |
| Formation of rad19        | 4.34185e-12 (0.701 )  | 4.33861e-12 (0.701 )  |
| H-abstraction to cyc2enyl | 1.32990e-12 (0.215 )  | 1.32990e-12 (0.215 )  |
| H-abstraction to cyc1enyl | 5.21850e-13 (0.0843 ) | 5.21461e-13 (0.0842 ) |

| species                       | PYtrue      | Cumul    | PYeffective | Cumul    |
|-------------------------------|-------------|----------|-------------|----------|
| Indene+H                      | 0.566028    | 0.566028 | 0.566360    | 0.566360 |
| Benzene+cycloprop-2-enylidene | 0.214721    | 0.780749 | 0.214847    | 0.781207 |
| PhCHCCH2+H                    | 0.113526    | 0.894275 | 0.113593    | 0.894800 |
| Benzene+cycloprop-1-enylidene | 0.0842564   | 0.978532 | 0.0842429   | 0.979043 |
| Ph+MeAc                       | 0.00387284  | 0.982405 | 0.00387511  | 0.982918 |
| Ph+Allene                     | 0.00376036  | 0.986165 | 0.00376256  | 0.986680 |
| C2H2+PhCH2                    | 0.00367929  | 0.989844 | 0.00368145  | 0.990362 |
| PhCH2CCH+H                    | 0.00231297  | 0.992157 | 0.00231433  | 0.992676 |
| PhCCCH3+H                     | 0.00159640  | 0.993754 | 0.00159734  | 0.994274 |
| rad67                         | 0.00144409  | 0.995198 | 0.00144494  | 0.995719 |
| PhcycC3H3_A+H                 | 0.00120489  | 0.996403 | 0.00120559  | 0.996924 |
| PhcycC3H3_B+H                 | 0.00109183  | 0.997495 | 0.00109247  | 0.998017 |
| PhCCH+CH3                     | 0.000988680 | 0.998483 | 0.000989264 | 0.999006 |
| Phenyl+cycC3H4                | 0.000523345 | 0.999007 | 0.000000    | 0.999006 |
| rad35                         | 0.000519418 | 0.999526 | 0.000519722 | 0.999526 |
| PAH10+CH3                     | 0.000132940 | 0.999659 | 0.000133019 | 0.999659 |
| rad37                         | 0.000103969 | 0.999763 | 0.000104030 | 0.999763 |
| PAH7+H                        | 9.76629e-05 | 0.999861 | 9.77202e-05 | 0.999860 |
| PAH9+H                        | 3.30451e-05 | 0.999894 | 3.30646e-05 | 0.999893 |
| rad38                         | 2.89869e-05 | 0.999923 | 2.90039e-05 | 0.999922 |
| PAH3+H                        | 2.09773e-05 | 0.999944 | 2.09896e-05 | 0.999943 |
| rad30                         | 2.03484e-05 | 0.999964 | 2.03603e-05 | 0.999964 |
| rad39                         | 1.60326e-05 | 0.999980 | 1.60420e-05 | 0.999980 |
| rad46                         | 4.60489e-06 | 0.999985 | 4.60759e-06 | 0.999984 |
| rad50                         | 3.39256e-06 | 0.999988 | 3.39455e-06 | 0.999988 |
| rad59                         | 2.10237e-06 | 0.999990 | 2.10360e-06 | 0.999990 |
| PAH1+H                        | 2.05214e-06 | 0.999992 | 2.05334e-06 | 0.999992 |
| rad60syn                      | 1.88965e-06 | 0.999994 | 1.89076e-06 | 0.999994 |
| rad54                         | 1.78086e-06 | 0.999996 | 1.78190e-06 | 0.999996 |
| rad60anti                     | 1.16973e-06 | 0.999997 | 1.17042e-06 | 0.999997 |
| rad51                         | 8.27129e-07 | 0.999998 | 8.27613e-07 | 0.999998 |
| rad43                         | 6.31782e-07 | 0.999998 | 6.32153e-07 | 0.999998 |
| rad70                         | 5.60217e-07 | 0.999999 | 5.60546e-07 | 0.999999 |
| rad52                         | 2.70713e-07 | 0.999999 | 2.70872e-07 | 0.999999 |

|           |             |          |             |          |
|-----------|-------------|----------|-------------|----------|
| rad58     | 1.78428e-07 | 0.999999 | 1.78532e-07 | 0.999999 |
| rad61     | 1.46277e-07 | 1.000000 | 1.46363e-07 | 0.999999 |
| rad34     | 1.30056e-07 | 1.000000 | 1.30132e-07 | 1.000000 |
| rad55     | 1.23571e-07 | 1.000000 | 1.23644e-07 | 1.000000 |
| rad62     | 4.61529e-08 | 1.000000 | 4.61799e-08 | 1.000000 |
| rad41     | 3.74002e-08 | 1.000000 | 3.74221e-08 | 1.000000 |
| PAH8+H    | 2.63148e-08 | 1.000000 | 2.63303e-08 | 1.000000 |
| rad53     | 2.60384e-08 | 1.000000 | 2.60537e-08 | 1.000000 |
| rad65     | 2.42340e-08 | 1.000000 | 2.42482e-08 | 1.000000 |
| rad56     | 2.33522e-08 | 1.000000 | 2.33659e-08 | 1.000000 |
| rad71     | 1.41523e-08 | 1.000000 | 1.41606e-08 | 1.000000 |
| rad73     | 1.20322e-08 | 1.000000 | 1.20393e-08 | 1.000000 |
| rad64     | 8.79755e-09 | 1.000000 | 8.80273e-09 | 1.000000 |
| rad68syn  | 6.90097e-09 | 1.000000 | 6.90502e-09 | 1.000000 |
| rad40syn  | 4.57744e-09 | 1.000000 | 4.58013e-09 | 1.000000 |
| rad68anti | 4.51464e-09 | 1.000000 | 4.51729e-09 | 1.000000 |
| rad40anti | 3.59045e-09 | 1.000000 | 3.59256e-09 | 1.000000 |
| rad42     | 3.00666e-09 | 1.000000 | 3.00843e-09 | 1.000000 |
| rad72     | 3.28506e-10 | 1.000000 | 3.28699e-10 | 1.000000 |
| rad9      | 1.23997e-13 | 1.000000 | 1.24069e-13 | 1.000000 |
| rad12     | 4.68956e-16 | 1.000000 | 4.69231e-16 | 1.000000 |
| rad15     | 3.62250e-16 | 1.000000 | 3.62462e-16 | 1.000000 |
| rad23     | 2.81891e-17 | 1.000000 | 2.82056e-17 | 1.000000 |
| rad45     | 1.87709e-17 | 1.000000 | 1.87819e-17 | 1.000000 |
| rad11     | 1.44856e-17 | 1.000000 | 1.44941e-17 | 1.000000 |
| rad19anti | 1.15118e-17 | 1.000000 | 1.15186e-17 | 1.000000 |
| rad2      | 6.73822e-18 | 1.000000 | 6.74217e-18 | 1.000000 |
| rad8      | 5.66687e-18 | 1.000000 | 5.67019e-18 | 1.000000 |
| rad6      | 3.91472e-18 | 1.000000 | 3.91702e-18 | 1.000000 |
| rad21     | 3.67060e-18 | 1.000000 | 3.67275e-18 | 1.000000 |
| rad7      | 3.48156e-18 | 1.000000 | 3.48360e-18 | 1.000000 |
| rad13     | 2.61024e-18 | 1.000000 | 2.61177e-18 | 1.000000 |
| rad10     | 2.47820e-18 | 1.000000 | 2.47965e-18 | 1.000000 |
| rad1      | 2.00645e-18 | 1.000000 | 2.00762e-18 | 1.000000 |
| rad36     | 1.96365e-18 | 1.000000 | 1.96480e-18 | 1.000000 |
| rad19syn  | 8.90593e-19 | 1.000000 | 8.91116e-19 | 1.000000 |
| rad20     | 8.28826e-19 | 1.000000 | 8.29310e-19 | 1.000000 |
| rad18     | 5.37818e-19 | 1.000000 | 5.38134e-19 | 1.000000 |
| rad24     | 1.80313e-19 | 1.000000 | 1.80420e-19 | 1.000000 |
| rad33     | 1.72625e-19 | 1.000000 | 1.72727e-19 | 1.000000 |
| rad25     | 7.72646e-20 | 1.000000 | 7.73097e-20 | 1.000000 |
| rad3      | 5.30122e-20 | 1.000000 | 5.30433e-20 | 1.000000 |
| rad4      | 4.29028e-20 | 1.000000 | 4.29280e-20 | 1.000000 |
| rad27     | 3.50744e-20 | 1.000000 | 3.50950e-20 | 1.000000 |
| rad26     | 2.23174e-20 | 1.000000 | 2.23305e-20 | 1.000000 |
| rad14     | 3.02573e-21 | 1.000000 | 3.02750e-21 | 1.000000 |
| rad31     | 2.62635e-21 | 1.000000 | 2.62789e-21 | 1.000000 |
| rad47     | 7.15113e-22 | 1.000000 | 7.15531e-22 | 1.000000 |
| rad28     | 3.11058e-22 | 1.000000 | 3.11240e-22 | 1.000000 |
| rad22     | 8.81269e-23 | 1.000000 | 8.81787e-23 | 1.000000 |
| rad5      | 1.06059e-23 | 1.000000 | 1.06121e-23 | 1.000000 |

0.100000000E-06 Pa, 1500.00000 K

=====

| Rate constant             | True (fraction)       | Effective (fraction)  |
|---------------------------|-----------------------|-----------------------|
| Total                     | 7.80417e-12 (1.00 )   | 7.79561e-12 (1.00 )   |
| Formation of rad19        | 5.22661e-12 (0.670 )  | 5.21915e-12 (0.669 )  |
| H-abstraction to cyc2enyl | 1.80920e-12 (0.232 )  | 1.80920e-12 (0.232 )  |
| H-abstraction to cyclenyl | 7.68359e-13 (0.0985 ) | 7.67262e-13 (0.0984 ) |

| species                       | PYtrue      | Cumul    | PYeffective | Cumul    |
|-------------------------------|-------------|----------|-------------|----------|
| Indene+H                      | 0.505870    | 0.505870 | 0.506425    | 0.506425 |
| Benzene+cycloprop-2-enylidene | 0.231825    | 0.737695 | 0.232079    | 0.738505 |
| PhCHCCH2+H                    | 0.135967    | 0.873662 | 0.136116    | 0.874621 |
| Benzene+cycloprop-1-enylidene | 0.0984549   | 0.972117 | 0.0984223   | 0.973043 |
| Ph+MeAc                       | 0.00470570  | 0.976823 | 0.00471086  | 0.977754 |
| Ph+Allene                     | 0.00464760  | 0.981470 | 0.00465271  | 0.982407 |
| C2H2+PhCH2                    | 0.00447301  | 0.985943 | 0.00447791  | 0.986885 |
| PhCH2CCH+H                    | 0.00304819  | 0.988991 | 0.00305154  | 0.989936 |
| PhcycC3H3_A+H                 | 0.00198976  | 0.990981 | 0.00199195  | 0.991928 |
| PhcycC3H3_B+H                 | 0.00193280  | 0.992914 | 0.00193492  | 0.993863 |
| PhCCCH3+H                     | 0.00187667  | 0.994791 | 0.00187873  | 0.995742 |
| rad67                         | 0.00179097  | 0.996582 | 0.00179294  | 0.997535 |
| PhCCH+CH3                     | 0.00117783  | 0.997759 | 0.00117912  | 0.998714 |
| Phenyl+cycC3H4                | 0.000956146 | 0.998716 | 0.000000    | 0.998714 |
| rad35                         | 0.000644848 | 0.999360 | 0.000645555 | 0.999360 |
| PAH10+CH3                     | 0.000194190 | 0.999555 | 0.000194404 | 0.999554 |
| rad37                         | 0.000129806 | 0.999684 | 0.000129949 | 0.999684 |





|                               |             |          |             |          |
|-------------------------------|-------------|----------|-------------|----------|
| Indene+H                      | 0.999772    | 0.999772 | 0.999772    | 0.999772 |
| PhCHCCH2+H                    | 0.000217190 | 0.999989 | 0.000217190 | 0.999989 |
| PhCCH+CH3                     | 3.74993e-06 | 0.999993 | 3.74993e-06 | 0.999993 |
| C2H2+PhCH2                    | 2.66078e-06 | 0.999996 | 2.66078e-06 | 0.999996 |
| PhCCCH3+H                     | 2.10744e-06 | 0.999998 | 2.10744e-06 | 0.999998 |
| Ph+MeAc                       | 1.55535e-06 | 0.999999 | 1.55535e-06 | 0.999999 |
| rad67                         | 4.72017e-07 | 1.000000 | 4.72017e-07 | 1.000000 |
| rad35                         | 2.09059e-07 | 1.000000 | 2.09059e-07 | 1.000000 |
| Ph+Allene                     | 1.34639e-07 | 1.000000 | 1.34639e-07 | 1.000000 |
| PAH7+H                        | 1.78373e-08 | 1.000000 | 1.78373e-08 | 1.000000 |
| PhCH2CCH+H                    | 1.63595e-08 | 1.000000 | 1.63595e-08 | 1.000000 |
| rad39                         | 5.03017e-09 | 1.000000 | 5.03017e-09 | 1.000000 |
| rad37                         | 4.62673e-09 | 1.000000 | 4.62673e-09 | 1.000000 |
| rad30                         | 3.90781e-09 | 1.000000 | 3.90781e-09 | 1.000000 |
| PAH9+H                        | 2.53961e-10 | 1.000000 | 2.53961e-10 | 1.000000 |
| rad38                         | 1.06938e-10 | 1.000000 | 1.06938e-10 | 1.000000 |
| rad60syn                      | 1.69319e-11 | 1.000000 | 1.69319e-11 | 1.000000 |
| rad60anti                     | 8.26560e-12 | 1.000000 | 8.26560e-12 | 1.000000 |
| PAH3+H                        | 6.72155e-12 | 1.000000 | 6.72155e-12 | 1.000000 |
| rad46                         | 6.42601e-12 | 1.000000 | 6.42601e-12 | 1.000000 |
| PAH10+CH3                     | 5.52880e-12 | 1.000000 | 5.52880e-12 | 1.000000 |
| rad59                         | 1.39467e-12 | 1.000000 | 1.39467e-12 | 1.000000 |
| PhcycC3H3_A+H                 | 4.13677e-13 | 1.000000 | 4.13677e-13 | 1.000000 |
| rad43                         | 2.58810e-13 | 1.000000 | 2.58810e-13 | 1.000000 |
| rad54                         | 2.05786e-13 | 1.000000 | 2.05786e-13 | 1.000000 |
| rad62                         | 5.54306e-14 | 1.000000 | 5.54306e-14 | 1.000000 |
| rad50                         | 4.23315e-14 | 1.000000 | 4.23315e-14 | 1.000000 |
| rad70                         | 3.14362e-15 | 1.000000 | 3.14362e-15 | 1.000000 |
| rad55                         | 1.37813e-15 | 1.000000 | 1.37813e-15 | 1.000000 |
| PAH1+H                        | 5.58594e-16 | 1.000000 | 5.58594e-16 | 1.000000 |
| rad52                         | 2.67814e-16 | 1.000000 | 2.67814e-16 | 1.000000 |
| rad58                         | 7.50234e-17 | 1.000000 | 7.50234e-17 | 1.000000 |
| rad51                         | 6.49691e-17 | 1.000000 | 6.49691e-17 | 1.000000 |
| rad34                         | 2.91050e-17 | 1.000000 | 2.91050e-17 | 1.000000 |
| Phenyl+cycC3H4                | 2.77347e-17 | 1.000000 | 0.000000    | 1.000000 |
| rad42                         | 3.04830e-18 | 1.000000 | 3.04830e-18 | 1.000000 |
| rad41                         | 2.76406e-18 | 1.000000 | 2.76406e-18 | 1.000000 |
| rad65                         | 1.27714e-18 | 1.000000 | 1.27714e-18 | 1.000000 |
| PhcycC3H3_B+H                 | 2.48349e-31 | 1.000000 | 2.48349e-31 | 1.000000 |
| rad53                         | 1.11865e-32 | 1.000000 | 1.11865e-32 | 1.000000 |
| rad6                          | 1.08467e-32 | 1.000000 | 1.08467e-32 | 1.000000 |
| rad26                         | 8.42249e-33 | 1.000000 | 8.42249e-33 | 1.000000 |
| rad47                         | 5.36316e-33 | 1.000000 | 5.36316e-33 | 1.000000 |
| rad28                         | 2.85953e-33 | 1.000000 | 2.85953e-33 | 1.000000 |
| rad64                         | 4.89180e-35 | 1.000000 | 4.89180e-35 | 1.000000 |
| rad2                          | 1.53972e-35 | 1.000000 | 1.53972e-35 | 1.000000 |
| rad14                         | 2.26788e-36 | 1.000000 | 2.26788e-36 | 1.000000 |
| rad25                         | 1.04423e-36 | 1.000000 | 1.04423e-36 | 1.000000 |
| rad1                          | 9.72593e-37 | 1.000000 | 9.72593e-37 | 1.000000 |
| rad10                         | 8.05889e-37 | 1.000000 | 8.05889e-37 | 1.000000 |
| rad7                          | 7.82536e-37 | 1.000000 | 7.82536e-37 | 1.000000 |
| rad27                         | 2.12313e-37 | 1.000000 | 2.12313e-37 | 1.000000 |
| rad11                         | 1.94623e-37 | 1.000000 | 1.94623e-37 | 1.000000 |
| rad19anti                     | 1.76071e-37 | 1.000000 | 1.76071e-37 | 1.000000 |
| rad3                          | 1.60068e-37 | 1.000000 | 1.60068e-37 | 1.000000 |
| rad4                          | 8.08463e-38 | 1.000000 | 8.08463e-38 | 1.000000 |
| rad13                         | 4.32209e-39 | 1.000000 | 4.32209e-39 | 1.000000 |
| rad9                          | 2.40698e-39 | 1.000000 | 2.40698e-39 | 1.000000 |
| rad5                          | 7.09922e-40 | 1.000000 | 7.09922e-40 | 1.000000 |
| rad33                         | 1.62497e-41 | 1.000000 | 1.62497e-41 | 1.000000 |
| rad31                         | 1.07180e-41 | 1.000000 | 1.07180e-41 | 1.000000 |
| rad61                         | 5.02958e-42 | 1.000000 | 5.02958e-42 | 1.000000 |
| rad15                         | 1.05240e-42 | 1.000000 | 1.05240e-42 | 1.000000 |
| rad20                         | 5.65075e-44 | 1.000000 | 5.65075e-44 | 1.000000 |
| rad21                         | 4.47127e-44 | 1.000000 | 4.47127e-44 | 1.000000 |
| rad56                         | 3.36943e-44 | 1.000000 | 3.36943e-44 | 1.000000 |
| rad18                         | 7.20083e-46 | 1.000000 | 7.20083e-46 | 1.000000 |
| rad12                         | 3.97080e-46 | 1.000000 | 3.97080e-46 | 1.000000 |
| Benzene+cycloprop-2-enylidene | 3.08591e-46 | 1.000000 | 3.08591e-46 | 1.000000 |
| rad68syn                      | 2.54023e-46 | 1.000000 | 2.54023e-46 | 1.000000 |
| rad68anti                     | 2.17398e-46 | 1.000000 | 2.17398e-46 | 1.000000 |
| rad19syn                      | 1.37416e-47 | 1.000000 | 1.37416e-47 | 1.000000 |
| rad23                         | 5.31319e-48 | 1.000000 | 5.31319e-48 | 1.000000 |
| rad22                         | 3.72947e-48 | 1.000000 | 3.72947e-48 | 1.000000 |
| rad24                         | 7.35788e-50 | 1.000000 | 7.35788e-50 | 1.000000 |
| rad45                         | 3.76091e-50 | 1.000000 | 3.76091e-50 | 1.000000 |
| rad36                         | 2.30670e-51 | 1.000000 | 2.30670e-51 | 1.000000 |
| rad73                         | 2.07001e-54 | 1.000000 | 2.07001e-54 | 1.000000 |
| rad40syn                      | 2.93458e-55 | 1.000000 | 2.93458e-55 | 1.000000 |
| rad40anti                     | 2.41836e-55 | 1.000000 | 2.41836e-55 | 1.000000 |

|                               |             |         |             |         |
|-------------------------------|-------------|---------|-------------|---------|
| PAH8+H                        | 1.12087e-59 | 1.00000 | 1.12087e-59 | 1.00000 |
| rad71                         | 3.49397e-63 | 1.00000 | 3.49397e-63 | 1.00000 |
| rad8                          | 2.40363e-67 | 1.00000 | 2.40363e-67 | 1.00000 |
| Benzene+cycloprop-1-enylidene | 5.02895e-84 | 1.00000 | 5.02895e-84 | 1.00000 |

0.100000000E-07 Pa, 30.0000000 K

```

=====
Rate constant      | True (fraction)      Effective (fraction)
-----
Total              | 8.13009e-20 (1.00   ) 8.13009e-20 (1.00   )
Formation of rad19 | 8.13009e-20 (1.00   ) 8.13009e-20 (1.00   )
H-abstraction to cyc2enyl | 1.08880e-49 (1.34e-30) 1.08880e-49 (1.34e-30)
H-abstraction to cyclenyl | 7.55172e-75 (9.29e-56) 7.55172e-75 (9.29e-56)
=====
species            | PYtrue      Cumul      | PYeffective  Cumul
-----
Indene+H           | 0.999770    0.999770    | 0.999770    0.999770
PhCHCCH2+H        | 0.000218740 0.999989    | 0.000218740 0.999989
PhCCH+CH3         | 3.77922e-06 0.999993    | 3.77922e-06 0.999993
C2H2+PhCH2       | 2.68544e-06 0.999995    | 2.68544e-06 0.999995
PhCCCH3+H        | 2.12543e-06 0.999997    | 2.12543e-06 0.999997
Ph+MeAc          | 1.57151e-06 0.999999    | 1.57151e-06 0.999999
rad67             | 4.76660e-07 0.999999    | 4.76660e-07 0.999999
rad35             | 2.11031e-07 1.000000    | 2.11031e-07 1.000000
Ph+Allene         | 1.36499e-07 1.000000    | 1.36499e-07 1.000000
PAH7+H           | 1.80489e-08 1.000000    | 1.80489e-08 1.000000
PhCH2CCH+H       | 1.66215e-08 1.000000    | 1.66215e-08 1.000000
rad39            | 5.09007e-09 1.000000    | 5.09007e-09 1.000000
rad37            | 4.68501e-09 1.000000    | 4.68501e-09 1.000000
rad30            | 3.94539e-09 1.000000    | 3.94539e-09 1.000000
PAH9+H           | 2.57108e-10 1.000000    | 2.57108e-10 1.000000
rad38            | 1.08385e-10 1.000000    | 1.08385e-10 1.000000
rad60syn         | 1.71588e-11 1.000000    | 1.71588e-11 1.000000
rad60anti        | 8.37914e-12 1.000000    | 8.37914e-12 1.000000
PAH3+H           | 6.84326e-12 1.000000    | 6.84326e-12 1.000000
rad46            | 6.51963e-12 1.000000    | 6.51963e-12 1.000000
PAH10+CH3        | 5.67120e-12 1.000000    | 5.67120e-12 1.000000
rad59            | 1.41896e-12 1.000000    | 1.41896e-12 1.000000
PhcycC3H3_A+H    | 4.42422e-13 1.000000    | 4.42422e-13 1.000000
rad43            | 2.64743e-13 1.000000    | 2.64743e-13 1.000000
rad54            | 2.11004e-13 1.000000    | 2.11004e-13 1.000000
rad62            | 5.67504e-14 1.000000    | 5.67504e-14 1.000000
rad50            | 4.32261e-14 1.000000    | 4.32261e-14 1.000000
rad70            | 3.24823e-15 1.000000    | 3.24823e-15 1.000000
rad55            | 1.42504e-15 1.000000    | 1.42504e-15 1.000000
PAH1+H           | 5.84855e-16 1.000000    | 5.84855e-16 1.000000
rad52            | 2.74820e-16 1.000000    | 2.74820e-16 1.000000
rad58            | 7.77933e-17 1.000000    | 7.77933e-17 1.000000
rad51            | 6.70684e-17 1.000000    | 6.70684e-17 1.000000
Phenyl+cycC3H4  | 5.25631e-17 1.000000    | 0.00000     1.000000
rad34            | 3.05744e-17 1.000000    | 3.05744e-17 1.000000
rad42            | 3.20852e-18 1.000000    | 3.20852e-18 1.000000
rad41            | 2.96189e-18 1.000000    | 2.96189e-18 1.000000
rad65            | 1.32250e-18 1.000000    | 1.32250e-18 1.000000
PhcycC3H3_B+H    | 4.17906e-19 1.000000    | 4.17906e-19 1.000000
Benzene+cycloprop-2-enylidene | 1.33923e-30 1.000000    | 1.33923e-30 1.000000
rad53            | 9.57173e-33 1.000000    | 9.57173e-33 1.000000
rad26            | 3.92746e-33 1.000000    | 3.92746e-33 1.000000
rad47            | 2.66202e-33 1.000000    | 2.66202e-33 1.000000
rad6             | 2.44799e-33 1.000000    | 2.44799e-33 1.000000
rad28            | 1.18486e-33 1.000000    | 1.18486e-33 1.000000
rad64            | 3.66428e-35 1.000000    | 3.66428e-35 1.000000
rad2             | 5.84034e-36 1.000000    | 5.84034e-36 1.000000
rad14            | 1.11600e-36 1.000000    | 1.11600e-36 1.000000
rad25            | 5.15837e-37 1.000000    | 5.15837e-37 1.000000
rad1             | 3.69111e-37 1.000000    | 3.69111e-37 1.000000
rad10            | 3.24648e-37 1.000000    | 3.24648e-37 1.000000
rad7             | 1.76677e-37 1.000000    | 1.76677e-37 1.000000
rad27            | 1.04941e-37 1.000000    | 1.04941e-37 1.000000
rad19anti        | 9.43582e-38 1.000000    | 9.43582e-38 1.000000
rad3             | 6.66431e-38 1.000000    | 6.66431e-38 1.000000
rad11            | 4.47845e-38 1.000000    | 4.47845e-38 1.000000
rad4             | 3.36633e-38 1.000000    | 3.36633e-38 1.000000
rad13            | 9.76078e-40 1.000000    | 9.76078e-40 1.000000
rad9             | 9.02921e-40 1.000000    | 9.02921e-40 1.000000
rad5             | 2.93670e-40 1.000000    | 2.93670e-40 1.000000
rad33            | 5.90910e-42 1.000000    | 5.90910e-42 1.000000
rad31            | 5.64755e-42 1.000000    | 5.64755e-42 1.000000
rad61            | 3.99438e-42 1.000000    | 3.99438e-42 1.000000
rad15            | 3.96314e-43 1.000000    | 3.96314e-43 1.000000

```

|                               |             |          |             |          |
|-------------------------------|-------------|----------|-------------|----------|
| rad20                         | 2.85019e-44 | 1.000000 | 2.85019e-44 | 1.000000 |
| rad56                         | 2.62090e-44 | 1.000000 | 2.62090e-44 | 1.000000 |
| rad21                         | 2.25784e-44 | 1.000000 | 2.25784e-44 | 1.000000 |
| rad18                         | 3.58954e-46 | 1.000000 | 3.58954e-46 | 1.000000 |
| rad12                         | 2.04615e-46 | 1.000000 | 2.04615e-46 | 1.000000 |
| rad68syn                      | 1.99221e-46 | 1.000000 | 1.99221e-46 | 1.000000 |
| rad68anti                     | 1.70453e-46 | 1.000000 | 1.70453e-46 | 1.000000 |
| rad19syn                      | 8.38610e-48 | 1.000000 | 8.38610e-48 | 1.000000 |
| rad23                         | 1.82949e-48 | 1.000000 | 1.82949e-48 | 1.000000 |
| rad22                         | 1.82806e-48 | 1.000000 | 1.82806e-48 | 1.000000 |
| rad24                         | 3.78959e-50 | 1.000000 | 3.78959e-50 | 1.000000 |
| rad45                         | 1.34393e-50 | 1.000000 | 1.34393e-50 | 1.000000 |
| rad36                         | 8.24135e-52 | 1.000000 | 8.24135e-52 | 1.000000 |
| rad73                         | 1.66954e-54 | 1.000000 | 1.66954e-54 | 1.000000 |
| rad40syn                      | 2.57248e-55 | 1.000000 | 2.57248e-55 | 1.000000 |
| rad40anti                     | 2.11969e-55 | 1.000000 | 2.11969e-55 | 1.000000 |
| Benzene+cycloprop-1-enylidene | 9.28861e-56 | 1.000000 | 9.28861e-56 | 1.000000 |
| PAH8+H                        | 1.00608e-59 | 1.000000 | 1.00608e-59 | 1.000000 |
| rad71                         | 2.96430e-63 | 1.000000 | 2.96430e-63 | 1.000000 |
| rad8                          | 1.26714e-67 | 1.000000 | 1.26714e-67 | 1.000000 |

0.100000000E-07 Pa, 40.000000 K

| Rate constant             | True (fraction)        | Effective (fraction)   |
|---------------------------|------------------------|------------------------|
| Total                     | 2.24819e-18 (1.00 )    | 2.24819e-18 (1.00 )    |
| Formation of rad19        | 2.24819e-18 (1.00 )    | 2.24819e-18 (1.00 )    |
| H-abstraction to cyc2enyl | 1.72361e-40 (7.67e-23) | 1.72361e-40 (7.67e-23) |
| H-abstraction to cyclenyl | 2.48792e-59 (1.11e-41) | 2.48792e-59 (1.11e-41) |

| species                       | PYtrue      | Cumul    | PYeffective | Cumul    |
|-------------------------------|-------------|----------|-------------|----------|
| Indene+H                      | 0.999767    | 0.999767 | 0.999767    | 0.999767 |
| PhCHCCH2+H                    | 0.000221748 | 0.999989 | 0.000221748 | 0.999989 |
| PhCCH+CH3                     | 3.83605e-06 | 0.999993 | 3.83605e-06 | 0.999993 |
| C2H2+PhCH2                    | 2.73340e-06 | 0.999995 | 2.73340e-06 | 0.999995 |
| PhCCCH3+H                     | 2.16038e-06 | 0.999997 | 2.16038e-06 | 0.999997 |
| Ph+MeAc                       | 1.60299e-06 | 0.999999 | 1.60299e-06 | 0.999999 |
| rad67                         | 4.85698e-07 | 1.000000 | 4.85698e-07 | 1.000000 |
| rad35                         | 2.14867e-07 | 1.000000 | 2.14867e-07 | 1.000000 |
| Ph+Allene                     | 1.40139e-07 | 1.000000 | 1.40139e-07 | 1.000000 |
| PAH7+H                        | 1.84621e-08 | 1.000000 | 1.84621e-08 | 1.000000 |
| PhCH2CCH+H                    | 1.71356e-08 | 1.000000 | 1.71356e-08 | 1.000000 |
| rad39                         | 5.20698e-09 | 1.000000 | 5.20698e-09 | 1.000000 |
| rad37                         | 4.79888e-09 | 1.000000 | 4.79888e-09 | 1.000000 |
| rad30                         | 4.01853e-09 | 1.000000 | 4.01853e-09 | 1.000000 |
| PAH9+H                        | 2.63258e-10 | 1.000000 | 2.63258e-10 | 1.000000 |
| rad38                         | 1.11216e-10 | 1.000000 | 1.11216e-10 | 1.000000 |
| rad60syn                      | 1.76027e-11 | 1.000000 | 1.76027e-11 | 1.000000 |
| rad60anti                     | 8.60137e-12 | 1.000000 | 8.60137e-12 | 1.000000 |
| PAH3+H                        | 7.08284e-12 | 1.000000 | 7.08284e-12 | 1.000000 |
| rad46                         | 6.70313e-12 | 1.000000 | 6.70313e-12 | 1.000000 |
| PAH10+CH3                     | 5.95405e-12 | 1.000000 | 5.95405e-12 | 1.000000 |
| rad59                         | 1.46672e-12 | 1.000000 | 1.46672e-12 | 1.000000 |
| PhcycC3H3_A+H                 | 5.01394e-13 | 1.000000 | 5.01394e-13 | 1.000000 |
| rad43                         | 2.76481e-13 | 1.000000 | 2.76481e-13 | 1.000000 |
| rad54                         | 2.21365e-13 | 1.000000 | 2.21365e-13 | 1.000000 |
| rad62                         | 5.93637e-14 | 1.000000 | 5.93637e-14 | 1.000000 |
| rad50                         | 4.49944e-14 | 1.000000 | 4.49944e-14 | 1.000000 |
| rad70                         | 3.45813e-15 | 1.000000 | 3.45813e-15 | 1.000000 |
| rad55                         | 1.51897e-15 | 1.000000 | 1.51897e-15 | 1.000000 |
| PAH1+H                        | 6.38443e-16 | 1.000000 | 6.38443e-16 | 1.000000 |
| rad52                         | 2.88755e-16 | 1.000000 | 2.88755e-16 | 1.000000 |
| Phenyl+cycC3H4                | 1.15738e-16 | 1.000000 | 0.000000    | 1.000000 |
| rad58                         | 8.33664e-17 | 1.000000 | 8.33664e-17 | 1.000000 |
| rad51                         | 7.12775e-17 | 1.000000 | 7.12775e-17 | 1.000000 |
| rad34                         | 3.35233e-17 | 1.000000 | 3.35233e-17 | 1.000000 |
| rad42                         | 3.55448e-18 | 1.000000 | 3.55448e-18 | 1.000000 |
| rad41                         | 3.38724e-18 | 1.000000 | 3.38724e-18 | 1.000000 |
| rad65                         | 1.41378e-18 | 1.000000 | 1.41378e-18 | 1.000000 |
| Benzene+cycloprop-2-enylidene | 7.66665e-23 | 1.000000 | 7.66665e-23 | 1.000000 |
| PhcycC3H3_B+H                 | 8.31291e-25 | 1.000000 | 8.31291e-25 | 1.000000 |
| rad53                         | 2.40803e-29 | 1.000000 | 2.40803e-29 | 1.000000 |
| rad64                         | 2.76937e-33 | 1.000000 | 2.76937e-33 | 1.000000 |
| rad26                         | 2.52652e-33 | 1.000000 | 2.52652e-33 | 1.000000 |
| rad47                         | 1.79767e-33 | 1.000000 | 1.79767e-33 | 1.000000 |
| rad6                          | 1.08285e-33 | 1.000000 | 1.08285e-33 | 1.000000 |
| rad28                         | 7.25670e-34 | 1.000000 | 7.25670e-34 | 1.000000 |
| rad2                          | 3.98506e-36 | 1.000000 | 3.98506e-36 | 1.000000 |
| rad14                         | 7.43207e-37 | 1.000000 | 7.43207e-37 | 1.000000 |

|                               |             |          |             |          |
|-------------------------------|-------------|----------|-------------|----------|
| rad25                         | 3.46204e-37 | 1.000000 | 3.46204e-37 | 1.000000 |
| rad1                          | 2.52139e-37 | 1.000000 | 2.52139e-37 | 1.000000 |
| rad10                         | 2.16370e-37 | 1.000000 | 2.16370e-37 | 1.000000 |
| rad7                          | 7.82078e-38 | 1.000000 | 7.82078e-38 | 1.000000 |
| rad19anti                     | 7.57595e-38 | 1.000000 | 7.57595e-38 | 1.000000 |
| rad27                         | 7.05390e-38 | 1.000000 | 7.05390e-38 | 1.000000 |
| rad3                          | 4.93081e-38 | 1.000000 | 4.93081e-38 | 1.000000 |
| rad4                          | 2.49126e-38 | 1.000000 | 2.49126e-38 | 1.000000 |
| rad11                         | 2.01858e-38 | 1.000000 | 2.01858e-38 | 1.000000 |
| rad9                          | 5.77539e-40 | 1.000000 | 5.77539e-40 | 1.000000 |
| rad13                         | 4.32265e-40 | 1.000000 | 4.32265e-40 | 1.000000 |
| rad5                          | 1.79484e-40 | 1.000000 | 1.79484e-40 | 1.000000 |
| Benzene+cycloprop-1-enylidene | 1.10663e-41 | 1.000000 | 1.10663e-41 | 1.000000 |
| rad61                         | 6.80052e-42 | 1.000000 | 6.80052e-42 | 1.000000 |
| rad31                         | 4.36406e-42 | 1.000000 | 4.36406e-42 | 1.000000 |
| rad33                         | 3.63468e-42 | 1.000000 | 3.63468e-42 | 1.000000 |
| rad15                         | 2.53869e-43 | 1.000000 | 2.53869e-43 | 1.000000 |
| rad56                         | 4.28736e-44 | 1.000000 | 4.28736e-44 | 1.000000 |
| rad20                         | 1.99984e-44 | 1.000000 | 1.99984e-44 | 1.000000 |
| rad21                         | 1.58797e-44 | 1.000000 | 1.58797e-44 | 1.000000 |
| rad68syn                      | 3.31655e-46 | 1.000000 | 3.31655e-46 | 1.000000 |
| rad68anti                     | 2.83606e-46 | 1.000000 | 2.83606e-46 | 1.000000 |
| rad18                         | 2.45624e-46 | 1.000000 | 2.45624e-46 | 1.000000 |
| rad12                         | 1.52362e-46 | 1.000000 | 1.52362e-46 | 1.000000 |
| rad19syn                      | 8.61360e-48 | 1.000000 | 8.61360e-48 | 1.000000 |
| rad22                         | 1.22869e-48 | 1.000000 | 1.22869e-48 | 1.000000 |
| rad23                         | 1.09554e-48 | 1.000000 | 1.09554e-48 | 1.000000 |
| rad24                         | 2.77723e-50 | 1.000000 | 2.77723e-50 | 1.000000 |
| rad45                         | 8.55213e-51 | 1.000000 | 8.55213e-51 | 1.000000 |
| rad36                         | 5.24261e-52 | 1.000000 | 5.24261e-52 | 1.000000 |
| rad73                         | 2.95408e-54 | 1.000000 | 2.95408e-54 | 1.000000 |
| rad40syn                      | 5.41703e-55 | 1.000000 | 5.41703e-55 | 1.000000 |
| rad40anti                     | 4.46179e-55 | 1.000000 | 4.46179e-55 | 1.000000 |
| PAH8+H                        | 2.23567e-59 | 1.000000 | 2.23567e-59 | 1.000000 |
| rad71                         | 5.87042e-63 | 1.000000 | 5.87042e-63 | 1.000000 |
| rad8                          | 9.75566e-68 | 1.000000 | 9.75566e-68 | 1.000000 |

0.100000000E-07 Pa, 50.000000 K

| Rate constant             | True (fraction)        | Effective (fraction)   |
|---------------------------|------------------------|------------------------|
| Total                     | 1.72707e-17 (1.00)     | 1.72707e-17 (1.00)     |
| Formation of rad19        | 1.72707e-17 (1.00)     | 1.72707e-17 (1.00)     |
| H-abstraction to cyc2enyl | 5.49905e-35 (3.18e-18) | 5.49905e-35 (3.18e-18) |
| H-abstraction to cyclenyl | 4.93090e-50 (2.86e-33) | 4.93090e-50 (2.86e-33) |

| species        | PYtrue      | Cumul    | PYeffective | Cumul    |
|----------------|-------------|----------|-------------|----------|
| Indene+H       | 0.999763    | 0.999763 | 0.999763    | 0.999763 |
| PhCHCCH2+H     | 0.000225658 | 0.999989 | 0.000225658 | 0.999989 |
| PhCCH+CH3      | 3.90994e-06 | 0.999993 | 3.90994e-06 | 0.999993 |
| C2H2+PhCH2     | 2.79605e-06 | 0.999995 | 2.79605e-06 | 0.999995 |
| PhCCCH3+H      | 2.20592e-06 | 0.999998 | 2.20592e-06 | 0.999998 |
| Ph+MeAc        | 1.64418e-06 | 0.999999 | 1.64418e-06 | 0.999999 |
| rad67          | 4.97514e-07 | 1.000000 | 4.97514e-07 | 1.000000 |
| rad35          | 2.19879e-07 | 1.000000 | 2.19879e-07 | 1.000000 |
| Ph+Allene      | 1.44942e-07 | 1.000000 | 1.44942e-07 | 1.000000 |
| PAH7+H         | 1.90048e-08 | 1.000000 | 1.90048e-08 | 1.000000 |
| PhCH2CCH+H     | 1.78174e-08 | 1.000000 | 1.78174e-08 | 1.000000 |
| rad39          | 5.36057e-09 | 1.000000 | 5.36057e-09 | 1.000000 |
| rad37          | 4.94868e-09 | 1.000000 | 4.94868e-09 | 1.000000 |
| rad30          | 4.11419e-09 | 1.000000 | 4.11419e-09 | 1.000000 |
| PAH9+H         | 2.71352e-10 | 1.000000 | 2.71352e-10 | 1.000000 |
| rad38          | 1.14954e-10 | 1.000000 | 1.14954e-10 | 1.000000 |
| rad60syn       | 1.81880e-11 | 1.000000 | 1.81880e-11 | 1.000000 |
| rad60anti      | 8.89466e-12 | 1.000000 | 8.89466e-12 | 1.000000 |
| PAH3+H         | 7.40206e-12 | 1.000000 | 7.40206e-12 | 1.000000 |
| rad46          | 6.94584e-12 | 1.000000 | 6.94584e-12 | 1.000000 |
| PAH10+CH3      | 6.33665e-12 | 1.000000 | 6.33665e-12 | 1.000000 |
| rad59          | 1.53025e-12 | 1.000000 | 1.53025e-12 | 1.000000 |
| PhcycC3H3_A+H  | 5.85937e-13 | 1.000000 | 5.85937e-13 | 1.000000 |
| rad43          | 2.92252e-13 | 1.000000 | 2.92252e-13 | 1.000000 |
| rad54          | 2.35374e-13 | 1.000000 | 2.35374e-13 | 1.000000 |
| rad62          | 6.28791e-14 | 1.000000 | 6.28791e-14 | 1.000000 |
| rad50          | 4.73675e-14 | 1.000000 | 4.73675e-14 | 1.000000 |
| rad70          | 3.74676e-15 | 1.000000 | 3.74676e-15 | 1.000000 |
| rad55          | 1.64775e-15 | 1.000000 | 1.64775e-15 | 1.000000 |
| PAH1+H         | 7.14028e-16 | 1.000000 | 7.14028e-16 | 1.000000 |
| rad52          | 3.07655e-16 | 1.000000 | 3.07655e-16 | 1.000000 |
| Phenyl+cycC3H4 | 2.36668e-16 | 1.000000 | 0.000000    | 1.000000 |

|                               |             |         |             |         |
|-------------------------------|-------------|---------|-------------|---------|
| rad58                         | 9.10706e-17 | 1.00000 | 9.10706e-17 | 1.00000 |
| rad51                         | 7.70607e-17 | 1.00000 | 7.70607e-17 | 1.00000 |
| rad34                         | 3.76207e-17 | 1.00000 | 3.76207e-17 | 1.00000 |
| rad42                         | 4.07396e-18 | 1.00000 | 4.07396e-18 | 1.00000 |
| rad41                         | 4.02391e-18 | 1.00000 | 4.02391e-18 | 1.00000 |
| Benzene+cycloprop-2-enylidene | 3.18404e-18 | 1.00000 | 3.18404e-18 | 1.00000 |
| rad65                         | 1.53995e-18 | 1.00000 | 1.53995e-18 | 1.00000 |
| PhcycC3H3_B+H                 | 2.98283e-22 | 1.00000 | 2.98283e-22 | 1.00000 |
| rad53                         | 8.13836e-27 | 1.00000 | 8.13836e-27 | 1.00000 |
| rad64                         | 5.78556e-30 | 1.00000 | 5.78556e-30 | 1.00000 |
| Benzene+cycloprop-1-enylidene | 2.85507e-33 | 1.00000 | 2.85507e-33 | 1.00000 |
| rad26                         | 1.83949e-33 | 1.00000 | 1.83949e-33 | 1.00000 |
| rad47                         | 1.37437e-33 | 1.00000 | 1.37437e-33 | 1.00000 |
| rad6                          | 6.18810e-34 | 1.00000 | 6.18810e-34 | 1.00000 |
| rad28                         | 5.13390e-34 | 1.00000 | 5.13390e-34 | 1.00000 |
| rad2                          | 3.15995e-36 | 1.00000 | 3.15995e-36 | 1.00000 |
| rad14                         | 5.60681e-37 | 1.00000 | 5.60681e-37 | 1.00000 |
| rad25                         | 2.63922e-37 | 1.00000 | 2.63922e-37 | 1.00000 |
| rad1                          | 2.00257e-37 | 1.00000 | 2.00257e-37 | 1.00000 |
| rad10                         | 1.76376e-37 | 1.00000 | 1.76376e-37 | 1.00000 |
| rad19anti                     | 7.56647e-38 | 1.00000 | 7.56647e-38 | 1.00000 |
| rad27                         | 5.39173e-38 | 1.00000 | 5.39173e-38 | 1.00000 |
| rad7                          | 4.47369e-38 | 1.00000 | 4.47369e-38 | 1.00000 |
| rad3                          | 3.97644e-38 | 1.00000 | 3.97644e-38 | 1.00000 |
| rad4                          | 2.00976e-38 | 1.00000 | 2.00976e-38 | 1.00000 |
| rad11                         | 1.17544e-38 | 1.00000 | 1.17544e-38 | 1.00000 |
| rad9                          | 4.58682e-40 | 1.00000 | 4.58682e-40 | 1.00000 |
| rad13                         | 2.47419e-40 | 1.00000 | 2.47419e-40 | 1.00000 |
| rad5                          | 1.27715e-40 | 1.00000 | 1.27715e-40 | 1.00000 |
| rad61                         | 1.95110e-41 | 1.00000 | 1.95110e-41 | 1.00000 |
| rad31                         | 4.10754e-42 | 1.00000 | 4.10754e-42 | 1.00000 |
| rad33                         | 2.71603e-42 | 1.00000 | 2.71603e-42 | 1.00000 |
| rad15                         | 2.01711e-43 | 1.00000 | 2.01711e-43 | 1.00000 |
| rad56                         | 1.18498e-43 | 1.00000 | 1.18498e-43 | 1.00000 |
| rad20                         | 1.62472e-44 | 1.00000 | 1.62472e-44 | 1.00000 |
| rad21                         | 1.29446e-44 | 1.00000 | 1.29446e-44 | 1.00000 |
| rad68syn                      | 9.39641e-46 | 1.00000 | 9.39641e-46 | 1.00000 |
| rad68anti                     | 8.02868e-46 | 1.00000 | 8.02868e-46 | 1.00000 |
| rad18                         | 1.92536e-46 | 1.00000 | 1.92536e-46 | 1.00000 |
| rad12                         | 1.35290e-46 | 1.00000 | 1.35290e-46 | 1.00000 |
| rad19syn                      | 1.15714e-47 | 1.00000 | 1.15714e-47 | 1.00000 |
| rad22                         | 9.41403e-49 | 1.00000 | 9.41403e-49 | 1.00000 |
| rad23                         | 8.26576e-49 | 1.00000 | 8.26576e-49 | 1.00000 |
| rad24                         | 2.40030e-50 | 1.00000 | 2.40030e-50 | 1.00000 |
| rad45                         | 6.45377e-51 | 1.00000 | 6.45377e-51 | 1.00000 |
| rad36                         | 3.95462e-52 | 1.00000 | 3.95462e-52 | 1.00000 |
| rad73                         | 9.15254e-54 | 1.00000 | 9.15254e-54 | 1.00000 |
| rad40syn                      | 2.11570e-54 | 1.00000 | 2.11570e-54 | 1.00000 |
| rad40anti                     | 1.74111e-54 | 1.00000 | 1.74111e-54 | 1.00000 |
| PAH8+H                        | 9.50859e-59 | 1.00000 | 9.50859e-59 | 1.00000 |
| rad71                         | 2.15899e-62 | 1.00000 | 2.15899e-62 | 1.00000 |
| rad8                          | 9.04687e-68 | 1.00000 | 9.04687e-68 | 1.00000 |

0.100000000E-07 Pa, 60.000000 K

| Rate constant             | True (fraction)        | Effective (fraction)   |
|---------------------------|------------------------|------------------------|
| Total                     | 6.93738e-17 (1.00)     | 6.93738e-17 (1.00)     |
| Formation of rad19        | 6.93738e-17 (1.000)    | 6.93738e-17 (1.000)    |
| H-abstraction to cyc2enyl | 2.50609e-31 (3.61e-15) | 2.50609e-31 (3.61e-15) |
| H-abstraction to cyc1enyl | 7.62015e-44 (1.10e-27) | 7.62015e-44 (1.10e-27) |

| species    | PYtrue      | Cumul    | PYeffective | Cumul    |
|------------|-------------|----------|-------------|----------|
| Indene+H   | 0.999758    | 0.999758 | 0.999758    | 0.999758 |
| PhCHCCH2+H | 0.000230121 | 0.999988 | 0.000230121 | 0.999988 |
| PhCCH+CH3  | 3.99427e-06 | 0.999992 | 3.99427e-06 | 0.999992 |
| C2H2+PhCH2 | 2.86797e-06 | 0.999995 | 2.86797e-06 | 0.999995 |
| PhCCCH3+H  | 2.25806e-06 | 0.999997 | 2.25806e-06 | 0.999997 |
| Ph+MeAc    | 1.69157e-06 | 0.999999 | 1.69157e-06 | 0.999999 |
| rad67      | 5.11098e-07 | 0.999999 | 5.11098e-07 | 0.999999 |
| rad35      | 2.25634e-07 | 1.000000 | 2.25634e-07 | 1.000000 |
| Ph+Allene  | 1.50530e-07 | 1.000000 | 1.50530e-07 | 1.000000 |
| PAH7+H     | 1.96327e-08 | 1.000000 | 1.96327e-08 | 1.000000 |
| PhCH2CCH+H | 1.86153e-08 | 1.000000 | 1.86153e-08 | 1.000000 |
| rad39      | 5.53820e-09 | 1.000000 | 5.53820e-09 | 1.000000 |
| rad37      | 5.12226e-09 | 1.000000 | 5.12226e-09 | 1.000000 |
| rad30      | 4.22418e-09 | 1.000000 | 4.22418e-09 | 1.000000 |
| PAH9+H     | 2.80739e-10 | 1.000000 | 2.80739e-10 | 1.000000 |
| rad38      | 1.19306e-10 | 1.000000 | 1.19306e-10 | 1.000000 |

|                               |             |          |             |          |
|-------------------------------|-------------|----------|-------------|----------|
| rad60syn                      | 1.88685e-11 | 1.000000 | 1.88685e-11 | 1.000000 |
| rad60anti                     | 9.23591e-12 | 1.000000 | 9.23591e-12 | 1.000000 |
| PAH3+H                        | 7.77808e-12 | 1.000000 | 7.77808e-12 | 1.000000 |
| rad46                         | 7.22908e-12 | 1.000000 | 7.22908e-12 | 1.000000 |
| PAH10+CH3                     | 6.79612e-12 | 1.000000 | 6.79612e-12 | 1.000000 |
| rad59                         | 1.60493e-12 | 1.000000 | 1.60493e-12 | 1.000000 |
| PhcycC3H3_A+H                 | 6.95715e-13 | 1.000000 | 6.95715e-13 | 1.000000 |
| rad43                         | 3.11028e-13 | 1.000000 | 3.11028e-13 | 1.000000 |
| rad54                         | 2.52187e-13 | 1.000000 | 2.52187e-13 | 1.000000 |
| rad62                         | 6.70704e-14 | 1.000000 | 6.70704e-14 | 1.000000 |
| rad50                         | 5.01888e-14 | 1.000000 | 5.01888e-14 | 1.000000 |
| rad70                         | 4.10054e-15 | 1.000000 | 4.10054e-15 | 1.000000 |
| Benzene+cycloprop-2-enylidene | 3.61245e-15 | 1.000000 | 3.61245e-15 | 1.000000 |
| rad55                         | 1.80524e-15 | 1.000000 | 1.80524e-15 | 1.000000 |
| PAH1+H                        | 8.09571e-16 | 1.000000 | 8.09571e-16 | 1.000000 |
| Phenyl+cycC3H4                | 4.45921e-16 | 1.000000 | 0.000000    | 1.000000 |
| rad52                         | 3.30434e-16 | 1.000000 | 3.30434e-16 | 1.000000 |
| rad58                         | 1.00588e-16 | 1.000000 | 1.00588e-16 | 1.000000 |
| rad51                         | 8.41470e-17 | 1.000000 | 8.41470e-17 | 1.000000 |
| rad34                         | 4.27629e-17 | 1.000000 | 4.27629e-17 | 1.000000 |
| rad41                         | 4.87030e-18 | 1.000000 | 4.87030e-18 | 1.000000 |
| rad42                         | 4.76393e-18 | 1.000000 | 4.76393e-18 | 1.000000 |
| rad65                         | 1.69577e-18 | 1.000000 | 1.69577e-18 | 1.000000 |
| PhcycC3H3_B+H                 | 1.47017e-20 | 1.000000 | 1.47017e-20 | 1.000000 |
| rad53                         | 3.73122e-25 | 1.000000 | 3.73122e-25 | 1.000000 |
| Benzene+cycloprop-1-enylidene | 1.09842e-27 | 1.000000 | 1.09842e-27 | 1.000000 |
| rad64                         | 9.21628e-28 | 1.000000 | 9.21628e-28 | 1.000000 |
| rad26                         | 1.43553e-33 | 1.000000 | 1.43553e-33 | 1.000000 |
| rad47                         | 1.12620e-33 | 1.000000 | 1.12620e-33 | 1.000000 |
| rad6                          | 4.05987e-34 | 1.000000 | 4.05987e-34 | 1.000000 |
| rad28                         | 3.92701e-34 | 1.000000 | 3.92701e-34 | 1.000000 |
| rad61                         | 4.84973e-35 | 1.000000 | 4.84973e-35 | 1.000000 |
| rad2                          | 3.43764e-36 | 1.000000 | 3.43764e-36 | 1.000000 |
| rad14                         | 4.54809e-37 | 1.000000 | 4.54809e-37 | 1.000000 |
| rad1                          | 2.18293e-37 | 1.000000 | 2.18293e-37 | 1.000000 |
| rad25                         | 2.16692e-37 | 1.000000 | 2.16692e-37 | 1.000000 |
| rad10                         | 1.63948e-37 | 1.000000 | 1.63948e-37 | 1.000000 |
| rad19anti                     | 8.79993e-38 | 1.000000 | 8.79993e-38 | 1.000000 |
| rad3                          | 4.46605e-38 | 1.000000 | 4.46605e-38 | 1.000000 |
| rad27                         | 4.44347e-38 | 1.000000 | 4.44347e-38 | 1.000000 |
| rad7                          | 2.93857e-38 | 1.000000 | 2.93857e-38 | 1.000000 |
| rad4                          | 2.25819e-38 | 1.000000 | 2.25819e-38 | 1.000000 |
| rad11                         | 7.86159e-39 | 1.000000 | 7.86159e-39 | 1.000000 |
| rad9                          | 4.12633e-40 | 1.000000 | 4.12633e-40 | 1.000000 |
| rad13                         | 1.62641e-40 | 1.000000 | 1.62641e-40 | 1.000000 |
| rad5                          | 9.88495e-41 | 1.000000 | 9.88495e-41 | 1.000000 |
| rad31                         | 4.41910e-42 | 1.000000 | 4.41910e-42 | 1.000000 |
| rad33                         | 2.25930e-42 | 1.000000 | 2.25930e-42 | 1.000000 |
| rad56                         | 6.11503e-43 | 1.000000 | 6.11503e-43 | 1.000000 |
| rad15                         | 1.81448e-43 | 1.000000 | 1.81448e-43 | 1.000000 |
| rad20                         | 1.44207e-44 | 1.000000 | 1.44207e-44 | 1.000000 |
| rad21                         | 1.15369e-44 | 1.000000 | 1.15369e-44 | 1.000000 |
| rad68syn                      | 4.98097e-45 | 1.000000 | 4.98097e-45 | 1.000000 |
| rad68anti                     | 4.25203e-45 | 1.000000 | 4.25203e-45 | 1.000000 |
| rad18                         | 1.63559e-46 | 1.000000 | 1.63559e-46 | 1.000000 |
| rad12                         | 1.34263e-46 | 1.000000 | 1.34263e-46 | 1.000000 |
| rad19syn                      | 1.80508e-47 | 1.000000 | 1.80508e-47 | 1.000000 |
| rad22                         | 7.78305e-49 | 1.000000 | 7.78305e-49 | 1.000000 |
| rad23                         | 7.22721e-49 | 1.000000 | 7.22721e-49 | 1.000000 |
| rad24                         | 2.29768e-50 | 1.000000 | 2.29768e-50 | 1.000000 |
| rad45                         | 6.81362e-51 | 1.000000 | 6.81362e-51 | 1.000000 |
| rad36                         | 4.17344e-52 | 1.000000 | 4.17344e-52 | 1.000000 |
| rad73                         | 5.37830e-53 | 1.000000 | 5.37830e-53 | 1.000000 |
| rad40syn                      | 1.54572e-53 | 1.000000 | 1.54572e-53 | 1.000000 |
| rad40anti                     | 1.27006e-53 | 1.000000 | 1.27006e-53 | 1.000000 |
| PAH8+H                        | 7.80377e-58 | 1.000000 | 7.80377e-58 | 1.000000 |
| rad71                         | 1.56443e-61 | 1.000000 | 1.56443e-61 | 1.000000 |
| rad8                          | 9.43551e-68 | 1.000000 | 9.43551e-68 | 1.000000 |

0.100000000E-07 Pa, 70.0000000 K

| Rate constant             | True (fraction)        | Effective (fraction)   |
|---------------------------|------------------------|------------------------|
| Total                     | 1.91520e-16 (1.00 )    | 1.91520e-16 (1.00 )    |
| Formation of rad19        | 1.91520e-16 (1.000 )   | 1.91520e-16 (1.000 )   |
| H-abstraction to cyc2enyl | 1.01125e-28 (5.28e-13) | 1.01125e-28 (5.28e-13) |
| H-abstraction to cyclenyl | 1.97822e-39 (1.03e-23) | 1.97822e-39 (1.03e-23) |

  

| species | PYtrue | Cumul | PYeffective | Cumul |
|---------|--------|-------|-------------|-------|
| -----   |        |       |             |       |

|                               |             |          |             |          |
|-------------------------------|-------------|----------|-------------|----------|
| Indene+H                      | 0.999753    | 0.999753 | 0.999753    | 0.999753 |
| PhCHCCH2+H                    | 0.000235006 | 0.999988 | 0.000235006 | 0.999988 |
| PhCCH+CH3                     | 4.08659e-06 | 0.999992 | 4.08659e-06 | 0.999992 |
| C2H2+PhCH2                    | 2.94722e-06 | 0.999995 | 2.94722e-06 | 0.999995 |
| PhCCCH3+H                     | 2.31532e-06 | 0.999997 | 2.31532e-06 | 0.999997 |
| Ph+MeAc                       | 1.74394e-06 | 0.999999 | 1.74394e-06 | 0.999999 |
| rad67                         | 5.26090e-07 | 1.000000 | 5.26090e-07 | 1.000000 |
| rad35                         | 2.31978e-07 | 1.000000 | 2.31978e-07 | 1.000000 |
| Ph+Allene                     | 1.56781e-07 | 1.000000 | 1.56781e-07 | 1.000000 |
| PAH7+H                        | 2.03305e-08 | 1.000000 | 2.03305e-08 | 1.000000 |
| PhCH2CCH+H                    | 1.95142e-08 | 1.000000 | 1.95142e-08 | 1.000000 |
| rad39                         | 5.73559e-09 | 1.000000 | 5.73559e-09 | 1.000000 |
| rad37                         | 5.31557e-09 | 1.000000 | 5.31557e-09 | 1.000000 |
| rad30                         | 4.34562e-09 | 1.000000 | 4.34562e-09 | 1.000000 |
| PAH9+H                        | 2.91202e-10 | 1.000000 | 2.91202e-10 | 1.000000 |
| rad38                         | 1.24178e-10 | 1.000000 | 1.24178e-10 | 1.000000 |
| rad60syn                      | 1.96290e-11 | 1.000000 | 1.96290e-11 | 1.000000 |
| rad60anti                     | 9.61777e-12 | 1.000000 | 9.61777e-12 | 1.000000 |
| PAH3+H                        | 8.20481e-12 | 1.000000 | 8.20481e-12 | 1.000000 |
| rad46                         | 7.54709e-12 | 1.000000 | 7.54709e-12 | 1.000000 |
| PAH10+CH3                     | 7.32916e-12 | 1.000000 | 7.32916e-12 | 1.000000 |
| rad59                         | 1.68948e-12 | 1.000000 | 1.68948e-12 | 1.000000 |
| PhcycC3H3_A+H                 | 8.34926e-13 | 1.000000 | 8.34926e-13 | 1.000000 |
| Benzene+cycloprop-2-enylidene | 5.28015e-13 | 1.000000 | 5.28015e-13 | 1.000000 |
| rad43                         | 3.32593e-13 | 1.000000 | 3.32593e-13 | 1.000000 |
| rad54                         | 2.71678e-13 | 1.000000 | 2.71678e-13 | 1.000000 |
| rad62                         | 7.18916e-14 | 1.000000 | 7.18916e-14 | 1.000000 |
| rad50                         | 5.34248e-14 | 1.000000 | 5.34248e-14 | 1.000000 |
| rad70                         | 4.52036e-15 | 1.000000 | 4.52036e-15 | 1.000000 |
| rad55                         | 1.99187e-15 | 1.000000 | 1.99187e-15 | 1.000000 |
| PAH1+H                        | 9.26902e-16 | 1.000000 | 9.26902e-16 | 1.000000 |
| Phenyl+cycC3H4                | 7.87809e-16 | 1.000000 | 0.000000    | 1.000000 |
| rad52                         | 3.56973e-16 | 1.000000 | 3.56973e-16 | 1.000000 |
| rad58                         | 1.11992e-16 | 1.000000 | 1.11992e-16 | 1.000000 |
| rad51                         | 9.25595e-17 | 1.000000 | 9.25595e-17 | 1.000000 |
| rad34                         | 4.90706e-17 | 1.000000 | 4.90706e-17 | 1.000000 |
| rad41                         | 5.95426e-18 | 1.000000 | 5.95426e-18 | 1.000000 |
| rad42                         | 5.64287e-18 | 1.000000 | 5.64287e-18 | 1.000000 |
| rad65                         | 1.88240e-18 | 1.000000 | 1.88240e-18 | 1.000000 |
| PhcycC3H3_B+H                 | 2.38334e-19 | 1.000000 | 2.38334e-19 | 1.000000 |
| Benzene+cycloprop-1-enylidene | 1.03290e-23 | 1.000000 | 1.03290e-23 | 1.000000 |
| rad53                         | 5.56944e-24 | 1.000000 | 5.56944e-24 | 1.000000 |
| rad64                         | 3.39556e-26 | 1.000000 | 3.39556e-26 | 1.000000 |
| rad61                         | 5.68423e-32 | 1.000000 | 5.68423e-32 | 1.000000 |
| rad26                         | 1.17193e-33 | 1.000000 | 1.17193e-33 | 1.000000 |
| rad47                         | 9.65474e-34 | 1.000000 | 9.65474e-34 | 1.000000 |
| rad28                         | 3.15621e-34 | 1.000000 | 3.15621e-34 | 1.000000 |
| rad6                          | 2.90523e-34 | 1.000000 | 2.90523e-34 | 1.000000 |
| rad56                         | 2.32701e-35 | 1.000000 | 2.32701e-35 | 1.000000 |
| rad2                          | 3.25932e-36 | 1.000000 | 3.25932e-36 | 1.000000 |
| rad14                         | 3.87166e-37 | 1.000000 | 3.87166e-37 | 1.000000 |
| rad1                          | 2.07458e-37 | 1.000000 | 2.07458e-37 | 1.000000 |
| rad25                         | 1.86910e-37 | 1.000000 | 1.86910e-37 | 1.000000 |
| rad10                         | 1.60196e-37 | 1.000000 | 1.60196e-37 | 1.000000 |
| rad19anti                     | 1.14994e-37 | 1.000000 | 1.14994e-37 | 1.000000 |
| rad3                          | 4.73681e-38 | 1.000000 | 4.73681e-38 | 1.000000 |
| rad27                         | 3.85079e-38 | 1.000000 | 3.85079e-38 | 1.000000 |
| rad4                          | 2.39635e-38 | 1.000000 | 2.39635e-38 | 1.000000 |
| rad7                          | 2.10564e-38 | 1.000000 | 2.10564e-38 | 1.000000 |
| rad11                         | 5.73912e-39 | 1.000000 | 5.73912e-39 | 1.000000 |
| rad9                          | 4.03293e-40 | 1.000000 | 4.03293e-40 | 1.000000 |
| rad13                         | 1.16642e-40 | 1.000000 | 1.16642e-40 | 1.000000 |
| rad5                          | 8.07310e-41 | 1.000000 | 8.07310e-41 | 1.000000 |
| rad31                         | 5.25659e-42 | 1.000000 | 5.25659e-42 | 1.000000 |
| rad33                         | 2.01449e-42 | 1.000000 | 2.01449e-42 | 1.000000 |
| rad15                         | 1.77290e-43 | 1.000000 | 1.77290e-43 | 1.000000 |
| rad68syn                      | 8.35689e-44 | 1.000000 | 8.35689e-44 | 1.000000 |
| rad68anti                     | 7.12847e-44 | 1.000000 | 7.12847e-44 | 1.000000 |
| rad20                         | 1.35932e-44 | 1.000000 | 1.35932e-44 | 1.000000 |
| rad21                         | 1.09265e-44 | 1.000000 | 1.09265e-44 | 1.000000 |
| rad18                         | 1.46622e-46 | 1.000000 | 1.46622e-46 | 1.000000 |
| rad12                         | 1.44091e-46 | 1.000000 | 1.44091e-46 | 1.000000 |
| rad19syn                      | 3.07655e-47 | 1.000000 | 3.07655e-47 | 1.000000 |
| rad23                         | 7.10621e-49 | 1.000000 | 7.10621e-49 | 1.000000 |
| rad22                         | 6.76607e-49 | 1.000000 | 6.76607e-49 | 1.000000 |
| rad24                         | 2.36069e-50 | 1.000000 | 2.36069e-50 | 1.000000 |
| rad45                         | 7.73663e-51 | 1.000000 | 7.73663e-51 | 1.000000 |
| rad73                         | 9.69701e-52 | 1.000000 | 9.69701e-52 | 1.000000 |
| rad36                         | 4.73737e-52 | 1.000000 | 4.73737e-52 | 1.000000 |
| rad40syn                      | 2.86238e-52 | 1.000000 | 2.86238e-52 | 1.000000 |



|           |             |         |             |         |
|-----------|-------------|---------|-------------|---------|
| rad40anti | 2.34562e-52 | 1.00000 | 2.34562e-52 | 1.00000 |
| PAH8+H    | 1.67105e-56 | 1.00000 | 1.67105e-56 | 1.00000 |
| rad71     | 3.35676e-60 | 1.00000 | 3.35676e-60 | 1.00000 |
| rad8      | 1.06794e-67 | 1.00000 | 1.06794e-67 | 1.00000 |

0.100000000E-07 Pa, 80.0000000 K

```

=====
Rate constant      | True (fraction)      Effective (fraction)
-----
Total              | 4.17084e-16 (1.00   ) 4.17084e-16 (1.00   )
Formation of rad19| 4.17084e-16 (1.000  ) 4.17084e-16 (1.000  )
H-abstraction to cyc2enyl| 8.98751e-27 (2.15e-11) 8.98751e-27 (2.15e-11)
H-abstraction to cyclenyl| 4.00120e-36 (9.59e-21) 4.00120e-36 (9.59e-21)

```

| species                       | PYtrue      | Cumul    | PYeffective | Cumul    |
|-------------------------------|-------------|----------|-------------|----------|
| Indene+H                      | 0.999747    | 0.999747 | 0.999747    | 0.999747 |
| PhCHCCH2+H                    | 0.000240278 | 0.999987 | 0.000240278 | 0.999987 |
| PhCCH+CH3                     | 4.18618e-06 | 0.999991 | 4.18618e-06 | 0.999991 |
| C2H2+PhCH2                    | 3.03335e-06 | 0.999994 | 3.03335e-06 | 0.999994 |
| PhCCCH3+H                     | 2.37733e-06 | 0.999997 | 2.37733e-06 | 0.999997 |
| Ph+MeAc                       | 1.80101e-06 | 0.999999 | 1.80101e-06 | 0.999999 |
| rad67                         | 5.42408e-07 | 0.999999 | 5.42408e-07 | 0.999999 |
| rad35                         | 2.38874e-07 | 0.999999 | 2.38874e-07 | 0.999999 |
| Ph+Allene                     | 1.63686e-07 | 1.000000 | 1.63686e-07 | 1.000000 |
| PAH7+H                        | 2.10959e-08 | 1.000000 | 2.10959e-08 | 1.000000 |
| PhCH2CCH+H                    | 2.05146e-08 | 1.000000 | 2.05146e-08 | 1.000000 |
| rad39                         | 5.95207e-09 | 1.000000 | 5.95207e-09 | 1.000000 |
| rad37                         | 5.52806e-09 | 1.000000 | 5.52806e-09 | 1.000000 |
| rad30                         | 4.47786e-09 | 1.000000 | 4.47786e-09 | 1.000000 |
| PAH9+H                        | 3.02716e-10 | 1.000000 | 3.02716e-10 | 1.000000 |
| rad38                         | 1.29567e-10 | 1.000000 | 1.29567e-10 | 1.000000 |
| Benzene+cycloprop-2-enylidene | 2.15484e-11 | 1.000000 | 2.15484e-11 | 1.000000 |
| rad60syn                      | 2.04685e-11 | 1.000000 | 2.04685e-11 | 1.000000 |
| rad60anti                     | 1.00397e-11 | 1.000000 | 1.00397e-11 | 1.000000 |
| PAH3+H                        | 8.68358e-12 | 1.000000 | 8.68358e-12 | 1.000000 |
| PAH10+CH3                     | 7.94154e-12 | 1.000000 | 7.94154e-12 | 1.000000 |
| rad46                         | 7.89977e-12 | 1.000000 | 7.89977e-12 | 1.000000 |
| rad59                         | 1.78410e-12 | 1.000000 | 1.78410e-12 | 1.000000 |
| PhcycC3H3_A+H                 | 1.01061e-12 | 1.000000 | 1.01061e-12 | 1.000000 |
| rad43                         | 3.57097e-13 | 1.000000 | 3.57097e-13 | 1.000000 |
| rad54                         | 2.94055e-13 | 1.000000 | 2.94055e-13 | 1.000000 |
| rad62                         | 7.73784e-14 | 1.000000 | 7.73784e-14 | 1.000000 |
| rad50                         | 5.70981e-14 | 1.000000 | 5.70981e-14 | 1.000000 |
| rad70                         | 5.01449e-15 | 1.000000 | 5.01449e-15 | 1.000000 |
| rad55                         | 2.21137e-15 | 1.000000 | 2.21137e-15 | 1.000000 |
| Phenyl+cycC3H4                | 1.32430e-15 | 1.000000 | 0.000000    | 1.000000 |
| PAH1+H                        | 1.07021e-15 | 1.000000 | 1.07021e-15 | 1.000000 |
| rad52                         | 3.87617e-16 | 1.000000 | 3.87617e-16 | 1.000000 |
| rad58                         | 1.25561e-16 | 1.000000 | 1.25561e-16 | 1.000000 |
| rad51                         | 1.02472e-16 | 1.000000 | 1.02472e-16 | 1.000000 |
| rad34                         | 5.67860e-17 | 1.000000 | 5.67860e-17 | 1.000000 |
| rad41                         | 7.33020e-18 | 1.000000 | 7.33020e-18 | 1.000000 |
| rad42                         | 6.74822e-18 | 1.000000 | 6.74822e-18 | 1.000000 |
| rad65                         | 2.10442e-18 | 1.000000 | 2.10442e-18 | 1.000000 |
| PhcycC3H3_B+H                 | 1.96138e-18 | 1.000000 | 1.96138e-18 | 1.000000 |
| Benzene+cycloprop-1-enylidene | 9.59328e-21 | 1.000000 | 9.59328e-21 | 1.000000 |
| rad53                         | 4.18956e-23 | 1.000000 | 4.18956e-23 | 1.000000 |
| rad64                         | 5.09107e-25 | 1.000000 | 5.09107e-25 | 1.000000 |
| rad61                         | 8.41954e-30 | 1.000000 | 8.41954e-30 | 1.000000 |
| rad56                         | 1.31867e-32 | 1.000000 | 1.31867e-32 | 1.000000 |
| rad26                         | 9.87370e-34 | 1.000000 | 9.87370e-34 | 1.000000 |
| rad47                         | 8.54859e-34 | 1.000000 | 8.54859e-34 | 1.000000 |
| rad28                         | 2.62449e-34 | 1.000000 | 2.62449e-34 | 1.000000 |
| rad6                          | 2.20667e-34 | 1.000000 | 2.20667e-34 | 1.000000 |
| rad68syn                      | 1.87136e-34 | 1.000000 | 1.87136e-34 | 1.000000 |
| rad68anti                     | 1.57600e-34 | 1.000000 | 1.57600e-34 | 1.000000 |
| rad2                          | 3.28414e-36 | 1.000000 | 3.28414e-36 | 1.000000 |
| rad14                         | 3.41135e-37 | 1.000000 | 3.41135e-37 | 1.000000 |
| rad1                          | 2.09586e-37 | 1.000000 | 2.09586e-37 | 1.000000 |
| rad10                         | 1.74852e-37 | 1.000000 | 1.74852e-37 | 1.000000 |
| rad25                         | 1.67001e-37 | 1.000000 | 1.67001e-37 | 1.000000 |
| rad19anti                     | 1.65192e-37 | 1.000000 | 1.65192e-37 | 1.000000 |
| rad3                          | 4.10964e-38 | 1.000000 | 4.10964e-38 | 1.000000 |
| rad27                         | 3.45963e-38 | 1.000000 | 3.45963e-38 | 1.000000 |
| rad4                          | 2.08033e-38 | 1.000000 | 2.08033e-38 | 1.000000 |
| rad7                          | 1.60167e-38 | 1.000000 | 1.60167e-38 | 1.000000 |
| rad11                         | 4.45108e-39 | 1.000000 | 4.45108e-39 | 1.000000 |
| rad9                          | 4.18549e-40 | 1.000000 | 4.18549e-40 | 1.000000 |
| rad13                         | 8.88119e-41 | 1.000000 | 8.88119e-41 | 1.000000 |

|           |             |          |             |          |
|-----------|-------------|----------|-------------|----------|
| rad5      | 6.84254e-41 | 1.000000 | 6.84254e-41 | 1.000000 |
| rad31     | 6.77589e-42 | 1.000000 | 6.77589e-42 | 1.000000 |
| rad33     | 1.88657e-42 | 1.000000 | 1.88657e-42 | 1.000000 |
| rad15     | 1.83933e-43 | 1.000000 | 1.83933e-43 | 1.000000 |
| rad20     | 1.33876e-44 | 1.000000 | 1.33876e-44 | 1.000000 |
| rad21     | 1.08179e-44 | 1.000000 | 1.08179e-44 | 1.000000 |
| rad12     | 1.64040e-46 | 1.000000 | 1.64040e-46 | 1.000000 |
| rad18     | 1.36601e-46 | 1.000000 | 1.36601e-46 | 1.000000 |
| rad19syn  | 5.56519e-47 | 1.000000 | 5.56519e-47 | 1.000000 |
| rad23     | 7.78163e-49 | 1.000000 | 7.78163e-49 | 1.000000 |
| rad22     | 6.09440e-49 | 1.000000 | 6.09440e-49 | 1.000000 |
| rad73     | 1.03568e-49 | 1.000000 | 1.03568e-49 | 1.000000 |
| rad24     | 2.55628e-50 | 1.000000 | 2.55628e-50 | 1.000000 |
| rad40syn  | 2.29075e-50 | 1.000000 | 2.29075e-50 | 1.000000 |
| rad40anti | 1.86932e-50 | 1.000000 | 1.86932e-50 | 1.000000 |
| rad45     | 7.82697e-51 | 1.000000 | 7.82697e-51 | 1.000000 |
| rad36     | 4.79173e-52 | 1.000000 | 4.79173e-52 | 1.000000 |
| PAH8+H    | 1.56151e-54 | 1.000000 | 1.56151e-54 | 1.000000 |
| rad71     | 3.88539e-58 | 1.000000 | 3.88539e-58 | 1.000000 |
| rad8      | 1.28435e-67 | 1.000000 | 1.28435e-67 | 1.000000 |

0.100000000E-07 Pa, 90.000000 K

| Rate constant             | True (fraction)        | Effective (fraction)   |
|---------------------------|------------------------|------------------------|
| Total                     | 7.74016e-16 (1.00 )    | 7.74016e-16 (1.00 )    |
| Formation of rad19        | 7.74016e-16 (1.000 )   | 7.74016e-16 (1.000 )   |
| H-abstraction to cyc2enyl | 2.91736e-25 (3.77e-10) | 2.91736e-25 (3.77e-10) |
| H-abstraction to cyclenyl | 1.47814e-33 (1.91e-18) | 1.47814e-33 (1.91e-18) |

| species                       | PYtrue      | Cumul    | PYeffective | Cumul    |
|-------------------------------|-------------|----------|-------------|----------|
| Indene+H                      | 0.999741    | 0.999741 | 0.999741    | 0.999741 |
| PhCHCCH2+H                    | 0.000245933 | 0.999987 | 0.000245933 | 0.999987 |
| PhCCH+CH3                     | 4.29301e-06 | 0.999991 | 4.29301e-06 | 0.999991 |
| C2H2+PhCH2                    | 3.12644e-06 | 0.999994 | 3.12644e-06 | 0.999994 |
| PhCCCH3+H                     | 2.44411e-06 | 0.999997 | 2.44411e-06 | 0.999997 |
| Ph+MeAc                       | 1.86289e-06 | 0.999999 | 1.86289e-06 | 0.999999 |
| rad67                         | 5.60078e-07 | 0.999999 | 5.60078e-07 | 0.999999 |
| rad35                         | 2.46332e-07 | 0.999999 | 2.46332e-07 | 0.999999 |
| Ph+Allene                     | 1.71280e-07 | 1.000000 | 1.71280e-07 | 1.000000 |
| PAH7+H                        | 2.19315e-08 | 1.000000 | 2.19315e-08 | 1.000000 |
| PhCH2CCH+H                    | 2.16239e-08 | 1.000000 | 2.16239e-08 | 1.000000 |
| rad39                         | 6.18834e-09 | 1.000000 | 6.18834e-09 | 1.000000 |
| rad37                         | 5.76057e-09 | 1.000000 | 5.76057e-09 | 1.000000 |
| rad30                         | 4.62113e-09 | 1.000000 | 4.62113e-09 | 1.000000 |
| Benzene+cycloprop-2-enylidene | 3.76912e-10 | 1.000000 | 3.76912e-10 | 1.000000 |
| PAH9+H                        | 3.15328e-10 | 1.000000 | 3.15328e-10 | 1.000000 |
| rad38                         | 1.35501e-10 | 1.000000 | 1.35501e-10 | 1.000000 |
| rad60syn                      | 2.13909e-11 | 1.000000 | 2.13909e-11 | 1.000000 |
| rad60anti                     | 1.05039e-11 | 1.000000 | 1.05039e-11 | 1.000000 |
| PAH3+H                        | 9.21902e-12 | 1.000000 | 9.21902e-12 | 1.000000 |
| PAH10+CH3                     | 8.64384e-12 | 1.000000 | 8.64384e-12 | 1.000000 |
| rad46                         | 8.28938e-12 | 1.000000 | 8.28938e-12 | 1.000000 |
| rad59                         | 1.88961e-12 | 1.000000 | 1.88961e-12 | 1.000000 |
| PhcycC3H3_A+H                 | 1.23243e-12 | 1.000000 | 1.23243e-12 | 1.000000 |
| rad43                         | 3.84868e-13 | 1.000000 | 3.84868e-13 | 1.000000 |
| rad54                         | 3.19699e-13 | 1.000000 | 3.19699e-13 | 1.000000 |
| rad62                         | 8.36058e-14 | 1.000000 | 8.36058e-14 | 1.000000 |
| rad50                         | 6.12578e-14 | 1.000000 | 6.12578e-14 | 1.000000 |
| rad70                         | 5.59584e-15 | 1.000000 | 5.59584e-15 | 1.000000 |
| rad55                         | 2.46957e-15 | 1.000000 | 2.46957e-15 | 1.000000 |
| Phenyl+cycC3H4                | 2.14284e-15 | 1.000000 | 0.000000    | 1.000000 |
| PAH1+H                        | 1.24557e-15 | 1.000000 | 1.24557e-15 | 1.000000 |
| rad52                         | 4.22957e-16 | 1.000000 | 4.22957e-16 | 1.000000 |
| rad58                         | 1.41714e-16 | 1.000000 | 1.41714e-16 | 1.000000 |
| rad51                         | 1.14155e-16 | 1.000000 | 1.14155e-16 | 1.000000 |
| rad34                         | 6.62496e-17 | 1.000000 | 6.62496e-17 | 1.000000 |
| PhcycC3H3_B+H                 | 1.04002e-17 | 1.000000 | 1.04002e-17 | 1.000000 |
| rad41                         | 9.07988e-18 | 1.000000 | 9.07988e-18 | 1.000000 |
| rad42                         | 8.13587e-18 | 1.000000 | 8.13587e-18 | 1.000000 |
| rad65                         | 2.36870e-18 | 1.000000 | 2.36870e-18 | 1.000000 |
| Benzene+cycloprop-1-enylidene | 1.90970e-18 | 1.000000 | 1.90970e-18 | 1.000000 |
| rad53                         | 2.02296e-22 | 1.000000 | 2.02296e-22 | 1.000000 |
| rad64                         | 4.24438e-24 | 1.000000 | 4.24438e-24 | 1.000000 |
| rad61                         | 4.05748e-28 | 1.000000 | 4.05748e-28 | 1.000000 |
| rad56                         | 1.28600e-30 | 1.000000 | 1.28600e-30 | 1.000000 |
| rad68syn                      | 2.85402e-32 | 1.000000 | 2.85402e-32 | 1.000000 |
| rad68anti                     | 2.36878e-32 | 1.000000 | 2.36878e-32 | 1.000000 |
| rad26                         | 8.51402e-34 | 1.000000 | 8.51402e-34 | 1.000000 |

|           |             |          |             |          |
|-----------|-------------|----------|-------------|----------|
| rad47     | 7.75924e-34 | 1.000000 | 7.75924e-34 | 1.000000 |
| rad28     | 2.23694e-34 | 1.000000 | 2.23694e-34 | 1.000000 |
| rad6      | 1.75069e-34 | 1.000000 | 1.75069e-34 | 1.000000 |
| rad2      | 3.72733e-36 | 1.000000 | 3.72733e-36 | 1.000000 |
| rad14     | 3.08470e-37 | 1.000000 | 3.08470e-37 | 1.000000 |
| rad19anti | 2.57295e-37 | 1.000000 | 2.57295e-37 | 1.000000 |
| rad1      | 2.38567e-37 | 1.000000 | 2.38567e-37 | 1.000000 |
| rad10     | 1.96078e-37 | 1.000000 | 1.96078e-37 | 1.000000 |
| rad25     | 1.53224e-37 | 1.000000 | 1.53224e-37 | 1.000000 |
| rad3      | 4.95088e-38 | 1.000000 | 4.95088e-38 | 1.000000 |
| rad27     | 3.19403e-38 | 1.000000 | 3.19403e-38 | 1.000000 |
| rad4      | 2.50792e-38 | 1.000000 | 2.50792e-38 | 1.000000 |
| rad7      | 1.27269e-38 | 1.000000 | 1.27269e-38 | 1.000000 |
| rad11     | 3.60960e-39 | 1.000000 | 3.60960e-39 | 1.000000 |
| rad73     | 1.45329e-39 | 1.000000 | 1.45329e-39 | 1.000000 |
| rad9      | 4.54976e-40 | 1.000000 | 4.54976e-40 | 1.000000 |
| rad13     | 7.06467e-41 | 1.000000 | 7.06467e-41 | 1.000000 |
| rad5      | 5.95845e-41 | 1.000000 | 5.95845e-41 | 1.000000 |
| rad31     | 9.34526e-42 | 1.000000 | 9.34526e-42 | 1.000000 |
| rad33     | 1.83327e-42 | 1.000000 | 1.83327e-42 | 1.000000 |
| rad15     | 1.99882e-43 | 1.000000 | 1.99882e-43 | 1.000000 |
| rad20     | 1.36383e-44 | 1.000000 | 1.36383e-44 | 1.000000 |
| rad21     | 1.10835e-44 | 1.000000 | 1.10835e-44 | 1.000000 |
| rad12     | 1.95760e-46 | 1.000000 | 1.95760e-46 | 1.000000 |
| rad18     | 1.31010e-46 | 1.000000 | 1.31010e-46 | 1.000000 |
| rad19syn  | 1.05530e-46 | 1.000000 | 1.05530e-46 | 1.000000 |
| rad40syn  | 5.28600e-48 | 1.000000 | 5.28600e-48 | 1.000000 |
| rad40anti | 4.29340e-48 | 1.000000 | 4.29340e-48 | 1.000000 |
| rad23     | 9.46339e-49 | 1.000000 | 9.46339e-49 | 1.000000 |
| rad22     | 5.63590e-49 | 1.000000 | 5.63590e-49 | 1.000000 |
| rad24     | 2.88490e-50 | 1.000000 | 2.88490e-50 | 1.000000 |
| rad45     | 1.00070e-50 | 1.000000 | 1.00070e-50 | 1.000000 |
| rad36     | 6.12617e-52 | 1.000000 | 6.12617e-52 | 1.000000 |
| PAH8+H    | 4.16081e-52 | 1.000000 | 4.16081e-52 | 1.000000 |
| rad71     | 1.29280e-55 | 1.000000 | 1.29280e-55 | 1.000000 |
| rad8      | 1.61985e-67 | 1.000000 | 1.61985e-67 | 1.000000 |

0.100000000E-07 Pa, 100.000000 K

=====

| Rate constant             | True (fraction)        | Effective (fraction)   |
|---------------------------|------------------------|------------------------|
| Total                     | 1.28255e-15 (1.00 )    | 1.28255e-15 (1.00 )    |
| Formation of rad19        | 1.28255e-15 (1.000 )   | 1.28255e-15 (1.000 )   |
| H-abstraction to cyc2enyl | 4.68359e-24 (3.65e-09) | 4.68359e-24 (3.65e-09) |
| H-abstraction to cyc1enyl | 1.66242e-31 (1.30e-16) | 1.66242e-31 (1.30e-16) |

| species                       | PYtrue      | Cumul    | PYeffective | Cumul    |
|-------------------------------|-------------|----------|-------------|----------|
| Indene+H                      | 0.999735    | 0.999735 | 0.999735    | 0.999735 |
| PhCHCCH2+H                    | 0.000251988 | 0.999987 | 0.000251988 | 0.999987 |
| PhCCH+CH3                     | 4.40736e-06 | 0.999991 | 4.40736e-06 | 0.999991 |
| C2H2+PhCH2                    | 3.22690e-06 | 0.999995 | 3.22690e-06 | 0.999995 |
| PhCCCH3+H                     | 2.51589e-06 | 0.999997 | 2.51589e-06 | 0.999997 |
| Ph+MeAc                       | 1.92987e-06 | 0.999999 | 1.92987e-06 | 0.999999 |
| rad67                         | 5.79181e-07 | 1.000000 | 5.79181e-07 | 1.000000 |
| rad35                         | 2.54382e-07 | 1.000000 | 2.54382e-07 | 1.000000 |
| Ph+Allene                     | 1.79627e-07 | 1.000000 | 1.79627e-07 | 1.000000 |
| PhCH2CCH+H                    | 2.28536e-08 | 1.000000 | 2.28536e-08 | 1.000000 |
| PAH7+H                        | 2.28426e-08 | 1.000000 | 2.28426e-08 | 1.000000 |
| rad39                         | 6.44590e-09 | 1.000000 | 6.44590e-09 | 1.000000 |
| rad37                         | 6.01471e-09 | 1.000000 | 6.01471e-09 | 1.000000 |
| rad30                         | 4.77610e-09 | 1.000000 | 4.77610e-09 | 1.000000 |
| Benzene+cycloprop-2-enylidene | 3.65179e-09 | 1.000000 | 3.65179e-09 | 1.000000 |
| PAH9+H                        | 3.29134e-10 | 1.000000 | 3.29134e-10 | 1.000000 |
| rad38                         | 1.42033e-10 | 1.000000 | 1.42033e-10 | 1.000000 |
| rad60syn                      | 2.24039e-11 | 1.000000 | 2.24039e-11 | 1.000000 |
| rad60anti                     | 1.10144e-11 | 1.000000 | 1.10144e-11 | 1.000000 |
| PAH3+H                        | 9.81802e-12 | 1.000000 | 9.81802e-12 | 1.000000 |
| PAH10+CH3                     | 9.45058e-12 | 1.000000 | 9.45058e-12 | 1.000000 |
| rad46                         | 8.71962e-12 | 1.000000 | 8.71962e-12 | 1.000000 |
| rad59                         | 2.00730e-12 | 1.000000 | 2.00730e-12 | 1.000000 |
| PhcycC3H3_A+H                 | 1.51348e-12 | 1.000000 | 1.51348e-12 | 1.000000 |
| rad43                         | 4.16368e-13 | 1.000000 | 4.16368e-13 | 1.000000 |
| rad54                         | 3.49137e-13 | 1.000000 | 3.49137e-13 | 1.000000 |
| rad62                         | 9.06791e-14 | 1.000000 | 9.06791e-14 | 1.000000 |
| rad50                         | 6.59742e-14 | 1.000000 | 6.59742e-14 | 1.000000 |
| rad70                         | 6.28192e-15 | 1.000000 | 6.28192e-15 | 1.000000 |
| Phenyl+cycC3H4                | 3.36905e-15 | 1.000000 | 0.000000    | 1.000000 |
| rad55                         | 2.77429e-15 | 1.000000 | 2.77429e-15 | 1.000000 |
| PAH1+H                        | 1.46129e-15 | 1.000000 | 1.46129e-15 | 1.000000 |

|                               |             |         |             |         |
|-------------------------------|-------------|---------|-------------|---------|
| rad52                         | 4.63813e-16 | 1.00000 | 4.63813e-16 | 1.00000 |
| rad58                         | 1.61019e-16 | 1.00000 | 1.61019e-16 | 1.00000 |
| Benzene+cycloprop-1-enylidene | 1.29619e-16 | 1.00000 | 1.29619e-16 | 1.00000 |
| rad51                         | 1.27976e-16 | 1.00000 | 1.27976e-16 | 1.00000 |
| rad34                         | 7.79214e-17 | 1.00000 | 7.79214e-17 | 1.00000 |
| PhcycC3H3_B+H                 | 4.09123e-17 | 1.00000 | 4.09123e-17 | 1.00000 |
| rad41                         | 1.13186e-17 | 1.00000 | 1.13186e-17 | 1.00000 |
| rad42                         | 9.88346e-18 | 1.00000 | 9.88346e-18 | 1.00000 |
| rad65                         | 2.68465e-18 | 1.00000 | 2.68465e-18 | 1.00000 |
| rad53                         | 7.24662e-22 | 1.00000 | 7.24662e-22 | 1.00000 |
| rad64                         | 2.36968e-23 | 1.00000 | 2.36968e-23 | 1.00000 |
| rad61                         | 9.04334e-27 | 1.00000 | 9.04334e-27 | 1.00000 |
| rad56                         | 5.01134e-29 | 1.00000 | 5.01134e-29 | 1.00000 |
| rad68syn                      | 1.54810e-30 | 1.00000 | 1.54810e-30 | 1.00000 |
| rad68anti                     | 1.27120e-30 | 1.00000 | 1.27120e-30 | 1.00000 |
| rad26                         | 7.47320e-34 | 1.00000 | 7.47320e-34 | 1.00000 |
| rad47                         | 7.18611e-34 | 1.00000 | 7.18611e-34 | 1.00000 |
| rad28                         | 1.94263e-34 | 1.00000 | 1.94263e-34 | 1.00000 |
| rad6                          | 1.43632e-34 | 1.00000 | 1.43632e-34 | 1.00000 |
| rad2                          | 5.25432e-36 | 1.00000 | 5.25432e-36 | 1.00000 |
| rad40syn                      | 1.99128e-36 | 1.00000 | 1.99128e-36 | 1.00000 |
| rad40anti                     | 1.51571e-36 | 1.00000 | 1.51571e-36 | 1.00000 |
| rad73                         | 7.52968e-37 | 1.00000 | 7.52968e-37 | 1.00000 |
| rad19anti                     | 4.30712e-37 | 1.00000 | 4.30712e-37 | 1.00000 |
| rad1                          | 3.37387e-37 | 1.00000 | 3.37387e-37 | 1.00000 |
| rad14                         | 2.84666e-37 | 1.00000 | 2.84666e-37 | 1.00000 |
| rad10                         | 2.34186e-37 | 1.00000 | 2.34186e-37 | 1.00000 |
| rad25                         | 1.43549e-37 | 1.00000 | 1.43549e-37 | 1.00000 |
| rad3                          | 7.49289e-38 | 1.00000 | 7.49289e-38 | 1.00000 |
| rad4                          | 3.79857e-38 | 1.00000 | 3.79857e-38 | 1.00000 |
| rad27                         | 3.01292e-38 | 1.00000 | 3.01292e-38 | 1.00000 |
| rad7                          | 1.04587e-38 | 1.00000 | 1.04587e-38 | 1.00000 |
| rad11                         | 3.03052e-39 | 1.00000 | 3.03052e-39 | 1.00000 |
| rad9                          | 5.13556e-40 | 1.00000 | 5.13556e-40 | 1.00000 |
| rad13                         | 5.81259e-41 | 1.00000 | 5.81259e-41 | 1.00000 |
| rad5                          | 5.29619e-41 | 1.00000 | 5.29619e-41 | 1.00000 |
| rad31                         | 1.36778e-41 | 1.00000 | 1.36778e-41 | 1.00000 |
| rad33                         | 1.83430e-42 | 1.00000 | 1.83430e-42 | 1.00000 |
| rad15                         | 2.25575e-43 | 1.00000 | 2.25575e-43 | 1.00000 |
| rad20                         | 1.42773e-44 | 1.00000 | 1.42773e-44 | 1.00000 |
| rad21                         | 1.16743e-44 | 1.00000 | 1.16743e-44 | 1.00000 |
| rad12                         | 2.43022e-46 | 1.00000 | 2.43022e-46 | 1.00000 |
| rad19syn                      | 2.08907e-46 | 1.00000 | 2.08907e-46 | 1.00000 |
| rad18                         | 1.28547e-46 | 1.00000 | 1.28547e-46 | 1.00000 |
| rad23                         | 1.27712e-48 | 1.00000 | 1.27712e-48 | 1.00000 |
| rad22                         | 5.31898e-49 | 1.00000 | 5.31898e-49 | 1.00000 |
| PAH8+H                        | 2.22239e-49 | 1.00000 | 2.22239e-49 | 1.00000 |
| rad24                         | 3.36885e-50 | 1.00000 | 3.36885e-50 | 1.00000 |
| rad45                         | 1.87099e-50 | 1.00000 | 1.87099e-50 | 1.00000 |
| rad36                         | 1.14556e-51 | 1.00000 | 1.14556e-51 | 1.00000 |
| rad71                         | 8.99607e-53 | 1.00000 | 8.99607e-53 | 1.00000 |
| rad8                          | 2.12436e-67 | 1.00000 | 2.12436e-67 | 1.00000 |

0.100000000E-07 Pa, 110.000000 K

| Rate constant             | True (fraction)        | Effective (fraction)   |
|---------------------------|------------------------|------------------------|
| Total                     | 1.95524e-15 (1.00)     | 1.95524e-15 (1.00)     |
| Formation of rad19        | 1.95524e-15 (1.000)    | 1.95524e-15 (1.000)    |
| H-abstraction to cyc2enyl | 4.50936e-23 (2.31e-08) | 4.50936e-23 (2.31e-08) |
| H-abstraction to cyc1enyl | 7.87782e-30 (4.03e-15) | 7.87782e-30 (4.03e-15) |

| species                       | PYtrue      | Cumul    | PYeffective | Cumul    |
|-------------------------------|-------------|----------|-------------|----------|
| Indene+H                      | 0.999728    | 0.999728 | 0.999728    | 0.999728 |
| PhCHCCH2+H                    | 0.000258470 | 0.999986 | 0.000258470 | 0.999986 |
| PhCCH+CH3                     | 4.52973e-06 | 0.999991 | 4.52973e-06 | 0.999991 |
| C2H2+PhCH2                    | 3.33534e-06 | 0.999994 | 3.33534e-06 | 0.999994 |
| PhCCCH3+H                     | 2.59304e-06 | 0.999997 | 2.59304e-06 | 0.999997 |
| Ph+MeAc                       | 2.00241e-06 | 0.999999 | 2.00241e-06 | 0.999999 |
| rad67                         | 5.99841e-07 | 1.000000 | 5.99841e-07 | 1.000000 |
| rad35                         | 2.63077e-07 | 1.000000 | 2.63077e-07 | 1.000000 |
| Ph+Allene                     | 1.88813e-07 | 1.000000 | 1.88813e-07 | 1.000000 |
| PhCH2CCH+H                    | 2.42192e-08 | 1.000000 | 2.42192e-08 | 1.000000 |
| PAH7+H                        | 2.38371e-08 | 1.000000 | 2.38371e-08 | 1.000000 |
| Benzene+cycloprop-2-enylidene | 2.30629e-08 | 1.000000 | 2.30629e-08 | 1.000000 |
| rad39                         | 6.72692e-09 | 1.000000 | 6.72692e-09 | 1.000000 |
| rad37                         | 6.29278e-09 | 1.000000 | 6.29278e-09 | 1.000000 |
| rad30                         | 4.94382e-09 | 1.000000 | 4.94382e-09 | 1.000000 |
| PAH9+H                        | 3.44262e-10 | 1.000000 | 3.44262e-10 | 1.000000 |

|                               |             |         |             |         |
|-------------------------------|-------------|---------|-------------|---------|
| rad38                         | 1.49234e-10 | 1.00000 | 1.49234e-10 | 1.00000 |
| rad60syn                      | 2.35177e-11 | 1.00000 | 2.35177e-11 | 1.00000 |
| rad60anti                     | 1.15765e-11 | 1.00000 | 1.15765e-11 | 1.00000 |
| PAH3+H                        | 1.04898e-11 | 1.00000 | 1.04898e-11 | 1.00000 |
| PAH10+CH3                     | 1.03809e-11 | 1.00000 | 1.03809e-11 | 1.00000 |
| rad46                         | 9.19554e-12 | 1.00000 | 9.19554e-12 | 1.00000 |
| rad59                         | 2.13885e-12 | 1.00000 | 2.13885e-12 | 1.00000 |
| PhcycC3H3_A+H                 | 1.87147e-12 | 1.00000 | 1.87147e-12 | 1.00000 |
| rad43                         | 4.52200e-13 | 1.00000 | 4.52200e-13 | 1.00000 |
| rad54                         | 3.83059e-13 | 1.00000 | 3.83059e-13 | 1.00000 |
| rad62                         | 9.87359e-14 | 1.00000 | 9.87359e-14 | 1.00000 |
| rad50                         | 7.13397e-14 | 1.00000 | 7.13397e-14 | 1.00000 |
| rad70                         | 7.09592e-15 | 1.00000 | 7.09592e-15 | 1.00000 |
| Phenyl+cycC3H4                | 5.18630e-15 | 1.00000 | 0.00000     | 1.00000 |
| Benzene+cycloprop-1-enylidene | 4.02908e-15 | 1.00000 | 4.02908e-15 | 1.00000 |
| rad55                         | 3.13590e-15 | 1.00000 | 3.13590e-15 | 1.00000 |
| PAH1+H                        | 1.72857e-15 | 1.00000 | 1.72857e-15 | 1.00000 |
| rad52                         | 5.11263e-16 | 1.00000 | 5.11263e-16 | 1.00000 |
| rad58                         | 1.84232e-16 | 1.00000 | 1.84232e-16 | 1.00000 |
| rad51                         | 1.44427e-16 | 1.00000 | 1.44427e-16 | 1.00000 |
| PhcycC3H3_B+H                 | 1.30407e-16 | 1.00000 | 1.30407e-16 | 1.00000 |
| rad34                         | 9.24233e-17 | 1.00000 | 9.24233e-17 | 1.00000 |
| rad41                         | 1.42061e-17 | 1.00000 | 1.42061e-17 | 1.00000 |
| rad42                         | 1.20969e-17 | 1.00000 | 1.20969e-17 | 1.00000 |
| rad65                         | 3.06485e-18 | 1.00000 | 3.06485e-18 | 1.00000 |
| rad53                         | 2.11093e-21 | 1.00000 | 2.11093e-21 | 1.00000 |
| rad64                         | 9.96387e-23 | 1.00000 | 9.96387e-23 | 1.00000 |
| rad61                         | 1.15972e-25 | 1.00000 | 1.15972e-25 | 1.00000 |
| rad56                         | 1.00969e-27 | 1.00000 | 1.00969e-27 | 1.00000 |
| rad68syn                      | 4.04803e-29 | 1.00000 | 4.04803e-29 | 1.00000 |
| rad68anti                     | 3.29762e-29 | 1.00000 | 3.29762e-29 | 1.00000 |
| rad47                         | 6.77037e-34 | 1.00000 | 6.77037e-34 | 1.00000 |
| rad26                         | 6.65234e-34 | 1.00000 | 6.65234e-34 | 1.00000 |
| rad40syn                      | 3.23201e-34 | 1.00000 | 3.23201e-34 | 1.00000 |
| rad40anti                     | 2.54378e-34 | 1.00000 | 2.54378e-34 | 1.00000 |
| rad28                         | 1.71192e-34 | 1.00000 | 1.71192e-34 | 1.00000 |
| rad6                          | 1.21080e-34 | 1.00000 | 1.21080e-34 | 1.00000 |
| rad73                         | 5.48405e-35 | 1.00000 | 5.48405e-35 | 1.00000 |
| rad2                          | 5.21612e-36 | 1.00000 | 5.21612e-36 | 1.00000 |
| rad19anti                     | 7.70499e-37 | 1.00000 | 7.70499e-37 | 1.00000 |
| rad1                          | 3.36123e-37 | 1.00000 | 3.36123e-37 | 1.00000 |
| rad10                         | 2.75283e-37 | 1.00000 | 2.75283e-37 | 1.00000 |
| rad14                         | 2.67075e-37 | 1.00000 | 2.67075e-37 | 1.00000 |
| rad25                         | 1.36790e-37 | 1.00000 | 1.36790e-37 | 1.00000 |
| rad3                          | 7.22446e-38 | 1.00000 | 7.22446e-38 | 1.00000 |
| rad4                          | 3.66568e-38 | 1.00000 | 3.66568e-38 | 1.00000 |
| rad27                         | 2.89248e-38 | 1.00000 | 2.89248e-38 | 1.00000 |
| rad7                          | 8.83185e-39 | 1.00000 | 8.83185e-39 | 1.00000 |
| rad11                         | 2.61731e-39 | 1.00000 | 2.61731e-39 | 1.00000 |
| rad9                          | 5.98499e-40 | 1.00000 | 5.98499e-40 | 1.00000 |
| rad13                         | 4.91493e-41 | 1.00000 | 4.91493e-41 | 1.00000 |
| rad5                          | 4.78388e-41 | 1.00000 | 4.78388e-41 | 1.00000 |
| rad31                         | 2.11317e-41 | 1.00000 | 2.11317e-41 | 1.00000 |
| rad33                         | 1.87999e-42 | 1.00000 | 1.87999e-42 | 1.00000 |
| rad15                         | 2.62877e-43 | 1.00000 | 2.62877e-43 | 1.00000 |
| rad20                         | 1.52913e-44 | 1.00000 | 1.52913e-44 | 1.00000 |
| rad21                         | 1.25859e-44 | 1.00000 | 1.25859e-44 | 1.00000 |
| rad19syn                      | 4.31564e-46 | 1.00000 | 4.31564e-46 | 1.00000 |
| rad12                         | 3.12268e-46 | 1.00000 | 3.12268e-46 | 1.00000 |
| rad18                         | 1.28491e-46 | 1.00000 | 1.28491e-46 | 1.00000 |
| PAH8+H                        | 1.08851e-46 | 1.00000 | 1.08851e-46 | 1.00000 |
| rad23                         | 1.90217e-48 | 1.00000 | 1.90217e-48 | 1.00000 |
| rad22                         | 5.10201e-49 | 1.00000 | 5.10201e-49 | 1.00000 |
| rad71                         | 5.50109e-50 | 1.00000 | 5.50109e-50 | 1.00000 |
| rad24                         | 4.05118e-50 | 1.00000 | 4.05118e-50 | 1.00000 |
| rad45                         | 2.75616e-50 | 1.00000 | 2.75616e-50 | 1.00000 |
| rad36                         | 1.68796e-51 | 1.00000 | 1.68796e-51 | 1.00000 |
| rad8                          | 2.88050e-67 | 1.00000 | 2.88050e-67 | 1.00000 |

0.100000000E-07 Pa, 120.000000 K

| Rate constant             | True (fraction)        | Effective (fraction)   |
|---------------------------|------------------------|------------------------|
| Total                     | 2.79817e-15 (1.00 )    | 2.79817e-15 (1.00 )    |
| Formation of rad19        | 2.79817e-15 (1.000 )   | 2.79817e-15 (1.000 )   |
| H-abstraction to cyc2enyl | 2.96039e-22 (1.06e-07) | 2.96039e-22 (1.06e-07) |
| H-abstraction to cyclenyl | 1.95323e-28 (6.98e-14) | 1.95323e-28 (6.98e-14) |

| species | PYtrue | Cumul | PYeffective | Cumul |
|---------|--------|-------|-------------|-------|
| -----   |        |       |             |       |

|                               |             |          |             |          |
|-------------------------------|-------------|----------|-------------|----------|
| Indene+H                      | 0.999721    | 0.999721 | 0.999721    | 0.999721 |
| PhCHCCH2+H                    | 0.000265418 | 0.999986 | 0.000265418 | 0.999986 |
| PhCCH+CH3                     | 4.66083e-06 | 0.999991 | 4.66083e-06 | 0.999991 |
| C2H2+PhCH2                    | 3.45258e-06 | 0.999994 | 3.45258e-06 | 0.999994 |
| PhCCCH3+H                     | 2.67609e-06 | 0.999997 | 2.67609e-06 | 0.999997 |
| Ph+MeAc                       | 2.08110e-06 | 0.999999 | 2.08110e-06 | 0.999999 |
| rad67                         | 6.22225e-07 | 1.000000 | 6.22225e-07 | 1.000000 |
| rad35                         | 2.72481e-07 | 1.000000 | 2.72481e-07 | 1.000000 |
| Ph+Allene                     | 1.98950e-07 | 1.000000 | 1.98950e-07 | 1.000000 |
| Benzene+cycloprop-2-enylidene | 1.05797e-07 | 1.000000 | 1.05797e-07 | 1.000000 |
| PhCH2CCH+H                    | 2.57407e-08 | 1.000000 | 2.57407e-08 | 1.000000 |
| PAH7+H                        | 2.49248e-08 | 1.000000 | 2.49248e-08 | 1.000000 |
| rad39                         | 7.03420e-09 | 1.000000 | 7.03420e-09 | 1.000000 |
| rad37                         | 6.59774e-09 | 1.000000 | 6.59774e-09 | 1.000000 |
| rad30                         | 5.12566e-09 | 1.000000 | 5.12566e-09 | 1.000000 |
| PAH9+H                        | 3.60882e-10 | 1.000000 | 3.60882e-10 | 1.000000 |
| rad38                         | 1.57196e-10 | 1.000000 | 1.57196e-10 | 1.000000 |
| rad60syn                      | 2.47458e-11 | 1.000000 | 2.47458e-11 | 1.000000 |
| rad60anti                     | 1.21972e-11 | 1.000000 | 1.21972e-11 | 1.000000 |
| PAH10+CH3                     | 1.14592e-11 | 1.000000 | 1.14592e-11 | 1.000000 |
| PAH3+H                        | 1.12460e-11 | 1.000000 | 1.12460e-11 | 1.000000 |
| rad46                         | 9.72362e-12 | 1.000000 | 9.72362e-12 | 1.000000 |
| PhcycC3H3_A+H                 | 2.33055e-12 | 1.000000 | 2.33055e-12 | 1.000000 |
| rad59                         | 2.28645e-12 | 1.000000 | 2.28645e-12 | 1.000000 |
| rad43                         | 4.93137e-13 | 1.000000 | 4.93137e-13 | 1.000000 |
| rad54                         | 4.22356e-13 | 1.000000 | 4.22356e-13 | 1.000000 |
| rad62                         | 1.07952e-13 | 1.000000 | 1.07952e-13 | 1.000000 |
| rad50                         | 7.74736e-14 | 1.000000 | 7.74736e-14 | 1.000000 |
| Benzene+cycloprop-1-enylidene | 6.98038e-14 | 1.000000 | 6.98038e-14 | 1.000000 |
| rad70                         | 8.06832e-15 | 1.000000 | 8.06832e-15 | 1.000000 |
| Phenyl+cycC3H4                | 7.86468e-15 | 1.000000 | 0.000000    | 1.000000 |
| rad55                         | 3.56798e-15 | 1.000000 | 3.56798e-15 | 1.000000 |
| PAH1+H                        | 2.06260e-15 | 1.000000 | 2.06260e-15 | 1.000000 |
| rad52                         | 5.66713e-16 | 1.000000 | 5.66713e-16 | 1.000000 |
| PhcycC3H3_B+H                 | 3.56809e-16 | 1.000000 | 3.56809e-16 | 1.000000 |
| rad58                         | 2.12355e-16 | 1.000000 | 2.12355e-16 | 1.000000 |
| rad51                         | 1.64161e-16 | 1.000000 | 1.64161e-16 | 1.000000 |
| rad34                         | 1.10600e-16 | 1.000000 | 1.10600e-16 | 1.000000 |
| rad41                         | 1.79639e-17 | 1.000000 | 1.79639e-17 | 1.000000 |
| rad42                         | 1.49203e-17 | 1.000000 | 1.49203e-17 | 1.000000 |
| rad65                         | 3.52612e-18 | 1.000000 | 3.52612e-18 | 1.000000 |
| rad53                         | 5.31328e-21 | 1.000000 | 5.31328e-21 | 1.000000 |
| rad64                         | 3.40977e-22 | 1.000000 | 3.40977e-22 | 1.000000 |
| rad61                         | 9.89208e-25 | 1.000000 | 9.89208e-25 | 1.000000 |
| rad56                         | 1.24744e-26 | 1.000000 | 1.24744e-26 | 1.000000 |
| rad68syn                      | 6.17070e-28 | 1.000000 | 6.17070e-28 | 1.000000 |
| rad68anti                     | 4.99495e-28 | 1.000000 | 4.99495e-28 | 1.000000 |
| rad40syn                      | 1.64573e-32 | 1.000000 | 1.64573e-32 | 1.000000 |
| rad40anti                     | 1.29414e-32 | 1.000000 | 1.29414e-32 | 1.000000 |
| rad73                         | 1.92333e-33 | 1.000000 | 1.92333e-33 | 1.000000 |
| rad47                         | 6.47610e-34 | 1.000000 | 6.47610e-34 | 1.000000 |
| rad26                         | 5.98924e-34 | 1.000000 | 5.98924e-34 | 1.000000 |
| rad28                         | 1.52640e-34 | 1.000000 | 1.52640e-34 | 1.000000 |
| rad6                          | 1.04466e-34 | 1.000000 | 1.04466e-34 | 1.000000 |
| PAH8+H                        | 4.13571e-35 | 1.000000 | 4.13571e-35 | 1.000000 |
| rad2                          | 6.58029e-36 | 1.000000 | 6.58029e-36 | 1.000000 |
| rad19anti                     | 1.46733e-36 | 1.000000 | 1.46733e-36 | 1.000000 |
| rad1                          | 4.25674e-37 | 1.000000 | 4.25674e-37 | 1.000000 |
| rad10                         | 3.52643e-37 | 1.000000 | 3.52643e-37 | 1.000000 |
| rad14                         | 2.54052e-37 | 1.000000 | 2.54052e-37 | 1.000000 |
| rad25                         | 1.32220e-37 | 1.000000 | 1.32220e-37 | 1.000000 |
| rad3                          | 8.56947e-38 | 1.000000 | 8.56947e-38 | 1.000000 |
| rad4                          | 4.35238e-38 | 1.000000 | 4.35238e-38 | 1.000000 |
| rad27                         | 2.81824e-38 | 1.000000 | 2.81824e-38 | 1.000000 |
| rad71                         | 1.32207e-38 | 1.000000 | 1.32207e-38 | 1.000000 |
| rad7                          | 7.63371e-39 | 1.000000 | 7.63371e-39 | 1.000000 |
| rad11                         | 2.31585e-39 | 1.000000 | 2.31585e-39 | 1.000000 |
| rad9                          | 7.17343e-40 | 1.000000 | 7.17343e-40 | 1.000000 |
| rad5                          | 4.37733e-41 | 1.000000 | 4.37733e-41 | 1.000000 |
| rad13                         | 4.25434e-41 | 1.000000 | 4.25434e-41 | 1.000000 |
| rad31                         | 3.43447e-41 | 1.000000 | 3.43447e-41 | 1.000000 |
| rad33                         | 1.96660e-42 | 1.000000 | 1.96660e-42 | 1.000000 |
| rad15                         | 3.15120e-43 | 1.000000 | 3.15120e-43 | 1.000000 |
| rad20                         | 1.67038e-44 | 1.000000 | 1.67038e-44 | 1.000000 |
| rad21                         | 1.38449e-44 | 1.000000 | 1.38449e-44 | 1.000000 |
| rad19syn                      | 9.31466e-46 | 1.000000 | 9.31466e-46 | 1.000000 |
| rad12                         | 4.13897e-46 | 1.000000 | 4.13897e-46 | 1.000000 |
| rad18                         | 1.30443e-46 | 1.000000 | 1.30443e-46 | 1.000000 |
| rad23                         | 3.11567e-48 | 1.000000 | 3.11567e-48 | 1.000000 |
| rad22                         | 4.95927e-49 | 1.000000 | 4.95927e-49 | 1.000000 |

|       |             |         |             |         |
|-------|-------------|---------|-------------|---------|
| rad24 | 5.00044e-50 | 1.00000 | 5.00044e-50 | 1.00000 |
| rad45 | 4.53235e-50 | 1.00000 | 4.53235e-50 | 1.00000 |
| rad36 | 2.77715e-51 | 1.00000 | 2.77715e-51 | 1.00000 |
| rad8  | 4.02249e-67 | 1.00000 | 4.02249e-67 | 1.00000 |

0.100000000E-07 Pa, 130.000000 K

=====

| Rate constant             | True (fraction)        | Effective (fraction)   |
|---------------------------|------------------------|------------------------|
| Total                     | 3.81236e-15 (1.00 )    | 3.81236e-15 (1.00 )    |
| Formation of rad19        | 3.81236e-15 (1.000 )   | 3.81236e-15 (1.000 )   |
| H-abstraction to cyc2enyl | 1.44825e-21 (3.80e-07) | 1.44825e-21 (3.80e-07) |
| H-abstraction to cyclenyl | 2.94348e-27 (7.72e-13) | 2.94348e-27 (7.72e-13) |

| species                       | PYtrue      | Cumul     | PYeffective | Cumul     |
|-------------------------------|-------------|-----------|-------------|-----------|
| Indene+H                      | 0.9999713   | 0.9999713 | 0.9999713   | 0.9999713 |
| PhCHCCH2+H                    | 0.000272881 | 0.999986  | 0.000272881 | 0.999986  |
| PhCCH+CH3                     | 4.80155e-06 | 0.999990  | 4.80155e-06 | 0.999990  |
| C2H2+PhCH2                    | 3.57965e-06 | 0.999994  | 3.57965e-06 | 0.999994  |
| PhCCCH3+H                     | 2.76568e-06 | 0.999997  | 2.76568e-06 | 0.999997  |
| Ph+MeAc                       | 2.16669e-06 | 0.999999  | 2.16669e-06 | 0.999999  |
| rad67                         | 6.46538e-07 | 0.999999  | 6.46538e-07 | 0.999999  |
| Benzene+cycloprop-2-enylidene | 3.79882e-07 | 1.000000  | 3.79882e-07 | 1.000000  |
| rad35                         | 2.82679e-07 | 1.000000  | 2.82679e-07 | 1.000000  |
| Ph+Allene                     | 2.10177e-07 | 1.000000  | 2.10177e-07 | 1.000000  |
| PhCH2CCH+H                    | 2.74426e-08 | 1.000000  | 2.74426e-08 | 1.000000  |
| PAH7+H                        | 2.61181e-08 | 1.000000  | 2.61181e-08 | 1.000000  |
| rad39                         | 7.37119e-09 | 1.000000  | 7.37119e-09 | 1.000000  |
| rad37                         | 6.93326e-09 | 1.000000  | 6.93326e-09 | 1.000000  |
| rad30                         | 5.32333e-09 | 1.000000  | 5.32333e-09 | 1.000000  |
| PAH9+H                        | 3.79203e-10 | 1.000000  | 3.79203e-10 | 1.000000  |
| rad38                         | 1.66034e-10 | 1.000000  | 1.66034e-10 | 1.000000  |
| rad60syn                      | 2.61047e-11 | 1.000000  | 2.61047e-11 | 1.000000  |
| rad60anti                     | 1.28850e-11 | 1.000000  | 1.28850e-11 | 1.000000  |
| PAH10+CH3                     | 1.27171e-11 | 1.000000  | 1.27171e-11 | 1.000000  |
| PAH3+H                        | 1.21014e-11 | 1.000000  | 1.21014e-11 | 1.000000  |
| rad46                         | 1.03119e-11 | 1.000000  | 1.03119e-11 | 1.000000  |
| PhcycC3H3_A+H                 | 2.92361e-12 | 1.000000  | 2.92361e-12 | 1.000000  |
| rad59                         | 2.45281e-12 | 1.000000  | 2.45281e-12 | 1.000000  |
| Benzene+cycloprop-1-enylidene | 7.72089e-13 | 1.000000  | 7.72089e-13 | 1.000000  |
| rad43                         | 5.40149e-13 | 1.000000  | 5.40149e-13 | 1.000000  |
| rad54                         | 4.68163e-13 | 1.000000  | 4.68163e-13 | 1.000000  |
| rad62                         | 1.18546e-13 | 1.000000  | 1.18546e-13 | 1.000000  |
| rad50                         | 8.45270e-14 | 1.000000  | 8.45270e-14 | 1.000000  |
| Phenyl+cycC3H4                | 1.18041e-14 | 1.000000  | 0.000000    | 1.000000  |
| rad70                         | 9.23899e-15 | 1.000000  | 9.23899e-15 | 1.000000  |
| rad55                         | 4.08826e-15 | 1.000000  | 4.08826e-15 | 1.000000  |
| PAH1+H                        | 2.48400e-15 | 1.000000  | 2.48400e-15 | 1.000000  |
| PhcycC3H3_B+H                 | 8.71416e-16 | 1.000000  | 8.71416e-16 | 1.000000  |
| rad52                         | 6.31981e-16 | 1.000000  | 6.31981e-16 | 1.000000  |
| rad58                         | 2.46721e-16 | 1.000000  | 2.46721e-16 | 1.000000  |
| rad51                         | 1.88040e-16 | 1.000000  | 1.88040e-16 | 1.000000  |
| rad34                         | 1.33600e-16 | 1.000000  | 1.33600e-16 | 1.000000  |
| rad41                         | 2.28987e-17 | 1.000000  | 2.28987e-17 | 1.000000  |
| rad42                         | 1.85493e-17 | 1.000000  | 1.85493e-17 | 1.000000  |
| rad65                         | 4.09095e-18 | 1.000000  | 4.09095e-18 | 1.000000  |
| rad53                         | 1.20428e-20 | 1.000000  | 1.20428e-20 | 1.000000  |
| rad64                         | 1.00149e-21 | 1.000000  | 1.00149e-21 | 1.000000  |
| rad61                         | 6.20139e-24 | 1.000000  | 6.20139e-24 | 1.000000  |
| rad56                         | 1.06325e-25 | 1.000000  | 1.06325e-25 | 1.000000  |
| rad68syn                      | 6.24507e-27 | 1.000000  | 6.24507e-27 | 1.000000  |
| rad68anti                     | 5.02761e-27 | 1.000000  | 5.02761e-27 | 1.000000  |
| rad40syn                      | 4.43601e-31 | 1.000000  | 4.43601e-31 | 1.000000  |
| rad40anti                     | 3.49255e-31 | 1.000000  | 3.49255e-31 | 1.000000  |
| rad73                         | 3.97404e-32 | 1.000000  | 3.97404e-32 | 1.000000  |
| PAH8+H                        | 2.25812e-33 | 1.000000  | 2.25812e-33 | 1.000000  |
| rad47                         | 6.28095e-34 | 1.000000  | 6.28095e-34 | 1.000000  |
| rad26                         | 5.44281e-34 | 1.000000  | 5.44281e-34 | 1.000000  |
| rad28                         | 1.37405e-34 | 1.000000  | 1.37405e-34 | 1.000000  |
| rad6                          | 9.20749e-35 | 1.000000  | 9.20749e-35 | 1.000000  |
| rad2                          | 8.56316e-36 | 1.000000  | 8.56316e-36 | 1.000000  |
| rad19anti                     | 2.96678e-36 | 1.000000  | 2.96678e-36 | 1.000000  |
| rad71                         | 1.12266e-36 | 1.000000  | 1.12266e-36 | 1.000000  |
| rad1                          | 5.56273e-37 | 1.000000  | 5.56273e-37 | 1.000000  |
| rad10                         | 4.88661e-37 | 1.000000  | 4.88661e-37 | 1.000000  |
| rad14                         | 2.44527e-37 | 1.000000  | 2.44527e-37 | 1.000000  |
| rad3                          | 1.30541e-37 | 1.000000  | 1.30541e-37 | 1.000000  |
| rad25                         | 1.29373e-37 | 1.000000  | 1.29373e-37 | 1.000000  |
| rad4                          | 6.63723e-38 | 1.000000  | 6.63723e-38 | 1.000000  |

|          |             |         |             |         |
|----------|-------------|---------|-------------|---------|
| rad27    | 2.78109e-38 | 1.00000 | 2.78109e-38 | 1.00000 |
| rad7     | 6.74087e-39 | 1.00000 | 6.74087e-39 | 1.00000 |
| rad11    | 2.09464e-39 | 1.00000 | 2.09464e-39 | 1.00000 |
| rad9     | 8.81857e-40 | 1.00000 | 8.81857e-40 | 1.00000 |
| rad31    | 5.85924e-41 | 1.00000 | 5.85924e-41 | 1.00000 |
| rad5     | 4.04786e-41 | 1.00000 | 4.04786e-41 | 1.00000 |
| rad13    | 3.76272e-41 | 1.00000 | 3.76272e-41 | 1.00000 |
| rad33    | 2.09425e-42 | 1.00000 | 2.09425e-42 | 1.00000 |
| rad15    | 3.87516e-43 | 1.00000 | 3.87516e-43 | 1.00000 |
| rad20    | 1.85691e-44 | 1.00000 | 1.85691e-44 | 1.00000 |
| rad21    | 1.55056e-44 | 1.00000 | 1.55056e-44 | 1.00000 |
| rad19syn | 2.10397e-45 | 1.00000 | 2.10397e-45 | 1.00000 |
| rad12    | 5.64590e-46 | 1.00000 | 5.64590e-46 | 1.00000 |
| rad18    | 1.34196e-46 | 1.00000 | 1.34196e-46 | 1.00000 |
| rad23    | 5.57940e-48 | 1.00000 | 5.57940e-48 | 1.00000 |
| rad22    | 4.87422e-49 | 1.00000 | 4.87422e-49 | 1.00000 |
| rad45    | 7.82277e-50 | 1.00000 | 7.82277e-50 | 1.00000 |
| rad24    | 6.32081e-50 | 1.00000 | 6.32081e-50 | 1.00000 |
| rad36    | 4.79681e-51 | 1.00000 | 4.79681e-51 | 1.00000 |
| rad8     | 5.76906e-67 | 1.00000 | 5.76906e-67 | 1.00000 |

0.100000000E-07 Pa, 140.00000 K

| Rate constant             | True (fraction)        | Effective (fraction)   |
|---------------------------|------------------------|------------------------|
| Total                     | 4.99515e-15 (1.00 )    | 4.99515e-15 (1.00 )    |
| Formation of rad19        | 4.99514e-15 (1.000 )   | 4.99514e-15 (1.000 )   |
| H-abstraction to cyc2enyl | 5.62488e-21 (1.13e-06) | 5.62488e-21 (1.13e-06) |
| H-abstraction to cyclenyl | 3.00047e-26 (6.01e-12) | 3.00047e-26 (6.01e-12) |

| species                       | PYtrue      | Cumul    | PYeffective | Cumul    |
|-------------------------------|-------------|----------|-------------|----------|
| Indene+H                      | 0.999703    | 0.999703 | 0.999703    | 0.999703 |
| PhCHCCH2+H                    | 0.000280917 | 0.999984 | 0.000280917 | 0.999984 |
| PhCCH+CH3                     | 4.95294e-06 | 0.999989 | 4.95294e-06 | 0.999989 |
| C2H2+PhCH2                    | 3.71777e-06 | 0.999992 | 3.71777e-06 | 0.999992 |
| PhCCCH3+H                     | 2.86259e-06 | 0.999995 | 2.86259e-06 | 0.999995 |
| Ph+MeAc                       | 2.26007e-06 | 0.999998 | 2.26007e-06 | 0.999998 |
| Benzene+cycloprop-2-enylidene | 1.12607e-06 | 0.999999 | 1.12607e-06 | 0.999999 |
| rad67                         | 6.73023e-07 | 0.999999 | 6.73023e-07 | 0.999999 |
| rad35                         | 2.93770e-07 | 1.000000 | 2.93770e-07 | 1.000000 |
| Ph+Allene                     | 2.22660e-07 | 1.000000 | 2.22660e-07 | 1.000000 |
| PhCH2CCH+H                    | 2.93552e-08 | 1.000000 | 2.93552e-08 | 1.000000 |
| PAH7+H                        | 2.74321e-08 | 1.000000 | 2.74321e-08 | 1.000000 |
| rad39                         | 7.74205e-09 | 1.000000 | 7.74205e-09 | 1.000000 |
| rad37                         | 7.30375e-09 | 1.000000 | 7.30375e-09 | 1.000000 |
| rad30                         | 5.53888e-09 | 1.000000 | 5.53888e-09 | 1.000000 |
| PAH9+H                        | 3.99479e-10 | 1.000000 | 3.99479e-10 | 1.000000 |
| rad38                         | 1.75886e-10 | 1.000000 | 1.75886e-10 | 1.000000 |
| rad60syn                      | 2.76144e-11 | 1.000000 | 2.76144e-11 | 1.000000 |
| PAH10+CH3                     | 1.41941e-11 | 1.000000 | 1.41941e-11 | 1.000000 |
| rad60anti                     | 1.36504e-11 | 1.000000 | 1.36504e-11 | 1.000000 |
| PAH3+H                        | 1.30742e-11 | 1.000000 | 1.30742e-11 | 1.000000 |
| rad46                         | 1.09703e-11 | 1.000000 | 1.09703e-11 | 1.000000 |
| Benzene+cycloprop-1-enylidene | 6.00677e-12 | 1.000000 | 6.00677e-12 | 1.000000 |
| PhcycC3H3_A+H                 | 3.69543e-12 | 1.000000 | 3.69543e-12 | 1.000000 |
| rad59                         | 2.64125e-12 | 1.000000 | 2.64125e-12 | 1.000000 |
| rad43                         | 5.94445e-13 | 1.000000 | 5.94445e-13 | 1.000000 |
| rad54                         | 5.21921e-13 | 1.000000 | 5.21921e-13 | 1.000000 |
| rad62                         | 1.30794e-13 | 1.000000 | 1.30794e-13 | 1.000000 |
| rad50                         | 9.26897e-14 | 1.000000 | 9.26897e-14 | 1.000000 |
| Phenyl+cycC3H4                | 1.75978e-14 | 1.000000 | 0.000000    | 1.000000 |
| rad70                         | 1.06600e-14 | 1.000000 | 1.06600e-14 | 1.000000 |
| rad55                         | 4.71987e-15 | 1.000000 | 4.71987e-15 | 1.000000 |
| PAH1+H                        | 3.02080e-15 | 1.000000 | 3.02080e-15 | 1.000000 |
| PhcycC3H3_B+H                 | 1.95210e-15 | 1.000000 | 1.95210e-15 | 1.000000 |
| rad52                         | 7.09403e-16 | 1.000000 | 7.09403e-16 | 1.000000 |
| rad58                         | 2.89095e-16 | 1.000000 | 2.89095e-16 | 1.000000 |
| rad51                         | 2.17208e-16 | 1.000000 | 2.17208e-16 | 1.000000 |
| rad34                         | 1.62990e-16 | 1.000000 | 1.62990e-16 | 1.000000 |
| rad41                         | 2.94364e-17 | 1.000000 | 2.94364e-17 | 1.000000 |
| rad42                         | 2.32499e-17 | 1.000000 | 2.32499e-17 | 1.000000 |
| rad65                         | 4.78938e-18 | 1.000000 | 4.78938e-18 | 1.000000 |
| rad53                         | 2.52919e-20 | 1.000000 | 2.52919e-20 | 1.000000 |
| rad64                         | 2.62060e-21 | 1.000000 | 2.62060e-21 | 1.000000 |
| rad61                         | 3.06689e-23 | 1.000000 | 3.06689e-23 | 1.000000 |
| rad56                         | 6.80095e-25 | 1.000000 | 6.80095e-25 | 1.000000 |
| rad68syn                      | 4.60298e-26 | 1.000000 | 4.60298e-26 | 1.000000 |
| rad68anti                     | 3.68680e-26 | 1.000000 | 3.68680e-26 | 1.000000 |
| rad40syn                      | 7.53654e-30 | 1.000000 | 7.53654e-30 | 1.000000 |



|           |             |          |             |          |
|-----------|-------------|----------|-------------|----------|
| rad40anti | 5.95184e-30 | 1.000000 | 5.95184e-30 | 1.000000 |
| rad73     | 5.47778e-31 | 1.000000 | 5.47778e-31 | 1.000000 |
| PAH8+H    | 6.68141e-32 | 1.000000 | 6.68141e-32 | 1.000000 |
| rad47     | 6.17129e-34 | 1.000000 | 6.17129e-34 | 1.000000 |
| rad26     | 4.98484e-34 | 1.000000 | 4.98484e-34 | 1.000000 |
| rad28     | 1.24670e-34 | 1.000000 | 1.24670e-34 | 1.000000 |
| rad6      | 8.29178e-35 | 1.000000 | 8.29178e-35 | 1.000000 |
| rad71     | 4.16930e-35 | 1.000000 | 4.16930e-35 | 1.000000 |
| rad2      | 1.63647e-35 | 1.000000 | 1.63647e-35 | 1.000000 |
| rad19anti | 6.35581e-36 | 1.000000 | 6.35581e-36 | 1.000000 |
| rad1      | 1.06795e-36 | 1.000000 | 1.06795e-36 | 1.000000 |
| rad10     | 7.65157e-37 | 1.000000 | 7.65157e-37 | 1.000000 |
| rad3      | 2.53302e-37 | 1.000000 | 2.53302e-37 | 1.000000 |
| rad14     | 2.37779e-37 | 1.000000 | 2.37779e-37 | 1.000000 |
| rad4      | 1.28940e-37 | 1.000000 | 1.28940e-37 | 1.000000 |
| rad25     | 1.27945e-37 | 1.000000 | 1.27945e-37 | 1.000000 |
| rad27     | 2.77528e-38 | 1.000000 | 2.77528e-38 | 1.000000 |
| rad7      | 6.08226e-39 | 1.000000 | 6.08226e-39 | 1.000000 |
| rad11     | 1.93549e-39 | 1.000000 | 1.93549e-39 | 1.000000 |
| rad9      | 1.10979e-39 | 1.000000 | 1.10979e-39 | 1.000000 |
| rad31     | 1.04782e-40 | 1.000000 | 1.04782e-40 | 1.000000 |
| rad5      | 3.77611e-41 | 1.000000 | 3.77611e-41 | 1.000000 |
| rad13     | 3.40097e-41 | 1.000000 | 3.40097e-41 | 1.000000 |
| rad33     | 2.26601e-42 | 1.000000 | 2.26601e-42 | 1.000000 |
| rad15     | 4.87930e-43 | 1.000000 | 4.87930e-43 | 1.000000 |
| rad20     | 2.09728e-44 | 1.000000 | 2.09728e-44 | 1.000000 |
| rad21     | 1.76510e-44 | 1.000000 | 1.76510e-44 | 1.000000 |
| rad19syn  | 4.98180e-45 | 1.000000 | 4.98180e-45 | 1.000000 |
| rad12     | 7.91334e-46 | 1.000000 | 7.91334e-46 | 1.000000 |
| rad18     | 1.39665e-46 | 1.000000 | 1.39665e-46 | 1.000000 |
| rad23     | 1.08846e-47 | 1.000000 | 1.08846e-47 | 1.000000 |
| rad22     | 4.83586e-49 | 1.000000 | 4.83586e-49 | 1.000000 |
| rad45     | 1.81064e-49 | 1.000000 | 1.81064e-49 | 1.000000 |
| rad24     | 8.16914e-50 | 1.000000 | 8.16914e-50 | 1.000000 |
| rad36     | 1.11129e-50 | 1.000000 | 1.11129e-50 | 1.000000 |
| rad8      | 8.48093e-67 | 1.000000 | 8.48093e-67 | 1.000000 |

0.100000000E-07 Pa, 150.000000 K

| Rate constant             | True (fraction)        | Effective (fraction)   |
|---------------------------|------------------------|------------------------|
| Total                     | 6.34137e-15 (1.00 )    | 6.34137e-15 (1.00 )    |
| Formation of rad19        | 6.34135e-15 (1.000 )   | 6.34135e-15 (1.000 )   |
| H-abstraction to cyc2enyl | 1.81685e-20 (2.87e-06) | 1.81685e-20 (2.87e-06) |
| H-abstraction to cyc1enyl | 2.23765e-25 (3.53e-11) | 2.23765e-25 (3.53e-11) |

| species                       | PYtrue      | Cumul    | PYeffective | Cumul    |
|-------------------------------|-------------|----------|-------------|----------|
| Indene+H                      | 0.999692    | 0.999692 | 0.999692    | 0.999692 |
| PhCHCCH2+H                    | 0.000289592 | 0.999982 | 0.000289592 | 0.999982 |
| PhCCH+CH3                     | 5.11623e-06 | 0.999987 | 5.11623e-06 | 0.999987 |
| C2H2+PhCH2                    | 3.86834e-06 | 0.999991 | 3.86834e-06 | 0.999991 |
| PhCCCH3+H                     | 2.96768e-06 | 0.999994 | 2.96768e-06 | 0.999994 |
| Benzene+cycloprop-2-enylidene | 2.86508e-06 | 0.999997 | 2.86508e-06 | 0.999997 |
| Ph+MeAc                       | 2.36224e-06 | 0.999999 | 2.36224e-06 | 0.999999 |
| rad67                         | 7.01968e-07 | 1.000000 | 7.01968e-07 | 1.000000 |
| rad35                         | 3.05869e-07 | 1.000000 | 3.05869e-07 | 1.000000 |
| Ph+Allene                     | 2.36598e-07 | 1.000000 | 2.36598e-07 | 1.000000 |
| PhCH2CCH+H                    | 3.15146e-08 | 1.000000 | 3.15146e-08 | 1.000000 |
| PAH7+H                        | 2.88839e-08 | 1.000000 | 2.88839e-08 | 1.000000 |
| rad39                         | 8.15167e-09 | 1.000000 | 8.15167e-09 | 1.000000 |
| rad37                         | 7.71444e-09 | 1.000000 | 7.71444e-09 | 1.000000 |
| rad30                         | 5.77470e-09 | 1.000000 | 5.77470e-09 | 1.000000 |
| PAH9+H                        | 4.22009e-10 | 1.000000 | 4.22009e-10 | 1.000000 |
| rad38                         | 1.86919e-10 | 1.000000 | 1.86919e-10 | 1.000000 |
| Benzene+cycloprop-1-enylidene | 3.52865e-11 | 1.000000 | 3.52865e-11 | 1.000000 |
| rad60syn                      | 2.92988e-11 | 1.000000 | 2.92988e-11 | 1.000000 |
| PAH10+CH3                     | 1.59406e-11 | 1.000000 | 1.59406e-11 | 1.000000 |
| rad60anti                     | 1.45059e-11 | 1.000000 | 1.45059e-11 | 1.000000 |
| PAH3+H                        | 1.41866e-11 | 1.000000 | 1.41866e-11 | 1.000000 |
| rad46                         | 1.17105e-11 | 1.000000 | 1.17105e-11 | 1.000000 |
| PhcycC3H3_A+H                 | 4.70694e-12 | 1.000000 | 4.70694e-12 | 1.000000 |
| rad59                         | 2.85583e-12 | 1.000000 | 2.85583e-12 | 1.000000 |
| rad43                         | 6.57518e-13 | 1.000000 | 6.57518e-13 | 1.000000 |
| rad54                         | 5.85445e-13 | 1.000000 | 5.85445e-13 | 1.000000 |
| rad62                         | 1.45031e-13 | 1.000000 | 1.45031e-13 | 1.000000 |
| rad50                         | 1.02199e-13 | 1.000000 | 1.02199e-13 | 1.000000 |
| Phenyl+cycC3H4                | 2.61242e-14 | 1.000000 | 0.000000    | 1.000000 |
| rad70                         | 1.23994e-14 | 1.000000 | 1.23994e-14 | 1.000000 |
| rad55                         | 5.49294e-15 | 1.000000 | 5.49294e-15 | 1.000000 |

|               |             |         |             |         |
|---------------|-------------|---------|-------------|---------|
| PhcycC3H3_B+H | 4.08980e-15 | 1.00000 | 4.08980e-15 | 1.00000 |
| PAH1+H        | 3.71111e-15 | 1.00000 | 3.71111e-15 | 1.00000 |
| rad52         | 8.01987e-16 | 1.00000 | 8.01987e-16 | 1.00000 |
| rad58         | 3.41821e-16 | 1.00000 | 3.41821e-16 | 1.00000 |
| rad51         | 2.53178e-16 | 1.00000 | 2.53178e-16 | 1.00000 |
| rad34         | 2.00908e-16 | 1.00000 | 2.00908e-16 | 1.00000 |
| rad41         | 3.81683e-17 | 1.00000 | 3.81683e-17 | 1.00000 |
| rad42         | 2.93833e-17 | 1.00000 | 2.93833e-17 | 1.00000 |
| rad65         | 5.66165e-18 | 1.00000 | 5.66165e-18 | 1.00000 |
| rad53         | 5.02100e-20 | 1.00000 | 5.02100e-20 | 1.00000 |
| rad64         | 6.27506e-21 | 1.00000 | 6.27506e-21 | 1.00000 |
| rad61         | 1.25963e-22 | 1.00000 | 1.25963e-22 | 1.00000 |
| rad56         | 3.47179e-24 | 1.00000 | 3.47179e-24 | 1.00000 |
| rad68syn      | 2.64356e-25 | 1.00000 | 2.64356e-25 | 1.00000 |
| rad68anti     | 2.10658e-25 | 1.00000 | 2.10658e-25 | 1.00000 |
| rad40syn      | 8.88016e-29 | 1.00000 | 8.88016e-29 | 1.00000 |
| rad40anti     | 7.03998e-29 | 1.00000 | 7.03998e-29 | 1.00000 |
| rad73         | 5.47735e-30 | 1.00000 | 5.47735e-30 | 1.00000 |
| PAH8+H        | 1.26388e-30 | 1.00000 | 1.26388e-30 | 1.00000 |
| rad71         | 9.41848e-34 | 1.00000 | 9.41848e-34 | 1.00000 |
| rad47         | 6.13964e-34 | 1.00000 | 6.13964e-34 | 1.00000 |
| rad26         | 4.59537e-34 | 1.00000 | 4.59537e-34 | 1.00000 |
| rad28         | 1.13862e-34 | 1.00000 | 1.13862e-34 | 1.00000 |
| rad6          | 7.64845e-35 | 1.00000 | 7.64845e-35 | 1.00000 |
| rad2          | 1.82206e-35 | 1.00000 | 1.82206e-35 | 1.00000 |
| rad19anti     | 1.44031e-35 | 1.00000 | 1.44031e-35 | 1.00000 |
| rad1          | 1.19506e-36 | 1.00000 | 1.19506e-36 | 1.00000 |
| rad10         | 1.02605e-36 | 1.00000 | 1.02605e-36 | 1.00000 |
| rad14         | 2.33312e-37 | 1.00000 | 2.33312e-37 | 1.00000 |
| rad3          | 2.29242e-37 | 1.00000 | 2.29242e-37 | 1.00000 |
| rad25         | 1.27737e-37 | 1.00000 | 1.27737e-37 | 1.00000 |
| rad4          | 1.16847e-37 | 1.00000 | 1.16847e-37 | 1.00000 |
| rad27         | 2.79721e-38 | 1.00000 | 2.79721e-38 | 1.00000 |
| rad7          | 5.62156e-39 | 1.00000 | 5.62156e-39 | 1.00000 |
| rad11         | 1.82901e-39 | 1.00000 | 1.82901e-39 | 1.00000 |
| rad9          | 1.42777e-39 | 1.00000 | 1.42777e-39 | 1.00000 |
| rad31         | 1.96252e-40 | 1.00000 | 1.96252e-40 | 1.00000 |
| rad5          | 3.54852e-41 | 1.00000 | 3.54852e-41 | 1.00000 |
| rad13         | 3.14923e-41 | 1.00000 | 3.14923e-41 | 1.00000 |
| rad33         | 2.48768e-42 | 1.00000 | 2.48768e-42 | 1.00000 |
| rad15         | 6.28180e-43 | 1.00000 | 6.28180e-43 | 1.00000 |
| rad20         | 2.40370e-44 | 1.00000 | 2.40370e-44 | 1.00000 |
| rad21         | 2.03988e-44 | 1.00000 | 2.03988e-44 | 1.00000 |
| rad19syn      | 1.23836e-44 | 1.00000 | 1.23836e-44 | 1.00000 |
| rad12         | 1.13844e-45 | 1.00000 | 1.13844e-45 | 1.00000 |
| rad18         | 1.46856e-46 | 1.00000 | 1.46856e-46 | 1.00000 |
| rad23         | 2.30184e-47 | 1.00000 | 2.30184e-47 | 1.00000 |
| rad22         | 4.83677e-49 | 1.00000 | 4.83677e-49 | 1.00000 |
| rad45         | 3.82944e-49 | 1.00000 | 3.82944e-49 | 1.00000 |
| rad24         | 1.07828e-49 | 1.00000 | 1.07828e-49 | 1.00000 |
| rad36         | 2.35302e-50 | 1.00000 | 2.35302e-50 | 1.00000 |
| rad8          | 1.27613e-66 | 1.00000 | 1.27613e-66 | 1.00000 |

0.100000000E-07 Pa, 160.000000 K

| Rate constant             | True (fraction)        | Effective (fraction)   |
|---------------------------|------------------------|------------------------|
| Total                     | 7.84423e-15 (1.00 )    | 7.84423e-15 (1.00 )    |
| Formation of rad19        | 7.84418e-15 (1.000 )   | 7.84418e-15 (1.000 )   |
| H-abstraction to cyc2enyl | 5.05321e-20 (6.44e-06) | 5.05321e-20 (6.44e-06) |
| H-abstraction to cyc1enyl | 1.29479e-24 (1.65e-10) | 1.29479e-24 (1.65e-10) |

| species                       | PYtrue      | Cumul    | PYeffective | Cumul    |
|-------------------------------|-------------|----------|-------------|----------|
| Indene+H                      | 0.999679    | 0.999679 | 0.999679    | 0.999679 |
| PhCHCCH2+H                    | 0.000298982 | 0.999978 | 0.000298982 | 0.999978 |
| Benzene+cycloprop-2-enylidene | 6.44194e-06 | 0.999984 | 6.44194e-06 | 0.999984 |
| PhCCH+CH3                     | 5.29275e-06 | 0.999989 | 5.29275e-06 | 0.999989 |
| C2H2+PhCH2                    | 4.03297e-06 | 0.999993 | 4.03297e-06 | 0.999993 |
| PhCCCH3+H                     | 3.08198e-06 | 0.999996 | 3.08198e-06 | 0.999996 |
| Ph+MeAc                       | 2.47440e-06 | 0.999999 | 2.47440e-06 | 0.999999 |
| rad67                         | 7.33696e-07 | 1.000000 | 7.33696e-07 | 1.000000 |
| rad35                         | 3.19106e-07 | 1.000000 | 3.19106e-07 | 1.000000 |
| Ph+Allene                     | 2.52226e-07 | 1.000000 | 2.52226e-07 | 1.000000 |
| PhCH2CCH+H                    | 3.39643e-08 | 1.000000 | 3.39643e-08 | 1.000000 |
| PAH7+H                        | 3.04941e-08 | 1.000000 | 3.04941e-08 | 1.000000 |
| rad39                         | 8.60568e-09 | 1.000000 | 8.60568e-09 | 1.000000 |
| rad37                         | 8.17136e-09 | 1.000000 | 8.17136e-09 | 1.000000 |
| rad30                         | 6.03351e-09 | 1.000000 | 6.03351e-09 | 1.000000 |
| PAH9+H                        | 4.47144e-10 | 1.000000 | 4.47144e-10 | 1.000000 |

|                               |             |         |             |         |
|-------------------------------|-------------|---------|-------------|---------|
| rad38                         | 1.99330e-10 | 1.00000 | 1.99330e-10 | 1.00000 |
| Benzene+cycloprop-1-enylidene | 1.65062e-10 | 1.00000 | 1.65062e-10 | 1.00000 |
| rad60syn                      | 3.11859e-11 | 1.00000 | 3.11859e-11 | 1.00000 |
| PAH10+CH3                     | 1.80192e-11 | 1.00000 | 1.80192e-11 | 1.00000 |
| rad60anti                     | 1.54660e-11 | 1.00000 | 1.54660e-11 | 1.00000 |
| PAH3+H                        | 1.54653e-11 | 1.00000 | 1.54653e-11 | 1.00000 |
| rad46                         | 1.25466e-11 | 1.00000 | 1.25466e-11 | 1.00000 |
| PhcycC3H3_A+H                 | 6.04093e-12 | 1.00000 | 6.04093e-12 | 1.00000 |
| rad59                         | 3.10145e-12 | 1.00000 | 3.10145e-12 | 1.00000 |
| rad43                         | 7.31202e-13 | 1.00000 | 7.31202e-13 | 1.00000 |
| rad54                         | 6.61022e-13 | 1.00000 | 6.61022e-13 | 1.00000 |
| rad62                         | 1.61671e-13 | 1.00000 | 1.61671e-13 | 1.00000 |
| rad50                         | 1.13351e-13 | 1.00000 | 1.13351e-13 | 1.00000 |
| Phenyl+cycC3H4                | 3.86829e-14 | 1.00000 | 0.00000     | 1.00000 |
| rad70                         | 1.45456e-14 | 1.00000 | 1.45456e-14 | 1.00000 |
| PhcycC3H3_B+H                 | 8.12740e-15 | 1.00000 | 8.12740e-15 | 1.00000 |
| rad55                         | 6.44670e-15 | 1.00000 | 6.44670e-15 | 1.00000 |
| PAH1+H                        | 4.60690e-15 | 1.00000 | 4.60690e-15 | 1.00000 |
| rad52                         | 9.13581e-16 | 1.00000 | 9.13581e-16 | 1.00000 |
| rad58                         | 4.08006e-16 | 1.00000 | 4.08006e-16 | 1.00000 |
| rad51                         | 2.97957e-16 | 1.00000 | 2.97957e-16 | 1.00000 |
| rad34                         | 2.50279e-16 | 1.00000 | 2.50279e-16 | 1.00000 |
| rad41                         | 4.99159e-17 | 1.00000 | 4.99159e-17 | 1.00000 |
| rad42                         | 3.74399e-17 | 1.00000 | 3.74399e-17 | 1.00000 |
| rad65                         | 6.76165e-18 | 1.00000 | 6.76165e-18 | 1.00000 |
| rad53                         | 9.55513e-20 | 1.00000 | 9.55513e-20 | 1.00000 |
| rad64                         | 1.40204e-20 | 1.00000 | 1.40204e-20 | 1.00000 |
| rad61                         | 4.46330e-22 | 1.00000 | 4.46330e-22 | 1.00000 |
| rad56                         | 1.48090e-23 | 1.00000 | 1.48090e-23 | 1.00000 |
| rad68syn                      | 1.24419e-24 | 1.00000 | 1.24419e-24 | 1.00000 |
| rad68anti                     | 9.86157e-25 | 1.00000 | 9.86157e-25 | 1.00000 |
| rad40syn                      | 7.79816e-28 | 1.00000 | 7.79816e-28 | 1.00000 |
| rad40anti                     | 6.20621e-28 | 1.00000 | 6.20621e-28 | 1.00000 |
| rad73                         | 4.23082e-29 | 1.00000 | 4.23082e-29 | 1.00000 |
| PAH8+H                        | 1.68146e-29 | 1.00000 | 1.68146e-29 | 1.00000 |
| rad71                         | 1.46142e-32 | 1.00000 | 1.46142e-32 | 1.00000 |
| rad47                         | 6.18322e-34 | 1.00000 | 6.18322e-34 | 1.00000 |
| rad26                         | 4.25986e-34 | 1.00000 | 4.25986e-34 | 1.00000 |
| rad28                         | 1.04565e-34 | 1.00000 | 1.04565e-34 | 1.00000 |
| rad6                          | 7.28167e-35 | 1.00000 | 7.28167e-35 | 1.00000 |
| rad2                          | 3.76861e-35 | 1.00000 | 3.76861e-35 | 1.00000 |
| rad19anti                     | 3.44720e-35 | 1.00000 | 3.44720e-35 | 1.00000 |
| rad1                          | 2.48530e-36 | 1.00000 | 2.48530e-36 | 1.00000 |
| rad10                         | 1.67578e-36 | 1.00000 | 1.67578e-36 | 1.00000 |
| rad3                          | 4.87783e-37 | 1.00000 | 4.87783e-37 | 1.00000 |
| rad4                          | 2.48983e-37 | 1.00000 | 2.48983e-37 | 1.00000 |
| rad14                         | 2.30785e-37 | 1.00000 | 2.30785e-37 | 1.00000 |
| rad25                         | 1.28621e-37 | 1.00000 | 1.28621e-37 | 1.00000 |
| rad27                         | 2.84485e-38 | 1.00000 | 2.84485e-38 | 1.00000 |
| rad7                          | 5.36288e-39 | 1.00000 | 5.36288e-39 | 1.00000 |
| rad9                          | 1.87597e-39 | 1.00000 | 1.87597e-39 | 1.00000 |
| rad11                         | 1.77596e-39 | 1.00000 | 1.77596e-39 | 1.00000 |
| rad31                         | 3.84757e-40 | 1.00000 | 3.84757e-40 | 1.00000 |
| rad5                          | 3.35535e-41 | 1.00000 | 3.35535e-41 | 1.00000 |
| rad13                         | 3.01020e-41 | 1.00000 | 3.01020e-41 | 1.00000 |
| rad33                         | 2.76812e-42 | 1.00000 | 2.76812e-42 | 1.00000 |
| rad15                         | 8.26127e-43 | 1.00000 | 8.26127e-43 | 1.00000 |
| rad19syn                      | 3.23538e-44 | 1.00000 | 3.23538e-44 | 1.00000 |
| rad20                         | 2.79296e-44 | 1.00000 | 2.79296e-44 | 1.00000 |
| rad21                         | 2.39115e-44 | 1.00000 | 2.39115e-44 | 1.00000 |
| rad12                         | 1.67991e-45 | 1.00000 | 1.67991e-45 | 1.00000 |
| rad18                         | 1.55846e-46 | 1.00000 | 1.55846e-46 | 1.00000 |
| rad23                         | 5.30106e-47 | 1.00000 | 5.30106e-47 | 1.00000 |
| rad45                         | 1.10555e-48 | 1.00000 | 1.10555e-48 | 1.00000 |
| rad22                         | 4.87204e-49 | 1.00000 | 4.87204e-49 | 1.00000 |
| rad24                         | 1.45244e-49 | 1.00000 | 1.45244e-49 | 1.00000 |
| rad36                         | 6.80318e-50 | 1.00000 | 6.80318e-50 | 1.00000 |
| rad8                          | 1.96346e-66 | 1.00000 | 1.96346e-66 | 1.00000 |

0.100000000E-07 Pa, 170.000000 K

| Rate constant             | True (fraction)        | Effective (fraction)   |
|---------------------------|------------------------|------------------------|
| Total                     | 9.49598e-15 (1.00)     | 9.49598e-15 (1.00)     |
| Formation of rad19        | 9.49586e-15 (1.000)    | 9.49586e-15 (1.000)    |
| H-abstraction to cyc2enyl | 1.24279e-19 (1.31e-05) | 1.24279e-19 (1.31e-05) |
| H-abstraction to cyclenyl | 6.08025e-24 (6.40e-10) | 6.08025e-24 (6.40e-10) |

| species | PYtrue | Cumul | PYeffective | Cumul |
|---------|--------|-------|-------------|-------|
| -----   |        |       |             |       |

|                               |             |          |             |          |
|-------------------------------|-------------|----------|-------------|----------|
| Indene+H                      | 0.999661    | 0.999661 | 0.999661    | 0.999661 |
| PhCHCH2+H                     | 0.000309167 | 0.999970 | 0.000309167 | 0.999970 |
| Benzene+cycloprop-2-enylidene | 1.30875e-05 | 0.999983 | 1.30875e-05 | 0.999983 |
| PhCCH+CH3                     | 5.48398e-06 | 0.999989 | 5.48398e-06 | 0.999989 |
| C2H2+PhCH2                    | 4.21347e-06 | 0.999993 | 4.21347e-06 | 0.999993 |
| PhCCCH3+H                     | 3.20659e-06 | 0.999996 | 3.20659e-06 | 0.999996 |
| Ph+MeAc                       | 2.59788e-06 | 0.999999 | 2.59788e-06 | 0.999999 |
| rad67                         | 7.68575e-07 | 0.999999 | 7.68575e-07 | 0.999999 |
| rad35                         | 3.33631e-07 | 1.000000 | 3.33631e-07 | 1.000000 |
| Ph+Allene                     | 2.69815e-07 | 1.000000 | 2.69815e-07 | 1.000000 |
| PhCH2CCH+H                    | 3.67554e-08 | 1.000000 | 3.67554e-08 | 1.000000 |
| PAH7+H                        | 3.22859e-08 | 1.000000 | 3.22859e-08 | 1.000000 |
| rad39                         | 9.11054e-09 | 1.000000 | 9.11054e-09 | 1.000000 |
| rad37                         | 8.68151e-09 | 1.000000 | 8.68151e-09 | 1.000000 |
| rad30                         | 6.31840e-09 | 1.000000 | 6.31840e-09 | 1.000000 |
| Benzene+cycloprop-1-enylidene | 6.40297e-10 | 1.000000 | 6.40297e-10 | 1.000000 |
| PAH9+H                        | 4.75294e-10 | 1.000000 | 4.75294e-10 | 1.000000 |
| rad38                         | 2.13351e-10 | 1.000000 | 2.13351e-10 | 1.000000 |
| rad60syn                      | 3.33085e-11 | 1.000000 | 3.33085e-11 | 1.000000 |
| PAH10+CH3                     | 2.05094e-11 | 1.000000 | 2.05094e-11 | 1.000000 |
| PAH3+H                        | 1.69431e-11 | 1.000000 | 1.69431e-11 | 1.000000 |
| rad60anti                     | 1.65480e-11 | 1.000000 | 1.65480e-11 | 1.000000 |
| rad46                         | 1.34952e-11 | 1.000000 | 1.34952e-11 | 1.000000 |
| PhcycC3H3_A+H                 | 7.80973e-12 | 1.000000 | 7.80973e-12 | 1.000000 |
| rad59                         | 3.38400e-12 | 1.000000 | 3.38400e-12 | 1.000000 |
| rad43                         | 8.17741e-13 | 1.000000 | 8.17741e-13 | 1.000000 |
| rad54                         | 7.51515e-13 | 1.000000 | 7.51515e-13 | 1.000000 |
| rad62                         | 1.81221e-13 | 1.000000 | 1.81221e-13 | 1.000000 |
| rad50                         | 1.26512e-13 | 1.000000 | 1.26512e-13 | 1.000000 |
| Phenyl+cycC3H4                | 5.71891e-14 | 1.000000 | 0.000000    | 1.000000 |
| rad70                         | 1.72142e-14 | 1.000000 | 1.72142e-14 | 1.000000 |
| PhcycC3H3_B+H                 | 1.54798e-14 | 1.000000 | 1.54798e-14 | 1.000000 |
| rad55                         | 7.63217e-15 | 1.000000 | 7.63217e-15 | 1.000000 |
| PAH1+H                        | 5.77897e-15 | 1.000000 | 5.77897e-15 | 1.000000 |
| rad52                         | 1.04914e-15 | 1.000000 | 1.04914e-15 | 1.000000 |
| rad58                         | 4.91782e-16 | 1.000000 | 4.91782e-16 | 1.000000 |
| rad51                         | 3.54209e-16 | 1.000000 | 3.54209e-16 | 1.000000 |
| rad34                         | 3.15103e-16 | 1.000000 | 3.15103e-16 | 1.000000 |
| rad41                         | 6.58203e-17 | 1.000000 | 6.58203e-17 | 1.000000 |
| rad42                         | 4.80841e-17 | 1.000000 | 4.80841e-17 | 1.000000 |
| rad65                         | 8.16178e-18 | 1.000000 | 8.16178e-18 | 1.000000 |
| rad53                         | 1.76036e-19 | 1.000000 | 1.76036e-19 | 1.000000 |
| rad64                         | 2.96517e-20 | 1.000000 | 2.96517e-20 | 1.000000 |
| rad61                         | 1.40406e-21 | 1.000000 | 1.40406e-21 | 1.000000 |
| rad56                         | 5.46521e-23 | 1.000000 | 5.46521e-23 | 1.000000 |
| rad68syn                      | 4.98617e-24 | 1.000000 | 4.98617e-24 | 1.000000 |
| rad68anti                     | 3.92935e-24 | 1.000000 | 3.92935e-24 | 1.000000 |
| rad40syn                      | 5.38958e-27 | 1.000000 | 5.38958e-27 | 1.000000 |
| rad40anti                     | 4.30388e-27 | 1.000000 | 4.30388e-27 | 1.000000 |
| rad73                         | 2.64778e-28 | 1.000000 | 2.64778e-28 | 1.000000 |
| PAH8+H                        | 1.67789e-28 | 1.000000 | 1.67789e-28 | 1.000000 |
| rad71                         | 1.66935e-31 | 1.000000 | 1.66935e-31 | 1.000000 |
| rad47                         | 6.30329e-34 | 1.000000 | 6.30329e-34 | 1.000000 |
| rad26                         | 3.96758e-34 | 1.000000 | 3.96758e-34 | 1.000000 |
| rad28                         | 9.64754e-35 | 1.000000 | 9.64754e-35 | 1.000000 |
| rad19anti                     | 8.69987e-35 | 1.000000 | 8.69987e-35 | 1.000000 |
| rad6                          | 7.24309e-35 | 1.000000 | 7.24309e-35 | 1.000000 |
| rad2                          | 4.76510e-35 | 1.000000 | 4.76510e-35 | 1.000000 |
| rad1                          | 3.16114e-36 | 1.000000 | 3.16114e-36 | 1.000000 |
| rad10                         | 2.56146e-36 | 1.000000 | 2.56146e-36 | 1.000000 |
| rad3                          | 4.74806e-37 | 1.000000 | 4.74806e-37 | 1.000000 |
| rad4                          | 2.42744e-37 | 1.000000 | 2.42744e-37 | 1.000000 |
| rad14                         | 2.29959e-37 | 1.000000 | 2.29959e-37 | 1.000000 |
| rad25                         | 1.30524e-37 | 1.000000 | 1.30524e-37 | 1.000000 |
| rad27                         | 2.91733e-38 | 1.000000 | 2.91733e-38 | 1.000000 |
| rad7                          | 5.34538e-39 | 1.000000 | 5.34538e-39 | 1.000000 |
| rad9                          | 2.51572e-39 | 1.000000 | 2.51572e-39 | 1.000000 |
| rad11                         | 1.78585e-39 | 1.000000 | 1.78585e-39 | 1.000000 |
| rad31                         | 7.89253e-40 | 1.000000 | 7.89253e-40 | 1.000000 |
| rad5                          | 3.18941e-41 | 1.000000 | 3.18941e-41 | 1.000000 |
| rad13                         | 3.00626e-41 | 1.000000 | 3.00626e-41 | 1.000000 |
| rad33                         | 3.11969e-42 | 1.000000 | 3.11969e-42 | 1.000000 |
| rad15                         | 1.10907e-42 | 1.000000 | 1.10907e-42 | 1.000000 |
| rad19syn                      | 8.89196e-44 | 1.000000 | 8.89196e-44 | 1.000000 |
| rad20                         | 3.28786e-44 | 1.000000 | 3.28786e-44 | 1.000000 |
| rad21                         | 2.84110e-44 | 1.000000 | 2.84110e-44 | 1.000000 |
| rad12                         | 2.54170e-45 | 1.000000 | 2.54170e-45 | 1.000000 |
| rad18                         | 1.66779e-46 | 1.000000 | 1.66779e-46 | 1.000000 |
| rad23                         | 1.32889e-46 | 1.000000 | 1.32889e-46 | 1.000000 |
| rad45                         | 2.34483e-48 | 1.000000 | 2.34483e-48 | 1.000000 |

|       |             |         |             |         |
|-------|-------------|---------|-------------|---------|
| rad22 | 4.93885e-49 | 1.00000 | 4.93885e-49 | 1.00000 |
| rad24 | 1.99557e-49 | 1.00000 | 1.99557e-49 | 1.00000 |
| rad36 | 1.44540e-49 | 1.00000 | 1.44540e-49 | 1.00000 |
| rad8  | 3.08693e-66 | 1.00000 | 3.08693e-66 | 1.00000 |

0.100000000E-07 Pa, 180.00000 K

=====

| Rate constant             | True (fraction)        | Effective (fraction)   |
|---------------------------|------------------------|------------------------|
| Total                     | 1.12884e-14 (1.00 )    | 1.12884e-14 (1.00 )    |
| Formation of rad19        | 1.12881e-14 (1.000 )   | 1.12881e-14 (1.000 )   |
| H-abstraction to cyc2enyl | 2.75916e-19 (2.44e-05) | 2.75916e-19 (2.44e-05) |
| H-abstraction to cyclenyl | 2.39955e-23 (2.13e-09) | 2.39955e-23 (2.13e-09) |

  

| species                       | PYtrue      | Cumul    | PYeffective | Cumul    |
|-------------------------------|-------------|----------|-------------|----------|
| Indene+H                      | 0.999638    | 0.999638 | 0.999638    | 0.999638 |
| PhCHCCH2+H                    | 0.000320239 | 0.999958 | 0.000320239 | 0.999958 |
| Benzene+cycloprop-2-enylidene | 2.44424e-05 | 0.999982 | 2.44424e-05 | 0.999982 |
| PhCCH+CH3                     | 5.69151e-06 | 0.999988 | 5.69151e-06 | 0.999988 |
| C2H2+PhCH2                    | 4.41182e-06 | 0.999992 | 4.41182e-06 | 0.999992 |
| PhCCCH3+H                     | 3.34271e-06 | 0.999996 | 3.34271e-06 | 0.999996 |
| Ph+MeAc                       | 2.73412e-06 | 0.999998 | 2.73412e-06 | 0.999998 |
| rad67                         | 8.07010e-07 | 0.999999 | 8.07010e-07 | 0.999999 |
| rad35                         | 3.49603e-07 | 1.000000 | 3.49603e-07 | 1.000000 |
| Ph+Allene                     | 2.89684e-07 | 1.000000 | 2.89684e-07 | 1.000000 |
| PhCH2CCH+H                    | 3.99486e-08 | 1.000000 | 3.99486e-08 | 1.000000 |
| PAH7+H                        | 3.42855e-08 | 1.000000 | 3.42855e-08 | 1.000000 |
| rad39                         | 9.67359e-09 | 1.000000 | 9.67359e-09 | 1.000000 |
| rad37                         | 9.25289e-09 | 1.000000 | 9.25289e-09 | 1.000000 |
| rad30                         | 6.63280e-09 | 1.000000 | 6.63280e-09 | 1.000000 |
| Benzene+cycloprop-1-enylidene | 2.12567e-09 | 1.000000 | 2.12567e-09 | 1.000000 |
| PAH9+H                        | 5.06928e-10 | 1.000000 | 5.06928e-10 | 1.000000 |
| rad38                         | 2.29255e-10 | 1.000000 | 2.29255e-10 | 1.000000 |
| rad60syn                      | 3.57046e-11 | 1.000000 | 3.57046e-11 | 1.000000 |
| PAH10+CH3                     | 2.35102e-11 | 1.000000 | 2.35102e-11 | 1.000000 |
| PAH3+H                        | 1.86591e-11 | 1.000000 | 1.86591e-11 | 1.000000 |
| rad60anti                     | 1.77718e-11 | 1.000000 | 1.77718e-11 | 1.000000 |
| rad46                         | 1.45760e-11 | 1.000000 | 1.45760e-11 | 1.000000 |
| PhcycC3H3_A+H                 | 1.01655e-11 | 1.000000 | 1.01655e-11 | 1.000000 |
| rad59                         | 3.71052e-12 | 1.000000 | 3.71052e-12 | 1.000000 |
| rad43                         | 9.19879e-13 | 1.000000 | 9.19879e-13 | 1.000000 |
| rad54                         | 8.60523e-13 | 1.000000 | 8.60523e-13 | 1.000000 |
| rad62                         | 2.04292e-13 | 1.000000 | 2.04292e-13 | 1.000000 |
| rad50                         | 1.42141e-13 | 1.000000 | 1.42141e-13 | 1.000000 |
| Phenyl+cycC3H4                | 8.44565e-14 | 1.000000 | 0.000000    | 1.000000 |
| PhcycC3H3_B+H                 | 2.84776e-14 | 1.000000 | 2.84776e-14 | 1.000000 |
| rad70                         | 2.05555e-14 | 1.000000 | 2.05555e-14 | 1.000000 |
| rad55                         | 9.11579e-15 | 1.000000 | 9.11579e-15 | 1.000000 |
| PAH1+H                        | 7.32394e-15 | 1.000000 | 7.32394e-15 | 1.000000 |
| rad52                         | 1.21498e-15 | 1.000000 | 1.21498e-15 | 1.000000 |
| rad58                         | 5.98636e-16 | 1.000000 | 5.98636e-16 | 1.000000 |
| rad51                         | 4.25485e-16 | 1.000000 | 4.25485e-16 | 1.000000 |
| rad34                         | 4.00857e-16 | 1.000000 | 4.00857e-16 | 1.000000 |
| rad41                         | 8.74643e-17 | 1.000000 | 8.74643e-17 | 1.000000 |
| rad42                         | 6.22157e-17 | 1.000000 | 6.22157e-17 | 1.000000 |
| rad65                         | 9.95949e-18 | 1.000000 | 9.95949e-18 | 1.000000 |
| rad53                         | 3.16150e-19 | 1.000000 | 3.16150e-19 | 1.000000 |
| rad64                         | 5.99926e-20 | 1.000000 | 5.99926e-20 | 1.000000 |
| rad61                         | 4.00801e-21 | 1.000000 | 4.00801e-21 | 1.000000 |
| rad56                         | 1.79227e-22 | 1.000000 | 1.79227e-22 | 1.000000 |
| rad68syn                      | 1.75240e-23 | 1.000000 | 1.75240e-23 | 1.000000 |
| rad68anti                     | 1.37247e-23 | 1.000000 | 1.37247e-23 | 1.000000 |
| rad40syn                      | 3.05803e-26 | 1.000000 | 3.05803e-26 | 1.000000 |
| rad40anti                     | 2.44831e-26 | 1.000000 | 2.44831e-26 | 1.000000 |
| rad73                         | 1.39313e-27 | 1.000000 | 1.39313e-27 | 1.000000 |
| PAH8+H                        | 1.32188e-27 | 1.000000 | 1.32188e-27 | 1.000000 |
| rad71                         | 1.48898e-30 | 1.000000 | 1.48898e-30 | 1.000000 |
| rad47                         | 6.50507e-34 | 1.000000 | 6.50507e-34 | 1.000000 |
| rad26                         | 3.71041e-34 | 1.000000 | 3.71041e-34 | 1.000000 |
| rad19anti                     | 2.31119e-34 | 1.000000 | 2.31119e-34 | 1.000000 |
| rad2                          | 1.17518e-34 | 1.000000 | 1.17518e-34 | 1.000000 |
| rad28                         | 8.93655e-35 | 1.000000 | 8.93655e-35 | 1.000000 |
| rad6                          | 7.71573e-35 | 1.000000 | 7.71573e-35 | 1.000000 |
| rad1                          | 7.84689e-36 | 1.000000 | 7.84689e-36 | 1.000000 |
| rad10                         | 4.46172e-36 | 1.000000 | 4.46172e-36 | 1.000000 |
| rad3                          | 1.28308e-36 | 1.000000 | 1.28308e-36 | 1.000000 |
| rad4                          | 6.57109e-37 | 1.000000 | 6.57109e-37 | 1.000000 |
| rad14                         | 2.30674e-37 | 1.000000 | 2.30674e-37 | 1.000000 |
| rad25                         | 1.33411e-37 | 1.000000 | 1.33411e-37 | 1.000000 |

|          |             |          |             |          |
|----------|-------------|----------|-------------|----------|
| rad27    | 3.01471e-38 | 1.000000 | 3.01471e-38 | 1.000000 |
| rad7     | 5.70566e-39 | 1.000000 | 5.70566e-39 | 1.000000 |
| rad9     | 3.44179e-39 | 1.000000 | 3.44179e-39 | 1.000000 |
| rad11    | 1.89211e-39 | 1.000000 | 1.89211e-39 | 1.000000 |
| rad31    | 1.69327e-39 | 1.000000 | 1.69327e-39 | 1.000000 |
| rad13    | 3.21452e-41 | 1.000000 | 3.21452e-41 | 1.000000 |
| rad5     | 3.04530e-41 | 1.000000 | 3.04530e-41 | 1.000000 |
| rad33    | 3.55971e-42 | 1.000000 | 3.55971e-42 | 1.000000 |
| rad15    | 1.51923e-42 | 1.000000 | 1.51923e-42 | 1.000000 |
| rad19syn | 2.57212e-43 | 1.000000 | 2.57212e-43 | 1.000000 |
| rad20    | 3.91929e-44 | 1.000000 | 3.91929e-44 | 1.000000 |
| rad21    | 3.42011e-44 | 1.000000 | 3.42011e-44 | 1.000000 |
| rad12    | 3.94232e-45 | 1.000000 | 3.94232e-45 | 1.000000 |
| rad23    | 3.64134e-46 | 1.000000 | 3.64134e-46 | 1.000000 |
| rad18    | 1.79862e-46 | 1.000000 | 1.79862e-46 | 1.000000 |
| rad45    | 7.63506e-48 | 1.000000 | 7.63506e-48 | 1.000000 |
| rad22    | 5.03687e-49 | 1.000000 | 5.03687e-49 | 1.000000 |
| rad36    | 4.71622e-49 | 1.000000 | 4.71622e-49 | 1.000000 |
| rad24    | 2.79582e-49 | 1.000000 | 2.79582e-49 | 1.000000 |
| rad8     | 4.95693e-66 | 1.000000 | 4.95693e-66 | 1.000000 |

0.100000000E-07 Pa, 190.000000 K

| Rate constant             | True (fraction)        | Effective (fraction)   |
|---------------------------|------------------------|------------------------|
| Total                     | 1.32132e-14 (1.00 )    | 1.32132e-14 (1.00 )    |
| Formation of rad19        | 1.32126e-14 (1.000 )   | 1.32126e-14 (1.000 )   |
| H-abstraction to cyc2enyl | 5.62053e-19 (4.25e-05) | 5.62053e-19 (4.25e-05) |
| H-abstraction to cyclenyl | 8.18073e-23 (6.19e-09) | 8.18073e-23 (6.19e-09) |

| species                       | PYtrue      | Cumul    | PYeffective | Cumul    |
|-------------------------------|-------------|----------|-------------|----------|
| Indene+H                      | 0.999606    | 0.999606 | 0.999606    | 0.999606 |
| PhCHCCH2+H                    | 0.000332293 | 0.999939 | 0.000332293 | 0.999939 |
| Benzene+cycloprop-2-enylidene | 4.25373e-05 | 0.999981 | 4.25373e-05 | 0.999981 |
| PhCCH+CH3                     | 5.91707e-06 | 0.999987 | 5.91707e-06 | 0.999987 |
| C2H2+PhCH2                    | 4.63023e-06 | 0.999992 | 4.63023e-06 | 0.999992 |
| PhCCCH3+H                     | 3.49167e-06 | 0.999995 | 3.49167e-06 | 0.999995 |
| Ph+MeAc                       | 2.88479e-06 | 0.999998 | 2.88479e-06 | 0.999998 |
| rad67                         | 8.49457e-07 | 0.999999 | 8.49457e-07 | 0.999999 |
| rad35                         | 3.67207e-07 | 0.999999 | 3.67207e-07 | 0.999999 |
| Ph+Allene                     | 3.12197e-07 | 1.000000 | 3.12197e-07 | 1.000000 |
| PhCH2CCH+H                    | 4.36151e-08 | 1.000000 | 4.36151e-08 | 1.000000 |
| PAH7+H                        | 3.65230e-08 | 1.000000 | 3.65230e-08 | 1.000000 |
| rad39                         | 1.03032e-08 | 1.000000 | 1.03032e-08 | 1.000000 |
| rad37                         | 9.89464e-09 | 1.000000 | 9.89464e-09 | 1.000000 |
| rad30                         | 6.98058e-09 | 1.000000 | 6.98058e-09 | 1.000000 |
| Benzene+cycloprop-1-enylidene | 6.19133e-09 | 1.000000 | 6.19133e-09 | 1.000000 |
| PAH9+H                        | 5.42590e-10 | 1.000000 | 5.42590e-10 | 1.000000 |
| rad38                         | 2.47359e-10 | 1.000000 | 2.47359e-10 | 1.000000 |
| rad60syn                      | 3.84183e-11 | 1.000000 | 3.84183e-11 | 1.000000 |
| PAH10+CH3                     | 2.71459e-11 | 1.000000 | 2.71459e-11 | 1.000000 |
| PAH3+H                        | 2.06610e-11 | 1.000000 | 2.06610e-11 | 1.000000 |
| rad60anti                     | 1.91607e-11 | 1.000000 | 1.91607e-11 | 1.000000 |
| rad46                         | 1.58119e-11 | 1.000000 | 1.58119e-11 | 1.000000 |
| PhcycC3H3_A+H                 | 1.33135e-11 | 1.000000 | 1.33135e-11 | 1.000000 |
| rad59                         | 4.08946e-12 | 1.000000 | 4.08946e-12 | 1.000000 |
| rad43                         | 1.04096e-12 | 1.000000 | 1.04096e-12 | 1.000000 |
| rad54                         | 9.92552e-13 | 1.000000 | 9.92552e-13 | 1.000000 |
| rad62                         | 2.31631e-13 | 1.000000 | 2.31631e-13 | 1.000000 |
| rad50                         | 1.60801e-13 | 1.000000 | 1.60801e-13 | 1.000000 |
| Phenyl+cycC3H4                | 1.24603e-13 | 1.000000 | 0.00000     | 1.000000 |
| PhcycC3H3_B+H                 | 5.08976e-14 | 1.000000 | 5.08976e-14 | 1.000000 |
| rad70                         | 2.47658e-14 | 1.000000 | 2.47658e-14 | 1.000000 |
| rad55                         | 1.09840e-14 | 1.000000 | 1.09840e-14 | 1.000000 |
| PAH1+H                        | 9.37357e-15 | 1.000000 | 9.37357e-15 | 1.000000 |
| rad52                         | 1.41930e-15 | 1.000000 | 1.41930e-15 | 1.000000 |
| rad58                         | 7.35874e-16 | 1.000000 | 7.35874e-16 | 1.000000 |
| rad51                         | 5.16512e-16 | 1.000000 | 5.16512e-16 | 1.000000 |
| rad34                         | 5.15049e-16 | 1.000000 | 5.15049e-16 | 1.000000 |
| rad41                         | 1.17041e-16 | 1.000000 | 1.17041e-16 | 1.000000 |
| rad42                         | 8.10502e-17 | 1.000000 | 8.10502e-17 | 1.000000 |
| rad65                         | 1.22862e-17 | 1.000000 | 1.22862e-17 | 1.000000 |
| rad53                         | 5.56219e-19 | 1.000000 | 5.56219e-19 | 1.000000 |
| rad64                         | 1.17042e-19 | 1.000000 | 1.17042e-19 | 1.000000 |
| rad61                         | 1.05588e-20 | 1.000000 | 1.05588e-20 | 1.000000 |
| rad56                         | 5.33231e-22 | 1.000000 | 5.33231e-22 | 1.000000 |
| rad68syn                      | 5.52671e-23 | 1.000000 | 5.52671e-23 | 1.000000 |
| rad68anti                     | 4.30019e-23 | 1.000000 | 4.30019e-23 | 1.000000 |
| rad40syn                      | 1.47212e-25 | 1.000000 | 1.47212e-25 | 1.000000 |

|           |             |          |             |          |
|-----------|-------------|----------|-------------|----------|
| rad40anti | 1.18054e-25 | 1.000000 | 1.18054e-25 | 1.000000 |
| PAH8+H    | 8.53886e-27 | 1.000000 | 8.53886e-27 | 1.000000 |
| rad73     | 6.34253e-27 | 1.000000 | 6.34253e-27 | 1.000000 |
| rad71     | 1.07847e-29 | 1.000000 | 1.07847e-29 | 1.000000 |
| rad47     | 6.79798e-34 | 1.000000 | 6.79798e-34 | 1.000000 |
| rad19anti | 6.45010e-34 | 1.000000 | 6.45010e-34 | 1.000000 |
| rad26     | 3.48224e-34 | 1.000000 | 3.48224e-34 | 1.000000 |
| rad2      | 1.44181e-34 | 1.000000 | 1.44181e-34 | 1.000000 |
| rad6      | 9.15688e-35 | 1.000000 | 9.15688e-35 | 1.000000 |
| rad28     | 8.30637e-35 | 1.000000 | 8.30637e-35 | 1.000000 |
| rad1      | 9.69482e-36 | 1.000000 | 9.69482e-36 | 1.000000 |
| rad10     | 7.71927e-36 | 1.000000 | 7.71927e-36 | 1.000000 |
| rad3      | 1.02875e-36 | 1.000000 | 1.02875e-36 | 1.000000 |
| rad4      | 5.27859e-37 | 1.000000 | 5.27859e-37 | 1.000000 |
| rad14     | 2.32831e-37 | 1.000000 | 2.32831e-37 | 1.000000 |
| rad25     | 1.37281e-37 | 1.000000 | 1.37281e-37 | 1.000000 |
| rad27     | 3.13788e-38 | 1.000000 | 3.13788e-38 | 1.000000 |
| rad7      | 6.78432e-39 | 1.000000 | 6.78432e-39 | 1.000000 |
| rad9      | 4.80275e-39 | 1.000000 | 4.80275e-39 | 1.000000 |
| rad31     | 3.79748e-39 | 1.000000 | 3.79748e-39 | 1.000000 |
| rad11     | 2.17789e-39 | 1.000000 | 2.17789e-39 | 1.000000 |
| rad13     | 3.82718e-41 | 1.000000 | 3.82718e-41 | 1.000000 |
| rad5      | 2.91893e-41 | 1.000000 | 2.91893e-41 | 1.000000 |
| rad33     | 4.11279e-42 | 1.000000 | 4.11279e-42 | 1.000000 |
| rad15     | 2.12299e-42 | 1.000000 | 2.12299e-42 | 1.000000 |
| rad19syn  | 7.83212e-43 | 1.000000 | 7.83212e-43 | 1.000000 |
| rad20     | 4.72933e-44 | 1.000000 | 4.72933e-44 | 1.000000 |
| rad21     | 4.16987e-44 | 1.000000 | 4.16987e-44 | 1.000000 |
| rad12     | 6.26883e-45 | 1.000000 | 6.26883e-45 | 1.000000 |
| rad23     | 1.08948e-45 | 1.000000 | 1.08948e-45 | 1.000000 |
| rad18     | 1.95369e-46 | 1.000000 | 1.95369e-46 | 1.000000 |
| rad45     | 2.38247e-47 | 1.000000 | 2.38247e-47 | 1.000000 |
| rad36     | 1.47518e-48 | 1.000000 | 1.47518e-48 | 1.000000 |
| rad22     | 5.17050e-49 | 1.000000 | 5.17050e-49 | 1.000000 |
| rad24     | 3.99373e-49 | 1.000000 | 3.99373e-49 | 1.000000 |
| rad8      | 8.12778e-66 | 1.000000 | 8.12778e-66 | 1.000000 |

0.100000000E-07 Pa, 200.000000 K

| Rate constant             | True (fraction)        | Effective (fraction)   |
|---------------------------|------------------------|------------------------|
| Total                     | 1.52621e-14 (1.00 )    | 1.52621e-14 (1.00 )    |
| Formation of rad19        | 1.52610e-14 (1.000 )   | 1.52610e-14 (1.000 )   |
| H-abstraction to cyc2enyl | 1.06427e-18 (6.97e-05) | 1.06427e-18 (6.97e-05) |
| H-abstraction to cyc1enyl | 2.46309e-22 (1.61e-08) | 2.46309e-22 (1.61e-08) |

| species                       | PYtrue      | Cumul    | PYeffective | Cumul    |
|-------------------------------|-------------|----------|-------------|----------|
| Indene+H                      | 0.999565    | 0.999565 | 0.999565    | 0.999565 |
| PhCHCCH2+H                    | 0.000345433 | 0.999911 | 0.000345433 | 0.999911 |
| Benzene+cycloprop-2-enylidene | 6.97330e-05 | 0.999980 | 6.97330e-05 | 0.999980 |
| PhCCH+CH3                     | 6.16243e-06 | 0.999987 | 6.16243e-06 | 0.999987 |
| C2H2+PhCH2                    | 4.87110e-06 | 0.999991 | 4.87110e-06 | 0.999991 |
| PhCCCH3+H                     | 3.65492e-06 | 0.999995 | 3.65492e-06 | 0.999995 |
| Ph+MeAc                       | 3.05169e-06 | 0.999998 | 3.05169e-06 | 0.999998 |
| rad67                         | 8.96414e-07 | 0.999999 | 8.96414e-07 | 0.999999 |
| rad35                         | 3.86641e-07 | 0.999999 | 3.86641e-07 | 0.999999 |
| Ph+Allene                     | 3.37776e-07 | 1.000000 | 3.37776e-07 | 1.000000 |
| PhCH2CCH+H                    | 4.78388e-08 | 1.000000 | 4.78388e-08 | 1.000000 |
| PAH7+H                        | 3.90324e-08 | 1.000000 | 3.90324e-08 | 1.000000 |
| Benzene+cycloprop-1-enylidene | 1.61386e-08 | 1.000000 | 1.61386e-08 | 1.000000 |
| rad39                         | 1.10085e-08 | 1.000000 | 1.10085e-08 | 1.000000 |
| rad37                         | 1.06172e-08 | 1.000000 | 1.06172e-08 | 1.000000 |
| rad30                         | 7.36603e-09 | 1.000000 | 7.36603e-09 | 1.000000 |
| PAH9+H                        | 5.82902e-10 | 1.000000 | 5.82902e-10 | 1.000000 |
| rad38                         | 2.68036e-10 | 1.000000 | 2.68036e-10 | 1.000000 |
| rad60syn                      | 4.15004e-11 | 1.000000 | 4.15004e-11 | 1.000000 |
| PAH10+CH3                     | 3.15724e-11 | 1.000000 | 3.15724e-11 | 1.000000 |
| PAH3+H                        | 2.30055e-11 | 1.000000 | 2.30055e-11 | 1.000000 |
| rad60anti                     | 2.07416e-11 | 1.000000 | 2.07416e-11 | 1.000000 |
| PhcycC3H3_A+H                 | 1.75314e-11 | 1.000000 | 1.75314e-11 | 1.000000 |
| rad46                         | 1.72300e-11 | 1.000000 | 1.72300e-11 | 1.000000 |
| rad59                         | 4.53088e-12 | 1.000000 | 4.53088e-12 | 1.000000 |
| rad43                         | 1.18504e-12 | 1.000000 | 1.18504e-12 | 1.000000 |
| rad54                         | 1.15325e-12 | 1.000000 | 1.15325e-12 | 1.000000 |
| rad62                         | 2.64143e-13 | 1.000000 | 2.64143e-13 | 1.000000 |
| Phenyl+cycC3H4                | 1.83626e-13 | 1.000000 | 0.000000    | 1.000000 |
| rad50                         | 1.83198e-13 | 1.000000 | 1.83198e-13 | 1.000000 |
| PhcycC3H3_B+H                 | 8.87690e-14 | 1.000000 | 8.87690e-14 | 1.000000 |
| rad70                         | 3.01009e-14 | 1.000000 | 3.01009e-14 | 1.000000 |

|           |             |          |             |          |
|-----------|-------------|----------|-------------|----------|
| rad55     | 1.33496e-14 | 1.000000 | 1.33496e-14 | 1.000000 |
| PAH1+H    | 1.21077e-14 | 1.000000 | 1.21077e-14 | 1.000000 |
| rad52     | 1.67258e-15 | 1.000000 | 1.67258e-15 | 1.000000 |
| rad58     | 9.13220e-16 | 1.000000 | 9.13220e-16 | 1.000000 |
| rad34     | 6.67958e-16 | 1.000000 | 6.67958e-16 | 1.000000 |
| rad51     | 6.33617e-16 | 1.000000 | 6.33617e-16 | 1.000000 |
| rad41     | 1.57585e-16 | 1.000000 | 1.57585e-16 | 1.000000 |
| rad42     | 1.06227e-16 | 1.000000 | 1.06227e-16 | 1.000000 |
| rad65     | 1.53192e-17 | 1.000000 | 1.53192e-17 | 1.000000 |
| rad53     | 9.61974e-19 | 1.000000 | 9.61974e-19 | 1.000000 |
| rad64     | 2.21495e-19 | 1.000000 | 2.21495e-19 | 1.000000 |
| rad61     | 2.60103e-20 | 1.000000 | 2.60103e-20 | 1.000000 |
| rad56     | 1.46279e-21 | 1.000000 | 1.46279e-21 | 1.000000 |
| rad68syn  | 1.59261e-22 | 1.000000 | 1.59261e-22 | 1.000000 |
| rad68anti | 1.23075e-22 | 1.000000 | 1.23075e-22 | 1.000000 |
| rad40syn  | 6.17076e-25 | 1.000000 | 6.17076e-25 | 1.000000 |
| rad40anti | 4.95189e-25 | 1.000000 | 4.95189e-25 | 1.000000 |
| PAH8+H    | 4.65852e-26 | 1.000000 | 4.65852e-26 | 1.000000 |
| rad73     | 2.55582e-26 | 1.000000 | 2.55582e-26 | 1.000000 |
| rad71     | 6.53613e-29 | 1.000000 | 6.53613e-29 | 1.000000 |
| rad19anti | 1.88664e-33 | 1.000000 | 1.88664e-33 | 1.000000 |
| rad47     | 7.19638e-34 | 1.000000 | 7.19638e-34 | 1.000000 |
| rad26     | 3.27845e-34 | 1.000000 | 3.27845e-34 | 1.000000 |
| rad2      | 1.53201e-34 | 1.000000 | 1.53201e-34 | 1.000000 |
| rad6      | 1.28227e-34 | 1.000000 | 1.28227e-34 | 1.000000 |
| rad28     | 7.74419e-35 | 1.000000 | 7.74419e-35 | 1.000000 |
| rad10     | 1.19644e-35 | 1.000000 | 1.19644e-35 | 1.000000 |
| rad1      | 1.03806e-35 | 1.000000 | 1.03806e-35 | 1.000000 |
| rad3      | 4.22852e-36 | 1.000000 | 4.22852e-36 | 1.000000 |
| rad4      | 2.17416e-36 | 1.000000 | 2.17416e-36 | 1.000000 |
| rad14     | 2.36381e-37 | 1.000000 | 2.36381e-37 | 1.000000 |
| rad25     | 1.42166e-37 | 1.000000 | 1.42166e-37 | 1.000000 |
| rad27     | 3.28854e-38 | 1.000000 | 3.28854e-38 | 1.000000 |
| rad7      | 9.51699e-39 | 1.000000 | 9.51699e-39 | 1.000000 |
| rad31     | 8.89667e-39 | 1.000000 | 8.89667e-39 | 1.000000 |
| rad9      | 6.83521e-39 | 1.000000 | 6.83521e-39 | 1.000000 |
| rad11     | 2.86993e-39 | 1.000000 | 2.86993e-39 | 1.000000 |
| rad13     | 5.37220e-41 | 1.000000 | 5.37220e-41 | 1.000000 |
| rad5      | 2.80710e-41 | 1.000000 | 2.80710e-41 | 1.000000 |
| rad33     | 4.81640e-42 | 1.000000 | 4.81640e-42 | 1.000000 |
| rad15     | 3.02617e-42 | 1.000000 | 3.02617e-42 | 1.000000 |
| rad19syn  | 2.51002e-42 | 1.000000 | 2.51002e-42 | 1.000000 |
| rad20     | 5.77552e-44 | 1.000000 | 5.77552e-44 | 1.000000 |
| rad21     | 5.14817e-44 | 1.000000 | 5.14817e-44 | 1.000000 |
| rad12     | 1.02213e-44 | 1.000000 | 1.02213e-44 | 1.000000 |
| rad23     | 3.56788e-45 | 1.000000 | 3.56788e-45 | 1.000000 |
| rad18     | 2.13655e-46 | 1.000000 | 2.13655e-46 | 1.000000 |
| rad45     | 5.74889e-47 | 1.000000 | 5.74889e-47 | 1.000000 |
| rad36     | 3.56970e-48 | 1.000000 | 3.56970e-48 | 1.000000 |
| rad24     | 5.81686e-49 | 1.000000 | 5.81686e-49 | 1.000000 |
| rad22     | 5.35715e-49 | 1.000000 | 5.35715e-49 | 1.000000 |
| rad8      | 1.36072e-65 | 1.000000 | 1.36072e-65 | 1.000000 |

0.100000000E-07 Pa, 210.000000 K

| Rate constant             | True (fraction)        | Effective (fraction)   |
|---------------------------|------------------------|------------------------|
| Total                     | 1.74272e-14 (1.00)     | 1.74272e-14 (1.00)     |
| Formation of rad19        | 1.74253e-14 (1.000)    | 1.74253e-14 (1.000)    |
| H-abstraction to cyc2enyl | 1.89310e-18 (0.000109) | 1.89310e-18 (0.000109) |
| H-abstraction to cyc1enyl | 6.66714e-22 (3.83e-08) | 6.66714e-22 (3.83e-08) |

| species                       | PYtrue      | Cumul    | PYeffective | Cumul    |
|-------------------------------|-------------|----------|-------------|----------|
| Indene+H                      | 0.999511    | 0.999511 | 0.999511    | 0.999511 |
| PhCHCCH2+H                    | 0.000359771 | 0.999871 | 0.000359771 | 0.999871 |
| Benzene+cycloprop-2-enylidene | 0.000108629 | 0.999980 | 0.000108629 | 0.999980 |
| PhCCH+CH3                     | 6.42954e-06 | 0.999986 | 6.42954e-06 | 0.999986 |
| C2H2+PhCH2                    | 5.13705e-06 | 0.999991 | 5.13705e-06 | 0.999991 |
| PhCCCH3+H                     | 3.83397e-06 | 0.999995 | 3.83397e-06 | 0.999995 |
| Ph+MeAc                       | 3.23682e-06 | 0.999998 | 3.23682e-06 | 0.999998 |
| rad67                         | 9.48433e-07 | 0.999999 | 9.48433e-07 | 0.999999 |
| rad35                         | 4.08123e-07 | 1.000000 | 4.08123e-07 | 1.000000 |
| Ph+Allene                     | 3.66908e-07 | 1.000000 | 3.66908e-07 | 1.000000 |
| PhCH2CCH+H                    | 5.27181e-08 | 1.000000 | 5.27181e-08 | 1.000000 |
| PAH7+H                        | 4.18517e-08 | 1.000000 | 4.18517e-08 | 1.000000 |
| Benzene+cycloprop-1-enylidene | 3.82571e-08 | 1.000000 | 3.82571e-08 | 1.000000 |
| rad39                         | 1.18003e-08 | 1.000000 | 1.18003e-08 | 1.000000 |
| rad37                         | 1.14322e-08 | 1.000000 | 1.14322e-08 | 1.000000 |
| rad30                         | 7.79386e-09 | 1.000000 | 7.79386e-09 | 1.000000 |



|                |             |         |             |         |
|----------------|-------------|---------|-------------|---------|
| PAH9+H         | 6.28582e-10 | 1.00000 | 6.28582e-10 | 1.00000 |
| rad38          | 2.91718e-10 | 1.00000 | 2.91718e-10 | 1.00000 |
| rad60syn       | 4.50097e-11 | 1.00000 | 4.50097e-11 | 1.00000 |
| PAH10+CH3      | 3.69848e-11 | 1.00000 | 3.69848e-11 | 1.00000 |
| PAH3+H         | 2.57613e-11 | 1.00000 | 2.57613e-11 | 1.00000 |
| PhcycC3H3_A+H  | 2.31914e-11 | 1.00000 | 2.31914e-11 | 1.00000 |
| rad60anti      | 2.25454e-11 | 1.00000 | 2.25454e-11 | 1.00000 |
| rad46          | 1.88621e-11 | 1.00000 | 1.88621e-11 | 1.00000 |
| rad59          | 5.04687e-12 | 1.00000 | 5.04687e-12 | 1.00000 |
| rad43          | 1.35708e-12 | 1.00000 | 1.35708e-12 | 1.00000 |
| rad54          | 1.34969e-12 | 1.00000 | 1.34969e-12 | 1.00000 |
| rad62          | 3.02922e-13 | 1.00000 | 3.02922e-13 | 1.00000 |
| Phenyl+cycC3H4 | 2.70226e-13 | 1.00000 | 0.00000     | 1.00000 |
| rad50          | 2.10210e-13 | 1.00000 | 2.10210e-13 | 1.00000 |
| PhcycC3H3_B+H  | 1.51586e-13 | 1.00000 | 1.51586e-13 | 1.00000 |
| rad70          | 3.68946e-14 | 1.00000 | 3.68946e-14 | 1.00000 |
| rad55          | 1.63588e-14 | 1.00000 | 1.63588e-14 | 1.00000 |
| PAH1+H         | 1.57712e-14 | 1.00000 | 1.57712e-14 | 1.00000 |
| rad52          | 1.98838e-15 | 1.00000 | 1.98838e-15 | 1.00000 |
| rad58          | 1.14364e-15 | 1.00000 | 1.14364e-15 | 1.00000 |
| rad34          | 8.73664e-16 | 1.00000 | 8.73664e-16 | 1.00000 |
| rad51          | 7.85267e-16 | 1.00000 | 7.85267e-16 | 1.00000 |
| rad41          | 2.13280e-16 | 1.00000 | 2.13280e-16 | 1.00000 |
| rad42          | 1.39947e-16 | 1.00000 | 1.39947e-16 | 1.00000 |
| rad65          | 1.92990e-17 | 1.00000 | 1.92990e-17 | 1.00000 |
| rad53          | 1.63950e-18 | 1.00000 | 1.63950e-18 | 1.00000 |
| rad64          | 4.08414e-19 | 1.00000 | 4.08414e-19 | 1.00000 |
| rad61          | 6.05363e-20 | 1.00000 | 6.05363e-20 | 1.00000 |
| rad56          | 3.74745e-21 | 1.00000 | 3.74745e-21 | 1.00000 |
| rad68syn       | 4.25367e-22 | 1.00000 | 4.25367e-22 | 1.00000 |
| rad68anti      | 3.26442e-22 | 1.00000 | 3.26442e-22 | 1.00000 |
| rad40syn       | 2.29907e-24 | 1.00000 | 2.29907e-24 | 1.00000 |
| rad40anti      | 1.84461e-24 | 1.00000 | 1.84461e-24 | 1.00000 |
| PAH8+H         | 2.19678e-25 | 1.00000 | 2.19678e-25 | 1.00000 |
| rad73          | 9.27903e-26 | 1.00000 | 9.27903e-26 | 1.00000 |
| rad71          | 3.39170e-28 | 1.00000 | 3.39170e-28 | 1.00000 |
| rad19anti      | 5.76790e-33 | 1.00000 | 5.76790e-33 | 1.00000 |
| rad47          | 7.72082e-34 | 1.00000 | 7.72082e-34 | 1.00000 |
| rad2           | 7.26448e-34 | 1.00000 | 7.26448e-34 | 1.00000 |
| rad26          | 3.09565e-34 | 1.00000 | 3.09565e-34 | 1.00000 |
| rad6           | 2.28032e-34 | 1.00000 | 2.28032e-34 | 1.00000 |
| rad28          | 7.24082e-35 | 1.00000 | 7.24082e-35 | 1.00000 |
| rad1           | 4.96333e-35 | 1.00000 | 4.96333e-35 | 1.00000 |
| rad10          | 2.70441e-35 | 1.00000 | 2.70441e-35 | 1.00000 |
| rad3           | 6.17328e-36 | 1.00000 | 6.17328e-36 | 1.00000 |
| rad4           | 3.18137e-36 | 1.00000 | 3.18137e-36 | 1.00000 |
| rad14          | 2.41312e-37 | 1.00000 | 2.41312e-37 | 1.00000 |
| rad25          | 1.48124e-37 | 1.00000 | 1.48124e-37 | 1.00000 |
| rad27          | 3.46924e-38 | 1.00000 | 3.46924e-38 | 1.00000 |
| rad31          | 2.17525e-38 | 1.00000 | 2.17525e-38 | 1.00000 |
| rad7           | 1.69511e-38 | 1.00000 | 1.69511e-38 | 1.00000 |
| rad9           | 9.92203e-39 | 1.00000 | 9.92203e-39 | 1.00000 |
| rad11          | 4.70174e-39 | 1.00000 | 4.70174e-39 | 1.00000 |
| rad13          | 9.57071e-41 | 1.00000 | 9.57071e-41 | 1.00000 |
| rad5           | 2.70739e-41 | 1.00000 | 2.70739e-41 | 1.00000 |
| rad19syn       | 8.46110e-42 | 1.00000 | 8.46110e-42 | 1.00000 |
| rad33          | 5.73884e-42 | 1.00000 | 5.73884e-42 | 1.00000 |
| rad15          | 4.40034e-42 | 1.00000 | 4.40034e-42 | 1.00000 |
| rad20          | 7.13728e-44 | 1.00000 | 7.13728e-44 | 1.00000 |
| rad21          | 6.43567e-44 | 1.00000 | 6.43567e-44 | 1.00000 |
| rad12          | 1.70940e-44 | 1.00000 | 1.70940e-44 | 1.00000 |
| rad23          | 1.27673e-44 | 1.00000 | 1.27673e-44 | 1.00000 |
| rad45          | 3.25313e-46 | 1.00000 | 3.25313e-46 | 1.00000 |
| rad18          | 2.35163e-46 | 1.00000 | 2.35163e-46 | 1.00000 |
| rad36          | 2.02664e-47 | 1.00000 | 2.02664e-47 | 1.00000 |
| rad24          | 8.63992e-49 | 1.00000 | 8.63992e-49 | 1.00000 |
| rad22          | 5.65629e-49 | 1.00000 | 5.65629e-49 | 1.00000 |
| rad8           | 2.32606e-65 | 1.00000 | 2.32606e-65 | 1.00000 |

0.100000000E-07 Pa, 220.000000 K

| Rate constant             | True (fraction)        | Effective (fraction)   |
|---------------------------|------------------------|------------------------|
| Total                     | 1.97009e-14 (1.00 )    | 1.97009e-14 (1.00 )    |
| Formation of rad19        | 1.96977e-14 (1.000 )   | 1.96977e-14 (1.000 )   |
| H-abstraction to cyc2enyl | 3.19064e-18 (0.000162) | 3.19064e-18 (0.000162) |
| H-abstraction to cyclenyl | 1.64627e-21 (8.36e-08) | 1.64627e-21 (8.36e-08) |
| species                   | PYtrue                 | Cumul                  |
|                           | PYeffective            | Cumul                  |

|                               |             |          |             |          |
|-------------------------------|-------------|----------|-------------|----------|
| Indene+H                      | 0.999441    | 0.999441 | 0.999441    | 0.999441 |
| PhCHCH2+H                     | 0.000375424 | 0.999816 | 0.000375424 | 0.999816 |
| Benzene+cycloprop-2-enylidene | 0.000161954 | 0.999978 | 0.000161954 | 0.999978 |
| PhCCH+CH3                     | 6.72039e-06 | 0.999985 | 6.72039e-06 | 0.999985 |
| C2H2+PhCH2                    | 5.43098e-06 | 0.999991 | 5.43098e-06 | 0.999991 |
| PhCCCH3+H                     | 4.03052e-06 | 0.999995 | 4.03052e-06 | 0.999995 |
| Ph+MeAc                       | 3.44236e-06 | 0.999998 | 3.44236e-06 | 0.999998 |
| rad67                         | 1.00612e-06 | 0.999999 | 1.00612e-06 | 0.999999 |
| rad35                         | 4.31892e-07 | 0.999999 | 4.31892e-07 | 0.999999 |
| Ph+Allene                     | 4.00152e-07 | 1.000000 | 4.00152e-07 | 1.000000 |
| Benzene+cycloprop-1-enylidene | 8.35632e-08 | 1.000000 | 8.35632e-08 | 1.000000 |
| PhCH2CCH+H                    | 5.83685e-08 | 1.000000 | 5.83685e-08 | 1.000000 |
| PAH7+H                        | 4.50239e-08 | 1.000000 | 4.50239e-08 | 1.000000 |
| rad39                         | 1.26902e-08 | 1.000000 | 1.26902e-08 | 1.000000 |
| rad37                         | 1.23532e-08 | 1.000000 | 1.23532e-08 | 1.000000 |
| rad30                         | 8.26934e-09 | 1.000000 | 8.26934e-09 | 1.000000 |
| PAH9+H                        | 6.80449e-10 | 1.000000 | 6.80449e-10 | 1.000000 |
| rad38                         | 3.18912e-10 | 1.000000 | 3.18912e-10 | 1.000000 |
| rad60syn                      | 4.90141e-11 | 1.000000 | 4.90141e-11 | 1.000000 |
| PAH10+CH3                     | 4.36275e-11 | 1.000000 | 4.36275e-11 | 1.000000 |
| PhcycC3H3_A+H                 | 3.07931e-11 | 1.000000 | 3.07931e-11 | 1.000000 |
| PAH3+H                        | 2.90111e-11 | 1.000000 | 2.90111e-11 | 1.000000 |
| rad60anti                     | 2.46085e-11 | 1.000000 | 2.46085e-11 | 1.000000 |
| rad46                         | 2.07451e-11 | 1.000000 | 2.07451e-11 | 1.000000 |
| rad59                         | 5.65179e-12 | 1.000000 | 5.65179e-12 | 1.000000 |
| rad54                         | 1.59075e-12 | 1.000000 | 1.59075e-12 | 1.000000 |
| rad43                         | 1.56310e-12 | 1.000000 | 1.56310e-12 | 1.000000 |
| Phenyl+cycC3H4                | 3.96956e-13 | 1.000000 | 0.000000    | 1.000000 |
| rad62                         | 3.49289e-13 | 1.000000 | 3.49289e-13 | 1.000000 |
| PhcycC3H3_B+H                 | 2.54101e-13 | 1.000000 | 2.54101e-13 | 1.000000 |
| rad50                         | 2.42929e-13 | 1.000000 | 2.42929e-13 | 1.000000 |
| rad70                         | 4.55816e-14 | 1.000000 | 4.55816e-14 | 1.000000 |
| PAH1+H                        | 2.06978e-14 | 1.000000 | 2.06978e-14 | 1.000000 |
| rad55                         | 2.02024e-14 | 1.000000 | 2.02024e-14 | 1.000000 |
| rad52                         | 2.38419e-15 | 1.000000 | 2.38419e-15 | 1.000000 |
| rad58                         | 1.44438e-15 | 1.000000 | 1.44438e-15 | 1.000000 |
| rad34                         | 1.15142e-15 | 1.000000 | 1.15142e-15 | 1.000000 |
| rad51                         | 9.82815e-16 | 1.000000 | 9.82815e-16 | 1.000000 |
| rad41                         | 2.89888e-16 | 1.000000 | 2.89888e-16 | 1.000000 |
| rad42                         | 1.85167e-16 | 1.000000 | 1.85167e-16 | 1.000000 |
| rad65                         | 2.45506e-17 | 1.000000 | 2.45506e-17 | 1.000000 |
| rad53                         | 2.75830e-18 | 1.000000 | 2.75830e-18 | 1.000000 |
| rad64                         | 7.36243e-19 | 1.000000 | 7.36243e-19 | 1.000000 |
| rad61                         | 1.34204e-19 | 1.000000 | 1.34204e-19 | 1.000000 |
| rad56                         | 9.05591e-21 | 1.000000 | 9.05591e-21 | 1.000000 |
| rad68syn                      | 1.06496e-21 | 1.000000 | 1.06496e-21 | 1.000000 |
| rad68anti                     | 8.11646e-22 | 1.000000 | 8.11646e-22 | 1.000000 |
| rad40syn                      | 7.73817e-24 | 1.000000 | 7.73817e-24 | 1.000000 |
| rad40anti                     | 6.20298e-24 | 1.000000 | 6.20298e-24 | 1.000000 |
| PAH8+H                        | 9.11871e-25 | 1.000000 | 9.11871e-25 | 1.000000 |
| rad73                         | 3.07722e-25 | 1.000000 | 3.07722e-25 | 1.000000 |
| rad71                         | 1.53452e-27 | 1.000000 | 1.53452e-27 | 1.000000 |
| rad19anti                     | 1.83731e-32 | 1.000000 | 1.83731e-32 | 1.000000 |
| rad2                          | 8.62546e-34 | 1.000000 | 8.62546e-34 | 1.000000 |
| rad47                         | 8.39990e-34 | 1.000000 | 8.39990e-34 | 1.000000 |
| rad6                          | 5.25969e-34 | 1.000000 | 5.25969e-34 | 1.000000 |
| rad26                         | 2.93159e-34 | 1.000000 | 2.93159e-34 | 1.000000 |
| rad28                         | 6.79072e-35 | 1.000000 | 6.79072e-35 | 1.000000 |
| rad1                          | 5.94674e-35 | 1.000000 | 5.94674e-35 | 1.000000 |
| rad10                         | 4.60274e-35 | 1.000000 | 4.60274e-35 | 1.000000 |
| rad3                          | 6.41330e-36 | 1.000000 | 6.41330e-36 | 1.000000 |
| rad4                          | 3.31328e-36 | 1.000000 | 3.31328e-36 | 1.000000 |
| rad14                         | 2.47656e-37 | 1.000000 | 2.47656e-37 | 1.000000 |
| rad25                         | 1.55245e-37 | 1.000000 | 1.55245e-37 | 1.000000 |
| rad31                         | 5.54361e-38 | 1.000000 | 5.54361e-38 | 1.000000 |
| rad7                          | 3.91554e-38 | 1.000000 | 3.91554e-38 | 1.000000 |
| rad27                         | 3.68341e-38 | 1.000000 | 3.68341e-38 | 1.000000 |
| rad9                          | 1.46932e-38 | 1.000000 | 1.46932e-38 | 1.000000 |
| rad11                         | 1.00744e-38 | 1.000000 | 1.00744e-38 | 1.000000 |
| rad13                         | 2.21198e-40 | 1.000000 | 2.21198e-40 | 1.000000 |
| rad19syn                      | 2.99699e-41 | 1.000000 | 2.99699e-41 | 1.000000 |
| rad5                          | 2.61784e-41 | 1.000000 | 2.61784e-41 | 1.000000 |
| rad33                         | 7.03122e-42 | 1.000000 | 7.03122e-42 | 1.000000 |
| rad15                         | 6.52837e-42 | 1.000000 | 6.52837e-42 | 1.000000 |
| rad20                         | 8.92522e-44 | 1.000000 | 8.92522e-44 | 1.000000 |
| rad21                         | 8.14608e-44 | 1.000000 | 8.14608e-44 | 1.000000 |
| rad23                         | 4.95668e-44 | 1.000000 | 4.95668e-44 | 1.000000 |
| rad12                         | 2.93345e-44 | 1.000000 | 2.93345e-44 | 1.000000 |
| rad45                         | 1.64022e-45 | 1.000000 | 1.64022e-45 | 1.000000 |
| rad18                         | 2.60448e-46 | 1.000000 | 2.60448e-46 | 1.000000 |

|       |             |         |             |         |
|-------|-------------|---------|-------------|---------|
| rad36 | 1.02571e-46 | 1.00000 | 1.02571e-46 | 1.00000 |
| rad24 | 1.30904e-48 | 1.00000 | 1.30904e-48 | 1.00000 |
| rad22 | 6.27703e-49 | 1.00000 | 6.27703e-49 | 1.00000 |
| rad8  | 4.06073e-65 | 1.00000 | 4.06073e-65 | 1.00000 |

0.100000000E-07 Pa, 230.000000 K

=====

| Rate constant             | True (fraction)        | Effective (fraction)   |
|---------------------------|------------------------|------------------------|
| Total                     | 2.20761e-14 (1.00 )    | 2.20761e-14 (1.00 )    |
| Formation of rad19        | 2.20710e-14 (1.000 )   | 2.20710e-14 (1.000 )   |
| H-abstraction to cyc2enyl | 5.13155e-18 (0.000232) | 5.13155e-18 (0.000232) |
| H-abstraction to cyclenyl | 3.75316e-21 (1.70e-07) | 3.75316e-21 (1.70e-07) |

| species                       | PYtrue      | Cumul    | PYeffective | Cumul    |
|-------------------------------|-------------|----------|-------------|----------|
| Indene+H                      | 0.999352    | 0.999352 | 0.999352    | 0.999352 |
| PhCHCCH2+H                    | 0.000392520 | 0.999745 | 0.000392520 | 0.999745 |
| Benzene+cycloprop-2-enylidene | 0.000232448 | 0.999977 | 0.000232448 | 0.999977 |
| PhCCH+CH3                     | 7.03712e-06 | 0.999984 | 7.03712e-06 | 0.999984 |
| C2H2+PhCH2                    | 5.75601e-06 | 0.999990 | 5.75601e-06 | 0.999990 |
| PhCCCH3+H                     | 4.24633e-06 | 0.999994 | 4.24633e-06 | 0.999994 |
| Ph+MeAc                       | 3.67074e-06 | 0.999998 | 3.67074e-06 | 0.999998 |
| rad67                         | 1.07014e-06 | 0.999999 | 1.07014e-06 | 0.999999 |
| rad35                         | 4.58209e-07 | 1.000000 | 4.58209e-07 | 1.000000 |
| Ph+Allene                     | 4.38150e-07 | 1.000000 | 4.38150e-07 | 1.000000 |
| Benzene+cycloprop-1-enylidene | 1.70010e-07 | 1.000000 | 1.70010e-07 | 1.000000 |
| PhCH2CCH+H                    | 6.49255e-08 | 1.000000 | 6.49255e-08 | 1.000000 |
| PAH7+H                        | 4.85973e-08 | 1.000000 | 4.85973e-08 | 1.000000 |
| rad39                         | 1.36916e-08 | 1.000000 | 1.36916e-08 | 1.000000 |
| rad37                         | 1.33953e-08 | 1.000000 | 1.33953e-08 | 1.000000 |
| rad30                         | 8.79825e-09 | 1.000000 | 8.79825e-09 | 1.000000 |
| PAH9+H                        | 7.39444e-10 | 1.000000 | 7.39444e-10 | 1.000000 |
| rad38                         | 3.50209e-10 | 1.000000 | 3.50209e-10 | 1.000000 |
| rad60syn                      | 5.35915e-11 | 1.000000 | 5.35915e-11 | 1.000000 |
| PAH10+CH3                     | 5.18070e-11 | 1.000000 | 5.18070e-11 | 1.000000 |
| PhcycC3H3_A+H                 | 4.10038e-11 | 1.000000 | 4.10038e-11 | 1.000000 |
| PAH3+H                        | 3.28545e-11 | 1.000000 | 3.28545e-11 | 1.000000 |
| rad60anti                     | 2.69725e-11 | 1.000000 | 2.69725e-11 | 1.000000 |
| rad46                         | 2.29232e-11 | 1.000000 | 2.29232e-11 | 1.000000 |
| rad59                         | 6.36289e-12 | 1.000000 | 6.36289e-12 | 1.000000 |
| rad54                         | 1.88753e-12 | 1.000000 | 1.88753e-12 | 1.000000 |
| rad43                         | 1.81040e-12 | 1.000000 | 1.81040e-12 | 1.000000 |
| Phenyl+cycC3H4                | 5.81829e-13 | 1.000000 | 0.000000    | 1.000000 |
| PhcycC3H3_B+H                 | 4.18958e-13 | 1.000000 | 4.18958e-13 | 1.000000 |
| rad62                         | 4.04844e-13 | 1.000000 | 4.04844e-13 | 1.000000 |
| rad50                         | 2.82714e-13 | 1.000000 | 2.82714e-13 | 1.000000 |
| rad70                         | 5.67286e-14 | 1.000000 | 5.67286e-14 | 1.000000 |
| PAH1+H                        | 2.73412e-14 | 1.000000 | 2.73412e-14 | 1.000000 |
| rad55                         | 2.51284e-14 | 1.000000 | 2.51284e-14 | 1.000000 |
| rad52                         | 2.88263e-15 | 1.000000 | 2.88263e-15 | 1.000000 |
| rad58                         | 1.83842e-15 | 1.000000 | 1.83842e-15 | 1.000000 |
| rad34                         | 1.52752e-15 | 1.000000 | 1.52752e-15 | 1.000000 |
| rad51                         | 1.24150e-15 | 1.000000 | 1.24150e-15 | 1.000000 |
| rad41                         | 3.95307e-16 | 1.000000 | 3.95307e-16 | 1.000000 |
| rad42                         | 2.45831e-16 | 1.000000 | 2.45831e-16 | 1.000000 |
| rad65                         | 3.15147e-17 | 1.000000 | 3.15147e-17 | 1.000000 |
| rad53                         | 4.58652e-18 | 1.000000 | 4.58652e-18 | 1.000000 |
| rad64                         | 1.30089e-18 | 1.000000 | 1.30089e-18 | 1.000000 |
| rad61                         | 2.85229e-19 | 1.000000 | 2.85229e-19 | 1.000000 |
| rad56                         | 2.08059e-20 | 1.000000 | 2.08059e-20 | 1.000000 |
| rad68syn                      | 2.52167e-21 | 1.000000 | 2.52167e-21 | 1.000000 |
| rad68anti                     | 1.90889e-21 | 1.000000 | 1.90889e-21 | 1.000000 |
| rad40syn                      | 2.38315e-23 | 1.000000 | 2.38315e-23 | 1.000000 |
| rad40anti                     | 1.90761e-23 | 1.000000 | 1.90761e-23 | 1.000000 |
| PAH8+H                        | 3.38041e-24 | 1.000000 | 3.38041e-24 | 1.000000 |
| rad73                         | 9.42054e-25 | 1.000000 | 9.42054e-25 | 1.000000 |
| rad71                         | 6.14189e-27 | 1.000000 | 6.14189e-27 | 1.000000 |
| rad19anti                     | 6.07588e-32 | 1.000000 | 6.07588e-32 | 1.000000 |
| rad2                          | 1.99200e-33 | 1.000000 | 1.99200e-33 | 1.000000 |
| rad6                          | 1.53223e-33 | 1.000000 | 1.53223e-33 | 1.000000 |
| rad47                         | 9.27304e-34 | 1.000000 | 9.27304e-34 | 1.000000 |
| rad26                         | 2.78531e-34 | 1.000000 | 2.78531e-34 | 1.000000 |
| rad1                          | 1.38677e-34 | 1.000000 | 1.38677e-34 | 1.000000 |
| rad10                         | 9.90509e-35 | 1.000000 | 9.90509e-35 | 1.000000 |
| rad28                         | 6.39314e-35 | 1.000000 | 6.39314e-35 | 1.000000 |
| rad3                          | 1.24466e-35 | 1.000000 | 1.24466e-35 | 1.000000 |
| rad4                          | 6.44753e-36 | 1.000000 | 6.44753e-36 | 1.000000 |
| rad14                         | 2.55479e-37 | 1.000000 | 2.55479e-37 | 1.000000 |
| rad25                         | 1.63651e-37 | 1.000000 | 1.63651e-37 | 1.000000 |

|          |             |         |             |         |
|----------|-------------|---------|-------------|---------|
| rad31    | 1.47015e-37 | 1.00000 | 1.47015e-37 | 1.00000 |
| rad7     | 1.14226e-37 | 1.00000 | 1.14226e-37 | 1.00000 |
| rad27    | 3.93553e-38 | 1.00000 | 3.93553e-38 | 1.00000 |
| rad11    | 2.80020e-38 | 1.00000 | 2.80020e-38 | 1.00000 |
| rad9     | 2.22042e-38 | 1.00000 | 2.22042e-38 | 1.00000 |
| rad13    | 6.46159e-40 | 1.00000 | 6.46159e-40 | 1.00000 |
| rad19syn | 1.11381e-40 | 1.00000 | 1.11381e-40 | 1.00000 |
| rad5     | 2.53694e-41 | 1.00000 | 2.53694e-41 | 1.00000 |
| rad15    | 9.88504e-42 | 1.00000 | 9.88504e-42 | 1.00000 |
| rad33    | 9.14057e-42 | 1.00000 | 9.14057e-42 | 1.00000 |
| rad23    | 2.08460e-43 | 1.00000 | 2.08460e-43 | 1.00000 |
| rad20    | 1.12948e-43 | 1.00000 | 1.12948e-43 | 1.00000 |
| rad21    | 1.04415e-43 | 1.00000 | 1.04415e-43 | 1.00000 |
| rad12    | 5.16809e-44 | 1.00000 | 5.16809e-44 | 1.00000 |
| rad45    | 6.69072e-45 | 1.00000 | 6.69072e-45 | 1.00000 |
| rad36    | 4.20159e-46 | 1.00000 | 4.20159e-46 | 1.00000 |
| rad18    | 2.90200e-46 | 1.00000 | 2.90200e-46 | 1.00000 |
| rad24    | 2.02383e-48 | 1.00000 | 2.02383e-48 | 1.00000 |
| rad22    | 7.99749e-49 | 1.00000 | 7.99749e-49 | 1.00000 |
| rad8     | 7.24167e-65 | 1.00000 | 7.24167e-65 | 1.00000 |

0.100000000E-07 Pa, 240.00000 K

| Rate constant             | True (fraction)        | Effective (fraction)   |
|---------------------------|------------------------|------------------------|
| Total                     | 2.45462e-14 (1.00 )    | 2.45462e-14 (1.00 )    |
| Formation of rad19        | 2.45383e-14 (1.000 )   | 2.45383e-14 (1.000 )   |
| H-abstraction to cyc2enyl | 7.92234e-18 (0.000323) | 7.92234e-18 (0.000323) |
| H-abstraction to cyclenyl | 7.97958e-21 (3.25e-07) | 7.97958e-21 (3.25e-07) |

| species                       | PYtrue      | Cumul    | PYeffective | Cumul    |
|-------------------------------|-------------|----------|-------------|----------|
| Indene+H                      | 0.999241    | 0.999241 | 0.999241    | 0.999241 |
| PhCHCCH2+H                    | 0.000411192 | 0.999652 | 0.000411192 | 0.999652 |
| Benzene+cycloprop-2-enylidene | 0.000322752 | 0.999975 | 0.000322752 | 0.999975 |
| PhCCH+CH3                     | 7.38194e-06 | 0.999982 | 7.38194e-06 | 0.999982 |
| C2H2+PhCH2                    | 6.11553e-06 | 0.999989 | 6.11553e-06 | 0.999989 |
| PhCCCH3+H                     | 4.48334e-06 | 0.999993 | 4.48334e-06 | 0.999993 |
| Ph+MeAc                       | 3.92459e-06 | 0.999997 | 3.92459e-06 | 0.999997 |
| rad67                         | 1.14122e-06 | 0.999998 | 1.14122e-06 | 0.999998 |
| rad35                         | 4.87362e-07 | 0.999999 | 4.87362e-07 | 0.999999 |
| Ph+Allene                     | 4.81641e-07 | 0.999999 | 4.81641e-07 | 0.999999 |
| Benzene+cycloprop-1-enylidene | 3.25084e-07 | 0.999999 | 3.25084e-07 | 0.999999 |
| PhCH2CCH+H                    | 7.25479e-08 | 0.999999 | 7.25479e-08 | 0.999999 |
| PAH7+H                        | 5.26263e-08 | 0.999999 | 5.26263e-08 | 0.999999 |
| rad39                         | 1.48191e-08 | 0.999999 | 1.48191e-08 | 0.999999 |
| rad37                         | 1.45757e-08 | 1.000000 | 1.45757e-08 | 1.000000 |
| rad30                         | 9.38702e-09 | 1.000000 | 9.38702e-09 | 1.000000 |
| PAH9+H                        | 8.06648e-10 | 1.000000 | 8.06648e-10 | 1.000000 |
| rad38                         | 3.86297e-10 | 1.000000 | 3.86297e-10 | 1.000000 |
| PAH10+CH3                     | 6.19064e-11 | 1.000000 | 6.19064e-11 | 1.000000 |
| rad60syn                      | 5.88324e-11 | 1.000000 | 5.88324e-11 | 1.000000 |
| PhcycC3H3_A+H                 | 5.47108e-11 | 1.000000 | 5.47108e-11 | 1.000000 |
| PAH3+H                        | 3.74113e-11 | 1.000000 | 3.74113e-11 | 1.000000 |
| rad60anti                     | 2.96857e-11 | 1.000000 | 2.96857e-11 | 1.000000 |
| rad46                         | 2.54475e-11 | 1.000000 | 2.54475e-11 | 1.000000 |
| rad59                         | 7.20068e-12 | 1.000000 | 7.20068e-12 | 1.000000 |
| rad54                         | 2.25392e-12 | 1.000000 | 2.25392e-12 | 1.000000 |
| rad43                         | 2.10782e-12 | 1.000000 | 2.10782e-12 | 1.000000 |
| Phenyl+cycC3H4                | 8.50545e-13 | 1.000000 | 0.000000    | 1.000000 |
| PhcycC3H3_B+H                 | 6.80482e-13 | 1.000000 | 6.80482e-13 | 1.000000 |
| rad62                         | 4.71505e-13 | 1.000000 | 4.71505e-13 | 1.000000 |
| rad50                         | 3.31266e-13 | 1.000000 | 3.31266e-13 | 1.000000 |
| rad70                         | 7.10727e-14 | 1.000000 | 7.10727e-14 | 1.000000 |
| PAH1+H                        | 3.63163e-14 | 1.000000 | 3.63163e-14 | 1.000000 |
| rad55                         | 3.14580e-14 | 1.000000 | 3.14580e-14 | 1.000000 |
| rad52                         | 3.51289e-15 | 1.000000 | 3.51289e-15 | 1.000000 |
| rad58                         | 2.35637e-15 | 1.000000 | 2.35637e-15 | 1.000000 |
| rad34                         | 2.03779e-15 | 1.000000 | 2.03779e-15 | 1.000000 |
| rad51                         | 1.58177e-15 | 1.000000 | 1.58177e-15 | 1.000000 |
| rad41                         | 5.40331e-16 | 1.000000 | 5.40331e-16 | 1.000000 |
| rad42                         | 3.27191e-16 | 1.000000 | 3.27191e-16 | 1.000000 |
| rad65                         | 4.07884e-17 | 1.000000 | 4.07884e-17 | 1.000000 |
| rad53                         | 7.54386e-18 | 1.000000 | 7.54386e-18 | 1.000000 |
| rad64                         | 2.25729e-18 | 1.000000 | 2.25729e-18 | 1.000000 |
| rad61                         | 5.84088e-19 | 1.000000 | 5.84088e-19 | 1.000000 |
| rad56                         | 4.57232e-20 | 1.000000 | 4.57232e-20 | 1.000000 |
| rad68syn                      | 5.68636e-21 | 1.000000 | 5.68636e-21 | 1.000000 |
| rad68anti                     | 4.27665e-21 | 1.000000 | 4.27665e-21 | 1.000000 |
| rad40syn                      | 6.78314e-23 | 1.000000 | 6.78314e-23 | 1.000000 |

|           |             |          |             |          |
|-----------|-------------|----------|-------------|----------|
| rad40anti | 5.41986e-23 | 1.000000 | 5.41986e-23 | 1.000000 |
| PAH8+H    | 1.13224e-23 | 1.000000 | 1.13224e-23 | 1.000000 |
| rad73     | 2.68346e-24 | 1.000000 | 2.68346e-24 | 1.000000 |
| rad71     | 2.20097e-26 | 1.000000 | 2.20097e-26 | 1.000000 |
| rad19anti | 2.07742e-31 | 1.000000 | 2.07742e-31 | 1.000000 |
| rad2      | 5.75394e-33 | 1.000000 | 5.75394e-33 | 1.000000 |
| rad6      | 5.21897e-33 | 1.000000 | 5.21897e-33 | 1.000000 |
| rad47     | 1.03946e-33 | 1.000000 | 1.03946e-33 | 1.000000 |
| rad1      | 4.04817e-34 | 1.000000 | 4.04817e-34 | 1.000000 |
| rad26     | 2.65765e-34 | 1.000000 | 2.65765e-34 | 1.000000 |
| rad10     | 2.18380e-34 | 1.000000 | 2.18380e-34 | 1.000000 |
| rad28     | 6.05594e-35 | 1.000000 | 6.05594e-35 | 1.000000 |
| rad3      | 5.05207e-35 | 1.000000 | 5.05207e-35 | 1.000000 |
| rad4      | 2.62484e-35 | 1.000000 | 2.62484e-35 | 1.000000 |
| rad31     | 4.04869e-37 | 1.000000 | 4.04869e-37 | 1.000000 |
| rad7      | 3.89591e-37 | 1.000000 | 3.89591e-37 | 1.000000 |
| rad14     | 2.64884e-37 | 1.000000 | 2.64884e-37 | 1.000000 |
| rad25     | 1.73500e-37 | 1.000000 | 1.73500e-37 | 1.000000 |
| rad11     | 9.30564e-38 | 1.000000 | 9.30564e-38 | 1.000000 |
| rad27     | 4.23137e-38 | 1.000000 | 4.23137e-38 | 1.000000 |
| rad9      | 3.42568e-38 | 1.000000 | 3.42568e-38 | 1.000000 |
| rad13     | 2.20838e-39 | 1.000000 | 2.20838e-39 | 1.000000 |
| rad19syn  | 4.33470e-40 | 1.000000 | 4.33470e-40 | 1.000000 |
| rad5      | 2.46350e-41 | 1.000000 | 2.46350e-41 | 1.000000 |
| rad15     | 1.52826e-41 | 1.000000 | 1.52826e-41 | 1.000000 |
| rad33     | 1.36100e-41 | 1.000000 | 1.36100e-41 | 1.000000 |
| rad23     | 9.41242e-43 | 1.000000 | 9.41242e-43 | 1.000000 |
| rad20     | 1.44668e-43 | 1.000000 | 1.44668e-43 | 1.000000 |
| rad21     | 1.35552e-43 | 1.000000 | 1.35552e-43 | 1.000000 |
| rad12     | 9.35278e-44 | 1.000000 | 9.35278e-44 | 1.000000 |
| rad45     | 1.94783e-44 | 1.000000 | 1.94783e-44 | 1.000000 |
| rad36     | 1.22880e-45 | 1.000000 | 1.22880e-45 | 1.000000 |
| rad18     | 3.25290e-46 | 1.000000 | 3.25290e-46 | 1.000000 |
| rad24     | 3.19416e-48 | 1.000000 | 3.19416e-48 | 1.000000 |
| rad22     | 1.38840e-48 | 1.000000 | 1.38840e-48 | 1.000000 |
| rad8      | 1.31971e-64 | 1.000000 | 1.31971e-64 | 1.000000 |

0.100000000E-07 Pa, 250.000000 K

| Rate constant             | True (fraction)        | Effective (fraction)   |
|---------------------------|------------------------|------------------------|
| Total                     | 2.71048e-14 (1.00 )    | 2.71048e-14 (1.00 )    |
| Formation of rad19        | 2.70930e-14 (1.000 )   | 2.70930e-14 (1.000 )   |
| H-abstraction to cyc2enyl | 1.17991e-17 (0.000435) | 1.17991e-17 (0.000435) |
| H-abstraction to cyc1enyl | 1.59554e-20 (5.89e-07) | 1.59554e-20 (5.89e-07) |

| species                       | PYtrue      | Cumul    | PYeffective | Cumul    |
|-------------------------------|-------------|----------|-------------|----------|
| Indene+H                      | 0.999107    | 0.999107 | 0.999107    | 0.999107 |
| Benzene+cycloprop-2-enylidene | 0.000435312 | 0.999543 | 0.000435312 | 0.999543 |
| PhCHCCH2+H                    | 0.000431584 | 0.999974 | 0.000431584 | 0.999974 |
| PhCCH+CH3                     | 7.75719e-06 | 0.999982 | 7.75719e-06 | 0.999982 |
| C2H2+PhCH2                    | 6.51326e-06 | 0.999988 | 6.51326e-06 | 0.999988 |
| PhCCCH3+H                     | 4.74360e-06 | 0.999993 | 4.74360e-06 | 0.999993 |
| Ph+MeAc                       | 4.20682e-06 | 0.999997 | 4.20682e-06 | 0.999997 |
| rad67                         | 1.22017e-06 | 0.999999 | 1.22017e-06 | 0.999999 |
| Benzene+cycloprop-1-enylidene | 5.88656e-07 | 0.999999 | 5.88656e-07 | 0.999999 |
| Ph+Allene                     | 5.31474e-07 | 1.000000 | 5.31474e-07 | 1.000000 |
| rad35                         | 5.19665e-07 | 1.000000 | 5.19665e-07 | 1.000000 |
| PhCH2CCH+H                    | 8.14215e-08 | 1.000000 | 8.14215e-08 | 1.000000 |
| PAH7+H                        | 5.71717e-08 | 1.000000 | 5.71717e-08 | 1.000000 |
| rad39                         | 1.60894e-08 | 1.000000 | 1.60894e-08 | 1.000000 |
| rad37                         | 1.59138e-08 | 1.000000 | 1.59138e-08 | 1.000000 |
| rad30                         | 1.00427e-08 | 1.000000 | 1.00427e-08 | 1.000000 |
| PAH9+H                        | 8.83301e-10 | 1.000000 | 8.83301e-10 | 1.000000 |
| rad38                         | 4.27984e-10 | 1.000000 | 4.27984e-10 | 1.000000 |
| PAH10+CH3                     | 7.44048e-11 | 1.000000 | 7.44048e-11 | 1.000000 |
| PhcycC3H3_A+H                 | 7.30900e-11 | 1.000000 | 7.30900e-11 | 1.000000 |
| rad60syn                      | 6.48407e-11 | 1.000000 | 6.48407e-11 | 1.000000 |
| PAH3+H                        | 4.28259e-11 | 1.000000 | 4.28259e-11 | 1.000000 |
| rad60anti                     | 3.28040e-11 | 1.000000 | 3.28040e-11 | 1.000000 |
| rad46                         | 2.83782e-11 | 1.000000 | 2.83782e-11 | 1.000000 |
| rad59                         | 8.18974e-12 | 1.000000 | 8.18974e-12 | 1.000000 |
| rad54                         | 2.70728e-12 | 1.000000 | 2.70728e-12 | 1.000000 |
| rad43                         | 2.46610e-12 | 1.000000 | 2.46610e-12 | 1.000000 |
| Phenyl+cycC3H4                | 1.23952e-12 | 1.000000 | 0.000000    | 1.000000 |
| PhcycC3H3_B+H                 | 1.09005e-12 | 1.000000 | 1.09005e-12 | 1.000000 |
| rad62                         | 5.51586e-13 | 1.000000 | 5.51586e-13 | 1.000000 |
| rad50                         | 3.90700e-13 | 1.000000 | 3.90700e-13 | 1.000000 |
| rad70                         | 8.95708e-14 | 1.000000 | 8.95708e-14 | 1.000000 |

|           |             |         |             |         |
|-----------|-------------|---------|-------------|---------|
| PAH1+H    | 4.84545e-14 | 1.00000 | 4.84545e-14 | 1.00000 |
| rad55     | 3.96080e-14 | 1.00000 | 3.96080e-14 | 1.00000 |
| rad52     | 4.31279e-15 | 1.00000 | 4.31279e-15 | 1.00000 |
| rad58     | 3.03881e-15 | 1.00000 | 3.03881e-15 | 1.00000 |
| rad34     | 2.73087e-15 | 1.00000 | 2.73087e-15 | 1.00000 |
| rad51     | 2.03107e-15 | 1.00000 | 2.03107e-15 | 1.00000 |
| rad41     | 7.39638e-16 | 1.00000 | 7.39638e-16 | 1.00000 |
| rad42     | 4.36203e-16 | 1.00000 | 4.36203e-16 | 1.00000 |
| rad65     | 5.31796e-17 | 1.00000 | 5.31796e-17 | 1.00000 |
| rad53     | 1.22797e-17 | 1.00000 | 1.22797e-17 | 1.00000 |
| rad64     | 3.85188e-18 | 1.00000 | 3.85188e-18 | 1.00000 |
| rad61     | 1.15688e-18 | 1.00000 | 1.15688e-18 | 1.00000 |
| rad56     | 9.65553e-20 | 1.00000 | 9.65553e-20 | 1.00000 |
| rad68syn  | 1.22760e-20 | 1.00000 | 1.22760e-20 | 1.00000 |
| rad68anti | 9.17629e-21 | 1.00000 | 9.17629e-21 | 1.00000 |
| rad40syn  | 1.79832e-22 | 1.00000 | 1.79832e-22 | 1.00000 |
| rad40anti | 1.43402e-22 | 1.00000 | 1.43402e-22 | 1.00000 |
| PAH8+H    | 3.45930e-23 | 1.00000 | 3.45930e-23 | 1.00000 |
| rad73     | 7.15481e-24 | 1.00000 | 7.15481e-24 | 1.00000 |
| rad71     | 7.13356e-26 | 1.00000 | 7.13356e-26 | 1.00000 |
| rad19anti | 7.31047e-31 | 1.00000 | 7.31047e-31 | 1.00000 |
| rad6      | 1.94540e-32 | 1.00000 | 1.94540e-32 | 1.00000 |
| rad2      | 1.36529e-32 | 1.00000 | 1.36529e-32 | 1.00000 |
| rad47     | 1.18402e-33 | 1.00000 | 1.18402e-33 | 1.00000 |
| rad1      | 9.71486e-34 | 1.00000 | 9.71486e-34 | 1.00000 |
| rad10     | 5.26647e-34 | 1.00000 | 5.26647e-34 | 1.00000 |
| rad26     | 2.55249e-34 | 1.00000 | 2.55249e-34 | 1.00000 |
| rad3      | 9.94285e-35 | 1.00000 | 9.94285e-35 | 1.00000 |
| rad28     | 5.80584e-35 | 1.00000 | 5.80584e-35 | 1.00000 |
| rad4      | 5.18235e-35 | 1.00000 | 5.18235e-35 | 1.00000 |
| rad7      | 1.45398e-36 | 1.00000 | 1.45398e-36 | 1.00000 |
| rad31     | 1.15495e-36 | 1.00000 | 1.15495e-36 | 1.00000 |
| rad11     | 3.42005e-37 | 1.00000 | 3.42005e-37 | 1.00000 |
| rad14     | 2.76022e-37 | 1.00000 | 2.76022e-37 | 1.00000 |
| rad25     | 1.84993e-37 | 1.00000 | 1.84993e-37 | 1.00000 |
| rad9      | 5.39927e-38 | 1.00000 | 5.39927e-38 | 1.00000 |
| rad27     | 4.57823e-38 | 1.00000 | 4.57823e-38 | 1.00000 |
| rad13     | 8.26263e-39 | 1.00000 | 8.26263e-39 | 1.00000 |
| rad19syn  | 1.76219e-39 | 1.00000 | 1.76219e-39 | 1.00000 |
| rad33     | 2.62884e-41 | 1.00000 | 2.62884e-41 | 1.00000 |
| rad15     | 2.41400e-41 | 1.00000 | 2.41400e-41 | 1.00000 |
| rad5      | 2.39657e-41 | 1.00000 | 2.39657e-41 | 1.00000 |
| rad23     | 4.56319e-42 | 1.00000 | 4.56319e-42 | 1.00000 |
| rad20     | 1.87591e-43 | 1.00000 | 1.87591e-43 | 1.00000 |
| rad21     | 1.78281e-43 | 1.00000 | 1.78281e-43 | 1.00000 |
| rad12     | 1.73973e-43 | 1.00000 | 1.73973e-43 | 1.00000 |
| rad45     | 1.71795e-43 | 1.00000 | 1.71795e-43 | 1.00000 |
| rad36     | 1.08956e-44 | 1.00000 | 1.08956e-44 | 1.00000 |
| rad18     | 3.66838e-46 | 1.00000 | 3.66838e-46 | 1.00000 |
| rad24     | 5.14891e-48 | 1.00000 | 5.14891e-48 | 1.00000 |
| rad22     | 3.66940e-48 | 1.00000 | 3.66940e-48 | 1.00000 |
| rad8      | 2.45880e-64 | 1.00000 | 2.45880e-64 | 1.00000 |

0.100000000E-07 Pa, 260.000000 K

| Rate constant             | True (fraction)        | Effective (fraction)   |
|---------------------------|------------------------|------------------------|
| Total                     | 2.97464e-14 (1.00)     | 2.97464e-14 (1.00)     |
| Formation of rad19        | 2.97293e-14 (0.999)    | 2.97293e-14 (0.999)    |
| H-abstraction to cyc2enyl | 1.70236e-17 (0.000572) | 1.70236e-17 (0.000572) |
| H-abstraction to cyc1enyl | 3.02186e-20 (1.02e-06) | 3.02186e-20 (1.02e-06) |

| species                       | PYtrue      | Cumul    | PYeffective | Cumul    |
|-------------------------------|-------------|----------|-------------|----------|
| Indene+H                      | 0.998946    | 0.998946 | 0.998946    | 0.998946 |
| Benzene+cycloprop-2-enylidene | 0.000572291 | 0.999518 | 0.000572291 | 0.999518 |
| PhCHCCH2+H                    | 0.000453848 | 0.999972 | 0.000453848 | 0.999972 |
| PhCCH+CH3                     | 8.16530e-06 | 0.999980 | 8.16530e-06 | 0.999980 |
| C2H2+PhCH2                    | 6.95321e-06 | 0.999987 | 6.95321e-06 | 0.999987 |
| PhCCCH3+H                     | 5.02932e-06 | 0.999992 | 5.02932e-06 | 0.999992 |
| Ph+MeAc                       | 4.52059e-06 | 0.999997 | 4.52059e-06 | 0.999997 |
| rad67                         | 1.30786e-06 | 0.999998 | 1.30786e-06 | 0.999998 |
| Benzene+cycloprop-1-enylidene | 1.01588e-06 | 0.999999 | 1.01588e-06 | 0.999999 |
| Ph+Allene                     | 5.88618e-07 | 1.000000 | 5.88618e-07 | 1.000000 |
| rad35                         | 5.55458e-07 | 1.000000 | 5.55458e-07 | 1.000000 |
| PhCH2CCH+H                    | 9.17637e-08 | 1.000000 | 9.17637e-08 | 1.000000 |
| PAH7+H                        | 6.23016e-08 | 1.000000 | 6.23016e-08 | 1.000000 |
| rad39                         | 1.75209e-08 | 1.000000 | 1.75209e-08 | 1.000000 |
| rad37                         | 1.74317e-08 | 1.000000 | 1.74317e-08 | 1.000000 |
| rad30                         | 1.07732e-08 | 1.000000 | 1.07732e-08 | 1.000000 |

|                |             |         |             |         |
|----------------|-------------|---------|-------------|---------|
| PAH9+H         | 9.70823e-10 | 1.00000 | 9.70823e-10 | 1.00000 |
| rad38          | 4.76210e-10 | 1.00000 | 4.76210e-10 | 1.00000 |
| PhcycC3H3_A+H  | 9.76900e-11 | 1.00000 | 9.76900e-11 | 1.00000 |
| PAH10+CH3      | 8.98996e-11 | 1.00000 | 8.98996e-11 | 1.00000 |
| rad60syn       | 7.17361e-11 | 1.00000 | 7.17361e-11 | 1.00000 |
| PAH3+H         | 4.92719e-11 | 1.00000 | 4.92719e-11 | 1.00000 |
| rad60anti      | 3.63918e-11 | 1.00000 | 3.63918e-11 | 1.00000 |
| rad46          | 3.17862e-11 | 1.00000 | 3.17862e-11 | 1.00000 |
| rad59          | 9.35934e-12 | 1.00000 | 9.35934e-12 | 1.00000 |
| rad54          | 3.26922e-12 | 1.00000 | 3.26922e-12 | 1.00000 |
| rad43          | 2.89822e-12 | 1.00000 | 2.89822e-12 | 1.00000 |
| Phenyl+cycC3H4 | 1.79997e-12 | 1.00000 | 0.00000     | 1.00000 |
| PhcycC3H3_B+H  | 1.72357e-12 | 1.00000 | 1.72357e-12 | 1.00000 |
| rad62          | 6.47858e-13 | 1.00000 | 6.47858e-13 | 1.00000 |
| rad50          | 4.63657e-13 | 1.00000 | 4.63657e-13 | 1.00000 |
| rad70          | 1.13462e-13 | 1.00000 | 1.13462e-13 | 1.00000 |
| PAH1+H         | 6.48747e-14 | 1.00000 | 6.48747e-14 | 1.00000 |
| rad55          | 5.01162e-14 | 1.00000 | 5.01162e-14 | 1.00000 |
| rad52          | 5.33110e-15 | 1.00000 | 5.33110e-15 | 1.00000 |
| rad58          | 3.93954e-15 | 1.00000 | 3.93954e-15 | 1.00000 |
| rad34          | 3.67253e-15 | 1.00000 | 3.67253e-15 | 1.00000 |
| rad51          | 2.62615e-15 | 1.00000 | 2.62615e-15 | 1.00000 |
| rad41          | 1.01308e-15 | 1.00000 | 1.01308e-15 | 1.00000 |
| rad42          | 5.82033e-16 | 1.00000 | 5.82033e-16 | 1.00000 |
| rad65          | 6.97793e-17 | 1.00000 | 6.97793e-17 | 1.00000 |
| rad53          | 1.97860e-17 | 1.00000 | 1.97860e-17 | 1.00000 |
| rad64          | 6.46999e-18 | 1.00000 | 6.46999e-18 | 1.00000 |
| rad61          | 2.22252e-18 | 1.00000 | 2.22252e-18 | 1.00000 |
| rad56          | 1.96583e-19 | 1.00000 | 1.96583e-19 | 1.00000 |
| rad68syn       | 2.54704e-20 | 1.00000 | 2.54704e-20 | 1.00000 |
| rad68anti      | 1.89312e-20 | 1.00000 | 1.89312e-20 | 1.00000 |
| rad40syn       | 4.46797e-22 | 1.00000 | 4.46797e-22 | 1.00000 |
| rad40anti      | 3.55555e-22 | 1.00000 | 3.55555e-22 | 1.00000 |
| PAH8+H         | 9.71820e-23 | 1.00000 | 9.71820e-23 | 1.00000 |
| rad73          | 1.79367e-23 | 1.00000 | 1.79367e-23 | 1.00000 |
| rad71          | 2.10958e-25 | 1.00000 | 2.10958e-25 | 1.00000 |
| rad19anti      | 2.63449e-30 | 1.00000 | 2.63449e-30 | 1.00000 |
| rad6           | 7.58033e-32 | 1.00000 | 7.58033e-32 | 1.00000 |
| rad2           | 1.92809e-32 | 1.00000 | 1.92809e-32 | 1.00000 |
| rad1           | 1.38907e-33 | 1.00000 | 1.38907e-33 | 1.00000 |
| rad47          | 1.37151e-33 | 1.00000 | 1.37151e-33 | 1.00000 |
| rad10          | 1.05900e-33 | 1.00000 | 1.05900e-33 | 1.00000 |
| rad26          | 2.47960e-34 | 1.00000 | 2.47960e-34 | 1.00000 |
| rad3           | 1.26306e-34 | 1.00000 | 1.26306e-34 | 1.00000 |
| rad4           | 6.60580e-35 | 1.00000 | 6.60580e-35 | 1.00000 |
| rad28          | 5.71591e-35 | 1.00000 | 5.71591e-35 | 1.00000 |
| rad7           | 5.67101e-36 | 1.00000 | 5.67101e-36 | 1.00000 |
| rad31          | 3.40261e-36 | 1.00000 | 3.40261e-36 | 1.00000 |
| rad11          | 1.31817e-36 | 1.00000 | 1.31817e-36 | 1.00000 |
| rad14          | 2.89083e-37 | 1.00000 | 2.89083e-37 | 1.00000 |
| rad25          | 1.98384e-37 | 1.00000 | 1.98384e-37 | 1.00000 |
| rad9           | 8.70242e-38 | 1.00000 | 8.70242e-38 | 1.00000 |
| rad27          | 4.98547e-38 | 1.00000 | 4.98547e-38 | 1.00000 |
| rad13          | 3.23198e-38 | 1.00000 | 3.23198e-38 | 1.00000 |
| rad19syn       | 7.46104e-39 | 1.00000 | 7.46104e-39 | 1.00000 |
| rad33          | 7.00059e-41 | 1.00000 | 7.00059e-41 | 1.00000 |
| rad15          | 3.89979e-41 | 1.00000 | 3.89979e-41 | 1.00000 |
| rad23          | 2.34723e-41 | 1.00000 | 2.34723e-41 | 1.00000 |
| rad5           | 2.33544e-41 | 1.00000 | 2.33544e-41 | 1.00000 |
| rad45          | 9.51842e-43 | 1.00000 | 9.51842e-43 | 1.00000 |
| rad12          | 3.32841e-43 | 1.00000 | 3.32841e-43 | 1.00000 |
| rad20          | 2.46360e-43 | 1.00000 | 2.46360e-43 | 1.00000 |
| rad21          | 2.37644e-43 | 1.00000 | 2.37644e-43 | 1.00000 |
| rad36          | 6.07160e-44 | 1.00000 | 6.07160e-44 | 1.00000 |
| rad18          | 4.16390e-46 | 1.00000 | 4.16390e-46 | 1.00000 |
| rad22          | 1.32192e-47 | 1.00000 | 1.32192e-47 | 1.00000 |
| rad24          | 8.48188e-48 | 1.00000 | 8.48188e-48 | 1.00000 |
| rad8           | 4.68586e-64 | 1.00000 | 4.68586e-64 | 1.00000 |

0.100000000E-07 Pa, 270.000000 K

| Rate constant             | True (fraction)        | Effective (fraction)   |
|---------------------------|------------------------|------------------------|
| Total                     | 3.24655e-14 (1.00)     | 3.24655e-14 (1.00)     |
| Formation of rad19        | 3.24415e-14 (0.999)    | 3.24415e-14 (0.999)    |
| H-abstraction to cyc2enyl | 2.38790e-17 (0.000736) | 2.38790e-17 (0.000736) |
| H-abstraction to cyclenyl | 5.45397e-20 (1.68e-06) | 5.45397e-20 (1.68e-06) |

| species | PYtrue | Cumul | PYeffective | Cumul |
|---------|--------|-------|-------------|-------|
| -----   |        |       |             |       |

|                               |             |          |             |          |
|-------------------------------|-------------|----------|-------------|----------|
| Indene+H                      | 0.998755    | 0.998755 | 0.998755    | 0.998755 |
| Benzene+cycloprop-2-enylidene | 0.000735519 | 0.999491 | 0.000735519 | 0.999491 |
| PhCHCCH2+H                    | 0.000478146 | 0.999969 | 0.000478146 | 0.999969 |
| PhCCH+CH3                     | 8.60880e-06 | 0.999977 | 8.60880e-06 | 0.999977 |
| C2H2+PhCH2                    | 7.43973e-06 | 0.999985 | 7.43973e-06 | 0.999985 |
| PhCCCH3+H                     | 5.34286e-06 | 0.999990 | 5.34286e-06 | 0.999990 |
| Ph+MeAc                       | 4.86938e-06 | 0.999995 | 4.86938e-06 | 0.999995 |
| Benzene+cycloprop-1-enylidene | 1.67993e-06 | 0.999997 | 1.67993e-06 | 0.999997 |
| rad67                         | 1.40525e-06 | 0.999998 | 1.40525e-06 | 0.999998 |
| Ph+Allene                     | 6.54187e-07 | 0.999999 | 6.54187e-07 | 0.999999 |
| rad35                         | 5.95116e-07 | 0.999999 | 5.95116e-07 | 0.999999 |
| PhCH2CCH+H                    | 1.03828e-07 | 1.000000 | 1.03828e-07 | 1.000000 |
| PAH7+H                        | 6.80924e-08 | 1.000000 | 6.80924e-08 | 1.000000 |
| rad37                         | 1.91542e-08 | 1.000000 | 1.91542e-08 | 1.000000 |
| rad39                         | 1.91343e-08 | 1.000000 | 1.91343e-08 | 1.000000 |
| rad30                         | 1.15872e-08 | 1.000000 | 1.15872e-08 | 1.000000 |
| PAH9+H                        | 1.07084e-09 | 1.000000 | 1.07084e-09 | 1.000000 |
| rad38                         | 5.32069e-10 | 1.000000 | 5.32069e-10 | 1.000000 |
| PhcycC3H3_A+H                 | 1.30538e-10 | 1.000000 | 1.30538e-10 | 1.000000 |
| PAH10+CH3                     | 1.09134e-10 | 1.000000 | 1.09134e-10 | 1.000000 |
| rad60syn                      | 7.96566e-11 | 1.000000 | 7.96566e-11 | 1.000000 |
| PAH3+H                        | 5.69580e-11 | 1.000000 | 5.69580e-11 | 1.000000 |
| rad60anti                     | 4.05238e-11 | 1.000000 | 4.05238e-11 | 1.000000 |
| rad46                         | 3.57543e-11 | 1.000000 | 3.57543e-11 | 1.000000 |
| rad59                         | 1.07444e-11 | 1.000000 | 1.07444e-11 | 1.000000 |
| rad54                         | 3.96666e-12 | 1.000000 | 3.96666e-12 | 1.000000 |
| rad43                         | 3.41976e-12 | 1.000000 | 3.41976e-12 | 1.000000 |
| PhcycC3H3_B+H                 | 2.69151e-12 | 1.000000 | 2.69151e-12 | 1.000000 |
| Phenyl+cycC3H4                | 2.60320e-12 | 1.000000 | 0.000000    | 1.000000 |
| rad62                         | 7.63634e-13 | 1.000000 | 7.63634e-13 | 1.000000 |
| rad50                         | 5.53420e-13 | 1.000000 | 5.53420e-13 | 1.000000 |
| rad70                         | 1.44343e-13 | 1.000000 | 1.44343e-13 | 1.000000 |
| PAH1+H                        | 8.70739e-14 | 1.000000 | 8.70739e-14 | 1.000000 |
| rad55                         | 6.36740e-14 | 1.000000 | 6.36740e-14 | 1.000000 |
| rad52                         | 6.63065e-15 | 1.000000 | 6.63065e-15 | 1.000000 |
| rad58                         | 5.12944e-15 | 1.000000 | 5.12944e-15 | 1.000000 |
| rad34                         | 4.95119e-15 | 1.000000 | 4.95119e-15 | 1.000000 |
| rad51                         | 3.41605e-15 | 1.000000 | 3.41605e-15 | 1.000000 |
| rad41                         | 1.38732e-15 | 1.000000 | 1.38732e-15 | 1.000000 |
| rad42                         | 7.76679e-16 | 1.000000 | 7.76679e-16 | 1.000000 |
| rad65                         | 9.20538e-17 | 1.000000 | 9.20538e-17 | 1.000000 |
| rad53                         | 3.15550e-17 | 1.000000 | 3.15550e-17 | 1.000000 |
| rad64                         | 1.07030e-17 | 1.000000 | 1.07030e-17 | 1.000000 |
| rad61                         | 4.14942e-18 | 1.000000 | 4.14942e-18 | 1.000000 |
| rad56                         | 3.86758e-19 | 1.000000 | 3.86758e-19 | 1.000000 |
| rad68syn                      | 5.09279e-20 | 1.000000 | 5.09279e-20 | 1.000000 |
| rad68anti                     | 3.76574e-20 | 1.000000 | 3.76574e-20 | 1.000000 |
| rad40syn                      | 1.04541e-21 | 1.000000 | 1.04541e-21 | 1.000000 |
| rad40anti                     | 8.30243e-22 | 1.000000 | 8.30243e-22 | 1.000000 |
| PAH8+H                        | 2.52772e-22 | 1.000000 | 2.52772e-22 | 1.000000 |
| rad73                         | 4.24308e-23 | 1.000000 | 4.24308e-23 | 1.000000 |
| rad71                         | 5.73649e-25 | 1.000000 | 5.73649e-25 | 1.000000 |
| rad19anti                     | 9.66950e-30 | 1.000000 | 9.66950e-30 | 1.000000 |
| rad6                          | 3.00754e-31 | 1.000000 | 3.00754e-31 | 1.000000 |
| rad2                          | 5.46042e-32 | 1.000000 | 5.46042e-32 | 1.000000 |
| rad1                          | 3.98598e-33 | 1.000000 | 3.98598e-33 | 1.000000 |
| rad10                         | 2.80562e-33 | 1.000000 | 2.80562e-33 | 1.000000 |
| rad47                         | 1.61683e-33 | 1.000000 | 1.61683e-33 | 1.000000 |
| rad26                         | 2.46087e-34 | 1.000000 | 2.46087e-34 | 1.000000 |
| rad3                          | 1.86630e-34 | 1.000000 | 1.86630e-34 | 1.000000 |
| rad4                          | 9.79728e-35 | 1.000000 | 9.79728e-35 | 1.000000 |
| rad28                         | 5.97841e-35 | 1.000000 | 5.97841e-35 | 1.000000 |
| rad7                          | 2.25141e-35 | 1.000000 | 2.25141e-35 | 1.000000 |
| rad31                         | 1.03174e-35 | 1.000000 | 1.03174e-35 | 1.000000 |
| rad11                         | 5.17414e-36 | 1.000000 | 5.17414e-36 | 1.000000 |
| rad14                         | 3.04319e-37 | 1.000000 | 3.04319e-37 | 1.000000 |
| rad25                         | 2.13987e-37 | 1.000000 | 2.13987e-37 | 1.000000 |
| rad9                          | 1.43698e-37 | 1.000000 | 1.43698e-37 | 1.000000 |
| rad13                         | 1.28723e-37 | 1.000000 | 1.28723e-37 | 1.000000 |
| rad27                         | 5.46519e-38 | 1.000000 | 5.46519e-38 | 1.000000 |
| rad19syn                      | 3.27847e-38 | 1.000000 | 3.27847e-38 | 1.000000 |
| rad33                         | 2.34458e-40 | 1.000000 | 2.34458e-40 | 1.000000 |
| rad23                         | 1.27592e-40 | 1.000000 | 1.27592e-40 | 1.000000 |
| rad15                         | 6.45503e-41 | 1.000000 | 6.45503e-41 | 1.000000 |
| rad5                          | 2.27951e-41 | 1.000000 | 2.27951e-41 | 1.000000 |
| rad45                         | 5.55309e-42 | 1.000000 | 5.55309e-42 | 1.000000 |
| rad12                         | 6.55396e-43 | 1.000000 | 6.55396e-43 | 1.000000 |
| rad36                         | 3.56618e-43 | 1.000000 | 3.56618e-43 | 1.000000 |
| rad20                         | 3.27908e-43 | 1.000000 | 3.27908e-43 | 1.000000 |
| rad21                         | 3.21260e-43 | 1.000000 | 3.21260e-43 | 1.000000 |



|       |             |          |             |          |
|-------|-------------|----------|-------------|----------|
| rad18 | 4.76453e-46 | 1.000000 | 4.76453e-46 | 1.000000 |
| rad22 | 5.55240e-47 | 1.000000 | 5.55240e-47 | 1.000000 |
| rad24 | 1.42872e-47 | 1.000000 | 1.42872e-47 | 1.000000 |
| rad8  | 9.13967e-64 | 1.000000 | 9.13967e-64 | 1.000000 |

0.100000000E-07 Pa, 280.000000 K

```

=====
Rate constant      | True (fraction)      Effective (fraction)
-----
Total              | 3.52572e-14 (1.00   ) 3.52572e-14 (1.00   )
Formation of rad19| 3.52244e-14 (0.999   ) 3.52244e-14 (0.999   )
H-abstraction to cyc2enyl| 3.26639e-17 (0.000926) 3.26639e-17 (0.000926)
H-abstraction to cyclenyl| 9.42926e-20 (2.67e-06) 9.42926e-20 (2.67e-06)
=====
species            | PYtrue      Cumul      | PYeffective  Cumul
-----
Indene+H          | 0.998535    0.998535    | 0.998535     0.998535
Benzene+cycloprop-2-enylidene | 0.000926445 0.999462    | 0.000926445 0.999462
PhCHCCH2+H       | 0.000504654 0.999966    | 0.000504654 0.999966
PhCCH+CH3        | 9.09038e-06 0.999976    | 9.09038e-06 0.999976
C2H2+PhCH2      | 7.97755e-06 0.999984    | 7.97755e-06 0.999984
PhCCCH3+H        | 5.68676e-06 0.999989    | 5.68676e-06 0.999989
Ph+MeAc          | 5.25697e-06 0.999994    | 5.25697e-06 0.999994
Benzene+cycloprop-1-enylidene | 2.67442e-06 0.999997    | 2.67442e-06 0.999997
rad67            | 1.51340e-06 0.999999    | 1.51340e-06 0.999999
Ph+Allene        | 7.29448e-07 0.999999    | 7.29448e-07 0.999999
rad35            | 6.39046e-07 1.000000    | 6.39046e-07 1.000000
PhCH2CCH+H      | 1.17909e-07 1.000000    | 1.17909e-07 1.000000
PAH7+H          | 7.46290e-08 1.000000    | 7.46290e-08 1.000000
rad37            | 2.11094e-08 1.000000    | 2.11094e-08 1.000000
rad39            | 2.09522e-08 1.000000    | 2.09522e-08 1.000000
rad30            | 1.24940e-08 1.000000    | 1.24940e-08 1.000000
PAH9+H          | 1.18522e-09 1.000000    | 1.18522e-09 1.000000
rad38            | 5.96837e-10 1.000000    | 5.96837e-10 1.000000
PhcycC3H3_A+H   | 1.74264e-10 1.000000    | 1.74264e-10 1.000000
PAH10+CH3       | 1.33029e-10 1.000000    | 1.33029e-10 1.000000
rad60syn        | 8.87606e-11 1.000000    | 8.87606e-11 1.000000
PAH3+H          | 6.61334e-11 1.000000    | 6.61334e-11 1.000000
rad60anti       | 4.52857e-11 1.000000    | 4.52857e-11 1.000000
rad46            | 4.03796e-11 1.000000    | 4.03796e-11 1.000000
rad59            | 1.23862e-11 1.000000    | 1.23862e-11 1.000000
rad54            | 4.83285e-12 1.000000    | 4.83285e-12 1.000000
PhcycC3H3_B+H   | 4.15199e-12 1.000000    | 4.15199e-12 1.000000
rad43            | 4.04946e-12 1.000000    | 4.04946e-12 1.000000
Phenyl+cycC3H4 | 3.74742e-12 1.000000    | 0.000000     1.000000
rad62            | 9.02853e-13 1.000000    | 9.02853e-13 1.000000
rad50            | 6.64061e-13 1.000000    | 6.64061e-13 1.000000
rad70            | 1.84259e-13 1.000000    | 1.84259e-13 1.000000
PAH1+H          | 1.17039e-13 1.000000    | 1.17039e-13 1.000000
rad55            | 8.11651e-14 1.000000    | 8.11651e-14 1.000000
rad52            | 8.29198e-15 1.000000    | 8.29198e-15 1.000000
rad58            | 6.70136e-15 1.000000    | 6.70136e-15 1.000000
rad34            | 6.68467e-15 1.000000    | 6.68467e-15 1.000000
rad51            | 4.46577e-15 1.000000    | 4.46577e-15 1.000000
rad41            | 1.89783e-15 1.000000    | 1.89783e-15 1.000000
rad42            | 1.03572e-15 1.000000    | 1.03572e-15 1.000000
rad65            | 1.21961e-16 1.000000    | 1.21961e-16 1.000000
rad53            | 4.97919e-17 1.000000    | 4.97919e-17 1.000000
rad64            | 1.74396e-17 1.000000    | 1.74396e-17 1.000000
rad61            | 7.53772e-18 1.000000    | 7.53772e-18 1.000000
rad56            | 7.36384e-19 1.000000    | 7.36384e-19 1.000000
rad68syn        | 9.83169e-20 1.000000    | 9.83169e-20 1.000000
rad68anti       | 7.23595e-20 1.000000    | 7.23595e-20 1.000000
rad40syn        | 2.31284e-21 1.000000    | 2.31284e-21 1.000000
rad40anti       | 1.83329e-21 1.000000    | 1.83329e-21 1.000000
PAH8+H          | 6.12419e-22 1.000000    | 6.12419e-22 1.000000
rad73            | 9.50003e-23 1.000000    | 9.50003e-23 1.000000
rad71            | 1.44434e-24 1.000000    | 1.44434e-24 1.000000
rad19anti       | 3.59338e-29 1.000000    | 3.59338e-29 1.000000
rad6             | 1.19277e-30 1.000000    | 1.19277e-30 1.000000
rad2             | 1.12079e-31 1.000000    | 1.12079e-31 1.000000
rad1             | 8.29891e-33 1.000000    | 8.29891e-33 1.000000
rad10           | 6.06041e-33 1.000000    | 6.06041e-33 1.000000
rad47           | 1.94125e-33 1.000000    | 1.94125e-33 1.000000
rad3             | 4.54668e-34 1.000000    | 4.54668e-34 1.000000
rad26           | 2.54425e-34 1.000000    | 2.54425e-34 1.000000
rad4             | 2.39635e-34 1.000000    | 2.39635e-34 1.000000
rad7            | 8.93027e-35 1.000000    | 8.93027e-35 1.000000
rad28           | 7.09640e-35 1.000000    | 7.09640e-35 1.000000
rad31           | 3.20736e-35 1.000000    | 3.20736e-35 1.000000

```

|          |             |         |             |         |
|----------|-------------|---------|-------------|---------|
| rad11    | 2.02787e-35 | 1.00000 | 2.02787e-35 | 1.00000 |
| rad13    | 5.12409e-37 | 1.00000 | 5.12409e-37 | 1.00000 |
| rad14    | 3.22055e-37 | 1.00000 | 3.22055e-37 | 1.00000 |
| rad9     | 2.43954e-37 | 1.00000 | 2.43954e-37 | 1.00000 |
| rad25    | 2.32198e-37 | 1.00000 | 2.32198e-37 | 1.00000 |
| rad19syn | 1.48909e-37 | 1.00000 | 1.48909e-37 | 1.00000 |
| rad27    | 6.03356e-38 | 1.00000 | 6.03356e-38 | 1.00000 |
| rad33    | 8.66475e-40 | 1.00000 | 8.66475e-40 | 1.00000 |
| rad23    | 7.28741e-40 | 1.00000 | 7.28741e-40 | 1.00000 |
| rad15    | 1.09862e-40 | 1.00000 | 1.09862e-40 | 1.00000 |
| rad45    | 2.42248e-41 | 1.00000 | 2.42248e-41 | 1.00000 |
| rad5     | 2.22835e-41 | 1.00000 | 2.22835e-41 | 1.00000 |
| rad36    | 1.56649e-42 | 1.00000 | 1.56649e-42 | 1.00000 |
| rad12    | 1.32917e-42 | 1.00000 | 1.32917e-42 | 1.00000 |
| rad20    | 4.42995e-43 | 1.00000 | 4.42995e-43 | 1.00000 |
| rad21    | 4.40996e-43 | 1.00000 | 4.40996e-43 | 1.00000 |
| rad18    | 5.52308e-46 | 1.00000 | 5.52308e-46 | 1.00000 |
| rad22    | 2.51712e-46 | 1.00000 | 2.51712e-46 | 1.00000 |
| rad24    | 2.46243e-47 | 1.00000 | 2.46243e-47 | 1.00000 |
| rad8     | 1.82566e-63 | 1.00000 | 1.82566e-63 | 1.00000 |

0.100000000E-07 Pa, 290.00000 K

| Rate constant             | True (fraction)        | Effective (fraction)   |
|---------------------------|------------------------|------------------------|
| Total                     | 3.81171e-14 (1.00 )    | 3.81171e-14 (1.00 )    |
| Formation of rad19        | 3.80733e-14 (0.999 )   | 3.80733e-14 (0.999 )   |
| H-abstraction to cyc2enyl | 4.36868e-17 (0.00115 ) | 4.36868e-17 (0.00115 ) |
| H-abstraction to cyclenyl | 1.56861e-19 (4.12e-06) | 1.56861e-19 (4.12e-06) |

| species                       | PYtrue      | Cumul    | PYeffective | Cumul    |
|-------------------------------|-------------|----------|-------------|----------|
| Indene+H                      | 0.998282    | 0.998282 | 0.998282    | 0.998282 |
| Benzene+cycloprop-2-enylidene | 0.00114612  | 0.999429 | 0.00114612  | 0.999429 |
| PhCHCCH2+H                    | 0.000533552 | 0.999962 | 0.000533552 | 0.999962 |
| PhCCH+CH3                     | 9.61277e-06 | 0.999972 | 9.61277e-06 | 0.999972 |
| C2H2+PhCH2                    | 8.57172e-06 | 0.999980 | 8.57172e-06 | 0.999980 |
| PhCCCH3+H                     | 6.06370e-06 | 0.999986 | 6.06370e-06 | 0.999986 |
| Ph+MeAc                       | 5.68749e-06 | 0.999992 | 5.68749e-06 | 0.999992 |
| Benzene+cycloprop-1-enylidene | 4.11523e-06 | 0.999996 | 4.11523e-06 | 0.999996 |
| rad67                         | 1.63346e-06 | 0.999998 | 1.63346e-06 | 0.999998 |
| Ph+Allene                     | 8.15840e-07 | 0.999999 | 8.15840e-07 | 0.999999 |
| rad35                         | 6.87689e-07 | 0.999999 | 6.87689e-07 | 0.999999 |
| PhCH2CCH+H                    | 1.34349e-07 | 0.999999 | 1.34349e-07 | 0.999999 |
| PAH7+H                        | 8.20060e-08 | 0.999999 | 8.20060e-08 | 0.999999 |
| rad37                         | 2.33285e-08 | 1.000000 | 2.33285e-08 | 1.000000 |
| rad39                         | 2.30001e-08 | 1.000000 | 2.30001e-08 | 1.000000 |
| rad30                         | 1.35042e-08 | 1.000000 | 1.35042e-08 | 1.000000 |
| PAH9+H                        | 1.31607e-09 | 1.000000 | 1.31607e-09 | 1.000000 |
| rad38                         | 6.71988e-10 | 1.000000 | 6.71988e-10 | 1.000000 |
| PhcycC3H3_A+H                 | 2.32248e-10 | 1.000000 | 2.32248e-10 | 1.000000 |
| PAH10+CH3                     | 1.62717e-10 | 1.000000 | 1.62717e-10 | 1.000000 |
| rad60syn                      | 9.92285e-11 | 1.000000 | 9.92285e-11 | 1.000000 |
| PAH3+H                        | 7.70956e-11 | 1.000000 | 7.70956e-11 | 1.000000 |
| rad60anti                     | 5.07758e-11 | 1.000000 | 5.07758e-11 | 1.000000 |
| rad46                         | 4.57748e-11 | 1.000000 | 4.57748e-11 | 1.000000 |
| rad59                         | 1.43338e-11 | 1.000000 | 1.43338e-11 | 1.000000 |
| PhcycC3H3_B+H                 | 6.32701e-12 | 1.000000 | 6.32701e-12 | 1.000000 |
| rad54                         | 5.90859e-12 | 1.000000 | 5.90859e-12 | 1.000000 |
| Phenyl+cycC3H4                | 5.36584e-12 | 1.000000 | 0.000000    | 1.000000 |
| rad43                         | 4.80969e-12 | 1.000000 | 4.80969e-12 | 1.000000 |
| rad62                         | 1.07018e-12 | 1.000000 | 1.07018e-12 | 1.000000 |
| rad50                         | 8.00597e-13 | 1.000000 | 8.00597e-13 | 1.000000 |
| rad70                         | 2.35807e-13 | 1.000000 | 2.35807e-13 | 1.000000 |
| PAH1+H                        | 1.57377e-13 | 1.000000 | 1.57377e-13 | 1.000000 |
| rad55                         | 1.03709e-13 | 1.000000 | 1.03709e-13 | 1.000000 |
| rad52                         | 1.04176e-14 | 1.000000 | 1.04176e-14 | 1.000000 |
| rad34                         | 9.02825e-15 | 1.000000 | 9.02825e-15 | 1.000000 |
| rad58                         | 8.77577e-15 | 1.000000 | 8.77577e-15 | 1.000000 |
| rad51                         | 5.86071e-15 | 1.000000 | 5.86071e-15 | 1.000000 |
| rad41                         | 2.59126e-15 | 1.000000 | 2.59126e-15 | 1.000000 |
| rad42                         | 1.37914e-15 | 1.000000 | 1.37914e-15 | 1.000000 |
| rad65                         | 1.62088e-16 | 1.000000 | 1.62088e-16 | 1.000000 |
| rad53                         | 7.76876e-17 | 1.000000 | 7.76876e-17 | 1.000000 |
| rad64                         | 2.79837e-17 | 1.000000 | 2.79837e-17 | 1.000000 |
| rad61                         | 1.33318e-17 | 1.000000 | 1.33318e-17 | 1.000000 |
| rad56                         | 1.35816e-18 | 1.000000 | 1.35816e-18 | 1.000000 |
| rad68syn                      | 1.83484e-19 | 1.000000 | 1.83484e-19 | 1.000000 |
| rad68anti                     | 1.34481e-19 | 1.000000 | 1.34481e-19 | 1.000000 |
| rad40syn                      | 4.85494e-21 | 1.000000 | 4.85494e-21 | 1.000000 |

|           |             |          |             |          |
|-----------|-------------|----------|-------------|----------|
| rad40anti | 3.84148e-21 | 1.000000 | 3.84148e-21 | 1.000000 |
| PAH8+H    | 1.38965e-21 | 1.000000 | 1.38965e-21 | 1.000000 |
| rad73     | 2.01863e-22 | 1.000000 | 2.01863e-22 | 1.000000 |
| rad71     | 3.38824e-24 | 1.000000 | 3.38824e-24 | 1.000000 |
| rad19anti | 1.34354e-28 | 1.000000 | 1.34354e-28 | 1.000000 |
| rad6      | 4.67354e-30 | 1.000000 | 4.67354e-30 | 1.000000 |
| rad2      | 1.71293e-31 | 1.000000 | 1.71293e-31 | 1.000000 |
| rad10     | 1.36022e-32 | 1.000000 | 1.36022e-32 | 1.000000 |
| rad1      | 1.28751e-32 | 1.000000 | 1.28751e-32 | 1.000000 |
| rad47     | 2.37555e-33 | 1.000000 | 2.37555e-33 | 1.000000 |
| rad3      | 1.24465e-33 | 1.000000 | 1.24465e-33 | 1.000000 |
| rad4      | 6.58845e-34 | 1.000000 | 6.58845e-34 | 1.000000 |
| rad7      | 3.49747e-34 | 1.000000 | 3.49747e-34 | 1.000000 |
| rad26     | 2.83490e-34 | 1.000000 | 2.83490e-34 | 1.000000 |
| rad28     | 1.03797e-34 | 1.000000 | 1.03797e-34 | 1.000000 |
| rad31     | 1.01787e-34 | 1.000000 | 1.01787e-34 | 1.000000 |
| rad11     | 7.83910e-35 | 1.000000 | 7.83910e-35 | 1.000000 |
| rad13     | 2.01482e-36 | 1.000000 | 2.01482e-36 | 1.000000 |
| rad19syn  | 6.95957e-37 | 1.000000 | 6.95957e-37 | 1.000000 |
| rad9      | 4.28889e-37 | 1.000000 | 4.28889e-37 | 1.000000 |
| rad14     | 3.42713e-37 | 1.000000 | 3.42713e-37 | 1.000000 |
| rad25     | 2.53509e-37 | 1.000000 | 2.53509e-37 | 1.000000 |
| rad27     | 6.71303e-38 | 1.000000 | 6.71303e-38 | 1.000000 |
| rad23     | 4.34440e-39 | 1.000000 | 4.34440e-39 | 1.000000 |
| rad33     | 3.27656e-39 | 1.000000 | 3.27656e-39 | 1.000000 |
| rad15     | 1.93657e-40 | 1.000000 | 1.93657e-40 | 1.000000 |
| rad45     | 1.88472e-40 | 1.000000 | 1.88472e-40 | 1.000000 |
| rad5      | 2.18162e-41 | 1.000000 | 2.18162e-41 | 1.000000 |
| rad36     | 1.22801e-41 | 1.000000 | 1.22801e-41 | 1.000000 |
| rad12     | 2.77822e-42 | 1.000000 | 2.77822e-42 | 1.000000 |
| rad21     | 6.16326e-43 | 1.000000 | 6.16326e-43 | 1.000000 |
| rad20     | 6.09482e-43 | 1.000000 | 6.09482e-43 | 1.000000 |
| rad22     | 1.19707e-45 | 1.000000 | 1.19707e-45 | 1.000000 |
| rad18     | 6.58535e-46 | 1.000000 | 6.58535e-46 | 1.000000 |
| rad24     | 4.34563e-47 | 1.000000 | 4.34563e-47 | 1.000000 |
| rad8      | 3.73727e-63 | 1.000000 | 3.73727e-63 | 1.000000 |

0.100000000E-07 Pa, 300.000000 K

| Rate constant             | True (fraction)        | Effective (fraction)   |
|---------------------------|------------------------|------------------------|
| Total                     | 5.34809e-14 (1.00 )    | 5.34809e-14 (1.00 )    |
| Formation of rad19        | 5.34010e-14 (0.999 )   | 5.34010e-14 (0.999 )   |
| H-abstraction to cyc2enyl | 7.95823e-17 (0.00149 ) | 7.95823e-17 (0.00149 ) |
| H-abstraction to cyc1enyl | 3.44981e-19 (6.45e-06) | 3.44981e-19 (6.45e-06) |

| species                       | PYtrue      | Cumul    | PYeffective | Cumul    |
|-------------------------------|-------------|----------|-------------|----------|
| Indene+H                      | 0.997939    | 0.997939 | 0.997939    | 0.997939 |
| Benzene+cycloprop-2-enylidene | 0.00148805  | 0.999427 | 0.00148805  | 0.999427 |
| PhCHCCH2+H                    | 0.000529814 | 0.999957 | 0.000529814 | 0.999957 |
| PhCCH+CH3                     | 1.04615e-05 | 0.999968 | 1.04615e-05 | 0.999968 |
| C2H2+PhCH2                    | 9.96265e-06 | 0.999978 | 9.96265e-06 | 0.999978 |
| Benzene+cycloprop-1-enylidene | 6.45054e-06 | 0.999984 | 6.45054e-06 | 0.999984 |
| PhCCH3+H                      | 6.36715e-06 | 0.999990 | 6.36715e-06 | 0.999990 |
| Ph+MeAc                       | 5.99826e-06 | 0.999996 | 5.99826e-06 | 0.999996 |
| rad67                         | 1.76909e-06 | 0.999998 | 1.76909e-06 | 0.999998 |
| Ph+Allene                     | 8.18996e-07 | 0.999999 | 8.18996e-07 | 0.999999 |
| rad35                         | 7.31807e-07 | 1.000000 | 7.31807e-07 | 1.000000 |
| PhCH2CCH+H                    | 1.62469e-07 | 1.000000 | 1.62469e-07 | 1.000000 |
| PAH7+H                        | 1.00667e-07 | 1.000000 | 1.00667e-07 | 1.000000 |
| rad37                         | 2.83206e-08 | 1.000000 | 2.83206e-08 | 1.000000 |
| rad39                         | 2.48351e-08 | 1.000000 | 2.48351e-08 | 1.000000 |
| rad30                         | 1.39398e-08 | 1.000000 | 1.39398e-08 | 1.000000 |
| PAH9+H                        | 1.67898e-09 | 1.000000 | 1.67898e-09 | 1.000000 |
| rad38                         | 7.72652e-10 | 1.000000 | 7.72652e-10 | 1.000000 |
| PhcycC3H3_A+H                 | 3.25290e-10 | 1.000000 | 3.25290e-10 | 1.000000 |
| PAH10+CH3                     | 2.37266e-10 | 1.000000 | 2.37266e-10 | 1.000000 |
| rad60syn                      | 1.06834e-10 | 1.000000 | 1.06834e-10 | 1.000000 |
| PAH3+H                        | 9.84715e-11 | 1.000000 | 9.84715e-11 | 1.000000 |
| rad60anti                     | 5.51572e-11 | 1.000000 | 5.51572e-11 | 1.000000 |
| rad46                         | 5.45644e-11 | 1.000000 | 5.45644e-11 | 1.000000 |
| rad59                         | 1.67258e-11 | 1.000000 | 1.67258e-11 | 1.000000 |
| PhcycC3H3_B+H                 | 1.05896e-11 | 1.000000 | 1.05896e-11 | 1.000000 |
| Phenyl+cycC3H4                | 8.20984e-12 | 1.000000 | 0.000000    | 1.000000 |
| rad54                         | 7.66783e-12 | 1.000000 | 7.66783e-12 | 1.000000 |
| rad43                         | 5.65558e-12 | 1.000000 | 5.65558e-12 | 1.000000 |
| rad62                         | 1.25276e-12 | 1.000000 | 1.25276e-12 | 1.000000 |
| rad50                         | 1.03316e-12 | 1.000000 | 1.03316e-12 | 1.000000 |
| rad70                         | 3.13392e-13 | 1.000000 | 3.13392e-13 | 1.000000 |

|           |             |         |             |         |
|-----------|-------------|---------|-------------|---------|
| PAH1+H    | 1.93779e-13 | 1.00000 | 1.93779e-13 | 1.00000 |
| rad55     | 1.33843e-13 | 1.00000 | 1.33843e-13 | 1.00000 |
| rad52     | 1.45721e-14 | 1.00000 | 1.45721e-14 | 1.00000 |
| rad34     | 1.28521e-14 | 1.00000 | 1.28521e-14 | 1.00000 |
| rad58     | 1.11204e-14 | 1.00000 | 1.11204e-14 | 1.00000 |
| rad51     | 8.23952e-15 | 1.00000 | 8.23952e-15 | 1.00000 |
| rad41     | 3.58185e-15 | 1.00000 | 3.58185e-15 | 1.00000 |
| rad42     | 1.81926e-15 | 1.00000 | 1.81926e-15 | 1.00000 |
| rad65     | 2.32648e-16 | 1.00000 | 2.32648e-16 | 1.00000 |
| rad53     | 1.29481e-16 | 1.00000 | 1.29481e-16 | 1.00000 |
| rad64     | 4.98973e-17 | 1.00000 | 4.98973e-17 | 1.00000 |
| rad61     | 2.74862e-17 | 1.00000 | 2.74862e-17 | 1.00000 |
| rad56     | 3.01521e-18 | 1.00000 | 3.01521e-18 | 1.00000 |
| rad68syn  | 3.96643e-19 | 1.00000 | 3.96643e-19 | 1.00000 |
| rad68anti | 2.85688e-19 | 1.00000 | 2.85688e-19 | 1.00000 |
| rad40syn  | 1.34588e-20 | 1.00000 | 1.34588e-20 | 1.00000 |
| rad40anti | 1.02810e-20 | 1.00000 | 1.02810e-20 | 1.00000 |
| PAH8+H    | 5.53972e-21 | 1.00000 | 5.53972e-21 | 1.00000 |
| rad73     | 6.54843e-22 | 1.00000 | 6.54843e-22 | 1.00000 |
| rad71     | 2.13406e-23 | 1.00000 | 2.13406e-23 | 1.00000 |
| rad19anti | 1.46846e-24 | 1.00000 | 1.46846e-24 | 1.00000 |
| rad2      | 5.77959e-27 | 1.00000 | 5.77959e-27 | 1.00000 |
| rad6      | 2.79884e-27 | 1.00000 | 2.79884e-27 | 1.00000 |
| rad1      | 4.35617e-28 | 1.00000 | 4.35617e-28 | 1.00000 |
| rad10     | 4.05015e-28 | 1.00000 | 4.05015e-28 | 1.00000 |
| rad3      | 2.20712e-28 | 1.00000 | 2.20712e-28 | 1.00000 |
| rad4      | 1.09784e-28 | 1.00000 | 1.09784e-28 | 1.00000 |
| rad26     | 8.96322e-29 | 1.00000 | 8.96322e-29 | 1.00000 |
| rad9      | 3.55368e-29 | 1.00000 | 3.55368e-29 | 1.00000 |
| rad28     | 1.16017e-29 | 1.00000 | 1.16017e-29 | 1.00000 |
| rad72     | 4.67174e-30 | 1.00000 | 4.67174e-30 | 1.00000 |
| rad23     | 1.46005e-30 | 1.00000 | 1.46005e-30 | 1.00000 |
| rad31     | 9.66297e-31 | 1.00000 | 9.66297e-31 | 1.00000 |
| rad7      | 2.40839e-31 | 1.00000 | 2.40839e-31 | 1.00000 |
| rad19syn  | 1.12386e-31 | 1.00000 | 1.12386e-31 | 1.00000 |
| rad45     | 1.00959e-31 | 1.00000 | 1.00959e-31 | 1.00000 |
| rad11     | 5.63556e-32 | 1.00000 | 5.63556e-32 | 1.00000 |
| rad25     | 3.61934e-32 | 1.00000 | 3.61934e-32 | 1.00000 |
| rad14     | 2.58065e-32 | 1.00000 | 2.58065e-32 | 1.00000 |
| rad15     | 2.04672e-32 | 1.00000 | 2.04672e-32 | 1.00000 |
| rad47     | 1.77284e-32 | 1.00000 | 1.77284e-32 | 1.00000 |
| rad27     | 1.45930e-32 | 1.00000 | 1.45930e-32 | 1.00000 |
| rad36     | 3.44130e-33 | 1.00000 | 3.44130e-33 | 1.00000 |
| rad13     | 1.43944e-33 | 1.00000 | 1.43944e-33 | 1.00000 |
| rad12     | 9.82711e-34 | 1.00000 | 9.82711e-34 | 1.00000 |
| rad33     | 1.27534e-34 | 1.00000 | 1.27534e-34 | 1.00000 |
| rad5      | 5.71988e-35 | 1.00000 | 5.71988e-35 | 1.00000 |
| rad21     | 1.07582e-35 | 1.00000 | 1.07582e-35 | 1.00000 |
| rad20     | 6.32982e-36 | 1.00000 | 6.32982e-36 | 1.00000 |
| rad22     | 1.79612e-37 | 1.00000 | 1.79612e-37 | 1.00000 |
| rad18     | 1.20143e-37 | 1.00000 | 1.20143e-37 | 1.00000 |
| rad24     | 4.91519e-39 | 1.00000 | 4.91519e-39 | 1.00000 |
| rad8      | 3.04177e-49 | 1.00000 | 3.04177e-49 | 1.00000 |

0.100000000E-07 Pa, 310.000000 K

| Rate constant             | True (fraction)        | Effective (fraction)   |
|---------------------------|------------------------|------------------------|
| Total                     | 5.92544e-14 (1.00 )    | 5.92544e-14 (1.00 )    |
| Formation of rad19        | 5.91462e-14 (0.998 )   | 5.91462e-14 (0.998 )   |
| H-abstraction to cyc2enyl | 1.07628e-16 (0.00182 ) | 1.07628e-16 (0.00182 ) |
| H-abstraction to cyclenyl | 5.62537e-19 (9.49e-06) | 5.62537e-19 (9.49e-06) |

  

| species                       | PYtrue      | Cumul    | PYeffective | Cumul    |
|-------------------------------|-------------|----------|-------------|----------|
| Indene+H                      | 0.997536    | 0.997536 | 0.997536    | 0.997536 |
| Benzene+cycloprop-2-enylidene | 0.00181637  | 0.999353 | 0.00181637  | 0.999353 |
| PhCHCCH2+H                    | 0.000599213 | 0.999952 | 0.000599213 | 0.999952 |
| PhCCH+CH3                     | 1.07899e-05 | 0.999963 | 1.07899e-05 | 0.999963 |
| C2H2+PhCH2                    | 9.94973e-06 | 0.999973 | 9.94973e-06 | 0.999973 |
| Benzene+cycloprop-1-enylidene | 9.49359e-06 | 0.999982 | 9.49359e-06 | 0.999982 |
| PhCCCH3+H                     | 6.92725e-06 | 0.999989 | 6.92725e-06 | 0.999989 |
| Ph+MeAc                       | 6.69436e-06 | 0.999996 | 6.69436e-06 | 0.999996 |
| rad67                         | 1.91404e-06 | 0.999998 | 1.91404e-06 | 0.999998 |
| Ph+Allene                     | 1.02854e-06 | 0.999999 | 1.02854e-06 | 0.999999 |
| rad35                         | 8.00939e-07 | 0.999999 | 8.00939e-07 | 0.999999 |
| PhCH2CCH+H                    | 1.75897e-07 | 1.000000 | 1.75897e-07 | 1.000000 |
| PAH7+H                        | 9.96917e-08 | 1.000000 | 9.96917e-08 | 1.000000 |
| rad37                         | 2.86985e-08 | 1.000000 | 2.86985e-08 | 1.000000 |
| rad39                         | 2.78945e-08 | 1.000000 | 2.78945e-08 | 1.000000 |

|                |             |          |             |          |
|----------------|-------------|----------|-------------|----------|
| rad30          | 1.58794e-08 | 1.000000 | 1.58794e-08 | 1.000000 |
| PAH9+H         | 1.63685e-09 | 1.000000 | 1.63685e-09 | 1.000000 |
| rad38          | 8.60336e-10 | 1.000000 | 8.60336e-10 | 1.000000 |
| PhcycC3H3_A+H  | 4.09102e-10 | 1.000000 | 4.09102e-10 | 1.000000 |
| PAH10+CH3      | 2.45221e-10 | 1.000000 | 2.45221e-10 | 1.000000 |
| rad60syn       | 1.25085e-10 | 1.000000 | 1.25085e-10 | 1.000000 |
| PAH3+H         | 1.05828e-10 | 1.000000 | 1.05828e-10 | 1.000000 |
| rad60anti      | 6.43937e-11 | 1.000000 | 6.43937e-11 | 1.000000 |
| rad46          | 5.94068e-11 | 1.000000 | 5.94068e-11 | 1.000000 |
| rad59          | 1.93817e-11 | 1.000000 | 1.93817e-11 | 1.000000 |
| PhcycC3H3_B+H  | 1.41415e-11 | 1.000000 | 1.41415e-11 | 1.000000 |
| Phenyl+cycC3H4 | 1.07882e-11 | 1.000000 | 0.00000     | 1.000000 |
| rad54          | 8.89606e-12 | 1.000000 | 8.89606e-12 | 1.000000 |
| rad43          | 6.83075e-12 | 1.000000 | 6.83075e-12 | 1.000000 |
| rad62          | 1.51159e-12 | 1.000000 | 1.51159e-12 | 1.000000 |
| rad50          | 1.17696e-12 | 1.000000 | 1.17696e-12 | 1.000000 |
| rad70          | 3.87563e-13 | 1.000000 | 3.87563e-13 | 1.000000 |
| PAH1+H         | 2.83537e-13 | 1.000000 | 2.83537e-13 | 1.000000 |
| rad55          | 1.69858e-13 | 1.000000 | 1.69858e-13 | 1.000000 |
| rad52          | 1.66060e-14 | 1.000000 | 1.66060e-14 | 1.000000 |
| rad34          | 1.64058e-14 | 1.000000 | 1.64058e-14 | 1.000000 |
| rad58          | 1.50872e-14 | 1.000000 | 1.50872e-14 | 1.000000 |
| rad51          | 1.01582e-14 | 1.000000 | 1.01582e-14 | 1.000000 |
| rad41          | 4.78440e-15 | 1.000000 | 4.78440e-15 | 1.000000 |
| rad42          | 2.42635e-15 | 1.000000 | 2.42635e-15 | 1.000000 |
| rad65          | 2.87409e-16 | 1.000000 | 2.87409e-16 | 1.000000 |
| rad53          | 1.82136e-16 | 1.000000 | 1.82136e-16 | 1.000000 |
| rad64          | 6.86553e-17 | 1.000000 | 6.86553e-17 | 1.000000 |
| rad61          | 3.85257e-17 | 1.000000 | 3.85257e-17 | 1.000000 |
| rad56          | 4.20810e-18 | 1.000000 | 4.20810e-18 | 1.000000 |
| rad68syn       | 5.79184e-19 | 1.000000 | 5.79184e-19 | 1.000000 |
| rad68anti      | 4.21603e-19 | 1.000000 | 4.21603e-19 | 1.000000 |
| rad40syn       | 1.84909e-20 | 1.000000 | 1.84909e-20 | 1.000000 |
| rad40anti      | 1.45861e-20 | 1.000000 | 1.45861e-20 | 1.000000 |
| PAH8+H         | 5.99119e-21 | 1.000000 | 5.99119e-21 | 1.000000 |
| rad73          | 7.86975e-22 | 1.000000 | 7.86975e-22 | 1.000000 |
| rad71          | 1.54165e-23 | 1.000000 | 1.54165e-23 | 1.000000 |
| rad19anti      | 1.86169e-27 | 1.000000 | 1.86169e-27 | 1.000000 |
| rad6           | 6.68194e-29 | 1.000000 | 6.68194e-29 | 1.000000 |
| rad2           | 2.88998e-30 | 1.000000 | 2.88998e-30 | 1.000000 |
| rad1           | 2.24616e-31 | 1.000000 | 2.24616e-31 | 1.000000 |
| rad10          | 1.17003e-31 | 1.000000 | 1.17003e-31 | 1.000000 |
| rad3           | 1.30386e-32 | 1.000000 | 1.30386e-32 | 1.000000 |
| rad4           | 6.96836e-33 | 1.000000 | 6.96836e-33 | 1.000000 |
| rad7           | 4.98422e-33 | 1.000000 | 4.98422e-33 | 1.000000 |
| rad47          | 3.77537e-33 | 1.000000 | 3.77537e-33 | 1.000000 |
| rad11          | 1.08435e-33 | 1.000000 | 1.08435e-33 | 1.000000 |
| rad31          | 1.07023e-33 | 1.000000 | 1.07023e-33 | 1.000000 |
| rad26          | 5.25424e-34 | 1.000000 | 5.25424e-34 | 1.000000 |
| rad28          | 4.20018e-34 | 1.000000 | 4.20018e-34 | 1.000000 |
| rad13          | 2.89837e-35 | 1.000000 | 2.89837e-35 | 1.000000 |
| rad19syn       | 1.62279e-35 | 1.000000 | 1.62279e-35 | 1.000000 |
| rad9           | 1.57589e-36 | 1.000000 | 1.57589e-36 | 1.000000 |
| rad14          | 3.95256e-37 | 1.000000 | 3.95256e-37 | 1.000000 |
| rad25          | 3.08072e-37 | 1.000000 | 3.08072e-37 | 1.000000 |
| rad23          | 1.70715e-37 | 1.000000 | 1.70715e-37 | 1.000000 |
| rad27          | 8.55810e-38 | 1.000000 | 8.55810e-38 | 1.000000 |
| rad33          | 4.46268e-38 | 1.000000 | 4.46268e-38 | 1.000000 |
| rad45          | 1.17278e-38 | 1.000000 | 1.17278e-38 | 1.000000 |
| rad36          | 7.77640e-40 | 1.000000 | 7.77640e-40 | 1.000000 |
| rad15          | 7.15678e-40 | 1.000000 | 7.15678e-40 | 1.000000 |
| rad5           | 2.10030e-41 | 1.000000 | 2.10030e-41 | 1.000000 |
| rad12          | 1.33211e-41 | 1.000000 | 1.33211e-41 | 1.000000 |
| rad21          | 1.30939e-42 | 1.000000 | 1.30939e-42 | 1.000000 |
| rad20          | 1.26792e-42 | 1.000000 | 1.26792e-42 | 1.000000 |
| rad22          | 2.98567e-44 | 1.000000 | 2.98567e-44 | 1.000000 |
| rad18          | 1.26086e-45 | 1.000000 | 1.26086e-45 | 1.000000 |
| rad24          | 1.45790e-46 | 1.000000 | 1.45790e-46 | 1.000000 |
| rad8           | 1.69031e-62 | 1.000000 | 1.69031e-62 | 1.000000 |

0.100000000E-07 Pa, 400.000000 K

| Rate constant             | True (fraction)        | Effective (fraction)   |
|---------------------------|------------------------|------------------------|
| Total                     | 1.29463e-13 (1.00 )    | 1.29463e-13 (1.00 )    |
| Formation of rad19        | 1.28526e-13 (0.993 )   | 1.28526e-13 (0.993 )   |
| H-abstraction to cyc2enyl | 9.19357e-16 (0.00710 ) | 9.19357e-16 (0.00710 ) |
| H-abstraction to cyclenyl | 1.69485e-17 (0.000131) | 1.69485e-17 (0.000131) |
| species                   | PYtrue                 | Cumul                  |
|                           |                        | PYeffective            |
|                           |                        | Cumul                  |

|                               |             |          |             |          |
|-------------------------------|-------------|----------|-------------|----------|
| Indene+H                      | 0.991683    | 0.991683 | 0.991683    | 0.991683 |
| Benzene+cycloprop-2-enylidene | 0.00710133  | 0.998784 | 0.00710133  | 0.998784 |
| PhCHCCH2+H                    | 0.00100586  | 0.999790 | 0.00100586  | 0.999790 |
| Benzene+cycloprop-1-enylidene | 0.000130914 | 0.999921 | 0.000130914 | 0.999921 |
| C2H2+PhCH2                    | 2.22468e-05 | 0.999943 | 2.22468e-05 | 0.999943 |
| PhCCH+CH3                     | 1.95098e-05 | 0.999963 | 1.95098e-05 | 0.999963 |
| Ph+MeAc                       | 1.45179e-05 | 0.999977 | 1.45179e-05 | 0.999977 |
| PhCCCH3+H                     | 1.31952e-05 | 0.999990 | 1.31952e-05 | 0.999990 |
| rad67                         | 4.22167e-06 | 0.999994 | 4.22167e-06 | 0.999994 |
| Ph+Allene                     | 2.97391e-06 | 0.999997 | 2.97391e-06 | 0.999997 |
| rad35                         | 1.68909e-06 | 0.999999 | 1.68909e-06 | 0.999999 |
| PhCH2CCH+H                    | 6.93048e-07 | 1.000000 | 6.93048e-07 | 1.000000 |
| PAH7+H                        | 2.89758e-07 | 1.000000 | 2.89758e-07 | 1.000000 |
| rad37                         | 8.82205e-08 | 1.000000 | 8.82205e-08 | 1.000000 |
| rad39                         | 7.05188e-08 | 1.000000 | 7.05188e-08 | 1.000000 |
| rad30                         | 3.41246e-08 | 1.000000 | 3.41246e-08 | 1.000000 |
| PAH9+H                        | 5.67069e-09 | 1.000000 | 5.67069e-09 | 1.000000 |
| PhcycC3H3_A+H                 | 4.88900e-09 | 1.000000 | 4.88900e-09 | 1.000000 |
| rad38                         | 3.07435e-09 | 1.000000 | 3.07435e-09 | 1.000000 |
| PAH10+CH3                     | 1.94150e-09 | 1.000000 | 1.94150e-09 | 1.000000 |
| PAH3+H                        | 5.34449e-10 | 1.000000 | 5.34449e-10 | 1.000000 |
| PhcycC3H3_B+H                 | 4.15151e-10 | 1.000000 | 4.15151e-10 | 1.000000 |
| rad60syn                      | 3.79130e-10 | 1.000000 | 3.79130e-10 | 1.000000 |
| rad46                         | 2.31290e-10 | 1.000000 | 2.31290e-10 | 1.000000 |
| Phenyl+cycC3H4                | 2.22328e-10 | 1.000000 | 0.000000    | 1.000000 |
| rad60anti                     | 2.01850e-10 | 1.000000 | 2.01850e-10 | 1.000000 |
| rad59                         | 8.49299e-11 | 1.000000 | 8.49299e-11 | 1.000000 |
| rad54                         | 6.39706e-11 | 1.000000 | 6.39706e-11 | 1.000000 |
| rad43                         | 3.46932e-11 | 1.000000 | 3.46932e-11 | 1.000000 |
| rad50                         | 8.28672e-12 | 1.000000 | 8.28672e-12 | 1.000000 |
| rad62                         | 7.28467e-12 | 1.000000 | 7.28467e-12 | 1.000000 |
| rad70                         | 3.85328e-12 | 1.000000 | 3.85328e-12 | 1.000000 |
| PAH1+H                        | 3.61003e-12 | 1.000000 | 3.61003e-12 | 1.000000 |
| rad55                         | 1.60055e-12 | 1.000000 | 1.60055e-12 | 1.000000 |
| rad34                         | 2.43952e-13 | 1.000000 | 2.43952e-13 | 1.000000 |
| rad52                         | 1.72576e-13 | 1.000000 | 1.72576e-13 | 1.000000 |
| rad58                         | 1.69180e-13 | 1.000000 | 1.69180e-13 | 1.000000 |
| rad51                         | 1.42864e-13 | 1.000000 | 1.42864e-13 | 1.000000 |
| rad41                         | 6.83260e-14 | 1.000000 | 6.83260e-14 | 1.000000 |
| rad42                         | 2.71734e-14 | 1.000000 | 2.71734e-14 | 1.000000 |
| rad53                         | 6.88019e-15 | 1.000000 | 6.88019e-15 | 1.000000 |
| rad65                         | 4.39173e-15 | 1.000000 | 4.39173e-15 | 1.000000 |
| rad61                         | 3.43038e-15 | 1.000000 | 3.43038e-15 | 1.000000 |
| rad64                         | 3.05834e-15 | 1.000000 | 3.05834e-15 | 1.000000 |
| rad56                         | 5.30924e-16 | 1.000000 | 5.30924e-16 | 1.000000 |
| rad68syn                      | 7.48244e-17 | 1.000000 | 7.48244e-17 | 1.000000 |
| rad68anti                     | 5.24834e-17 | 1.000000 | 5.24834e-17 | 1.000000 |
| rad40syn                      | 6.39129e-18 | 1.000000 | 6.39129e-18 | 1.000000 |
| PAH8+H                        | 5.94551e-18 | 1.000000 | 5.94551e-18 | 1.000000 |
| rad40anti                     | 4.74371e-18 | 1.000000 | 4.74371e-18 | 1.000000 |
| rad73                         | 4.85676e-19 | 1.000000 | 4.85676e-19 | 1.000000 |
| rad71                         | 4.97335e-20 | 1.000000 | 4.97335e-20 | 1.000000 |
| rad19anti                     | 4.76696e-21 | 1.000000 | 4.76696e-21 | 1.000000 |
| rad6                          | 1.21137e-23 | 1.000000 | 1.21137e-23 | 1.000000 |
| rad2                          | 1.17484e-23 | 1.000000 | 1.17484e-23 | 1.000000 |
| rad23                         | 1.18418e-24 | 1.000000 | 1.18418e-24 | 1.000000 |
| rad1                          | 1.09623e-24 | 1.000000 | 1.09623e-24 | 1.000000 |
| rad10                         | 9.52716e-25 | 1.000000 | 9.52716e-25 | 1.000000 |
| rad72                         | 7.32148e-25 | 1.000000 | 7.32148e-25 | 1.000000 |
| rad45                         | 2.05149e-25 | 1.000000 | 2.05149e-25 | 1.000000 |
| rad3                          | 1.82173e-25 | 1.000000 | 1.82173e-25 | 1.000000 |
| rad4                          | 9.60546e-26 | 1.000000 | 9.60546e-26 | 1.000000 |
| rad19syn                      | 2.04434e-26 | 1.000000 | 2.04434e-26 | 1.000000 |
| rad9                          | 1.20993e-26 | 1.000000 | 1.20993e-26 | 1.000000 |
| rad36                         | 7.91425e-27 | 1.000000 | 7.91425e-27 | 1.000000 |
| rad31                         | 5.03677e-27 | 1.000000 | 5.03677e-27 | 1.000000 |
| rad7                          | 9.87474e-28 | 1.000000 | 9.87474e-28 | 1.000000 |
| rad11                         | 1.68547e-28 | 1.000000 | 1.68547e-28 | 1.000000 |
| rad26                         | 1.32147e-28 | 1.000000 | 1.32147e-28 | 1.000000 |
| rad28                         | 3.91302e-29 | 1.000000 | 3.91302e-29 | 1.000000 |
| rad15                         | 7.29213e-30 | 1.000000 | 7.29213e-30 | 1.000000 |
| rad13                         | 6.16354e-30 | 1.000000 | 6.16354e-30 | 1.000000 |
| rad12                         | 1.89512e-30 | 1.000000 | 1.89512e-30 | 1.000000 |
| rad47                         | 7.65193e-31 | 1.000000 | 7.65193e-31 | 1.000000 |
| rad25                         | 1.12730e-31 | 1.000000 | 1.12730e-31 | 1.000000 |
| rad14                         | 6.52419e-32 | 1.000000 | 6.52419e-32 | 1.000000 |
| rad27                         | 5.57589e-32 | 1.000000 | 5.57589e-32 | 1.000000 |
| rad22                         | 2.51133e-32 | 1.000000 | 2.51133e-32 | 1.000000 |
| rad33                         | 9.25929e-33 | 1.000000 | 9.25929e-33 | 1.000000 |

|       |             |         |             |         |
|-------|-------------|---------|-------------|---------|
| rad21 | 4.23866e-34 | 1.00000 | 4.23866e-34 | 1.00000 |
| rad20 | 1.80285e-34 | 1.00000 | 1.80285e-34 | 1.00000 |
| rad5  | 5.84372e-35 | 1.00000 | 5.84372e-35 | 1.00000 |
| rad24 | 3.33640e-36 | 1.00000 | 3.33640e-36 | 1.00000 |
| rad18 | 7.04047e-37 | 1.00000 | 7.04047e-37 | 1.00000 |
| rad8  | 6.65008e-46 | 1.00000 | 6.65008e-46 | 1.00000 |

0.100000000E-07 Pa, 500.00000 K

| Rate constant             | True (fraction)        | Effective (fraction)   |
|---------------------------|------------------------|------------------------|
| Total                     | 2.52837e-13 (1.00 )    | 2.52837e-13 (1.00 )    |
| Formation of rad19        | 2.47941e-13 (0.981 )   | 2.47941e-13 (0.981 )   |
| H-abstraction to cyc2enyl | 4.69058e-15 (0.0186 )  | 4.69058e-15 (0.0186 )  |
| H-abstraction to cyclenyl | 2.05381e-16 (0.000812) | 2.05381e-16 (0.000812) |

| species                       | PYtrue      | Cumul    | PYeffective | Cumul    |
|-------------------------------|-------------|----------|-------------|----------|
| Indene+H                      | 0.978428    | 0.978428 | 0.978428    | 0.978428 |
| Benzene+cycloprop-2-enylidene | 0.0185518   | 0.996979 | 0.0185518   | 0.996979 |
| PhCHCCH2+H                    | 0.00202477  | 0.999004 | 0.00202477  | 0.999004 |
| Benzene+cycloprop-1-enylidene | 0.000812306 | 0.999816 | 0.000812306 | 0.999816 |
| C2H2+PhCH2                    | 5.13363e-05 | 0.999868 | 5.13363e-05 | 0.999868 |
| PhCCH+CH3                     | 3.71182e-05 | 0.999905 | 3.71182e-05 | 0.999905 |
| Ph+MeAc                       | 3.63101e-05 | 0.999941 | 3.63101e-05 | 0.999941 |
| PhCCCH3+H                     | 2.84449e-05 | 0.999970 | 2.84449e-05 | 0.999970 |
| Ph+Allene                     | 1.09470e-05 | 0.999981 | 1.09470e-05 | 0.999981 |
| rad67                         | 1.05822e-05 | 0.999991 | 1.05822e-05 | 0.999991 |
| rad35                         | 4.10935e-06 | 0.999995 | 4.10935e-06 | 0.999995 |
| PhCH2CCH+H                    | 2.95392e-06 | 0.999998 | 2.95392e-06 | 0.999998 |
| PAH7+H                        | 8.51564e-07 | 0.999999 | 8.51564e-07 | 0.999999 |
| rad37                         | 2.86678e-07 | 0.999999 | 2.86678e-07 | 0.999999 |
| rad39                         | 2.02118e-07 | 1.000000 | 2.02118e-07 | 1.000000 |
| rad30                         | 8.94923e-08 | 1.000000 | 8.94923e-08 | 1.000000 |
| PhcycC3H3_A+H                 | 5.02850e-08 | 1.000000 | 5.02850e-08 | 1.000000 |
| PAH9+H                        | 2.06879e-08 | 1.000000 | 2.06879e-08 | 1.000000 |
| PAH10+CH3                     | 1.44052e-08 | 1.000000 | 1.44052e-08 | 1.000000 |
| rad38                         | 1.31834e-08 | 1.000000 | 1.31834e-08 | 1.000000 |
| PhcycC3H3_B+H                 | 7.81107e-09 | 1.000000 | 7.81107e-09 | 1.000000 |
| Phenyl+cycC3H4                | 3.55660e-09 | 1.000000 | 0.000000    | 1.000000 |
| PAH3+H                        | 2.97649e-09 | 1.000000 | 2.97649e-09 | 1.000000 |
| rad60syn                      | 1.43183e-09 | 1.000000 | 1.43183e-09 | 1.000000 |
| rad46                         | 1.04913e-09 | 1.000000 | 1.04913e-09 | 1.000000 |
| rad60anti                     | 7.84373e-10 | 1.000000 | 7.84373e-10 | 1.000000 |
| rad54                         | 4.68691e-10 | 1.000000 | 4.68691e-10 | 1.000000 |
| rad59                         | 4.42102e-10 | 1.000000 | 4.42102e-10 | 1.000000 |
| rad43                         | 1.96278e-10 | 1.000000 | 1.96278e-10 | 1.000000 |
| rad50                         | 6.65687e-11 | 1.000000 | 6.65687e-11 | 1.000000 |
| PAH1+H                        | 4.68911e-11 | 1.000000 | 4.68911e-11 | 1.000000 |
| rad62                         | 3.77646e-11 | 1.000000 | 3.77646e-11 | 1.000000 |
| rad70                         | 3.76454e-11 | 1.000000 | 3.76454e-11 | 1.000000 |
| rad55                         | 1.50995e-11 | 1.000000 | 1.50995e-11 | 1.000000 |
| rad34                         | 3.22092e-12 | 1.000000 | 3.22092e-12 | 1.000000 |
| rad51                         | 2.08196e-12 | 1.000000 | 2.08196e-12 | 1.000000 |
| rad58                         | 2.05092e-12 | 1.000000 | 2.05092e-12 | 1.000000 |
| rad52                         | 1.88540e-12 | 1.000000 | 1.88540e-12 | 1.000000 |
| rad41                         | 8.63972e-13 | 1.000000 | 8.63972e-13 | 1.000000 |
| rad42                         | 2.74850e-13 | 1.000000 | 2.74850e-13 | 1.000000 |
| rad53                         | 1.70507e-13 | 1.000000 | 1.70507e-13 | 1.000000 |
| rad61                         | 1.40668e-13 | 1.000000 | 1.40668e-13 | 1.000000 |
| rad64                         | 7.73135e-14 | 1.000000 | 7.73135e-14 | 1.000000 |
| rad65                         | 6.64224e-14 | 1.000000 | 6.64224e-14 | 1.000000 |
| rad56                         | 2.62115e-14 | 1.000000 | 2.62115e-14 | 1.000000 |
| rad68syn                      | 3.88259e-15 | 1.000000 | 3.88259e-15 | 1.000000 |
| rad68anti                     | 2.67414e-15 | 1.000000 | 2.67414e-15 | 1.000000 |
| PAH8+H                        | 8.47559e-16 | 1.000000 | 8.47559e-16 | 1.000000 |
| rad40syn                      | 5.55783e-16 | 1.000000 | 5.55783e-16 | 1.000000 |
| rad40anti                     | 4.06573e-16 | 1.000000 | 4.06573e-16 | 1.000000 |
| rad73                         | 6.83536e-17 | 1.000000 | 6.83536e-17 | 1.000000 |
| rad71                         | 1.35737e-17 | 1.000000 | 1.35737e-17 | 1.000000 |
| rad19anti                     | 6.68017e-19 | 1.000000 | 6.68017e-19 | 1.000000 |
| rad2                          | 7.51474e-21 | 1.000000 | 7.51474e-21 | 1.000000 |
| rad23                         | 7.22296e-21 | 1.000000 | 7.22296e-21 | 1.000000 |
| rad45                         | 2.03760e-21 | 1.000000 | 2.03760e-21 | 1.000000 |
| rad72                         | 1.99196e-21 | 1.000000 | 1.99196e-21 | 1.000000 |
| rad6                          | 1.29466e-21 | 1.000000 | 1.29466e-21 | 1.000000 |
| rad1                          | 9.09735e-22 | 1.000000 | 9.09735e-22 | 1.000000 |
| rad10                         | 3.93833e-22 | 1.000000 | 3.93833e-22 | 1.000000 |
| rad19syn                      | 1.45990e-22 | 1.000000 | 1.45990e-22 | 1.000000 |
| rad3                          | 1.35879e-22 | 1.000000 | 1.35879e-22 | 1.000000 |

|       |             |          |             |          |
|-------|-------------|----------|-------------|----------|
| rad36 | 1.14242e-22 | 1.000000 | 1.14242e-22 | 1.000000 |
| rad4  | 7.81584e-23 | 1.000000 | 7.81584e-23 | 1.000000 |
| rad9  | 1.91468e-23 | 1.000000 | 1.91468e-23 | 1.000000 |
| rad31 | 1.77645e-24 | 1.000000 | 1.77645e-24 | 1.000000 |
| rad7  | 1.02730e-25 | 1.000000 | 1.02730e-25 | 1.000000 |
| rad12 | 1.85136e-26 | 1.000000 | 1.85136e-26 | 1.000000 |
| rad11 | 1.61613e-26 | 1.000000 | 1.61613e-26 | 1.000000 |
| rad15 | 1.22230e-26 | 1.000000 | 1.22230e-26 | 1.000000 |
| rad26 | 6.47380e-27 | 1.000000 | 6.47380e-27 | 1.000000 |
| rad28 | 3.48551e-27 | 1.000000 | 3.48551e-27 | 1.000000 |
| rad13 | 7.04316e-28 | 1.000000 | 7.04316e-28 | 1.000000 |
| rad47 | 5.02583e-29 | 1.000000 | 5.02583e-29 | 1.000000 |
| rad22 | 4.75773e-29 | 1.000000 | 4.75773e-29 | 1.000000 |
| rad33 | 8.66872e-31 | 1.000000 | 8.66872e-31 | 1.000000 |
| rad25 | 7.42587e-31 | 1.000000 | 7.42587e-31 | 1.000000 |
| rad27 | 5.20719e-31 | 1.000000 | 5.20719e-31 | 1.000000 |
| rad14 | 3.33806e-31 | 1.000000 | 3.33806e-31 | 1.000000 |
| rad21 | 6.83172e-32 | 1.000000 | 6.83172e-32 | 1.000000 |
| rad20 | 1.96304e-32 | 1.000000 | 1.96304e-32 | 1.000000 |
| rad24 | 1.38320e-32 | 1.000000 | 1.38320e-32 | 1.000000 |
| rad5  | 7.46741e-35 | 1.000000 | 7.46741e-35 | 1.000000 |
| rad18 | 1.57087e-35 | 1.000000 | 1.57087e-35 | 1.000000 |
| rad8  | 1.56286e-41 | 1.000000 | 1.56286e-41 | 1.000000 |

0.100000000E-07 Pa, 600.000000 K

| Rate constant             | True (fraction)        | Effective (fraction)   |
|---------------------------|------------------------|------------------------|
| Total                     | 4.35570e-13 (1.00 )    | 4.35570e-13 (1.00 )    |
| Formation of rad19        | 4.18892e-13 (0.962 )   | 4.18892e-13 (0.962 )   |
| H-abstraction to cyc2enyl | 1.54751e-14 (0.0355 )  | 1.54751e-14 (0.0355 )  |
| H-abstraction to cyclenyl | 1.20343e-15 (0.00276 ) | 1.20343e-15 (0.00276 ) |

| species                       | PYtrue      | Cumul    | PYeffective | Cumul    |
|-------------------------------|-------------|----------|-------------|----------|
| Indene+H                      | 0.957276    | 0.957276 | 0.957276    | 0.957276 |
| Benzene+cycloprop-2-enylidene | 0.0355285   | 0.992805 | 0.0355285   | 0.992805 |
| PhCHCCH2+H                    | 0.00402172  | 0.996826 | 0.00402172  | 0.996826 |
| Benzene+cycloprop-1-enylidene | 0.00276289  | 0.999589 | 0.00276289  | 0.999589 |
| C2H2+PhCH2                    | 0.000111945 | 0.999701 | 0.000111945 | 0.999701 |
| Ph+MeAc                       | 8.57420e-05 | 0.999787 | 8.57420e-05 | 0.999787 |
| PhCCH+CH3                     | 6.75064e-05 | 0.999854 | 6.75064e-05 | 0.999854 |
| PhCCCH3+H                     | 5.90383e-05 | 0.999913 | 5.90383e-05 | 0.999913 |
| Ph+Allene                     | 3.56628e-05 | 0.999949 | 3.56628e-05 | 0.999949 |
| rad67                         | 2.54029e-05 | 0.999975 | 2.54029e-05 | 0.999975 |
| PhCH2CCH+H                    | 1.09199e-05 | 0.999985 | 1.09199e-05 | 0.999985 |
| rad35                         | 9.63305e-06 | 0.999995 | 9.63305e-06 | 0.999995 |
| PAH7+H                        | 2.26706e-06 | 0.999997 | 2.26706e-06 | 0.999997 |
| rad37                         | 8.64904e-07 | 0.999998 | 8.64904e-07 | 0.999998 |
| rad39                         | 5.20249e-07 | 0.999999 | 5.20249e-07 | 0.999999 |
| PhcycC3H3_A+H                 | 3.56529e-07 | 0.999999 | 3.56529e-07 | 0.999999 |
| rad30                         | 2.27441e-07 | 0.999999 | 2.27441e-07 | 0.999999 |
| PAH10+CH3                     | 8.50920e-08 | 0.999999 | 8.50920e-08 | 0.999999 |
| PhcycC3H3_B+H                 | 8.43895e-08 | 0.999999 | 8.43895e-08 | 0.999999 |
| PAH9+H                        | 7.13070e-08 | 1.000000 | 7.13070e-08 | 1.000000 |
| rad38                         | 5.21311e-08 | 1.000000 | 5.21311e-08 | 1.000000 |
| Phenyl+cycC3H4                | 3.58023e-08 | 1.000000 | 0.000000    | 1.000000 |
| PAH3+H                        | 1.45691e-08 | 1.000000 | 1.45691e-08 | 1.000000 |
| rad60syn                      | 5.03972e-09 | 1.000000 | 5.03972e-09 | 1.000000 |
| rad46                         | 4.37621e-09 | 1.000000 | 4.37621e-09 | 1.000000 |
| rad60anti                     | 2.82886e-09 | 1.000000 | 2.82886e-09 | 1.000000 |
| rad54                         | 2.63022e-09 | 1.000000 | 2.63022e-09 | 1.000000 |
| rad59                         | 2.03126e-09 | 1.000000 | 2.03126e-09 | 1.000000 |
| rad43                         | 9.14301e-10 | 1.000000 | 9.14301e-10 | 1.000000 |
| rad50                         | 4.49074e-10 | 1.000000 | 4.49074e-10 | 1.000000 |
| PAH1+H                        | 4.05905e-10 | 1.000000 | 4.05905e-10 | 1.000000 |
| rad70                         | 2.63826e-10 | 1.000000 | 2.63826e-10 | 1.000000 |
| rad62                         | 1.58022e-10 | 1.000000 | 1.58022e-10 | 1.000000 |
| rad55                         | 1.01573e-10 | 1.000000 | 1.01573e-10 | 1.000000 |
| rad34                         | 2.81348e-11 | 1.000000 | 2.81348e-11 | 1.000000 |
| rad51                         | 2.21630e-11 | 1.000000 | 2.21630e-11 | 1.000000 |
| rad58                         | 1.79744e-11 | 1.000000 | 1.79744e-11 | 1.000000 |
| rad52                         | 1.61050e-11 | 1.000000 | 1.61050e-11 | 1.000000 |
| rad41                         | 7.27827e-12 | 1.000000 | 7.27827e-12 | 1.000000 |
| rad61                         | 2.69080e-12 | 1.000000 | 2.69080e-12 | 1.000000 |
| rad53                         | 2.26526e-12 | 1.000000 | 2.26526e-12 | 1.000000 |
| rad42                         | 1.88131e-12 | 1.000000 | 1.88131e-12 | 1.000000 |
| rad64                         | 9.96176e-13 | 1.000000 | 9.96176e-13 | 1.000000 |
| rad65                         | 7.15322e-13 | 1.000000 | 7.15322e-13 | 1.000000 |
| rad56                         | 5.47638e-13 | 1.000000 | 5.47638e-13 | 1.000000 |



|           |             |          |             |          |
|-----------|-------------|----------|-------------|----------|
| rad68syn  | 8.54715e-14 | 1.000000 | 8.54715e-14 | 1.000000 |
| rad68anti | 5.81389e-14 | 1.000000 | 5.81389e-14 | 1.000000 |
| PAH8+H    | 3.69240e-14 | 1.000000 | 3.69240e-14 | 1.000000 |
| rad40syn  | 1.73285e-14 | 1.000000 | 1.73285e-14 | 1.000000 |
| rad40anti | 1.26417e-14 | 1.000000 | 1.26417e-14 | 1.000000 |
| rad73     | 3.37834e-15 | 1.000000 | 3.37834e-15 | 1.000000 |
| rad71     | 1.04445e-15 | 1.000000 | 1.04445e-15 | 1.000000 |
| rad19anti | 4.93441e-18 | 1.000000 | 4.93441e-18 | 1.000000 |
| rad72     | 6.43633e-19 | 1.000000 | 6.43633e-19 | 1.000000 |
| rad23     | 4.11239e-19 | 1.000000 | 4.11239e-19 | 1.000000 |
| rad2      | 3.50526e-19 | 1.000000 | 3.50526e-19 | 1.000000 |
| rad45     | 1.27391e-19 | 1.000000 | 1.27391e-19 | 1.000000 |
| rad1      | 5.90399e-20 | 1.000000 | 5.90399e-20 | 1.000000 |
| rad9      | 4.20120e-20 | 1.000000 | 4.20120e-20 | 1.000000 |
| rad19syn  | 1.52297e-20 | 1.000000 | 1.52297e-20 | 1.000000 |
| rad36     | 1.40143e-20 | 1.000000 | 1.40143e-20 | 1.000000 |
| rad10     | 9.86155e-21 | 1.000000 | 9.86155e-21 | 1.000000 |
| rad6      | 9.30613e-21 | 1.000000 | 9.30614e-21 | 1.000000 |
| rad3      | 6.78005e-21 | 1.000000 | 6.78005e-21 | 1.000000 |
| rad4      | 4.58121e-21 | 1.000000 | 4.58121e-21 | 1.000000 |
| rad12     | 1.38518e-22 | 1.000000 | 1.38518e-22 | 1.000000 |
| rad31     | 3.24820e-23 | 1.000000 | 3.24820e-23 | 1.000000 |
| rad15     | 2.53725e-23 | 1.000000 | 2.53725e-23 | 1.000000 |
| rad7      | 8.02615e-25 | 1.000000 | 8.02615e-25 | 1.000000 |
| rad11     | 1.41972e-25 | 1.000000 | 1.41972e-25 | 1.000000 |
| rad26     | 9.86953e-26 | 1.000000 | 9.86953e-26 | 1.000000 |
| rad28     | 5.97336e-26 | 1.000000 | 5.97336e-26 | 1.000000 |
| rad13     | 6.28531e-27 | 1.000000 | 6.28531e-27 | 1.000000 |
| rad22     | 2.03069e-27 | 1.000000 | 2.03069e-27 | 1.000000 |
| rad47     | 1.30363e-27 | 1.000000 | 1.30363e-27 | 1.000000 |
| rad24     | 9.86828e-29 | 1.000000 | 9.86828e-29 | 1.000000 |
| rad21     | 3.64938e-29 | 1.000000 | 3.64938e-29 | 1.000000 |
| rad33     | 3.50184e-29 | 1.000000 | 3.50184e-29 | 1.000000 |
| rad25     | 1.21118e-29 | 1.000000 | 1.21118e-29 | 1.000000 |
| rad27     | 1.07883e-29 | 1.000000 | 1.07883e-29 | 1.000000 |
| rad20     | 7.10674e-30 | 1.000000 | 7.10674e-30 | 1.000000 |
| rad14     | 3.70455e-30 | 1.000000 | 3.70455e-30 | 1.000000 |
| rad18     | 8.55833e-34 | 1.000000 | 8.55833e-34 | 1.000000 |
| rad5      | 1.31321e-34 | 1.000000 | 1.31321e-34 | 1.000000 |
| rad8      | 2.39366e-36 | 1.000000 | 2.39366e-36 | 1.000000 |

0.100000000E-07 Pa, 700.000000 K

| Rate constant             | True (fraction)        | Effective (fraction)   |
|---------------------------|------------------------|------------------------|
| Total                     | 6.91694e-13 (1.00 )    | 6.91694e-13 (1.00 )    |
| Formation of rad19        | 6.47922e-13 (0.937 )   | 6.47922e-13 (0.937 )   |
| H-abstraction to cyc2enyl | 3.91858e-14 (0.0567 )  | 3.91858e-14 (0.0567 )  |
| H-abstraction to cyclenyl | 4.58543e-15 (0.00663 ) | 4.58542e-15 (0.00663 ) |

| species                       | PYtrue      | Cumul    | PYeffective | Cumul    |
|-------------------------------|-------------|----------|-------------|----------|
| Indene+H                      | 0.928261    | 0.928261 | 0.928261    | 0.928261 |
| Benzene+cycloprop-2-enylidene | 0.0566520   | 0.984913 | 0.0566520   | 0.984913 |
| PhCHCCH2+H                    | 0.00759850  | 0.992512 | 0.00759851  | 0.992512 |
| Benzene+cycloprop-1-enylidene | 0.00662927  | 0.999141 | 0.00662927  | 0.999141 |
| C2H2+PhCH2                    | 0.000223367 | 0.999364 | 0.000223367 | 0.999364 |
| Ph+MeAc                       | 0.000184762 | 0.999549 | 0.000184762 | 0.999549 |
| PhCCH+CH3                     | 0.000114475 | 0.999663 | 0.000114475 | 0.999663 |
| PhCCCH3+H                     | 0.000114174 | 0.999778 | 0.000114174 | 0.999778 |
| Ph+Allene                     | 9.86533e-05 | 0.999876 | 9.86533e-05 | 0.999876 |
| rad67                         | 5.61617e-05 | 0.999932 | 5.61618e-05 | 0.999932 |
| PhCH2CCH+H                    | 3.37385e-05 | 0.999966 | 3.37385e-05 | 0.999966 |
| rad35                         | 2.09201e-05 | 0.999987 | 2.09202e-05 | 0.999987 |
| PAH7+H                        | 5.25052e-06 | 0.999992 | 5.25052e-06 | 0.999992 |
| rad37                         | 2.31770e-06 | 0.999995 | 2.31770e-06 | 0.999995 |
| PhcycC3H3_A+H                 | 1.84668e-06 | 0.999997 | 1.84668e-06 | 0.999997 |
| rad39                         | 1.15814e-06 | 0.999998 | 1.15814e-06 | 0.999998 |
| PhcycC3H3_B+H                 | 5.97889e-07 | 0.999998 | 5.97889e-07 | 0.999998 |
| rad30                         | 5.35177e-07 | 0.999999 | 5.35177e-07 | 0.999999 |
| PAH10+CH3                     | 3.93624e-07 | 0.999999 | 3.93624e-07 | 0.999999 |
| Phenyl+cycC3H4                | 2.47273e-07 | 0.999999 | 0.00000     | 0.999999 |
| PAH9+H                        | 2.20558e-07 | 1.000000 | 2.20558e-07 | 0.999999 |
| rad38                         | 1.79348e-07 | 1.000000 | 1.79348e-07 | 1.000000 |
| PAH3+H                        | 5.98815e-08 | 1.000000 | 5.98815e-08 | 1.000000 |
| rad46                         | 1.59383e-08 | 1.000000 | 1.59383e-08 | 1.000000 |
| rad60syn                      | 1.57198e-08 | 1.000000 | 1.57198e-08 | 1.000000 |
| rad54                         | 1.11959e-08 | 1.000000 | 1.11959e-08 | 1.000000 |
| rad60anti                     | 9.00502e-09 | 1.000000 | 9.00502e-09 | 1.000000 |
| rad59                         | 7.88061e-09 | 1.000000 | 7.88061e-09 | 1.000000 |

|           |             |          |             |          |
|-----------|-------------|----------|-------------|----------|
| rad43     | 3.45953e-09 | 1.000000 | 3.45953e-09 | 1.000000 |
| PAH1+H    | 2.45995e-09 | 1.000000 | 2.45995e-09 | 1.000000 |
| rad50     | 2.44563e-09 | 1.000000 | 2.44563e-09 | 1.000000 |
| rad70     | 1.34938e-09 | 1.000000 | 1.34938e-09 | 1.000000 |
| rad62     | 5.31170e-10 | 1.000000 | 5.31170e-10 | 1.000000 |
| rad55     | 4.95201e-10 | 1.000000 | 4.95201e-10 | 1.000000 |
| rad51     | 1.72653e-10 | 1.000000 | 1.72653e-10 | 1.000000 |
| rad34     | 1.70511e-10 | 1.000000 | 1.70511e-10 | 1.000000 |
| rad58     | 1.15481e-10 | 1.000000 | 1.15481e-10 | 1.000000 |
| rad52     | 1.05442e-10 | 1.000000 | 1.05442e-10 | 1.000000 |
| rad41     | 4.33848e-11 | 1.000000 | 4.33848e-11 | 1.000000 |
| rad61     | 2.93831e-11 | 1.000000 | 2.93831e-11 | 1.000000 |
| rad53     | 1.83949e-11 | 1.000000 | 1.83949e-11 | 1.000000 |
| rad42     | 9.22818e-12 | 1.000000 | 9.22818e-12 | 1.000000 |
| rad64     | 7.68987e-12 | 1.000000 | 7.68987e-12 | 1.000000 |
| rad56     | 6.14022e-12 | 1.000000 | 6.14022e-12 | 1.000000 |
| rad65     | 5.56200e-12 | 1.000000 | 5.56200e-12 | 1.000000 |
| rad68syn  | 1.01762e-12 | 1.000000 | 1.01762e-12 | 1.000000 |
| PAH8+H    | 7.27467e-13 | 1.000000 | 7.27467e-13 | 1.000000 |
| rad68anti | 6.85898e-13 | 1.000000 | 6.85898e-13 | 1.000000 |
| rad40syn  | 2.67923e-13 | 1.000000 | 2.67923e-13 | 1.000000 |
| rad40anti | 1.96404e-13 | 1.000000 | 1.96404e-13 | 1.000000 |
| rad73     | 8.03975e-14 | 1.000000 | 8.03975e-14 | 1.000000 |
| rad71     | 3.42948e-14 | 1.000000 | 3.42948e-14 | 1.000000 |
| rad72     | 5.61670e-17 | 1.000000 | 5.61671e-17 | 1.000000 |
| rad9      | 3.02897e-17 | 1.000000 | 3.02897e-17 | 1.000000 |
| rad19anti | 6.95729e-18 | 1.000000 | 6.95729e-18 | 1.000000 |
| rad23     | 1.96783e-18 | 1.000000 | 1.96783e-18 | 1.000000 |
| rad2      | 1.60703e-18 | 1.000000 | 1.60703e-18 | 1.000000 |
| rad45     | 6.05057e-19 | 1.000000 | 6.05058e-19 | 1.000000 |
| rad1      | 4.20909e-19 | 1.000000 | 4.20909e-19 | 1.000000 |
| rad12     | 1.17945e-19 | 1.000000 | 1.17945e-19 | 1.000000 |
| rad19syn  | 8.87889e-20 | 1.000000 | 8.87889e-20 | 1.000000 |
| rad36     | 8.73364e-20 | 1.000000 | 8.73364e-20 | 1.000000 |
| rad10     | 3.91773e-20 | 1.000000 | 3.91773e-20 | 1.000000 |
| rad3      | 2.43954e-20 | 1.000000 | 2.43954e-20 | 1.000000 |
| rad4      | 1.99880e-20 | 1.000000 | 1.99880e-20 | 1.000000 |
| rad6      | 1.91069e-20 | 1.000000 | 1.91069e-20 | 1.000000 |
| rad15     | 1.20603e-20 | 1.000000 | 1.20603e-20 | 1.000000 |
| rad31     | 9.71078e-23 | 1.000000 | 9.71078e-23 | 1.000000 |
| rad7      | 1.92301e-24 | 1.000000 | 1.92301e-24 | 1.000000 |
| rad11     | 4.03142e-25 | 1.000000 | 4.03143e-25 | 1.000000 |
| rad26     | 3.26613e-25 | 1.000000 | 3.26613e-25 | 1.000000 |
| rad28     | 2.02638e-25 | 1.000000 | 2.02639e-25 | 1.000000 |
| rad24     | 2.00377e-25 | 1.000000 | 2.00377e-25 | 1.000000 |
| rad21     | 3.05155e-26 | 1.000000 | 3.05155e-26 | 1.000000 |
| rad13     | 1.94313e-26 | 1.000000 | 1.94313e-26 | 1.000000 |
| rad47     | 1.29142e-26 | 1.000000 | 1.29142e-26 | 1.000000 |
| rad22     | 1.02496e-26 | 1.000000 | 1.02496e-26 | 1.000000 |
| rad33     | 9.19492e-27 | 1.000000 | 9.19492e-27 | 1.000000 |
| rad20     | 4.79030e-27 | 1.000000 | 4.79030e-27 | 1.000000 |
| rad25     | 4.89851e-28 | 1.000000 | 4.89850e-28 | 1.000000 |
| rad27     | 4.80606e-28 | 1.000000 | 4.80606e-28 | 1.000000 |
| rad14     | 8.71111e-29 | 1.000000 | 8.71112e-29 | 1.000000 |
| rad8      | 5.34063e-31 | 1.000000 | 5.34063e-31 | 1.000000 |
| rad18     | 3.22559e-32 | 1.000000 | 3.22559e-32 | 1.000000 |
| rad5      | 3.56247e-34 | 1.000000 | 3.56247e-34 | 1.000000 |

0.100000000E-07 Pa, 800.000000 K

=====

| Rate constant             | True (fraction)       | Effective (fraction)  |
|---------------------------|-----------------------|-----------------------|
| Total                     | 1.03759e-12 (1.00 )   | 1.03758e-12 (1.00 )   |
| Formation of rad19        | 9.41065e-13 (0.907 )  | 9.41063e-13 (0.907 )  |
| H-abstraction to cyc2enyl | 8.32953e-14 (0.0803 ) | 8.32953e-14 (0.0803 ) |
| H-abstraction to cyclenyl | 1.32261e-14 (0.0127 ) | 1.32261e-14 (0.0127 ) |

  

| species                       | PYtrue      | Cumul    | PYeffective | Cumul    |
|-------------------------------|-------------|----------|-------------|----------|
| Indene+H                      | 0.891851    | 0.891851 | 0.891852    | 0.891852 |
| Benzene+cycloprop-2-enylidene | 0.0802780   | 0.972129 | 0.0802781   | 0.972130 |
| PhCHCCH2+H                    | 0.0134622   | 0.985591 | 0.0134623   | 0.985592 |
| Benzene+cycloprop-1-enylidene | 0.0127470   | 0.998338 | 0.0127470   | 0.998339 |
| C2H2+PhCH2                    | 0.000407098 | 0.998746 | 0.000407098 | 0.998747 |
| Ph+MeAc                       | 0.000361138 | 0.999107 | 0.000361137 | 0.999108 |
| Ph+Allene                     | 0.000232338 | 0.999339 | 0.000232338 | 0.999340 |
| PhCCCH3+H                     | 0.000203971 | 0.999543 | 0.000203971 | 0.999544 |
| PhCCH+CH3                     | 0.000180552 | 0.999724 | 0.000180553 | 0.999725 |
| rad67                         | 0.000113174 | 0.999837 | 0.000113174 | 0.999838 |
| PhCH2CCH+H                    | 8.77930e-05 | 0.999924 | 8.77932e-05 | 0.999925 |

|                |             |          |             |          |
|----------------|-------------|----------|-------------|----------|
| rad35          | 4.16128e-05 | 0.999966 | 4.16129e-05 | 0.999967 |
| PAH7+H         | 1.05800e-05 | 0.999977 | 1.05800e-05 | 0.999978 |
| PhcycC3H3_A+H  | 7.41209e-06 | 0.999984 | 7.41210e-06 | 0.999985 |
| rad37          | 5.46662e-06 | 0.999990 | 5.46663e-06 | 0.999991 |
| PhcycC3H3_B+H  | 3.06124e-06 | 0.999993 | 3.06124e-06 | 0.999994 |
| rad39          | 2.23427e-06 | 0.999995 | 2.23428e-06 | 0.999996 |
| PAH10+CH3      | 1.45372e-06 | 0.999996 | 1.45373e-06 | 0.999997 |
| Phenyl+cycC3H4 | 1.26413e-06 | 0.999998 | 0.00000     | 0.999997 |
| rad30          | 1.14933e-06 | 0.999999 | 1.14933e-06 | 0.999998 |
| PAH9+H         | 6.06281e-07 | 0.999999 | 6.06282e-07 | 0.999999 |
| rad38          | 5.31254e-07 | 1.000000 | 5.31255e-07 | 1.000000 |
| PAH3+H         | 2.06534e-07 | 1.000000 | 2.06535e-07 | 1.000000 |
| rad46          | 5.03837e-08 | 1.000000 | 5.03838e-08 | 1.000000 |
| rad60syn       | 4.30113e-08 | 1.000000 | 4.30113e-08 | 1.000000 |
| rad54          | 3.72615e-08 | 1.000000 | 3.72615e-08 | 1.000000 |
| rad59          | 2.58004e-08 | 1.000000 | 2.58004e-08 | 1.000000 |
| rad60anti      | 2.50612e-08 | 1.000000 | 2.50612e-08 | 1.000000 |
| PAH1+H         | 1.11102e-08 | 1.000000 | 1.11102e-08 | 1.000000 |
| rad50          | 1.08530e-08 | 1.000000 | 1.08530e-08 | 1.000000 |
| rad43          | 1.08255e-08 | 1.000000 | 1.08255e-08 | 1.000000 |
| rad70          | 5.27763e-09 | 1.000000 | 5.27763e-09 | 1.000000 |
| rad55          | 1.83174e-09 | 1.000000 | 1.83175e-09 | 1.000000 |
| rad62          | 1.46956e-09 | 1.000000 | 1.46956e-09 | 1.000000 |
| rad51          | 1.02140e-09 | 1.000000 | 1.02140e-09 | 1.000000 |
| rad34          | 7.64053e-10 | 1.000000 | 7.64054e-10 | 1.000000 |
| rad58          | 5.66064e-10 | 1.000000 | 5.66065e-10 | 1.000000 |
| rad52          | 5.41768e-10 | 1.000000 | 5.41769e-10 | 1.000000 |
| rad61          | 2.09071e-10 | 1.000000 | 2.09072e-10 | 1.000000 |
| rad41          | 1.94594e-10 | 1.000000 | 1.94595e-10 | 1.000000 |
| rad53          | 1.01501e-10 | 1.000000 | 1.01501e-10 | 1.000000 |
| rad56          | 4.31932e-11 | 1.000000 | 4.31933e-11 | 1.000000 |
| rad64          | 4.01362e-11 | 1.000000 | 4.01363e-11 | 1.000000 |
| rad42          | 3.44813e-11 | 1.000000 | 3.44814e-11 | 1.000000 |
| rad65          | 3.26029e-11 | 1.000000 | 3.26029e-11 | 1.000000 |
| PAH8+H         | 8.11495e-12 | 1.000000 | 8.11497e-12 | 1.000000 |
| rad68syn       | 7.66845e-12 | 1.000000 | 7.66845e-12 | 1.000000 |
| rad68anti      | 5.13228e-12 | 1.000000 | 5.13229e-12 | 1.000000 |
| rad40syn       | 2.48636e-12 | 1.000000 | 2.48636e-12 | 1.000000 |
| rad40anti      | 1.83893e-12 | 1.000000 | 1.83893e-12 | 1.000000 |
| rad73          | 1.11381e-12 | 1.000000 | 1.11381e-12 | 1.000000 |
| rad71          | 6.08037e-13 | 1.000000 | 6.08038e-13 | 1.000000 |
| rad9           | 2.69203e-15 | 1.000000 | 2.69204e-15 | 1.000000 |
| rad72          | 2.02032e-15 | 1.000000 | 2.02032e-15 | 1.000000 |
| rad12          | 6.62384e-18 | 1.000000 | 6.62385e-18 | 1.000000 |
| rad19anti      | 6.02835e-18 | 1.000000 | 6.02835e-18 | 1.000000 |
| rad23          | 3.45528e-18 | 1.000000 | 3.45529e-18 | 1.000000 |
| rad2           | 2.42539e-18 | 1.000000 | 2.42539e-18 | 1.000000 |
| rad45          | 1.34939e-18 | 1.000000 | 1.34939e-18 | 1.000000 |
| rad1           | 7.51134e-19 | 1.000000 | 7.51135e-19 | 1.000000 |
| rad15          | 6.14389e-19 | 1.000000 | 6.14390e-19 | 1.000000 |
| rad36          | 1.67525e-19 | 1.000000 | 1.67526e-19 | 1.000000 |
| rad19syn       | 1.44428e-19 | 1.000000 | 1.44428e-19 | 1.000000 |
| rad10          | 5.53935e-20 | 1.000000 | 5.53936e-20 | 1.000000 |
| rad3           | 3.24844e-20 | 1.000000 | 3.24845e-20 | 1.000000 |
| rad4           | 2.69231e-20 | 1.000000 | 2.69231e-20 | 1.000000 |
| rad6           | 2.41363e-20 | 1.000000 | 2.41364e-20 | 1.000000 |
| rad31          | 1.51028e-22 | 1.000000 | 1.51028e-22 | 1.000000 |
| rad24          | 4.04465e-23 | 1.000000 | 4.04465e-23 | 1.000000 |
| rad21          | 1.34471e-23 | 1.000000 | 1.34471e-23 | 1.000000 |
| rad7           | 2.86306e-24 | 1.000000 | 2.86306e-24 | 1.000000 |
| rad33          | 2.36769e-24 | 1.000000 | 2.36769e-24 | 1.000000 |
| rad20          | 2.16399e-24 | 1.000000 | 2.16399e-24 | 1.000000 |
| rad11          | 6.66403e-25 | 1.000000 | 6.66403e-25 | 1.000000 |
| rad26          | 4.50356e-25 | 1.000000 | 4.50357e-25 | 1.000000 |
| rad28          | 2.77880e-25 | 1.000000 | 2.77881e-25 | 1.000000 |
| rad13          | 1.93413e-25 | 1.000000 | 1.93413e-25 | 1.000000 |
| rad47          | 8.53940e-26 | 1.000000 | 8.53940e-26 | 1.000000 |
| rad27          | 3.72406e-26 | 1.000000 | 3.72406e-26 | 1.000000 |
| rad25          | 3.67481e-26 | 1.000000 | 3.67482e-26 | 1.000000 |
| rad8           | 2.39851e-26 | 1.000000 | 2.39851e-26 | 1.000000 |
| rad22          | 1.99452e-26 | 1.000000 | 1.99452e-26 | 1.000000 |
| rad14          | 3.83309e-27 | 1.000000 | 3.83309e-27 | 1.000000 |
| rad18          | 4.91401e-30 | 1.000000 | 4.91402e-30 | 1.000000 |
| rad5           | 1.73064e-33 | 1.000000 | 1.73064e-33 | 1.000000 |

0.100000000E-07 Pa, 900.000000 K

| Rate constant | True (fraction)    | Effective (fraction) |
|---------------|--------------------|----------------------|
| Total         | 1.49199e-12 (1.00) | 1.49199e-12 (1.00)   |

Formation of rad19 | 1.30395e-12 (0.874 ) 1.30394e-12 (0.874 )  
H-abstraction to cyc2enyl | 1.56554e-13 (0.105 ) 1.56554e-13 (0.105 )  
H-abstraction to cyclenyl | 3.14892e-14 (0.0211 ) 3.14890e-14 (0.0211 )

| species                       | PYtrue      | Cumul    | PYeffective | Cumul    |
|-------------------------------|-------------|----------|-------------|----------|
| Indene+H                      | 0.848699    | 0.848699 | 0.848703    | 0.848703 |
| Benzene+cycloprop-2-enylidene | 0.104929    | 0.953628 | 0.104930    | 0.953634 |
| PhCHCCH2+H                    | 0.0222941   | 0.975922 | 0.0222941   | 0.975928 |
| Benzene+cycloprop-1-enylidene | 0.0211054   | 0.997028 | 0.0211054   | 0.997033 |
| C2H2+PhCH2                    | 0.000683868 | 0.997712 | 0.000683871 | 0.997717 |
| Ph+MeAc                       | 0.000643403 | 0.998355 | 0.000643406 | 0.998360 |
| Ph+Allene                     | 0.000474185 | 0.998829 | 0.000474187 | 0.998835 |
| PhCCCH3+H                     | 0.000337156 | 0.999166 | 0.000337157 | 0.999172 |
| PhCCH+CH3                     | 0.000266833 | 0.999433 | 0.000266834 | 0.999439 |
| rad67                         | 0.000208252 | 0.999641 | 0.000208253 | 0.999647 |
| PhCH2CCH+H                    | 0.000196562 | 0.999838 | 0.000196563 | 0.999843 |
| rad35                         | 7.58728e-05 | 0.999914 | 7.58733e-05 | 0.999919 |
| PhcycC3H3_A+H                 | 2.42103e-05 | 0.999938 | 2.42105e-05 | 0.999943 |
| PAH7+H                        | 1.88375e-05 | 0.999957 | 1.88376e-05 | 0.999962 |
| PhcycC3H3_B+H                 | 1.21561e-05 | 0.999969 | 1.21561e-05 | 0.999974 |
| rad37                         | 1.14050e-05 | 0.999980 | 1.14050e-05 | 0.999986 |
| Phenyl+cycC3H4                | 5.07995e-06 | 0.999986 | 0.00000     | 0.999986 |
| PAH10+CH3                     | 4.40461e-06 | 0.999990 | 4.40463e-06 | 0.999990 |
| rad39                         | 3.79886e-06 | 0.999994 | 3.79888e-06 | 0.999994 |
| rad30                         | 2.25163e-06 | 0.999996 | 2.25165e-06 | 0.999996 |
| PAH9+H                        | 1.48864e-06 | 0.999997 | 1.48865e-06 | 0.999998 |
| rad38                         | 1.36505e-06 | 0.999999 | 1.36505e-06 | 0.999999 |
| PAH3+H                        | 6.06186e-07 | 0.999999 | 6.06189e-07 | 1.000000 |
| rad46                         | 1.39482e-07 | 1.000000 | 1.39483e-07 | 1.000000 |
| rad60syn                      | 1.03783e-07 | 1.000000 | 1.03784e-07 | 1.000000 |
| rad54                         | 1.00666e-07 | 1.000000 | 1.00667e-07 | 1.000000 |
| rad59                         | 7.22570e-08 | 1.000000 | 7.22573e-08 | 1.000000 |
| rad60anti                     | 6.13421e-08 | 1.000000 | 6.13425e-08 | 1.000000 |
| rad50                         | 4.00788e-08 | 1.000000 | 4.00791e-08 | 1.000000 |
| PAH1+H                        | 3.94732e-08 | 1.000000 | 3.94734e-08 | 1.000000 |
| rad43                         | 2.87031e-08 | 1.000000 | 2.87033e-08 | 1.000000 |
| rad70                         | 1.65408e-08 | 1.000000 | 1.65408e-08 | 1.000000 |
| rad55                         | 5.38699e-09 | 1.000000 | 5.38702e-09 | 1.000000 |
| rad51                         | 4.77134e-09 | 1.000000 | 4.77137e-09 | 1.000000 |
| rad62                         | 3.44637e-09 | 1.000000 | 3.44638e-09 | 1.000000 |
| rad34                         | 2.67892e-09 | 1.000000 | 2.67894e-09 | 1.000000 |
| rad52                         | 2.25237e-09 | 1.000000 | 2.25238e-09 | 1.000000 |
| rad58                         | 2.20457e-09 | 1.000000 | 2.20458e-09 | 1.000000 |
| rad61                         | 1.06256e-09 | 1.000000 | 1.06257e-09 | 1.000000 |
| rad41                         | 6.91191e-10 | 1.000000 | 6.91194e-10 | 1.000000 |
| rad53                         | 4.12665e-10 | 1.000000 | 4.12668e-10 | 1.000000 |
| rad56                         | 2.12371e-10 | 1.000000 | 2.12372e-10 | 1.000000 |
| rad64                         | 1.54860e-10 | 1.000000 | 1.54860e-10 | 1.000000 |
| rad65                         | 1.50319e-10 | 1.000000 | 1.50320e-10 | 1.000000 |
| rad42                         | 1.03376e-10 | 1.000000 | 1.03377e-10 | 1.000000 |
| PAH8+H                        | 5.91171e-11 | 1.000000 | 5.91174e-11 | 1.000000 |
| rad68syn                      | 4.07131e-11 | 1.000000 | 4.07134e-11 | 1.000000 |
| rad68anti                     | 2.70946e-11 | 1.000000 | 2.70946e-11 | 1.000000 |
| rad40syn                      | 1.56733e-11 | 1.000000 | 1.56733e-11 | 1.000000 |
| rad40anti                     | 1.17159e-11 | 1.000000 | 1.17159e-11 | 1.000000 |
| rad73                         | 1.01666e-11 | 1.000000 | 1.01667e-11 | 1.000000 |
| rad71                         | 6.75145e-12 | 1.000000 | 6.75148e-12 | 1.000000 |
| rad72                         | 3.83062e-14 | 1.000000 | 3.83064e-14 | 1.000000 |
| rad9                          | 2.37338e-14 | 1.000000 | 2.37340e-14 | 1.000000 |
| rad12                         | 4.04546e-17 | 1.000000 | 4.04549e-17 | 1.000000 |
| rad19anti                     | 4.57501e-18 | 1.000000 | 4.57503e-18 | 1.000000 |
| rad23                         | 3.88243e-18 | 1.000000 | 3.88245e-18 | 1.000000 |
| rad15                         | 3.75605e-18 | 1.000000 | 3.75607e-18 | 1.000000 |
| rad2                          | 2.39696e-18 | 1.000000 | 2.39698e-18 | 1.000000 |
| rad45                         | 1.86240e-18 | 1.000000 | 1.86241e-18 | 1.000000 |
| rad1                          | 7.33691e-19 | 1.000000 | 7.33695e-19 | 1.000000 |
| rad36                         | 2.09175e-19 | 1.000000 | 2.09176e-19 | 1.000000 |
| rad19syn                      | 1.51735e-19 | 1.000000 | 1.51736e-19 | 1.000000 |
| rad10                         | 4.74719e-20 | 1.000000 | 4.74721e-20 | 1.000000 |
| rad3                          | 2.75013e-20 | 1.000000 | 2.75015e-20 | 1.000000 |
| rad6                          | 2.29437e-20 | 1.000000 | 2.29438e-20 | 1.000000 |
| rad4                          | 2.28018e-20 | 1.000000 | 2.28020e-20 | 1.000000 |
| rad21                         | 1.24312e-21 | 1.000000 | 1.24313e-21 | 1.000000 |
| rad24                         | 8.13232e-22 | 1.000000 | 8.13237e-22 | 1.000000 |
| rad20                         | 2.39352e-22 | 1.000000 | 2.39354e-22 | 1.000000 |
| rad31                         | 1.88477e-22 | 1.000000 | 1.88478e-22 | 1.000000 |
| rad33                         | 1.64389e-22 | 1.000000 | 1.64390e-22 | 1.000000 |
| rad8                          | 5.47269e-23 | 1.000000 | 5.47271e-23 | 1.000000 |
| rad13                         | 3.44445e-23 | 1.000000 | 3.44448e-23 | 1.000000 |

|       |             |         |             |         |
|-------|-------------|---------|-------------|---------|
| rad7  | 3.21546e-24 | 1.00000 | 3.21547e-24 | 1.00000 |
| rad25 | 2.46143e-24 | 1.00000 | 2.46143e-24 | 1.00000 |
| rad27 | 2.21049e-24 | 1.00000 | 2.21051e-24 | 1.00000 |
| rad11 | 1.71468e-24 | 1.00000 | 1.71470e-24 | 1.00000 |
| rad47 | 4.17543e-25 | 1.00000 | 4.17545e-25 | 1.00000 |
| rad26 | 3.61785e-25 | 1.00000 | 3.61786e-25 | 1.00000 |
| rad28 | 2.21387e-25 | 1.00000 | 2.21387e-25 | 1.00000 |
| rad14 | 1.65926e-25 | 1.00000 | 1.65927e-25 | 1.00000 |
| rad22 | 2.48868e-26 | 1.00000 | 2.48869e-26 | 1.00000 |
| rad18 | 1.59449e-27 | 1.00000 | 1.59450e-27 | 1.00000 |
| rad5  | 1.52782e-32 | 1.00000 | 1.52783e-32 | 1.00000 |

0.100000000E-07 Pa, 1000.00000 K

| Rate constant             | True (fraction)      | Effective (fraction) |
|---------------------------|----------------------|----------------------|
| Total                     | 2.07591e-12 (1.00)   | 2.07587e-12 (1.00)   |
| Formation of rad19        | 1.74189e-12 (0.839)  | 1.74186e-12 (0.839)  |
| H-abstraction to cyc2enyl | 2.68753e-13 (0.129)  | 2.68753e-13 (0.129)  |
| H-abstraction to cyc1enyl | 6.52627e-14 (0.0314) | 6.52614e-14 (0.0314) |

| species                       | PYtrue      | Cumul    | PYeffective | Cumul    |
|-------------------------------|-------------|----------|-------------|----------|
| Indene+H                      | 0.799582    | 0.799582 | 0.799596    | 0.799596 |
| Benzene+cycloprop-2-enylidene | 0.129463    | 0.929045 | 0.129465    | 0.929061 |
| PhCHCCH2+H                    | 0.0345727   | 0.963618 | 0.0345733   | 0.963635 |
| Benzene+cycloprop-1-enylidene | 0.0314382   | 0.995056 | 0.0314381   | 0.995073 |
| C2H2+PhCH2                    | 0.00107013  | 0.996126 | 0.00107014  | 0.996143 |
| Ph+MeAc                       | 0.00105356  | 0.997180 | 0.00105357  | 0.997197 |
| Ph+Allene                     | 0.000856132 | 0.998036 | 0.000856147 | 0.998053 |
| PhCCCH3+H                     | 0.000518388 | 0.998554 | 0.000518396 | 0.998571 |
| PhCH2CCH+H                    | 0.000387329 | 0.998942 | 0.000387336 | 0.998958 |
| PhCCH+CH3                     | 0.000373412 | 0.999315 | 0.000373419 | 0.999332 |
| rad67                         | 0.000352154 | 0.999667 | 0.000352160 | 0.999684 |
| rad35                         | 0.000127506 | 0.999795 | 0.000127508 | 0.999812 |
| PhcycC3H3_A+H                 | 6.68787e-05 | 0.999862 | 6.68799e-05 | 0.999878 |
| PhcycC3H3_B+H                 | 3.94287e-05 | 0.999901 | 3.94293e-05 | 0.999918 |
| PAH7+H                        | 3.02070e-05 | 0.999931 | 3.02075e-05 | 0.999948 |
| rad37                         | 2.12565e-05 | 0.999953 | 2.12568e-05 | 0.999969 |
| Phenyl+cycC3H4                | 1.68078e-05 | 0.999969 | 0.000000    | 0.999969 |
| PAH10+CH3                     | 1.12446e-05 | 0.999981 | 1.12447e-05 | 0.999981 |
| rad39                         | 5.81024e-06 | 0.999986 | 5.81034e-06 | 0.999986 |
| rad30                         | 4.04406e-06 | 0.999990 | 4.04413e-06 | 0.999990 |
| PAH9+H                        | 3.29361e-06 | 0.999994 | 3.29367e-06 | 0.999994 |
| rad38                         | 3.08261e-06 | 0.999997 | 3.08266e-06 | 0.999997 |
| PAH3+H                        | 1.54070e-06 | 0.999998 | 1.54073e-06 | 0.999998 |
| rad46                         | 3.42239e-07 | 0.999999 | 3.42245e-07 | 0.999999 |
| rad54                         | 2.28520e-07 | 0.999999 | 2.28524e-07 | 0.999999 |
| rad60syn                      | 2.23169e-07 | 0.999999 | 2.23173e-07 | 0.999999 |
| rad59                         | 1.76070e-07 | 0.999999 | 1.76073e-07 | 0.999999 |
| rad60anti                     | 1.33518e-07 | 1.000000 | 1.33520e-07 | 0.999999 |
| rad50                         | 1.25826e-07 | 1.000000 | 1.25828e-07 | 1.000000 |
| PAH1+H                        | 1.15144e-07 | 1.000000 | 1.15145e-07 | 1.000000 |
| rad43                         | 6.59875e-08 | 1.000000 | 6.59887e-08 | 1.000000 |
| rad70                         | 4.32135e-08 | 1.000000 | 4.32143e-08 | 1.000000 |
| rad51                         | 1.82048e-08 | 1.000000 | 1.82051e-08 | 1.000000 |
| rad55                         | 1.31137e-08 | 1.000000 | 1.31139e-08 | 1.000000 |
| rad52                         | 7.79283e-09 | 1.000000 | 7.79297e-09 | 1.000000 |
| rad34                         | 7.69222e-09 | 1.000000 | 7.69236e-09 | 1.000000 |
| rad58                         | 7.06658e-09 | 1.000000 | 7.06670e-09 | 1.000000 |
| rad62                         | 7.03940e-09 | 1.000000 | 7.03953e-09 | 1.000000 |
| rad61                         | 4.12272e-09 | 1.000000 | 4.12278e-09 | 1.000000 |
| rad41                         | 2.02447e-09 | 1.000000 | 2.02451e-09 | 1.000000 |
| rad53                         | 1.31432e-09 | 1.000000 | 1.31434e-09 | 1.000000 |
| rad56                         | 7.88428e-10 | 1.000000 | 7.88442e-10 | 1.000000 |
| rad65                         | 5.65099e-10 | 1.000000 | 5.65110e-10 | 1.000000 |
| rad64                         | 4.71855e-10 | 1.000000 | 4.71863e-10 | 1.000000 |
| PAH8+H                        | 3.09749e-10 | 1.000000 | 3.09755e-10 | 1.000000 |
| rad42                         | 2.59222e-10 | 1.000000 | 2.59226e-10 | 1.000000 |
| rad68syn                      | 1.64237e-10 | 1.000000 | 1.64240e-10 | 1.000000 |
| rad68anti                     | 1.08793e-10 | 1.000000 | 1.08795e-10 | 1.000000 |
| rad40syn                      | 7.30616e-11 | 1.000000 | 7.30628e-11 | 1.000000 |
| rad73                         | 6.65983e-11 | 1.000000 | 6.65995e-11 | 1.000000 |
| rad40anti                     | 5.52183e-11 | 1.000000 | 5.52193e-11 | 1.000000 |
| rad71                         | 5.18856e-11 | 1.000000 | 5.18865e-11 | 1.000000 |
| rad72                         | 4.47183e-13 | 1.000000 | 4.47191e-13 | 1.000000 |
| rad9                          | 4.34379e-14 | 1.000000 | 4.34386e-14 | 1.000000 |
| rad12                         | 7.27750e-17 | 1.000000 | 7.27764e-17 | 1.000000 |
| rad15                         | 5.72150e-18 | 1.000000 | 5.72161e-18 | 1.000000 |
| rad23                         | 3.88833e-18 | 1.000000 | 3.88840e-18 | 1.000000 |

|           |             |          |             |          |
|-----------|-------------|----------|-------------|----------|
| rad19anti | 3.42048e-18 | 1.000000 | 3.42054e-18 | 1.000000 |
| rad45     | 2.12354e-18 | 1.000000 | 2.12358e-18 | 1.000000 |
| rad2      | 2.01878e-18 | 1.000000 | 2.01882e-18 | 1.000000 |
| rad1      | 6.07085e-19 | 1.000000 | 6.07096e-19 | 1.000000 |
| rad36     | 2.26288e-19 | 1.000000 | 2.26292e-19 | 1.000000 |
| rad19syn  | 1.42443e-19 | 1.000000 | 1.42446e-19 | 1.000000 |
| rad10     | 4.02840e-20 | 1.000000 | 4.02847e-20 | 1.000000 |
| rad6      | 2.25672e-20 | 1.000000 | 2.25677e-20 | 1.000000 |
| rad21     | 2.11576e-20 | 1.000000 | 2.11580e-20 | 1.000000 |
| rad3      | 2.07171e-20 | 1.000000 | 2.07175e-20 | 1.000000 |
| rad4      | 1.71402e-20 | 1.000000 | 1.71405e-20 | 1.000000 |
| rad8      | 6.27706e-21 | 1.000000 | 6.27717e-21 | 1.000000 |
| rad20     | 4.93245e-21 | 1.000000 | 4.93254e-21 | 1.000000 |
| rad24     | 3.61522e-21 | 1.000000 | 3.61528e-21 | 1.000000 |
| rad33     | 2.31462e-21 | 1.000000 | 2.31466e-21 | 1.000000 |
| rad13     | 2.20293e-21 | 1.000000 | 2.20296e-21 | 1.000000 |
| rad31     | 2.18570e-22 | 1.000000 | 2.18575e-22 | 1.000000 |
| rad11     | 1.06831e-22 | 1.000000 | 1.06833e-22 | 1.000000 |
| rad25     | 7.69190e-23 | 1.000000 | 7.69203e-23 | 1.000000 |
| rad27     | 5.63063e-23 | 1.000000 | 5.63073e-23 | 1.000000 |
| rad7      | 5.75868e-24 | 1.000000 | 5.75879e-24 | 1.000000 |
| rad14     | 4.01739e-24 | 1.000000 | 4.01746e-24 | 1.000000 |
| rad47     | 1.62908e-24 | 1.000000 | 1.62911e-24 | 1.000000 |
| rad18     | 4.29913e-25 | 1.000000 | 4.29920e-25 | 1.000000 |
| rad26     | 2.74389e-25 | 1.000000 | 2.74395e-25 | 1.000000 |
| rad28     | 1.58956e-25 | 1.000000 | 1.58958e-25 | 1.000000 |
| rad22     | 2.89416e-26 | 1.000000 | 2.89421e-26 | 1.000000 |
| rad5      | 2.65447e-31 | 1.000000 | 2.65452e-31 | 1.000000 |

0.100000000E-07 Pa, 1100.00000 K

| Rate constant             | True (fraction)       | Effective (fraction)  |
|---------------------------|-----------------------|-----------------------|
| Total                     | 2.81236e-12 (1.00 )   | 2.81222e-12 (1.00 )   |
| Formation of rad19        | 2.25993e-12 (0.804 )  | 2.25980e-12 (0.804 )  |
| H-abstraction to cyc2enyl | 4.30538e-13 (0.153 )  | 4.30538e-13 (0.153 )  |
| H-abstraction to cyc1enyl | 1.21896e-13 (0.0433 ) | 1.21889e-13 (0.0433 ) |

| species                       | PYtrue      | Cumul    | PYeffective | Cumul    |
|-------------------------------|-------------|----------|-------------|----------|
| Indene+H                      | 0.745455    | 0.745455 | 0.745493    | 0.745493 |
| Benzene+cycloprop-2-enylidene | 0.153088    | 0.898543 | 0.153095    | 0.898588 |
| PhCHCCH2+H                    | 0.0504085   | 0.948951 | 0.0504110   | 0.948999 |
| Benzene+cycloprop-1-enylidene | 0.0433429   | 0.992294 | 0.0433425   | 0.992342 |
| Ph+MeAc                       | 0.00159989  | 0.993894 | 0.00159997  | 0.993942 |
| C2H2+PhCH2                    | 0.00157393  | 0.995468 | 0.00157401  | 0.995516 |
| Ph+Allene                     | 0.00139377  | 0.996862 | 0.00139384  | 0.996909 |
| PhCCCH3+H                     | 0.000746146 | 0.997608 | 0.000746184 | 0.997656 |
| PhCH2CCH+H                    | 0.000685299 | 0.998293 | 0.000685333 | 0.998341 |
| rad67                         | 0.000551509 | 0.998845 | 0.000551537 | 0.998892 |
| PhCCH+CH3                     | 0.000499927 | 0.999345 | 0.000499952 | 0.999392 |
| rad35                         | 0.000198904 | 0.999544 | 0.000198914 | 0.999591 |
| PhcycC3H3_A+H                 | 0.000160985 | 0.999705 | 0.000160994 | 0.999752 |
| PhcycC3H3_B+H                 | 0.000108569 | 0.999813 | 0.000108575 | 0.999861 |
| Phenyl+cycC3H4                | 4.74535e-05 | 0.999861 | 0.00000     | 0.999861 |
| PAH7+H                        | 4.44306e-05 | 0.999905 | 4.44328e-05 | 0.999905 |
| rad37                         | 3.57976e-05 | 0.999941 | 3.57993e-05 | 0.999941 |
| PAH10+CH3                     | 2.47740e-05 | 0.999966 | 2.47753e-05 | 0.999966 |
| rad39                         | 8.15502e-06 | 0.999974 | 8.15543e-06 | 0.999974 |
| rad30                         | 6.70503e-06 | 0.999981 | 6.70536e-06 | 0.999981 |
| PAH9+H                        | 6.62670e-06 | 0.999987 | 6.62703e-06 | 0.999987 |
| rad38                         | 6.20641e-06 | 0.999993 | 6.20672e-06 | 0.999994 |
| PAH3+H                        | 3.44988e-06 | 0.999997 | 3.45006e-06 | 0.999997 |
| rad46                         | 7.53032e-07 | 0.999998 | 7.53070e-07 | 0.999998 |
| rad54                         | 4.48842e-07 | 0.999998 | 4.48864e-07 | 0.999998 |
| rad60syn                      | 4.32688e-07 | 0.999998 | 4.32709e-07 | 0.999999 |
| rad59                         | 3.79560e-07 | 0.999999 | 3.79579e-07 | 0.999999 |
| rad50                         | 3.42341e-07 | 0.999999 | 3.42358e-07 | 0.999999 |
| PAH1+H                        | 2.85109e-07 | 0.999999 | 2.85123e-07 | 1.000000 |
| rad60anti                     | 2.61576e-07 | 1.000000 | 2.61589e-07 | 1.000000 |
| rad43                         | 1.34197e-07 | 1.000000 | 1.34204e-07 | 1.000000 |
| rad70                         | 9.71315e-08 | 1.000000 | 9.71362e-08 | 1.000000 |
| rad51                         | 5.83466e-08 | 1.000000 | 5.83495e-08 | 1.000000 |
| rad55                         | 2.73128e-08 | 1.000000 | 2.73142e-08 | 1.000000 |
| rad52                         | 2.29834e-08 | 1.000000 | 2.29845e-08 | 1.000000 |
| rad58                         | 1.92024e-08 | 1.000000 | 1.92034e-08 | 1.000000 |
| rad34                         | 1.87451e-08 | 1.000000 | 1.87461e-08 | 1.000000 |
| rad61                         | 1.28390e-08 | 1.000000 | 1.28397e-08 | 1.000000 |
| rad62                         | 1.28154e-08 | 1.000000 | 1.28161e-08 | 1.000000 |
| rad41                         | 5.04814e-09 | 1.000000 | 5.04840e-09 | 1.000000 |

|           |             |         |             |         |
|-----------|-------------|---------|-------------|---------|
| rad53     | 3.43664e-09 | 1.00000 | 3.43682e-09 | 1.00000 |
| rad56     | 2.33966e-09 | 1.00000 | 2.33978e-09 | 1.00000 |
| rad65     | 1.78385e-09 | 1.00000 | 1.78394e-09 | 1.00000 |
| PAH8+H    | 1.24981e-09 | 1.00000 | 1.24987e-09 | 1.00000 |
| rad64     | 1.19311e-09 | 1.00000 | 1.19317e-09 | 1.00000 |
| rad42     | 5.61778e-10 | 1.00000 | 5.61806e-10 | 1.00000 |
| rad68syn  | 5.31777e-10 | 1.00000 | 5.31804e-10 | 1.00000 |
| rad68anti | 3.50889e-10 | 1.00000 | 3.50907e-10 | 1.00000 |
| rad73     | 3.32910e-10 | 1.00000 | 3.32927e-10 | 1.00000 |
| rad71     | 2.96145e-10 | 1.00000 | 2.96160e-10 | 1.00000 |
| rad40syn  | 2.67659e-10 | 1.00000 | 2.67672e-10 | 1.00000 |
| rad40anti | 2.04456e-10 | 1.00000 | 2.04466e-10 | 1.00000 |
| rad72     | 3.56687e-12 | 1.00000 | 3.56704e-12 | 1.00000 |
| rad9      | 4.00236e-14 | 1.00000 | 4.00257e-14 | 1.00000 |
| rad12     | 7.93739e-17 | 1.00000 | 7.93778e-17 | 1.00000 |
| rad15     | 4.80946e-18 | 1.00000 | 4.80970e-18 | 1.00000 |
| rad23     | 3.69802e-18 | 1.00000 | 3.69820e-18 | 1.00000 |
| rad19anti | 2.56276e-18 | 1.00000 | 2.56289e-18 | 1.00000 |
| rad45     | 2.19640e-18 | 1.00000 | 2.19651e-18 | 1.00000 |
| rad2      | 1.59802e-18 | 1.00000 | 1.59810e-18 | 1.00000 |
| rad1      | 4.72398e-19 | 1.00000 | 4.72422e-19 | 1.00000 |
| rad36     | 2.28909e-19 | 1.00000 | 2.28920e-19 | 1.00000 |
| rad19syn  | 1.28391e-19 | 1.00000 | 1.28398e-19 | 1.00000 |
| rad21     | 9.63737e-20 | 1.00000 | 9.63784e-20 | 1.00000 |
| rad8      | 7.65078e-20 | 1.00000 | 7.65117e-20 | 1.00000 |
| rad6      | 3.62741e-20 | 1.00000 | 3.62759e-20 | 1.00000 |
| rad10     | 3.23307e-20 | 1.00000 | 3.23323e-20 | 1.00000 |
| rad13     | 3.15540e-20 | 1.00000 | 3.15556e-20 | 1.00000 |
| rad20     | 2.48655e-20 | 1.00000 | 2.48667e-20 | 1.00000 |
| rad3      | 1.49960e-20 | 1.00000 | 1.49967e-20 | 1.00000 |
| rad4      | 1.23488e-20 | 1.00000 | 1.23495e-20 | 1.00000 |
| rad33     | 8.69060e-21 | 1.00000 | 8.69109e-21 | 1.00000 |
| rad24     | 7.72326e-21 | 1.00000 | 7.72364e-21 | 1.00000 |
| rad11     | 5.52949e-21 | 1.00000 | 5.52977e-21 | 1.00000 |
| rad25     | 7.88055e-22 | 1.00000 | 7.88094e-22 | 1.00000 |
| rad27     | 4.73302e-22 | 1.00000 | 4.73325e-22 | 1.00000 |
| rad31     | 2.41068e-22 | 1.00000 | 2.41079e-22 | 1.00000 |
| rad7      | 1.91695e-22 | 1.00000 | 1.91705e-22 | 1.00000 |
| rad18     | 4.94611e-23 | 1.00000 | 4.94635e-23 | 1.00000 |
| rad14     | 3.73375e-23 | 1.00000 | 3.73394e-23 | 1.00000 |
| rad47     | 5.24230e-24 | 1.00000 | 5.24256e-24 | 1.00000 |
| rad26     | 4.29542e-25 | 1.00000 | 4.29563e-25 | 1.00000 |
| rad28     | 1.22083e-25 | 1.00000 | 1.22089e-25 | 1.00000 |
| rad22     | 3.28995e-26 | 1.00000 | 3.29011e-26 | 1.00000 |
| rad5      | 8.55094e-30 | 1.00000 | 8.55135e-30 | 1.00000 |

0.100000000E-07 Pa, 1200.00000 K

| Rate constant             | True (fraction)       | Effective (fraction)  |  |  |
|---------------------------|-----------------------|-----------------------|--|--|
| Total                     | 3.72623e-12 (1.00 )   | 3.72576e-12 (1.00 )   |  |  |
| Formation of rad19        | 2.86288e-12 (0.768 )  | 2.86245e-12 (0.768 )  |  |  |
| H-abstraction to cyc2enyl | 6.53266e-13 (0.175 )  | 6.53266e-13 (0.175 )  |  |  |
| H-abstraction to cyclenyl | 2.10085e-13 (0.0564 ) | 2.10053e-13 (0.0564 ) |  |  |

  

| species                       | PYtrue      | Cumul    | PYeffective | Cumul    |
|-------------------------------|-------------|----------|-------------|----------|
| Indene+H                      | 0.687506    | 0.687506 | 0.687593    | 0.687593 |
| Benzene+cycloprop-2-enylidene | 0.175315    | 0.862821 | 0.175337    | 0.862930 |
| PhCHCCH2+H                    | 0.0694470   | 0.932268 | 0.0694557   | 0.932386 |
| Benzene+cycloprop-1-enylidene | 0.0563801   | 0.988648 | 0.0563786   | 0.988764 |
| Ph+MeAc                       | 0.00227272  | 0.990921 | 0.00227301  | 0.991037 |
| C2H2+PhCH2                    | 0.00219121  | 0.993112 | 0.00219148  | 0.993229 |
| Ph+Allene                     | 0.00207994  | 0.995192 | 0.00208020  | 0.995309 |
| PhCH2CCH+H                    | 0.00110691  | 0.996299 | 0.00110706  | 0.996416 |
| PhCCCH3+H                     | 0.00101200  | 0.997311 | 0.00101213  | 0.997428 |
| rad67                         | 0.000806305 | 0.998117 | 0.000806406 | 0.998235 |
| PhCCH+CH3                     | 0.000645716 | 0.998763 | 0.000645798 | 0.998880 |
| PhcycC3H3_A+H                 | 0.000345598 | 0.999109 | 0.000345641 | 0.999226 |
| rad35                         | 0.000290169 | 0.999399 | 0.000290206 | 0.999516 |
| PhcycC3H3_B+H                 | 0.000261273 | 0.999660 | 0.000261306 | 0.999778 |
| Phenyl+cycC3H4                | 0.000117514 | 0.999778 | 0.000000    | 0.999778 |
| PAH7+H                        | 6.09151e-05 | 0.999838 | 6.09229e-05 | 0.999839 |
| rad37                         | 5.50993e-05 | 0.999894 | 5.51063e-05 | 0.999894 |
| PAH10+CH3                     | 4.81021e-05 | 0.999942 | 4.81082e-05 | 0.999942 |
| PAH9+H                        | 1.22285e-05 | 0.999954 | 1.22300e-05 | 0.999954 |
| rad38                         | 1.12958e-05 | 0.999965 | 1.12972e-05 | 0.999965 |
| rad39                         | 1.06983e-05 | 0.999976 | 1.06996e-05 | 0.999976 |
| rad30                         | 1.03391e-05 | 0.999986 | 1.03403e-05 | 0.999986 |
| PAH3+H                        | 6.91379e-06 | 0.999993 | 6.91466e-06 | 0.999993 |

|           |             |          |             |          |
|-----------|-------------|----------|-------------|----------|
| rad46     | 1.50176e-06 | 0.999995 | 1.50195e-06 | 0.999995 |
| rad50     | 8.20642e-07 | 0.999995 | 8.20743e-07 | 0.999996 |
| rad54     | 7.81497e-07 | 0.999996 | 7.81598e-07 | 0.999996 |
| rad60syn  | 7.65102e-07 | 0.999997 | 7.65199e-07 | 0.999997 |
| rad59     | 7.35018e-07 | 0.999998 | 7.35111e-07 | 0.999998 |
| PAH1+H    | 6.15259e-07 | 0.999998 | 6.15337e-07 | 0.999998 |
| rad60anti | 4.66711e-07 | 0.999999 | 4.66769e-07 | 0.999999 |
| rad43     | 2.45550e-07 | 0.999999 | 2.45581e-07 | 0.999999 |
| rad70     | 1.92605e-07 | 0.999999 | 1.92629e-07 | 0.999999 |
| rad51     | 1.60721e-07 | 0.999999 | 1.60741e-07 | 1.000000 |
| rad52     | 5.89508e-08 | 1.000000 | 5.89583e-08 | 1.000000 |
| rad55     | 4.99974e-08 | 1.000000 | 5.00038e-08 | 1.000000 |
| rad58     | 4.53331e-08 | 1.000000 | 4.53389e-08 | 1.000000 |
| rad34     | 3.98655e-08 | 1.000000 | 3.98705e-08 | 1.000000 |
| rad61     | 3.33579e-08 | 1.000000 | 3.33621e-08 | 1.000000 |
| rad62     | 2.11968e-08 | 1.000000 | 2.11994e-08 | 1.000000 |
| rad41     | 1.09917e-08 | 1.000000 | 1.09931e-08 | 1.000000 |
| rad53     | 7.65059e-09 | 1.000000 | 7.65156e-09 | 1.000000 |
| rad56     | 5.79402e-09 | 1.000000 | 5.79474e-09 | 1.000000 |
| rad65     | 4.84114e-09 | 1.000000 | 4.84175e-09 | 1.000000 |
| PAH8+H    | 4.08163e-09 | 1.000000 | 4.08215e-09 | 1.000000 |
| rad64     | 2.59994e-09 | 1.000000 | 2.60027e-09 | 1.000000 |
| rad68syn  | 1.43965e-09 | 1.000000 | 1.43983e-09 | 1.000000 |
| rad73     | 1.32831e-09 | 1.000000 | 1.32847e-09 | 1.000000 |
| rad71     | 1.32075e-09 | 1.000000 | 1.32091e-09 | 1.000000 |
| rad42     | 1.07985e-09 | 1.000000 | 1.07999e-09 | 1.000000 |
| rad68anti | 9.46805e-10 | 1.000000 | 9.46926e-10 | 1.000000 |
| rad40syn  | 8.05959e-10 | 1.000000 | 8.06061e-10 | 1.000000 |
| rad40anti | 6.21769e-10 | 1.000000 | 6.21848e-10 | 1.000000 |
| rad72     | 2.08613e-11 | 1.000000 | 2.08640e-11 | 1.000000 |
| rad9      | 2.91881e-14 | 1.000000 | 2.91918e-14 | 1.000000 |
| rad12     | 7.13600e-17 | 1.000000 | 7.13690e-17 | 1.000000 |
| rad15     | 3.78825e-18 | 1.000000 | 3.78873e-18 | 1.000000 |
| rad23     | 3.40131e-18 | 1.000000 | 3.40174e-18 | 1.000000 |
| rad45     | 2.14280e-18 | 1.000000 | 2.14307e-18 | 1.000000 |
| rad19anti | 1.93811e-18 | 1.000000 | 1.93836e-18 | 1.000000 |
| rad2      | 1.22097e-18 | 1.000000 | 1.22113e-18 | 1.000000 |
| rad1      | 3.58439e-19 | 1.000000 | 3.58484e-19 | 1.000000 |
| rad8      | 2.53541e-19 | 1.000000 | 2.53574e-19 | 1.000000 |
| rad36     | 2.22523e-19 | 1.000000 | 2.22552e-19 | 1.000000 |
| rad21     | 2.06285e-19 | 1.000000 | 2.06311e-19 | 1.000000 |
| rad13     | 1.26206e-19 | 1.000000 | 1.26222e-19 | 1.000000 |
| rad19syn  | 1.13955e-19 | 1.000000 | 1.13970e-19 | 1.000000 |
| rad11     | 9.72520e-20 | 1.000000 | 9.72648e-20 | 1.000000 |
| rad6      | 8.05137e-20 | 1.000000 | 8.05239e-20 | 1.000000 |
| rad20     | 5.30461e-20 | 1.000000 | 5.30528e-20 | 1.000000 |
| rad10     | 3.08205e-20 | 1.000000 | 3.08243e-20 | 1.000000 |
| rad33     | 1.49700e-20 | 1.000000 | 1.49719e-20 | 1.000000 |
| rad24     | 1.18501e-20 | 1.000000 | 1.18516e-20 | 1.000000 |
| rad3      | 1.06596e-20 | 1.000000 | 1.06609e-20 | 1.000000 |
| rad4      | 8.73294e-21 | 1.000000 | 8.73401e-21 | 1.000000 |
| rad7      | 6.82913e-21 | 1.000000 | 6.82999e-21 | 1.000000 |
| rad25     | 2.92600e-21 | 1.000000 | 2.92637e-21 | 1.000000 |
| rad18     | 1.64154e-21 | 1.000000 | 1.64175e-21 | 1.000000 |
| rad27     | 1.52386e-21 | 1.000000 | 1.52405e-21 | 1.000000 |
| rad31     | 2.55729e-22 | 1.000000 | 2.55762e-22 | 1.000000 |
| rad14     | 1.32731e-22 | 1.000000 | 1.32747e-22 | 1.000000 |
| rad47     | 1.43379e-23 | 1.000000 | 1.43397e-23 | 1.000000 |
| rad26     | 5.33362e-24 | 1.000000 | 5.33429e-24 | 1.000000 |
| rad28     | 1.76749e-25 | 1.000000 | 1.76771e-25 | 1.000000 |
| rad22     | 3.70430e-26 | 1.000000 | 3.70477e-26 | 1.000000 |
| rad5      | 4.22591e-28 | 1.000000 | 4.22645e-28 | 1.000000 |

0.100000000E-07 Pa, 1300.00000 K

=====

| Rate constant             | True (fraction)       | Effective (fraction)  |
|---------------------------|-----------------------|-----------------------|
| Total                     | 4.84401e-12 (1.00 )   | 4.84262e-12 (1.00 )   |
| Formation of rad19        | 3.55537e-12 (0.734 )  | 3.55411e-12 (0.734 )  |
| H-abstraction to cyc2enyl | 9.48893e-13 (0.196 )  | 9.48893e-13 (0.196 )  |
| H-abstraction to cyc1enyl | 3.39740e-13 (0.0701 ) | 3.39620e-13 (0.0701 ) |

| species                       | PYtrue     | Cumul    | PYeffective | Cumul    |
|-------------------------------|------------|----------|-------------|----------|
| Indene+H                      | 0.627161   | 0.627161 | 0.627340    | 0.627340 |
| Benzene+cycloprop-2-enylidene | 0.195890   | 0.823052 | 0.195946    | 0.823286 |
| PhCHCCH2+H                    | 0.0908777  | 0.913929 | 0.0909037   | 0.914190 |
| Benzene+cycloprop-1-enylidene | 0.0701362  | 0.984065 | 0.0701313   | 0.984321 |
| Ph+MeAc                       | 0.00304441 | 0.987110 | 0.00304527  | 0.987366 |
| C2H2+PhCH2                    | 0.00290372 | 0.990014 | 0.00290454  | 0.990271 |



|                |             |          |             |          |
|----------------|-------------|----------|-------------|----------|
| Ph+Allene      | 0.00288470  | 0.992898 | 0.00288553  | 0.993157 |
| PhCH2CCH+H     | 0.00165448  | 0.994553 | 0.00165495  | 0.994812 |
| PhCCCH3+H      | 0.00130153  | 0.995854 | 0.00130190  | 0.996113 |
| rad67          | 0.00110883  | 0.996963 | 0.00110915  | 0.997223 |
| PhCCH+CH3      | 0.000809514 | 0.997773 | 0.000809751 | 0.998032 |
| PhcycC3H3_A+H  | 0.000673391 | 0.998446 | 0.000673584 | 0.998706 |
| PhcycC3H3_B+H  | 0.000561394 | 0.999007 | 0.000561554 | 0.999267 |
| rad35          | 0.000398725 | 0.999406 | 0.000398838 | 0.999666 |
| Phenyl+cycC3H4 | 0.000260506 | 0.999667 | 0.000000    | 0.999666 |
| PAH10+CH3      | 8.38007e-05 | 0.999750 | 8.38250e-05 | 0.999750 |
| PAH7+H         | 7.89117e-05 | 0.999829 | 7.89341e-05 | 0.999829 |
| rad37          | 7.83568e-05 | 0.999908 | 7.83785e-05 | 0.999907 |
| PAH9+H         | 2.08511e-05 | 0.999929 | 2.08571e-05 | 0.999928 |
| rad38          | 1.88167e-05 | 0.999947 | 1.88221e-05 | 0.999947 |
| rad30          | 1.49360e-05 | 0.999962 | 1.49402e-05 | 0.999962 |
| rad39          | 1.33374e-05 | 0.999976 | 1.33412e-05 | 0.999975 |
| PAH3+H         | 1.25732e-05 | 0.999988 | 1.25768e-05 | 0.999988 |
| rad46          | 2.73965e-06 | 0.999991 | 2.74043e-06 | 0.999991 |
| rad50          | 1.75696e-06 | 0.999993 | 1.75746e-06 | 0.999992 |
| rad59          | 1.29584e-06 | 0.999994 | 1.29620e-06 | 0.999994 |
| rad60syn       | 1.24692e-06 | 0.999995 | 1.24728e-06 | 0.999995 |
| rad54          | 1.23055e-06 | 0.999996 | 1.23091e-06 | 0.999996 |
| PAH1+H         | 1.18164e-06 | 0.999998 | 1.18197e-06 | 0.999997 |
| rad60anti      | 7.66599e-07 | 0.999998 | 7.66824e-07 | 0.999998 |
| rad43          | 4.10006e-07 | 0.999999 | 4.10123e-07 | 0.999999 |
| rad51          | 3.87406e-07 | 0.999999 | 3.87517e-07 | 0.999999 |
| rad70          | 3.43677e-07 | 1.000000 | 3.43775e-07 | 0.999999 |
| rad52          | 1.33628e-07 | 1.000000 | 1.33666e-07 | 0.999999 |
| rad58          | 9.48433e-08 | 1.000000 | 9.48705e-08 | 1.000000 |
| rad55          | 8.22139e-08 | 1.000000 | 8.22375e-08 | 1.000000 |
| rad34          | 7.56235e-08 | 1.000000 | 7.56447e-08 | 1.000000 |
| rad61          | 7.45086e-08 | 1.000000 | 7.45298e-08 | 1.000000 |
| rad62          | 3.23565e-08 | 1.000000 | 3.23657e-08 | 1.000000 |
| rad41          | 2.13212e-08 | 1.000000 | 2.13273e-08 | 1.000000 |
| rad53          | 1.49188e-08 | 1.000000 | 1.49231e-08 | 1.000000 |
| rad56          | 1.23746e-08 | 1.000000 | 1.23782e-08 | 1.000000 |
| rad65          | 1.15036e-08 | 1.000000 | 1.15069e-08 | 1.000000 |
| PAH8+H         | 1.11832e-08 | 1.000000 | 1.11864e-08 | 1.000000 |
| rad64          | 5.02551e-09 | 1.000000 | 5.02694e-09 | 1.000000 |
| rad71          | 4.76253e-09 | 1.000000 | 4.76388e-09 | 1.000000 |
| rad73          | 4.36513e-09 | 1.000000 | 4.36638e-09 | 1.000000 |
| rad68syn       | 3.35945e-09 | 1.000000 | 3.36041e-09 | 1.000000 |
| rad68anti      | 2.20311e-09 | 1.000000 | 2.20373e-09 | 1.000000 |
| rad40syn       | 2.06131e-09 | 1.000000 | 2.06190e-09 | 1.000000 |
| rad42          | 1.87919e-09 | 1.000000 | 1.87972e-09 | 1.000000 |
| rad40anti      | 1.60444e-09 | 1.000000 | 1.60490e-09 | 1.000000 |
| rad72          | 9.34613e-11 | 1.000000 | 9.34878e-11 | 1.000000 |
| rad9           | 1.93810e-14 | 1.000000 | 1.93865e-14 | 1.000000 |
| rad12          | 5.89852e-17 | 1.000000 | 5.90020e-17 | 1.000000 |
| rad15          | 9.39905e-18 | 1.000000 | 9.40177e-18 | 1.000000 |
| rad23          | 3.07829e-18 | 1.000000 | 3.07916e-18 | 1.000000 |
| rad45          | 2.02737e-18 | 1.000000 | 2.02795e-18 | 1.000000 |
| rad19anti      | 1.48394e-18 | 1.000000 | 1.48436e-18 | 1.000000 |
| rad2           | 9.09180e-19 | 1.000000 | 9.09440e-19 | 1.000000 |
| rad11          | 5.69961e-19 | 1.000000 | 5.70123e-19 | 1.000000 |
| rad8           | 4.42248e-19 | 1.000000 | 4.42375e-19 | 1.000000 |
| rad21          | 3.03536e-19 | 1.000000 | 3.03622e-19 | 1.000000 |
| rad1           | 2.68284e-19 | 1.000000 | 2.68361e-19 | 1.000000 |
| rad13          | 2.24558e-19 | 1.000000 | 2.24623e-19 | 1.000000 |
| rad36          | 2.11041e-19 | 1.000000 | 2.11101e-19 | 1.000000 |
| rad6           | 1.69134e-19 | 1.000000 | 1.69182e-19 | 1.000000 |
| rad19syn       | 1.00706e-19 | 1.000000 | 1.00735e-19 | 1.000000 |
| rad7           | 8.18682e-20 | 1.000000 | 8.18918e-20 | 1.000000 |
| rad20          | 7.38165e-20 | 1.000000 | 7.38377e-20 | 1.000000 |
| rad10          | 7.03487e-20 | 1.000000 | 7.03688e-20 | 1.000000 |
| rad33          | 1.76734e-20 | 1.000000 | 1.76784e-20 | 1.000000 |
| rad18          | 1.53527e-20 | 1.000000 | 1.53571e-20 | 1.000000 |
| rad24          | 1.53474e-20 | 1.000000 | 1.53518e-20 | 1.000000 |
| rad3           | 7.48000e-21 | 1.000000 | 7.48212e-21 | 1.000000 |
| rad4           | 6.10240e-21 | 1.000000 | 6.10414e-21 | 1.000000 |
| rad25          | 5.66799e-21 | 1.000000 | 5.66960e-21 | 1.000000 |
| rad27          | 2.70870e-21 | 1.000000 | 2.70948e-21 | 1.000000 |
| rad31          | 2.62744e-22 | 1.000000 | 2.62819e-22 | 1.000000 |
| rad14          | 2.40834e-22 | 1.000000 | 2.40903e-22 | 1.000000 |
| rad26          | 1.21067e-22 | 1.000000 | 1.21102e-22 | 1.000000 |
| rad47          | 3.40948e-23 | 1.000000 | 3.41046e-23 | 1.000000 |
| rad28          | 1.73666e-24 | 1.000000 | 1.73715e-24 | 1.000000 |
| rad22          | 1.42249e-25 | 1.000000 | 1.42289e-25 | 1.000000 |
| rad5           | 2.36503e-26 | 1.000000 | 2.36570e-26 | 1.000000 |

0.100000000E-07 Pa, 1400.00000 K

| Rate constant             | True (fraction)       | Effective (fraction)  |
|---------------------------|-----------------------|-----------------------|
| Total                     | 6.19360e-12 (1.00 )   | 6.18997e-12 (1.00 )   |
| Formation of rad19        | 4.34185e-12 (0.701 )  | 4.33861e-12 (0.701 )  |
| H-abstraction to cyc2enyl | 1.32990e-12 (0.215 )  | 1.32990e-12 (0.215 )  |
| H-abstraction to cyclenyl | 5.21850e-13 (0.0843 ) | 5.21461e-13 (0.0842 ) |

| species                       | PYtrue      | Cumul    | PYeffective | Cumul    |
|-------------------------------|-------------|----------|-------------|----------|
| Indene+H                      | 0.566028    | 0.566028 | 0.566360    | 0.566360 |
| Benzene+cycloprop-2-enylidene | 0.214721    | 0.780749 | 0.214847    | 0.781207 |
| PhCHCCH2+H                    | 0.113526    | 0.894275 | 0.113593    | 0.894800 |
| Benzene+cycloprop-1-enylidene | 0.0842564   | 0.978532 | 0.0842429   | 0.979043 |
| Ph+MeAc                       | 0.00387284  | 0.982405 | 0.00387511  | 0.982918 |
| Ph+Allene                     | 0.00376036  | 0.986165 | 0.00376256  | 0.986680 |
| C2H2+PhCH2                    | 0.00367929  | 0.989844 | 0.00368145  | 0.990362 |
| PhCH2CCH+H                    | 0.00231297  | 0.992157 | 0.00231433  | 0.992676 |
| PhCCCH3+H                     | 0.00159640  | 0.993754 | 0.00159734  | 0.994274 |
| rad67                         | 0.00144409  | 0.995198 | 0.00144494  | 0.995719 |
| PhcycC3H3_A+H                 | 0.00120489  | 0.996403 | 0.00120559  | 0.996924 |
| PhcycC3H3_B+H                 | 0.00109183  | 0.997495 | 0.00109247  | 0.998017 |
| PhCCH+CH3                     | 0.000988680 | 0.998483 | 0.000989264 | 0.999006 |
| Phenyl+cycC3H4                | 0.000523345 | 0.999007 | 0.000000    | 0.999006 |
| rad35                         | 0.000519418 | 0.999526 | 0.000519722 | 0.999526 |
| PAH10+CH3                     | 0.000132940 | 0.999659 | 0.000133019 | 0.999659 |
| rad37                         | 0.000103969 | 0.999763 | 0.000104030 | 0.999763 |
| PAH7+H                        | 9.76629e-05 | 0.999861 | 9.77202e-05 | 0.999860 |
| PAH9+H                        | 3.30451e-05 | 0.999894 | 3.30646e-05 | 0.999893 |
| rad38                         | 2.89869e-05 | 0.999923 | 2.90039e-05 | 0.999922 |
| PAH3+H                        | 2.09773e-05 | 0.999944 | 2.09896e-05 | 0.999943 |
| rad30                         | 2.03484e-05 | 0.999964 | 2.03603e-05 | 0.999964 |
| rad39                         | 1.60326e-05 | 0.999980 | 1.60420e-05 | 0.999980 |
| rad46                         | 4.60489e-06 | 0.999985 | 4.60759e-06 | 0.999984 |
| rad50                         | 3.39256e-06 | 0.999988 | 3.39455e-06 | 0.999988 |
| rad59                         | 2.10237e-06 | 0.999990 | 2.10360e-06 | 0.999990 |
| PAH1+H                        | 2.05214e-06 | 0.999992 | 2.05334e-06 | 0.999992 |
| rad60syn                      | 1.88965e-06 | 0.999994 | 1.89076e-06 | 0.999994 |
| rad54                         | 1.78086e-06 | 0.999996 | 1.78190e-06 | 0.999996 |
| rad60anti                     | 1.16973e-06 | 0.999997 | 1.17042e-06 | 0.999997 |
| rad51                         | 8.27129e-07 | 0.999998 | 8.27613e-07 | 0.999998 |
| rad43                         | 6.31782e-07 | 0.999998 | 6.32153e-07 | 0.999998 |
| rad70                         | 5.60217e-07 | 0.999999 | 5.60546e-07 | 0.999999 |
| rad52                         | 2.70713e-07 | 0.999999 | 2.70872e-07 | 0.999999 |
| rad58                         | 1.78428e-07 | 0.999999 | 1.78532e-07 | 0.999999 |
| rad61                         | 1.46277e-07 | 1.000000 | 1.46363e-07 | 0.999999 |
| rad34                         | 1.30056e-07 | 1.000000 | 1.30132e-07 | 1.000000 |
| rad55                         | 1.23571e-07 | 1.000000 | 1.23644e-07 | 1.000000 |
| rad62                         | 4.61529e-08 | 1.000000 | 4.61799e-08 | 1.000000 |
| rad41                         | 3.74002e-08 | 1.000000 | 3.74221e-08 | 1.000000 |
| PAH8+H                        | 2.63148e-08 | 1.000000 | 2.63303e-08 | 1.000000 |
| rad53                         | 2.60384e-08 | 1.000000 | 2.60537e-08 | 1.000000 |
| rad65                         | 2.42340e-08 | 1.000000 | 2.42482e-08 | 1.000000 |
| rad56                         | 2.33522e-08 | 1.000000 | 2.33659e-08 | 1.000000 |
| rad71                         | 1.41523e-08 | 1.000000 | 1.41606e-08 | 1.000000 |
| rad73                         | 1.20322e-08 | 1.000000 | 1.20393e-08 | 1.000000 |
| rad64                         | 8.79755e-09 | 1.000000 | 8.80273e-09 | 1.000000 |
| rad68syn                      | 6.90097e-09 | 1.000000 | 6.90502e-09 | 1.000000 |
| rad40syn                      | 4.57744e-09 | 1.000000 | 4.58013e-09 | 1.000000 |
| rad68anti                     | 4.51464e-09 | 1.000000 | 4.51729e-09 | 1.000000 |
| rad40anti                     | 3.59045e-09 | 1.000000 | 3.59256e-09 | 1.000000 |
| rad42                         | 3.00666e-09 | 1.000000 | 3.00843e-09 | 1.000000 |
| rad72                         | 3.28506e-10 | 1.000000 | 3.28699e-10 | 1.000000 |
| rad9                          | 1.23912e-14 | 1.000000 | 1.23985e-14 | 1.000000 |
| rad12                         | 4.68956e-17 | 1.000000 | 4.69231e-17 | 1.000000 |
| rad15                         | 3.61840e-17 | 1.000000 | 3.62052e-17 | 1.000000 |
| rad23                         | 2.75752e-18 | 1.000000 | 2.75914e-18 | 1.000000 |
| rad45                         | 1.87368e-18 | 1.000000 | 1.87478e-18 | 1.000000 |
| rad11                         | 1.44856e-18 | 1.000000 | 1.44941e-18 | 1.000000 |
| rad19anti                     | 1.15118e-18 | 1.000000 | 1.15186e-18 | 1.000000 |
| rad2                          | 6.74487e-19 | 1.000000 | 6.74882e-19 | 1.000000 |
| rad8                          | 5.66687e-19 | 1.000000 | 5.67019e-19 | 1.000000 |
| rad21                         | 3.67060e-19 | 1.000000 | 3.67275e-19 | 1.000000 |
| rad7                          | 3.48136e-19 | 1.000000 | 3.48340e-19 | 1.000000 |
| rad6                          | 2.99717e-19 | 1.000000 | 2.99892e-19 | 1.000000 |
| rad13                         | 2.61024e-19 | 1.000000 | 2.61177e-19 | 1.000000 |
| rad10                         | 2.47052e-19 | 1.000000 | 2.47198e-19 | 1.000000 |
| rad1                          | 2.00661e-19 | 1.000000 | 2.00779e-19 | 1.000000 |
| rad36                         | 1.96189e-19 | 1.000000 | 1.96304e-19 | 1.000000 |

|          |             |         |             |          |
|----------|-------------|---------|-------------|----------|
| rad19syn | 8.90593e-20 | 1.00000 | 8.91116e-20 | 1.000000 |
| rad20    | 8.28826e-20 | 1.00000 | 8.29310e-20 | 1.000000 |
| rad18    | 5.37818e-20 | 1.00000 | 5.38134e-20 | 1.000000 |
| rad24    | 1.80313e-20 | 1.00000 | 1.80420e-20 | 1.000000 |
| rad33    | 1.72625e-20 | 1.00000 | 1.72727e-20 | 1.000000 |
| rad25    | 7.72646e-21 | 1.00000 | 7.73097e-21 | 1.000000 |
| rad3     | 5.33339e-21 | 1.00000 | 5.33652e-21 | 1.000000 |
| rad4     | 4.31136e-21 | 1.00000 | 4.31390e-21 | 1.000000 |
| rad27    | 3.50744e-21 | 1.00000 | 3.50950e-21 | 1.000000 |
| rad26    | 2.23042e-21 | 1.00000 | 2.23173e-21 | 1.000000 |
| rad14    | 3.02573e-22 | 1.00000 | 3.02750e-22 | 1.000000 |
| rad31    | 2.62635e-22 | 1.00000 | 2.62789e-22 | 1.000000 |
| rad47    | 7.15113e-23 | 1.00000 | 7.15531e-23 | 1.000000 |
| rad28    | 3.00926e-23 | 1.00000 | 3.01103e-23 | 1.000000 |
| rad22    | 8.46295e-24 | 1.00000 | 8.46797e-24 | 1.000000 |
| rad5     | 1.05698e-24 | 1.00000 | 1.05760e-24 | 1.000000 |

0.100000000E-07 Pa, 1500.00000 K

| Rate constant             | True (fraction)       | Effective (fraction)  |
|---------------------------|-----------------------|-----------------------|
| Total                     | 7.80417e-12 (1.00 )   | 7.79561e-12 (1.00 )   |
| Formation of rad19        | 5.22661e-12 (0.670 )  | 5.21915e-12 (0.669 )  |
| H-abstraction to cyc2enyl | 1.80920e-12 (0.232 )  | 1.80920e-12 (0.232 )  |
| H-abstraction to cyclenyl | 7.68359e-13 (0.0985 ) | 7.67262e-13 (0.0984 ) |

| species                       | PYtrue      | Cumul    | PYeffective | Cumul    |
|-------------------------------|-------------|----------|-------------|----------|
| Indene+H                      | 0.505870    | 0.505870 | 0.506425    | 0.506425 |
| Benzene+cycloprop-2-enylidene | 0.231825    | 0.737695 | 0.232079    | 0.738505 |
| PhCHCCH2+H                    | 0.135967    | 0.873662 | 0.136116    | 0.874621 |
| Benzene+cycloprop-1-enylidene | 0.0984549   | 0.972117 | 0.0984223   | 0.973043 |
| Ph+MeAc                       | 0.00470570  | 0.976823 | 0.00471086  | 0.977754 |
| Ph+Allene                     | 0.00464760  | 0.981470 | 0.00465271  | 0.982407 |
| C2H2+PhCH2                    | 0.00447301  | 0.985943 | 0.00447791  | 0.986885 |
| PhCH2CCH+H                    | 0.00304819  | 0.988991 | 0.00305154  | 0.989936 |
| PhcycC3H3_A+H                 | 0.00198976  | 0.990981 | 0.00199195  | 0.991928 |
| PhcycC3H3_B+H                 | 0.00193280  | 0.992914 | 0.00193492  | 0.993863 |
| PhCCH3+H                      | 0.00187667  | 0.994791 | 0.00187873  | 0.995742 |
| rad67                         | 0.00179097  | 0.996582 | 0.00179294  | 0.997535 |
| PhCCH+CH3                     | 0.00117783  | 0.997759 | 0.00117912  | 0.998714 |
| Phenyl+cycC3H4                | 0.000956146 | 0.998716 | 0.000000    | 0.998714 |
| rad35                         | 0.000644848 | 0.999360 | 0.000645555 | 0.999360 |
| PAH10+CH3                     | 0.000194190 | 0.999555 | 0.000194404 | 0.999554 |
| rad37                         | 0.000129806 | 0.999684 | 0.000129949 | 0.999684 |
| PAH7+H                        | 0.000116417 | 0.999801 | 0.000116546 | 0.999800 |
| PAH9+H                        | 4.88535e-05 | 0.999850 | 4.89071e-05 | 0.999849 |
| rad38                         | 4.16011e-05 | 0.999891 | 4.16467e-05 | 0.999891 |
| PAH3+H                        | 3.23374e-05 | 0.999924 | 3.23729e-05 | 0.999923 |
| rad30                         | 2.62808e-05 | 0.999950 | 2.63097e-05 | 0.999950 |
| rad39                         | 1.87895e-05 | 0.999969 | 1.88102e-05 | 0.999968 |
| rad46                         | 7.16199e-06 | 0.999976 | 7.16986e-06 | 0.999976 |
| rad50                         | 5.93797e-06 | 0.999982 | 5.94449e-06 | 0.999982 |
| PAH1+H                        | 3.25722e-06 | 0.999985 | 3.26081e-06 | 0.999985 |
| rad59                         | 3.16156e-06 | 0.999988 | 3.16503e-06 | 0.999988 |
| rad60syn                      | 2.67968e-06 | 0.999991 | 2.68262e-06 | 0.999991 |
| rad54                         | 2.39838e-06 | 0.999993 | 2.40102e-06 | 0.999993 |
| rad60anti                     | 1.66867e-06 | 0.999995 | 1.67050e-06 | 0.999995 |
| rad51                         | 1.57342e-06 | 0.999996 | 1.57515e-06 | 0.999996 |
| rad43                         | 9.05576e-07 | 0.999997 | 9.06568e-07 | 0.999997 |
| rad70                         | 8.42763e-07 | 0.999998 | 8.43688e-07 | 0.999998 |
| rad52                         | 4.92950e-07 | 0.999999 | 4.93491e-07 | 0.999999 |
| rad58                         | 3.04448e-07 | 0.999999 | 3.04782e-07 | 0.999999 |
| rad61                         | 2.56145e-07 | 0.999999 | 2.56426e-07 | 0.999999 |
| rad34                         | 2.04934e-07 | 1.000000 | 2.05159e-07 | 0.999999 |
| rad55                         | 1.72012e-07 | 1.000000 | 1.72201e-07 | 1.000000 |
| rad62                         | 6.20586e-08 | 1.000000 | 6.21267e-08 | 1.000000 |
| rad41                         | 5.99063e-08 | 1.000000 | 5.99721e-08 | 1.000000 |
| PAH8+H                        | 5.38671e-08 | 1.000000 | 5.39262e-08 | 1.000000 |
| rad65                         | 4.55485e-08 | 1.000000 | 4.55985e-08 | 1.000000 |
| rad53                         | 4.12866e-08 | 1.000000 | 4.13319e-08 | 1.000000 |
| rad56                         | 3.95671e-08 | 1.000000 | 3.96105e-08 | 1.000000 |
| rad71                         | 3.49994e-08 | 1.000000 | 3.50378e-08 | 1.000000 |
| rad73                         | 2.80690e-08 | 1.000000 | 2.80998e-08 | 1.000000 |
| rad64                         | 1.41255e-08 | 1.000000 | 1.41409e-08 | 1.000000 |
| rad68syn                      | 1.26336e-08 | 1.000000 | 1.26475e-08 | 1.000000 |
| rad40syn                      | 8.93581e-09 | 1.000000 | 8.94564e-09 | 1.000000 |
| rad68anti                     | 8.24821e-09 | 1.000000 | 8.25726e-09 | 1.000000 |
| rad40anti                     | 7.05383e-09 | 1.000000 | 7.06153e-09 | 1.000000 |
| rad42                         | 4.46777e-09 | 1.000000 | 4.47268e-09 | 1.000000 |

|           |             |         |             |          |
|-----------|-------------|---------|-------------|----------|
| rad72     | 9.20557e-10 | 1.00000 | 9.21571e-10 | 1.000000 |
| rad9      | 7.84249e-15 | 1.00000 | 7.85107e-15 | 1.000000 |
| rad15     | 7.46906e-17 | 1.00000 | 7.47723e-17 | 1.000000 |
| rad12     | 3.66370e-17 | 1.00000 | 3.66772e-17 | 1.000000 |
| rad23     | 2.45285e-18 | 1.00000 | 2.45555e-18 | 1.000000 |
| rad11     | 2.20545e-18 | 1.00000 | 2.20786e-18 | 1.000000 |
| rad45     | 1.70436e-18 | 1.00000 | 1.70624e-18 | 1.000000 |
| rad19anti | 9.04718e-19 | 1.00000 | 9.05717e-19 | 1.000000 |
| rad7      | 7.03601e-19 | 1.00000 | 7.04373e-19 | 1.000000 |
| rad8      | 6.24614e-19 | 1.00000 | 6.25299e-19 | 1.000000 |
| rad10     | 5.35038e-19 | 1.00000 | 5.35625e-19 | 1.000000 |
| rad6      | 5.02371e-19 | 1.00000 | 5.02922e-19 | 1.000000 |
| rad2      | 4.96727e-19 | 1.00000 | 4.97273e-19 | 1.000000 |
| rad21     | 3.97611e-19 | 1.00000 | 3.98048e-19 | 1.000000 |
| rad13     | 2.43538e-19 | 1.00000 | 2.43805e-19 | 1.000000 |
| rad36     | 1.79538e-19 | 1.00000 | 1.79735e-19 | 1.000000 |
| rad1      | 1.49933e-19 | 1.00000 | 1.50098e-19 | 1.000000 |
| rad18     | 1.01390e-19 | 1.00000 | 1.01502e-19 | 1.000000 |
| rad20     | 8.29636e-20 | 1.00000 | 8.30546e-20 | 1.000000 |
| rad19syn  | 7.89908e-20 | 1.00000 | 7.90771e-20 | 1.000000 |
| rad26     | 2.48495e-20 | 1.00000 | 2.48768e-20 | 1.000000 |
| rad24     | 1.99082e-20 | 1.00000 | 1.99301e-20 | 1.000000 |
| rad33     | 1.52243e-20 | 1.00000 | 1.52410e-20 | 1.000000 |
| rad25     | 8.67515e-21 | 1.00000 | 8.68467e-21 | 1.000000 |
| rad27     | 3.81185e-21 | 1.00000 | 3.81603e-21 | 1.000000 |
| rad3      | 3.75307e-21 | 1.00000 | 3.75718e-21 | 1.000000 |
| rad4      | 3.00970e-21 | 1.00000 | 3.01300e-21 | 1.000000 |
| rad28     | 3.88548e-22 | 1.00000 | 3.88975e-22 | 1.000000 |
| rad14     | 3.12704e-22 | 1.00000 | 3.13047e-22 | 1.000000 |
| rad22     | 3.02557e-22 | 1.00000 | 3.02888e-22 | 1.000000 |
| rad31     | 2.56266e-22 | 1.00000 | 2.56547e-22 | 1.000000 |
| rad47     | 1.33181e-22 | 1.00000 | 1.33327e-22 | 1.000000 |
| rad5      | 2.77176e-23 | 1.00000 | 2.77481e-23 | 1.000000 |

0.100000000E-08 Pa, 20.0000000 K

=====

| Rate constant             | True (fraction)         | Effective (fraction)    |
|---------------------------|-------------------------|-------------------------|
| Total                     | 1.24541e-22 (1.00 )     | 1.24541e-22 (1.00 )     |
| Formation of rad19        | 1.24541e-22 (1.00 )     | 1.24541e-22 (1.00 )     |
| H-abstraction to cyc2enyl | 3.84323e-68 (3.09e-46)  | 3.84323e-68 (3.09e-46)  |
| H-abstraction to cyclenyl | 6.26313e-106 (5.03e-84) | 6.26313e-106 (5.03e-84) |

| species        | PYtrue      | Cumul    | PYeffective | Cumul    |
|----------------|-------------|----------|-------------|----------|
| Indene+H       | 0.999772    | 0.999772 | 0.999772    | 0.999772 |
| PhCHCCH2+H     | 0.000217190 | 0.999989 | 0.000217190 | 0.999989 |
| PhCCH+CH3      | 3.74993e-06 | 0.999993 | 3.74993e-06 | 0.999993 |
| C2H2+PhCH2     | 2.66078e-06 | 0.999996 | 2.66078e-06 | 0.999996 |
| PhCCCH3+H      | 2.10744e-06 | 0.999998 | 2.10744e-06 | 0.999998 |
| Ph+MeAc        | 1.55535e-06 | 0.999999 | 1.55535e-06 | 0.999999 |
| rad67          | 4.72017e-07 | 1.000000 | 4.72017e-07 | 1.000000 |
| rad35          | 2.09059e-07 | 1.000000 | 2.09059e-07 | 1.000000 |
| Ph+Allene      | 1.34639e-07 | 1.000000 | 1.34639e-07 | 1.000000 |
| PAH7+H         | 1.78373e-08 | 1.000000 | 1.78373e-08 | 1.000000 |
| PhCH2CCH+H     | 1.63595e-08 | 1.000000 | 1.63595e-08 | 1.000000 |
| rad39          | 5.03017e-09 | 1.000000 | 5.03017e-09 | 1.000000 |
| rad37          | 4.62673e-09 | 1.000000 | 4.62673e-09 | 1.000000 |
| rad30          | 3.90781e-09 | 1.000000 | 3.90781e-09 | 1.000000 |
| PAH9+H         | 2.53961e-10 | 1.000000 | 2.53961e-10 | 1.000000 |
| rad38          | 1.06938e-10 | 1.000000 | 1.06938e-10 | 1.000000 |
| rad60syn       | 1.69319e-11 | 1.000000 | 1.69319e-11 | 1.000000 |
| rad60anti      | 8.26560e-12 | 1.000000 | 8.26560e-12 | 1.000000 |
| PAH3+H         | 6.72155e-12 | 1.000000 | 6.72155e-12 | 1.000000 |
| rad46          | 6.42601e-12 | 1.000000 | 6.42601e-12 | 1.000000 |
| PAH10+CH3      | 5.52880e-12 | 1.000000 | 5.52880e-12 | 1.000000 |
| rad59          | 1.39467e-12 | 1.000000 | 1.39467e-12 | 1.000000 |
| PhcycC3H3_A+H  | 4.13677e-13 | 1.000000 | 4.13677e-13 | 1.000000 |
| rad43          | 2.58810e-13 | 1.000000 | 2.58810e-13 | 1.000000 |
| rad54          | 2.05786e-13 | 1.000000 | 2.05786e-13 | 1.000000 |
| rad62          | 5.54306e-14 | 1.000000 | 5.54306e-14 | 1.000000 |
| rad50          | 4.23315e-14 | 1.000000 | 4.23315e-14 | 1.000000 |
| rad70          | 3.14362e-15 | 1.000000 | 3.14362e-15 | 1.000000 |
| rad55          | 1.37813e-15 | 1.000000 | 1.37813e-15 | 1.000000 |
| PAH1+H         | 5.58594e-16 | 1.000000 | 5.58594e-16 | 1.000000 |
| rad52          | 2.67814e-16 | 1.000000 | 2.67814e-16 | 1.000000 |
| rad58          | 7.50234e-17 | 1.000000 | 7.50234e-17 | 1.000000 |
| rad51          | 6.49691e-17 | 1.000000 | 6.49691e-17 | 1.000000 |
| rad34          | 2.91050e-17 | 1.000000 | 2.91050e-17 | 1.000000 |
| Phenyl+cycC3H4 | 2.77347e-17 | 1.000000 | 0.000000    | 1.000000 |

|                               |             |         |             |         |
|-------------------------------|-------------|---------|-------------|---------|
| rad42                         | 3.04830e-18 | 1.00000 | 3.04830e-18 | 1.00000 |
| rad41                         | 2.76406e-18 | 1.00000 | 2.76406e-18 | 1.00000 |
| rad65                         | 1.27714e-18 | 1.00000 | 1.27714e-18 | 1.00000 |
| PhcycC3H3_B+H                 | 2.48349e-32 | 1.00000 | 2.48349e-32 | 1.00000 |
| rad53                         | 1.11865e-33 | 1.00000 | 1.11865e-33 | 1.00000 |
| rad26                         | 7.76043e-34 | 1.00000 | 7.76043e-34 | 1.00000 |
| rad47                         | 5.36316e-34 | 1.00000 | 5.36316e-34 | 1.00000 |
| rad28                         | 2.05711e-34 | 1.00000 | 2.05711e-34 | 1.00000 |
| rad6                          | 1.16672e-34 | 1.00000 | 1.16672e-34 | 1.00000 |
| rad64                         | 4.89180e-36 | 1.00000 | 4.89180e-36 | 1.00000 |
| rad2                          | 7.77272e-37 | 1.00000 | 7.77272e-37 | 1.00000 |
| rad14                         | 2.26764e-37 | 1.00000 | 2.26764e-37 | 1.00000 |
| rad25                         | 1.04412e-37 | 1.00000 | 1.04412e-37 | 1.00000 |
| rad10                         | 4.94101e-38 | 1.00000 | 4.94101e-38 | 1.00000 |
| rad1                          | 4.90977e-38 | 1.00000 | 4.90977e-38 | 1.00000 |
| rad27                         | 2.12284e-38 | 1.00000 | 2.12284e-38 | 1.00000 |
| rad19anti                     | 1.76071e-38 | 1.00000 | 1.76071e-38 | 1.00000 |
| rad3                          | 9.55691e-39 | 1.00000 | 9.55691e-39 | 1.00000 |
| rad7                          | 8.42205e-39 | 1.00000 | 8.42205e-39 | 1.00000 |
| rad4                          | 4.82695e-39 | 1.00000 | 4.82695e-39 | 1.00000 |
| rad11                         | 2.37293e-39 | 1.00000 | 2.37293e-39 | 1.00000 |
| rad9                          | 1.27148e-40 | 1.00000 | 1.27148e-40 | 1.00000 |
| rad13                         | 4.65469e-41 | 1.00000 | 4.65469e-41 | 1.00000 |
| rad5                          | 4.48988e-41 | 1.00000 | 4.48988e-41 | 1.00000 |
| rad31                         | 1.07178e-42 | 1.00000 | 1.07178e-42 | 1.00000 |
| rad33                         | 8.99953e-43 | 1.00000 | 8.99953e-43 | 1.00000 |
| rad61                         | 5.02958e-43 | 1.00000 | 5.02958e-43 | 1.00000 |
| rad15                         | 5.61453e-44 | 1.00000 | 5.61453e-44 | 1.00000 |
| rad20                         | 5.64832e-45 | 1.00000 | 5.64832e-45 | 1.00000 |
| rad21                         | 4.46946e-45 | 1.00000 | 4.46946e-45 | 1.00000 |
| rad56                         | 3.36943e-45 | 1.00000 | 3.36943e-45 | 1.00000 |
| Benzene+cycloprop-2-enylidene | 3.08591e-46 | 1.00000 | 3.08591e-46 | 1.00000 |
| rad18                         | 7.19979e-47 | 1.00000 | 7.19979e-47 | 1.00000 |
| rad12                         | 3.91743e-47 | 1.00000 | 3.91743e-47 | 1.00000 |
| rad68syn                      | 2.54023e-47 | 1.00000 | 2.54023e-47 | 1.00000 |
| rad68anti                     | 2.17398e-47 | 1.00000 | 2.17398e-47 | 1.00000 |
| rad19syn                      | 1.37416e-48 | 1.00000 | 1.37416e-48 | 1.00000 |
| rad22                         | 3.66397e-49 | 1.00000 | 3.66397e-49 | 1.00000 |
| rad23                         | 2.25042e-49 | 1.00000 | 2.25042e-49 | 1.00000 |
| rad24                         | 7.35772e-51 | 1.00000 | 7.35772e-51 | 1.00000 |
| rad45                         | 1.73344e-51 | 1.00000 | 1.73344e-51 | 1.00000 |
| rad36                         | 1.06316e-52 | 1.00000 | 1.06316e-52 | 1.00000 |
| rad73                         | 2.07001e-55 | 1.00000 | 2.07001e-55 | 1.00000 |
| rad40syn                      | 2.93458e-56 | 1.00000 | 2.93458e-56 | 1.00000 |
| rad40anti                     | 2.41836e-56 | 1.00000 | 2.41836e-56 | 1.00000 |
| PAH8+H                        | 1.12087e-60 | 1.00000 | 1.12087e-60 | 1.00000 |
| rad71                         | 3.49397e-64 | 1.00000 | 3.49397e-64 | 1.00000 |
| rad8                          | 2.40363e-68 | 1.00000 | 2.40363e-68 | 1.00000 |
| Benzene+cycloprop-1-enylidene | 5.02895e-84 | 1.00000 | 5.02895e-84 | 1.00000 |

0.100000000E-08 Pa, 30.0000000 K

=====

| Rate constant             | True (fraction)        | Effective (fraction)   |
|---------------------------|------------------------|------------------------|
| Total                     | 8.13009e-20 (1.00 )    | 8.13009e-20 (1.00 )    |
| Formation of rad19        | 8.13009e-20 (1.00 )    | 8.13009e-20 (1.00 )    |
| H-abstraction to cyc2enyl | 1.08880e-49 (1.34e-30) | 1.08880e-49 (1.34e-30) |
| H-abstraction to cyclenyl | 7.55172e-75 (9.29e-56) | 7.55172e-75 (9.29e-56) |

| species    | PYtrue      | Cumul    | PYeffective | Cumul    |
|------------|-------------|----------|-------------|----------|
| Indene+H   | 0.999770    | 0.999770 | 0.999770    | 0.999770 |
| PhCHCCH2+H | 0.000218740 | 0.999989 | 0.000218740 | 0.999989 |
| PhCCH+CH3  | 3.77922e-06 | 0.999993 | 3.77922e-06 | 0.999993 |
| C2H2+PhCH2 | 2.68544e-06 | 0.999995 | 2.68544e-06 | 0.999995 |
| PhCCCH3+H  | 2.12543e-06 | 0.999997 | 2.12543e-06 | 0.999997 |
| Ph+MeAc    | 1.57151e-06 | 0.999999 | 1.57151e-06 | 0.999999 |
| rad67      | 4.76660e-07 | 0.999999 | 4.76660e-07 | 0.999999 |
| rad35      | 2.11031e-07 | 1.000000 | 2.11031e-07 | 1.000000 |
| Ph+Allene  | 1.36499e-07 | 1.000000 | 1.36499e-07 | 1.000000 |
| PAH7+H     | 1.80489e-08 | 1.000000 | 1.80489e-08 | 1.000000 |
| PhCH2CCH+H | 1.66215e-08 | 1.000000 | 1.66215e-08 | 1.000000 |
| rad39      | 5.09007e-09 | 1.000000 | 5.09007e-09 | 1.000000 |
| rad37      | 4.68501e-09 | 1.000000 | 4.68501e-09 | 1.000000 |
| rad30      | 3.94539e-09 | 1.000000 | 3.94539e-09 | 1.000000 |
| PAH9+H     | 2.57108e-10 | 1.000000 | 2.57108e-10 | 1.000000 |
| rad38      | 1.08385e-10 | 1.000000 | 1.08385e-10 | 1.000000 |
| rad60syn   | 1.71588e-11 | 1.000000 | 1.71588e-11 | 1.000000 |
| rad60anti  | 8.37914e-12 | 1.000000 | 8.37914e-12 | 1.000000 |
| PAH3+H     | 6.84326e-12 | 1.000000 | 6.84326e-12 | 1.000000 |

|                               |             |          |             |          |
|-------------------------------|-------------|----------|-------------|----------|
| rad46                         | 6.51964e-12 | 1.000000 | 6.51964e-12 | 1.000000 |
| PAH10+CH3                     | 5.67120e-12 | 1.000000 | 5.67120e-12 | 1.000000 |
| rad59                         | 1.41896e-12 | 1.000000 | 1.41896e-12 | 1.000000 |
| PhcycC3H3_A+H                 | 4.42422e-13 | 1.000000 | 4.42422e-13 | 1.000000 |
| rad43                         | 2.64743e-13 | 1.000000 | 2.64743e-13 | 1.000000 |
| rad54                         | 2.11004e-13 | 1.000000 | 2.11004e-13 | 1.000000 |
| rad62                         | 5.67504e-14 | 1.000000 | 5.67504e-14 | 1.000000 |
| rad50                         | 4.32261e-14 | 1.000000 | 4.32261e-14 | 1.000000 |
| rad70                         | 3.24823e-15 | 1.000000 | 3.24823e-15 | 1.000000 |
| rad55                         | 1.42504e-15 | 1.000000 | 1.42504e-15 | 1.000000 |
| PAH1+H                        | 5.84855e-16 | 1.000000 | 5.84855e-16 | 1.000000 |
| rad52                         | 2.74820e-16 | 1.000000 | 2.74820e-16 | 1.000000 |
| rad58                         | 7.77933e-17 | 1.000000 | 7.77933e-17 | 1.000000 |
| rad51                         | 6.70684e-17 | 1.000000 | 6.70684e-17 | 1.000000 |
| Phenyl+cycC3H4                | 5.25631e-17 | 1.000000 | 0.00000     | 1.000000 |
| rad34                         | 3.05744e-17 | 1.000000 | 3.05744e-17 | 1.000000 |
| rad42                         | 3.20852e-18 | 1.000000 | 3.20852e-18 | 1.000000 |
| rad41                         | 2.96189e-18 | 1.000000 | 2.96189e-18 | 1.000000 |
| rad65                         | 1.32250e-18 | 1.000000 | 1.32250e-18 | 1.000000 |
| PhcycC3H3_B+H                 | 4.16221e-29 | 1.000000 | 4.16221e-29 | 1.000000 |
| Benzene+cycloprop-2-enylidene | 1.33923e-30 | 1.000000 | 1.33923e-30 | 1.000000 |
| rad53                         | 2.08877e-33 | 1.000000 | 2.08877e-33 | 1.000000 |
| rad26                         | 3.76479e-34 | 1.000000 | 3.76479e-34 | 1.000000 |
| rad47                         | 2.66202e-34 | 1.000000 | 2.66202e-34 | 1.000000 |
| rad28                         | 9.77040e-35 | 1.000000 | 9.77040e-35 | 1.000000 |
| rad6                          | 3.46317e-35 | 1.000000 | 3.46317e-35 | 1.000000 |
| rad64                         | 3.66428e-36 | 1.000000 | 3.66428e-36 | 1.000000 |
| rad2                          | 3.62282e-37 | 1.000000 | 3.62282e-37 | 1.000000 |
| rad14                         | 1.11594e-37 | 1.000000 | 1.11594e-37 | 1.000000 |
| rad25                         | 5.15811e-38 | 1.000000 | 5.15811e-38 | 1.000000 |
| rad10                         | 2.51293e-38 | 1.000000 | 2.51293e-38 | 1.000000 |
| rad1                          | 2.28963e-38 | 1.000000 | 2.28963e-38 | 1.000000 |
| rad27                         | 1.04934e-38 | 1.000000 | 1.04934e-38 | 1.000000 |
| rad19anti                     | 9.43582e-39 | 1.000000 | 9.43582e-39 | 1.000000 |
| rad3                          | 4.39232e-39 | 1.000000 | 4.39232e-39 | 1.000000 |
| rad7                          | 2.50173e-39 | 1.000000 | 2.50173e-39 | 1.000000 |
| rad4                          | 2.21863e-39 | 1.000000 | 2.21863e-39 | 1.000000 |
| rad11                         | 7.66789e-40 | 1.000000 | 7.66789e-40 | 1.000000 |
| rad9                          | 6.18182e-41 | 1.000000 | 6.18182e-41 | 1.000000 |
| rad5                          | 2.03053e-41 | 1.000000 | 2.03053e-41 | 1.000000 |
| rad13                         | 1.38359e-41 | 1.000000 | 1.38359e-41 | 1.000000 |
| rad31                         | 5.64751e-43 | 1.000000 | 5.64751e-43 | 1.000000 |
| rad33                         | 4.33388e-43 | 1.000000 | 4.33388e-43 | 1.000000 |
| rad61                         | 3.99438e-43 | 1.000000 | 3.99438e-43 | 1.000000 |
| rad15                         | 2.73168e-44 | 1.000000 | 2.73168e-44 | 1.000000 |
| rad20                         | 2.84963e-45 | 1.000000 | 2.84963e-45 | 1.000000 |
| rad56                         | 2.62090e-45 | 1.000000 | 2.62090e-45 | 1.000000 |
| rad21                         | 2.25743e-45 | 1.000000 | 2.25743e-45 | 1.000000 |
| rad18                         | 3.58930e-47 | 1.000000 | 3.58930e-47 | 1.000000 |
| rad12                         | 2.03275e-47 | 1.000000 | 2.03275e-47 | 1.000000 |
| rad68syn                      | 1.99221e-47 | 1.000000 | 1.99221e-47 | 1.000000 |
| rad68anti                     | 1.70453e-47 | 1.000000 | 1.70453e-47 | 1.000000 |
| rad19syn                      | 8.38610e-49 | 1.000000 | 8.38610e-49 | 1.000000 |
| rad22                         | 1.81215e-49 | 1.000000 | 1.81215e-49 | 1.000000 |
| rad23                         | 1.04448e-49 | 1.000000 | 1.04448e-49 | 1.000000 |
| rad24                         | 3.78955e-51 | 1.000000 | 3.78955e-51 | 1.000000 |
| rad45                         | 6.35029e-52 | 1.000000 | 6.35029e-52 | 1.000000 |
| rad36                         | 3.89418e-53 | 1.000000 | 3.89418e-53 | 1.000000 |
| rad73                         | 1.66954e-55 | 1.000000 | 1.66954e-55 | 1.000000 |
| Benzene+cycloprop-1-enylidene | 9.28861e-56 | 1.000000 | 9.28861e-56 | 1.000000 |
| rad40syn                      | 2.57248e-56 | 1.000000 | 2.57248e-56 | 1.000000 |
| rad40anti                     | 2.11969e-56 | 1.000000 | 2.11969e-56 | 1.000000 |
| PAH8+H                        | 1.00608e-60 | 1.000000 | 1.00608e-60 | 1.000000 |
| rad71                         | 2.96429e-64 | 1.000000 | 2.96429e-64 | 1.000000 |
| rad8                          | 1.26714e-68 | 1.000000 | 1.26714e-68 | 1.000000 |

0.100000000E-08 Pa, 40.000000 K

| Rate constant             | True (fraction)        | Effective (fraction)   |             |          |
|---------------------------|------------------------|------------------------|-------------|----------|
| Total                     | 2.24819e-18 (1.00 )    | 2.24819e-18 (1.00 )    |             |          |
| Formation of rad19        | 2.24819e-18 (1.00 )    | 2.24819e-18 (1.00 )    |             |          |
| H-abstraction to cyc2enyl | 1.72361e-40 (7.67e-23) | 1.72361e-40 (7.67e-23) |             |          |
| H-abstraction to cyclenyl | 2.48792e-59 (1.11e-41) | 2.48792e-59 (1.11e-41) |             |          |
| species                   | PYtrue                 | Cumul                  | PYeffective | Cumul    |
| Indene+H                  | 0.999767               | 0.999767               | 0.999767    | 0.999767 |
| PhCHCCH2+H                | 0.000221748            | 0.999989               | 0.000221748 | 0.999989 |
| PhCCH+CH3                 | 3.83605e-06            | 0.999993               | 3.83605e-06 | 0.999993 |

|                               |             |          |             |          |
|-------------------------------|-------------|----------|-------------|----------|
| C2H2+PhCH2                    | 2.73340e-06 | 0.999995 | 2.73340e-06 | 0.999995 |
| PhCCCH3+H                     | 2.16038e-06 | 0.999997 | 2.16038e-06 | 0.999997 |
| Ph+MeAc                       | 1.60299e-06 | 0.999999 | 1.60299e-06 | 0.999999 |
| rad67                         | 4.85698e-07 | 1.000000 | 4.85698e-07 | 1.000000 |
| rad35                         | 2.14867e-07 | 1.000000 | 2.14867e-07 | 1.000000 |
| Ph+Allene                     | 1.40139e-07 | 1.000000 | 1.40139e-07 | 1.000000 |
| PAH7+H                        | 1.84621e-08 | 1.000000 | 1.84621e-08 | 1.000000 |
| PhCH2CCH+H                    | 1.71356e-08 | 1.000000 | 1.71356e-08 | 1.000000 |
| rad39                         | 5.20698e-09 | 1.000000 | 5.20698e-09 | 1.000000 |
| rad37                         | 4.79888e-09 | 1.000000 | 4.79888e-09 | 1.000000 |
| rad30                         | 4.01853e-09 | 1.000000 | 4.01853e-09 | 1.000000 |
| PAH9+H                        | 2.63258e-10 | 1.000000 | 2.63258e-10 | 1.000000 |
| rad38                         | 1.11216e-10 | 1.000000 | 1.11216e-10 | 1.000000 |
| rad60syn                      | 1.76027e-11 | 1.000000 | 1.76027e-11 | 1.000000 |
| rad60anti                     | 8.60137e-12 | 1.000000 | 8.60137e-12 | 1.000000 |
| PAH3+H                        | 7.08284e-12 | 1.000000 | 7.08284e-12 | 1.000000 |
| rad46                         | 6.70313e-12 | 1.000000 | 6.70313e-12 | 1.000000 |
| PAH10+CH3                     | 5.95405e-12 | 1.000000 | 5.95405e-12 | 1.000000 |
| rad59                         | 1.46672e-12 | 1.000000 | 1.46672e-12 | 1.000000 |
| PhcycC3H3_A+H                 | 5.01394e-13 | 1.000000 | 5.01394e-13 | 1.000000 |
| rad43                         | 2.76481e-13 | 1.000000 | 2.76481e-13 | 1.000000 |
| rad54                         | 2.21365e-13 | 1.000000 | 2.21365e-13 | 1.000000 |
| rad62                         | 5.93637e-14 | 1.000000 | 5.93637e-14 | 1.000000 |
| rad50                         | 4.49944e-14 | 1.000000 | 4.49944e-14 | 1.000000 |
| rad70                         | 3.45813e-15 | 1.000000 | 3.45813e-15 | 1.000000 |
| rad55                         | 1.51897e-15 | 1.000000 | 1.51897e-15 | 1.000000 |
| PAH1+H                        | 6.38443e-16 | 1.000000 | 6.38443e-16 | 1.000000 |
| rad52                         | 2.88755e-16 | 1.000000 | 2.88755e-16 | 1.000000 |
| Phenyl+cycC3H4                | 1.15738e-16 | 1.000000 | 0.000000    | 1.000000 |
| rad58                         | 8.33664e-17 | 1.000000 | 8.33664e-17 | 1.000000 |
| rad51                         | 7.12775e-17 | 1.000000 | 7.12775e-17 | 1.000000 |
| rad34                         | 3.35233e-17 | 1.000000 | 3.35233e-17 | 1.000000 |
| rad42                         | 3.55448e-18 | 1.000000 | 3.55448e-18 | 1.000000 |
| rad41                         | 3.38724e-18 | 1.000000 | 3.38724e-18 | 1.000000 |
| rad65                         | 1.41378e-18 | 1.000000 | 1.41378e-18 | 1.000000 |
| Benzene+cycloprop-2-enylidene | 7.66665e-23 | 1.000000 | 7.66665e-23 | 1.000000 |
| PhcycC3H3_B+H                 | 8.31291e-25 | 1.000000 | 8.31291e-25 | 1.000000 |
| rad53                         | 2.40692e-29 | 1.000000 | 2.40692e-29 | 1.000000 |
| rad64                         | 2.71954e-33 | 1.000000 | 2.71954e-33 | 1.000000 |
| rad26                         | 2.45428e-34 | 1.000000 | 2.45428e-34 | 1.000000 |
| rad47                         | 1.79767e-34 | 1.000000 | 1.79767e-34 | 1.000000 |
| rad28                         | 6.31433e-35 | 1.000000 | 6.31433e-35 | 1.000000 |
| rad6                          | 1.78230e-35 | 1.000000 | 1.78230e-35 | 1.000000 |
| rad2                          | 3.49747e-37 | 1.000000 | 3.49747e-37 | 1.000000 |
| rad14                         | 7.43180e-38 | 1.000000 | 7.43180e-38 | 1.000000 |
| rad25                         | 3.46192e-38 | 1.000000 | 3.46192e-38 | 1.000000 |
| rad1                          | 2.21290e-38 | 1.000000 | 2.21290e-38 | 1.000000 |
| rad10                         | 1.76327e-38 | 1.000000 | 1.76327e-38 | 1.000000 |
| rad19anti                     | 7.57595e-39 | 1.000000 | 7.57595e-39 | 1.000000 |
| rad27                         | 7.05358e-39 | 1.000000 | 7.05358e-39 | 1.000000 |
| rad3                          | 4.83254e-39 | 1.000000 | 4.83254e-39 | 1.000000 |
| rad4                          | 2.44162e-39 | 1.000000 | 2.44162e-39 | 1.000000 |
| rad7                          | 1.28875e-39 | 1.000000 | 1.28875e-39 | 1.000000 |
| rad11                         | 4.19802e-40 | 1.000000 | 4.19802e-40 | 1.000000 |
| rad9                          | 4.39066e-41 | 1.000000 | 4.39066e-41 | 1.000000 |
| rad5                          | 1.30075e-41 | 1.000000 | 1.30075e-41 | 1.000000 |
| Benzene+cycloprop-1-enylidene | 1.10663e-41 | 1.000000 | 1.10663e-41 | 1.000000 |
| rad13                         | 7.13313e-42 | 1.000000 | 7.13313e-42 | 1.000000 |
| rad61                         | 6.80052e-43 | 1.000000 | 6.80052e-43 | 1.000000 |
| rad31                         | 4.36404e-43 | 1.000000 | 4.36404e-43 | 1.000000 |
| rad33                         | 2.95578e-43 | 1.000000 | 2.95578e-43 | 1.000000 |
| rad15                         | 1.93945e-44 | 1.000000 | 1.93945e-44 | 1.000000 |
| rad56                         | 4.28735e-45 | 1.000000 | 4.28735e-45 | 1.000000 |
| rad20                         | 1.99960e-45 | 1.000000 | 1.99960e-45 | 1.000000 |
| rad21                         | 1.58779e-45 | 1.000000 | 1.58779e-45 | 1.000000 |
| rad68syn                      | 3.31655e-47 | 1.000000 | 3.31655e-47 | 1.000000 |
| rad68anti                     | 2.83606e-47 | 1.000000 | 2.83606e-47 | 1.000000 |
| rad18                         | 2.45614e-47 | 1.000000 | 2.45614e-47 | 1.000000 |
| rad12                         | 1.51709e-47 | 1.000000 | 1.51709e-47 | 1.000000 |
| rad19syn                      | 8.61360e-49 | 1.000000 | 8.61360e-49 | 1.000000 |
| rad22                         | 1.22146e-49 | 1.000000 | 1.22146e-49 | 1.000000 |
| rad23                         | 7.16218e-50 | 1.000000 | 7.16218e-50 | 1.000000 |
| rad24                         | 2.77721e-51 | 1.000000 | 2.77721e-51 | 1.000000 |
| rad45                         | 6.16376e-52 | 1.000000 | 6.16376e-52 | 1.000000 |
| rad36                         | 3.77876e-53 | 1.000000 | 3.77876e-53 | 1.000000 |
| rad73                         | 2.95408e-55 | 1.000000 | 2.95408e-55 | 1.000000 |
| rad40syn                      | 5.41703e-56 | 1.000000 | 5.41703e-56 | 1.000000 |
| rad40anti                     | 4.46179e-56 | 1.000000 | 4.46179e-56 | 1.000000 |
| PAH8+H                        | 2.23567e-60 | 1.000000 | 2.23567e-60 | 1.000000 |
| rad71                         | 5.87042e-64 | 1.000000 | 5.87042e-64 | 1.000000 |

rad8 | 9.75566e-69 1.000000 | 9.75566e-69 1.000000

0.100000000E-08 Pa, 50.0000000 K

=====  
Rate constant | True (fraction) | Effective (fraction)  
-----  
Total | 1.72707e-17 (1.00 ) | 1.72707e-17 (1.00 )  
Formation of rad19 | 1.72707e-17 (1.00 ) | 1.72707e-17 (1.00 )  
H-abstraction to cyc2enyl | 5.49905e-35 (3.18e-18) | 5.49905e-35 (3.18e-18)  
H-abstraction to cyclenyl | 4.93090e-50 (2.86e-33) | 4.93090e-50 (2.86e-33)

| species                       | PYtrue      | Cumul    | PYeffective | Cumul    |
|-------------------------------|-------------|----------|-------------|----------|
| Indene+H                      | 0.999763    | 0.999763 | 0.999763    | 0.999763 |
| PhCHCCH2+H                    | 0.000225658 | 0.999989 | 0.000225658 | 0.999989 |
| PhCCH+CH3                     | 3.90994e-06 | 0.999993 | 3.90994e-06 | 0.999993 |
| C2H2+PhCH2                    | 2.79605e-06 | 0.999995 | 2.79605e-06 | 0.999995 |
| PhCCCH3+H                     | 2.20592e-06 | 0.999998 | 2.20592e-06 | 0.999998 |
| Ph+MeAc                       | 1.64418e-06 | 0.999999 | 1.64418e-06 | 0.999999 |
| rad67                         | 4.97514e-07 | 1.000000 | 4.97514e-07 | 1.000000 |
| rad35                         | 2.19879e-07 | 1.000000 | 2.19879e-07 | 1.000000 |
| Ph+Allene                     | 1.44942e-07 | 1.000000 | 1.44942e-07 | 1.000000 |
| PAH7+H                        | 1.90048e-08 | 1.000000 | 1.90048e-08 | 1.000000 |
| PhCH2CCH+H                    | 1.78174e-08 | 1.000000 | 1.78174e-08 | 1.000000 |
| rad39                         | 5.36057e-09 | 1.000000 | 5.36057e-09 | 1.000000 |
| rad37                         | 4.94868e-09 | 1.000000 | 4.94868e-09 | 1.000000 |
| rad30                         | 4.11419e-09 | 1.000000 | 4.11419e-09 | 1.000000 |
| PAH9+H                        | 2.71352e-10 | 1.000000 | 2.71352e-10 | 1.000000 |
| rad38                         | 1.14954e-10 | 1.000000 | 1.14954e-10 | 1.000000 |
| rad60syn                      | 1.81880e-11 | 1.000000 | 1.81880e-11 | 1.000000 |
| rad60anti                     | 8.89466e-12 | 1.000000 | 8.89466e-12 | 1.000000 |
| PAH3+H                        | 7.40206e-12 | 1.000000 | 7.40206e-12 | 1.000000 |
| rad46                         | 6.94584e-12 | 1.000000 | 6.94584e-12 | 1.000000 |
| PAH10+CH3                     | 6.33665e-12 | 1.000000 | 6.33665e-12 | 1.000000 |
| rad59                         | 1.53025e-12 | 1.000000 | 1.53025e-12 | 1.000000 |
| PhcycC3H3_A+H                 | 5.85937e-13 | 1.000000 | 5.85937e-13 | 1.000000 |
| rad43                         | 2.92252e-13 | 1.000000 | 2.92252e-13 | 1.000000 |
| rad54                         | 2.35374e-13 | 1.000000 | 2.35374e-13 | 1.000000 |
| rad62                         | 6.28791e-14 | 1.000000 | 6.28791e-14 | 1.000000 |
| rad50                         | 4.73675e-14 | 1.000000 | 4.73675e-14 | 1.000000 |
| rad70                         | 3.74676e-15 | 1.000000 | 3.74676e-15 | 1.000000 |
| rad55                         | 1.64775e-15 | 1.000000 | 1.64775e-15 | 1.000000 |
| PAH1+H                        | 7.14028e-16 | 1.000000 | 7.14028e-16 | 1.000000 |
| rad52                         | 3.07655e-16 | 1.000000 | 3.07655e-16 | 1.000000 |
| Phenyl+cycC3H4                | 2.36668e-16 | 1.000000 | 0.000000    | 1.000000 |
| rad58                         | 9.10706e-17 | 1.000000 | 9.10706e-17 | 1.000000 |
| rad51                         | 7.70607e-17 | 1.000000 | 7.70607e-17 | 1.000000 |
| rad34                         | 3.76207e-17 | 1.000000 | 3.76207e-17 | 1.000000 |
| rad42                         | 4.07396e-18 | 1.000000 | 4.07396e-18 | 1.000000 |
| rad41                         | 4.02391e-18 | 1.000000 | 4.02391e-18 | 1.000000 |
| Benzene+cycloprop-2-enylidene | 3.18404e-18 | 1.000000 | 3.18404e-18 | 1.000000 |
| rad65                         | 1.53995e-18 | 1.000000 | 1.53995e-18 | 1.000000 |
| PhcycC3H3_B+H                 | 2.98283e-22 | 1.000000 | 2.98283e-22 | 1.000000 |
| rad53                         | 8.13833e-27 | 1.000000 | 8.13833e-27 | 1.000000 |
| rad64                         | 5.78544e-30 | 1.000000 | 5.78544e-30 | 1.000000 |
| Benzene+cycloprop-1-enylidene | 2.85507e-33 | 1.000000 | 2.85507e-33 | 1.000000 |
| rad26                         | 1.79891e-34 | 1.000000 | 1.79891e-34 | 1.000000 |
| rad47                         | 1.37437e-34 | 1.000000 | 1.37437e-34 | 1.000000 |
| rad28                         | 4.59936e-35 | 1.000000 | 4.59936e-35 | 1.000000 |
| rad6                          | 1.13042e-35 | 1.000000 | 1.13042e-35 | 1.000000 |
| rad2                          | 4.19507e-37 | 1.000000 | 4.19507e-37 | 1.000000 |
| rad14                         | 5.60666e-38 | 1.000000 | 5.60666e-38 | 1.000000 |
| rad1                          | 2.65850e-38 | 1.000000 | 2.65850e-38 | 1.000000 |
| rad25                         | 2.63915e-38 | 1.000000 | 2.63915e-38 | 1.000000 |
| rad10                         | 1.68776e-38 | 1.000000 | 1.68776e-38 | 1.000000 |
| rad19anti                     | 7.56647e-39 | 1.000000 | 7.56647e-39 | 1.000000 |
| rad3                          | 6.48201e-39 | 1.000000 | 6.48201e-39 | 1.000000 |
| rad27                         | 5.39155e-39 | 1.000000 | 5.39155e-39 | 1.000000 |
| rad4                          | 3.27610e-39 | 1.000000 | 3.27610e-39 | 1.000000 |
| rad7                          | 8.18361e-40 | 1.000000 | 8.18361e-40 | 1.000000 |
| rad11                         | 2.80628e-40 | 1.000000 | 2.80628e-40 | 1.000000 |
| rad9                          | 3.69321e-41 | 1.000000 | 3.69321e-41 | 1.000000 |
| rad5                          | 9.55590e-42 | 1.000000 | 9.55590e-42 | 1.000000 |
| rad13                         | 4.53398e-42 | 1.000000 | 4.53398e-42 | 1.000000 |
| rad61                         | 1.95110e-42 | 1.000000 | 1.95110e-42 | 1.000000 |
| rad31                         | 4.10753e-43 | 1.000000 | 4.10753e-43 | 1.000000 |
| rad33                         | 2.33575e-43 | 1.000000 | 2.33575e-43 | 1.000000 |
| rad15                         | 1.63007e-44 | 1.000000 | 1.63007e-44 | 1.000000 |
| rad56                         | 1.18498e-44 | 1.000000 | 1.18498e-44 | 1.000000 |
| rad20                         | 1.62458e-45 | 1.000000 | 1.62458e-45 | 1.000000 |



|           |             |         |             |         |
|-----------|-------------|---------|-------------|---------|
| rad21     | 1.29435e-45 | 1.00000 | 1.29435e-45 | 1.00000 |
| rad68syn  | 9.39640e-47 | 1.00000 | 9.39640e-47 | 1.00000 |
| rad68anti | 8.02867e-47 | 1.00000 | 8.02867e-47 | 1.00000 |
| rad18     | 1.92530e-47 | 1.00000 | 1.92530e-47 | 1.00000 |
| rad12     | 1.34867e-47 | 1.00000 | 1.34867e-47 | 1.00000 |
| rad19syn  | 1.15714e-48 | 1.00000 | 1.15714e-48 | 1.00000 |
| rad22     | 9.37175e-50 | 1.00000 | 9.37175e-50 | 1.00000 |
| rad23     | 5.85829e-50 | 1.00000 | 5.85829e-50 | 1.00000 |
| rad24     | 2.40028e-51 | 1.00000 | 2.40028e-51 | 1.00000 |
| rad45     | 7.34302e-52 | 1.00000 | 7.34302e-52 | 1.00000 |
| rad36     | 4.49954e-53 | 1.00000 | 4.49954e-53 | 1.00000 |
| rad73     | 9.15254e-55 | 1.00000 | 9.15254e-55 | 1.00000 |
| rad40syn  | 2.11570e-55 | 1.00000 | 2.11570e-55 | 1.00000 |
| rad40anti | 1.74111e-55 | 1.00000 | 1.74111e-55 | 1.00000 |
| PAH8+H    | 9.50859e-60 | 1.00000 | 9.50859e-60 | 1.00000 |
| rad71     | 2.15899e-63 | 1.00000 | 2.15899e-63 | 1.00000 |
| rad8      | 9.04687e-69 | 1.00000 | 9.04687e-69 | 1.00000 |

0.100000000E-08 Pa, 60.0000000 K

| Rate constant             | True (fraction)        | Effective (fraction)   |  |  |
|---------------------------|------------------------|------------------------|--|--|
| Total                     | 6.93738e-17 (1.00 )    | 6.93738e-17 (1.00 )    |  |  |
| Formation of rad19        | 6.93738e-17 (1.000 )   | 6.93738e-17 (1.000 )   |  |  |
| H-abstraction to cyc2enyl | 2.50609e-31 (3.61e-15) | 2.50609e-31 (3.61e-15) |  |  |
| H-abstraction to cyclenyl | 7.62015e-44 (1.10e-27) | 7.62015e-44 (1.10e-27) |  |  |

  

| species                       | PYtrue      | Cumul    | PYeffective | Cumul    |
|-------------------------------|-------------|----------|-------------|----------|
| Indene+H                      | 0.999758    | 0.999758 | 0.999758    | 0.999758 |
| PhCHCCH2+H                    | 0.000230121 | 0.999988 | 0.000230121 | 0.999988 |
| PhCCH+CH3                     | 3.99427e-06 | 0.999992 | 3.99427e-06 | 0.999992 |
| C2H2+PhCH2                    | 2.86797e-06 | 0.999995 | 2.86797e-06 | 0.999995 |
| PhCCCH3+H                     | 2.25806e-06 | 0.999997 | 2.25806e-06 | 0.999997 |
| Ph+MeAc                       | 1.69157e-06 | 0.999999 | 1.69157e-06 | 0.999999 |
| rad67                         | 5.11098e-07 | 0.999999 | 5.11098e-07 | 0.999999 |
| rad35                         | 2.25634e-07 | 1.000000 | 2.25634e-07 | 1.000000 |
| Ph+Allene                     | 1.50530e-07 | 1.000000 | 1.50530e-07 | 1.000000 |
| PAH7+H                        | 1.96327e-08 | 1.000000 | 1.96327e-08 | 1.000000 |
| PhCH2CCH+H                    | 1.86153e-08 | 1.000000 | 1.86153e-08 | 1.000000 |
| rad39                         | 5.53820e-09 | 1.000000 | 5.53820e-09 | 1.000000 |
| rad37                         | 5.12226e-09 | 1.000000 | 5.12226e-09 | 1.000000 |
| rad30                         | 4.22418e-09 | 1.000000 | 4.22418e-09 | 1.000000 |
| PAH9+H                        | 2.80739e-10 | 1.000000 | 2.80739e-10 | 1.000000 |
| rad38                         | 1.19306e-10 | 1.000000 | 1.19306e-10 | 1.000000 |
| rad60syn                      | 1.88685e-11 | 1.000000 | 1.88685e-11 | 1.000000 |
| rad60anti                     | 9.23591e-12 | 1.000000 | 9.23591e-12 | 1.000000 |
| PAH3+H                        | 7.77808e-12 | 1.000000 | 7.77808e-12 | 1.000000 |
| rad46                         | 7.22908e-12 | 1.000000 | 7.22908e-12 | 1.000000 |
| PAH10+CH3                     | 6.79612e-12 | 1.000000 | 6.79612e-12 | 1.000000 |
| rad59                         | 1.60493e-12 | 1.000000 | 1.60493e-12 | 1.000000 |
| PhcycC3H3_A+H                 | 6.95715e-13 | 1.000000 | 6.95715e-13 | 1.000000 |
| rad43                         | 3.11028e-13 | 1.000000 | 3.11028e-13 | 1.000000 |
| rad54                         | 2.52187e-13 | 1.000000 | 2.52187e-13 | 1.000000 |
| rad62                         | 6.70704e-14 | 1.000000 | 6.70704e-14 | 1.000000 |
| rad50                         | 5.01888e-14 | 1.000000 | 5.01888e-14 | 1.000000 |
| rad70                         | 4.10054e-15 | 1.000000 | 4.10054e-15 | 1.000000 |
| Benzene+cycloprop-2-enylidene | 3.61245e-15 | 1.000000 | 3.61245e-15 | 1.000000 |
| rad55                         | 1.80524e-15 | 1.000000 | 1.80524e-15 | 1.000000 |
| PAH1+H                        | 8.09571e-16 | 1.000000 | 8.09571e-16 | 1.000000 |
| Phenyl+cycC3H4                | 4.45921e-16 | 1.000000 | 0.000000    | 1.000000 |
| rad52                         | 3.30434e-16 | 1.000000 | 3.30434e-16 | 1.000000 |
| rad58                         | 1.00588e-16 | 1.000000 | 1.00588e-16 | 1.000000 |
| rad51                         | 8.41470e-17 | 1.000000 | 8.41470e-17 | 1.000000 |
| rad34                         | 4.27629e-17 | 1.000000 | 4.27629e-17 | 1.000000 |
| rad41                         | 4.87030e-18 | 1.000000 | 4.87030e-18 | 1.000000 |
| rad42                         | 4.76393e-18 | 1.000000 | 4.76393e-18 | 1.000000 |
| rad65                         | 1.69577e-18 | 1.000000 | 1.69577e-18 | 1.000000 |
| PhcycC3H3_B+H                 | 1.47017e-20 | 1.000000 | 1.47017e-20 | 1.000000 |
| rad53                         | 3.73122e-25 | 1.000000 | 3.73122e-25 | 1.000000 |
| Benzene+cycloprop-1-enylidene | 1.09842e-27 | 1.000000 | 1.09842e-27 | 1.000000 |
| rad64                         | 9.21628e-28 | 1.000000 | 9.21628e-28 | 1.000000 |
| rad26                         | 1.40957e-34 | 1.000000 | 1.40957e-34 | 1.000000 |
| rad47                         | 1.12620e-34 | 1.000000 | 1.12620e-34 | 1.000000 |
| rad61                         | 4.84972e-35 | 1.000000 | 4.84972e-35 | 1.000000 |
| rad28                         | 3.58360e-35 | 1.000000 | 3.58360e-35 | 1.000000 |
| rad6                          | 8.02761e-36 | 1.000000 | 8.02761e-36 | 1.000000 |
| rad2                          | 9.49673e-38 | 1.000000 | 9.49673e-38 | 1.000000 |
| rad14                         | 4.54799e-38 | 1.000000 | 4.54799e-38 | 1.000000 |
| rad25                         | 2.16688e-38 | 1.000000 | 2.16688e-38 | 1.000000 |

|           |             |          |             |          |
|-----------|-------------|----------|-------------|----------|
| rad10     | 1.23853e-38 | 1.000000 | 1.23853e-38 | 1.000000 |
| rad19anti | 8.79993e-39 | 1.000000 | 8.79993e-39 | 1.000000 |
| rad1      | 6.03090e-39 | 1.000000 | 6.03090e-39 | 1.000000 |
| rad27     | 4.44335e-39 | 1.000000 | 4.44335e-39 | 1.000000 |
| rad3      | 8.65577e-40 | 1.000000 | 8.65577e-40 | 1.000000 |
| rad7      | 5.81963e-40 | 1.000000 | 5.81963e-40 | 1.000000 |
| rad4      | 4.37651e-40 | 1.000000 | 4.37651e-40 | 1.000000 |
| rad11     | 2.09166e-40 | 1.000000 | 2.09166e-40 | 1.000000 |
| rad9      | 3.44622e-41 | 1.000000 | 3.44622e-41 | 1.000000 |
| rad5      | 7.57622e-42 | 1.000000 | 7.57622e-42 | 1.000000 |
| rad13     | 3.22796e-42 | 1.000000 | 3.22796e-42 | 1.000000 |
| rad31     | 4.41909e-43 | 1.000000 | 4.41909e-43 | 1.000000 |
| rad33     | 2.01384e-43 | 1.000000 | 2.01384e-43 | 1.000000 |
| rad56     | 6.11503e-44 | 1.000000 | 6.11503e-44 | 1.000000 |
| rad15     | 1.51961e-44 | 1.000000 | 1.51961e-44 | 1.000000 |
| rad20     | 1.44197e-45 | 1.000000 | 1.44197e-45 | 1.000000 |
| rad21     | 1.15362e-45 | 1.000000 | 1.15362e-45 | 1.000000 |
| rad68syn  | 4.98097e-46 | 1.000000 | 4.98097e-46 | 1.000000 |
| rad68anti | 4.25203e-46 | 1.000000 | 4.25203e-46 | 1.000000 |
| rad18     | 1.63554e-47 | 1.000000 | 1.63554e-47 | 1.000000 |
| rad12     | 1.33940e-47 | 1.000000 | 1.33940e-47 | 1.000000 |
| rad19syn  | 1.80508e-48 | 1.000000 | 1.80508e-48 | 1.000000 |
| rad22     | 7.75458e-50 | 1.000000 | 7.75458e-50 | 1.000000 |
| rad23     | 5.38609e-50 | 1.000000 | 5.38609e-50 | 1.000000 |
| rad24     | 2.29768e-51 | 1.000000 | 2.29768e-51 | 1.000000 |
| rad45     | 2.87510e-52 | 1.000000 | 2.87510e-52 | 1.000000 |
| rad36     | 1.76089e-53 | 1.000000 | 1.76089e-53 | 1.000000 |
| rad73     | 5.37830e-54 | 1.000000 | 5.37830e-54 | 1.000000 |
| rad40syn  | 1.54572e-54 | 1.000000 | 1.54572e-54 | 1.000000 |
| rad40anti | 1.27006e-54 | 1.000000 | 1.27006e-54 | 1.000000 |
| PAH8+H    | 7.80377e-59 | 1.000000 | 7.80377e-59 | 1.000000 |
| rad71     | 1.56443e-62 | 1.000000 | 1.56443e-62 | 1.000000 |
| rad8      | 9.43551e-69 | 1.000000 | 9.43551e-69 | 1.000000 |

0.100000000E-08 Pa, 70.0000000 K

=====

| Rate constant             | True (fraction)        | Effective (fraction)   |
|---------------------------|------------------------|------------------------|
| Total                     | 1.91520e-16 (1.00 )    | 1.91520e-16 (1.00 )    |
| Formation of rad19        | 1.91520e-16 (1.000 )   | 1.91520e-16 (1.000 )   |
| H-abstraction to cyc2enyl | 1.01125e-28 (5.28e-13) | 1.01125e-28 (5.28e-13) |
| H-abstraction to cyclenyl | 1.97822e-39 (1.03e-23) | 1.97822e-39 (1.03e-23) |

| species                       | PYtrue      | Cumul    | PYeffective | Cumul    |
|-------------------------------|-------------|----------|-------------|----------|
| Indene+H                      | 0.999753    | 0.999753 | 0.999753    | 0.999753 |
| PhCHCCH2+H                    | 0.000235006 | 0.999988 | 0.000235006 | 0.999988 |
| PhCCH+CH3                     | 4.08659e-06 | 0.999992 | 4.08659e-06 | 0.999992 |
| C2H2+PhCH2                    | 2.94722e-06 | 0.999995 | 2.94722e-06 | 0.999995 |
| PhCCCH3+H                     | 2.31532e-06 | 0.999997 | 2.31532e-06 | 0.999997 |
| Ph+MeAc                       | 1.74394e-06 | 0.999999 | 1.74394e-06 | 0.999999 |
| rad67                         | 5.26090e-07 | 1.000000 | 5.26090e-07 | 1.000000 |
| rad35                         | 2.31978e-07 | 1.000000 | 2.31978e-07 | 1.000000 |
| Ph+Allene                     | 1.56781e-07 | 1.000000 | 1.56781e-07 | 1.000000 |
| PAH7+H                        | 2.03305e-08 | 1.000000 | 2.03305e-08 | 1.000000 |
| PhCH2CCH+H                    | 1.95142e-08 | 1.000000 | 1.95142e-08 | 1.000000 |
| rad39                         | 5.73559e-09 | 1.000000 | 5.73559e-09 | 1.000000 |
| rad37                         | 5.31557e-09 | 1.000000 | 5.31557e-09 | 1.000000 |
| rad30                         | 4.34562e-09 | 1.000000 | 4.34562e-09 | 1.000000 |
| PAH9+H                        | 2.91202e-10 | 1.000000 | 2.91202e-10 | 1.000000 |
| rad38                         | 1.24178e-10 | 1.000000 | 1.24178e-10 | 1.000000 |
| rad60syn                      | 1.96290e-11 | 1.000000 | 1.96290e-11 | 1.000000 |
| rad60anti                     | 9.61777e-12 | 1.000000 | 9.61777e-12 | 1.000000 |
| PAH3+H                        | 8.20481e-12 | 1.000000 | 8.20481e-12 | 1.000000 |
| rad46                         | 7.54709e-12 | 1.000000 | 7.54709e-12 | 1.000000 |
| PAH10+CH3                     | 7.32916e-12 | 1.000000 | 7.32916e-12 | 1.000000 |
| rad59                         | 1.68948e-12 | 1.000000 | 1.68948e-12 | 1.000000 |
| PhcycC3H3_A+H                 | 8.34926e-13 | 1.000000 | 8.34926e-13 | 1.000000 |
| Benzene+cycloprop-2-enylidene | 5.28015e-13 | 1.000000 | 5.28015e-13 | 1.000000 |
| rad43                         | 3.32593e-13 | 1.000000 | 3.32593e-13 | 1.000000 |
| rad54                         | 2.71678e-13 | 1.000000 | 2.71678e-13 | 1.000000 |
| rad62                         | 7.18916e-14 | 1.000000 | 7.18916e-14 | 1.000000 |
| rad50                         | 5.34248e-14 | 1.000000 | 5.34248e-14 | 1.000000 |
| rad70                         | 4.52036e-15 | 1.000000 | 4.52036e-15 | 1.000000 |
| rad55                         | 1.99187e-15 | 1.000000 | 1.99187e-15 | 1.000000 |
| PAH1+H                        | 9.26902e-16 | 1.000000 | 9.26902e-16 | 1.000000 |
| Phenyl+cycC3H4                | 7.87809e-16 | 1.000000 | 0.000000    | 1.000000 |
| rad52                         | 3.56973e-16 | 1.000000 | 3.56973e-16 | 1.000000 |
| rad58                         | 1.11992e-16 | 1.000000 | 1.11992e-16 | 1.000000 |
| rad51                         | 9.25595e-17 | 1.000000 | 9.25595e-17 | 1.000000 |

|                               |             |         |             |         |
|-------------------------------|-------------|---------|-------------|---------|
| rad34                         | 4.90706e-17 | 1.00000 | 4.90706e-17 | 1.00000 |
| rad41                         | 5.95426e-18 | 1.00000 | 5.95426e-18 | 1.00000 |
| rad42                         | 5.64287e-18 | 1.00000 | 5.64287e-18 | 1.00000 |
| rad65                         | 1.88240e-18 | 1.00000 | 1.88240e-18 | 1.00000 |
| PhcycC3H3_B+H                 | 2.38334e-19 | 1.00000 | 2.38334e-19 | 1.00000 |
| Benzene+cycloprop-1-enylidene | 1.03290e-23 | 1.00000 | 1.03290e-23 | 1.00000 |
| rad53                         | 5.56944e-24 | 1.00000 | 5.56944e-24 | 1.00000 |
| rad64                         | 3.39556e-26 | 1.00000 | 3.39556e-26 | 1.00000 |
| rad61                         | 5.68423e-32 | 1.00000 | 5.68423e-32 | 1.00000 |
| rad26                         | 1.15389e-34 | 1.00000 | 1.15389e-34 | 1.00000 |
| rad47                         | 9.65474e-35 | 1.00000 | 9.65474e-35 | 1.00000 |
| rad28                         | 2.91725e-35 | 1.00000 | 2.91725e-35 | 1.00000 |
| rad56                         | 2.32701e-35 | 1.00000 | 2.32701e-35 | 1.00000 |
| rad6                          | 6.12194e-36 | 1.00000 | 6.12194e-36 | 1.00000 |
| rad2                          | 6.61546e-37 | 1.00000 | 6.61546e-37 | 1.00000 |
| rad1                          | 4.21045e-38 | 1.00000 | 4.21045e-38 | 1.00000 |
| rad14                         | 3.87159e-38 | 1.00000 | 3.87159e-38 | 1.00000 |
| rad10                         | 2.35488e-38 | 1.00000 | 2.35488e-38 | 1.00000 |
| rad25                         | 1.86907e-38 | 1.00000 | 1.86907e-38 | 1.00000 |
| rad19anti                     | 1.14994e-38 | 1.00000 | 1.14994e-38 | 1.00000 |
| rad3                          | 1.14508e-38 | 1.00000 | 1.14508e-38 | 1.00000 |
| rad4                          | 5.79310e-39 | 1.00000 | 5.79310e-39 | 1.00000 |
| rad27                         | 3.85070e-39 | 1.00000 | 3.85070e-39 | 1.00000 |
| rad7                          | 4.44492e-40 | 1.00000 | 4.44492e-40 | 1.00000 |
| rad11                         | 1.67109e-40 | 1.00000 | 1.67109e-40 | 1.00000 |
| rad9                          | 3.45518e-41 | 1.00000 | 3.45518e-41 | 1.00000 |
| rad5                          | 6.30744e-42 | 1.00000 | 6.30744e-42 | 1.00000 |
| rad13                         | 2.46872e-42 | 1.00000 | 2.46872e-42 | 1.00000 |
| rad31                         | 5.25659e-43 | 1.00000 | 5.25659e-43 | 1.00000 |
| rad33                         | 1.84123e-43 | 1.00000 | 1.84123e-43 | 1.00000 |
| rad15                         | 1.52211e-44 | 1.00000 | 1.52211e-44 | 1.00000 |
| rad68syn                      | 8.35689e-45 | 1.00000 | 8.35689e-45 | 1.00000 |
| rad68anti                     | 7.12847e-45 | 1.00000 | 7.12847e-45 | 1.00000 |
| rad20                         | 1.35925e-45 | 1.00000 | 1.35925e-45 | 1.00000 |
| rad21                         | 1.09260e-45 | 1.00000 | 1.09260e-45 | 1.00000 |
| rad18                         | 1.46619e-47 | 1.00000 | 1.46619e-47 | 1.00000 |
| rad12                         | 1.43815e-47 | 1.00000 | 1.43815e-47 | 1.00000 |
| rad19syn                      | 3.07655e-48 | 1.00000 | 3.07655e-48 | 1.00000 |
| rad22                         | 6.74509e-50 | 1.00000 | 6.74509e-50 | 1.00000 |
| rad23                         | 5.52245e-50 | 1.00000 | 5.52245e-50 | 1.00000 |
| rad24                         | 2.36068e-51 | 1.00000 | 2.36068e-51 | 1.00000 |
| rad45                         | 4.23741e-52 | 1.00000 | 4.23741e-52 | 1.00000 |
| rad73                         | 9.69701e-53 | 1.00000 | 9.69701e-53 | 1.00000 |
| rad40syn                      | 2.86238e-53 | 1.00000 | 2.86238e-53 | 1.00000 |
| rad36                         | 2.59476e-53 | 1.00000 | 2.59476e-53 | 1.00000 |
| rad40anti                     | 2.34562e-53 | 1.00000 | 2.34562e-53 | 1.00000 |
| PAH8+H                        | 1.67105e-57 | 1.00000 | 1.67105e-57 | 1.00000 |
| rad71                         | 3.35676e-61 | 1.00000 | 3.35676e-61 | 1.00000 |
| rad8                          | 1.06794e-68 | 1.00000 | 1.06794e-68 | 1.00000 |

0.100000000E-08 Pa, 80.0000000 K

=====

| Rate constant             | True (fraction)        | Effective (fraction)   |
|---------------------------|------------------------|------------------------|
| Total                     | 4.17084e-16 (1.00 )    | 4.17084e-16 (1.00 )    |
| Formation of rad19        | 4.17084e-16 (1.000 )   | 4.17084e-16 (1.000 )   |
| H-abstraction to cyc2enyl | 8.98751e-27 (2.15e-11) | 8.98751e-27 (2.15e-11) |
| H-abstraction to cyclenyl | 4.00120e-36 (9.59e-21) | 4.00120e-36 (9.59e-21) |

| species                       | PYtrue      | Cumul    | PYeffective | Cumul    |
|-------------------------------|-------------|----------|-------------|----------|
| Indene+H                      | 0.999747    | 0.999747 | 0.999747    | 0.999747 |
| PhCHCCH2+H                    | 0.000240278 | 0.999987 | 0.000240278 | 0.999987 |
| PhCCH+CH3                     | 4.18618e-06 | 0.999991 | 4.18618e-06 | 0.999991 |
| C2H2+PhCH2                    | 3.03335e-06 | 0.999994 | 3.03335e-06 | 0.999994 |
| PhCCCH3+H                     | 2.37733e-06 | 0.999997 | 2.37733e-06 | 0.999997 |
| Ph+MeAc                       | 1.80101e-06 | 0.999999 | 1.80101e-06 | 0.999999 |
| rad67                         | 5.42408e-07 | 0.999999 | 5.42408e-07 | 0.999999 |
| rad35                         | 2.38874e-07 | 0.999999 | 2.38874e-07 | 0.999999 |
| Ph+Allene                     | 1.63686e-07 | 1.000000 | 1.63686e-07 | 1.000000 |
| PAH7+H                        | 2.10959e-08 | 1.000000 | 2.10959e-08 | 1.000000 |
| PhCH2CCH+H                    | 2.05146e-08 | 1.000000 | 2.05146e-08 | 1.000000 |
| rad39                         | 5.95207e-09 | 1.000000 | 5.95207e-09 | 1.000000 |
| rad37                         | 5.52806e-09 | 1.000000 | 5.52806e-09 | 1.000000 |
| rad30                         | 4.47786e-09 | 1.000000 | 4.47786e-09 | 1.000000 |
| PAH9+H                        | 3.02716e-10 | 1.000000 | 3.02716e-10 | 1.000000 |
| rad38                         | 1.29567e-10 | 1.000000 | 1.29567e-10 | 1.000000 |
| Benzene+cycloprop-2-enylidene | 2.15484e-11 | 1.000000 | 2.15484e-11 | 1.000000 |
| rad60syn                      | 2.04685e-11 | 1.000000 | 2.04685e-11 | 1.000000 |
| rad60anti                     | 1.00397e-11 | 1.000000 | 1.00397e-11 | 1.000000 |

|                               |             |          |             |          |
|-------------------------------|-------------|----------|-------------|----------|
| PAH3+H                        | 8.68358e-12 | 1.000000 | 8.68358e-12 | 1.000000 |
| PAH10+CH3                     | 7.94154e-12 | 1.000000 | 7.94154e-12 | 1.000000 |
| rad46                         | 7.89977e-12 | 1.000000 | 7.89977e-12 | 1.000000 |
| rad59                         | 1.78410e-12 | 1.000000 | 1.78410e-12 | 1.000000 |
| PhcycC3H3_A+H                 | 1.01061e-12 | 1.000000 | 1.01061e-12 | 1.000000 |
| rad43                         | 3.57097e-13 | 1.000000 | 3.57097e-13 | 1.000000 |
| rad54                         | 2.94055e-13 | 1.000000 | 2.94055e-13 | 1.000000 |
| rad62                         | 7.73784e-14 | 1.000000 | 7.73784e-14 | 1.000000 |
| rad50                         | 5.70981e-14 | 1.000000 | 5.70981e-14 | 1.000000 |
| rad70                         | 5.01449e-15 | 1.000000 | 5.01449e-15 | 1.000000 |
| rad55                         | 2.21137e-15 | 1.000000 | 2.21137e-15 | 1.000000 |
| Phenyl+cycC3H4                | 1.32430e-15 | 1.000000 | 0.000000    | 1.000000 |
| PAH1+H                        | 1.07021e-15 | 1.000000 | 1.07021e-15 | 1.000000 |
| rad52                         | 3.87617e-16 | 1.000000 | 3.87617e-16 | 1.000000 |
| rad58                         | 1.25561e-16 | 1.000000 | 1.25561e-16 | 1.000000 |
| rad51                         | 1.02472e-16 | 1.000000 | 1.02472e-16 | 1.000000 |
| rad34                         | 5.67860e-17 | 1.000000 | 5.67860e-17 | 1.000000 |
| rad41                         | 7.33020e-18 | 1.000000 | 7.33020e-18 | 1.000000 |
| rad42                         | 6.74822e-18 | 1.000000 | 6.74822e-18 | 1.000000 |
| rad65                         | 2.10442e-18 | 1.000000 | 2.10442e-18 | 1.000000 |
| PhcycC3H3_B+H                 | 1.96138e-18 | 1.000000 | 1.96138e-18 | 1.000000 |
| Benzene+cycloprop-1-enylidene | 9.59328e-21 | 1.000000 | 9.59328e-21 | 1.000000 |
| rad53                         | 4.18956e-23 | 1.000000 | 4.18956e-23 | 1.000000 |
| rad64                         | 5.09107e-25 | 1.000000 | 5.09107e-25 | 1.000000 |
| rad61                         | 8.41954e-30 | 1.000000 | 8.41954e-30 | 1.000000 |
| rad56                         | 1.31867e-32 | 1.000000 | 1.31867e-32 | 1.000000 |
| rad68syn                      | 1.87136e-34 | 1.000000 | 1.87136e-34 | 1.000000 |
| rad68anti                     | 1.57600e-34 | 1.000000 | 1.57600e-34 | 1.000000 |
| rad26                         | 9.74089e-35 | 1.000000 | 9.74089e-35 | 1.000000 |
| rad47                         | 8.54859e-35 | 1.000000 | 8.54859e-35 | 1.000000 |
| rad28                         | 2.44871e-35 | 1.000000 | 2.44871e-35 | 1.000000 |
| rad6                          | 4.90205e-36 | 1.000000 | 4.90205e-36 | 1.000000 |
| rad2                          | 3.03384e-37 | 1.000000 | 3.03384e-37 | 1.000000 |
| rad14                         | 3.41130e-38 | 1.000000 | 3.41130e-38 | 1.000000 |
| rad1                          | 1.93611e-38 | 1.000000 | 1.93611e-38 | 1.000000 |
| rad25                         | 1.66998e-38 | 1.000000 | 1.66998e-38 | 1.000000 |
| rad19anti                     | 1.65192e-38 | 1.000000 | 1.65192e-38 | 1.000000 |
| rad10                         | 1.50914e-38 | 1.000000 | 1.50914e-38 | 1.000000 |
| rad27                         | 3.45956e-39 | 1.000000 | 3.45956e-39 | 1.000000 |
| rad3                          | 2.14076e-39 | 1.000000 | 2.14076e-39 | 1.000000 |
| rad4                          | 1.08377e-39 | 1.000000 | 1.08377e-39 | 1.000000 |
| rad7                          | 3.56511e-40 | 1.000000 | 3.56511e-40 | 1.000000 |
| rad11                         | 1.40105e-40 | 1.000000 | 1.40105e-40 | 1.000000 |
| rad9                          | 3.65418e-41 | 1.000000 | 3.65418e-41 | 1.000000 |
| rad5                          | 5.43156e-42 | 1.000000 | 5.43156e-42 | 1.000000 |
| rad13                         | 1.98306e-42 | 1.000000 | 1.98306e-42 | 1.000000 |
| rad31                         | 6.77588e-43 | 1.000000 | 6.77588e-43 | 1.000000 |
| rad33                         | 1.75650e-43 | 1.000000 | 1.75650e-43 | 1.000000 |
| rad15                         | 1.60841e-44 | 1.000000 | 1.60841e-44 | 1.000000 |
| rad20                         | 1.33871e-45 | 1.000000 | 1.33871e-45 | 1.000000 |
| rad21                         | 1.08175e-45 | 1.000000 | 1.08175e-45 | 1.000000 |
| rad12                         | 1.63785e-47 | 1.000000 | 1.63785e-47 | 1.000000 |
| rad18                         | 1.36598e-47 | 1.000000 | 1.36598e-47 | 1.000000 |
| rad19syn                      | 5.56519e-48 | 1.000000 | 5.56519e-48 | 1.000000 |
| rad23                         | 6.21110e-50 | 1.000000 | 6.21110e-50 | 1.000000 |
| rad22                         | 6.07794e-50 | 1.000000 | 6.07794e-50 | 1.000000 |
| rad73                         | 1.03568e-50 | 1.000000 | 1.03568e-50 | 1.000000 |
| rad24                         | 2.55627e-51 | 1.000000 | 2.55627e-51 | 1.000000 |
| rad40syn                      | 2.29075e-51 | 1.000000 | 2.29075e-51 | 1.000000 |
| rad40anti                     | 1.86932e-51 | 1.000000 | 1.86932e-51 | 1.000000 |
| rad45                         | 1.21389e-51 | 1.000000 | 1.21389e-51 | 1.000000 |
| rad36                         | 7.43123e-53 | 1.000000 | 7.43123e-53 | 1.000000 |
| PAH8+H                        | 1.56151e-55 | 1.000000 | 1.56151e-55 | 1.000000 |
| rad71                         | 3.88539e-59 | 1.000000 | 3.88539e-59 | 1.000000 |
| rad8                          | 1.28435e-68 | 1.000000 | 1.28435e-68 | 1.000000 |

0.100000000E-08 Pa, 90.000000 K

| Rate constant             | True (fraction)        | Effective (fraction)   |             |          |
|---------------------------|------------------------|------------------------|-------------|----------|
| Total                     | 7.74016e-16 (1.00 )    | 7.74016e-16 (1.00 )    |             |          |
| Formation of rad19        | 7.74016e-16 (1.000 )   | 7.74016e-16 (1.000 )   |             |          |
| H-abstraction to cyc2enyl | 2.91736e-25 (3.77e-10) | 2.91736e-25 (3.77e-10) |             |          |
| H-abstraction to cyclenyl | 1.47814e-33 (1.91e-18) | 1.47814e-33 (1.91e-18) |             |          |
| species                   | PYtrue                 | Cumul                  | PYeffective | Cumul    |
| Indene+H                  | 0.999741               | 0.999741               | 0.999741    | 0.999741 |
| PhCHCCH2+H                | 0.000245933            | 0.999987               | 0.000245933 | 0.999987 |
| PhCCH+CH3                 | 4.29301e-06            | 0.999991               | 4.29301e-06 | 0.999991 |

|                               |             |          |             |          |
|-------------------------------|-------------|----------|-------------|----------|
| C2H2+PhCH2                    | 3.12644e-06 | 0.999994 | 3.12644e-06 | 0.999994 |
| PhCCCH3+H                     | 2.44411e-06 | 0.999997 | 2.44411e-06 | 0.999997 |
| Ph+MeAc                       | 1.86289e-06 | 0.999999 | 1.86289e-06 | 0.999999 |
| rad67                         | 5.60078e-07 | 0.999999 | 5.60078e-07 | 0.999999 |
| rad35                         | 2.46332e-07 | 0.999999 | 2.46332e-07 | 0.999999 |
| Ph+Allene                     | 1.71280e-07 | 1.000000 | 1.71280e-07 | 1.000000 |
| PAH7+H                        | 2.19315e-08 | 1.000000 | 2.19315e-08 | 1.000000 |
| PhCH2CCH+H                    | 2.16239e-08 | 1.000000 | 2.16239e-08 | 1.000000 |
| rad39                         | 6.18834e-09 | 1.000000 | 6.18834e-09 | 1.000000 |
| rad37                         | 5.76057e-09 | 1.000000 | 5.76057e-09 | 1.000000 |
| rad30                         | 4.62113e-09 | 1.000000 | 4.62113e-09 | 1.000000 |
| Benzene+cycloprop-2-enylidene | 3.76912e-10 | 1.000000 | 3.76912e-10 | 1.000000 |
| PAH9+H                        | 3.15328e-10 | 1.000000 | 3.15328e-10 | 1.000000 |
| rad38                         | 1.35501e-10 | 1.000000 | 1.35501e-10 | 1.000000 |
| rad60syn                      | 2.13909e-11 | 1.000000 | 2.13909e-11 | 1.000000 |
| rad60anti                     | 1.05039e-11 | 1.000000 | 1.05039e-11 | 1.000000 |
| PAH3+H                        | 9.21902e-12 | 1.000000 | 9.21902e-12 | 1.000000 |
| PAH10+CH3                     | 8.64384e-12 | 1.000000 | 8.64384e-12 | 1.000000 |
| rad46                         | 8.28938e-12 | 1.000000 | 8.28938e-12 | 1.000000 |
| rad59                         | 1.88961e-12 | 1.000000 | 1.88961e-12 | 1.000000 |
| PhcycC3H3_A+H                 | 1.23243e-12 | 1.000000 | 1.23243e-12 | 1.000000 |
| rad43                         | 3.84868e-13 | 1.000000 | 3.84868e-13 | 1.000000 |
| rad54                         | 3.19699e-13 | 1.000000 | 3.19699e-13 | 1.000000 |
| rad62                         | 8.36058e-14 | 1.000000 | 8.36058e-14 | 1.000000 |
| rad50                         | 6.12578e-14 | 1.000000 | 6.12578e-14 | 1.000000 |
| rad70                         | 5.59584e-15 | 1.000000 | 5.59584e-15 | 1.000000 |
| rad55                         | 2.46957e-15 | 1.000000 | 2.46957e-15 | 1.000000 |
| Phenyl+cycC3H4                | 2.14284e-15 | 1.000000 | 0.00000     | 1.000000 |
| PAH1+H                        | 1.24557e-15 | 1.000000 | 1.24557e-15 | 1.000000 |
| rad52                         | 4.22957e-16 | 1.000000 | 4.22957e-16 | 1.000000 |
| rad58                         | 1.41714e-16 | 1.000000 | 1.41714e-16 | 1.000000 |
| rad51                         | 1.14155e-16 | 1.000000 | 1.14155e-16 | 1.000000 |
| rad34                         | 6.62496e-17 | 1.000000 | 6.62496e-17 | 1.000000 |
| PhcycC3H3_B+H                 | 1.04002e-17 | 1.000000 | 1.04002e-17 | 1.000000 |
| rad41                         | 9.07988e-18 | 1.000000 | 9.07988e-18 | 1.000000 |
| rad42                         | 8.13587e-18 | 1.000000 | 8.13587e-18 | 1.000000 |
| rad65                         | 2.36870e-18 | 1.000000 | 2.36870e-18 | 1.000000 |
| Benzene+cycloprop-1-enylidene | 1.90970e-18 | 1.000000 | 1.90970e-18 | 1.000000 |
| rad53                         | 2.02296e-22 | 1.000000 | 2.02296e-22 | 1.000000 |
| rad64                         | 4.24438e-24 | 1.000000 | 4.24438e-24 | 1.000000 |
| rad61                         | 4.05748e-28 | 1.000000 | 4.05748e-28 | 1.000000 |
| rad56                         | 1.28600e-30 | 1.000000 | 1.28600e-30 | 1.000000 |
| rad68syn                      | 2.85402e-32 | 1.000000 | 2.85402e-32 | 1.000000 |
| rad68anti                     | 2.36878e-32 | 1.000000 | 2.36878e-32 | 1.000000 |
| rad26                         | 8.41204e-35 | 1.000000 | 8.41204e-35 | 1.000000 |
| rad47                         | 7.75924e-35 | 1.000000 | 7.75924e-35 | 1.000000 |
| rad28                         | 2.10229e-35 | 1.000000 | 2.10229e-35 | 1.000000 |
| rad6                          | 4.06691e-36 | 1.000000 | 4.06691e-36 | 1.000000 |
| rad2                          | 3.38258e-37 | 1.000000 | 3.38258e-37 | 1.000000 |
| rad14                         | 3.08466e-38 | 1.000000 | 3.08466e-38 | 1.000000 |
| rad19anti                     | 2.57295e-38 | 1.000000 | 2.57295e-38 | 1.000000 |
| rad10                         | 2.55114e-38 | 1.000000 | 2.55114e-38 | 1.000000 |
| rad1                          | 2.16494e-38 | 1.000000 | 2.16494e-38 | 1.000000 |
| rad25                         | 1.53223e-38 | 1.000000 | 1.53223e-38 | 1.000000 |
| rad27                         | 3.19398e-39 | 1.000000 | 3.19398e-39 | 1.000000 |
| rad3                          | 2.58540e-39 | 1.000000 | 2.58540e-39 | 1.000000 |
| rad73                         | 1.45329e-39 | 1.000000 | 1.45329e-39 | 1.000000 |
| rad4                          | 1.30971e-39 | 1.000000 | 1.30971e-39 | 1.000000 |
| rad7                          | 2.96296e-40 | 1.000000 | 2.96296e-40 | 1.000000 |
| rad11                         | 1.21731e-40 | 1.000000 | 1.21731e-40 | 1.000000 |
| rad9                          | 4.03059e-41 | 1.000000 | 4.03059e-41 | 1.000000 |
| rad5                          | 4.79392e-42 | 1.000000 | 4.79392e-42 | 1.000000 |
| rad13                         | 1.65094e-42 | 1.000000 | 1.65094e-42 | 1.000000 |
| rad31                         | 9.34525e-43 | 1.000000 | 9.34525e-43 | 1.000000 |
| rad33                         | 1.73110e-43 | 1.000000 | 1.73110e-43 | 1.000000 |
| rad15                         | 1.77286e-44 | 1.000000 | 1.77286e-44 | 1.000000 |
| rad20                         | 1.36378e-45 | 1.000000 | 1.36378e-45 | 1.000000 |
| rad21                         | 1.10832e-45 | 1.000000 | 1.10832e-45 | 1.000000 |
| rad12                         | 1.95510e-47 | 1.000000 | 1.95510e-47 | 1.000000 |
| rad18                         | 1.31008e-47 | 1.000000 | 1.31008e-47 | 1.000000 |
| rad19syn                      | 1.05530e-47 | 1.000000 | 1.05530e-47 | 1.000000 |
| rad40syn                      | 5.28600e-49 | 1.000000 | 5.28600e-49 | 1.000000 |
| rad40anti                     | 4.29340e-49 | 1.000000 | 4.29340e-49 | 1.000000 |
| rad23                         | 7.73362e-50 | 1.000000 | 7.73362e-50 | 1.000000 |
| rad22                         | 5.62236e-50 | 1.000000 | 5.62236e-50 | 1.000000 |
| rad24                         | 2.88490e-51 | 1.000000 | 2.88490e-51 | 1.000000 |
| rad45                         | 3.22779e-52 | 1.000000 | 3.22779e-52 | 1.000000 |
| PAH8+H                        | 4.16081e-53 | 1.000000 | 4.16081e-53 | 1.000000 |
| rad36                         | 1.97582e-53 | 1.000000 | 1.97582e-53 | 1.000000 |
| rad71                         | 1.29280e-56 | 1.000000 | 1.29280e-56 | 1.000000 |

rad8 | 1.61985e-68 1.000000 | 1.61985e-68 1.000000

0.100000000E-08 Pa, 100.000000 K

=====  
Rate constant | True (fraction) | Effective (fraction)  
-----  
Total | 1.28255e-15 (1.00 ) | 1.28255e-15 (1.00 )  
Formation of rad19 | 1.28255e-15 (1.000 ) | 1.28255e-15 (1.000 )  
H-abstraction to cyc2enyl | 4.68359e-24 (3.65e-09) | 4.68359e-24 (3.65e-09)  
H-abstraction to cyclenyl | 1.66242e-31 (1.30e-16) | 1.66242e-31 (1.30e-16)

| species                       | PYtrue      | Cumul    | PYeffective | Cumul    |
|-------------------------------|-------------|----------|-------------|----------|
| Indene+H                      | 0.999735    | 0.999735 | 0.999735    | 0.999735 |
| PhCHCCH2+H                    | 0.000251988 | 0.999987 | 0.000251988 | 0.999987 |
| PhCCH+CH3                     | 4.40736e-06 | 0.999991 | 4.40736e-06 | 0.999991 |
| C2H2+PhCH2                    | 3.22690e-06 | 0.999995 | 3.22690e-06 | 0.999995 |
| PhCCCH3+H                     | 2.51589e-06 | 0.999997 | 2.51589e-06 | 0.999997 |
| Ph+MeAc                       | 1.92987e-06 | 0.999999 | 1.92987e-06 | 0.999999 |
| rad67                         | 5.79181e-07 | 1.000000 | 5.79181e-07 | 1.000000 |
| rad35                         | 2.54382e-07 | 1.000000 | 2.54382e-07 | 1.000000 |
| Ph+Allene                     | 1.79627e-07 | 1.000000 | 1.79627e-07 | 1.000000 |
| PhCH2CCH+H                    | 2.28536e-08 | 1.000000 | 2.28536e-08 | 1.000000 |
| PAH7+H                        | 2.28426e-08 | 1.000000 | 2.28426e-08 | 1.000000 |
| rad39                         | 6.44590e-09 | 1.000000 | 6.44590e-09 | 1.000000 |
| rad37                         | 6.01471e-09 | 1.000000 | 6.01471e-09 | 1.000000 |
| rad30                         | 4.77610e-09 | 1.000000 | 4.77610e-09 | 1.000000 |
| Benzene+cycloprop-2-enylidene | 3.65179e-09 | 1.000000 | 3.65179e-09 | 1.000000 |
| PAH9+H                        | 3.29134e-10 | 1.000000 | 3.29134e-10 | 1.000000 |
| rad38                         | 1.42033e-10 | 1.000000 | 1.42033e-10 | 1.000000 |
| rad60syn                      | 2.24039e-11 | 1.000000 | 2.24039e-11 | 1.000000 |
| rad60anti                     | 1.10144e-11 | 1.000000 | 1.10144e-11 | 1.000000 |
| PAH3+H                        | 9.81802e-12 | 1.000000 | 9.81802e-12 | 1.000000 |
| PAH10+CH3                     | 9.45058e-12 | 1.000000 | 9.45058e-12 | 1.000000 |
| rad46                         | 8.71962e-12 | 1.000000 | 8.71962e-12 | 1.000000 |
| rad59                         | 2.00730e-12 | 1.000000 | 2.00730e-12 | 1.000000 |
| PhcycC3H3_A+H                 | 1.51348e-12 | 1.000000 | 1.51348e-12 | 1.000000 |
| rad43                         | 4.16368e-13 | 1.000000 | 4.16368e-13 | 1.000000 |
| rad54                         | 3.49137e-13 | 1.000000 | 3.49137e-13 | 1.000000 |
| rad62                         | 9.06791e-14 | 1.000000 | 9.06791e-14 | 1.000000 |
| rad50                         | 6.59742e-14 | 1.000000 | 6.59742e-14 | 1.000000 |
| rad70                         | 6.28192e-15 | 1.000000 | 6.28192e-15 | 1.000000 |
| Phenyl+cycC3H4                | 3.36905e-15 | 1.000000 | 0.000000    | 1.000000 |
| rad55                         | 2.77429e-15 | 1.000000 | 2.77429e-15 | 1.000000 |
| PAH1+H                        | 1.46129e-15 | 1.000000 | 1.46129e-15 | 1.000000 |
| rad52                         | 4.63813e-16 | 1.000000 | 4.63813e-16 | 1.000000 |
| rad58                         | 1.61019e-16 | 1.000000 | 1.61019e-16 | 1.000000 |
| Benzene+cycloprop-1-enylidene | 1.29619e-16 | 1.000000 | 1.29619e-16 | 1.000000 |
| rad51                         | 1.27976e-16 | 1.000000 | 1.27976e-16 | 1.000000 |
| rad34                         | 7.79214e-17 | 1.000000 | 7.79214e-17 | 1.000000 |
| PhcycC3H3_B+H                 | 4.09123e-17 | 1.000000 | 4.09123e-17 | 1.000000 |
| rad41                         | 1.13186e-17 | 1.000000 | 1.13186e-17 | 1.000000 |
| rad42                         | 9.88346e-18 | 1.000000 | 9.88346e-18 | 1.000000 |
| rad65                         | 2.68465e-18 | 1.000000 | 2.68465e-18 | 1.000000 |
| rad53                         | 7.24662e-22 | 1.000000 | 7.24662e-22 | 1.000000 |
| rad64                         | 2.36968e-23 | 1.000000 | 2.36968e-23 | 1.000000 |
| rad61                         | 9.04334e-27 | 1.000000 | 9.04334e-27 | 1.000000 |
| rad56                         | 5.01134e-29 | 1.000000 | 5.01134e-29 | 1.000000 |
| rad68syn                      | 1.54810e-30 | 1.000000 | 1.54810e-30 | 1.000000 |
| rad68anti                     | 1.27120e-30 | 1.000000 | 1.27120e-30 | 1.000000 |
| rad26                         | 7.39233e-35 | 1.000000 | 7.39233e-35 | 1.000000 |
| rad47                         | 7.18611e-35 | 1.000000 | 7.18611e-35 | 1.000000 |
| rad28                         | 1.83624e-35 | 1.000000 | 1.83624e-35 | 1.000000 |
| rad6                          | 3.46577e-36 | 1.000000 | 3.46577e-36 | 1.000000 |
| rad40syn                      | 1.99128e-36 | 1.000000 | 1.99128e-36 | 1.000000 |
| rad40anti                     | 1.51571e-36 | 1.000000 | 1.51571e-36 | 1.000000 |
| rad73                         | 7.52968e-37 | 1.000000 | 7.52968e-37 | 1.000000 |
| rad2                          | 1.41430e-37 | 1.000000 | 1.41430e-37 | 1.000000 |
| rad19anti                     | 4.30712e-38 | 1.000000 | 4.30712e-38 | 1.000000 |
| rad14                         | 2.84662e-38 | 1.000000 | 2.84662e-38 | 1.000000 |
| rad10                         | 2.07323e-38 | 1.000000 | 2.07323e-38 | 1.000000 |
| rad25                         | 1.43548e-38 | 1.000000 | 1.43548e-38 | 1.000000 |
| rad1                          | 9.08155e-39 | 1.000000 | 9.08155e-39 | 1.000000 |
| rad27                         | 3.01287e-39 | 1.000000 | 3.01287e-39 | 1.000000 |
| rad3                          | 7.24370e-40 | 1.000000 | 7.24370e-40 | 1.000000 |
| rad4                          | 3.67207e-40 | 1.000000 | 3.67207e-40 | 1.000000 |
| rad7                          | 2.52971e-40 | 1.000000 | 2.52971e-40 | 1.000000 |
| rad11                         | 1.08727e-40 | 1.000000 | 1.08727e-40 | 1.000000 |
| rad9                          | 4.60287e-41 | 1.000000 | 4.60287e-41 | 1.000000 |
| rad5                          | 4.31100e-42 | 1.000000 | 4.31100e-42 | 1.000000 |

|          |             |         |             |         |
|----------|-------------|---------|-------------|---------|
| rad13    | 1.41227e-42 | 1.00000 | 1.41227e-42 | 1.00000 |
| rad31    | 1.36778e-42 | 1.00000 | 1.36778e-42 | 1.00000 |
| rad33    | 1.75118e-43 | 1.00000 | 1.75118e-43 | 1.00000 |
| rad15    | 2.02357e-44 | 1.00000 | 2.02357e-44 | 1.00000 |
| rad20    | 1.42769e-45 | 1.00000 | 1.42769e-45 | 1.00000 |
| rad21    | 1.16740e-45 | 1.00000 | 1.16740e-45 | 1.00000 |
| rad12    | 2.42764e-47 | 1.00000 | 2.42764e-47 | 1.00000 |
| rad19syn | 2.08907e-47 | 1.00000 | 2.08907e-47 | 1.00000 |
| rad18    | 1.28545e-47 | 1.00000 | 1.28545e-47 | 1.00000 |
| rad23    | 1.06298e-49 | 1.00000 | 1.06298e-49 | 1.00000 |
| rad22    | 5.30744e-50 | 1.00000 | 5.30744e-50 | 1.00000 |
| PAH8+H   | 2.22239e-50 | 1.00000 | 2.22239e-50 | 1.00000 |
| rad24    | 3.36884e-51 | 1.00000 | 3.36884e-51 | 1.00000 |
| rad45    | 5.38789e-52 | 1.00000 | 5.38789e-52 | 1.00000 |
| rad36    | 3.29814e-53 | 1.00000 | 3.29814e-53 | 1.00000 |
| rad71    | 8.99607e-54 | 1.00000 | 8.99607e-54 | 1.00000 |
| rad8     | 2.12436e-68 | 1.00000 | 2.12436e-68 | 1.00000 |

0.100000000E-08 Pa, 110.000000 K

| Rate constant             | True (fraction)        | Effective (fraction)   |
|---------------------------|------------------------|------------------------|
| Total                     | 1.95524e-15 (1.00 )    | 1.95524e-15 (1.00 )    |
| Formation of rad19        | 1.95524e-15 (1.000 )   | 1.95524e-15 (1.000 )   |
| H-abstraction to cyc2enyl | 4.50936e-23 (2.31e-08) | 4.50936e-23 (2.31e-08) |
| H-abstraction to cyclenyl | 7.87782e-30 (4.03e-15) | 7.87782e-30 (4.03e-15) |

| species                       | PYtrue      | Cumul    | PYeffective | Cumul    |
|-------------------------------|-------------|----------|-------------|----------|
| Indene+H                      | 0.999728    | 0.999728 | 0.999728    | 0.999728 |
| PhCHCCH2+H                    | 0.000258470 | 0.999986 | 0.000258470 | 0.999986 |
| PhCCH+CH3                     | 4.52973e-06 | 0.999991 | 4.52973e-06 | 0.999991 |
| C2H2+PhCH2                    | 3.33534e-06 | 0.999994 | 3.33534e-06 | 0.999994 |
| PhCCCH3+H                     | 2.59304e-06 | 0.999997 | 2.59304e-06 | 0.999997 |
| Ph+MeAc                       | 2.00241e-06 | 0.999999 | 2.00241e-06 | 0.999999 |
| rad67                         | 5.99841e-07 | 1.000000 | 5.99841e-07 | 1.000000 |
| rad35                         | 2.63077e-07 | 1.000000 | 2.63077e-07 | 1.000000 |
| Ph+Allene                     | 1.88813e-07 | 1.000000 | 1.88813e-07 | 1.000000 |
| PhCH2CCH+H                    | 2.42192e-08 | 1.000000 | 2.42192e-08 | 1.000000 |
| PAH7+H                        | 2.38371e-08 | 1.000000 | 2.38371e-08 | 1.000000 |
| Benzene+cycloprop-2-enylidene | 2.30629e-08 | 1.000000 | 2.30629e-08 | 1.000000 |
| rad39                         | 6.72692e-09 | 1.000000 | 6.72692e-09 | 1.000000 |
| rad37                         | 6.29278e-09 | 1.000000 | 6.29278e-09 | 1.000000 |
| rad30                         | 4.94382e-09 | 1.000000 | 4.94382e-09 | 1.000000 |
| PAH9+H                        | 3.44262e-10 | 1.000000 | 3.44262e-10 | 1.000000 |
| rad38                         | 1.49234e-10 | 1.000000 | 1.49234e-10 | 1.000000 |
| rad60syn                      | 2.35177e-11 | 1.000000 | 2.35177e-11 | 1.000000 |
| rad60anti                     | 1.15765e-11 | 1.000000 | 1.15765e-11 | 1.000000 |
| PAH3+H                        | 1.04898e-11 | 1.000000 | 1.04898e-11 | 1.000000 |
| PAH10+CH3                     | 1.03809e-11 | 1.000000 | 1.03809e-11 | 1.000000 |
| rad46                         | 9.19554e-12 | 1.000000 | 9.19554e-12 | 1.000000 |
| rad59                         | 2.13885e-12 | 1.000000 | 2.13885e-12 | 1.000000 |
| PhcycC3H3_A+H                 | 1.87147e-12 | 1.000000 | 1.87147e-12 | 1.000000 |
| rad43                         | 4.52200e-13 | 1.000000 | 4.52200e-13 | 1.000000 |
| rad54                         | 3.83059e-13 | 1.000000 | 3.83059e-13 | 1.000000 |
| rad62                         | 9.87359e-14 | 1.000000 | 9.87359e-14 | 1.000000 |
| rad50                         | 7.13397e-14 | 1.000000 | 7.13397e-14 | 1.000000 |
| rad70                         | 7.09592e-15 | 1.000000 | 7.09592e-15 | 1.000000 |
| Phenyl+cycC3H4                | 5.18630e-15 | 1.000000 | 0.000000    | 1.000000 |
| Benzene+cycloprop-1-enylidene | 4.02908e-15 | 1.000000 | 4.02908e-15 | 1.000000 |
| rad55                         | 3.13590e-15 | 1.000000 | 3.13590e-15 | 1.000000 |
| PAH1+H                        | 1.72857e-15 | 1.000000 | 1.72857e-15 | 1.000000 |
| rad52                         | 5.11263e-16 | 1.000000 | 5.11263e-16 | 1.000000 |
| rad58                         | 1.84232e-16 | 1.000000 | 1.84232e-16 | 1.000000 |
| rad51                         | 1.44427e-16 | 1.000000 | 1.44427e-16 | 1.000000 |
| PhcycC3H3_B+H                 | 1.30407e-16 | 1.000000 | 1.30407e-16 | 1.000000 |
| rad34                         | 9.24233e-17 | 1.000000 | 9.24233e-17 | 1.000000 |
| rad41                         | 1.42061e-17 | 1.000000 | 1.42061e-17 | 1.000000 |
| rad42                         | 1.20969e-17 | 1.000000 | 1.20969e-17 | 1.000000 |
| rad65                         | 3.06485e-18 | 1.000000 | 3.06485e-18 | 1.000000 |
| rad53                         | 2.11093e-21 | 1.000000 | 2.11093e-21 | 1.000000 |
| rad64                         | 9.96387e-23 | 1.000000 | 9.96387e-23 | 1.000000 |
| rad61                         | 1.15972e-25 | 1.000000 | 1.15972e-25 | 1.000000 |
| rad56                         | 1.00969e-27 | 1.000000 | 1.00969e-27 | 1.000000 |
| rad68syn                      | 4.04803e-29 | 1.000000 | 4.04803e-29 | 1.000000 |
| rad68anti                     | 3.29762e-29 | 1.000000 | 3.29762e-29 | 1.000000 |
| rad40syn                      | 3.23201e-34 | 1.000000 | 3.23201e-34 | 1.000000 |
| rad40anti                     | 2.54378e-34 | 1.000000 | 2.54378e-34 | 1.000000 |
| rad47                         | 6.77037e-35 | 1.000000 | 6.77037e-35 | 1.000000 |
| rad26                         | 6.58656e-35 | 1.000000 | 6.58656e-35 | 1.000000 |

|           |             |         |             |         |
|-----------|-------------|---------|-------------|---------|
| rad73     | 5.48405e-35 | 1.00000 | 5.48405e-35 | 1.00000 |
| rad28     | 1.62578e-35 | 1.00000 | 1.62578e-35 | 1.00000 |
| rad6      | 3.01687e-36 | 1.00000 | 3.01687e-36 | 1.00000 |
| rad3      | 4.67555e-37 | 1.00000 | 4.67555e-37 | 1.00000 |
| rad2      | 3.77669e-37 | 1.00000 | 3.77669e-37 | 1.00000 |
| rad4      | 2.37226e-37 | 1.00000 | 2.37226e-37 | 1.00000 |
| rad19anti | 7.70499e-38 | 1.00000 | 7.70499e-38 | 1.00000 |
| rad10     | 3.39382e-38 | 1.00000 | 3.39382e-38 | 1.00000 |
| rad14     | 2.67072e-38 | 1.00000 | 2.67072e-38 | 1.00000 |
| rad1      | 2.43345e-38 | 1.00000 | 2.43345e-38 | 1.00000 |
| rad25     | 1.36789e-38 | 1.00000 | 1.36789e-38 | 1.00000 |
| rad27     | 2.89244e-39 | 1.00000 | 2.89244e-39 | 1.00000 |
| rad7      | 2.20637e-40 | 1.00000 | 2.20637e-40 | 1.00000 |
| rad11     | 9.93043e-41 | 1.00000 | 9.93043e-41 | 1.00000 |
| rad9      | 5.41567e-41 | 1.00000 | 5.41567e-41 | 1.00000 |
| rad5      | 3.93397e-42 | 1.00000 | 3.93397e-42 | 1.00000 |
| rad31     | 2.11317e-42 | 1.00000 | 2.11317e-42 | 1.00000 |
| rad13     | 1.23447e-42 | 1.00000 | 1.23447e-42 | 1.00000 |
| rad33     | 1.81039e-43 | 1.00000 | 1.81039e-43 | 1.00000 |
| rad15     | 2.38024e-44 | 1.00000 | 2.38024e-44 | 1.00000 |
| rad20     | 1.52910e-45 | 1.00000 | 1.52910e-45 | 1.00000 |
| rad21     | 1.25856e-45 | 1.00000 | 1.25856e-45 | 1.00000 |
| rad19syn  | 4.31564e-47 | 1.00000 | 4.31564e-47 | 1.00000 |
| rad12     | 3.11989e-47 | 1.00000 | 3.11989e-47 | 1.00000 |
| rad18     | 1.28489e-47 | 1.00000 | 1.28489e-47 | 1.00000 |
| PAH8+H    | 1.08851e-47 | 1.00000 | 1.08851e-47 | 1.00000 |
| rad23     | 1.61453e-49 | 1.00000 | 1.61453e-49 | 1.00000 |
| rad22     | 5.09186e-50 | 1.00000 | 5.09186e-50 | 1.00000 |
| rad71     | 5.50109e-51 | 1.00000 | 5.50109e-51 | 1.00000 |
| rad24     | 4.05117e-51 | 1.00000 | 4.05117e-51 | 1.00000 |
| rad45     | 1.81939e-51 | 1.00000 | 1.81939e-51 | 1.00000 |
| rad36     | 1.11403e-52 | 1.00000 | 1.11403e-52 | 1.00000 |
| rad8      | 2.88050e-68 | 1.00000 | 2.88050e-68 | 1.00000 |

0.100000000E-08 Pa, 120.000000 K

=====

| Rate constant             | True (fraction)        | Effective (fraction)   |
|---------------------------|------------------------|------------------------|
| Total                     | 2.79817e-15 (1.00 )    | 2.79817e-15 (1.00 )    |
| Formation of rad19        | 2.79817e-15 (1.000 )   | 2.79817e-15 (1.000 )   |
| H-abstraction to cyc2enyl | 2.96039e-22 (1.06e-07) | 2.96039e-22 (1.06e-07) |
| H-abstraction to cyclenyl | 1.95323e-28 (6.98e-14) | 1.95323e-28 (6.98e-14) |

| species                       | PYtrue      | Cumul    | PYeffective | Cumul    |
|-------------------------------|-------------|----------|-------------|----------|
| Indene+H                      | 0.999721    | 0.999721 | 0.999721    | 0.999721 |
| PhCHCCH2+H                    | 0.000265418 | 0.999986 | 0.000265418 | 0.999986 |
| PhCCH+CH3                     | 4.66083e-06 | 0.999991 | 4.66083e-06 | 0.999991 |
| C2H2+PhCH2                    | 3.45258e-06 | 0.999994 | 3.45258e-06 | 0.999994 |
| PhCCCH3+H                     | 2.67609e-06 | 0.999997 | 2.67609e-06 | 0.999997 |
| Ph+MeAc                       | 2.08110e-06 | 0.999999 | 2.08110e-06 | 0.999999 |
| rad67                         | 6.22225e-07 | 1.000000 | 6.22225e-07 | 1.000000 |
| rad35                         | 2.72481e-07 | 1.000000 | 2.72481e-07 | 1.000000 |
| Ph+Allene                     | 1.98950e-07 | 1.000000 | 1.98950e-07 | 1.000000 |
| Benzene+cycloprop-2-enylidene | 1.05797e-07 | 1.000000 | 1.05797e-07 | 1.000000 |
| PhCH2CCH+H                    | 2.57407e-08 | 1.000000 | 2.57407e-08 | 1.000000 |
| PAH7+H                        | 2.49248e-08 | 1.000000 | 2.49248e-08 | 1.000000 |
| rad39                         | 7.03420e-09 | 1.000000 | 7.03420e-09 | 1.000000 |
| rad37                         | 6.59774e-09 | 1.000000 | 6.59774e-09 | 1.000000 |
| rad30                         | 5.12566e-09 | 1.000000 | 5.12566e-09 | 1.000000 |
| PAH9+H                        | 3.60882e-10 | 1.000000 | 3.60882e-10 | 1.000000 |
| rad38                         | 1.57196e-10 | 1.000000 | 1.57196e-10 | 1.000000 |
| rad60syn                      | 2.47458e-11 | 1.000000 | 2.47458e-11 | 1.000000 |
| rad60anti                     | 1.21972e-11 | 1.000000 | 1.21972e-11 | 1.000000 |
| PAH10+CH3                     | 1.14592e-11 | 1.000000 | 1.14592e-11 | 1.000000 |
| PAH3+H                        | 1.12460e-11 | 1.000000 | 1.12460e-11 | 1.000000 |
| rad46                         | 9.72362e-12 | 1.000000 | 9.72362e-12 | 1.000000 |
| PhcycC3H3_A+H                 | 2.33055e-12 | 1.000000 | 2.33055e-12 | 1.000000 |
| rad59                         | 2.28645e-12 | 1.000000 | 2.28645e-12 | 1.000000 |
| rad43                         | 4.93137e-13 | 1.000000 | 4.93137e-13 | 1.000000 |
| rad54                         | 4.22356e-13 | 1.000000 | 4.22356e-13 | 1.000000 |
| rad62                         | 1.07952e-13 | 1.000000 | 1.07952e-13 | 1.000000 |
| rad50                         | 7.74736e-14 | 1.000000 | 7.74736e-14 | 1.000000 |
| Benzene+cycloprop-1-enylidene | 6.98038e-14 | 1.000000 | 6.98038e-14 | 1.000000 |
| rad70                         | 8.06832e-15 | 1.000000 | 8.06832e-15 | 1.000000 |
| Phenyl+cycC3H4                | 7.86468e-15 | 1.000000 | 0.000000    | 1.000000 |
| rad55                         | 3.56798e-15 | 1.000000 | 3.56798e-15 | 1.000000 |
| PAH1+H                        | 2.06260e-15 | 1.000000 | 2.06260e-15 | 1.000000 |
| rad52                         | 5.66713e-16 | 1.000000 | 5.66713e-16 | 1.000000 |
| PhcycC3H3_B+H                 | 3.56809e-16 | 1.000000 | 3.56809e-16 | 1.000000 |



|           |             |         |             |         |
|-----------|-------------|---------|-------------|---------|
| rad58     | 2.12355e-16 | 1.00000 | 2.12355e-16 | 1.00000 |
| rad51     | 1.64161e-16 | 1.00000 | 1.64161e-16 | 1.00000 |
| rad34     | 1.10600e-16 | 1.00000 | 1.10600e-16 | 1.00000 |
| rad41     | 1.79639e-17 | 1.00000 | 1.79639e-17 | 1.00000 |
| rad42     | 1.49203e-17 | 1.00000 | 1.49203e-17 | 1.00000 |
| rad65     | 3.52612e-18 | 1.00000 | 3.52612e-18 | 1.00000 |
| rad53     | 5.31328e-21 | 1.00000 | 5.31328e-21 | 1.00000 |
| rad64     | 3.40977e-22 | 1.00000 | 3.40977e-22 | 1.00000 |
| rad61     | 9.89208e-25 | 1.00000 | 9.89208e-25 | 1.00000 |
| rad56     | 1.24744e-26 | 1.00000 | 1.24744e-26 | 1.00000 |
| rad68syn  | 6.17070e-28 | 1.00000 | 6.17070e-28 | 1.00000 |
| rad68anti | 4.99495e-28 | 1.00000 | 4.99495e-28 | 1.00000 |
| rad40syn  | 1.64573e-32 | 1.00000 | 1.64573e-32 | 1.00000 |
| rad40anti | 1.29414e-32 | 1.00000 | 1.29414e-32 | 1.00000 |
| rad73     | 1.92333e-33 | 1.00000 | 1.92333e-33 | 1.00000 |
| rad47     | 6.47610e-35 | 1.00000 | 6.47610e-35 | 1.00000 |
| rad26     | 5.93459e-35 | 1.00000 | 5.93459e-35 | 1.00000 |
| PAH8+H    | 4.13571e-35 | 1.00000 | 4.13571e-35 | 1.00000 |
| rad28     | 1.45526e-35 | 1.00000 | 1.45526e-35 | 1.00000 |
| rad6      | 2.67139e-36 | 1.00000 | 2.67139e-36 | 1.00000 |
| rad2      | 6.78064e-37 | 1.00000 | 6.78064e-37 | 1.00000 |
| rad19anti | 1.46733e-37 | 1.00000 | 1.46733e-37 | 1.00000 |
| rad3      | 1.29877e-37 | 1.00000 | 1.29877e-37 | 1.00000 |
| rad4      | 6.59644e-38 | 1.00000 | 6.59644e-38 | 1.00000 |
| rad1      | 4.38592e-38 | 1.00000 | 4.38592e-38 | 1.00000 |
| rad10     | 3.29615e-38 | 1.00000 | 3.29615e-38 | 1.00000 |
| rad14     | 2.54050e-38 | 1.00000 | 2.54050e-38 | 1.00000 |
| rad25     | 1.32219e-38 | 1.00000 | 1.32219e-38 | 1.00000 |
| rad71     | 1.32207e-38 | 1.00000 | 1.32207e-38 | 1.00000 |
| rad27     | 2.81820e-39 | 1.00000 | 2.81820e-39 | 1.00000 |
| rad7      | 1.95773e-40 | 1.00000 | 1.95773e-40 | 1.00000 |
| rad11     | 9.23916e-41 | 1.00000 | 9.23916e-41 | 1.00000 |
| rad9      | 6.54316e-41 | 1.00000 | 6.54316e-41 | 1.00000 |
| rad5      | 3.63243e-42 | 1.00000 | 3.63243e-42 | 1.00000 |
| rad31     | 3.43446e-42 | 1.00000 | 3.43446e-42 | 1.00000 |
| rad13     | 1.09810e-42 | 1.00000 | 1.09810e-42 | 1.00000 |
| rad33     | 1.90686e-43 | 1.00000 | 1.90686e-43 | 1.00000 |
| rad15     | 2.87562e-44 | 1.00000 | 2.87562e-44 | 1.00000 |
| rad20     | 1.67035e-45 | 1.00000 | 1.67035e-45 | 1.00000 |
| rad21     | 1.38447e-45 | 1.00000 | 1.38447e-45 | 1.00000 |
| rad19syn  | 9.31466e-47 | 1.00000 | 9.31466e-47 | 1.00000 |
| rad12     | 4.13587e-47 | 1.00000 | 4.13587e-47 | 1.00000 |
| rad18     | 1.30442e-47 | 1.00000 | 1.30442e-47 | 1.00000 |
| rad23     | 2.67641e-49 | 1.00000 | 2.67641e-49 | 1.00000 |
| rad22     | 4.95012e-50 | 1.00000 | 4.95012e-50 | 1.00000 |
| rad45     | 1.01198e-50 | 1.00000 | 1.01198e-50 | 1.00000 |
| rad24     | 5.00044e-51 | 1.00000 | 5.00044e-51 | 1.00000 |
| rad36     | 6.20216e-52 | 1.00000 | 6.20216e-52 | 1.00000 |
| rad8      | 4.02249e-68 | 1.00000 | 4.02249e-68 | 1.00000 |

0.100000000E-08 Pa, 130.000000 K

=====

| Rate constant             | True (fraction)        | Effective (fraction)   |
|---------------------------|------------------------|------------------------|
| Total                     | 3.81236e-15 (1.00 )    | 3.81236e-15 (1.00 )    |
| Formation of rad19        | 3.81236e-15 (1.000 )   | 3.81236e-15 (1.000 )   |
| H-abstraction to cyc2enyl | 1.44825e-21 (3.80e-07) | 1.44825e-21 (3.80e-07) |
| H-abstraction to cyclenyl | 2.94348e-27 (7.72e-13) | 2.94348e-27 (7.72e-13) |

| species                       | PYtrue      | Cumul    | PYeffective | Cumul    |
|-------------------------------|-------------|----------|-------------|----------|
| Indene+H                      | 0.999713    | 0.999713 | 0.999713    | 0.999713 |
| PhCHCCH2+H                    | 0.000272881 | 0.999986 | 0.000272881 | 0.999986 |
| PhCCH+CH3                     | 4.80155e-06 | 0.999990 | 4.80155e-06 | 0.999990 |
| C2H2+PhCH2                    | 3.57965e-06 | 0.999994 | 3.57965e-06 | 0.999994 |
| PhCCCH3+H                     | 2.76568e-06 | 0.999997 | 2.76568e-06 | 0.999997 |
| Ph+MeAc                       | 2.16669e-06 | 0.999999 | 2.16669e-06 | 0.999999 |
| rad67                         | 6.46538e-07 | 0.999999 | 6.46538e-07 | 0.999999 |
| Benzene+cycloprop-2-enylidene | 3.79882e-07 | 1.000000 | 3.79882e-07 | 1.000000 |
| rad35                         | 2.82679e-07 | 1.000000 | 2.82679e-07 | 1.000000 |
| Ph+Allene                     | 2.10177e-07 | 1.000000 | 2.10177e-07 | 1.000000 |
| PhCH2CCH+H                    | 2.74426e-08 | 1.000000 | 2.74426e-08 | 1.000000 |
| PAH7+H                        | 2.61181e-08 | 1.000000 | 2.61181e-08 | 1.000000 |
| rad39                         | 7.37119e-09 | 1.000000 | 7.37119e-09 | 1.000000 |
| rad37                         | 6.93326e-09 | 1.000000 | 6.93326e-09 | 1.000000 |
| rad30                         | 5.32333e-09 | 1.000000 | 5.32333e-09 | 1.000000 |
| PAH9+H                        | 3.79203e-10 | 1.000000 | 3.79203e-10 | 1.000000 |
| rad38                         | 1.66034e-10 | 1.000000 | 1.66034e-10 | 1.000000 |
| rad60syn                      | 2.61047e-11 | 1.000000 | 2.61047e-11 | 1.000000 |
| rad60anti                     | 1.28850e-11 | 1.000000 | 1.28850e-11 | 1.000000 |

|                               |             |         |             |         |
|-------------------------------|-------------|---------|-------------|---------|
| PAH10+CH3                     | 1.27171e-11 | 1.00000 | 1.27171e-11 | 1.00000 |
| PAH3+H                        | 1.21014e-11 | 1.00000 | 1.21014e-11 | 1.00000 |
| rad46                         | 1.03119e-11 | 1.00000 | 1.03119e-11 | 1.00000 |
| PhcycC3H3_A+H                 | 2.92361e-12 | 1.00000 | 2.92361e-12 | 1.00000 |
| rad59                         | 2.45281e-12 | 1.00000 | 2.45281e-12 | 1.00000 |
| Benzene+cycloprop-1-enylidene | 7.72089e-13 | 1.00000 | 7.72089e-13 | 1.00000 |
| rad43                         | 5.40149e-13 | 1.00000 | 5.40149e-13 | 1.00000 |
| rad54                         | 4.68163e-13 | 1.00000 | 4.68163e-13 | 1.00000 |
| rad62                         | 1.18546e-13 | 1.00000 | 1.18546e-13 | 1.00000 |
| rad50                         | 8.45270e-14 | 1.00000 | 8.45270e-14 | 1.00000 |
| Phenyl+cycC3H4                | 1.18041e-14 | 1.00000 | 0.00000     | 1.00000 |
| rad70                         | 9.23899e-15 | 1.00000 | 9.23899e-15 | 1.00000 |
| rad55                         | 4.08826e-15 | 1.00000 | 4.08826e-15 | 1.00000 |
| PAH1+H                        | 2.48400e-15 | 1.00000 | 2.48400e-15 | 1.00000 |
| PhcycC3H3_B+H                 | 8.71416e-16 | 1.00000 | 8.71416e-16 | 1.00000 |
| rad52                         | 6.31981e-16 | 1.00000 | 6.31981e-16 | 1.00000 |
| rad58                         | 2.46721e-16 | 1.00000 | 2.46721e-16 | 1.00000 |
| rad51                         | 1.88040e-16 | 1.00000 | 1.88040e-16 | 1.00000 |
| rad34                         | 1.33600e-16 | 1.00000 | 1.33600e-16 | 1.00000 |
| rad41                         | 2.28987e-17 | 1.00000 | 2.28987e-17 | 1.00000 |
| rad42                         | 1.85493e-17 | 1.00000 | 1.85493e-17 | 1.00000 |
| rad65                         | 4.09095e-18 | 1.00000 | 4.09095e-18 | 1.00000 |
| rad53                         | 1.20428e-20 | 1.00000 | 1.20428e-20 | 1.00000 |
| rad64                         | 1.00149e-21 | 1.00000 | 1.00149e-21 | 1.00000 |
| rad61                         | 6.20139e-24 | 1.00000 | 6.20139e-24 | 1.00000 |
| rad56                         | 1.06325e-25 | 1.00000 | 1.06325e-25 | 1.00000 |
| rad68syn                      | 6.24507e-27 | 1.00000 | 6.24507e-27 | 1.00000 |
| rad68anti                     | 5.02761e-27 | 1.00000 | 5.02761e-27 | 1.00000 |
| rad40syn                      | 4.43601e-31 | 1.00000 | 4.43601e-31 | 1.00000 |
| rad40anti                     | 3.49255e-31 | 1.00000 | 3.49255e-31 | 1.00000 |
| rad73                         | 3.97404e-32 | 1.00000 | 3.97404e-32 | 1.00000 |
| PAH8+H                        | 2.25812e-33 | 1.00000 | 2.25812e-33 | 1.00000 |
| rad47                         | 6.28095e-35 | 1.00000 | 6.28095e-35 | 1.00000 |
| rad26                         | 5.39660e-35 | 1.00000 | 5.39660e-35 | 1.00000 |
| rad28                         | 1.31434e-35 | 1.00000 | 1.31434e-35 | 1.00000 |
| rad2                          | 5.19432e-36 | 1.00000 | 5.19432e-36 | 1.00000 |
| rad6                          | 2.40089e-36 | 1.00000 | 2.40089e-36 | 1.00000 |
| rad71                         | 1.12266e-36 | 1.00000 | 1.12266e-36 | 1.00000 |
| rad3                          | 7.76061e-37 | 1.00000 | 7.76061e-37 | 1.00000 |
| rad4                          | 3.94577e-37 | 1.00000 | 3.94577e-37 | 1.00000 |
| rad1                          | 3.37399e-37 | 1.00000 | 3.37399e-37 | 1.00000 |
| rad19anti                     | 2.96678e-37 | 1.00000 | 2.96678e-37 | 1.00000 |
| rad10                         | 1.50785e-37 | 1.00000 | 1.50785e-37 | 1.00000 |
| rad14                         | 2.44524e-38 | 1.00000 | 2.44524e-38 | 1.00000 |
| rad25                         | 1.29372e-38 | 1.00000 | 1.29372e-38 | 1.00000 |
| rad27                         | 2.78105e-39 | 1.00000 | 2.78105e-39 | 1.00000 |
| rad7                          | 1.76327e-40 | 1.00000 | 1.76327e-40 | 1.00000 |
| rad11                         | 8.73565e-41 | 1.00000 | 8.73565e-41 | 1.00000 |
| rad9                          | 8.09866e-41 | 1.00000 | 8.09866e-41 | 1.00000 |
| rad31                         | 5.85925e-42 | 1.00000 | 5.85925e-42 | 1.00000 |
| rad5                          | 3.38644e-42 | 1.00000 | 3.38644e-42 | 1.00000 |
| rad13                         | 9.91846e-43 | 1.00000 | 9.91846e-43 | 1.00000 |
| rad33                         | 2.04173e-43 | 1.00000 | 2.04173e-43 | 1.00000 |
| rad15                         | 3.55987e-44 | 1.00000 | 3.55987e-44 | 1.00000 |
| rad20                         | 1.85688e-45 | 1.00000 | 1.85688e-45 | 1.00000 |
| rad21                         | 1.55054e-45 | 1.00000 | 1.55054e-45 | 1.00000 |
| rad19syn                      | 2.10397e-46 | 1.00000 | 2.10397e-46 | 1.00000 |
| rad12                         | 5.64234e-47 | 1.00000 | 5.64234e-47 | 1.00000 |
| rad18                         | 1.34195e-47 | 1.00000 | 1.34195e-47 | 1.00000 |
| rad23                         | 4.88845e-49 | 1.00000 | 4.88845e-49 | 1.00000 |
| rad22                         | 4.86574e-50 | 1.00000 | 4.86574e-50 | 1.00000 |
| rad24                         | 6.32080e-51 | 1.00000 | 6.32080e-51 | 1.00000 |
| rad45                         | 5.41956e-51 | 1.00000 | 5.41956e-51 | 1.00000 |
| rad36                         | 3.32310e-52 | 1.00000 | 3.32310e-52 | 1.00000 |
| rad8                          | 5.76906e-68 | 1.00000 | 5.76906e-68 | 1.00000 |

0.100000000E-08 Pa, 140.000000 K

| Rate constant             | True (fraction)        | Effective (fraction)   |             |          |
|---------------------------|------------------------|------------------------|-------------|----------|
| Total                     | 4.99515e-15 (1.00 )    | 4.99515e-15 (1.00 )    |             |          |
| Formation of rad19        | 4.99514e-15 (1.000 )   | 4.99514e-15 (1.000 )   |             |          |
| H-abstraction to cyc2enyl | 5.62488e-21 (1.13e-06) | 5.62488e-21 (1.13e-06) |             |          |
| H-abstraction to cyclenyl | 3.00047e-26 (6.01e-12) | 3.00047e-26 (6.01e-12) |             |          |
| species                   | PYtrue                 | Cumul                  | PYeffective | Cumul    |
| Indene+H                  | 0.999703               | 0.999703               | 0.999703    | 0.999703 |
| PhCHCCH2+H                | 0.000280917            | 0.999984               | 0.000280917 | 0.999984 |
| PhCCH+CH3                 | 4.95294e-06            | 0.999989               | 4.95294e-06 | 0.999989 |

|                               |             |          |             |          |
|-------------------------------|-------------|----------|-------------|----------|
| C2H2+PhCH2                    | 3.71777e-06 | 0.999992 | 3.71777e-06 | 0.999992 |
| PhCCCH3+H                     | 2.86259e-06 | 0.999995 | 2.86259e-06 | 0.999995 |
| Ph+MeAc                       | 2.26007e-06 | 0.999998 | 2.26007e-06 | 0.999998 |
| Benzene+cycloprop-2-enylidene | 1.12607e-06 | 0.999999 | 1.12607e-06 | 0.999999 |
| rad67                         | 6.73023e-07 | 0.999999 | 6.73023e-07 | 0.999999 |
| rad35                         | 2.93770e-07 | 1.000000 | 2.93770e-07 | 1.000000 |
| Ph+Allene                     | 2.22660e-07 | 1.000000 | 2.22660e-07 | 1.000000 |
| PhCH2CCH+H                    | 2.93552e-08 | 1.000000 | 2.93552e-08 | 1.000000 |
| PAH7+H                        | 2.74321e-08 | 1.000000 | 2.74321e-08 | 1.000000 |
| rad39                         | 7.74205e-09 | 1.000000 | 7.74205e-09 | 1.000000 |
| rad37                         | 7.30375e-09 | 1.000000 | 7.30375e-09 | 1.000000 |
| rad30                         | 5.53888e-09 | 1.000000 | 5.53888e-09 | 1.000000 |
| PAH9+H                        | 3.99479e-10 | 1.000000 | 3.99479e-10 | 1.000000 |
| rad38                         | 1.75886e-10 | 1.000000 | 1.75886e-10 | 1.000000 |
| rad60syn                      | 2.76144e-11 | 1.000000 | 2.76144e-11 | 1.000000 |
| PAH10+CH3                     | 1.41941e-11 | 1.000000 | 1.41941e-11 | 1.000000 |
| rad60anti                     | 1.36504e-11 | 1.000000 | 1.36504e-11 | 1.000000 |
| PAH3+H                        | 1.30742e-11 | 1.000000 | 1.30742e-11 | 1.000000 |
| rad46                         | 1.09703e-11 | 1.000000 | 1.09703e-11 | 1.000000 |
| Benzene+cycloprop-1-enylidene | 6.00677e-12 | 1.000000 | 6.00677e-12 | 1.000000 |
| PhcycC3H3_A+H                 | 3.69543e-12 | 1.000000 | 3.69543e-12 | 1.000000 |
| rad59                         | 2.64125e-12 | 1.000000 | 2.64125e-12 | 1.000000 |
| rad43                         | 5.94445e-13 | 1.000000 | 5.94445e-13 | 1.000000 |
| rad54                         | 5.21921e-13 | 1.000000 | 5.21921e-13 | 1.000000 |
| rad62                         | 1.30794e-13 | 1.000000 | 1.30794e-13 | 1.000000 |
| rad50                         | 9.26897e-14 | 1.000000 | 9.26897e-14 | 1.000000 |
| Phenyl+cycC3H4                | 1.75978e-14 | 1.000000 | 0.000000    | 1.000000 |
| rad70                         | 1.06600e-14 | 1.000000 | 1.06600e-14 | 1.000000 |
| rad55                         | 4.71987e-15 | 1.000000 | 4.71987e-15 | 1.000000 |
| PAH1+H                        | 3.02080e-15 | 1.000000 | 3.02080e-15 | 1.000000 |
| PhcycC3H3_B+H                 | 1.95210e-15 | 1.000000 | 1.95210e-15 | 1.000000 |
| rad52                         | 7.09403e-16 | 1.000000 | 7.09403e-16 | 1.000000 |
| rad58                         | 2.89095e-16 | 1.000000 | 2.89095e-16 | 1.000000 |
| rad51                         | 2.17208e-16 | 1.000000 | 2.17208e-16 | 1.000000 |
| rad34                         | 1.62990e-16 | 1.000000 | 1.62990e-16 | 1.000000 |
| rad41                         | 2.94364e-17 | 1.000000 | 2.94364e-17 | 1.000000 |
| rad42                         | 2.32499e-17 | 1.000000 | 2.32499e-17 | 1.000000 |
| rad65                         | 4.78938e-18 | 1.000000 | 4.78938e-18 | 1.000000 |
| rad53                         | 2.52919e-20 | 1.000000 | 2.52919e-20 | 1.000000 |
| rad64                         | 2.62060e-21 | 1.000000 | 2.62060e-21 | 1.000000 |
| rad61                         | 3.06689e-23 | 1.000000 | 3.06689e-23 | 1.000000 |
| rad56                         | 6.80095e-25 | 1.000000 | 6.80095e-25 | 1.000000 |
| rad68syn                      | 4.60298e-26 | 1.000000 | 4.60298e-26 | 1.000000 |
| rad68anti                     | 3.68680e-26 | 1.000000 | 3.68680e-26 | 1.000000 |
| rad40syn                      | 7.53654e-30 | 1.000000 | 7.53654e-30 | 1.000000 |
| rad40anti                     | 5.95184e-30 | 1.000000 | 5.95184e-30 | 1.000000 |
| rad73                         | 5.47778e-31 | 1.000000 | 5.47778e-31 | 1.000000 |
| PAH8+H                        | 6.68141e-32 | 1.000000 | 6.68141e-32 | 1.000000 |
| rad47                         | 6.17129e-35 | 1.000000 | 6.17129e-35 | 1.000000 |
| rad26                         | 4.94516e-35 | 1.000000 | 4.94516e-35 | 1.000000 |
| rad71                         | 4.16930e-35 | 1.000000 | 4.16930e-35 | 1.000000 |
| rad2                          | 1.68928e-35 | 1.000000 | 1.68928e-35 | 1.000000 |
| rad28                         | 1.19590e-35 | 1.000000 | 1.19590e-35 | 1.000000 |
| rad6                          | 2.18479e-36 | 1.000000 | 2.18479e-36 | 1.000000 |
| rad1                          | 1.10261e-36 | 1.000000 | 1.10261e-36 | 1.000000 |
| rad19anti                     | 6.35581e-37 | 1.000000 | 6.35581e-37 | 1.000000 |
| rad3                          | 3.73914e-37 | 1.000000 | 3.73914e-37 | 1.000000 |
| rad4                          | 1.90364e-37 | 1.000000 | 1.90364e-37 | 1.000000 |
| rad10                         | 1.53320e-37 | 1.000000 | 1.53320e-37 | 1.000000 |
| rad14                         | 2.37776e-38 | 1.000000 | 2.37776e-38 | 1.000000 |
| rad25                         | 1.27944e-38 | 1.000000 | 1.27944e-38 | 1.000000 |
| rad27                         | 2.77524e-39 | 1.000000 | 2.77524e-39 | 1.000000 |
| rad7                          | 1.60816e-40 | 1.000000 | 1.60816e-40 | 1.000000 |
| rad9                          | 1.02519e-40 | 1.000000 | 1.02519e-40 | 1.000000 |
| rad11                         | 8.37526e-41 | 1.000000 | 8.37526e-41 | 1.000000 |
| rad31                         | 1.04782e-41 | 1.000000 | 1.04782e-41 | 1.000000 |
| rad5                          | 3.18238e-42 | 1.000000 | 3.18238e-42 | 1.000000 |
| rad13                         | 9.07543e-43 | 1.000000 | 9.07543e-43 | 1.000000 |
| rad33                         | 2.21868e-43 | 1.000000 | 2.21868e-43 | 1.000000 |
| rad15                         | 4.50817e-44 | 1.000000 | 4.50817e-44 | 1.000000 |
| rad20                         | 2.09725e-45 | 1.000000 | 2.09725e-45 | 1.000000 |
| rad21                         | 1.76508e-45 | 1.000000 | 1.76508e-45 | 1.000000 |
| rad19syn                      | 4.98180e-46 | 1.000000 | 4.98180e-46 | 1.000000 |
| rad12                         | 7.90912e-47 | 1.000000 | 7.90912e-47 | 1.000000 |
| rad18                         | 1.39664e-47 | 1.000000 | 1.39664e-47 | 1.000000 |
| rad23                         | 9.65861e-49 | 1.000000 | 9.65861e-49 | 1.000000 |
| rad45                         | 1.13189e-49 | 1.000000 | 1.13189e-49 | 1.000000 |
| rad22                         | 4.82775e-50 | 1.000000 | 4.82775e-50 | 1.000000 |
| rad24                         | 8.16913e-51 | 1.000000 | 8.16913e-51 | 1.000000 |
| rad36                         | 6.94926e-51 | 1.000000 | 6.94926e-51 | 1.000000 |

rad8 | 8.48093e-68 1.000000 | 8.48093e-68 1.000000

0.100000000E-08 Pa, 150.000000 K

=====  
Rate constant | True (fraction) | Effective (fraction)  
-----  
Total | 6.34137e-15 (1.00 ) | 6.34137e-15 (1.00 )  
Formation of rad19 | 6.34135e-15 (1.000 ) | 6.34135e-15 (1.000 )  
H-abstraction to cyc2enyl | 1.81685e-20 (2.87e-06) | 1.81685e-20 (2.87e-06)  
H-abstraction to cyc1enyl | 2.23765e-25 (3.53e-11) | 2.23765e-25 (3.53e-11)

| species                       | PYtrue      | Cumul    | PYeffective | Cumul    |
|-------------------------------|-------------|----------|-------------|----------|
| Indene+H                      | 0.999692    | 0.999692 | 0.999692    | 0.999692 |
| PhCHCCH2+H                    | 0.000289592 | 0.999982 | 0.000289592 | 0.999982 |
| PhCCH+CH3                     | 5.11623e-06 | 0.999987 | 5.11623e-06 | 0.999987 |
| C2H2+PhCH2                    | 3.86834e-06 | 0.999991 | 3.86834e-06 | 0.999991 |
| PhCCCH3+H                     | 2.96768e-06 | 0.999994 | 2.96768e-06 | 0.999994 |
| Benzene+cycloprop-2-enylidene | 2.86508e-06 | 0.999997 | 2.86508e-06 | 0.999997 |
| Ph+MeAc                       | 2.36224e-06 | 0.999999 | 2.36224e-06 | 0.999999 |
| rad67                         | 7.01968e-07 | 1.000000 | 7.01968e-07 | 1.000000 |
| rad35                         | 3.05869e-07 | 1.000000 | 3.05869e-07 | 1.000000 |
| Ph+Allene                     | 2.36598e-07 | 1.000000 | 2.36598e-07 | 1.000000 |
| PhCH2CCH+H                    | 3.15146e-08 | 1.000000 | 3.15146e-08 | 1.000000 |
| PAH7+H                        | 2.88839e-08 | 1.000000 | 2.88839e-08 | 1.000000 |
| rad39                         | 8.15167e-09 | 1.000000 | 8.15167e-09 | 1.000000 |
| rad37                         | 7.71444e-09 | 1.000000 | 7.71444e-09 | 1.000000 |
| rad30                         | 5.77470e-09 | 1.000000 | 5.77470e-09 | 1.000000 |
| PAH9+H                        | 4.22009e-10 | 1.000000 | 4.22009e-10 | 1.000000 |
| rad38                         | 1.86919e-10 | 1.000000 | 1.86919e-10 | 1.000000 |
| Benzene+cycloprop-1-enylidene | 3.52865e-11 | 1.000000 | 3.52865e-11 | 1.000000 |
| rad60syn                      | 2.92988e-11 | 1.000000 | 2.92988e-11 | 1.000000 |
| PAH10+CH3                     | 1.59406e-11 | 1.000000 | 1.59406e-11 | 1.000000 |
| rad60anti                     | 1.45059e-11 | 1.000000 | 1.45059e-11 | 1.000000 |
| PAH3+H                        | 1.41866e-11 | 1.000000 | 1.41866e-11 | 1.000000 |
| rad46                         | 1.17105e-11 | 1.000000 | 1.17105e-11 | 1.000000 |
| PhcycC3H3_A+H                 | 4.70694e-12 | 1.000000 | 4.70694e-12 | 1.000000 |
| rad59                         | 2.85583e-12 | 1.000000 | 2.85583e-12 | 1.000000 |
| rad43                         | 6.57518e-13 | 1.000000 | 6.57518e-13 | 1.000000 |
| rad54                         | 5.85445e-13 | 1.000000 | 5.85445e-13 | 1.000000 |
| rad62                         | 1.45031e-13 | 1.000000 | 1.45031e-13 | 1.000000 |
| rad50                         | 1.02199e-13 | 1.000000 | 1.02199e-13 | 1.000000 |
| Phenyl+cycC3H4                | 2.61242e-14 | 1.000000 | 0.000000    | 1.000000 |
| rad70                         | 1.23994e-14 | 1.000000 | 1.23994e-14 | 1.000000 |
| rad55                         | 5.49294e-15 | 1.000000 | 5.49294e-15 | 1.000000 |
| PhcycC3H3_B+H                 | 4.08980e-15 | 1.000000 | 4.08980e-15 | 1.000000 |
| PAH1+H                        | 3.71111e-15 | 1.000000 | 3.71111e-15 | 1.000000 |
| rad52                         | 8.01987e-16 | 1.000000 | 8.01987e-16 | 1.000000 |
| rad58                         | 3.41821e-16 | 1.000000 | 3.41821e-16 | 1.000000 |
| rad51                         | 2.53178e-16 | 1.000000 | 2.53178e-16 | 1.000000 |
| rad34                         | 2.00908e-16 | 1.000000 | 2.00908e-16 | 1.000000 |
| rad41                         | 3.81683e-17 | 1.000000 | 3.81683e-17 | 1.000000 |
| rad42                         | 2.93833e-17 | 1.000000 | 2.93833e-17 | 1.000000 |
| rad65                         | 5.66165e-18 | 1.000000 | 5.66165e-18 | 1.000000 |
| rad53                         | 5.02100e-20 | 1.000000 | 5.02100e-20 | 1.000000 |
| rad64                         | 6.27506e-21 | 1.000000 | 6.27506e-21 | 1.000000 |
| rad61                         | 1.25963e-22 | 1.000000 | 1.25963e-22 | 1.000000 |
| rad56                         | 3.47179e-24 | 1.000000 | 3.47179e-24 | 1.000000 |
| rad68syn                      | 2.64356e-25 | 1.000000 | 2.64356e-25 | 1.000000 |
| rad68anti                     | 2.10658e-25 | 1.000000 | 2.10658e-25 | 1.000000 |
| rad40syn                      | 8.88016e-29 | 1.000000 | 8.88016e-29 | 1.000000 |
| rad40anti                     | 7.03998e-29 | 1.000000 | 7.03998e-29 | 1.000000 |
| rad73                         | 5.47735e-30 | 1.000000 | 5.47735e-30 | 1.000000 |
| PAH8+H                        | 1.26388e-30 | 1.000000 | 1.26388e-30 | 1.000000 |
| rad71                         | 9.41848e-34 | 1.000000 | 9.41848e-34 | 1.000000 |
| rad47                         | 6.13964e-35 | 1.000000 | 6.13964e-35 | 1.000000 |
| rad26                         | 4.56081e-35 | 1.000000 | 4.56081e-35 | 1.000000 |
| rad28                         | 1.09488e-35 | 1.000000 | 1.09488e-35 | 1.000000 |
| rad2                          | 7.85279e-36 | 1.000000 | 7.85279e-36 | 1.000000 |
| rad6                          | 2.01257e-36 | 1.000000 | 2.01257e-36 | 1.000000 |
| rad19anti                     | 1.44031e-36 | 1.000000 | 1.44031e-36 | 1.000000 |
| rad1                          | 5.15143e-37 | 1.000000 | 5.15143e-37 | 1.000000 |
| rad3                          | 1.77717e-37 | 1.000000 | 1.77717e-37 | 1.000000 |
| rad10                         | 1.72044e-37 | 1.000000 | 1.72044e-37 | 1.000000 |
| rad4                          | 9.05944e-38 | 1.000000 | 9.05944e-38 | 1.000000 |
| rad14                         | 2.33310e-38 | 1.000000 | 2.33310e-38 | 1.000000 |
| rad25                         | 1.27736e-38 | 1.000000 | 1.27736e-38 | 1.000000 |
| rad27                         | 2.79716e-39 | 1.000000 | 2.79716e-39 | 1.000000 |
| rad7                          | 1.48485e-40 | 1.000000 | 1.48485e-40 | 1.000000 |
| rad9                          | 1.32572e-40 | 1.000000 | 1.32572e-40 | 1.000000 |

|          |             |         |             |         |
|----------|-------------|---------|-------------|---------|
| rad11    | 8.13441e-41 | 1.00000 | 8.13441e-41 | 1.00000 |
| rad31    | 1.96252e-41 | 1.00000 | 1.96252e-41 | 1.00000 |
| rad5     | 3.01062e-42 | 1.00000 | 3.01062e-42 | 1.00000 |
| rad13    | 8.41080e-43 | 1.00000 | 8.41080e-43 | 1.00000 |
| rad33    | 2.44380e-43 | 1.00000 | 2.44380e-43 | 1.00000 |
| rad15    | 5.83331e-44 | 1.00000 | 5.83331e-44 | 1.00000 |
| rad20    | 2.40367e-45 | 1.00000 | 2.40367e-45 | 1.00000 |
| rad21    | 2.03985e-45 | 1.00000 | 2.03985e-45 | 1.00000 |
| rad19syn | 1.23836e-45 | 1.00000 | 1.23836e-45 | 1.00000 |
| rad12    | 1.13793e-46 | 1.00000 | 1.13793e-46 | 1.00000 |
| rad18    | 1.46855e-47 | 1.00000 | 1.46855e-47 | 1.00000 |
| rad23    | 2.04873e-48 | 1.00000 | 2.04873e-48 | 1.00000 |
| rad45    | 1.19862e-49 | 1.00000 | 1.19862e-49 | 1.00000 |
| rad22    | 4.82867e-50 | 1.00000 | 4.82867e-50 | 1.00000 |
| rad24    | 1.07828e-50 | 1.00000 | 1.07828e-50 | 1.00000 |
| rad36    | 7.36557e-51 | 1.00000 | 7.36557e-51 | 1.00000 |
| rad8     | 1.27613e-67 | 1.00000 | 1.27613e-67 | 1.00000 |

0.100000000E-08 Pa, 160.000000 K

| Rate constant             | True (fraction)        | Effective (fraction)   |
|---------------------------|------------------------|------------------------|
| Total                     | 7.84423e-15 (1.00 )    | 7.84423e-15 (1.00 )    |
| Formation of rad19        | 7.84418e-15 (1.000 )   | 7.84418e-15 (1.000 )   |
| H-abstraction to cyc2enyl | 5.05321e-20 (6.44e-06) | 5.05321e-20 (6.44e-06) |
| H-abstraction to cyclenyl | 1.29479e-24 (1.65e-10) | 1.29479e-24 (1.65e-10) |

| species                       | PYtrue      | Cumul    | PYeffective | Cumul    |
|-------------------------------|-------------|----------|-------------|----------|
| Indene+H                      | 0.999679    | 0.999679 | 0.999679    | 0.999679 |
| PhCHCCH2+H                    | 0.000298982 | 0.999978 | 0.000298982 | 0.999978 |
| Benzene+cycloprop-2-enylidene | 6.44194e-06 | 0.999984 | 6.44194e-06 | 0.999984 |
| PhCCH+CH3                     | 5.29275e-06 | 0.999989 | 5.29275e-06 | 0.999989 |
| C2H2+PhCH2                    | 4.03297e-06 | 0.999993 | 4.03297e-06 | 0.999993 |
| PhCCCH3+H                     | 3.08198e-06 | 0.999996 | 3.08198e-06 | 0.999996 |
| Ph+MeAc                       | 2.47440e-06 | 0.999999 | 2.47440e-06 | 0.999999 |
| rad67                         | 7.33696e-07 | 1.000000 | 7.33696e-07 | 1.000000 |
| rad35                         | 3.19106e-07 | 1.000000 | 3.19106e-07 | 1.000000 |
| Ph+Allene                     | 2.52226e-07 | 1.000000 | 2.52226e-07 | 1.000000 |
| PhCH2CCH+H                    | 3.39643e-08 | 1.000000 | 3.39643e-08 | 1.000000 |
| PAH7+H                        | 3.04941e-08 | 1.000000 | 3.04941e-08 | 1.000000 |
| rad39                         | 8.60568e-09 | 1.000000 | 8.60568e-09 | 1.000000 |
| rad37                         | 8.17136e-09 | 1.000000 | 8.17136e-09 | 1.000000 |
| rad30                         | 6.03351e-09 | 1.000000 | 6.03351e-09 | 1.000000 |
| PAH9+H                        | 4.47144e-10 | 1.000000 | 4.47144e-10 | 1.000000 |
| rad38                         | 1.99330e-10 | 1.000000 | 1.99330e-10 | 1.000000 |
| Benzene+cycloprop-1-enylidene | 1.65062e-10 | 1.000000 | 1.65062e-10 | 1.000000 |
| rad60syn                      | 3.11859e-11 | 1.000000 | 3.11859e-11 | 1.000000 |
| PAH10+CH3                     | 1.80192e-11 | 1.000000 | 1.80192e-11 | 1.000000 |
| rad60anti                     | 1.54660e-11 | 1.000000 | 1.54660e-11 | 1.000000 |
| PAH3+H                        | 1.54653e-11 | 1.000000 | 1.54653e-11 | 1.000000 |
| rad46                         | 1.25466e-11 | 1.000000 | 1.25466e-11 | 1.000000 |
| PhcycC3H3_A+H                 | 6.04093e-12 | 1.000000 | 6.04093e-12 | 1.000000 |
| rad59                         | 3.10145e-12 | 1.000000 | 3.10145e-12 | 1.000000 |
| rad43                         | 7.31202e-13 | 1.000000 | 7.31202e-13 | 1.000000 |
| rad54                         | 6.61022e-13 | 1.000000 | 6.61022e-13 | 1.000000 |
| rad62                         | 1.61671e-13 | 1.000000 | 1.61671e-13 | 1.000000 |
| rad50                         | 1.13351e-13 | 1.000000 | 1.13351e-13 | 1.000000 |
| Phenyl+cycC3H4                | 3.86829e-14 | 1.000000 | 0.000000    | 1.000000 |
| rad70                         | 1.45456e-14 | 1.000000 | 1.45456e-14 | 1.000000 |
| PhcycC3H3_B+H                 | 8.12740e-15 | 1.000000 | 8.12740e-15 | 1.000000 |
| rad55                         | 6.44670e-15 | 1.000000 | 6.44670e-15 | 1.000000 |
| PAH1+H                        | 4.60690e-15 | 1.000000 | 4.60690e-15 | 1.000000 |
| rad52                         | 9.13581e-16 | 1.000000 | 9.13581e-16 | 1.000000 |
| rad58                         | 4.08006e-16 | 1.000000 | 4.08006e-16 | 1.000000 |
| rad51                         | 2.97957e-16 | 1.000000 | 2.97957e-16 | 1.000000 |
| rad34                         | 2.50279e-16 | 1.000000 | 2.50279e-16 | 1.000000 |
| rad41                         | 4.99159e-17 | 1.000000 | 4.99159e-17 | 1.000000 |
| rad42                         | 3.74399e-17 | 1.000000 | 3.74399e-17 | 1.000000 |
| rad65                         | 6.76165e-18 | 1.000000 | 6.76165e-18 | 1.000000 |
| rad53                         | 9.55514e-20 | 1.000000 | 9.55514e-20 | 1.000000 |
| rad64                         | 1.40204e-20 | 1.000000 | 1.40204e-20 | 1.000000 |
| rad61                         | 4.46330e-22 | 1.000000 | 4.46330e-22 | 1.000000 |
| rad56                         | 1.48090e-23 | 1.000000 | 1.48090e-23 | 1.000000 |
| rad68syn                      | 1.24419e-24 | 1.000000 | 1.24419e-24 | 1.000000 |
| rad68anti                     | 9.86157e-25 | 1.000000 | 9.86157e-25 | 1.000000 |
| rad40syn                      | 7.79816e-28 | 1.000000 | 7.79816e-28 | 1.000000 |
| rad40anti                     | 6.20621e-28 | 1.000000 | 6.20621e-28 | 1.000000 |
| rad73                         | 4.23082e-29 | 1.000000 | 4.23082e-29 | 1.000000 |
| PAH8+H                        | 1.68146e-29 | 1.000000 | 1.68146e-29 | 1.000000 |

|           |             |         |             |         |
|-----------|-------------|---------|-------------|---------|
| rad71     | 1.46142e-32 | 1.00000 | 1.46142e-32 | 1.00000 |
| rad47     | 6.18322e-35 | 1.00000 | 6.18322e-35 | 1.00000 |
| rad26     | 4.22934e-35 | 1.00000 | 4.22934e-35 | 1.00000 |
| rad28     | 1.00759e-35 | 1.00000 | 1.00759e-35 | 1.00000 |
| rad19anti | 3.44720e-36 | 1.00000 | 3.44720e-36 | 1.00000 |
| rad2      | 2.31926e-36 | 1.00000 | 2.31926e-36 | 1.00000 |
| rad6      | 1.87943e-36 | 1.00000 | 1.87943e-36 | 1.00000 |
| rad10     | 2.09800e-37 | 1.00000 | 2.09800e-37 | 1.00000 |
| rad1      | 1.52929e-37 | 1.00000 | 1.52929e-37 | 1.00000 |
| rad3      | 6.49947e-38 | 1.00000 | 6.49947e-38 | 1.00000 |
| rad4      | 3.31724e-38 | 1.00000 | 3.31724e-38 | 1.00000 |
| rad14     | 2.30783e-38 | 1.00000 | 2.30783e-38 | 1.00000 |
| rad25     | 1.28621e-38 | 1.00000 | 1.28621e-38 | 1.00000 |
| rad27     | 2.84480e-39 | 1.00000 | 2.84480e-39 | 1.00000 |
| rad9      | 1.74980e-40 | 1.00000 | 1.74980e-40 | 1.00000 |
| rad7      | 1.38994e-40 | 1.00000 | 1.38994e-40 | 1.00000 |
| rad11     | 8.00171e-41 | 1.00000 | 8.00171e-41 | 1.00000 |
| rad31     | 3.84757e-41 | 1.00000 | 3.84757e-41 | 1.00000 |
| rad5      | 2.86420e-42 | 1.00000 | 2.86420e-42 | 1.00000 |
| rad13     | 7.90644e-43 | 1.00000 | 7.90644e-43 | 1.00000 |
| rad33     | 2.72585e-43 | 1.00000 | 2.72585e-43 | 1.00000 |
| rad15     | 7.70575e-44 | 1.00000 | 7.70575e-44 | 1.00000 |
| rad19syn  | 3.23538e-45 | 1.00000 | 3.23538e-45 | 1.00000 |
| rad20     | 2.79293e-45 | 1.00000 | 2.79293e-45 | 1.00000 |
| rad21     | 2.39112e-45 | 1.00000 | 2.39112e-45 | 1.00000 |
| rad12     | 1.67927e-46 | 1.00000 | 1.67927e-46 | 1.00000 |
| rad18     | 1.55844e-47 | 1.00000 | 1.55844e-47 | 1.00000 |
| rad23     | 4.75036e-48 | 1.00000 | 4.75036e-48 | 1.00000 |
| rad45     | 7.32325e-50 | 1.00000 | 7.32325e-50 | 1.00000 |
| rad22     | 4.86333e-50 | 1.00000 | 4.86333e-50 | 1.00000 |
| rad24     | 1.45244e-50 | 1.00000 | 1.45244e-50 | 1.00000 |
| rad36     | 4.50716e-51 | 1.00000 | 4.50716e-51 | 1.00000 |
| rad8      | 1.96346e-67 | 1.00000 | 1.96346e-67 | 1.00000 |

0.100000000E-08 Pa, 170.000000 K

=====

| Rate constant             | True (fraction)        | Effective (fraction)   |
|---------------------------|------------------------|------------------------|
| Total                     | 9.49598e-15 (1.00 )    | 9.49598e-15 (1.00 )    |
| Formation of rad19        | 9.49586e-15 (1.000 )   | 9.49586e-15 (1.000 )   |
| H-abstraction to cyc2enyl | 1.24279e-19 (1.31e-05) | 1.24279e-19 (1.31e-05) |
| H-abstraction to cyclenyl | 6.08025e-24 (6.40e-10) | 6.08025e-24 (6.40e-10) |

| species                       | PYtrue      | Cumul    | PYeffective | Cumul    |
|-------------------------------|-------------|----------|-------------|----------|
| Indene+H                      | 0.999661    | 0.999661 | 0.999661    | 0.999661 |
| PhCHCCH2+H                    | 0.000309167 | 0.999970 | 0.000309167 | 0.999970 |
| Benzene+cycloprop-2-enylidene | 1.30875e-05 | 0.999983 | 1.30875e-05 | 0.999983 |
| PhCCH+CH3                     | 5.48398e-06 | 0.999989 | 5.48398e-06 | 0.999989 |
| C2H2+PhCH2                    | 4.21347e-06 | 0.999993 | 4.21347e-06 | 0.999993 |
| PhCCCH3+H                     | 3.20659e-06 | 0.999996 | 3.20659e-06 | 0.999996 |
| Ph+MeAc                       | 2.59788e-06 | 0.999999 | 2.59788e-06 | 0.999999 |
| rad67                         | 7.68575e-07 | 0.999999 | 7.68575e-07 | 0.999999 |
| rad35                         | 3.33631e-07 | 1.000000 | 3.33631e-07 | 1.000000 |
| Ph+Allene                     | 2.69815e-07 | 1.000000 | 2.69815e-07 | 1.000000 |
| PhCH2CCH+H                    | 3.67554e-08 | 1.000000 | 3.67554e-08 | 1.000000 |
| PAH7+H                        | 3.22859e-08 | 1.000000 | 3.22859e-08 | 1.000000 |
| rad39                         | 9.11054e-09 | 1.000000 | 9.11054e-09 | 1.000000 |
| rad37                         | 8.68151e-09 | 1.000000 | 8.68151e-09 | 1.000000 |
| rad30                         | 6.31840e-09 | 1.000000 | 6.31840e-09 | 1.000000 |
| Benzene+cycloprop-1-enylidene | 6.40297e-10 | 1.000000 | 6.40297e-10 | 1.000000 |
| PAH9+H                        | 4.75294e-10 | 1.000000 | 4.75294e-10 | 1.000000 |
| rad38                         | 2.13351e-10 | 1.000000 | 2.13351e-10 | 1.000000 |
| rad60syn                      | 3.33085e-11 | 1.000000 | 3.33085e-11 | 1.000000 |
| PAH10+CH3                     | 2.05094e-11 | 1.000000 | 2.05094e-11 | 1.000000 |
| PAH3+H                        | 1.69431e-11 | 1.000000 | 1.69431e-11 | 1.000000 |
| rad60anti                     | 1.65480e-11 | 1.000000 | 1.65480e-11 | 1.000000 |
| rad46                         | 1.34952e-11 | 1.000000 | 1.34952e-11 | 1.000000 |
| PhcycC3H3_A+H                 | 7.80973e-12 | 1.000000 | 7.80973e-12 | 1.000000 |
| rad59                         | 3.38400e-12 | 1.000000 | 3.38400e-12 | 1.000000 |
| rad43                         | 8.17741e-13 | 1.000000 | 8.17741e-13 | 1.000000 |
| rad54                         | 7.51515e-13 | 1.000000 | 7.51515e-13 | 1.000000 |
| rad62                         | 1.81221e-13 | 1.000000 | 1.81221e-13 | 1.000000 |
| rad50                         | 1.26512e-13 | 1.000000 | 1.26512e-13 | 1.000000 |
| Phenyl+cycC3H4                | 5.71891e-14 | 1.000000 | 0.000000    | 1.000000 |
| rad70                         | 1.72142e-14 | 1.000000 | 1.72142e-14 | 1.000000 |
| PhcycC3H3_B+H                 | 1.54798e-14 | 1.000000 | 1.54798e-14 | 1.000000 |
| rad55                         | 7.63217e-15 | 1.000000 | 7.63217e-15 | 1.000000 |
| PAH1+H                        | 5.77897e-15 | 1.000000 | 5.77897e-15 | 1.000000 |
| rad52                         | 1.04914e-15 | 1.000000 | 1.04914e-15 | 1.000000 |

|           |             |         |             |         |
|-----------|-------------|---------|-------------|---------|
| rad58     | 4.91782e-16 | 1.00000 | 4.91782e-16 | 1.00000 |
| rad51     | 3.54209e-16 | 1.00000 | 3.54209e-16 | 1.00000 |
| rad34     | 3.15103e-16 | 1.00000 | 3.15103e-16 | 1.00000 |
| rad41     | 6.58203e-17 | 1.00000 | 6.58203e-17 | 1.00000 |
| rad42     | 4.80841e-17 | 1.00000 | 4.80841e-17 | 1.00000 |
| rad65     | 8.16178e-18 | 1.00000 | 8.16178e-18 | 1.00000 |
| rad53     | 1.76036e-19 | 1.00000 | 1.76036e-19 | 1.00000 |
| rad64     | 2.96517e-20 | 1.00000 | 2.96517e-20 | 1.00000 |
| rad61     | 1.40406e-21 | 1.00000 | 1.40406e-21 | 1.00000 |
| rad56     | 5.46521e-23 | 1.00000 | 5.46521e-23 | 1.00000 |
| rad68syn  | 4.98617e-24 | 1.00000 | 4.98617e-24 | 1.00000 |
| rad68anti | 3.92935e-24 | 1.00000 | 3.92935e-24 | 1.00000 |
| rad40syn  | 5.38958e-27 | 1.00000 | 5.38958e-27 | 1.00000 |
| rad40anti | 4.30388e-27 | 1.00000 | 4.30388e-27 | 1.00000 |
| rad73     | 2.64778e-28 | 1.00000 | 2.64778e-28 | 1.00000 |
| PAH8+H    | 1.67789e-28 | 1.00000 | 1.67789e-28 | 1.00000 |
| rad71     | 1.66935e-31 | 1.00000 | 1.66935e-31 | 1.00000 |
| rad47     | 6.30329e-35 | 1.00000 | 6.30329e-35 | 1.00000 |
| rad26     | 3.94021e-35 | 1.00000 | 3.94021e-35 | 1.00000 |
| rad28     | 9.31323e-36 | 1.00000 | 9.31323e-36 | 1.00000 |
| rad19anti | 8.69987e-36 | 1.00000 | 8.69987e-36 | 1.00000 |
| rad6      | 1.79039e-36 | 1.00000 | 1.79039e-36 | 1.00000 |
| rad2      | 8.50484e-37 | 1.00000 | 8.50484e-37 | 1.00000 |
| rad10     | 2.75333e-37 | 1.00000 | 2.75333e-37 | 1.00000 |
| rad1      | 5.64211e-38 | 1.00000 | 5.64211e-38 | 1.00000 |
| rad3      | 2.71857e-38 | 1.00000 | 2.71857e-38 | 1.00000 |
| rad14     | 2.29956e-38 | 1.00000 | 2.29956e-38 | 1.00000 |
| rad4      | 1.38981e-38 | 1.00000 | 1.38981e-38 | 1.00000 |
| rad25     | 1.30523e-38 | 1.00000 | 1.30523e-38 | 1.00000 |
| rad27     | 2.91726e-39 | 1.00000 | 2.91726e-39 | 1.00000 |
| rad9      | 2.35602e-40 | 1.00000 | 2.35602e-40 | 1.00000 |
| rad7      | 1.32729e-40 | 1.00000 | 1.32729e-40 | 1.00000 |
| rad11     | 7.98486e-41 | 1.00000 | 7.98486e-41 | 1.00000 |
| rad31     | 7.89253e-41 | 1.00000 | 7.89253e-41 | 1.00000 |
| rad5      | 2.73792e-42 | 1.00000 | 2.73792e-42 | 1.00000 |
| rad13     | 7.58504e-43 | 1.00000 | 7.58504e-43 | 1.00000 |
| rad33     | 3.07680e-43 | 1.00000 | 3.07680e-43 | 1.00000 |
| rad15     | 1.03862e-43 | 1.00000 | 1.03862e-43 | 1.00000 |
| rad19syn  | 8.89196e-45 | 1.00000 | 8.89196e-45 | 1.00000 |
| rad20     | 3.28783e-45 | 1.00000 | 3.28783e-45 | 1.00000 |
| rad21     | 2.84108e-45 | 1.00000 | 2.84108e-45 | 1.00000 |
| rad12     | 2.54088e-46 | 1.00000 | 2.54088e-46 | 1.00000 |
| rad18     | 1.66777e-47 | 1.00000 | 1.66777e-47 | 1.00000 |
| rad23     | 1.19928e-47 | 1.00000 | 1.19928e-47 | 1.00000 |
| rad45     | 5.88715e-50 | 1.00000 | 5.88715e-50 | 1.00000 |
| rad22     | 4.92826e-50 | 1.00000 | 4.92826e-50 | 1.00000 |
| rad24     | 1.99556e-50 | 1.00000 | 1.99556e-50 | 1.00000 |
| rad36     | 3.63205e-51 | 1.00000 | 3.63205e-51 | 1.00000 |
| rad8      | 3.08693e-67 | 1.00000 | 3.08693e-67 | 1.00000 |

0.100000000E-08 Pa, 180.000000 K

| Rate constant             | True (fraction)        | Effective (fraction)   |
|---------------------------|------------------------|------------------------|
| Total                     | 1.12884e-14 (1.00 )    | 1.12884e-14 (1.00 )    |
| Formation of rad19        | 1.12881e-14 (1.000 )   | 1.12881e-14 (1.000 )   |
| H-abstraction to cyc2enyl | 2.75916e-19 (2.44e-05) | 2.75916e-19 (2.44e-05) |
| H-abstraction to cyclenyl | 2.39955e-23 (2.13e-09) | 2.39955e-23 (2.13e-09) |

| species                       | PYtrue      | Cumul    | PYeffective | Cumul    |
|-------------------------------|-------------|----------|-------------|----------|
| Indene+H                      | 0.999638    | 0.999638 | 0.999638    | 0.999638 |
| PhCHCCH2+H                    | 0.000320239 | 0.999958 | 0.000320239 | 0.999958 |
| Benzene+cycloprop-2-enylidene | 2.44424e-05 | 0.999982 | 2.44424e-05 | 0.999982 |
| PhCCH+CH3                     | 5.69151e-06 | 0.999988 | 5.69151e-06 | 0.999988 |
| C2H2+PhCH2                    | 4.41182e-06 | 0.999992 | 4.41182e-06 | 0.999992 |
| PhCCCH3+H                     | 3.34271e-06 | 0.999996 | 3.34271e-06 | 0.999996 |
| Ph+MeAc                       | 2.73412e-06 | 0.999998 | 2.73412e-06 | 0.999998 |
| rad67                         | 8.07010e-07 | 0.999999 | 8.07010e-07 | 0.999999 |
| rad35                         | 3.49603e-07 | 1.000000 | 3.49603e-07 | 1.000000 |
| Ph+Allene                     | 2.89684e-07 | 1.000000 | 2.89684e-07 | 1.000000 |
| PhCH2CCH+H                    | 3.99486e-08 | 1.000000 | 3.99486e-08 | 1.000000 |
| PAH7+H                        | 3.42855e-08 | 1.000000 | 3.42855e-08 | 1.000000 |
| rad39                         | 9.67359e-09 | 1.000000 | 9.67359e-09 | 1.000000 |
| rad37                         | 9.25289e-09 | 1.000000 | 9.25289e-09 | 1.000000 |
| rad30                         | 6.63280e-09 | 1.000000 | 6.63280e-09 | 1.000000 |
| Benzene+cycloprop-1-enylidene | 2.12567e-09 | 1.000000 | 2.12567e-09 | 1.000000 |
| PAH9+H                        | 5.06928e-10 | 1.000000 | 5.06928e-10 | 1.000000 |
| rad38                         | 2.29255e-10 | 1.000000 | 2.29255e-10 | 1.000000 |
| rad60syn                      | 3.57046e-11 | 1.000000 | 3.57046e-11 | 1.000000 |

|                |             |          |             |          |
|----------------|-------------|----------|-------------|----------|
| PAH10+CH3      | 2.35102e-11 | 1.000000 | 2.35102e-11 | 1.000000 |
| PAH3+H         | 1.86591e-11 | 1.000000 | 1.86591e-11 | 1.000000 |
| rad60anti      | 1.77718e-11 | 1.000000 | 1.77718e-11 | 1.000000 |
| rad46          | 1.45760e-11 | 1.000000 | 1.45760e-11 | 1.000000 |
| PhcycC3H3_A+H  | 1.01655e-11 | 1.000000 | 1.01655e-11 | 1.000000 |
| rad59          | 3.71052e-12 | 1.000000 | 3.71052e-12 | 1.000000 |
| rad43          | 9.19879e-13 | 1.000000 | 9.19879e-13 | 1.000000 |
| rad54          | 8.60523e-13 | 1.000000 | 8.60523e-13 | 1.000000 |
| rad62          | 2.04292e-13 | 1.000000 | 2.04292e-13 | 1.000000 |
| rad50          | 1.42141e-13 | 1.000000 | 1.42141e-13 | 1.000000 |
| Phenyl+cycC3H4 | 8.44565e-14 | 1.000000 | 0.000000    | 1.000000 |
| PhcycC3H3_B+H  | 2.84776e-14 | 1.000000 | 2.84776e-14 | 1.000000 |
| rad70          | 2.05555e-14 | 1.000000 | 2.05555e-14 | 1.000000 |
| rad55          | 9.11579e-15 | 1.000000 | 9.11579e-15 | 1.000000 |
| PAH1+H         | 7.32394e-15 | 1.000000 | 7.32394e-15 | 1.000000 |
| rad52          | 1.21498e-15 | 1.000000 | 1.21498e-15 | 1.000000 |
| rad58          | 5.98636e-16 | 1.000000 | 5.98636e-16 | 1.000000 |
| rad51          | 4.25485e-16 | 1.000000 | 4.25485e-16 | 1.000000 |
| rad34          | 4.00857e-16 | 1.000000 | 4.00857e-16 | 1.000000 |
| rad41          | 8.74643e-17 | 1.000000 | 8.74643e-17 | 1.000000 |
| rad42          | 6.22157e-17 | 1.000000 | 6.22157e-17 | 1.000000 |
| rad65          | 9.95949e-18 | 1.000000 | 9.95949e-18 | 1.000000 |
| rad53          | 3.16150e-19 | 1.000000 | 3.16150e-19 | 1.000000 |
| rad64          | 5.99926e-20 | 1.000000 | 5.99926e-20 | 1.000000 |
| rad61          | 4.00801e-21 | 1.000000 | 4.00801e-21 | 1.000000 |
| rad56          | 1.79227e-22 | 1.000000 | 1.79227e-22 | 1.000000 |
| rad68syn       | 1.75240e-23 | 1.000000 | 1.75240e-23 | 1.000000 |
| rad68anti      | 1.37247e-23 | 1.000000 | 1.37247e-23 | 1.000000 |
| rad40syn       | 3.05803e-26 | 1.000000 | 3.05803e-26 | 1.000000 |
| rad40anti      | 2.44831e-26 | 1.000000 | 2.44831e-26 | 1.000000 |
| rad73          | 1.39313e-27 | 1.000000 | 1.39313e-27 | 1.000000 |
| PAH8+H         | 1.32188e-27 | 1.000000 | 1.32188e-27 | 1.000000 |
| rad71          | 1.48898e-30 | 1.000000 | 1.48898e-30 | 1.000000 |
| rad47          | 6.50507e-35 | 1.000000 | 6.50507e-35 | 1.000000 |
| rad26          | 3.68542e-35 | 1.000000 | 3.68542e-35 | 1.000000 |
| rad19anti      | 2.31119e-35 | 1.000000 | 2.31119e-35 | 1.000000 |
| rad28          | 8.64000e-36 | 1.000000 | 8.64000e-36 | 1.000000 |
| rad6           | 1.77552e-36 | 1.000000 | 1.77552e-36 | 1.000000 |
| rad2           | 7.95305e-37 | 1.000000 | 7.95305e-37 | 1.000000 |
| rad10          | 3.86268e-37 | 1.000000 | 3.86268e-37 | 1.000000 |
| rad1           | 5.30961e-38 | 1.000000 | 5.30961e-38 | 1.000000 |
| rad14          | 2.30671e-38 | 1.000000 | 2.30671e-38 | 1.000000 |
| rad3           | 2.02423e-38 | 1.000000 | 2.02423e-38 | 1.000000 |
| rad25          | 1.33411e-38 | 1.000000 | 1.33411e-38 | 1.000000 |
| rad4           | 1.03676e-38 | 1.000000 | 1.03676e-38 | 1.000000 |
| rad27          | 3.01462e-39 | 1.000000 | 3.01462e-39 | 1.000000 |
| rad9           | 3.23501e-40 | 1.000000 | 3.23501e-40 | 1.000000 |
| rad31          | 1.69327e-40 | 1.000000 | 1.69327e-40 | 1.000000 |
| rad7           | 1.31924e-40 | 1.000000 | 1.31924e-40 | 1.000000 |
| rad11          | 8.13664e-41 | 1.000000 | 8.13664e-41 | 1.000000 |
| rad5           | 2.62787e-42 | 1.000000 | 2.62787e-42 | 1.000000 |
| rad13          | 7.57321e-43 | 1.000000 | 7.57321e-43 | 1.000000 |
| rad33          | 3.51271e-43 | 1.000000 | 3.51271e-43 | 1.000000 |
| rad15          | 1.42784e-43 | 1.000000 | 1.42784e-43 | 1.000000 |
| rad19syn       | 2.57212e-44 | 1.000000 | 2.57212e-44 | 1.000000 |
| rad20          | 3.91926e-45 | 1.000000 | 3.91926e-45 | 1.000000 |
| rad21          | 3.42008e-45 | 1.000000 | 3.42008e-45 | 1.000000 |
| rad12          | 3.94125e-46 | 1.000000 | 3.94125e-46 | 1.000000 |
| rad23          | 3.30104e-47 | 1.000000 | 3.30104e-47 | 1.000000 |
| rad18          | 1.79860e-47 | 1.000000 | 1.79860e-47 | 1.000000 |
| rad45          | 1.27023e-49 | 1.000000 | 1.27023e-49 | 1.000000 |
| rad22          | 5.02126e-50 | 1.000000 | 5.02126e-50 | 1.000000 |
| rad24          | 2.79582e-50 | 1.000000 | 2.79582e-50 | 1.000000 |
| rad36          | 7.85018e-51 | 1.000000 | 7.85018e-51 | 1.000000 |
| rad8           | 4.95693e-67 | 1.000000 | 4.95693e-67 | 1.000000 |

0.100000000E-08 Pa, 190.000000 K

| Rate constant                 | True (fraction)        | Effective (fraction)   |             |          |
|-------------------------------|------------------------|------------------------|-------------|----------|
| Total                         | 1.32132e-14 (1.00 )    | 1.32132e-14 (1.00 )    |             |          |
| Formation of rad19            | 1.32126e-14 (1.000 )   | 1.32126e-14 (1.000 )   |             |          |
| H-abstraction to cyc2enyl     | 5.62053e-19 (4.25e-05) | 5.62053e-19 (4.25e-05) |             |          |
| H-abstraction to cyclenyl     | 8.18073e-23 (6.19e-09) | 8.18073e-23 (6.19e-09) |             |          |
| species                       | PYtrue                 | Cumul                  | PYeffective | Cumul    |
| Indene+H                      | 0.999606               | 0.999606               | 0.999606    | 0.999606 |
| PhCHCH2+H                     | 0.000332293            | 0.999939               | 0.000332293 | 0.999939 |
| Benzene+cycloprop-2-enylidene | 4.25373e-05            | 0.999981               | 4.25373e-05 | 0.999981 |



|                               |             |          |             |          |
|-------------------------------|-------------|----------|-------------|----------|
| PhCCH+CH3                     | 5.91707e-06 | 0.999987 | 5.91707e-06 | 0.999987 |
| C2H2+PhCH2                    | 4.63023e-06 | 0.999992 | 4.63023e-06 | 0.999992 |
| PhCCCH3+H                     | 3.49167e-06 | 0.999995 | 3.49167e-06 | 0.999995 |
| Ph+MeAc                       | 2.88479e-06 | 0.999998 | 2.88479e-06 | 0.999998 |
| rad67                         | 8.49457e-07 | 0.999999 | 8.49457e-07 | 0.999999 |
| rad35                         | 3.67207e-07 | 0.999999 | 3.67207e-07 | 0.999999 |
| Ph+Allene                     | 3.12197e-07 | 1.000000 | 3.12197e-07 | 1.000000 |
| PhCH2CCH+H                    | 4.36151e-08 | 1.000000 | 4.36151e-08 | 1.000000 |
| PAH7+H                        | 3.65230e-08 | 1.000000 | 3.65230e-08 | 1.000000 |
| rad39                         | 1.03032e-08 | 1.000000 | 1.03032e-08 | 1.000000 |
| rad37                         | 9.89464e-09 | 1.000000 | 9.89464e-09 | 1.000000 |
| rad30                         | 6.98058e-09 | 1.000000 | 6.98058e-09 | 1.000000 |
| Benzene+cycloprop-1-enylidene | 6.19133e-09 | 1.000000 | 6.19133e-09 | 1.000000 |
| PAH9+H                        | 5.42590e-10 | 1.000000 | 5.42590e-10 | 1.000000 |
| rad38                         | 2.47359e-10 | 1.000000 | 2.47359e-10 | 1.000000 |
| rad60syn                      | 3.84183e-11 | 1.000000 | 3.84183e-11 | 1.000000 |
| PAH10+CH3                     | 2.71459e-11 | 1.000000 | 2.71459e-11 | 1.000000 |
| PAH3+H                        | 2.06610e-11 | 1.000000 | 2.06610e-11 | 1.000000 |
| rad60anti                     | 1.91607e-11 | 1.000000 | 1.91607e-11 | 1.000000 |
| rad46                         | 1.58119e-11 | 1.000000 | 1.58119e-11 | 1.000000 |
| PhcycC3H3_A+H                 | 1.33135e-11 | 1.000000 | 1.33135e-11 | 1.000000 |
| rad59                         | 4.08946e-12 | 1.000000 | 4.08946e-12 | 1.000000 |
| rad43                         | 1.04096e-12 | 1.000000 | 1.04096e-12 | 1.000000 |
| rad54                         | 9.92552e-13 | 1.000000 | 9.92552e-13 | 1.000000 |
| rad62                         | 2.31631e-13 | 1.000000 | 2.31631e-13 | 1.000000 |
| rad50                         | 1.60801e-13 | 1.000000 | 1.60801e-13 | 1.000000 |
| Phenyl+cycC3H4                | 1.24603e-13 | 1.000000 | 0.000000    | 1.000000 |
| PhcycC3H3_B+H                 | 5.08976e-14 | 1.000000 | 5.08976e-14 | 1.000000 |
| rad70                         | 2.47658e-14 | 1.000000 | 2.47658e-14 | 1.000000 |
| rad55                         | 1.09840e-14 | 1.000000 | 1.09840e-14 | 1.000000 |
| PAH1+H                        | 9.37357e-15 | 1.000000 | 9.37357e-15 | 1.000000 |
| rad52                         | 1.41930e-15 | 1.000000 | 1.41930e-15 | 1.000000 |
| rad58                         | 7.35874e-16 | 1.000000 | 7.35874e-16 | 1.000000 |
| rad51                         | 5.16512e-16 | 1.000000 | 5.16512e-16 | 1.000000 |
| rad34                         | 5.15049e-16 | 1.000000 | 5.15049e-16 | 1.000000 |
| rad41                         | 1.17041e-16 | 1.000000 | 1.17041e-16 | 1.000000 |
| rad42                         | 8.10502e-17 | 1.000000 | 8.10502e-17 | 1.000000 |
| rad65                         | 1.22862e-17 | 1.000000 | 1.22862e-17 | 1.000000 |
| rad53                         | 5.56219e-19 | 1.000000 | 5.56219e-19 | 1.000000 |
| rad64                         | 1.17042e-19 | 1.000000 | 1.17042e-19 | 1.000000 |
| rad61                         | 1.05588e-20 | 1.000000 | 1.05588e-20 | 1.000000 |
| rad56                         | 5.33231e-22 | 1.000000 | 5.33231e-22 | 1.000000 |
| rad68syn                      | 5.52671e-23 | 1.000000 | 5.52671e-23 | 1.000000 |
| rad68anti                     | 4.30019e-23 | 1.000000 | 4.30019e-23 | 1.000000 |
| rad40syn                      | 1.47212e-25 | 1.000000 | 1.47212e-25 | 1.000000 |
| rad40anti                     | 1.18054e-25 | 1.000000 | 1.18054e-25 | 1.000000 |
| PAH8+H                        | 8.53886e-27 | 1.000000 | 8.53886e-27 | 1.000000 |
| rad73                         | 6.34253e-27 | 1.000000 | 6.34253e-27 | 1.000000 |
| rad71                         | 1.07847e-29 | 1.000000 | 1.07847e-29 | 1.000000 |
| rad47                         | 6.79798e-35 | 1.000000 | 6.79798e-35 | 1.000000 |
| rad19anti                     | 6.45010e-35 | 1.000000 | 6.45010e-35 | 1.000000 |
| rad26                         | 3.45886e-35 | 1.000000 | 3.45886e-35 | 1.000000 |
| rad28                         | 8.04044e-36 | 1.000000 | 8.04044e-36 | 1.000000 |
| rad2                          | 6.33177e-36 | 1.000000 | 6.33177e-36 | 1.000000 |
| rad6                          | 1.94729e-36 | 1.000000 | 1.94729e-36 | 1.000000 |
| rad10                         | 5.76431e-37 | 1.000000 | 5.76431e-37 | 1.000000 |
| rad1                          | 4.25843e-37 | 1.000000 | 4.25843e-37 | 1.000000 |
| rad14                         | 2.32828e-38 | 1.000000 | 2.32828e-38 | 1.000000 |
| rad25                         | 1.37281e-38 | 1.000000 | 1.37281e-38 | 1.000000 |
| rad3                          | 1.23527e-38 | 1.000000 | 1.23527e-38 | 1.000000 |
| rad4                          | 6.33714e-39 | 1.000000 | 6.33714e-39 | 1.000000 |
| rad27                         | 3.13775e-39 | 1.000000 | 3.13775e-39 | 1.000000 |
| rad9                          | 4.52904e-40 | 1.000000 | 4.52904e-40 | 1.000000 |
| rad31                         | 3.79748e-40 | 1.000000 | 3.79748e-40 | 1.000000 |
| rad7                          | 1.44919e-40 | 1.000000 | 1.44919e-40 | 1.000000 |
| rad11                         | 8.65440e-41 | 1.000000 | 8.65440e-41 | 1.000000 |
| rad5                          | 2.53102e-42 | 1.000000 | 2.53102e-42 | 1.000000 |
| rad13                         | 8.34162e-43 | 1.000000 | 8.34162e-43 | 1.000000 |
| rad33                         | 4.05539e-43 | 1.000000 | 4.05539e-43 | 1.000000 |
| rad15                         | 2.00176e-43 | 1.000000 | 2.00176e-43 | 1.000000 |
| rad19syn                      | 7.83212e-44 | 1.000000 | 7.83212e-44 | 1.000000 |
| rad20                         | 4.72928e-45 | 1.000000 | 4.72928e-45 | 1.000000 |
| rad21                         | 4.16983e-45 | 1.000000 | 4.16983e-45 | 1.000000 |
| rad12                         | 6.26740e-46 | 1.000000 | 6.26740e-46 | 1.000000 |
| rad23                         | 9.91306e-47 | 1.000000 | 9.91306e-47 | 1.000000 |
| rad18                         | 1.95367e-47 | 1.000000 | 1.95367e-47 | 1.000000 |
| rad45                         | 1.72803e-49 | 1.000000 | 1.72803e-49 | 1.000000 |
| rad22                         | 5.14142e-50 | 1.000000 | 5.14142e-50 | 1.000000 |
| rad24                         | 3.99372e-50 | 1.000000 | 3.99372e-50 | 1.000000 |
| rad36                         | 1.07080e-50 | 1.000000 | 1.07080e-50 | 1.000000 |

rad8 | 8.12778e-67 1.000000 | 8.12778e-67 1.000000

0.100000000E-08 Pa, 200.000000 K

=====

| Rate constant             | True (fraction)        | Effective (fraction)   |
|---------------------------|------------------------|------------------------|
| Total                     | 1.52621e-14 (1.00 )    | 1.52621e-14 (1.00 )    |
| Formation of rad19        | 1.52610e-14 (1.000 )   | 1.52610e-14 (1.000 )   |
| H-abstraction to cyc2enyl | 1.06427e-18 (6.97e-05) | 1.06427e-18 (6.97e-05) |
| H-abstraction to cyc1enyl | 2.46309e-22 (1.61e-08) | 2.46309e-22 (1.61e-08) |

| species                       | PYtrue      | Cumul    | PYeffective | Cumul    |
|-------------------------------|-------------|----------|-------------|----------|
| Indene+H                      | 0.999565    | 0.999565 | 0.999565    | 0.999565 |
| PhCHCCH2+H                    | 0.000345433 | 0.999911 | 0.000345433 | 0.999911 |
| Benzene+cycloprop-2-enylidene | 6.97330e-05 | 0.999980 | 6.97330e-05 | 0.999980 |
| PhCCH+CH3                     | 6.16243e-06 | 0.999987 | 6.16243e-06 | 0.999987 |
| C2H2+PhCH2                    | 4.87110e-06 | 0.999991 | 4.87110e-06 | 0.999991 |
| PhCCCH3+H                     | 3.65492e-06 | 0.999995 | 3.65492e-06 | 0.999995 |
| Ph+MeAc                       | 3.05169e-06 | 0.999998 | 3.05169e-06 | 0.999998 |
| rad67                         | 8.96414e-07 | 0.999999 | 8.96414e-07 | 0.999999 |
| rad35                         | 3.86641e-07 | 0.999999 | 3.86641e-07 | 0.999999 |
| Ph+Allene                     | 3.37776e-07 | 1.000000 | 3.37776e-07 | 1.000000 |
| PhCH2CCH+H                    | 4.78388e-08 | 1.000000 | 4.78388e-08 | 1.000000 |
| PAH7+H                        | 3.90324e-08 | 1.000000 | 3.90324e-08 | 1.000000 |
| Benzene+cycloprop-1-enylidene | 1.61386e-08 | 1.000000 | 1.61386e-08 | 1.000000 |
| rad39                         | 1.10085e-08 | 1.000000 | 1.10085e-08 | 1.000000 |
| rad37                         | 1.06172e-08 | 1.000000 | 1.06172e-08 | 1.000000 |
| rad30                         | 7.36603e-09 | 1.000000 | 7.36603e-09 | 1.000000 |
| PAH9+H                        | 5.82902e-10 | 1.000000 | 5.82902e-10 | 1.000000 |
| rad38                         | 2.68036e-10 | 1.000000 | 2.68036e-10 | 1.000000 |
| rad60syn                      | 4.15004e-11 | 1.000000 | 4.15004e-11 | 1.000000 |
| PAH10+CH3                     | 3.15724e-11 | 1.000000 | 3.15724e-11 | 1.000000 |
| PAH3+H                        | 2.30055e-11 | 1.000000 | 2.30055e-11 | 1.000000 |
| rad60anti                     | 2.07416e-11 | 1.000000 | 2.07416e-11 | 1.000000 |
| PhcycC3H3_A+H                 | 1.75314e-11 | 1.000000 | 1.75314e-11 | 1.000000 |
| rad46                         | 1.72300e-11 | 1.000000 | 1.72300e-11 | 1.000000 |
| rad59                         | 4.53088e-12 | 1.000000 | 4.53088e-12 | 1.000000 |
| rad43                         | 1.18504e-12 | 1.000000 | 1.18504e-12 | 1.000000 |
| rad54                         | 1.15325e-12 | 1.000000 | 1.15325e-12 | 1.000000 |
| rad62                         | 2.64143e-13 | 1.000000 | 2.64143e-13 | 1.000000 |
| Phenyl+cycC3H4                | 1.83626e-13 | 1.000000 | 0.00000     | 1.000000 |
| rad50                         | 1.83198e-13 | 1.000000 | 1.83198e-13 | 1.000000 |
| PhcycC3H3_B+H                 | 8.87690e-14 | 1.000000 | 8.87690e-14 | 1.000000 |
| rad70                         | 3.01009e-14 | 1.000000 | 3.01009e-14 | 1.000000 |
| rad55                         | 1.33496e-14 | 1.000000 | 1.33496e-14 | 1.000000 |
| PAH1+H                        | 1.21077e-14 | 1.000000 | 1.21077e-14 | 1.000000 |
| rad52                         | 1.67258e-15 | 1.000000 | 1.67258e-15 | 1.000000 |
| rad58                         | 9.13220e-16 | 1.000000 | 9.13220e-16 | 1.000000 |
| rad34                         | 6.67958e-16 | 1.000000 | 6.67958e-16 | 1.000000 |
| rad51                         | 6.33617e-16 | 1.000000 | 6.33617e-16 | 1.000000 |
| rad41                         | 1.57585e-16 | 1.000000 | 1.57585e-16 | 1.000000 |
| rad42                         | 1.06227e-16 | 1.000000 | 1.06227e-16 | 1.000000 |
| rad65                         | 1.53192e-17 | 1.000000 | 1.53192e-17 | 1.000000 |
| rad53                         | 9.61974e-19 | 1.000000 | 9.61974e-19 | 1.000000 |
| rad64                         | 2.21495e-19 | 1.000000 | 2.21495e-19 | 1.000000 |
| rad61                         | 2.60103e-20 | 1.000000 | 2.60103e-20 | 1.000000 |
| rad56                         | 1.46279e-21 | 1.000000 | 1.46279e-21 | 1.000000 |
| rad68syn                      | 1.59261e-22 | 1.000000 | 1.59261e-22 | 1.000000 |
| rad68anti                     | 1.23075e-22 | 1.000000 | 1.23075e-22 | 1.000000 |
| rad40syn                      | 6.17076e-25 | 1.000000 | 6.17076e-25 | 1.000000 |
| rad40anti                     | 4.95189e-25 | 1.000000 | 4.95189e-25 | 1.000000 |
| PAH8+H                        | 4.65852e-26 | 1.000000 | 4.65852e-26 | 1.000000 |
| rad73                         | 2.55582e-26 | 1.000000 | 2.55582e-26 | 1.000000 |
| rad71                         | 6.53613e-29 | 1.000000 | 6.53613e-29 | 1.000000 |
| rad19anti                     | 1.88664e-34 | 1.000000 | 1.88664e-34 | 1.000000 |
| rad47                         | 7.19638e-35 | 1.000000 | 7.19638e-35 | 1.000000 |
| rad26                         | 3.25578e-35 | 1.000000 | 3.25578e-35 | 1.000000 |
| rad28                         | 7.50234e-36 | 1.000000 | 7.50234e-36 | 1.000000 |
| rad2                          | 4.45260e-36 | 1.000000 | 4.45260e-36 | 1.000000 |
| rad6                          | 2.72295e-36 | 1.000000 | 2.72295e-36 | 1.000000 |
| rad10                         | 9.11479e-37 | 1.000000 | 9.11479e-37 | 1.000000 |
| rad1                          | 3.01767e-37 | 1.000000 | 3.01767e-37 | 1.000000 |
| rad3                          | 3.92276e-38 | 1.000000 | 3.92276e-38 | 1.000000 |
| rad14                         | 2.36376e-38 | 1.000000 | 2.36376e-38 | 1.000000 |
| rad4                          | 2.01707e-38 | 1.000000 | 2.01707e-38 | 1.000000 |
| rad25                         | 1.42165e-38 | 1.000000 | 1.42165e-38 | 1.000000 |
| rad27                         | 3.28836e-39 | 1.000000 | 3.28836e-39 | 1.000000 |
| rad31                         | 8.89667e-40 | 1.000000 | 8.89667e-40 | 1.000000 |
| rad9                          | 6.46493e-40 | 1.000000 | 6.46493e-40 | 1.000000 |

|          |             |          |             |          |
|----------|-------------|----------|-------------|----------|
| rad7     | 2.02665e-40 | 1.000000 | 2.02665e-40 | 1.000000 |
| rad11    | 1.02631e-40 | 1.000000 | 1.02631e-40 | 1.000000 |
| rad5     | 2.44507e-42 | 1.000000 | 2.44507e-42 | 1.000000 |
| rad13    | 1.16367e-42 | 1.000000 | 1.16367e-42 | 1.000000 |
| rad33    | 4.73553e-43 | 1.000000 | 4.73553e-43 | 1.000000 |
| rad15    | 2.86183e-43 | 1.000000 | 2.86183e-43 | 1.000000 |
| rad19syn | 2.51002e-43 | 1.000000 | 2.51002e-43 | 1.000000 |
| rad20    | 5.77545e-45 | 1.000000 | 5.77545e-45 | 1.000000 |
| rad21    | 5.14812e-45 | 1.000000 | 5.14812e-45 | 1.000000 |
| rad12    | 1.02193e-45 | 1.000000 | 1.02193e-45 | 1.000000 |
| rad23    | 3.28898e-46 | 1.000000 | 3.28898e-46 | 1.000000 |
| rad18    | 2.13652e-47 | 1.000000 | 2.13652e-47 | 1.000000 |
| rad45    | 6.86486e-48 | 1.000000 | 6.86486e-48 | 1.000000 |
| rad36    | 4.26584e-49 | 1.000000 | 4.26584e-49 | 1.000000 |
| rad24    | 5.81686e-50 | 1.000000 | 5.81686e-50 | 1.000000 |
| rad22    | 5.28978e-50 | 1.000000 | 5.28978e-50 | 1.000000 |
| rad8     | 1.36072e-66 | 1.000000 | 1.36072e-66 | 1.000000 |

0.100000000E-08 Pa, 210.000000 K

| Rate constant             | True (fraction)        | Effective (fraction)   |
|---------------------------|------------------------|------------------------|
| Total                     | 1.74272e-14 (1.00 )    | 1.74272e-14 (1.00 )    |
| Formation of rad19        | 1.74253e-14 (1.000 )   | 1.74253e-14 (1.000 )   |
| H-abstraction to cyc2enyl | 1.89310e-18 (0.000109) | 1.89310e-18 (0.000109) |
| H-abstraction to cyclenyl | 6.66714e-22 (3.83e-08) | 6.66714e-22 (3.83e-08) |

| species                       | PYtrue      | Cumul    | PYeffective | Cumul    |
|-------------------------------|-------------|----------|-------------|----------|
| Indene+H                      | 0.999511    | 0.999511 | 0.999511    | 0.999511 |
| PhCHCCH2+H                    | 0.000359771 | 0.999871 | 0.000359771 | 0.999871 |
| Benzene+cycloprop-2-enylidene | 0.000108629 | 0.999980 | 0.000108629 | 0.999980 |
| PhCCH+CH3                     | 6.42954e-06 | 0.999986 | 6.42954e-06 | 0.999986 |
| C2H2+PhCH2                    | 5.13705e-06 | 0.999991 | 5.13705e-06 | 0.999991 |
| PhCCCH3+H                     | 3.83397e-06 | 0.999995 | 3.83397e-06 | 0.999995 |
| Ph+MeAc                       | 3.23682e-06 | 0.999998 | 3.23682e-06 | 0.999998 |
| rad67                         | 9.48433e-07 | 0.999999 | 9.48433e-07 | 0.999999 |
| rad35                         | 4.08123e-07 | 1.000000 | 4.08123e-07 | 1.000000 |
| Ph+Allene                     | 3.66908e-07 | 1.000000 | 3.66908e-07 | 1.000000 |
| PhCH2CCH+H                    | 5.27181e-08 | 1.000000 | 5.27181e-08 | 1.000000 |
| PAH7+H                        | 4.18517e-08 | 1.000000 | 4.18517e-08 | 1.000000 |
| Benzene+cycloprop-1-enylidene | 3.82571e-08 | 1.000000 | 3.82571e-08 | 1.000000 |
| rad39                         | 1.18003e-08 | 1.000000 | 1.18003e-08 | 1.000000 |
| rad37                         | 1.14322e-08 | 1.000000 | 1.14322e-08 | 1.000000 |
| rad30                         | 7.79386e-09 | 1.000000 | 7.79386e-09 | 1.000000 |
| PAH9+H                        | 6.28582e-10 | 1.000000 | 6.28582e-10 | 1.000000 |
| rad38                         | 2.91718e-10 | 1.000000 | 2.91718e-10 | 1.000000 |
| rad60syn                      | 4.50097e-11 | 1.000000 | 4.50097e-11 | 1.000000 |
| PAH10+CH3                     | 3.69848e-11 | 1.000000 | 3.69848e-11 | 1.000000 |
| PAH3+H                        | 2.57613e-11 | 1.000000 | 2.57613e-11 | 1.000000 |
| PhcycC3H3_A+H                 | 2.31914e-11 | 1.000000 | 2.31914e-11 | 1.000000 |
| rad60anti                     | 2.25454e-11 | 1.000000 | 2.25454e-11 | 1.000000 |
| rad46                         | 1.88621e-11 | 1.000000 | 1.88621e-11 | 1.000000 |
| rad59                         | 5.04687e-12 | 1.000000 | 5.04687e-12 | 1.000000 |
| rad43                         | 1.35708e-12 | 1.000000 | 1.35708e-12 | 1.000000 |
| rad54                         | 1.34969e-12 | 1.000000 | 1.34969e-12 | 1.000000 |
| rad62                         | 3.02922e-13 | 1.000000 | 3.02922e-13 | 1.000000 |
| Phenyl+cycC3H4                | 2.70226e-13 | 1.000000 | 0.000000    | 1.000000 |
| rad50                         | 2.10210e-13 | 1.000000 | 2.10210e-13 | 1.000000 |
| PhcycC3H3_B+H                 | 1.51586e-13 | 1.000000 | 1.51586e-13 | 1.000000 |
| rad70                         | 3.68946e-14 | 1.000000 | 3.68946e-14 | 1.000000 |
| rad55                         | 1.63588e-14 | 1.000000 | 1.63588e-14 | 1.000000 |
| PAH1+H                        | 1.57712e-14 | 1.000000 | 1.57712e-14 | 1.000000 |
| rad52                         | 1.98838e-15 | 1.000000 | 1.98838e-15 | 1.000000 |
| rad58                         | 1.14364e-15 | 1.000000 | 1.14364e-15 | 1.000000 |
| rad34                         | 8.73664e-16 | 1.000000 | 8.73664e-16 | 1.000000 |
| rad51                         | 7.85267e-16 | 1.000000 | 7.85267e-16 | 1.000000 |
| rad41                         | 2.13280e-16 | 1.000000 | 2.13280e-16 | 1.000000 |
| rad42                         | 1.39947e-16 | 1.000000 | 1.39947e-16 | 1.000000 |
| rad65                         | 1.92990e-17 | 1.000000 | 1.92990e-17 | 1.000000 |
| rad53                         | 1.63950e-18 | 1.000000 | 1.63950e-18 | 1.000000 |
| rad64                         | 4.08414e-19 | 1.000000 | 4.08414e-19 | 1.000000 |
| rad61                         | 6.05363e-20 | 1.000000 | 6.05363e-20 | 1.000000 |
| rad56                         | 3.74745e-21 | 1.000000 | 3.74745e-21 | 1.000000 |
| rad68syn                      | 4.25367e-22 | 1.000000 | 4.25367e-22 | 1.000000 |
| rad68anti                     | 3.26442e-22 | 1.000000 | 3.26442e-22 | 1.000000 |
| rad40syn                      | 2.29907e-24 | 1.000000 | 2.29907e-24 | 1.000000 |
| rad40anti                     | 1.84461e-24 | 1.000000 | 1.84461e-24 | 1.000000 |
| PAH8+H                        | 2.19678e-25 | 1.000000 | 2.19678e-25 | 1.000000 |
| rad73                         | 9.27903e-26 | 1.000000 | 9.27903e-26 | 1.000000 |

|           |             |         |             |         |
|-----------|-------------|---------|-------------|---------|
| rad71     | 3.39170e-28 | 1.00000 | 3.39170e-28 | 1.00000 |
| rad19anti | 5.76790e-34 | 1.00000 | 5.76790e-34 | 1.00000 |
| rad47     | 7.72082e-35 | 1.00000 | 7.72082e-35 | 1.00000 |
| rad26     | 3.07252e-35 | 1.00000 | 3.07252e-35 | 1.00000 |
| rad28     | 7.01618e-36 | 1.00000 | 7.01618e-36 | 1.00000 |
| rad2      | 6.16493e-36 | 1.00000 | 6.16493e-36 | 1.00000 |
| rad6      | 5.71510e-36 | 1.00000 | 5.71510e-36 | 1.00000 |
| rad10     | 1.52218e-36 | 1.00000 | 1.52218e-36 | 1.00000 |
| rad1      | 4.21312e-37 | 1.00000 | 4.21312e-37 | 1.00000 |
| rad3      | 2.79290e-38 | 1.00000 | 2.79290e-38 | 1.00000 |
| rad14     | 2.41305e-38 | 1.00000 | 2.41305e-38 | 1.00000 |
| rad25     | 1.48124e-38 | 1.00000 | 1.48124e-38 | 1.00000 |
| rad4      | 1.43957e-38 | 1.00000 | 1.43957e-38 | 1.00000 |
| rad27     | 3.46897e-39 | 1.00000 | 3.46897e-39 | 1.00000 |
| rad31     | 2.17525e-39 | 1.00000 | 2.17525e-39 | 1.00000 |
| rad9      | 9.41007e-40 | 1.00000 | 9.41007e-40 | 1.00000 |
| rad7      | 4.24912e-40 | 1.00000 | 4.24912e-40 | 1.00000 |
| rad11     | 1.57408e-40 | 1.00000 | 1.57408e-40 | 1.00000 |
| rad13     | 2.42253e-42 | 1.00000 | 2.42253e-42 | 1.00000 |
| rad5      | 2.36818e-42 | 1.00000 | 2.36818e-42 | 1.00000 |
| rad19syn  | 8.46110e-43 | 1.00000 | 8.46110e-43 | 1.00000 |
| rad33     | 5.60129e-43 | 1.00000 | 5.60129e-43 | 1.00000 |
| rad15     | 4.17263e-43 | 1.00000 | 4.17263e-43 | 1.00000 |
| rad20     | 7.13717e-45 | 1.00000 | 7.13717e-45 | 1.00000 |
| rad21     | 6.43558e-45 | 1.00000 | 6.43558e-45 | 1.00000 |
| rad12     | 1.70912e-45 | 1.00000 | 1.70912e-45 | 1.00000 |
| rad23     | 1.18049e-45 | 1.00000 | 1.18049e-45 | 1.00000 |
| rad18     | 2.35158e-47 | 1.00000 | 2.35158e-47 | 1.00000 |
| rad45     | 1.20673e-47 | 1.00000 | 1.20673e-47 | 1.00000 |
| rad36     | 7.52028e-49 | 1.00000 | 7.52028e-49 | 1.00000 |
| rad24     | 8.63991e-50 | 1.00000 | 8.63991e-50 | 1.00000 |
| rad22     | 5.47213e-50 | 1.00000 | 5.47213e-50 | 1.00000 |
| rad8      | 2.32606e-66 | 1.00000 | 2.32606e-66 | 1.00000 |

0.100000000E-08 Pa, 220.000000 K

=====

| Rate constant             | True (fraction)        | Effective (fraction)   |
|---------------------------|------------------------|------------------------|
| Total                     | 1.97009e-14 (1.00 )    | 1.97009e-14 (1.00 )    |
| Formation of rad19        | 1.96977e-14 (1.000 )   | 1.96977e-14 (1.000 )   |
| H-abstraction to cyc2enyl | 3.19064e-18 (0.000162) | 3.19064e-18 (0.000162) |
| H-abstraction to cyclenyl | 1.64627e-21 (8.36e-08) | 1.64627e-21 (8.36e-08) |

| species                       | PYtrue      | Cumul    | PYeffective | Cumul    |
|-------------------------------|-------------|----------|-------------|----------|
| Indene+H                      | 0.999441    | 0.999441 | 0.999441    | 0.999441 |
| PhCHCCH2+H                    | 0.000375424 | 0.999816 | 0.000375424 | 0.999816 |
| Benzene+cycloprop-2-enylidene | 0.000161954 | 0.999978 | 0.000161954 | 0.999978 |
| PhCCH+CH3                     | 6.72039e-06 | 0.999985 | 6.72039e-06 | 0.999985 |
| C2H2+PhCH2                    | 5.43098e-06 | 0.999991 | 5.43098e-06 | 0.999991 |
| PhCCCH3+H                     | 4.03052e-06 | 0.999995 | 4.03052e-06 | 0.999995 |
| Ph+MeAc                       | 3.44236e-06 | 0.999998 | 3.44236e-06 | 0.999998 |
| rad67                         | 1.00612e-06 | 0.999999 | 1.00612e-06 | 0.999999 |
| rad35                         | 4.31892e-07 | 0.999999 | 4.31892e-07 | 0.999999 |
| Ph+Allene                     | 4.00152e-07 | 1.000000 | 4.00152e-07 | 1.000000 |
| Benzene+cycloprop-1-enylidene | 8.35632e-08 | 1.000000 | 8.35632e-08 | 1.000000 |
| PhCH2CCH+H                    | 5.83685e-08 | 1.000000 | 5.83685e-08 | 1.000000 |
| PAH7+H                        | 4.50239e-08 | 1.000000 | 4.50239e-08 | 1.000000 |
| rad39                         | 1.26902e-08 | 1.000000 | 1.26902e-08 | 1.000000 |
| rad37                         | 1.23532e-08 | 1.000000 | 1.23532e-08 | 1.000000 |
| rad30                         | 8.26934e-09 | 1.000000 | 8.26934e-09 | 1.000000 |
| PAH9+H                        | 6.80449e-10 | 1.000000 | 6.80449e-10 | 1.000000 |
| rad38                         | 3.18912e-10 | 1.000000 | 3.18912e-10 | 1.000000 |
| rad60syn                      | 4.90141e-11 | 1.000000 | 4.90141e-11 | 1.000000 |
| PAH10+CH3                     | 4.36275e-11 | 1.000000 | 4.36275e-11 | 1.000000 |
| PhcycC3H3_A+H                 | 3.07931e-11 | 1.000000 | 3.07931e-11 | 1.000000 |
| PAH3+H                        | 2.90111e-11 | 1.000000 | 2.90111e-11 | 1.000000 |
| rad60anti                     | 2.46085e-11 | 1.000000 | 2.46085e-11 | 1.000000 |
| rad46                         | 2.07451e-11 | 1.000000 | 2.07451e-11 | 1.000000 |
| rad59                         | 5.65179e-12 | 1.000000 | 5.65179e-12 | 1.000000 |
| rad54                         | 1.59075e-12 | 1.000000 | 1.59075e-12 | 1.000000 |
| rad43                         | 1.56310e-12 | 1.000000 | 1.56310e-12 | 1.000000 |
| Phenyl+cycC3H4                | 3.96956e-13 | 1.000000 | 0.000000    | 1.000000 |
| rad62                         | 3.49289e-13 | 1.000000 | 3.49289e-13 | 1.000000 |
| PhcycC3H3_B+H                 | 2.54101e-13 | 1.000000 | 2.54101e-13 | 1.000000 |
| rad50                         | 2.42929e-13 | 1.000000 | 2.42929e-13 | 1.000000 |
| rad70                         | 4.55816e-14 | 1.000000 | 4.55816e-14 | 1.000000 |
| PAH1+H                        | 2.06978e-14 | 1.000000 | 2.06978e-14 | 1.000000 |
| rad55                         | 2.02024e-14 | 1.000000 | 2.02024e-14 | 1.000000 |
| rad52                         | 2.38419e-15 | 1.000000 | 2.38419e-15 | 1.000000 |

|           |             |         |             |         |
|-----------|-------------|---------|-------------|---------|
| rad58     | 1.44438e-15 | 1.00000 | 1.44438e-15 | 1.00000 |
| rad34     | 1.15142e-15 | 1.00000 | 1.15142e-15 | 1.00000 |
| rad51     | 9.82815e-16 | 1.00000 | 9.82815e-16 | 1.00000 |
| rad41     | 2.89888e-16 | 1.00000 | 2.89888e-16 | 1.00000 |
| rad42     | 1.85167e-16 | 1.00000 | 1.85167e-16 | 1.00000 |
| rad65     | 2.45506e-17 | 1.00000 | 2.45506e-17 | 1.00000 |
| rad53     | 2.75830e-18 | 1.00000 | 2.75830e-18 | 1.00000 |
| rad64     | 7.36243e-19 | 1.00000 | 7.36243e-19 | 1.00000 |
| rad61     | 1.34204e-19 | 1.00000 | 1.34204e-19 | 1.00000 |
| rad56     | 9.05591e-21 | 1.00000 | 9.05591e-21 | 1.00000 |
| rad68syn  | 1.06496e-21 | 1.00000 | 1.06496e-21 | 1.00000 |
| rad68anti | 8.11646e-22 | 1.00000 | 8.11646e-22 | 1.00000 |
| rad40syn  | 7.73817e-24 | 1.00000 | 7.73817e-24 | 1.00000 |
| rad40anti | 6.20298e-24 | 1.00000 | 6.20298e-24 | 1.00000 |
| PAH8+H    | 9.11871e-25 | 1.00000 | 9.11871e-25 | 1.00000 |
| rad73     | 3.07722e-25 | 1.00000 | 3.07722e-25 | 1.00000 |
| rad71     | 1.53452e-27 | 1.00000 | 1.53452e-27 | 1.00000 |
| rad19anti | 1.83731e-33 | 1.00000 | 1.83731e-33 | 1.00000 |
| rad47     | 8.39990e-35 | 1.00000 | 8.39990e-35 | 1.00000 |
| rad26     | 2.90617e-35 | 1.00000 | 2.90617e-35 | 1.00000 |
| rad6      | 1.73995e-35 | 1.00000 | 1.73995e-35 | 1.00000 |
| rad28     | 6.57465e-36 | 1.00000 | 6.57465e-36 | 1.00000 |
| rad2      | 5.64888e-36 | 1.00000 | 5.64888e-36 | 1.00000 |
| rad10     | 2.67704e-36 | 1.00000 | 2.67704e-36 | 1.00000 |
| rad1      | 3.89447e-37 | 1.00000 | 3.89447e-37 | 1.00000 |
| rad3      | 4.01108e-38 | 1.00000 | 4.01108e-38 | 1.00000 |
| rad14     | 2.47645e-38 | 1.00000 | 2.47645e-38 | 1.00000 |
| rad4      | 2.07235e-38 | 1.00000 | 2.07235e-38 | 1.00000 |
| rad25     | 1.55244e-38 | 1.00000 | 1.55244e-38 | 1.00000 |
| rad31     | 5.54361e-39 | 1.00000 | 5.54361e-39 | 1.00000 |
| rad27     | 3.68298e-39 | 1.00000 | 3.68298e-39 | 1.00000 |
| rad9      | 1.39696e-39 | 1.00000 | 1.39696e-39 | 1.00000 |
| rad7      | 1.29312e-39 | 1.00000 | 1.29312e-39 | 1.00000 |
| rad11     | 3.61541e-40 | 1.00000 | 3.61541e-40 | 1.00000 |
| rad13     | 7.33684e-42 | 1.00000 | 7.33684e-42 | 1.00000 |
| rad19syn  | 2.99699e-42 | 1.00000 | 2.99699e-42 | 1.00000 |
| rad5      | 2.29894e-42 | 1.00000 | 2.29894e-42 | 1.00000 |
| rad33     | 6.74677e-43 | 1.00000 | 6.74677e-43 | 1.00000 |
| rad15     | 6.20580e-43 | 1.00000 | 6.20580e-43 | 1.00000 |
| rad20     | 8.92500e-45 | 1.00000 | 8.92500e-45 | 1.00000 |
| rad21     | 8.14591e-45 | 1.00000 | 8.14591e-45 | 1.00000 |
| rad23     | 4.59144e-45 | 1.00000 | 4.59144e-45 | 1.00000 |
| rad12     | 2.93306e-45 | 1.00000 | 2.93306e-45 | 1.00000 |
| rad45     | 5.06987e-47 | 1.00000 | 5.06987e-47 | 1.00000 |
| rad18     | 2.60440e-47 | 1.00000 | 2.60440e-47 | 1.00000 |
| rad36     | 3.16786e-48 | 1.00000 | 3.16786e-48 | 1.00000 |
| rad24     | 1.30904e-49 | 1.00000 | 1.30904e-49 | 1.00000 |
| rad22     | 5.70966e-50 | 1.00000 | 5.70966e-50 | 1.00000 |
| rad8      | 4.06073e-66 | 1.00000 | 4.06073e-66 | 1.00000 |

0.100000000E-08 Pa, 230.000000 K

| Rate constant             | True (fraction)        | Effective (fraction)   |
|---------------------------|------------------------|------------------------|
| Total                     | 2.20761e-14 (1.00 )    | 2.20761e-14 (1.00 )    |
| Formation of rad19        | 2.20710e-14 (1.000 )   | 2.20710e-14 (1.000 )   |
| H-abstraction to cyc2enyl | 5.13155e-18 (0.000232) | 5.13155e-18 (0.000232) |
| H-abstraction to cyclenyl | 3.75316e-21 (1.70e-07) | 3.75316e-21 (1.70e-07) |

| species                       | PYtrue      | Cumul    | PYeffective | Cumul    |
|-------------------------------|-------------|----------|-------------|----------|
| Indene+H                      | 0.999352    | 0.999352 | 0.999352    | 0.999352 |
| PhCHCCH2+H                    | 0.000392520 | 0.999745 | 0.000392520 | 0.999745 |
| Benzene+cycloprop-2-enylidene | 0.000232448 | 0.999977 | 0.000232448 | 0.999977 |
| PhCCH+CH3                     | 7.03712e-06 | 0.999984 | 7.03712e-06 | 0.999984 |
| C2H2+PhCH2                    | 5.75601e-06 | 0.999990 | 5.75601e-06 | 0.999990 |
| PhCCCH3+H                     | 4.24633e-06 | 0.999994 | 4.24633e-06 | 0.999994 |
| Ph+MeAc                       | 3.67074e-06 | 0.999998 | 3.67074e-06 | 0.999998 |
| rad67                         | 1.07014e-06 | 0.999999 | 1.07014e-06 | 0.999999 |
| rad35                         | 4.58209e-07 | 1.000000 | 4.58209e-07 | 1.000000 |
| Ph+Allene                     | 4.38150e-07 | 1.000000 | 4.38150e-07 | 1.000000 |
| Benzene+cycloprop-1-enylidene | 1.70010e-07 | 1.000000 | 1.70010e-07 | 1.000000 |
| PhCH2CCH+H                    | 6.49255e-08 | 1.000000 | 6.49255e-08 | 1.000000 |
| PAH7+H                        | 4.85973e-08 | 1.000000 | 4.85973e-08 | 1.000000 |
| rad39                         | 1.36916e-08 | 1.000000 | 1.36916e-08 | 1.000000 |
| rad37                         | 1.33953e-08 | 1.000000 | 1.33953e-08 | 1.000000 |
| rad30                         | 8.79825e-09 | 1.000000 | 8.79825e-09 | 1.000000 |
| PAH9+H                        | 7.39444e-10 | 1.000000 | 7.39444e-10 | 1.000000 |
| rad38                         | 3.50209e-10 | 1.000000 | 3.50209e-10 | 1.000000 |
| rad60syn                      | 5.35915e-11 | 1.000000 | 5.35915e-11 | 1.000000 |

|                |             |         |             |         |
|----------------|-------------|---------|-------------|---------|
| PAH10+CH3      | 5.18070e-11 | 1.00000 | 5.18070e-11 | 1.00000 |
| PhcycC3H3_A+H  | 4.10038e-11 | 1.00000 | 4.10038e-11 | 1.00000 |
| PAH3+H         | 3.28545e-11 | 1.00000 | 3.28545e-11 | 1.00000 |
| rad60anti      | 2.69725e-11 | 1.00000 | 2.69725e-11 | 1.00000 |
| rad46          | 2.29232e-11 | 1.00000 | 2.29232e-11 | 1.00000 |
| rad59          | 6.36289e-12 | 1.00000 | 6.36289e-12 | 1.00000 |
| rad54          | 1.88753e-12 | 1.00000 | 1.88753e-12 | 1.00000 |
| rad43          | 1.81040e-12 | 1.00000 | 1.81040e-12 | 1.00000 |
| Phenyl+cycC3H4 | 5.81829e-13 | 1.00000 | 0.00000     | 1.00000 |
| PhcycC3H3_B+H  | 4.18958e-13 | 1.00000 | 4.18958e-13 | 1.00000 |
| rad62          | 4.04844e-13 | 1.00000 | 4.04844e-13 | 1.00000 |
| rad50          | 2.82714e-13 | 1.00000 | 2.82714e-13 | 1.00000 |
| rad70          | 5.67286e-14 | 1.00000 | 5.67286e-14 | 1.00000 |
| PAH1+H         | 2.73412e-14 | 1.00000 | 2.73412e-14 | 1.00000 |
| rad55          | 2.51284e-14 | 1.00000 | 2.51284e-14 | 1.00000 |
| rad52          | 2.88263e-15 | 1.00000 | 2.88263e-15 | 1.00000 |
| rad58          | 1.83842e-15 | 1.00000 | 1.83842e-15 | 1.00000 |
| rad34          | 1.52752e-15 | 1.00000 | 1.52752e-15 | 1.00000 |
| rad51          | 1.24150e-15 | 1.00000 | 1.24150e-15 | 1.00000 |
| rad41          | 3.95307e-16 | 1.00000 | 3.95307e-16 | 1.00000 |
| rad42          | 2.45831e-16 | 1.00000 | 2.45831e-16 | 1.00000 |
| rad65          | 3.15147e-17 | 1.00000 | 3.15147e-17 | 1.00000 |
| rad53          | 4.58652e-18 | 1.00000 | 4.58652e-18 | 1.00000 |
| rad64          | 1.30089e-18 | 1.00000 | 1.30089e-18 | 1.00000 |
| rad61          | 2.85229e-19 | 1.00000 | 2.85229e-19 | 1.00000 |
| rad56          | 2.08059e-20 | 1.00000 | 2.08059e-20 | 1.00000 |
| rad68syn       | 2.52167e-21 | 1.00000 | 2.52167e-21 | 1.00000 |
| rad68anti      | 1.90889e-21 | 1.00000 | 1.90889e-21 | 1.00000 |
| rad40syn       | 2.38315e-23 | 1.00000 | 2.38315e-23 | 1.00000 |
| rad40anti      | 1.90761e-23 | 1.00000 | 1.90761e-23 | 1.00000 |
| PAH8+H         | 3.38041e-24 | 1.00000 | 3.38041e-24 | 1.00000 |
| rad73          | 9.42054e-25 | 1.00000 | 9.42054e-25 | 1.00000 |
| rad71          | 6.14189e-27 | 1.00000 | 6.14189e-27 | 1.00000 |
| rad19anti      | 6.07588e-33 | 1.00000 | 6.07588e-33 | 1.00000 |
| rad47          | 9.27304e-35 | 1.00000 | 9.27304e-35 | 1.00000 |
| rad6           | 6.45039e-35 | 1.00000 | 6.45039e-35 | 1.00000 |
| rad26          | 2.75454e-35 | 1.00000 | 2.75454e-35 | 1.00000 |
| rad28          | 6.17226e-36 | 1.00000 | 6.17226e-36 | 1.00000 |
| rad10          | 4.94486e-36 | 1.00000 | 4.94486e-36 | 1.00000 |
| rad2           | 4.59746e-36 | 1.00000 | 4.59746e-36 | 1.00000 |
| rad1           | 3.20015e-37 | 1.00000 | 3.20015e-37 | 1.00000 |
| rad3           | 4.22015e-38 | 1.00000 | 4.22015e-38 | 1.00000 |
| rad14          | 2.55463e-38 | 1.00000 | 2.55463e-38 | 1.00000 |
| rad4           | 2.18554e-38 | 1.00000 | 2.18554e-38 | 1.00000 |
| rad25          | 1.63650e-38 | 1.00000 | 1.63650e-38 | 1.00000 |
| rad31          | 1.47015e-38 | 1.00000 | 1.47015e-38 | 1.00000 |
| rad7           | 4.79654e-39 | 1.00000 | 4.79654e-39 | 1.00000 |
| rad27          | 3.93483e-39 | 1.00000 | 3.93483e-39 | 1.00000 |
| rad9           | 2.11577e-39 | 1.00000 | 2.11577e-39 | 1.00000 |
| rad11          | 1.16800e-39 | 1.00000 | 1.16800e-39 | 1.00000 |
| rad13          | 2.71974e-41 | 1.00000 | 2.71974e-41 | 1.00000 |
| rad19syn       | 1.11381e-41 | 1.00000 | 1.11381e-41 | 1.00000 |
| rad5           | 2.23621e-42 | 1.00000 | 2.23621e-42 | 1.00000 |
| rad15          | 9.41747e-43 | 1.00000 | 9.41747e-43 | 1.00000 |
| rad33          | 8.42121e-43 | 1.00000 | 8.42121e-43 | 1.00000 |
| rad23          | 1.93673e-44 | 1.00000 | 1.93673e-44 | 1.00000 |
| rad20          | 1.12943e-44 | 1.00000 | 1.12943e-44 | 1.00000 |
| rad21          | 1.04411e-44 | 1.00000 | 1.04411e-44 | 1.00000 |
| rad12          | 5.16751e-45 | 1.00000 | 5.16751e-45 | 1.00000 |
| rad45          | 1.29374e-46 | 1.00000 | 1.29374e-46 | 1.00000 |
| rad18          | 2.90180e-47 | 1.00000 | 2.90180e-47 | 1.00000 |
| rad36          | 8.12442e-48 | 1.00000 | 8.12442e-48 | 1.00000 |
| rad24          | 2.02383e-49 | 1.00000 | 2.02383e-49 | 1.00000 |
| rad22          | 6.08101e-50 | 1.00000 | 6.08101e-50 | 1.00000 |
| rad8           | 7.24167e-66 | 1.00000 | 7.24167e-66 | 1.00000 |

0.100000000E-08 Pa, 240.000000 K

| Rate constant                 | True (fraction)        | Effective (fraction)   |             |          |
|-------------------------------|------------------------|------------------------|-------------|----------|
| Total                         | 2.45462e-14 (1.00 )    | 2.45462e-14 (1.00 )    |             |          |
| Formation of rad19            | 2.45383e-14 (1.000 )   | 2.45383e-14 (1.000 )   |             |          |
| H-abstraction to cyc2enyl     | 7.92234e-18 (0.000323) | 7.92234e-18 (0.000323) |             |          |
| H-abstraction to cyclenyl     | 7.97958e-21 (3.25e-07) | 7.97958e-21 (3.25e-07) |             |          |
| species                       | PYtrue                 | Cumul                  | PYeffective | Cumul    |
| Indene+H                      | 0.999241               | 0.999241               | 0.999241    | 0.999241 |
| PhCHCH2+H                     | 0.000411192            | 0.999652               | 0.000411192 | 0.999652 |
| Benzene+cycloprop-2-enylidene | 0.000322752            | 0.999975               | 0.000322752 | 0.999975 |

|                               |             |          |             |          |
|-------------------------------|-------------|----------|-------------|----------|
| PhCCH+CH3                     | 7.38194e-06 | 0.999982 | 7.38194e-06 | 0.999982 |
| C2H2+PhCH2                    | 6.11553e-06 | 0.999989 | 6.11553e-06 | 0.999989 |
| PhCCCH3+H                     | 4.48334e-06 | 0.999993 | 4.48334e-06 | 0.999993 |
| Ph+MeAc                       | 3.92459e-06 | 0.999997 | 3.92459e-06 | 0.999997 |
| rad67                         | 1.14122e-06 | 0.999998 | 1.14122e-06 | 0.999998 |
| rad35                         | 4.87362e-07 | 0.999999 | 4.87362e-07 | 0.999999 |
| Ph+Allene                     | 4.81641e-07 | 0.999999 | 4.81641e-07 | 0.999999 |
| Benzene+cycloprop-1-enylidene | 3.25084e-07 | 0.999999 | 3.25084e-07 | 0.999999 |
| PhCH2CCH+H                    | 7.25479e-08 | 0.999999 | 7.25479e-08 | 0.999999 |
| PAH7+H                        | 5.26263e-08 | 0.999999 | 5.26263e-08 | 0.999999 |
| rad39                         | 1.48191e-08 | 0.999999 | 1.48191e-08 | 0.999999 |
| rad37                         | 1.45757e-08 | 1.000000 | 1.45757e-08 | 1.000000 |
| rad30                         | 9.38702e-09 | 1.000000 | 9.38702e-09 | 1.000000 |
| PAH9+H                        | 8.06648e-10 | 1.000000 | 8.06648e-10 | 1.000000 |
| rad38                         | 3.86297e-10 | 1.000000 | 3.86297e-10 | 1.000000 |
| PAH10+CH3                     | 6.19064e-11 | 1.000000 | 6.19064e-11 | 1.000000 |
| rad60syn                      | 5.88324e-11 | 1.000000 | 5.88324e-11 | 1.000000 |
| PhcycC3H3_A+H                 | 5.47108e-11 | 1.000000 | 5.47108e-11 | 1.000000 |
| PAH3+H                        | 3.74113e-11 | 1.000000 | 3.74113e-11 | 1.000000 |
| rad60anti                     | 2.96857e-11 | 1.000000 | 2.96857e-11 | 1.000000 |
| rad46                         | 2.54475e-11 | 1.000000 | 2.54475e-11 | 1.000000 |
| rad59                         | 7.20068e-12 | 1.000000 | 7.20068e-12 | 1.000000 |
| rad54                         | 2.25392e-12 | 1.000000 | 2.25392e-12 | 1.000000 |
| rad43                         | 2.10782e-12 | 1.000000 | 2.10782e-12 | 1.000000 |
| Phenyl+cycC3H4                | 8.50545e-13 | 1.000000 | 0.000000    | 1.000000 |
| PhcycC3H3_B+H                 | 6.80482e-13 | 1.000000 | 6.80482e-13 | 1.000000 |
| rad62                         | 4.71505e-13 | 1.000000 | 4.71505e-13 | 1.000000 |
| rad50                         | 3.31266e-13 | 1.000000 | 3.31266e-13 | 1.000000 |
| rad70                         | 7.10727e-14 | 1.000000 | 7.10727e-14 | 1.000000 |
| PAH1+H                        | 3.63163e-14 | 1.000000 | 3.63163e-14 | 1.000000 |
| rad55                         | 3.14580e-14 | 1.000000 | 3.14580e-14 | 1.000000 |
| rad52                         | 3.51289e-15 | 1.000000 | 3.51289e-15 | 1.000000 |
| rad58                         | 2.35637e-15 | 1.000000 | 2.35637e-15 | 1.000000 |
| rad34                         | 2.03779e-15 | 1.000000 | 2.03779e-15 | 1.000000 |
| rad51                         | 1.58177e-15 | 1.000000 | 1.58177e-15 | 1.000000 |
| rad41                         | 5.40331e-16 | 1.000000 | 5.40331e-16 | 1.000000 |
| rad42                         | 3.27191e-16 | 1.000000 | 3.27191e-16 | 1.000000 |
| rad65                         | 4.07884e-17 | 1.000000 | 4.07884e-17 | 1.000000 |
| rad53                         | 7.54386e-18 | 1.000000 | 7.54386e-18 | 1.000000 |
| rad64                         | 2.25729e-18 | 1.000000 | 2.25729e-18 | 1.000000 |
| rad61                         | 5.84088e-19 | 1.000000 | 5.84088e-19 | 1.000000 |
| rad56                         | 4.57232e-20 | 1.000000 | 4.57232e-20 | 1.000000 |
| rad68syn                      | 5.68636e-21 | 1.000000 | 5.68636e-21 | 1.000000 |
| rad68anti                     | 4.27665e-21 | 1.000000 | 4.27665e-21 | 1.000000 |
| rad40syn                      | 6.78314e-23 | 1.000000 | 6.78314e-23 | 1.000000 |
| rad40anti                     | 5.41986e-23 | 1.000000 | 5.41986e-23 | 1.000000 |
| PAH8+H                        | 1.13224e-23 | 1.000000 | 1.13224e-23 | 1.000000 |
| rad73                         | 2.68346e-24 | 1.000000 | 2.68346e-24 | 1.000000 |
| rad71                         | 2.20097e-26 | 1.000000 | 2.20097e-26 | 1.000000 |
| rad19anti                     | 2.07742e-32 | 1.000000 | 2.07742e-32 | 1.000000 |
| rad2                          | 1.33663e-33 | 1.000000 | 1.33663e-33 | 1.000000 |
| rad6                          | 2.60054e-34 | 1.000000 | 2.60054e-34 | 1.000000 |
| rad10                         | 1.33638e-34 | 1.000000 | 1.33638e-34 | 1.000000 |
| rad47                         | 1.03946e-34 | 1.000000 | 1.03946e-34 | 1.000000 |
| rad1                          | 9.40971e-35 | 1.000000 | 9.40971e-35 | 1.000000 |
| rad26                         | 2.61603e-35 | 1.000000 | 2.61603e-35 | 1.000000 |
| rad28                         | 5.80544e-36 | 1.000000 | 5.80544e-36 | 1.000000 |
| rad31                         | 4.04869e-38 | 1.000000 | 4.04869e-38 | 1.000000 |
| rad14                         | 2.64859e-38 | 1.000000 | 2.64859e-38 | 1.000000 |
| rad7                          | 1.93545e-38 | 1.000000 | 1.93545e-38 | 1.000000 |
| rad25                         | 1.73498e-38 | 1.000000 | 1.73498e-38 | 1.000000 |
| rad11                         | 4.47586e-39 | 1.000000 | 4.47586e-39 | 1.000000 |
| rad27                         | 4.23016e-39 | 1.000000 | 4.23016e-39 | 1.000000 |
| rad9                          | 3.27046e-39 | 1.000000 | 3.27046e-39 | 1.000000 |
| rad13                         | 1.09921e-40 | 1.000000 | 1.09921e-40 | 1.000000 |
| rad19syn                      | 4.33470e-41 | 1.000000 | 4.33470e-41 | 1.000000 |
| rad5                          | 2.17913e-42 | 1.000000 | 2.17913e-42 | 1.000000 |
| rad15                         | 1.45875e-42 | 1.000000 | 1.45875e-42 | 1.000000 |
| rad33                         | 1.14797e-42 | 1.000000 | 1.14797e-42 | 1.000000 |
| rad4                          | 4.18303e-43 | 1.000000 | 4.18303e-43 | 1.000000 |
| rad3                          | 3.58160e-43 | 1.000000 | 3.58160e-43 | 1.000000 |
| rad23                         | 8.91248e-44 | 1.000000 | 8.91248e-44 | 1.000000 |
| rad20                         | 1.44655e-44 | 1.000000 | 1.44655e-44 | 1.000000 |
| rad21                         | 1.35542e-44 | 1.000000 | 1.35542e-44 | 1.000000 |
| rad12                         | 9.35191e-45 | 1.000000 | 9.35191e-45 | 1.000000 |
| rad45                         | 2.72660e-46 | 1.000000 | 2.72660e-46 | 1.000000 |
| rad18                         | 3.25238e-47 | 1.000000 | 3.25238e-47 | 1.000000 |
| rad36                         | 1.72148e-47 | 1.000000 | 1.72148e-47 | 1.000000 |
| rad24                         | 3.19415e-49 | 1.000000 | 3.19415e-49 | 1.000000 |
| rad22                         | 6.89454e-50 | 1.000000 | 6.89454e-50 | 1.000000 |

rad8 | 1.31971e-65 1.000000 | 1.31971e-65 1.000000

0.100000000E-08 Pa, 250.000000 K

=====  
Rate constant | True (fraction) | Effective (fraction)  
-----  
Total | 2.71048e-14 (1.00 ) | 2.71048e-14 (1.00 )  
Formation of rad19 | 2.70930e-14 (1.000 ) | 2.70930e-14 (1.000 )  
H-abstraction to cyc2enyl | 1.17991e-17 (0.000435) | 1.17991e-17 (0.000435)  
H-abstraction to cyclenyl | 1.59554e-20 (5.89e-07) | 1.59554e-20 (5.89e-07)

| species                       | PYtrue      | Cumul    | PYeffective | Cumul    |
|-------------------------------|-------------|----------|-------------|----------|
| Indene+H                      | 0.999107    | 0.999107 | 0.999107    | 0.999107 |
| Benzene+cycloprop-2-enylidene | 0.000435312 | 0.999543 | 0.000435312 | 0.999543 |
| PhCHCCH2+H                    | 0.000431584 | 0.999974 | 0.000431584 | 0.999974 |
| PhCCH+CH3                     | 7.75719e-06 | 0.999982 | 7.75719e-06 | 0.999982 |
| C2H2+PhCH2                    | 6.51326e-06 | 0.999988 | 6.51326e-06 | 0.999988 |
| PhCCCH3+H                     | 4.74360e-06 | 0.999993 | 4.74360e-06 | 0.999993 |
| Ph+MeAc                       | 4.20682e-06 | 0.999997 | 4.20682e-06 | 0.999997 |
| rad67                         | 1.22017e-06 | 0.999999 | 1.22017e-06 | 0.999999 |
| Benzene+cycloprop-1-enylidene | 5.88656e-07 | 0.999999 | 5.88656e-07 | 0.999999 |
| Ph+Allene                     | 5.31474e-07 | 1.000000 | 5.31474e-07 | 1.000000 |
| rad35                         | 5.19665e-07 | 1.000000 | 5.19665e-07 | 1.000000 |
| PhCH2CCH+H                    | 8.14215e-08 | 1.000000 | 8.14215e-08 | 1.000000 |
| PAH7+H                        | 5.71717e-08 | 1.000000 | 5.71717e-08 | 1.000000 |
| rad39                         | 1.60894e-08 | 1.000000 | 1.60894e-08 | 1.000000 |
| rad37                         | 1.59138e-08 | 1.000000 | 1.59138e-08 | 1.000000 |
| rad30                         | 1.00427e-08 | 1.000000 | 1.00427e-08 | 1.000000 |
| PAH9+H                        | 8.83301e-10 | 1.000000 | 8.83301e-10 | 1.000000 |
| rad38                         | 4.27984e-10 | 1.000000 | 4.27984e-10 | 1.000000 |
| PAH10+CH3                     | 7.44048e-11 | 1.000000 | 7.44048e-11 | 1.000000 |
| PhcycC3H3_A+H                 | 7.30900e-11 | 1.000000 | 7.30900e-11 | 1.000000 |
| rad60syn                      | 6.48407e-11 | 1.000000 | 6.48407e-11 | 1.000000 |
| PAH3+H                        | 4.28259e-11 | 1.000000 | 4.28259e-11 | 1.000000 |
| rad60anti                     | 3.28040e-11 | 1.000000 | 3.28040e-11 | 1.000000 |
| rad46                         | 2.83782e-11 | 1.000000 | 2.83782e-11 | 1.000000 |
| rad59                         | 8.18974e-12 | 1.000000 | 8.18974e-12 | 1.000000 |
| rad54                         | 2.70728e-12 | 1.000000 | 2.70728e-12 | 1.000000 |
| rad43                         | 2.46610e-12 | 1.000000 | 2.46610e-12 | 1.000000 |
| Phenyl+cycC3H4                | 1.23952e-12 | 1.000000 | 0.000000    | 1.000000 |
| PhcycC3H3_B+H                 | 1.09005e-12 | 1.000000 | 1.09005e-12 | 1.000000 |
| rad62                         | 5.51586e-13 | 1.000000 | 5.51586e-13 | 1.000000 |
| rad50                         | 3.90700e-13 | 1.000000 | 3.90700e-13 | 1.000000 |
| rad70                         | 8.95708e-14 | 1.000000 | 8.95708e-14 | 1.000000 |
| PAH1+H                        | 4.84545e-14 | 1.000000 | 4.84545e-14 | 1.000000 |
| rad55                         | 3.96080e-14 | 1.000000 | 3.96080e-14 | 1.000000 |
| rad52                         | 4.31279e-15 | 1.000000 | 4.31279e-15 | 1.000000 |
| rad58                         | 3.03881e-15 | 1.000000 | 3.03881e-15 | 1.000000 |
| rad34                         | 2.73087e-15 | 1.000000 | 2.73087e-15 | 1.000000 |
| rad51                         | 2.03107e-15 | 1.000000 | 2.03107e-15 | 1.000000 |
| rad41                         | 7.39638e-16 | 1.000000 | 7.39638e-16 | 1.000000 |
| rad42                         | 4.36203e-16 | 1.000000 | 4.36203e-16 | 1.000000 |
| rad65                         | 5.31796e-17 | 1.000000 | 5.31796e-17 | 1.000000 |
| rad53                         | 1.22797e-17 | 1.000000 | 1.22797e-17 | 1.000000 |
| rad64                         | 3.85188e-18 | 1.000000 | 3.85188e-18 | 1.000000 |
| rad61                         | 1.15688e-18 | 1.000000 | 1.15688e-18 | 1.000000 |
| rad56                         | 9.65553e-20 | 1.000000 | 9.65553e-20 | 1.000000 |
| rad68syn                      | 1.22760e-20 | 1.000000 | 1.22760e-20 | 1.000000 |
| rad68anti                     | 9.17629e-21 | 1.000000 | 9.17629e-21 | 1.000000 |
| rad40syn                      | 1.79832e-22 | 1.000000 | 1.79832e-22 | 1.000000 |
| rad40anti                     | 1.43402e-22 | 1.000000 | 1.43402e-22 | 1.000000 |
| PAH8+H                        | 3.45930e-23 | 1.000000 | 3.45930e-23 | 1.000000 |
| rad73                         | 7.15481e-24 | 1.000000 | 7.15481e-24 | 1.000000 |
| rad71                         | 7.13356e-26 | 1.000000 | 7.13356e-26 | 1.000000 |
| rad19anti                     | 7.31047e-32 | 1.000000 | 7.31047e-32 | 1.000000 |
| rad2                          | 1.31360e-33 | 1.000000 | 1.31360e-33 | 1.000000 |
| rad6                          | 1.07693e-33 | 1.000000 | 1.07693e-33 | 1.000000 |
| rad10                         | 2.27417e-34 | 1.000000 | 2.27417e-34 | 1.000000 |
| rad47                         | 1.18402e-34 | 1.000000 | 1.18402e-34 | 1.000000 |
| rad1                          | 9.35082e-35 | 1.000000 | 9.35082e-35 | 1.000000 |
| rad26                         | 2.48966e-35 | 1.000000 | 2.48966e-35 | 1.000000 |
| rad28                         | 5.47337e-36 | 1.000000 | 5.47337e-36 | 1.000000 |
| rad31                         | 1.15495e-37 | 1.000000 | 1.15495e-37 | 1.000000 |
| rad7                          | 8.02084e-38 | 1.000000 | 8.02084e-38 | 1.000000 |
| rad14                         | 2.75981e-38 | 1.000000 | 2.75981e-38 | 1.000000 |
| rad25                         | 1.84990e-38 | 1.000000 | 1.84990e-38 | 1.000000 |
| rad11                         | 1.81368e-38 | 1.000000 | 1.81368e-38 | 1.000000 |
| rad9                          | 5.16189e-39 | 1.000000 | 5.16189e-39 | 1.000000 |
| rad27                         | 4.57607e-39 | 1.000000 | 4.57607e-39 | 1.000000 |



|          |             |         |             |         |
|----------|-------------|---------|-------------|---------|
| rad13    | 4.56717e-40 | 1.00000 | 4.56717e-40 | 1.00000 |
| rad19syn | 1.76219e-40 | 1.00000 | 1.76219e-40 | 1.00000 |
| rad15    | 2.30743e-42 | 1.00000 | 2.30743e-42 | 1.00000 |
| rad5     | 2.12699e-42 | 1.00000 | 2.12699e-42 | 1.00000 |
| rad33    | 1.91935e-42 | 1.00000 | 1.91935e-42 | 1.00000 |
| rad4     | 6.49527e-43 | 1.00000 | 6.49527e-43 | 1.00000 |
| rad3     | 5.29707e-43 | 1.00000 | 5.29707e-43 | 1.00000 |
| rad23    | 4.34904e-43 | 1.00000 | 4.34904e-43 | 1.00000 |
| rad20    | 1.87553e-44 | 1.00000 | 1.87553e-44 | 1.00000 |
| rad21    | 1.78251e-44 | 1.00000 | 1.78251e-44 | 1.00000 |
| rad12    | 1.73959e-44 | 1.00000 | 1.73959e-44 | 1.00000 |
| rad45    | 2.03084e-45 | 1.00000 | 2.03084e-45 | 1.00000 |
| rad36    | 1.28880e-46 | 1.00000 | 1.28880e-46 | 1.00000 |
| rad18    | 3.66681e-47 | 1.00000 | 3.66681e-47 | 1.00000 |
| rad24    | 5.14887e-49 | 1.00000 | 5.14887e-49 | 1.00000 |
| rad22    | 9.42842e-50 | 1.00000 | 9.42842e-50 | 1.00000 |
| rad8     | 2.45880e-65 | 1.00000 | 2.45880e-65 | 1.00000 |

0.100000000E-08 Pa, 260.000000 K

| Rate constant             | True (fraction)        | Effective (fraction)   |
|---------------------------|------------------------|------------------------|
| Total                     | 2.97464e-14 (1.00 )    | 2.97464e-14 (1.00 )    |
| Formation of rad19        | 2.97293e-14 (0.999 )   | 2.97293e-14 (0.999 )   |
| H-abstraction to cyc2enyl | 1.70236e-17 (0.000572) | 1.70236e-17 (0.000572) |
| H-abstraction to cyclenyl | 3.02186e-20 (1.02e-06) | 3.02186e-20 (1.02e-06) |

| species                       | PYtrue      | Cumul    | PYeffective | Cumul    |
|-------------------------------|-------------|----------|-------------|----------|
| Indene+H                      | 0.998946    | 0.998946 | 0.998946    | 0.998946 |
| Benzene+cycloprop-2-enylidene | 0.000572291 | 0.999518 | 0.000572291 | 0.999518 |
| PhCHCCH2+H                    | 0.000453848 | 0.999972 | 0.000453848 | 0.999972 |
| PhCCH+CH3                     | 8.16530e-06 | 0.999980 | 8.16530e-06 | 0.999980 |
| C2H2+PhCH2                    | 6.95321e-06 | 0.999987 | 6.95321e-06 | 0.999987 |
| PhCCCH3+H                     | 5.02932e-06 | 0.999992 | 5.02932e-06 | 0.999992 |
| Ph+MeAc                       | 4.52059e-06 | 0.999997 | 4.52059e-06 | 0.999997 |
| rad67                         | 1.30786e-06 | 0.999998 | 1.30786e-06 | 0.999998 |
| Benzene+cycloprop-1-enylidene | 1.01588e-06 | 0.999999 | 1.01588e-06 | 0.999999 |
| Ph+Allene                     | 5.88618e-07 | 1.000000 | 5.88618e-07 | 1.000000 |
| rad35                         | 5.55458e-07 | 1.000000 | 5.55458e-07 | 1.000000 |
| PhCH2CCH+H                    | 9.17637e-08 | 1.000000 | 9.17637e-08 | 1.000000 |
| PAH7+H                        | 6.23016e-08 | 1.000000 | 6.23016e-08 | 1.000000 |
| rad39                         | 1.75209e-08 | 1.000000 | 1.75209e-08 | 1.000000 |
| rad37                         | 1.74317e-08 | 1.000000 | 1.74317e-08 | 1.000000 |
| rad30                         | 1.07732e-08 | 1.000000 | 1.07732e-08 | 1.000000 |
| PAH9+H                        | 9.70823e-10 | 1.000000 | 9.70823e-10 | 1.000000 |
| rad38                         | 4.76210e-10 | 1.000000 | 4.76210e-10 | 1.000000 |
| PhcycC3H3_A+H                 | 9.76900e-11 | 1.000000 | 9.76900e-11 | 1.000000 |
| PAH10+CH3                     | 8.98996e-11 | 1.000000 | 8.98996e-11 | 1.000000 |
| rad60syn                      | 7.17361e-11 | 1.000000 | 7.17361e-11 | 1.000000 |
| PAH3+H                        | 4.92719e-11 | 1.000000 | 4.92719e-11 | 1.000000 |
| rad60anti                     | 3.63918e-11 | 1.000000 | 3.63918e-11 | 1.000000 |
| rad46                         | 3.17862e-11 | 1.000000 | 3.17862e-11 | 1.000000 |
| rad59                         | 9.35934e-12 | 1.000000 | 9.35934e-12 | 1.000000 |
| rad54                         | 3.26922e-12 | 1.000000 | 3.26922e-12 | 1.000000 |
| rad43                         | 2.89822e-12 | 1.000000 | 2.89822e-12 | 1.000000 |
| Phenyl+cycC3H4                | 1.79997e-12 | 1.000000 | 0.000000    | 1.000000 |
| PhcycC3H3_B+H                 | 1.72357e-12 | 1.000000 | 1.72357e-12 | 1.000000 |
| rad62                         | 6.47858e-13 | 1.000000 | 6.47858e-13 | 1.000000 |
| rad50                         | 4.63657e-13 | 1.000000 | 4.63657e-13 | 1.000000 |
| rad70                         | 1.13462e-13 | 1.000000 | 1.13462e-13 | 1.000000 |
| PAH1+H                        | 6.48747e-14 | 1.000000 | 6.48747e-14 | 1.000000 |
| rad55                         | 5.01162e-14 | 1.000000 | 5.01162e-14 | 1.000000 |
| rad52                         | 5.33110e-15 | 1.000000 | 5.33110e-15 | 1.000000 |
| rad58                         | 3.93954e-15 | 1.000000 | 3.93954e-15 | 1.000000 |
| rad34                         | 3.67253e-15 | 1.000000 | 3.67253e-15 | 1.000000 |
| rad51                         | 2.62615e-15 | 1.000000 | 2.62615e-15 | 1.000000 |
| rad41                         | 1.01308e-15 | 1.000000 | 1.01308e-15 | 1.000000 |
| rad42                         | 5.82033e-16 | 1.000000 | 5.82033e-16 | 1.000000 |
| rad65                         | 6.97793e-17 | 1.000000 | 6.97793e-17 | 1.000000 |
| rad53                         | 1.97860e-17 | 1.000000 | 1.97860e-17 | 1.000000 |
| rad64                         | 6.46999e-18 | 1.000000 | 6.46999e-18 | 1.000000 |
| rad61                         | 2.22252e-18 | 1.000000 | 2.22252e-18 | 1.000000 |
| rad56                         | 1.96583e-19 | 1.000000 | 1.96583e-19 | 1.000000 |
| rad68syn                      | 2.54704e-20 | 1.000000 | 2.54704e-20 | 1.000000 |
| rad68anti                     | 1.89312e-20 | 1.000000 | 1.89312e-20 | 1.000000 |
| rad40syn                      | 4.46797e-22 | 1.000000 | 4.46797e-22 | 1.000000 |
| rad40anti                     | 3.55555e-22 | 1.000000 | 3.55555e-22 | 1.000000 |
| PAH8+H                        | 9.71820e-23 | 1.000000 | 9.71820e-23 | 1.000000 |
| rad73                         | 1.79367e-23 | 1.000000 | 1.79367e-23 | 1.000000 |

|           |             |         |             |         |
|-----------|-------------|---------|-------------|---------|
| rad71     | 2.10958e-25 | 1.00000 | 2.10958e-25 | 1.00000 |
| rad19anti | 2.63449e-31 | 1.00000 | 2.63449e-31 | 1.00000 |
| rad6      | 4.51315e-33 | 1.00000 | 4.51315e-33 | 1.00000 |
| rad2      | 1.13344e-33 | 1.00000 | 1.13344e-33 | 1.00000 |
| rad10     | 4.14771e-34 | 1.00000 | 4.14771e-34 | 1.00000 |
| rad47     | 1.37151e-34 | 1.00000 | 1.37151e-34 | 1.00000 |
| rad1      | 8.16233e-35 | 1.00000 | 8.16233e-35 | 1.00000 |
| rad26     | 2.37532e-35 | 1.00000 | 2.37532e-35 | 1.00000 |
| rad28     | 5.18048e-36 | 1.00000 | 5.18048e-36 | 1.00000 |
| rad31     | 3.40261e-37 | 1.00000 | 3.40261e-37 | 1.00000 |
| rad7      | 3.36260e-37 | 1.00000 | 3.36260e-37 | 1.00000 |
| rad11     | 7.49165e-38 | 1.00000 | 7.49165e-38 | 1.00000 |
| rad14     | 2.89012e-38 | 1.00000 | 2.89012e-38 | 1.00000 |
| rad25     | 1.98379e-38 | 1.00000 | 1.98379e-38 | 1.00000 |
| rad9      | 8.32340e-39 | 1.00000 | 8.32340e-39 | 1.00000 |
| rad27     | 4.98146e-39 | 1.00000 | 4.98146e-39 | 1.00000 |
| rad13     | 1.92069e-39 | 1.00000 | 1.92069e-39 | 1.00000 |
| rad19syn  | 7.46104e-40 | 1.00000 | 7.46104e-40 | 1.00000 |
| rad33     | 4.48233e-42 | 1.00000 | 4.48233e-42 | 1.00000 |
| rad15     | 3.72923e-42 | 1.00000 | 3.72923e-42 | 1.00000 |
| rad23     | 2.24639e-42 | 1.00000 | 2.24639e-42 | 1.00000 |
| rad5      | 2.07928e-42 | 1.00000 | 2.07928e-42 | 1.00000 |
| rad4      | 1.12232e-42 | 1.00000 | 1.12232e-42 | 1.00000 |
| rad3      | 8.67855e-43 | 1.00000 | 8.67855e-43 | 1.00000 |
| rad12     | 3.32818e-44 | 1.00000 | 3.32818e-44 | 1.00000 |
| rad20     | 2.46234e-44 | 1.00000 | 2.46234e-44 | 1.00000 |
| rad21     | 2.37546e-44 | 1.00000 | 2.37546e-44 | 1.00000 |
| rad45     | 6.01778e-45 | 1.00000 | 6.01778e-45 | 1.00000 |
| rad36     | 3.83868e-46 | 1.00000 | 3.83868e-46 | 1.00000 |
| rad18     | 4.15863e-47 | 1.00000 | 4.15863e-47 | 1.00000 |
| rad24     | 8.48173e-49 | 1.00000 | 8.48173e-49 | 1.00000 |
| rad22     | 1.92665e-49 | 1.00000 | 1.92665e-49 | 1.00000 |
| rad8      | 4.68586e-65 | 1.00000 | 4.68586e-65 | 1.00000 |

0.100000000E-08 Pa, 270.000000 K

=====

| Rate constant             | True (fraction)        | Effective (fraction)   |
|---------------------------|------------------------|------------------------|
| Total                     | 3.24655e-14 (1.00 )    | 3.24655e-14 (1.00 )    |
| Formation of rad19        | 3.24415e-14 (0.999 )   | 3.24415e-14 (0.999 )   |
| H-abstraction to cyc2enyl | 2.38790e-17 (0.000736) | 2.38790e-17 (0.000736) |
| H-abstraction to cyclenyl | 5.45397e-20 (1.68e-06) | 5.45397e-20 (1.68e-06) |

| species                       | PYtrue      | Cumul    | PYeffective | Cumul    |
|-------------------------------|-------------|----------|-------------|----------|
| Indene+H                      | 0.998755    | 0.998755 | 0.998755    | 0.998755 |
| Benzene+cycloprop-2-enylidene | 0.000735519 | 0.999491 | 0.000735519 | 0.999491 |
| PhCHCCH2+H                    | 0.000478146 | 0.999969 | 0.000478146 | 0.999969 |
| PhCCH+CH3                     | 8.60880e-06 | 0.999977 | 8.60880e-06 | 0.999977 |
| C2H2+PhCH2                    | 7.43973e-06 | 0.999985 | 7.43973e-06 | 0.999985 |
| PhCCH3+H                      | 5.34286e-06 | 0.999990 | 5.34286e-06 | 0.999990 |
| Ph+MeAc                       | 4.86938e-06 | 0.999995 | 4.86938e-06 | 0.999995 |
| Benzene+cycloprop-1-enylidene | 1.67993e-06 | 0.999997 | 1.67993e-06 | 0.999997 |
| rad67                         | 1.40525e-06 | 0.999998 | 1.40525e-06 | 0.999998 |
| Ph+Allene                     | 6.54187e-07 | 0.999999 | 6.54187e-07 | 0.999999 |
| rad35                         | 5.95116e-07 | 0.999999 | 5.95116e-07 | 0.999999 |
| PhCH2CCH+H                    | 1.03828e-07 | 1.000000 | 1.03828e-07 | 1.000000 |
| PAH7+H                        | 6.80924e-08 | 1.000000 | 6.80924e-08 | 1.000000 |
| rad37                         | 1.91542e-08 | 1.000000 | 1.91542e-08 | 1.000000 |
| rad39                         | 1.91343e-08 | 1.000000 | 1.91343e-08 | 1.000000 |
| rad30                         | 1.15872e-08 | 1.000000 | 1.15872e-08 | 1.000000 |
| PAH9+H                        | 1.07084e-09 | 1.000000 | 1.07084e-09 | 1.000000 |
| rad38                         | 5.32069e-10 | 1.000000 | 5.32069e-10 | 1.000000 |
| PhcycC3H3_A+H                 | 1.30538e-10 | 1.000000 | 1.30538e-10 | 1.000000 |
| PAH10+CH3                     | 1.09134e-10 | 1.000000 | 1.09134e-10 | 1.000000 |
| rad60syn                      | 7.96566e-11 | 1.000000 | 7.96566e-11 | 1.000000 |
| PAH3+H                        | 5.69580e-11 | 1.000000 | 5.69580e-11 | 1.000000 |
| rad60anti                     | 4.05238e-11 | 1.000000 | 4.05238e-11 | 1.000000 |
| rad46                         | 3.57543e-11 | 1.000000 | 3.57543e-11 | 1.000000 |
| rad59                         | 1.07444e-11 | 1.000000 | 1.07444e-11 | 1.000000 |
| rad54                         | 3.96666e-12 | 1.000000 | 3.96666e-12 | 1.000000 |
| rad43                         | 3.41976e-12 | 1.000000 | 3.41976e-12 | 1.000000 |
| PhcycC3H3_B+H                 | 2.69151e-12 | 1.000000 | 2.69151e-12 | 1.000000 |
| Phenyl+cycC3H4                | 2.60320e-12 | 1.000000 | 0.00000     | 1.000000 |
| rad62                         | 7.63634e-13 | 1.000000 | 7.63634e-13 | 1.000000 |
| rad50                         | 5.53420e-13 | 1.000000 | 5.53420e-13 | 1.000000 |
| rad70                         | 1.44343e-13 | 1.000000 | 1.44343e-13 | 1.000000 |
| PAH1+H                        | 8.70739e-14 | 1.000000 | 8.70739e-14 | 1.000000 |
| rad55                         | 6.36740e-14 | 1.000000 | 6.36740e-14 | 1.000000 |
| rad52                         | 6.63065e-15 | 1.000000 | 6.63065e-15 | 1.000000 |

|           |             |          |             |          |
|-----------|-------------|----------|-------------|----------|
| rad58     | 5.12944e-15 | 1.000000 | 5.12944e-15 | 1.000000 |
| rad34     | 4.95119e-15 | 1.000000 | 4.95119e-15 | 1.000000 |
| rad51     | 3.41605e-15 | 1.000000 | 3.41605e-15 | 1.000000 |
| rad41     | 1.38732e-15 | 1.000000 | 1.38732e-15 | 1.000000 |
| rad42     | 7.76679e-16 | 1.000000 | 7.76679e-16 | 1.000000 |
| rad65     | 9.20538e-17 | 1.000000 | 9.20538e-17 | 1.000000 |
| rad53     | 3.15550e-17 | 1.000000 | 3.15550e-17 | 1.000000 |
| rad64     | 1.07030e-17 | 1.000000 | 1.07030e-17 | 1.000000 |
| rad61     | 4.14942e-18 | 1.000000 | 4.14942e-18 | 1.000000 |
| rad56     | 3.86758e-19 | 1.000000 | 3.86758e-19 | 1.000000 |
| rad68syn  | 5.09279e-20 | 1.000000 | 5.09279e-20 | 1.000000 |
| rad68anti | 3.76574e-20 | 1.000000 | 3.76574e-20 | 1.000000 |
| rad40syn  | 1.04541e-21 | 1.000000 | 1.04541e-21 | 1.000000 |
| rad40anti | 8.30243e-22 | 1.000000 | 8.30243e-22 | 1.000000 |
| PAH8+H    | 2.52772e-22 | 1.000000 | 2.52772e-22 | 1.000000 |
| rad73     | 4.24308e-23 | 1.000000 | 4.24308e-23 | 1.000000 |
| rad71     | 5.73649e-25 | 1.000000 | 5.73649e-25 | 1.000000 |
| rad19anti | 9.66950e-31 | 1.000000 | 9.66950e-31 | 1.000000 |
| rad6      | 1.88964e-32 | 1.000000 | 1.88964e-32 | 1.000000 |
| rad2      | 3.64929e-33 | 1.000000 | 3.64929e-33 | 1.000000 |
| rad10     | 8.02368e-34 | 1.000000 | 8.02368e-34 | 1.000000 |
| rad1      | 2.66588e-34 | 1.000000 | 2.66588e-34 | 1.000000 |
| rad47     | 1.61683e-34 | 1.000000 | 1.61683e-34 | 1.000000 |
| rad26     | 2.27428e-35 | 1.000000 | 2.27428e-35 | 1.000000 |
| rad28     | 4.94365e-36 | 1.000000 | 4.94365e-36 | 1.000000 |
| rad7      | 1.40776e-36 | 1.000000 | 1.40776e-36 | 1.000000 |
| rad31     | 1.03174e-36 | 1.000000 | 1.03174e-36 | 1.000000 |
| rad11     | 3.09378e-37 | 1.000000 | 3.09378e-37 | 1.000000 |
| rad14     | 3.04194e-38 | 1.000000 | 3.04194e-38 | 1.000000 |
| rad25     | 2.13978e-38 | 1.000000 | 2.13978e-38 | 1.000000 |
| rad9      | 1.37206e-38 | 1.000000 | 1.37206e-38 | 1.000000 |
| rad13     | 8.06953e-39 | 1.000000 | 8.06953e-39 | 1.000000 |
| rad27     | 5.45750e-39 | 1.000000 | 5.45750e-39 | 1.000000 |
| rad19syn  | 3.27847e-39 | 1.000000 | 3.27847e-39 | 1.000000 |
| rad33     | 1.42148e-41 | 1.000000 | 1.42148e-41 | 1.000000 |
| rad23     | 1.21694e-41 | 1.000000 | 1.21694e-41 | 1.000000 |
| rad15     | 6.16214e-42 | 1.000000 | 6.16214e-42 | 1.000000 |
| rad4      | 2.06620e-42 | 1.000000 | 2.06620e-42 | 1.000000 |
| rad5      | 2.03557e-42 | 1.000000 | 2.03557e-42 | 1.000000 |
| rad3      | 1.50230e-42 | 1.000000 | 1.50230e-42 | 1.000000 |
| rad12     | 6.55354e-44 | 1.000000 | 6.55354e-44 | 1.000000 |
| rad45     | 6.23755e-44 | 1.000000 | 6.23755e-44 | 1.000000 |
| rad20     | 3.27459e-44 | 1.000000 | 3.27459e-44 | 1.000000 |
| rad21     | 3.20911e-44 | 1.000000 | 3.20911e-44 | 1.000000 |
| rad36     | 4.00869e-45 | 1.000000 | 4.00869e-45 | 1.000000 |
| rad18     | 4.74563e-47 | 1.000000 | 4.74563e-47 | 1.000000 |
| rad24     | 1.42867e-48 | 1.000000 | 1.42867e-48 | 1.000000 |
| rad22     | 6.19170e-49 | 1.000000 | 6.19170e-49 | 1.000000 |
| rad8      | 9.13967e-65 | 1.000000 | 9.13967e-65 | 1.000000 |

0.100000000E-08 Pa, 280.000000 K

=====

| Rate constant             | True (fraction)        | Effective (fraction)   |
|---------------------------|------------------------|------------------------|
| Total                     | 3.52572e-14 (1.00 )    | 3.52572e-14 (1.00 )    |
| Formation of rad19        | 3.52244e-14 (0.999 )   | 3.52244e-14 (0.999 )   |
| H-abstraction to cyc2enyl | 3.26639e-17 (0.000926) | 3.26639e-17 (0.000926) |
| H-abstraction to cyclenyl | 9.42926e-20 (2.67e-06) | 9.42926e-20 (2.67e-06) |

| species                       | PYtrue      | Cumul    | PYeffective | Cumul    |
|-------------------------------|-------------|----------|-------------|----------|
| Indene+H                      | 0.998535    | 0.998535 | 0.998535    | 0.998535 |
| Benzene+cycloprop-2-enylidene | 0.000926445 | 0.999462 | 0.000926445 | 0.999462 |
| PhCHCCH2+H                    | 0.000504654 | 0.999966 | 0.000504654 | 0.999966 |
| PhCCH+CH3                     | 9.09038e-06 | 0.999976 | 9.09038e-06 | 0.999976 |
| C2H2+PhCH2                    | 7.97755e-06 | 0.999984 | 7.97755e-06 | 0.999984 |
| PhCCCH3+H                     | 5.68676e-06 | 0.999989 | 5.68676e-06 | 0.999989 |
| Ph+MeAc                       | 5.25697e-06 | 0.999994 | 5.25697e-06 | 0.999994 |
| Benzene+cycloprop-1-enylidene | 2.67442e-06 | 0.999997 | 2.67442e-06 | 0.999997 |
| rad67                         | 1.51340e-06 | 0.999999 | 1.51340e-06 | 0.999999 |
| Ph+Allene                     | 7.29448e-07 | 0.999999 | 7.29448e-07 | 0.999999 |
| rad35                         | 6.39046e-07 | 1.00000  | 6.39046e-07 | 1.00000  |
| PhCH2CCH+H                    | 1.17909e-07 | 1.00000  | 1.17909e-07 | 1.00000  |
| PAH7+H                        | 7.46290e-08 | 1.00000  | 7.46290e-08 | 1.00000  |
| rad37                         | 2.11094e-08 | 1.00000  | 2.11094e-08 | 1.00000  |
| rad39                         | 2.09522e-08 | 1.00000  | 2.09522e-08 | 1.00000  |
| rad30                         | 1.24940e-08 | 1.00000  | 1.24940e-08 | 1.00000  |
| PAH9+H                        | 1.18522e-09 | 1.00000  | 1.18522e-09 | 1.00000  |
| rad38                         | 5.96837e-10 | 1.00000  | 5.96837e-10 | 1.00000  |
| PhcycC3H3_A+H                 | 1.74264e-10 | 1.00000  | 1.74264e-10 | 1.00000  |

|                |             |         |             |         |
|----------------|-------------|---------|-------------|---------|
| PAH10+CH3      | 1.33029e-10 | 1.00000 | 1.33029e-10 | 1.00000 |
| rad60syn       | 8.87606e-11 | 1.00000 | 8.87606e-11 | 1.00000 |
| PAH3+H         | 6.61334e-11 | 1.00000 | 6.61334e-11 | 1.00000 |
| rad60anti      | 4.52857e-11 | 1.00000 | 4.52857e-11 | 1.00000 |
| rad46          | 4.03796e-11 | 1.00000 | 4.03796e-11 | 1.00000 |
| rad59          | 1.23862e-11 | 1.00000 | 1.23862e-11 | 1.00000 |
| rad54          | 4.83285e-12 | 1.00000 | 4.83285e-12 | 1.00000 |
| PhcycC3H3_B+H  | 4.15199e-12 | 1.00000 | 4.15199e-12 | 1.00000 |
| rad43          | 4.04946e-12 | 1.00000 | 4.04946e-12 | 1.00000 |
| Phenyl+cycC3H4 | 3.74742e-12 | 1.00000 | 0.00000     | 1.00000 |
| rad62          | 9.02853e-13 | 1.00000 | 9.02853e-13 | 1.00000 |
| rad50          | 6.64061e-13 | 1.00000 | 6.64061e-13 | 1.00000 |
| rad70          | 1.84259e-13 | 1.00000 | 1.84259e-13 | 1.00000 |
| PAH1+H         | 1.17039e-13 | 1.00000 | 1.17039e-13 | 1.00000 |
| rad55          | 8.11651e-14 | 1.00000 | 8.11651e-14 | 1.00000 |
| rad52          | 8.29198e-15 | 1.00000 | 8.29198e-15 | 1.00000 |
| rad58          | 6.70136e-15 | 1.00000 | 6.70136e-15 | 1.00000 |
| rad34          | 6.68467e-15 | 1.00000 | 6.68467e-15 | 1.00000 |
| rad51          | 4.46577e-15 | 1.00000 | 4.46577e-15 | 1.00000 |
| rad41          | 1.89783e-15 | 1.00000 | 1.89783e-15 | 1.00000 |
| rad42          | 1.03572e-15 | 1.00000 | 1.03572e-15 | 1.00000 |
| rad65          | 1.21961e-16 | 1.00000 | 1.21961e-16 | 1.00000 |
| rad53          | 4.97919e-17 | 1.00000 | 4.97919e-17 | 1.00000 |
| rad64          | 1.74396e-17 | 1.00000 | 1.74396e-17 | 1.00000 |
| rad61          | 7.53772e-18 | 1.00000 | 7.53772e-18 | 1.00000 |
| rad56          | 7.36384e-19 | 1.00000 | 7.36384e-19 | 1.00000 |
| rad68syn       | 9.83169e-20 | 1.00000 | 9.83169e-20 | 1.00000 |
| rad68anti      | 7.23595e-20 | 1.00000 | 7.23595e-20 | 1.00000 |
| rad40syn       | 2.31284e-21 | 1.00000 | 2.31284e-21 | 1.00000 |
| rad40anti      | 1.83329e-21 | 1.00000 | 1.83329e-21 | 1.00000 |
| PAH8+H         | 6.12419e-22 | 1.00000 | 6.12419e-22 | 1.00000 |
| rad73          | 9.50003e-23 | 1.00000 | 9.50003e-23 | 1.00000 |
| rad71          | 1.44434e-24 | 1.00000 | 1.44434e-24 | 1.00000 |
| rad19anti      | 3.59338e-30 | 1.00000 | 3.59338e-30 | 1.00000 |
| rad6           | 7.82987e-32 | 1.00000 | 7.82987e-32 | 1.00000 |
| rad2           | 6.23344e-33 | 1.00000 | 6.23344e-33 | 1.00000 |
| rad10          | 1.63378e-33 | 1.00000 | 1.63378e-33 | 1.00000 |
| rad1           | 4.61478e-34 | 1.00000 | 4.61478e-34 | 1.00000 |
| rad47          | 1.94125e-34 | 1.00000 | 1.94125e-34 | 1.00000 |
| rad26          | 2.19061e-35 | 1.00000 | 2.19061e-35 | 1.00000 |
| rad7           | 5.82902e-36 | 1.00000 | 5.82902e-36 | 1.00000 |
| rad28          | 4.81133e-36 | 1.00000 | 4.81133e-36 | 1.00000 |
| rad31          | 3.20736e-36 | 1.00000 | 3.20736e-36 | 1.00000 |
| rad11          | 1.26279e-36 | 1.00000 | 1.26279e-36 | 1.00000 |
| rad13          | 3.35458e-38 | 1.00000 | 3.35458e-38 | 1.00000 |
| rad14          | 3.21825e-38 | 1.00000 | 3.21825e-38 | 1.00000 |
| rad25          | 2.32179e-38 | 1.00000 | 2.32179e-38 | 1.00000 |
| rad9           | 2.31421e-38 | 1.00000 | 2.31421e-38 | 1.00000 |
| rad19syn       | 1.48909e-38 | 1.00000 | 1.48909e-38 | 1.00000 |
| rad27          | 6.01828e-39 | 1.00000 | 6.01828e-39 | 1.00000 |
| rad23          | 6.97072e-41 | 1.00000 | 6.97072e-41 | 1.00000 |
| rad33          | 5.25958e-41 | 1.00000 | 5.25958e-41 | 1.00000 |
| rad15          | 1.04194e-41 | 1.00000 | 1.04194e-41 | 1.00000 |
| rad4           | 4.09322e-42 | 1.00000 | 4.09322e-42 | 1.00000 |
| rad3           | 2.77003e-42 | 1.00000 | 2.77003e-42 | 1.00000 |
| rad5           | 1.99557e-42 | 1.00000 | 1.99557e-42 | 1.00000 |
| rad45          | 2.30561e-43 | 1.00000 | 2.30561e-43 | 1.00000 |
| rad12          | 1.32907e-43 | 1.00000 | 1.32907e-43 | 1.00000 |
| rad20          | 4.41341e-44 | 1.00000 | 4.41341e-44 | 1.00000 |
| rad21          | 4.39705e-44 | 1.00000 | 4.39705e-44 | 1.00000 |
| rad36          | 1.48989e-44 | 1.00000 | 1.48989e-44 | 1.00000 |
| rad18          | 5.45315e-47 | 1.00000 | 5.45315e-47 | 1.00000 |
| rad22          | 2.58583e-48 | 1.00000 | 2.58583e-48 | 1.00000 |
| rad24          | 2.46218e-48 | 1.00000 | 2.46218e-48 | 1.00000 |
| rad8           | 1.82566e-64 | 1.00000 | 1.82566e-64 | 1.00000 |

0.100000000E-08 Pa, 290.000000 K

| Rate constant                 | True (fraction)        | Effective (fraction)   |             |          |
|-------------------------------|------------------------|------------------------|-------------|----------|
| Total                         | 3.81171e-14 (1.00 )    | 3.81171e-14 (1.00 )    |             |          |
| Formation of rad19            | 3.80733e-14 (0.999 )   | 3.80733e-14 (0.999 )   |             |          |
| H-abstraction to cyc2enyl     | 4.36868e-17 (0.00115 ) | 4.36868e-17 (0.00115 ) |             |          |
| H-abstraction to cyclenyl     | 1.56861e-19 (4.12e-06) | 1.56861e-19 (4.12e-06) |             |          |
| species                       | PYtrue                 | Cumul                  | PYeffective | Cumul    |
| Indene+H                      | 0.998282               | 0.998282               | 0.998282    | 0.998282 |
| Benzene+cycloprop-2-enylidene | 0.00114612             | 0.999429               | 0.00114612  | 0.999429 |
| PhCHCCH2+H                    | 0.000533552            | 0.999962               | 0.000533552 | 0.999962 |

|                               |             |          |             |          |
|-------------------------------|-------------|----------|-------------|----------|
| PhCCH+CH3                     | 9.61277e-06 | 0.999972 | 9.61277e-06 | 0.999972 |
| C2H2+PhCH2                    | 8.57172e-06 | 0.999980 | 8.57172e-06 | 0.999980 |
| PhCCCH3+H                     | 6.06370e-06 | 0.999986 | 6.06370e-06 | 0.999986 |
| Ph+MeAc                       | 5.68749e-06 | 0.999992 | 5.68749e-06 | 0.999992 |
| Benzene+cycloprop-1-enylidene | 4.11523e-06 | 0.999996 | 4.11523e-06 | 0.999996 |
| rad67                         | 1.63346e-06 | 0.999998 | 1.63346e-06 | 0.999998 |
| Ph+Allene                     | 8.15840e-07 | 0.999999 | 8.15840e-07 | 0.999999 |
| rad35                         | 6.87689e-07 | 0.999999 | 6.87689e-07 | 0.999999 |
| PhCH2CCH+H                    | 1.34349e-07 | 0.999999 | 1.34349e-07 | 0.999999 |
| PAH7+H                        | 8.20060e-08 | 0.999999 | 8.20060e-08 | 0.999999 |
| rad37                         | 2.33285e-08 | 1.000000 | 2.33285e-08 | 1.000000 |
| rad39                         | 2.30001e-08 | 1.000000 | 2.30001e-08 | 1.000000 |
| rad30                         | 1.35042e-08 | 1.000000 | 1.35042e-08 | 1.000000 |
| PAH9+H                        | 1.31607e-09 | 1.000000 | 1.31607e-09 | 1.000000 |
| rad38                         | 6.71988e-10 | 1.000000 | 6.71988e-10 | 1.000000 |
| PhcycC3H3_A+H                 | 2.32248e-10 | 1.000000 | 2.32248e-10 | 1.000000 |
| PAH10+CH3                     | 1.62717e-10 | 1.000000 | 1.62717e-10 | 1.000000 |
| rad60syn                      | 9.92285e-11 | 1.000000 | 9.92285e-11 | 1.000000 |
| PAH3+H                        | 7.70956e-11 | 1.000000 | 7.70956e-11 | 1.000000 |
| rad60anti                     | 5.07758e-11 | 1.000000 | 5.07758e-11 | 1.000000 |
| rad46                         | 4.57748e-11 | 1.000000 | 4.57748e-11 | 1.000000 |
| rad59                         | 1.43338e-11 | 1.000000 | 1.43338e-11 | 1.000000 |
| PhcycC3H3_B+H                 | 6.32701e-12 | 1.000000 | 6.32701e-12 | 1.000000 |
| rad54                         | 5.90859e-12 | 1.000000 | 5.90859e-12 | 1.000000 |
| Phenyl+cycC3H4                | 5.36584e-12 | 1.000000 | 0.000000    | 1.000000 |
| rad43                         | 4.80969e-12 | 1.000000 | 4.80969e-12 | 1.000000 |
| rad62                         | 1.07018e-12 | 1.000000 | 1.07018e-12 | 1.000000 |
| rad50                         | 8.00597e-13 | 1.000000 | 8.00597e-13 | 1.000000 |
| rad70                         | 2.35807e-13 | 1.000000 | 2.35807e-13 | 1.000000 |
| PAH1+H                        | 1.57377e-13 | 1.000000 | 1.57377e-13 | 1.000000 |
| rad55                         | 1.03709e-13 | 1.000000 | 1.03709e-13 | 1.000000 |
| rad52                         | 1.04176e-14 | 1.000000 | 1.04176e-14 | 1.000000 |
| rad34                         | 9.02825e-15 | 1.000000 | 9.02825e-15 | 1.000000 |
| rad58                         | 8.77577e-15 | 1.000000 | 8.77577e-15 | 1.000000 |
| rad51                         | 5.86071e-15 | 1.000000 | 5.86071e-15 | 1.000000 |
| rad41                         | 2.59126e-15 | 1.000000 | 2.59126e-15 | 1.000000 |
| rad42                         | 1.37914e-15 | 1.000000 | 1.37914e-15 | 1.000000 |
| rad65                         | 1.62088e-16 | 1.000000 | 1.62088e-16 | 1.000000 |
| rad53                         | 7.76876e-17 | 1.000000 | 7.76876e-17 | 1.000000 |
| rad64                         | 2.79837e-17 | 1.000000 | 2.79837e-17 | 1.000000 |
| rad61                         | 1.33318e-17 | 1.000000 | 1.33318e-17 | 1.000000 |
| rad56                         | 1.35816e-18 | 1.000000 | 1.35816e-18 | 1.000000 |
| rad68syn                      | 1.83484e-19 | 1.000000 | 1.83484e-19 | 1.000000 |
| rad68anti                     | 1.34481e-19 | 1.000000 | 1.34481e-19 | 1.000000 |
| rad40syn                      | 4.85494e-21 | 1.000000 | 4.85494e-21 | 1.000000 |
| rad40anti                     | 3.84148e-21 | 1.000000 | 3.84148e-21 | 1.000000 |
| PAH8+H                        | 1.38965e-21 | 1.000000 | 1.38965e-21 | 1.000000 |
| rad73                         | 2.01863e-22 | 1.000000 | 2.01863e-22 | 1.000000 |
| rad71                         | 3.38824e-24 | 1.000000 | 3.38824e-24 | 1.000000 |
| rad19anti                     | 1.34354e-29 | 1.000000 | 1.34354e-29 | 1.000000 |
| rad6                          | 3.18506e-31 | 1.000000 | 3.18506e-31 | 1.000000 |
| rad2                          | 6.47396e-33 | 1.000000 | 6.47396e-33 | 1.000000 |
| rad10                         | 3.48004e-33 | 1.000000 | 3.48004e-33 | 1.000000 |
| rad1                          | 4.86980e-34 | 1.000000 | 4.86980e-34 | 1.000000 |
| rad47                         | 2.37555e-34 | 1.000000 | 2.37555e-34 | 1.000000 |
| rad7                          | 2.36772e-35 | 1.000000 | 2.36772e-35 | 1.000000 |
| rad26                         | 2.13423e-35 | 1.000000 | 2.13423e-35 | 1.000000 |
| rad31                         | 1.01787e-35 | 1.000000 | 1.01787e-35 | 1.000000 |
| rad11                         | 5.05056e-36 | 1.000000 | 5.05056e-36 | 1.000000 |
| rad28                         | 4.91316e-36 | 1.000000 | 4.91316e-36 | 1.000000 |
| rad13                         | 1.36866e-37 | 1.000000 | 1.36866e-37 | 1.000000 |
| rad19syn                      | 6.95957e-38 | 1.000000 | 6.95957e-38 | 1.000000 |
| rad9                          | 3.99893e-38 | 1.000000 | 3.99893e-38 | 1.000000 |
| rad14                         | 3.42279e-38 | 1.000000 | 3.42279e-38 | 1.000000 |
| rad25                         | 2.53469e-38 | 1.000000 | 2.53469e-38 | 1.000000 |
| rad27                         | 6.68173e-39 | 1.000000 | 6.68173e-39 | 1.000000 |
| rad23                         | 4.14677e-40 | 1.000000 | 4.14677e-40 | 1.000000 |
| rad33                         | 2.03126e-40 | 1.000000 | 2.03126e-40 | 1.000000 |
| rad15                         | 1.80515e-41 | 1.000000 | 1.80515e-41 | 1.000000 |
| rad4                          | 9.06366e-42 | 1.000000 | 9.06366e-42 | 1.000000 |
| rad3                          | 5.68053e-42 | 1.000000 | 5.68053e-42 | 1.000000 |
| rad5                          | 1.95905e-42 | 1.000000 | 1.95905e-42 | 1.000000 |
| rad45                         | 1.42042e-42 | 1.000000 | 1.42042e-42 | 1.000000 |
| rad12                         | 2.77793e-43 | 1.000000 | 2.77793e-43 | 1.000000 |
| rad36                         | 9.26358e-44 | 1.000000 | 9.26358e-44 | 1.000000 |
| rad21                         | 6.11500e-44 | 1.000000 | 6.11500e-44 | 1.000000 |
| rad20                         | 6.03315e-44 | 1.000000 | 6.03315e-44 | 1.000000 |
| rad18                         | 6.32444e-47 | 1.000000 | 6.32444e-47 | 1.000000 |
| rad22                         | 1.20477e-47 | 1.000000 | 1.20477e-47 | 1.000000 |
| rad24                         | 4.34452e-48 | 1.000000 | 4.34452e-48 | 1.000000 |

rad8 | 3.73727e-64 1.000000 | 3.73727e-64 1.000000

0.100000000E-08 Pa, 300.000000 K

=====  
Rate constant | True (fraction) | Effective (fraction)  
-----  
Total | 5.34809e-14 (1.00 ) | 5.34809e-14 (1.00 )  
Formation of rad19 | 5.34010e-14 (0.999 ) | 5.34010e-14 (0.999 )  
H-abstraction to cyc2enyl | 7.95823e-17 (0.00149 ) | 7.95823e-17 (0.00149 )  
H-abstraction to cyclenyl | 3.44981e-19 (6.45e-06) | 3.44981e-19 (6.45e-06)

| species                       | PYtrue      | Cumul    | PYeffective | Cumul    |
|-------------------------------|-------------|----------|-------------|----------|
| Indene+H                      | 0.997939    | 0.997939 | 0.997939    | 0.997939 |
| Benzene+cycloprop-2-enylidene | 0.00148805  | 0.999427 | 0.00148805  | 0.999427 |
| PhCHCCH2+H                    | 0.000529814 | 0.999957 | 0.000529814 | 0.999957 |
| PhCCH+CH3                     | 1.04615e-05 | 0.999968 | 1.04615e-05 | 0.999968 |
| C2H2+PhCH2                    | 9.96265e-06 | 0.999978 | 9.96265e-06 | 0.999978 |
| Benzene+cycloprop-1-enylidene | 6.45054e-06 | 0.999984 | 6.45054e-06 | 0.999984 |
| PhCCCH3+H                     | 6.36715e-06 | 0.999990 | 6.36715e-06 | 0.999990 |
| Ph+MeAc                       | 5.99826e-06 | 0.999996 | 5.99826e-06 | 0.999996 |
| rad67                         | 1.76909e-06 | 0.999998 | 1.76909e-06 | 0.999998 |
| Ph+Allene                     | 8.18996e-07 | 0.999999 | 8.18996e-07 | 0.999999 |
| rad35                         | 7.31807e-07 | 1.000000 | 7.31807e-07 | 1.000000 |
| PhCH2CCH+H                    | 1.62469e-07 | 1.000000 | 1.62469e-07 | 1.000000 |
| PAH7+H                        | 1.00667e-07 | 1.000000 | 1.00667e-07 | 1.000000 |
| rad37                         | 2.83206e-08 | 1.000000 | 2.83206e-08 | 1.000000 |
| rad39                         | 2.48351e-08 | 1.000000 | 2.48351e-08 | 1.000000 |
| rad30                         | 1.39398e-08 | 1.000000 | 1.39398e-08 | 1.000000 |
| PAH9+H                        | 1.67898e-09 | 1.000000 | 1.67898e-09 | 1.000000 |
| rad38                         | 7.72652e-10 | 1.000000 | 7.72652e-10 | 1.000000 |
| PhcycC3H3_A+H                 | 3.25290e-10 | 1.000000 | 3.25290e-10 | 1.000000 |
| PAH10+CH3                     | 2.37266e-10 | 1.000000 | 2.37266e-10 | 1.000000 |
| rad60syn                      | 1.06834e-10 | 1.000000 | 1.06834e-10 | 1.000000 |
| PAH3+H                        | 9.84715e-11 | 1.000000 | 9.84715e-11 | 1.000000 |
| rad60anti                     | 5.51572e-11 | 1.000000 | 5.51572e-11 | 1.000000 |
| rad46                         | 5.45644e-11 | 1.000000 | 5.45644e-11 | 1.000000 |
| rad59                         | 1.67258e-11 | 1.000000 | 1.67258e-11 | 1.000000 |
| PhcycC3H3_B+H                 | 1.05896e-11 | 1.000000 | 1.05896e-11 | 1.000000 |
| Phenyl+cycC3H4                | 8.20984e-12 | 1.000000 | 0.000000    | 1.000000 |
| rad54                         | 7.66783e-12 | 1.000000 | 7.66783e-12 | 1.000000 |
| rad43                         | 5.65558e-12 | 1.000000 | 5.65558e-12 | 1.000000 |
| rad62                         | 1.25276e-12 | 1.000000 | 1.25276e-12 | 1.000000 |
| rad50                         | 1.03316e-12 | 1.000000 | 1.03316e-12 | 1.000000 |
| rad70                         | 3.13392e-13 | 1.000000 | 3.13392e-13 | 1.000000 |
| PAH1+H                        | 1.93779e-13 | 1.000000 | 1.93779e-13 | 1.000000 |
| rad55                         | 1.33843e-13 | 1.000000 | 1.33843e-13 | 1.000000 |
| rad52                         | 1.45721e-14 | 1.000000 | 1.45721e-14 | 1.000000 |
| rad34                         | 1.28521e-14 | 1.000000 | 1.28521e-14 | 1.000000 |
| rad58                         | 1.11204e-14 | 1.000000 | 1.11204e-14 | 1.000000 |
| rad51                         | 8.23952e-15 | 1.000000 | 8.23952e-15 | 1.000000 |
| rad41                         | 3.58185e-15 | 1.000000 | 3.58185e-15 | 1.000000 |
| rad42                         | 1.81926e-15 | 1.000000 | 1.81926e-15 | 1.000000 |
| rad65                         | 2.32648e-16 | 1.000000 | 2.32648e-16 | 1.000000 |
| rad53                         | 1.29481e-16 | 1.000000 | 1.29481e-16 | 1.000000 |
| rad64                         | 4.98973e-17 | 1.000000 | 4.98973e-17 | 1.000000 |
| rad61                         | 2.74862e-17 | 1.000000 | 2.74862e-17 | 1.000000 |
| rad56                         | 3.01521e-18 | 1.000000 | 3.01521e-18 | 1.000000 |
| rad68syn                      | 3.96643e-19 | 1.000000 | 3.96643e-19 | 1.000000 |
| rad68anti                     | 2.85688e-19 | 1.000000 | 2.85688e-19 | 1.000000 |
| rad40syn                      | 1.34588e-20 | 1.000000 | 1.34588e-20 | 1.000000 |
| rad40anti                     | 1.02810e-20 | 1.000000 | 1.02810e-20 | 1.000000 |
| PAH8+H                        | 5.53972e-21 | 1.000000 | 5.53972e-21 | 1.000000 |
| rad73                         | 6.54843e-22 | 1.000000 | 6.54843e-22 | 1.000000 |
| rad71                         | 2.13406e-23 | 1.000000 | 2.13406e-23 | 1.000000 |
| rad19anti                     | 1.46846e-25 | 1.000000 | 1.46846e-25 | 1.000000 |
| rad6                          | 1.79028e-28 | 1.000000 | 1.79028e-28 | 1.000000 |
| rad2                          | 1.59698e-28 | 1.000000 | 1.59698e-28 | 1.000000 |
| rad10                         | 7.52188e-29 | 1.000000 | 7.52188e-29 | 1.000000 |
| rad1                          | 1.20175e-29 | 1.000000 | 1.20175e-29 | 1.000000 |
| rad26                         | 8.93025e-30 | 1.000000 | 8.93025e-30 | 1.000000 |
| rad72                         | 4.67174e-30 | 1.000000 | 4.67174e-30 | 1.000000 |
| rad9                          | 3.45424e-30 | 1.000000 | 3.45424e-30 | 1.000000 |
| rad28                         | 1.12251e-30 | 1.000000 | 1.12251e-30 | 1.000000 |
| rad3                          | 1.01162e-30 | 1.000000 | 1.01162e-30 | 1.000000 |
| rad4                          | 5.02521e-31 | 1.000000 | 5.02521e-31 | 1.000000 |
| rad23                         | 1.67178e-31 | 1.000000 | 1.67178e-31 | 1.000000 |
| rad31                         | 9.66297e-32 | 1.000000 | 9.66297e-32 | 1.000000 |
| rad7                          | 1.51208e-32 | 1.000000 | 1.51208e-32 | 1.000000 |
| rad45                         | 1.35226e-32 | 1.000000 | 1.35226e-32 | 1.000000 |

|          |             |         |             |         |
|----------|-------------|---------|-------------|---------|
| rad19syn | 1.12386e-32 | 1.00000 | 1.12386e-32 | 1.00000 |
| rad25    | 3.61933e-33 | 1.00000 | 3.61933e-33 | 1.00000 |
| rad11    | 3.50816e-33 | 1.00000 | 3.50816e-33 | 1.00000 |
| rad14    | 2.58055e-33 | 1.00000 | 2.58055e-33 | 1.00000 |
| rad15    | 1.98750e-33 | 1.00000 | 1.98750e-33 | 1.00000 |
| rad47    | 1.77284e-33 | 1.00000 | 1.77284e-33 | 1.00000 |
| rad27    | 1.45916e-33 | 1.00000 | 1.45916e-33 | 1.00000 |
| rad36    | 4.62202e-34 | 1.00000 | 4.62202e-34 | 1.00000 |
| rad12    | 9.82701e-35 | 1.00000 | 9.82701e-35 | 1.00000 |
| rad13    | 9.23896e-35 | 1.00000 | 9.23896e-35 | 1.00000 |
| rad33    | 1.26368e-35 | 1.00000 | 1.26368e-35 | 1.00000 |
| rad5     | 5.65950e-36 | 1.00000 | 5.65950e-36 | 1.00000 |
| rad21    | 1.07580e-36 | 1.00000 | 1.07580e-36 | 1.00000 |
| rad20    | 6.32966e-37 | 1.00000 | 6.32966e-37 | 1.00000 |
| rad18    | 1.20139e-38 | 1.00000 | 1.20139e-38 | 1.00000 |
| rad22    | 2.07319e-39 | 1.00000 | 2.07319e-39 | 1.00000 |
| rad24    | 4.91496e-40 | 1.00000 | 4.91496e-40 | 1.00000 |
| rad8     | 3.04177e-50 | 1.00000 | 3.04177e-50 | 1.00000 |

0.100000000E-08 Pa, 310.00000 K

=====

| Rate constant             | True (fraction)        | Effective (fraction)   |
|---------------------------|------------------------|------------------------|
| Total                     | 5.92544e-14 (1.00 )    | 5.92544e-14 (1.00 )    |
| Formation of rad19        | 5.91462e-14 (0.998 )   | 5.91462e-14 (0.998 )   |
| H-abstraction to cyc2enyl | 1.07628e-16 (0.00182 ) | 1.07628e-16 (0.00182 ) |
| H-abstraction to cyclenyl | 5.62537e-19 (9.49e-06) | 5.62537e-19 (9.49e-06) |

| species                       | PYtrue      | Cumul    | PYeffective | Cumul    |
|-------------------------------|-------------|----------|-------------|----------|
| Indene+H                      | 0.997536    | 0.997536 | 0.997536    | 0.997536 |
| Benzene+cycloprop-2-enylidene | 0.00181637  | 0.999353 | 0.00181637  | 0.999353 |
| PhCHCCH2+H                    | 0.000599213 | 0.999952 | 0.000599213 | 0.999952 |
| PhCCH+CH3                     | 1.07899e-05 | 0.999963 | 1.07899e-05 | 0.999963 |
| C2H2+PhCH2                    | 9.94973e-06 | 0.999973 | 9.94973e-06 | 0.999973 |
| Benzene+cycloprop-1-enylidene | 9.49359e-06 | 0.999982 | 9.49359e-06 | 0.999982 |
| PhCCCH3+H                     | 6.92725e-06 | 0.999989 | 6.92725e-06 | 0.999989 |
| Ph+MeAc                       | 6.69436e-06 | 0.999996 | 6.69436e-06 | 0.999996 |
| rad67                         | 1.91404e-06 | 0.999998 | 1.91404e-06 | 0.999998 |
| Ph+Allene                     | 1.02854e-06 | 0.999999 | 1.02854e-06 | 0.999999 |
| rad35                         | 8.00939e-07 | 0.999999 | 8.00939e-07 | 0.999999 |
| PhCH2CCH+H                    | 1.75897e-07 | 1.000000 | 1.75897e-07 | 1.000000 |
| PAH7+H                        | 9.96917e-08 | 1.000000 | 9.96917e-08 | 1.000000 |
| rad37                         | 2.86985e-08 | 1.000000 | 2.86985e-08 | 1.000000 |
| rad39                         | 2.78945e-08 | 1.000000 | 2.78945e-08 | 1.000000 |
| rad30                         | 1.58794e-08 | 1.000000 | 1.58794e-08 | 1.000000 |
| PAH9+H                        | 1.63685e-09 | 1.000000 | 1.63685e-09 | 1.000000 |
| rad38                         | 8.60336e-10 | 1.000000 | 8.60336e-10 | 1.000000 |
| PhcycC3H3_A+H                 | 4.09102e-10 | 1.000000 | 4.09102e-10 | 1.000000 |
| PAH10+CH3                     | 2.45221e-10 | 1.000000 | 2.45221e-10 | 1.000000 |
| rad60syn                      | 1.25085e-10 | 1.000000 | 1.25085e-10 | 1.000000 |
| PAH3+H                        | 1.05828e-10 | 1.000000 | 1.05828e-10 | 1.000000 |
| rad60anti                     | 6.43937e-11 | 1.000000 | 6.43937e-11 | 1.000000 |
| rad46                         | 5.94068e-11 | 1.000000 | 5.94068e-11 | 1.000000 |
| rad59                         | 1.93817e-11 | 1.000000 | 1.93817e-11 | 1.000000 |
| PhcycC3H3_B+H                 | 1.41415e-11 | 1.000000 | 1.41415e-11 | 1.000000 |
| Phenyl+cycC3H4                | 1.07882e-11 | 1.000000 | 0.000000    | 1.000000 |
| rad54                         | 8.89606e-12 | 1.000000 | 8.89606e-12 | 1.000000 |
| rad43                         | 6.83075e-12 | 1.000000 | 6.83075e-12 | 1.000000 |
| rad62                         | 1.51159e-12 | 1.000000 | 1.51159e-12 | 1.000000 |
| rad50                         | 1.17696e-12 | 1.000000 | 1.17696e-12 | 1.000000 |
| rad70                         | 3.87563e-13 | 1.000000 | 3.87563e-13 | 1.000000 |
| PAH1+H                        | 2.83537e-13 | 1.000000 | 2.83537e-13 | 1.000000 |
| rad55                         | 1.69858e-13 | 1.000000 | 1.69858e-13 | 1.000000 |
| rad52                         | 1.66060e-14 | 1.000000 | 1.66060e-14 | 1.000000 |
| rad34                         | 1.64058e-14 | 1.000000 | 1.64058e-14 | 1.000000 |
| rad58                         | 1.50872e-14 | 1.000000 | 1.50872e-14 | 1.000000 |
| rad51                         | 1.01582e-14 | 1.000000 | 1.01582e-14 | 1.000000 |
| rad41                         | 4.78440e-15 | 1.000000 | 4.78440e-15 | 1.000000 |
| rad42                         | 2.42635e-15 | 1.000000 | 2.42635e-15 | 1.000000 |
| rad65                         | 2.87409e-16 | 1.000000 | 2.87409e-16 | 1.000000 |
| rad53                         | 1.82136e-16 | 1.000000 | 1.82136e-16 | 1.000000 |
| rad64                         | 6.86553e-17 | 1.000000 | 6.86553e-17 | 1.000000 |
| rad61                         | 3.85257e-17 | 1.000000 | 3.85257e-17 | 1.000000 |
| rad56                         | 4.20810e-18 | 1.000000 | 4.20810e-18 | 1.000000 |
| rad68syn                      | 5.79184e-19 | 1.000000 | 5.79184e-19 | 1.000000 |
| rad68anti                     | 4.21603e-19 | 1.000000 | 4.21603e-19 | 1.000000 |
| rad40syn                      | 1.84909e-20 | 1.000000 | 1.84909e-20 | 1.000000 |
| rad40anti                     | 1.45861e-20 | 1.000000 | 1.45861e-20 | 1.000000 |
| PAH8+H                        | 5.99119e-21 | 1.000000 | 5.99119e-21 | 1.000000 |

|           |             |          |             |          |
|-----------|-------------|----------|-------------|----------|
| rad73     | 7.86975e-22 | 1.000000 | 7.86975e-22 | 1.000000 |
| rad71     | 1.54165e-23 | 1.000000 | 1.54165e-23 | 1.000000 |
| rad19anti | 1.86169e-28 | 1.000000 | 1.86169e-28 | 1.000000 |
| rad6      | 4.85077e-30 | 1.000000 | 4.85077e-30 | 1.000000 |
| rad2      | 1.57835e-31 | 1.000000 | 1.57835e-31 | 1.000000 |
| rad10     | 1.77095e-32 | 1.000000 | 1.77095e-32 | 1.000000 |
| rad1      | 1.22676e-32 | 1.000000 | 1.22676e-32 | 1.000000 |
| rad47     | 3.77537e-34 | 1.000000 | 3.77537e-34 | 1.000000 |
| rad7      | 3.58589e-34 | 1.000000 | 3.58589e-34 | 1.000000 |
| rad31     | 1.07023e-34 | 1.000000 | 1.07023e-34 | 1.000000 |
| rad11     | 7.38809e-35 | 1.000000 | 7.38809e-35 | 1.000000 |
| rad26     | 2.22276e-35 | 1.000000 | 2.22276e-35 | 1.000000 |
| rad28     | 7.67472e-36 | 1.000000 | 7.67472e-36 | 1.000000 |
| rad13     | 2.09443e-36 | 1.000000 | 2.09443e-36 | 1.000000 |
| rad19syn  | 1.62279e-36 | 1.000000 | 1.62279e-36 | 1.000000 |
| rad9      | 1.29700e-37 | 1.000000 | 1.29700e-37 | 1.000000 |
| rad14     | 3.93580e-38 | 1.000000 | 3.93580e-38 | 1.000000 |
| rad25     | 3.07860e-38 | 1.000000 | 3.07860e-38 | 1.000000 |
| rad23     | 1.66827e-38 | 1.000000 | 1.66827e-38 | 1.000000 |
| rad27     | 8.41516e-39 | 1.000000 | 8.41516e-39 | 1.000000 |
| rad33     | 2.90769e-39 | 1.000000 | 2.90769e-39 | 1.000000 |
| rad45     | 1.01152e-39 | 1.000000 | 1.01152e-39 | 1.000000 |
| rad4      | 4.63150e-40 | 1.000000 | 4.63150e-40 | 1.000000 |
| rad3      | 3.07269e-40 | 1.000000 | 3.07269e-40 | 1.000000 |
| rad36     | 6.71737e-41 | 1.000000 | 6.71737e-41 | 1.000000 |
| rad15     | 5.88699e-41 | 1.000000 | 5.88699e-41 | 1.000000 |
| rad5      | 1.89565e-42 | 1.000000 | 1.89565e-42 | 1.000000 |
| rad12     | 1.33171e-42 | 1.000000 | 1.33171e-42 | 1.000000 |
| rad21     | 1.24395e-43 | 1.000000 | 1.24395e-43 | 1.000000 |
| rad20     | 1.18499e-43 | 1.000000 | 1.18499e-43 | 1.000000 |
| rad22     | 2.98678e-46 | 1.000000 | 2.98678e-46 | 1.000000 |
| rad18     | 9.10639e-47 | 1.000000 | 9.10639e-47 | 1.000000 |
| rad24     | 1.45550e-47 | 1.000000 | 1.45550e-47 | 1.000000 |
| rad8      | 1.69031e-63 | 1.000000 | 1.69031e-63 | 1.000000 |

0.100000000E-08 Pa, 400.00000 K

=====

| Rate constant             | True (fraction)        | Effective (fraction)   |
|---------------------------|------------------------|------------------------|
| Total                     | 1.29463e-13 (1.00 )    | 1.29463e-13 (1.00 )    |
| Formation of rad19        | 1.28526e-13 (0.993 )   | 1.28526e-13 (0.993 )   |
| H-abstraction to cyc2enyl | 9.19357e-16 (0.00710 ) | 9.19357e-16 (0.00710 ) |
| H-abstraction to cyc1enyl | 1.69485e-17 (0.000131) | 1.69485e-17 (0.000131) |

| species                       | PYtrue      | Cumul    | PYeffective | Cumul    |
|-------------------------------|-------------|----------|-------------|----------|
| Indene+H                      | 0.991683    | 0.991683 | 0.991683    | 0.991683 |
| Benzene+cycloprop-2-enylidene | 0.00710133  | 0.998784 | 0.00710133  | 0.998784 |
| PhCHCCH2+H                    | 0.00100586  | 0.999790 | 0.00100586  | 0.999790 |
| Benzene+cycloprop-1-enylidene | 0.000130914 | 0.999921 | 0.000130914 | 0.999921 |
| C2H2+PhCH2                    | 2.22468e-05 | 0.999943 | 2.22468e-05 | 0.999943 |
| PhCCH+CH3                     | 1.95098e-05 | 0.999963 | 1.95098e-05 | 0.999963 |
| Ph+MeAc                       | 1.45179e-05 | 0.999977 | 1.45179e-05 | 0.999977 |
| PhCCCH3+H                     | 1.31952e-05 | 0.999990 | 1.31952e-05 | 0.999990 |
| rad67                         | 4.22167e-06 | 0.999994 | 4.22167e-06 | 0.999994 |
| Ph+Allene                     | 2.97391e-06 | 0.999997 | 2.97391e-06 | 0.999997 |
| rad35                         | 1.68909e-06 | 0.999999 | 1.68909e-06 | 0.999999 |
| PhCH2CCH+H                    | 6.93048e-07 | 1.000000 | 6.93048e-07 | 1.000000 |
| PAH7+H                        | 2.89758e-07 | 1.000000 | 2.89758e-07 | 1.000000 |
| rad37                         | 8.82205e-08 | 1.000000 | 8.82205e-08 | 1.000000 |
| rad39                         | 7.05188e-08 | 1.000000 | 7.05188e-08 | 1.000000 |
| rad30                         | 3.41246e-08 | 1.000000 | 3.41246e-08 | 1.000000 |
| PAH9+H                        | 5.67069e-09 | 1.000000 | 5.67069e-09 | 1.000000 |
| PhcycC3H3_A+H                 | 4.88900e-09 | 1.000000 | 4.88900e-09 | 1.000000 |
| rad38                         | 3.07435e-09 | 1.000000 | 3.07435e-09 | 1.000000 |
| PAH10+CH3                     | 1.94150e-09 | 1.000000 | 1.94150e-09 | 1.000000 |
| PAH3+H                        | 5.34449e-10 | 1.000000 | 5.34449e-10 | 1.000000 |
| PhcycC3H3_B+H                 | 4.15151e-10 | 1.000000 | 4.15151e-10 | 1.000000 |
| rad60syn                      | 3.79130e-10 | 1.000000 | 3.79130e-10 | 1.000000 |
| rad46                         | 2.31290e-10 | 1.000000 | 2.31290e-10 | 1.000000 |
| Phenyl+cycC3H4                | 2.22328e-10 | 1.000000 | 0.000000    | 1.000000 |
| rad60anti                     | 2.01850e-10 | 1.000000 | 2.01850e-10 | 1.000000 |
| rad59                         | 8.49299e-11 | 1.000000 | 8.49299e-11 | 1.000000 |
| rad54                         | 6.39706e-11 | 1.000000 | 6.39706e-11 | 1.000000 |
| rad43                         | 3.46932e-11 | 1.000000 | 3.46932e-11 | 1.000000 |
| rad50                         | 8.28672e-12 | 1.000000 | 8.28672e-12 | 1.000000 |
| rad62                         | 7.28467e-12 | 1.000000 | 7.28467e-12 | 1.000000 |
| rad70                         | 3.85328e-12 | 1.000000 | 3.85328e-12 | 1.000000 |
| PAH1+H                        | 3.61003e-12 | 1.000000 | 3.61003e-12 | 1.000000 |
| rad55                         | 1.60055e-12 | 1.000000 | 1.60055e-12 | 1.000000 |



|           |             |         |             |         |
|-----------|-------------|---------|-------------|---------|
| rad34     | 2.43952e-13 | 1.00000 | 2.43952e-13 | 1.00000 |
| rad52     | 1.72576e-13 | 1.00000 | 1.72576e-13 | 1.00000 |
| rad58     | 1.69180e-13 | 1.00000 | 1.69180e-13 | 1.00000 |
| rad51     | 1.42864e-13 | 1.00000 | 1.42864e-13 | 1.00000 |
| rad41     | 6.83260e-14 | 1.00000 | 6.83260e-14 | 1.00000 |
| rad42     | 2.71734e-14 | 1.00000 | 2.71734e-14 | 1.00000 |
| rad53     | 6.88019e-15 | 1.00000 | 6.88019e-15 | 1.00000 |
| rad65     | 4.39173e-15 | 1.00000 | 4.39173e-15 | 1.00000 |
| rad61     | 3.43038e-15 | 1.00000 | 3.43038e-15 | 1.00000 |
| rad64     | 3.05834e-15 | 1.00000 | 3.05834e-15 | 1.00000 |
| rad56     | 5.30924e-16 | 1.00000 | 5.30924e-16 | 1.00000 |
| rad68syn  | 7.48244e-17 | 1.00000 | 7.48244e-17 | 1.00000 |
| rad68anti | 5.24834e-17 | 1.00000 | 5.24834e-17 | 1.00000 |
| rad40syn  | 6.39129e-18 | 1.00000 | 6.39129e-18 | 1.00000 |
| PAH8+H    | 5.94551e-18 | 1.00000 | 5.94551e-18 | 1.00000 |
| rad40anti | 4.74371e-18 | 1.00000 | 4.74371e-18 | 1.00000 |
| rad73     | 4.85676e-19 | 1.00000 | 4.85676e-19 | 1.00000 |
| rad71     | 4.97335e-20 | 1.00000 | 4.97335e-20 | 1.00000 |
| rad19anti | 4.76696e-22 | 1.00000 | 4.76696e-22 | 1.00000 |
| rad6      | 1.00146e-24 | 1.00000 | 1.00146e-24 | 1.00000 |
| rad72     | 7.32148e-25 | 1.00000 | 7.32148e-25 | 1.00000 |
| rad23     | 1.27675e-25 | 1.00000 | 1.27675e-25 | 1.00000 |
| rad45     | 6.16992e-27 | 1.00000 | 6.16992e-27 | 1.00000 |
| rad19syn  | 2.04434e-27 | 1.00000 | 2.04434e-27 | 1.00000 |
| rad9      | 1.18214e-27 | 1.00000 | 1.18214e-27 | 1.00000 |
| rad31     | 5.03677e-28 | 1.00000 | 5.03677e-28 | 1.00000 |
| rad36     | 2.65783e-28 | 1.00000 | 2.65783e-28 | 1.00000 |
| rad4      | 1.63560e-28 | 1.00000 | 1.63560e-28 | 1.00000 |
| rad3      | 9.85568e-29 | 1.00000 | 9.85568e-29 | 1.00000 |
| rad7      | 7.90793e-29 | 1.00000 | 7.90793e-29 | 1.00000 |
| rad1      | 2.71886e-29 | 1.00000 | 2.71886e-29 | 1.00000 |
| rad11     | 1.21115e-29 | 1.00000 | 1.21115e-29 | 1.00000 |
| rad26     | 7.19708e-30 | 1.00000 | 7.19708e-30 | 1.00000 |
| rad28     | 1.07620e-30 | 1.00000 | 1.07620e-30 | 1.00000 |
| rad15     | 7.11712e-31 | 1.00000 | 7.11712e-31 | 1.00000 |
| rad13     | 4.96862e-31 | 1.00000 | 4.96862e-31 | 1.00000 |
| rad12     | 1.89510e-31 | 1.00000 | 1.89510e-31 | 1.00000 |
| rad47     | 7.65193e-32 | 1.00000 | 7.65193e-32 | 1.00000 |
| rad10     | 6.31002e-32 | 1.00000 | 6.31002e-32 | 1.00000 |
| rad25     | 1.12718e-32 | 1.00000 | 1.12718e-32 | 1.00000 |
| rad14     | 6.50675e-33 | 1.00000 | 6.50675e-33 | 1.00000 |
| rad27     | 5.53341e-33 | 1.00000 | 5.53341e-33 | 1.00000 |
| rad2      | 5.20043e-33 | 1.00000 | 5.20043e-33 | 1.00000 |
| rad33     | 6.54009e-34 | 1.00000 | 6.54009e-34 | 1.00000 |
| rad22     | 2.51398e-34 | 1.00000 | 2.51398e-34 | 1.00000 |
| rad21     | 4.23364e-35 | 1.00000 | 4.23364e-35 | 1.00000 |
| rad20     | 1.79813e-35 | 1.00000 | 1.79813e-35 | 1.00000 |
| rad5      | 5.79765e-36 | 1.00000 | 5.79765e-36 | 1.00000 |
| rad24     | 3.31389e-37 | 1.00000 | 3.31389e-37 | 1.00000 |
| rad18     | 6.92519e-38 | 1.00000 | 6.92519e-38 | 1.00000 |
| rad8      | 6.65008e-47 | 1.00000 | 6.65008e-47 | 1.00000 |

0.100000000E-08 Pa, 500.000000 K

=====

| Rate constant             | True (fraction)        | Effective (fraction)   |
|---------------------------|------------------------|------------------------|
| Total                     | 2.52837e-13 (1.00 )    | 2.52837e-13 (1.00 )    |
| Formation of rad19        | 2.47941e-13 (0.981 )   | 2.47941e-13 (0.981 )   |
| H-abstraction to cyc2enyl | 4.69058e-15 (0.0186 )  | 4.69058e-15 (0.0186 )  |
| H-abstraction to cyclenyl | 2.05381e-16 (0.000812) | 2.05381e-16 (0.000812) |

| species                       | PYtrue      | Cumul    | PYeffective | Cumul    |
|-------------------------------|-------------|----------|-------------|----------|
| Indene+H                      | 0.978428    | 0.978428 | 0.978428    | 0.978428 |
| Benzene+cycloprop-2-enylidene | 0.0185518   | 0.996979 | 0.0185518   | 0.996979 |
| PhCHCCH2+H                    | 0.00202477  | 0.999004 | 0.00202477  | 0.999004 |
| Benzene+cycloprop-1-enylidene | 0.000812306 | 0.999816 | 0.000812306 | 0.999816 |
| C2H2+PhCH2                    | 5.13363e-05 | 0.999868 | 5.13363e-05 | 0.999868 |
| PhCCH+CH3                     | 3.71182e-05 | 0.999905 | 3.71182e-05 | 0.999905 |
| Ph+MeAc                       | 3.63101e-05 | 0.999941 | 3.63101e-05 | 0.999941 |
| PhCCCH3+H                     | 2.84449e-05 | 0.999970 | 2.84449e-05 | 0.999970 |
| Ph+Allene                     | 1.09470e-05 | 0.999981 | 1.09470e-05 | 0.999981 |
| rad67                         | 1.05822e-05 | 0.999991 | 1.05822e-05 | 0.999991 |
| rad35                         | 4.10935e-06 | 0.999995 | 4.10935e-06 | 0.999995 |
| PhCH2CCH+H                    | 2.95392e-06 | 0.999998 | 2.95392e-06 | 0.999998 |
| PAH7+H                        | 8.51564e-07 | 0.999999 | 8.51564e-07 | 0.999999 |
| rad37                         | 2.86678e-07 | 0.999999 | 2.86678e-07 | 0.999999 |
| rad39                         | 2.02118e-07 | 1.000000 | 2.02118e-07 | 1.000000 |
| rad30                         | 8.94923e-08 | 1.000000 | 8.94923e-08 | 1.000000 |
| PhcycC3H3_A+H                 | 5.02850e-08 | 1.000000 | 5.02850e-08 | 1.000000 |

|                |             |          |             |          |
|----------------|-------------|----------|-------------|----------|
| PAH9+H         | 2.06879e-08 | 1.000000 | 2.06879e-08 | 1.000000 |
| PAH10+CH3      | 1.44052e-08 | 1.000000 | 1.44052e-08 | 1.000000 |
| rad38          | 1.31834e-08 | 1.000000 | 1.31834e-08 | 1.000000 |
| PhcycC3H3_B+H  | 7.81107e-09 | 1.000000 | 7.81107e-09 | 1.000000 |
| Phenyl+cycC3H4 | 3.55660e-09 | 1.000000 | 0.00000     | 1.000000 |
| PAH3+H         | 2.97649e-09 | 1.000000 | 2.97649e-09 | 1.000000 |
| rad60syn       | 1.43183e-09 | 1.000000 | 1.43183e-09 | 1.000000 |
| rad46          | 1.04913e-09 | 1.000000 | 1.04913e-09 | 1.000000 |
| rad60anti      | 7.84373e-10 | 1.000000 | 7.84373e-10 | 1.000000 |
| rad54          | 4.68691e-10 | 1.000000 | 4.68691e-10 | 1.000000 |
| rad59          | 4.42102e-10 | 1.000000 | 4.42102e-10 | 1.000000 |
| rad43          | 1.96278e-10 | 1.000000 | 1.96278e-10 | 1.000000 |
| rad50          | 6.65687e-11 | 1.000000 | 6.65687e-11 | 1.000000 |
| PAH1+H         | 4.68911e-11 | 1.000000 | 4.68911e-11 | 1.000000 |
| rad62          | 3.77646e-11 | 1.000000 | 3.77646e-11 | 1.000000 |
| rad70          | 3.76454e-11 | 1.000000 | 3.76454e-11 | 1.000000 |
| rad55          | 1.50995e-11 | 1.000000 | 1.50995e-11 | 1.000000 |
| rad34          | 3.22092e-12 | 1.000000 | 3.22092e-12 | 1.000000 |
| rad51          | 2.08196e-12 | 1.000000 | 2.08196e-12 | 1.000000 |
| rad58          | 2.05092e-12 | 1.000000 | 2.05092e-12 | 1.000000 |
| rad52          | 1.88540e-12 | 1.000000 | 1.88540e-12 | 1.000000 |
| rad41          | 8.63972e-13 | 1.000000 | 8.63972e-13 | 1.000000 |
| rad42          | 2.74850e-13 | 1.000000 | 2.74850e-13 | 1.000000 |
| rad53          | 1.70507e-13 | 1.000000 | 1.70507e-13 | 1.000000 |
| rad61          | 1.40668e-13 | 1.000000 | 1.40668e-13 | 1.000000 |
| rad64          | 7.73135e-14 | 1.000000 | 7.73135e-14 | 1.000000 |
| rad65          | 6.64224e-14 | 1.000000 | 6.64224e-14 | 1.000000 |
| rad56          | 2.62115e-14 | 1.000000 | 2.62115e-14 | 1.000000 |
| rad68syn       | 3.88259e-15 | 1.000000 | 3.88259e-15 | 1.000000 |
| rad68anti      | 2.67414e-15 | 1.000000 | 2.67414e-15 | 1.000000 |
| PAH8+H         | 8.47559e-16 | 1.000000 | 8.47559e-16 | 1.000000 |
| rad40syn       | 5.55783e-16 | 1.000000 | 5.55783e-16 | 1.000000 |
| rad40anti      | 4.06573e-16 | 1.000000 | 4.06573e-16 | 1.000000 |
| rad73          | 6.83536e-17 | 1.000000 | 6.83536e-17 | 1.000000 |
| rad71          | 1.35737e-17 | 1.000000 | 1.35737e-17 | 1.000000 |
| rad19anti      | 6.68017e-20 | 1.000000 | 6.68017e-20 | 1.000000 |
| rad2           | 2.27210e-21 | 1.000000 | 2.27210e-21 | 1.000000 |
| rad72          | 1.99195e-21 | 1.000000 | 1.99195e-21 | 1.000000 |
| rad23          | 8.02695e-22 | 1.000000 | 8.02695e-22 | 1.000000 |
| rad1           | 2.65726e-22 | 1.000000 | 2.65726e-22 | 1.000000 |
| rad45          | 2.52796e-22 | 1.000000 | 2.52796e-22 | 1.000000 |
| rad6           | 1.10044e-22 | 1.000000 | 1.10044e-22 | 1.000000 |
| rad10          | 4.63711e-23 | 1.000000 | 4.63711e-23 | 1.000000 |
| rad19syn       | 1.45990e-23 | 1.000000 | 1.45990e-23 | 1.000000 |
| rad36          | 1.36046e-23 | 1.000000 | 1.36046e-23 | 1.000000 |
| rad3           | 6.61160e-24 | 1.000000 | 6.61160e-24 | 1.000000 |
| rad4           | 4.16817e-24 | 1.000000 | 4.16817e-24 | 1.000000 |
| rad9           | 1.88828e-24 | 1.000000 | 1.88828e-24 | 1.000000 |
| rad31          | 1.77645e-25 | 1.000000 | 1.77645e-25 | 1.000000 |
| rad7           | 8.31538e-27 | 1.000000 | 8.31538e-27 | 1.000000 |
| rad12          | 1.85135e-27 | 1.000000 | 1.85135e-27 | 1.000000 |
| rad15          | 1.20423e-27 | 1.000000 | 1.20423e-27 | 1.000000 |
| rad11          | 1.12565e-27 | 1.000000 | 1.12565e-27 | 1.000000 |
| rad26          | 7.09008e-29 | 1.000000 | 7.09008e-29 | 1.000000 |
| rad13          | 5.73046e-29 | 1.000000 | 5.73046e-29 | 1.000000 |
| rad28          | 3.64192e-29 | 1.000000 | 3.64192e-29 | 1.000000 |
| rad47          | 5.02583e-30 | 1.000000 | 5.02583e-30 | 1.000000 |
| rad22          | 4.86589e-31 | 1.000000 | 4.86589e-31 | 1.000000 |
| rad25          | 7.41710e-32 | 1.000000 | 7.41710e-32 | 1.000000 |
| rad33          | 5.30890e-32 | 1.000000 | 5.30890e-32 | 1.000000 |
| rad27          | 4.69653e-32 | 1.000000 | 4.69653e-32 | 1.000000 |
| rad14          | 3.20396e-32 | 1.000000 | 3.20396e-32 | 1.000000 |
| rad21          | 6.79671e-33 | 1.000000 | 6.79671e-33 | 1.000000 |
| rad20          | 1.93277e-33 | 1.000000 | 1.93277e-33 | 1.000000 |
| rad24          | 1.37959e-33 | 1.000000 | 1.37959e-33 | 1.000000 |
| rad5           | 7.42174e-36 | 1.000000 | 7.42174e-36 | 1.000000 |
| rad18          | 9.37314e-37 | 1.000000 | 9.37314e-37 | 1.000000 |
| rad8           | 1.56286e-42 | 1.000000 | 1.56286e-42 | 1.000000 |

0.100000000E-08 Pa, 600.000000 K

| Rate constant             | True (fraction)        | Effective (fraction)   |
|---------------------------|------------------------|------------------------|
| Total                     | 4.35570e-13 (1.00 )    | 4.35570e-13 (1.00 )    |
| Formation of rad19        | 4.18892e-13 (0.962 )   | 4.18892e-13 (0.962 )   |
| H-abstraction to cyc2enyl | 1.54751e-14 (0.0355 )  | 1.54751e-14 (0.0355 )  |
| H-abstraction to cyclenyl | 1.20343e-15 (0.00276 ) | 1.20343e-15 (0.00276 ) |

  

| species | PYtrue | Cumul | PYeffective | Cumul |
|---------|--------|-------|-------------|-------|
| -----   | -----  | ----- | -----       | ----- |

|                               |             |          |             |          |
|-------------------------------|-------------|----------|-------------|----------|
| Indene+H                      | 0.957276    | 0.957276 | 0.957276    | 0.957276 |
| Benzene+cycloprop-2-enylidene | 0.0355285   | 0.992805 | 0.0355285   | 0.992805 |
| PhCHCCH2+H                    | 0.00402172  | 0.996826 | 0.00402172  | 0.996826 |
| Benzene+cycloprop-1-enylidene | 0.00276289  | 0.999589 | 0.00276289  | 0.999589 |
| C2H2+PhCH2                    | 0.000111945 | 0.999701 | 0.000111945 | 0.999701 |
| Ph+MeAc                       | 8.57420e-05 | 0.999787 | 8.57420e-05 | 0.999787 |
| PhCCH+CH3                     | 6.75064e-05 | 0.999854 | 6.75064e-05 | 0.999854 |
| PhCCCH3+H                     | 5.90383e-05 | 0.999913 | 5.90383e-05 | 0.999913 |
| Ph+Allene                     | 3.56628e-05 | 0.999949 | 3.56628e-05 | 0.999949 |
| rad67                         | 2.54029e-05 | 0.999975 | 2.54029e-05 | 0.999975 |
| PhCH2CCH+H                    | 1.09199e-05 | 0.999985 | 1.09199e-05 | 0.999985 |
| rad35                         | 9.63305e-06 | 0.999995 | 9.63305e-06 | 0.999995 |
| PAH7+H                        | 2.26706e-06 | 0.999997 | 2.26706e-06 | 0.999997 |
| rad37                         | 8.64904e-07 | 0.999998 | 8.64904e-07 | 0.999998 |
| rad39                         | 5.20249e-07 | 0.999999 | 5.20249e-07 | 0.999999 |
| PhcycC3H3_A+H                 | 3.56529e-07 | 0.999999 | 3.56529e-07 | 0.999999 |
| rad30                         | 2.27441e-07 | 0.999999 | 2.27441e-07 | 0.999999 |
| PAH10+CH3                     | 8.50920e-08 | 0.999999 | 8.50920e-08 | 0.999999 |
| PhcycC3H3_B+H                 | 8.43895e-08 | 0.999999 | 8.43895e-08 | 0.999999 |
| PAH9+H                        | 7.13070e-08 | 1.000000 | 7.13070e-08 | 1.000000 |
| rad38                         | 5.21311e-08 | 1.000000 | 5.21311e-08 | 1.000000 |
| Phenyl+cycC3H4                | 3.58023e-08 | 1.000000 | 0.000000    | 1.000000 |
| PAH3+H                        | 1.45691e-08 | 1.000000 | 1.45691e-08 | 1.000000 |
| rad60syn                      | 5.03972e-09 | 1.000000 | 5.03972e-09 | 1.000000 |
| rad46                         | 4.37621e-09 | 1.000000 | 4.37621e-09 | 1.000000 |
| rad60anti                     | 2.82886e-09 | 1.000000 | 2.82886e-09 | 1.000000 |
| rad54                         | 2.63022e-09 | 1.000000 | 2.63022e-09 | 1.000000 |
| rad59                         | 2.03126e-09 | 1.000000 | 2.03126e-09 | 1.000000 |
| rad43                         | 9.14301e-10 | 1.000000 | 9.14301e-10 | 1.000000 |
| rad50                         | 4.49074e-10 | 1.000000 | 4.49074e-10 | 1.000000 |
| PAH1+H                        | 4.05905e-10 | 1.000000 | 4.05905e-10 | 1.000000 |
| rad70                         | 2.63826e-10 | 1.000000 | 2.63826e-10 | 1.000000 |
| rad62                         | 1.58022e-10 | 1.000000 | 1.58022e-10 | 1.000000 |
| rad55                         | 1.01573e-10 | 1.000000 | 1.01573e-10 | 1.000000 |
| rad34                         | 2.81348e-11 | 1.000000 | 2.81348e-11 | 1.000000 |
| rad51                         | 2.21630e-11 | 1.000000 | 2.21630e-11 | 1.000000 |
| rad58                         | 1.79744e-11 | 1.000000 | 1.79744e-11 | 1.000000 |
| rad52                         | 1.61050e-11 | 1.000000 | 1.61050e-11 | 1.000000 |
| rad41                         | 7.27827e-12 | 1.000000 | 7.27827e-12 | 1.000000 |
| rad61                         | 2.69080e-12 | 1.000000 | 2.69080e-12 | 1.000000 |
| rad53                         | 2.26526e-12 | 1.000000 | 2.26526e-12 | 1.000000 |
| rad42                         | 1.88131e-12 | 1.000000 | 1.88131e-12 | 1.000000 |
| rad64                         | 9.96176e-13 | 1.000000 | 9.96176e-13 | 1.000000 |
| rad65                         | 7.15322e-13 | 1.000000 | 7.15322e-13 | 1.000000 |
| rad56                         | 5.47638e-13 | 1.000000 | 5.47638e-13 | 1.000000 |
| rad68syn                      | 8.54715e-14 | 1.000000 | 8.54715e-14 | 1.000000 |
| rad68anti                     | 5.81389e-14 | 1.000000 | 5.81389e-14 | 1.000000 |
| PAH8+H                        | 3.69240e-14 | 1.000000 | 3.69240e-14 | 1.000000 |
| rad40syn                      | 1.73285e-14 | 1.000000 | 1.73285e-14 | 1.000000 |
| rad40anti                     | 1.26417e-14 | 1.000000 | 1.26417e-14 | 1.000000 |
| rad73                         | 3.37834e-15 | 1.000000 | 3.37834e-15 | 1.000000 |
| rad71                         | 1.04445e-15 | 1.000000 | 1.04445e-15 | 1.000000 |
| rad72                         | 6.43631e-19 | 1.000000 | 6.43631e-19 | 1.000000 |
| rad19anti                     | 4.93441e-19 | 1.000000 | 4.93441e-19 | 1.000000 |
| rad23                         | 4.21634e-20 | 1.000000 | 4.21634e-20 | 1.000000 |
| rad2                          | 3.65995e-20 | 1.000000 | 3.65995e-20 | 1.000000 |
| rad45                         | 1.41982e-20 | 1.000000 | 1.41982e-20 | 1.000000 |
| rad1                          | 6.00796e-21 | 1.000000 | 6.00796e-21 | 1.000000 |
| rad9                          | 4.17248e-21 | 1.000000 | 4.17248e-21 | 1.000000 |
| rad19syn                      | 1.52297e-21 | 1.000000 | 1.52297e-21 | 1.000000 |
| rad36                         | 1.44877e-21 | 1.000000 | 1.44877e-21 | 1.000000 |
| rad3                          | 1.32472e-21 | 1.000000 | 1.32472e-21 | 1.000000 |
| rad4                          | 9.37290e-22 | 1.000000 | 9.37290e-22 | 1.000000 |
| rad10                         | 8.59849e-22 | 1.000000 | 8.59849e-22 | 1.000000 |
| rad6                          | 6.93558e-22 | 1.000000 | 6.93558e-22 | 1.000000 |
| rad12                         | 1.38518e-23 | 1.000000 | 1.38518e-23 | 1.000000 |
| rad31                         | 3.24820e-24 | 1.000000 | 3.24820e-24 | 1.000000 |
| rad15                         | 2.51702e-24 | 1.000000 | 2.51702e-24 | 1.000000 |
| rad7                          | 5.37901e-26 | 1.000000 | 5.37901e-26 | 1.000000 |
| rad11                         | 7.07883e-27 | 1.000000 | 7.07883e-27 | 1.000000 |
| rad26                         | 9.57568e-28 | 1.000000 | 9.57568e-28 | 1.000000 |
| rad28                         | 5.69651e-28 | 1.000000 | 5.69651e-28 | 1.000000 |
| rad13                         | 4.15614e-28 | 1.000000 | 4.15614e-28 | 1.000000 |
| rad47                         | 1.30363e-28 | 1.000000 | 1.30363e-28 | 1.000000 |
| rad22                         | 2.06648e-29 | 1.000000 | 2.06648e-29 | 1.000000 |
| rad24                         | 9.86819e-30 | 1.000000 | 9.86819e-30 | 1.000000 |
| rad21                         | 3.64579e-30 | 1.000000 | 3.64579e-30 | 1.000000 |
| rad33                         | 2.81782e-30 | 1.000000 | 2.81782e-30 | 1.000000 |
| rad25                         | 1.20995e-30 | 1.000000 | 1.20995e-30 | 1.000000 |
| rad27                         | 9.85155e-31 | 1.000000 | 9.85155e-31 | 1.000000 |

|       |             |          |             |          |
|-------|-------------|----------|-------------|----------|
| rad20 | 7.07757e-31 | 1.000000 | 7.07757e-31 | 1.000000 |
| rad14 | 3.51685e-31 | 1.000000 | 3.51685e-31 | 1.000000 |
| rad18 | 3.18405e-35 | 1.000000 | 3.18405e-35 | 1.000000 |
| rad5  | 1.30689e-35 | 1.000000 | 1.30689e-35 | 1.000000 |
| rad8  | 2.39366e-37 | 1.000000 | 2.39366e-37 | 1.000000 |

0.100000000E-08 Pa, 700.000000 K

| Rate constant             | True (fraction)        | Effective (fraction)   |
|---------------------------|------------------------|------------------------|
| Total                     | 6.91694e-13 (1.00 )    | 6.91694e-13 (1.00 )    |
| Formation of rad19        | 6.47922e-13 (0.937 )   | 6.47922e-13 (0.937 )   |
| H-abstraction to cyc2enyl | 3.91858e-14 (0.0567 )  | 3.91858e-14 (0.0567 )  |
| H-abstraction to cyclenyl | 4.58543e-15 (0.00663 ) | 4.58542e-15 (0.00663 ) |

| species                       | PYtrue      | Cumul    | PYeffective | Cumul    |
|-------------------------------|-------------|----------|-------------|----------|
| Indene+H                      | 0.928261    | 0.928261 | 0.928261    | 0.928261 |
| Benzene+cycloprop-2-enylidene | 0.0566520   | 0.984913 | 0.0566520   | 0.984913 |
| PhCHCCH2+H                    | 0.00759850  | 0.992512 | 0.00759851  | 0.992512 |
| Benzene+cycloprop-1-enylidene | 0.00662927  | 0.999141 | 0.00662927  | 0.999141 |
| C2H2+PhCH2                    | 0.000223367 | 0.999364 | 0.000223367 | 0.999364 |
| Ph+MeAc                       | 0.000184762 | 0.999549 | 0.000184762 | 0.999549 |
| PhCCH+CH3                     | 0.000114475 | 0.999663 | 0.000114475 | 0.999663 |
| PhCCCH3+H                     | 0.000114174 | 0.999778 | 0.000114174 | 0.999778 |
| Ph+Allene                     | 9.86533e-05 | 0.999876 | 9.86533e-05 | 0.999876 |
| rad67                         | 5.61617e-05 | 0.999932 | 5.61618e-05 | 0.999932 |
| PhCH2CCH+H                    | 3.37385e-05 | 0.999966 | 3.37385e-05 | 0.999966 |
| rad35                         | 2.09201e-05 | 0.999987 | 2.09202e-05 | 0.999987 |
| PAH7+H                        | 5.25052e-06 | 0.999992 | 5.25052e-06 | 0.999992 |
| rad37                         | 2.31770e-06 | 0.999995 | 2.31770e-06 | 0.999995 |
| PhcycC3H3_A+H                 | 1.84668e-06 | 0.999997 | 1.84668e-06 | 0.999997 |
| rad39                         | 1.15814e-06 | 0.999998 | 1.15814e-06 | 0.999998 |
| PhcycC3H3_B+H                 | 5.97889e-07 | 0.999998 | 5.97889e-07 | 0.999998 |
| rad30                         | 5.35177e-07 | 0.999999 | 5.35177e-07 | 0.999999 |
| PAH10+CH3                     | 3.93624e-07 | 0.999999 | 3.93624e-07 | 0.999999 |
| Phenyl+cycC3H4                | 2.47273e-07 | 0.999999 | 0.00000     | 0.999999 |
| PAH9+H                        | 2.20558e-07 | 1.000000 | 2.20558e-07 | 0.999999 |
| rad38                         | 1.79348e-07 | 1.000000 | 1.79348e-07 | 1.000000 |
| PAH3+H                        | 5.98815e-08 | 1.000000 | 5.98815e-08 | 1.000000 |
| rad46                         | 1.59383e-08 | 1.000000 | 1.59383e-08 | 1.000000 |
| rad60syn                      | 1.57198e-08 | 1.000000 | 1.57198e-08 | 1.000000 |
| rad54                         | 1.11959e-08 | 1.000000 | 1.11959e-08 | 1.000000 |
| rad60anti                     | 9.00502e-09 | 1.000000 | 9.00502e-09 | 1.000000 |
| rad59                         | 7.88061e-09 | 1.000000 | 7.88061e-09 | 1.000000 |
| rad43                         | 3.45953e-09 | 1.000000 | 3.45953e-09 | 1.000000 |
| PAH1+H                        | 2.45995e-09 | 1.000000 | 2.45995e-09 | 1.000000 |
| rad50                         | 2.44563e-09 | 1.000000 | 2.44563e-09 | 1.000000 |
| rad70                         | 1.34938e-09 | 1.000000 | 1.34938e-09 | 1.000000 |
| rad62                         | 5.31170e-10 | 1.000000 | 5.31170e-10 | 1.000000 |
| rad55                         | 4.95201e-10 | 1.000000 | 4.95201e-10 | 1.000000 |
| rad51                         | 1.72653e-10 | 1.000000 | 1.72653e-10 | 1.000000 |
| rad34                         | 1.70511e-10 | 1.000000 | 1.70511e-10 | 1.000000 |
| rad58                         | 1.15481e-10 | 1.000000 | 1.15481e-10 | 1.000000 |
| rad52                         | 1.05442e-10 | 1.000000 | 1.05442e-10 | 1.000000 |
| rad41                         | 4.33848e-11 | 1.000000 | 4.33848e-11 | 1.000000 |
| rad61                         | 2.93831e-11 | 1.000000 | 2.93831e-11 | 1.000000 |
| rad53                         | 1.83949e-11 | 1.000000 | 1.83949e-11 | 1.000000 |
| rad42                         | 9.22818e-12 | 1.000000 | 9.22818e-12 | 1.000000 |
| rad64                         | 7.68987e-12 | 1.000000 | 7.68987e-12 | 1.000000 |
| rad56                         | 6.14022e-12 | 1.000000 | 6.14022e-12 | 1.000000 |
| rad65                         | 5.56200e-12 | 1.000000 | 5.56200e-12 | 1.000000 |
| rad68syn                      | 1.01762e-12 | 1.000000 | 1.01762e-12 | 1.000000 |
| PAH8+H                        | 7.27467e-13 | 1.000000 | 7.27467e-13 | 1.000000 |
| rad68anti                     | 6.85898e-13 | 1.000000 | 6.85898e-13 | 1.000000 |
| rad40syn                      | 2.67923e-13 | 1.000000 | 2.67923e-13 | 1.000000 |
| rad40anti                     | 1.96404e-13 | 1.000000 | 1.96404e-13 | 1.000000 |
| rad73                         | 8.03975e-14 | 1.000000 | 8.03975e-14 | 1.000000 |
| rad71                         | 3.42948e-14 | 1.000000 | 3.42948e-14 | 1.000000 |
| rad72                         | 5.61670e-17 | 1.000000 | 5.61670e-17 | 1.000000 |
| rad9                          | 3.01844e-18 | 1.000000 | 3.01844e-18 | 1.000000 |
| rad19anti                     | 6.95729e-19 | 1.000000 | 6.95729e-19 | 1.000000 |
| rad2                          | 3.25702e-19 | 1.000000 | 3.25702e-19 | 1.000000 |
| rad23                         | 1.92735e-19 | 1.000000 | 1.92735e-19 | 1.000000 |
| rad45                         | 5.85758e-20 | 1.000000 | 5.85758e-20 | 1.000000 |
| rad1                          | 5.84448e-20 | 1.000000 | 5.84448e-20 | 1.000000 |
| rad12                         | 1.17945e-20 | 1.000000 | 1.17945e-20 | 1.000000 |
| rad19syn                      | 8.87889e-21 | 1.000000 | 8.87889e-21 | 1.000000 |
| rad36                         | 8.66230e-21 | 1.000000 | 8.66230e-21 | 1.000000 |
| rad10                         | 4.75738e-21 | 1.000000 | 4.75738e-21 | 1.000000 |

|       |             |          |             |          |
|-------|-------------|----------|-------------|----------|
| rad4  | 1.37042e-21 | 1.000000 | 1.37042e-21 | 1.000000 |
| rad6  | 1.22971e-21 | 1.000000 | 1.22971e-21 | 1.000000 |
| rad15 | 1.20011e-21 | 1.000000 | 1.20011e-21 | 1.000000 |
| rad3  | 9.98205e-22 | 1.000000 | 9.98205e-22 | 1.000000 |
| rad31 | 9.71078e-24 | 1.000000 | 9.71078e-24 | 1.000000 |
| rad7  | 1.04451e-25 | 1.000000 | 1.04451e-25 | 1.000000 |
| rad24 | 2.00377e-26 | 1.000000 | 2.00377e-26 | 1.000000 |
| rad11 | 1.46757e-26 | 1.000000 | 1.46757e-26 | 1.000000 |
| rad26 | 4.04157e-27 | 1.000000 | 4.04158e-27 | 1.000000 |
| rad21 | 3.05149e-27 | 1.000000 | 3.05149e-27 | 1.000000 |
| rad28 | 2.54481e-27 | 1.000000 | 2.54481e-27 | 1.000000 |
| rad47 | 1.29142e-27 | 1.000000 | 1.29142e-27 | 1.000000 |
| rad13 | 9.90205e-28 | 1.000000 | 9.90205e-28 | 1.000000 |
| rad33 | 9.16226e-28 | 1.000000 | 9.16226e-28 | 1.000000 |
| rad20 | 4.78986e-28 | 1.000000 | 4.78987e-28 | 1.000000 |
| rad22 | 1.00950e-28 | 1.000000 | 1.00950e-28 | 1.000000 |
| rad25 | 4.89809e-29 | 1.000000 | 4.89809e-29 | 1.000000 |
| rad27 | 4.77248e-29 | 1.000000 | 4.77248e-29 | 1.000000 |
| rad14 | 8.64829e-30 | 1.000000 | 8.64829e-30 | 1.000000 |
| rad8  | 5.34063e-32 | 1.000000 | 5.34063e-32 | 1.000000 |
| rad18 | 2.37760e-33 | 1.000000 | 2.37760e-33 | 1.000000 |
| rad5  | 3.54891e-35 | 1.000000 | 3.54891e-35 | 1.000000 |

0.100000000E-08 Pa, 800.00000 K

| Rate constant             | True (fraction)       | Effective (fraction)  |
|---------------------------|-----------------------|-----------------------|
| Total                     | 1.03759e-12 (1.00 )   | 1.03758e-12 (1.00 )   |
| Formation of rad19        | 9.41065e-13 (0.907 )  | 9.41063e-13 (0.907 )  |
| H-abstraction to cyc2enyl | 8.32953e-14 (0.0803 ) | 8.32953e-14 (0.0803 ) |
| H-abstraction to cyc1enyl | 1.32261e-14 (0.0127 ) | 1.32261e-14 (0.0127 ) |

| species                       | PYtrue      | Cumul    | PYeffective | Cumul    |
|-------------------------------|-------------|----------|-------------|----------|
| Indene+H                      | 0.891851    | 0.891851 | 0.891852    | 0.891852 |
| Benzene+cycloprop-2-enylidene | 0.0802780   | 0.972129 | 0.0802781   | 0.972130 |
| PhCHCCH2+H                    | 0.0134622   | 0.985591 | 0.0134623   | 0.985592 |
| Benzene+cycloprop-1-enylidene | 0.0127470   | 0.998338 | 0.0127470   | 0.998339 |
| C2H2+PhCH2                    | 0.000407098 | 0.998746 | 0.000407098 | 0.998747 |
| Ph+MeAc                       | 0.000361138 | 0.999107 | 0.000361137 | 0.999108 |
| Ph+Allene                     | 0.000232338 | 0.999339 | 0.000232338 | 0.999340 |
| PhCCCH3+H                     | 0.000203971 | 0.999543 | 0.000203971 | 0.999544 |
| PhCCH+CH3                     | 0.000180552 | 0.999724 | 0.000180553 | 0.999725 |
| rad67                         | 0.000113174 | 0.999837 | 0.000113174 | 0.999838 |
| PhCH2CCH+H                    | 8.77930e-05 | 0.999924 | 8.77932e-05 | 0.999925 |
| rad35                         | 4.16128e-05 | 0.999966 | 4.16129e-05 | 0.999967 |
| PAH7+H                        | 1.05800e-05 | 0.999977 | 1.05800e-05 | 0.999978 |
| PhcycC3H3_A+H                 | 7.41209e-06 | 0.999984 | 7.41210e-06 | 0.999985 |
| rad37                         | 5.46662e-06 | 0.999990 | 5.46663e-06 | 0.999991 |
| PhcycC3H3_B+H                 | 3.06124e-06 | 0.999993 | 3.06124e-06 | 0.999994 |
| rad39                         | 2.23427e-06 | 0.999995 | 2.23428e-06 | 0.999996 |
| PAH10+CH3                     | 1.45372e-06 | 0.999996 | 1.45373e-06 | 0.999997 |
| Phenyl+cycC3H4                | 1.26413e-06 | 0.999998 | 0.000000    | 0.999997 |
| rad30                         | 1.14933e-06 | 0.999999 | 1.14933e-06 | 0.999998 |
| PAH9+H                        | 6.06281e-07 | 0.999999 | 6.06282e-07 | 0.999999 |
| rad38                         | 5.31254e-07 | 1.000000 | 5.31255e-07 | 1.000000 |
| PAH3+H                        | 2.06534e-07 | 1.000000 | 2.06535e-07 | 1.000000 |
| rad46                         | 5.03837e-08 | 1.000000 | 5.03838e-08 | 1.000000 |
| rad60syn                      | 4.30113e-08 | 1.000000 | 4.30113e-08 | 1.000000 |
| rad54                         | 3.72615e-08 | 1.000000 | 3.72615e-08 | 1.000000 |
| rad59                         | 2.58004e-08 | 1.000000 | 2.58004e-08 | 1.000000 |
| rad60anti                     | 2.50612e-08 | 1.000000 | 2.50612e-08 | 1.000000 |
| PAH1+H                        | 1.11102e-08 | 1.000000 | 1.11102e-08 | 1.000000 |
| rad50                         | 1.08530e-08 | 1.000000 | 1.08530e-08 | 1.000000 |
| rad43                         | 1.08255e-08 | 1.000000 | 1.08255e-08 | 1.000000 |
| rad70                         | 5.27763e-09 | 1.000000 | 5.27763e-09 | 1.000000 |
| rad55                         | 1.83174e-09 | 1.000000 | 1.83175e-09 | 1.000000 |
| rad62                         | 1.46956e-09 | 1.000000 | 1.46956e-09 | 1.000000 |
| rad51                         | 1.02140e-09 | 1.000000 | 1.02140e-09 | 1.000000 |
| rad34                         | 7.64053e-10 | 1.000000 | 7.64054e-10 | 1.000000 |
| rad58                         | 5.66064e-10 | 1.000000 | 5.66065e-10 | 1.000000 |
| rad52                         | 5.41768e-10 | 1.000000 | 5.41769e-10 | 1.000000 |
| rad61                         | 2.09071e-10 | 1.000000 | 2.09072e-10 | 1.000000 |
| rad41                         | 1.94594e-10 | 1.000000 | 1.94595e-10 | 1.000000 |
| rad53                         | 1.01501e-10 | 1.000000 | 1.01501e-10 | 1.000000 |
| rad56                         | 4.31932e-11 | 1.000000 | 4.31933e-11 | 1.000000 |
| rad64                         | 4.01362e-11 | 1.000000 | 4.01363e-11 | 1.000000 |
| rad42                         | 3.44813e-11 | 1.000000 | 3.44814e-11 | 1.000000 |
| rad65                         | 3.26029e-11 | 1.000000 | 3.26029e-11 | 1.000000 |
| PAH8+H                        | 8.11495e-12 | 1.000000 | 8.11497e-12 | 1.000000 |

|           |             |         |             |         |
|-----------|-------------|---------|-------------|---------|
| rad68syn  | 7.66845e-12 | 1.00000 | 7.66845e-12 | 1.00000 |
| rad68anti | 5.13228e-12 | 1.00000 | 5.13229e-12 | 1.00000 |
| rad40syn  | 2.48636e-12 | 1.00000 | 2.48636e-12 | 1.00000 |
| rad40anti | 1.83893e-12 | 1.00000 | 1.83893e-12 | 1.00000 |
| rad73     | 1.11381e-12 | 1.00000 | 1.11381e-12 | 1.00000 |
| rad71     | 6.08037e-13 | 1.00000 | 6.08038e-13 | 1.00000 |
| rad72     | 2.02032e-15 | 1.00000 | 2.02032e-15 | 1.00000 |
| rad9      | 2.68751e-16 | 1.00000 | 2.68752e-16 | 1.00000 |
| rad12     | 6.62384e-19 | 1.00000 | 6.62385e-19 | 1.00000 |
| rad19anti | 6.02835e-19 | 1.00000 | 6.02835e-19 | 1.00000 |
| rad23     | 3.63137e-19 | 1.00000 | 3.63138e-19 | 1.00000 |
| rad2      | 2.95415e-19 | 1.00000 | 2.95415e-19 | 1.00000 |
| rad45     | 1.49527e-19 | 1.00000 | 1.49527e-19 | 1.00000 |
| rad1      | 7.91589e-20 | 1.00000 | 7.91590e-20 | 1.00000 |
| rad15     | 6.12184e-20 | 1.00000 | 6.12184e-20 | 1.00000 |
| rad36     | 1.72195e-20 | 1.00000 | 1.72196e-20 | 1.00000 |
| rad19syn  | 1.44428e-20 | 1.00000 | 1.44428e-20 | 1.00000 |
| rad10     | 5.07179e-21 | 1.00000 | 5.07179e-21 | 1.00000 |
| rad4      | 2.10198e-21 | 1.00000 | 2.10199e-21 | 1.00000 |
| rad3      | 1.94039e-21 | 1.00000 | 1.94039e-21 | 1.00000 |
| rad6      | 1.50493e-21 | 1.00000 | 1.50493e-21 | 1.00000 |
| rad31     | 1.51028e-23 | 1.00000 | 1.51028e-23 | 1.00000 |
| rad24     | 4.04465e-24 | 1.00000 | 4.04465e-24 | 1.00000 |
| rad21     | 1.34470e-24 | 1.00000 | 1.34471e-24 | 1.00000 |
| rad33     | 2.36762e-25 | 1.00000 | 2.36762e-25 | 1.00000 |
| rad20     | 2.16398e-25 | 1.00000 | 2.16399e-25 | 1.00000 |
| rad7      | 1.42577e-25 | 1.00000 | 1.42577e-25 | 1.00000 |
| rad11     | 2.11714e-26 | 1.00000 | 2.11714e-26 | 1.00000 |
| rad13     | 1.70557e-26 | 1.00000 | 1.70558e-26 | 1.00000 |
| rad47     | 8.53940e-27 | 1.00000 | 8.53940e-27 | 1.00000 |
| rad26     | 4.80435e-27 | 1.00000 | 4.80436e-27 | 1.00000 |
| rad27     | 3.72353e-27 | 1.00000 | 3.72354e-27 | 1.00000 |
| rad25     | 3.67480e-27 | 1.00000 | 3.67481e-27 | 1.00000 |
| rad28     | 2.95368e-27 | 1.00000 | 2.95369e-27 | 1.00000 |
| rad8      | 2.39851e-27 | 1.00000 | 2.39851e-27 | 1.00000 |
| rad14     | 3.83211e-28 | 1.00000 | 3.83211e-28 | 1.00000 |
| rad22     | 2.11105e-28 | 1.00000 | 2.11106e-28 | 1.00000 |
| rad18     | 4.85000e-31 | 1.00000 | 4.85001e-31 | 1.00000 |
| rad5      | 1.72530e-34 | 1.00000 | 1.72530e-34 | 1.00000 |

0.100000000E-08 Pa, 900.000000 K

| Rate constant             | True (fraction)       | Effective (fraction)  |
|---------------------------|-----------------------|-----------------------|
| Total                     | 1.49199e-12 (1.00 )   | 1.49199e-12 (1.00 )   |
| Formation of rad19        | 1.30395e-12 (0.874 )  | 1.30394e-12 (0.874 )  |
| H-abstraction to cyc2enyl | 1.56554e-13 (0.105 )  | 1.56554e-13 (0.105 )  |
| H-abstraction to cyclenyl | 3.14892e-14 (0.0211 ) | 3.14890e-14 (0.0211 ) |

| species                       | PYtrue      | Cumul    | PYeffective | Cumul    |
|-------------------------------|-------------|----------|-------------|----------|
| Indene+H                      | 0.848699    | 0.848699 | 0.848703    | 0.848703 |
| Benzene+cycloprop-2-enylidene | 0.104929    | 0.953628 | 0.104930    | 0.953634 |
| PhCHCCH2+H                    | 0.0222941   | 0.975922 | 0.0222941   | 0.975928 |
| Benzene+cycloprop-1-enylidene | 0.0211054   | 0.997028 | 0.0211054   | 0.997033 |
| C2H2+PhCH2                    | 0.000683868 | 0.997712 | 0.000683871 | 0.997717 |
| Ph+MeAc                       | 0.000643403 | 0.998355 | 0.000643406 | 0.998360 |
| Ph+Allene                     | 0.000474185 | 0.998829 | 0.000474187 | 0.998835 |
| PhCCCH3+H                     | 0.000337156 | 0.999166 | 0.000337157 | 0.999172 |
| PhCCH+CH3                     | 0.000266833 | 0.999433 | 0.000266834 | 0.999439 |
| rad67                         | 0.000208252 | 0.999641 | 0.000208253 | 0.999647 |
| PhCH2CCH+H                    | 0.000196562 | 0.999838 | 0.000196563 | 0.999843 |
| rad35                         | 7.58728e-05 | 0.999914 | 7.58733e-05 | 0.999919 |
| PhcycC3H3_A+H                 | 2.42103e-05 | 0.999938 | 2.42105e-05 | 0.999943 |
| PAH7+H                        | 1.88375e-05 | 0.999957 | 1.88376e-05 | 0.999962 |
| PhcycC3H3_B+H                 | 1.21561e-05 | 0.999969 | 1.21561e-05 | 0.999974 |
| rad37                         | 1.14050e-05 | 0.999980 | 1.14050e-05 | 0.999986 |
| Phenyl+cycC3H4                | 5.07995e-06 | 0.999986 | 0.000000    | 0.999986 |
| PAH10+CH3                     | 4.40461e-06 | 0.999990 | 4.40463e-06 | 0.999990 |
| rad39                         | 3.79886e-06 | 0.999994 | 3.79888e-06 | 0.999994 |
| rad30                         | 2.25163e-06 | 0.999996 | 2.25165e-06 | 0.999996 |
| PAH9+H                        | 1.48864e-06 | 0.999997 | 1.48865e-06 | 0.999998 |
| rad38                         | 1.36505e-06 | 0.999999 | 1.36505e-06 | 0.999999 |
| PAH3+H                        | 6.06186e-07 | 0.999999 | 6.06189e-07 | 1.000000 |
| rad46                         | 1.39482e-07 | 1.000000 | 1.39483e-07 | 1.000000 |
| rad60syn                      | 1.03783e-07 | 1.000000 | 1.03784e-07 | 1.000000 |
| rad54                         | 1.00666e-07 | 1.000000 | 1.00667e-07 | 1.000000 |
| rad59                         | 7.22570e-08 | 1.000000 | 7.22573e-08 | 1.000000 |
| rad60anti                     | 6.13421e-08 | 1.000000 | 6.13425e-08 | 1.000000 |
| rad50                         | 4.00788e-08 | 1.000000 | 4.00791e-08 | 1.000000 |

|           |             |         |             |         |
|-----------|-------------|---------|-------------|---------|
| PAH1+H    | 3.94732e-08 | 1.00000 | 3.94734e-08 | 1.00000 |
| rad43     | 2.87031e-08 | 1.00000 | 2.87033e-08 | 1.00000 |
| rad70     | 1.65408e-08 | 1.00000 | 1.65408e-08 | 1.00000 |
| rad55     | 5.38699e-09 | 1.00000 | 5.38702e-09 | 1.00000 |
| rad51     | 4.77134e-09 | 1.00000 | 4.77137e-09 | 1.00000 |
| rad62     | 3.44637e-09 | 1.00000 | 3.44638e-09 | 1.00000 |
| rad34     | 2.67892e-09 | 1.00000 | 2.67894e-09 | 1.00000 |
| rad52     | 2.25237e-09 | 1.00000 | 2.25238e-09 | 1.00000 |
| rad58     | 2.20457e-09 | 1.00000 | 2.20458e-09 | 1.00000 |
| rad61     | 1.06256e-09 | 1.00000 | 1.06257e-09 | 1.00000 |
| rad41     | 6.91191e-10 | 1.00000 | 6.91194e-10 | 1.00000 |
| rad53     | 4.12665e-10 | 1.00000 | 4.12668e-10 | 1.00000 |
| rad56     | 2.12371e-10 | 1.00000 | 2.12372e-10 | 1.00000 |
| rad64     | 1.54860e-10 | 1.00000 | 1.54860e-10 | 1.00000 |
| rad65     | 1.50319e-10 | 1.00000 | 1.50320e-10 | 1.00000 |
| rad42     | 1.03376e-10 | 1.00000 | 1.03377e-10 | 1.00000 |
| PAH8+H    | 5.91171e-11 | 1.00000 | 5.91174e-11 | 1.00000 |
| rad68syn  | 4.07131e-11 | 1.00000 | 4.07134e-11 | 1.00000 |
| rad68anti | 2.70946e-11 | 1.00000 | 2.70946e-11 | 1.00000 |
| rad40syn  | 1.56733e-11 | 1.00000 | 1.56733e-11 | 1.00000 |
| rad40anti | 1.17159e-11 | 1.00000 | 1.17159e-11 | 1.00000 |
| rad73     | 1.01666e-11 | 1.00000 | 1.01667e-11 | 1.00000 |
| rad71     | 6.75145e-12 | 1.00000 | 6.75148e-12 | 1.00000 |
| rad72     | 3.83062e-14 | 1.00000 | 3.83064e-14 | 1.00000 |
| rad9      | 2.37158e-15 | 1.00000 | 2.37159e-15 | 1.00000 |
| rad12     | 4.04546e-18 | 1.00000 | 4.04549e-18 | 1.00000 |
| rad19anti | 4.57501e-19 | 1.00000 | 4.57503e-19 | 1.00000 |
| rad23     | 3.94099e-19 | 1.00000 | 3.94100e-19 | 1.00000 |
| rad15     | 3.74395e-19 | 1.00000 | 3.74397e-19 | 1.00000 |
| rad2      | 2.50412e-19 | 1.00000 | 2.50414e-19 | 1.00000 |
| rad45     | 1.92708e-19 | 1.00000 | 1.92710e-19 | 1.00000 |
| rad1      | 7.41243e-20 | 1.00000 | 7.41247e-20 | 1.00000 |
| rad36     | 2.11681e-20 | 1.00000 | 2.11682e-20 | 1.00000 |
| rad19syn  | 1.51735e-20 | 1.00000 | 1.51736e-20 | 1.00000 |
| rad10     | 4.02323e-21 | 1.00000 | 4.02325e-21 | 1.00000 |
| rad3      | 2.11739e-21 | 1.00000 | 2.11740e-21 | 1.00000 |
| rad4      | 1.97728e-21 | 1.00000 | 1.97728e-21 | 1.00000 |
| rad6      | 1.54490e-21 | 1.00000 | 1.54491e-21 | 1.00000 |
| rad21     | 1.24312e-22 | 1.00000 | 1.24313e-22 | 1.00000 |
| rad24     | 8.13232e-23 | 1.00000 | 8.13237e-23 | 1.00000 |
| rad20     | 2.39352e-23 | 1.00000 | 2.39354e-23 | 1.00000 |
| rad31     | 1.88477e-23 | 1.00000 | 1.88478e-23 | 1.00000 |
| rad33     | 1.64389e-23 | 1.00000 | 1.64390e-23 | 1.00000 |
| rad8      | 5.47269e-24 | 1.00000 | 5.47271e-24 | 1.00000 |
| rad13     | 3.44119e-24 | 1.00000 | 3.44121e-24 | 1.00000 |
| rad25     | 2.46143e-25 | 1.00000 | 2.46143e-25 | 1.00000 |
| rad27     | 2.21049e-25 | 1.00000 | 2.21050e-25 | 1.00000 |
| rad7      | 1.66616e-25 | 1.00000 | 1.66617e-25 | 1.00000 |
| rad11     | 1.20758e-25 | 1.00000 | 1.20758e-25 | 1.00000 |
| rad47     | 4.17543e-26 | 1.00000 | 4.17545e-26 | 1.00000 |
| rad14     | 1.65925e-26 | 1.00000 | 1.65926e-26 | 1.00000 |
| rad26     | 3.79581e-27 | 1.00000 | 3.79584e-27 | 1.00000 |
| rad28     | 2.23230e-27 | 1.00000 | 2.23231e-27 | 1.00000 |
| rad22     | 2.54666e-28 | 1.00000 | 2.54668e-28 | 1.00000 |
| rad18     | 1.59421e-28 | 1.00000 | 1.59422e-28 | 1.00000 |
| rad5      | 1.52423e-33 | 1.00000 | 1.52424e-33 | 1.00000 |

0.100000000E-08 Pa, 1000.00000 K

=====

| Rate constant             | True (fraction)       | Effective (fraction)  |
|---------------------------|-----------------------|-----------------------|
| Total                     | 2.07591e-12 (1.00 )   | 2.07587e-12 (1.00 )   |
| Formation of rad19        | 1.74189e-12 (0.839 )  | 1.74186e-12 (0.839 )  |
| H-abstraction to cyc2enyl | 2.68753e-13 (0.129 )  | 2.68753e-13 (0.129 )  |
| H-abstraction to cyc1enyl | 6.52627e-14 (0.0314 ) | 6.52614e-14 (0.0314 ) |

| species                       | PYtrue      | Cumul    | PYeffective | Cumul    |
|-------------------------------|-------------|----------|-------------|----------|
| Indene+H                      | 0.799582    | 0.799582 | 0.799596    | 0.799596 |
| Benzene+cycloprop-2-enylidene | 0.129463    | 0.929045 | 0.129465    | 0.929061 |
| PhCHCCH2+H                    | 0.0345727   | 0.963618 | 0.0345733   | 0.963635 |
| Benzene+cycloprop-1-enylidene | 0.0314382   | 0.995056 | 0.0314381   | 0.995073 |
| C2H2+PhCH2                    | 0.00107013  | 0.996126 | 0.00107014  | 0.996143 |
| Ph+MeAc                       | 0.00105356  | 0.997180 | 0.00105357  | 0.997197 |
| Ph+Allene                     | 0.000856132 | 0.998036 | 0.000856147 | 0.998053 |
| PhCCCH3+H                     | 0.000518388 | 0.998554 | 0.000518396 | 0.998571 |
| PhCH2CCH+H                    | 0.000387329 | 0.998942 | 0.000387336 | 0.998958 |
| PhCCH+CH3                     | 0.000373412 | 0.999315 | 0.000373419 | 0.999332 |
| rad67                         | 0.000352154 | 0.999667 | 0.000352160 | 0.999684 |
| rad35                         | 0.000127506 | 0.999795 | 0.000127508 | 0.999812 |

|                |             |          |             |          |
|----------------|-------------|----------|-------------|----------|
| PhcycC3H3_A+H  | 6.68787e-05 | 0.999862 | 6.68799e-05 | 0.999878 |
| PhcycC3H3_B+H  | 3.94287e-05 | 0.999901 | 3.94293e-05 | 0.999918 |
| PAH7+H         | 3.02070e-05 | 0.999931 | 3.02075e-05 | 0.999948 |
| rad37          | 2.12565e-05 | 0.999953 | 2.12568e-05 | 0.999969 |
| Phenyl+cycC3H4 | 1.68078e-05 | 0.999969 | 0.00000     | 0.999969 |
| PAH10+CH3      | 1.12446e-05 | 0.999981 | 1.12447e-05 | 0.999981 |
| rad39          | 5.81024e-06 | 0.999986 | 5.81034e-06 | 0.999986 |
| rad30          | 4.04406e-06 | 0.999990 | 4.04413e-06 | 0.999990 |
| PAH9+H         | 3.29361e-06 | 0.999994 | 3.29367e-06 | 0.999994 |
| rad38          | 3.08261e-06 | 0.999997 | 3.08266e-06 | 0.999997 |
| PAH3+H         | 1.54070e-06 | 0.999998 | 1.54073e-06 | 0.999998 |
| rad46          | 3.42239e-07 | 0.999999 | 3.42245e-07 | 0.999999 |
| rad54          | 2.28520e-07 | 0.999999 | 2.28524e-07 | 0.999999 |
| rad60syn       | 2.23169e-07 | 0.999999 | 2.23173e-07 | 0.999999 |
| rad59          | 1.76070e-07 | 0.999999 | 1.76073e-07 | 0.999999 |
| rad60anti      | 1.33518e-07 | 1.000000 | 1.33520e-07 | 0.999999 |
| rad50          | 1.25826e-07 | 1.000000 | 1.25828e-07 | 1.000000 |
| PAH1+H         | 1.15144e-07 | 1.000000 | 1.15145e-07 | 1.000000 |
| rad43          | 6.59875e-08 | 1.000000 | 6.59887e-08 | 1.000000 |
| rad70          | 4.32135e-08 | 1.000000 | 4.32143e-08 | 1.000000 |
| rad51          | 1.82048e-08 | 1.000000 | 1.82051e-08 | 1.000000 |
| rad55          | 1.31137e-08 | 1.000000 | 1.31139e-08 | 1.000000 |
| rad52          | 7.79283e-09 | 1.000000 | 7.79297e-09 | 1.000000 |
| rad34          | 7.69222e-09 | 1.000000 | 7.69236e-09 | 1.000000 |
| rad58          | 7.06658e-09 | 1.000000 | 7.06670e-09 | 1.000000 |
| rad62          | 7.03940e-09 | 1.000000 | 7.03953e-09 | 1.000000 |
| rad61          | 4.12272e-09 | 1.000000 | 4.12278e-09 | 1.000000 |
| rad41          | 2.02447e-09 | 1.000000 | 2.02451e-09 | 1.000000 |
| rad53          | 1.31432e-09 | 1.000000 | 1.31434e-09 | 1.000000 |
| rad56          | 7.88428e-10 | 1.000000 | 7.88442e-10 | 1.000000 |
| rad65          | 5.65099e-10 | 1.000000 | 5.65110e-10 | 1.000000 |
| rad64          | 4.71855e-10 | 1.000000 | 4.71863e-10 | 1.000000 |
| PAH8+H         | 3.09749e-10 | 1.000000 | 3.09755e-10 | 1.000000 |
| rad42          | 2.59222e-10 | 1.000000 | 2.59226e-10 | 1.000000 |
| rad68syn       | 1.64237e-10 | 1.000000 | 1.64240e-10 | 1.000000 |
| rad68anti      | 1.08793e-10 | 1.000000 | 1.08795e-10 | 1.000000 |
| rad40syn       | 7.30616e-11 | 1.000000 | 7.30628e-11 | 1.000000 |
| rad73          | 6.65983e-11 | 1.000000 | 6.65995e-11 | 1.000000 |
| rad40anti      | 5.52183e-11 | 1.000000 | 5.52193e-11 | 1.000000 |
| rad71          | 5.18856e-11 | 1.000000 | 5.18865e-11 | 1.000000 |
| rad72          | 4.47183e-13 | 1.000000 | 4.47191e-13 | 1.000000 |
| rad9           | 4.34229e-15 | 1.000000 | 4.34238e-15 | 1.000000 |
| rad12          | 7.27750e-18 | 1.000000 | 7.27764e-18 | 1.000000 |
| rad15          | 5.70187e-19 | 1.000000 | 5.70197e-19 | 1.000000 |
| rad23          | 3.86706e-19 | 1.000000 | 3.86713e-19 | 1.000000 |
| rad19anti      | 3.42048e-19 | 1.000000 | 3.42054e-19 | 1.000000 |
| rad45          | 2.18554e-19 | 1.000000 | 2.18558e-19 | 1.000000 |
| rad2           | 2.05744e-19 | 1.000000 | 2.05748e-19 | 1.000000 |
| rad1           | 6.09103e-20 | 1.000000 | 6.09114e-20 | 1.000000 |
| rad36          | 2.28694e-20 | 1.000000 | 2.28698e-20 | 1.000000 |
| rad19syn       | 1.42443e-20 | 1.000000 | 1.42446e-20 | 1.000000 |
| rad10          | 3.02778e-21 | 1.000000 | 3.02783e-21 | 1.000000 |
| rad21          | 2.11576e-21 | 1.000000 | 2.11580e-21 | 1.000000 |
| rad3           | 1.74335e-21 | 1.000000 | 1.74338e-21 | 1.000000 |
| rad6           | 1.65134e-21 | 1.000000 | 1.65136e-21 | 1.000000 |
| rad4           | 1.54585e-21 | 1.000000 | 1.54588e-21 | 1.000000 |
| rad8           | 6.27706e-22 | 1.000000 | 6.27717e-22 | 1.000000 |
| rad20          | 4.93245e-22 | 1.000000 | 4.93254e-22 | 1.000000 |
| rad24          | 3.61522e-22 | 1.000000 | 3.61528e-22 | 1.000000 |
| rad33          | 2.31462e-22 | 1.000000 | 2.31466e-22 | 1.000000 |
| rad13          | 2.20289e-22 | 1.000000 | 2.20293e-22 | 1.000000 |
| rad31          | 2.18570e-23 | 1.000000 | 2.18575e-23 | 1.000000 |
| rad11          | 1.06319e-23 | 1.000000 | 1.06321e-23 | 1.000000 |
| rad25          | 7.69190e-24 | 1.000000 | 7.69203e-24 | 1.000000 |
| rad27          | 5.63063e-24 | 1.000000 | 5.63073e-24 | 1.000000 |
| rad7           | 4.09407e-25 | 1.000000 | 4.09415e-25 | 1.000000 |
| rad14          | 4.01739e-25 | 1.000000 | 4.01746e-25 | 1.000000 |
| rad47          | 1.62908e-25 | 1.000000 | 1.62911e-25 | 1.000000 |
| rad18          | 4.29912e-26 | 1.000000 | 4.29920e-26 | 1.000000 |
| rad26          | 4.14487e-27 | 1.000000 | 4.14494e-27 | 1.000000 |
| rad28          | 1.62185e-27 | 1.000000 | 1.62188e-27 | 1.000000 |
| rad22          | 2.95051e-28 | 1.000000 | 2.95056e-28 | 1.000000 |
| rad5           | 2.64985e-32 | 1.000000 | 2.64989e-32 | 1.000000 |

0.100000000E-08 Pa, 1100.00000 K

=====

| Rate constant      | True (fraction)      | Effective (fraction) |
|--------------------|----------------------|----------------------|
| Total              | 2.81236e-12 (1.00 )  | 2.81222e-12 (1.00 )  |
| Formation of rad19 | 2.25993e-12 (0.804 ) | 2.25980e-12 (0.804 ) |



H-abstraction to cyc2enyl | 4.30538e-13 (0.153 ) 4.30538e-13 (0.153 )  
H-abstraction to cyc1enyl | 1.21896e-13 (0.0433 ) 1.21889e-13 (0.0433 )

| species                       | PYtrue      | Cumul    | PYeffective | Cumul    |
|-------------------------------|-------------|----------|-------------|----------|
| Indene+H                      | 0.745455    | 0.745455 | 0.745493    | 0.745493 |
| Benzene+cycloprop-2-enylidene | 0.153088    | 0.898543 | 0.153095    | 0.898588 |
| PhCHCCH2+H                    | 0.0504085   | 0.948951 | 0.0504110   | 0.948999 |
| Benzene+cycloprop-1-enylidene | 0.0433429   | 0.992294 | 0.0433425   | 0.992342 |
| Ph+MeAc                       | 0.00159989  | 0.993894 | 0.00159997  | 0.993942 |
| C2H2+PhCH2                    | 0.00157393  | 0.995468 | 0.00157401  | 0.995516 |
| Ph+Allene                     | 0.00139377  | 0.996862 | 0.00139384  | 0.996909 |
| PhCCCH3+H                     | 0.000746146 | 0.997608 | 0.000746184 | 0.997656 |
| PhCH2CCH+H                    | 0.000685299 | 0.998293 | 0.000685333 | 0.998341 |
| rad67                         | 0.000551509 | 0.998845 | 0.000551537 | 0.998892 |
| PhCCH+CH3                     | 0.000499927 | 0.999345 | 0.000499952 | 0.999392 |
| rad35                         | 0.000198904 | 0.999544 | 0.000198914 | 0.999591 |
| PhcycC3H3_A+H                 | 0.000160985 | 0.999705 | 0.000160994 | 0.999752 |
| PhcycC3H3_B+H                 | 0.000108569 | 0.999813 | 0.000108575 | 0.999861 |
| Phenyl+cycC3H4                | 4.74535e-05 | 0.999861 | 0.00000     | 0.999861 |
| PAH7+H                        | 4.44306e-05 | 0.999905 | 4.44328e-05 | 0.999905 |
| rad37                         | 3.57976e-05 | 0.999941 | 3.57993e-05 | 0.999941 |
| PAH10+CH3                     | 2.47740e-05 | 0.999966 | 2.47753e-05 | 0.999966 |
| rad39                         | 8.15502e-06 | 0.999974 | 8.15543e-06 | 0.999974 |
| rad30                         | 6.70503e-06 | 0.999981 | 6.70536e-06 | 0.999981 |
| PAH9+H                        | 6.62670e-06 | 0.999987 | 6.62703e-06 | 0.999987 |
| rad38                         | 6.20641e-06 | 0.999993 | 6.20672e-06 | 0.999994 |
| PAH3+H                        | 3.44988e-06 | 0.999997 | 3.45006e-06 | 0.999997 |
| rad46                         | 7.53032e-07 | 0.999998 | 7.53070e-07 | 0.999998 |
| rad54                         | 4.48842e-07 | 0.999998 | 4.48864e-07 | 0.999998 |
| rad60syn                      | 4.32688e-07 | 0.999998 | 4.32709e-07 | 0.999999 |
| rad59                         | 3.79560e-07 | 0.999999 | 3.79579e-07 | 0.999999 |
| rad50                         | 3.42341e-07 | 0.999999 | 3.42358e-07 | 0.999999 |
| PAH1+H                        | 2.85109e-07 | 0.999999 | 2.85123e-07 | 1.000000 |
| rad60anti                     | 2.61576e-07 | 1.000000 | 2.61589e-07 | 1.000000 |
| rad43                         | 1.34197e-07 | 1.000000 | 1.34204e-07 | 1.000000 |
| rad70                         | 9.71315e-08 | 1.000000 | 9.71362e-08 | 1.000000 |
| rad51                         | 5.83466e-08 | 1.000000 | 5.83495e-08 | 1.000000 |
| rad55                         | 2.73128e-08 | 1.000000 | 2.73142e-08 | 1.000000 |
| rad52                         | 2.29834e-08 | 1.000000 | 2.29845e-08 | 1.000000 |
| rad58                         | 1.92024e-08 | 1.000000 | 1.92034e-08 | 1.000000 |
| rad34                         | 1.87451e-08 | 1.000000 | 1.87461e-08 | 1.000000 |
| rad61                         | 1.28390e-08 | 1.000000 | 1.28397e-08 | 1.000000 |
| rad62                         | 1.28154e-08 | 1.000000 | 1.28161e-08 | 1.000000 |
| rad41                         | 5.04814e-09 | 1.000000 | 5.04840e-09 | 1.000000 |
| rad53                         | 3.43664e-09 | 1.000000 | 3.43682e-09 | 1.000000 |
| rad56                         | 2.33966e-09 | 1.000000 | 2.33978e-09 | 1.000000 |
| rad65                         | 1.78385e-09 | 1.000000 | 1.78394e-09 | 1.000000 |
| PAH8+H                        | 1.24981e-09 | 1.000000 | 1.24987e-09 | 1.000000 |
| rad64                         | 1.19311e-09 | 1.000000 | 1.19317e-09 | 1.000000 |
| rad42                         | 5.61778e-10 | 1.000000 | 5.61806e-10 | 1.000000 |
| rad68syn                      | 5.31777e-10 | 1.000000 | 5.31804e-10 | 1.000000 |
| rad68anti                     | 3.50889e-10 | 1.000000 | 3.50907e-10 | 1.000000 |
| rad73                         | 3.32910e-10 | 1.000000 | 3.32927e-10 | 1.000000 |
| rad71                         | 2.96145e-10 | 1.000000 | 2.96160e-10 | 1.000000 |
| rad40syn                      | 2.67659e-10 | 1.000000 | 2.67672e-10 | 1.000000 |
| rad40anti                     | 2.04456e-10 | 1.000000 | 2.04466e-10 | 1.000000 |
| rad72                         | 3.56687e-12 | 1.000000 | 3.56704e-12 | 1.000000 |
| rad9                          | 4.00166e-15 | 1.000000 | 4.00187e-15 | 1.000000 |
| rad12                         | 7.93739e-18 | 1.000000 | 7.93778e-18 | 1.000000 |
| rad15                         | 4.79115e-19 | 1.000000 | 4.79140e-19 | 1.000000 |
| rad23                         | 3.67593e-19 | 1.000000 | 3.67611e-19 | 1.000000 |
| rad19anti                     | 2.56276e-19 | 1.000000 | 2.56289e-19 | 1.000000 |
| rad45                         | 2.22465e-19 | 1.000000 | 2.22477e-19 | 1.000000 |
| rad2                          | 1.59463e-19 | 1.000000 | 1.59470e-19 | 1.000000 |
| rad1                          | 4.70953e-20 | 1.000000 | 4.70977e-20 | 1.000000 |
| rad36                         | 2.29948e-20 | 1.000000 | 2.29959e-20 | 1.000000 |
| rad19syn                      | 1.28391e-20 | 1.000000 | 1.28398e-20 | 1.000000 |
| rad21                         | 9.63737e-21 | 1.000000 | 9.63784e-21 | 1.000000 |
| rad8                          | 7.65078e-21 | 1.000000 | 7.65117e-21 | 1.000000 |
| rad13                         | 3.15539e-21 | 1.000000 | 3.15555e-21 | 1.000000 |
| rad6                          | 2.94658e-21 | 1.000000 | 2.94673e-21 | 1.000000 |
| rad20                         | 2.48655e-21 | 1.000000 | 2.48667e-21 | 1.000000 |
| rad10                         | 2.24488e-21 | 1.000000 | 2.24498e-21 | 1.000000 |
| rad3                          | 1.30204e-21 | 1.000000 | 1.30210e-21 | 1.000000 |
| rad4                          | 1.12961e-21 | 1.000000 | 1.12967e-21 | 1.000000 |
| rad33                         | 8.69060e-22 | 1.000000 | 8.69109e-22 | 1.000000 |
| rad24                         | 7.72326e-22 | 1.000000 | 7.72364e-22 | 1.000000 |
| rad11                         | 5.52893e-22 | 1.000000 | 5.52920e-22 | 1.000000 |
| rad25                         | 7.88055e-23 | 1.000000 | 7.88094e-23 | 1.000000 |

|       |             |         |             |         |
|-------|-------------|---------|-------------|---------|
| rad27 | 4.73302e-23 | 1.00000 | 4.73325e-23 | 1.00000 |
| rad31 | 2.41068e-23 | 1.00000 | 2.41079e-23 | 1.00000 |
| rad7  | 1.89492e-23 | 1.00000 | 1.89502e-23 | 1.00000 |
| rad18 | 4.94611e-24 | 1.00000 | 4.94635e-24 | 1.00000 |
| rad14 | 3.73375e-24 | 1.00000 | 3.73394e-24 | 1.00000 |
| rad47 | 5.24230e-25 | 1.00000 | 5.24256e-25 | 1.00000 |
| rad26 | 2.58743e-26 | 1.00000 | 2.58756e-26 | 1.00000 |
| rad28 | 1.66254e-27 | 1.00000 | 1.66263e-27 | 1.00000 |
| rad22 | 3.32103e-28 | 1.00000 | 3.32120e-28 | 1.00000 |
| rad5  | 8.54034e-31 | 1.00000 | 8.54074e-31 | 1.00000 |

0.100000000E-08 Pa, 1200.00000 K

=====

| Rate constant             | True (fraction)       | Effective (fraction)  |
|---------------------------|-----------------------|-----------------------|
| Total                     | 3.72623e-12 (1.00 )   | 3.72576e-12 (1.00 )   |
| Formation of rad19        | 2.86288e-12 (0.768 )  | 2.86245e-12 (0.768 )  |
| H-abstraction to cyc2enyl | 6.53266e-13 (0.175 )  | 6.53266e-13 (0.175 )  |
| H-abstraction to cyclenyl | 2.10085e-13 (0.0564 ) | 2.10053e-13 (0.0564 ) |

| species                       | PYtrue      | Cumul    | PYeffective | Cumul    |
|-------------------------------|-------------|----------|-------------|----------|
| Indene+H                      | 0.687506    | 0.687506 | 0.687593    | 0.687593 |
| Benzene+cycloprop-2-enylidene | 0.175315    | 0.862821 | 0.175337    | 0.862930 |
| PhCHCCH2+H                    | 0.0694470   | 0.932268 | 0.0694557   | 0.932386 |
| Benzene+cycloprop-1-enylidene | 0.0563801   | 0.988648 | 0.0563786   | 0.988764 |
| Ph+MeAc                       | 0.00227272  | 0.990921 | 0.00227301  | 0.991037 |
| C2H2+PhCH2                    | 0.00219121  | 0.993112 | 0.00219148  | 0.993229 |
| Ph+Allene                     | 0.00207994  | 0.995192 | 0.00208020  | 0.995309 |
| PhCH2CCH+H                    | 0.00110691  | 0.996299 | 0.00110706  | 0.996416 |
| PhCCCH3+H                     | 0.00101200  | 0.997311 | 0.00101213  | 0.997428 |
| rad67                         | 0.000806305 | 0.998117 | 0.000806406 | 0.998235 |
| PhCCH+CH3                     | 0.000645716 | 0.998763 | 0.000645798 | 0.998880 |
| PhcycC3H3_A+H                 | 0.000345598 | 0.999109 | 0.000345641 | 0.999226 |
| rad35                         | 0.000290169 | 0.999399 | 0.000290206 | 0.999516 |
| PhcycC3H3_B+H                 | 0.000261273 | 0.999660 | 0.000261306 | 0.999778 |
| Phenyl+cycC3H4                | 0.000117514 | 0.999778 | 0.000000    | 0.999778 |
| PAH7+H                        | 6.09151e-05 | 0.999838 | 6.09229e-05 | 0.999839 |
| rad37                         | 5.50993e-05 | 0.999894 | 5.51063e-05 | 0.999894 |
| PAH10+CH3                     | 4.81021e-05 | 0.999942 | 4.81082e-05 | 0.999942 |
| PAH9+H                        | 1.22285e-05 | 0.999954 | 1.22300e-05 | 0.999954 |
| rad38                         | 1.12958e-05 | 0.999965 | 1.12972e-05 | 0.999965 |
| rad39                         | 1.06983e-05 | 0.999976 | 1.06996e-05 | 0.999976 |
| rad30                         | 1.03391e-05 | 0.999986 | 1.03403e-05 | 0.999986 |
| PAH3+H                        | 6.91379e-06 | 0.999993 | 6.91466e-06 | 0.999993 |
| rad46                         | 1.50176e-06 | 0.999995 | 1.50195e-06 | 0.999995 |
| rad50                         | 8.20642e-07 | 0.999995 | 8.20743e-07 | 0.999996 |
| rad54                         | 7.81497e-07 | 0.999996 | 7.81598e-07 | 0.999996 |
| rad60syn                      | 7.65102e-07 | 0.999997 | 7.65199e-07 | 0.999997 |
| rad59                         | 7.35018e-07 | 0.999998 | 7.35111e-07 | 0.999998 |
| PAH1+H                        | 6.15259e-07 | 0.999998 | 6.15337e-07 | 0.999998 |
| rad60anti                     | 4.66711e-07 | 0.999999 | 4.66769e-07 | 0.999999 |
| rad43                         | 2.45550e-07 | 0.999999 | 2.45581e-07 | 0.999999 |
| rad70                         | 1.92605e-07 | 0.999999 | 1.92629e-07 | 0.999999 |
| rad51                         | 1.60721e-07 | 0.999999 | 1.60741e-07 | 1.000000 |
| rad52                         | 5.89508e-08 | 1.000000 | 5.89583e-08 | 1.000000 |
| rad55                         | 4.99974e-08 | 1.000000 | 5.00038e-08 | 1.000000 |
| rad58                         | 4.53331e-08 | 1.000000 | 4.53389e-08 | 1.000000 |
| rad34                         | 3.98655e-08 | 1.000000 | 3.98705e-08 | 1.000000 |
| rad61                         | 3.33579e-08 | 1.000000 | 3.33621e-08 | 1.000000 |
| rad62                         | 2.11968e-08 | 1.000000 | 2.11994e-08 | 1.000000 |
| rad41                         | 1.09917e-08 | 1.000000 | 1.09931e-08 | 1.000000 |
| rad53                         | 7.65059e-09 | 1.000000 | 7.65156e-09 | 1.000000 |
| rad56                         | 5.79402e-09 | 1.000000 | 5.79474e-09 | 1.000000 |
| rad65                         | 4.84114e-09 | 1.000000 | 4.84175e-09 | 1.000000 |
| PAH8+H                        | 4.08163e-09 | 1.000000 | 4.08215e-09 | 1.000000 |
| rad64                         | 2.59994e-09 | 1.000000 | 2.60027e-09 | 1.000000 |
| rad68syn                      | 1.43965e-09 | 1.000000 | 1.43983e-09 | 1.000000 |
| rad73                         | 1.32831e-09 | 1.000000 | 1.32847e-09 | 1.000000 |
| rad71                         | 1.32075e-09 | 1.000000 | 1.32091e-09 | 1.000000 |
| rad42                         | 1.07985e-09 | 1.000000 | 1.07999e-09 | 1.000000 |
| rad68anti                     | 9.46805e-10 | 1.000000 | 9.46926e-10 | 1.000000 |
| rad40syn                      | 8.05959e-10 | 1.000000 | 8.06061e-10 | 1.000000 |
| rad40anti                     | 6.21769e-10 | 1.000000 | 6.21848e-10 | 1.000000 |
| rad72                         | 2.08613e-11 | 1.000000 | 2.08640e-11 | 1.000000 |
| rad9                          | 2.91849e-15 | 1.000000 | 2.91886e-15 | 1.000000 |
| rad12                         | 7.13600e-18 | 1.000000 | 7.13690e-18 | 1.000000 |
| rad15                         | 3.77475e-19 | 1.000000 | 3.77523e-19 | 1.000000 |
| rad23                         | 3.35814e-19 | 1.000000 | 3.35857e-19 | 1.000000 |
| rad45                         | 2.15836e-19 | 1.000000 | 2.15863e-19 | 1.000000 |

|           |             |          |             |          |
|-----------|-------------|----------|-------------|----------|
| rad19anti | 1.93811e-19 | 1.000000 | 1.93836e-19 | 1.000000 |
| rad2      | 1.20661e-19 | 1.000000 | 1.20676e-19 | 1.000000 |
| rad1      | 3.55717e-20 | 1.000000 | 3.55762e-20 | 1.000000 |
| rad8      | 2.53541e-20 | 1.000000 | 2.53574e-20 | 1.000000 |
| rad36     | 2.22958e-20 | 1.000000 | 2.22986e-20 | 1.000000 |
| rad21     | 2.06285e-20 | 1.000000 | 2.06311e-20 | 1.000000 |
| rad13     | 1.26206e-20 | 1.000000 | 1.26222e-20 | 1.000000 |
| rad19syn  | 1.13955e-20 | 1.000000 | 1.13970e-20 | 1.000000 |
| rad11     | 9.72512e-21 | 1.000000 | 9.72640e-21 | 1.000000 |
| rad6      | 6.85700e-21 | 1.000000 | 6.85787e-21 | 1.000000 |
| rad20     | 5.30461e-21 | 1.000000 | 5.30528e-21 | 1.000000 |
| rad10     | 2.05232e-21 | 1.000000 | 2.05258e-21 | 1.000000 |
| rad33     | 1.49700e-21 | 1.000000 | 1.49719e-21 | 1.000000 |
| rad24     | 1.18501e-21 | 1.000000 | 1.18516e-21 | 1.000000 |
| rad3      | 9.35196e-22 | 1.000000 | 9.35309e-22 | 1.000000 |
| rad4      | 8.02318e-22 | 1.000000 | 8.02419e-22 | 1.000000 |
| rad7      | 6.82547e-22 | 1.000000 | 6.82633e-22 | 1.000000 |
| rad25     | 2.92600e-22 | 1.000000 | 2.92637e-22 | 1.000000 |
| rad18     | 1.64154e-22 | 1.000000 | 1.64175e-22 | 1.000000 |
| rad27     | 1.52386e-22 | 1.000000 | 1.52405e-22 | 1.000000 |
| rad31     | 2.55729e-23 | 1.000000 | 2.55762e-23 | 1.000000 |
| rad14     | 1.32731e-23 | 1.000000 | 1.32747e-23 | 1.000000 |
| rad47     | 1.43379e-24 | 1.000000 | 1.43397e-24 | 1.000000 |
| rad26     | 5.20500e-25 | 1.000000 | 5.20566e-25 | 1.000000 |
| rad28     | 9.28842e-27 | 1.000000 | 9.28963e-27 | 1.000000 |
| rad22     | 4.38025e-28 | 1.000000 | 4.38080e-28 | 1.000000 |
| rad5      | 4.22231e-29 | 1.000000 | 4.22284e-29 | 1.000000 |

0.100000000E-08 Pa, 1300.00000 K

| Rate constant             | True (fraction)       | Effective (fraction)  |
|---------------------------|-----------------------|-----------------------|
| Total                     | 4.84401e-12 (1.00 )   | 4.84262e-12 (1.00 )   |
| Formation of rad19        | 3.55537e-12 (0.734 )  | 3.55411e-12 (0.734 )  |
| H-abstraction to cyc2enyl | 9.48893e-13 (0.196 )  | 9.48893e-13 (0.196 )  |
| H-abstraction to cyclenyl | 3.39740e-13 (0.0701 ) | 3.39620e-13 (0.0701 ) |

| species                       | PYtrue      | Cumul    | PYeffective | Cumul    |
|-------------------------------|-------------|----------|-------------|----------|
| Indene+H                      | 0.627161    | 0.627161 | 0.627340    | 0.627340 |
| Benzene+cycloprop-2-enylidene | 0.195890    | 0.823052 | 0.195946    | 0.823286 |
| PhCHCCH2+H                    | 0.0908777   | 0.913929 | 0.0909037   | 0.914190 |
| Benzene+cycloprop-1-enylidene | 0.0701362   | 0.984065 | 0.0701313   | 0.984321 |
| Ph+MeAc                       | 0.00304441  | 0.987110 | 0.00304527  | 0.987366 |
| C2H2+PhCH2                    | 0.00290372  | 0.990014 | 0.00290454  | 0.990271 |
| Ph+Allene                     | 0.00288470  | 0.992898 | 0.00288553  | 0.993157 |
| PhCH2CCH+H                    | 0.00165448  | 0.994553 | 0.00165495  | 0.994812 |
| PhCCCH3+H                     | 0.00130153  | 0.995854 | 0.00130190  | 0.996113 |
| rad67                         | 0.00110883  | 0.996963 | 0.00110915  | 0.997223 |
| PhCCH+CH3                     | 0.000809514 | 0.997773 | 0.000809751 | 0.998032 |
| PhcycC3H3_A+H                 | 0.000673391 | 0.998446 | 0.000673584 | 0.998706 |
| PhcycC3H3_B+H                 | 0.000561394 | 0.999007 | 0.000561554 | 0.999267 |
| rad35                         | 0.000398725 | 0.999406 | 0.000398838 | 0.999666 |
| Phenyl+cycC3H4                | 0.000260506 | 0.999667 | 0.000000    | 0.999666 |
| PAH10+CH3                     | 8.38007e-05 | 0.999750 | 8.38250e-05 | 0.999750 |
| PAH7+H                        | 7.89117e-05 | 0.999829 | 7.89341e-05 | 0.999829 |
| rad37                         | 7.83568e-05 | 0.999908 | 7.83785e-05 | 0.999907 |
| PAH9+H                        | 2.08511e-05 | 0.999929 | 2.08571e-05 | 0.999928 |
| rad38                         | 1.88167e-05 | 0.999947 | 1.88221e-05 | 0.999947 |
| rad30                         | 1.49360e-05 | 0.999962 | 1.49402e-05 | 0.999962 |
| rad39                         | 1.33374e-05 | 0.999976 | 1.33412e-05 | 0.999975 |
| PAH3+H                        | 1.25732e-05 | 0.999988 | 1.25768e-05 | 0.999988 |
| rad46                         | 2.73965e-06 | 0.999991 | 2.74043e-06 | 0.999991 |
| rad50                         | 1.75696e-06 | 0.999993 | 1.75746e-06 | 0.999992 |
| rad59                         | 1.29584e-06 | 0.999994 | 1.29620e-06 | 0.999994 |
| rad60syn                      | 1.24692e-06 | 0.999995 | 1.24728e-06 | 0.999995 |
| rad54                         | 1.23055e-06 | 0.999996 | 1.23091e-06 | 0.999996 |
| PAH1+H                        | 1.18164e-06 | 0.999998 | 1.18197e-06 | 0.999997 |
| rad60anti                     | 7.66599e-07 | 0.999998 | 7.66824e-07 | 0.999998 |
| rad43                         | 4.10006e-07 | 0.999999 | 4.10123e-07 | 0.999999 |
| rad51                         | 3.87406e-07 | 0.999999 | 3.87517e-07 | 0.999999 |
| rad70                         | 3.43677e-07 | 1.000000 | 3.43775e-07 | 0.999999 |
| rad52                         | 1.33628e-07 | 1.000000 | 1.33666e-07 | 0.999999 |
| rad58                         | 9.48433e-08 | 1.000000 | 9.48705e-08 | 1.000000 |
| rad55                         | 8.22139e-08 | 1.000000 | 8.22375e-08 | 1.000000 |
| rad34                         | 7.56235e-08 | 1.000000 | 7.56447e-08 | 1.000000 |
| rad61                         | 7.45086e-08 | 1.000000 | 7.45298e-08 | 1.000000 |
| rad62                         | 3.23565e-08 | 1.000000 | 3.23657e-08 | 1.000000 |
| rad41                         | 2.13212e-08 | 1.000000 | 2.13273e-08 | 1.000000 |
| rad53                         | 1.49188e-08 | 1.000000 | 1.49231e-08 | 1.000000 |

|           |             |         |             |          |
|-----------|-------------|---------|-------------|----------|
| rad56     | 1.23746e-08 | 1.00000 | 1.23782e-08 | 1.000000 |
| rad65     | 1.15036e-08 | 1.00000 | 1.15069e-08 | 1.000000 |
| PAH8+H    | 1.11832e-08 | 1.00000 | 1.11864e-08 | 1.000000 |
| rad64     | 5.02551e-09 | 1.00000 | 5.02694e-09 | 1.000000 |
| rad71     | 4.76253e-09 | 1.00000 | 4.76388e-09 | 1.000000 |
| rad73     | 4.36513e-09 | 1.00000 | 4.36638e-09 | 1.000000 |
| rad68syn  | 3.35945e-09 | 1.00000 | 3.36041e-09 | 1.000000 |
| rad68anti | 2.20311e-09 | 1.00000 | 2.20373e-09 | 1.000000 |
| rad40syn  | 2.06131e-09 | 1.00000 | 2.06190e-09 | 1.000000 |
| rad42     | 1.87919e-09 | 1.00000 | 1.87972e-09 | 1.000000 |
| rad40anti | 1.60444e-09 | 1.00000 | 1.60490e-09 | 1.000000 |
| rad72     | 9.34613e-11 | 1.00000 | 9.34878e-11 | 1.000000 |
| rad9      | 1.93793e-15 | 1.00000 | 1.93848e-15 | 1.000000 |
| rad12     | 5.89852e-18 | 1.00000 | 5.90020e-18 | 1.000000 |
| rad15     | 9.39068e-19 | 1.00000 | 9.39333e-19 | 1.000000 |
| rad23     | 3.04322e-19 | 1.00000 | 3.04409e-19 | 1.000000 |
| rad45     | 2.02820e-19 | 1.00000 | 2.02878e-19 | 1.000000 |
| rad19anti | 1.48394e-19 | 1.00000 | 1.48436e-19 | 1.000000 |
| rad2      | 8.93752e-20 | 1.00000 | 8.94006e-20 | 1.000000 |
| rad11     | 5.69959e-20 | 1.00000 | 5.70122e-20 | 1.000000 |
| rad8      | 4.42248e-20 | 1.00000 | 4.42375e-20 | 1.000000 |
| rad21     | 3.03536e-20 | 1.00000 | 3.03622e-20 | 1.000000 |
| rad1      | 2.65831e-20 | 1.00000 | 2.65907e-20 | 1.000000 |
| rad13     | 2.24558e-20 | 1.00000 | 2.24623e-20 | 1.000000 |
| rad36     | 2.10868e-20 | 1.00000 | 2.10929e-20 | 1.000000 |
| rad6      | 1.44633e-20 | 1.00000 | 1.44674e-20 | 1.000000 |
| rad19syn  | 1.00706e-20 | 1.00000 | 1.00735e-20 | 1.000000 |
| rad7      | 8.18623e-21 | 1.00000 | 8.18859e-21 | 1.000000 |
| rad20     | 7.38165e-21 | 1.00000 | 7.38377e-21 | 1.000000 |
| rad10     | 6.34883e-21 | 1.00000 | 6.35065e-21 | 1.000000 |
| rad33     | 1.76734e-21 | 1.00000 | 1.76784e-21 | 1.000000 |
| rad18     | 1.53527e-21 | 1.00000 | 1.53571e-21 | 1.000000 |
| rad24     | 1.53474e-21 | 1.00000 | 1.53518e-21 | 1.000000 |
| rad3      | 6.61624e-22 | 1.00000 | 6.61812e-22 | 1.000000 |
| rad25     | 5.66799e-22 | 1.00000 | 5.66960e-22 | 1.000000 |
| rad4      | 5.63163e-22 | 1.00000 | 5.63324e-22 | 1.000000 |
| rad27     | 2.70870e-22 | 1.00000 | 2.70948e-22 | 1.000000 |
| rad31     | 2.62744e-23 | 1.00000 | 2.62819e-23 | 1.000000 |
| rad14     | 2.40834e-23 | 1.00000 | 2.40903e-23 | 1.000000 |
| rad26     | 1.20964e-23 | 1.00000 | 1.20998e-23 | 1.000000 |
| rad47     | 3.40948e-24 | 1.00000 | 3.41046e-24 | 1.000000 |
| rad28     | 1.65863e-25 | 1.00000 | 1.65911e-25 | 1.000000 |
| rad22     | 1.07579e-26 | 1.00000 | 1.07610e-26 | 1.000000 |
| rad5      | 2.36370e-27 | 1.00000 | 2.36438e-27 | 1.000000 |

0.100000000E-08 Pa, 1400.00000 K

| Rate constant             | True (fraction)      | Effective (fraction) |
|---------------------------|----------------------|----------------------|
| Total                     | 6.19360e-12 (1.00)   | 6.18997e-12 (1.00)   |
| Formation of rad19        | 4.34185e-12 (0.701)  | 4.33861e-12 (0.701)  |
| H-abstraction to cyc2enyl | 1.32990e-12 (0.215)  | 1.32990e-12 (0.215)  |
| H-abstraction to cyclenyl | 5.21850e-13 (0.0843) | 5.21461e-13 (0.0842) |

| species                       | PYtrue      | Cumul    | PYeffective | Cumul    |
|-------------------------------|-------------|----------|-------------|----------|
| Indene+H                      | 0.566028    | 0.566028 | 0.566360    | 0.566360 |
| Benzene+cycloprop-2-enylidene | 0.214721    | 0.780749 | 0.214847    | 0.781207 |
| PhCHCCH2+H                    | 0.113526    | 0.894275 | 0.113593    | 0.894800 |
| Benzene+cycloprop-1-enylidene | 0.0842564   | 0.978532 | 0.0842429   | 0.979043 |
| Ph+MeAc                       | 0.00387284  | 0.982405 | 0.00387511  | 0.982918 |
| Ph+Allene                     | 0.00376036  | 0.986165 | 0.00376256  | 0.986680 |
| C2H2+PhCH2                    | 0.00367929  | 0.989844 | 0.00368145  | 0.990362 |
| PhCH2CCH+H                    | 0.00231297  | 0.992157 | 0.00231433  | 0.992676 |
| PhCCCH3+H                     | 0.00159640  | 0.993754 | 0.00159734  | 0.994274 |
| rad67                         | 0.00144409  | 0.995198 | 0.00144494  | 0.995719 |
| PhcycC3H3_A+H                 | 0.00120489  | 0.996403 | 0.00120559  | 0.996924 |
| PhcycC3H3_B+H                 | 0.00109183  | 0.997495 | 0.00109247  | 0.998017 |
| PhCCH+CH3                     | 0.000988680 | 0.998483 | 0.000989264 | 0.999006 |
| Phenyl+cycC3H4                | 0.000523345 | 0.999007 | 0.000523345 | 0.999006 |
| rad35                         | 0.000519418 | 0.999526 | 0.000519722 | 0.999526 |
| PAH10+CH3                     | 0.000132940 | 0.999659 | 0.000133019 | 0.999659 |
| rad37                         | 0.000103969 | 0.999763 | 0.000104030 | 0.999763 |
| PAH7+H                        | 9.76629e-05 | 0.999861 | 9.77202e-05 | 0.999860 |
| PAH9+H                        | 3.30451e-05 | 0.999894 | 3.30646e-05 | 0.999893 |
| rad38                         | 2.89869e-05 | 0.999923 | 2.90039e-05 | 0.999922 |
| PAH3+H                        | 2.09773e-05 | 0.999944 | 2.09896e-05 | 0.999943 |
| rad30                         | 2.03484e-05 | 0.999964 | 2.03603e-05 | 0.999964 |
| rad39                         | 1.60326e-05 | 0.999980 | 1.60420e-05 | 0.999980 |
| rad46                         | 4.60489e-06 | 0.999985 | 4.60759e-06 | 0.999984 |

|           |             |          |             |          |
|-----------|-------------|----------|-------------|----------|
| rad50     | 3.39256e-06 | 0.999988 | 3.39455e-06 | 0.999988 |
| rad59     | 2.10237e-06 | 0.999990 | 2.10360e-06 | 0.999990 |
| PAH1+H    | 2.05214e-06 | 0.999992 | 2.05334e-06 | 0.999992 |
| rad60syn  | 1.88965e-06 | 0.999994 | 1.89076e-06 | 0.999994 |
| rad54     | 1.78086e-06 | 0.999996 | 1.78190e-06 | 0.999996 |
| rad60anti | 1.16973e-06 | 0.999997 | 1.17042e-06 | 0.999997 |
| rad51     | 8.27129e-07 | 0.999998 | 8.27613e-07 | 0.999998 |
| rad43     | 6.31782e-07 | 0.999998 | 6.32153e-07 | 0.999998 |
| rad70     | 5.60217e-07 | 0.999999 | 5.60546e-07 | 0.999999 |
| rad52     | 2.70713e-07 | 0.999999 | 2.70872e-07 | 0.999999 |
| rad58     | 1.78428e-07 | 0.999999 | 1.78532e-07 | 0.999999 |
| rad61     | 1.46277e-07 | 1.000000 | 1.46363e-07 | 0.999999 |
| rad34     | 1.30056e-07 | 1.000000 | 1.30132e-07 | 1.000000 |
| rad55     | 1.23571e-07 | 1.000000 | 1.23644e-07 | 1.000000 |
| rad62     | 4.61529e-08 | 1.000000 | 4.61799e-08 | 1.000000 |
| rad41     | 3.74002e-08 | 1.000000 | 3.74221e-08 | 1.000000 |
| PAH8+H    | 2.63148e-08 | 1.000000 | 2.63303e-08 | 1.000000 |
| rad53     | 2.60384e-08 | 1.000000 | 2.60537e-08 | 1.000000 |
| rad65     | 2.42340e-08 | 1.000000 | 2.42482e-08 | 1.000000 |
| rad56     | 2.33522e-08 | 1.000000 | 2.33659e-08 | 1.000000 |
| rad71     | 1.41523e-08 | 1.000000 | 1.41606e-08 | 1.000000 |
| rad73     | 1.20322e-08 | 1.000000 | 1.20393e-08 | 1.000000 |
| rad64     | 8.79755e-09 | 1.000000 | 8.80273e-09 | 1.000000 |
| rad68syn  | 6.90097e-09 | 1.000000 | 6.90502e-09 | 1.000000 |
| rad40syn  | 4.57744e-09 | 1.000000 | 4.58013e-09 | 1.000000 |
| rad68anti | 4.51464e-09 | 1.000000 | 4.51729e-09 | 1.000000 |
| rad40anti | 3.59045e-09 | 1.000000 | 3.59256e-09 | 1.000000 |
| rad42     | 3.00666e-09 | 1.000000 | 3.00843e-09 | 1.000000 |
| rad72     | 3.28506e-10 | 1.000000 | 3.28699e-10 | 1.000000 |
| rad9      | 1.23903e-15 | 1.000000 | 1.23976e-15 | 1.000000 |
| rad12     | 4.68956e-18 | 1.000000 | 4.69231e-18 | 1.000000 |
| rad15     | 3.61795e-18 | 1.000000 | 3.62007e-18 | 1.000000 |
| rad45     | 1.65169e-19 | 1.000000 | 1.65265e-19 | 1.000000 |
| rad11     | 1.44856e-19 | 1.000000 | 1.44940e-19 | 1.000000 |
| rad19anti | 1.15118e-19 | 1.000000 | 1.15186e-19 | 1.000000 |
| rad2      | 5.73824e-20 | 1.000000 | 5.74160e-20 | 1.000000 |
| rad8      | 5.66687e-20 | 1.000000 | 5.67019e-20 | 1.000000 |
| rad21     | 3.67060e-20 | 1.000000 | 3.67275e-20 | 1.000000 |
| rad7      | 3.48129e-20 | 1.000000 | 3.48333e-20 | 1.000000 |
| rad13     | 2.61024e-20 | 1.000000 | 2.61177e-20 | 1.000000 |
| rad6      | 2.57232e-20 | 1.000000 | 2.57383e-20 | 1.000000 |
| rad10     | 2.53178e-20 | 1.000000 | 2.53327e-20 | 1.000000 |
| rad1      | 1.90776e-20 | 1.000000 | 1.90888e-20 | 1.000000 |
| rad36     | 1.86900e-20 | 1.000000 | 1.87009e-20 | 1.000000 |
| rad19syn  | 8.90593e-21 | 1.000000 | 8.91116e-21 | 1.000000 |
| rad20     | 8.28826e-21 | 1.000000 | 8.29310e-21 | 1.000000 |
| rad18     | 5.37818e-21 | 1.000000 | 5.38134e-21 | 1.000000 |
| rad24     | 1.80313e-21 | 1.000000 | 1.80420e-21 | 1.000000 |
| rad33     | 1.72625e-21 | 1.000000 | 1.72727e-21 | 1.000000 |
| rad25     | 7.72646e-22 | 1.000000 | 7.73097e-22 | 1.000000 |
| rad3      | 4.69486e-22 | 1.000000 | 4.69762e-22 | 1.000000 |
| rad4      | 3.95907e-22 | 1.000000 | 3.96139e-22 | 1.000000 |
| rad27     | 3.50744e-22 | 1.000000 | 3.50950e-22 | 1.000000 |
| rad26     | 2.23027e-22 | 1.000000 | 2.23159e-22 | 1.000000 |
| rad14     | 3.02573e-23 | 1.000000 | 3.02750e-23 | 1.000000 |
| rad31     | 2.62635e-23 | 1.000000 | 2.62789e-23 | 1.000000 |
| rad47     | 7.15113e-24 | 1.000000 | 7.15531e-24 | 1.000000 |
| rad28     | 2.99810e-24 | 1.000000 | 2.99986e-24 | 1.000000 |
| rad22     | 8.42447e-25 | 1.000000 | 8.42942e-25 | 1.000000 |
| rad5      | 1.05660e-25 | 1.000000 | 1.05722e-25 | 1.000000 |
| rad23     | 3.03373e-26 | 1.000000 | 3.03551e-26 | 1.000000 |

0.100000000E-08 Pa, 1500.00000 K

=====

| Rate constant             | True (fraction)       | Effective (fraction)  |
|---------------------------|-----------------------|-----------------------|
| Total                     | 7.80417e-12 (1.00 )   | 7.79561e-12 (1.00 )   |
| Formation of rad19        | 5.22661e-12 (0.670 )  | 5.21915e-12 (0.669 )  |
| H-abstraction to cyc2enyl | 1.80920e-12 (0.232 )  | 1.80920e-12 (0.232 )  |
| H-abstraction to cyclenyl | 7.68359e-13 (0.0985 ) | 7.67262e-13 (0.0984 ) |

| species                       | PYtrue     | Cumul    | PYeffective | Cumul    |
|-------------------------------|------------|----------|-------------|----------|
| Indene+H                      | 0.505870   | 0.505870 | 0.506425    | 0.506425 |
| Benzene+cycloprop-2-enylidene | 0.231825   | 0.737695 | 0.232079    | 0.738505 |
| PhCHCCH2+H                    | 0.135967   | 0.873662 | 0.136116    | 0.874621 |
| Benzene+cycloprop-1-enylidene | 0.0984549  | 0.972117 | 0.0984223   | 0.973043 |
| Ph+MeAc                       | 0.00470570 | 0.976823 | 0.00471086  | 0.977754 |
| Ph+Allene                     | 0.00464760 | 0.981470 | 0.00465271  | 0.982407 |
| C2H2+PhCH2                    | 0.00447301 | 0.985943 | 0.00447791  | 0.986885 |

|                |             |          |             |          |
|----------------|-------------|----------|-------------|----------|
| PhCH2CCH+H     | 0.00304819  | 0.988991 | 0.00305154  | 0.989936 |
| PhcycC3H3_A+H  | 0.00198976  | 0.990981 | 0.00199195  | 0.991928 |
| PhcycC3H3_B+H  | 0.00193280  | 0.992914 | 0.00193492  | 0.993863 |
| PhCCCH3+H      | 0.00187667  | 0.994791 | 0.00187873  | 0.995742 |
| rad67          | 0.00179097  | 0.996582 | 0.00179294  | 0.997535 |
| PhCCH+CH3      | 0.00117783  | 0.997759 | 0.00117912  | 0.998714 |
| Phenyl+cycC3H4 | 0.000956146 | 0.998716 | 0.000000    | 0.998714 |
| rad35          | 0.000644848 | 0.999360 | 0.000645555 | 0.999360 |
| PAH10+CH3      | 0.000194190 | 0.999555 | 0.000194404 | 0.999554 |
| rad37          | 0.000129806 | 0.999684 | 0.000129949 | 0.999684 |
| PAH7+H         | 0.000116417 | 0.999801 | 0.000116546 | 0.999800 |
| PAH9+H         | 4.88535e-05 | 0.999850 | 4.89071e-05 | 0.999849 |
| rad38          | 4.16011e-05 | 0.999891 | 4.16467e-05 | 0.999891 |
| PAH3+H         | 3.23374e-05 | 0.999924 | 3.23729e-05 | 0.999923 |
| rad30          | 2.62808e-05 | 0.999950 | 2.63097e-05 | 0.999950 |
| rad39          | 1.87895e-05 | 0.999969 | 1.88102e-05 | 0.999968 |
| rad46          | 7.16199e-06 | 0.999976 | 7.16986e-06 | 0.999976 |
| rad50          | 5.93797e-06 | 0.999982 | 5.94449e-06 | 0.999982 |
| PAH1+H         | 3.25722e-06 | 0.999985 | 3.26081e-06 | 0.999985 |
| rad59          | 3.16156e-06 | 0.999988 | 3.16503e-06 | 0.999988 |
| rad60syn       | 2.67968e-06 | 0.999991 | 2.68262e-06 | 0.999991 |
| rad54          | 2.39838e-06 | 0.999993 | 2.40102e-06 | 0.999993 |
| rad60anti      | 1.66867e-06 | 0.999995 | 1.67050e-06 | 0.999995 |
| rad51          | 1.57342e-06 | 0.999996 | 1.57515e-06 | 0.999996 |
| rad43          | 9.05576e-07 | 0.999997 | 9.06568e-07 | 0.999997 |
| rad70          | 8.42763e-07 | 0.999998 | 8.43688e-07 | 0.999998 |
| rad52          | 4.92950e-07 | 0.999999 | 4.93491e-07 | 0.999999 |
| rad58          | 3.04448e-07 | 0.999999 | 3.04782e-07 | 0.999999 |
| rad61          | 2.56145e-07 | 0.999999 | 2.56426e-07 | 0.999999 |
| rad34          | 2.04934e-07 | 1.000000 | 2.05159e-07 | 0.999999 |
| rad55          | 1.72012e-07 | 1.000000 | 1.72201e-07 | 1.000000 |
| rad62          | 6.20586e-08 | 1.000000 | 6.21267e-08 | 1.000000 |
| rad41          | 5.99063e-08 | 1.000000 | 5.99721e-08 | 1.000000 |
| PAH8+H         | 5.38671e-08 | 1.000000 | 5.39262e-08 | 1.000000 |
| rad65          | 4.55485e-08 | 1.000000 | 4.55985e-08 | 1.000000 |
| rad53          | 4.12866e-08 | 1.000000 | 4.13319e-08 | 1.000000 |
| rad56          | 3.95671e-08 | 1.000000 | 3.96105e-08 | 1.000000 |
| rad71          | 3.49994e-08 | 1.000000 | 3.50378e-08 | 1.000000 |
| rad73          | 2.80690e-08 | 1.000000 | 2.80998e-08 | 1.000000 |
| rad64          | 1.41255e-08 | 1.000000 | 1.41409e-08 | 1.000000 |
| rad68syn       | 1.26336e-08 | 1.000000 | 1.26475e-08 | 1.000000 |
| rad40syn       | 8.93581e-09 | 1.000000 | 8.94564e-09 | 1.000000 |
| rad68anti      | 8.24821e-09 | 1.000000 | 8.25726e-09 | 1.000000 |
| rad40anti      | 7.05383e-09 | 1.000000 | 7.06153e-09 | 1.000000 |
| rad42          | 4.46777e-09 | 1.000000 | 4.47268e-09 | 1.000000 |
| rad72          | 9.20557e-10 | 1.000000 | 9.21571e-10 | 1.000000 |
| rad9           | 7.84189e-16 | 1.000000 | 7.85054e-16 | 1.000000 |
| rad15          | 7.46885e-18 | 1.000000 | 7.47702e-18 | 1.000000 |
| rad12          | 3.66370e-18 | 1.000000 | 3.66772e-18 | 1.000000 |
| rad11          | 2.20544e-19 | 1.000000 | 2.20786e-19 | 1.000000 |
| rad45          | 1.50181e-19 | 1.000000 | 1.50346e-19 | 1.000000 |
| rad19anti      | 9.04718e-20 | 1.000000 | 9.05717e-20 | 1.000000 |
| rad7           | 7.03595e-20 | 1.000000 | 7.04366e-20 | 1.000000 |
| rad8           | 6.24614e-20 | 1.000000 | 6.25299e-20 | 1.000000 |
| rad10          | 5.30414e-20 | 1.000000 | 5.30997e-20 | 1.000000 |
| rad6           | 4.43868e-20 | 1.000000 | 4.44355e-20 | 1.000000 |
| rad2           | 4.13194e-20 | 1.000000 | 4.13648e-20 | 1.000000 |
| rad21          | 3.97611e-20 | 1.000000 | 3.98048e-20 | 1.000000 |
| rad13          | 2.43538e-20 | 1.000000 | 2.43805e-20 | 1.000000 |
| rad36          | 1.71054e-20 | 1.000000 | 1.71242e-20 | 1.000000 |
| rad1           | 1.40923e-20 | 1.000000 | 1.41077e-20 | 1.000000 |
| rad18          | 1.01390e-20 | 1.000000 | 1.01502e-20 | 1.000000 |
| rad20          | 8.29636e-21 | 1.000000 | 8.30546e-21 | 1.000000 |
| rad19syn       | 7.89908e-21 | 1.000000 | 7.90771e-21 | 1.000000 |
| rad26          | 2.48490e-21 | 1.000000 | 2.48763e-21 | 1.000000 |
| rad24          | 1.99082e-21 | 1.000000 | 1.99301e-21 | 1.000000 |
| rad33          | 1.52243e-21 | 1.000000 | 1.52410e-21 | 1.000000 |
| rad25          | 8.67515e-22 | 1.000000 | 8.68467e-22 | 1.000000 |
| rad27          | 3.81185e-22 | 1.000000 | 3.81603e-22 | 1.000000 |
| rad3           | 3.28974e-22 | 1.000000 | 3.29336e-22 | 1.000000 |
| rad4           | 2.75155e-22 | 1.000000 | 2.75457e-22 | 1.000000 |
| rad28          | 3.88219e-23 | 1.000000 | 3.88646e-23 | 1.000000 |
| rad14          | 3.12704e-23 | 1.000000 | 3.13047e-23 | 1.000000 |
| rad22          | 3.02519e-23 | 1.000000 | 3.02852e-23 | 1.000000 |
| rad31          | 2.56266e-23 | 1.000000 | 2.56547e-23 | 1.000000 |
| rad47          | 1.33181e-23 | 1.000000 | 1.33327e-23 | 1.000000 |
| rad5           | 2.77114e-24 | 1.000000 | 2.77419e-24 | 1.000000 |
| rad23          | 2.73064e-24 | 1.000000 | 2.73364e-24 | 1.000000 |

## Tabulated effective product yields for the major products

- The re-dissociation fractions listed below are the yields prior to factoring out re-dissociation.
- N/A denotes calculations using a mechanism that did not include the product/intermediate. This is mainly in low-temperature reaction conditions where the energy ceiling used was below the ground state energy of some of the energetically higher-lying isomers and transition states.

Indene+H

=====

| Pa\K        | 20.0000     | 30.0000     | 40.0000     | 50.0000     | 60.0000     |
|-------------|-------------|-------------|-------------|-------------|-------------|
| 1.00000e+08 | 3.05043e-15 | 4.29381e-14 | 1.83189e-13 | 4.95117e-13 | 1.05377e-12 |
| 1.00000e+07 | 1.18820e-11 | 1.15109e-10 | 4.00181e-10 | 9.46509e-10 | 1.83064e-09 |
| 1.00000e+06 | 1.56117e-08 | 1.22927e-07 | 3.84564e-07 | 8.43007e-07 | 1.53106e-06 |
| 100000.     | 1.00723e-05 | 5.42413e-05 | 0.000127356 | 0.000221073 | 0.000329619 |
| 10000.0     | 0.00103985  | 0.00264028  | 0.00421703  | 0.00576702  | 0.00730292  |
| 1000.00     | 0.0152977   | 0.0311564   | 0.0462645   | 0.0608785   | 0.0751456   |
| 100.000     | 0.145930    | 0.270875    | 0.372835    | 0.457811    | 0.529570    |
| 10.0000     | 0.768565    | 0.935094    | 0.977790    | 0.991211    | 0.996076    |
| 1.00000     | 0.999672    | 0.999773    | 0.999769    | 0.999764    | 0.999759    |
| 0.100000    | 0.999773    | 0.999771    | 0.999768    | 0.999763    | 0.999759    |
| 0.0100000   | 0.999772    | 0.999770    | 0.999767    | 0.999763    | 0.999758    |
| 0.00100000  | 0.999772    | 0.999770    | 0.999767    | 0.999763    | 0.999758    |
| 0.000100000 | 0.999772    | 0.999770    | 0.999767    | 0.999763    | 0.999758    |
| 1.00000e-05 | 0.999772    | 0.999770    | 0.999767    | 0.999763    | 0.999758    |
| 1.00000e-06 | 0.999772    | 0.999770    | 0.999767    | 0.999763    | 0.999758    |
| 1.00000e-07 | 0.999772    | 0.999770    | 0.999767    | 0.999763    | 0.999758    |
| 1.00000e-08 | 0.999772    | 0.999770    | 0.999767    | 0.999763    | 0.999758    |
| 1.00000e-09 | 0.999772    | 0.999770    | 0.999767    | 0.999763    | 0.999758    |

| Pa\K        | 70.0000     | 80.0000     | 90.0000     | 100.000     | 110.000     |
|-------------|-------------|-------------|-------------|-------------|-------------|
| 1.00000e+08 | 1.93940e-12 | 3.24061e-12 | 5.05815e-12 | 7.50962e-12 | 1.07353e-11 |
| 1.00000e+07 | 3.13173e-09 | 4.93610e-09 | 7.34127e-09 | 1.04603e-08 | 1.44273e-08 |
| 1.00000e+06 | 2.47709e-06 | 3.70819e-06 | 5.25218e-06 | 7.13904e-06 | 9.40231e-06 |
| 100000.     | 0.000449332 | 0.000577972 | 0.000714214 | 0.000857342 | 0.00100707  |
| 10000.0     | 0.00883576  | 0.0103751   | 0.0119296   | 0.0135071   | 0.0151155   |
| 1000.00     | 0.0891722   | 0.103045    | 0.116836    | 0.130608    | 0.144418    |
| 100.000     | 0.590757    | 0.643325    | 0.688759    | 0.728211    | 0.762593    |
| 10.0000     | 0.998038    | 0.998897    | 0.999299    | 0.999496    | 0.999596    |
| 1.00000     | 0.999754    | 0.999748    | 0.999742    | 0.999736    | 0.999729    |
| 0.100000    | 0.999753    | 0.999748    | 0.999742    | 0.999735    | 0.999728    |
| 0.0100000   | 0.999753    | 0.999747    | 0.999741    | 0.999735    | 0.999728    |
| 0.00100000  | 0.999753    | 0.999747    | 0.999741    | 0.999735    | 0.999728    |
| 0.000100000 | 0.999753    | 0.999747    | 0.999741    | 0.999735    | 0.999728    |
| 1.00000e-05 | 0.999753    | 0.999747    | 0.999741    | 0.999735    | 0.999728    |
| 1.00000e-06 | 0.999753    | 0.999747    | 0.999741    | 0.999735    | 0.999728    |
| 1.00000e-07 | 0.999753    | 0.999747    | 0.999741    | 0.999735    | 0.999728    |
| 1.00000e-08 | 0.999753    | 0.999747    | 0.999741    | 0.999735    | 0.999728    |
| 1.00000e-09 | 0.999753    | 0.999747    | 0.999741    | 0.999735    | 0.999728    |

| Pa\K        | 120.000     | 130.000     | 140.000     | 150.000     | 160.000     |
|-------------|-------------|-------------|-------------|-------------|-------------|
| 1.00000e+08 | 1.49059e-11 | 2.02328e-11 | 2.69817e-11 | 3.54905e-11 | 4.61950e-11 |
| 1.00000e+07 | 1.94037e-08 | 2.55876e-08 | 3.32245e-08 | 4.26222e-08 | 5.41699e-08 |
| 1.00000e+06 | 1.20804e-05 | 1.52183e-05 | 1.88688e-05 | 2.30943e-05 | 2.79689e-05 |
| 100000.     | 0.00116343  | 0.00132672  | 0.00149744  | 0.00167631  | 0.00186418  |
| 10000.0     | 0.0167626   | 0.0184568   | 0.0202070   | 0.0220227   | 0.0239146   |
| 1000.00     | 0.158319    | 0.172361    | 0.186597    | 0.201075    | 0.215848    |
| 100.000     | 0.792642    | 0.818961    | 0.842048    | 0.862323    | 0.880135    |
| 10.0000     | 0.999646    | 0.999671    | 0.999680    | 0.999680    | 0.999673    |
| 1.00000     | 0.999722    | 0.999714    | 0.999704    | 0.999693    | 0.999680    |
| 0.100000    | 0.999721    | 0.999713    | 0.999703    | 0.999692    | 0.999679    |
| 0.0100000   | 0.999721    | 0.999713    | 0.999703    | 0.999692    | 0.999679    |
| 0.00100000  | 0.999721    | 0.999713    | 0.999703    | 0.999692    | 0.999679    |
| 0.000100000 | 0.999721    | 0.999713    | 0.999703    | 0.999692    | 0.999679    |
| 1.00000e-05 | 0.999721    | 0.999713    | 0.999703    | 0.999692    | 0.999679    |
| 1.00000e-06 | 0.999721    | 0.999713    | 0.999703    | 0.999692    | 0.999679    |
| 1.00000e-07 | 0.999721    | 0.999713    | 0.999703    | 0.999692    | 0.999679    |
| 1.00000e-08 | 0.999721    | 0.999713    | 0.999703    | 0.999692    | 0.999679    |
| 1.00000e-09 | 0.999721    | 0.999713    | 0.999703    | 0.999692    | 0.999679    |

| Pa\K        | 170.000     | 180.000     | 190.000     | 200.000     | 210.000     |
|-------------|-------------|-------------|-------------|-------------|-------------|
| 1.00000e+08 | 5.96620e-11 | 7.66375e-11 | 9.81135e-11 | 1.25424e-10 | 1.60389e-10 |

|             |             |             |             |             |             |
|-------------|-------------|-------------|-------------|-------------|-------------|
| 1.00000e+07 | 6.83637e-08 | 8.58407e-08 | 1.07424e-07 | 1.34189e-07 | 1.67542e-07 |
| 1.00000e+06 | 3.35802e-05 | 4.00310e-05 | 4.74426e-05 | 5.59565e-05 | 6.57377e-05 |
| 100000.     | 0.00206213  | 0.00227135  | 0.00249324  | 0.00272933  | 0.00298135  |
| 10000.0     | 0.0258942   | 0.0279736   | 0.0301664   | 0.0324870   | 0.0349513   |
| 1000.00     | 0.230962    | 0.246465    | 0.262402    | 0.278814    | 0.295735    |
| 100.000     | 0.895784    | 0.909525    | 0.921577    | 0.932129    | 0.941350    |
| 10.0000     | 0.999659    | 0.999639    | 0.999609    | 0.999569    | 0.999515    |
| 1.00000     | 0.999662    | 0.999639    | 0.999608    | 0.999566    | 0.999512    |
| 0.100000    | 0.999661    | 0.999638    | 0.999606    | 0.999565    | 0.999511    |
| 0.0100000   | 0.999661    | 0.999638    | 0.999606    | 0.999565    | 0.999511    |
| 0.00100000  | 0.999661    | 0.999638    | 0.999606    | 0.999565    | 0.999511    |
| 0.000100000 | 0.999661    | 0.999638    | 0.999606    | 0.999565    | 0.999511    |
| 1.00000e-05 | 0.999661    | 0.999638    | 0.999606    | 0.999565    | 0.999511    |
| 1.00000e-06 | 0.999661    | 0.999638    | 0.999606    | 0.999565    | 0.999511    |
| 1.00000e-07 | 0.999661    | 0.999638    | 0.999606    | 0.999565    | 0.999511    |
| 1.00000e-08 | 0.999661    | 0.999638    | 0.999606    | 0.999565    | 0.999511    |
| 1.00000e-09 | 0.999661    | 0.999638    | 0.999606    | 0.999565    | 0.999511    |

Pa\K | 220.000 230.000 240.000 250.000 260.000

|             |             |             |             |             |             |
|-------------|-------------|-------------|-------------|-------------|-------------|
| 1.00000e+08 | 2.05521e-10 | 2.64359e-10 | 3.41978e-10 | 4.45808e-10 | 5.86951e-10 |
| 1.00000e+07 | 2.09352e-07 | 2.62119e-07 | 3.29225e-07 | 4.15291e-07 | 5.26703e-07 |
| 1.00000e+06 | 7.69777e-05 | 8.98986e-05 | 0.000104756 | 0.000121846 | 0.000141506 |
| 100000.     | 0.00325117  | 0.00354093  | 0.00385289  | 0.00418961  | 0.00455385  |
| 10000.0     | 0.0375760   | 0.0403791   | 0.0433801   | 0.0465996   | 0.0500597   |
| 1000.00     | 0.313195    | 0.331217    | 0.349813    | 0.368989    | 0.388736    |
| 100.000     | 0.949384    | 0.956361    | 0.962397    | 0.967595    | 0.972048    |
| 10.0000     | 0.999445    | 0.999356    | 0.999246    | 0.999112    | 0.998951    |
| 1.00000     | 0.999442    | 0.999353    | 0.999243    | 0.999108    | 0.998947    |
| 0.100000    | 0.999441    | 0.999352    | 0.999242    | 0.999107    | 0.998946    |
| 0.0100000   | 0.999441    | 0.999352    | 0.999242    | 0.999107    | 0.998946    |
| 0.00100000  | 0.999441    | 0.999352    | 0.999241    | 0.999107    | 0.998946    |
| 0.000100000 | 0.999441    | 0.999352    | 0.999241    | 0.999107    | 0.998946    |
| 1.00000e-05 | 0.999441    | 0.999352    | 0.999241    | 0.999107    | 0.998946    |
| 1.00000e-06 | 0.999441    | 0.999352    | 0.999241    | 0.999107    | 0.998946    |
| 1.00000e-07 | 0.999441    | 0.999352    | 0.999241    | 0.999107    | 0.998946    |
| 1.00000e-08 | 0.999441    | 0.999352    | 0.999241    | 0.999107    | 0.998946    |
| 1.00000e-09 | 0.999441    | 0.999352    | 0.999241    | 0.999107    | 0.998946    |

Pa\K | 270.000 280.000 290.000 300.000 310.000

|             |             |             |             |             |             |
|-------------|-------------|-------------|-------------|-------------|-------------|
| 1.00000e+08 | 7.82276e-10 | 1.05754e-09 | 1.45169e-09 | 3.59185e-08 | 2.84806e-09 |
| 1.00000e+07 | 6.72333e-07 | 8.64490e-07 | 1.12004e-06 | 7.95408e-06 | 1.91702e-06 |
| 1.00000e+06 | 0.000164125 | 0.000190148 | 0.000220082 | 0.000499726 | 0.000293989 |
| 100000.     | 0.00494865  | 0.00537736  | 0.00584364  | 0.00914137  | 0.00690434  |
| 10000.0     | 0.0537839   | 0.0577973   | 0.0621265   | 0.0907095   | 0.0718339   |
| 1000.00     | 0.409035    | 0.429857    | 0.451157    | 0.547206    | 0.494886    |
| 100.000     | 0.975840    | 0.979046    | 0.981732    | 0.984247    | 0.985650    |
| 10.0000     | 0.998761    | 0.998540    | 0.998288    | 0.997940    | 0.997542    |
| 1.00000     | 0.998757    | 0.998536    | 0.998284    | 0.997940    | 0.997537    |
| 0.100000    | 0.998755    | 0.998535    | 0.998283    | 0.997939    | 0.997536    |
| 0.0100000   | 0.998755    | 0.998535    | 0.998282    | 0.997939    | 0.997536    |
| 0.00100000  | 0.998755    | 0.998535    | 0.998282    | 0.997939    | 0.997536    |
| 0.000100000 | 0.998755    | 0.998535    | 0.998282    | 0.997939    | 0.997536    |
| 1.00000e-05 | 0.998755    | 0.998535    | 0.998282    | 0.997939    | 0.997536    |
| 1.00000e-06 | 0.998755    | 0.998535    | 0.998282    | 0.997939    | 0.997536    |
| 1.00000e-07 | 0.998755    | 0.998535    | 0.998282    | 0.997939    | 0.997536    |
| 1.00000e-08 | 0.998755    | 0.998535    | 0.998282    | 0.997939    | 0.997536    |
| 1.00000e-09 | 0.998755    | 0.998535    | 0.998282    | 0.997939    | 0.997536    |

Pa\K | 400.000 500.000 600.000 700.000 800.000

|             |             |            |           |           |           |
|-------------|-------------|------------|-----------|-----------|-----------|
| 1.00000e+08 | 6.11330e-05 | 0.00576294 | 0.0253512 | 0.0463548 | 0.0411843 |
| 1.00000e+07 | 0.000316068 | 0.00797187 | 0.0718785 | 0.180552  | 0.196864  |
| 1.00000e+06 | 0.00228419  | 0.0141918  | 0.0973961 | 0.272056  | 0.324300  |
| 100000.     | 0.0237164   | 0.0749465  | 0.243216  | 0.469524  | 0.518201  |
| 10000.0     | 0.194254    | 0.387679   | 0.615472  | 0.741188  | 0.737041  |
| 1000.00     | 0.748260    | 0.869997   | 0.908945  | 0.899418  | 0.862335  |
| 100.000     | 0.988033    | 0.977049   | 0.956351  | 0.927124  | 0.889712  |
| 10.0000     | 0.991685    | 0.978429   | 0.957269  | 0.928229  | 0.891732  |
| 1.00000     | 0.991683    | 0.978429   | 0.957276  | 0.928259  | 0.891843  |
| 0.100000    | 0.991683    | 0.978428   | 0.957276  | 0.928261  | 0.891851  |
| 0.0100000   | 0.991683    | 0.978428   | 0.957276  | 0.928261  | 0.891852  |
| 0.00100000  | 0.991683    | 0.978428   | 0.957276  | 0.928261  | 0.891852  |
| 0.000100000 | 0.991683    | 0.978428   | 0.957276  | 0.928261  | 0.891852  |
| 1.00000e-05 | 0.991683    | 0.978428   | 0.957276  | 0.928261  | 0.891852  |
| 1.00000e-06 | 0.991683    | 0.978428   | 0.957276  | 0.928261  | 0.891852  |
| 1.00000e-07 | 0.991683    | 0.978428   | 0.957276  | 0.928261  | 0.891852  |
| 1.00000e-08 | 0.991683    | 0.978428   | 0.957276  | 0.928261  | 0.891852  |
| 1.00000e-09 | 0.991683    | 0.978428   | 0.957276  | 0.928261  | 0.891852  |



| Pa\K        | 900.000   | 1000.00   | 1100.00   | 1200.00    | 1300.00    |
|-------------|-----------|-----------|-----------|------------|------------|
| 1.00000e+08 | 0.0219951 | 0.0132601 | 0.0102174 | 0.00885528 | 0.00780952 |
| 1.00000e+07 | 0.143620  | 0.102854  | 0.0844127 | 0.0761004  | 0.0717966  |
| 1.00000e+06 | 0.314116  | 0.294900  | 0.273123  | 0.256772   | 0.245697   |
| 100000.     | 0.485183  | 0.453225  | 0.427644  | 0.409846   | 0.396915   |
| 10000.0     | 0.686920  | 0.634424  | 0.598581  | 0.572553   | 0.545135   |
| 1000.00     | 0.814090  | 0.763239  | 0.715714  | 0.667321   | 0.614886   |
| 100.000     | 0.845288  | 0.795690  | 0.742354  | 0.685562   | 0.626161   |
| 10.0000     | 0.848431  | 0.799250  | 0.745208  | 0.687410   | 0.627235   |
| 1.00000     | 0.848680  | 0.799564  | 0.745466  | 0.687576   | 0.627331   |
| 0.100000    | 0.848701  | 0.799594  | 0.745490  | 0.687591   | 0.627339   |
| 0.0100000   | 0.848703  | 0.799596  | 0.745492  | 0.687593   | 0.627340   |
| 0.00100000  | 0.848703  | 0.799596  | 0.745493  | 0.687593   | 0.627340   |
| 0.000100000 | 0.848703  | 0.799596  | 0.745493  | 0.687593   | 0.627340   |
| 1.00000e-05 | 0.848703  | 0.799596  | 0.745493  | 0.687593   | 0.627340   |
| 1.00000e-06 | 0.848703  | 0.799596  | 0.745493  | 0.687593   | 0.627340   |
| 1.00000e-07 | 0.848703  | 0.799596  | 0.745493  | 0.687593   | 0.627340   |
| 1.00000e-08 | 0.848703  | 0.799596  | 0.745493  | 0.687593   | 0.627340   |
| 1.00000e-09 | 0.848703  | 0.799596  | 0.745493  | 0.687593   | 0.627340   |

| Pa\K        | 1400.00    | 1500.00    | 1750.00   | 2000.00   | 2250.00   |
|-------------|------------|------------|-----------|-----------|-----------|
| 1.00000e+08 | 0.00659743 | 0.00547326 | 0.0107535 | 0.0107704 | 0.0106602 |
| 1.00000e+07 | 0.0685826  | 0.0655718  | 0.0351813 | 0.0356348 | 0.0350140 |
| 1.00000e+06 | 0.237230   | 0.229634   | 0.0963702 | 0.0987662 | 0.0906502 |
| 100000.     | 0.384398   | 0.369369   | 0.231015  | 0.196421  | 0.148740  |
| 10000.0     | 0.511490   | 0.471816   | 0.335711  | 0.243203  | 0.167167  |
| 1000.00     | 0.559176   | 0.502488   | 0.360124  | 0.250980  | 0.169559  |
| 100.000     | 0.565718   | 0.506096   | 0.362951  | 0.251776  | 0.169783  |
| 10.0000     | 0.566304   | 0.506398   | 0.363225  | 0.251851  | 0.169803  |
| 1.00000     | 0.566355   | 0.506423   | 0.363251  | 0.251858  | 0.169805  |
| 0.100000    | 0.566359   | 0.506425   | 0.363254  | 0.251858  | 0.169805  |
| 0.0100000   | 0.566360   | 0.506425   | 0.363254  | 0.251858  | 0.169805  |
| 0.00100000  | 0.566360   | 0.506425   | 0.363254  | 0.251858  | 0.169805  |
| 0.000100000 | 0.566360   | 0.506425   | 0.363254  | 0.251858  | 0.169805  |
| 1.00000e-05 | 0.566360   | 0.506425   | 0.363254  | 0.251858  | 0.169805  |
| 1.00000e-06 | 0.566360   | 0.506425   | 0.363254  | 0.251858  | 0.169805  |
| 1.00000e-07 | 0.566360   | 0.506425   | 0.363254  | 0.251858  | 0.169805  |
| 1.00000e-08 | 0.566360   | 0.506425   | 0.363254  | 0.251858  | 0.169805  |
| 1.00000e-09 | 0.566360   | 0.506425   | 0.363254  | 0.251858  | 0.169805  |

rad9

====

| Pa\K        | 20.0000     | 30.0000     | 40.0000     | 50.0000     | 60.0000     |
|-------------|-------------|-------------|-------------|-------------|-------------|
| 1.00000e+08 | 0.000618618 | 0.00189231  | 0.00334691  | 0.00485849  | 0.00638887  |
| 1.00000e+07 | 0.0151076   | 0.0322834   | 0.0484296   | 0.0637984   | 0.0785768   |
| 1.00000e+06 | 0.154681    | 0.285475    | 0.390676    | 0.477057    | 0.548967    |
| 100000.     | 0.793361    | 0.948121    | 0.982647    | 0.991889    | 0.994626    |
| 10000.0     | 0.995369    | 0.994003    | 0.992663    | 0.991279    | 0.989864    |
| 1000.00     | 0.982279    | 0.966757    | 0.951824    | 0.937329    | 0.923151    |
| 100.000     | 0.852685    | 0.728058    | 0.626285    | 0.541439    | 0.469778    |
| 10.0000     | 0.231071    | 0.0646853   | 0.0220086   | 0.00858330  | 0.00371079  |
| 1.00000     | 0.000111826 | 1.34447e-06 | 8.22218e-08 | 1.08654e-08 | 2.25408e-09 |
| 0.100000    | 9.64569e-12 | 5.54201e-14 | 3.43694e-15 | 5.28593e-16 | 1.31561e-16 |
| 0.0100000   | 1.05891e-18 | 1.51229e-20 | 1.63375e-21 | 3.78722e-22 | 1.31673e-22 |
| 0.00100000  | 2.72422e-24 | 9.83563e-26 | 1.73417e-26 | 5.62657e-27 | 2.53548e-27 |
| 0.000100000 | 1.04992e-28 | 7.43481e-30 | 1.88075e-30 | 7.82736e-31 | 4.27614e-31 |
| 1.00000e-05 | 2.96922e-32 | 3.48953e-33 | 1.16047e-33 | 5.83732e-34 | 3.69364e-34 |
| 1.00000e-06 | 3.83097e-35 | 6.69992e-36 | 2.76854e-36 | 1.62006e-36 | 1.15307e-36 |
| 1.00000e-07 | 1.67379e-37 | 4.13101e-38 | 2.08277e-38 | 1.40776e-38 | 1.12414e-38 |
| 1.00000e-08 | 2.40698e-39 | 9.02921e-40 | 5.77539e-40 | 4.58682e-40 | 4.12633e-40 |
| 1.00000e-09 | 1.27148e-40 | 6.18182e-41 | 4.39066e-41 | 3.69321e-41 | 3.44622e-41 |

| Pa\K        | 70.0000     | 80.0000     | 90.0000     | 100.000     | 110.000     |
|-------------|-------------|-------------|-------------|-------------|-------------|
| 1.00000e+08 | 0.00792644  | 0.00946934  | 0.0110197   | 0.0125815   | 0.0141595   |
| 1.00000e+07 | 0.0929031   | 0.106885    | 0.120609    | 0.134148    | 0.147563    |
| 1.00000e+06 | 0.609457    | 0.660766    | 0.704576    | 0.742183    | 0.774605    |
| 100000.     | 0.995437    | 0.995618    | 0.995580    | 0.995462    | 0.995317    |
| 10000.0     | 0.988426    | 0.986963    | 0.985472    | 0.983949    | 0.982389    |
| 1000.00     | 0.909197    | 0.895385    | 0.881647    | 0.867922    | 0.854155    |
| 100.000     | 0.408668    | 0.356159    | 0.310773    | 0.271360    | 0.237009    |
| 10.0000     | 0.00174001  | 0.000871455 | 0.000460986 | 0.000255404 | 0.000147247 |
| 1.00000     | 6.28831e-10 | 2.16268e-10 | 8.69173e-11 | 3.94106e-11 | 1.96777e-11 |
| 0.100000    | 4.42515e-17 | 1.83183e-17 | 8.83137e-18 | 4.78611e-18 | 2.84641e-18 |
| 0.0100000   | 5.89198e-23 | 3.13311e-23 | 1.88968e-23 | 1.25523e-23 | 9.00442e-24 |

|             |             |             |             |             |             |
|-------------|-------------|-------------|-------------|-------------|-------------|
| 0.00100000  | 1.40495e-27 | 8.97903e-28 | 6.37419e-28 | 4.90823e-28 | 4.03512e-28 |
| 0.000100000 | 2.77767e-31 | 2.03559e-31 | 1.63158e-31 | 1.40249e-31 | 1.27607e-31 |
| 1.00000e-05 | 2.70915e-34 | 2.20447e-34 | 1.93890e-34 | 1.81304e-34 | 1.78265e-34 |
| 1.00000e-06 | 9.32227e-37 | 8.24991e-37 | 7.81699e-37 | 7.81968e-37 | 8.18140e-37 |
| 1.00000e-07 | 1.00122e-38 | 9.63882e-39 | 9.84354e-39 | 1.05375e-38 | 1.17315e-38 |
| 1.00000e-08 | 4.03293e-40 | 4.18549e-40 | 4.54976e-40 | 5.13556e-40 | 5.98499e-40 |
| 1.00000e-09 | 3.45518e-41 | 3.65418e-41 | 4.03059e-41 | 4.60287e-41 | 5.41567e-41 |

| Pa\K        | 120.000     | 130.000     | 140.000     | 150.000     | 160.000     |
|-------------|-------------|-------------|-------------|-------------|-------------|
| 1.00000e+08 | 0.0157595   | 0.0173879   | 0.0190516   | 0.0207584   | 0.0225171   |
| 1.00000e+07 | 0.160913    | 0.174249    | 0.187623    | 0.201084    | 0.214684    |
| 1.00000e+06 | 0.802653    | 0.826984    | 0.848135    | 0.866550    | 0.882596    |
| 100000.     | 0.995161    | 0.995000    | 0.994835    | 0.994664    | 0.994487    |
| 10000.0     | 0.980784    | 0.979128    | 0.977411    | 0.975625    | 0.973760    |
| 1000.00     | 0.840294    | 0.826288    | 0.812086    | 0.797638    | 0.782893    |
| 100.000     | 0.206985    | 0.180685    | 0.157611    | 0.137345    | 0.119535    |
| 10.0000     | 8.78868e-05 | 5.40837e-05 | 3.41990e-05 | 2.21590e-05 | 1.46781e-05 |
| 1.00000     | 1.06322e-11 | 6.13674e-12 | 3.74674e-12 | 2.40131e-12 | 1.60585e-12 |
| 0.100000    | 1.82625e-18 | 1.24837e-18 | 9.00704e-19 | 6.81044e-19 | 5.36707e-19 |
| 0.0100000   | 6.88107e-24 | 5.54716e-24 | 4.68376e-24 | 4.12083e-24 | 3.76454e-24 |
| 0.00100000  | 3.50325e-28 | 3.18733e-28 | 3.02276e-28 | 2.97822e-28 | 3.04527e-28 |
| 0.000100000 | 1.21786e-31 | 1.21136e-31 | 1.25002e-31 | 1.33406e-31 | 1.46995e-31 |
| 1.00000e-05 | 1.82897e-34 | 1.94741e-34 | 2.14330e-34 | 2.43116e-34 | 2.83617e-34 |
| 1.00000e-06 | 8.89480e-37 | 1.00025e-36 | 1.15951e-36 | 1.38218e-36 | 1.69112e-36 |
| 1.00000e-07 | 1.35095e-38 | 1.60298e-38 | 1.95441e-38 | 2.44360e-38 | 3.12851e-38 |
| 1.00000e-08 | 7.17343e-40 | 8.81857e-40 | 1.10979e-39 | 1.42777e-39 | 1.87597e-39 |
| 1.00000e-09 | 6.54316e-41 | 8.09866e-41 | 1.02519e-40 | 1.32572e-40 | 1.74980e-40 |

| Pa\K        | 170.000     | 180.000     | 190.000     | 200.000     | 210.000     |
|-------------|-------------|-------------|-------------|-------------|-------------|
| 1.00000e+08 | 0.0243373   | 0.0262298   | 0.0282066   | 0.0302815   | 0.0324699   |
| 1.00000e+07 | 0.228469    | 0.242489    | 0.256793    | 0.271429    | 0.286442    |
| 1.00000e+06 | 0.896585    | 0.908777    | 0.919393    | 0.928622    | 0.936629    |
| 100000.     | 0.994298    | 0.994096    | 0.993875    | 0.993632    | 0.993362    |
| 10000.0     | 0.971800    | 0.969735    | 0.967549    | 0.965224    | 0.962742    |
| 1000.00     | 0.767802    | 0.752316    | 0.736389    | 0.719977    | 0.703043    |
| 100.000     | 0.103883    | 0.0901314   | 0.0780590   | 0.0674735   | 0.0582061   |
| 10.0000     | 9.92023e-06 | 6.82946e-06 | 4.78256e-06 | 3.40278e-06 | 2.45742e-06 |
| 1.00000     | 1.11516e-12 | 8.01035e-13 | 5.93338e-13 | 4.52053e-13 | 3.53540e-13 |
| 0.100000    | 4.38973e-19 | 3.71465e-19 | 3.24531e-19 | 2.92451e-19 | 2.72037e-19 |
| 0.0100000   | 3.56459e-24 | 3.50054e-24 | 3.58152e-24 | 3.86287e-24 | 4.49941e-24 |
| 0.00100000  | 3.23880e-28 | 3.61203e-28 | 4.30384e-28 | 5.67545e-28 | 8.71117e-28 |
| 0.000100000 | 1.67239e-31 | 1.97051e-31 | 2.42493e-31 | 3.17543e-31 | 4.58248e-31 |
| 1.00000e-05 | 3.39804e-34 | 4.17841e-34 | 5.27540e-34 | 6.85423e-34 | 9.22128e-34 |
| 1.00000e-06 | 2.12092e-36 | 2.72401e-36 | 3.58081e-36 | 4.81694e-36 | 6.63394e-36 |
| 1.00000e-07 | 4.09710e-38 | 5.48442e-38 | 7.50054e-38 | 1.04774e-37 | 1.49484e-37 |
| 1.00000e-08 | 2.51572e-39 | 3.44179e-39 | 4.80275e-39 | 6.83521e-39 | 9.92203e-39 |
| 1.00000e-09 | 2.35602e-40 | 3.23501e-40 | 4.52904e-40 | 6.46493e-40 | 9.41007e-40 |

| Pa\K        | 220.000     | 230.000     | 240.000     | 250.000     | 260.000     |
|-------------|-------------|-------------|-------------|-------------|-------------|
| 1.00000e+08 | 0.0347895   | 0.0372608   | 0.0399076   | 0.0427580   | 0.0458450   |
| 1.00000e+07 | 0.301879    | 0.317782    | 0.334191    | 0.351142    | 0.368663    |
| 1.00000e+06 | 0.943554    | 0.949521    | 0.954638    | 0.959002    | 0.962697    |
| 100000.     | 0.993060    | 0.992721    | 0.992339    | 0.991910    | 0.991429    |
| 10000.0     | 0.960085    | 0.957231    | 0.954160    | 0.950846    | 0.947268    |
| 1000.00     | 0.685553    | 0.667485    | 0.648820    | 0.629553    | 0.609689    |
| 100.000     | 0.0501079   | 0.0430465   | 0.0369039   | 0.0315742   | 0.0269622   |
| 10.0000     | 1.79988e-06 | 1.33607e-06 | 1.00462e-06 | 7.64831e-07 | 5.89368e-07 |
| 1.00000     | 2.83375e-13 | 2.32517e-13 | 1.95160e-13 | 1.67515e-13 | 1.47104e-13 |
| 0.100000    | 2.62122e-19 | 2.63798e-19 | 2.81835e-19 | 3.28483e-19 | 4.32879e-19 |
| 0.0100000   | 5.89373e-24 | 9.11119e-24 | 1.70680e-23 | 3.80181e-23 | 9.60141e-23 |
| 0.00100000  | 1.62378e-27 | 3.67241e-27 | 9.65275e-27 | 2.80203e-26 | 8.65752e-26 |
| 0.000100000 | 7.66772e-31 | 1.55425e-30 | 3.81952e-30 | 1.08964e-29 | 3.42390e-29 |
| 1.00000e-05 | 1.30282e-33 | 1.98990e-33 | 3.45148e-33 | 7.19267e-33 | 1.84123e-32 |
| 1.00000e-06 | 9.36809e-36 | 1.36176e-35 | 2.05609e-35 | 3.28879e-35 | 5.78893e-35 |
| 1.00000e-07 | 2.17871e-37 | 3.24564e-37 | 4.94786e-37 | 7.73879e-37 | 1.24893e-36 |
| 1.00000e-08 | 1.46932e-38 | 2.22042e-38 | 3.42568e-38 | 5.39927e-38 | 8.70242e-38 |
| 1.00000e-09 | 1.39696e-39 | 2.11577e-39 | 3.27046e-39 | 5.16189e-39 | 8.32340e-39 |

| Pa\K        | 270.000   | 280.000   | 290.000   | 300.000   | 310.000   |
|-------------|-----------|-----------|-----------|-----------|-----------|
| 1.00000e+08 | 0.0492083 | 0.0528945 | 0.0569585 | 0.0617994 | 0.0664596 |
| 1.00000e+07 | 0.386774  | 0.405484  | 0.424785  | 0.444290  | 0.464946  |
| 1.00000e+06 | 0.965798  | 0.968373  | 0.970482  | 0.968088  | 0.973366  |
| 100000.     | 0.990891  | 0.990290  | 0.989621  | 0.985964  | 0.987923  |
| 10000.0     | 0.943397  | 0.939210  | 0.934677  | 0.930578  | 0.924327  |
| 1000.00     | 0.589244  | 0.568248  | 0.546740  | 0.450394  | 0.502359  |
| 100.000     | 0.0229824 | 0.0195576 | 0.0166186 | 0.0137288 | 0.0119550 |

|             |             |             |             |             |             |
|-------------|-------------|-------------|-------------|-------------|-------------|
| 10.0000     | 4.59575e-07 | 3.62584e-07 | 2.89408e-07 | 2.18485e-06 | 1.90909e-07 |
| 1.00000     | 1.32346e-13 | 1.22356e-13 | 1.16896e-13 | 4.88268e-11 | 1.22844e-13 |
| 0.100000    | 6.64190e-19 | 1.18894e-18 | 2.41444e-18 | 6.99355e-15 | 1.25108e-17 |
| 0.0100000   | 2.62836e-22 | 7.56670e-22 | 2.24928e-21 | 1.16397e-17 | 2.09457e-20 |
| 0.00100000  | 2.78468e-25 | 9.19993e-25 | 3.09337e-24 | 3.08352e-20 | 3.58272e-23 |
| 0.000100000 | 1.14047e-28 | 3.93504e-28 | 1.38704e-27 | 6.25229e-23 | 1.77324e-26 |
| 1.00000e-05 | 5.58811e-32 | 1.89186e-31 | 6.80130e-31 | 4.58176e-25 | 9.45574e-30 |
| 1.00000e-06 | 1.18614e-34 | 2.96201e-34 | 8.94586e-34 | 1.00161e-26 | 1.14606e-32 |
| 1.00000e-07 | 2.10565e-36 | 3.80269e-36 | 7.67595e-36 | 4.44716e-28 | 5.17709e-35 |
| 1.00000e-08 | 1.43698e-37 | 2.43954e-37 | 4.28889e-37 | 3.55368e-29 | 1.57589e-36 |
| 1.00000e-09 | 1.37206e-38 | 2.31421e-38 | 3.99893e-38 | 3.45424e-30 | 1.29700e-37 |

| Pa\K        | 400.000     | 500.000     | 600.000     | 700.000     | 800.000     |
|-------------|-------------|-------------|-------------|-------------|-------------|
| 1.00000e+08 | 0.325766    | 0.812835    | 0.851865    | 0.789717    | 0.767321    |
| 1.00000e+07 | 0.773622    | 0.923690    | 0.826762    | 0.579511    | 0.489163    |
| 1.00000e+06 | 0.973770    | 0.956597    | 0.840502    | 0.551012    | 0.359955    |
| 100000.     | 0.965768    | 0.902052    | 0.707317    | 0.417838    | 0.266963    |
| 10000.0     | 0.796589    | 0.590299    | 0.339221    | 0.175448    | 0.120187    |
| 1000.00     | 0.243384    | 0.108410    | 0.0478824   | 0.0270165   | 0.0234409   |
| 100.000     | 0.00367559  | 0.00138674  | 0.000883513 | 0.000948802 | 0.00148716  |
| 10.0000     | 9.48440e-07 | 1.31405e-06 | 3.63877e-06 | 1.39986e-05 | 5.56803e-05 |
| 1.00000     | 2.44746e-10 | 6.19688e-09 | 3.19426e-08 | 2.56261e-07 | 2.34971e-06 |
| 0.100000    | 2.04223e-12 | 1.62815e-10 | 7.70810e-10 | 7.11733e-09 | 1.22918e-07 |
| 0.0100000   | 2.61173e-14 | 3.00470e-12 | 1.64017e-11 | 2.62750e-10 | 7.58908e-09 |
| 0.00100000  | 1.17021e-16 | 1.86161e-14 | 1.78934e-13 | 1.21406e-11 | 5.29428e-10 |
| 0.000100000 | 2.07335e-19 | 5.51076e-17 | 2.56107e-15 | 6.96092e-13 | 4.04987e-11 |
| 1.00000e-05 | 4.90164e-22 | 2.39472e-19 | 9.72297e-17 | 4.66378e-14 | 3.32703e-12 |
| 1.00000e-06 | 3.90987e-24 | 3.96448e-21 | 5.76903e-18 | 3.57413e-15 | 2.91857e-13 |
| 1.00000e-07 | 1.47568e-25 | 2.15959e-22 | 4.45561e-19 | 3.12165e-16 | 2.73155e-14 |
| 1.00000e-08 | 1.20993e-26 | 1.91468e-23 | 4.20120e-20 | 3.02897e-17 | 2.69204e-15 |
| 1.00000e-09 | 1.18214e-27 | 1.88828e-24 | 4.17248e-21 | 3.01844e-18 | 2.68752e-16 |

| Pa\K        | 900.000     | 1000.00     | 1100.00     | 1200.00     | 1300.00     |
|-------------|-------------|-------------|-------------|-------------|-------------|
| 1.00000e+08 | 0.774743    | 0.760009    | 0.732359    | 0.700671    | 0.667962    |
| 1.00000e+07 | 0.558947    | 0.605905    | 0.606376    | 0.587094    | 0.560234    |
| 1.00000e+06 | 0.285268    | 0.262513    | 0.257421    | 0.249008    | 0.235140    |
| 100000.     | 0.178146    | 0.116968    | 0.0930501   | 0.0821726   | 0.0727301   |
| 10000.0     | 0.0831262   | 0.0500346   | 0.0341686   | 0.0258248   | 0.0194760   |
| 1000.00     | 0.0183469   | 0.0108698   | 0.00656346  | 0.00425121  | 0.00276734  |
| 100.000     | 0.00162412  | 0.00110283  | 0.000674697 | 0.000423824 | 0.000266269 |
| 10.0000     | 0.000101343 | 8.77703e-05 | 5.90703e-05 | 3.82949e-05 | 2.42943e-05 |
| 1.00000     | 6.69493e-06 | 7.16691e-06 | 5.26577e-06 | 3.52717e-06 | 2.26605e-06 |
| 0.100000    | 4.90666e-07 | 6.16186e-07 | 4.84077e-07 | 3.32515e-07 | 2.15737e-07 |
| 0.0100000   | 3.89505e-08 | 5.51031e-08 | 4.55202e-08 | 3.18645e-08 | 2.08266e-08 |
| 0.00100000  | 3.27836e-09 | 5.07054e-09 | 4.35003e-09 | 3.08861e-09 | 2.02988e-09 |
| 0.000100000 | 2.88316e-10 | 4.76640e-10 | 4.20650e-10 | 3.01863e-10 | 1.99209e-10 |
| 1.00000e-05 | 2.62384e-11 | 4.55541e-11 | 4.10497e-11 | 2.96895e-11 | 1.96525e-11 |
| 1.00000e-06 | 2.46474e-12 | 4.42123e-12 | 4.03975e-12 | 2.93705e-12 | 1.94809e-12 |
| 1.00000e-07 | 2.38922e-13 | 4.35706e-13 | 4.00879e-13 | 2.92211e-13 | 1.94017e-13 |
| 1.00000e-08 | 2.37340e-14 | 4.34386e-14 | 4.00257e-14 | 2.91918e-14 | 1.93865e-14 |
| 1.00000e-09 | 2.37159e-15 | 4.34238e-15 | 4.00187e-15 | 2.91886e-15 | 1.93848e-15 |

| Pa\K        | 1400.00     | 1500.00     | 1750.00     | 2000.00     | 2250.00     |
|-------------|-------------|-------------|-------------|-------------|-------------|
| 1.00000e+08 | 0.635381    | 0.604104    | 0.00810657  | 0.00774106  | 0.00726139  |
| 1.00000e+07 | 0.530464    | 0.499788    | 0.00925442  | 0.00819504  | 0.00682977  |
| 1.00000e+06 | 0.218229    | 0.199988    | 0.00770852  | 0.00550610  | 0.00356833  |
| 100000.     | 0.0628076   | 0.0527748   | 0.00341895  | 0.00172863  | 0.000816781 |
| 10000.0     | 0.0142682   | 0.0101842   | 0.000658930 | 0.000252900 | 9.94228e-05 |
| 1000.00     | 0.00178403  | 0.00114522  | 7.41307e-05 | 2.60353e-05 | 9.78737e-06 |
| 100.000     | 0.000166627 | 0.000104582 | 7.28550e-06 | 2.52629e-06 | 9.44371e-07 |
| 10.0000     | 1.52426e-05 | 9.57008e-06 | 7.10380e-07 | 2.46092e-07 | 9.19459e-08 |
| 1.00000     | 1.42919e-06 | 8.99391e-07 | 6.97070e-08 | 2.41520e-08 | 9.02345e-09 |
| 0.100000    | 1.36628e-07 | 8.61390e-08 | 6.87633e-09 | 2.38293e-09 | 8.90284e-10 |
| 0.0100000   | 1.32304e-08 | 8.35266e-09 | 6.80819e-10 | 2.35965e-10 | 8.81589e-11 |
| 0.00100000  | 1.29248e-09 | 8.16795e-10 | 6.75839e-11 | 2.34265e-11 | 8.75257e-12 |
| 0.000100000 | 1.27060e-10 | 8.03579e-11 | 6.72182e-12 | 2.33019e-12 | 8.70626e-13 |
| 1.00000e-05 | 1.25508e-11 | 7.94212e-12 | 6.69535e-13 | 2.32117e-13 | 8.67268e-14 |
| 1.00000e-06 | 1.24519e-12 | 7.88267e-13 | 6.67875e-14 | 2.31565e-14 | 8.65269e-15 |
| 1.00000e-07 | 1.24069e-13 | 7.85596e-14 | 6.67514e-15 | 2.31450e-15 | 8.64867e-16 |
| 1.00000e-08 | 1.23985e-14 | 7.85107e-15 | 6.67472e-16 | 2.31438e-16 | 8.64823e-17 |
| 1.00000e-09 | 1.23976e-15 | 7.85054e-16 | 6.67466e-17 | 2.31436e-17 | 8.64818e-18 |

radl9anti

=====

| Pa\K        | 20.0000  | 30.0000  | 40.0000  | 50.0000  | 60.0000  |
|-------------|----------|----------|----------|----------|----------|
| 1.00000e+08 | 0.863102 | 0.976087 | 0.991065 | 0.992414 | 0.991453 |

|             |             |             |             |             |             |
|-------------|-------------|-------------|-------------|-------------|-------------|
| 1.00000e+07 | 0.983084    | 0.966354    | 0.950561    | 0.935447    | 0.920852    |
| 1.00000e+06 | 0.845198    | 0.714471    | 0.609228    | 0.522788    | 0.450811    |
| 100000.     | 0.205969    | 0.0502700   | 0.0149994   | 0.00519279  | 0.00202138  |
| 10000.0     | 2.90161e-05 | 2.05729e-07 | 5.54634e-08 | 4.12947e-08 | 3.48872e-08 |
| 1000.00     | 1.95189e-08 | 1.18449e-08 | 9.07448e-09 | 7.58235e-09 | 6.62621e-09 |
| 100.000     | 3.97847e-09 | 2.38160e-09 | 1.71001e-09 | 1.31571e-09 | 1.05002e-09 |
| 10.0000     | 3.81731e-10 | 8.41918e-11 | 2.54798e-11 | 9.23458e-12 | 3.79358e-12 |
| 1.00000     | 9.49815e-14 | 1.00148e-15 | 5.77855e-17 | 7.38725e-18 | 1.50080e-18 |
| 0.100000    | 5.94168e-21 | 3.28098e-23 | 2.00937e-24 | 3.07702e-25 | 7.65469e-26 |
| 0.0100000   | 6.08991e-28 | 8.90356e-30 | 1.04556e-30 | 3.05835e-31 | 1.70588e-31 |
| 0.00100000  | 1.95894e-32 | 9.55737e-33 | 7.61547e-33 | 7.59013e-33 | 8.81947e-33 |
| 0.000100000 | 1.76257e-33 | 9.44048e-34 | 7.57842e-34 | 7.56831e-34 | 8.80162e-34 |
| 1.00000e-05 | 1.76088e-34 | 9.43627e-35 | 7.57619e-35 | 7.56665e-35 | 8.80010e-35 |
| 1.00000e-06 | 1.76073e-35 | 9.43586e-36 | 7.57597e-36 | 7.56649e-36 | 8.79995e-36 |
| 1.00000e-07 | 1.76071e-36 | 9.43582e-37 | 7.57595e-37 | 7.56647e-37 | 8.79993e-37 |
| 1.00000e-08 | 1.76071e-37 | 9.43582e-38 | 7.57595e-38 | 7.56647e-38 | 8.79993e-38 |
| 1.00000e-09 | 1.76071e-38 | 9.43582e-39 | 7.57595e-39 | 7.56647e-39 | 8.79993e-39 |

| Pa\K        | 70.0000     | 80.0000     | 90.0000     | 100.000     | 110.000     |
|-------------|-------------|-------------|-------------|-------------|-------------|
| 1.00000e+08 | 0.990039    | 0.988526    | 0.986988    | 0.985437    | 0.983871    |
| 1.00000e+07 | 0.906659    | 0.892776    | 0.879125    | 0.865640    | 0.852266    |
| 1.00000e+06 | 0.390247    | 0.338859    | 0.294966    | 0.257271    | 0.224758    |
| 100000.     | 0.000866393 | 0.000402873 | 0.000201060 | 0.000106838 | 6.00848e-05 |
| 10000.0     | 3.07341e-08 | 2.77473e-08 | 2.54804e-08 | 2.36974e-08 | 2.22583e-08 |
| 1000.00     | 5.95010e-09 | 5.44063e-09 | 5.03933e-09 | 4.71276e-09 | 4.44032e-09 |
| 100.000     | 8.57082e-10 | 7.10284e-10 | 5.95008e-10 | 5.02419e-10 | 4.26794e-10 |
| 10.0000     | 1.71300e-12 | 8.33580e-13 | 4.31187e-13 | 2.34746e-13 | 1.33505e-13 |
| 1.00000     | 4.12960e-19 | 1.40740e-19 | 5.62390e-20 | 2.54190e-20 | 1.26774e-20 |
| 0.100000    | 2.57935e-26 | 1.07143e-26 | 5.19080e-27 | 2.83197e-27 | 1.70079e-27 |
| 0.0100000   | 1.53730e-31 | 1.87446e-31 | 2.72636e-31 | 4.43518e-31 | 7.83710e-31 |
| 0.00100000  | 1.15193e-32 | 1.65425e-32 | 2.57604e-32 | 4.31162e-32 | 7.71212e-32 |
| 0.000100000 | 1.15013e-33 | 1.65214e-33 | 2.57325e-33 | 4.30756e-33 | 7.70569e-33 |
| 1.00000e-05 | 1.14996e-34 | 1.65194e-34 | 2.57298e-34 | 4.30716e-34 | 7.70506e-34 |
| 1.00000e-06 | 1.14994e-35 | 1.65192e-35 | 2.57295e-35 | 4.30712e-35 | 7.70499e-35 |
| 1.00000e-07 | 1.14994e-36 | 1.65192e-36 | 2.57295e-36 | 4.30712e-36 | 7.70499e-36 |
| 1.00000e-08 | 1.14994e-37 | 1.65192e-37 | 2.57295e-37 | 4.30712e-37 | 7.70499e-37 |
| 1.00000e-09 | 1.14994e-38 | 1.65192e-38 | 2.57295e-38 | 4.30712e-38 | 7.70499e-38 |

| Pa\K        | 120.000     | 130.000     | 140.000     | 150.000     | 160.000     |
|-------------|-------------|-------------|-------------|-------------|-------------|
| 1.00000e+08 | 0.982286    | 0.980673    | 0.979026    | 0.977336    | 0.975592    |
| 1.00000e+07 | 0.838947    | 0.825634    | 0.812275    | 0.798825    | 0.785230    |
| 1.00000e+06 | 0.196616    | 0.172188    | 0.150936    | 0.132418    | 0.116262    |
| 100000.     | 3.56022e-05 | 2.21492e-05 | 1.44295e-05 | 9.82331e-06 | 6.97687e-06 |
| 10000.0     | 2.10744e-08 | 2.00863e-08 | 1.92531e-08 | 1.85457e-08 | 1.79433e-08 |
| 1000.00     | 4.20859e-09 | 4.00839e-09 | 3.83326e-09 | 3.67847e-09 | 3.54053e-09 |
| 100.000     | 3.64230e-10 | 3.11950e-10 | 2.67918e-10 | 2.30598e-10 | 1.98812e-10 |
| 10.0000     | 7.88599e-14 | 4.81608e-14 | 3.02980e-14 | 1.95757e-14 | 1.29580e-14 |
| 1.00000     | 6.85419e-21 | 3.96495e-21 | 2.42971e-21 | 1.56519e-21 | 1.05353e-21 |
| 0.100000    | 1.10981e-27 | 7.85949e-28 | 6.17063e-28 | 5.72590e-28 | 6.98912e-28 |
| 0.0100000   | 1.48424e-30 | 2.99293e-30 | 6.40255e-30 | 1.44961e-29 | 3.46726e-29 |
| 0.00100000  | 1.46854e-31 | 2.96901e-31 | 6.36015e-31 | 1.44121e-30 | 3.44918e-30 |
| 0.000100000 | 1.46745e-32 | 2.96700e-32 | 6.35625e-32 | 1.44040e-31 | 3.44740e-31 |
| 1.00000e-05 | 1.46734e-33 | 2.96680e-33 | 6.35586e-33 | 1.44032e-32 | 3.44722e-32 |
| 1.00000e-06 | 1.46733e-34 | 2.96678e-34 | 6.35582e-34 | 1.44032e-33 | 3.44720e-33 |
| 1.00000e-07 | 1.46733e-35 | 2.96678e-35 | 6.35581e-35 | 1.44031e-34 | 3.44720e-34 |
| 1.00000e-08 | 1.46733e-36 | 2.96678e-36 | 6.35581e-36 | 1.44031e-35 | 3.44720e-35 |
| 1.00000e-09 | 1.46733e-37 | 2.96678e-37 | 6.35581e-37 | 1.44031e-36 | 3.44720e-36 |

| Pa\K        | 170.000     | 180.000     | 190.000     | 200.000     | 210.000     |
|-------------|-------------|-------------|-------------|-------------|-------------|
| 1.00000e+08 | 0.973784    | 0.971899    | 0.969923    | 0.967839    | 0.965631    |
| 1.00000e+07 | 0.771444    | 0.757415    | 0.743094    | 0.728431    | 0.713376    |
| 1.00000e+06 | 0.102159    | 0.0898445   | 0.0790965   | 0.0697224   | 0.0615564   |
| 100000.     | 5.16255e-06 | 3.97515e-06 | 3.18166e-06 | 2.64432e-06 | 2.27972e-06 |
| 10000.0     | 1.74301e-08 | 1.69948e-08 | 1.66291e-08 | 1.63270e-08 | 1.60843e-08 |
| 1000.00     | 3.41676e-09 | 3.30513e-09 | 3.20404e-09 | 3.11227e-09 | 3.02887e-09 |
| 100.000     | 1.71631e-10 | 1.48319e-10 | 1.28283e-10 | 1.11034e-10 | 9.61720e-11 |
| 10.0000     | 8.76996e-15 | 6.05850e-15 | 4.26624e-15 | 3.05878e-15 | 2.23091e-15 |
| 1.00000     | 7.37435e-22 | 5.34744e-22 | 4.00524e-22 | 3.09220e-22 | 2.45925e-22 |
| 0.100000    | 1.19280e-27 | 2.66104e-27 | 6.95017e-27 | 1.98428e-26 | 6.00824e-26 |
| 0.0100000   | 8.74613e-29 | 2.32250e-28 | 6.47928e-28 | 1.89455e-27 | 5.79034e-27 |
| 0.00100000  | 8.70447e-30 | 2.31232e-29 | 6.45302e-29 | 1.88743e-28 | 5.77015e-28 |
| 0.000100000 | 8.70033e-31 | 2.31130e-30 | 6.45039e-30 | 1.88672e-29 | 5.76813e-29 |
| 1.00000e-05 | 8.69992e-32 | 2.31120e-31 | 6.45013e-31 | 1.88665e-30 | 5.76793e-30 |
| 1.00000e-06 | 8.69987e-33 | 2.31119e-32 | 6.45010e-32 | 1.88664e-31 | 5.76791e-31 |
| 1.00000e-07 | 8.69987e-34 | 2.31119e-33 | 6.45010e-33 | 1.88664e-32 | 5.76790e-32 |
| 1.00000e-08 | 8.69987e-35 | 2.31119e-34 | 6.45010e-34 | 1.88664e-33 | 5.76790e-33 |
| 1.00000e-09 | 8.69987e-36 | 2.31119e-35 | 6.45010e-35 | 1.88664e-34 | 5.76790e-34 |

| Pa\K        | 220.000     | 230.000     | 240.000     | 250.000     | 260.000     |
|-------------|-------------|-------------|-------------|-------------|-------------|
| 1.00000e+08 | 0.963277    | 0.960752    | 0.958033    | 0.955088    | 0.951882    |
| 1.00000e+07 | 0.697882    | 0.681902    | 0.665396    | 0.648323    | 0.630653    |
| 1.00000e+06 | 0.0544539   | 0.0482887   | 0.0429493   | 0.0383376   | 0.0343663   |
| 100000.     | 2.03665e-06 | 1.88355e-06 | 1.80149e-06 | 1.78004e-06 | 1.81522e-06 |
| 10000.0     | 1.58985e-08 | 1.57685e-08 | 1.56946e-08 | 1.56781e-08 | 1.57215e-08 |
| 1000.00     | 2.95309e-09 | 2.88440e-09 | 2.82237e-09 | 2.76673e-09 | 2.71730e-09 |
| 100.000     | 8.33601e-11 | 7.23147e-11 | 6.27950e-11 | 5.45941e-11 | 4.75336e-11 |
| 10.0000     | 1.65402e-15 | 1.24591e-15 | 9.53139e-16 | 7.40347e-16 | 5.83791e-16 |
| 1.00000     | 2.02186e-22 | 1.74902e-22 | 1.69775e-22 | 2.18081e-22 | 4.40976e-22 |
| 0.100000    | 1.90475e-25 | 6.27935e-25 | 2.14167e-24 | 7.52018e-24 | 2.70468e-23 |
| 0.0100000   | 1.84395e-26 | 6.09627e-26 | 2.08390e-25 | 7.33166e-25 | 2.64159e-24 |
| 0.00100000  | 1.83797e-27 | 6.07793e-27 | 2.07806e-26 | 7.31259e-26 | 2.63520e-25 |
| 0.000100000 | 1.83737e-28 | 6.07609e-28 | 2.07748e-27 | 7.31068e-27 | 2.63456e-26 |
| 1.00000e-05 | 1.83731e-29 | 6.07591e-29 | 2.07742e-28 | 7.31049e-28 | 2.63450e-27 |
| 1.00000e-06 | 1.83731e-30 | 6.07589e-30 | 2.07742e-29 | 7.31047e-29 | 2.63449e-28 |
| 1.00000e-07 | 1.83731e-31 | 6.07588e-31 | 2.07742e-30 | 7.31047e-30 | 2.63449e-29 |
| 1.00000e-08 | 1.83731e-32 | 6.07588e-32 | 2.07742e-31 | 7.31047e-31 | 2.63449e-30 |
| 1.00000e-09 | 1.83731e-33 | 6.07588e-33 | 2.07742e-32 | 7.31047e-32 | 2.63449e-31 |

| Pa\K        | 270.000     | 280.000     | 290.000     | 300.000     | 310.000     |
|-------------|-------------|-------------|-------------|-------------|-------------|
| 1.00000e+08 | 0.948373    | 0.944513    | 0.940246    | 0.912273    | 0.930107    |
| 1.00000e+07 | 0.612364    | 0.593446    | 0.573904    | 0.491852    | 0.533017    |
| 1.00000e+06 | 0.0309581   | 0.0280443   | 0.0255642   | 0.0268310   | 0.0216923   |
| 100000.     | 1.90825e-06 | 2.06542e-06 | 2.29842e-06 | 1.78719e-05 | 3.07133e-06 |
| 10000.0     | 1.58289e-08 | 1.60059e-08 | 1.62598e-08 | 2.18741e-08 | 1.70386e-08 |
| 1000.00     | 2.67394e-09 | 2.63651e-09 | 2.60476e-09 | 2.38622e-09 | 2.55566e-09 |
| 100.000     | 4.14581e-11 | 3.62310e-11 | 3.17315e-11 | 2.75270e-11 | 2.44946e-11 |
| 10.0000     | 4.67296e-16 | 3.79707e-16 | 3.13309e-16 | 4.66794e-15 | 2.26201e-16 |
| 1.00000     | 1.29009e-21 | 4.44470e-21 | 1.61372e-20 | 1.54660e-16 | 2.17295e-19 |
| 0.100000    | 9.90884e-23 | 3.67602e-22 | 1.37225e-21 | 1.47634e-17 | 1.89606e-20 |
| 0.0100000   | 9.69373e-24 | 3.60175e-23 | 1.34645e-22 | 1.46925e-18 | 1.86518e-21 |
| 0.00100000  | 9.67192e-25 | 3.59422e-24 | 1.34383e-23 | 1.46854e-19 | 1.86204e-22 |
| 0.000100000 | 9.66974e-26 | 3.59346e-25 | 1.34357e-24 | 1.46847e-20 | 1.86172e-23 |
| 1.00000e-05 | 9.66952e-27 | 3.59339e-26 | 1.34354e-25 | 1.46846e-21 | 1.86169e-24 |
| 1.00000e-06 | 9.66950e-28 | 3.59338e-27 | 1.34354e-26 | 1.46846e-22 | 1.86169e-25 |
| 1.00000e-07 | 9.66950e-29 | 3.59338e-28 | 1.34354e-27 | 1.46846e-23 | 1.86169e-26 |
| 1.00000e-08 | 9.66950e-30 | 3.59338e-29 | 1.34354e-28 | 1.46846e-24 | 1.86169e-27 |
| 1.00000e-09 | 9.66950e-31 | 3.59338e-30 | 1.34354e-29 | 1.46846e-25 | 1.86169e-28 |

| Pa\K        | 400.000     | 500.000     | 600.000     | 700.000     | 800.000     |
|-------------|-------------|-------------|-------------|-------------|-------------|
| 1.00000e+08 | 0.665246    | 0.146853    | 0.0345184   | 0.0198435   | 0.0192373   |
| 1.00000e+07 | 0.217103    | 0.0424678   | 0.0111440   | 0.00444231  | 0.00327551  |
| 1.00000e+06 | 0.0126688   | 0.00488006  | 0.00219118  | 0.00101060  | 0.000652069 |
| 100000.     | 6.37039e-05 | 0.000140944 | 0.000159533 | 0.000106537 | 7.31249e-05 |
| 10000.0     | 2.57284e-07 | 3.50104e-06 | 9.38274e-06 | 8.86048e-06 | 6.75014e-06 |
| 1000.00     | 4.74287e-09 | 1.49861e-07 | 6.72837e-07 | 7.82406e-07 | 6.37500e-07 |
| 100.000     | 1.12088e-10 | 9.14480e-09 | 5.56067e-08 | 7.27666e-08 | 6.15991e-08 |
| 10.0000     | 5.72756e-12 | 7.19186e-10 | 5.07106e-09 | 7.02689e-09 | 6.05690e-09 |
| 1.00000     | 4.88087e-13 | 6.74275e-11 | 4.95115e-10 | 6.96574e-10 | 6.03180e-10 |
| 0.100000    | 4.77861e-14 | 6.68658e-12 | 4.93612e-11 | 6.95815e-11 | 6.02871e-11 |
| 0.0100000   | 4.76813e-15 | 6.68082e-13 | 4.93458e-12 | 6.95738e-12 | 6.02839e-12 |
| 0.00100000  | 4.76708e-16 | 6.68024e-14 | 4.93443e-13 | 6.95730e-13 | 6.02835e-13 |
| 0.000100000 | 4.76697e-17 | 6.68018e-15 | 4.93441e-14 | 6.95729e-14 | 6.02835e-14 |
| 1.00000e-05 | 4.76696e-18 | 6.68017e-16 | 4.93441e-15 | 6.95729e-15 | 6.02835e-15 |
| 1.00000e-06 | 4.76696e-19 | 6.68017e-17 | 4.93441e-16 | 6.95729e-16 | 6.02835e-16 |
| 1.00000e-07 | 4.76696e-20 | 6.68017e-18 | 4.93441e-17 | 6.95729e-17 | 6.02835e-17 |
| 1.00000e-08 | 4.76696e-21 | 6.68017e-19 | 4.93441e-18 | 6.95729e-18 | 6.02835e-18 |
| 1.00000e-09 | 4.76696e-22 | 6.68017e-20 | 4.93441e-19 | 6.95729e-19 | 6.02835e-19 |

| Pa\K        | 900.000     | 1000.00     | 1100.00     | 1200.00     | 1300.00     |
|-------------|-------------|-------------|-------------|-------------|-------------|
| 1.00000e+08 | 0.0183144   | 0.0168193   | 0.0151791   | 0.0136175   | 0.0122034   |
| 1.00000e+07 | 0.00281231  | 0.00244321  | 0.00210935  | 0.00181029  | 0.00154758  |
| 1.00000e+06 | 0.000483620 | 0.000372611 | 0.000289126 | 0.000225399 | 0.000176906 |
| 100000.     | 5.20702e-05 | 3.82165e-05 | 2.84720e-05 | 2.15098e-05 | 1.64916e-05 |
| 10000.0     | 4.92353e-06 | 3.62909e-06 | 2.70542e-06 | 2.04442e-06 | 1.56723e-06 |
| 1000.00     | 4.74685e-07 | 3.52538e-07 | 2.63544e-07 | 1.99208e-07 | 1.52541e-07 |
| 100.000     | 4.64130e-08 | 3.46121e-08 | 2.59064e-08 | 1.95836e-08 | 1.49921e-08 |
| 10.0000     | 4.58918e-09 | 3.42907e-09 | 2.56858e-09 | 1.94235e-09 | 1.48726e-09 |
| 1.00000     | 4.57673e-10 | 3.42155e-10 | 2.56356e-10 | 1.93882e-10 | 1.48470e-10 |
| 0.100000    | 4.57520e-11 | 3.42064e-11 | 2.56295e-11 | 1.93840e-11 | 1.48440e-11 |
| 0.0100000   | 4.57505e-12 | 3.42054e-12 | 2.56290e-12 | 1.93836e-12 | 1.48437e-12 |
| 0.00100000  | 4.57504e-13 | 3.42054e-13 | 2.56289e-13 | 1.93836e-13 | 1.48436e-13 |
| 0.000100000 | 4.57503e-14 | 3.42054e-14 | 2.56289e-14 | 1.93836e-14 | 1.48436e-14 |
| 1.00000e-05 | 4.57503e-15 | 3.42054e-15 | 2.56289e-15 | 1.93836e-15 | 1.48436e-15 |

|             |             |             |             |             |             |
|-------------|-------------|-------------|-------------|-------------|-------------|
| 1.00000e-06 | 4.57503e-16 | 3.42054e-16 | 2.56289e-16 | 1.93836e-16 | 1.48436e-16 |
| 1.00000e-07 | 4.57503e-17 | 3.42054e-17 | 2.56289e-17 | 1.93836e-17 | 1.48436e-17 |
| 1.00000e-08 | 4.57503e-18 | 3.42054e-18 | 2.56289e-18 | 1.93836e-18 | 1.48436e-18 |
| 1.00000e-09 | 4.57503e-19 | 3.42054e-19 | 2.56289e-19 | 1.93836e-19 | 1.48436e-19 |

| Pa\K        | 1400.00     | 1500.00     | 1750.00 | 2000.00 | 2250.00 |
|-------------|-------------|-------------|---------|---------|---------|
| 1.00000e+08 | 0.0109447   | 0.00983066  | N/A     | N/A     | N/A     |
| 1.00000e+07 | 0.00132026  | 0.00112585  | N/A     | N/A     | N/A     |
| 1.00000e+06 | 0.000140032 | 0.000111931 | N/A     | N/A     | N/A     |
| 100000.     | 1.28320e-05 | 1.01272e-05 | N/A     | N/A     | N/A     |
| 10000.0     | 1.21825e-06 | 9.59565e-07 | N/A     | N/A     | N/A     |
| 1000.00     | 1.18372e-07 | 9.30723e-08 | N/A     | N/A     | N/A     |
| 100.000     | 1.16309e-08 | 9.14341e-09 | N/A     | N/A     | N/A     |
| 10.0000     | 1.15401e-09 | 9.07338e-10 | N/A     | N/A     | N/A     |
| 1.00000     | 1.15211e-10 | 9.05898e-11 | N/A     | N/A     | N/A     |
| 0.100000    | 1.15188e-11 | 9.05731e-12 | N/A     | N/A     | N/A     |
| 0.0100000   | 1.15186e-12 | 9.05717e-13 | N/A     | N/A     | N/A     |
| 0.00100000  | 1.15186e-13 | 9.05717e-14 | N/A     | N/A     | N/A     |
| 0.000100000 | 1.15186e-14 | 9.05717e-15 | N/A     | N/A     | N/A     |
| 1.00000e-05 | 1.15186e-15 | 9.05717e-16 | N/A     | N/A     | N/A     |
| 1.00000e-06 | 1.15186e-16 | 9.05717e-17 | N/A     | N/A     | N/A     |
| 1.00000e-07 | 1.15186e-17 | 9.05717e-18 | N/A     | N/A     | N/A     |
| 1.00000e-08 | 1.15186e-18 | 9.05717e-19 | N/A     | N/A     | N/A     |
| 1.00000e-09 | 1.15186e-19 | 9.05717e-20 | N/A     | N/A     | N/A     |

Benzene+cycloprop-2-enylidene

| Pa\K        | 20.0000     | 30.0000     | 40.0000     | 50.0000     | 60.0000     |
|-------------|-------------|-------------|-------------|-------------|-------------|
| 1.00000e+08 | 3.08591e-46 | 1.33923e-30 | 7.66665e-23 | 3.18404e-18 | 3.61245e-15 |
| 1.00000e+07 | 3.08591e-46 | 1.33923e-30 | 7.66665e-23 | 3.18404e-18 | 3.61245e-15 |
| 1.00000e+06 | 3.08591e-46 | 1.33923e-30 | 7.66665e-23 | 3.18404e-18 | 3.61245e-15 |
| 100000.     | 3.08591e-46 | 1.33923e-30 | 7.66665e-23 | 3.18404e-18 | 3.61245e-15 |
| 10000.0     | 3.08591e-46 | 1.33923e-30 | 7.66665e-23 | 3.18404e-18 | 3.61245e-15 |
| 1000.00     | 3.08591e-46 | 1.33923e-30 | 7.66665e-23 | 3.18404e-18 | 3.61245e-15 |
| 100.000     | 3.08591e-46 | 1.33923e-30 | 7.66665e-23 | 3.18404e-18 | 3.61245e-15 |
| 10.0000     | 3.08591e-46 | 1.33923e-30 | 7.66665e-23 | 3.18404e-18 | 3.61245e-15 |
| 1.00000     | 3.08591e-46 | 1.33923e-30 | 7.66665e-23 | 3.18404e-18 | 3.61245e-15 |
| 0.100000    | 3.08591e-46 | 1.33923e-30 | 7.66665e-23 | 3.18404e-18 | 3.61245e-15 |
| 0.0100000   | 3.08591e-46 | 1.33923e-30 | 7.66665e-23 | 3.18404e-18 | 3.61245e-15 |
| 0.00100000  | 3.08591e-46 | 1.33923e-30 | 7.66665e-23 | 3.18404e-18 | 3.61245e-15 |
| 0.000100000 | 3.08591e-46 | 1.33923e-30 | 7.66665e-23 | 3.18404e-18 | 3.61245e-15 |
| 1.00000e-05 | 3.08591e-46 | 1.33923e-30 | 7.66665e-23 | 3.18404e-18 | 3.61245e-15 |
| 1.00000e-06 | 3.08591e-46 | 1.33923e-30 | 7.66665e-23 | 3.18404e-18 | 3.61245e-15 |
| 1.00000e-07 | 3.08591e-46 | 1.33923e-30 | 7.66665e-23 | 3.18404e-18 | 3.61245e-15 |
| 1.00000e-08 | 3.08591e-46 | 1.33923e-30 | 7.66665e-23 | 3.18404e-18 | 3.61245e-15 |
| 1.00000e-09 | 3.08591e-46 | 1.33923e-30 | 7.66665e-23 | 3.18404e-18 | 3.61245e-15 |

| Pa\K        | 70.0000     | 80.0000     | 90.0000     | 100.000     | 110.000     |
|-------------|-------------|-------------|-------------|-------------|-------------|
| 1.00000e+08 | 5.28015e-13 | 2.15484e-11 | 3.76912e-10 | 3.65179e-09 | 2.30629e-08 |
| 1.00000e+07 | 5.28015e-13 | 2.15484e-11 | 3.76912e-10 | 3.65179e-09 | 2.30629e-08 |
| 1.00000e+06 | 5.28015e-13 | 2.15484e-11 | 3.76912e-10 | 3.65179e-09 | 2.30629e-08 |
| 100000.     | 5.28015e-13 | 2.15484e-11 | 3.76912e-10 | 3.65179e-09 | 2.30629e-08 |
| 10000.0     | 5.28015e-13 | 2.15484e-11 | 3.76912e-10 | 3.65179e-09 | 2.30629e-08 |
| 1000.00     | 5.28015e-13 | 2.15484e-11 | 3.76912e-10 | 3.65179e-09 | 2.30629e-08 |
| 100.000     | 5.28015e-13 | 2.15484e-11 | 3.76912e-10 | 3.65179e-09 | 2.30629e-08 |
| 10.0000     | 5.28015e-13 | 2.15484e-11 | 3.76912e-10 | 3.65179e-09 | 2.30629e-08 |
| 1.00000     | 5.28015e-13 | 2.15484e-11 | 3.76912e-10 | 3.65179e-09 | 2.30629e-08 |
| 0.100000    | 5.28015e-13 | 2.15484e-11 | 3.76912e-10 | 3.65179e-09 | 2.30629e-08 |
| 0.0100000   | 5.28015e-13 | 2.15484e-11 | 3.76912e-10 | 3.65179e-09 | 2.30629e-08 |
| 0.00100000  | 5.28015e-13 | 2.15484e-11 | 3.76912e-10 | 3.65179e-09 | 2.30629e-08 |
| 0.000100000 | 5.28015e-13 | 2.15484e-11 | 3.76912e-10 | 3.65179e-09 | 2.30629e-08 |
| 1.00000e-05 | 5.28015e-13 | 2.15484e-11 | 3.76912e-10 | 3.65179e-09 | 2.30629e-08 |
| 1.00000e-06 | 5.28015e-13 | 2.15484e-11 | 3.76912e-10 | 3.65179e-09 | 2.30629e-08 |
| 1.00000e-07 | 5.28015e-13 | 2.15484e-11 | 3.76912e-10 | 3.65179e-09 | 2.30629e-08 |
| 1.00000e-08 | 5.28015e-13 | 2.15484e-11 | 3.76912e-10 | 3.65179e-09 | 2.30629e-08 |
| 1.00000e-09 | 5.28015e-13 | 2.15484e-11 | 3.76912e-10 | 3.65179e-09 | 2.30629e-08 |

| Pa\K        | 120.000     | 130.000     | 140.000     | 150.000     | 160.000     |
|-------------|-------------|-------------|-------------|-------------|-------------|
| 1.00000e+08 | 1.05797e-07 | 3.79882e-07 | 1.12607e-06 | 2.86508e-06 | 6.44194e-06 |
| 1.00000e+07 | 1.05797e-07 | 3.79882e-07 | 1.12607e-06 | 2.86508e-06 | 6.44194e-06 |
| 1.00000e+06 | 1.05797e-07 | 3.79882e-07 | 1.12607e-06 | 2.86508e-06 | 6.44194e-06 |
| 100000.     | 1.05797e-07 | 3.79882e-07 | 1.12607e-06 | 2.86508e-06 | 6.44194e-06 |
| 10000.0     | 1.05797e-07 | 3.79882e-07 | 1.12607e-06 | 2.86508e-06 | 6.44194e-06 |
| 1000.00     | 1.05797e-07 | 3.79882e-07 | 1.12607e-06 | 2.86508e-06 | 6.44194e-06 |
| 100.000     | 1.05797e-07 | 3.79882e-07 | 1.12607e-06 | 2.86508e-06 | 6.44194e-06 |
| 10.0000     | 1.05797e-07 | 3.79882e-07 | 1.12607e-06 | 2.86508e-06 | 6.44194e-06 |



|             |            |           |           |           |           |
|-------------|------------|-----------|-----------|-----------|-----------|
| 10000.0     | 0.00710133 | 0.0185518 | 0.0355285 | 0.0566520 | 0.0802781 |
| 1000.00     | 0.00710133 | 0.0185518 | 0.0355285 | 0.0566520 | 0.0802781 |
| 100.000     | 0.00710133 | 0.0185518 | 0.0355285 | 0.0566520 | 0.0802781 |
| 10.0000     | 0.00710133 | 0.0185518 | 0.0355285 | 0.0566520 | 0.0802781 |
| 1.00000     | 0.00710133 | 0.0185518 | 0.0355285 | 0.0566520 | 0.0802781 |
| 0.100000    | 0.00710133 | 0.0185518 | 0.0355285 | 0.0566520 | 0.0802781 |
| 0.0100000   | 0.00710133 | 0.0185518 | 0.0355285 | 0.0566520 | 0.0802781 |
| 0.00100000  | 0.00710133 | 0.0185518 | 0.0355285 | 0.0566520 | 0.0802781 |
| 0.000100000 | 0.00710133 | 0.0185518 | 0.0355285 | 0.0566520 | 0.0802781 |
| 1.00000e-05 | 0.00710133 | 0.0185518 | 0.0355285 | 0.0566520 | 0.0802781 |
| 1.00000e-06 | 0.00710133 | 0.0185518 | 0.0355285 | 0.0566520 | 0.0802781 |
| 1.00000e-07 | 0.00710133 | 0.0185518 | 0.0355285 | 0.0566520 | 0.0802781 |
| 1.00000e-08 | 0.00710133 | 0.0185518 | 0.0355285 | 0.0566520 | 0.0802781 |
| 1.00000e-09 | 0.00710133 | 0.0185518 | 0.0355285 | 0.0566520 | 0.0802781 |

| Pa\K        | 900.000  | 1000.00  | 1100.00  | 1200.00  | 1300.00  |
|-------------|----------|----------|----------|----------|----------|
| 1.00000e+08 | 0.105019 | 0.129576 | 0.153218 | 0.175463 | 0.196067 |
| 1.00000e+07 | 0.104941 | 0.129479 | 0.153110 | 0.175352 | 0.195960 |
| 1.00000e+06 | 0.104931 | 0.129467 | 0.153097 | 0.175339 | 0.195948 |
| 100000.     | 0.104930 | 0.129465 | 0.153096 | 0.175338 | 0.195946 |
| 10000.0     | 0.104930 | 0.129465 | 0.153095 | 0.175337 | 0.195946 |
| 1000.00     | 0.104930 | 0.129465 | 0.153095 | 0.175337 | 0.195946 |
| 100.000     | 0.104930 | 0.129465 | 0.153095 | 0.175337 | 0.195946 |
| 10.0000     | 0.104930 | 0.129465 | 0.153095 | 0.175337 | 0.195946 |
| 1.00000     | 0.104930 | 0.129465 | 0.153095 | 0.175337 | 0.195946 |
| 0.100000    | 0.104930 | 0.129465 | 0.153095 | 0.175337 | 0.195946 |
| 0.0100000   | 0.104930 | 0.129465 | 0.153095 | 0.175337 | 0.195946 |
| 0.00100000  | 0.104930 | 0.129465 | 0.153095 | 0.175337 | 0.195946 |
| 0.000100000 | 0.104930 | 0.129465 | 0.153095 | 0.175337 | 0.195946 |
| 1.00000e-05 | 0.104930 | 0.129465 | 0.153095 | 0.175337 | 0.195946 |
| 1.00000e-06 | 0.104930 | 0.129465 | 0.153095 | 0.175337 | 0.195946 |
| 1.00000e-07 | 0.104930 | 0.129465 | 0.153095 | 0.175337 | 0.195946 |
| 1.00000e-08 | 0.104930 | 0.129465 | 0.153095 | 0.175337 | 0.195946 |
| 1.00000e-09 | 0.104930 | 0.129465 | 0.153095 | 0.175337 | 0.195946 |

| Pa\K        | 1400.00  | 1500.00  | 1750.00  | 2000.00  | 2250.00  |
|-------------|----------|----------|----------|----------|----------|
| 1.00000e+08 | 0.214955 | 0.232162 | 0.276957 | 0.304749 | 0.328354 |
| 1.00000e+07 | 0.214859 | 0.232088 | 0.268003 | 0.296636 | 0.321321 |
| 1.00000e+06 | 0.214848 | 0.232080 | 0.267041 | 0.295770 | 0.320575 |
| 100000.     | 0.214847 | 0.232080 | 0.266938 | 0.295677 | 0.320495 |
| 10000.0     | 0.214847 | 0.232079 | 0.266925 | 0.295665 | 0.320486 |
| 1000.00     | 0.214847 | 0.232079 | 0.266923 | 0.295664 | 0.320485 |
| 100.000     | 0.214847 | 0.232079 | 0.266922 | 0.295664 | 0.320485 |
| 10.0000     | 0.214847 | 0.232079 | 0.266922 | 0.295664 | 0.320485 |
| 1.00000     | 0.214847 | 0.232079 | 0.266922 | 0.295664 | 0.320485 |
| 0.100000    | 0.214847 | 0.232079 | 0.266922 | 0.295664 | 0.320485 |
| 0.0100000   | 0.214847 | 0.232079 | 0.266922 | 0.295664 | 0.320485 |
| 0.00100000  | 0.214847 | 0.232079 | 0.266922 | 0.295664 | 0.320485 |
| 0.000100000 | 0.214847 | 0.232079 | 0.266922 | 0.295664 | 0.320485 |
| 1.00000e-05 | 0.214847 | 0.232079 | 0.266922 | 0.295664 | 0.320485 |
| 1.00000e-06 | 0.214847 | 0.232079 | 0.266922 | 0.295664 | 0.320485 |
| 1.00000e-07 | 0.214847 | 0.232079 | 0.266922 | 0.295664 | 0.320485 |
| 1.00000e-08 | 0.214847 | 0.232079 | 0.266922 | 0.295664 | 0.320485 |
| 1.00000e-09 | 0.214847 | 0.232079 | 0.266922 | 0.295664 | 0.320485 |

PhCHCCH2+H

=====

| Pa\K        | 20.0000     | 30.0000     | 40.0000     | 50.0000     | 60.0000     |
|-------------|-------------|-------------|-------------|-------------|-------------|
| 1.00000e+08 | 2.85778e-15 | 1.45265e-14 | 3.73749e-14 | 7.32185e-14 | 1.23852e-13 |
| 1.00000e+07 | 5.81631e-13 | 2.72554e-12 | 6.43346e-12 | 1.17531e-11 | 1.87933e-11 |
| 1.00000e+06 | 7.34848e-11 | 2.94461e-10 | 6.40856e-10 | 1.10517e-09 | 1.68604e-09 |
| 100000.     | 5.49243e-09 | 1.70955e-08 | 3.10469e-08 | 4.64798e-08 | 6.31621e-08 |
| 10000.0     | 1.39772e-07 | 3.08429e-07 | 4.79008e-07 | 6.54982e-07 | 8.38553e-07 |
| 1000.00     | 1.61398e-06 | 3.29241e-06 | 4.96401e-06 | 6.67013e-06 | 8.43255e-06 |
| 100.000     | 1.55690e-05 | 2.99604e-05 | 4.29825e-05 | 5.51549e-05 | 6.67385e-05 |
| 10.0000     | 0.000101218 | 0.000143862 | 0.000166584 | 0.000181775 | 0.000193473 |
| 1.00000     | 0.000199371 | 0.000209655 | 0.000215506 | 0.000220836 | 0.000226156 |
| 0.100000    | 0.000215322 | 0.000217816 | 0.000221123 | 0.000225180 | 0.000229730 |
| 0.0100000   | 0.000217007 | 0.000218649 | 0.000221686 | 0.000225610 | 0.000230082 |
| 0.00100000  | 0.000217172 | 0.000218731 | 0.000221741 | 0.000225653 | 0.000230117 |
| 0.000100000 | 0.000217188 | 0.000218739 | 0.000221747 | 0.000225657 | 0.000230120 |
| 1.00000e-05 | 0.000217190 | 0.000218740 | 0.000221747 | 0.000225658 | 0.000230121 |
| 1.00000e-06 | 0.000217190 | 0.000218740 | 0.000221748 | 0.000225658 | 0.000230121 |
| 1.00000e-07 | 0.000217190 | 0.000218740 | 0.000221748 | 0.000225658 | 0.000230121 |
| 1.00000e-08 | 0.000217190 | 0.000218740 | 0.000221748 | 0.000225658 | 0.000230121 |
| 1.00000e-09 | 0.000217190 | 0.000218740 | 0.000221748 | 0.000225658 | 0.000230121 |



| Pa\K        | 70.0000     | 80.0000     | 90.0000     | 100.000     | 110.000     |
|-------------|-------------|-------------|-------------|-------------|-------------|
| 1.00000e+08 | 1.91337e-13 | 2.78209e-13 | 3.87644e-13 | 5.23665e-13 | 6.91408e-13 |
| 1.00000e+07 | 2.77214e-11 | 3.87695e-11 | 5.22427e-11 | 6.85337e-11 | 8.81455e-11 |
| 1.00000e+06 | 2.38666e-09 | 3.21424e-09 | 4.17979e-09 | 5.29827e-09 | 6.58914e-09 |
| 100000.     | 8.10862e-08 | 1.00353e-07 | 1.21128e-07 | 1.43624e-07 | 1.68107e-07 |
| 10000.0     | 1.03171e-06 | 1.23653e-06 | 1.45528e-06 | 1.69044e-06 | 1.94487e-06 |
| 1000.00     | 1.02695e-05 | 1.21993e-05 | 1.42412e-05 | 1.64158e-05 | 1.87461e-05 |
| 100.000     | 7.79138e-05 | 8.88249e-05 | 9.95910e-05 | 0.000110315 | 0.000121090 |
| 10.0000     | 0.000203377 | 0.000212328 | 0.000220798 | 0.000229075 | 0.000237358 |
| 1.00000     | 0.000231618 | 0.000237305 | 0.000243276 | 0.000249579 | 0.000256261 |
| 0.100000    | 0.000234673 | 0.000239986 | 0.000245673 | 0.000251752 | 0.000258254 |
| 0.0100000   | 0.000234973 | 0.000240249 | 0.000245907 | 0.000251964 | 0.000258449 |
| 0.00100000  | 0.000235003 | 0.000240275 | 0.000245930 | 0.000251986 | 0.000258468 |
| 0.000100000 | 0.000235006 | 0.000240277 | 0.000245933 | 0.000251988 | 0.000258470 |
| 1.00000e-05 | 0.000235006 | 0.000240278 | 0.000245933 | 0.000251988 | 0.000258470 |
| 1.00000e-06 | 0.000235006 | 0.000240278 | 0.000245933 | 0.000251988 | 0.000258470 |
| 1.00000e-07 | 0.000235006 | 0.000240278 | 0.000245933 | 0.000251988 | 0.000258470 |
| 1.00000e-08 | 0.000235006 | 0.000240278 | 0.000245933 | 0.000251988 | 0.000258470 |
| 1.00000e-09 | 0.000235006 | 0.000240278 | 0.000245933 | 0.000251988 | 0.000258470 |

| Pa\K        | 120.000     | 130.000     | 140.000     | 150.000     | 160.000     |
|-------------|-------------|-------------|-------------|-------------|-------------|
| 1.00000e+08 | 8.97489e-13 | 1.15050e-12 | 1.46172e-12 | 1.84599e-12 | 2.32315e-12 |
| 1.00000e+07 | 1.11724e-10 | 1.40102e-10 | 1.74359e-10 | 2.15900e-10 | 2.66568e-10 |
| 1.00000e+06 | 1.07724e-09 | 9.79397e-09 | 1.17788e-08 | 1.40810e-08 | 1.67622e-08 |
| 100000.     | 1.94899e-07 | 2.24391e-07 | 2.57058e-07 | 2.93475e-07 | 3.34335e-07 |
| 10000.0     | 2.22191e-06 | 2.52551e-06 | 2.86042e-06 | 3.23229e-06 | 3.64790e-06 |
| 1000.00     | 2.12587e-05 | 2.39843e-05 | 2.69591e-05 | 3.02252e-05 | 3.38322e-05 |
| 100.000     | 0.000132005 | 0.000143151 | 0.000154617 | 0.000166499 | 0.000178893 |
| 10.0000     | 0.000245795 | 0.000254511 | 0.000263615 | 0.000273212 | 0.000283406 |
| 1.00000     | 0.000263375 | 0.000270977 | 0.000279131 | 0.000287908 | 0.000297386 |
| 0.100000    | 0.000265218 | 0.000272694 | 0.000280742 | 0.000289426 | 0.000298824 |
| 0.0100000   | 0.000265398 | 0.000272863 | 0.000280900 | 0.000289576 | 0.000298966 |
| 0.00100000  | 0.000265416 | 0.000272880 | 0.000280916 | 0.000289591 | 0.000298980 |
| 0.000100000 | 0.000265418 | 0.000272881 | 0.000280917 | 0.000289592 | 0.000298981 |
| 1.00000e-05 | 0.000265418 | 0.000272881 | 0.000280917 | 0.000289592 | 0.000298982 |
| 1.00000e-06 | 0.000265418 | 0.000272881 | 0.000280917 | 0.000289592 | 0.000298982 |
| 1.00000e-07 | 0.000265418 | 0.000272881 | 0.000280917 | 0.000289592 | 0.000298982 |
| 1.00000e-08 | 0.000265418 | 0.000272881 | 0.000280917 | 0.000289592 | 0.000298982 |
| 1.00000e-09 | 0.000265418 | 0.000272881 | 0.000280917 | 0.000289592 | 0.000298982 |

| Pa\K        | 170.000     | 180.000     | 190.000     | 200.000     | 210.000     |
|-------------|-------------|-------------|-------------|-------------|-------------|
| 1.00000e+08 | 2.91974e-12 | 3.67184e-12 | 4.62891e-12 | 5.85967e-12 | 7.46107e-12 |
| 1.00000e+07 | 3.28793e-10 | 4.05795e-10 | 5.01889e-10 | 6.22900e-10 | 7.76776e-10 |
| 1.00000e+06 | 1.98989e-08 | 2.35862e-08 | 2.79422e-08 | 3.31133e-08 | 3.92816e-08 |
| 100000.     | 3.80472e-07 | 4.32893e-07 | 4.92808e-07 | 5.61668e-07 | 6.41223e-07 |
| 10000.0     | 4.11535e-06 | 4.64432e-06 | 5.24636e-06 | 5.93527e-06 | 6.72748e-06 |
| 1000.00     | 3.78376e-05 | 4.23082e-05 | 4.73210e-05 | 5.29646e-05 | 5.93408e-05 |
| 100.000     | 0.000191901 | 0.000205634 | 0.000220201 | 0.000235720 | 0.000252317 |
| 10.0000     | 0.000294300 | 0.000306000 | 0.000318615 | 0.000332261 | 0.000347056 |
| 1.00000     | 0.000307650 | 0.000318790 | 0.000330907 | 0.000344102 | 0.000358490 |
| 0.100000    | 0.000309018 | 0.000320096 | 0.000332156 | 0.000345302 | 0.000359644 |
| 0.0100000   | 0.000309152 | 0.000320224 | 0.000332279 | 0.000345420 | 0.000359758 |
| 0.00100000  | 0.000309166 | 0.000320237 | 0.000332292 | 0.000345432 | 0.000359770 |
| 0.000100000 | 0.000309167 | 0.000320238 | 0.000332293 | 0.000345433 | 0.000359771 |
| 1.00000e-05 | 0.000309167 | 0.000320239 | 0.000332293 | 0.000345433 | 0.000359771 |
| 1.00000e-06 | 0.000309167 | 0.000320239 | 0.000332293 | 0.000345433 | 0.000359771 |
| 1.00000e-07 | 0.000309167 | 0.000320239 | 0.000332293 | 0.000345433 | 0.000359771 |
| 1.00000e-08 | 0.000309167 | 0.000320239 | 0.000332293 | 0.000345433 | 0.000359771 |
| 1.00000e-09 | 0.000309167 | 0.000320239 | 0.000332293 | 0.000345433 | 0.000359771 |

| Pa\K        | 220.000     | 230.000     | 240.000     | 250.000     | 260.000     |
|-------------|-------------|-------------|-------------|-------------|-------------|
| 1.00000e+08 | 9.57239e-12 | 1.23978e-11 | 1.62436e-11 | 2.15805e-11 | 2.91476e-11 |
| 1.00000e+07 | 9.74495e-10 | 1.23142e-09 | 1.56938e-09 | 2.01980e-09 | 2.62849e-09 |
| 1.00000e+06 | 4.66736e-08 | 5.55716e-08 | 6.63281e-08 | 7.93846e-08 | 9.52955e-08 |
| 100000.     | 7.33576e-07 | 8.41260e-07 | 9.67327e-07 | 1.11546e-06 | 1.29012e-06 |
| 10000.0     | 7.64261e-06 | 8.70406e-06 | 9.93974e-06 | 1.13829e-05 | 1.30734e-05 |
| 1000.00     | 6.65648e-05 | 7.47681e-05 | 8.40986e-05 | 9.47228e-05 | 0.000106827 |
| 100.000     | 0.000270119 | 0.000289266 | 0.000309899 | 0.000332171 | 0.000356244 |
| 10.0000     | 0.000363125 | 0.000380602 | 0.000399625 | 0.000420341 | 0.000442907 |
| 1.00000     | 0.000374189 | 0.000391326 | 0.000410035 | 0.000430462 | 0.000452759 |
| 0.100000    | 0.000375302 | 0.000392402 | 0.000411077 | 0.000431472 | 0.000453740 |
| 0.0100000   | 0.000375412 | 0.000392508 | 0.000411180 | 0.000431573 | 0.000453837 |
| 0.00100000  | 0.000375423 | 0.000392519 | 0.000411191 | 0.000431583 | 0.000453847 |
| 0.000100000 | 0.000375424 | 0.000392520 | 0.000411192 | 0.000431584 | 0.000453848 |
| 1.00000e-05 | 0.000375424 | 0.000392520 | 0.000411192 | 0.000431584 | 0.000453848 |
| 1.00000e-06 | 0.000375424 | 0.000392520 | 0.000411192 | 0.000431584 | 0.000453848 |

|             |             |             |             |             |             |
|-------------|-------------|-------------|-------------|-------------|-------------|
| 1.00000e-07 | 0.000375424 | 0.000392520 | 0.000411192 | 0.000431584 | 0.000453848 |
| 1.00000e-08 | 0.000375424 | 0.000392520 | 0.000411192 | 0.000431584 | 0.000453848 |
| 1.00000e-09 | 0.000375424 | 0.000392520 | 0.000411192 | 0.000431584 | 0.000453848 |

| Pa\K        | 270.000     | 280.000     | 290.000     | 300.000     | 310.000     |
|-------------|-------------|-------------|-------------|-------------|-------------|
| 1.00000e+08 | 4.01210e-11 | 5.63697e-11 | 8.08041e-11 | 4.03795e-09 | 1.73372e-10 |
| 1.00000e+07 | 3.46263e-09 | 4.62013e-09 | 6.24103e-09 | 7.11810e-08 | 1.16998e-08 |
| 1.00000e+06 | 1.14758e-07 | 1.38650e-07 | 1.68072e-07 | 5.11567e-07 | 2.49264e-07 |
| 100000.     | 1.49668e-06 | 1.74163e-06 | 2.03283e-06 | 4.44550e-06 | 2.79319e-06 |
| 10000.0     | 1.50585e-05 | 1.73944e-05 | 2.01483e-05 | 4.01206e-05 | 2.72350e-05 |
| 1000.00     | 0.000120616 | 0.000136318 | 0.000154182 | 0.000231090 | 0.000197464 |
| 100.000     | 0.000382286 | 0.000410478 | 0.000441008 | 0.000470135 | 0.000509815 |
| 10.0000     | 0.000467489 | 0.000494261 | 0.000523410 | 0.000532383 | 0.000589539 |
| 1.00000     | 0.000477088 | 0.000503623 | 0.000532547 | 0.000529168 | 0.000598257 |
| 0.100000    | 0.000478041 | 0.000504551 | 0.000533451 | 0.000529750 | 0.000599117 |
| 0.0100000   | 0.000478136 | 0.000504644 | 0.000533542 | 0.000529808 | 0.000599203 |
| 0.00100000  | 0.000478145 | 0.000504653 | 0.000533551 | 0.000529814 | 0.000599212 |
| 0.000100000 | 0.000478146 | 0.000504654 | 0.000533552 | 0.000529814 | 0.000599213 |
| 1.00000e-05 | 0.000478146 | 0.000504654 | 0.000533552 | 0.000529814 | 0.000599213 |
| 1.00000e-06 | 0.000478146 | 0.000504654 | 0.000533552 | 0.000529814 | 0.000599213 |
| 1.00000e-07 | 0.000478146 | 0.000504654 | 0.000533552 | 0.000529814 | 0.000599213 |
| 1.00000e-08 | 0.000478146 | 0.000504654 | 0.000533552 | 0.000529814 | 0.000599213 |
| 1.00000e-09 | 0.000478146 | 0.000504654 | 0.000533552 | 0.000529814 | 0.000599213 |

| Pa\K        | 400.000     | 500.000     | 600.000    | 700.000    | 800.000   |
|-------------|-------------|-------------|------------|------------|-----------|
| 1.00000e+08 | 2.00130e-05 | 0.00372371  | 0.0201421  | 0.0412676  | 0.0386155 |
| 1.00000e+07 | 1.05414e-05 | 0.00138643  | 0.0351564  | 0.130889   | 0.167223  |
| 1.00000e+06 | 8.06725e-06 | 0.000408715 | 0.0145824  | 0.0911467  | 0.182347  |
| 100000.     | 3.47828e-05 | 0.000529258 | 0.00762333 | 0.0413165  | 0.103138  |
| 10000.0     | 0.000224080 | 0.00127642  | 0.00559011 | 0.0173668  | 0.0430488 |
| 1000.00     | 0.000703864 | 0.00186617  | 0.00431645 | 0.00914274 | 0.0186899 |
| 100.000     | 0.000961858 | 0.00200433  | 0.00405173 | 0.00776069 | 0.0140265 |
| 10.0000     | 0.00100125  | 0.00202267  | 0.00402470 | 0.00761464 | 0.0135177 |
| 1.00000     | 0.00100541  | 0.00202456  | 0.00402202 | 0.00760012 | 0.0134678 |
| 0.100000    | 0.00100581  | 0.00202475  | 0.00402175 | 0.00759867 | 0.0134629 |
| 0.0100000   | 0.00100585  | 0.00202476  | 0.00402172 | 0.00759852 | 0.0134623 |
| 0.00100000  | 0.00100586  | 0.00202477  | 0.00402172 | 0.00759851 | 0.0134623 |
| 0.000100000 | 0.00100586  | 0.00202477  | 0.00402172 | 0.00759851 | 0.0134623 |
| 1.00000e-05 | 0.00100586  | 0.00202477  | 0.00402172 | 0.00759851 | 0.0134623 |
| 1.00000e-06 | 0.00100586  | 0.00202477  | 0.00402172 | 0.00759851 | 0.0134623 |
| 1.00000e-07 | 0.00100586  | 0.00202477  | 0.00402172 | 0.00759851 | 0.0134623 |
| 1.00000e-08 | 0.00100586  | 0.00202477  | 0.00402172 | 0.00759851 | 0.0134623 |
| 1.00000e-09 | 0.00100586  | 0.00202477  | 0.00402172 | 0.00759851 | 0.0134623 |

| Pa\K        | 900.000   | 1000.00   | 1100.00    | 1200.00    | 1300.00    |
|-------------|-----------|-----------|------------|------------|------------|
| 1.00000e+08 | 0.0206454 | 0.0125158 | 0.00992883 | 0.00902343 | 0.00866140 |
| 1.00000e+07 | 0.125679  | 0.0910439 | 0.0766707  | 0.0707895  | 0.0679980  |
| 1.00000e+06 | 0.225663  | 0.231577  | 0.224251   | 0.215317   | 0.206904   |
| 100000.     | 0.177487  | 0.225737  | 0.236981   | 0.231098   | 0.220560   |
| 10000.0     | 0.0889285 | 0.131299  | 0.144629   | 0.143705   | 0.142881   |
| 1000.00     | 0.0361455 | 0.0560570 | 0.0698621  | 0.0828203  | 0.0989452  |
| 100.000     | 0.0238205 | 0.0369364 | 0.0524746  | 0.0707953  | 0.0916603  |
| 10.0000     | 0.0224395 | 0.0347916 | 0.0505993  | 0.0695763  | 0.0909704  |
| 1.00000     | 0.0223084 | 0.0345940 | 0.0504285  | 0.0694669  | 0.0909095  |
| 0.100000    | 0.0222955 | 0.0345753 | 0.0504127  | 0.0694568  | 0.0909044  |
| 0.0100000   | 0.0222943 | 0.0345735 | 0.0504111  | 0.0694558  | 0.0909037  |
| 0.00100000  | 0.0222941 | 0.0345733 | 0.0504110  | 0.0694557  | 0.0909037  |
| 0.000100000 | 0.0222941 | 0.0345733 | 0.0504110  | 0.0694557  | 0.0909037  |
| 1.00000e-05 | 0.0222941 | 0.0345733 | 0.0504110  | 0.0694557  | 0.0909037  |
| 1.00000e-06 | 0.0222941 | 0.0345733 | 0.0504110  | 0.0694557  | 0.0909037  |
| 1.00000e-07 | 0.0222941 | 0.0345733 | 0.0504110  | 0.0694557  | 0.0909037  |
| 1.00000e-08 | 0.0222941 | 0.0345733 | 0.0504110  | 0.0694557  | 0.0909037  |
| 1.00000e-09 | 0.0222941 | 0.0345733 | 0.0504110  | 0.0694557  | 0.0909037  |

| Pa\K        | 1400.00    | 1500.00    | 1750.00  | 2000.00  | 2250.00  |
|-------------|------------|------------|----------|----------|----------|
| 1.00000e+08 | 0.00848896 | 0.00839266 | 0.178301 | 0.175802 | 0.169953 |
| 1.00000e+07 | 0.0662947  | 0.0649902  | 0.340984 | 0.313391 | 0.278523 |
| 1.00000e+06 | 0.199226   | 0.192432   | 0.378742 | 0.324171 | 0.276384 |
| 100000.     | 0.210813   | 0.204091   | 0.290777 | 0.260828 | 0.239954 |
| 10000.0     | 0.147035   | 0.156057   | 0.213041 | 0.227126 | 0.227228 |
| 1000.00     | 0.118046   | 0.138395   | 0.194568 | 0.221426 | 0.225558 |
| 100.000     | 0.113983   | 0.136298   | 0.192425 | 0.220844 | 0.225403 |
| 10.0000     | 0.113627   | 0.136131   | 0.192216 | 0.220790 | 0.225390 |
| 1.00000     | 0.113596   | 0.136118   | 0.192197 | 0.220785 | 0.225388 |
| 0.100000    | 0.113594   | 0.136116   | 0.192195 | 0.220784 | 0.225388 |
| 0.0100000   | 0.113593   | 0.136116   | 0.192195 | 0.220784 | 0.225388 |

|             |          |          |          |          |          |
|-------------|----------|----------|----------|----------|----------|
| 0.00100000  | 0.113593 | 0.136116 | 0.192195 | 0.220784 | 0.225388 |
| 0.00010000  | 0.113593 | 0.136116 | 0.192195 | 0.220784 | 0.225388 |
| 1.00000e-05 | 0.113593 | 0.136116 | 0.192195 | 0.220784 | 0.225388 |
| 1.00000e-06 | 0.113593 | 0.136116 | 0.192195 | 0.220784 | 0.225388 |
| 1.00000e-07 | 0.113593 | 0.136116 | 0.192195 | 0.220784 | 0.225388 |
| 1.00000e-08 | 0.113593 | 0.136116 | 0.192195 | 0.220784 | 0.225388 |
| 1.00000e-09 | 0.113593 | 0.136116 | 0.192195 | 0.220784 | 0.225388 |

PhcycC3H3\_B+H

=====

| Pa\K        | 20.0000     | 30.0000     | 40.0000     | 50.0000     | 60.0000     |
|-------------|-------------|-------------|-------------|-------------|-------------|
| 1.00000e+08 | 3.32165e-23 | 9.47490e-23 | 2.73947e-22 | 8.44807e-22 | 2.71193e-21 |
| 1.00000e+07 | 3.12046e-22 | 8.57567e-22 | 2.34847e-21 | 6.94204e-21 | 2.19405e-20 |
| 1.00000e+06 | 2.84807e-21 | 7.22748e-21 | 1.83728e-20 | 5.11918e-20 | 1.55403e-19 |
| 100000.     | 1.41886e-20 | 2.11715e-20 | 3.72873e-20 | 8.21930e-20 | 2.25552e-19 |
| 10000.0     | 4.76218e-21 | 2.94881e-21 | 4.08431e-21 | 9.53271e-21 | 4.22135e-20 |
| 1000.00     | 2.62862e-22 | 2.05993e-22 | 3.54004e-22 | 1.21255e-21 | 1.74732e-20 |
| 100.000     | 9.42898e-23 | 1.84670e-22 | 3.98948e-22 | 1.24453e-21 | 1.70315e-20 |
| 10.0000     | 2.70753e-22 | 3.15174e-22 | 4.52948e-22 | 1.13715e-21 | 1.66257e-20 |
| 1.00000     | 5.03529e-23 | 2.89756e-23 | 3.78841e-23 | 3.75164e-22 | 1.49179e-20 |
| 0.100000    | 2.83036e-24 | 1.99116e-24 | 3.77343e-24 | 3.05129e-22 | 1.47227e-20 |
| 0.0100000   | 2.51879e-25 | 1.88459e-25 | 1.11671e-24 | 2.98958e-22 | 1.47038e-20 |
| 0.00100000  | 2.48703e-26 | 1.87751e-26 | 8.59744e-25 | 2.98351e-22 | 1.47019e-20 |
| 0.000100000 | 2.48384e-27 | 1.91387e-27 | 8.34135e-25 | 2.98290e-22 | 1.47018e-20 |
| 1.00000e-05 | 2.48353e-28 | 2.28819e-28 | 8.31575e-25 | 2.98284e-22 | 1.47017e-20 |
| 1.00000e-06 | 2.48349e-29 | 6.03248e-29 | 8.31319e-25 | 2.98283e-22 | 1.47017e-20 |
| 1.00000e-07 | 2.48349e-30 | 4.34755e-29 | 8.31294e-25 | 2.98283e-22 | 1.47017e-20 |
| 1.00000e-08 | 2.48349e-31 | 4.17906e-29 | 8.31291e-25 | 2.98283e-22 | 1.47017e-20 |
| 1.00000e-09 | 2.48349e-32 | 4.16221e-29 | 8.31291e-25 | 2.98283e-22 | 1.47017e-20 |

| Pa\K        | 70.0000     | 80.0000     | 90.0000     | 100.000     | 110.000     |
|-------------|-------------|-------------|-------------|-------------|-------------|
| 1.00000e+08 | 8.96088e-21 | 2.99513e-20 | 9.79135e-20 | 3.03313e-19 | 8.77092e-19 |
| 1.00000e+07 | 7.32650e-20 | 2.51325e-19 | 8.45192e-19 | 2.68021e-18 | 7.88422e-18 |
| 1.00000e+06 | 5.09050e-19 | 1.74189e-18 | 5.87142e-18 | 1.85734e-17 | 5.40562e-17 |
| 100000.     | 7.77422e-19 | 3.06467e-18 | 1.17265e-17 | 3.99108e-17 | 1.19277e-16 |
| 10000.0     | 3.17645e-19 | 2.12907e-18 | 1.05684e-17 | 4.05259e-17 | 1.27772e-16 |
| 1000.00     | 2.44078e-19 | 1.95457e-18 | 1.02814e-17 | 4.03211e-17 | 1.28348e-16 |
| 100.000     | 2.42388e-19 | 1.95629e-18 | 1.03222e-17 | 4.05378e-17 | 1.29136e-16 |
| 10.0000     | 2.42746e-19 | 1.96821e-18 | 1.03978e-17 | 4.08526e-17 | 1.30160e-16 |
| 1.00000     | 2.38925e-19 | 1.96248e-18 | 1.04006e-17 | 4.09067e-17 | 1.30381e-16 |
| 0.100000    | 2.38394e-19 | 1.96149e-18 | 1.04002e-17 | 4.09117e-17 | 1.30405e-16 |
| 0.0100000   | 2.38340e-19 | 1.96139e-18 | 1.04002e-17 | 4.09122e-17 | 1.30407e-16 |
| 0.00100000  | 2.38335e-19 | 1.96138e-18 | 1.04002e-17 | 4.09123e-17 | 1.30407e-16 |
| 0.000100000 | 2.38334e-19 | 1.96138e-18 | 1.04002e-17 | 4.09123e-17 | 1.30407e-16 |
| 1.00000e-05 | 2.38334e-19 | 1.96138e-18 | 1.04002e-17 | 4.09123e-17 | 1.30407e-16 |
| 1.00000e-06 | 2.38334e-19 | 1.96138e-18 | 1.04002e-17 | 4.09123e-17 | 1.30407e-16 |
| 1.00000e-07 | 2.38334e-19 | 1.96138e-18 | 1.04002e-17 | 4.09123e-17 | 1.30407e-16 |
| 1.00000e-08 | 2.38334e-19 | 1.96138e-18 | 1.04002e-17 | 4.09123e-17 | 1.30407e-16 |
| 1.00000e-09 | 2.38334e-19 | 1.96138e-18 | 1.04002e-17 | 4.09123e-17 | 1.30407e-16 |

| Pa\K        | 120.000     | 130.000     | 140.000     | 150.000     | 160.000     |
|-------------|-------------|-------------|-------------|-------------|-------------|
| 1.00000e+08 | 2.36657e-18 | 6.00033e-18 | 1.44318e-17 | 3.32395e-17 | 7.39409e-17 |
| 1.00000e+07 | 2.15254e-17 | 5.49953e-17 | 1.32855e-16 | 3.06504e-16 | 6.81242e-16 |
| 1.00000e+06 | 1.44785e-16 | 3.60049e-16 | 8.40358e-16 | 1.85970e-15 | 3.93600e-15 |
| 100000.     | 3.17736e-16 | 7.69765e-16 | 1.72713e-15 | 3.64246e-15 | 7.30495e-15 |
| 10000.0     | 3.47939e-16 | 8.48155e-16 | 1.89911e-15 | 3.97977e-15 | 7.91344e-15 |
| 1000.00     | 3.50941e-16 | 8.56797e-16 | 1.91902e-15 | 4.02012e-15 | 7.98856e-15 |
| 100.000     | 3.53272e-16 | 8.62831e-16 | 1.93323e-15 | 4.05133e-15 | 8.05352e-15 |
| 10.0000     | 3.56090e-16 | 8.69675e-16 | 1.94836e-15 | 4.08244e-15 | 8.11381e-15 |
| 1.00000     | 3.56730e-16 | 8.71223e-16 | 1.95169e-15 | 4.08899e-15 | 8.12592e-15 |
| 0.100000    | 3.56801e-16 | 8.71396e-16 | 1.95206e-15 | 4.08972e-15 | 8.12725e-15 |
| 0.0100000   | 3.56808e-16 | 8.71414e-16 | 1.95210e-15 | 4.08979e-15 | 8.12739e-15 |
| 0.00100000  | 3.56809e-16 | 8.71415e-16 | 1.95210e-15 | 4.08980e-15 | 8.12740e-15 |
| 0.000100000 | 3.56809e-16 | 8.71416e-16 | 1.95210e-15 | 4.08980e-15 | 8.12740e-15 |
| 1.00000e-05 | 3.56809e-16 | 8.71416e-16 | 1.95210e-15 | 4.08980e-15 | 8.12740e-15 |
| 1.00000e-06 | 3.56809e-16 | 8.71416e-16 | 1.95210e-15 | 4.08980e-15 | 8.12740e-15 |
| 1.00000e-07 | 3.56809e-16 | 8.71416e-16 | 1.95210e-15 | 4.08980e-15 | 8.12740e-15 |
| 1.00000e-08 | 3.56809e-16 | 8.71416e-16 | 1.95210e-15 | 4.08980e-15 | 8.12740e-15 |
| 1.00000e-09 | 3.56809e-16 | 8.71416e-16 | 1.95210e-15 | 4.08980e-15 | 8.12740e-15 |

| Pa\K        | 170.000     | 180.000     | 190.000     | 200.000     | 210.000     |
|-------------|-------------|-------------|-------------|-------------|-------------|
| 1.00000e+08 | 1.60048e-16 | 3.39298e-16 | 7.08630e-16 | 1.46596e-15 | 3.01972e-15 |
| 1.00000e+07 | 1.46962e-15 | 3.09651e-15 | 6.40685e-15 | 1.30785e-14 | 2.64508e-14 |
| 1.00000e+06 | 8.02360e-15 | 1.58434e-14 | 3.04405e-14 | 5.71148e-14 | 1.04953e-13 |
| 100000.     | 1.40575e-14 | 2.61391e-14 | 4.72176e-14 | 8.32075e-14 | 1.43508e-13 |

|             |             |             |             |             |             |
|-------------|-------------|-------------|-------------|-------------|-------------|
| 10000.0     | 1.50835e-14 | 2.77704e-14 | 4.96720e-14 | 8.66947e-14 | 1.48143e-13 |
| 1000.00     | 1.52150e-14 | 2.79905e-14 | 5.00277e-14 | 8.72545e-14 | 1.49007e-13 |
| 100.000     | 1.53445e-14 | 2.82395e-14 | 5.04923e-14 | 8.80984e-14 | 1.50503e-13 |
| 10.0000     | 1.54559e-14 | 2.84373e-14 | 5.08317e-14 | 8.86642e-14 | 1.51423e-13 |
| 1.00000     | 1.54772e-14 | 2.84733e-14 | 5.08905e-14 | 8.87579e-14 | 1.51569e-13 |
| 0.100000    | 1.54795e-14 | 2.84772e-14 | 5.08969e-14 | 8.87679e-14 | 1.51584e-13 |
| 0.0100000   | 1.54797e-14 | 2.84776e-14 | 5.08975e-14 | 8.87689e-14 | 1.51586e-13 |
| 0.00100000  | 1.54798e-14 | 2.84776e-14 | 5.08976e-14 | 8.87690e-14 | 1.51586e-13 |
| 0.000100000 | 1.54798e-14 | 2.84776e-14 | 5.08976e-14 | 8.87690e-14 | 1.51586e-13 |
| 1.00000e-05 | 1.54798e-14 | 2.84776e-14 | 5.08976e-14 | 8.87690e-14 | 1.51586e-13 |
| 1.00000e-06 | 1.54798e-14 | 2.84776e-14 | 5.08976e-14 | 8.87690e-14 | 1.51586e-13 |
| 1.00000e-07 | 1.54798e-14 | 2.84776e-14 | 5.08976e-14 | 8.87690e-14 | 1.51586e-13 |
| 1.00000e-08 | 1.54798e-14 | 2.84776e-14 | 5.08976e-14 | 8.87690e-14 | 1.51586e-13 |
| 1.00000e-09 | 1.54798e-14 | 2.84776e-14 | 5.08976e-14 | 8.87690e-14 | 1.51586e-13 |

| Pa\K        | 220.000     | 230.000     | 240.000     | 250.000     | 260.000     |
|-------------|-------------|-------------|-------------|-------------|-------------|
| 1.00000e+08 | 6.22561e-15 | 1.29070e-14 | 2.70028e-14 | 5.70533e-14 | 1.21335e-13 |
| 1.00000e+07 | 5.32033e-14 | 1.06774e-13 | 2.14291e-13 | 4.30291e-13 | 8.62644e-13 |
| 1.00000e+06 | 1.89323e-13 | 3.35900e-13 | 5.87063e-13 | 1.01193e-12 | 1.72173e-12 |
| 100000.     | 2.42861e-13 | 4.04082e-13 | 6.62056e-13 | 1.06946e-12 | 1.70479e-12 |
| 10000.0     | 2.48482e-13 | 4.09922e-13 | 6.66144e-13 | 1.06758e-12 | 1.68879e-12 |
| 1000.00     | 2.49797e-13 | 4.11904e-13 | 6.69117e-13 | 1.07203e-12 | 1.69545e-12 |
| 100.000     | 2.52391e-13 | 4.16313e-13 | 6.76463e-13 | 1.08405e-12 | 1.71475e-12 |
| 10.0000     | 2.53852e-13 | 4.18587e-13 | 6.79935e-13 | 1.08926e-12 | 1.72243e-12 |
| 1.00000     | 2.54075e-13 | 4.18920e-13 | 6.80425e-13 | 1.08997e-12 | 1.72346e-12 |
| 0.100000    | 2.54098e-13 | 4.18954e-13 | 6.80477e-13 | 1.09004e-12 | 1.72356e-12 |
| 0.0100000   | 2.54100e-13 | 4.18958e-13 | 6.80482e-13 | 1.09005e-12 | 1.72357e-12 |
| 0.00100000  | 2.54101e-13 | 4.18958e-13 | 6.80482e-13 | 1.09005e-12 | 1.72357e-12 |
| 0.000100000 | 2.54101e-13 | 4.18958e-13 | 6.80482e-13 | 1.09005e-12 | 1.72357e-12 |
| 1.00000e-05 | 2.54101e-13 | 4.18958e-13 | 6.80482e-13 | 1.09005e-12 | 1.72357e-12 |
| 1.00000e-06 | 2.54101e-13 | 4.18958e-13 | 6.80482e-13 | 1.09005e-12 | 1.72357e-12 |
| 1.00000e-07 | 2.54101e-13 | 4.18958e-13 | 6.80482e-13 | 1.09005e-12 | 1.72357e-12 |
| 1.00000e-08 | 2.54101e-13 | 4.18958e-13 | 6.80482e-13 | 1.09005e-12 | 1.72357e-12 |
| 1.00000e-09 | 2.54101e-13 | 4.18958e-13 | 6.80482e-13 | 1.09005e-12 | 1.72357e-12 |

| Pa\K        | 270.000     | 280.000     | 290.000     | 300.000     | 310.000     |
|-------------|-------------|-------------|-------------|-------------|-------------|
| 1.00000e+08 | 2.57689e-13 | 5.40359e-13 | 1.10500e-12 | 2.01524e-09 | 4.10697e-12 |
| 1.00000e+07 | 1.71788e-12 | 3.37230e-12 | 6.46767e-12 | 1.15392e-09 | 2.14561e-11 |
| 1.00000e+06 | 2.89257e-12 | 4.79749e-12 | 7.84870e-12 | 7.65174e-11 | 2.00320e-11 |
| 100000.     | 2.68337e-12 | 4.17187e-12 | 6.40664e-12 | 1.43931e-11 | 1.45400e-11 |
| 10000.0     | 2.63830e-12 | 4.07161e-12 | 6.20719e-12 | 1.09019e-11 | 1.38864e-11 |
| 1000.00     | 2.64826e-12 | 4.08649e-12 | 6.22932e-12 | 1.07164e-11 | 1.39341e-11 |
| 100.000     | 2.67871e-12 | 4.13370e-12 | 6.30125e-12 | 1.06155e-11 | 1.40924e-11 |
| 10.0000     | 2.68990e-12 | 4.14973e-12 | 6.32391e-12 | 1.05924e-11 | 1.41358e-11 |
| 1.00000     | 2.69134e-12 | 4.15176e-12 | 6.32669e-12 | 1.05898e-11 | 1.41409e-11 |
| 0.100000    | 2.69149e-12 | 4.15196e-12 | 6.32698e-12 | 1.05897e-11 | 1.41414e-11 |
| 0.0100000   | 2.69150e-12 | 4.15198e-12 | 6.32701e-12 | 1.05896e-11 | 1.41415e-11 |
| 0.00100000  | 2.69151e-12 | 4.15199e-12 | 6.32701e-12 | 1.05896e-11 | 1.41415e-11 |
| 0.000100000 | 2.69151e-12 | 4.15199e-12 | 6.32701e-12 | 1.05896e-11 | 1.41415e-11 |
| 1.00000e-05 | 2.69151e-12 | 4.15199e-12 | 6.32701e-12 | 1.05896e-11 | 1.41415e-11 |
| 1.00000e-06 | 2.69151e-12 | 4.15199e-12 | 6.32701e-12 | 1.05896e-11 | 1.41415e-11 |
| 1.00000e-07 | 2.69151e-12 | 4.15199e-12 | 6.32701e-12 | 1.05896e-11 | 1.41415e-11 |
| 1.00000e-08 | 2.69151e-12 | 4.15199e-12 | 6.32701e-12 | 1.05896e-11 | 1.41415e-11 |
| 1.00000e-09 | 2.69151e-12 | 4.15199e-12 | 6.32701e-12 | 1.05896e-11 | 1.41415e-11 |

| Pa\K        | 400.000     | 500.000     | 600.000     | 700.000     | 800.000     |
|-------------|-------------|-------------|-------------|-------------|-------------|
| 1.00000e+08 | 1.85739e-05 | 0.00232827  | 0.00817748  | 0.0103561   | 0.0112749   |
| 1.00000e+07 | 6.72051e-07 | 9.58549e-05 | 0.00217256  | 0.00631685  | 0.00824397  |
| 1.00000e+06 | 1.15354e-08 | 2.04570e-06 | 0.000195667 | 0.00152308  | 0.00272000  |
| 100000.     | 9.54141e-10 | 1.34313e-07 | 1.74542e-05 | 0.000176896 | 0.000398605 |
| 10000.0     | 4.76125e-10 | 2.07094e-08 | 1.75974e-06 | 1.72431e-05 | 4.41169e-05 |
| 1000.00     | 4.24753e-10 | 9.11599e-09 | 2.49300e-07 | 2.19104e-06 | 7.03671e-06 |
| 100.000     | 4.16222e-10 | 7.94083e-09 | 1.00810e-07 | 7.54744e-07 | 3.45130e-06 |
| 10.0000     | 4.15259e-10 | 7.82403e-09 | 8.60298e-08 | 6.13493e-07 | 3.09995e-06 |
| 1.00000     | 4.15161e-10 | 7.81236e-09 | 8.45535e-08 | 5.99448e-07 | 3.06510e-06 |
| 0.100000    | 4.15152e-10 | 7.81120e-09 | 8.44059e-08 | 5.98044e-07 | 3.06163e-06 |
| 0.0100000   | 4.15151e-10 | 7.81108e-09 | 8.43911e-08 | 5.97905e-07 | 3.06128e-06 |
| 0.00100000  | 4.15151e-10 | 7.81107e-09 | 8.43896e-08 | 5.97891e-07 | 3.06124e-06 |
| 0.000100000 | 4.15151e-10 | 7.81107e-09 | 8.43895e-08 | 5.97889e-07 | 3.06124e-06 |
| 1.00000e-05 | 4.15151e-10 | 7.81107e-09 | 8.43895e-08 | 5.97889e-07 | 3.06124e-06 |
| 1.00000e-06 | 4.15151e-10 | 7.81107e-09 | 8.43895e-08 | 5.97889e-07 | 3.06124e-06 |
| 1.00000e-07 | 4.15151e-10 | 7.81107e-09 | 8.43895e-08 | 5.97889e-07 | 3.06124e-06 |
| 1.00000e-08 | 4.15151e-10 | 7.81107e-09 | 8.43895e-08 | 5.97889e-07 | 3.06124e-06 |
| 1.00000e-09 | 4.15151e-10 | 7.81107e-09 | 8.43895e-08 | 5.97889e-07 | 3.06124e-06 |

| Pa\K | 900.000 | 1000.00 | 1100.00 | 1200.00 | 1300.00 |
|------|---------|---------|---------|---------|---------|
|------|---------|---------|---------|---------|---------|

|             |             |             |             |             |             |
|-------------|-------------|-------------|-------------|-------------|-------------|
| 1.00000e+08 | 0.0114370   | 0.0111448   | 0.0106533   | 0.0100946   | 0.00953574  |
| 1.00000e+07 | 0.00826826  | 0.00764993  | 0.00689775  | 0.00618211  | 0.00559724  |
| 1.00000e+06 | 0.00291305  | 0.00266928  | 0.00237518  | 0.00218595  | 0.00217698  |
| 100000.     | 0.000674341 | 0.000915622 | 0.00103364  | 0.00113127  | 0.00132696  |
| 10000.0     | 0.000142142 | 0.000320753 | 0.000445754 | 0.000564700 | 0.000799880 |
| 1000.00     | 3.14221e-05 | 9.27982e-05 | 0.000171287 | 0.000311589 | 0.000596158 |
| 100.000     | 1.42011e-05 | 4.52463e-05 | 0.000115237 | 0.000266416 | 0.000564923 |
| 10.0000     | 1.23555e-05 | 3.99793e-05 | 0.000109198 | 0.000261781 | 0.000561865 |
| 1.00000     | 1.21758e-05 | 3.94823e-05 | 0.000108634 | 0.000261350 | 0.000561583 |
| 0.100000    | 1.21581e-05 | 3.94345e-05 | 0.000108581 | 0.000261310 | 0.000561556 |
| 0.0100000   | 1.21563e-05 | 3.94298e-05 | 0.000108575 | 0.000261306 | 0.000561554 |
| 0.00100000  | 1.21561e-05 | 3.94294e-05 | 0.000108575 | 0.000261306 | 0.000561554 |
| 0.000100000 | 1.21561e-05 | 3.94293e-05 | 0.000108575 | 0.000261306 | 0.000561554 |
| 1.00000e-05 | 1.21561e-05 | 3.94293e-05 | 0.000108575 | 0.000261306 | 0.000561554 |
| 1.00000e-06 | 1.21561e-05 | 3.94293e-05 | 0.000108575 | 0.000261306 | 0.000561554 |
| 1.00000e-07 | 1.21561e-05 | 3.94293e-05 | 0.000108575 | 0.000261306 | 0.000561554 |
| 1.00000e-08 | 1.21561e-05 | 3.94293e-05 | 0.000108575 | 0.000261306 | 0.000561554 |
| 1.00000e-09 | 1.21561e-05 | 3.94293e-05 | 0.000108575 | 0.000261306 | 0.000561554 |

| Pa\K        | 1400.00    | 1500.00    | 1750.00    | 2000.00   | 2250.00   |
|-------------|------------|------------|------------|-----------|-----------|
| 1.00000e+08 | 0.00901842 | 0.00857622 | 0.247516   | 0.208023  | 0.177313  |
| 1.00000e+07 | 0.00522120 | 0.00512429 | 0.0950492  | 0.0759413 | 0.0697887 |
| 1.00000e+06 | 0.00241949 | 0.00298165 | 0.0233463  | 0.0268580 | 0.0373234 |
| 100000.     | 0.00173136 | 0.00244046 | 0.0105796  | 0.0184813 | 0.0321561 |
| 10000.0     | 0.00126564 | 0.00205369 | 0.00754092 | 0.0168393 | 0.0313355 |
| 1000.00     | 0.00111472 | 0.00194864 | 0.00700288 | 0.0166159 | 0.0312410 |
| 100.000     | 0.00109456 | 0.00193617 | 0.00694273 | 0.0165930 | 0.0312317 |
| 10.0000     | 0.00109266 | 0.00193503 | 0.00693684 | 0.0165908 | 0.0312308 |
| 1.00000     | 0.00109249 | 0.00193493 | 0.00693624 | 0.0165905 | 0.0312307 |
| 0.100000    | 0.00109247 | 0.00193492 | 0.00693618 | 0.0165905 | 0.0312307 |
| 0.0100000   | 0.00109247 | 0.00193492 | 0.00693618 | 0.0165905 | 0.0312307 |
| 0.00100000  | 0.00109247 | 0.00193492 | 0.00693618 | 0.0165905 | 0.0312307 |
| 0.000100000 | 0.00109247 | 0.00193492 | 0.00693618 | 0.0165905 | 0.0312307 |
| 1.00000e-05 | 0.00109247 | 0.00193492 | 0.00693618 | 0.0165905 | 0.0312307 |
| 1.00000e-06 | 0.00109247 | 0.00193492 | 0.00693618 | 0.0165905 | 0.0312307 |
| 1.00000e-07 | 0.00109247 | 0.00193492 | 0.00693618 | 0.0165905 | 0.0312307 |
| 1.00000e-08 | 0.00109247 | 0.00193492 | 0.00693618 | 0.0165905 | 0.0312307 |
| 1.00000e-09 | 0.00109247 | 0.00193492 | 0.00693618 | 0.0165905 | 0.0312307 |

Benzene+cycloprop-1-enylidene

| Pa\K        | 20.0000     | 30.0000     | 40.0000     | 50.0000     | 60.0000     |
|-------------|-------------|-------------|-------------|-------------|-------------|
| 1.00000e+08 | 5.02895e-84 | 9.28861e-56 | 1.10663e-41 | 2.85507e-33 | 1.09842e-27 |
| 1.00000e+07 | 5.02895e-84 | 9.28861e-56 | 1.10663e-41 | 2.85507e-33 | 1.09842e-27 |
| 1.00000e+06 | 5.02895e-84 | 9.28861e-56 | 1.10663e-41 | 2.85507e-33 | 1.09842e-27 |
| 100000.     | 5.02895e-84 | 9.28861e-56 | 1.10663e-41 | 2.85507e-33 | 1.09842e-27 |
| 10000.0     | 5.02895e-84 | 9.28861e-56 | 1.10663e-41 | 2.85507e-33 | 1.09842e-27 |
| 1000.00     | 5.02895e-84 | 9.28861e-56 | 1.10663e-41 | 2.85507e-33 | 1.09842e-27 |
| 100.000     | 5.02895e-84 | 9.28861e-56 | 1.10663e-41 | 2.85507e-33 | 1.09842e-27 |
| 10.0000     | 5.02895e-84 | 9.28861e-56 | 1.10663e-41 | 2.85507e-33 | 1.09842e-27 |
| 1.00000     | 5.02895e-84 | 9.28861e-56 | 1.10663e-41 | 2.85507e-33 | 1.09842e-27 |
| 0.100000    | 5.02895e-84 | 9.28861e-56 | 1.10663e-41 | 2.85507e-33 | 1.09842e-27 |
| 0.0100000   | 5.02895e-84 | 9.28861e-56 | 1.10663e-41 | 2.85507e-33 | 1.09842e-27 |
| 0.00100000  | 5.02895e-84 | 9.28861e-56 | 1.10663e-41 | 2.85507e-33 | 1.09842e-27 |
| 0.000100000 | 5.02895e-84 | 9.28861e-56 | 1.10663e-41 | 2.85507e-33 | 1.09842e-27 |
| 1.00000e-05 | 5.02895e-84 | 9.28861e-56 | 1.10663e-41 | 2.85507e-33 | 1.09842e-27 |
| 1.00000e-06 | 5.02895e-84 | 9.28861e-56 | 1.10663e-41 | 2.85507e-33 | 1.09842e-27 |
| 1.00000e-07 | 5.02895e-84 | 9.28861e-56 | 1.10663e-41 | 2.85507e-33 | 1.09842e-27 |
| 1.00000e-08 | 5.02895e-84 | 9.28861e-56 | 1.10663e-41 | 2.85507e-33 | 1.09842e-27 |
| 1.00000e-09 | 5.02895e-84 | 9.28861e-56 | 1.10663e-41 | 2.85507e-33 | 1.09842e-27 |

| Pa\K        | 70.0000     | 80.0000     | 90.0000     | 100.000     | 110.000     |
|-------------|-------------|-------------|-------------|-------------|-------------|
| 1.00000e+08 | 1.03290e-23 | 9.59328e-21 | 1.90970e-18 | 1.29619e-16 | 4.02908e-15 |
| 1.00000e+07 | 1.03290e-23 | 9.59328e-21 | 1.90970e-18 | 1.29619e-16 | 4.02908e-15 |
| 1.00000e+06 | 1.03290e-23 | 9.59328e-21 | 1.90970e-18 | 1.29619e-16 | 4.02908e-15 |
| 100000.     | 1.03290e-23 | 9.59328e-21 | 1.90970e-18 | 1.29619e-16 | 4.02908e-15 |
| 10000.0     | 1.03290e-23 | 9.59328e-21 | 1.90970e-18 | 1.29619e-16 | 4.02908e-15 |
| 1000.00     | 1.03290e-23 | 9.59328e-21 | 1.90970e-18 | 1.29619e-16 | 4.02908e-15 |
| 100.000     | 1.03290e-23 | 9.59328e-21 | 1.90970e-18 | 1.29619e-16 | 4.02908e-15 |
| 10.0000     | 1.03290e-23 | 9.59328e-21 | 1.90970e-18 | 1.29619e-16 | 4.02908e-15 |
| 1.00000     | 1.03290e-23 | 9.59328e-21 | 1.90970e-18 | 1.29619e-16 | 4.02908e-15 |
| 0.100000    | 1.03290e-23 | 9.59328e-21 | 1.90970e-18 | 1.29619e-16 | 4.02908e-15 |
| 0.0100000   | 1.03290e-23 | 9.59328e-21 | 1.90970e-18 | 1.29619e-16 | 4.02908e-15 |
| 0.00100000  | 1.03290e-23 | 9.59328e-21 | 1.90970e-18 | 1.29619e-16 | 4.02908e-15 |
| 0.000100000 | 1.03290e-23 | 9.59328e-21 | 1.90970e-18 | 1.29619e-16 | 4.02908e-15 |
| 1.00000e-05 | 1.03290e-23 | 9.59328e-21 | 1.90970e-18 | 1.29619e-16 | 4.02908e-15 |



|             |             |             |             |             |             |
|-------------|-------------|-------------|-------------|-------------|-------------|
| 0.0100000   | 1.67993e-06 | 2.67442e-06 | 4.11523e-06 | 6.45054e-06 | 9.49359e-06 |
| 0.00100000  | 1.67993e-06 | 2.67442e-06 | 4.11523e-06 | 6.45054e-06 | 9.49359e-06 |
| 0.000100000 | 1.67993e-06 | 2.67442e-06 | 4.11523e-06 | 6.45054e-06 | 9.49359e-06 |
| 1.00000e-05 | 1.67993e-06 | 2.67442e-06 | 4.11523e-06 | 6.45054e-06 | 9.49359e-06 |
| 1.00000e-06 | 1.67993e-06 | 2.67442e-06 | 4.11523e-06 | 6.45054e-06 | 9.49359e-06 |
| 1.00000e-07 | 1.67993e-06 | 2.67442e-06 | 4.11523e-06 | 6.45054e-06 | 9.49359e-06 |
| 1.00000e-08 | 1.67993e-06 | 2.67442e-06 | 4.11523e-06 | 6.45054e-06 | 9.49359e-06 |
| 1.00000e-09 | 1.67993e-06 | 2.67442e-06 | 4.11523e-06 | 6.45054e-06 | 9.49359e-06 |

| Pa\K        | 400.000     | 500.000     | 600.000    | 700.000    | 800.000   |
|-------------|-------------|-------------|------------|------------|-----------|
| 1.00000e+08 | 0.000130914 | 0.000812306 | 0.00276289 | 0.00662918 | 0.0127462 |
| 1.00000e+07 | 0.000130914 | 0.000812306 | 0.00276289 | 0.00662926 | 0.0127469 |
| 1.00000e+06 | 0.000130914 | 0.000812306 | 0.00276289 | 0.00662927 | 0.0127470 |
| 100000.     | 0.000130914 | 0.000812306 | 0.00276289 | 0.00662927 | 0.0127470 |
| 10000.0     | 0.000130914 | 0.000812306 | 0.00276289 | 0.00662927 | 0.0127470 |
| 1000.00     | 0.000130914 | 0.000812306 | 0.00276289 | 0.00662927 | 0.0127470 |
| 100.000     | 0.000130914 | 0.000812306 | 0.00276289 | 0.00662927 | 0.0127470 |
| 10.0000     | 0.000130914 | 0.000812306 | 0.00276289 | 0.00662927 | 0.0127470 |
| 1.00000     | 0.000130914 | 0.000812306 | 0.00276289 | 0.00662927 | 0.0127470 |
| 0.100000    | 0.000130914 | 0.000812306 | 0.00276289 | 0.00662927 | 0.0127470 |
| 0.0100000   | 0.000130914 | 0.000812306 | 0.00276289 | 0.00662927 | 0.0127470 |
| 0.00100000  | 0.000130914 | 0.000812306 | 0.00276289 | 0.00662927 | 0.0127470 |
| 0.000100000 | 0.000130914 | 0.000812306 | 0.00276289 | 0.00662927 | 0.0127470 |
| 1.00000e-05 | 0.000130914 | 0.000812306 | 0.00276289 | 0.00662927 | 0.0127470 |
| 1.00000e-06 | 0.000130914 | 0.000812306 | 0.00276289 | 0.00662927 | 0.0127470 |
| 1.00000e-07 | 0.000130914 | 0.000812306 | 0.00276289 | 0.00662927 | 0.0127470 |
| 1.00000e-08 | 0.000130914 | 0.000812306 | 0.00276289 | 0.00662927 | 0.0127470 |
| 1.00000e-09 | 0.000130914 | 0.000812306 | 0.00276289 | 0.00662927 | 0.0127470 |

| Pa\K        | 900.000   | 1000.00   | 1100.00   | 1200.00   | 1300.00   |
|-------------|-----------|-----------|-----------|-----------|-----------|
| 1.00000e+08 | 0.0211033 | 0.0314341 | 0.0433363 | 0.0563700 | 0.0701208 |
| 1.00000e+07 | 0.0211052 | 0.0314376 | 0.0433418 | 0.0563775 | 0.0701301 |
| 1.00000e+06 | 0.0211054 | 0.0314380 | 0.0433424 | 0.0563784 | 0.0701312 |
| 100000.     | 0.0211054 | 0.0314381 | 0.0433425 | 0.0563785 | 0.0701313 |
| 10000.0     | 0.0211054 | 0.0314381 | 0.0433425 | 0.0563786 | 0.0701313 |
| 1000.00     | 0.0211054 | 0.0314381 | 0.0433425 | 0.0563786 | 0.0701313 |
| 100.000     | 0.0211054 | 0.0314381 | 0.0433425 | 0.0563786 | 0.0701313 |
| 10.0000     | 0.0211054 | 0.0314381 | 0.0433425 | 0.0563786 | 0.0701313 |
| 1.00000     | 0.0211054 | 0.0314381 | 0.0433425 | 0.0563786 | 0.0701313 |
| 0.100000    | 0.0211054 | 0.0314381 | 0.0433425 | 0.0563786 | 0.0701313 |
| 0.0100000   | 0.0211054 | 0.0314381 | 0.0433425 | 0.0563786 | 0.0701313 |
| 0.00100000  | 0.0211054 | 0.0314381 | 0.0433425 | 0.0563786 | 0.0701313 |
| 0.000100000 | 0.0211054 | 0.0314381 | 0.0433425 | 0.0563786 | 0.0701313 |
| 1.00000e-05 | 0.0211054 | 0.0314381 | 0.0433425 | 0.0563786 | 0.0701313 |
| 1.00000e-06 | 0.0211054 | 0.0314381 | 0.0433425 | 0.0563786 | 0.0701313 |
| 1.00000e-07 | 0.0211054 | 0.0314381 | 0.0433425 | 0.0563786 | 0.0701313 |
| 1.00000e-08 | 0.0211054 | 0.0314381 | 0.0433425 | 0.0563786 | 0.0701313 |
| 1.00000e-09 | 0.0211054 | 0.0314381 | 0.0433425 | 0.0563786 | 0.0701313 |

| Pa\K        | 1400.00   | 1500.00   | 1750.00  | 2000.00  | 2250.00  |
|-------------|-----------|-----------|----------|----------|----------|
| 1.00000e+08 | 0.0842313 | 0.0984117 | 0.129819 | 0.160659 | 0.187221 |
| 1.00000e+07 | 0.0842416 | 0.0984211 | 0.131427 | 0.162533 | 0.189181 |
| 1.00000e+06 | 0.0842428 | 0.0984221 | 0.131600 | 0.162733 | 0.189389 |
| 100000.     | 0.0842429 | 0.0984222 | 0.131618 | 0.162755 | 0.189411 |
| 10000.0     | 0.0842429 | 0.0984223 | 0.131621 | 0.162758 | 0.189414 |
| 1000.00     | 0.0842429 | 0.0984223 | 0.131621 | 0.162758 | 0.189414 |
| 100.000     | 0.0842429 | 0.0984223 | 0.131621 | 0.162758 | 0.189414 |
| 10.0000     | 0.0842429 | 0.0984223 | 0.131621 | 0.162758 | 0.189414 |
| 1.00000     | 0.0842429 | 0.0984223 | 0.131621 | 0.162758 | 0.189414 |
| 0.100000    | 0.0842429 | 0.0984223 | 0.131621 | 0.162758 | 0.189414 |
| 0.0100000   | 0.0842429 | 0.0984223 | 0.131621 | 0.162758 | 0.189414 |
| 0.00100000  | 0.0842429 | 0.0984223 | 0.131621 | 0.162758 | 0.189414 |
| 0.000100000 | 0.0842429 | 0.0984223 | 0.131621 | 0.162758 | 0.189414 |
| 1.00000e-05 | 0.0842429 | 0.0984223 | 0.131621 | 0.162758 | 0.189414 |
| 1.00000e-06 | 0.0842429 | 0.0984223 | 0.131621 | 0.162758 | 0.189414 |
| 1.00000e-07 | 0.0842429 | 0.0984223 | 0.131621 | 0.162758 | 0.189414 |
| 1.00000e-08 | 0.0842429 | 0.0984223 | 0.131621 | 0.162758 | 0.189414 |
| 1.00000e-09 | 0.0842429 | 0.0984223 | 0.131621 | 0.162758 | 0.189414 |

rad19syn

=====

| Pa\K        | 20.0000     | 30.0000     | 40.0000     | 50.0000     | 60.0000     |
|-------------|-------------|-------------|-------------|-------------|-------------|
| 1.00000e+08 | 0.135199    | 0.0204673   | 0.00381482  | 0.000841486 | 0.000213569 |
| 1.00000e+07 | 1.83256e-07 | 1.18958e-11 | 2.13874e-14 | 2.47013e-16 | 9.17840e-18 |
| 1.00000e+06 | 2.49753e-23 | 1.10281e-26 | 2.67716e-28 | 2.20322e-29 | 4.46143e-30 |
| 100000.     | 7.76122e-33 | 7.02180e-34 | 3.71390e-34 | 3.53820e-34 | 4.46513e-34 |

|             |             |             |             |             |             |
|-------------|-------------|-------------|-------------|-------------|-------------|
| 10000.0     | 2.17008e-35 | 1.05395e-35 | 1.00469e-35 | 1.30002e-35 | 1.98236e-35 |
| 1000.00     | 1.43952e-36 | 8.58166e-37 | 8.74800e-37 | 1.17076e-36 | 1.82213e-36 |
| 100.000     | 1.38057e-37 | 8.40547e-38 | 8.62695e-38 | 1.15850e-37 | 1.80678e-37 |
| 10.0000     | 1.37480e-38 | 8.38803e-39 | 8.61493e-39 | 1.15728e-38 | 1.80525e-38 |
| 1.00000     | 1.37423e-39 | 8.38629e-40 | 8.61373e-40 | 1.15716e-39 | 1.80509e-39 |
| 0.100000    | 1.37417e-40 | 8.38612e-41 | 8.61361e-41 | 1.15715e-40 | 1.80508e-40 |
| 0.0100000   | 1.37416e-41 | 8.38610e-42 | 8.61360e-42 | 1.15714e-41 | 1.80508e-41 |
| 0.00100000  | 1.37416e-42 | 8.38610e-43 | 8.61360e-43 | 1.15714e-42 | 1.80508e-42 |
| 0.000100000 | 1.37416e-43 | 8.38610e-44 | 8.61360e-44 | 1.15714e-43 | 1.80508e-43 |
| 1.00000e-05 | 1.37416e-44 | 8.38610e-45 | 8.61360e-45 | 1.15714e-44 | 1.80508e-44 |
| 1.00000e-06 | 1.37416e-45 | 8.38610e-46 | 8.61360e-46 | 1.15714e-45 | 1.80508e-45 |
| 1.00000e-07 | 1.37416e-46 | 8.38610e-47 | 8.61360e-47 | 1.15714e-46 | 1.80508e-46 |
| 1.00000e-08 | 1.37416e-47 | 8.38610e-48 | 8.61360e-48 | 1.15714e-47 | 1.80508e-47 |
| 1.00000e-09 | 1.37416e-48 | 8.38610e-49 | 8.61360e-49 | 1.15714e-48 | 1.80508e-48 |

| Pa\K        | 70.0000     | 80.0000     | 90.0000     | 100.000     | 110.000     |
|-------------|-------------|-------------|-------------|-------------|-------------|
| 1.00000e+08 | 6.10776e-05 | 1.93729e-05 | 6.73286e-06 | 2.54000e-06 | 1.03264e-06 |
| 1.00000e+07 | 7.51663e-19 | 1.08336e-19 | 2.38498e-20 | 7.30432e-21 | 2.91880e-21 |
| 1.00000e+06 | 1.95173e-30 | 1.43904e-30 | 1.43159e-30 | 1.71375e-30 | 2.34440e-30 |
| 100000.     | 6.58584e-34 | 1.07216e-33 | 1.87574e-33 | 3.48356e-33 | 6.83137e-33 |
| 10000.0     | 3.32731e-35 | 5.95243e-35 | 1.11926e-34 | 2.20102e-34 | 4.52245e-34 |
| 1000.00     | 3.10083e-36 | 5.60285e-36 | 1.06154e-35 | 2.10002e-35 | 4.33593e-35 |
| 100.000     | 3.07897e-37 | 5.56894e-37 | 1.05592e-36 | 2.09016e-36 | 4.31767e-36 |
| 10.0000     | 3.07679e-38 | 5.56556e-38 | 1.05536e-37 | 2.08918e-37 | 4.31585e-37 |
| 1.00000     | 3.07657e-39 | 5.56522e-39 | 1.05531e-38 | 2.08908e-38 | 4.31566e-38 |
| 0.100000    | 3.07655e-40 | 5.56519e-40 | 1.05530e-39 | 2.08907e-39 | 4.31565e-39 |
| 0.0100000   | 3.07655e-41 | 5.56519e-41 | 1.05530e-40 | 2.08907e-40 | 4.31564e-40 |
| 0.00100000  | 3.07655e-42 | 5.56519e-42 | 1.05530e-41 | 2.08907e-41 | 4.31564e-41 |
| 0.000100000 | 3.07655e-43 | 5.56519e-43 | 1.05530e-42 | 2.08907e-42 | 4.31564e-42 |
| 1.00000e-05 | 3.07655e-44 | 5.56519e-44 | 1.05530e-43 | 2.08907e-43 | 4.31564e-43 |
| 1.00000e-06 | 3.07655e-45 | 5.56519e-45 | 1.05530e-44 | 2.08907e-44 | 4.31564e-44 |
| 1.00000e-07 | 3.07655e-46 | 5.56519e-46 | 1.05530e-45 | 2.08907e-45 | 4.31564e-45 |
| 1.00000e-08 | 3.07655e-47 | 5.56519e-47 | 1.05530e-46 | 2.08907e-46 | 4.31564e-46 |
| 1.00000e-09 | 3.07655e-48 | 5.56519e-48 | 1.05530e-47 | 2.08907e-47 | 4.31564e-47 |

| Pa\K        | 120.000     | 130.000     | 140.000     | 150.000     | 160.000     |
|-------------|-------------|-------------|-------------|-------------|-------------|
| 1.00000e+08 | 4.49890e-07 | 2.09128e-07 | 1.03374e-07 | 5.41996e-08 | 3.00842e-08 |
| 1.00000e+07 | 1.45421e-21 | 8.74106e-22 | 6.18746e-22 | 5.06572e-22 | 4.73144e-22 |
| 1.00000e+06 | 3.57288e-30 | 5.97957e-30 | 1.08912e-29 | 2.14579e-29 | 4.55295e-29 |
| 100000.     | 1.41177e-32 | 3.07321e-32 | 7.04817e-32 | 1.70371e-31 | 4.34229e-31 |
| 10000.0     | 9.71731e-34 | 2.18658e-33 | 5.16045e-33 | 1.27909e-32 | 3.33334e-32 |
| 1000.00     | 9.35424e-35 | 2.11210e-34 | 4.99941e-34 | 1.24238e-33 | 3.24506e-33 |
| 100.000     | 9.31861e-36 | 2.10478e-35 | 4.98356e-35 | 1.23876e-34 | 3.23634e-34 |
| 10.0000     | 9.31505e-37 | 2.10405e-36 | 4.98198e-36 | 1.23840e-35 | 3.23547e-35 |
| 1.00000     | 9.31470e-38 | 2.10398e-37 | 4.98182e-37 | 1.23836e-36 | 3.23539e-36 |
| 0.100000    | 9.31466e-39 | 2.10397e-38 | 4.98181e-38 | 1.23836e-37 | 3.23538e-37 |
| 0.0100000   | 9.31466e-40 | 2.10397e-39 | 4.98180e-39 | 1.23836e-38 | 3.23538e-38 |
| 0.00100000  | 9.31466e-41 | 2.10397e-40 | 4.98180e-40 | 1.23836e-39 | 3.23538e-39 |
| 0.000100000 | 9.31466e-42 | 2.10397e-41 | 4.98180e-41 | 1.23836e-40 | 3.23538e-40 |
| 1.00000e-05 | 9.31466e-43 | 2.10397e-42 | 4.98180e-42 | 1.23836e-41 | 3.23538e-41 |
| 1.00000e-06 | 9.31466e-44 | 2.10397e-43 | 4.98180e-43 | 1.23836e-42 | 3.23538e-42 |
| 1.00000e-07 | 9.31466e-45 | 2.10397e-44 | 4.98180e-44 | 1.23836e-43 | 3.23538e-43 |
| 1.00000e-08 | 9.31466e-46 | 2.10397e-45 | 4.98180e-45 | 1.23836e-44 | 3.23538e-44 |
| 1.00000e-09 | 9.31466e-47 | 2.10397e-46 | 4.98180e-46 | 1.23836e-45 | 3.23538e-45 |

| Pa\K        | 170.000     | 180.000     | 190.000     | 200.000     | 210.000     |
|-------------|-------------|-------------|-------------|-------------|-------------|
| 1.00000e+08 | 1.76540e-08 | 1.09420e-08 | 7.15895e-09 | 4.94259e-09 | 3.60047e-09 |
| 1.00000e+07 | 4.98787e-22 | 5.88357e-22 | 7.70930e-22 | 1.11509e-21 | 1.77054e-21 |
| 1.00000e+06 | 1.03690e-28 | 2.52778e-28 | 6.58073e-28 | 1.82551e-27 | 5.38418e-27 |
| 100000.     | 1.16727e-30 | 3.30969e-30 | 9.89671e-30 | 3.11946e-29 | 1.03563e-28 |
| 10000.0     | 9.14047e-32 | 2.63862e-31 | 8.01975e-31 | 2.56581e-30 | 8.63574e-30 |
| 1000.00     | 8.91654e-33 | 2.57870e-32 | 7.85071e-32 | 2.51555e-31 | 8.47842e-31 |
| 100.000     | 8.89442e-34 | 2.57278e-33 | 7.83398e-33 | 2.51057e-32 | 8.46283e-32 |
| 10.0000     | 8.89221e-35 | 2.57219e-34 | 7.83231e-34 | 2.51007e-33 | 8.46127e-33 |
| 1.00000     | 8.89198e-36 | 2.57213e-35 | 7.83214e-35 | 2.51002e-34 | 8.46112e-34 |
| 0.100000    | 8.89196e-37 | 2.57212e-36 | 7.83213e-36 | 2.51002e-35 | 8.46110e-35 |
| 0.0100000   | 8.89196e-38 | 2.57212e-37 | 7.83212e-37 | 2.51002e-36 | 8.46110e-36 |
| 0.00100000  | 8.89196e-39 | 2.57212e-38 | 7.83212e-38 | 2.51002e-37 | 8.46110e-37 |
| 0.000100000 | 8.89196e-40 | 2.57212e-39 | 7.83212e-39 | 2.51002e-38 | 8.46110e-38 |
| 1.00000e-05 | 8.89196e-41 | 2.57212e-40 | 7.83212e-40 | 2.51002e-39 | 8.46110e-39 |
| 1.00000e-06 | 8.89196e-42 | 2.57212e-41 | 7.83212e-41 | 2.51002e-40 | 8.46110e-40 |
| 1.00000e-07 | 8.89196e-43 | 2.57212e-42 | 7.83212e-42 | 2.51002e-41 | 8.46110e-41 |
| 1.00000e-08 | 8.89196e-44 | 2.57212e-43 | 7.83212e-43 | 2.51002e-42 | 8.46110e-42 |
| 1.00000e-09 | 8.89196e-45 | 2.57212e-44 | 7.83212e-44 | 2.51002e-43 | 8.46110e-43 |

| Pa\K | 220.000 | 230.000 | 240.000 | 250.000 | 260.000 |
|------|---------|---------|---------|---------|---------|
|------|---------|---------|---------|---------|---------|



|             |             |             |             |             |             |
|-------------|-------------|-------------|-------------|-------------|-------------|
| 1.00000e+08 | 2.76735e-09 | 2.24439e-09 | 1.92079e-09 | 1.73461e-09 | 1.65268e-09 |
| 1.00000e+07 | 3.07022e-21 | 5.78657e-21 | 1.17987e-20 | 2.59053e-20 | 6.09578e-20 |
| 1.00000e+06 | 1.68451e-26 | 5.57631e-26 | 1.94769e-25 | 7.15505e-25 | 2.75469e-24 |
| 100000.     | 3.61696e-28 | 1.32679e-27 | 5.10125e-27 | 2.05050e-26 | 8.59045e-26 |
| 10000.0     | 3.05447e-29 | 1.13368e-28 | 4.40657e-28 | 1.78935e-27 | 7.56793e-27 |
| 1000.00     | 3.00269e-30 | 1.11579e-29 | 4.34185e-29 | 1.76489e-28 | 7.47167e-28 |
| 100.000     | 2.99756e-31 | 1.11401e-30 | 4.33542e-30 | 1.76246e-29 | 7.46211e-29 |
| 10.0000     | 2.99704e-32 | 1.11383e-31 | 4.33477e-31 | 1.76222e-30 | 7.46115e-30 |
| 1.00000     | 2.99699e-33 | 1.11382e-32 | 4.33471e-32 | 1.76220e-31 | 7.46105e-31 |
| 0.100000    | 2.99699e-34 | 1.11381e-33 | 4.33470e-33 | 1.76219e-32 | 7.46104e-32 |
| 0.0100000   | 2.99699e-35 | 1.11381e-34 | 4.33470e-34 | 1.76219e-33 | 7.46104e-33 |
| 0.00100000  | 2.99699e-36 | 1.11381e-35 | 4.33470e-35 | 1.76219e-34 | 7.46104e-34 |
| 0.000100000 | 2.99699e-37 | 1.11381e-36 | 4.33470e-36 | 1.76219e-35 | 7.46104e-35 |
| 1.00000e-05 | 2.99699e-38 | 1.11381e-37 | 4.33470e-37 | 1.76219e-36 | 7.46104e-36 |
| 1.00000e-06 | 2.99699e-39 | 1.11381e-38 | 4.33470e-38 | 1.76219e-37 | 7.46104e-37 |
| 1.00000e-07 | 2.99699e-40 | 1.11381e-39 | 4.33470e-39 | 1.76219e-38 | 7.46104e-38 |
| 1.00000e-08 | 2.99699e-41 | 1.11381e-40 | 4.33470e-40 | 1.76219e-39 | 7.46104e-39 |
| 1.00000e-09 | 2.99699e-42 | 1.11381e-41 | 4.33470e-41 | 1.76219e-40 | 7.46104e-40 |

Pa\K | 270.000 280.000 290.000 300.000 310.000

|             |             |             |             |             |             |
|-------------|-------------|-------------|-------------|-------------|-------------|
| 1.00000e+08 | 1.66061e-09 | 1.75856e-09 | 1.96078e-09 | 1.33247e-08 | 2.82833e-09 |
| 1.00000e+07 | 1.52975e-19 | 4.07303e-19 | 1.14434e-18 | 5.88244e-15 | 1.03678e-17 |
| 1.00000e+06 | 1.10704e-23 | 4.62335e-23 | 1.99681e-22 | 1.85609e-17 | 4.03150e-21 |
| 100000.     | 3.73763e-25 | 1.68201e-24 | 7.79336e-24 | 1.18375e-18 | 1.78884e-22 |
| 10000.0     | 3.32212e-26 | 1.50750e-25 | 7.03943e-25 | 1.12973e-19 | 1.63881e-23 |
| 1000.00     | 3.28282e-27 | 1.49092e-26 | 6.96753e-26 | 1.12445e-20 | 1.62439e-24 |
| 100.000     | 3.27891e-28 | 1.48927e-27 | 6.96036e-27 | 1.12392e-21 | 1.62295e-25 |
| 10.0000     | 3.27852e-29 | 1.48911e-28 | 6.95965e-28 | 1.12387e-22 | 1.62281e-26 |
| 1.00000     | 3.27848e-30 | 1.48910e-29 | 6.95958e-29 | 1.12386e-23 | 1.62279e-27 |
| 0.100000    | 3.27847e-31 | 1.48909e-30 | 6.95957e-30 | 1.12386e-24 | 1.62279e-28 |
| 0.0100000   | 3.27847e-32 | 1.48909e-31 | 6.95957e-31 | 1.12386e-25 | 1.62279e-29 |
| 0.00100000  | 3.27847e-33 | 1.48909e-32 | 6.95957e-32 | 1.12386e-26 | 1.62279e-30 |
| 0.000100000 | 3.27847e-34 | 1.48909e-33 | 6.95957e-33 | 1.12386e-27 | 1.62279e-31 |
| 1.00000e-05 | 3.27847e-35 | 1.48909e-34 | 6.95957e-34 | 1.12386e-28 | 1.62279e-32 |
| 1.00000e-06 | 3.27847e-36 | 1.48909e-35 | 6.95957e-35 | 1.12386e-29 | 1.62279e-33 |
| 1.00000e-07 | 3.27847e-37 | 1.48909e-36 | 6.95957e-36 | 1.12386e-30 | 1.62279e-34 |
| 1.00000e-08 | 3.27847e-38 | 1.48909e-37 | 6.95957e-37 | 1.12386e-31 | 1.62279e-35 |
| 1.00000e-09 | 3.27847e-39 | 1.48909e-38 | 6.95957e-38 | 1.12386e-32 | 1.62279e-36 |

Pa\K | 400.000 500.000 600.000 700.000 800.000

|             |             |             |             |             |             |
|-------------|-------------|-------------|-------------|-------------|-------------|
| 1.00000e+08 | 7.76055e-07 | 5.51595e-05 | 0.000639952 | 0.00143344  | 0.00166275  |
| 1.00000e+07 | 1.26767e-10 | 3.14785e-07 | 2.05989e-05 | 9.88518e-05 | 0.000149955 |
| 1.00000e+06 | 2.55606e-12 | 1.60139e-08 | 1.57894e-06 | 8.99404e-06 | 1.45098e-05 |
| 100000.     | 2.09185e-13 | 1.47382e-09 | 1.52861e-07 | 8.89061e-07 | 1.44497e-06 |
| 10000.0     | 2.04905e-14 | 1.46129e-10 | 1.52354e-08 | 8.88007e-08 | 1.44435e-07 |
| 1000.00     | 2.04481e-15 | 1.46005e-11 | 1.52303e-09 | 8.87901e-09 | 1.44429e-08 |
| 100.000     | 2.04439e-16 | 1.45992e-12 | 1.52297e-10 | 8.87890e-10 | 1.44428e-09 |
| 10.0000     | 2.04435e-17 | 1.45991e-13 | 1.52297e-11 | 8.87889e-11 | 1.44428e-10 |
| 1.00000     | 2.04434e-18 | 1.45990e-14 | 1.52297e-12 | 8.87889e-12 | 1.44428e-11 |
| 0.100000    | 2.04434e-19 | 1.45990e-15 | 1.52297e-13 | 8.87889e-13 | 1.44428e-12 |
| 0.0100000   | 2.04434e-20 | 1.45990e-16 | 1.52297e-14 | 8.87889e-14 | 1.44428e-13 |
| 0.00100000  | 2.04434e-21 | 1.45990e-17 | 1.52297e-15 | 8.87889e-15 | 1.44428e-14 |
| 0.000100000 | 2.04434e-22 | 1.45990e-18 | 1.52297e-16 | 8.87889e-16 | 1.44428e-15 |
| 1.00000e-05 | 2.04434e-23 | 1.45990e-19 | 1.52297e-17 | 8.87889e-17 | 1.44428e-16 |
| 1.00000e-06 | 2.04434e-24 | 1.45990e-20 | 1.52297e-18 | 8.87889e-18 | 1.44428e-17 |
| 1.00000e-07 | 2.04434e-25 | 1.45990e-21 | 1.52297e-19 | 8.87889e-19 | 1.44428e-18 |
| 1.00000e-08 | 2.04434e-26 | 1.45990e-22 | 1.52297e-20 | 8.87889e-20 | 1.44428e-19 |
| 1.00000e-09 | 2.04434e-27 | 1.45990e-23 | 1.52297e-21 | 8.87889e-21 | 1.44428e-20 |

Pa\K | 900.000 1000.00 1100.00 1200.00 1300.00

|             |             |             |             |             |             |
|-------------|-------------|-------------|-------------|-------------|-------------|
| 1.00000e+08 | 0.00162062  | 0.00150175  | 0.00135275  | 0.00120398  | 0.00106810  |
| 1.00000e+07 | 0.000154544 | 0.000144381 | 0.000129962 | 0.000115316 | 0.000101924 |
| 1.00000e+06 | 1.52081e-05 | 1.42681e-05 | 1.28584e-05 | 1.14127e-05 | 1.00872e-05 |
| 100000.     | 1.51772e-06 | 1.42471e-06 | 1.28418e-06 | 1.13986e-06 | 1.00749e-06 |
| 10000.0     | 1.51739e-07 | 1.42448e-07 | 1.28400e-07 | 1.13972e-07 | 1.00737e-07 |
| 1000.00     | 1.51736e-08 | 1.42446e-08 | 1.28398e-08 | 1.13970e-08 | 1.00735e-08 |
| 100.000     | 1.51736e-09 | 1.42446e-09 | 1.28398e-09 | 1.13970e-09 | 1.00735e-09 |
| 10.0000     | 1.51736e-10 | 1.42446e-10 | 1.28398e-10 | 1.13970e-10 | 1.00735e-10 |
| 1.00000     | 1.51736e-11 | 1.42446e-11 | 1.28398e-11 | 1.13970e-11 | 1.00735e-11 |
| 0.100000    | 1.51736e-12 | 1.42446e-12 | 1.28398e-12 | 1.13970e-12 | 1.00735e-12 |
| 0.0100000   | 1.51736e-13 | 1.42446e-13 | 1.28398e-13 | 1.13970e-13 | 1.00735e-13 |
| 0.00100000  | 1.51736e-14 | 1.42446e-14 | 1.28398e-14 | 1.13970e-14 | 1.00735e-14 |
| 0.000100000 | 1.51736e-15 | 1.42446e-15 | 1.28398e-15 | 1.13970e-15 | 1.00735e-15 |
| 1.00000e-05 | 1.51736e-16 | 1.42446e-16 | 1.28398e-16 | 1.13970e-16 | 1.00735e-16 |
| 1.00000e-06 | 1.51736e-17 | 1.42446e-17 | 1.28398e-17 | 1.13970e-17 | 1.00735e-17 |
| 1.00000e-07 | 1.51736e-18 | 1.42446e-18 | 1.28398e-18 | 1.13970e-18 | 1.00735e-18 |
| 1.00000e-08 | 1.51736e-19 | 1.42446e-19 | 1.28398e-19 | 1.13970e-19 | 1.00735e-19 |

1.00000e-09 | 1.51736e-20 1.42446e-20 1.28398e-20 1.13970e-20 1.00735e-20

Pa\K | 1400.00 1500.00 1750.00 2000.00 2250.00

|             | 1400.00     | 1500.00     | 1750.00 | 2000.00 | 2250.00 |
|-------------|-------------|-------------|---------|---------|---------|
| 1.00000e+08 | 0.000948439 | 0.000844602 | N/A     | N/A     | N/A     |
| 1.00000e+07 | 9.01721e-05 | 8.00275e-05 | N/A     | N/A     | N/A     |
| 1.00000e+06 | 8.92320e-06 | 7.91842e-06 | N/A     | N/A     | N/A     |
| 100000.     | 8.91242e-07 | 7.90885e-07 | N/A     | N/A     | N/A     |
| 10000.0     | 8.91130e-08 | 7.90785e-08 | N/A     | N/A     | N/A     |
| 1000.00     | 8.91116e-09 | 7.90771e-09 | N/A     | N/A     | N/A     |
| 100.000     | 8.91116e-10 | 7.90771e-10 | N/A     | N/A     | N/A     |
| 10.0000     | 8.91116e-11 | 7.90771e-11 | N/A     | N/A     | N/A     |
| 1.00000     | 8.91116e-12 | 7.90771e-12 | N/A     | N/A     | N/A     |
| 0.100000    | 8.91116e-13 | 7.90771e-13 | N/A     | N/A     | N/A     |
| 0.0100000   | 8.91116e-14 | 7.90771e-14 | N/A     | N/A     | N/A     |
| 0.00100000  | 8.91116e-15 | 7.90771e-15 | N/A     | N/A     | N/A     |
| 0.000100000 | 8.91116e-16 | 7.90771e-16 | N/A     | N/A     | N/A     |
| 1.00000e-05 | 8.91116e-17 | 7.90771e-17 | N/A     | N/A     | N/A     |
| 1.00000e-06 | 8.91116e-18 | 7.90771e-18 | N/A     | N/A     | N/A     |
| 1.00000e-07 | 8.91116e-19 | 7.90771e-19 | N/A     | N/A     | N/A     |
| 1.00000e-08 | 8.91116e-20 | 7.90771e-20 | N/A     | N/A     | N/A     |
| 1.00000e-09 | 8.91116e-21 | 7.90771e-21 | N/A     | N/A     | N/A     |

PhcycC3H3\_A+H

=====

Pa\K | 20.0000 30.0000 40.0000 50.0000 60.0000

|             | 20.0000     | 30.0000     | 40.0000     | 50.0000     | 60.0000     |
|-------------|-------------|-------------|-------------|-------------|-------------|
| 1.00000e+08 | 1.00649e-16 | 2.17924e-16 | 3.72484e-16 | 5.87159e-16 | 8.86760e-16 |
| 1.00000e+07 | 9.74627e-16 | 2.08557e-15 | 3.53883e-15 | 5.54780e-15 | 8.34447e-15 |
| 1.00000e+06 | 9.22155e-15 | 1.94934e-14 | 3.25577e-14 | 5.01459e-14 | 7.40071e-14 |
| 100000.     | 7.58459e-14 | 1.37771e-13 | 2.02581e-13 | 2.79026e-13 | 3.72197e-13 |
| 10000.0     | 2.80467e-13 | 3.54252e-13 | 4.27043e-13 | 5.15990e-13 | 6.25892e-13 |
| 1000.00     | 3.84872e-13 | 4.20664e-13 | 4.80519e-13 | 5.64106e-13 | 6.71911e-13 |
| 100.000     | 3.99919e-13 | 4.29025e-13 | 4.87148e-13 | 5.70236e-13 | 6.78092e-13 |
| 10.0000     | 4.02654e-13 | 4.31863e-13 | 4.90598e-13 | 5.74524e-13 | 6.83428e-13 |
| 1.00000     | 4.06060e-13 | 4.35577e-13 | 4.94735e-13 | 5.79234e-13 | 6.88848e-13 |
| 0.100000    | 4.09821e-13 | 4.39781e-13 | 4.99288e-13 | 5.84117e-13 | 6.94064e-13 |
| 0.0100000   | 4.12988e-13 | 4.42056e-13 | 5.01131e-13 | 5.85721e-13 | 6.95526e-13 |
| 0.00100000  | 4.13603e-13 | 4.42384e-13 | 5.01367e-13 | 5.85915e-13 | 6.95696e-13 |
| 0.000100000 | 4.13670e-13 | 4.42418e-13 | 5.01392e-13 | 5.85935e-13 | 6.95713e-13 |
| 1.00000e-05 | 4.13677e-13 | 4.42422e-13 | 5.01394e-13 | 5.85937e-13 | 6.95715e-13 |
| 1.00000e-06 | 4.13677e-13 | 4.42422e-13 | 5.01394e-13 | 5.85937e-13 | 6.95715e-13 |
| 1.00000e-07 | 4.13677e-13 | 4.42422e-13 | 5.01394e-13 | 5.85937e-13 | 6.95715e-13 |
| 1.00000e-08 | 4.13677e-13 | 4.42422e-13 | 5.01394e-13 | 5.85937e-13 | 6.95715e-13 |
| 1.00000e-09 | 4.13677e-13 | 4.42422e-13 | 5.01394e-13 | 5.85937e-13 | 6.95715e-13 |

Pa\K | 70.0000 80.0000 90.0000 100.0000 110.0000

|             | 70.0000     | 80.0000     | 90.0000     | 100.0000    | 110.0000    |
|-------------|-------------|-------------|-------------|-------------|-------------|
| 1.00000e+08 | 1.30593e-15 | 1.89459e-15 | 2.72513e-15 | 3.90398e-15 | 5.58978e-15 |
| 1.00000e+07 | 1.22538e-14 | 1.77436e-14 | 2.54912e-14 | 3.64898e-14 | 5.22168e-14 |
| 1.00000e+06 | 1.06504e-13 | 1.50919e-13 | 2.11833e-13 | 2.95695e-13 | 4.11699e-13 |
| 100000.     | 4.87844e-13 | 6.33212e-13 | 8.17629e-13 | 1.05341e-12 | 1.35712e-12 |
| 10000.0     | 7.62517e-13 | 9.33426e-13 | 1.14840e-12 | 1.42038e-12 | 1.76675e-12 |
| 1000.00     | 8.08299e-13 | 9.80269e-13 | 1.19736e-12 | 1.47241e-12 | 1.82282e-12 |
| 100.000     | 8.14906e-13 | 9.87646e-13 | 1.20588e-12 | 1.48254e-12 | 1.83516e-12 |
| 10.0000     | 8.21534e-13 | 9.95869e-13 | 1.21608e-12 | 1.49520e-12 | 1.85090e-12 |
| 1.00000     | 8.27811e-13 | 1.00317e-12 | 1.22461e-12 | 1.50519e-12 | 1.86265e-12 |
| 0.100000    | 8.33379e-13 | 1.00912e-12 | 1.23098e-12 | 1.51204e-12 | 1.87002e-12 |
| 0.0100000   | 8.34753e-13 | 1.01044e-12 | 1.23228e-12 | 1.51332e-12 | 1.87132e-12 |
| 0.00100000  | 8.34908e-13 | 1.01059e-12 | 1.23242e-12 | 1.51346e-12 | 1.87146e-12 |
| 0.000100000 | 8.34924e-13 | 1.01060e-12 | 1.23243e-12 | 1.51348e-12 | 1.87147e-12 |
| 1.00000e-05 | 8.34925e-13 | 1.01061e-12 | 1.23243e-12 | 1.51348e-12 | 1.87147e-12 |
| 1.00000e-06 | 8.34926e-13 | 1.01061e-12 | 1.23243e-12 | 1.51348e-12 | 1.87147e-12 |
| 1.00000e-07 | 8.34926e-13 | 1.01061e-12 | 1.23243e-12 | 1.51348e-12 | 1.87147e-12 |
| 1.00000e-08 | 8.34926e-13 | 1.01061e-12 | 1.23243e-12 | 1.51348e-12 | 1.87147e-12 |
| 1.00000e-09 | 8.34926e-13 | 1.01061e-12 | 1.23243e-12 | 1.51348e-12 | 1.87147e-12 |

Pa\K | 120.0000 130.0000 140.0000 150.0000 160.0000

|             | 120.0000    | 130.0000    | 140.0000    | 150.0000    | 160.0000    |
|-------------|-------------|-------------|-------------|-------------|-------------|
| 1.00000e+08 | 8.02209e-15 | 1.15666e-14 | 1.67871e-14 | 2.45613e-14 | 3.62695e-14 |
| 1.00000e+07 | 7.48953e-14 | 1.07905e-13 | 1.56428e-13 | 2.28477e-13 | 3.36537e-13 |
| 1.00000e+06 | 5.73050e-13 | 7.98817e-13 | 1.11661e-12 | 1.56644e-12 | 2.20633e-12 |
| 100000.     | 1.75133e-12 | 2.26688e-12 | 2.94604e-12 | 3.84669e-12 | 5.04808e-12 |
| 10000.0     | 2.21112e-12 | 2.78560e-12 | 3.53390e-12 | 4.51550e-12 | 5.81125e-12 |
| 1000.00     | 2.27226e-12 | 2.85300e-12 | 3.60895e-12 | 4.59985e-12 | 5.90691e-12 |
| 100.000     | 2.28762e-12 | 2.87248e-12 | 3.63408e-12 | 4.63279e-12 | 5.95066e-12 |
| 10.0000     | 2.30724e-12 | 2.89700e-12 | 3.66485e-12 | 4.67156e-12 | 5.99971e-12 |
| 1.00000     | 2.32110e-12 | 2.91344e-12 | 3.68443e-12 | 4.69497e-12 | 6.02785e-12 |
| 0.100000    | 2.32907e-12 | 2.92209e-12 | 3.69385e-12 | 4.70529e-12 | 6.03919e-12 |
| 0.0100000   | 2.33040e-12 | 2.92345e-12 | 3.69526e-12 | 4.70677e-12 | 6.04075e-12 |

|             |             |             |             |             |             |
|-------------|-------------|-------------|-------------|-------------|-------------|
| 0.00100000  | 2.33053e-12 | 2.92359e-12 | 3.69541e-12 | 4.70692e-12 | 6.04091e-12 |
| 0.00100000  | 2.33055e-12 | 2.92360e-12 | 3.69543e-12 | 4.70694e-12 | 6.04093e-12 |
| 1.00000e-05 | 2.33055e-12 | 2.92361e-12 | 3.69543e-12 | 4.70694e-12 | 6.04093e-12 |
| 1.00000e-06 | 2.33055e-12 | 2.92361e-12 | 3.69543e-12 | 4.70694e-12 | 6.04093e-12 |
| 1.00000e-07 | 2.33055e-12 | 2.92361e-12 | 3.69543e-12 | 4.70694e-12 | 6.04093e-12 |
| 1.00000e-08 | 2.33055e-12 | 2.92361e-12 | 3.69543e-12 | 4.70694e-12 | 6.04093e-12 |
| 1.00000e-09 | 2.33055e-12 | 2.92361e-12 | 3.69543e-12 | 4.70694e-12 | 6.04093e-12 |

| Pa\K        | 170.000     | 180.000     | 190.000     | 200.000     | 210.000     |
|-------------|-------------|-------------|-------------|-------------|-------------|
| 1.00000e+08 | 5.41041e-14 | 8.15903e-14 | 1.24473e-13 | 1.92260e-13 | 3.00990e-13 |
| 1.00000e+07 | 5.00216e-13 | 7.50581e-13 | 1.13730e-12 | 1.74067e-12 | 2.69193e-12 |
| 1.00000e+06 | 3.12029e-12 | 4.42987e-12 | 6.31050e-12 | 9.01490e-12 | 1.29062e-11 |
| 100000.     | 6.65844e-12 | 8.82545e-12 | 1.17500e-11 | 1.57049e-11 | 2.10593e-11 |
| 10000.0     | 7.53086e-12 | 9.82295e-12 | 1.28885e-11 | 1.69983e-11 | 2.25170e-11 |
| 1000.00     | 7.64030e-12 | 9.94922e-12 | 1.30353e-11 | 1.71706e-11 | 2.27208e-11 |
| 100.000     | 7.69909e-12 | 1.00290e-11 | 1.31444e-11 | 1.73206e-11 | 2.29279e-11 |
| 10.0000     | 7.76139e-12 | 1.01084e-11 | 1.32459e-11 | 1.74507e-11 | 2.30949e-11 |
| 1.00000     | 7.79535e-12 | 1.01496e-11 | 1.32959e-11 | 1.75117e-11 | 2.31693e-11 |
| 0.100000    | 7.80787e-12 | 1.01635e-11 | 1.33114e-11 | 1.75290e-11 | 2.31888e-11 |
| 0.0100000   | 7.80954e-12 | 1.01653e-11 | 1.33133e-11 | 1.75311e-11 | 2.31911e-11 |
| 0.00100000  | 7.80971e-12 | 1.01654e-11 | 1.33135e-11 | 1.75313e-11 | 2.31914e-11 |
| 0.000100000 | 7.80973e-12 | 1.01655e-11 | 1.33135e-11 | 1.75314e-11 | 2.31914e-11 |
| 1.00000e-05 | 7.80973e-12 | 1.01655e-11 | 1.33135e-11 | 1.75314e-11 | 2.31914e-11 |
| 1.00000e-06 | 7.80973e-12 | 1.01655e-11 | 1.33135e-11 | 1.75314e-11 | 2.31914e-11 |
| 1.00000e-07 | 7.80973e-12 | 1.01655e-11 | 1.33135e-11 | 1.75314e-11 | 2.31914e-11 |
| 1.00000e-08 | 7.80973e-12 | 1.01655e-11 | 1.33135e-11 | 1.75314e-11 | 2.31914e-11 |
| 1.00000e-09 | 7.80973e-12 | 1.01655e-11 | 1.33135e-11 | 1.75314e-11 | 2.31914e-11 |

| Pa\K        | 220.000     | 230.000     | 240.000     | 250.000     | 260.000     |
|-------------|-------------|-------------|-------------|-------------|-------------|
| 1.00000e+08 | 4.78304e-13 | 7.73002e-13 | 1.27335e-12 | 2.14214e-12 | 3.68216e-12 |
| 1.00000e+07 | 4.20856e-12 | 6.65591e-12 | 1.06558e-11 | 1.72764e-11 | 2.83538e-11 |
| 1.00000e+06 | 1.85047e-11 | 2.65543e-11 | 3.81151e-11 | 5.46926e-11 | 7.84166e-11 |
| 100000.     | 2.83111e-11 | 3.81300e-11 | 5.14130e-11 | 6.93559e-11 | 9.35458e-11 |
| 10000.0     | 2.99330e-11 | 3.98992e-11 | 5.32842e-11 | 7.12389e-11 | 9.52798e-11 |
| 1000.00     | 3.01764e-11 | 4.01926e-11 | 5.36418e-11 | 7.16793e-11 | 9.58291e-11 |
| 100.000     | 3.04627e-11 | 4.05886e-11 | 5.41885e-11 | 7.24326e-11 | 9.68630e-11 |
| 10.0000     | 3.06773e-11 | 4.08645e-11 | 5.45432e-11 | 7.28881e-11 | 9.74470e-11 |
| 1.00000     | 3.07683e-11 | 4.09757e-11 | 5.46790e-11 | 7.30538e-11 | 9.76488e-11 |
| 0.100000    | 3.07903e-11 | 4.10006e-11 | 5.47073e-11 | 7.30860e-11 | 9.76855e-11 |
| 0.0100000   | 3.07928e-11 | 4.10035e-11 | 5.47105e-11 | 7.30896e-11 | 9.76895e-11 |
| 0.00100000  | 3.07931e-11 | 4.10037e-11 | 5.47108e-11 | 7.30899e-11 | 9.76899e-11 |
| 0.000100000 | 3.07931e-11 | 4.10038e-11 | 5.47108e-11 | 7.30900e-11 | 9.76900e-11 |
| 1.00000e-05 | 3.07931e-11 | 4.10038e-11 | 5.47108e-11 | 7.30900e-11 | 9.76900e-11 |
| 1.00000e-06 | 3.07931e-11 | 4.10038e-11 | 5.47108e-11 | 7.30900e-11 | 9.76900e-11 |
| 1.00000e-07 | 3.07931e-11 | 4.10038e-11 | 5.47108e-11 | 7.30900e-11 | 9.76900e-11 |
| 1.00000e-08 | 3.07931e-11 | 4.10038e-11 | 5.47108e-11 | 7.30900e-11 | 9.76900e-11 |
| 1.00000e-09 | 3.07931e-11 | 4.10038e-11 | 5.47108e-11 | 7.30900e-11 | 9.76900e-11 |

| Pa\K        | 270.000     | 280.000     | 290.000     | 300.000     | 310.000     |
|-------------|-------------|-------------|-------------|-------------|-------------|
| 1.00000e+08 | 6.45146e-12 | 1.14480e-11 | 2.03666e-11 | 6.09241e-09 | 6.19111e-11 |
| 1.00000e+07 | 4.70056e-11 | 7.83720e-11 | 1.30536e-10 | 5.76274e-09 | 3.49101e-10 |
| 1.00000e+06 | 1.12280e-10 | 1.60447e-10 | 2.28624e-10 | 9.79029e-10 | 4.57825e-10 |
| 100000.     | 1.26076e-10 | 1.69685e-10 | 2.27921e-10 | 3.75803e-10 | 4.07507e-10 |
| 10000.0     | 1.27393e-10 | 1.70157e-10 | 2.26886e-10 | 3.25285e-10 | 4.00017e-10 |
| 1000.00     | 1.28087e-10 | 1.71042e-10 | 2.28027e-10 | 3.24163e-10 | 4.01962e-10 |
| 100.000     | 1.29498e-10 | 1.72961e-10 | 2.30617e-10 | 3.24693e-10 | 4.06575e-10 |
| 10.0000     | 1.30246e-10 | 1.73914e-10 | 2.31829e-10 | 3.25067e-10 | 4.08508e-10 |
| 1.00000     | 1.30491e-10 | 1.74211e-10 | 2.32187e-10 | 3.25258e-10 | 4.09021e-10 |
| 0.100000    | 1.30533e-10 | 1.74259e-10 | 2.32242e-10 | 3.25286e-10 | 4.09093e-10 |
| 0.0100000   | 1.30537e-10 | 1.74264e-10 | 2.32248e-10 | 3.25289e-10 | 4.09101e-10 |
| 0.00100000  | 1.30538e-10 | 1.74264e-10 | 2.32248e-10 | 3.25290e-10 | 4.09102e-10 |
| 0.000100000 | 1.30538e-10 | 1.74264e-10 | 2.32248e-10 | 3.25290e-10 | 4.09102e-10 |
| 1.00000e-05 | 1.30538e-10 | 1.74264e-10 | 2.32248e-10 | 3.25290e-10 | 4.09102e-10 |
| 1.00000e-06 | 1.30538e-10 | 1.74264e-10 | 2.32248e-10 | 3.25290e-10 | 4.09102e-10 |
| 1.00000e-07 | 1.30538e-10 | 1.74264e-10 | 2.32248e-10 | 3.25290e-10 | 4.09102e-10 |
| 1.00000e-08 | 1.30538e-10 | 1.74264e-10 | 2.32248e-10 | 3.25290e-10 | 4.09102e-10 |
| 1.00000e-09 | 1.30538e-10 | 1.74264e-10 | 2.32248e-10 | 3.25290e-10 | 4.09102e-10 |

| Pa\K        | 400.000     | 500.000     | 600.000     | 700.000     | 800.000     |
|-------------|-------------|-------------|-------------|-------------|-------------|
| 1.00000e+08 | 2.28413e-05 | 0.00212660  | 0.00710170  | 0.00888669  | 0.00959977  |
| 1.00000e+07 | 1.40155e-06 | 0.000112634 | 0.00199829  | 0.00551502  | 0.00708609  |
| 1.00000e+06 | 4.76867e-08 | 3.42115e-06 | 0.000197004 | 0.00136921  | 0.00237518  |
| 100000.     | 7.56159e-09 | 2.89211e-07 | 1.86350e-05 | 0.000165514 | 0.000369584 |
| 10000.0     | 5.14848e-09 | 7.66326e-08 | 2.16172e-06 | 1.76308e-05 | 4.81256e-05 |
| 1000.00     | 4.92600e-09 | 5.31007e-08 | 5.34282e-07 | 3.35535e-06 | 1.15260e-05 |
| 100.000     | 4.88977e-09 | 5.05566e-08 | 3.74192e-07 | 1.99503e-06 | 7.81925e-06 |

|             |             |             |             |             |             |
|-------------|-------------|-------------|-------------|-------------|-------------|
| 10.0000     | 4.88864e-09 | 5.03115e-08 | 3.58293e-07 | 1.86144e-06 | 7.45255e-06 |
| 1.00000     | 4.88896e-09 | 5.02876e-08 | 3.56705e-07 | 1.84816e-06 | 7.41613e-06 |
| 0.100000    | 4.88900e-09 | 5.02852e-08 | 3.56547e-07 | 1.84683e-06 | 7.41250e-06 |
| 0.0100000   | 4.88900e-09 | 5.02850e-08 | 3.56531e-07 | 1.84669e-06 | 7.41213e-06 |
| 0.00100000  | 4.88900e-09 | 5.02850e-08 | 3.56529e-07 | 1.84668e-06 | 7.41210e-06 |
| 0.000100000 | 4.88900e-09 | 5.02850e-08 | 3.56529e-07 | 1.84668e-06 | 7.41210e-06 |
| 1.00000e-05 | 4.88900e-09 | 5.02850e-08 | 3.56529e-07 | 1.84668e-06 | 7.41210e-06 |
| 1.00000e-06 | 4.88900e-09 | 5.02850e-08 | 3.56529e-07 | 1.84668e-06 | 7.41210e-06 |
| 1.00000e-07 | 4.88900e-09 | 5.02850e-08 | 3.56529e-07 | 1.84668e-06 | 7.41210e-06 |
| 1.00000e-08 | 4.88900e-09 | 5.02850e-08 | 3.56529e-07 | 1.84668e-06 | 7.41210e-06 |
| 1.00000e-09 | 4.88900e-09 | 5.02850e-08 | 3.56529e-07 | 1.84668e-06 | 7.41210e-06 |

| Pa\K        | 900.000     | 1000.00     | 1100.00     | 1200.00     | 1300.00     |
|-------------|-------------|-------------|-------------|-------------|-------------|
| 1.00000e+08 | 0.00970004  | 0.00943863  | 0.00901997  | 0.00855055  | 0.00808507  |
| 1.00000e+07 | 0.00707182  | 0.00653776  | 0.00590594  | 0.00531867  | 0.00485508  |
| 1.00000e+06 | 0.00252116  | 0.00231380  | 0.00208306  | 0.00196212  | 0.00201285  |
| 100000.     | 0.000616759 | 0.000832796 | 0.000958103 | 0.00108740  | 0.00131949  |
| 10000.0     | 0.000149099 | 0.000321898 | 0.000458709 | 0.000609829 | 0.000878902 |
| 1000.00     | 4.33733e-05 | 0.000115902 | 0.000216819 | 0.000389725 | 0.000703577 |
| 100.000     | 2.62561e-05 | 7.22322e-05 | 0.000166930 | 0.000350122 | 0.000676502 |
| 10.0000     | 2.44098e-05 | 6.73857e-05 | 0.000161549 | 0.000346057 | 0.000673853 |
| 1.00000     | 2.42301e-05 | 6.69285e-05 | 0.000161047 | 0.000345681 | 0.000673609 |
| 0.100000    | 2.42124e-05 | 6.68846e-05 | 0.000160998 | 0.000345645 | 0.000673586 |
| 0.0100000   | 2.42107e-05 | 6.68804e-05 | 0.000160994 | 0.000345642 | 0.000673584 |
| 0.00100000  | 2.42105e-05 | 6.68799e-05 | 0.000160994 | 0.000345641 | 0.000673584 |
| 0.000100000 | 2.42105e-05 | 6.68799e-05 | 0.000160994 | 0.000345641 | 0.000673584 |
| 1.00000e-05 | 2.42105e-05 | 6.68799e-05 | 0.000160994 | 0.000345641 | 0.000673584 |
| 1.00000e-06 | 2.42105e-05 | 6.68799e-05 | 0.000160994 | 0.000345641 | 0.000673584 |
| 1.00000e-07 | 2.42105e-05 | 6.68799e-05 | 0.000160994 | 0.000345641 | 0.000673584 |
| 1.00000e-08 | 2.42105e-05 | 6.68799e-05 | 0.000160994 | 0.000345641 | 0.000673584 |
| 1.00000e-09 | 2.42105e-05 | 6.68799e-05 | 0.000160994 | 0.000345641 | 0.000673584 |

| Pa\K        | 1400.00    | 1500.00    | 1750.00    | 2000.00   | 2250.00   |
|-------------|------------|------------|------------|-----------|-----------|
| 1.00000e+08 | 0.00765786 | 0.00729514 | 0.106167   | 0.0902339 | 0.0783728 |
| 1.00000e+07 | 0.00457717 | 0.00453485 | 0.0433244  | 0.0367519 | 0.0361228 |
| 1.00000e+06 | 0.00228669 | 0.00282507 | 0.0127611  | 0.0163451 | 0.0231438 |
| 100000.     | 0.00173833 | 0.00240752 | 0.00728258 | 0.0128598 | 0.0210916 |
| 10000.0     | 0.00135310 | 0.00209175 | 0.00593417 | 0.0121540 | 0.0207560 |
| 1000.00     | 0.00122464 | 0.00200351 | 0.00569037 | 0.0120562 | 0.0207168 |
| 100.000     | 0.00120738 | 0.00199300 | 0.00566304 | 0.0120461 | 0.0207130 |
| 10.0000     | 0.00120575 | 0.00199204 | 0.00566034 | 0.0120451 | 0.0207126 |
| 1.00000     | 0.00120561 | 0.00199195 | 0.00566008 | 0.0120450 | 0.0207126 |
| 0.100000    | 0.00120559 | 0.00199195 | 0.00566005 | 0.0120450 | 0.0207126 |
| 0.0100000   | 0.00120559 | 0.00199195 | 0.00566005 | 0.0120450 | 0.0207126 |
| 0.00100000  | 0.00120559 | 0.00199195 | 0.00566005 | 0.0120450 | 0.0207126 |
| 0.000100000 | 0.00120559 | 0.00199195 | 0.00566005 | 0.0120450 | 0.0207126 |
| 1.00000e-05 | 0.00120559 | 0.00199195 | 0.00566005 | 0.0120450 | 0.0207126 |
| 1.00000e-06 | 0.00120559 | 0.00199195 | 0.00566005 | 0.0120450 | 0.0207126 |
| 1.00000e-07 | 0.00120559 | 0.00199195 | 0.00566005 | 0.0120450 | 0.0207126 |
| 1.00000e-08 | 0.00120559 | 0.00199195 | 0.00566005 | 0.0120450 | 0.0207126 |
| 1.00000e-09 | 0.00120559 | 0.00199195 | 0.00566005 | 0.0120450 | 0.0207126 |

PhCH2CCH+H

=====

| Pa\K        | 20.0000     | 30.0000     | 40.0000     | 50.0000     | 60.0000     |
|-------------|-------------|-------------|-------------|-------------|-------------|
| 1.00000e+08 | 2.66884e-26 | 3.93255e-25 | 1.81972e-24 | 5.39851e-24 | 1.26818e-23 |
| 1.00000e+07 | 1.27561e-22 | 1.38163e-21 | 5.23873e-21 | 1.34831e-20 | 2.84197e-20 |
| 1.00000e+06 | 2.08407e-19 | 1.76082e-18 | 5.95638e-18 | 1.42483e-17 | 2.84210e-17 |
| 100000.     | 1.74213e-16 | 1.17593e-15 | 3.38536e-15 | 7.10599e-15 | 1.26784e-14 |
| 10000.0     | 5.29275e-14 | 2.36381e-13 | 5.40871e-13 | 9.69446e-13 | 1.53203e-12 |
| 1000.00     | 4.38661e-12 | 1.30520e-11 | 2.33173e-11 | 3.49396e-11 | 4.80125e-11 |
| 100.000     | 9.06961e-11 | 1.90018e-10 | 2.88762e-10 | 3.91177e-10 | 4.99534e-10 |
| 10.0000     | 7.59108e-10 | 1.26073e-09 | 1.66695e-09 | 2.05027e-09 | 2.43813e-09 |
| 1.00000     | 3.09417e-09 | 4.71690e-09 | 6.15165e-09 | 7.52551e-09 | 8.88046e-09 |
| 0.100000    | 1.05501e-08 | 1.32786e-08 | 1.47782e-08 | 1.59723e-08 | 1.70803e-08 |
| 0.0100000   | 1.56682e-08 | 1.62757e-08 | 1.68986e-08 | 1.76333e-08 | 1.84625e-08 |
| 0.00100000  | 1.62906e-08 | 1.65870e-08 | 1.71120e-08 | 1.77990e-08 | 1.86000e-08 |
| 0.000100000 | 1.63526e-08 | 1.66180e-08 | 1.71333e-08 | 1.78155e-08 | 1.86137e-08 |
| 1.00000e-05 | 1.63588e-08 | 1.66211e-08 | 1.71354e-08 | 1.78172e-08 | 1.86151e-08 |
| 1.00000e-06 | 1.63594e-08 | 1.66214e-08 | 1.71356e-08 | 1.78173e-08 | 1.86153e-08 |
| 1.00000e-07 | 1.63595e-08 | 1.66215e-08 | 1.71356e-08 | 1.78174e-08 | 1.86153e-08 |
| 1.00000e-08 | 1.63595e-08 | 1.66215e-08 | 1.71356e-08 | 1.78174e-08 | 1.86153e-08 |
| 1.00000e-09 | 1.63595e-08 | 1.66215e-08 | 1.71356e-08 | 1.78174e-08 | 1.86153e-08 |

| Pa\K | 70.0000 | 80.0000 | 90.0000 | 100.000 | 110.000 |
|------|---------|---------|---------|---------|---------|
|------|---------|---------|---------|---------|---------|

|             |             |             |             |             |             |
|-------------|-------------|-------------|-------------|-------------|-------------|
| 1.00000e+08 | 2.58670e-23 | 4.81018e-23 | 8.39595e-23 | 1.40186e-22 | 2.26899e-22 |
| 1.00000e+07 | 5.31552e-20 | 9.20013e-20 | 1.51060e-19 | 2.39115e-19 | 3.69040e-19 |
| 1.00000e+06 | 5.07811e-17 | 8.44103e-17 | 1.33509e-16 | 2.03897e-16 | 3.03762e-16 |
| 100000.     | 2.05308e-14 | 3.12229e-14 | 4.54943e-14 | 6.43302e-14 | 8.90576e-14 |
| 10000.0     | 2.24496e-12 | 3.13175e-12 | 4.22406e-12 | 5.56357e-12 | 7.20498e-12 |
| 1000.00     | 6.27595e-11 | 7.94978e-11 | 9.86319e-11 | 1.20669e-10 | 1.46247e-10 |
| 100.000     | 6.15871e-10 | 7.42384e-10 | 8.81528e-10 | 1.03615e-09 | 1.20968e-09 |
| 10.0000     | 2.84637e-09 | 3.28727e-09 | 3.77211e-09 | 4.31266e-09 | 4.92220e-09 |
| 1.00000     | 1.02444e-08 | 1.16413e-08 | 1.30931e-08 | 1.46212e-08 | 1.62485e-08 |
| 0.100000    | 1.81859e-08 | 1.93333e-08 | 2.05520e-08 | 2.18658e-08 | 2.32978e-08 |
| 0.0100000   | 1.93820e-08 | 2.03971e-08 | 2.15173e-08 | 2.27554e-08 | 2.41275e-08 |
| 0.00100000  | 1.95010e-08 | 2.05029e-08 | 2.16133e-08 | 2.28438e-08 | 2.42101e-08 |
| 0.000100000 | 1.95128e-08 | 2.05135e-08 | 2.16229e-08 | 2.28527e-08 | 2.42183e-08 |
| 1.00000e-05 | 1.95140e-08 | 2.05145e-08 | 2.16238e-08 | 2.28535e-08 | 2.42192e-08 |
| 1.00000e-06 | 1.95142e-08 | 2.05146e-08 | 2.16239e-08 | 2.28536e-08 | 2.42192e-08 |
| 1.00000e-07 | 1.95142e-08 | 2.05146e-08 | 2.16239e-08 | 2.28536e-08 | 2.42192e-08 |
| 1.00000e-08 | 1.95142e-08 | 2.05146e-08 | 2.16239e-08 | 2.28536e-08 | 2.42192e-08 |
| 1.00000e-09 | 1.95142e-08 | 2.05146e-08 | 2.16239e-08 | 2.28536e-08 | 2.42192e-08 |

| Pa\K        | 120.000     | 130.000     | 140.000     | 150.000     | 160.000     |
|-------------|-------------|-------------|-------------|-------------|-------------|
| 1.00000e+08 | 3.59552e-22 | 5.62187e-22 | 8.72926e-22 | 1.35340e-21 | 2.10520e-21 |
| 1.00000e+07 | 5.60039e-19 | 8.41289e-19 | 1.25792e-18 | 1.88097e-18 | 2.82438e-18 |
| 1.00000e+06 | 4.44809e-16 | 6.44010e-16 | 9.26296e-16 | 1.32874e-15 | 1.90701e-15 |
| 100000.     | 1.21483e-13 | 1.64094e-13 | 2.20341e-13 | 2.95056e-13 | 3.95039e-13 |
| 10000.0     | 9.22024e-12 | 1.17044e-11 | 1.47832e-11 | 1.86239e-11 | 2.34493e-11 |
| 1000.00     | 1.76182e-10 | 2.11518e-10 | 2.53600e-10 | 3.04170e-10 | 3.65483e-10 |
| 100.000     | 1.40630e-09 | 1.63126e-09 | 1.89112e-09 | 2.19413e-09 | 2.55073e-09 |
| 10.0000     | 5.61653e-09 | 6.41487e-09 | 7.34090e-09 | 8.42389e-09 | 9.69991e-09 |
| 1.00000     | 1.79998e-08 | 1.99040e-08 | 2.19940e-08 | 2.43085e-08 | 2.68927e-08 |
| 0.100000    | 2.48726e-08 | 2.66179e-08 | 2.85662e-08 | 3.07551e-08 | 3.32292e-08 |
| 0.0100000   | 2.56542e-08 | 2.73605e-08 | 2.92766e-08 | 3.14389e-08 | 3.38911e-08 |
| 0.00100000  | 2.57320e-08 | 2.74344e-08 | 2.93473e-08 | 3.15070e-08 | 3.39570e-08 |
| 0.000100000 | 2.57398e-08 | 2.74418e-08 | 2.93544e-08 | 3.15138e-08 | 3.39636e-08 |
| 1.00000e-05 | 2.57406e-08 | 2.74425e-08 | 2.93551e-08 | 3.15145e-08 | 3.39642e-08 |
| 1.00000e-06 | 2.57406e-08 | 2.74426e-08 | 2.93552e-08 | 3.15146e-08 | 3.39643e-08 |
| 1.00000e-07 | 2.57407e-08 | 2.74426e-08 | 2.93552e-08 | 3.15146e-08 | 3.39643e-08 |
| 1.00000e-08 | 2.57407e-08 | 2.74426e-08 | 2.93552e-08 | 3.15146e-08 | 3.39643e-08 |
| 1.00000e-09 | 2.57407e-08 | 2.74426e-08 | 2.93552e-08 | 3.15146e-08 | 3.39643e-08 |

| Pa\K        | 170.000     | 180.000     | 190.000     | 200.000     | 210.000     |
|-------------|-------------|-------------|-------------|-------------|-------------|
| 1.00000e+08 | 3.29948e-21 | 5.23101e-21 | 8.42064e-21 | 1.38151e-20 | 2.31931e-20 |
| 1.00000e+07 | 4.27420e-18 | 6.54036e-18 | 1.01501e-17 | 1.60216e-17 | 2.57949e-17 |
| 1.00000e+06 | 2.74564e-15 | 3.97403e-15 | 5.79207e-15 | 8.51101e-15 | 1.26193e-14 |
| 100000.     | 2.29922e-13 | 7.13399e-13 | 9.65027e-13 | 1.31283e-12 | 1.79703e-12 |
| 10000.0     | 5.95561e-11 | 3.73412e-11 | 4.73356e-11 | 6.02515e-11 | 7.70451e-11 |
| 1000.00     | 4.40461e-10 | 5.32902e-10 | 6.47739e-10 | 7.91392e-10 | 9.72213e-10 |
| 100.000     | 2.97412e-09 | 3.48099e-09 | 4.09256e-09 | 4.83575e-09 | 5.74492e-09 |
| 10.0000     | 1.12135e-08 | 1.30190e-08 | 1.51831e-08 | 1.77864e-08 | 2.09266e-08 |
| 1.00000     | 2.97994e-08 | 3.30905e-08 | 3.68383e-08 | 4.11278e-08 | 4.60583e-08 |
| 0.100000    | 3.60405e-08 | 3.92503e-08 | 4.29303e-08 | 4.71648e-08 | 5.20524e-08 |
| 0.0100000   | 3.66842e-08 | 3.98790e-08 | 4.35468e-08 | 4.77716e-08 | 5.26517e-08 |
| 0.00100000  | 3.67483e-08 | 3.99416e-08 | 4.36082e-08 | 4.78321e-08 | 5.27115e-08 |
| 0.000100000 | 3.67547e-08 | 3.99479e-08 | 4.36144e-08 | 4.78382e-08 | 5.27175e-08 |
| 1.00000e-05 | 3.67553e-08 | 3.99485e-08 | 4.36150e-08 | 4.78388e-08 | 5.27181e-08 |
| 1.00000e-06 | 3.67554e-08 | 3.99486e-08 | 4.36151e-08 | 4.78388e-08 | 5.27181e-08 |
| 1.00000e-07 | 3.67554e-08 | 3.99486e-08 | 4.36151e-08 | 4.78388e-08 | 5.27181e-08 |
| 1.00000e-08 | 3.67554e-08 | 3.99486e-08 | 4.36151e-08 | 4.78388e-08 | 5.27181e-08 |
| 1.00000e-09 | 3.67554e-08 | 3.99486e-08 | 4.36151e-08 | 4.78388e-08 | 5.27181e-08 |

| Pa\K        | 220.000     | 230.000     | 240.000     | 250.000     | 260.000     |
|-------------|-------------|-------------|-------------|-------------|-------------|
| 1.00000e+08 | 4.00224e-20 | 7.13457e-20 | 1.32034e-19 | 2.54424e-19 | 5.09564e-19 |
| 1.00000e+07 | 4.24849e-17 | 7.18019e-17 | 1.24878e-16 | 2.23893e-16 | 4.13396e-16 |
| 1.00000e+06 | 1.88896e-14 | 2.85523e-14 | 4.35795e-14 | 6.71499e-14 | 1.04400e-13 |
| 100000.     | 2.47560e-12 | 3.43200e-12 | 4.78664e-12 | 6.71307e-12 | 9.46098e-12 |
| 10000.0     | 9.90029e-11 | 1.27856e-10 | 1.65939e-10 | 2.16398e-10 | 2.83469e-10 |
| 1000.00     | 1.20109e-09 | 1.49216e-09 | 1.86389e-09 | 2.34022e-09 | 2.95226e-09 |
| 100.000     | 6.86384e-09 | 8.24838e-09 | 9.96984e-09 | 1.21191e-08 | 1.48117e-08 |
| 10.0000     | 2.47207e-08 | 2.93084e-08 | 3.48557e-08 | 4.15585e-08 | 4.96467e-08 |
| 1.00000     | 5.17460e-08 | 5.83274e-08 | 6.59619e-08 | 7.48362e-08 | 8.51681e-08 |
| 0.100000    | 5.77091e-08 | 6.42705e-08 | 7.18957e-08 | 8.07704e-08 | 9.11123e-08 |
| 0.0100000   | 5.83028e-08 | 6.48602e-08 | 7.24828e-08 | 8.13565e-08 | 9.16987e-08 |
| 0.00100000  | 5.83619e-08 | 6.49190e-08 | 7.25414e-08 | 8.14150e-08 | 9.17572e-08 |
| 0.000100000 | 5.83678e-08 | 6.49249e-08 | 7.25473e-08 | 8.14208e-08 | 9.17630e-08 |
| 1.00000e-05 | 5.83684e-08 | 6.49255e-08 | 7.25479e-08 | 8.14214e-08 | 9.17636e-08 |
| 1.00000e-06 | 5.83685e-08 | 6.49255e-08 | 7.25479e-08 | 8.14215e-08 | 9.17637e-08 |
| 1.00000e-07 | 5.83685e-08 | 6.49255e-08 | 7.25479e-08 | 8.14215e-08 | 9.17637e-08 |
| 1.00000e-08 | 5.83685e-08 | 6.49255e-08 | 7.25479e-08 | 8.14215e-08 | 9.17637e-08 |

1.00000e-09 | 5.83685e-08 6.49255e-08 7.25479e-08 8.14215e-08 9.17637e-08

Pa\K | 270.000 280.000 290.000 300.000 310.000

-----  
1.00000e+08 | 1.05137e-18 2.20062e-18 4.58668e-18 3.49346e-13 1.84041e-17  
1.00000e+07 | 7.81861e-16 1.49942e-15 2.87661e-15 4.64222e-12 1.00311e-14  
1.00000e+06 | 1.63617e-13 2.58085e-13 4.08771e-13 1.63794e-11 1.02411e-12  
100000. | 1.33884e-11 1.90055e-11 2.70335e-11 2.49038e-10 5.47151e-11  
10000.0 | 3.72855e-10 4.92190e-10 6.51645e-10 3.02101e-09 1.14849e-09  
1000.00 | 3.74026e-09 4.75607e-09 6.06598e-09 1.66267e-08 9.92384e-09  
100.000 | 1.81941e-08 2.24504e-08 2.78107e-08 5.08456e-08 4.30317e-08  
10.0000 | 5.93890e-08 7.10971e-08 8.51307e-08 1.21131e-07 1.21853e-07  
1.00000 | 9.72124e-08 1.11265e-07 1.27666e-07 1.57206e-07 1.69117e-07  
0.100000 | 1.03175e-07 1.17254e-07 1.33690e-07 1.61945e-07 1.75228e-07  
0.0100000 | 1.03762e-07 1.17844e-07 1.34283e-07 1.62417e-07 1.75830e-07  
0.00100000 | 1.03821e-07 1.17902e-07 1.34342e-07 1.62464e-07 1.75890e-07  
0.000100000 | 1.03827e-07 1.17908e-07 1.34348e-07 1.62469e-07 1.75896e-07  
1.00000e-05 | 1.03828e-07 1.17909e-07 1.34349e-07 1.62469e-07 1.75897e-07  
1.00000e-06 | 1.03828e-07 1.17909e-07 1.34349e-07 1.62469e-07 1.75897e-07  
1.00000e-07 | 1.03828e-07 1.17909e-07 1.34349e-07 1.62469e-07 1.75897e-07  
1.00000e-08 | 1.03828e-07 1.17909e-07 1.34349e-07 1.62469e-07 1.75897e-07  
1.00000e-09 | 1.03828e-07 1.17909e-07 1.34349e-07 1.62469e-07 1.75897e-07

Pa\K | 400.000 500.000 600.000 700.000 800.000

-----  
1.00000e+08 | 1.65367e-07 7.70679e-05 0.000493801 0.00109140 0.00104497  
1.00000e+07 | 3.24254e-08 2.29893e-05 0.000904614 0.00377486 0.00501239  
1.00000e+06 | 6.54820e-09 3.30606e-06 0.000277547 0.00225626 0.00516340  
100000. | 1.43986e-08 1.65755e-06 7.51781e-05 0.000667747 0.00224626  
10000.0 | 6.87845e-08 1.59838e-06 2.28505e-05 0.000152016 0.000624202  
1000.00 | 1.83690e-07 1.70562e-06 1.08248e-05 4.70074e-05 0.000167058  
100.000 | 4.11074e-07 2.49674e-06 1.06631e-05 3.50163e-05 9.62600e-05  
10.0000 | 6.36413e-07 2.89410e-06 1.08921e-05 3.38684e-05 8.86402e-05  
1.00000 | 6.87162e-07 2.94803e-06 1.09173e-05 3.37516e-05 8.78778e-05  
0.100000 | 6.92462e-07 2.95333e-06 1.09197e-05 3.37398e-05 8.78016e-05  
0.0100000 | 6.92990e-07 2.95386e-06 1.09199e-05 3.37386e-05 8.77940e-05  
0.00100000 | 6.93042e-07 2.95392e-06 1.09199e-05 3.37385e-05 8.77933e-05  
0.000100000 | 6.93047e-07 2.95392e-06 1.09199e-05 3.37385e-05 8.77932e-05  
1.00000e-05 | 6.93048e-07 2.95392e-06 1.09199e-05 3.37385e-05 8.77932e-05  
1.00000e-06 | 6.93048e-07 2.95392e-06 1.09199e-05 3.37385e-05 8.77932e-05  
1.00000e-07 | 6.93048e-07 2.95392e-06 1.09199e-05 3.37385e-05 8.77932e-05  
1.00000e-08 | 6.93048e-07 2.95392e-06 1.09199e-05 3.37385e-05 8.77932e-05  
1.00000e-09 | 6.93048e-07 2.95392e-06 1.09199e-05 3.37385e-05 8.77932e-05

Pa\K | 900.000 1000.00 1100.00 1200.00 1300.00

-----  
1.00000e+08 | 0.000556114 0.000330822 0.000252272 0.000210011 0.000170738  
1.00000e+07 | 0.00379222 0.00274491 0.00230319 0.00210518 0.00197837  
1.00000e+06 | 0.00673878 0.00704562 0.00688220 0.00662522 0.00635030  
100000. | 0.00463195 0.00635128 0.00683585 0.00668829 0.00633662  
10000.0 | 0.00182492 0.00314878 0.00359169 0.00351927 0.00342188  
1000.00 | 0.000506226 0.000972949 0.00126643 0.00153057 0.00192374  
100.000 | 0.000230690 0.000451948 0.000747347 0.00115001 0.00168080  
10.0000 | 0.000199871 0.000393401 0.000691084 0.00111100 0.00165729  
1.00000 | 0.000196888 0.000387916 0.000685876 0.00110743 0.00165516  
0.100000 | 0.000196596 0.000387392 0.000685386 0.00110709 0.00165497  
0.0100000 | 0.000196566 0.000387341 0.000685339 0.00110706 0.00165495  
0.00100000 | 0.000196563 0.000387336 0.000685334 0.00110706 0.00165495  
0.000100000 | 0.000196563 0.000387336 0.000685334 0.00110706 0.00165495  
1.00000e-05 | 0.000196563 0.000387336 0.000685333 0.00110706 0.00165495  
1.00000e-06 | 0.000196563 0.000387336 0.000685333 0.00110706 0.00165495  
1.00000e-07 | 0.000196563 0.000387336 0.000685333 0.00110706 0.00165495  
1.00000e-08 | 0.000196563 0.000387336 0.000685333 0.00110706 0.00165495  
1.00000e-09 | 0.000196563 0.000387336 0.000685333 0.00110706 0.00165495

Pa\K | 1400.00 1500.00 1750.00 2000.00 2250.00

-----  
1.00000e+08 | 0.000137062 0.000117439 0.00847443 0.00834178 0.00805333  
1.00000e+07 | 0.00186871 0.00178129 0.0161927 0.0147710 0.0129713  
1.00000e+06 | 0.00607722 0.00583087 0.0168111 0.0137842 0.0112884  
100000. | 0.00598986 0.00575081 0.0106836 0.00894730 0.00822118  
10000.0 | 0.00350479 0.00379834 0.00597765 0.00670792 0.00728221  
1000.00 | 0.00247215 0.00313835 0.00492091 0.00634627 0.00716146  
100.000 | 0.00232872 0.00305900 0.00479915 0.00630895 0.00714984  
10.0000 | 0.00231560 0.00305218 0.00478725 0.00630538 0.00714876  
1.00000 | 0.00231444 0.00305160 0.00478610 0.00630505 0.00714867  
0.100000 | 0.00231433 0.00305155 0.00478599 0.00630500 0.00714867  
0.0100000 | 0.00231433 0.00305154 0.00478598 0.00630500 0.00714867  
0.00100000 | 0.00231433 0.00305154 0.00478598 0.00630500 0.00714867  
0.000100000 | 0.00231433 0.00305154 0.00478598 0.00630500 0.00714867

|             |            |            |            |            |            |
|-------------|------------|------------|------------|------------|------------|
| 1.00000e-05 | 0.00231433 | 0.00305154 | 0.00478598 | 0.00630500 | 0.00714867 |
| 1.00000e-06 | 0.00231433 | 0.00305154 | 0.00478598 | 0.00630500 | 0.00714867 |
| 1.00000e-07 | 0.00231433 | 0.00305154 | 0.00478598 | 0.00630500 | 0.00714867 |
| 1.00000e-08 | 0.00231433 | 0.00305154 | 0.00478598 | 0.00630500 | 0.00714867 |
| 1.00000e-09 | 0.00231433 | 0.00305154 | 0.00478598 | 0.00630500 | 0.00714867 |

Ph+MeAc

=====

| Pa\K        | 20.0000     | 30.0000     | 40.0000     | 50.0000     | 60.0000     |
|-------------|-------------|-------------|-------------|-------------|-------------|
| 1.00000e+08 | 1.30680e-24 | 1.87723e-23 | 8.29744e-23 | 2.34658e-22 | 5.26040e-22 |
| 1.00000e+07 | 4.56715e-21 | 3.98922e-20 | 1.33259e-19 | 3.14655e-19 | 6.21987e-19 |
| 1.00000e+06 | 3.99957e-18 | 3.06883e-17 | 9.98569e-17 | 2.33170e-16 | 4.56624e-16 |
| 100000.     | 2.79228e-15 | 1.85688e-14 | 5.30349e-14 | 1.10619e-13 | 1.96260e-13 |
| 10000.0     | 8.50286e-13 | 3.96617e-12 | 9.47181e-12 | 1.76797e-11 | 2.90402e-11 |
| 1000.00     | 1.04247e-10 | 4.28515e-10 | 9.67102e-10 | 1.73818e-09 | 2.77076e-09 |
| 100.000     | 9.04190e-09 | 3.24458e-08 | 6.54948e-08 | 1.06188e-07 | 1.53343e-07 |
| 10.0000     | 3.40157e-07 | 6.66235e-07 | 8.79833e-07 | 1.03459e-06 | 1.15784e-06 |
| 1.00000     | 1.25541e-06 | 1.38375e-06 | 1.45766e-06 | 1.52337e-06 | 1.58760e-06 |
| 0.100000    | 1.50381e-06 | 1.54813e-06 | 1.58837e-06 | 1.63353e-06 | 1.68314e-06 |
| 0.0100000   | 1.55160e-06 | 1.56969e-06 | 1.60176e-06 | 1.64324e-06 | 1.69080e-06 |
| 0.00100000  | 1.55499e-06 | 1.57133e-06 | 1.60287e-06 | 1.64408e-06 | 1.69150e-06 |
| 0.000100000 | 1.55531e-06 | 1.57149e-06 | 1.60298e-06 | 1.64417e-06 | 1.69157e-06 |
| 1.00000e-05 | 1.55534e-06 | 1.57151e-06 | 1.60299e-06 | 1.64418e-06 | 1.69157e-06 |
| 1.00000e-06 | 1.55535e-06 | 1.57151e-06 | 1.60299e-06 | 1.64418e-06 | 1.69157e-06 |
| 1.00000e-07 | 1.55535e-06 | 1.57151e-06 | 1.60299e-06 | 1.64418e-06 | 1.69157e-06 |
| 1.00000e-08 | 1.55535e-06 | 1.57151e-06 | 1.60299e-06 | 1.64418e-06 | 1.69157e-06 |
| 1.00000e-09 | 1.55535e-06 | 1.57151e-06 | 1.60299e-06 | 1.64418e-06 | 1.69157e-06 |

| Pa\K        | 70.0000     | 80.0000     | 90.0000     | 100.000     | 110.000     |
|-------------|-------------|-------------|-------------|-------------|-------------|
| 1.00000e+08 | 1.02548e-21 | 1.82515e-21 | 3.05240e-21 | 4.88684e-21 | 7.58692e-21 |
| 1.00000e+07 | 1.10543e-18 | 1.83332e-18 | 2.90031e-18 | 4.43973e-18 | 6.64247e-18 |
| 1.00000e+06 | 8.03126e-16 | 1.31581e-15 | 2.05241e-15 | 3.09144e-15 | 4.54145e-15 |
| 100000.     | 3.16149e-13 | 4.78356e-13 | 6.93497e-13 | 9.75658e-13 | 1.34371e-12 |
| 10000.0     | 4.41631e-11 | 6.38611e-11 | 8.92048e-11 | 1.21605e-10 | 1.62933e-10 |
| 1000.00     | 4.10521e-09 | 5.79525e-09 | 7.91037e-09 | 1.05395e-08 | 1.37967e-08 |
| 100.000     | 2.06286e-07 | 2.64694e-07 | 3.28489e-07 | 3.97776e-07 | 4.72820e-07 |
| 10.0000     | 1.26365e-06 | 1.35995e-06 | 1.45153e-06 | 1.54159e-06 | 1.63241e-06 |
| 1.00000     | 1.65260e-06 | 1.71967e-06 | 1.78973e-06 | 1.86356e-06 | 1.94193e-06 |
| 0.100000    | 1.73691e-06 | 1.79495e-06 | 1.85753e-06 | 1.92506e-06 | 1.99802e-06 |
| 0.0100000   | 1.74329e-06 | 1.80044e-06 | 1.86238e-06 | 1.92941e-06 | 2.00199e-06 |
| 0.00100000  | 1.74388e-06 | 1.80096e-06 | 1.86284e-06 | 1.92983e-06 | 2.00237e-06 |
| 0.000100000 | 1.74394e-06 | 1.80101e-06 | 1.86289e-06 | 1.92987e-06 | 2.00241e-06 |
| 1.00000e-05 | 1.74394e-06 | 1.80101e-06 | 1.86289e-06 | 1.92987e-06 | 2.00241e-06 |
| 1.00000e-06 | 1.74394e-06 | 1.80101e-06 | 1.86289e-06 | 1.92987e-06 | 2.00241e-06 |
| 1.00000e-07 | 1.74394e-06 | 1.80101e-06 | 1.86289e-06 | 1.92987e-06 | 2.00241e-06 |
| 1.00000e-08 | 1.74394e-06 | 1.80101e-06 | 1.86289e-06 | 1.92987e-06 | 2.00241e-06 |
| 1.00000e-09 | 1.74394e-06 | 1.80101e-06 | 1.86289e-06 | 1.92987e-06 | 2.00241e-06 |

| Pa\K        | 120.000     | 130.000     | 140.000     | 150.000     | 160.000     |
|-------------|-------------|-------------|-------------|-------------|-------------|
| 1.00000e+08 | 1.15316e-20 | 1.72872e-20 | 2.57153e-20 | 3.81512e-20 | 5.67029e-20 |
| 1.00000e+07 | 9.78665e-18 | 1.42844e-17 | 2.07571e-17 | 3.01574e-17 | 4.39710e-17 |
| 1.00000e+06 | 6.55472e-15 | 9.34797e-15 | 1.32335e-14 | 1.86667e-14 | 2.63185e-14 |
| 100000.     | 1.82325e-12 | 2.44934e-12 | 3.27047e-12 | 4.35434e-12 | 5.79618e-12 |
| 10000.0     | 2.15696e-10 | 2.83280e-10 | 3.70298e-10 | 4.83073e-10 | 6.30321e-10 |
| 1000.00     | 1.78284e-08 | 2.28230e-08 | 2.90234e-08 | 3.67417e-08 | 4.63778e-08 |
| 100.000     | 5.54040e-07 | 6.42014e-07 | 7.37473e-07 | 8.41313e-07 | 9.54588e-07 |
| 10.0000     | 1.72582e-06 | 1.82342e-06 | 1.92670e-06 | 2.03713e-06 | 2.15625e-06 |
| 1.00000     | 2.02565e-06 | 2.11561e-06 | 2.21281e-06 | 2.31837e-06 | 2.43352e-06 |
| 0.100000    | 2.07707e-06 | 2.16295e-06 | 2.25656e-06 | 2.35894e-06 | 2.47129e-06 |
| 0.0100000   | 2.08071e-06 | 2.16633e-06 | 2.25972e-06 | 2.36192e-06 | 2.47410e-06 |
| 0.00100000  | 2.08106e-06 | 2.16666e-06 | 2.26003e-06 | 2.36221e-06 | 2.47437e-06 |
| 0.000100000 | 2.08110e-06 | 2.16669e-06 | 2.26006e-06 | 2.36224e-06 | 2.47440e-06 |
| 1.00000e-05 | 2.08110e-06 | 2.16669e-06 | 2.26007e-06 | 2.36224e-06 | 2.47440e-06 |
| 1.00000e-06 | 2.08110e-06 | 2.16669e-06 | 2.26007e-06 | 2.36224e-06 | 2.47440e-06 |
| 1.00000e-07 | 2.08110e-06 | 2.16669e-06 | 2.26007e-06 | 2.36224e-06 | 2.47440e-06 |
| 1.00000e-08 | 2.08110e-06 | 2.16669e-06 | 2.26007e-06 | 2.36224e-06 | 2.47440e-06 |
| 1.00000e-09 | 2.08110e-06 | 2.16669e-06 | 2.26007e-06 | 2.36224e-06 | 2.47440e-06 |

| Pa\K        | 170.000     | 180.000     | 190.000     | 200.000     | 210.000     |
|-------------|-------------|-------------|-------------|-------------|-------------|
| 1.00000e+08 | 8.47637e-20 | 1.27912e-19 | 1.95536e-19 | 3.03853e-19 | 4.81754e-19 |
| 1.00000e+07 | 6.45568e-17 | 9.57294e-17 | 1.43784e-16 | 2.19341e-16 | 3.40756e-16 |
| 1.00000e+06 | 3.71871e-14 | 5.27714e-14 | 7.53420e-14 | 1.08369e-13 | 1.57201e-13 |
| 100000.     | 7.73089e-12 | 1.03508e-11 | 1.39321e-11 | 1.88734e-11 | 2.57532e-11 |
| 10000.0     | 8.24108e-10 | 1.08120e-09 | 1.42497e-09 | 1.88801e-09 | 2.51591e-09 |
| 1000.00     | 5.84410e-08 | 7.35763e-08 | 9.25931e-08 | 1.16500e-07 | 1.46540e-07 |
| 100.000     | 1.07853e-06 | 1.21451e-06 | 1.36412e-06 | 1.52910e-06 | 1.71140e-06 |

|             |             |             |             |             |             |
|-------------|-------------|-------------|-------------|-------------|-------------|
| 10.0000     | 2.28562e-06 | 2.42697e-06 | 2.58212e-06 | 2.75303e-06 | 2.94184e-06 |
| 1.00000     | 2.55965e-06 | 2.69827e-06 | 2.85106e-06 | 3.01986e-06 | 3.20669e-06 |
| 0.100000    | 2.59492e-06 | 2.73130e-06 | 2.88210e-06 | 3.04911e-06 | 3.23433e-06 |
| 0.0100000   | 2.59759e-06 | 2.73384e-06 | 2.88453e-06 | 3.05144e-06 | 3.23657e-06 |
| 0.00100000  | 2.59785e-06 | 2.73409e-06 | 2.88477e-06 | 3.05167e-06 | 3.23679e-06 |
| 0.000100000 | 2.59787e-06 | 2.73412e-06 | 2.88479e-06 | 3.05169e-06 | 3.23681e-06 |
| 1.00000e-05 | 2.59788e-06 | 2.73412e-06 | 2.88479e-06 | 3.05169e-06 | 3.23682e-06 |
| 1.00000e-06 | 2.59788e-06 | 2.73412e-06 | 2.88479e-06 | 3.05169e-06 | 3.23682e-06 |
| 1.00000e-07 | 2.59788e-06 | 2.73412e-06 | 2.88479e-06 | 3.05169e-06 | 3.23682e-06 |
| 1.00000e-08 | 2.59788e-06 | 2.73412e-06 | 2.88479e-06 | 3.05169e-06 | 3.23682e-06 |
| 1.00000e-09 | 2.59788e-06 | 2.73412e-06 | 2.88479e-06 | 3.05169e-06 | 3.23682e-06 |

| Pa\K        | 220.000     | 230.000     | 240.000     | 250.000     | 260.000     |
|-------------|-------------|-------------|-------------|-------------|-------------|
| 1.00000e+08 | 7.82518e-19 | 1.30830e-18 | 2.26277e-18 | 4.06552e-18 | 7.59593e-18 |
| 1.00000e+07 | 5.40635e-16 | 8.78590e-16 | 1.46679e-15 | 2.52130e-15 | 4.46355e-15 |
| 1.00000e+06 | 2.30154e-13 | 3.40261e-13 | 5.08125e-13 | 7.66545e-13 | 1.16802e-12 |
| 100000.     | 3.54162e-11 | 4.91004e-11 | 6.86284e-11 | 9.66916e-11 | 1.37271e-10 |
| 10000.0     | 3.37234e-09 | 4.54617e-09 | 6.16110e-09 | 8.38866e-09 | 1.14654e-08 |
| 1000.00     | 1.84236e-07 | 2.31428e-07 | 2.90324e-07 | 3.63543e-07 | 4.54165e-07 |
| 100.000     | 1.91319e-06 | 2.13683e-06 | 2.38496e-06 | 2.66046e-06 | 2.96652e-06 |
| 10.0000     | 3.15088e-06 | 3.38265e-06 | 3.63992e-06 | 3.92567e-06 | 4.24313e-06 |
| 1.00000     | 3.41378e-06 | 3.64354e-06 | 3.89864e-06 | 4.18199e-06 | 4.49678e-06 |
| 0.100000    | 3.43996e-06 | 3.66843e-06 | 3.92235e-06 | 4.20465e-06 | 4.51848e-06 |
| 0.0100000   | 3.44212e-06 | 3.67051e-06 | 3.92437e-06 | 4.20660e-06 | 4.52038e-06 |
| 0.00100000  | 3.44234e-06 | 3.67072e-06 | 3.92457e-06 | 4.20680e-06 | 4.52057e-06 |
| 0.000100000 | 3.44236e-06 | 3.67074e-06 | 3.92459e-06 | 4.20682e-06 | 4.52059e-06 |
| 1.00000e-05 | 3.44236e-06 | 3.67074e-06 | 3.92459e-06 | 4.20682e-06 | 4.52059e-06 |
| 1.00000e-06 | 3.44236e-06 | 3.67074e-06 | 3.92459e-06 | 4.20682e-06 | 4.52059e-06 |
| 1.00000e-07 | 3.44236e-06 | 3.67074e-06 | 3.92459e-06 | 4.20682e-06 | 4.52059e-06 |
| 1.00000e-08 | 3.44236e-06 | 3.67074e-06 | 3.92459e-06 | 4.20682e-06 | 4.52059e-06 |
| 1.00000e-09 | 3.44236e-06 | 3.67074e-06 | 3.92459e-06 | 4.20682e-06 | 4.52059e-06 |

| Pa\K        | 270.000     | 280.000     | 290.000     | 300.000     | 310.000     |
|-------------|-------------|-------------|-------------|-------------|-------------|
| 1.00000e+08 | 1.46878e-17 | 2.90540e-17 | 5.78357e-17 | 1.33352e-16 | 2.18308e-16 |
| 1.00000e+07 | 8.11121e-15 | 1.50113e-14 | 2.79642e-14 | 2.30387e-14 | 9.38749e-14 |
| 1.00000e+06 | 1.79678e-12 | 2.78747e-12 | 4.35327e-12 | 1.42736e-11 | 1.07050e-11 |
| 100000.     | 1.96254e-10 | 2.82326e-10 | 4.08223e-10 | 4.50311e-09 | 8.61371e-09 |
| 10000.0     | 1.57152e-08 | 2.15775e-08 | 2.96414e-08 | 1.59512e-07 | 5.57170e-07 |
| 1000.00     | 5.65776e-07 | 7.02502e-07 | 8.69047e-07 | 1.88127e-06 | 1.31316e-06 |
| 100.000     | 3.30664e-06 | 3.68466e-06 | 4.10478e-06 | 4.87715e-06 | 5.08908e-06 |
| 10.0000     | 4.59583e-06 | 4.98761e-06 | 5.42261e-06 | 5.81351e-06 | 6.43939e-06 |
| 1.00000     | 4.84650e-06 | 5.23494e-06 | 5.66622e-06 | 5.98344e-06 | 6.67444e-06 |
| 0.100000    | 4.86733e-06 | 5.25498e-06 | 5.68554e-06 | 5.99692e-06 | 6.69251e-06 |
| 0.0100000   | 4.86918e-06 | 5.25678e-06 | 5.68730e-06 | 5.99813e-06 | 6.69418e-06 |
| 0.00100000  | 4.86936e-06 | 5.25695e-06 | 5.68747e-06 | 5.99825e-06 | 6.69434e-06 |
| 0.000100000 | 4.86938e-06 | 5.25697e-06 | 5.68749e-06 | 5.99826e-06 | 6.69436e-06 |
| 1.00000e-05 | 4.86938e-06 | 5.25697e-06 | 5.68749e-06 | 5.99826e-06 | 6.69436e-06 |
| 1.00000e-06 | 4.86938e-06 | 5.25697e-06 | 5.68749e-06 | 5.99826e-06 | 6.69436e-06 |
| 1.00000e-07 | 4.86938e-06 | 5.25697e-06 | 5.68749e-06 | 5.99826e-06 | 6.69436e-06 |
| 1.00000e-08 | 4.86938e-06 | 5.25697e-06 | 5.68749e-06 | 5.99826e-06 | 6.69436e-06 |
| 1.00000e-09 | 4.86938e-06 | 5.25697e-06 | 5.68749e-06 | 5.99826e-06 | 6.69436e-06 |

| Pa\K        | 400.000     | 500.000     | 600.000     | 700.000     | 800.000     |
|-------------|-------------|-------------|-------------|-------------|-------------|
| 1.00000e+08 | 3.21960e-07 | 0.000110645 | 0.000637682 | 0.00125690  | 0.00111422  |
| 1.00000e+07 | 1.08024e-07 | 4.06168e-05 | 0.00120948  | 0.00461358  | 0.00590173  |
| 1.00000e+06 | 5.01331e-08 | 1.04250e-05 | 0.000482720 | 0.00318007  | 0.00650348  |
| 100000.     | 2.60679e-07 | 1.13420e-05 | 0.000224942 | 0.00135084  | 0.00354377  |
| 10000.0     | 2.53571e-06 | 2.44155e-05 | 0.000139300 | 0.000503768 | 0.00137468  |
| 1000.00     | 9.30794e-06 | 3.33345e-05 | 9.47424e-05 | 0.000233332 | 0.000536116 |
| 100.000     | 1.34578e-05 | 3.57162e-05 | 8.66270e-05 | 0.000189941 | 0.000380176 |
| 10.0000     | 1.43909e-05 | 3.62609e-05 | 8.58424e-05 | 0.000185285 | 0.000363024 |
| 1.00000     | 1.45082e-05 | 3.63065e-05 | 8.57524e-05 | 0.000184815 | 0.000361325 |
| 0.100000    | 1.45170e-05 | 3.63098e-05 | 8.57431e-05 | 0.000184768 | 0.000361157 |
| 0.0100000   | 1.45178e-05 | 3.63101e-05 | 8.57421e-05 | 0.000184763 | 0.000361140 |
| 0.00100000  | 1.45179e-05 | 3.63101e-05 | 8.57420e-05 | 0.000184762 | 0.000361138 |
| 0.000100000 | 1.45179e-05 | 3.63101e-05 | 8.57420e-05 | 0.000184762 | 0.000361138 |
| 1.00000e-05 | 1.45179e-05 | 3.63101e-05 | 8.57420e-05 | 0.000184762 | 0.000361137 |
| 1.00000e-06 | 1.45179e-05 | 3.63101e-05 | 8.57420e-05 | 0.000184762 | 0.000361137 |
| 1.00000e-07 | 1.45179e-05 | 3.63101e-05 | 8.57420e-05 | 0.000184762 | 0.000361137 |
| 1.00000e-08 | 1.45179e-05 | 3.63101e-05 | 8.57420e-05 | 0.000184762 | 0.000361137 |
| 1.00000e-09 | 1.45179e-05 | 3.63101e-05 | 8.57420e-05 | 0.000184762 | 0.000361137 |

| Pa\K        | 900.000     | 1000.00     | 1100.00     | 1200.00     | 1300.00     |
|-------------|-------------|-------------|-------------|-------------|-------------|
| 1.00000e+08 | 0.000585854 | 0.000352819 | 0.000280696 | 0.000256781 | 0.000248034 |
| 1.00000e+07 | 0.00442965  | 0.00320599  | 0.00270289  | 0.00249828  | 0.00239754  |
| 1.00000e+06 | 0.00811631  | 0.00835346  | 0.00810222  | 0.00778555  | 0.00748115  |



|             |             |            |            |            |            |
|-------------|-------------|------------|------------|------------|------------|
| 100000.     | 0.00626546  | 0.00805960 | 0.00849301 | 0.00828640 | 0.00790023 |
| 10000.0     | 0.00301010  | 0.00455727 | 0.00504947 | 0.00501172 | 0.00497482 |
| 1000.00     | 0.00112960  | 0.00182686 | 0.00230905 | 0.00276444 | 0.00334333 |
| 100.000     | 0.000697199 | 0.00113884 | 0.00167538 | 0.00232243 | 0.00307347 |
| 10.0000     | 0.000648560 | 0.00106149 | 0.00160688 | 0.00227748 | 0.00304778 |
| 1.00000     | 0.000643911 | 0.00105432 | 0.00160062 | 0.00227342 | 0.00304550 |
| 0.100000    | 0.000643456 | 0.00105365 | 0.00160004 | 0.00227305 | 0.00304529 |
| 0.0100000   | 0.000643411 | 0.00105358 | 0.00159998 | 0.00227301 | 0.00304528 |
| 0.00100000  | 0.000643407 | 0.00105357 | 0.00159997 | 0.00227301 | 0.00304527 |
| 0.000100000 | 0.000643407 | 0.00105357 | 0.00159997 | 0.00227301 | 0.00304527 |
| 1.00000e-05 | 0.000643406 | 0.00105357 | 0.00159997 | 0.00227301 | 0.00304527 |
| 1.00000e-06 | 0.000643406 | 0.00105357 | 0.00159997 | 0.00227301 | 0.00304527 |
| 1.00000e-07 | 0.000643406 | 0.00105357 | 0.00159997 | 0.00227301 | 0.00304527 |
| 1.00000e-08 | 0.000643406 | 0.00105357 | 0.00159997 | 0.00227301 | 0.00304527 |
| 1.00000e-09 | 0.000643406 | 0.00105357 | 0.00159997 | 0.00227301 | 0.00304527 |

| Pa\K        | 1400.00     | 1500.00     | 1750.00    | 2000.00    | 2250.00    |
|-------------|-------------|-------------|------------|------------|------------|
| 1.00000e+08 | 0.000244618 | 0.000243474 | 0.00688056 | 0.00677698 | 0.00654784 |
| 1.00000e+07 | 0.00232898  | 0.00227249  | 0.0136750  | 0.0125416  | 0.0111236  |
| 1.00000e+06 | 0.00719742  | 0.00694162  | 0.0150749  | 0.0127887  | 0.0108483  |
| 100000.     | 0.00753948  | 0.00729084  | 0.0111710  | 0.00991628 | 0.00916152 |
| 10000.0     | 0.00512453  | 0.00546116  | 0.00783870 | 0.00844107 | 0.00859063 |
| 1000.00     | 0.00404160  | 0.00479700  | 0.00705671 | 0.00819413 | 0.00851595 |
| 100.000     | 0.00388984  | 0.00471785  | 0.00696607 | 0.00816879 | 0.00850894 |
| 10.0000     | 0.00387638  | 0.00471143  | 0.00695723 | 0.00816640 | 0.00850830 |
| 1.00000     | 0.00387523  | 0.00471091  | 0.00695638 | 0.00816619 | 0.00850826 |
| 0.100000    | 0.00387512  | 0.00471086  | 0.00695632 | 0.00816619 | 0.00850826 |
| 0.0100000   | 0.00387511  | 0.00471086  | 0.00695632 | 0.00816619 | 0.00850826 |
| 0.00100000  | 0.00387511  | 0.00471086  | 0.00695632 | 0.00816619 | 0.00850826 |
| 0.000100000 | 0.00387511  | 0.00471086  | 0.00695632 | 0.00816619 | 0.00850826 |
| 1.00000e-05 | 0.00387511  | 0.00471086  | 0.00695632 | 0.00816619 | 0.00850826 |
| 1.00000e-06 | 0.00387511  | 0.00471086  | 0.00695632 | 0.00816619 | 0.00850826 |
| 1.00000e-07 | 0.00387511  | 0.00471086  | 0.00695632 | 0.00816619 | 0.00850826 |
| 1.00000e-08 | 0.00387511  | 0.00471086  | 0.00695632 | 0.00816619 | 0.00850826 |
| 1.00000e-09 | 0.00387511  | 0.00471086  | 0.00695632 | 0.00816619 | 0.00850826 |

C2H2+PhCH2

=====

| Pa\K        | 20.0000     | 30.0000     | 40.0000     | 50.0000     | 60.0000     |
|-------------|-------------|-------------|-------------|-------------|-------------|
| 1.00000e+08 | 6.21793e-22 | 4.61195e-21 | 1.41368e-20 | 3.09797e-20 | 5.69661e-20 |
| 1.00000e+07 | 2.92727e-19 | 1.51492e-18 | 3.78964e-18 | 7.33599e-18 | 1.25160e-17 |
| 1.00000e+06 | 6.40658e-17 | 5.76848e-16 | 2.38385e-15 | 6.72504e-15 | 1.52237e-14 |
| 100000.     | 1.57970e-13 | 1.53356e-12 | 5.16011e-12 | 1.18046e-11 | 2.21419e-11 |
| 10000.0     | 1.19929e-10 | 5.24630e-10 | 1.06184e-09 | 1.67534e-09 | 2.35316e-09 |
| 1000.00     | 5.40221e-09 | 1.23564e-08 | 1.94718e-08 | 2.68590e-08 | 3.46113e-08 |
| 100.000     | 6.43591e-08 | 1.26227e-07 | 1.83497e-07 | 2.38451e-07 | 2.92200e-07 |
| 10.0000     | 4.46012e-07 | 6.64106e-07 | 8.01422e-07 | 9.08622e-07 | 1.00281e-06 |
| 1.00000     | 1.13954e-06 | 1.42049e-06 | 1.64255e-06 | 1.83951e-06 | 2.02071e-06 |
| 0.100000    | 2.22612e-06 | 2.49895e-06 | 2.62263e-06 | 2.71810e-06 | 2.80762e-06 |
| 0.0100000   | 2.63469e-06 | 2.67292e-06 | 2.72500e-06 | 2.78966e-06 | 2.86277e-06 |
| 0.00100000  | 2.65833e-06 | 2.68422e-06 | 2.73258e-06 | 2.79542e-06 | 2.86746e-06 |
| 0.000100000 | 2.66054e-06 | 2.68532e-06 | 2.73332e-06 | 2.79599e-06 | 2.86792e-06 |
| 1.00000e-05 | 2.66076e-06 | 2.68543e-06 | 2.73340e-06 | 2.79605e-06 | 2.86797e-06 |
| 1.00000e-06 | 2.66078e-06 | 2.68544e-06 | 2.73340e-06 | 2.79605e-06 | 2.86797e-06 |
| 1.00000e-07 | 2.66078e-06 | 2.68544e-06 | 2.73340e-06 | 2.79605e-06 | 2.86797e-06 |
| 1.00000e-08 | 2.66078e-06 | 2.68544e-06 | 2.73340e-06 | 2.79605e-06 | 2.86797e-06 |
| 1.00000e-09 | 2.66078e-06 | 2.68544e-06 | 2.73340e-06 | 2.79605e-06 | 2.86797e-06 |

| Pa\K        | 70.0000     | 80.0000     | 90.0000     | 100.000     | 110.000     |
|-------------|-------------|-------------|-------------|-------------|-------------|
| 1.00000e+08 | 9.42031e-20 | 1.45292e-19 | 2.13546e-19 | 3.03259e-19 | 4.20090e-19 |
| 1.00000e+07 | 1.98723e-17 | 3.01920e-17 | 4.46037e-17 | 6.47276e-17 | 9.29107e-17 |
| 1.00000e+06 | 2.99705e-14 | 5.36786e-14 | 8.99091e-14 | 1.43395e-13 | 2.20508e-13 |
| 100000.     | 3.68249e-11 | 5.65358e-11 | 8.20284e-11 | 1.14174e-10 | 1.54013e-10 |
| 10000.0     | 3.09646e-09 | 3.91180e-09 | 4.80886e-09 | 5.80004e-09 | 6.90066e-09 |
| 1000.00     | 4.28212e-08 | 5.15890e-08 | 6.10243e-08 | 7.12500e-08 | 8.24082e-08 |
| 100.000     | 3.45545e-07 | 3.99169e-07 | 4.53688e-07 | 5.09685e-07 | 5.67748e-07 |
| 10.0000     | 1.09164e-06 | 1.17929e-06 | 1.26844e-06 | 1.36101e-06 | 1.45864e-06 |
| 1.00000     | 2.19139e-06 | 2.35533e-06 | 2.51548e-06 | 2.67423e-06 | 2.83370e-06 |
| 0.100000    | 2.89770e-06 | 2.99115e-06 | 3.08955e-06 | 3.19402e-06 | 3.30563e-06 |
| 0.0100000   | 2.94282e-06 | 3.02951e-06 | 3.12303e-06 | 3.22383e-06 | 3.33254e-06 |
| 0.00100000  | 2.94679e-06 | 3.03297e-06 | 3.12610e-06 | 3.22659e-06 | 3.33506e-06 |
| 0.000100000 | 2.94718e-06 | 3.03331e-06 | 3.12641e-06 | 3.22687e-06 | 3.33531e-06 |
| 1.00000e-05 | 2.94722e-06 | 3.03334e-06 | 3.12644e-06 | 3.22690e-06 | 3.33534e-06 |
| 1.00000e-06 | 2.94722e-06 | 3.03335e-06 | 3.12644e-06 | 3.22690e-06 | 3.33534e-06 |
| 1.00000e-07 | 2.94722e-06 | 3.03335e-06 | 3.12644e-06 | 3.22690e-06 | 3.33534e-06 |
| 1.00000e-08 | 2.94722e-06 | 3.03335e-06 | 3.12644e-06 | 3.22690e-06 | 3.33534e-06 |

1.00000e-09 | 2.94722e-06 3.03335e-06 3.12644e-06 3.22690e-06 3.33534e-06

Pa\K | 120.000 130.000 140.000 150.000 160.000

-----  
1.00000e+08 | 5.71599e-19 7.68011e-19 1.02331e-18 1.35683e-18 1.79550e-18  
1.00000e+07 | 1.32598e-16 1.88924e-16 2.69661e-16 3.86774e-16 5.58993e-16  
1.00000e+06 | 3.29944e-13 4.83707e-13 6.98549e-13 9.98053e-13 1.41565e-12  
100000. | 2.02820e-10 2.62180e-10 3.34081e-10 4.21031e-10 5.26195e-10  
10000.0 | 8.12963e-09 9.51029e-09 1.10714e-08 1.28484e-08 1.48848e-08  
1000.00 | 9.46669e-08 1.08226e-07 1.23328e-07 1.40261e-07 1.59374e-07  
100.000 | 6.28502e-07 6.92627e-07 7.60889e-07 8.34149e-07 9.13386e-07  
10.0000 | 1.56287e-06 1.67525e-06 1.79748e-06 1.93139e-06 2.07903e-06  
1.00000 | 2.99587e-06 3.16267e-06 3.33605e-06 3.51802e-06 3.71070e-06  
0.100000 | 3.42543e-06 3.55462e-06 3.69454e-06 3.84665e-06 4.01262e-06  
0.0100000 | 3.45000e-06 3.57726e-06 3.71554e-06 3.86625e-06 4.03100e-06  
0.00100000 | 3.45232e-06 3.57941e-06 3.71755e-06 3.86813e-06 4.03278e-06  
0.000100000 | 3.45255e-06 3.57963e-06 3.71775e-06 3.86832e-06 4.03295e-06  
1.00000e-05 | 3.45258e-06 3.57965e-06 3.71777e-06 3.86834e-06 4.03297e-06  
1.00000e-06 | 3.45258e-06 3.57965e-06 3.71777e-06 3.86834e-06 4.03297e-06  
1.00000e-07 | 3.45258e-06 3.57965e-06 3.71777e-06 3.86834e-06 4.03297e-06  
1.00000e-08 | 3.45258e-06 3.57965e-06 3.71777e-06 3.86834e-06 4.03297e-06  
1.00000e-09 | 3.45258e-06 3.57965e-06 3.71777e-06 3.86834e-06 4.03297e-06

Pa\K | 170.000 180.000 190.000 200.000 210.000

-----  
1.00000e+08 | 2.37727e-18 3.15610e-18 4.20961e-18 5.65097e-18 7.64803e-18  
1.00000e+07 | 8.16164e-16 1.20671e-15 1.81074e-15 2.76364e-15 4.29933e-15  
1.00000e+06 | 1.99899e-12 2.81637e-12 3.96590e-12 5.58906e-12 7.89027e-12  
100000. | 6.53569e-10 8.08201e-10 9.96458e-10 1.22637e-09 1.50809e-09  
10000.0 | 1.72345e-08 1.99632e-08 2.31520e-08 2.69001e-08 3.13297e-08  
1000.00 | 1.81085e-07 2.05892e-07 2.34393e-07 2.67297e-07 3.05447e-07  
100.000 | 9.99717e-07 1.09441e-06 1.19895e-06 1.31497e-06 1.44442e-06  
10.0000 | 2.24264e-06 2.42477e-06 2.62818e-06 2.85590e-06 3.11124e-06  
1.00000 | 3.91629e-06 4.13716e-06 4.37580e-06 4.63490e-06 4.91731e-06  
0.100000 | 4.19431e-06 4.39371e-06 4.61305e-06 4.85477e-06 5.12151e-06  
0.0100000 | 4.21161e-06 4.41006e-06 4.62855e-06 4.86950e-06 5.13553e-06  
0.00100000 | 4.21328e-06 4.41165e-06 4.63006e-06 4.87094e-06 5.13690e-06  
0.000100000 | 4.21345e-06 4.41181e-06 4.63021e-06 4.87108e-06 5.13704e-06  
1.00000e-05 | 4.21347e-06 4.41182e-06 4.63023e-06 4.87109e-06 5.13705e-06  
1.00000e-06 | 4.21347e-06 4.41182e-06 4.63023e-06 4.87109e-06 5.13705e-06  
1.00000e-07 | 4.21347e-06 4.41182e-06 4.63023e-06 4.87110e-06 5.13705e-06  
1.00000e-08 | 4.21347e-06 4.41182e-06 4.63023e-06 4.87110e-06 5.13705e-06  
1.00000e-09 | 4.21347e-06 4.41182e-06 4.63023e-06 4.87110e-06 5.13705e-06

Pa\K | 220.000 230.000 240.000 250.000 260.000

-----  
1.00000e+08 | 1.04556e-17 1.44726e-17 2.03498e-17 2.92031e-17 4.30446e-17  
1.00000e+07 | 6.83251e-15 1.11179e-14 1.85659e-14 3.18696e-14 5.62293e-14  
1.00000e+06 | 1.11654e-11 1.58434e-11 2.25465e-11 3.21774e-11 4.60443e-11  
100000. | 1.85439e-09 2.28145e-09 2.80968e-09 3.46492e-09 4.27980e-09  
10000.0 | 3.65906e-08 4.28670e-08 5.03853e-08 5.94243e-08 7.03262e-08  
1000.00 | 3.49840e-07 4.01659e-07 4.62294e-07 5.33382e-07 6.16841e-07  
100.000 | 1.58950e-06 1.75276e-06 1.93713e-06 2.14601e-06 2.38331e-06  
10.0000 | 3.39777e-06 3.71930e-06 4.07990e-06 4.48387e-06 4.93575e-06  
1.00000 | 5.22610e-06 5.56461e-06 5.93637e-06 6.34524e-06 6.79535e-06  
0.100000 | 5.41616e-06 5.74184e-06 6.10199e-06 6.50030e-06 6.94079e-06  
0.0100000 | 5.42953e-06 5.75462e-06 6.11420e-06 6.51199e-06 6.95198e-06  
0.00100000 | 5.43084e-06 5.75587e-06 6.11540e-06 6.51313e-06 6.95309e-06  
0.000100000 | 5.43097e-06 5.75599e-06 6.11552e-06 6.51325e-06 6.95320e-06  
1.00000e-05 | 5.43098e-06 5.75601e-06 6.11553e-06 6.51326e-06 6.95321e-06  
1.00000e-06 | 5.43098e-06 5.75601e-06 6.11553e-06 6.51326e-06 6.95321e-06  
1.00000e-07 | 5.43098e-06 5.75601e-06 6.11553e-06 6.51326e-06 6.95321e-06  
1.00000e-08 | 5.43098e-06 5.75601e-06 6.11553e-06 6.51326e-06 6.95321e-06  
1.00000e-09 | 5.43098e-06 5.75601e-06 6.11553e-06 6.51326e-06 6.95321e-06

Pa\K | 270.000 280.000 290.000 300.000 310.000

-----  
1.00000e+08 | 6.56413e-17 1.04127e-16 1.71775e-16 2.84311e-16 5.04645e-16  
1.00000e+07 | 1.01636e-13 1.86814e-13 3.45355e-13 1.35136e-10 1.14136e-12  
1.00000e+06 | 6.60383e-11 9.48750e-11 1.36413e-10 1.59460e-09 2.81083e-10  
100000. | 5.29563e-09 6.56454e-09 8.15212e-09 2.87436e-08 1.26301e-08  
10000.0 | 8.35119e-08 9.94977e-08 1.18915e-07 3.12126e-07 1.71245e-07  
1000.00 | 7.14911e-07 8.30193e-07 9.65697e-07 1.82541e-06 1.31143e-06  
100.000 | 2.65350e-06 2.96174e-06 3.31384e-06 4.56972e-06 4.17611e-06  
10.0000 | 5.44028e-06 6.00244e-06 6.62740e-06 8.28585e-06 8.08620e-06  
1.00000 | 7.29118e-06 7.83753e-06 8.43955e-06 9.84766e-06 9.83154e-06  
0.100000 | 7.42782e-06 7.96612e-06 8.56076e-06 9.95310e-06 9.93963e-06  
0.0100000 | 7.43856e-06 7.97642e-06 8.57064e-06 9.96171e-06 9.94873e-06  
0.00100000 | 7.43962e-06 7.97744e-06 8.57162e-06 9.96256e-06 9.94963e-06  
0.000100000 | 7.43972e-06 7.97754e-06 8.57171e-06 9.96264e-06 9.94972e-06

|             |             |             |             |             |             |
|-------------|-------------|-------------|-------------|-------------|-------------|
| 1.00000e-05 | 7.43973e-06 | 7.97755e-06 | 8.57172e-06 | 9.96265e-06 | 9.94973e-06 |
| 1.00000e-06 | 7.43973e-06 | 7.97755e-06 | 8.57172e-06 | 9.96265e-06 | 9.94973e-06 |
| 1.00000e-07 | 7.43973e-06 | 7.97755e-06 | 8.57172e-06 | 9.96265e-06 | 9.94973e-06 |
| 1.00000e-08 | 7.43973e-06 | 7.97755e-06 | 8.57172e-06 | 9.96265e-06 | 9.94973e-06 |
| 1.00000e-09 | 7.43973e-06 | 7.97755e-06 | 8.57172e-06 | 9.96265e-06 | 9.94973e-06 |

| Pa\K        | 400.000     | 500.000     | 600.000     | 700.000     | 800.000     |
|-------------|-------------|-------------|-------------|-------------|-------------|
| 1.00000e+08 | 3.72283e-07 | 0.000113009 | 0.000655400 | 0.00137845  | 0.00129183  |
| 1.00000e+07 | 1.63806e-07 | 4.06321e-05 | 0.00117022  | 0.00448637  | 0.00579094  |
| 1.00000e+06 | 9.21227e-08 | 9.97493e-06 | 0.000452572 | 0.00302820  | 0.00626268  |
| 100000.     | 3.88442e-07 | 1.01422e-05 | 0.000202946 | 0.00126079  | 0.00336046  |
| 10000.0     | 2.45820e-06 | 2.03988e-05 | 0.000126230 | 0.000485968 | 0.00132552  |
| 1000.00     | 7.83588e-06 | 3.09040e-05 | 9.97359e-05 | 0.000254937 | 0.000563442 |
| 100.000     | 1.48945e-05 | 4.45909e-05 | 0.000109061 | 0.000226931 | 0.000424575 |
| 10.0000     | 2.11379e-05 | 5.08092e-05 | 0.000111873 | 0.000223846 | 0.000408875 |
| 1.00000     | 2.21810e-05 | 5.13038e-05 | 0.000111945 | 0.000223417 | 0.000407276 |
| 0.100000    | 2.22409e-05 | 5.13332e-05 | 0.000111945 | 0.000223372 | 0.000407117 |
| 0.0100000   | 2.22462e-05 | 5.13360e-05 | 0.000111945 | 0.000223368 | 0.000407100 |
| 0.00100000  | 2.22468e-05 | 5.13362e-05 | 0.000111945 | 0.000223367 | 0.000407098 |
| 0.000100000 | 2.22468e-05 | 5.13363e-05 | 0.000111945 | 0.000223367 | 0.000407098 |
| 1.00000e-05 | 2.22468e-05 | 5.13363e-05 | 0.000111945 | 0.000223367 | 0.000407098 |
| 1.00000e-06 | 2.22468e-05 | 5.13363e-05 | 0.000111945 | 0.000223367 | 0.000407098 |
| 1.00000e-07 | 2.22468e-05 | 5.13363e-05 | 0.000111945 | 0.000223367 | 0.000407098 |
| 1.00000e-08 | 2.22468e-05 | 5.13363e-05 | 0.000111945 | 0.000223367 | 0.000407098 |
| 1.00000e-09 | 2.22468e-05 | 5.13363e-05 | 0.000111945 | 0.000223367 | 0.000407098 |

| Pa\K        | 900.000     | 1000.00     | 1100.00     | 1200.00     | 1300.00     |
|-------------|-------------|-------------|-------------|-------------|-------------|
| 1.00000e+08 | 0.000668029 | 0.000365860 | 0.000248260 | 0.000196481 | 0.000170569 |
| 1.00000e+07 | 0.00436151  | 0.00314965  | 0.00261982  | 0.00238160  | 0.00225876  |
| 1.00000e+06 | 0.00785519  | 0.00810019  | 0.00785716  | 0.00754156  | 0.00723922  |
| 100000.     | 0.00600813  | 0.00777223  | 0.00820678  | 0.00800790  | 0.00762758  |
| 10000.0     | 0.00288933  | 0.00438856  | 0.00486890  | 0.00482266  | 0.00476828  |
| 1000.00     | 0.00113559  | 0.00180102  | 0.00225001  | 0.00266266  | 0.00319194  |
| 100.000     | 0.000734047 | 0.00115077  | 0.00164590  | 0.00223887  | 0.00293176  |
| 10.0000     | 0.000688680 | 0.00107762  | 0.00158059  | 0.00219576  | 0.00290696  |
| 1.00000     | 0.000684341 | 0.00107086  | 0.00157463  | 0.00219188  | 0.00290476  |
| 0.100000    | 0.000683918 | 0.00107021  | 0.00157407  | 0.00219152  | 0.00290456  |
| 0.0100000   | 0.000683876 | 0.00107015  | 0.00157402  | 0.00219148  | 0.00290455  |
| 0.00100000  | 0.000683872 | 0.00107014  | 0.00157401  | 0.00219148  | 0.00290454  |
| 0.000100000 | 0.000683871 | 0.00107014  | 0.00157401  | 0.00219148  | 0.00290454  |
| 1.00000e-05 | 0.000683871 | 0.00107014  | 0.00157401  | 0.00219148  | 0.00290454  |
| 1.00000e-06 | 0.000683871 | 0.00107014  | 0.00157401  | 0.00219148  | 0.00290454  |
| 1.00000e-07 | 0.000683871 | 0.00107014  | 0.00157401  | 0.00219148  | 0.00290454  |
| 1.00000e-08 | 0.000683871 | 0.00107014  | 0.00157401  | 0.00219148  | 0.00290454  |
| 1.00000e-09 | 0.000683871 | 0.00107014  | 0.00157401  | 0.00219148  | 0.00290454  |

| Pa\K        | 1400.00     | 1500.00     | 1750.00     | 2000.00    | 2250.00    |
|-------------|-------------|-------------|-------------|------------|------------|
| 1.00000e+08 | 0.000156569 | 0.000150198 | 0.000601000 | 0.00592820 | 0.00573395 |
| 1.00000e+07 | 0.00217851  | 0.00211811  | 0.0114372   | 0.0105169  | 0.00937300 |
| 1.00000e+06 | 0.00695971  | 0.00670950  | 0.0127872   | 0.0110006  | 0.00949312 |
| 100000.     | 0.00726893  | 0.00702022  | 0.00975734  | 0.00889049 | 0.00836085 |
| 10000.0     | 0.00489500  | 0.00521068  | 0.00704917  | 0.00773979 | 0.00794771 |
| 1000.00     | 0.00384312  | 0.00456233  | 0.00640743  | 0.00754489 | 0.00789323 |
| 100.000     | 0.00369581  | 0.00448485  | 0.00633285  | 0.00752490 | 0.00788823 |
| 10.0000     | 0.00368269  | 0.00447848  | 0.00632558  | 0.00752306 | 0.00788774 |
| 1.00000     | 0.00368156  | 0.00447797  | 0.00632486  | 0.00752285 | 0.00788774 |
| 0.100000    | 0.00368146  | 0.00447792  | 0.00632480  | 0.00752285 | 0.00788769 |
| 0.0100000   | 0.00368145  | 0.00447792  | 0.00632480  | 0.00752285 | 0.00788769 |
| 0.00100000  | 0.00368145  | 0.00447791  | 0.00632480  | 0.00752285 | 0.00788769 |
| 0.000100000 | 0.00368145  | 0.00447791  | 0.00632480  | 0.00752285 | 0.00788769 |
| 1.00000e-05 | 0.00368145  | 0.00447791  | 0.00632480  | 0.00752285 | 0.00788769 |
| 1.00000e-06 | 0.00368145  | 0.00447791  | 0.00632480  | 0.00752285 | 0.00788769 |
| 1.00000e-07 | 0.00368145  | 0.00447791  | 0.00632480  | 0.00752285 | 0.00788769 |
| 1.00000e-08 | 0.00368145  | 0.00447791  | 0.00632480  | 0.00752285 | 0.00788769 |
| 1.00000e-09 | 0.00368145  | 0.00447791  | 0.00632480  | 0.00752285 | 0.00788769 |

Ph+Allene

=====

| Pa\K        | 20.0000     | 30.0000     | 40.0000     | 50.0000     | 60.0000     |
|-------------|-------------|-------------|-------------|-------------|-------------|
| 1.00000e+08 | 1.80930e-25 | 2.74645e-24 | 1.27398e-23 | 3.76003e-23 | 8.75758e-23 |
| 1.00000e+07 | 9.08319e-22 | 9.77544e-21 | 3.67523e-20 | 9.36740e-20 | 1.95353e-19 |
| 1.00000e+06 | 1.46877e-18 | 1.23365e-17 | 4.13990e-17 | 9.80851e-17 | 1.93566e-16 |
| 100000.     | 1.21253e-15 | 8.09385e-15 | 2.30316e-14 | 4.77641e-14 | 8.41751e-14 |
| 10000.0     | 3.56595e-13 | 1.57092e-12 | 3.55255e-12 | 6.29220e-12 | 9.82257e-12 |
| 1000.00     | 2.83821e-11 | 8.24920e-11 | 1.44752e-10 | 2.13616e-10 | 2.89531e-10 |
| 100.000     | 5.51929e-10 | 1.14523e-09 | 1.72978e-09 | 2.32959e-09 | 2.95733e-09 |

|             |             |             |             |             |             |
|-------------|-------------|-------------|-------------|-------------|-------------|
| 10.0000     | 4.64813e-09 | 7.92370e-09 | 1.07143e-08 | 1.34234e-08 | 1.62051e-08 |
| 1.00000     | 2.26094e-08 | 3.69349e-08 | 4.94704e-08 | 6.11832e-08 | 7.24451e-08 |
| 0.100000    | 8.90355e-08 | 1.11575e-07 | 1.23077e-07 | 1.31846e-07 | 1.39790e-07 |
| 0.0100000   | 1.29816e-07 | 1.34110e-07 | 1.38511e-07 | 1.43685e-07 | 1.49492e-07 |
| 0.00100000  | 1.34165e-07 | 1.36262e-07 | 1.39977e-07 | 1.44817e-07 | 1.50427e-07 |
| 0.000100000 | 1.34591e-07 | 1.36475e-07 | 1.40123e-07 | 1.44930e-07 | 1.50520e-07 |
| 1.00000e-05 | 1.34634e-07 | 1.36496e-07 | 1.40137e-07 | 1.44941e-07 | 1.50529e-07 |
| 1.00000e-06 | 1.34638e-07 | 1.36498e-07 | 1.40139e-07 | 1.44942e-07 | 1.50530e-07 |
| 1.00000e-07 | 1.34639e-07 | 1.36499e-07 | 1.40139e-07 | 1.44942e-07 | 1.50530e-07 |
| 1.00000e-08 | 1.34639e-07 | 1.36499e-07 | 1.40139e-07 | 1.44942e-07 | 1.50530e-07 |
| 1.00000e-09 | 1.34639e-07 | 1.36499e-07 | 1.40139e-07 | 1.44942e-07 | 1.50530e-07 |

| Pa\K        | 70.0000     | 80.0000     | 90.0000     | 100.000     | 110.000     |
|-------------|-------------|-------------|-------------|-------------|-------------|
| 1.00000e+08 | 1.76744e-22 | 3.24703e-22 | 5.59153e-22 | 9.19852e-22 | 1.46484e-21 |
| 1.00000e+07 | 3.61196e-19 | 6.17438e-19 | 1.00028e-18 | 1.56055e-18 | 2.37087e-18 |
| 1.00000e+06 | 3.41843e-16 | 5.61117e-16 | 8.75559e-16 | 1.31781e-15 | 1.93267e-15 |
| 100000.     | 1.34591e-13 | 2.02033e-13 | 2.90406e-13 | 4.04845e-13 | 5.52133e-13 |
| 10000.0     | 1.42122e-11 | 1.95669e-11 | 2.60318e-11 | 3.37985e-11 | 4.31164e-11 |
| 1000.00     | 3.73590e-10 | 4.67308e-10 | 5.72570e-10 | 6.91681e-10 | 8.27493e-10 |
| 100.000     | 3.62405e-09 | 4.34132e-09 | 5.12186e-09 | 5.98014e-09 | 6.93334e-09 |
| 10.0000     | 1.91511e-08 | 2.23347e-08 | 2.58253e-08 | 2.96962e-08 | 3.40303e-08 |
| 1.00000     | 8.35023e-08 | 9.45550e-08 | 1.05776e-07 | 1.17323e-07 | 1.29353e-07 |
| 0.100000    | 1.47594e-07 | 1.55596e-07 | 1.64006e-07 | 1.72981e-07 | 1.82664e-07 |
| 0.0100000   | 1.55889e-07 | 1.62897e-07 | 1.70568e-07 | 1.78975e-07 | 1.88209e-07 |
| 0.00100000  | 1.56692e-07 | 1.63607e-07 | 1.71209e-07 | 1.79562e-07 | 1.88753e-07 |
| 0.000100000 | 1.56772e-07 | 1.63678e-07 | 1.71273e-07 | 1.79620e-07 | 1.88807e-07 |
| 1.00000e-05 | 1.56780e-07 | 1.63685e-07 | 1.71279e-07 | 1.79626e-07 | 1.88812e-07 |
| 1.00000e-06 | 1.56781e-07 | 1.63685e-07 | 1.71280e-07 | 1.79627e-07 | 1.88813e-07 |
| 1.00000e-07 | 1.56781e-07 | 1.63686e-07 | 1.71280e-07 | 1.79627e-07 | 1.88813e-07 |
| 1.00000e-08 | 1.56781e-07 | 1.63686e-07 | 1.71280e-07 | 1.79627e-07 | 1.88813e-07 |
| 1.00000e-09 | 1.56781e-07 | 1.63686e-07 | 1.71280e-07 | 1.79627e-07 | 1.88813e-07 |

| Pa\K        | 120.000     | 130.000     | 140.000     | 150.000     | 160.000     |
|-------------|-------------|-------------|-------------|-------------|-------------|
| 1.00000e+08 | 2.28033e-21 | 3.49671e-21 | 5.31471e-21 | 8.04911e-21 | 1.22026e-20 |
| 1.00000e+07 | 3.53677e-18 | 5.21435e-18 | 7.63835e-18 | 1.11678e-17 | 1.63607e-17 |
| 1.00000e+06 | 2.78251e-15 | 3.95540e-15 | 5.57727e-15 | 7.83008e-15 | 1.09793e-14 |
| 100000.     | 7.41319e-13 | 9.84592e-13 | 1.29849e-12 | 1.70560e-12 | 2.23694e-12 |
| 10000.0     | 5.43094e-11 | 6.77984e-11 | 8.41307e-11 | 1.04019e-10 | 1.28389e-10 |
| 1000.00     | 9.83574e-10 | 1.16442e-09 | 1.37572e-09 | 1.62472e-09 | 1.92059e-09 |
| 100.000     | 8.00234e-09 | 9.21291e-09 | 1.05972e-08 | 1.21954e-08 | 1.40581e-08 |
| 10.0000     | 3.89257e-08 | 4.45005e-08 | 5.08986e-08 | 5.82954e-08 | 6.69036e-08 |
| 1.00000     | 1.42031e-07 | 1.55535e-07 | 1.70065e-07 | 1.85845e-07 | 2.03132e-07 |
| 0.100000    | 1.93204e-07 | 2.04763e-07 | 2.17522e-07 | 2.31693e-07 | 2.47519e-07 |
| 0.0100000   | 1.98385e-07 | 2.09643e-07 | 2.22153e-07 | 2.36113e-07 | 2.51760e-07 |
| 0.00100000  | 1.98894e-07 | 2.10124e-07 | 2.22609e-07 | 2.36549e-07 | 2.52179e-07 |
| 0.000100000 | 1.98945e-07 | 2.10171e-07 | 2.22655e-07 | 2.36593e-07 | 2.52221e-07 |
| 1.00000e-05 | 1.98950e-07 | 2.10176e-07 | 2.22659e-07 | 2.36597e-07 | 2.52225e-07 |
| 1.00000e-06 | 1.98950e-07 | 2.10177e-07 | 2.22660e-07 | 2.36598e-07 | 2.52225e-07 |
| 1.00000e-07 | 1.98950e-07 | 2.10177e-07 | 2.22660e-07 | 2.36598e-07 | 2.52226e-07 |
| 1.00000e-08 | 1.98950e-07 | 2.10177e-07 | 2.22660e-07 | 2.36598e-07 | 2.52226e-07 |
| 1.00000e-09 | 1.98950e-07 | 2.10177e-07 | 2.22660e-07 | 2.36598e-07 | 2.52226e-07 |

| Pa\K        | 170.000     | 180.000     | 190.000     | 200.000     | 210.000     |
|-------------|-------------|-------------|-------------|-------------|-------------|
| 1.00000e+08 | 1.85942e-20 | 2.85859e-20 | 4.44971e-20 | 7.03820e-20 | 1.13546e-19 |
| 1.00000e+07 | 2.41000e-17 | 3.58075e-17 | 5.38176e-17 | 8.20459e-17 | 1.27216e-16 |
| 1.00000e+06 | 1.54159e-14 | 2.17201e-14 | 3.07596e-14 | 4.38417e-14 | 6.29507e-14 |
| 100000.     | 2.93526e-12 | 3.85975e-12 | 5.09254e-12 | 6.74795e-12 | 8.98537e-12 |
| 10000.0     | 1.58450e-10 | 1.95776e-10 | 2.42423e-10 | 3.01073e-10 | 3.75239e-10 |
| 1000.00     | 2.27504e-09 | 2.70298e-09 | 3.22343e-09 | 3.86067e-09 | 4.64573e-09 |
| 100.000     | 1.62488e-08 | 1.88477e-08 | 2.19563e-08 | 2.57026e-08 | 3.02496e-08 |
| 10.0000     | 7.69806e-08 | 8.88361e-08 | 1.02841e-07 | 1.19433e-07 | 1.39131e-07 |
| 1.00000     | 2.22215e-07 | 2.43427e-07 | 2.67147e-07 | 2.93809e-07 | 3.23909e-07 |
| 0.100000    | 2.65279e-07 | 2.85292e-07 | 3.07929e-07 | 3.33616e-07 | 3.62840e-07 |
| 0.0100000   | 2.69366e-07 | 2.89249e-07 | 3.11774e-07 | 3.37363e-07 | 3.66504e-07 |
| 0.00100000  | 2.69770e-07 | 2.89641e-07 | 3.12155e-07 | 3.37735e-07 | 3.66868e-07 |
| 0.000100000 | 2.69811e-07 | 2.89680e-07 | 3.12193e-07 | 3.37772e-07 | 3.66904e-07 |
| 1.00000e-05 | 2.69815e-07 | 2.89684e-07 | 3.12197e-07 | 3.37775e-07 | 3.66908e-07 |
| 1.00000e-06 | 2.69815e-07 | 2.89684e-07 | 3.12197e-07 | 3.37776e-07 | 3.66908e-07 |
| 1.00000e-07 | 2.69815e-07 | 2.89684e-07 | 3.12197e-07 | 3.37776e-07 | 3.66908e-07 |
| 1.00000e-08 | 2.69815e-07 | 2.89684e-07 | 3.12197e-07 | 3.37776e-07 | 3.66908e-07 |
| 1.00000e-09 | 2.69815e-07 | 2.89684e-07 | 3.12197e-07 | 3.37776e-07 | 3.66908e-07 |

| Pa\K        | 220.000     | 230.000     | 240.000     | 250.000     | 260.000     |
|-------------|-------------|-------------|-------------|-------------|-------------|
| 1.00000e+08 | 1.87613e-19 | 3.18997e-19 | 5.60905e-19 | 1.02393e-18 | 1.94156e-18 |
| 1.00000e+07 | 2.01179e-16 | 3.25426e-16 | 5.40017e-16 | 9.21362e-16 | 1.61684e-15 |
| 1.00000e+06 | 9.11171e-14 | 1.33003e-13 | 1.95823e-13 | 2.90801e-13 | 4.35461e-13 |

|             |             |             |             |             |             |
|-------------|-------------|-------------|-------------|-------------|-------------|
| 100000.     | 1.20275e-11 | 1.61852e-11 | 2.18939e-11 | 2.97615e-11 | 4.06366e-11 |
| 10000.0     | 4.69517e-10 | 5.89933e-10 | 7.44395e-10 | 9.43287e-10 | 1.20024e-09 |
| 1000.00     | 5.61827e-09 | 6.82913e-09 | 8.34339e-09 | 1.02444e-08 | 1.26392e-08 |
| 100.000     | 3.58035e-08 | 4.26263e-08 | 5.10502e-08 | 6.14957e-08 | 7.44933e-08 |
| 10.0000     | 1.62544e-07 | 1.90377e-07 | 2.23448e-07 | 2.62696e-07 | 3.09199e-07 |
| 1.00000     | 3.58016e-07 | 3.96783e-07 | 4.40953e-07 | 4.91386e-07 | 5.49057e-07 |
| 0.100000    | 3.96163e-07 | 4.34229e-07 | 4.77779e-07 | 5.27661e-07 | 5.84848e-07 |
| 0.0100000   | 3.99755e-07 | 4.37760e-07 | 4.81257e-07 | 5.31094e-07 | 5.88244e-07 |
| 0.00100000  | 4.00112e-07 | 4.38111e-07 | 4.81603e-07 | 5.31436e-07 | 5.88581e-07 |
| 0.000100000 | 4.00148e-07 | 4.38146e-07 | 4.81637e-07 | 5.31470e-07 | 5.88615e-07 |
| 1.00000e-05 | 4.00151e-07 | 4.38150e-07 | 4.81641e-07 | 5.31473e-07 | 5.88618e-07 |
| 1.00000e-06 | 4.00152e-07 | 4.38150e-07 | 4.81641e-07 | 5.31474e-07 | 5.88618e-07 |
| 1.00000e-07 | 4.00152e-07 | 4.38150e-07 | 4.81641e-07 | 5.31474e-07 | 5.88618e-07 |
| 1.00000e-08 | 4.00152e-07 | 4.38150e-07 | 4.81641e-07 | 5.31474e-07 | 5.88618e-07 |
| 1.00000e-09 | 4.00152e-07 | 4.38150e-07 | 4.81641e-07 | 5.31474e-07 | 5.88618e-07 |

| Pa\K        | 270.000     | 280.000     | 290.000     | 300.000     | 310.000     |
|-------------|-------------|-------------|-------------|-------------|-------------|
| 1.00000e+08 | 3.80289e-18 | 7.60038e-18 | 1.52413e-17 | 4.24013e-13 | 5.78897e-17 |
| 1.00000e+07 | 2.90905e-15 | 5.32556e-15 | 9.80678e-15 | 7.00385e-12 | 3.21178e-14 |
| 1.00000e+06 | 6.57158e-13 | 9.98389e-13 | 1.52439e-12 | 3.33664e-11 | 3.56842e-12 |
| 100000.     | 5.56999e-11 | 7.65864e-11 | 1.05543e-10 | 5.86559e-10 | 2.00907e-10 |
| 10000.0     | 1.53313e-09 | 1.96534e-09 | 2.52732e-09 | 7.59902e-09 | 4.20830e-09 |
| 1000.00     | 1.56644e-08 | 1.94945e-08 | 2.43508e-08 | 4.97739e-08 | 3.83204e-08 |
| 100.000     | 9.07092e-08 | 1.10974e-07 | 1.36314e-07 | 2.08747e-07 | 2.07453e-07 |
| 10.0000     | 3.64174e-07 | 4.29007e-07 | 5.05247e-07 | 5.93474e-07 | 6.98955e-07 |
| 1.00000     | 6.15087e-07 | 6.90749e-07 | 7.77487e-07 | 7.91877e-07 | 9.90749e-07 |
| 0.100000    | 6.50451e-07 | 7.25741e-07 | 8.12156e-07 | 8.16342e-07 | 1.02490e-06 |
| 0.0100000   | 6.53816e-07 | 7.29079e-07 | 8.15472e-07 | 8.18732e-07 | 1.02818e-06 |
| 0.00100000  | 6.54150e-07 | 7.29411e-07 | 8.15803e-07 | 8.18970e-07 | 1.02850e-06 |
| 0.000100000 | 6.54183e-07 | 7.29445e-07 | 8.15836e-07 | 8.18993e-07 | 1.02854e-06 |
| 1.00000e-05 | 6.54187e-07 | 7.29448e-07 | 8.15839e-07 | 8.18996e-07 | 1.02854e-06 |
| 1.00000e-06 | 6.54187e-07 | 7.29448e-07 | 8.15840e-07 | 8.18996e-07 | 1.02854e-06 |
| 1.00000e-07 | 6.54187e-07 | 7.29448e-07 | 8.15840e-07 | 8.18996e-07 | 1.02854e-06 |
| 1.00000e-08 | 6.54187e-07 | 7.29448e-07 | 8.15840e-07 | 8.18996e-07 | 1.02854e-06 |
| 1.00000e-09 | 6.54187e-07 | 7.29448e-07 | 8.15840e-07 | 8.18996e-07 | 1.02854e-06 |

| Pa\K        | 400.000     | 500.000     | 600.000     | 700.000     | 800.000     |
|-------------|-------------|-------------|-------------|-------------|-------------|
| 1.00000e+08 | 1.50824e-07 | 6.65969e-05 | 0.000422780 | 0.000932280 | 0.000896536 |
| 1.00000e+07 | 3.65755e-08 | 2.33662e-05 | 0.000926047 | 0.00390326  | 0.00520928  |
| 1.00000e+06 | 9.53840e-09 | 4.18956e-06 | 0.000352232 | 0.00279139  | 0.00614076  |
| 100000.     | 2.59345e-08 | 2.72506e-06 | 0.000122954 | 0.00105914  | 0.00325813  |
| 10000.0     | 1.50398e-07 | 3.50193e-06 | 4.99246e-05 | 0.000316122 | 0.00114321  |
| 1000.00     | 5.45005e-07 | 5.10356e-06 | 3.10085e-05 | 0.000123435 | 0.000380162 |
| 100.000     | 1.59998e-06 | 8.88259e-06 | 3.41803e-05 | 0.000100937 | 0.000248408 |
| 10.0000     | 2.70288e-06 | 1.06872e-05 | 3.55140e-05 | 9.88941e-05 | 0.000233950 |
| 1.00000     | 2.94688e-06 | 1.09220e-05 | 3.56485e-05 | 9.86777e-05 | 0.000232499 |
| 0.100000    | 2.97124e-06 | 1.09445e-05 | 3.56614e-05 | 9.86552e-05 | 0.000232354 |
| 0.0100000   | 2.97365e-06 | 1.09467e-05 | 3.56627e-05 | 9.86533e-05 | 0.000232340 |
| 0.00100000  | 2.97389e-06 | 1.09469e-05 | 3.56628e-05 | 9.86533e-05 | 0.000232338 |
| 0.000100000 | 2.97391e-06 | 1.09470e-05 | 3.56628e-05 | 9.86533e-05 | 0.000232338 |
| 1.00000e-05 | 2.97391e-06 | 1.09470e-05 | 3.56628e-05 | 9.86533e-05 | 0.000232338 |
| 1.00000e-06 | 2.97391e-06 | 1.09470e-05 | 3.56628e-05 | 9.86533e-05 | 0.000232338 |
| 1.00000e-07 | 2.97391e-06 | 1.09470e-05 | 3.56628e-05 | 9.86533e-05 | 0.000232338 |
| 1.00000e-08 | 2.97391e-06 | 1.09470e-05 | 3.56628e-05 | 9.86533e-05 | 0.000232338 |
| 1.00000e-09 | 2.97391e-06 | 1.09470e-05 | 3.56628e-05 | 9.86533e-05 | 0.000232338 |

| Pa\K        | 900.000     | 1000.00     | 1100.00     | 1200.00     | 1300.00     |
|-------------|-------------|-------------|-------------|-------------|-------------|
| 1.00000e+08 | 0.000484209 | 0.000293786 | 0.000228359 | 0.000193707 | 0.000160248 |
| 1.00000e+07 | 0.00397325  | 0.00289780  | 0.00244744  | 0.00225168  | 0.00213368  |
| 1.00000e+06 | 0.00783954  | 0.00811825  | 0.00788891  | 0.00758296  | 0.00728393  |
| 100000.     | 0.00606614  | 0.00789553  | 0.00834097  | 0.00814642  | 0.00777884  |
| 10000.0     | 0.00279998  | 0.00437059  | 0.00487381  | 0.00485044  | 0.00483929  |
| 1000.00     | 0.000944992 | 0.00162882  | 0.00210842  | 0.00257749  | 0.00318776  |
| 100.000     | 0.000526504 | 0.000941617 | 0.00147006  | 0.00213038  | 0.00291422  |
| 10.0000     | 0.000479238 | 0.000864118 | 0.00140086  | 0.00208476  | 0.00288808  |
| 1.00000     | 0.000474682 | 0.000856902 | 0.00139450  | 0.00208062  | 0.00288576  |
| 0.100000    | 0.000474236 | 0.000856214 | 0.00139391  | 0.00208024  | 0.00288555  |
| 0.0100000   | 0.000474191 | 0.000856147 | 0.00139384  | 0.00208021  | 0.00288553  |
| 0.00100000  | 0.000474187 | 0.000856147 | 0.00139384  | 0.00208020  | 0.00288553  |
| 0.000100000 | 0.000474187 | 0.000856147 | 0.00139384  | 0.00208020  | 0.00288553  |
| 1.00000e-05 | 0.000474187 | 0.000856147 | 0.00139384  | 0.00208020  | 0.00288553  |
| 1.00000e-06 | 0.000474187 | 0.000856147 | 0.00139384  | 0.00208020  | 0.00288553  |
| 1.00000e-07 | 0.000474187 | 0.000856147 | 0.00139384  | 0.00208020  | 0.00288553  |
| 1.00000e-08 | 0.000474187 | 0.000856147 | 0.00139384  | 0.00208020  | 0.00288553  |
| 1.00000e-09 | 0.000474187 | 0.000856147 | 0.00139384  | 0.00208020  | 0.00288553  |

| Pa\K | 1400.00 | 1500.00 | 1750.00 | 2000.00 | 2250.00 |
|------|---------|---------|---------|---------|---------|
|------|---------|---------|---------|---------|---------|

|             |             |             |            |            |            |
|-------------|-------------|-------------|------------|------------|------------|
| 1.00000e+08 | 0.000128716 | 0.000107214 | 0.00547703 | 0.00544450 | 0.00538105 |
| 1.00000e+07 | 0.00202153  | 0.00190047  | 0.0105234  | 0.00983306 | 0.00899335 |
| 1.00000e+06 | 0.00699928  | 0.00673427  | 0.0119308  | 0.0105133  | 0.00931901 |
| 100000.     | 0.00744324  | 0.00722476  | 0.00951171 | 0.00887018 | 0.00843711 |
| 10000.0     | 0.00502659  | 0.00540896  | 0.00722028 | 0.00790204 | 0.00808788 |
| 1000.00     | 0.00393130  | 0.00473957  | 0.00666101 | 0.00773195 | 0.00804055 |
| 100.000     | 0.00377754  | 0.00465974  | 0.00659605 | 0.00771462 | 0.00803624 |
| 10.0000     | 0.00376385  | 0.00465327  | 0.00658980 | 0.00771299 | 0.00803590 |
| 1.00000     | 0.00376268  | 0.00465275  | 0.00658920 | 0.00771283 | 0.00803585 |
| 0.100000    | 0.00376258  | 0.00465271  | 0.00658914 | 0.00771283 | 0.00803585 |
| 0.0100000   | 0.00376257  | 0.00465271  | 0.00658914 | 0.00771283 | 0.00803585 |
| 0.00100000  | 0.00376256  | 0.00465271  | 0.00658914 | 0.00771283 | 0.00803585 |
| 0.000100000 | 0.00376256  | 0.00465271  | 0.00658914 | 0.00771283 | 0.00803585 |
| 1.00000e-05 | 0.00376256  | 0.00465271  | 0.00658914 | 0.00771283 | 0.00803585 |
| 1.00000e-06 | 0.00376256  | 0.00465271  | 0.00658914 | 0.00771283 | 0.00803585 |
| 1.00000e-07 | 0.00376256  | 0.00465271  | 0.00658914 | 0.00771283 | 0.00803585 |
| 1.00000e-08 | 0.00376256  | 0.00465271  | 0.00658914 | 0.00771283 | 0.00803585 |
| 1.00000e-09 | 0.00376256  | 0.00465271  | 0.00658914 | 0.00771283 | 0.00803585 |

rad15

=====

| Pa\K        | 20.0000     | 30.0000     | 40.0000     | 50.0000     | 60.0000     |
|-------------|-------------|-------------|-------------|-------------|-------------|
| 1.00000e+08 | 3.03571e-10 | 2.03392e-09 | 5.65979e-09 | 1.13061e-08 | 1.90245e-08 |
| 1.00000e+07 | 1.00225e-07 | 4.60698e-07 | 1.05589e-06 | 1.86705e-06 | 2.88408e-06 |
| 1.00000e+06 | 1.18701e-05 | 4.51916e-05 | 9.32197e-05 | 0.000151956 | 0.000218771 |
| 100000.     | 0.000658805 | 0.00155432  | 0.00222571  | 0.00269647  | 0.00302243  |
| 10000.0     | 0.00356154  | 0.00335570  | 0.00311893  | 0.00295345  | 0.00283195  |
| 1000.00     | 0.00242171  | 0.00208282  | 0.00190552  | 0.00178546  | 0.00169413  |
| 100.000     | 0.00136693  | 0.00103399  | 0.000833132 | 0.000689185 | 0.000578603 |
| 10.0000     | 0.000252722 | 6.36827e-05 | 2.04812e-05 | 7.69175e-06 | 3.23338e-06 |
| 1.00000     | 8.81178e-08 | 9.70464e-10 | 5.66591e-11 | 7.26003e-12 | 1.47225e-12 |
| 0.100000    | 5.81125e-15 | 3.11756e-17 | 1.86618e-18 | 2.80471e-19 | 6.86489e-20 |
| 0.0100000   | 5.21536e-22 | 7.12305e-24 | 7.53806e-25 | 1.72630e-25 | 5.95423e-26 |
| 0.00100000  | 1.20138e-27 | 4.28399e-29 | 7.52782e-30 | 2.44006e-30 | 1.09960e-30 |
| 0.000100000 | 4.53689e-32 | 3.21345e-33 | 8.13453e-34 | 3.38855e-34 | 1.85319e-34 |
| 1.00000e-05 | 1.28352e-35 | 1.50900e-36 | 5.02146e-37 | 2.52807e-37 | 1.60135e-37 |
| 1.00000e-06 | 1.65642e-38 | 2.89813e-39 | 1.19844e-39 | 7.01968e-40 | 5.00180e-40 |
| 1.00000e-07 | 7.24853e-41 | 1.79241e-41 | 9.05249e-42 | 6.12770e-42 | 4.89932e-42 |
| 1.00000e-08 | 1.05240e-42 | 3.96314e-43 | 2.53869e-43 | 2.01711e-43 | 1.81448e-43 |
| 1.00000e-09 | 5.61453e-44 | 2.73168e-44 | 1.93945e-44 | 1.63007e-44 | 1.51961e-44 |

| Pa\K        | 70.0000     | 80.0000     | 90.0000     | 100.000     | 110.000     |
|-------------|-------------|-------------|-------------|-------------|-------------|
| 1.00000e+08 | 2.88647e-08 | 4.08997e-08 | 5.52342e-08 | 7.20107e-08 | 9.14157e-08 |
| 1.00000e+07 | 4.10301e-06 | 5.52480e-06 | 7.15455e-06 | 9.00117e-06 | 1.10775e-05 |
| 1.00000e+06 | 0.000291861 | 0.000369965 | 0.000452177 | 0.000537844 | 0.000626494 |
| 100000.     | 0.00324713  | 0.00340097  | 0.00350481  | 0.00357303  | 0.00361569  |
| 10000.0     | 0.00273751  | 0.00266090  | 0.00259674  | 0.00254170  | 0.00249357  |
| 1000.00     | 0.00161984  | 0.00155669  | 0.00150132  | 0.00145160  | 0.00140613  |
| 100.000     | 0.000490379 | 0.000418288 | 0.000358404 | 0.000308065 | 0.000265374 |
| 10.0000     | 1.48295e-06 | 7.29338e-07 | 3.79932e-07 | 2.07730e-07 | 1.18381e-07 |
| 1.00000     | 4.03453e-13 | 1.36748e-13 | 5.42894e-14 | 2.43589e-14 | 1.20514e-14 |
| 0.100000    | 2.27947e-20 | 9.33888e-21 | 4.46402e-21 | 2.40188e-21 | 1.41967e-21 |
| 0.0100000   | 2.64957e-26 | 1.40331e-26 | 8.43916e-27 | 5.59381e-27 | 4.00657e-27 |
| 0.00100000  | 6.09639e-31 | 3.89956e-31 | 2.77126e-31 | 2.13653e-31 | 1.75883e-31 |
| 0.000100000 | 1.20524e-34 | 8.84408e-35 | 7.09864e-35 | 6.11087e-35 | 5.56861e-35 |
| 1.00000e-05 | 1.17593e-37 | 9.58113e-38 | 8.43857e-38 | 7.90231e-38 | 7.78174e-38 |
| 1.00000e-06 | 4.04878e-40 | 3.58771e-40 | 3.40409e-40 | 3.41009e-40 | 3.57309e-40 |
| 1.00000e-07 | 4.36837e-42 | 4.20956e-42 | 4.30288e-42 | 4.61033e-42 | 5.13735e-42 |
| 1.00000e-08 | 1.77290e-43 | 1.83933e-43 | 1.99882e-43 | 2.25575e-43 | 2.62877e-43 |
| 1.00000e-09 | 1.52211e-44 | 1.60841e-44 | 1.77286e-44 | 2.02357e-44 | 2.38024e-44 |

| Pa\K        | 120.000     | 130.000     | 140.000     | 150.000     | 160.000     |
|-------------|-------------|-------------|-------------|-------------|-------------|
| 1.00000e+08 | 1.13688e-07 | 1.39127e-07 | 1.68110e-07 | 2.01105e-07 | 2.38692e-07 |
| 1.00000e+07 | 1.34006e-05 | 1.59922e-05 | 1.88798e-05 | 2.20968e-05 | 2.56845e-05 |
| 1.00000e+06 | 0.000717793 | 0.000811511 | 0.000907504 | 0.00100569  | 0.00110601  |
| 100000.     | 0.00363990  | 0.00365075  | 0.00365193  | 0.00364611  | 0.00363526  |
| 10000.0     | 0.00245082  | 0.00241237  | 0.00237739  | 0.00234525  | 0.00231549  |
| 1000.00     | 0.00136392  | 0.00132423  | 0.00128652  | 0.00125034  | 0.00121533  |
| 100.000     | 0.000228923 | 0.000197637 | 0.000170677 | 0.000147374 | 0.000127187 |
| 10.0000     | 6.99336e-08 | 4.26400e-08 | 2.67383e-08 | 1.71935e-08 | 1.13096e-08 |
| 1.00000     | 6.45901e-15 | 3.70120e-15 | 2.24506e-15 | 1.43040e-15 | 9.51421e-16 |
| 0.100000    | 9.06006e-22 | 6.16435e-22 | 4.42937e-22 | 3.33699e-22 | 2.62127e-22 |
| 0.0100000   | 3.05850e-27 | 2.46390e-27 | 2.07963e-27 | 1.82947e-27 | 1.67149e-27 |
| 0.00100000  | 1.52920e-31 | 1.39343e-31 | 1.32360e-31 | 1.30630e-31 | 1.33804e-31 |
| 0.000100000 | 5.32310e-35 | 5.30350e-35 | 5.48216e-35 | 5.86112e-35 | 6.47006e-35 |
| 1.00000e-05 | 7.99668e-38 | 8.52860e-38 | 9.40260e-38 | 1.06844e-37 | 1.24872e-37 |

|             |             |             |             |             |             |
|-------------|-------------|-------------|-------------|-------------|-------------|
| 1.00000e-06 | 3.89057e-40 | 4.38195e-40 | 5.08794e-40 | 6.07520e-40 | 7.44608e-40 |
| 1.00000e-07 | 5.92155e-42 | 7.03337e-42 | 8.58475e-42 | 1.07464e-41 | 1.37762e-41 |
| 1.00000e-08 | 3.15120e-43 | 3.87516e-43 | 4.87930e-43 | 6.28180e-43 | 8.26127e-43 |
| 1.00000e-09 | 2.87562e-44 | 3.55987e-44 | 4.50817e-44 | 5.83331e-44 | 7.70575e-44 |

| Pa\K        | 170.000     | 180.000     | 190.000     | 200.000     | 210.000     |
|-------------|-------------|-------------|-------------|-------------|-------------|
| 1.00000e+08 | 2.81590e-07 | 3.30692e-07 | 3.87106e-07 | 4.52216e-07 | 5.27766e-07 |
| 1.00000e+07 | 2.96927e-05 | 3.41814e-05 | 3.92228e-05 | 4.49041e-05 | 5.13295e-05 |
| 1.00000e+06 | 0.00120848  | 0.00131308  | 0.00141981  | 0.00152865  | 0.00163957  |
| 100000.     | 0.00362081  | 0.00360386  | 0.00358519  | 0.00356538  | 0.00354486  |
| 10000.0     | 0.00228768  | 0.00226150  | 0.00223670  | 0.00221305  | 0.00219032  |
| 1000.00     | 0.00118120  | 0.00114771  | 0.00111465  | 0.00108184  | 0.00104914  |
| 100.000     | 0.000109676 | 9.44709e-05 | 8.12673e-05 | 6.98049e-05 | 5.98617e-05 |
| 10.0000     | 7.59450e-09 | 5.19721e-09 | 3.61938e-09 | 2.56186e-09 | 1.84117e-09 |
| 1.00000     | 6.57436e-16 | 4.70104e-16 | 3.46748e-16 | 2.63151e-16 | 2.05057e-16 |
| 0.100000    | 2.13779e-22 | 1.80439e-22 | 1.57280e-22 | 1.41444e-22 | 1.31334e-22 |
| 0.0100000   | 1.58322e-27 | 1.55555e-27 | 1.59260e-27 | 1.71911e-27 | 2.00432e-27 |
| 0.00100000  | 1.42567e-31 | 1.59296e-31 | 1.90177e-31 | 2.51292e-31 | 3.86538e-31 |
| 0.000100000 | 7.37510e-35 | 8.70684e-35 | 1.07363e-34 | 1.40885e-34 | 2.03750e-34 |
| 1.00000e-05 | 1.49893e-37 | 1.84676e-37 | 2.33632e-37 | 3.04185e-37 | 4.10110e-37 |
| 1.00000e-06 | 9.35538e-40 | 1.20380e-39 | 1.58550e-39 | 2.13709e-39 | 2.94931e-39 |
| 1.00000e-07 | 1.80667e-41 | 2.42207e-41 | 3.31782e-41 | 4.64264e-41 | 6.63593e-41 |
| 1.00000e-08 | 1.10907e-42 | 1.51923e-42 | 2.12299e-42 | 3.02617e-42 | 4.40034e-42 |
| 1.00000e-09 | 1.03862e-43 | 1.42784e-43 | 2.00176e-43 | 2.86183e-43 | 4.17263e-43 |

| Pa\K        | 220.000     | 230.000     | 240.000     | 250.000     | 260.000     |
|-------------|-------------|-------------|-------------|-------------|-------------|
| 1.00000e+08 | 6.15961e-07 | 7.19631e-07 | 8.42436e-07 | 9.89190e-07 | 1.16629e-06 |
| 1.00000e+07 | 5.86248e-05 | 6.69418e-05 | 7.64640e-05 | 8.74138e-05 | 0.000100062 |
| 1.00000e+06 | 0.00175249  | 0.00186729  | 0.00198380  | 0.00210180  | 0.00222104  |
| 100000.     | 0.00352397  | 0.00350291  | 0.00348187  | 0.00346096  | 0.00344026  |
| 10000.0     | 0.00216836  | 0.00214700  | 0.00212610  | 0.00210553  | 0.00208516  |
| 1000.00     | 0.00101641  | 0.000983546 | 0.000950490 | 0.000917178 | 0.000883578 |
| 100.000     | 5.12466e-05 | 4.37938e-05 | 3.73583e-05 | 3.18126e-05 | 2.70446e-05 |
| 10.0000     | 1.34239e-09 | 9.92207e-10 | 7.43049e-10 | 5.63541e-10 | 4.32691e-10 |
| 1.00000     | 1.63805e-16 | 1.33982e-16 | 1.12124e-16 | 9.59749e-17 | 8.40622e-17 |
| 0.100000    | 1.26344e-22 | 1.26972e-22 | 1.35488e-22 | 1.57746e-22 | 2.07693e-22 |
| 0.0100000   | 2.62830e-27 | 4.06807e-27 | 7.63093e-27 | 1.70224e-26 | 4.30576e-26 |
| 0.00100000  | 7.22023e-31 | 1.63660e-30 | 4.31166e-30 | 1.25458e-29 | 3.88587e-29 |
| 0.000100000 | 3.41685e-34 | 6.94179e-34 | 1.70996e-33 | 4.89008e-33 | 1.54043e-32 |
| 1.00000e-05 | 5.80704e-37 | 8.88981e-37 | 1.54558e-36 | 3.22875e-36 | 8.28601e-36 |
| 1.00000e-06 | 4.17377e-39 | 6.08050e-39 | 9.20193e-39 | 1.47541e-38 | 2.60352e-38 |
| 1.00000e-07 | 9.69052e-41 | 1.44655e-40 | 2.20994e-40 | 3.46425e-40 | 5.60399e-40 |
| 1.00000e-08 | 6.52837e-42 | 9.88504e-42 | 1.52826e-41 | 2.41400e-41 | 3.89979e-41 |
| 1.00000e-09 | 6.20580e-43 | 9.41747e-43 | 1.45875e-42 | 2.30743e-42 | 3.72923e-42 |

| Pa\K        | 270.000     | 280.000     | 290.000     | 300.000     | 310.000     |
|-------------|-------------|-------------|-------------|-------------|-------------|
| 1.00000e+08 | 1.38235e-06 | 1.64899e-06 | 1.98171e-06 | 8.18359e-06 | 2.93088e-06 |
| 1.00000e+07 | 0.000114734 | 0.000131825 | 0.000151798 | 0.000348117 | 0.000202510 |
| 1.00000e+06 | 0.00234115  | 0.00246178  | 0.00258246  | 0.00308509  | 0.00282156  |
| 100000.     | 0.00341981  | 0.00339965  | 0.00337980  | 0.00337673  | 0.00334051  |
| 10000.0     | 0.00206489  | 0.00204460  | 0.00202420  | 0.00197029  | 0.00198237  |
| 1000.00     | 0.000849679 | 0.000815493 | 0.000781052 | 0.000648000 | 0.000711536 |
| 100.000     | 2.29547e-05 | 1.94550e-05 | 1.64677e-05 | 1.37785e-05 | 1.17614e-05 |
| 10.0000     | 3.36248e-10 | 2.64424e-10 | 2.10409e-10 | 1.63515e-09 | 1.38005e-09 |
| 1.00000     | 7.54451e-17 | 6.95918e-17 | 6.63442e-17 | 2.99246e-14 | 6.94507e-17 |
| 0.100000    | 3.18438e-22 | 5.69688e-22 | 1.15636e-21 | 3.97738e-18 | 5.98893e-21 |
| 0.0100000   | 1.18069e-25 | 3.40518e-25 | 1.01417e-24 | 6.78058e-21 | 9.48376e-24 |
| 0.00100000  | 1.25307e-28 | 4.15070e-28 | 1.39941e-27 | 1.83049e-23 | 1.63004e-26 |
| 0.000100000 | 5.14434e-32 | 1.77973e-31 | 6.29062e-31 | 3.72106e-26 | 8.08877e-30 |
| 1.00000e-05 | 2.52130e-35 | 8.55870e-35 | 3.08537e-34 | 2.72123e-28 | 4.31435e-33 |
| 1.00000e-06 | 5.34859e-38 | 1.33928e-37 | 4.05622e-37 | 5.89512e-30 | 5.22624e-36 |
| 1.00000e-07 | 9.47164e-40 | 1.71508e-39 | 3.47192e-39 | 2.57881e-31 | 2.35615e-38 |
| 1.00000e-08 | 6.45503e-41 | 1.09862e-40 | 1.93657e-40 | 2.04672e-32 | 7.15678e-40 |
| 1.00000e-09 | 6.16214e-42 | 1.04194e-41 | 1.80515e-41 | 1.98750e-33 | 5.88699e-41 |

| Pa\K        | 400.000     | 500.000     | 600.000     | 700.000     | 800.000     |
|-------------|-------------|-------------|-------------|-------------|-------------|
| 1.00000e+08 | 0.000431514 | 0.00516934  | 0.00888918  | 0.00879970  | 0.00536718  |
| 1.00000e+07 | 0.00170449  | 0.00464362  | 0.00586042  | 0.00391439  | 0.00187206  |
| 1.00000e+06 | 0.00403433  | 0.00448527  | 0.00412241  | 0.00220056  | 0.000762317 |
| 100000.     | 0.00317900  | 0.00289039  | 0.00219285  | 0.000966656 | 0.000322205 |
| 10000.0     | 0.00167193  | 0.00121302  | 0.000667115 | 0.000244493 | 8.89498e-05 |
| 1000.00     | 0.000340126 | 0.000149316 | 6.24879e-05 | 2.42608e-05 | 1.16378e-05 |
| 100.000     | 3.61618e-06 | 1.35927e-06 | 8.18696e-07 | 6.01790e-07 | 5.49294e-07 |
| 10.0000     | 7.06947e-10 | 9.95336e-10 | 2.63185e-09 | 7.01556e-09 | 1.70757e-08 |
| 1.00000     | 1.53247e-13 | 4.05482e-12 | 2.03001e-11 | 1.14613e-10 | 6.65003e-10 |
| 0.100000    | 1.21928e-15 | 1.04092e-13 | 4.83903e-13 | 3.15977e-12 | 3.48726e-11 |

|             |             |             |             |             |             |
|-------------|-------------|-------------|-------------|-------------|-------------|
| 0.0100000   | 1.61590e-17 | 2.00658e-15 | 1.07401e-14 | 1.20866e-13 | 2.21643e-12 |
| 0.00100000  | 7.37540e-20 | 1.26565e-17 | 1.18926e-16 | 5.63591e-15 | 1.54588e-13 |
| 0.000100000 | 1.30933e-22 | 3.74845e-20 | 1.69590e-18 | 3.19336e-16 | 1.14940e-14 |
| 1.00000e-05 | 3.08554e-25 | 1.61562e-22 | 6.32709e-20 | 2.07104e-17 | 8.90757e-16 |
| 1.00000e-06 | 2.42706e-27 | 2.61615e-24 | 3.63220e-21 | 1.50667e-18 | 7.21205e-17 |
| 1.00000e-07 | 8.96529e-29 | 1.38978e-25 | 2.71620e-22 | 1.25799e-19 | 6.33588e-18 |
| 1.00000e-08 | 7.29213e-30 | 1.22230e-26 | 2.53725e-23 | 1.20603e-20 | 6.14390e-19 |
| 1.00000e-09 | 7.11712e-31 | 1.20423e-27 | 2.51702e-24 | 1.20011e-21 | 6.12184e-20 |

| Pa\K        | 900.000     | 1000.00     | 1100.00     | 1200.00     | 1300.00     |
|-------------|-------------|-------------|-------------|-------------|-------------|
| 1.00000e+08 | 0.00265350  | 0.00165575  | 0.00143485  | 0.00190757  | 0.00346644  |
| 1.00000e+07 | 0.00112097  | 0.000900815 | 0.000956479 | 0.00144018  | 0.00279627  |
| 1.00000e+06 | 0.000338237 | 0.000260992 | 0.000312993 | 0.000526913 | 0.00106411  |
| 100000.     | 0.000130189 | 7.92303e-05 | 8.44785e-05 | 0.000138475 | 0.000279172 |
| 10000.0     | 4.07975e-05 | 2.49353e-05 | 2.44191e-05 | 3.51435e-05 | 6.14804e-05 |
| 1000.00     | 6.59617e-06 | 4.26969e-06 | 3.87390e-06 | 4.80469e-06 | 7.13448e-06 |
| 100.000     | 4.68060e-07 | 3.65088e-07 | 3.42526e-07 | 4.00660e-07 | 5.44447e-07 |
| 10.0000     | 2.55617e-08 | 2.60435e-08 | 2.66182e-08 | 3.01854e-08 | 3.88489e-08 |
| 1.00000     | 1.59770e-09 | 2.00236e-09 | 2.14309e-09 | 2.29941e-09 | 2.85122e-09 |
| 0.100000    | 1.16993e-10 | 1.66653e-10 | 1.78095e-10 | 1.77352e-10 | 2.17714e-10 |
| 0.0100000   | 9.37135e-12 | 1.43465e-11 | 1.48568e-11 | 1.36921e-11 | 1.73210e-11 |
| 0.00100000  | 7.69555e-13 | 1.22154e-12 | 1.20878e-12 | 1.04126e-12 | 1.42979e-12 |
| 0.000100000 | 6.35314e-14 | 1.01394e-13 | 9.52639e-14 | 7.79601e-14 | 1.21964e-13 |
| 1.00000e-05 | 5.22188e-15 | 8.21879e-15 | 7.34645e-15 | 5.82511e-15 | 1.07598e-14 |
| 1.00000e-06 | 4.34599e-16 | 6.70944e-16 | 5.76919e-16 | 4.52483e-16 | 9.87537e-16 |
| 1.00000e-07 | 3.86182e-17 | 5.89448e-17 | 4.97226e-17 | 3.90964e-17 | 9.47751e-17 |
| 1.00000e-08 | 3.75607e-18 | 5.72161e-18 | 4.80970e-18 | 3.78873e-18 | 9.40177e-18 |
| 1.00000e-09 | 3.74397e-19 | 5.70197e-19 | 4.79140e-19 | 3.77523e-19 | 9.39333e-19 |

| Pa\K        | 1400.00     | 1500.00     | 1750.00     | 2000.00     | 2250.00     |
|-------------|-------------|-------------|-------------|-------------|-------------|
| 1.00000e+08 | 0.00630675  | 0.00926339  | 0.000477383 | 0.000528431 | 0.000520050 |
| 1.00000e+07 | 0.00575522  | 0.0100785   | 0.000539589 | 0.000520954 | 0.000471345 |
| 1.00000e+06 | 0.00211189  | 0.00360010  | 0.000492239 | 0.000357359 | 0.000244448 |
| 100000.     | 0.000538293 | 0.000837060 | 0.000207253 | 0.000105508 | 5.26939e-05 |
| 10000.0     | 0.000104863 | 0.000142195 | 3.75457e-05 | 1.47541e-05 | 6.23099e-06 |
| 1000.00     | 1.09678e-05 | 1.40754e-05 | 4.10164e-06 | 1.50815e-06 | 6.15856e-07 |
| 100.000     | 8.41225e-07 | 1.14897e-06 | 4.00268e-07 | 1.47517e-07 | 6.01957e-08 |
| 10.0000     | 6.43974e-08 | 9.70230e-08 | 3.90590e-08 | 1.45147e-08 | 5.93449e-09 |
| 1.00000     | 5.25242e-09 | 8.67509e-09 | 3.84580e-09 | 1.43752e-09 | 5.88563e-10 |
| 0.100000    | 4.55041e-10 | 8.09169e-10 | 3.81002e-10 | 1.42932e-10 | 5.85686e-11 |
| 0.0100000   | 4.14626e-11 | 7.78245e-11 | 3.78808e-11 | 1.42442e-11 | 5.83990e-12 |
| 0.00100000  | 3.92131e-12 | 7.63864e-12 | 3.78124e-12 | 1.42293e-12 | 5.83495e-13 |
| 0.000100000 | 3.78461e-13 | 7.56205e-13 | 3.77893e-13 | 1.42242e-13 | 5.83323e-14 |
| 1.00000e-05 | 3.69773e-14 | 7.51619e-14 | 3.77777e-14 | 1.42216e-14 | 5.83240e-15 |
| 1.00000e-06 | 3.64673e-15 | 7.49021e-15 | 3.77714e-15 | 1.42203e-15 | 5.83196e-16 |
| 1.00000e-07 | 3.62462e-16 | 7.47923e-16 | 3.77701e-16 | 1.42201e-16 | 5.83191e-17 |
| 1.00000e-08 | 3.62052e-17 | 7.47723e-17 | 3.77700e-17 | 1.42200e-17 | 5.83186e-18 |
| 1.00000e-09 | 3.62007e-18 | 7.47702e-18 | 3.77699e-18 | 1.42200e-18 | 5.83186e-19 |

PhCCH+CH3

=====

| Pa\K        | 20.0000     | 30.0000     | 40.0000     | 50.0000     | 60.0000     |
|-------------|-------------|-------------|-------------|-------------|-------------|
| 1.00000e+08 | 1.14331e-22 | 8.50818e-22 | 2.61821e-21 | 5.76189e-21 | 1.06412e-20 |
| 1.00000e+07 | 5.41762e-20 | 2.77010e-19 | 6.75151e-19 | 1.25810e-18 | 2.04372e-18 |
| 1.00000e+06 | 6.83398e-18 | 2.35120e-17 | 4.60824e-17 | 7.42049e-17 | 1.08615e-16 |
| 100000.     | 2.82590e-16 | 1.19520e-15 | 3.48830e-15 | 8.16982e-15 | 1.65143e-14 |
| 10000.0     | 1.21035e-13 | 1.03671e-12 | 3.49542e-12 | 8.26049e-12 | 1.61931e-11 |
| 1000.00     | 9.81727e-11 | 6.09061e-10 | 1.63114e-09 | 3.21170e-09 | 5.40498e-09 |
| 100.000     | 2.05644e-08 | 7.83618e-08 | 1.59798e-07 | 2.58365e-07 | 3.70052e-07 |
| 10.0000     | 8.31406e-07 | 1.56971e-06 | 2.01219e-06 | 2.31012e-06 | 2.53449e-06 |
| 1.00000     | 2.74786e-06 | 3.02711e-06 | 3.21148e-06 | 3.37462e-06 | 3.52807e-06 |
| 0.100000    | 3.52009e-06 | 3.68587e-06 | 3.78233e-06 | 3.87283e-06 | 3.96586e-06 |
| 0.0100000   | 3.73773e-06 | 3.77338e-06 | 3.83213e-06 | 3.90696e-06 | 3.99185e-06 |
| 0.00100000  | 3.74878e-06 | 3.77865e-06 | 3.83566e-06 | 3.90964e-06 | 3.99403e-06 |
| 0.000100000 | 3.74982e-06 | 3.77917e-06 | 3.83601e-06 | 3.90991e-06 | 3.99425e-06 |
| 1.00000e-05 | 3.74992e-06 | 3.77922e-06 | 3.83604e-06 | 3.90993e-06 | 3.99427e-06 |
| 1.00000e-06 | 3.74993e-06 | 3.77922e-06 | 3.83605e-06 | 3.90994e-06 | 3.99427e-06 |
| 1.00000e-07 | 3.74993e-06 | 3.77922e-06 | 3.83605e-06 | 3.90994e-06 | 3.99427e-06 |
| 1.00000e-08 | 3.74993e-06 | 3.77922e-06 | 3.83605e-06 | 3.90994e-06 | 3.99427e-06 |
| 1.00000e-09 | 3.74993e-06 | 3.77922e-06 | 3.83605e-06 | 3.90994e-06 | 3.99427e-06 |

| Pa\K        | 70.0000     | 80.0000     | 90.0000     | 100.000     | 110.000     |
|-------------|-------------|-------------|-------------|-------------|-------------|
| 1.00000e+08 | 1.76754e-20 | 2.73857e-20 | 4.04397e-20 | 5.77088e-20 | 8.03480e-20 |
| 1.00000e+07 | 3.05903e-18 | 4.34195e-18 | 5.94347e-18 | 7.93121e-18 | 1.03948e-17 |
| 1.00000e+06 | 1.50788e-16 | 2.02982e-16 | 2.68423e-16 | 3.51691e-16 | 4.59345e-16 |
| 100000.     | 3.01881e-14 | 5.14291e-14 | 8.32966e-14 | 1.30037e-13 | 1.97633e-13 |



|             |             |             |             |             |             |
|-------------|-------------|-------------|-------------|-------------|-------------|
| 10000.0     | 2.83250e-11 | 4.59415e-11 | 7.06792e-11 | 1.04654e-10 | 1.50638e-10 |
| 1000.00     | 8.28410e-09 | 1.19467e-08 | 1.65185e-08 | 2.21589e-08 | 2.90682e-08 |
| 100.000     | 4.92312e-07 | 6.23562e-07 | 7.62838e-07 | 9.09602e-07 | 1.06365e-06 |
| 10.0000     | 2.71936e-06 | 2.88270e-06 | 3.03478e-06 | 3.18193e-06 | 3.32847e-06 |
| 1.00000     | 3.67648e-06 | 3.82284e-06 | 3.96933e-06 | 4.11771e-06 | 4.26954e-06 |
| 0.100000    | 4.06344e-06 | 4.16656e-06 | 4.27592e-06 | 4.39217e-06 | 4.51603e-06 |
| 0.0100000   | 4.08454e-06 | 4.18440e-06 | 4.29144e-06 | 4.40594e-06 | 4.52844e-06 |
| 0.00100000  | 4.08638e-06 | 4.18601e-06 | 4.29286e-06 | 4.40722e-06 | 4.52960e-06 |
| 0.000100000 | 4.08657e-06 | 4.18617e-06 | 4.29300e-06 | 4.40735e-06 | 4.52971e-06 |
| 1.00000e-05 | 4.08659e-06 | 4.18618e-06 | 4.29301e-06 | 4.40736e-06 | 4.52973e-06 |
| 1.00000e-06 | 4.08659e-06 | 4.18618e-06 | 4.29301e-06 | 4.40736e-06 | 4.52973e-06 |
| 1.00000e-07 | 4.08659e-06 | 4.18618e-06 | 4.29301e-06 | 4.40736e-06 | 4.52973e-06 |
| 1.00000e-08 | 4.08659e-06 | 4.18618e-06 | 4.29301e-06 | 4.40736e-06 | 4.52973e-06 |
| 1.00000e-09 | 4.08659e-06 | 4.18618e-06 | 4.29301e-06 | 4.40736e-06 | 4.52973e-06 |

| Pa\K        | 120.000     | 130.000     | 140.000     | 150.000     | 160.000     |
|-------------|-------------|-------------|-------------|-------------|-------------|
| 1.00000e+08 | 1.09910e-19 | 1.48510e-19 | 1.99058e-19 | 2.65595e-19 | 3.53788e-19 |
| 1.00000e+07 | 1.34539e-17 | 1.72695e-17 | 2.20596e-17 | 2.81220e-17 | 3.58666e-17 |
| 1.00000e+06 | 6.00920e-16 | 7.90508e-16 | 1.04929e-15 | 1.40963e-15 | 1.92175e-15 |
| 100000.     | 2.94635e-13 | 4.33433e-13 | 6.32196e-13 | 9.17862e-13 | 1.33073e-12 |
| 10000.0     | 2.12309e-10 | 2.94596e-10 | 4.04148e-10 | 5.49990e-10 | 7.44418e-10 |
| 1000.00     | 3.74983e-08 | 4.77651e-08 | 6.02642e-08 | 7.54880e-08 | 9.40457e-08 |
| 100.000     | 1.22504e-06 | 1.39408e-06 | 1.57129e-06 | 1.75737e-06 | 1.95320e-06 |
| 10.0000     | 3.47755e-06 | 3.63177e-06 | 3.79338e-06 | 3.96449e-06 | 4.14718e-06 |
| 1.00000     | 4.42631e-06 | 4.58952e-06 | 4.76069e-06 | 4.94145e-06 | 5.13343e-06 |
| 0.100000    | 4.64834e-06 | 4.79006e-06 | 4.94230e-06 | 5.10632e-06 | 5.28347e-06 |
| 0.0100000   | 4.65964e-06 | 4.80045e-06 | 4.95191e-06 | 5.11527e-06 | 5.29185e-06 |
| 0.00100000  | 4.66071e-06 | 4.80144e-06 | 4.95283e-06 | 5.11613e-06 | 5.29266e-06 |
| 0.000100000 | 4.66081e-06 | 4.80153e-06 | 4.95293e-06 | 5.11622e-06 | 5.29274e-06 |
| 1.00000e-05 | 4.66082e-06 | 4.80154e-06 | 4.95294e-06 | 5.11623e-06 | 5.29275e-06 |
| 1.00000e-06 | 4.66083e-06 | 4.80155e-06 | 4.95294e-06 | 5.11623e-06 | 5.29275e-06 |
| 1.00000e-07 | 4.66083e-06 | 4.80155e-06 | 4.95294e-06 | 5.11623e-06 | 5.29275e-06 |
| 1.00000e-08 | 4.66083e-06 | 4.80155e-06 | 4.95294e-06 | 5.11623e-06 | 5.29275e-06 |
| 1.00000e-09 | 4.66083e-06 | 4.80155e-06 | 4.95294e-06 | 5.11623e-06 | 5.29275e-06 |

| Pa\K        | 170.000     | 180.000     | 190.000     | 200.000     | 210.000     |
|-------------|-------------|-------------|-------------|-------------|-------------|
| 1.00000e+08 | 4.71630e-19 | 6.30488e-19 | 8.46633e-19 | 1.14351e-18 | 1.55511e-18 |
| 1.00000e+07 | 4.58615e-17 | 5.89031e-17 | 7.61192e-17 | 9.91311e-17 | 1.30315e-16 |
| 1.00000e+06 | 2.66490e-15 | 3.76592e-15 | 5.43091e-15 | 7.99948e-15 | 1.20388e-14 |
| 100000.     | 1.93154e-12 | 2.81247e-12 | 4.11400e-12 | 6.05109e-12 | 8.95334e-12 |
| 10000.0     | 1.00421e-09 | 1.35227e-09 | 1.81987e-09 | 2.44970e-09 | 3.29980e-09 |
| 1000.00     | 1.16684e-07 | 1.44313e-07 | 1.78023e-07 | 2.19115e-07 | 2.69110e-07 |
| 100.000     | 2.15978e-06 | 2.37825e-06 | 2.60989e-06 | 2.85607e-06 | 3.11832e-06 |
| 10.0000     | 4.34353e-06 | 4.55568e-06 | 4.78582e-06 | 5.03622e-06 | 5.30924e-06 |
| 1.00000     | 5.33837e-06 | 5.55811e-06 | 5.79452e-06 | 6.04960e-06 | 6.32538e-06 |
| 0.100000    | 5.47525e-06 | 5.68328e-06 | 5.90927e-06 | 6.15504e-06 | 6.42251e-06 |
| 0.0100000   | 5.48313e-06 | 5.69071e-06 | 5.91630e-06 | 6.16171e-06 | 6.42885e-06 |
| 0.00100000  | 5.48390e-06 | 5.69143e-06 | 5.91699e-06 | 6.16236e-06 | 6.42947e-06 |
| 0.000100000 | 5.48397e-06 | 5.69151e-06 | 5.91706e-06 | 6.16243e-06 | 6.42953e-06 |
| 1.00000e-05 | 5.48398e-06 | 5.69151e-06 | 5.91706e-06 | 6.16243e-06 | 6.42954e-06 |
| 1.00000e-06 | 5.48398e-06 | 5.69151e-06 | 5.91707e-06 | 6.16243e-06 | 6.42954e-06 |
| 1.00000e-07 | 5.48398e-06 | 5.69151e-06 | 5.91707e-06 | 6.16243e-06 | 6.42954e-06 |
| 1.00000e-08 | 5.48398e-06 | 5.69151e-06 | 5.91707e-06 | 6.16243e-06 | 6.42954e-06 |
| 1.00000e-09 | 5.48398e-06 | 5.69151e-06 | 5.91707e-06 | 6.16243e-06 | 6.42954e-06 |

| Pa\K        | 220.000     | 230.000     | 240.000     | 250.000     | 260.000     |
|-------------|-------------|-------------|-------------|-------------|-------------|
| 1.00000e+08 | 2.13108e-18 | 2.94433e-18 | 4.10267e-18 | 5.76662e-18 | 8.17652e-18 |
| 1.00000e+07 | 1.73244e-16 | 2.33480e-16 | 3.20078e-16 | 4.48551e-16 | 6.46772e-16 |
| 1.00000e+06 | 1.85083e-14 | 2.90505e-14 | 4.65082e-14 | 7.58421e-14 | 1.25754e-13 |
| 100000.     | 1.33267e-11 | 1.99476e-11 | 3.00049e-11 | 4.53145e-11 | 6.86351e-11 |
| 10000.0     | 4.44899e-09 | 6.00377e-09 | 8.10747e-09 | 1.09517e-08 | 1.47909e-08 |
| 1000.00     | 3.29781e-07 | 4.03154e-07 | 4.91523e-07 | 5.97452e-07 | 7.23771e-07 |
| 100.000     | 3.39825e-06 | 3.69766e-06 | 4.01846e-06 | 4.36279e-06 | 4.73297e-06 |
| 10.0000     | 5.60732e-06 | 5.93295e-06 | 6.28872e-06 | 6.67723e-06 | 7.10116e-06 |
| 1.00000     | 6.62401e-06 | 6.94771e-06 | 7.29880e-06 | 7.67970e-06 | 8.09291e-06 |
| 0.100000    | 6.71370e-06 | 7.03074e-06 | 7.37586e-06 | 7.75136e-06 | 8.15972e-06 |
| 0.0100000   | 6.71974e-06 | 7.03649e-06 | 7.38134e-06 | 7.75662e-06 | 8.16475e-06 |
| 0.00100000  | 6.72033e-06 | 7.03706e-06 | 7.38188e-06 | 7.75713e-06 | 8.16524e-06 |
| 0.000100000 | 6.72039e-06 | 7.03711e-06 | 7.38193e-06 | 7.75719e-06 | 8.16529e-06 |
| 1.00000e-05 | 6.72039e-06 | 7.03712e-06 | 7.38194e-06 | 7.75719e-06 | 8.16529e-06 |
| 1.00000e-06 | 6.72039e-06 | 7.03712e-06 | 7.38194e-06 | 7.75719e-06 | 8.16530e-06 |
| 1.00000e-07 | 6.72039e-06 | 7.03712e-06 | 7.38194e-06 | 7.75719e-06 | 8.16530e-06 |
| 1.00000e-08 | 6.72039e-06 | 7.03712e-06 | 7.38194e-06 | 7.75719e-06 | 8.16530e-06 |
| 1.00000e-09 | 6.72039e-06 | 7.03712e-06 | 7.38194e-06 | 7.75719e-06 | 8.16530e-06 |

| Pa\K | 270.000 | 280.000 | 290.000 | 300.000 | 310.000 |
|------|---------|---------|---------|---------|---------|
|------|---------|---------|---------|---------|---------|

|             |             |             |             |             |             |
|-------------|-------------|-------------|-------------|-------------|-------------|
| 1.00000e+08 | 1.16943e-17 | 1.68659e-17 | 2.45133e-17 | 1.63244e-13 | 5.26963e-17 |
| 1.00000e+07 | 9.66383e-16 | 1.50353e-15 | 2.43313e-15 | 4.36713e-12 | 6.87442e-15 |
| 1.00000e+06 | 2.11502e-13 | 3.59645e-13 | 6.15716e-13 | 4.72086e-11 | 1.80372e-12 |
| 100000.     | 1.04131e-10 | 1.58031e-10 | 2.39547e-10 | 3.20413e-09 | 5.44869e-10 |
| 10000.0     | 1.99601e-08 | 2.68954e-08 | 3.61585e-08 | 1.70822e-07 | 6.46885e-08 |
| 1000.00     | 8.73566e-07 | 1.05016e-06 | 1.25709e-06 | 2.51310e-06 | 1.77670e-06 |
| 100.000     | 5.13156e-06 | 5.56138e-06 | 6.02550e-06 | 7.25328e-06 | 7.06935e-06 |
| 10.0000     | 7.56321e-06 | 8.06612e-06 | 8.61265e-06 | 9.66419e-06 | 9.84615e-06 |
| 1.00000     | 8.54104e-06 | 9.02681e-06 | 9.55302e-06 | 1.04124e-05 | 1.07369e-05 |
| 0.100000    | 8.60346e-06 | 9.08526e-06 | 9.60787e-06 | 1.04575e-05 | 1.07854e-05 |
| 0.0100000   | 8.60828e-06 | 9.08987e-06 | 9.61228e-06 | 1.04611e-05 | 1.07895e-05 |
| 0.00100000  | 8.60875e-06 | 9.09033e-06 | 9.61272e-06 | 1.04614e-05 | 1.07899e-05 |
| 0.000100000 | 8.60880e-06 | 9.09037e-06 | 9.61276e-06 | 1.04615e-05 | 1.07899e-05 |
| 1.00000e-05 | 8.60880e-06 | 9.09038e-06 | 9.61277e-06 | 1.04615e-05 | 1.07899e-05 |
| 1.00000e-06 | 8.60880e-06 | 9.09038e-06 | 9.61277e-06 | 1.04615e-05 | 1.07899e-05 |
| 1.00000e-07 | 8.60880e-06 | 9.09038e-06 | 9.61277e-06 | 1.04615e-05 | 1.07899e-05 |
| 1.00000e-08 | 8.60880e-06 | 9.09038e-06 | 9.61277e-06 | 1.04615e-05 | 1.07899e-05 |
| 1.00000e-09 | 8.60880e-06 | 9.09038e-06 | 9.61277e-06 | 1.04615e-05 | 1.07899e-05 |

| Pa\K        | 400.000     | 500.000     | 600.000     | 700.000     | 800.000     |
|-------------|-------------|-------------|-------------|-------------|-------------|
| 1.00000e+08 | 6.97740e-08 | 2.58585e-05 | 0.000156263 | 0.000327303 | 0.000285722 |
| 1.00000e+07 | 2.41648e-08 | 8.80078e-06 | 0.000289795 | 0.00117178  | 0.00152896  |
| 1.00000e+06 | 1.61133e-08 | 2.40590e-06 | 0.000110663 | 0.000771650 | 0.00165723  |
| 100000.     | 1.36865e-07 | 3.81107e-06 | 6.08370e-05 | 0.000344155 | 0.000883043 |
| 10000.0     | 1.90995e-06 | 1.29918e-05 | 5.79177e-05 | 0.000176887 | 0.000406611 |
| 1000.00     | 9.18721e-06 | 2.54806e-05 | 5.96400e-05 | 0.000121180 | 0.000220822 |
| 100.000     | 1.58369e-05 | 3.39611e-05 | 6.60171e-05 | 0.000115253 | 0.000185056 |
| 10.0000     | 1.90115e-05 | 3.68861e-05 | 6.74577e-05 | 0.000114606 | 0.000181011 |
| 1.00000     | 1.94823e-05 | 3.71043e-05 | 6.75044e-05 | 0.000114489 | 0.000180599 |
| 0.100000    | 1.95073e-05 | 3.71170e-05 | 6.75062e-05 | 0.000114476 | 0.000180558 |
| 0.0100000   | 1.95095e-05 | 3.71181e-05 | 6.75064e-05 | 0.000114475 | 0.000180553 |
| 0.00100000  | 1.95098e-05 | 3.71182e-05 | 6.75064e-05 | 0.000114475 | 0.000180553 |
| 0.000100000 | 1.95098e-05 | 3.71182e-05 | 6.75064e-05 | 0.000114475 | 0.000180553 |
| 1.00000e-05 | 1.95098e-05 | 3.71182e-05 | 6.75064e-05 | 0.000114475 | 0.000180553 |
| 1.00000e-06 | 1.95098e-05 | 3.71182e-05 | 6.75064e-05 | 0.000114475 | 0.000180553 |
| 1.00000e-07 | 1.95098e-05 | 3.71182e-05 | 6.75064e-05 | 0.000114475 | 0.000180553 |
| 1.00000e-08 | 1.95098e-05 | 3.71182e-05 | 6.75064e-05 | 0.000114475 | 0.000180553 |
| 1.00000e-09 | 1.95098e-05 | 3.71182e-05 | 6.75064e-05 | 0.000114475 | 0.000180553 |

| Pa\K        | 900.000     | 1000.00     | 1100.00     | 1200.00     | 1300.00     |
|-------------|-------------|-------------|-------------|-------------|-------------|
| 1.00000e+08 | 0.000135635 | 7.73699e-05 | 6.14094e-05 | 5.65226e-05 | 5.49255e-05 |
| 1.00000e+07 | 0.00112991  | 0.000801525 | 0.000672134 | 0.000622498 | 0.000599689 |
| 1.00000e+06 | 0.00211313  | 0.00218836  | 0.00213002  | 0.00205154  | 0.00197332  |
| 100000.     | 0.00158561  | 0.00207430  | 0.00220472  | 0.00215686  | 0.00205288  |
| 10000.0     | 0.000805597 | 0.00119948  | 0.00133116  | 0.00131558  | 0.00128868  |
| 1000.00     | 0.000378754 | 0.000555539 | 0.000670039 | 0.000765102 | 0.000883048 |
| 100.000     | 0.000279160 | 0.000393380 | 0.000517938 | 0.000657725 | 0.000816643 |
| 10.0000     | 0.000267995 | 0.000375247 | 0.000501583 | 0.000646868 | 0.000810353 |
| 1.00000     | 0.000266947 | 0.000373591 | 0.000500103 | 0.000645896 | 0.000809803 |
| 0.100000    | 0.000266845 | 0.000373436 | 0.000499967 | 0.000645807 | 0.000809751 |
| 0.0100000   | 0.000266835 | 0.000373421 | 0.000499953 | 0.000645799 | 0.000809751 |
| 0.00100000  | 0.000266834 | 0.000373419 | 0.000499952 | 0.000645798 | 0.000809751 |
| 0.000100000 | 0.000266834 | 0.000373419 | 0.000499952 | 0.000645798 | 0.000809751 |
| 1.00000e-05 | 0.000266834 | 0.000373419 | 0.000499952 | 0.000645798 | 0.000809751 |
| 1.00000e-06 | 0.000266834 | 0.000373419 | 0.000499952 | 0.000645798 | 0.000809751 |
| 1.00000e-07 | 0.000266834 | 0.000373419 | 0.000499952 | 0.000645798 | 0.000809751 |
| 1.00000e-08 | 0.000266834 | 0.000373419 | 0.000499952 | 0.000645798 | 0.000809751 |
| 1.00000e-09 | 0.000266834 | 0.000373419 | 0.000499952 | 0.000645798 | 0.000809751 |

| Pa\K        | 1400.00     | 1500.00     | 1750.00    | 2000.00    | 2250.00    |
|-------------|-------------|-------------|------------|------------|------------|
| 1.00000e+08 | 5.42857e-05 | 5.37887e-05 | 0.00495784 | 0.00495173 | 0.00484293 |
| 1.00000e+07 | 0.000584403 | 0.000570394 | 0.00793383 | 0.00727520 | 0.00640924 |
| 1.00000e+06 | 0.00189812  | 0.00182839  | 0.00759974 | 0.00609200 | 0.00481495 |
| 100000.     | 0.00194984  | 0.00187484  | 0.00441858 | 0.00340792 | 0.00296773 |
| 10000.0     | 0.00130513  | 0.00137330  | 0.00219303 | 0.00227589 | 0.00245160 |
| 1000.00     | 0.00103100  | 0.00120139  | 0.00170894 | 0.00209830 | 0.00238639 |
| 100.000     | 0.000992951 | 0.00118095  | 0.00165337 | 0.00207994 | 0.00238002 |
| 10.0000     | 0.000989580 | 0.00117927  | 0.00164791 | 0.00207817 | 0.00237942 |
| 1.00000     | 0.000989292 | 0.00117913  | 0.00164738 | 0.00207800 | 0.00237936 |
| 0.100000    | 0.000989264 | 0.00117912  | 0.00164733 | 0.00207798 | 0.00237935 |
| 0.0100000   | 0.000989264 | 0.00117912  | 0.00164732 | 0.00207798 | 0.00237935 |
| 0.00100000  | 0.000989264 | 0.00117912  | 0.00164732 | 0.00207798 | 0.00237935 |
| 0.000100000 | 0.000989264 | 0.00117912  | 0.00164732 | 0.00207798 | 0.00237935 |
| 1.00000e-05 | 0.000989264 | 0.00117912  | 0.00164732 | 0.00207798 | 0.00237935 |
| 1.00000e-06 | 0.000989264 | 0.00117912  | 0.00164732 | 0.00207798 | 0.00237935 |
| 1.00000e-07 | 0.000989264 | 0.00117912  | 0.00164732 | 0.00207798 | 0.00237935 |
| 1.00000e-08 | 0.000989264 | 0.00117912  | 0.00164732 | 0.00207798 | 0.00237935 |

1.00000e-09 | 0.000989264 0.00117912 0.00164732 0.00207798 0.00237935

rad12

=====

| Pa\K        | 20.0000     | 30.0000     | 40.0000     | 50.0000     | 60.0000     |
|-------------|-------------|-------------|-------------|-------------|-------------|
| 1.00000e+08 | 5.24808e-10 | 3.43812e-09 | 9.35759e-09 | 1.82901e-08 | 3.01237e-08 |
| 1.00000e+07 | 1.39531e-07 | 5.01796e-07 | 9.18334e-07 | 1.31936e-06 | 1.68023e-06 |
| 1.00000e+06 | 2.64415e-06 | 2.66325e-06 | 2.31717e-06 | 2.03045e-06 | 1.81032e-06 |
| 100000.     | 1.02139e-06 | 5.35911e-07 | 3.61112e-07 | 2.74563e-07 | 2.23754e-07 |
| 10000.0     | 1.08312e-07 | 5.94559e-08 | 4.39227e-08 | 3.61408e-08 | 3.14078e-08 |
| 1000.00     | 1.93666e-08 | 1.32235e-08 | 1.09460e-08 | 9.69042e-09 | 8.86807e-09 |
| 100.000     | 6.40673e-09 | 4.63769e-09 | 3.72136e-09 | 3.09599e-09 | 2.62336e-09 |
| 10.0000     | 1.18563e-09 | 3.18826e-10 | 1.07151e-10 | 4.16113e-11 | 1.79791e-11 |
| 1.00000     | 5.30273e-13 | 6.34946e-15 | 3.88538e-16 | 5.14693e-17 | 1.07153e-17 |
| 0.100000    | 4.53160e-20 | 2.60508e-22 | 1.61896e-23 | 2.49786e-24 | 6.24167e-25 |
| 0.0100000   | 4.97009e-27 | 7.10528e-29 | 7.69324e-30 | 1.78920e-30 | 6.24571e-31 |
| 0.00100000  | 1.27502e-34 | 4.62091e-34 | 8.16587e-35 | 2.65811e-35 | 1.20265e-35 |
| 0.000100000 | 4.92745e-37 | 3.49320e-38 | 8.85772e-39 | 3.69921e-39 | 2.02967e-39 |
| 1.00000e-05 | 1.39743e-40 | 1.65965e-41 | 5.61498e-42 | 2.89139e-42 | 1.88476e-42 |
| 1.00000e-06 | 2.18442e-43 | 5.15333e-44 | 2.80103e-44 | 2.09722e-44 | 1.87049e-44 |
| 1.00000e-07 | 4.64410e-45 | 2.19800e-45 | 1.59459e-45 | 1.39780e-45 | 1.37642e-45 |
| 1.00000e-08 | 3.97080e-46 | 2.04615e-46 | 1.52362e-46 | 1.35290e-46 | 1.34263e-46 |
| 1.00000e-09 | 3.91743e-47 | 2.03275e-47 | 1.51709e-47 | 1.34867e-47 | 1.33940e-47 |

| Pa\K        | 70.0000     | 80.0000     | 90.0000     | 100.000     | 110.000     |
|-------------|-------------|-------------|-------------|-------------|-------------|
| 1.00000e+08 | 4.47500e-08 | 6.20998e-08 | 8.21509e-08 | 1.04930e-07 | 1.30513e-07 |
| 1.00000e+07 | 1.99512e-06 | 2.26600e-06 | 2.49772e-06 | 2.69589e-06 | 2.86595e-06 |
| 1.00000e+06 | 1.63800e-06 | 1.49932e-06 | 1.38498e-06 | 1.28880e-06 | 1.20657e-06 |
| 100000.     | 1.90543e-07 | 1.67184e-07 | 1.49867e-07 | 1.36515e-07 | 1.25906e-07 |
| 10000.0     | 2.81987e-08 | 2.58664e-08 | 2.40878e-08 | 2.26832e-08 | 2.15443e-08 |
| 1000.00     | 8.27397e-09 | 7.81652e-09 | 7.44810e-09 | 7.14126e-09 | 6.87892e-09 |
| 100.000     | 2.24740e-09 | 1.93910e-09 | 1.68123e-09 | 1.46258e-09 | 1.27532e-09 |
| 10.0000     | 8.44311e-12 | 4.24074e-12 | 2.25198e-12 | 1.25351e-12 | 7.26550e-13 |
| 1.00000     | 3.00217e-18 | 1.03758e-18 | 4.19269e-19 | 1.91230e-19 | 9.60879e-20 |
| 0.100000    | 2.10911e-25 | 8.77566e-26 | 4.25450e-26 | 2.31962e-26 | 1.38844e-26 |
| 0.0100000   | 2.80774e-31 | 1.50074e-31 | 9.10228e-32 | 6.08281e-32 | 4.39175e-32 |
| 0.00100000  | 6.69502e-36 | 4.30087e-36 | 3.07034e-36 | 2.37853e-36 | 1.96808e-36 |
| 0.000100000 | 1.32511e-39 | 9.76688e-40 | 7.87876e-40 | 6.82086e-40 | 6.25519e-40 |
| 1.00000e-05 | 1.43356e-42 | 1.21833e-42 | 1.12789e-42 | 1.11953e-42 | 1.17925e-42 |
| 1.00000e-06 | 1.86637e-44 | 2.01594e-44 | 2.31265e-44 | 2.78473e-44 | 3.49302e-44 |
| 1.00000e-07 | 1.46945e-45 | 1.66657e-45 | 1.98314e-45 | 2.45644e-45 | 3.15075e-45 |
| 1.00000e-08 | 1.44091e-46 | 1.64040e-46 | 1.95760e-46 | 2.43022e-46 | 3.12268e-46 |
| 1.00000e-09 | 1.43815e-47 | 1.63785e-47 | 1.95510e-47 | 2.42764e-47 | 3.11989e-47 |

| Pa\K        | 120.000     | 130.000     | 140.000     | 150.000     | 160.000     |
|-------------|-------------|-------------|-------------|-------------|-------------|
| 1.00000e+08 | 1.59033e-07 | 1.90680e-07 | 2.25711e-07 | 2.64460e-07 | 3.07348e-07 |
| 1.00000e+07 | 3.01285e-06 | 3.14093e-06 | 3.25391e-06 | 3.35499e-06 | 3.44688e-06 |
| 1.00000e+06 | 1.13536e-06 | 1.07300e-06 | 1.01790e-06 | 9.68848e-07 | 9.24901e-07 |
| 100000.     | 1.17272e-07 | 1.10112e-07 | 1.04080e-07 | 9.89345e-08 | 9.44980e-08 |
| 10000.0     | 2.06018e-08 | 1.98091e-08 | 1.91338e-08 | 1.85526e-08 | 1.80486e-08 |
| 1000.00     | 6.64980e-09 | 6.44611e-09 | 6.26222e-09 | 6.09398e-09 | 5.93815e-09 |
| 100.000     | 1.11377e-09 | 9.73599e-10 | 8.51465e-10 | 7.44700e-10 | 6.51147e-10 |
| 10.0000     | 4.36237e-13 | 2.70204e-13 | 1.72069e-13 | 1.12342e-13 | 7.50237e-14 |
| 1.00000     | 5.22702e-20 | 3.03879e-20 | 1.86956e-20 | 1.20799e-20 | 8.14805e-21 |
| 0.100000    | 8.96945e-27 | 6.17606e-27 | 4.49056e-27 | 3.42328e-27 | 2.72120e-27 |
| 0.0100000   | 3.37924e-32 | 2.74409e-32 | 2.33495e-32 | 2.07117e-32 | 1.90855e-32 |
| 0.00100000  | 1.72046e-36 | 1.57678e-36 | 1.50698e-36 | 1.49701e-36 | 1.54407e-36 |
| 0.000100000 | 6.02237e-40 | 6.04906e-40 | 6.31091e-40 | 6.81918e-40 | 7.62061e-40 |
| 1.00000e-05 | 1.30909e-42 | 1.52420e-42 | 1.85504e-42 | 2.35416e-42 | 3.10954e-42 |
| 1.00000e-06 | 4.54114e-44 | 6.09777e-44 | 8.43689e-44 | 1.20084e-43 | 1.75628e-43 |
| 1.00000e-07 | 4.17014e-45 | 5.68164e-45 | 7.95552e-45 | 1.14356e-44 | 1.68628e-44 |
| 1.00000e-08 | 4.13897e-46 | 5.64590e-46 | 7.91334e-46 | 1.13844e-45 | 1.67991e-45 |
| 1.00000e-09 | 4.13587e-47 | 5.64234e-47 | 7.90912e-47 | 1.13793e-46 | 1.67927e-46 |

| Pa\K        | 170.000     | 180.000     | 190.000     | 200.000     | 210.000     |
|-------------|-------------|-------------|-------------|-------------|-------------|
| 1.00000e+08 | 3.54896e-07 | 4.07746e-07 | 4.66684e-07 | 5.32668e-07 | 6.06868e-07 |
| 1.00000e+07 | 3.53187e-06 | 3.61192e-06 | 3.68868e-06 | 3.76355e-06 | 3.83771e-06 |
| 1.00000e+06 | 8.85311e-07 | 8.49482e-07 | 8.16929e-07 | 7.87256e-07 | 7.60134e-07 |
| 100000.     | 9.06393e-08 | 8.72592e-08 | 8.42808e-08 | 8.16441e-08 | 7.93018e-08 |
| 10000.0     | 1.76085e-08 | 1.72226e-08 | 1.68831e-08 | 1.65839e-08 | 1.63204e-08 |
| 1000.00     | 5.79220e-09 | 5.65411e-09 | 5.52222e-09 | 5.39511e-09 | 5.27166e-09 |
| 100.000     | 5.69039e-10 | 4.96905e-10 | 4.33509e-10 | 3.77799e-10 | 3.28871e-10 |
| 10.0000     | 5.11482e-14 | 3.55409e-14 | 2.51363e-14 | 1.80738e-14 | 1.31998e-14 |
| 1.00000     | 5.71004e-21 | 4.14141e-21 | 3.09911e-21 | 2.38686e-21 | 1.88825e-21 |
| 0.100000    | 2.24614e-27 | 1.91921e-27 | 1.69401e-27 | 1.54321e-27 | 1.45211e-27 |
| 0.0100000   | 1.82380e-32 | 1.80847e-32 | 1.86938e-32 | 2.03826e-32 | 2.40161e-32 |

|             |             |             |             |             |             |
|-------------|-------------|-------------|-------------|-------------|-------------|
| 0.00100000  | 1.65739e-36 | 1.86649e-36 | 2.24706e-36 | 2.99576e-36 | 4.65183e-36 |
| 0.000100000 | 8.81119e-40 | 1.05749e-39 | 1.32846e-39 | 1.77790e-39 | 2.61730e-39 |
| 1.00000e-05 | 4.26908e-42 | 6.08554e-42 | 9.00062e-42 | 1.38070e-41 | 2.19716e-41 |
| 1.00000e-06 | 2.63752e-43 | 4.06552e-43 | 6.43102e-43 | 1.04399e-42 | 1.73960e-42 |
| 1.00000e-07 | 2.54981e-44 | 3.95290e-44 | 6.28294e-44 | 1.02406e-43 | 1.71209e-43 |
| 1.00000e-08 | 2.54170e-45 | 3.94232e-45 | 6.26883e-45 | 1.02213e-44 | 1.70940e-44 |
| 1.00000e-09 | 2.54088e-46 | 3.94125e-46 | 6.26740e-46 | 1.02193e-45 | 1.70912e-45 |

| Pa\K        | 220.000     | 230.000     | 240.000     | 250.000     | 260.000     |
|-------------|-------------|-------------|-------------|-------------|-------------|
| 1.00000e+08 | 6.90723e-07 | 7.86009e-07 | 8.94937e-07 | 1.02029e-06 | 1.16555e-06 |
| 1.00000e+07 | 3.91219e-06 | 3.98782e-06 | 4.06536e-06 | 4.14536e-06 | 4.22834e-06 |
| 1.00000e+06 | 7.35293e-07 | 7.12503e-07 | 6.91574e-07 | 6.72346e-07 | 6.54683e-07 |
| 100000.     | 7.72159e-08 | 7.53561e-08 | 7.36977e-08 | 7.22210e-08 | 7.09101e-08 |
| 10000.0     | 1.60886e-08 | 1.58854e-08 | 1.57086e-08 | 1.55561e-08 | 1.54267e-08 |
| 1000.00     | 5.15088e-09 | 5.03195e-09 | 4.91421e-09 | 4.79711e-09 | 4.68022e-09 |
| 100.000     | 2.85944e-10 | 2.48327e-10 | 2.15419e-10 | 1.86682e-10 | 1.61634e-10 |
| 10.0000     | 9.78384e-15 | 7.35542e-15 | 5.60589e-15 | 4.32970e-15 | 3.38789e-15 |
| 1.00000     | 1.53204e-21 | 1.27342e-21 | 1.08359e-21 | 9.43747e-22 | 8.41690e-22 |
| 0.100000    | 1.41635e-27 | 1.44396e-27 | 1.56403e-27 | 1.84969e-27 | 2.47565e-27 |
| 0.0100000   | 3.18445e-32 | 4.98701e-32 | 9.47137e-32 | 2.14072e-31 | 5.49086e-31 |
| 0.00100000  | 8.77671e-36 | 2.01069e-35 | 5.35772e-35 | 1.57803e-34 | 4.95176e-34 |
| 0.000100000 | 4.43751e-39 | 9.02802e-39 | 2.21452e-38 | 6.31511e-38 | 1.99358e-37 |
| 1.00000e-05 | 3.63114e-41 | 6.24922e-41 | 1.12614e-40 | 2.14599e-40 | 4.39312e-40 |
| 1.00000e-06 | 2.97630e-42 | 5.23085e-42 | 9.44901e-42 | 1.75560e-41 | 3.35810e-41 |
| 1.00000e-07 | 2.93730e-43 | 5.17373e-43 | 9.36132e-43 | 1.74108e-42 | 3.33072e-42 |
| 1.00000e-08 | 2.93345e-44 | 5.16809e-44 | 9.35278e-44 | 1.73973e-43 | 3.32841e-43 |
| 1.00000e-09 | 2.93306e-45 | 5.16751e-45 | 9.35191e-45 | 1.73959e-44 | 3.32818e-44 |

| Pa\K        | 270.000     | 280.000     | 290.000     | 300.000     | 310.000     |
|-------------|-------------|-------------|-------------|-------------|-------------|
| 1.00000e+08 | 1.33519e-06 | 1.53486e-06 | 1.77156e-06 | 4.37817e-06 | 2.39035e-06 |
| 1.00000e+07 | 4.31466e-06 | 4.40451e-06 | 4.49799e-06 | 4.97057e-06 | 4.69445e-06 |
| 1.00000e+06 | 6.38473e-07 | 6.23620e-07 | 6.10044e-07 | 6.02517e-07 | 5.86402e-07 |
| 100000.     | 6.97523e-08 | 6.87377e-08 | 6.78588e-08 | 7.69575e-08 | 6.64789e-08 |
| 10000.0     | 1.53191e-08 | 1.52326e-08 | 1.51670e-08 | 2.01254e-08 | 1.50959e-08 |
| 1000.00     | 4.56320e-09 | 4.44588e-09 | 4.32812e-09 | 5.63417e-09 | 4.09080e-09 |
| 100.000     | 1.39849e-10 | 1.20941e-10 | 1.04565e-10 | 1.46119e-10 | 7.81935e-11 |
| 10.0000     | 2.68526e-15 | 2.15573e-15 | 1.75289e-15 | 2.27386e-14 | 1.20464e-15 |
| 1.00000     | 7.69834e-22 | 7.24326e-22 | 7.05062e-22 | 5.06972e-19 | 7.72106e-22 |
| 0.100000    | 3.86171e-27 | 7.03524e-27 | 1.45565e-26 | 7.26137e-23 | 7.86018e-26 |
| 0.0100000   | 1.52811e-30 | 4.47721e-30 | 1.35604e-29 | 1.21895e-25 | 1.31593e-28 |
| 0.00100000  | 1.61921e-33 | 5.44428e-33 | 1.86517e-32 | 4.20152e-28 | 2.25130e-31 |
| 0.000100000 | 6.70541e-37 | 2.34556e-36 | 8.40684e-36 | 1.04931e-29 | 1.11866e-34 |
| 1.00000e-05 | 9.86353e-40 | 2.47676e-39 | 7.00626e-39 | 9.87255e-31 | 7.53441e-38 |
| 1.00000e-06 | 6.62105e-41 | 1.34805e-40 | 2.84189e-40 | 9.83376e-32 | 1.42818e-39 |
| 1.00000e-07 | 6.55844e-42 | 1.33023e-41 | 2.78138e-41 | 9.82801e-33 | 1.33665e-40 |
| 1.00000e-08 | 6.55396e-43 | 1.32917e-42 | 2.77822e-42 | 9.82711e-34 | 1.33211e-41 |
| 1.00000e-09 | 6.55354e-44 | 1.32907e-43 | 2.77793e-43 | 9.82701e-35 | 1.33171e-42 |

| Pa\K        | 400.000     | 500.000     | 600.000     | 700.000     | 800.000     |
|-------------|-------------|-------------|-------------|-------------|-------------|
| 1.00000e+08 | 4.07339e-05 | 0.000164457 | 0.000337569 | 0.00110084  | 0.00402226  |
| 1.00000e+07 | 7.14669e-06 | 1.16850e-05 | 2.74299e-05 | 8.97824e-05 | 0.000383091 |
| 1.00000e+06 | 6.55032e-07 | 1.10993e-06 | 3.33856e-06 | 1.28021e-05 | 5.58391e-05 |
| 100000.     | 9.70854e-08 | 1.90287e-07 | 6.21410e-07 | 2.84728e-06 | 1.73205e-05 |
| 10000.0     | 2.60744e-08 | 4.59242e-08 | 1.28535e-07 | 6.65010e-07 | 5.24601e-06 |
| 1000.00     | 4.81490e-09 | 5.42081e-09 | 1.28225e-08 | 8.46524e-08 | 9.29160e-07 |
| 100.000     | 6.34552e-11 | 6.17408e-11 | 2.19093e-10 | 3.60812e-09 | 8.36716e-08 |
| 10.0000     | 1.60770e-14 | 5.76455e-14 | 1.03895e-12 | 1.50707e-10 | 7.02754e-09 |
| 1.00000     | 4.14102e-18 | 2.71181e-16 | 2.12362e-14 | 1.22295e-11 | 6.69869e-10 |
| 0.100000    | 3.45598e-20 | 7.19335e-18 | 1.53847e-15 | 1.18620e-12 | 6.63784e-11 |
| 0.0100000   | 4.44611e-22 | 1.48468e-19 | 1.41506e-16 | 1.18063e-13 | 6.62666e-12 |
| 0.00100000  | 2.22583e-24 | 2.74486e-21 | 1.38850e-17 | 1.17968e-14 | 6.62447e-13 |
| 0.000100000 | 2.32912e-26 | 1.89164e-22 | 1.38552e-18 | 1.17951e-15 | 6.62400e-14 |
| 1.00000e-05 | 1.91220e-27 | 1.85421e-23 | 1.38524e-19 | 1.17947e-16 | 6.62388e-15 |
| 1.00000e-06 | 1.89647e-28 | 1.85163e-24 | 1.38519e-20 | 1.17946e-17 | 6.62386e-16 |
| 1.00000e-07 | 1.89524e-29 | 1.85138e-25 | 1.38519e-21 | 1.17945e-18 | 6.62385e-17 |
| 1.00000e-08 | 1.89512e-30 | 1.85136e-26 | 1.38518e-22 | 1.17945e-19 | 6.62385e-18 |
| 1.00000e-09 | 1.89510e-31 | 1.85135e-27 | 1.38518e-23 | 1.17945e-20 | 6.62385e-19 |

| Pa\K        | 900.000     | 1000.00     | 1100.00     | 1200.00     | 1300.00     |
|-------------|-------------|-------------|-------------|-------------|-------------|
| 1.00000e+08 | 0.00725631  | 0.00769961  | 0.00743426  | 0.00709075  | 0.00675235  |
| 1.00000e+07 | 0.00165920  | 0.00362441  | 0.00465960  | 0.00489558  | 0.00480166  |
| 1.00000e+06 | 0.000232638 | 0.000719582 | 0.00118950  | 0.00138500  | 0.00140753  |
| 100000.     | 6.71119e-05 | 0.000148925 | 0.000222930 | 0.000256835 | 0.000260296 |
| 10000.0     | 2.07494e-05 | 3.78778e-05 | 4.77299e-05 | 4.94773e-05 | 4.58589e-05 |
| 1000.00     | 3.92057e-06 | 6.60459e-06 | 7.33822e-06 | 6.79523e-06 | 5.74582e-06 |
| 100.000     | 4.28085e-07 | 7.35604e-07 | 7.94636e-07 | 7.14066e-07 | 5.90789e-07 |

|             |             |             |             |             |             |
|-------------|-------------|-------------|-------------|-------------|-------------|
| 10.0000     | 4.12303e-08 | 7.32307e-08 | 7.95646e-08 | 7.14605e-08 | 5.90569e-08 |
| 1.00000     | 4.06291e-09 | 7.28932e-09 | 7.94303e-09 | 7.13946e-09 | 5.90163e-09 |
| 0.100000    | 4.04919e-10 | 7.28028e-10 | 7.93900e-10 | 7.13749e-10 | 5.90052e-10 |
| 0.0100000   | 4.04631e-11 | 7.27823e-11 | 7.93806e-11 | 7.13704e-11 | 5.90028e-11 |
| 0.00100000  | 4.04569e-12 | 7.27778e-12 | 7.93785e-12 | 7.13693e-12 | 5.90022e-12 |
| 0.000100000 | 4.04554e-13 | 7.27767e-13 | 7.93780e-13 | 7.13691e-13 | 5.90021e-13 |
| 1.00000e-05 | 4.04550e-14 | 7.27764e-14 | 7.93779e-14 | 7.13690e-14 | 5.90021e-14 |
| 1.00000e-06 | 4.04549e-15 | 7.27764e-15 | 7.93778e-15 | 7.13690e-15 | 5.90020e-15 |
| 1.00000e-07 | 4.04549e-16 | 7.27764e-16 | 7.93778e-16 | 7.13690e-16 | 5.90020e-16 |
| 1.00000e-08 | 4.04549e-17 | 7.27764e-17 | 7.93778e-17 | 7.13690e-17 | 5.90020e-17 |
| 1.00000e-09 | 4.04549e-18 | 7.27764e-18 | 7.93778e-18 | 7.13690e-18 | 5.90020e-18 |

| Pa\K        | 1400.00     | 1500.00     | 1750.00     | 2000.00     | 2250.00     |
|-------------|-------------|-------------|-------------|-------------|-------------|
| 1.00000e+08 | 0.00642624  | 0.00611805  | 0.000493932 | 0.000454494 | 0.000417138 |
| 1.00000e+07 | 0.00458930  | 0.00434001  | 0.000192940 | 0.000183688 | 0.000168403 |
| 1.00000e+06 | 0.00135599  | 0.00127598  | 7.78453e-05 | 6.98119e-05 | 5.55108e-05 |
| 100000.     | 0.000247265 | 0.000225867 | 2.39705e-05 | 1.63842e-05 | 1.01395e-05 |
| 10000.0     | 3.97943e-05 | 3.31761e-05 | 3.84331e-06 | 2.13940e-06 | 1.16835e-06 |
| 1000.00     | 4.63804e-06 | 3.65894e-06 | 4.20319e-07 | 2.22075e-07 | 1.18486e-07 |
| 100.000     | 4.70128e-07 | 3.67582e-07 | 4.24081e-08 | 2.22686e-08 | 1.18539e-08 |
| 10.0000     | 4.69590e-08 | 3.67012e-08 | 4.24324e-09 | 2.22700e-09 | 1.18527e-09 |
| 1.00000     | 4.69317e-09 | 3.66826e-09 | 4.24325e-10 | 2.22694e-10 | 1.18523e-10 |
| 0.100000    | 4.69250e-10 | 3.66783e-10 | 4.24320e-11 | 2.22692e-11 | 1.18522e-11 |
| 0.0100000   | 4.69235e-11 | 3.66775e-11 | 4.24319e-12 | 2.22691e-12 | 1.18522e-12 |
| 0.00100000  | 4.69232e-12 | 3.66773e-12 | 4.24318e-13 | 2.22691e-13 | 1.18522e-13 |
| 0.000100000 | 4.69231e-13 | 3.66772e-13 | 4.24318e-14 | 2.22691e-14 | 1.18522e-14 |
| 1.00000e-05 | 4.69231e-14 | 3.66772e-14 | 4.24318e-15 | 2.22691e-15 | 1.18522e-15 |
| 1.00000e-06 | 4.69231e-15 | 3.66772e-15 | 4.24318e-16 | 2.22691e-16 | 1.18522e-16 |
| 1.00000e-07 | 4.69231e-16 | 3.66772e-16 | 4.24318e-17 | 2.22691e-17 | 1.18522e-17 |
| 1.00000e-08 | 4.69231e-17 | 3.66772e-17 | 4.24318e-18 | 2.22691e-18 | 1.18522e-18 |
| 1.00000e-09 | 4.69231e-18 | 3.66772e-18 | 4.24318e-19 | 2.22691e-19 | 1.18522e-19 |

rad8

====

| Pa\K        | 20.0000     | 30.0000     | 40.0000     | 50.0000     | 60.0000     |
|-------------|-------------|-------------|-------------|-------------|-------------|
| 1.00000e+08 | 0.00108078  | 0.00155322  | 0.00177324  | 0.00188556  | 0.00194425  |
| 1.00000e+07 | 0.00180782  | 0.00136210  | 0.00100771  | 0.000751671 | 0.000566650 |
| 1.00000e+06 | 0.000106734 | 5.65426e-06 | 4.57762e-07 | 5.09505e-08 | 7.26416e-09 |
| 100000.     | 7.41529e-13 | 8.18636e-18 | 6.65317e-21 | 4.40130e-23 | 9.92104e-25 |
| 10000.0     | 1.15682e-30 | 1.34925e-35 | 5.25172e-38 | 1.71119e-39 | 1.65372e-40 |
| 1000.00     | 5.55843e-44 | 3.20655e-46 | 3.66801e-47 | 1.10284e-47 | 5.30004e-48 |
| 100.000     | 1.33959e-49 | 1.49564e-50 | 5.77732e-51 | 3.47493e-51 | 2.62186e-51 |
| 10.0000     | 1.93505e-52 | 2.87230e-53 | 9.57113e-54 | 4.63962e-54 | 2.82574e-54 |
| 1.00000     | 1.12034e-55 | 2.20798e-56 | 1.48016e-56 | 1.29253e-56 | 1.26502e-56 |
| 0.100000    | 1.94460e-57 | 4.13880e-58 | 1.43887e-58 | 6.65510e-59 | 3.74141e-59 |
| 0.0100000   | 1.05736e-60 | 1.53863e-61 | 1.02405e-61 | 9.24480e-62 | 9.56307e-62 |
| 0.00100000  | 2.41530e-62 | 1.27010e-62 | 9.77103e-63 | 9.05773e-63 | 9.44471e-63 |
| 0.000100000 | 2.40476e-63 | 1.26743e-63 | 9.75719e-64 | 9.04795e-64 | 9.43643e-64 |
| 1.00000e-05 | 2.40375e-64 | 1.26717e-64 | 9.75581e-65 | 9.04698e-65 | 9.43560e-65 |
| 1.00000e-06 | 2.40365e-65 | 1.26714e-65 | 9.75567e-66 | 9.04688e-66 | 9.43552e-66 |
| 1.00000e-07 | 2.40364e-66 | 1.26714e-66 | 9.75566e-67 | 9.04687e-67 | 9.43551e-67 |
| 1.00000e-08 | 2.40363e-67 | 1.26714e-67 | 9.75566e-68 | 9.04687e-68 | 9.43551e-68 |
| 1.00000e-09 | 2.40363e-68 | 1.26714e-68 | 9.75566e-69 | 9.04687e-69 | 9.43551e-69 |

| Pa\K        | 70.0000     | 80.0000     | 90.0000     | 100.000     | 110.000     |
|-------------|-------------|-------------|-------------|-------------|-------------|
| 1.00000e+08 | 0.00197335  | 0.00198493  | 0.00198560  | 0.00197925  | 0.00196827  |
| 1.00000e+07 | 0.000431474 | 0.000331513 | 0.000256748 | 0.000200251 | 0.000157164 |
| 1.00000e+06 | 1.26321e-09 | 2.58608e-10 | 6.07045e-11 | 1.60116e-11 | 4.67098e-12 |
| 100000.     | 4.96304e-26 | 4.33089e-27 | 5.68779e-28 | 1.02089e-28 | 2.34420e-29 |
| 10000.0     | 3.07510e-41 | 8.81873e-42 | 3.43172e-42 | 1.67231e-42 | 9.67649e-43 |
| 1000.00     | 3.35041e-48 | 2.53318e-48 | 2.17277e-48 | 2.04736e-48 | 2.07584e-48 |
| 100.000     | 2.26917e-51 | 2.15340e-51 | 2.18404e-51 | 2.33047e-51 | 2.58960e-51 |
| 10.0000     | 2.01557e-54 | 1.62020e-54 | 1.43491e-54 | 1.38042e-54 | 1.42859e-54 |
| 1.00000     | 1.32547e-56 | 1.45552e-56 | 1.65526e-56 | 1.93526e-56 | 2.31514e-56 |
| 0.100000    | 2.43263e-59 | 1.77645e-59 | 1.43184e-59 | 1.26087e-59 | 1.20596e-59 |
| 0.0100000   | 1.07856e-61 | 1.29465e-61 | 1.63089e-61 | 2.13704e-61 | 2.89589e-61 |
| 0.00100000  | 1.06882e-62 | 1.28527e-62 | 1.62088e-62 | 2.12557e-62 | 2.88199e-62 |
| 0.000100000 | 1.06802e-63 | 1.28444e-63 | 1.61995e-63 | 2.12448e-63 | 2.88065e-63 |
| 1.00000e-05 | 1.06794e-64 | 1.28436e-64 | 1.61986e-64 | 2.12437e-64 | 2.88052e-64 |
| 1.00000e-06 | 1.06794e-65 | 1.28435e-65 | 1.61985e-65 | 2.12436e-65 | 2.88051e-65 |
| 1.00000e-07 | 1.06794e-66 | 1.28435e-66 | 1.61985e-66 | 2.12436e-66 | 2.88050e-66 |
| 1.00000e-08 | 1.06794e-67 | 1.28435e-67 | 1.61985e-67 | 2.12436e-67 | 2.88050e-67 |
| 1.00000e-09 | 1.06794e-68 | 1.28435e-68 | 1.61985e-68 | 2.12436e-68 | 2.88050e-68 |

| Pa\K        | 120.000    | 130.000    | 140.000    | 150.000    | 160.000    |
|-------------|------------|------------|------------|------------|------------|
| 1.00000e+08 | 0.00195422 | 0.00193814 | 0.00192073 | 0.00190249 | 0.00188378 |

|             |             |             |             |             |             |
|-------------|-------------|-------------|-------------|-------------|-------------|
| 1.00000e+07 | 0.000124033 | 9.83686e-05 | 7.83561e-05 | 6.26573e-05 | 5.02759e-05 |
| 1.00000e+06 | 1.48819e-12 | 5.12553e-13 | 1.89228e-13 | 7.43634e-14 | 3.09246e-14 |
| 100000.     | 6.56971e-30 | 2.17088e-30 | 8.24083e-31 | 3.52289e-31 | 1.66991e-31 |
| 10000.0     | 6.40904e-43 | 4.73416e-43 | 3.82704e-43 | 3.33872e-43 | 3.11051e-43 |
| 1000.00     | 2.23310e-48 | 2.52372e-48 | 2.97498e-48 | 3.63844e-48 | 4.59801e-48 |
| 100.000     | 2.97594e-51 | 3.51977e-51 | 4.26969e-51 | 5.29871e-51 | 6.71468e-51 |
| 10.0000     | 1.57848e-54 | 1.84981e-54 | 2.28484e-54 | 2.95680e-54 | 3.98637e-54 |
| 1.00000     | 2.82482e-56 | 3.50772e-56 | 4.42601e-56 | 5.66877e-56 | 7.36445e-56 |
| 0.100000    | 1.24801e-59 | 1.39257e-59 | 1.66817e-59 | 2.13328e-59 | 2.89314e-59 |
| 0.0100000   | 4.04198e-61 | 5.79471e-61 | 8.51577e-61 | 1.28101e-60 | 1.97048e-60 |
| 0.00100000  | 4.02439e-62 | 5.77159e-62 | 8.48437e-62 | 1.27662e-61 | 1.96416e-61 |
| 0.000100000 | 4.02268e-63 | 5.76932e-63 | 8.48127e-63 | 1.27618e-62 | 1.96353e-62 |
| 1.00000e-05 | 4.02251e-64 | 5.76909e-64 | 8.48096e-64 | 1.27614e-63 | 1.96347e-63 |
| 1.00000e-06 | 4.02249e-65 | 5.76907e-65 | 8.48093e-65 | 1.27613e-64 | 1.96347e-64 |
| 1.00000e-07 | 4.02249e-66 | 5.76906e-66 | 8.48093e-66 | 1.27613e-65 | 1.96346e-65 |
| 1.00000e-08 | 4.02249e-67 | 5.76906e-67 | 8.48093e-67 | 1.27613e-66 | 1.96346e-66 |
| 1.00000e-09 | 4.02249e-68 | 5.76906e-68 | 8.48093e-68 | 1.27613e-67 | 1.96346e-67 |

| Pa\K        | 170.000     | 180.000     | 190.000     | 200.000     | 210.000     |
|-------------|-------------|-------------|-------------|-------------|-------------|
| 1.00000e+08 | 0.00186484  | 0.00184582  | 0.00182687  | 0.00180801  | 0.00178931  |
| 1.00000e+07 | 4.04634e-05 | 3.26527e-05 | 2.64113e-05 | 2.14065e-05 | 1.73809e-05 |
| 1.00000e+06 | 1.35414e-14 | 6.21731e-15 | 2.98235e-15 | 1.49004e-15 | 7.73350e-16 |
| 100000.     | 8.67145e-32 | 4.88658e-32 | 2.96711e-32 | 1.93156e-32 | 1.34441e-32 |
| 10000.0     | 3.07002e-43 | 3.19030e-43 | 3.47403e-43 | 3.94958e-43 | 4.67501e-43 |
| 1000.00     | 5.98507e-48 | 8.00416e-48 | 1.09754e-47 | 1.54049e-47 | 2.21015e-47 |
| 100.000     | 8.67682e-51 | 1.14218e-50 | 1.53049e-50 | 2.08655e-50 | 2.89333e-50 |
| 10.0000     | 5.57069e-54 | 8.03311e-54 | 1.19090e-53 | 1.80948e-53 | 2.81094e-53 |
| 1.00000     | 9.69980e-56 | 1.29492e-55 | 1.75203e-55 | 2.40257e-55 | 3.33989e-55 |
| 0.100000    | 4.13221e-59 | 6.17486e-59 | 9.59891e-59 | 1.54508e-58 | 2.56610e-58 |
| 0.0100000   | 3.09729e-60 | 4.97262e-60 | 8.15210e-60 | 1.36457e-59 | 2.33232e-59 |
| 0.00100000  | 3.08796e-61 | 4.95850e-61 | 8.13021e-61 | 1.36111e-60 | 2.32668e-60 |
| 0.000100000 | 3.08703e-62 | 4.95709e-62 | 8.12803e-62 | 1.36076e-61 | 2.32612e-61 |
| 1.00000e-05 | 3.08694e-63 | 4.95695e-63 | 8.12781e-63 | 1.36072e-62 | 2.32606e-62 |
| 1.00000e-06 | 3.08693e-64 | 4.95694e-64 | 8.12779e-64 | 1.36072e-63 | 2.32606e-63 |
| 1.00000e-07 | 3.08693e-65 | 4.95693e-65 | 8.12778e-65 | 1.36072e-64 | 2.32606e-64 |
| 1.00000e-08 | 3.08693e-66 | 4.95693e-66 | 8.12778e-66 | 1.36072e-65 | 2.32606e-65 |
| 1.00000e-09 | 3.08693e-67 | 4.95693e-67 | 8.12778e-67 | 1.36072e-66 | 2.32606e-66 |

| Pa\K        | 220.000     | 230.000     | 240.000     | 250.000     | 260.000     |
|-------------|-------------|-------------|-------------|-------------|-------------|
| 1.00000e+08 | 0.00177073  | 0.00175228  | 0.00173391  | 0.00171556  | 0.00169720  |
| 1.00000e+07 | 1.41342e-05 | 1.15095e-05 | 9.38336e-06 | 7.65811e-06 | 6.25610e-06 |
| 1.00000e+06 | 4.16033e-16 | 2.31544e-16 | 1.33110e-16 | 7.89410e-17 | 4.82485e-17 |
| 100000.     | 1.00049e-32 | 7.98905e-33 | 6.90232e-33 | 6.54277e-33 | 6.93152e-33 |
| 10000.0     | 5.75036e-43 | 7.34270e-43 | 9.73532e-43 | 1.34283e-42 | 1.93604e-42 |
| 1000.00     | 3.23747e-47 | 4.83723e-47 | 7.36642e-47 | 1.14266e-46 | 1.80462e-46 |
| 100.000     | 4.08009e-50 | 5.85121e-50 | 8.53460e-50 | 1.26647e-49 | 1.91266e-49 |
| 10.0000     | 4.45593e-53 | 7.19731e-53 | 1.18324e-52 | 1.97833e-52 | 3.36212e-52 |
| 1.00000     | 4.70799e-55 | 6.73233e-55 | 9.77135e-55 | 1.44041e-54 | 2.15827e-54 |
| 0.100000    | 4.38593e-58 | 7.70077e-58 | 1.38735e-57 | 2.56289e-57 | 4.85327e-57 |
| 0.0100000   | 4.07114e-59 | 7.25937e-59 | 1.32280e-58 | 2.46430e-58 | 4.69589e-58 |
| 0.00100000  | 4.06177e-60 | 7.24343e-60 | 1.32002e-59 | 2.45935e-59 | 4.68687e-59 |
| 0.000100000 | 4.06083e-61 | 7.24185e-61 | 1.31974e-60 | 2.45886e-60 | 4.68596e-60 |
| 1.00000e-05 | 4.06074e-62 | 7.24169e-62 | 1.31972e-61 | 2.45881e-61 | 4.68587e-61 |
| 1.00000e-06 | 4.06073e-63 | 7.24168e-63 | 1.31971e-62 | 2.45880e-62 | 4.68586e-62 |
| 1.00000e-07 | 4.06073e-64 | 7.24167e-64 | 1.31971e-63 | 2.45880e-63 | 4.68586e-63 |
| 1.00000e-08 | 4.06073e-65 | 7.24167e-65 | 1.31971e-64 | 2.45880e-64 | 4.68586e-64 |
| 1.00000e-09 | 4.06073e-66 | 7.24167e-66 | 1.31971e-65 | 2.45880e-65 | 4.68586e-65 |

| Pa\K        | 270.000     | 280.000     | 290.000     | 300.000     | 310.000     |
|-------------|-------------|-------------|-------------|-------------|-------------|
| 1.00000e+08 | 0.00167872  | 0.00166008  | 0.00164118  | 0.00162077  | 0.00160211  |
| 1.00000e+07 | 5.11540e-06 | 4.18633e-06 | 3.42902e-06 | 2.39656e-06 | 2.30679e-06 |
| 1.00000e+06 | 3.03708e-17 | 1.96820e-17 | 1.31327e-17 | 2.39868e-15 | 6.40213e-18 |
| 100000.     | 8.35729e-33 | 1.15763e-32 | 1.83283e-32 | 7.72721e-26 | 6.36919e-32 |
| 10000.0     | 2.94373e-42 | 4.79041e-42 | 8.51800e-42 | 2.31148e-32 | 3.81400e-41 |
| 1000.00     | 2.90096e-46 | 4.74620e-46 | 7.90457e-46 | 5.13118e-36 | 2.31975e-45 |
| 100.000     | 2.94123e-49 | 4.60818e-49 | 7.36125e-49 | 2.52947e-38 | 1.99783e-48 |
| 10.0000     | 5.80602e-52 | 1.01866e-51 | 1.81581e-51 | 5.66644e-40 | 6.05492e-51 |
| 1.00000     | 3.29025e-54 | 5.10927e-54 | 8.09292e-54 | 3.35007e-41 | 2.17063e-53 |
| 0.100000    | 9.42101e-57 | 1.87505e-56 | 3.82774e-56 | 3.07179e-42 | 1.72484e-55 |
| 0.0100000   | 9.15840e-58 | 1.82925e-57 | 3.74435e-57 | 3.04477e-43 | 1.69330e-56 |
| 0.00100000  | 9.14155e-59 | 1.82602e-58 | 3.73798e-58 | 3.04207e-44 | 1.69061e-57 |
| 0.000100000 | 9.13986e-60 | 1.82569e-59 | 3.73734e-59 | 3.04180e-45 | 1.69034e-58 |
| 1.00000e-05 | 9.13969e-61 | 1.82566e-60 | 3.73728e-60 | 3.04177e-46 | 1.69031e-59 |
| 1.00000e-06 | 9.13967e-62 | 1.82566e-61 | 3.73727e-61 | 3.04177e-47 | 1.69031e-60 |
| 1.00000e-07 | 9.13967e-63 | 1.82566e-62 | 3.73727e-62 | 3.04177e-48 | 1.69031e-61 |
| 1.00000e-08 | 9.13967e-64 | 1.82566e-63 | 3.73727e-63 | 3.04177e-49 | 1.69031e-62 |
| 1.00000e-09 | 9.13967e-65 | 1.82566e-64 | 3.73727e-64 | 3.04177e-50 | 1.69031e-63 |

| Pa\K        | 400.000     | 500.000     | 600.000     | 700.000     | 800.000     |
|-------------|-------------|-------------|-------------|-------------|-------------|
| 1.00000e+08 | 0.00115653  | 0.000866323 | 0.000619502 | 0.000515231 | 0.000680934 |
| 1.00000e+07 | 5.63492e-07 | 2.49303e-07 | 2.79962e-07 | 7.85509e-07 | 5.53380e-06 |
| 1.00000e+06 | 1.52871e-15 | 3.35604e-14 | 9.99821e-13 | 2.65263e-11 | 3.04965e-09 |
| 100000.     | 1.10311e-23 | 1.53133e-20 | 7.45264e-18 | 3.10693e-15 | 6.65842e-12 |
| 10000.0     | 1.66240e-29 | 1.78490e-25 | 8.11054e-22 | 8.11504e-18 | 1.06096e-13 |
| 1000.00     | 4.41200e-33 | 7.40459e-29 | 2.10855e-24 | 1.66173e-19 | 4.53648e-15 |
| 100.000     | 3.15881e-35 | 5.38841e-31 | 4.97891e-26 | 8.10666e-21 | 3.04241e-16 |
| 10.0000     | 1.02198e-36 | 2.11915e-32 | 2.87996e-27 | 5.94030e-22 | 2.54873e-17 |
| 1.00000     | 7.07654e-38 | 1.63020e-33 | 2.45492e-28 | 5.41769e-23 | 2.41809e-18 |
| 0.100000    | 6.69364e-39 | 1.56978e-34 | 2.39998e-29 | 5.34859e-24 | 2.40054e-19 |
| 0.0100000   | 6.65445e-40 | 1.56356e-35 | 2.39430e-30 | 5.34142e-25 | 2.39871e-20 |
| 0.00100000  | 6.65052e-41 | 1.56293e-36 | 2.39372e-31 | 5.34071e-26 | 2.39853e-21 |
| 0.000100000 | 6.65013e-42 | 1.56287e-37 | 2.39366e-32 | 5.34064e-27 | 2.39851e-22 |
| 1.00000e-05 | 6.65009e-43 | 1.56286e-38 | 2.39366e-33 | 5.34063e-28 | 2.39851e-23 |
| 1.00000e-06 | 6.65008e-44 | 1.56286e-39 | 2.39366e-34 | 5.34063e-29 | 2.39851e-24 |
| 1.00000e-07 | 6.65008e-45 | 1.56286e-40 | 2.39366e-35 | 5.34063e-30 | 2.39851e-25 |
| 1.00000e-08 | 6.65008e-46 | 1.56286e-41 | 2.39366e-36 | 5.34063e-31 | 2.39851e-26 |
| 1.00000e-09 | 6.65008e-47 | 1.56286e-42 | 2.39366e-37 | 5.34063e-32 | 2.39851e-27 |

| Pa\K        | 900.000     | 1000.00     | 1100.00     | 1200.00     | 1300.00     |
|-------------|-------------|-------------|-------------|-------------|-------------|
| 1.00000e+08 | 0.00123727  | 0.00232063  | 0.00375344  | 0.00520622  | 0.00637449  |
| 1.00000e+07 | 4.05344e-05 | 0.000181377 | 0.000408014 | 0.000613494 | 0.000776403 |
| 1.00000e+06 | 2.35150e-07 | 4.43850e-06 | 2.12511e-05 | 4.43425e-05 | 6.31967e-05 |
| 100000.     | 3.16515e-09 | 1.59260e-07 | 1.25781e-06 | 3.33659e-06 | 5.26514e-06 |
| 10000.0     | 1.21586e-10 | 9.67780e-09 | 9.67529e-08 | 2.88664e-07 | 4.79807e-07 |
| 1000.00     | 7.75412e-12 | 7.61085e-10 | 8.50145e-09 | 2.68671e-08 | 4.58492e-08 |
| 100.000     | 6.24417e-13 | 6.75737e-11 | 7.96640e-10 | 2.59211e-09 | 4.48372e-09 |
| 10.0000     | 5.65903e-14 | 6.39464e-12 | 7.72816e-11 | 2.54936e-10 | 4.43803e-10 |
| 1.00000     | 5.49697e-15 | 6.29239e-13 | 7.66106e-12 | 2.53747e-11 | 4.42555e-11 |
| 0.100000    | 5.47523e-16 | 6.27875e-14 | 7.65219e-13 | 2.53591e-12 | 4.42393e-12 |
| 0.0100000   | 5.47297e-17 | 6.27733e-15 | 7.65127e-14 | 2.53575e-13 | 4.42376e-13 |
| 0.00100000  | 5.47274e-18 | 6.27719e-16 | 7.65117e-15 | 2.53574e-14 | 4.42375e-14 |
| 0.000100000 | 5.47272e-19 | 6.27717e-17 | 7.65117e-16 | 2.53574e-15 | 4.42375e-15 |
| 1.00000e-05 | 5.47271e-20 | 6.27717e-18 | 7.65117e-17 | 2.53574e-16 | 4.42375e-16 |
| 1.00000e-06 | 5.47271e-21 | 6.27717e-19 | 7.65117e-18 | 2.53574e-17 | 4.42375e-17 |
| 1.00000e-07 | 5.47271e-22 | 6.27717e-20 | 7.65117e-19 | 2.53574e-18 | 4.42375e-18 |
| 1.00000e-08 | 5.47271e-23 | 6.27717e-21 | 7.65117e-20 | 2.53574e-19 | 4.42375e-19 |
| 1.00000e-09 | 5.47271e-24 | 6.27717e-22 | 7.65117e-21 | 2.53574e-20 | 4.42375e-20 |

| Pa\K        | 1400.00     | 1500.00     | 1750.00     | 2000.00     | 2250.00     |
|-------------|-------------|-------------|-------------|-------------|-------------|
| 1.00000e+08 | 0.00716687  | 0.00765395  | 0.00124628  | 0.00123524  | 0.00119059  |
| 1.00000e+07 | 0.000880469 | 0.000929206 | 0.000203241 | 0.000184909 | 0.000164806 |
| 1.00000e+06 | 7.44470e-05 | 7.91212e-05 | 2.13083e-05 | 1.87339e-05 | 1.62860e-05 |
| 100000.     | 6.46445e-06 | 6.99037e-06 | 2.05760e-06 | 1.80781e-06 | 1.57222e-06 |
| 10000.0     | 6.02301e-07 | 6.57951e-07 | 2.01099e-07 | 1.77327e-07 | 1.54518e-07 |
| 1000.00     | 5.82178e-08 | 6.39330e-08 | 1.99118e-08 | 1.75818e-08 | 1.53287e-08 |
| 100.000     | 5.72632e-09 | 6.30472e-09 | 1.98197e-09 | 1.75071e-09 | 1.52658e-09 |
| 10.0000     | 5.68336e-10 | 6.26495e-10 | 1.97791e-10 | 1.74746e-10 | 1.52390e-10 |
| 1.00000     | 5.67183e-11 | 6.25447e-11 | 1.97722e-11 | 1.74693e-11 | 1.52347e-11 |
| 0.100000    | 5.67036e-12 | 6.25315e-12 | 1.97714e-12 | 1.74687e-12 | 1.52343e-12 |
| 0.0100000   | 5.67021e-13 | 6.25301e-13 | 1.97714e-13 | 1.74686e-13 | 1.52342e-13 |
| 0.00100000  | 5.67019e-14 | 6.25300e-14 | 1.97714e-14 | 1.74686e-14 | 1.52342e-14 |
| 0.000100000 | 5.67019e-15 | 6.25299e-15 | 1.97714e-15 | 1.74686e-15 | 1.52342e-15 |
| 1.00000e-05 | 5.67019e-16 | 6.25299e-16 | 1.97714e-16 | 1.74686e-16 | 1.52342e-16 |
| 1.00000e-06 | 5.67019e-17 | 6.25299e-17 | 1.97714e-17 | 1.74686e-17 | 1.52342e-17 |
| 1.00000e-07 | 5.67019e-18 | 6.25299e-18 | 1.97714e-18 | 1.74686e-18 | 1.52342e-18 |
| 1.00000e-08 | 5.67019e-19 | 6.25299e-19 | 1.97714e-19 | 1.74686e-19 | 1.52342e-19 |
| 1.00000e-09 | 5.67019e-20 | 6.25299e-20 | 1.97714e-20 | 1.74686e-20 | 1.52342e-20 |

rad67

====

| Pa\K        | 20.0000     | 30.0000     | 40.0000     | 50.0000     | 60.0000     |
|-------------|-------------|-------------|-------------|-------------|-------------|
| 1.00000e+08 | 1.36482e-22 | 2.03398e-21 | 9.20806e-21 | 2.64346e-20 | 5.97657e-20 |
| 1.00000e+07 | 6.48437e-19 | 6.77685e-18 | 2.48405e-17 | 6.16942e-17 | 1.25231e-16 |
| 1.00000e+06 | 9.90347e-16 | 8.13057e-15 | 2.65805e-14 | 6.11511e-14 | 1.16907e-13 |
| 100000.     | 7.43396e-13 | 4.52007e-12 | 1.17762e-11 | 2.24454e-11 | 3.64701e-11 |
| 10000.0     | 1.26224e-10 | 3.86873e-10 | 6.84868e-10 | 1.00860e-09 | 1.35773e-09 |
| 1000.00     | 2.79382e-09 | 5.99019e-09 | 9.22662e-09 | 1.25909e-08 | 1.61327e-08 |
| 100.000     | 2.94078e-08 | 5.72747e-08 | 8.30963e-08 | 1.07898e-07 | 1.32167e-07 |
| 10.0000     | 1.99187e-07 | 2.91059e-07 | 3.44175e-07 | 3.82125e-07 | 4.12902e-07 |
| 1.00000     | 4.23997e-07 | 4.51993e-07 | 4.68713e-07 | 4.84347e-07 | 5.00218e-07 |
| 0.100000    | 4.66982e-07 | 4.74137e-07 | 4.83974e-07 | 4.96183e-07 | 5.10001e-07 |
| 0.0100000   | 4.71511e-07 | 4.76407e-07 | 4.85525e-07 | 4.97381e-07 | 5.10988e-07 |
| 0.00100000  | 4.71966e-07 | 4.76635e-07 | 4.85680e-07 | 4.97501e-07 | 5.11087e-07 |

|             |             |             |             |             |             |
|-------------|-------------|-------------|-------------|-------------|-------------|
| 0.000100000 | 4.72011e-07 | 4.76657e-07 | 4.85696e-07 | 4.97513e-07 | 5.11097e-07 |
| 1.00000e-05 | 4.72016e-07 | 4.76660e-07 | 4.85697e-07 | 4.97514e-07 | 5.11098e-07 |
| 1.00000e-06 | 4.72016e-07 | 4.76660e-07 | 4.85697e-07 | 4.97514e-07 | 5.11098e-07 |
| 1.00000e-07 | 4.72017e-07 | 4.76660e-07 | 4.85698e-07 | 4.97514e-07 | 5.11098e-07 |
| 1.00000e-08 | 4.72017e-07 | 4.76660e-07 | 4.85698e-07 | 4.97514e-07 | 5.11098e-07 |
| 1.00000e-09 | 4.72017e-07 | 4.76660e-07 | 4.85698e-07 | 4.97514e-07 | 5.11098e-07 |

| Pa\K        | 70.0000     | 80.0000     | 90.0000     | 100.000     | 110.000     |
|-------------|-------------|-------------|-------------|-------------|-------------|
| 1.00000e+08 | 1.16881e-19 | 2.07696e-19 | 3.45251e-19 | 5.46982e-19 | 8.36604e-19 |
| 1.00000e+07 | 2.25041e-16 | 3.73221e-16 | 5.85389e-16 | 8.82079e-16 | 1.29075e-15 |
| 1.00000e+06 | 1.99592e-13 | 3.16054e-13 | 4.74697e-13 | 6.86036e-13 | 9.63448e-13 |
| 100000.     | 5.38911e-11 | 7.48680e-11 | 9.96795e-11 | 1.28730e-10 | 1.62564e-10 |
| 10000.0     | 1.73499e-09 | 2.14467e-09 | 2.59216e-09 | 3.08395e-09 | 3.62784e-09 |
| 1000.00     | 1.98964e-08 | 2.39292e-08 | 2.82829e-08 | 3.30156e-08 | 3.81946e-08 |
| 100.000     | 1.56250e-07 | 1.80442e-07 | 2.05002e-07 | 2.30175e-07 | 2.56202e-07 |
| 10.0000     | 4.40031e-07 | 4.65360e-07 | 4.89974e-07 | 5.14584e-07 | 5.39712e-07 |
| 1.00000     | 5.16735e-07 | 5.34144e-07 | 5.52633e-07 | 5.72373e-07 | 5.93543e-07 |
| 0.100000    | 5.25148e-07 | 5.41576e-07 | 5.59329e-07 | 5.78497e-07 | 5.99209e-07 |
| 0.0100000   | 5.25996e-07 | 5.42325e-07 | 5.60003e-07 | 5.79112e-07 | 5.99778e-07 |
| 0.00100000  | 5.26080e-07 | 5.42400e-07 | 5.60070e-07 | 5.79174e-07 | 5.99835e-07 |
| 0.000100000 | 5.26089e-07 | 5.42407e-07 | 5.60077e-07 | 5.79180e-07 | 5.99841e-07 |
| 1.00000e-05 | 5.26090e-07 | 5.42408e-07 | 5.60078e-07 | 5.79181e-07 | 5.99841e-07 |
| 1.00000e-06 | 5.26090e-07 | 5.42408e-07 | 5.60078e-07 | 5.79181e-07 | 5.99841e-07 |
| 1.00000e-07 | 5.26090e-07 | 5.42408e-07 | 5.60078e-07 | 5.79181e-07 | 5.99841e-07 |
| 1.00000e-08 | 5.26090e-07 | 5.42408e-07 | 5.60078e-07 | 5.79181e-07 | 5.99841e-07 |
| 1.00000e-09 | 5.26090e-07 | 5.42408e-07 | 5.60078e-07 | 5.79181e-07 | 5.99841e-07 |

| Pa\K        | 120.000     | 130.000     | 140.000     | 150.000     | 160.000     |
|-------------|-------------|-------------|-------------|-------------|-------------|
| 1.00000e+08 | 1.24690e-18 | 1.82394e-18 | 2.63345e-18 | 3.77059e-18 | 5.37528e-18 |
| 1.00000e+07 | 1.84868e-15 | 2.60729e-15 | 3.63846e-15 | 5.04399e-15 | 6.96998e-15 |
| 1.00000e+06 | 1.32420e-12 | 1.79083e-12 | 2.39304e-12 | 3.17028e-12 | 4.17521e-12 |
| 100000.     | 2.01894e-10 | 2.47639e-10 | 3.00964e-10 | 3.63343e-10 | 4.36631e-10 |
| 10000.0     | 4.23331e-09 | 4.91195e-09 | 5.67791e-09 | 6.54861e-09 | 7.54535e-09 |
| 1000.00     | 4.38993e-08 | 5.02249e-08 | 5.72855e-08 | 6.52183e-08 | 7.41878e-08 |
| 100.000     | 2.83335e-07 | 3.11843e-07 | 3.42022e-07 | 3.74196e-07 | 4.08725e-07 |
| 10.0000     | 5.65785e-07 | 5.93188e-07 | 6.22292e-07 | 6.53476e-07 | 6.87135e-07 |
| 1.00000     | 6.16343e-07 | 6.41000e-07 | 6.67776e-07 | 6.96968e-07 | 7.28908e-07 |
| 0.100000    | 6.21635e-07 | 6.45982e-07 | 6.72497e-07 | 7.01467e-07 | 7.33216e-07 |
| 0.0100000   | 6.22166e-07 | 6.46482e-07 | 6.72971e-07 | 7.01918e-07 | 7.33648e-07 |
| 0.00100000  | 6.22219e-07 | 6.46532e-07 | 6.73018e-07 | 7.01963e-07 | 7.33692e-07 |
| 0.000100000 | 6.22225e-07 | 6.46537e-07 | 6.73023e-07 | 7.01968e-07 | 7.33696e-07 |
| 1.00000e-05 | 6.22225e-07 | 6.46538e-07 | 6.73023e-07 | 7.01968e-07 | 7.33696e-07 |
| 1.00000e-06 | 6.22225e-07 | 6.46538e-07 | 6.73023e-07 | 7.01968e-07 | 7.33696e-07 |
| 1.00000e-07 | 6.22225e-07 | 6.46538e-07 | 6.73023e-07 | 7.01968e-07 | 7.33696e-07 |
| 1.00000e-08 | 6.22225e-07 | 6.46538e-07 | 6.73023e-07 | 7.01968e-07 | 7.33696e-07 |
| 1.00000e-09 | 6.22225e-07 | 6.46538e-07 | 6.73023e-07 | 7.01968e-07 | 7.33696e-07 |

| Pa\K        | 170.000     | 180.000     | 190.000     | 200.000     | 210.000     |
|-------------|-------------|-------------|-------------|-------------|-------------|
| 1.00000e+08 | 7.65629e-18 | 1.09302e-17 | 1.56857e-17 | 2.26917e-17 | 3.31860e-17 |
| 1.00000e+07 | 9.62867e-15 | 1.33326e-14 | 1.85480e-14 | 2.59818e-14 | 3.67231e-14 |
| 1.00000e+06 | 5.47845e-12 | 7.17502e-12 | 9.39321e-12 | 1.23065e-11 | 1.61505e-11 |
| 100000.     | 5.23150e-10 | 6.25807e-10 | 7.48224e-10 | 8.94922e-10 | 1.07153e-09 |
| 10000.0     | 8.69428e-09 | 1.00274e-08 | 1.15839e-08 | 1.34118e-08 | 1.55699e-08 |
| 1000.00     | 8.43907e-08 | 9.60614e-08 | 1.09478e-07 | 1.24972e-07 | 1.42931e-07 |
| 100.000     | 4.46006e-07 | 4.86474e-07 | 5.30608e-07 | 5.78937e-07 | 6.32034e-07 |
| 10.0000     | 7.23685e-07 | 7.63575e-07 | 8.07293e-07 | 8.55363e-07 | 9.08358e-07 |
| 1.00000     | 7.63969e-07 | 8.02563e-07 | 8.45148e-07 | 8.92226e-07 | 9.44351e-07 |
| 0.100000    | 7.68113e-07 | 8.06564e-07 | 8.49025e-07 | 8.95995e-07 | 9.48024e-07 |
| 0.0100000   | 7.68529e-07 | 8.06966e-07 | 8.49414e-07 | 8.96372e-07 | 9.48392e-07 |
| 0.00100000  | 7.68570e-07 | 8.07006e-07 | 8.49453e-07 | 8.96409e-07 | 9.48429e-07 |
| 0.000100000 | 7.68574e-07 | 8.07010e-07 | 8.49457e-07 | 8.96413e-07 | 9.48433e-07 |
| 1.00000e-05 | 7.68575e-07 | 8.07010e-07 | 8.49457e-07 | 8.96414e-07 | 9.48433e-07 |
| 1.00000e-06 | 7.68575e-07 | 8.07010e-07 | 8.49457e-07 | 8.96414e-07 | 9.48433e-07 |
| 1.00000e-07 | 7.68575e-07 | 8.07010e-07 | 8.49457e-07 | 8.96414e-07 | 9.48433e-07 |
| 1.00000e-08 | 7.68575e-07 | 8.07010e-07 | 8.49457e-07 | 8.96414e-07 | 9.48433e-07 |
| 1.00000e-09 | 7.68575e-07 | 8.07010e-07 | 8.49457e-07 | 8.96414e-07 | 9.48433e-07 |

| Pa\K        | 220.000     | 230.000     | 240.000     | 250.000     | 260.000     |
|-------------|-------------|-------------|-------------|-------------|-------------|
| 1.00000e+08 | 4.92134e-17 | 7.42536e-17 | 1.14422e-16 | 1.80804e-16 | 2.93968e-16 |
| 1.00000e+07 | 5.24816e-14 | 7.59964e-14 | 1.11752e-13 | 1.67238e-13 | 2.55152e-13 |
| 1.00000e+06 | 2.12453e-11 | 2.80268e-11 | 3.70900e-11 | 4.92489e-11 | 6.56174e-11 |
| 100000.     | 1.28507e-09 | 1.54430e-09 | 1.86012e-09 | 2.24616e-09 | 2.71942e-09 |
| 10000.0     | 1.81301e-08 | 2.11806e-08 | 2.48295e-08 | 2.92093e-08 | 3.44820e-08 |
| 1000.00     | 1.63814e-07 | 1.88158e-07 | 2.16588e-07 | 2.49832e-07 | 2.88732e-07 |
| 100.000     | 6.90533e-07 | 7.55126e-07 | 8.26569e-07 | 9.05690e-07 | 9.93395e-07 |
| 10.0000     | 9.66901e-07 | 1.03167e-06 | 1.10341e-06 | 1.18294e-06 | 1.27115e-06 |



|             |             |             |             |             |             |
|-------------|-------------|-------------|-------------|-------------|-------------|
| 1.00000     | 1.00213e-06 | 1.06623e-06 | 1.13738e-06 | 1.21639e-06 | 1.30414e-06 |
| 0.100000    | 1.00572e-06 | 1.06975e-06 | 1.14083e-06 | 1.21979e-06 | 1.30748e-06 |
| 0.0100000   | 1.00608e-06 | 1.07010e-06 | 1.14118e-06 | 1.22013e-06 | 1.30782e-06 |
| 0.00100000  | 1.00612e-06 | 1.07013e-06 | 1.14121e-06 | 1.22016e-06 | 1.30785e-06 |
| 0.000100000 | 1.00612e-06 | 1.07014e-06 | 1.14122e-06 | 1.22017e-06 | 1.30785e-06 |
| 1.00000e-05 | 1.00612e-06 | 1.07014e-06 | 1.14122e-06 | 1.22017e-06 | 1.30786e-06 |
| 1.00000e-06 | 1.00612e-06 | 1.07014e-06 | 1.14122e-06 | 1.22017e-06 | 1.30786e-06 |
| 1.00000e-07 | 1.00612e-06 | 1.07014e-06 | 1.14122e-06 | 1.22017e-06 | 1.30786e-06 |
| 1.00000e-08 | 1.00612e-06 | 1.07014e-06 | 1.14122e-06 | 1.22017e-06 | 1.30786e-06 |
| 1.00000e-09 | 1.00612e-06 | 1.07014e-06 | 1.14122e-06 | 1.22017e-06 | 1.30786e-06 |

| Pa\K        | 270.000     | 280.000     | 290.000     | 300.000     | 310.000     |
|-------------|-------------|-------------|-------------|-------------|-------------|
| 1.00000e+08 | 4.92388e-16 | 8.47084e-16 | 1.48461e-15 | 2.25787e-12 | 4.58193e-15 |
| 1.00000e+07 | 3.97101e-13 | 6.29417e-13 | 1.01138e-12 | 9.35149e-11 | 2.63459e-12 |
| 1.00000e+06 | 8.77195e-11 | 1.17636e-10 | 1.58184e-10 | 1.14751e-09 | 2.87414e-10 |
| 100000.     | 3.30110e-09 | 4.01766e-09 | 4.90200e-09 | 1.48730e-08 | 7.34500e-09 |
| 10000.0     | 4.08464e-08 | 4.85447e-08 | 5.78719e-08 | 1.42668e-07 | 8.29009e-08 |
| 1000.00     | 3.34255e-07 | 3.87509e-07 | 4.49743e-07 | 7.89521e-07 | 6.06848e-07 |
| 100.000     | 1.09068e-06 | 1.19861e-06 | 1.31835e-06 | 1.56593e-06 | 1.59825e-06 |
| 10.0000     | 1.36900e-06 | 1.47755e-06 | 1.59796e-06 | 1.74670e-06 | 1.87914e-06 |
| 1.00000     | 1.40159e-06 | 1.50978e-06 | 1.62987e-06 | 1.76684e-06 | 1.91053e-06 |
| 0.100000    | 1.40488e-06 | 1.51304e-06 | 1.63310e-06 | 1.76886e-06 | 1.91369e-06 |
| 0.0100000   | 1.40521e-06 | 1.51336e-06 | 1.63342e-06 | 1.76907e-06 | 1.91401e-06 |
| 0.00100000  | 1.40524e-06 | 1.51340e-06 | 1.63346e-06 | 1.76909e-06 | 1.91404e-06 |
| 0.000100000 | 1.40525e-06 | 1.51340e-06 | 1.63346e-06 | 1.76909e-06 | 1.91404e-06 |
| 1.00000e-05 | 1.40525e-06 | 1.51340e-06 | 1.63346e-06 | 1.76909e-06 | 1.91404e-06 |
| 1.00000e-06 | 1.40525e-06 | 1.51340e-06 | 1.63346e-06 | 1.76909e-06 | 1.91404e-06 |
| 1.00000e-07 | 1.40525e-06 | 1.51340e-06 | 1.63346e-06 | 1.76909e-06 | 1.91404e-06 |
| 1.00000e-08 | 1.40525e-06 | 1.51340e-06 | 1.63346e-06 | 1.76909e-06 | 1.91404e-06 |
| 1.00000e-09 | 1.40525e-06 | 1.51340e-06 | 1.63346e-06 | 1.76909e-06 | 1.91404e-06 |

| Pa\K        | 400.000     | 500.000     | 600.000     | 700.000     | 800.000     |
|-------------|-------------|-------------|-------------|-------------|-------------|
| 1.00000e+08 | 1.33997e-07 | 4.15851e-05 | 0.000248912 | 0.000536401 | 0.000513174 |
| 1.00000e+07 | 6.94915e-08 | 1.66025e-05 | 0.000487523 | 0.00188448  | 0.00243911  |
| 1.00000e+06 | 4.46058e-08 | 4.14718e-06 | 0.000185871 | 0.00125394  | 0.00261517  |
| 100000.     | 1.79310e-07 | 4.20219e-06 | 7.92463e-05 | 0.000491556 | 0.00134804  |
| 10000.0     | 1.08182e-06 | 8.12136e-06 | 4.47737e-05 | 0.000166916 | 0.000482989 |
| 1000.00     | 3.08271e-06 | 1.02360e-05 | 2.88135e-05 | 7.25488e-05 | 0.000174862 |
| 100.000     | 4.05674e-06 | 1.05416e-05 | 2.57741e-05 | 5.79063e-05 | 0.000119860 |
| 10.0000     | 4.20438e-06 | 1.05780e-05 | 2.54402e-05 | 5.63368e-05 | 0.000113838 |
| 1.00000     | 4.21993e-06 | 1.05818e-05 | 2.54066e-05 | 5.61792e-05 | 0.000113240 |
| 0.100000    | 4.22150e-06 | 1.05822e-05 | 2.54032e-05 | 5.61635e-05 | 0.000113180 |
| 0.0100000   | 4.22165e-06 | 1.05822e-05 | 2.54030e-05 | 5.61619e-05 | 0.000113175 |
| 0.00100000  | 4.22167e-06 | 1.05822e-05 | 2.54029e-05 | 5.61618e-05 | 0.000113174 |
| 0.000100000 | 4.22167e-06 | 1.05822e-05 | 2.54029e-05 | 5.61618e-05 | 0.000113174 |
| 1.00000e-05 | 4.22167e-06 | 1.05822e-05 | 2.54029e-05 | 5.61618e-05 | 0.000113174 |
| 1.00000e-06 | 4.22167e-06 | 1.05822e-05 | 2.54029e-05 | 5.61618e-05 | 0.000113174 |
| 1.00000e-07 | 4.22167e-06 | 1.05822e-05 | 2.54029e-05 | 5.61618e-05 | 0.000113174 |
| 1.00000e-08 | 4.22167e-06 | 1.05822e-05 | 2.54029e-05 | 5.61618e-05 | 0.000113174 |
| 1.00000e-09 | 4.22167e-06 | 1.05822e-05 | 2.54029e-05 | 5.61618e-05 | 0.000113174 |

| Pa\K        | 900.000     | 1000.00     | 1100.00     | 1200.00     | 1300.00     |
|-------------|-------------|-------------|-------------|-------------|-------------|
| 1.00000e+08 | 0.000278173 | 0.000170298 | 0.000134876 | 0.000118610 | 0.000104276 |
| 1.00000e+07 | 0.00183952  | 0.00133513  | 0.00112542  | 0.00103524  | 0.000981912 |
| 1.00000e+06 | 0.00329213  | 0.00339961  | 0.00330290  | 0.00317581  | 0.00305100  |
| 100000.     | 0.00246646  | 0.00321973  | 0.00340909  | 0.00332849  | 0.00317089  |
| 10000.0     | 0.00112520  | 0.00175700  | 0.00195939  | 0.00193843  | 0.00191662  |
| 1000.00     | 0.000392740 | 0.000658715 | 0.000838630 | 0.00100828  | 0.00123337  |
| 100.000     | 0.000228646 | 0.000385974 | 0.000582108 | 0.000826774 | 0.00112097  |
| 10.0000     | 0.000210214 | 0.000355310 | 0.000554350 | 0.000808258 | 0.00111020  |
| 1.00000     | 0.000208445 | 0.000352460 | 0.000551800 | 0.000806583 | 0.00110924  |
| 0.100000    | 0.000208272 | 0.000352189 | 0.000551562 | 0.000806422 | 0.00110916  |
| 0.0100000   | 0.000208254 | 0.000352163 | 0.000551539 | 0.000806414 | 0.00110915  |
| 0.00100000  | 0.000208253 | 0.000352160 | 0.000551537 | 0.000806406 | 0.00110915  |
| 0.000100000 | 0.000208253 | 0.000352160 | 0.000551537 | 0.000806406 | 0.00110915  |
| 1.00000e-05 | 0.000208253 | 0.000352160 | 0.000551537 | 0.000806406 | 0.00110915  |
| 1.00000e-06 | 0.000208253 | 0.000352160 | 0.000551537 | 0.000806406 | 0.00110915  |
| 1.00000e-07 | 0.000208253 | 0.000352160 | 0.000551537 | 0.000806406 | 0.00110915  |
| 1.00000e-08 | 0.000208253 | 0.000352160 | 0.000551537 | 0.000806406 | 0.00110915  |
| 1.00000e-09 | 0.000208253 | 0.000352160 | 0.000551537 | 0.000806406 | 0.00110915  |

| Pa\K        | 1400.00     | 1500.00     | 1750.00    | 2000.00    | 2250.00    |
|-------------|-------------|-------------|------------|------------|------------|
| 1.00000e+08 | 8.76354e-05 | 7.31770e-05 | 0.00217571 | 0.00218834 | 0.00214304 |
| 1.00000e+07 | 0.000934635 | 0.000891607 | 0.00463494 | 0.00441189 | 0.00396883 |
| 1.00000e+06 | 0.00293185  | 0.00282205  | 0.00522213 | 0.00457530 | 0.00389447 |
| 100000.     | 0.00302325  | 0.00292164  | 0.00386564 | 0.00350872 | 0.00324694 |

|             |            |            |            |            |            |
|-------------|------------|------------|------------|------------|------------|
| 10000.0     | 0.00197528 | 0.00211674 | 0.00270065 | 0.00296428 | 0.00303089 |
| 1000.00     | 0.00151558 | 0.00183035 | 0.00242853 | 0.00287378 | 0.00300280 |
| 100.000     | 0.00145127 | 0.00179604 | 0.00239703 | 0.00286450 | 0.00300015 |
| 10.0000     | 0.00144549 | 0.00179319 | 0.00239397 | 0.00286362 | 0.00299991 |
| 1.00000     | 0.00144499 | 0.00179296 | 0.00239366 | 0.00286354 | 0.00299989 |
| 0.100000    | 0.00144495 | 0.00179294 | 0.00239364 | 0.00286353 | 0.00299989 |
| 0.0100000   | 0.00144494 | 0.00179294 | 0.00239363 | 0.00286353 | 0.00299989 |
| 0.00100000  | 0.00144494 | 0.00179294 | 0.00239363 | 0.00286353 | 0.00299989 |
| 0.000100000 | 0.00144494 | 0.00179294 | 0.00239363 | 0.00286353 | 0.00299989 |
| 1.00000e-05 | 0.00144494 | 0.00179294 | 0.00239363 | 0.00286353 | 0.00299989 |
| 1.00000e-06 | 0.00144494 | 0.00179294 | 0.00239363 | 0.00286353 | 0.00299989 |
| 1.00000e-07 | 0.00144494 | 0.00179294 | 0.00239363 | 0.00286353 | 0.00299989 |
| 1.00000e-08 | 0.00144494 | 0.00179294 | 0.00239363 | 0.00286353 | 0.00299989 |
| 1.00000e-09 | 0.00144494 | 0.00179294 | 0.00239363 | 0.00286353 | 0.00299989 |

PhCCCH3+H

=====

| Pa\K        | 20.0000     | 30.0000     | 40.0000     | 50.0000     | 60.0000     |
|-------------|-------------|-------------|-------------|-------------|-------------|
| 1.00000e+08 | 4.68710e-24 | 4.32499e-23 | 1.57200e-22 | 3.96944e-22 | 8.25434e-22 |
| 1.00000e+07 | 6.42782e-21 | 5.52064e-20 | 1.87966e-19 | 4.51574e-19 | 9.03912e-19 |
| 1.00000e+06 | 6.34911e-18 | 5.09261e-17 | 1.67834e-16 | 3.92958e-16 | 7.68061e-16 |
| 100000.     | 4.84715e-15 | 3.22033e-14 | 9.14056e-14 | 1.89176e-13 | 3.32805e-13 |
| 10000.0     | 1.46283e-12 | 6.76935e-12 | 1.60406e-11 | 2.96915e-11 | 4.83416e-11 |
| 1000.00     | 1.75533e-10 | 7.12816e-10 | 1.59221e-09 | 2.83394e-09 | 4.47480e-09 |
| 100.000     | 1.47674e-08 | 5.24617e-08 | 1.04853e-07 | 1.68217e-07 | 2.40272e-07 |
| 10.0000     | 5.32005e-07 | 1.00894e-06 | 1.30111e-06 | 1.50134e-06 | 1.65394e-06 |
| 1.00000     | 1.77444e-06 | 1.92093e-06 | 2.00554e-06 | 2.08061e-06 | 2.15337e-06 |
| 0.100000    | 2.06105e-06 | 2.10860e-06 | 2.15120e-06 | 2.19974e-06 | 2.25336e-06 |
| 0.0100000   | 2.10542e-06 | 2.12445e-06 | 2.15972e-06 | 2.20542e-06 | 2.25765e-06 |
| 0.00100000  | 2.10725e-06 | 2.12534e-06 | 2.16031e-06 | 2.20587e-06 | 2.25802e-06 |
| 0.000100000 | 2.10742e-06 | 2.12542e-06 | 2.16037e-06 | 2.20592e-06 | 2.25805e-06 |
| 1.00000e-05 | 2.10744e-06 | 2.12543e-06 | 2.16038e-06 | 2.20592e-06 | 2.25806e-06 |
| 1.00000e-06 | 2.10744e-06 | 2.12543e-06 | 2.16038e-06 | 2.20592e-06 | 2.25806e-06 |
| 1.00000e-07 | 2.10744e-06 | 2.12543e-06 | 2.16038e-06 | 2.20592e-06 | 2.25806e-06 |
| 1.00000e-08 | 2.10744e-06 | 2.12543e-06 | 2.16038e-06 | 2.20592e-06 | 2.25806e-06 |
| 1.00000e-09 | 2.10744e-06 | 2.12543e-06 | 2.16038e-06 | 2.20592e-06 | 2.25806e-06 |

| Pa\K        | 70.0000     | 80.0000     | 90.0000     | 100.000     | 110.000     |
|-------------|-------------|-------------|-------------|-------------|-------------|
| 1.00000e+08 | 1.52402e-21 | 2.60109e-21 | 4.20428e-21 | 6.53855e-21 | 9.89369e-21 |
| 1.00000e+07 | 1.61983e-18 | 2.69916e-18 | 4.27770e-18 | 6.54334e-18 | 9.76042e-18 |
| 1.00000e+06 | 1.34467e-15 | 2.18885e-15 | 3.38719e-15 | 5.05522e-15 | 7.34950e-15 |
| 100000.     | 5.31317e-13 | 7.96352e-13 | 1.14306e-12 | 1.59126e-12 | 2.16715e-12 |
| 10000.0     | 7.28356e-11 | 1.04297e-10 | 1.44193e-10 | 1.94434e-10 | 2.57520e-10 |
| 1000.00     | 6.56733e-09 | 9.18190e-09 | 1.24090e-08 | 1.63631e-08 | 2.11892e-08 |
| 100.000     | 3.19605e-07 | 4.05388e-07 | 4.97177e-07 | 5.94795e-07 | 6.98288e-07 |
| 10.0000     | 1.78056e-06 | 1.89281e-06 | 1.99741e-06 | 2.09859e-06 | 2.19924e-06 |
| 1.00000     | 2.22623e-06 | 2.30056e-06 | 2.37736e-06 | 2.45744e-06 | 2.54157e-06 |
| 0.100000    | 2.31150e-06 | 2.37408e-06 | 2.44127e-06 | 2.51335e-06 | 2.59074e-06 |
| 0.0100000   | 2.31497e-06 | 2.37703e-06 | 2.44384e-06 | 2.51564e-06 | 2.59282e-06 |
| 0.00100000  | 2.31529e-06 | 2.37730e-06 | 2.44408e-06 | 2.51586e-06 | 2.59302e-06 |
| 0.000100000 | 2.31532e-06 | 2.37733e-06 | 2.44411e-06 | 2.51588e-06 | 2.59304e-06 |
| 1.00000e-05 | 2.31532e-06 | 2.37733e-06 | 2.44411e-06 | 2.51589e-06 | 2.59304e-06 |
| 1.00000e-06 | 2.31532e-06 | 2.37733e-06 | 2.44411e-06 | 2.51589e-06 | 2.59304e-06 |
| 1.00000e-07 | 2.31532e-06 | 2.37733e-06 | 2.44411e-06 | 2.51589e-06 | 2.59304e-06 |
| 1.00000e-08 | 2.31532e-06 | 2.37733e-06 | 2.44411e-06 | 2.51589e-06 | 2.59304e-06 |
| 1.00000e-09 | 2.31532e-06 | 2.37733e-06 | 2.44411e-06 | 2.51589e-06 | 2.59304e-06 |

| Pa\K        | 120.000     | 130.000     | 140.000     | 150.000     | 160.000     |
|-------------|-------------|-------------|-------------|-------------|-------------|
| 1.00000e+08 | 1.46868e-20 | 2.15291e-20 | 3.13319e-20 | 4.54775e-20 | 6.61005e-20 |
| 1.00000e+07 | 1.43072e-17 | 2.07340e-17 | 2.98547e-17 | 4.28924e-17 | 6.17152e-17 |
| 1.00000e+06 | 1.04854e-14 | 1.47632e-14 | 2.06070e-14 | 2.86216e-14 | 3.96790e-14 |
| 100000.     | 2.90567e-12 | 3.85387e-12 | 5.07571e-12 | 6.65877e-12 | 8.72380e-12 |
| 10000.0     | 3.36748e-10 | 4.36500e-10 | 5.62640e-10 | 7.23062e-10 | 9.28431e-10 |
| 1000.00     | 2.70702e-08 | 3.42381e-08 | 4.29860e-08 | 5.36832e-08 | 6.67933e-08 |
| 100.000     | 8.07890e-07 | 9.24013e-07 | 1.04723e-06 | 1.17828e-06 | 1.31802e-06 |
| 10.0000     | 2.30151e-06 | 2.40717e-06 | 2.51778e-06 | 2.63479e-06 | 2.75963e-06 |
| 1.00000     | 2.63054e-06 | 2.72518e-06 | 2.82643e-06 | 2.93527e-06 | 3.05280e-06 |
| 0.100000    | 2.67398e-06 | 2.76373e-06 | 2.86077e-06 | 2.96598e-06 | 3.08038e-06 |
| 0.0100000   | 2.67588e-06 | 2.76549e-06 | 2.86241e-06 | 2.96752e-06 | 3.08182e-06 |
| 0.00100000  | 2.67607e-06 | 2.76566e-06 | 2.86257e-06 | 2.96767e-06 | 3.08197e-06 |
| 0.000100000 | 2.67609e-06 | 2.76568e-06 | 2.86259e-06 | 2.96768e-06 | 3.08198e-06 |
| 1.00000e-05 | 2.67609e-06 | 2.76568e-06 | 2.86259e-06 | 2.96768e-06 | 3.08198e-06 |
| 1.00000e-06 | 2.67609e-06 | 2.76568e-06 | 2.86259e-06 | 2.96768e-06 | 3.08198e-06 |
| 1.00000e-07 | 2.67609e-06 | 2.76568e-06 | 2.86259e-06 | 2.96768e-06 | 3.08198e-06 |
| 1.00000e-08 | 2.67609e-06 | 2.76568e-06 | 2.86259e-06 | 2.96768e-06 | 3.08198e-06 |
| 1.00000e-09 | 2.67609e-06 | 2.76568e-06 | 2.86259e-06 | 2.96768e-06 | 3.08198e-06 |

| Pa\K        | 170.000     | 180.000     | 190.000     | 200.000     | 210.000     |
|-------------|-------------|-------------|-------------|-------------|-------------|
| 1.00000e+08 | 9.65588e-20 | 1.42242e-19 | 2.11991e-19 | 3.20686e-19 | 4.94101e-19 |
| 1.00000e+07 | 8.92234e-17 | 1.30000e-16 | 1.91420e-16 | 2.85604e-16 | 4.32930e-16 |
| 1.00000e+06 | 5.50467e-14 | 7.65830e-14 | 1.07035e-13 | 1.50498e-13 | 2.13116e-13 |
| 100000.     | 1.14383e-11 | 1.50359e-11 | 1.98446e-11 | 2.63265e-11 | 3.51369e-11 |
| 10000.0     | 1.19322e-09 | 1.53713e-09 | 1.98700e-09 | 2.57950e-09 | 3.36471e-09 |
| 1000.00     | 8.28934e-08 | 1.02697e-07 | 1.27079e-07 | 1.57100e-07 | 1.94035e-07 |
| 100.000     | 1.46747e-06 | 1.62777e-06 | 1.80016e-06 | 1.98605e-06 | 2.18694e-06 |
| 10.0000     | 2.89375e-06 | 3.03862e-06 | 3.19577e-06 | 3.36684e-06 | 3.55348e-06 |
| 1.00000     | 3.18021e-06 | 3.31876e-06 | 3.46984e-06 | 3.63492e-06 | 3.81558e-06 |
| 0.100000    | 3.20506e-06 | 3.34126e-06 | 3.49029e-06 | 3.65360e-06 | 3.83270e-06 |
| 0.0100000   | 3.20644e-06 | 3.34257e-06 | 3.49153e-06 | 3.65479e-06 | 3.83384e-06 |
| 0.00100000  | 3.20657e-06 | 3.34270e-06 | 3.49166e-06 | 3.65491e-06 | 3.83396e-06 |
| 0.000100000 | 3.20659e-06 | 3.34271e-06 | 3.49167e-06 | 3.65492e-06 | 3.83397e-06 |
| 1.00000e-05 | 3.20659e-06 | 3.34271e-06 | 3.49167e-06 | 3.65492e-06 | 3.83397e-06 |
| 1.00000e-06 | 3.20659e-06 | 3.34271e-06 | 3.49167e-06 | 3.65492e-06 | 3.83397e-06 |
| 1.00000e-07 | 3.20659e-06 | 3.34271e-06 | 3.49167e-06 | 3.65492e-06 | 3.83397e-06 |
| 1.00000e-08 | 3.20659e-06 | 3.34271e-06 | 3.49167e-06 | 3.65492e-06 | 3.83397e-06 |
| 1.00000e-09 | 3.20659e-06 | 3.34271e-06 | 3.49167e-06 | 3.65492e-06 | 3.83397e-06 |

| Pa\K        | 220.000     | 230.000     | 240.000     | 250.000     | 260.000     |
|-------------|-------------|-------------|-------------|-------------|-------------|
| 1.00000e+08 | 7.78401e-19 | 1.25944e-18 | 2.10327e-18 | 3.64224e-18 | 6.55570e-18 |
| 1.00000e+07 | 6.68527e-16 | 1.05464e-15 | 1.70471e-15 | 2.83036e-15 | 4.83210e-15 |
| 1.00000e+06 | 3.04196e-13 | 4.37929e-13 | 6.36139e-13 | 9.32611e-13 | 1.37995e-12 |
| 100000.     | 4.72083e-11 | 6.38745e-11 | 8.70489e-11 | 1.19486e-10 | 1.65157e-10 |
| 10000.0     | 4.41105e-09 | 5.81174e-09 | 7.69365e-09 | 1.02286e-08 | 1.36482e-08 |
| 1000.00     | 2.39401e-07 | 2.94982e-07 | 3.62856e-07 | 4.45415e-07 | 5.45389e-07 |
| 100.000     | 2.40445e-06 | 2.64035e-06 | 2.89655e-06 | 3.17512e-06 | 3.47826e-06 |
| 10.0000     | 3.75750e-06 | 3.98077e-06 | 4.22531e-06 | 4.49322e-06 | 4.78674e-06 |
| 1.00000     | 4.01352e-06 | 4.23055e-06 | 4.46862e-06 | 4.72980e-06 | 5.01632e-06 |
| 0.100000    | 4.02930e-06 | 4.24515e-06 | 4.48220e-06 | 4.74250e-06 | 5.02825e-06 |
| 0.0100000   | 4.03040e-06 | 4.24622e-06 | 4.48323e-06 | 4.74349e-06 | 5.02922e-06 |
| 0.00100000  | 4.03051e-06 | 4.24632e-06 | 4.48333e-06 | 4.74359e-06 | 5.02931e-06 |
| 0.000100000 | 4.03052e-06 | 4.24633e-06 | 4.48334e-06 | 4.74360e-06 | 5.02932e-06 |
| 1.00000e-05 | 4.03052e-06 | 4.24633e-06 | 4.48334e-06 | 4.74360e-06 | 5.02932e-06 |
| 1.00000e-06 | 4.03052e-06 | 4.24633e-06 | 4.48334e-06 | 4.74360e-06 | 5.02932e-06 |
| 1.00000e-07 | 4.03052e-06 | 4.24633e-06 | 4.48334e-06 | 4.74360e-06 | 5.02932e-06 |
| 1.00000e-08 | 4.03052e-06 | 4.24633e-06 | 4.48334e-06 | 4.74360e-06 | 5.02932e-06 |
| 1.00000e-09 | 4.03052e-06 | 4.24633e-06 | 4.48334e-06 | 4.74360e-06 | 5.02932e-06 |

| Pa\K        | 270.000     | 280.000     | 290.000     | 300.000     | 310.000     |
|-------------|-------------|-------------|-------------|-------------|-------------|
| 1.00000e+08 | 1.22321e-17 | 2.34417e-17 | 4.54593e-17 | 6.43375e-17 | 1.65666e-16 |
| 1.00000e+07 | 8.46655e-15 | 1.51334e-14 | 2.73192e-14 | 4.43578e-14 | 8.72756e-14 |
| 1.00000e+06 | 2.06027e-12 | 3.10160e-12 | 4.70176e-12 | 6.91499e-12 | 1.09276e-11 |
| 100000.     | 2.29793e-10 | 3.21643e-10 | 4.52525e-10 | 6.40531e-10 | 9.05246e-10 |
| 10000.0     | 1.82620e-08 | 2.44811e-08 | 3.28444e-08 | 4.54556e-08 | 6.28976e-08 |
| 1000.00     | 6.65859e-07 | 8.10264e-07 | 9.82404e-07 | 1.28079e-06 | 1.72656e-06 |
| 100.000     | 3.80841e-06 | 4.16812e-06 | 4.56019e-06 | 5.07813e-06 | 5.45258e-06 |
| 10.0000     | 5.10827e-06 | 5.46033e-06 | 5.84559e-06 | 6.21432e-06 | 6.62617e-06 |
| 1.00000     | 5.33057e-06 | 5.67508e-06 | 6.05257e-06 | 6.35965e-06 | 6.69170e-06 |
| 0.100000    | 5.34182e-06 | 5.68575e-06 | 6.06272e-06 | 6.36653e-06 | 6.72631e-06 |
| 0.0100000   | 5.34276e-06 | 5.68666e-06 | 6.06361e-06 | 6.36709e-06 | 6.72715e-06 |
| 0.00100000  | 5.34285e-06 | 5.68675e-06 | 6.06369e-06 | 6.36714e-06 | 6.72724e-06 |
| 0.000100000 | 5.34286e-06 | 5.68676e-06 | 6.06370e-06 | 6.36715e-06 | 6.72725e-06 |
| 1.00000e-05 | 5.34286e-06 | 5.68676e-06 | 6.06370e-06 | 6.36715e-06 | 6.72725e-06 |
| 1.00000e-06 | 5.34286e-06 | 5.68676e-06 | 6.06370e-06 | 6.36715e-06 | 6.72725e-06 |
| 1.00000e-07 | 5.34286e-06 | 5.68676e-06 | 6.06370e-06 | 6.36715e-06 | 6.72725e-06 |
| 1.00000e-08 | 5.34286e-06 | 5.68676e-06 | 6.06370e-06 | 6.36715e-06 | 6.72725e-06 |
| 1.00000e-09 | 5.34286e-06 | 5.68676e-06 | 6.06370e-06 | 6.36715e-06 | 6.72725e-06 |

| Pa\K        | 400.000     | 500.000     | 600.000     | 700.000     | 800.000     |
|-------------|-------------|-------------|-------------|-------------|-------------|
| 1.00000e+08 | 1.23961e-07 | 3.92990e-05 | 0.000221941 | 0.000436806 | 0.000387775 |
| 1.00000e+07 | 5.16287e-08 | 1.62668e-05 | 0.000439869 | 0.00162508  | 0.00205742  |
| 1.00000e+06 | 2.96940e-08 | 4.92027e-06 | 0.000195845 | 0.00119965  | 0.00234130  |
| 100000.     | 1.83971e-07 | 6.42714e-06 | 0.000107936 | 0.000585319 | 0.00141602  |
| 10000.0     | 2.03771e-06 | 1.65501e-05 | 8.09675e-05 | 0.000257310 | 0.000626384 |
| 1000.00     | 8.28813e-06 | 2.54405e-05 | 6.29582e-05 | 0.000137135 | 0.000280427 |
| 100.000     | 1.23119e-05 | 2.79891e-05 | 5.94560e-05 | 0.000116644 | 0.000212289 |
| 10.0000     | 1.31122e-05 | 2.84211e-05 | 5.90944e-05 | 0.000114426 | 0.000204791 |
| 1.00000     | 1.31908e-05 | 2.84438e-05 | 5.90442e-05 | 0.000114199 | 0.000204053 |
| 0.100000    | 1.31947e-05 | 2.84448e-05 | 5.90389e-05 | 0.000114177 | 0.000203980 |
| 0.0100000   | 1.31951e-05 | 2.84449e-05 | 5.90383e-05 | 0.000114175 | 0.000203972 |
| 0.00100000  | 1.31952e-05 | 2.84449e-05 | 5.90383e-05 | 0.000114174 | 0.000203971 |
| 0.000100000 | 1.31952e-05 | 2.84449e-05 | 5.90383e-05 | 0.000114174 | 0.000203971 |
| 1.00000e-05 | 1.31952e-05 | 2.84449e-05 | 5.90383e-05 | 0.000114174 | 0.000203971 |
| 1.00000e-06 | 1.31952e-05 | 2.84449e-05 | 5.90383e-05 | 0.000114174 | 0.000203971 |

|             |             |             |             |             |             |
|-------------|-------------|-------------|-------------|-------------|-------------|
| 1.00000e-07 | 1.31952e-05 | 2.84449e-05 | 5.90383e-05 | 0.000114174 | 0.000203971 |
| 1.00000e-08 | 1.31952e-05 | 2.84449e-05 | 5.90383e-05 | 0.000114174 | 0.000203971 |
| 1.00000e-09 | 1.31952e-05 | 2.84449e-05 | 5.90383e-05 | 0.000114174 | 0.000203971 |

| Pa\K        | 900.000     | 1000.00     | 1100.00     | 1200.00     | 1300.00     |
|-------------|-------------|-------------|-------------|-------------|-------------|
| 1.00000e+08 | 0.000202845 | 0.000122063 | 9.71527e-05 | 8.88109e-05 | 8.56667e-05 |
| 1.00000e+07 | 0.00153869  | 0.00111055  | 0.000933321 | 0.000860470 | 0.000824188 |
| 1.00000e+06 | 0.00285921  | 0.00291631  | 0.00281412  | 0.00269740  | 0.00259071  |
| 100000.     | 0.00234788  | 0.00292523  | 0.00304724  | 0.00296824  | 0.00283948  |
| 10000.0     | 0.00123926  | 0.00177364  | 0.00193808  | 0.00193381  | 0.00193552  |
| 1000.00     | 0.000528584 | 0.000801159 | 0.000995035 | 0.00117965  | 0.00140068  |
| 100.000     | 0.000358301 | 0.000549507 | 0.000772557 | 0.00102886  | 0.00131112  |
| 10.0000     | 0.000339166 | 0.000521261 | 0.000748580 | 0.00101362  | 0.00130271  |
| 1.00000     | 0.000337353 | 0.000518667 | 0.000746406 | 0.00101226  | 0.00130197  |
| 0.100000    | 0.000337176 | 0.000518423 | 0.000746205 | 0.00101214  | 0.00130191  |
| 0.0100000   | 0.000337159 | 0.000518399 | 0.000746185 | 0.00101213  | 0.00130190  |
| 0.00100000  | 0.000337157 | 0.000518397 | 0.000746184 | 0.00101213  | 0.00130190  |
| 0.000100000 | 0.000337157 | 0.000518396 | 0.000746184 | 0.00101213  | 0.00130190  |
| 1.00000e-05 | 0.000337157 | 0.000518396 | 0.000746184 | 0.00101213  | 0.00130190  |
| 1.00000e-06 | 0.000337157 | 0.000518396 | 0.000746184 | 0.00101213  | 0.00130190  |
| 1.00000e-07 | 0.000337157 | 0.000518396 | 0.000746184 | 0.00101213  | 0.00130190  |
| 1.00000e-08 | 0.000337157 | 0.000518396 | 0.000746184 | 0.00101213  | 0.00130190  |
| 1.00000e-09 | 0.000337157 | 0.000518396 | 0.000746184 | 0.00101213  | 0.00130190  |

| Pa\K        | 1400.00     | 1500.00     | 1750.00    | 2000.00    | 2250.00    |
|-------------|-------------|-------------|------------|------------|------------|
| 1.00000e+08 | 8.43836e-05 | 8.39266e-05 | 0.00174956 | 0.00173387 | 0.00168546 |
| 1.00000e+07 | 0.000799242 | 0.000778825 | 0.00328125 | 0.00304431 | 0.00274406 |
| 1.00000e+06 | 0.00249413  | 0.00240805  | 0.00385133 | 0.00342030 | 0.00301492 |
| 100000.     | 0.00272340  | 0.00264329  | 0.00338459 | 0.00317252 | 0.00293133 |
| 10000.0     | 0.00199673  | 0.00211080  | 0.00283929 | 0.00297909 | 0.00287800 |
| 1000.00     | 0.00165068  | 0.00190508  | 0.00269784 | 0.00294321 | 0.00287059 |
| 100.000     | 0.00160194  | 0.00188076  | 0.00268126 | 0.00293962 | 0.00287000 |
| 10.0000     | 0.00159772  | 0.00187889  | 0.00267967 | 0.00293930 | 0.00286995 |
| 1.00000     | 0.00159737  | 0.00187875  | 0.00267952 | 0.00293928 | 0.00286995 |
| 0.100000    | 0.00159735  | 0.00187873  | 0.00267951 | 0.00293927 | 0.00286995 |
| 0.0100000   | 0.00159734  | 0.00187873  | 0.00267951 | 0.00293927 | 0.00286995 |
| 0.00100000  | 0.00159734  | 0.00187873  | 0.00267951 | 0.00293927 | 0.00286995 |
| 0.000100000 | 0.00159734  | 0.00187873  | 0.00267951 | 0.00293927 | 0.00286995 |
| 1.00000e-05 | 0.00159734  | 0.00187873  | 0.00267951 | 0.00293927 | 0.00286995 |
| 1.00000e-06 | 0.00159734  | 0.00187873  | 0.00267951 | 0.00293927 | 0.00286995 |
| 1.00000e-07 | 0.00159734  | 0.00187873  | 0.00267951 | 0.00293927 | 0.00286995 |
| 1.00000e-08 | 0.00159734  | 0.00187873  | 0.00267951 | 0.00293927 | 0.00286995 |
| 1.00000e-09 | 0.00159734  | 0.00187873  | 0.00267951 | 0.00293927 | 0.00286995 |

rad35

====

| Pa\K        | 20.0000     | 30.0000     | 40.0000     | 50.0000     | 60.0000     |
|-------------|-------------|-------------|-------------|-------------|-------------|
| 1.00000e+08 | 6.40731e-23 | 9.53265e-22 | 4.30696e-21 | 1.23377e-20 | 2.78313e-20 |
| 1.00000e+07 | 3.02794e-19 | 3.15679e-18 | 1.15489e-17 | 2.86288e-17 | 5.80006e-17 |
| 1.00000e+06 | 4.60337e-16 | 3.77416e-15 | 1.23194e-14 | 2.82919e-14 | 5.39841e-14 |
| 100000.     | 3.44205e-13 | 2.08620e-12 | 5.41919e-12 | 1.03000e-11 | 1.66908e-11 |
| 10000.0     | 5.77390e-11 | 1.76107e-10 | 3.10817e-10 | 4.56640e-10 | 6.13406e-10 |
| 1000.00     | 1.26439e-09 | 2.70658e-09 | 4.16348e-09 | 5.67386e-09 | 7.25947e-09 |
| 100.000     | 1.32740e-08 | 2.58205e-08 | 3.74048e-08 | 4.84868e-08 | 5.92869e-08 |
| 10.0000     | 8.94503e-08 | 1.30198e-07 | 1.53501e-07 | 1.70005e-07 | 1.83298e-07 |
| 1.00000     | 1.88362e-07 | 2.00409e-07 | 2.07555e-07 | 2.14212e-07 | 2.20954e-07 |
| 0.100000    | 2.06885e-07 | 2.09942e-07 | 2.14124e-07 | 2.19306e-07 | 2.25162e-07 |
| 0.0100000   | 2.08841e-07 | 2.10922e-07 | 2.14793e-07 | 2.19821e-07 | 2.25587e-07 |
| 0.00100000  | 2.09037e-07 | 2.11020e-07 | 2.14860e-07 | 2.19873e-07 | 2.25629e-07 |
| 0.000100000 | 2.09057e-07 | 2.11030e-07 | 2.14866e-07 | 2.19878e-07 | 2.25633e-07 |
| 1.00000e-05 | 2.09059e-07 | 2.11031e-07 | 2.14867e-07 | 2.19879e-07 | 2.25634e-07 |
| 1.00000e-06 | 2.09059e-07 | 2.11031e-07 | 2.14867e-07 | 2.19879e-07 | 2.25634e-07 |
| 1.00000e-07 | 2.09059e-07 | 2.11031e-07 | 2.14867e-07 | 2.19879e-07 | 2.25634e-07 |
| 1.00000e-08 | 2.09059e-07 | 2.11031e-07 | 2.14867e-07 | 2.19879e-07 | 2.25634e-07 |
| 1.00000e-09 | 2.09059e-07 | 2.11031e-07 | 2.14867e-07 | 2.19879e-07 | 2.25634e-07 |

| Pa\K        | 70.0000     | 80.0000     | 90.0000     | 100.000     | 110.000     |
|-------------|-------------|-------------|-------------|-------------|-------------|
| 1.00000e+08 | 5.43011e-20 | 9.62593e-20 | 1.59608e-19 | 2.52202e-19 | 3.84671e-19 |
| 1.00000e+07 | 1.04020e-16 | 1.72152e-16 | 2.69422e-16 | 4.05026e-16 | 5.91206e-16 |
| 1.00000e+06 | 9.19779e-14 | 1.45334e-13 | 2.17789e-13 | 3.13997e-13 | 4.39854e-13 |
| 100000.     | 2.45993e-11 | 3.40870e-11 | 4.52681e-11 | 5.83117e-11 | 7.34477e-11 |
| 10000.0     | 7.82290e-10 | 9.65145e-10 | 1.16429e-09 | 1.38249e-09 | 1.62308e-09 |
| 1000.00     | 8.93963e-09 | 1.07347e-08 | 1.26670e-08 | 1.47611e-08 | 1.70457e-08 |
| 100.000     | 6.99606e-08 | 8.06385e-08 | 9.14353e-08 | 1.02457e-07 | 1.13806e-07 |
| 10.0000     | 1.94952e-07 | 2.05785e-07 | 2.16274e-07 | 2.26728e-07 | 2.37372e-07 |
| 1.00000     | 2.27957e-07 | 2.35325e-07 | 2.43137e-07 | 2.51464e-07 | 2.60380e-07 |

|             |             |             |             |             |             |
|-------------|-------------|-------------|-------------|-------------|-------------|
| 0.100000    | 2.31573e-07 | 2.38517e-07 | 2.46011e-07 | 2.54090e-07 | 2.62806e-07 |
| 0.0100000   | 2.31937e-07 | 2.38839e-07 | 2.46300e-07 | 2.54353e-07 | 2.63050e-07 |
| 0.00100000  | 2.31974e-07 | 2.38871e-07 | 2.46329e-07 | 2.54380e-07 | 2.63074e-07 |
| 0.000100000 | 2.31978e-07 | 2.38874e-07 | 2.46331e-07 | 2.54382e-07 | 2.63076e-07 |
| 1.00000e-05 | 2.31978e-07 | 2.38874e-07 | 2.46332e-07 | 2.54382e-07 | 2.63077e-07 |
| 1.00000e-06 | 2.31978e-07 | 2.38874e-07 | 2.46332e-07 | 2.54382e-07 | 2.63077e-07 |
| 1.00000e-07 | 2.31978e-07 | 2.38874e-07 | 2.46332e-07 | 2.54382e-07 | 2.63077e-07 |
| 1.00000e-08 | 2.31978e-07 | 2.38874e-07 | 2.46332e-07 | 2.54382e-07 | 2.63077e-07 |
| 1.00000e-09 | 2.31978e-07 | 2.38874e-07 | 2.46332e-07 | 2.54382e-07 | 2.63077e-07 |

| Pa\K        | 120.000     | 130.000     | 140.000     | 150.000     | 160.000     |
|-------------|-------------|-------------|-------------|-------------|-------------|
| 1.00000e+08 | 5.71646e-19 | 8.33585e-19 | 1.19954e-18 | 1.71137e-18 | 2.43031e-18 |
| 1.00000e+07 | 8.44517e-16 | 1.18769e-15 | 1.65235e-15 | 2.28310e-15 | 3.14368e-15 |
| 1.00000e+06 | 6.02936e-13 | 8.13093e-13 | 1.08325e-12 | 1.43051e-12 | 1.87756e-12 |
| 100000.     | 9.09780e-11 | 1.11291e-10 | 1.34880e-10 | 1.62368e-10 | 1.94535e-10 |
| 10000.0     | 1.89009e-09 | 2.18842e-09 | 2.52406e-09 | 2.90433e-09 | 3.33820e-09 |
| 1000.00     | 1.95544e-08 | 2.23273e-08 | 2.54123e-08 | 2.88668e-08 | 3.27594e-08 |
| 100.000     | 1.25591e-07 | 1.37923e-07 | 1.50926e-07 | 1.64735e-07 | 1.79496e-07 |
| 10.0000     | 2.48388e-07 | 2.59937e-07 | 2.72174e-07 | 2.85255e-07 | 2.99341e-07 |
| 1.00000     | 2.69965e-07 | 2.80314e-07 | 2.91532e-07 | 3.03739e-07 | 3.17070e-07 |
| 0.100000    | 2.72229e-07 | 2.82442e-07 | 2.93546e-07 | 3.05655e-07 | 3.18903e-07 |
| 0.0100000   | 2.72456e-07 | 2.82655e-07 | 2.93748e-07 | 3.05847e-07 | 3.19086e-07 |
| 0.00100000  | 2.72479e-07 | 2.82677e-07 | 2.93768e-07 | 3.05866e-07 | 3.19104e-07 |
| 0.000100000 | 2.72481e-07 | 2.82679e-07 | 2.93770e-07 | 3.05868e-07 | 3.19106e-07 |
| 1.00000e-05 | 2.72481e-07 | 2.82679e-07 | 2.93770e-07 | 3.05869e-07 | 3.19106e-07 |
| 1.00000e-06 | 2.72481e-07 | 2.82679e-07 | 2.93770e-07 | 3.05869e-07 | 3.19106e-07 |
| 1.00000e-07 | 2.72481e-07 | 2.82679e-07 | 2.93770e-07 | 3.05869e-07 | 3.19106e-07 |
| 1.00000e-08 | 2.72481e-07 | 2.82679e-07 | 2.93770e-07 | 3.05869e-07 | 3.19106e-07 |
| 1.00000e-09 | 2.72481e-07 | 2.82679e-07 | 2.93770e-07 | 3.05869e-07 | 3.19106e-07 |

| Pa\K        | 170.000     | 180.000     | 190.000     | 200.000     | 210.000     |
|-------------|-------------|-------------|-------------|-------------|-------------|
| 1.00000e+08 | 3.44730e-18 | 4.89949e-18 | 6.99739e-18 | 1.00704e-17 | 1.46457e-17 |
| 1.00000e+07 | 4.32616e-15 | 5.96552e-15 | 8.26212e-15 | 1.15180e-14 | 1.61958e-14 |
| 1.00000e+06 | 2.45474e-12 | 3.20266e-12 | 4.17590e-12 | 5.44792e-12 | 7.11792e-12 |
| 100000.     | 2.32358e-10 | 2.77053e-10 | 3.30133e-10 | 3.93478e-10 | 4.69419e-10 |
| 10000.0     | 3.83658e-09 | 4.41283e-09 | 5.08325e-09 | 5.86772e-09 | 6.79048e-09 |
| 1000.00     | 3.71719e-08 | 4.22013e-08 | 4.79625e-08 | 5.45909e-08 | 6.22460e-08 |
| 100.000     | 1.95370e-07 | 2.12537e-07 | 2.31187e-07 | 2.51532e-07 | 2.73802e-07 |
| 10.0000     | 3.14602e-07 | 3.31219e-07 | 3.49388e-07 | 3.69319e-07 | 3.91239e-07 |
| 1.00000     | 3.31675e-07 | 3.47718e-07 | 3.65383e-07 | 3.84871e-07 | 4.06401e-07 |
| 0.100000    | 3.33435e-07 | 3.49415e-07 | 3.67025e-07 | 3.86464e-07 | 4.07951e-07 |
| 0.0100000   | 3.33611e-07 | 3.49584e-07 | 3.67189e-07 | 3.86624e-07 | 4.08106e-07 |
| 0.00100000  | 3.33629e-07 | 3.49601e-07 | 3.67206e-07 | 3.86640e-07 | 4.08121e-07 |
| 0.000100000 | 3.33630e-07 | 3.49603e-07 | 3.67207e-07 | 3.86641e-07 | 4.08123e-07 |
| 1.00000e-05 | 3.33631e-07 | 3.49603e-07 | 3.67207e-07 | 3.86641e-07 | 4.08123e-07 |
| 1.00000e-06 | 3.33631e-07 | 3.49603e-07 | 3.67207e-07 | 3.86641e-07 | 4.08123e-07 |
| 1.00000e-07 | 3.33631e-07 | 3.49603e-07 | 3.67207e-07 | 3.86641e-07 | 4.08123e-07 |
| 1.00000e-08 | 3.33631e-07 | 3.49603e-07 | 3.67207e-07 | 3.86641e-07 | 4.08123e-07 |
| 1.00000e-09 | 3.33631e-07 | 3.49603e-07 | 3.67207e-07 | 3.86641e-07 | 4.08123e-07 |

| Pa\K        | 220.000     | 230.000     | 240.000     | 250.000     | 260.000     |
|-------------|-------------|-------------|-------------|-------------|-------------|
| 1.00000e+08 | 2.15884e-17 | 3.23615e-17 | 4.95177e-17 | 7.76533e-17 | 1.25240e-16 |
| 1.00000e+07 | 2.30180e-14 | 3.31344e-14 | 4.84160e-14 | 7.19676e-14 | 1.09019e-13 |
| 1.00000e+06 | 9.32003e-12 | 1.22361e-11 | 1.61131e-11 | 2.12870e-11 | 2.82153e-11 |
| 100000.     | 5.60856e-10 | 6.71387e-10 | 8.05483e-10 | 9.68703e-10 | 1.16796e-09 |
| 10000.0     | 7.88114e-09 | 9.17585e-09 | 1.07187e-08 | 1.25636e-08 | 1.47763e-08 |
| 1000.00     | 7.11142e-08 | 8.14133e-08 | 9.33961e-08 | 1.07355e-07 | 1.23628e-07 |
| 100.000     | 2.98249e-07 | 3.25144e-07 | 3.54787e-07 | 3.87501e-07 | 4.23639e-07 |
| 10.0000     | 4.15397e-07 | 4.42059e-07 | 4.71518e-07 | 5.04092e-07 | 5.40129e-07 |
| 1.00000     | 4.30212e-07 | 4.56568e-07 | 4.85754e-07 | 5.18086e-07 | 5.53906e-07 |
| 0.100000    | 4.31723e-07 | 4.58045e-07 | 4.87202e-07 | 5.19507e-07 | 5.55302e-07 |
| 0.0100000   | 4.31875e-07 | 4.58193e-07 | 4.87346e-07 | 5.19649e-07 | 5.55442e-07 |
| 0.00100000  | 4.31890e-07 | 4.58207e-07 | 4.87361e-07 | 5.19663e-07 | 5.55456e-07 |
| 0.000100000 | 4.31891e-07 | 4.58209e-07 | 4.87362e-07 | 5.19664e-07 | 5.55458e-07 |
| 1.00000e-05 | 4.31892e-07 | 4.58209e-07 | 4.87362e-07 | 5.19665e-07 | 5.55458e-07 |
| 1.00000e-06 | 4.31892e-07 | 4.58209e-07 | 4.87362e-07 | 5.19665e-07 | 5.55458e-07 |
| 1.00000e-07 | 4.31892e-07 | 4.58209e-07 | 4.87362e-07 | 5.19665e-07 | 5.55458e-07 |
| 1.00000e-08 | 4.31892e-07 | 4.58209e-07 | 4.87362e-07 | 5.19665e-07 | 5.55458e-07 |
| 1.00000e-09 | 4.31892e-07 | 4.58209e-07 | 4.87362e-07 | 5.19665e-07 | 5.55458e-07 |

| Pa\K        | 270.000     | 280.000     | 290.000     | 300.000     | 310.000     |
|-------------|-------------|-------------|-------------|-------------|-------------|
| 1.00000e+08 | 2.08031e-16 | 3.54959e-16 | 6.17374e-16 | 8.27233e-16 | 1.18821e-15 |
| 1.00000e+07 | 1.68422e-13 | 2.64978e-13 | 4.22730e-13 | 5.54516e-13 | 7.40875e-13 |
| 1.00000e+06 | 3.75210e-11 | 5.00505e-11 | 6.69451e-11 | 8.8329e-11  | 1.18037e-10 |
| 100000.     | 1.41185e-09 | 1.71104e-09 | 2.07877e-09 | 2.5632e-09  | 3.30883e-09 |
| 10000.0     | 1.74370e-08 | 2.06432e-08 | 2.45134e-08 | 2.93387e-08 | 3.74839e-08 |

|             |             |             |             |             |             |
|-------------|-------------|-------------|-------------|-------------|-------------|
| 1000.00     | 1.42600e-07 | 1.64710e-07 | 1.90453e-07 | 3.25101e-07 | 2.55074e-07 |
| 100.000     | 4.63585e-07 | 5.07759e-07 | 5.56611e-07 | 6.47655e-07 | 6.70237e-07 |
| 10.0000     | 5.80004e-07 | 6.24130e-07 | 6.72948e-07 | 7.22514e-07 | 7.86504e-07 |
| 1.00000     | 5.93588e-07 | 6.37539e-07 | 6.86202e-07 | 7.30869e-07 | 7.99484e-07 |
| 0.100000    | 5.94963e-07 | 6.38895e-07 | 6.87540e-07 | 7.31713e-07 | 8.00793e-07 |
| 0.0100000   | 5.95101e-07 | 6.39031e-07 | 6.87674e-07 | 7.31798e-07 | 8.00924e-07 |
| 0.00100000  | 5.95115e-07 | 6.39045e-07 | 6.87688e-07 | 7.31806e-07 | 8.00937e-07 |
| 0.000100000 | 5.95116e-07 | 6.39046e-07 | 6.87689e-07 | 7.31807e-07 | 8.00938e-07 |
| 1.00000e-05 | 5.95116e-07 | 6.39046e-07 | 6.87689e-07 | 7.31807e-07 | 8.00939e-07 |
| 1.00000e-06 | 5.95116e-07 | 6.39046e-07 | 6.87689e-07 | 7.31807e-07 | 8.00939e-07 |
| 1.00000e-07 | 5.95116e-07 | 6.39046e-07 | 6.87689e-07 | 7.31807e-07 | 8.00939e-07 |
| 1.00000e-08 | 5.95116e-07 | 6.39046e-07 | 6.87689e-07 | 7.31807e-07 | 8.00939e-07 |
| 1.00000e-09 | 5.95116e-07 | 6.39046e-07 | 6.87689e-07 | 7.31807e-07 | 8.00939e-07 |

| Pa\K        | 400.000     | 500.000     | 600.000     | 700.000     | 800.000     |
|-------------|-------------|-------------|-------------|-------------|-------------|
| 1.00000e+08 | 4.77331e-08 | 1.48249e-05 | 8.88244e-05 | 0.000191540 | 0.000183292 |
| 1.00000e+07 | 2.51259e-08 | 5.94386e-06 | 0.000174889 | 0.000676524 | 0.000876030 |
| 1.00000e+06 | 1.67664e-08 | 1.50075e-06 | 6.70613e-05 | 0.000452735 | 0.000945394 |
| 100000.     | 6.93848e-08 | 1.55311e-06 | 2.87798e-05 | 0.000177808 | 0.000487092 |
| 10000.0     | 4.24062e-07 | 3.07566e-06 | 1.65616e-05 | 6.08959e-05 | 0.000174712 |
| 1000.00     | 1.22523e-06 | 3.94887e-06 | 1.08572e-05 | 2.68517e-05 | 6.38207e-05 |
| 100.000     | 1.62159e-06 | 4.08984e-06 | 9.76557e-06 | 2.15507e-05 | 4.40175e-05 |
| 10.0000     | 1.68199e-06 | 4.10730e-06 | 9.64632e-06 | 2.09833e-05 | 4.18515e-05 |
| 1.00000     | 1.68837e-06 | 4.10914e-06 | 9.63440e-06 | 2.09265e-05 | 4.16367e-05 |
| 0.100000    | 1.68901e-06 | 4.10933e-06 | 9.63315e-06 | 2.09208e-05 | 4.16153e-05 |
| 0.0100000   | 1.68908e-06 | 4.10935e-06 | 9.63305e-06 | 2.09202e-05 | 4.16132e-05 |
| 0.00100000  | 1.68909e-06 | 4.10935e-06 | 9.63305e-06 | 2.09202e-05 | 4.16129e-05 |
| 0.000100000 | 1.68909e-06 | 4.10935e-06 | 9.63305e-06 | 2.09202e-05 | 4.16129e-05 |
| 1.00000e-05 | 1.68909e-06 | 4.10935e-06 | 9.63305e-06 | 2.09202e-05 | 4.16129e-05 |
| 1.00000e-06 | 1.68909e-06 | 4.10935e-06 | 9.63305e-06 | 2.09202e-05 | 4.16129e-05 |
| 1.00000e-07 | 1.68909e-06 | 4.10935e-06 | 9.63305e-06 | 2.09202e-05 | 4.16129e-05 |
| 1.00000e-08 | 1.68909e-06 | 4.10935e-06 | 9.63305e-06 | 2.09202e-05 | 4.16129e-05 |
| 1.00000e-09 | 1.68909e-06 | 4.10935e-06 | 9.63305e-06 | 2.09202e-05 | 4.16129e-05 |

| Pa\K        | 900.000     | 1000.00     | 1100.00     | 1200.00     | 1300.00     |
|-------------|-------------|-------------|-------------|-------------|-------------|
| 1.00000e+08 | 9.93599e-05 | 6.08230e-05 | 4.81602e-05 | 4.23353e-05 | 3.72007e-05 |
| 1.00000e+07 | 0.000660850 | 0.000479740 | 0.000404450 | 0.000372089 | 0.000352975 |
| 1.00000e+06 | 0.00119139  | 0.00123105  | 0.00119653  | 0.00115078  | 0.00110571  |
| 100000.     | 0.000892659 | 0.00116707  | 0.00123664  | 0.00120767  | 0.00115029  |
| 10000.0     | 0.000406443 | 0.000635768 | 0.000709516 | 0.000701550 | 0.000692795 |
| 1000.00     | 0.000142298 | 0.000238304 | 0.000302948 | 0.000363497 | 0.000444021 |
| 100.000     | 8.32107e-05 | 0.000139726 | 0.000209990 | 0.000297599 | 0.000403139 |
| 10.0000     | 7.65785e-05 | 0.000128646 | 0.000199933 | 0.000290879 | 0.000399222 |
| 1.00000     | 7.59425e-05 | 0.000127617 | 0.000199009 | 0.000290268 | 0.000398874 |
| 0.100000    | 7.58801e-05 | 0.000127519 | 0.000198923 | 0.000290212 | 0.000398841 |
| 0.0100000   | 7.58739e-05 | 0.000127509 | 0.000198915 | 0.000290207 | 0.000398838 |
| 0.00100000  | 7.58733e-05 | 0.000127508 | 0.000198914 | 0.000290206 | 0.000398838 |
| 0.000100000 | 7.58733e-05 | 0.000127508 | 0.000198914 | 0.000290206 | 0.000398838 |
| 1.00000e-05 | 7.58733e-05 | 0.000127508 | 0.000198914 | 0.000290206 | 0.000398838 |
| 1.00000e-06 | 7.58733e-05 | 0.000127508 | 0.000198914 | 0.000290206 | 0.000398838 |
| 1.00000e-07 | 7.58733e-05 | 0.000127508 | 0.000198914 | 0.000290206 | 0.000398838 |
| 1.00000e-08 | 7.58733e-05 | 0.000127508 | 0.000198914 | 0.000290206 | 0.000398838 |
| 1.00000e-09 | 7.58733e-05 | 0.000127508 | 0.000198914 | 0.000290206 | 0.000398838 |

| Pa\K        | 1400.00     | 1500.00     | 1750.00     | 2000.00     | 2250.00     |
|-------------|-------------|-------------|-------------|-------------|-------------|
| 1.00000e+08 | 3.12521e-05 | 2.60916e-05 | 0.000895898 | 0.000901040 | 0.000882124 |
| 1.00000e+07 | 0.000336052 | 0.000320662 | 0.00189637  | 0.00180351  | 0.00162031  |
| 1.00000e+06 | 0.00106261  | 0.00102282  | 0.00211841  | 0.00184700  | 0.00156481  |
| 100000.     | 0.00109628  | 0.00105895  | 0.00153744  | 0.00138400  | 0.00127908  |
| 10000.0     | 0.000713190 | 0.000763965 | 0.00104644  | 0.00115097  | 0.00118476  |
| 1000.00     | 0.000545470 | 0.000659228 | 0.000932528 | 0.00111243  | 0.00117251  |
| 100.000     | 0.000522027 | 0.000646692 | 0.000919356 | 0.00110848  | 0.00117135  |
| 10.0000     | 0.000519922 | 0.000645649 | 0.000918075 | 0.00110810  | 0.00117124  |
| 1.00000     | 0.000519740 | 0.000645564 | 0.000917949 | 0.00110806  | 0.00117123  |
| 0.100000    | 0.000519724 | 0.000645556 | 0.000917937 | 0.00110806  | 0.00117123  |
| 0.0100000   | 0.000519722 | 0.000645556 | 0.000917937 | 0.00110806  | 0.00117123  |
| 0.00100000  | 0.000519722 | 0.000645555 | 0.000917937 | 0.00110806  | 0.00117123  |
| 0.000100000 | 0.000519722 | 0.000645555 | 0.000917937 | 0.00110806  | 0.00117123  |
| 1.00000e-05 | 0.000519722 | 0.000645555 | 0.000917937 | 0.00110806  | 0.00117123  |
| 1.00000e-06 | 0.000519722 | 0.000645555 | 0.000917937 | 0.00110806  | 0.00117123  |
| 1.00000e-07 | 0.000519722 | 0.000645555 | 0.000917937 | 0.00110806  | 0.00117123  |
| 1.00000e-08 | 0.000519722 | 0.000645555 | 0.000917937 | 0.00110806  | 0.00117123  |
| 1.00000e-09 | 0.000519722 | 0.000645555 | 0.000917937 | 0.00110806  | 0.00117123  |

PAH10+CH3

=====

| Pa\K | 20.0000 | 30.0000 | 40.0000 | 50.0000 | 60.0000 |
|------|---------|---------|---------|---------|---------|
|------|---------|---------|---------|---------|---------|

|             |             |             |             |             |             |
|-------------|-------------|-------------|-------------|-------------|-------------|
| 1.00000e+08 | 5.40369e-34 | 1.70739e-32 | 1.23425e-31 | 5.09345e-31 | 1.56836e-30 |
| 1.00000e+07 | 2.83982e-29 | 6.24673e-28 | 3.55164e-27 | 1.22436e-26 | 3.26293e-26 |
| 1.00000e+06 | 3.73204e-25 | 5.08359e-24 | 2.18055e-23 | 6.12524e-23 | 1.38621e-22 |
| 100000.     | 9.23118e-22 | 7.20728e-21 | 2.25293e-20 | 5.06624e-20 | 9.64228e-20 |
| 10000.0     | 3.84892e-19 | 1.89221e-18 | 4.72827e-18 | 9.26151e-18 | 1.60154e-17 |
| 1000.00     | 5.11577e-17 | 2.18286e-16 | 5.17072e-16 | 9.82827e-16 | 1.66513e-15 |
| 100.000     | 5.04864e-15 | 2.03340e-14 | 4.60201e-14 | 8.37606e-14 | 1.35881e-13 |
| 10.0000     | 3.39579e-13 | 9.51216e-13 | 1.58884e-12 | 2.22793e-12 | 2.87442e-12 |
| 1.00000     | 3.44940e-12 | 4.44500e-12 | 5.04141e-12 | 5.58217e-12 | 6.13522e-12 |
| 0.100000    | 5.23275e-12 | 5.51346e-12 | 5.84180e-12 | 6.24665e-12 | 6.71912e-12 |
| 0.0100000   | 5.49620e-12 | 5.65463e-12 | 5.94247e-12 | 6.32744e-12 | 6.78829e-12 |
| 0.00100000  | 5.52551e-12 | 5.66954e-12 | 5.95289e-12 | 6.33573e-12 | 6.79534e-12 |
| 0.000100000 | 5.52847e-12 | 5.67104e-12 | 5.95394e-12 | 6.33656e-12 | 6.79605e-12 |
| 1.00000e-05 | 5.52877e-12 | 5.67119e-12 | 5.95404e-12 | 6.33664e-12 | 6.79612e-12 |
| 1.00000e-06 | 5.52880e-12 | 5.67120e-12 | 5.95405e-12 | 6.33665e-12 | 6.79612e-12 |
| 1.00000e-07 | 5.52880e-12 | 5.67120e-12 | 5.95405e-12 | 6.33665e-12 | 6.79612e-12 |
| 1.00000e-08 | 5.52880e-12 | 5.67120e-12 | 5.95405e-12 | 6.33665e-12 | 6.79612e-12 |
| 1.00000e-09 | 5.52880e-12 | 5.67120e-12 | 5.95405e-12 | 6.33665e-12 | 6.79612e-12 |

| Pa\K        | 70.0000     | 80.0000     | 90.0000     | 100.000     | 110.000     |
|-------------|-------------|-------------|-------------|-------------|-------------|
| 1.00000e+08 | 4.04969e-30 | 9.33008e-30 | 1.99068e-29 | 4.03099e-29 | 7.88309e-29 |
| 1.00000e+07 | 7.46163e-26 | 1.54668e-25 | 3.00247e-25 | 5.57625e-25 | 1.00593e-24 |
| 1.00000e+06 | 2.76133e-22 | 5.07071e-22 | 8.82137e-22 | 1.47982e-21 | 2.42374e-21 |
| 100000.     | 1.66413e-19 | 2.69974e-19 | 4.20514e-19 | 6.37558e-19 | 9.50014e-19 |
| 10000.0     | 2.57280e-17 | 3.94475e-17 | 5.86676e-17 | 8.55426e-17 | 1.23226e-16 |
| 1000.00     | 2.63349e-15 | 3.98589e-15 | 5.86094e-15 | 8.45665e-15 | 1.20600e-14 |
| 100.000     | 2.05547e-13 | 2.97016e-13 | 4.15921e-13 | 5.69704e-13 | 7.68242e-13 |
| 10.0000     | 3.54213e-12 | 4.24760e-12 | 5.00861e-12 | 5.84465e-12 | 6.77802e-12 |
| 1.00000     | 6.72871e-12 | 7.38206e-12 | 8.11269e-12 | 8.93896e-12 | 9.88219e-12 |
| 0.100000    | 7.26053e-12 | 7.87863e-12 | 8.58494e-12 | 9.39453e-12 | 1.03268e-11 |
| 0.0100000   | 7.32220e-12 | 7.93518e-12 | 8.63789e-12 | 9.44493e-12 | 1.03754e-11 |
| 0.00100000  | 7.32846e-12 | 7.94091e-12 | 8.64324e-12 | 9.45002e-12 | 1.03803e-11 |
| 0.000100000 | 7.32909e-12 | 7.94148e-12 | 8.64378e-12 | 9.45053e-12 | 1.03808e-11 |
| 1.00000e-05 | 7.32915e-12 | 7.94154e-12 | 8.64383e-12 | 9.45058e-12 | 1.03809e-11 |
| 1.00000e-06 | 7.32916e-12 | 7.94154e-12 | 8.64384e-12 | 9.45058e-12 | 1.03809e-11 |
| 1.00000e-07 | 7.32916e-12 | 7.94154e-12 | 8.64384e-12 | 9.45058e-12 | 1.03809e-11 |
| 1.00000e-08 | 7.32916e-12 | 7.94154e-12 | 8.64384e-12 | 9.45058e-12 | 1.03809e-11 |
| 1.00000e-09 | 7.32916e-12 | 7.94154e-12 | 8.64384e-12 | 9.45058e-12 | 1.03809e-11 |

| Pa\K        | 120.000     | 130.000     | 140.000     | 150.000     | 160.000     |
|-------------|-------------|-------------|-------------|-------------|-------------|
| 1.00000e+08 | 1.50873e-28 | 2.85594e-28 | 5.39392e-28 | 1.02394e-27 | 1.96601e-27 |
| 1.00000e+07 | 1.78296e-24 | 3.13355e-24 | 5.50200e-24 | 9.71236e-24 | 1.73277e-23 |
| 1.00000e+06 | 3.91201e-21 | 6.26766e-21 | 1.00260e-20 | 1.60879e-20 | 2.59897e-20 |
| 100000.     | 1.40139e-18 | 2.05821e-18 | 3.02367e-18 | 4.46001e-18 | 6.62528e-18 |
| 10000.0     | 1.76412e-16 | 2.52193e-16 | 3.61441e-16 | 5.21039e-16 | 7.57505e-16 |
| 1000.00     | 1.70928e-14 | 2.41842e-14 | 3.42822e-14 | 4.88302e-14 | 7.00419e-14 |
| 100.000     | 1.02470e-12 | 1.35667e-12 | 1.78768e-12 | 2.34908e-12 | 3.08256e-12 |
| 10.0000     | 7.83525e-12 | 9.04866e-12 | 1.04582e-11 | 1.21134e-11 | 1.40763e-11 |
| 1.00000     | 1.09684e-11 | 1.22297e-11 | 1.37064e-11 | 1.54491e-11 | 1.75207e-11 |
| 0.100000    | 1.14065e-11 | 1.26652e-11 | 1.41426e-11 | 1.58889e-11 | 1.79672e-11 |
| 0.0100000   | 1.14539e-11 | 1.27119e-11 | 1.41890e-11 | 1.59354e-11 | 1.80140e-11 |
| 0.00100000  | 1.14587e-11 | 1.27166e-11 | 1.41936e-11 | 1.59400e-11 | 1.80187e-11 |
| 0.000100000 | 1.14592e-11 | 1.27170e-11 | 1.41941e-11 | 1.59405e-11 | 1.80192e-11 |
| 1.00000e-05 | 1.14592e-11 | 1.27171e-11 | 1.41941e-11 | 1.59406e-11 | 1.80192e-11 |
| 1.00000e-06 | 1.14592e-11 | 1.27171e-11 | 1.41941e-11 | 1.59406e-11 | 1.80192e-11 |
| 1.00000e-07 | 1.14592e-11 | 1.27171e-11 | 1.41941e-11 | 1.59406e-11 | 1.80192e-11 |
| 1.00000e-08 | 1.14592e-11 | 1.27171e-11 | 1.41941e-11 | 1.59406e-11 | 1.80192e-11 |
| 1.00000e-09 | 1.14592e-11 | 1.27171e-11 | 1.41941e-11 | 1.59406e-11 | 1.80192e-11 |

| Pa\K        | 170.000     | 180.000     | 190.000     | 200.000     | 210.000     |
|-------------|-------------|-------------|-------------|-------------|-------------|
| 1.00000e+08 | 3.83879e-27 | 7.65948e-27 | 1.56886e-26 | 3.31426e-26 | 7.25816e-26 |
| 1.00000e+07 | 3.13822e-23 | 5.79124e-23 | 1.09248e-22 | 2.11308e-22 | 4.20317e-22 |
| 1.00000e+06 | 4.23871e-20 | 6.99241e-20 | 1.16811e-19 | 1.97712e-19 | 3.39071e-19 |
| 100000.     | 9.93445e-18 | 1.50614e-17 | 2.31102e-17 | 3.59041e-17 | 5.64754e-17 |
| 10000.0     | 1.11295e-15 | 1.65484e-15 | 2.49227e-15 | 3.80291e-15 | 5.87795e-15 |
| 1000.00     | 1.01332e-13 | 1.47982e-13 | 2.18183e-13 | 3.24611e-13 | 4.86848e-13 |
| 100.000     | 4.04328e-12 | 5.30382e-12 | 6.95927e-12 | 9.13353e-12 | 1.19872e-11 |
| 10.0000     | 1.64247e-11 | 1.92558e-11 | 2.26917e-11 | 2.68857e-11 | 3.20301e-11 |
| 1.00000     | 2.00006e-11 | 2.29878e-11 | 2.66067e-11 | 3.10127e-11 | 3.64009e-11 |
| 0.100000    | 2.04565e-11 | 2.34562e-11 | 2.70904e-11 | 3.15150e-11 | 3.69251e-11 |
| 0.0100000   | 2.05041e-11 | 2.35048e-11 | 2.71403e-11 | 3.15667e-11 | 3.69788e-11 |
| 0.00100000  | 2.05088e-11 | 2.35096e-11 | 2.71453e-11 | 3.15718e-11 | 3.69842e-11 |
| 0.000100000 | 2.05093e-11 | 2.35101e-11 | 2.71458e-11 | 3.15723e-11 | 3.69847e-11 |
| 1.00000e-05 | 2.05094e-11 | 2.35102e-11 | 2.71459e-11 | 3.15724e-11 | 3.69848e-11 |
| 1.00000e-06 | 2.05094e-11 | 2.35102e-11 | 2.71459e-11 | 3.15724e-11 | 3.69848e-11 |
| 1.00000e-07 | 2.05094e-11 | 2.35102e-11 | 2.71459e-11 | 3.15724e-11 | 3.69848e-11 |

|             |             |             |             |             |             |
|-------------|-------------|-------------|-------------|-------------|-------------|
| 1.00000e-08 | 2.05094e-11 | 2.35102e-11 | 2.71459e-11 | 3.15724e-11 | 3.69848e-11 |
| 1.00000e-09 | 2.05094e-11 | 2.35102e-11 | 2.71459e-11 | 3.15724e-11 | 3.69848e-11 |
| Pa\K        | 220.000     | 230.000     | 240.000     | 250.000     | 260.000     |
| 1.00000e+08 | 1.65648e-25 | 3.95477e-25 | 9.86886e-25 | 2.55173e-24 | 6.72112e-24 |
| 1.00000e+07 | 8.62344e-22 | 1.82905e-21 | 4.01092e-21 | 9.05442e-21 | 2.08308e-20 |
| 1.00000e+06 | 5.88982e-19 | 1.03559e-18 | 1.84135e-18 | 3.30653e-18 | 5.98446e-18 |
| 100000.     | 8.98962e-17 | 1.44691e-16 | 2.35233e-16 | 3.85759e-16 | 6.37052e-16 |
| 10000.0     | 9.19704e-15 | 1.45532e-14 | 2.32597e-14 | 3.74890e-14 | 6.08205e-14 |
| 1000.00     | 7.34978e-13 | 1.11491e-12 | 1.69608e-12 | 2.58239e-12 | 3.92735e-12 |
| 100.000     | 1.57276e-11 | 2.06208e-11 | 2.70073e-11 | 3.53206e-11 | 4.61099e-11 |
| 10.0000     | 3.83664e-11 | 4.61972e-11 | 5.59022e-11 | 6.79566e-11 | 8.29535e-11 |
| 1.00000     | 4.30156e-11 | 5.11627e-11 | 6.12251e-11 | 7.36816e-11 | 8.91293e-11 |
| 0.100000    | 4.35652e-11 | 5.17416e-11 | 6.18373e-11 | 7.43316e-11 | 8.98218e-11 |
| 0.0100000   | 4.36213e-11 | 5.18004e-11 | 6.18995e-11 | 7.43975e-11 | 8.98918e-11 |
| 0.00100000  | 4.36269e-11 | 5.18063e-11 | 6.19057e-11 | 7.44041e-11 | 8.98988e-11 |
| 0.000100000 | 4.36275e-11 | 5.18069e-11 | 6.19064e-11 | 7.44047e-11 | 8.98995e-11 |
| 1.00000e-05 | 4.36275e-11 | 5.18070e-11 | 6.19064e-11 | 7.44048e-11 | 8.98996e-11 |
| 1.00000e-06 | 4.36275e-11 | 5.18070e-11 | 6.19064e-11 | 7.44048e-11 | 8.98996e-11 |
| 1.00000e-07 | 4.36275e-11 | 5.18070e-11 | 6.19064e-11 | 7.44048e-11 | 8.98996e-11 |
| 1.00000e-08 | 4.36275e-11 | 5.18070e-11 | 6.19064e-11 | 7.44048e-11 | 8.98996e-11 |
| 1.00000e-09 | 4.36275e-11 | 5.18070e-11 | 6.19064e-11 | 7.44048e-11 | 8.98996e-11 |
| Pa\K        | 270.000     | 280.000     | 290.000     | 300.000     | 310.000     |
| 1.00000e+08 | 1.76469e-23 | 4.52136e-23 | 1.11110e-22 | 5.49659e-16 | 5.67087e-22 |
| 1.00000e+07 | 4.81144e-20 | 1.09698e-19 | 2.43014e-19 | 4.96612e-15 | 1.04499e-18 |
| 1.00000e+06 | 1.08853e-17 | 1.98198e-17 | 3.59466e-17 | 7.42166e-15 | 1.14268e-16 |
| 100000.     | 1.05726e-15 | 1.75897e-15 | 2.92512e-15 | 1.55976e-13 | 7.97368e-15 |
| 10000.0     | 9.91027e-14 | 1.61770e-13 | 2.63777e-13 | 6.84349e-12 | 6.90368e-13 |
| 1000.00     | 5.95441e-12 | 8.98340e-12 | 1.34631e-11 | 8.06934e-11 | 2.94445e-11 |
| 100.000     | 6.00679e-11 | 7.80616e-11 | 1.01168e-10 | 1.97287e-10 | 1.68264e-10 |
| 10.0000     | 1.01632e-10 | 1.24909e-10 | 1.53909e-10 | 2.32054e-10 | 2.34822e-10 |
| 1.00000     | 1.08311e-10 | 1.32147e-10 | 1.61768e-10 | 2.36710e-10 | 2.44120e-10 |
| 0.100000    | 1.09052e-10 | 1.32940e-10 | 1.62621e-10 | 2.37210e-10 | 2.45111e-10 |
| 0.0100000   | 1.09126e-10 | 1.33020e-10 | 1.62707e-10 | 2.37260e-10 | 2.45210e-10 |
| 0.00100000  | 1.09133e-10 | 1.33028e-10 | 1.62716e-10 | 2.37265e-10 | 2.45220e-10 |
| 0.000100000 | 1.09134e-10 | 1.33029e-10 | 1.62716e-10 | 2.37266e-10 | 2.45221e-10 |
| 1.00000e-05 | 1.09134e-10 | 1.33029e-10 | 1.62717e-10 | 2.37266e-10 | 2.45221e-10 |
| 1.00000e-06 | 1.09134e-10 | 1.33029e-10 | 1.62717e-10 | 2.37266e-10 | 2.45221e-10 |
| 1.00000e-07 | 1.09134e-10 | 1.33029e-10 | 1.62717e-10 | 2.37266e-10 | 2.45221e-10 |
| 1.00000e-08 | 1.09134e-10 | 1.33029e-10 | 1.62717e-10 | 2.37266e-10 | 2.45221e-10 |
| 1.00000e-09 | 1.09134e-10 | 1.33029e-10 | 1.62717e-10 | 2.37266e-10 | 2.45221e-10 |
| Pa\K        | 400.000     | 500.000     | 600.000     | 700.000     | 800.000     |
| 1.00000e+08 | 1.94727e-09 | 1.79034e-06 | 1.49306e-05 | 3.78511e-05 | 3.52068e-05 |
| 1.00000e+07 | 2.52808e-10 | 9.33755e-07 | 6.02401e-05 | 0.000286546 | 0.000391466 |
| 1.00000e+06 | 3.15191e-11 | 1.12374e-07 | 1.73772e-05 | 0.000167539 | 0.000419449 |
| 100000.     | 8.32465e-11 | 4.29354e-08 | 3.32079e-06 | 3.62431e-05 | 0.000148314 |
| 10000.0     | 5.98923e-10 | 2.69439e-08 | 5.77964e-07 | 4.97213e-06 | 2.85592e-05 |
| 1000.00     | 1.52245e-09 | 1.68782e-08 | 1.37363e-07 | 8.32129e-07 | 4.75832e-06 |
| 100.000     | 1.87825e-09 | 1.46791e-08 | 9.03029e-08 | 4.36468e-07 | 1.79267e-06 |
| 10.0000     | 1.93427e-09 | 1.44327e-08 | 8.56127e-08 | 3.97895e-07 | 1.48752e-06 |
| 1.00000     | 1.94075e-09 | 1.44080e-08 | 8.51440e-08 | 3.94051e-07 | 1.45710e-06 |
| 0.100000    | 1.94142e-09 | 1.44055e-08 | 8.50972e-08 | 3.93667e-07 | 1.45406e-06 |
| 0.0100000   | 1.94149e-09 | 1.44052e-08 | 8.50925e-08 | 3.93629e-07 | 1.45375e-06 |
| 0.00100000  | 1.94150e-09 | 1.44052e-08 | 8.50920e-08 | 3.93625e-07 | 1.45373e-06 |
| 0.000100000 | 1.94150e-09 | 1.44052e-08 | 8.50920e-08 | 3.93624e-07 | 1.45373e-06 |
| 1.00000e-05 | 1.94150e-09 | 1.44052e-08 | 8.50920e-08 | 3.93624e-07 | 1.45373e-06 |
| 1.00000e-06 | 1.94150e-09 | 1.44052e-08 | 8.50920e-08 | 3.93624e-07 | 1.45373e-06 |
| 1.00000e-07 | 1.94150e-09 | 1.44052e-08 | 8.50920e-08 | 3.93624e-07 | 1.45373e-06 |
| 1.00000e-08 | 1.94150e-09 | 1.44052e-08 | 8.50920e-08 | 3.93624e-07 | 1.45373e-06 |
| 1.00000e-09 | 1.94150e-09 | 1.44052e-08 | 8.50920e-08 | 3.93624e-07 | 1.45373e-06 |
| Pa\K        | 900.000     | 1000.00     | 1100.00     | 1200.00     | 1300.00     |
| 1.00000e+08 | 1.73792e-05 | 1.03890e-05 | 8.80762e-06 | 8.56814e-06 | 8.38219e-06 |
| 1.00000e+07 | 0.000291752 | 0.000207766 | 0.000175476 | 0.000162914 | 0.000155529 |
| 1.00000e+06 | 0.000565409 | 0.000596756 | 0.000586562 | 0.000567100 | 0.000544597 |
| 100000.     | 0.000352882 | 0.000512487 | 0.000562200 | 0.000551599 | 0.000519688 |
| 10000.0     | 0.000115305 | 0.000227347 | 0.000266414 | 0.000256372 | 0.000241491 |
| 1000.00     | 2.38209e-05 | 5.54010e-05 | 7.19118e-05 | 8.39665e-05 | 0.000107467 |
| 100.000     | 6.51730e-06 | 1.60995e-05 | 2.98041e-05 | 5.17567e-05 | 8.61192e-05 |
| 10.0000     | 4.61013e-06 | 1.17025e-05 | 2.52442e-05 | 4.84458e-05 | 8.40349e-05 |
| 1.00000     | 4.42489e-06 | 1.12887e-05 | 2.48196e-05 | 4.81400e-05 | 8.38448e-05 |
| 0.100000    | 4.40665e-06 | 1.12491e-05 | 2.47795e-05 | 4.81113e-05 | 8.38264e-05 |
| 0.0100000   | 4.40483e-06 | 1.12452e-05 | 2.47757e-05 | 4.81085e-05 | 8.38250e-05 |
| 0.00100000  | 4.40465e-06 | 1.12448e-05 | 2.47753e-05 | 4.81082e-05 | 8.38250e-05 |



|             |             |             |             |             |             |
|-------------|-------------|-------------|-------------|-------------|-------------|
| 0.000100000 | 4.40463e-06 | 1.12447e-05 | 2.47753e-05 | 4.81082e-05 | 8.38250e-05 |
| 1.00000e-05 | 4.40463e-06 | 1.12447e-05 | 2.47753e-05 | 4.81082e-05 | 8.38250e-05 |
| 1.00000e-06 | 4.40463e-06 | 1.12447e-05 | 2.47753e-05 | 4.81082e-05 | 8.38250e-05 |
| 1.00000e-07 | 4.40463e-06 | 1.12447e-05 | 2.47753e-05 | 4.81082e-05 | 8.38250e-05 |
| 1.00000e-08 | 4.40463e-06 | 1.12447e-05 | 2.47753e-05 | 4.81082e-05 | 8.38250e-05 |
| 1.00000e-09 | 4.40463e-06 | 1.12447e-05 | 2.47753e-05 | 4.81082e-05 | 8.38250e-05 |

| Pa\K        | 1400.00     | 1500.00     | 1750.00     | 2000.00     | 2250.00     |
|-------------|-------------|-------------|-------------|-------------|-------------|
| 1.00000e+08 | 7.46759e-06 | 5.64128e-06 | 0.000693988 | 0.000686829 | 0.000669186 |
| 1.00000e+07 | 0.000147410 | 0.000135616 | 0.00150161  | 0.00139388  | 0.00124636  |
| 1.00000e+06 | 0.000520880 | 0.000497087 | 0.00159320  | 0.00134526  | 0.00112711  |
| 100000.     | 0.000487069 | 0.000464568 | 0.000981580 | 0.000849959 | 0.000806886 |
| 10000.0     | 0.000243062 | 0.000266396 | 0.000504478 | 0.000611966 | 0.000704230 |
| 1000.00     | 0.000147515 | 0.000202833 | 0.000398092 | 0.000573482 | 0.000690935 |
| 100.000     | 0.000134367 | 0.000195155 | 0.000385851 | 0.000569507 | 0.000689646 |
| 10.0000     | 0.000133141 | 0.000194471 | 0.000384650 | 0.000569123 | 0.000689523 |
| 1.00000     | 0.000133030 | 0.000194410 | 0.000384533 | 0.000569085 | 0.000689514 |
| 0.100000    | 0.000133019 | 0.000194404 | 0.000384522 | 0.000569085 | 0.000689514 |
| 0.0100000   | 0.000133019 | 0.000194404 | 0.000384521 | 0.000569085 | 0.000689514 |
| 0.00100000  | 0.000133019 | 0.000194404 | 0.000384521 | 0.000569085 | 0.000689514 |
| 0.000100000 | 0.000133019 | 0.000194404 | 0.000384521 | 0.000569085 | 0.000689514 |
| 1.00000e-05 | 0.000133019 | 0.000194404 | 0.000384521 | 0.000569085 | 0.000689514 |
| 1.00000e-06 | 0.000133019 | 0.000194404 | 0.000384521 | 0.000569085 | 0.000689514 |
| 1.00000e-07 | 0.000133019 | 0.000194404 | 0.000384521 | 0.000569085 | 0.000689514 |
| 1.00000e-08 | 0.000133019 | 0.000194404 | 0.000384521 | 0.000569085 | 0.000689514 |
| 1.00000e-09 | 0.000133019 | 0.000194404 | 0.000384521 | 0.000569085 | 0.000689514 |

rad6

====

| Pa\K        | 20.0000     | 30.0000     | 40.0000     | 50.0000     | 60.0000     |
|-------------|-------------|-------------|-------------|-------------|-------------|
| 1.00000e+08 | 2.79979e-16 | 1.03543e-15 | 2.14986e-15 | 3.59551e-15 | 5.37464e-15 |
| 1.00000e+07 | 1.34708e-14 | 3.50944e-14 | 5.92245e-14 | 8.60341e-14 | 1.15968e-13 |
| 1.00000e+06 | 2.19086e-13 | 4.89672e-13 | 8.19670e-13 | 1.23857e-12 | 1.77318e-12 |
| 100000.     | 5.44781e-12 | 2.51268e-11 | 6.33201e-11 | 1.22110e-10 | 2.03418e-10 |
| 10000.0     | 8.57210e-10 | 3.53217e-09 | 7.58710e-09 | 1.27915e-08 | 1.90182e-08 |
| 1000.00     | 5.32302e-08 | 1.34459e-07 | 2.15045e-07 | 2.96105e-07 | 3.79356e-07 |
| 100.000     | 7.13859e-07 | 1.40811e-06 | 2.05881e-06 | 2.68293e-06 | 3.28766e-06 |
| 10.0000     | 5.14452e-06 | 7.39997e-06 | 8.46752e-06 | 9.06717e-06 | 9.44482e-06 |
| 1.00000     | 8.75088e-06 | 7.41591e-06 | 6.22076e-06 | 5.23747e-06 | 4.42562e-06 |
| 0.100000    | 1.81155e-06 | 4.30244e-07 | 1.38096e-07 | 5.34681e-08 | 2.35731e-08 |
| 0.0100000   | 1.12080e-09 | 3.26919e-11 | 3.89932e-12 | 8.52645e-13 | 2.61390e-13 |
| 0.00100000  | 6.13621e-15 | 1.57356e-16 | 2.09618e-17 | 5.23562e-18 | 1.82352e-18 |
| 0.000100000 | 7.05671e-20 | 3.17325e-21 | 5.85420e-22 | 1.83810e-22 | 7.64165e-23 |
| 1.00000e-05 | 5.15385e-24 | 3.92446e-25 | 9.63259e-26 | 3.67766e-26 | 1.77489e-26 |
| 1.00000e-06 | 1.90001e-27 | 2.22647e-28 | 6.89327e-29 | 3.08424e-29 | 1.67966e-29 |
| 1.00000e-07 | 2.62315e-30 | 4.37762e-31 | 1.64170e-31 | 8.37640e-32 | 5.04210e-32 |
| 1.00000e-08 | 1.08467e-32 | 2.44799e-33 | 1.08285e-33 | 6.18810e-34 | 4.05987e-34 |
| 1.00000e-09 | 1.16672e-34 | 3.46317e-35 | 1.78230e-35 | 1.13042e-35 | 8.02761e-36 |

| Pa\K        | 70.0000     | 80.0000     | 90.0000     | 100.000     | 110.000     |
|-------------|-------------|-------------|-------------|-------------|-------------|
| 1.00000e+08 | 7.51058e-15 | 1.00457e-14 | 1.30412e-14 | 1.65790e-14 | 2.07667e-14 |
| 1.00000e+07 | 1.49619e-13 | 1.87739e-13 | 2.31255e-13 | 2.81312e-13 | 3.39342e-13 |
| 1.00000e+06 | 2.45314e-12 | 3.31360e-12 | 4.39724e-12 | 5.75696e-12 | 7.45954e-12 |
| 100000.     | 3.09580e-10 | 4.43599e-10 | 6.09301e-10 | 8.11513e-10 | 1.05632e-09 |
| 10000.0     | 2.62071e-08 | 3.43478e-08 | 4.34681e-08 | 5.36289e-08 | 6.49236e-08 |
| 1000.00     | 4.66135e-07 | 5.57603e-07 | 6.54865e-07 | 7.59063e-07 | 8.71444e-07 |
| 100.000     | 3.87809e-06 | 4.45863e-06 | 5.03315e-06 | 5.60517e-06 | 6.17803e-06 |
| 10.0000     | 9.70279e-06 | 9.88985e-06 | 1.00313e-05 | 1.01411e-05 | 1.02272e-05 |
| 1.00000     | 3.74971e-06 | 3.18279e-06 | 2.70443e-06 | 2.29896e-06 | 1.95411e-06 |
| 0.100000    | 1.14375e-08 | 5.97272e-09 | 3.30584e-09 | 1.91810e-09 | 1.15712e-09 |
| 0.0100000   | 9.93522e-14 | 4.37962e-14 | 2.15080e-14 | 1.14650e-14 | 6.51697e-15 |
| 0.00100000  | 7.79884e-19 | 3.83225e-19 | 2.08085e-19 | 1.21802e-19 | 7.55936e-20 |
| 0.000100000 | 3.77857e-23 | 2.10119e-23 | 1.27162e-23 | 8.20394e-24 | 5.56528e-24 |
| 1.00000e-05 | 9.90683e-27 | 6.10452e-27 | 4.04109e-27 | 2.82533e-27 | 2.06315e-27 |
| 1.00000e-06 | 1.03411e-29 | 6.92380e-30 | 4.92846e-30 | 3.67769e-30 | 2.85157e-30 |
| 1.00000e-07 | 3.36678e-32 | 2.41419e-32 | 1.82413e-32 | 1.43557e-32 | 1.16840e-32 |
| 1.00000e-08 | 2.90523e-34 | 2.20667e-34 | 1.75069e-34 | 1.43632e-34 | 1.21080e-34 |
| 1.00000e-09 | 6.12194e-36 | 4.90205e-36 | 4.06691e-36 | 3.46577e-36 | 3.01687e-36 |

| Pa\K        | 120.000     | 130.000     | 140.000     | 150.000     | 160.000     |
|-------------|-------------|-------------|-------------|-------------|-------------|
| 1.00000e+08 | 2.57447e-14 | 3.16956e-14 | 3.88572e-14 | 4.75396e-14 | 5.81473e-14 |
| 1.00000e+07 | 4.07163e-13 | 4.87104e-13 | 5.82161e-13 | 6.96214e-13 | 8.34296e-13 |
| 1.00000e+06 | 9.59051e-12 | 1.22607e-11 | 1.56152e-11 | 1.98450e-11 | 2.52036e-11 |
| 100000.     | 1.35139e-09 | 1.70646e-09 | 2.13383e-09 | 2.64914e-09 | 3.27223e-09 |
| 10000.0     | 7.74800e-08 | 9.14648e-08 | 1.07089e-07 | 1.24617e-07 | 1.44368e-07 |
| 1000.00     | 9.93427e-07 | 1.12666e-06 | 1.27306e-06 | 1.43490e-06 | 1.61479e-06 |

|             |             |             |             |             |             |
|-------------|-------------|-------------|-------------|-------------|-------------|
| 100.000     | 6.75501e-06 | 7.33947e-06 | 7.93481e-06 | 8.54452e-06 | 9.17208e-06 |
| 10.0000     | 1.02941e-05 | 1.03444e-05 | 1.03791e-05 | 1.03982e-05 | 1.04011e-05 |
| 1.00000     | 1.66013e-06 | 1.40912e-06 | 1.19461e-06 | 1.01125e-06 | 8.54556e-07 |
| 0.100000    | 7.21222e-10 | 4.62169e-10 | 3.03283e-10 | 2.03142e-10 | 1.38514e-10 |
| 0.0100000   | 3.90046e-15 | 2.43517e-15 | 1.57472e-15 | 1.04894e-15 | 7.16604e-16 |
| 0.00100000  | 4.91678e-20 | 3.32340e-20 | 2.32001e-20 | 1.66494e-20 | 1.22417e-20 |
| 0.000100000 | 3.93231e-24 | 2.87511e-24 | 2.16564e-24 | 1.67610e-24 | 1.33173e-24 |
| 1.00000e-05 | 1.56210e-27 | 1.22077e-27 | 9.82548e-28 | 8.14647e-28 | 6.97939e-28 |
| 1.00000e-06 | 2.28515e-30 | 1.88788e-30 | 1.60838e-30 | 1.41806e-30 | 1.30389e-30 |
| 1.00000e-07 | 9.79606e-33 | 8.45136e-33 | 7.51709e-33 | 6.93235e-33 | 6.69922e-33 |
| 1.00000e-08 | 1.04466e-34 | 9.20749e-35 | 8.29178e-35 | 7.64845e-35 | 7.28167e-35 |
| 1.00000e-09 | 2.67139e-36 | 2.40089e-36 | 2.18479e-36 | 2.01257e-36 | 1.87943e-36 |

| Pa\K        | 170.000     | 180.000     | 190.000     | 200.000     | 210.000     |
|-------------|-------------|-------------|-------------|-------------|-------------|
| 1.00000e+08 | 7.12087e-14 | 8.74146e-14 | 1.07669e-13 | 1.33161e-13 | 1.65447e-13 |
| 1.00000e+07 | 1.00297e-12 | 1.21079e-12 | 1.46902e-12 | 1.79251e-12 | 2.20100e-12 |
| 1.00000e+06 | 3.20285e-11 | 4.07714e-11 | 5.20390e-11 | 6.66497e-11 | 8.57115e-11 |
| 100000.     | 4.02826e-09 | 4.94912e-09 | 6.07515e-09 | 7.45740e-09 | 9.16027e-09 |
| 10000.0     | 1.66739e-07 | 1.92205e-07 | 2.21341e-07 | 2.54838e-07 | 2.93528e-07 |
| 1000.00     | 1.81583e-06 | 2.04155e-06 | 2.29605e-06 | 2.58403e-06 | 2.91078e-06 |
| 100.000     | 9.82101e-06 | 1.04946e-05 | 1.11963e-05 | 1.19290e-05 | 1.26952e-05 |
| 10.0000     | 1.03867e-05 | 1.03528e-05 | 1.02978e-05 | 1.02190e-05 | 1.01142e-05 |
| 1.00000     | 7.20746e-07 | 6.06607e-07 | 5.09396e-07 | 4.26756e-07 | 3.56652e-07 |
| 0.100000    | 9.59288e-11 | 6.73509e-11 | 4.78601e-11 | 3.43748e-11 | 2.49248e-11 |
| 0.0100000   | 5.00336e-16 | 3.56096e-16 | 2.57723e-16 | 1.89364e-16 | 1.41074e-16 |
| 0.00100000  | 9.20130e-21 | 7.06158e-21 | 5.53375e-21 | 4.43501e-21 | 3.64852e-21 |
| 0.000100000 | 1.08753e-24 | 9.16153e-25 | 8.01716e-25 | 7.36801e-25 | 7.21820e-25 |
| 1.00000e-05 | 6.22020e-28 | 5.83122e-28 | 5.84094e-28 | 6.36771e-28 | 7.68506e-28 |
| 1.00000e-06 | 1.26628e-30 | 1.32195e-30 | 1.51355e-30 | 1.93402e-30 | 2.78636e-30 |
| 1.00000e-07 | 6.89380e-33 | 7.71921e-33 | 9.61519e-33 | 1.35756e-32 | 2.20008e-32 |
| 1.00000e-08 | 7.24309e-35 | 7.71573e-35 | 9.15688e-35 | 1.28227e-34 | 2.28032e-34 |
| 1.00000e-09 | 1.79039e-36 | 1.77552e-36 | 1.94729e-36 | 2.72295e-36 | 5.71510e-36 |

| Pa\K        | 220.000     | 230.000     | 240.000     | 250.000     | 260.000     |
|-------------|-------------|-------------|-------------|-------------|-------------|
| 1.00000e+08 | 2.06582e-13 | 2.59271e-13 | 3.27092e-13 | 4.14779e-13 | 5.28604e-13 |
| 1.00000e+07 | 2.72093e-12 | 3.38806e-12 | 4.25150e-12 | 5.37971e-12 | 6.86994e-12 |
| 1.00000e+06 | 1.10730e-10 | 1.43760e-10 | 1.87614e-10 | 2.46163e-10 | 3.24738e-10 |
| 100000.     | 1.12650e-08 | 1.38736e-08 | 1.71145e-08 | 2.11485e-08 | 2.61767e-08 |
| 10000.0     | 3.38407e-07 | 3.90673e-07 | 4.51756e-07 | 5.23376e-07 | 6.07584e-07 |
| 1000.00     | 3.28235e-06 | 3.70546e-06 | 4.18765e-06 | 4.73721e-06 | 5.36330e-06 |
| 100.000     | 1.34972e-05 | 1.43366e-05 | 1.52143e-05 | 1.61303e-05 | 1.70836e-05 |
| 10.0000     | 9.98137e-06 | 9.81848e-06 | 9.62413e-06 | 9.39755e-06 | 9.13868e-06 |
| 1.00000     | 2.97321e-07 | 2.47236e-07 | 2.05071e-07 | 1.69670e-07 | 1.40036e-07 |
| 0.100000    | 1.82266e-11 | 1.34306e-11 | 9.96487e-12 | 7.44000e-12 | 5.58698e-12 |
| 0.0100000   | 1.06480e-16 | 8.14059e-17 | 6.30714e-17 | 4.95965e-17 | 3.97003e-17 |
| 0.00100000  | 3.10096e-21 | 2.75029e-21 | 2.58080e-21 | 2.60436e-21 | 2.86985e-21 |
| 0.000100000 | 7.66830e-25 | 8.97172e-25 | 1.16679e-24 | 1.68884e-24 | 2.70700e-24 |
| 1.00000e-05 | 1.03795e-27 | 1.57378e-27 | 2.67484e-27 | 5.08160e-27 | 1.07403e-26 |
| 1.00000e-06 | 4.54111e-30 | 8.38317e-30 | 1.75673e-29 | 4.17341e-29 | 1.11078e-28 |
| 1.00000e-07 | 4.13044e-32 | 9.05953e-32 | 2.32094e-31 | 6.81971e-31 | 2.22049e-30 |
| 1.00000e-08 | 5.25969e-34 | 1.53223e-33 | 5.21897e-33 | 1.94540e-32 | 7.58033e-32 |
| 1.00000e-09 | 1.73995e-35 | 6.45039e-35 | 2.60054e-34 | 1.07693e-33 | 4.51315e-33 |

| Pa\K        | 270.000     | 280.000     | 290.000     | 300.000     | 310.000     |
|-------------|-------------|-------------|-------------|-------------|-------------|
| 1.00000e+08 | 6.76886e-13 | 8.70644e-13 | 1.12443e-12 | 8.06883e-12 | 1.89362e-12 |
| 1.00000e+07 | 8.86269e-12 | 1.15630e-11 | 1.52697e-11 | 3.16361e-10 | 2.75676e-11 |
| 1.00000e+06 | 4.30708e-10 | 5.74248e-10 | 7.69332e-10 | 6.05332e-09 | 1.39631e-09 |
| 100000.     | 3.24498e-08 | 4.02790e-08 | 5.00493e-08 | 1.74279e-07 | 7.73931e-08 |
| 10000.0     | 7.06839e-07 | 8.24067e-07 | 9.62744e-07 | 2.19178e-06 | 1.32139e-06 |
| 1000.00     | 6.07582e-06 | 6.88543e-06 | 7.80349e-06 | 1.27721e-05 | 1.00114e-05 |
| 100.000     | 1.80723e-05 | 1.90927e-05 | 2.01402e-05 | 2.14180e-05 | 2.22857e-05 |
| 10.0000     | 8.84826e-06 | 8.52789e-06 | 8.17999e-06 | 6.61772e-06 | 7.41382e-06 |
| 1.00000     | 1.15298e-07 | 9.47096e-08 | 7.76226e-08 | 8.33838e-08 | 5.18038e-08 |
| 0.100000    | 4.21803e-12 | 3.20067e-12 | 2.44062e-12 | 2.42118e-11 | 1.44003e-12 |
| 0.0100000   | 3.25133e-17 | 2.74605e-17 | 2.41944e-17 | 4.43647e-15 | 2.26222e-17 |
| 0.00100000  | 3.48552e-21 | 4.66569e-21 | 6.82478e-21 | 4.44039e-18 | 1.80400e-20 |
| 0.000100000 | 4.76564e-24 | 9.12160e-24 | 1.87444e-23 | 2.13746e-20 | 9.20499e-23 |
| 1.00000e-05 | 2.49996e-26 | 6.29673e-26 | 1.67791e-25 | 2.43879e-22 | 1.29118e-24 |
| 1.00000e-06 | 3.23364e-28 | 9.99411e-28 | 3.18927e-27 | 4.38864e-24 | 3.29103e-26 |
| 1.00000e-07 | 7.70686e-30 | 2.76090e-29 | 9.97126e-29 | 8.80437e-26 | 1.25389e-27 |
| 1.00000e-08 | 3.00754e-31 | 1.19277e-30 | 4.67354e-30 | 2.79884e-27 | 6.68194e-29 |
| 1.00000e-09 | 1.88964e-32 | 7.82987e-32 | 3.18506e-31 | 1.79028e-28 | 4.85077e-30 |

| Pa\K        | 400.000     | 500.000     | 600.000     | 700.000     | 800.000     |
|-------------|-------------|-------------|-------------|-------------|-------------|
| 1.00000e+08 | 2.87308e-07 | 6.66562e-05 | 0.000347287 | 0.000691905 | 0.000650118 |
| 1.00000e+07 | 2.54529e-07 | 3.56991e-05 | 0.000476350 | 0.00111564  | 0.00110745  |

|             |             |             |             |             |             |
|-------------|-------------|-------------|-------------|-------------|-------------|
| 1.00000e+06 | 2.83457e-07 | 1.59479e-05 | 0.000249353 | 0.000652418 | 0.000528432 |
| 100000.     | 1.83213e-06 | 2.55942e-05 | 0.000208899 | 0.000470736 | 0.000376189 |
| 10000.0     | 1.25061e-05 | 6.34738e-05 | 0.000184989 | 0.000254820 | 0.000197489 |
| 1000.00     | 3.61469e-05 | 7.35416e-05 | 9.52876e-05 | 7.93696e-05 | 4.96023e-05 |
| 100.000     | 2.83411e-05 | 2.53756e-05 | 1.50872e-05 | 6.65432e-06 | 2.67236e-06 |
| 10.0000     | 3.22535e-06 | 1.08235e-06 | 2.93372e-07 | 7.91584e-08 | 2.72890e-08 |
| 1.00000     | 1.44275e-08 | 2.58945e-09 | 1.08210e-09 | 1.05980e-09 | 8.67687e-10 |
| 0.100000    | 4.39275e-12 | 9.33638e-12 | 4.34984e-11 | 8.31243e-11 | 8.15887e-11 |
| 0.0100000   | 1.28607e-14 | 3.04778e-13 | 2.57210e-12 | 6.13717e-12 | 6.66430e-12 |
| 0.00100000  | 1.93691e-16 | 1.16329e-14 | 1.49103e-13 | 4.17611e-13 | 4.86677e-13 |
| 0.000100000 | 4.38914e-18 | 5.02559e-16 | 8.69761e-15 | 2.71313e-14 | 3.30975e-14 |
| 1.00000e-05 | 1.36022e-19 | 2.32498e-17 | 4.81817e-16 | 1.59397e-15 | 1.99411e-15 |
| 1.00000e-06 | 4.94158e-21 | 9.27924e-19 | 1.93151e-17 | 6.33246e-17 | 7.95632e-17 |
| 1.00000e-07 | 1.95163e-22 | 2.62275e-20 | 3.74764e-19 | 1.10389e-18 | 1.40094e-18 |
| 1.00000e-08 | 1.21137e-23 | 1.29466e-21 | 9.30614e-21 | 1.91069e-20 | 2.41364e-20 |
| 1.00000e-09 | 1.00146e-24 | 1.10044e-22 | 6.93558e-22 | 1.22971e-21 | 1.50493e-21 |

| Pa\K        | 900.000     | 1000.00     | 1100.00     | 1200.00     | 1300.00     |
|-------------|-------------|-------------|-------------|-------------|-------------|
| 1.00000e+08 | 0.000359683 | 0.000223528 | 0.000171606 | 0.000140524 | 0.000110201 |
| 1.00000e+07 | 0.000751201 | 0.000511032 | 0.000403965 | 0.000356300 | 0.000326031 |
| 1.00000e+06 | 0.000342291 | 0.000262484 | 0.000222512 | 0.000204001 | 0.000199402 |
| 100000.     | 0.000210830 | 0.000137262 | 0.000110436 | 9.67899e-05 | 8.94681e-05 |
| 10000.0     | 0.000120540 | 7.58362e-05 | 5.12767e-05 | 3.67213e-05 | 2.89422e-05 |
| 1000.00     | 2.53727e-05 | 1.23454e-05 | 6.35344e-06 | 3.77615e-06 | 2.75644e-06 |
| 100.000     | 9.70066e-07 | 3.73614e-07 | 1.75331e-07 | 1.14412e-07 | 1.02505e-07 |
| 10.0000     | 1.05687e-08 | 5.10473e-09 | 3.37310e-09 | 3.28874e-09 | 4.08139e-09 |
| 1.00000     | 5.31137e-10 | 3.23024e-10 | 2.28254e-10 | 2.17401e-10 | 2.71421e-10 |
| 0.100000    | 5.30803e-11 | 3.25267e-11 | 2.19424e-11 | 1.88854e-11 | 2.18889e-11 |
| 0.0100000   | 4.54134e-12 | 2.83027e-12 | 1.90022e-12 | 1.57878e-12 | 1.76133e-12 |
| 0.00100000  | 3.43981e-13 | 2.18538e-13 | 1.48371e-13 | 1.22985e-13 | 1.35983e-13 |
| 0.000100000 | 2.40148e-14 | 1.55363e-14 | 1.07380e-14 | 9.03233e-15 | 1.00747e-14 |
| 1.00000e-05 | 1.47048e-15 | 9.67705e-16 | 6.87086e-16 | 6.01504e-16 | 6.97920e-16 |
| 1.00000e-06 | 5.90606e-17 | 3.98386e-17 | 3.03257e-17 | 3.05643e-17 | 4.12715e-17 |
| 1.00000e-07 | 1.09736e-18 | 8.24416e-19 | 8.28456e-19 | 1.27646e-18 | 2.33293e-18 |
| 1.00000e-08 | 2.29438e-20 | 2.25677e-20 | 3.62759e-20 | 8.05239e-20 | 1.69182e-19 |
| 1.00000e-09 | 1.54491e-21 | 1.65136e-21 | 2.94673e-21 | 6.85787e-21 | 1.44674e-20 |

| Pa\K        | 1400.00     | 1500.00     | 1750.00     | 2000.00     | 2250.00     |
|-------------|-------------|-------------|-------------|-------------|-------------|
| 1.00000e+08 | 8.69619e-05 | 8.05139e-05 | 5.43073e-05 | 6.02379e-05 | 7.40648e-05 |
| 1.00000e+07 | 0.000310859 | 0.000343994 | 5.35388e-05 | 5.92642e-05 | 6.63965e-05 |
| 1.00000e+06 | 0.000210917 | 0.000248100 | 9.35697e-05 | 7.77686e-05 | 5.68025e-05 |
| 100000.     | 9.16839e-05 | 0.000105412 | 9.00541e-05 | 4.60708e-05 | 2.03197e-05 |
| 10000.0     | 2.63641e-05 | 2.75489e-05 | 2.53357e-05 | 9.18786e-06 | 3.02825e-06 |
| 1000.00     | 2.46594e-06 | 2.58252e-06 | 2.89661e-06 | 1.00072e-06 | 3.10186e-07 |
| 100.000     | 1.10280e-07 | 1.33620e-07 | 2.43804e-07 | 9.40337e-08 | 2.97935e-08 |
| 10.0000     | 5.26436e-09 | 7.07352e-09 | 2.01509e-08 | 8.79767e-09 | 2.87219e-09 |
| 1.00000     | 3.54361e-10 | 4.70063e-10 | 1.72850e-09 | 8.34334e-10 | 2.79229e-10 |
| 0.100000    | 2.78326e-11 | 3.57262e-11 | 1.53450e-10 | 8.00426e-11 | 2.73138e-11 |
| 0.0100000   | 2.21345e-12 | 2.79885e-12 | 1.39677e-11 | 7.74181e-12 | 2.68265e-12 |
| 0.00100000  | 1.71422e-13 | 2.17184e-13 | 1.29442e-12 | 7.53287e-13 | 2.64257e-13 |
| 0.000100000 | 1.28515e-14 | 1.65134e-14 | 1.21879e-13 | 7.37110e-14 | 2.61104e-14 |
| 1.00000e-05 | 9.18374e-16 | 1.21930e-15 | 1.16323e-14 | 7.24827e-15 | 2.58686e-15 |
| 1.00000e-06 | 5.99139e-17 | 8.58538e-17 | 1.12285e-15 | 7.15739e-16 | 2.56889e-16 |
| 1.00000e-07 | 3.91702e-18 | 6.20650e-18 | 1.09835e-16 | 7.10166e-17 | 2.55795e-17 |
| 1.00000e-08 | 2.99892e-19 | 5.02922e-19 | 1.07486e-17 | 7.04707e-18 | 2.54735e-18 |
| 1.00000e-09 | 2.57383e-20 | 4.44355e-20 | 1.06526e-18 | 7.02579e-19 | 2.54343e-19 |

PAH3+H

=====

| Pa\K        | 20.0000     | 30.0000     | 40.0000     | 50.0000     | 60.0000     |
|-------------|-------------|-------------|-------------|-------------|-------------|
| 1.00000e+08 | 5.23855e-32 | 1.56394e-30 | 1.08075e-29 | 4.25342e-29 | 1.24497e-28 |
| 1.00000e+07 | 2.55017e-27 | 5.60712e-26 | 3.17205e-25 | 1.08097e-24 | 2.83241e-24 |
| 1.00000e+06 | 4.19930e-23 | 7.09445e-22 | 3.53682e-21 | 1.10780e-20 | 2.71782e-20 |
| 100000.     | 3.20659e-19 | 3.93434e-18 | 1.52758e-17 | 3.85993e-17 | 7.81518e-17 |
| 10000.0     | 4.37912e-16 | 2.08549e-15 | 4.49603e-15 | 7.47889e-15 | 1.10022e-14 |
| 1000.00     | 2.43098e-14 | 5.67640e-14 | 9.12615e-14 | 1.28991e-13 | 1.70823e-13 |
| 100.000     | 2.96279e-13 | 5.91943e-13 | 8.82388e-13 | 1.18057e-12 | 1.49286e-12 |
| 10.0000     | 2.16857e-12 | 3.34655e-12 | 4.14159e-12 | 4.79081e-12 | 5.37843e-12 |
| 1.00000     | 5.38102e-12 | 5.96165e-12 | 6.36783e-12 | 6.77478e-12 | 7.20572e-12 |
| 0.100000    | 6.41369e-12 | 6.66674e-12 | 6.95608e-12 | 7.30106e-12 | 7.69268e-12 |
| 0.0100000   | 6.68358e-12 | 6.82405e-12 | 7.06954e-12 | 7.39163e-12 | 7.76934e-12 |
| 0.00100000  | 6.71771e-12 | 6.84133e-12 | 7.08150e-12 | 7.40101e-12 | 7.77720e-12 |
| 0.000100000 | 6.72117e-12 | 6.84307e-12 | 7.08270e-12 | 7.40195e-12 | 7.77799e-12 |
| 1.00000e-05 | 6.72151e-12 | 6.84324e-12 | 7.08282e-12 | 7.40205e-12 | 7.77807e-12 |
| 1.00000e-06 | 6.72155e-12 | 6.84326e-12 | 7.08284e-12 | 7.40206e-12 | 7.77808e-12 |
| 1.00000e-07 | 6.72155e-12 | 6.84326e-12 | 7.08284e-12 | 7.40206e-12 | 7.77808e-12 |
| 1.00000e-08 | 6.72155e-12 | 6.84326e-12 | 7.08284e-12 | 7.40206e-12 | 7.77808e-12 |

1.00000e-09 | 6.72155e-12 6.84326e-12 7.08284e-12 7.40206e-12 7.77808e-12

Pa\K | 70.0000 80.0000 90.0000 100.000 110.000

-----  
1.00000e+08 | 3.04496e-28 6.61905e-28 1.32673e-27 2.51164e-27 4.56698e-27  
1.00000e+07 | 6.33677e-24 1.27879e-23 2.40486e-23 4.30438e-23 7.44207e-23  
1.00000e+06 | 5.74779e-20 1.10224e-19 1.97513e-19 3.37228e-19 5.56083e-19  
100000. | 1.38586e-16 2.25408e-16 3.45449e-16 5.07431e-16 7.22739e-16  
10000.0 | 1.51054e-14 1.98731e-14 2.54272e-14 3.19298e-14 3.95917e-14  
1000.00 | 2.17685e-13 2.70681e-13 3.31138e-13 4.00685e-13 4.81357e-13  
100.000 | 1.82474e-12 2.18191e-12 2.57060e-12 2.99782e-12 3.47182e-12  
10.0000 | 5.94599e-12 6.51897e-12 7.11550e-12 7.75053e-12 8.43822e-12  
1.00000 | 7.67027e-12 8.17654e-12 8.73263e-12 9.34740e-12 1.00312e-11  
0.100000 | 8.15671e-12 9.15671e-12 9.75979e-12 1.04347e-11  
0.0100000 | 8.19717e-12 8.67671e-12 9.21271e-12 9.81214e-12 1.04842e-11  
0.00100000 | 8.20404e-12 8.68289e-12 9.21838e-12 9.81743e-12 1.04892e-11  
0.000100000 | 8.20473e-12 8.68351e-12 9.21895e-12 9.81796e-12 1.04897e-11  
1.00000e-05 | 8.20480e-12 8.68357e-12 9.21901e-12 9.81801e-12 1.04898e-11  
1.00000e-06 | 8.20481e-12 8.68358e-12 9.21901e-12 9.81802e-12 1.04898e-11  
1.00000e-07 | 8.20481e-12 8.68358e-12 9.21902e-12 9.81802e-12 1.04898e-11  
1.00000e-08 | 8.20481e-12 8.68358e-12 9.21902e-12 9.81802e-12 1.04898e-11  
1.00000e-09 | 8.20481e-12 8.68358e-12 9.21902e-12 9.81802e-12 1.04898e-11

Pa\K | 120.000 130.000 140.000 150.000 160.000

-----  
1.00000e+08 | 8.07712e-27 1.40328e-26 2.41455e-26 4.14331e-26 7.13381e-26  
1.00000e+07 | 1.25675e-22 2.09106e-22 3.45285e-22 5.69297e-22 9.42237e-22  
1.00000e+06 | 8.94490e-19 1.41438e-18 2.21190e-18 3.43804e-18 5.33254e-18  
100000. | 1.00647e-15 1.37893e-15 1.86759e-15 2.50998e-15 3.35752e-15  
10000.0 | 4.86879e-14 5.95777e-14 7.27324e-14 8.87728e-14 1.08518e-13  
1000.00 | 5.75736e-13 6.87127e-13 8.19786e-13 9.79214e-13 1.17252e-12  
100.000 | 4.00250e-12 4.60192e-12 5.28486e-12 6.06946e-12 6.97790e-12  
10.0000 | 9.19338e-12 1.00326e-11 1.09751e-11 1.20435e-11 1.32647e-11  
1.00000 | 1.07966e-11 1.16587e-11 1.26360e-11 1.37510e-11 1.50306e-11  
0.100000 | 1.11933e-11 1.20507e-11 1.30249e-11 1.41383e-11 1.54178e-11  
0.0100000 | 1.12407e-11 1.20963e-11 1.30693e-11 1.41817e-11 1.54605e-11  
0.00100000 | 1.12455e-11 1.21009e-11 1.30737e-11 1.41861e-11 1.54648e-11  
0.000100000 | 1.12460e-11 1.21014e-11 1.30742e-11 1.41865e-11 1.54652e-11  
1.00000e-05 | 1.12460e-11 1.21014e-11 1.30742e-11 1.41865e-11 1.54653e-11  
1.00000e-06 | 1.12460e-11 1.21014e-11 1.30742e-11 1.41866e-11 1.54653e-11  
1.00000e-07 | 1.12460e-11 1.21014e-11 1.30742e-11 1.41866e-11 1.54653e-11  
1.00000e-08 | 1.12460e-11 1.21014e-11 1.30742e-11 1.41866e-11 1.54653e-11  
1.00000e-09 | 1.12460e-11 1.21014e-11 1.30742e-11 1.41866e-11 1.54653e-11

Pa\K | 170.000 180.000 190.000 200.000 210.000

-----  
1.00000e+08 | 1.23916e-25 2.18251e-25 3.91659e-25 7.19676e-25 1.36135e-24  
1.00000e+07 | 1.57281e-21 2.65900e-21 4.57043e-21 8.01657e-21 1.44013e-20  
1.00000e+06 | 8.27968e-18 1.29008e-17 2.02078e-17 3.18604e-17 5.05949e-17  
100000. | 4.48093e-15 5.97778e-15 7.98295e-15 1.06833e-14 1.43379e-14  
10000.0 | 1.33052e-13 1.63815e-13 2.02722e-13 2.52332e-13 3.16069e-13  
1000.00 | 1.40894e-12 1.70041e-12 2.06243e-12 2.51513e-12 3.08459e-12  
100.000 | 8.03732e-12 9.28096e-12 1.07493e-11 1.24918e-11 1.45688e-11  
10.0000 | 1.46712e-11 1.63019e-11 1.82035e-11 2.04323e-11 2.30564e-11  
1.00000 | 1.65076e-11 1.82214e-11 2.02193e-11 2.25584e-11 2.53072e-11  
0.100000 | 1.68961e-11 1.86124e-11 2.06142e-11 2.29586e-11 2.57140e-11  
0.0100000 | 1.69384e-11 1.86545e-11 2.06563e-11 2.30008e-11 2.57566e-11  
0.00100000 | 1.69426e-11 1.86587e-11 2.06605e-11 2.30050e-11 2.57608e-11  
0.000100000 | 1.69430e-11 1.86591e-11 2.06609e-11 2.30054e-11 2.57613e-11  
1.00000e-05 | 1.69431e-11 1.86591e-11 2.06610e-11 2.30055e-11 2.57613e-11  
1.00000e-06 | 1.69431e-11 1.86591e-11 2.06610e-11 2.30055e-11 2.57613e-11  
1.00000e-07 | 1.69431e-11 1.86591e-11 2.06610e-11 2.30055e-11 2.57613e-11  
1.00000e-08 | 1.69431e-11 1.86591e-11 2.06610e-11 2.30055e-11 2.57613e-11  
1.00000e-09 | 1.69431e-11 1.86591e-11 2.06610e-11 2.30055e-11 2.57613e-11

Pa\K | 220.000 230.000 240.000 250.000 260.000

-----  
1.00000e+08 | 2.66691e-24 5.44428e-24 1.16347e-23 2.60189e-23 6.03669e-23  
1.00000e+07 | 2.65974e-20 5.06865e-20 9.99428e-20 2.03898e-19 4.28308e-19  
1.00000e+06 | 8.09470e-17 1.30463e-16 2.11736e-16 3.45799e-16 5.67723e-16  
100000. | 1.93072e-14 2.60923e-14 3.53913e-14 4.81766e-14 6.58028e-14  
10000.0 | 3.98520e-13 5.05861e-13 6.46399e-13 8.31333e-13 1.07575e-12  
1000.00 | 3.80463e-12 4.71904e-12 5.88439e-12 7.37361e-12 9.28042e-12  
100.000 | 1.70535e-11 2.00354e-11 2.36234e-11 2.79494e-11 3.31743e-11  
10.0000 | 2.61576e-11 2.98350e-11 3.42077e-11 3.94201e-11 4.56451e-11  
1.00000 | 2.85487e-11 3.23820e-11 3.69272e-11 4.23286e-11 4.87599e-11  
0.100000 | 2.89632e-11 3.28058e-11 3.73616e-11 4.27750e-11 4.92198e-11  
0.0100000 | 2.90063e-11 3.28496e-11 3.74063e-11 4.28208e-11 4.92667e-11  
0.00100000 | 2.90106e-11 3.28540e-11 3.74108e-11 4.28254e-11 4.92714e-11  
0.000100000 | 2.90111e-11 3.28545e-11 3.74112e-11 4.28258e-11 4.92718e-11

|             |             |             |             |             |             |
|-------------|-------------|-------------|-------------|-------------|-------------|
| 1.00000e-05 | 2.90111e-11 | 3.28545e-11 | 3.74113e-11 | 4.28259e-11 | 4.92719e-11 |
| 1.00000e-06 | 2.90111e-11 | 3.28545e-11 | 3.74113e-11 | 4.28259e-11 | 4.92719e-11 |
| 1.00000e-07 | 2.90111e-11 | 3.28545e-11 | 3.74113e-11 | 4.28259e-11 | 4.92719e-11 |
| 1.00000e-08 | 2.90111e-11 | 3.28545e-11 | 3.74113e-11 | 4.28259e-11 | 4.92719e-11 |
| 1.00000e-09 | 2.90111e-11 | 3.28545e-11 | 3.74113e-11 | 4.28259e-11 | 4.92719e-11 |

| Pa\K        | 270.000     | 280.000     | 290.000     | 300.000     | 310.000     |
|-------------|-------------|-------------|-------------|-------------|-------------|
| 1.00000e+08 | 1.42876e-22 | 3.37681e-22 | 7.80709e-22 | 1.20894e-15 | 3.67616e-21 |
| 1.00000e+07 | 9.16506e-19 | 1.96773e-18 | 4.16951e-18 | 2.82508e-14 | 1.70225e-17 |
| 1.00000e+06 | 9.35627e-16 | 1.54466e-15 | 2.54767e-15 | 1.19552e-13 | 6.81199e-15 |
| 100000.     | 9.01528e-14 | 1.23835e-13 | 1.70438e-13 | 1.24727e-12 | 3.23617e-13 |
| 10000.0     | 1.39998e-12 | 1.83125e-12 | 2.40589e-12 | 1.11902e-11 | 4.19129e-12 |
| 1000.00     | 1.17246e-11 | 1.48583e-11 | 1.88731e-11 | 5.00798e-11 | 3.05508e-11 |
| 100.000     | 3.94923e-11 | 4.71384e-11 | 5.63943e-11 | 8.51592e-11 | 8.11258e-11 |
| 10.0000     | 5.30913e-11 | 6.20082e-11 | 7.26932e-11 | 9.55655e-11 | 1.00818e-10 |
| 1.00000     | 5.64295e-11 | 6.55869e-11 | 7.65294e-11 | 9.81093e-11 | 1.05218e-10 |
| 0.100000    | 5.69043e-11 | 6.60781e-11 | 7.70384e-11 | 9.84348e-11 | 1.05767e-10 |
| 0.0100000   | 5.69526e-11 | 6.61279e-11 | 7.70899e-11 | 9.84678e-11 | 1.05822e-10 |
| 0.00100000  | 5.69574e-11 | 6.61329e-11 | 7.70950e-11 | 9.84711e-11 | 1.05827e-10 |
| 0.000100000 | 5.69579e-11 | 6.61334e-11 | 7.70955e-11 | 9.84715e-11 | 1.05828e-10 |
| 1.00000e-05 | 5.69579e-11 | 6.61334e-11 | 7.70956e-11 | 9.84715e-11 | 1.05828e-10 |
| 1.00000e-06 | 5.69580e-11 | 6.61334e-11 | 7.70956e-11 | 9.84715e-11 | 1.05828e-10 |
| 1.00000e-07 | 5.69580e-11 | 6.61334e-11 | 7.70956e-11 | 9.84715e-11 | 1.05828e-10 |
| 1.00000e-08 | 5.69580e-11 | 6.61334e-11 | 7.70956e-11 | 9.84715e-11 | 1.05828e-10 |
| 1.00000e-09 | 5.69580e-11 | 6.61334e-11 | 7.70956e-11 | 9.84715e-11 | 1.05828e-10 |

| Pa\K        | 400.000     | 500.000     | 600.000     | 700.000     | 800.000     |
|-------------|-------------|-------------|-------------|-------------|-------------|
| 1.00000e+08 | 1.78065e-09 | 1.10972e-06 | 7.85221e-06 | 1.84897e-05 | 1.82558e-05 |
| 1.00000e+07 | 2.63173e-10 | 2.89593e-07 | 1.48829e-05 | 6.82098e-05 | 9.38341e-05 |
| 1.00000e+06 | 3.86118e-11 | 2.59265e-08 | 3.31137e-06 | 3.29855e-05 | 8.69571e-05 |
| 100000.     | 6.39463e-11 | 8.36529e-09 | 5.39733e-07 | 5.94809e-06 | 2.59767e-05 |
| 10000.0     | 2.44878e-10 | 5.28599e-09 | 9.03038e-08 | 7.49233e-07 | 4.36443e-06 |
| 1000.00     | 4.52087e-10 | 3.39396e-09 | 2.26189e-08 | 1.25785e-07 | 6.91401e-07 |
| 100.000     | 5.11869e-10 | 3.00287e-09 | 1.53601e-08 | 6.63403e-08 | 2.55908e-07 |
| 10.0000     | 5.30419e-10 | 2.97809e-09 | 1.46480e-08 | 6.05254e-08 | 2.11452e-07 |
| 1.00000     | 5.34017e-10 | 2.97665e-09 | 1.45770e-08 | 5.99459e-08 | 2.07025e-07 |
| 0.100000    | 5.34405e-10 | 2.97651e-09 | 1.45699e-08 | 5.98880e-08 | 2.06583e-07 |
| 0.0100000   | 5.34444e-10 | 2.97650e-09 | 1.45692e-08 | 5.98822e-08 | 2.06539e-07 |
| 0.00100000  | 5.34448e-10 | 2.97649e-09 | 1.45691e-08 | 5.98816e-08 | 2.06535e-07 |
| 0.000100000 | 5.34449e-10 | 2.97649e-09 | 1.45691e-08 | 5.98815e-08 | 2.06535e-07 |
| 1.00000e-05 | 5.34449e-10 | 2.97649e-09 | 1.45691e-08 | 5.98815e-08 | 2.06535e-07 |
| 1.00000e-06 | 5.34449e-10 | 2.97649e-09 | 1.45691e-08 | 5.98815e-08 | 2.06535e-07 |
| 1.00000e-07 | 5.34449e-10 | 2.97649e-09 | 1.45691e-08 | 5.98815e-08 | 2.06535e-07 |
| 1.00000e-08 | 5.34449e-10 | 2.97649e-09 | 1.45691e-08 | 5.98815e-08 | 2.06535e-07 |
| 1.00000e-09 | 5.34449e-10 | 2.97649e-09 | 1.45691e-08 | 5.98815e-08 | 2.06535e-07 |

| Pa\K        | 900.000     | 1000.00     | 1100.00     | 1200.00     | 1300.00     |
|-------------|-------------|-------------|-------------|-------------|-------------|
| 1.00000e+08 | 9.93607e-06 | 6.01857e-06 | 4.60538e-06 | 3.76283e-06 | 2.94446e-06 |
| 1.00000e+07 | 7.16641e-05 | 5.22659e-05 | 4.41531e-05 | 4.02799e-05 | 3.74078e-05 |
| 1.00000e+06 | 0.000121010 | 0.000129981 | 0.000128952 | 0.000125055 | 0.000120002 |
| 100000.     | 6.82080e-05 | 0.000104228 | 0.000116680 | 0.000115102 | 0.000108070 |
| 10000.0     | 2.2533e-05  | 4.35291e-05 | 5.23859e-05 | 5.00755e-05 | 4.58778e-05 |
| 1000.00     | 3.93719e-06 | 9.97568e-06 | 1.28793e-05 | 1.42640e-05 | 1.75184e-05 |
| 100.000     | 9.66832e-07 | 2.46602e-06 | 4.45477e-06 | 7.66214e-06 | 1.30570e-05 |
| 10.0000     | 6.41258e-07 | 1.62801e-06 | 3.54382e-06 | 6.98395e-06 | 1.26210e-05 |
| 1.00000     | 6.09646e-07 | 1.54911e-06 | 3.45895e-06 | 6.92120e-06 | 1.25809e-05 |
| 0.100000    | 6.06532e-07 | 1.54155e-06 | 3.45092e-06 | 6.91529e-06 | 1.25772e-05 |
| 0.0100000   | 6.06223e-07 | 1.54081e-06 | 3.45014e-06 | 6.91473e-06 | 1.25768e-05 |
| 0.00100000  | 6.06192e-07 | 1.54074e-06 | 3.45007e-06 | 6.91467e-06 | 1.25768e-05 |
| 0.000100000 | 6.06189e-07 | 1.54073e-06 | 3.45006e-06 | 6.91466e-06 | 1.25768e-05 |
| 1.00000e-05 | 6.06189e-07 | 1.54073e-06 | 3.45006e-06 | 6.91466e-06 | 1.25768e-05 |
| 1.00000e-06 | 6.06189e-07 | 1.54073e-06 | 3.45006e-06 | 6.91466e-06 | 1.25768e-05 |
| 1.00000e-07 | 6.06189e-07 | 1.54073e-06 | 3.45006e-06 | 6.91466e-06 | 1.25768e-05 |
| 1.00000e-08 | 6.06189e-07 | 1.54073e-06 | 3.45006e-06 | 6.91466e-06 | 1.25768e-05 |
| 1.00000e-09 | 6.06189e-07 | 1.54073e-06 | 3.45006e-06 | 6.91466e-06 | 1.25768e-05 |

| Pa\K        | 1400.00     | 1500.00     | 1750.00     | 2000.00     | 2250.00     |
|-------------|-------------|-------------|-------------|-------------|-------------|
| 1.00000e+08 | 2.17806e-06 | 1.67451e-06 | 0.000538099 | 0.000540388 | 0.000528043 |
| 1.00000e+07 | 3.47506e-05 | 3.26932e-05 | 0.00105686  | 0.000993457 | 0.000874375 |
| 1.00000e+06 | 0.000114538 | 0.000109393 | 0.00102879  | 0.000826605 | 0.000633876 |
| 100000.     | 0.000100339 | 9.45599e-05 | 0.000523947 | 0.000378182 | 0.000320135 |
| 10000.0     | 4.47259e-05 | 4.82917e-05 | 0.000175444 | 0.000190117 | 0.000232116 |
| 1000.00     | 2.40893e-05 | 3.42286e-05 | 0.000100763 | 0.000160821 | 0.000220990 |
| 100.000     | 2.12790e-05 | 3.25399e-05 | 9.22189e-05 | 0.000157785 | 0.000219897 |
| 10.0000     | 2.10159e-05 | 3.23879e-05 | 9.13781e-05 | 0.000157491 | 0.000219792 |
| 1.00000     | 2.09920e-05 | 3.23743e-05 | 9.12963e-05 | 0.000157462 | 0.000219781 |

|             |             |             |             |             |             |
|-------------|-------------|-------------|-------------|-------------|-------------|
| 0.100000    | 2.09898e-05 | 3.23730e-05 | 9.12885e-05 | 0.000157460 | 0.000219781 |
| 0.0100000   | 2.09896e-05 | 3.23729e-05 | 9.12879e-05 | 0.000157460 | 0.000219781 |
| 0.00100000  | 2.09896e-05 | 3.23729e-05 | 9.12873e-05 | 0.000157459 | 0.000219781 |
| 0.000100000 | 2.09896e-05 | 3.23729e-05 | 9.12873e-05 | 0.000157459 | 0.000219781 |
| 1.00000e-05 | 2.09896e-05 | 3.23729e-05 | 9.12873e-05 | 0.000157459 | 0.000219781 |
| 1.00000e-06 | 2.09896e-05 | 3.23729e-05 | 9.12873e-05 | 0.000157459 | 0.000219781 |
| 1.00000e-07 | 2.09896e-05 | 3.23729e-05 | 9.12873e-05 | 0.000157459 | 0.000219781 |
| 1.00000e-08 | 2.09896e-05 | 3.23729e-05 | 9.12873e-05 | 0.000157459 | 0.000219781 |
| 1.00000e-09 | 2.09896e-05 | 3.23729e-05 | 9.12873e-05 | 0.000157459 | 0.000219781 |

rad45

=====

| Pa\K        | 20.0000     | 30.0000     | 40.0000     | 50.0000     | 60.0000     |
|-------------|-------------|-------------|-------------|-------------|-------------|
| 1.00000e+08 | 7.84370e-24 | 1.53368e-22 | 8.65050e-22 | 2.97518e-21 | 7.82718e-21 |
| 1.00000e+07 | 1.48671e-19 | 2.70183e-18 | 1.31984e-17 | 3.92968e-17 | 9.04729e-17 |
| 1.00000e+06 | 9.77826e-16 | 9.09479e-15 | 2.98620e-14 | 6.74773e-14 | 1.26022e-13 |
| 100000.     | 6.99877e-13 | 3.66816e-12 | 9.10598e-12 | 1.73231e-11 | 2.86747e-11 |
| 10000.0     | 1.17989e-10 | 4.12219e-10 | 7.29468e-10 | 1.04013e-09 | 1.34410e-09 |
| 1000.00     | 2.33230e-09 | 3.74584e-09 | 4.76407e-09 | 5.64662e-09 | 6.45714e-09 |
| 100.000     | 7.94158e-09 | 8.68465e-09 | 7.94443e-09 | 6.87883e-09 | 5.82585e-09 |
| 10.0000     | 1.83076e-09 | 3.33546e-10 | 1.36301e-10 | 8.80343e-11 | 6.83760e-11 |
| 1.00000     | 2.58536e-11 | 9.40558e-12 | 4.80716e-12 | 2.84626e-12 | 1.83020e-12 |
| 0.100000    | 2.55476e-13 | 2.03466e-14 | 3.39503e-15 | 8.20785e-16 | 2.50252e-16 |
| 0.0100000   | 2.68406e-18 | 1.65033e-20 | 7.64599e-22 | 8.46166e-23 | 1.52652e-23 |
| 0.00100000  | 4.33889e-26 | 1.44730e-28 | 6.19103e-30 | 7.17541e-31 | 1.41504e-31 |
| 0.000100000 | 6.40022e-34 | 4.55967e-36 | 3.21315e-37 | 5.38706e-38 | 1.42556e-38 |
| 1.00000e-05 | 1.67257e-40 | 3.10304e-42 | 3.79150e-43 | 9.53405e-44 | 3.54955e-44 |
| 1.00000e-06 | 1.41264e-45 | 1.32895e-46 | 4.62444e-47 | 2.49837e-47 | 1.71566e-47 |
| 1.00000e-07 | 2.60497e-48 | 6.38298e-49 | 3.16870e-49 | 2.14041e-49 | 1.71805e-49 |
| 1.00000e-08 | 3.76091e-50 | 1.34393e-50 | 8.55213e-51 | 6.45377e-51 | 6.81362e-51 |
| 1.00000e-09 | 1.73344e-51 | 6.35029e-52 | 6.16376e-52 | 7.34302e-52 | 2.87510e-52 |

| Pa\K        | 70.0000     | 80.0000     | 90.0000     | 100.000     | 110.000     |
|-------------|-------------|-------------|-------------|-------------|-------------|
| 1.00000e+08 | 1.74301e-20 | 3.46978e-20 | 6.38111e-20 | 1.10766e-19 | 1.84209e-19 |
| 1.00000e+07 | 1.78375e-16 | 3.17605e-16 | 5.26869e-16 | 8.30635e-16 | 1.26152e-15 |
| 1.00000e+06 | 2.09986e-13 | 3.24692e-13 | 4.76676e-13 | 6.74149e-13 | 9.27588e-13 |
| 100000.     | 4.35014e-11 | 6.21338e-11 | 8.49126e-11 | 1.12213e-10 | 1.44475e-10 |
| 10000.0     | 1.64507e-09 | 1.94703e-09 | 2.25378e-09 | 2.56902e-09 | 2.89654e-09 |
| 1000.00     | 7.21897e-09 | 7.94510e-09 | 8.64457e-09 | 9.32438e-09 | 9.99025e-09 |
| 100.000     | 4.88867e-09 | 4.08938e-09 | 3.42112e-09 | 2.86787e-09 | 2.41205e-09 |
| 10.0000     | 5.72271e-11 | 4.96773e-11 | 4.40708e-11 | 3.96827e-11 | 3.61295e-11 |
| 1.00000     | 1.24063e-12 | 8.72215e-13 | 6.29674e-13 | 4.63730e-13 | 3.46804e-13 |
| 0.100000    | 8.96524e-17 | 3.61861e-17 | 1.60138e-17 | 7.62569e-18 | 3.85510e-18 |
| 0.0100000   | 3.76647e-24 | 1.15505e-24 | 4.15506e-25 | 1.68868e-25 | 7.55662e-26 |
| 0.00100000  | 3.87939e-32 | 1.32983e-32 | 5.35571e-33 | 2.43604e-33 | 1.21871e-33 |
| 0.000100000 | 4.99787e-39 | 2.11973e-39 | 1.03171e-39 | 5.57717e-40 | 3.27865e-40 |
| 1.00000e-05 | 1.71037e-44 | 1.00348e-44 | 6.99942e-45 | 5.78090e-45 | 5.66714e-45 |
| 1.00000e-06 | 1.39362e-47 | 1.29921e-47 | 1.37316e-47 | 1.63762e-47 | 2.18519e-47 |
| 1.00000e-07 | 1.63542e-49 | 1.75043e-49 | 2.11025e-49 | 2.83381e-49 | 4.24562e-49 |
| 1.00000e-08 | 7.73663e-51 | 7.82697e-51 | 1.00070e-50 | 1.87099e-50 | 2.75616e-50 |
| 1.00000e-09 | 4.23741e-52 | 1.21389e-51 | 3.22779e-52 | 5.38789e-52 | 1.81939e-51 |

| Pa\K        | 120.000     | 130.000     | 140.000     | 150.000     | 160.000     |
|-------------|-------------|-------------|-------------|-------------|-------------|
| 1.00000e+08 | 2.96740e-19 | 4.66932e-19 | 7.22549e-19 | 1.10568e-18 | 1.68107e-18 |
| 1.00000e+07 | 1.86382e-15 | 2.69864e-15 | 3.85157e-15 | 5.44414e-15 | 7.65112e-15 |
| 1.00000e+06 | 1.25054e-12 | 1.66069e-12 | 2.18135e-12 | 2.84336e-12 | 3.68780e-12 |
| 100000.     | 1.82233e-10 | 2.26150e-10 | 2.77055e-10 | 3.35978e-10 | 4.04198e-10 |
| 10000.0     | 3.24042e-09 | 3.60515e-09 | 3.99579e-09 | 4.41812e-09 | 4.87882e-09 |
| 1000.00     | 1.06470e-08 | 1.12988e-08 | 1.19491e-08 | 1.26007e-08 | 1.32555e-08 |
| 100.000     | 2.03738e-09 | 1.72974e-09 | 1.47726e-09 | 1.27016e-09 | 1.10041e-09 |
| 10.0000     | 3.31804e-11 | 3.06846e-11 | 2.85375e-11 | 2.66632e-11 | 2.50050e-11 |
| 1.00000     | 2.62499e-13 | 2.00592e-13 | 1.54454e-13 | 1.19653e-13 | 9.31451e-14 |
| 0.100000    | 2.04828e-18 | 1.13495e-18 | 6.51855e-19 | 3.86181e-19 | 2.35054e-19 |
| 0.0100000   | 3.65537e-26 | 1.88563e-26 | 1.02667e-26 | 5.85306e-27 | 3.47215e-27 |
| 0.00100000  | 6.58328e-34 | 3.78900e-34 | 2.30102e-34 | 1.46397e-34 | 9.70852e-35 |
| 0.000100000 | 2.06902e-40 | 1.39313e-40 | 1.00347e-40 | 7.85955e-41 | 6.96315e-41 |
| 1.00000e-05 | 6.57098e-45 | 8.89330e-45 | 1.37481e-44 | 2.38338e-44 | 4.57447e-44 |
| 1.00000e-06 | 3.22548e-47 | 5.29069e-47 | 9.43607e-47 | 1.84946e-46 | 3.97426e-46 |
| 1.00000e-07 | 7.15645e-49 | 1.25111e-48 | 2.48548e-48 | 5.46233e-48 | 1.26799e-47 |
| 1.00000e-08 | 4.53235e-50 | 7.82277e-50 | 1.81064e-49 | 3.82944e-49 | 1.10555e-48 |
| 1.00000e-09 | 1.01198e-50 | 5.41956e-51 | 1.13189e-49 | 1.19862e-49 | 7.32325e-50 |

| Pa\K        | 170.000     | 180.000     | 190.000     | 200.000     | 210.000     |
|-------------|-------------|-------------|-------------|-------------|-------------|
| 1.00000e+08 | 2.54990e-18 | 3.87290e-18 | 5.91010e-18 | 9.09083e-18 | 1.41408e-17 |
| 1.00000e+07 | 1.07269e-14 | 1.50464e-14 | 2.11697e-14 | 2.99449e-14 | 4.26772e-14 |
| 1.00000e+06 | 4.76950e-12 | 6.16197e-12 | 7.96395e-12 | 1.03084e-11 | 1.33748e-11 |

|             |             |             |             |             |             |
|-------------|-------------|-------------|-------------|-------------|-------------|
| 100000.     | 4.83294e-10 | 5.75198e-10 | 6.82277e-10 | 8.07410e-10 | 9.54093e-10 |
| 10000.0     | 5.38555e-09 | 5.94719e-09 | 6.57399e-09 | 7.27781e-09 | 8.07236e-09 |
| 1000.00     | 1.39148e-08 | 1.45787e-08 | 1.52462e-08 | 1.59152e-08 | 1.65826e-08 |
| 100.000     | 9.61478e-10 | 8.48014e-10 | 7.55667e-10 | 6.80879e-10 | 6.20728e-10 |
| 10.0000     | 2.35193e-11 | 2.21719e-11 | 2.09355e-11 | 1.97882e-11 | 1.87125e-11 |
| 1.00000     | 7.27911e-14 | 5.70600e-14 | 4.48372e-14 | 3.52996e-14 | 2.78323e-14 |
| 0.100000    | 1.46507e-19 | 9.32568e-20 | 6.04839e-20 | 3.98941e-20 | 2.67171e-20 |
| 0.0100000   | 2.13265e-27 | 1.35094e-27 | 8.79850e-28 | 5.87781e-28 | 4.02105e-28 |
| 0.00100000  | 6.68913e-35 | 4.78162e-35 | 3.54994e-35 | 2.75120e-35 | 2.25663e-35 |
| 0.000100000 | 7.45408e-41 | 1.02898e-40 | 1.84784e-40 | 4.09999e-40 | 1.05868e-39 |
| 1.00000e-05 | 9.65770e-44 | 2.23713e-43 | 5.68829e-43 | 1.58502e-42 | 4.84061e-42 |
| 1.00000e-06 | 9.34179e-46 | 2.40570e-45 | 6.85912e-45 | 2.14897e-44 | 7.41897e-44 |
| 1.00000e-07 | 3.26315e-47 | 9.24294e-47 | 2.88234e-46 | 9.57527e-46 | 3.71097e-45 |
| 1.00000e-08 | 2.34483e-48 | 7.63506e-48 | 2.38247e-47 | 5.74889e-47 | 3.25313e-46 |
| 1.00000e-09 | 5.88715e-50 | 1.27023e-49 | 1.72803e-49 | 6.86486e-48 | 1.20673e-47 |

| Pa\K        | 220.000     | 230.000     | 240.000     | 250.000     | 260.000     |
|-------------|-------------|-------------|-------------|-------------|-------------|
| 1.00000e+08 | 2.23203e-17 | 3.58869e-17 | 5.90207e-17 | 9.97048e-17 | 1.73515e-16 |
| 1.00000e+07 | 6.14094e-14 | 8.94013e-14 | 1.31958e-13 | 1.97876e-13 | 3.01929e-13 |
| 1.00000e+06 | 1.74059e-11 | 2.27302e-11 | 2.97938e-11 | 3.92018e-11 | 5.17766e-11 |
| 100000.     | 1.12657e-09 | 1.32995e-09 | 1.57045e-09 | 1.85553e-09 | 2.19421e-09 |
| 10000.0     | 8.97348e-09 | 9.99937e-09 | 1.11710e-08 | 1.25124e-08 | 1.40508e-08 |
| 1000.00     | 1.72438e-08 | 1.78935e-08 | 1.85256e-08 | 1.91333e-08 | 1.97094e-08 |
| 100.000     | 5.72814e-10 | 5.35155e-10 | 5.06108e-10 | 4.84306e-10 | 4.68606e-10 |
| 10.0000     | 1.76942e-11 | 1.67224e-11 | 1.57884e-11 | 1.48861e-11 | 1.40114e-11 |
| 1.00000     | 2.19701e-14 | 1.73588e-14 | 1.37258e-14 | 1.08603e-14 | 8.59851e-15 |
| 0.100000    | 1.81427e-20 | 1.24786e-20 | 8.68545e-21 | 6.11333e-21 | 4.34913e-21 |
| 0.0100000   | 2.81432e-28 | 2.01494e-28 | 1.47704e-28 | 1.11120e-28 | 8.61957e-29 |
| 0.00100000  | 2.02713e-35 | 2.15475e-35 | 3.07280e-35 | 6.35521e-35 | 1.77827e-34 |
| 0.000100000 | 3.06117e-39 | 9.71237e-39 | 3.34387e-38 | 1.24006e-37 | 4.92265e-37 |
| 1.00000e-05 | 1.61577e-41 | 5.86974e-41 | 2.31466e-40 | 9.85437e-40 | 4.50799e-39 |
| 1.00000e-06 | 2.81069e-43 | 1.16182e-42 | 5.21824e-42 | 2.52756e-41 | 1.32775e-40 |
| 1.00000e-07 | 1.41900e-44 | 6.54744e-44 | 3.11541e-43 | 1.65957e-42 | 9.10792e-42 |
| 1.00000e-08 | 1.64022e-45 | 6.69072e-45 | 1.94783e-44 | 1.71795e-43 | 9.51842e-43 |
| 1.00000e-09 | 5.06987e-47 | 1.29374e-46 | 2.72660e-46 | 2.03084e-45 | 6.01778e-45 |

| Pa\K        | 270.000     | 280.000     | 290.000     | 300.000     | 310.000     |
|-------------|-------------|-------------|-------------|-------------|-------------|
| 1.00000e+08 | 3.10975e-16 | 5.70840e-16 | 1.06177e-15 | 2.51761e-15 | 3.60996e-15 |
| 1.00000e+07 | 4.68993e-13 | 7.40404e-13 | 1.18275e-12 | 8.47398e-12 | 3.03272e-12 |
| 1.00000e+06 | 6.86328e-11 | 9.12766e-11 | 1.21727e-10 | 7.72858e-10 | 2.17475e-10 |
| 100000.     | 2.59729e-09 | 3.07777e-09 | 3.65109e-09 | 8.89436e-09 | 5.15214e-09 |
| 10000.0     | 1.58174e-08 | 1.78471e-08 | 2.01789e-08 | 3.75738e-08 | 2.59208e-08 |
| 1000.00     | 2.02475e-08 | 2.07412e-08 | 2.11858e-08 | 2.27614e-08 | 2.19119e-08 |
| 100.000     | 4.58054e-10 | 4.51844e-10 | 4.49297e-10 | 5.34832e-10 | 4.52920e-10 |
| 10.0000     | 1.31616e-11 | 1.23359e-11 | 1.15346e-11 | 1.10304e-11 | 1.00087e-11 |
| 1.00000     | 6.81228e-15 | 5.40119e-15 | 4.28623e-15 | 6.58055e-15 | 2.70867e-15 |
| 0.100000    | 3.12628e-21 | 2.27045e-21 | 1.66612e-21 | 4.82037e-20 | 9.27450e-22 |
| 0.0100000   | 6.95766e-29 | 5.96012e-29 | 5.67832e-29 | 1.16993e-23 | 1.13542e-28 |
| 0.00100000  | 5.95801e-34 | 2.21308e-33 | 8.79568e-33 | 1.27128e-25 | 1.60235e-31 |
| 0.000100000 | 2.08068e-36 | 9.31410e-36 | 4.39260e-35 | 3.04785e-27 | 1.11884e-33 |
| 1.00000e-05 | 2.20792e-38 | 1.15022e-37 | 6.33934e-37 | 1.61497e-28 | 2.22697e-35 |
| 1.00000e-06 | 7.36447e-40 | 4.36056e-39 | 2.70876e-38 | 1.36162e-29 | 1.17861e-36 |
| 1.00000e-07 | 5.12279e-41 | 3.31845e-40 | 2.11239e-39 | 1.33547e-30 | 9.82490e-38 |
| 1.00000e-08 | 5.55309e-42 | 2.42248e-41 | 1.88472e-40 | 1.00959e-31 | 1.17278e-38 |
| 1.00000e-09 | 6.23755e-44 | 2.30561e-43 | 1.42042e-42 | 1.35226e-32 | 1.01152e-39 |

| Pa\K        | 400.000     | 500.000     | 600.000     | 700.000     | 800.000     |
|-------------|-------------|-------------|-------------|-------------|-------------|
| 1.00000e+08 | 1.15038e-07 | 2.94119e-05 | 0.000171310 | 0.000364542 | 0.000343712 |
| 1.00000e+07 | 4.67705e-08 | 7.25879e-06 | 0.000197255 | 0.000795013 | 0.00104535  |
| 1.00000e+06 | 2.34434e-08 | 1.06707e-06 | 2.30215e-05 | 0.000133218 | 0.000271191 |
| 100000.     | 6.50461e-08 | 6.44362e-07 | 4.82995e-06 | 1.32633e-05 | 2.31954e-05 |
| 10000.0     | 1.34574e-07 | 4.76783e-07 | 1.40486e-06 | 2.07680e-06 | 2.49613e-06 |
| 1000.00     | 3.09182e-08 | 8.05678e-08 | 2.21315e-07 | 2.85769e-07 | 2.89871e-07 |
| 100.000     | 8.92569e-10 | 3.69220e-09 | 1.51783e-08 | 2.33878e-08 | 2.57087e-08 |
| 10.0000     | 8.62926e-12 | 6.03550e-11 | 6.22457e-10 | 1.48261e-09 | 2.05863e-09 |
| 1.00000     | 5.31431e-15 | 1.38034e-12 | 3.40905e-11 | 1.07987e-10 | 1.76559e-10 |
| 0.100000    | 3.75683e-17 | 6.57401e-14 | 2.33909e-12 | 8.69836e-12 | 1.59037e-11 |
| 0.0100000   | 1.08318e-18 | 4.07693e-15 | 1.80622e-13 | 7.48030e-13 | 1.48096e-12 |
| 0.00100000  | 4.88378e-20 | 2.96312e-16 | 1.51125e-14 | 6.74453e-14 | 1.41201e-13 |
| 0.000100000 | 2.97194e-21 | 2.40844e-17 | 1.34323e-15 | 6.30551e-15 | 1.37003e-14 |
| 1.00000e-05 | 2.44646e-22 | 2.22432e-18 | 1.28312e-16 | 6.14498e-16 | 1.35466e-15 |
| 1.00000e-06 | 2.33625e-23 | 2.18380e-19 | 1.26942e-17 | 6.10742e-17 | 1.35096e-16 |
| 1.00000e-07 | 2.30531e-24 | 2.17166e-20 | 1.26811e-18 | 6.10333e-18 | 1.35135e-17 |
| 1.00000e-08 | 2.05149e-25 | 2.03760e-21 | 1.27391e-19 | 6.05058e-19 | 1.34939e-18 |
| 1.00000e-09 | 6.16992e-27 | 2.52796e-22 | 1.41982e-20 | 5.85758e-20 | 1.49527e-19 |

| Pa\K | 900.000 | 1000.00 | 1100.00 | 1200.00 | 1300.00 |
|------|---------|---------|---------|---------|---------|
|------|---------|---------|---------|---------|---------|

|             |             |             |             |             |             |
|-------------|-------------|-------------|-------------|-------------|-------------|
| 1.00000e+08 | 0.000179290 | 9.80175e-05 | 6.70600e-05 | 5.42992e-05 | 4.85612e-05 |
| 1.00000e+07 | 0.000805416 | 0.000586376 | 0.000483566 | 0.000432963 | 0.000403953 |
| 1.00000e+06 | 0.000341576 | 0.000348636 | 0.000326903 | 0.000300369 | 0.000275367 |
| 100000.     | 3.40774e-05 | 3.97799e-05 | 3.90890e-05 | 3.61362e-05 | 3.30474e-05 |
| 10000.0     | 3.05596e-06 | 3.38927e-06 | 3.37143e-06 | 3.24487e-06 | 3.09993e-06 |
| 1000.00     | 3.03123e-07 | 3.16335e-07 | 3.14979e-07 | 3.03984e-07 | 2.86711e-07 |
| 100.000     | 2.69815e-08 | 2.80687e-08 | 2.80105e-08 | 2.69880e-08 | 2.53218e-08 |
| 10.0000     | 2.36354e-09 | 2.53286e-09 | 2.55448e-09 | 2.47012e-09 | 2.32067e-09 |
| 1.00000     | 2.16254e-10 | 2.36778e-10 | 2.40625e-10 | 2.33435e-10 | 2.19785e-10 |
| 0.100000    | 2.03795e-11 | 2.26529e-11 | 2.31506e-11 | 2.25206e-11 | 2.12454e-11 |
| 0.0100000   | 1.95904e-12 | 2.20078e-12 | 2.25832e-12 | 2.20143e-12 | 2.07967e-12 |
| 0.00100000  | 1.90909e-13 | 2.16026e-13 | 2.22296e-13 | 2.16996e-13 | 2.05173e-13 |
| 0.000100000 | 1.87890e-14 | 2.13610e-14 | 2.20209e-14 | 2.15153e-14 | 2.03542e-14 |
| 1.00000e-05 | 1.86818e-15 | 2.12783e-15 | 2.19522e-15 | 2.14569e-15 | 2.03045e-15 |
| 1.00000e-06 | 1.86566e-16 | 2.12600e-16 | 2.19373e-16 | 2.14446e-16 | 2.02948e-16 |
| 1.00000e-07 | 1.86522e-17 | 2.12533e-17 | 2.19370e-17 | 2.14420e-17 | 2.02896e-17 |
| 1.00000e-08 | 1.86241e-18 | 2.12358e-18 | 2.19651e-18 | 2.14307e-18 | 2.02795e-18 |
| 1.00000e-09 | 1.92710e-19 | 2.18558e-19 | 2.22477e-19 | 2.15863e-19 | 2.02878e-19 |

| Pa\K        | 1400.00     | 1500.00     | 1750.00     | 2000.00     | 2250.00     |
|-------------|-------------|-------------|-------------|-------------|-------------|
| 1.00000e+08 | 4.56092e-05 | 4.37338e-05 | 6.91485e-05 | 6.27922e-05 | 5.66119e-05 |
| 1.00000e+07 | 0.000382146 | 0.000361350 | 2.25662e-05 | 1.93521e-05 | 1.65930e-05 |
| 1.00000e+06 | 0.000252672 | 0.000232089 | 5.85854e-06 | 5.81291e-06 | 5.64541e-06 |
| 100000.     | 3.04046e-05 | 2.82086e-05 | 2.27046e-06 | 2.11087e-06 | 1.67317e-06 |
| 10000.0     | 2.93463e-06 | 2.73685e-06 | 4.35669e-07 | 3.17998e-07 | 2.11761e-07 |
| 1000.00     | 2.64855e-07 | 2.40041e-07 | 4.65466e-08 | 3.19842e-08 | 2.06462e-08 |
| 100.000     | 2.32592e-08 | 2.09956e-08 | 4.52079e-09 | 3.09096e-09 | 1.99180e-09 |
| 10.0000     | 2.13440e-09 | 1.93064e-09 | 4.41316e-10 | 3.01889e-10 | 1.94643e-10 |
| 1.00000     | 2.02578e-10 | 1.83649e-10 | 4.34670e-11 | 2.97478e-11 | 1.91867e-11 |
| 0.100000    | 1.96156e-11 | 1.78089e-11 | 4.30496e-12 | 2.94688e-12 | 1.90102e-12 |
| 0.0100000   | 1.92221e-12 | 1.74661e-12 | 4.27809e-13 | 2.92884e-13 | 1.88958e-13 |
| 0.00100000  | 1.89754e-13 | 1.72494e-13 | 4.26114e-14 | 2.91755e-14 | 1.88246e-14 |
| 0.000100000 | 1.88317e-14 | 1.71236e-14 | 4.25581e-15 | 2.91415e-15 | 1.88040e-15 |
| 1.00000e-05 | 1.87894e-15 | 1.70877e-15 | 4.25490e-16 | 2.91356e-16 | 1.88006e-16 |
| 1.00000e-06 | 1.87812e-16 | 1.70815e-16 | 4.25463e-17 | 2.91346e-17 | 1.87987e-17 |
| 1.00000e-07 | 1.87819e-17 | 1.70762e-17 | 4.25499e-18 | 2.91428e-18 | 1.87932e-18 |
| 1.00000e-08 | 1.87478e-18 | 1.70624e-18 | 4.25459e-19 | 2.90686e-19 | 1.87990e-19 |
| 1.00000e-09 | 1.65265e-19 | 1.50346e-19 | 4.05982e-20 | 2.77957e-20 | 1.79330e-20 |

PAH7+H  
=====

| Pa\K        | 20.0000     | 30.0000     | 40.0000     | 50.0000     | 60.0000     |
|-------------|-------------|-------------|-------------|-------------|-------------|
| 1.00000e+08 | 4.20792e-32 | 9.20783e-31 | 5.59559e-30 | 2.05436e-29 | 5.76305e-29 |
| 1.00000e+07 | 1.01605e-27 | 2.04783e-26 | 1.10890e-25 | 3.66450e-25 | 9.37164e-25 |
| 1.00000e+06 | 1.18623e-23 | 1.67677e-22 | 7.48174e-22 | 2.17495e-21 | 5.06379e-21 |
| 100000.     | 4.97153e-20 | 5.71648e-19 | 2.25067e-18 | 5.88104e-18 | 1.23943e-17 |
| 10000.0     | 8.19403e-17 | 5.22764e-16 | 1.38164e-15 | 2.67813e-15 | 4.44619e-15 |
| 1000.00     | 1.41052e-14 | 4.43234e-14 | 8.08385e-14 | 1.22820e-13 | 1.70826e-13 |
| 100.000     | 3.43580e-13 | 8.65169e-13 | 1.64835e-12 | 2.83211e-12 | 4.56752e-12 |
| 10.0000     | 1.74516e-11 | 8.52605e-11 | 2.02997e-10 | 3.65663e-10 | 5.70139e-10 |
| 1.00000     | 1.48191e-09 | 3.57000e-09 | 5.44878e-09 | 7.16769e-09 | 8.77497e-09 |
| 0.100000    | 1.17078e-08 | 1.49228e-08 | 1.64047e-08 | 1.74642e-08 | 1.83908e-08 |
| 0.0100000   | 1.72839e-08 | 1.77778e-08 | 1.82784e-08 | 1.88638e-08 | 1.95169e-08 |
| 0.00100000  | 1.77837e-08 | 1.80222e-08 | 1.84439e-08 | 1.89908e-08 | 1.96212e-08 |
| 0.000100000 | 1.78319e-08 | 1.80463e-08 | 1.84602e-08 | 1.90034e-08 | 1.96315e-08 |
| 1.00000e-05 | 1.78367e-08 | 1.80487e-08 | 1.84619e-08 | 1.90047e-08 | 1.96326e-08 |
| 1.00000e-06 | 1.78372e-08 | 1.80489e-08 | 1.84620e-08 | 1.90048e-08 | 1.96327e-08 |
| 1.00000e-07 | 1.78373e-08 | 1.80489e-08 | 1.84621e-08 | 1.90048e-08 | 1.96327e-08 |
| 1.00000e-08 | 1.78373e-08 | 1.80489e-08 | 1.84621e-08 | 1.90048e-08 | 1.96327e-08 |
| 1.00000e-09 | 1.78373e-08 | 1.80489e-08 | 1.84621e-08 | 1.90048e-08 | 1.96327e-08 |

| Pa\K        | 70.0000     | 80.0000     | 90.0000     | 100.000     | 110.000     |
|-------------|-------------|-------------|-------------|-------------|-------------|
| 1.00000e+08 | 1.37122e-28 | 2.92688e-28 | 5.79785e-28 | 1.08992e-27 | 1.97550e-27 |
| 1.00000e+07 | 2.05486e-24 | 4.07662e-24 | 7.55532e-24 | 1.33559e-23 | 2.28510e-23 |
| 1.00000e+06 | 1.03156e-20 | 1.92593e-20 | 3.38717e-20 | 5.71246e-20 | 9.35426e-20 |
| 100000.     | 2.29337e-17 | 3.89598e-17 | 6.23884e-17 | 9.57822e-17 | 1.42630e-16 |
| 10000.0     | 6.74079e-15 | 9.64187e-15 | 1.32583e-14 | 1.77344e-14 | 2.32610e-14 |
| 1000.00     | 2.26004e-13 | 2.89986e-13 | 3.64932e-13 | 4.53678e-13 | 5.60003e-13 |
| 100.000     | 7.03688e-12 | 1.04707e-11 | 1.51666e-11 | 2.15147e-11 | 3.00336e-11 |
| 10.0000     | 8.15640e-10 | 1.10350e-09 | 1.43687e-09 | 1.82056e-09 | 2.26119e-09 |
| 1.00000     | 1.03077e-08 | 1.17959e-08 | 1.32644e-08 | 1.47345e-08 | 1.62260e-08 |
| 0.100000    | 1.92821e-08 | 2.01828e-08 | 2.11183e-08 | 2.21062e-08 | 2.31615e-08 |
| 0.0100000   | 2.02315e-08 | 2.10089e-08 | 2.18534e-08 | 2.27716e-08 | 2.37716e-08 |
| 0.00100000  | 2.03206e-08 | 2.10872e-08 | 2.19237e-08 | 2.28355e-08 | 2.38305e-08 |
| 0.000100000 | 2.03295e-08 | 2.10950e-08 | 2.19307e-08 | 2.28419e-08 | 2.38364e-08 |



|             |             |             |             |             |             |
|-------------|-------------|-------------|-------------|-------------|-------------|
| 1.00000e-05 | 2.03304e-08 | 2.10958e-08 | 2.19314e-08 | 2.28426e-08 | 2.38370e-08 |
| 1.00000e-06 | 2.03305e-08 | 2.10959e-08 | 2.19315e-08 | 2.28426e-08 | 2.38370e-08 |
| 1.00000e-07 | 2.03305e-08 | 2.10959e-08 | 2.19315e-08 | 2.28426e-08 | 2.38371e-08 |
| 1.00000e-08 | 2.03305e-08 | 2.10959e-08 | 2.19315e-08 | 2.28426e-08 | 2.38371e-08 |
| 1.00000e-09 | 2.03305e-08 | 2.10959e-08 | 2.19315e-08 | 2.28426e-08 | 2.38371e-08 |

| Pa\K        | 120.000     | 130.000     | 140.000     | 150.000     | 160.000     |
|-------------|-------------|-------------|-------------|-------------|-------------|
| 1.00000e+08 | 3.49404e-27 | 6.08841e-27 | 1.05356e-26 | 1.82285e-26 | 3.17236e-26 |
| 1.00000e+07 | 3.82567e-23 | 6.32192e-23 | 1.03858e-22 | 1.70655e-22 | 2.81956e-22 |
| 1.00000e+06 | 1.50114e-19 | 2.37790e-19 | 3.73984e-19 | 5.86749e-19 | 9.21852e-19 |
| 100000.     | 2.07752e-16 | 2.97900e-16 | 4.22624e-16 | 5.95555e-16 | 8.36276e-16 |
| 10000.0     | 3.00899e-14 | 3.85556e-14 | 4.91029e-14 | 6.23266e-14 | 7.90226e-14 |
| 1000.00     | 6.89031e-13 | 8.47821e-13 | 1.04625e-12 | 1.29835e-12 | 1.62432e-12 |
| 100.000     | 4.14201e-11 | 5.66187e-11 | 7.69154e-11 | 1.04066e-10 | 1.40462e-10 |
| 10.0000     | 2.76737e-09 | 3.35005e-09 | 4.02285e-09 | 4.80252e-09 | 5.70937e-09 |
| 1.00000     | 1.77581e-08 | 1.93506e-08 | 2.10242e-08 | 2.28012e-08 | 2.47058e-08 |
| 0.100000    | 2.42987e-08 | 2.55330e-08 | 2.68814e-08 | 2.83626e-08 | 2.99981e-08 |
| 0.0100000   | 2.48639e-08 | 2.60611e-08 | 2.73782e-08 | 2.88329e-08 | 3.04455e-08 |
| 0.00100000  | 2.49187e-08 | 2.61124e-08 | 2.74267e-08 | 2.88788e-08 | 3.04893e-08 |
| 0.000100000 | 2.49241e-08 | 2.61176e-08 | 2.74315e-08 | 2.88834e-08 | 3.04937e-08 |
| 1.00000e-05 | 2.49247e-08 | 2.61181e-08 | 2.74320e-08 | 2.88839e-08 | 3.04941e-08 |
| 1.00000e-06 | 2.49247e-08 | 2.61181e-08 | 2.74321e-08 | 2.88839e-08 | 3.04941e-08 |
| 1.00000e-07 | 2.49248e-08 | 2.61181e-08 | 2.74321e-08 | 2.88839e-08 | 3.04941e-08 |
| 1.00000e-08 | 2.49248e-08 | 2.61181e-08 | 2.74321e-08 | 2.88839e-08 | 3.04941e-08 |
| 1.00000e-09 | 2.49248e-08 | 2.61181e-08 | 2.74321e-08 | 2.88839e-08 | 3.04941e-08 |

| Pa\K        | 170.000     | 180.000     | 190.000     | 200.000     | 210.000     |
|-------------|-------------|-------------|-------------|-------------|-------------|
| 1.00000e+08 | 5.58309e-26 | 9.98547e-26 | 1.82354e-25 | 3.41671e-25 | 6.60269e-25 |
| 1.00000e+07 | 4.70589e-22 | 7.96694e-22 | 1.37331e-21 | 2.41897e-21 | 4.36946e-21 |
| 1.00000e+06 | 1.45479e-18 | 2.31141e-18 | 3.70333e-18 | 5.98943e-18 | 9.78263e-18 |
| 100000.     | 1.17305e-15 | 1.64690e-15 | 2.31740e-15 | 3.27150e-15 | 4.63609e-15 |
| 10000.0     | 1.00260e-13 | 1.27480e-13 | 1.62632e-13 | 2.08358e-13 | 2.68267e-13 |
| 1000.00     | 2.05373e-12 | 2.63036e-12 | 3.41986e-12 | 4.52178e-12 | 6.08829e-12 |
| 100.000     | 1.89365e-10 | 2.55187e-10 | 3.43877e-10 | 4.63410e-10 | 6.24387e-10 |
| 10.0000     | 6.76776e-09 | 8.00659e-09 | 9.45978e-09 | 1.11667e-08 | 1.31729e-08 |
| 1.00000     | 2.67648e-08 | 2.90074e-08 | 3.14663e-08 | 3.41773e-08 | 3.71808e-08 |
| 0.100000    | 3.18118e-08 | 3.38307e-08 | 3.60853e-08 | 3.86097e-08 | 4.14425e-08 |
| 0.0100000   | 3.22393e-08 | 3.42407e-08 | 3.64798e-08 | 3.89907e-08 | 4.18113e-08 |
| 0.00100000  | 3.22812e-08 | 3.42810e-08 | 3.65187e-08 | 3.90282e-08 | 4.18476e-08 |
| 0.000100000 | 3.22854e-08 | 3.42851e-08 | 3.65225e-08 | 3.90319e-08 | 4.18513e-08 |
| 1.00000e-05 | 3.22858e-08 | 3.42855e-08 | 3.65229e-08 | 3.90323e-08 | 4.18516e-08 |
| 1.00000e-06 | 3.22859e-08 | 3.42855e-08 | 3.65230e-08 | 3.90324e-08 | 4.18517e-08 |
| 1.00000e-07 | 3.22859e-08 | 3.42855e-08 | 3.65230e-08 | 3.90324e-08 | 4.18517e-08 |
| 1.00000e-08 | 3.22859e-08 | 3.42855e-08 | 3.65230e-08 | 3.90324e-08 | 4.18517e-08 |
| 1.00000e-09 | 3.22859e-08 | 3.42855e-08 | 3.65230e-08 | 3.90324e-08 | 4.18517e-08 |

| Pa\K        | 220.000     | 230.000     | 240.000     | 250.000     | 260.000     |
|-------------|-------------|-------------|-------------|-------------|-------------|
| 1.00000e+08 | 1.32367e-24 | 2.76879e-24 | 6.06545e-24 | 1.38892e-23 | 3.29050e-23 |
| 1.00000e+07 | 8.12381e-21 | 1.56017e-20 | 3.10258e-20 | 6.38534e-20 | 1.35240e-19 |
| 1.00000e+06 | 1.61364e-17 | 2.68710e-17 | 4.51438e-17 | 7.64403e-17 | 1.30273e-16 |
| 100000.     | 6.59668e-15 | 9.42454e-15 | 1.35161e-14 | 1.94503e-14 | 2.80700e-14 |
| 10000.0     | 3.47299e-13 | 4.52262e-13 | 5.92601e-13 | 7.81503e-13 | 1.03750e-12 |
| 1000.00     | 8.35336e-12 | 1.16780e-11 | 1.66189e-11 | 2.40324e-11 | 3.52267e-11 |
| 100.000     | 8.40815e-10 | 1.13105e-09 | 1.51891e-09 | 2.03513e-09 | 2.71890e-09 |
| 10.0000     | 1.55297e-08 | 1.82958e-08 | 2.15366e-08 | 2.53249e-08 | 2.97408e-08 |
| 1.00000     | 4.05213e-08 | 4.42489e-08 | 4.84192e-08 | 5.30941e-08 | 5.83434e-08 |
| 0.100000    | 4.46268e-08 | 4.82112e-08 | 5.22501e-08 | 5.68044e-08 | 6.19427e-08 |
| 0.0100000   | 4.49846e-08 | 4.85591e-08 | 5.25890e-08 | 5.71353e-08 | 6.22660e-08 |
| 0.00100000  | 4.50199e-08 | 4.85935e-08 | 5.26226e-08 | 5.71680e-08 | 6.22980e-08 |
| 0.000100000 | 4.50235e-08 | 4.85969e-08 | 5.26259e-08 | 5.71713e-08 | 6.23012e-08 |
| 1.00000e-05 | 4.50238e-08 | 4.85973e-08 | 5.26263e-08 | 5.71716e-08 | 6.23016e-08 |
| 1.00000e-06 | 4.50238e-08 | 4.85973e-08 | 5.26263e-08 | 5.71717e-08 | 6.23016e-08 |
| 1.00000e-07 | 4.50239e-08 | 4.85973e-08 | 5.26263e-08 | 5.71717e-08 | 6.23016e-08 |
| 1.00000e-08 | 4.50239e-08 | 4.85973e-08 | 5.26263e-08 | 5.71717e-08 | 6.23016e-08 |
| 1.00000e-09 | 4.50239e-08 | 4.85973e-08 | 5.26263e-08 | 5.71717e-08 | 6.23016e-08 |

| Pa\K        | 270.000     | 280.000     | 290.000     | 300.000     | 310.000     |
|-------------|-------------|-------------|-------------|-------------|-------------|
| 1.00000e+08 | 7.92047e-23 | 1.89568e-22 | 4.42139e-22 | 5.13995e-16 | 2.10169e-21 |
| 1.00000e+07 | 2.91410e-19 | 6.28894e-19 | 1.33693e-18 | 9.82886e-15 | 5.46724e-18 |
| 1.00000e+06 | 2.23028e-16 | 3.82543e-16 | 6.55120e-16 | 4.33740e-14 | 1.87978e-15 |
| 100000.     | 4.05971e-14 | 5.87923e-14 | 8.51673e-14 | 8.38647e-13 | 1.77952e-13 |
| 10000.0     | 1.38681e-12 | 1.86658e-12 | 2.52961e-12 | 2.11018e-11 | 4.73296e-12 |
| 1000.00     | 5.21802e-11 | 7.78442e-11 | 1.16546e-10 | 9.44373e-10 | 2.60371e-10 |
| 100.000     | 3.61968e-09 | 4.79926e-09 | 6.33377e-09 | 1.64036e-08 | 1.08534e-08 |
| 10.0000     | 3.48730e-08 | 4.08174e-08 | 4.76788e-08 | 7.00774e-08 | 6.46008e-08 |
| 1.00000     | 6.42442e-08 | 7.08827e-08 | 7.83540e-08 | 9.74914e-08 | 9.62100e-08 |

|             |             |             |             |             |             |
|-------------|-------------|-------------|-------------|-------------|-------------|
| 0.100000    | 6.77411e-08 | 7.42849e-08 | 8.16685e-08 | 1.00369e-07 | 9.93662e-08 |
| 0.0100000   | 6.80575e-08 | 7.45948e-08 | 8.19725e-08 | 1.00637e-07 | 9.96594e-08 |
| 0.00100000  | 6.80889e-08 | 7.46256e-08 | 8.20027e-08 | 1.00664e-07 | 9.96885e-08 |
| 0.000100000 | 6.80920e-08 | 7.46287e-08 | 8.20057e-08 | 1.00666e-07 | 9.96914e-08 |
| 1.00000e-05 | 6.80923e-08 | 7.46290e-08 | 8.20060e-08 | 1.00667e-07 | 9.96917e-08 |
| 1.00000e-06 | 6.80924e-08 | 7.46290e-08 | 8.20060e-08 | 1.00667e-07 | 9.96917e-08 |
| 1.00000e-07 | 6.80924e-08 | 7.46290e-08 | 8.20060e-08 | 1.00667e-07 | 9.96917e-08 |
| 1.00000e-08 | 6.80924e-08 | 7.46290e-08 | 8.20060e-08 | 1.00667e-07 | 9.96917e-08 |
| 1.00000e-09 | 6.80924e-08 | 7.46290e-08 | 8.20060e-08 | 1.00667e-07 | 9.96917e-08 |

| Pa\K        | 400.000     | 500.000     | 600.000     | 700.000     | 800.000     |
|-------------|-------------|-------------|-------------|-------------|-------------|
| 1.00000e+08 | 8.03113e-10 | 5.55077e-07 | 4.12680e-06 | 9.91980e-06 | 9.47017e-06 |
| 1.00000e+07 | 1.46024e-10 | 2.94966e-07 | 1.68291e-05 | 7.69888e-05 | 0.000104861 |
| 1.00000e+06 | 2.97209e-11 | 6.03456e-08 | 7.79286e-06 | 6.48800e-05 | 0.000143617 |
| 100000.     | 1.04086e-10 | 5.05201e-08 | 3.18002e-06 | 2.85103e-05 | 8.35539e-05 |
| 10000.0     | 1.84603e-09 | 1.02818e-07 | 1.78636e-06 | 1.09430e-05 | 3.45364e-05 |
| 1000.00     | 2.34117e-08 | 2.77787e-07 | 1.63754e-06 | 5.74162e-06 | 1.47069e-05 |
| 100.000     | 1.32542e-07 | 6.51623e-07 | 2.12259e-06 | 5.28635e-06 | 1.10378e-05 |
| 10.0000     | 2.60513e-07 | 8.28918e-07 | 2.25459e-06 | 5.25609e-06 | 1.06265e-05 |
| 1.00000     | 2.87159e-07 | 8.49545e-07 | 2.26592e-06 | 5.25112e-06 | 1.05847e-05 |
| 0.100000    | 2.89506e-07 | 8.51365e-07 | 2.26695e-06 | 5.25059e-06 | 1.05805e-05 |
| 0.0100000   | 2.89732e-07 | 8.51544e-07 | 2.26705e-06 | 5.25053e-06 | 1.05801e-05 |
| 0.00100000  | 2.89755e-07 | 8.51562e-07 | 2.26706e-06 | 5.25052e-06 | 1.05800e-05 |
| 0.000100000 | 2.89757e-07 | 8.51564e-07 | 2.26706e-06 | 5.25052e-06 | 1.05800e-05 |
| 1.00000e-05 | 2.89758e-07 | 8.51564e-07 | 2.26706e-06 | 5.25052e-06 | 1.05800e-05 |
| 1.00000e-06 | 2.89758e-07 | 8.51564e-07 | 2.26706e-06 | 5.25052e-06 | 1.05800e-05 |
| 1.00000e-07 | 2.89758e-07 | 8.51564e-07 | 2.26706e-06 | 5.25052e-06 | 1.05800e-05 |
| 1.00000e-08 | 2.89758e-07 | 8.51564e-07 | 2.26706e-06 | 5.25052e-06 | 1.05800e-05 |
| 1.00000e-09 | 2.89758e-07 | 8.51564e-07 | 2.26706e-06 | 5.25052e-06 | 1.05800e-05 |

| Pa\K        | 900.000     | 1000.00     | 1100.00     | 1200.00     | 1300.00     |
|-------------|-------------|-------------|-------------|-------------|-------------|
| 1.00000e+08 | 4.87157e-06 | 2.80989e-06 | 2.10714e-06 | 1.77798e-06 | 1.56069e-06 |
| 1.00000e+07 | 7.95849e-05 | 5.72085e-05 | 4.77567e-05 | 4.36693e-05 | 4.15128e-05 |
| 1.00000e+06 | 0.000183869 | 0.000190564 | 0.000185170 | 0.000178019 | 0.000171181 |
| 100000.     | 0.000150178 | 0.000193929 | 0.000205037 | 0.000200723 | 0.000191885 |
| 10000.0     | 7.51007e-05 | 0.000112965 | 0.000125823 | 0.000125521 | 0.000124475 |
| 1000.00     | 3.05998e-05 | 4.86561e-05 | 6.12764e-05 | 7.25540e-05 | 8.59592e-05 |
| 100.000     | 2.01480e-05 | 3.22437e-05 | 4.62215e-05 | 6.20876e-05 | 7.95932e-05 |
| 10.0000     | 1.89630e-05 | 3.03958e-05 | 4.45960e-05 | 6.10275e-05 | 7.89921e-05 |
| 1.00000     | 1.88498e-05 | 3.02253e-05 | 4.44480e-05 | 6.09325e-05 | 7.89400e-05 |
| 0.100000    | 1.88388e-05 | 3.02092e-05 | 4.44343e-05 | 6.09237e-05 | 7.89348e-05 |
| 0.0100000   | 1.88377e-05 | 3.02076e-05 | 4.44330e-05 | 6.09229e-05 | 7.89341e-05 |
| 0.00100000  | 1.88376e-05 | 3.02076e-05 | 4.44328e-05 | 6.09229e-05 | 7.89341e-05 |
| 0.000100000 | 1.88376e-05 | 3.02075e-05 | 4.44328e-05 | 6.09229e-05 | 7.89341e-05 |
| 1.00000e-05 | 1.88376e-05 | 3.02075e-05 | 4.44328e-05 | 6.09229e-05 | 7.89341e-05 |
| 1.00000e-06 | 1.88376e-05 | 3.02075e-05 | 4.44328e-05 | 6.09229e-05 | 7.89341e-05 |
| 1.00000e-07 | 1.88376e-05 | 3.02075e-05 | 4.44328e-05 | 6.09229e-05 | 7.89341e-05 |
| 1.00000e-08 | 1.88376e-05 | 3.02075e-05 | 4.44328e-05 | 6.09229e-05 | 7.89341e-05 |
| 1.00000e-09 | 1.88376e-05 | 3.02075e-05 | 4.44328e-05 | 6.09229e-05 | 7.89341e-05 |

| Pa\K        | 1400.00     | 1500.00     | 1750.00     | 2000.00     | 2250.00     |
|-------------|-------------|-------------|-------------|-------------|-------------|
| 1.00000e+08 | 1.32466e-06 | 1.03762e-06 | 0.000424294 | 0.000418142 | 0.000404627 |
| 1.00000e+07 | 3.94917e-05 | 3.66031e-05 | 0.000812661 | 0.000738726 | 0.000644566 |
| 1.00000e+06 | 0.000164586 | 0.000157902 | 0.000814096 | 0.000649471 | 0.000508481 |
| 100000.     | 0.000183233 | 0.000176772 | 0.000470877 | 0.000350590 | 0.000293680 |
| 10000.0     | 0.000127248 | 0.000134243 | 0.000212323 | 0.000210873 | 0.000225040 |
| 1000.00     | 0.000101624 | 0.000118541 | 0.000155510 | 0.000188643 | 0.000216212 |
| 100.000     | 9.80601e-05 | 0.000116702 | 0.000149025 | 0.000186359 | 0.000215355 |
| 10.0000     | 9.77489e-05 | 0.000116558 | 0.000148391 | 0.000186139 | 0.000215274 |
| 1.00000     | 9.77230e-05 | 0.000116546 | 0.000148329 | 0.000186118 | 0.000215266 |
| 0.100000    | 9.77202e-05 | 0.000116546 | 0.000148323 | 0.000186116 | 0.000215265 |
| 0.0100000   | 9.77202e-05 | 0.000116546 | 0.000148323 | 0.000186116 | 0.000215265 |
| 0.00100000  | 9.77202e-05 | 0.000116546 | 0.000148323 | 0.000186116 | 0.000215265 |
| 0.000100000 | 9.77202e-05 | 0.000116546 | 0.000148323 | 0.000186116 | 0.000215265 |
| 1.00000e-05 | 9.77202e-05 | 0.000116546 | 0.000148323 | 0.000186116 | 0.000215265 |
| 1.00000e-06 | 9.77202e-05 | 0.000116546 | 0.000148323 | 0.000186116 | 0.000215265 |
| 1.00000e-07 | 9.77202e-05 | 0.000116546 | 0.000148323 | 0.000186116 | 0.000215265 |
| 1.00000e-08 | 9.77202e-05 | 0.000116546 | 0.000148323 | 0.000186116 | 0.000215265 |
| 1.00000e-09 | 9.77202e-05 | 0.000116546 | 0.000148323 | 0.000186116 | 0.000215265 |

rad11

====

| Pa\K        | 20.0000     | 30.0000     | 40.0000     | 50.0000     | 60.0000     |
|-------------|-------------|-------------|-------------|-------------|-------------|
| 1.00000e+08 | 5.72257e-17 | 4.13871e-16 | 1.23392e-15 | 2.62790e-15 | 4.69666e-15 |
| 1.00000e+07 | 2.49403e-14 | 1.25149e-13 | 3.02676e-13 | 5.60434e-13 | 9.04378e-13 |
| 1.00000e+06 | 3.56807e-12 | 1.44004e-11 | 3.14329e-11 | 5.43277e-11 | 8.30518e-11 |

|             |             |             |             |             |             |
|-------------|-------------|-------------|-------------|-------------|-------------|
| 100000.     | 2.68209e-10 | 8.27930e-10 | 1.48941e-09 | 2.20751e-09 | 2.96871e-09 |
| 10000.0     | 6.10263e-09 | 1.16932e-08 | 1.58646e-08 | 1.90493e-08 | 2.15034e-08 |
| 1000.00     | 2.22624e-08 | 1.63291e-08 | 1.12372e-08 | 8.05853e-09 | 6.06506e-09 |
| 100.000     | 1.88109e-09 | 7.97247e-10 | 6.70956e-10 | 6.84758e-10 | 7.34694e-10 |
| 10.0000     | 8.40789e-10 | 9.65912e-10 | 9.82882e-10 | 9.73065e-10 | 9.56224e-10 |
| 1.00000     | 7.18969e-10 | 5.07787e-10 | 3.86764e-10 | 3.05365e-10 | 2.46061e-10 |
| 0.100000    | 8.50299e-11 | 1.74611e-11 | 5.19406e-12 | 1.91261e-12 | 8.12753e-13 |
| 0.0100000   | 3.39304e-14 | 8.88053e-16 | 1.00249e-16 | 2.11568e-17 | 6.32273e-18 |
| 0.00100000  | 1.36002e-19 | 3.26444e-21 | 4.21775e-22 | 1.03441e-22 | 3.55895e-23 |
| 0.000100000 | 1.32214e-24 | 5.80191e-26 | 1.06072e-26 | 3.31606e-27 | 1.37563e-27 |
| 1.00000e-05 | 9.17352e-29 | 6.95927e-30 | 1.70712e-30 | 6.52014e-31 | 3.14950e-31 |
| 1.00000e-06 | 3.35688e-32 | 3.93349e-33 | 1.21864e-33 | 5.45834e-34 | 2.97658e-34 |
| 1.00000e-07 | 4.63414e-35 | 7.74654e-36 | 2.91196e-36 | 1.49006e-36 | 8.99941e-37 |
| 1.00000e-08 | 1.94623e-37 | 4.47845e-38 | 2.01858e-38 | 1.17544e-38 | 7.86159e-39 |
| 1.00000e-09 | 2.37293e-39 | 7.66789e-40 | 4.19802e-40 | 2.80628e-40 | 2.09166e-40 |

| Pa\K        | 70.0000     | 80.0000     | 90.0000     | 100.000     | 110.000     |
|-------------|-------------|-------------|-------------|-------------|-------------|
| 1.00000e+08 | 7.54997e-15 | 1.13189e-14 | 1.61661e-14 | 2.22963e-14 | 2.99718e-14 |
| 1.00000e+07 | 1.34348e-12 | 1.89011e-12 | 2.56047e-12 | 3.37548e-12 | 4.36199e-12 |
| 1.00000e+06 | 1.17798e-10 | 1.58962e-10 | 2.07135e-10 | 2.63110e-10 | 3.27915e-10 |
| 100000.     | 3.77046e-09 | 4.61514e-09 | 5.50762e-09 | 6.45441e-09 | 7.46343e-09 |
| 10000.0     | 2.33993e-08 | 2.48603e-08 | 2.59765e-08 | 2.68152e-08 | 2.74280e-08 |
| 1000.00     | 4.76204e-09 | 3.87338e-09 | 3.24487e-09 | 2.78719e-09 | 2.44649e-09 |
| 100.000     | 7.96078e-10 | 8.61295e-10 | 9.27724e-10 | 9.94508e-10 | 1.06149e-09 |
| 10.0000     | 9.28209e-10 | 9.20886e-10 | 9.04772e-10 | 8.89895e-10 | 8.76107e-10 |
| 1.00000     | 2.00843e-10 | 1.65351e-10 | 1.36936e-10 | 1.13863e-10 | 9.49340e-11 |
| 0.100000    | 3.83169e-13 | 1.95473e-13 | 1.06098e-13 | 6.05401e-14 | 3.59955e-14 |
| 0.0100000   | 2.35682e-18 | 1.02292e-18 | 4.95990e-19 | 2.61587e-19 | 1.47349e-19 |
| 0.00100000  | 1.50886e-23 | 7.36651e-24 | 3.98034e-24 | 2.32115e-24 | 1.43642e-24 |
| 0.000100000 | 6.79561e-28 | 3.77815e-28 | 2.28722e-28 | 1.47664e-28 | 1.00268e-28 |
| 1.00000e-05 | 1.76005e-31 | 1.08606e-31 | 7.20091e-32 | 5.04315e-32 | 3.68941e-32 |
| 1.00000e-06 | 1.83543e-34 | 1.23100e-34 | 8.77873e-35 | 6.56380e-35 | 5.10006e-35 |
| 1.00000e-07 | 6.03186e-37 | 4.34323e-37 | 3.29662e-37 | 2.60720e-37 | 2.13321e-37 |
| 1.00000e-08 | 5.73912e-39 | 4.45108e-39 | 3.60960e-39 | 3.03052e-39 | 2.61731e-39 |
| 1.00000e-09 | 1.67109e-40 | 1.40105e-40 | 1.21731e-40 | 1.08727e-40 | 9.93043e-41 |

| Pa\K        | 120.000     | 130.000     | 140.000     | 150.000     | 160.000     |
|-------------|-------------|-------------|-------------|-------------|-------------|
| 1.00000e+08 | 3.95316e-14 | 5.14184e-14 | 6.62159e-14 | 8.47008e-14 | 1.07914e-13 |
| 1.00000e+07 | 5.55457e-12 | 6.99800e-12 | 8.75054e-12 | 1.08885e-11 | 1.35122e-11 |
| 1.00000e+06 | 4.02860e-10 | 4.89596e-10 | 5.90198e-10 | 7.07262e-10 | 8.44022e-10 |
| 100000.     | 8.54414e-09 | 9.70762e-09 | 1.09668e-08 | 1.23367e-08 | 1.38343e-08 |
| 10000.0     | 2.78550e-08 | 2.81278e-08 | 2.82721e-08 | 2.83080e-08 | 2.82523e-08 |
| 1000.00     | 2.18901e-09 | 1.99289e-09 | 1.84360e-09 | 1.73128e-09 | 1.64919e-09 |
| 100.000     | 1.12885e-09 | 1.19688e-09 | 1.26600e-09 | 1.33662e-09 | 1.40918e-09 |
| 10.0000     | 8.63201e-10 | 8.50949e-10 | 8.39122e-10 | 8.27488e-10 | 8.15812e-10 |
| 1.00000     | 7.92863e-11 | 6.62781e-11 | 5.54197e-11 | 4.63296e-11 | 3.87049e-11 |
| 0.100000    | 2.21512e-14 | 1.40346e-14 | 9.11641e-15 | 6.05041e-15 | 4.09121e-15 |
| 0.0100000   | 8.75040e-20 | 5.42620e-20 | 3.48816e-20 | 2.31142e-20 | 1.57186e-20 |
| 0.00100000  | 9.32239e-25 | 6.29105e-25 | 4.38659e-25 | 3.14559e-25 | 2.31190e-25 |
| 0.000100000 | 7.09334e-29 | 5.19360e-29 | 3.91818e-29 | 3.03771e-29 | 2.41811e-29 |
| 1.00000e-05 | 2.79881e-32 | 2.19168e-32 | 1.76774e-32 | 1.46890e-32 | 1.26134e-32 |
| 1.00000e-06 | 4.09604e-35 | 3.39178e-35 | 2.89657e-35 | 2.56016e-35 | 2.35998e-35 |
| 1.00000e-07 | 1.79855e-37 | 1.56068e-37 | 1.39618e-37 | 1.29446e-37 | 1.25626e-37 |
| 1.00000e-08 | 2.31585e-39 | 2.09464e-39 | 1.93549e-39 | 1.82901e-39 | 1.77596e-39 |
| 1.00000e-09 | 9.23916e-41 | 8.73565e-41 | 8.37526e-41 | 8.13441e-41 | 8.00171e-41 |

| Pa\K        | 170.000     | 180.000     | 190.000     | 200.000     | 210.000     |
|-------------|-------------|-------------|-------------|-------------|-------------|
| 1.00000e+08 | 1.37269e-13 | 1.74695e-13 | 2.22865e-13 | 2.85531e-13 | 3.68039e-13 |
| 1.00000e+07 | 1.67550e-11 | 2.07945e-11 | 2.58700e-11 | 3.23066e-11 | 4.05510e-11 |
| 1.00000e+06 | 1.00450e-09 | 1.19367e-09 | 1.41772e-09 | 1.68430e-09 | 2.00288e-09 |
| 100000.     | 1.54791e-08 | 1.72927e-08 | 1.92992e-08 | 2.15249e-08 | 2.39985e-08 |
| 10000.0     | 2.81184e-08 | 2.79175e-08 | 2.76589e-08 | 2.73507e-08 | 2.69999e-08 |
| 1000.00     | 1.59272e-09 | 1.55878e-09 | 1.54538e-09 | 1.55141e-09 | 1.57640e-09 |
| 100.000     | 1.48414e-09 | 1.56189e-09 | 1.64283e-09 | 1.72732e-09 | 1.81562e-09 |
| 10.0000     | 8.03857e-10 | 7.91387e-10 | 7.78163e-10 | 7.63961e-10 | 7.48566e-10 |
| 1.00000     | 3.23024e-11 | 2.69239e-11 | 2.24064e-11 | 1.86148e-11 | 1.54357e-11 |
| 0.100000    | 2.81188e-15 | 1.96046e-15 | 1.38420e-15 | 9.88311e-16 | 7.12703e-16 |
| 0.0100000   | 1.09311e-20 | 7.75146e-21 | 5.59236e-21 | 4.09759e-21 | 3.04523e-21 |
| 0.00100000  | 1.73750e-25 | 1.33367e-25 | 1.04555e-25 | 8.38481e-26 | 6.90374e-26 |
| 0.000100000 | 1.97863e-29 | 1.67036e-29 | 1.46498e-29 | 1.34953e-29 | 1.32535e-29 |
| 1.00000e-05 | 1.12682e-32 | 1.05895e-32 | 1.06342e-32 | 1.16239e-32 | 1.40669e-32 |
| 1.00000e-06 | 2.29772e-35 | 2.40466e-35 | 2.75976e-35 | 3.53457e-35 | 5.10395e-35 |
| 1.00000e-07 | 1.29579e-37 | 1.45047e-37 | 1.80114e-37 | 2.53036e-37 | 4.07875e-37 |
| 1.00000e-08 | 1.78585e-39 | 1.89211e-39 | 2.17789e-39 | 2.86993e-39 | 4.70174e-39 |
| 1.00000e-09 | 7.98486e-41 | 8.13664e-41 | 8.65440e-41 | 1.02631e-40 | 1.57408e-40 |

| Pa\K | 220.000 | 230.000 | 240.000 | 250.000 | 260.000 |
|------|---------|---------|---------|---------|---------|
|------|---------|---------|---------|---------|---------|

|             |             |             |             |             |             |
|-------------|-------------|-------------|-------------|-------------|-------------|
| 1.00000e+08 | 4.78151e-13 | 6.27365e-13 | 8.33133e-13 | 1.12257e-12 | 1.53874e-12 |
| 1.00000e+07 | 5.12241e-11 | 6.52008e-11 | 8.37327e-11 | 1.08635e-10 | 1.42570e-10 |
| 1.00000e+06 | 2.38516e-09 | 2.84567e-09 | 3.40238e-09 | 4.07756e-09 | 4.89889e-09 |
| 100000.     | 2.67505e-08 | 2.98131e-08 | 3.32199e-08 | 3.70048e-08 | 4.12018e-08 |
| 10000.0     | 2.66125e-08 | 2.61946e-08 | 2.57517e-08 | 2.52891e-08 | 2.48122e-08 |
| 1000.00     | 1.62047e-09 | 1.68416e-09 | 1.76844e-09 | 1.87463e-09 | 2.00437e-09 |
| 100.000     | 1.90798e-09 | 2.00454e-09 | 2.10535e-09 | 2.21036e-09 | 2.31936e-09 |
| 10.0000     | 7.31793e-10 | 7.13486e-10 | 6.93535e-10 | 6.71875e-10 | 6.48500e-10 |
| 1.00000     | 1.27742e-11 | 1.05498e-11 | 8.69449e-12 | 7.15025e-12 | 5.86788e-12 |
| 0.100000    | 5.18544e-16 | 3.80307e-16 | 2.80945e-16 | 2.08916e-16 | 1.56297e-16 |
| 0.0100000   | 2.29360e-21 | 1.75030e-21 | 1.35398e-21 | 1.06334e-21 | 8.50273e-22 |
| 0.00100000  | 5.87379e-26 | 5.21604e-26 | 4.90158e-26 | 4.95430e-26 | 5.46908e-26 |
| 0.000100000 | 1.41162e-29 | 1.65600e-29 | 2.15972e-29 | 3.13515e-29 | 5.04048e-29 |
| 1.00000e-05 | 1.90521e-32 | 2.89712e-32 | 4.93858e-32 | 9.41034e-32 | 1.99484e-31 |
| 1.00000e-06 | 8.33741e-35 | 1.54266e-34 | 3.23960e-34 | 7.70973e-34 | 2.05445e-33 |
| 1.00000e-07 | 7.62157e-37 | 1.66523e-36 | 4.25100e-36 | 1.24436e-35 | 4.03399e-35 |
| 1.00000e-08 | 1.00744e-38 | 2.80020e-38 | 9.30564e-38 | 3.42005e-37 | 1.31817e-36 |
| 1.00000e-09 | 3.61541e-40 | 1.16800e-39 | 4.47586e-39 | 1.81368e-38 | 7.49165e-38 |

| Pa\K        | 270.000     | 280.000     | 290.000     | 300.000     | 310.000     |
|-------------|-------------|-------------|-------------|-------------|-------------|
| 1.00000e+08 | 2.15083e-12 | 3.06988e-12 | 4.47005e-12 | 2.93990e-10 | 9.86857e-12 |
| 1.00000e+07 | 1.89469e-10 | 2.55096e-10 | 3.47725e-10 | 4.63023e-09 | 6.63086e-10 |
| 1.00000e+06 | 5.90062e-09 | 7.12512e-09 | 8.62455e-09 | 2.64397e-08 | 1.27126e-08 |
| 100000.     | 4.58436e-08 | 5.09608e-08 | 5.65806e-08 | 8.17126e-08 | 6.94013e-08 |
| 10000.0     | 2.43263e-08 | 2.38365e-08 | 2.33487e-08 | 1.98529e-08 | 2.23975e-08 |
| 1000.00     | 2.15956e-09 | 2.34236e-09 | 2.55512e-09 | 3.46093e-09 | 3.08021e-09 |
| 100.000     | 2.43205e-09 | 2.54792e-09 | 2.66633e-09 | 2.54226e-09 | 2.90682e-09 |
| 10.0000     | 6.23460e-10 | 5.96865e-10 | 5.68877e-10 | 4.22346e-10 | 5.09541e-10 |
| 1.00000     | 4.80549e-12 | 3.92748e-12 | 3.20358e-12 | 3.26571e-12 | 2.11939e-12 |
| 0.100000    | 1.17592e-16 | 8.89444e-17 | 6.76227e-17 | 6.73647e-16 | 3.96912e-17 |
| 0.0100000   | 6.95783e-22 | 5.87309e-22 | 5.17270e-22 | 1.02192e-19 | 4.83622e-22 |
| 0.00100000  | 6.65536e-26 | 8.92781e-26 | 1.30892e-25 | 9.59876e-23 | 3.47751e-25 |
| 0.000100000 | 8.90154e-29 | 1.70927e-28 | 3.52397e-28 | 4.55446e-25 | 1.74176e-27 |
| 1.00000e-05 | 4.65653e-31 | 1.17596e-30 | 3.14087e-30 | 5.18115e-27 | 2.42444e-29 |
| 1.00000e-06 | 5.98373e-33 | 1.84879e-32 | 5.89241e-32 | 9.28784e-29 | 6.04368e-31 |
| 1.00000e-07 | 1.39292e-34 | 4.95919e-34 | 1.77767e-33 | 1.83732e-30 | 2.19111e-32 |
| 1.00000e-08 | 5.17414e-36 | 2.02787e-35 | 7.83910e-35 | 5.63556e-32 | 1.08435e-33 |
| 1.00000e-09 | 3.09378e-37 | 1.26279e-36 | 5.05056e-36 | 3.50816e-33 | 7.38809e-35 |

| Pa\K        | 400.000     | 500.000     | 600.000     | 700.000     | 800.000     |
|-------------|-------------|-------------|-------------|-------------|-------------|
| 1.00000e+08 | 9.36165e-07 | 5.72077e-05 | 0.000165051 | 0.000217277 | 0.000170648 |
| 1.00000e+07 | 4.24329e-07 | 8.64645e-06 | 2.96781e-05 | 3.61040e-05 | 2.83249e-05 |
| 1.00000e+06 | 2.21270e-07 | 1.25790e-06 | 3.59887e-06 | 4.74072e-06 | 3.34125e-06 |
| 100000.     | 1.72803e-07 | 2.82306e-07 | 5.14899e-07 | 7.76526e-07 | 6.38730e-07 |
| 10000.0     | 2.07751e-08 | 4.29229e-08 | 1.02488e-07 | 1.42126e-07 | 1.27944e-07 |
| 1000.00     | 8.63189e-09 | 1.69353e-08 | 2.21371e-08 | 1.98215e-08 | 1.53436e-08 |
| 100.000     | 3.22336e-09 | 2.85911e-09 | 1.75881e-09 | 8.69241e-10 | 4.59436e-10 |
| 10.0000     | 2.00950e-10 | 6.83070e-11 | 1.97910e-11 | 6.27564e-12 | 3.00328e-12 |
| 1.00000     | 5.65569e-13 | 1.05958e-13 | 4.91887e-14 | 5.90478e-14 | 6.93325e-14 |
| 0.100000    | 1.26087e-16 | 2.88841e-16 | 1.54279e-15 | 3.71997e-15 | 5.30906e-15 |
| 0.0100000   | 3.13944e-19 | 8.19784e-18 | 8.09453e-17 | 2.46451e-16 | 3.86469e-16 |
| 0.00100000  | 4.49110e-21 | 2.99679e-19 | 4.52346e-18 | 1.60874e-17 | 2.64693e-17 |
| 0.000100000 | 9.99300e-23 | 1.27508e-20 | 2.60667e-19 | 1.02310e-18 | 1.71531e-18 |
| 1.00000e-05 | 3.01363e-24 | 5.78678e-22 | 1.42719e-20 | 5.88999e-20 | 9.86344e-20 |
| 1.00000e-06 | 1.02293e-25 | 2.19998e-23 | 5.60166e-22 | 2.28631e-21 | 3.76967e-21 |
| 1.00000e-07 | 3.37570e-27 | 5.00166e-25 | 9.78962e-24 | 3.74391e-23 | 6.21663e-23 |
| 1.00000e-08 | 1.68547e-28 | 1.61613e-26 | 1.41972e-25 | 4.03143e-25 | 6.66403e-25 |
| 1.00000e-09 | 1.21115e-29 | 1.12565e-27 | 7.07883e-27 | 1.46757e-26 | 2.11714e-26 |

| Pa\K        | 900.000     | 1000.00     | 1100.00     | 1200.00     | 1300.00     |
|-------------|-------------|-------------|-------------|-------------|-------------|
| 1.00000e+08 | 9.04848e-05 | 6.08345e-05 | 6.88521e-05 | 0.000119362 | 0.000217995 |
| 1.00000e+07 | 2.13480e-05 | 2.25014e-05 | 3.63200e-05 | 7.92017e-05 | 0.000188943 |
| 1.00000e+06 | 4.74508e-06 | 3.15733e-06 | 6.63095e-06 | 1.72103e-05 | 4.48949e-05 |
| 100000.     | 4.66016e-07 | 5.59216e-07 | 1.19213e-06 | 3.26020e-06 | 8.19417e-06 |
| 10000.0     | 1.11655e-07 | 1.39813e-07 | 2.63418e-07 | 6.40767e-07 | 1.45918e-06 |
| 1000.00     | 1.21976e-08 | 1.27173e-08 | 2.01510e-08 | 5.12825e-08 | 1.32226e-07 |
| 100.000     | 2.77358e-10 | 2.46582e-10 | 4.95137e-10 | 2.44635e-09 | 9.26805e-09 |
| 10.0000     | 2.02344e-12 | 2.55126e-12 | 1.51317e-11 | 1.55893e-10 | 7.45944e-10 |
| 1.00000     | 7.42729e-14 | 1.15242e-13 | 9.69956e-13 | 1.25749e-11 | 6.61994e-11 |
| 0.100000    | 5.97375e-15 | 8.70932e-15 | 7.70140e-14 | 1.11064e-12 | 6.15776e-12 |
| 0.0100000   | 4.40328e-16 | 6.23458e-16 | 6.61749e-15 | 1.03360e-13 | 5.90386e-13 |
| 0.00100000  | 2.97061e-17 | 4.24021e-17 | 6.01515e-16 | 9.93737e-15 | 5.76866e-14 |
| 0.000100000 | 1.86753e-18 | 2.88041e-18 | 5.71841e-17 | 9.76674e-16 | 5.71177e-15 |
| 1.00000e-05 | 1.03708e-19 | 1.99711e-19 | 5.61009e-18 | 9.73524e-17 | 5.70267e-16 |
| 1.00000e-06 | 3.89094e-21 | 1.39361e-20 | 5.55650e-19 | 9.72878e-18 | 5.70148e-17 |
| 1.00000e-07 | 7.32838e-23 | 1.11842e-21 | 5.53408e-20 | 9.72686e-19 | 5.70127e-18 |

|             |             |             |             |             |             |
|-------------|-------------|-------------|-------------|-------------|-------------|
| 1.00000e-08 | 1.71470e-24 | 1.06833e-22 | 5.52977e-21 | 9.72648e-20 | 5.70123e-19 |
| 1.00000e-09 | 1.20758e-25 | 1.06321e-23 | 5.52920e-22 | 9.72640e-21 | 5.70122e-20 |

| Pa\K        | 1400.00     | 1500.00     | 1750.00     | 2000.00     | 2250.00     |
|-------------|-------------|-------------|-------------|-------------|-------------|
| 1.00000e+08 | 0.000319387 | 0.000379910 | 8.55446e-05 | 8.98468e-05 | 8.46006e-05 |
| 1.00000e+07 | 0.000361067 | 0.000509444 | 3.33544e-05 | 3.48605e-05 | 3.34764e-05 |
| 1.00000e+06 | 9.52549e-05 | 0.000146548 | 1.56350e-05 | 1.42335e-05 | 1.16147e-05 |
| 100000.     | 1.58047e-05 | 2.28018e-05 | 5.22810e-06 | 3.41217e-06 | 2.11739e-06 |
| 10000.0     | 2.44713e-06 | 3.10300e-06 | 8.51696e-07 | 4.42830e-07 | 2.39466e-07 |
| 1000.00     | 2.33792e-07 | 2.99005e-07 | 9.10418e-08 | 4.51274e-08 | 2.37947e-08 |
| 100.000     | 1.92657e-08 | 2.64832e-08 | 8.91695e-09 | 4.44510e-09 | 2.34327e-09 |
| 10.0000     | 1.70471e-09 | 2.45114e-09 | 8.74848e-10 | 4.39223e-10 | 2.31881e-10 |
| 1.00000     | 1.58769e-10 | 2.34145e-10 | 8.64630e-11 | 4.35884e-11 | 2.30333e-11 |
| 0.100000    | 1.51936e-11 | 2.27588e-11 | 8.58459e-12 | 4.33798e-12 | 2.29354e-12 |
| 0.0100000   | 1.48071e-12 | 2.23838e-12 | 8.54447e-13 | 4.32431e-13 | 2.28711e-13 |
| 0.00100000  | 1.45969e-13 | 2.21775e-13 | 8.53262e-14 | 4.32045e-14 | 2.28538e-14 |
| 0.000100000 | 1.45094e-14 | 2.20931e-14 | 8.53100e-15 | 4.31994e-15 | 2.28516e-15 |
| 1.00000e-05 | 1.44959e-15 | 2.20804e-15 | 8.53076e-16 | 4.31987e-16 | 2.28514e-16 |
| 1.00000e-06 | 1.44943e-16 | 2.20789e-16 | 8.53070e-17 | 4.31985e-17 | 2.28513e-17 |
| 1.00000e-07 | 1.44941e-17 | 2.20787e-17 | 8.53070e-18 | 4.31984e-18 | 2.28513e-18 |
| 1.00000e-08 | 1.44941e-18 | 2.20786e-18 | 8.53070e-19 | 4.31984e-19 | 2.28513e-19 |
| 1.00000e-09 | 1.44940e-19 | 2.20786e-19 | 8.53070e-20 | 4.31984e-20 | 2.28513e-20 |

Phenyl+cycC3H4

| Pa\K        | 20.0000     | 30.0000     | 40.0000     | 50.0000     | 60.0000     |
|-------------|-------------|-------------|-------------|-------------|-------------|
| 1.00000e+08 | 8.04586e-18 | 1.91196e-17 | 4.18900e-17 | 8.78414e-17 | 1.74045e-16 |
| 1.00000e+07 | 3.43288e-17 | 5.63985e-17 | 1.07896e-16 | 2.10175e-16 | 3.92093e-16 |
| 1.00000e+06 | 3.40837e-17 | 5.53642e-17 | 1.16100e-16 | 2.34401e-16 | 4.40306e-16 |
| 100000.     | 2.85868e-17 | 5.29012e-17 | 1.15798e-16 | 2.36450e-16 | 4.45360e-16 |
| 10000.0     | 2.78226e-17 | 5.25975e-17 | 1.15744e-16 | 2.36646e-16 | 4.45865e-16 |
| 1000.00     | 2.77435e-17 | 5.25665e-17 | 1.15739e-16 | 2.36666e-16 | 4.45916e-16 |
| 100.000     | 2.77356e-17 | 5.25634e-17 | 1.15738e-16 | 2.36668e-16 | 4.45921e-16 |
| 10.0000     | 2.77348e-17 | 5.25631e-17 | 1.15738e-16 | 2.36668e-16 | 4.45921e-16 |
| 1.00000     | 2.77347e-17 | 5.25631e-17 | 1.15738e-16 | 2.36668e-16 | 4.45921e-16 |
| 0.100000    | 2.77347e-17 | 5.25631e-17 | 1.15738e-16 | 2.36668e-16 | 4.45921e-16 |
| 0.0100000   | 2.77347e-17 | 5.25631e-17 | 1.15738e-16 | 2.36668e-16 | 4.45921e-16 |
| 0.00100000  | 2.77347e-17 | 5.25631e-17 | 1.15738e-16 | 2.36668e-16 | 4.45921e-16 |
| 0.000100000 | 2.77347e-17 | 5.25631e-17 | 1.15738e-16 | 2.36668e-16 | 4.45921e-16 |
| 1.00000e-05 | 2.77347e-17 | 5.25631e-17 | 1.15738e-16 | 2.36668e-16 | 4.45921e-16 |
| 1.00000e-06 | 2.77347e-17 | 5.25631e-17 | 1.15738e-16 | 2.36668e-16 | 4.45921e-16 |
| 1.00000e-07 | 2.77347e-17 | 5.25631e-17 | 1.15738e-16 | 2.36668e-16 | 4.45921e-16 |
| 1.00000e-08 | 2.77347e-17 | 5.25631e-17 | 1.15738e-16 | 2.36668e-16 | 4.45921e-16 |
| 1.00000e-09 | 2.77347e-17 | 5.25631e-17 | 1.15738e-16 | 2.36668e-16 | 4.45921e-16 |

| Pa\K        | 70.0000     | 80.0000     | 90.0000     | 100.000     | 110.000     |
|-------------|-------------|-------------|-------------|-------------|-------------|
| 1.00000e+08 | 3.26585e-16 | 5.84536e-16 | 1.00607e-15 | 1.67819e-15 | 2.73192e-15 |
| 1.00000e+07 | 6.95493e-16 | 1.17951e-15 | 1.92810e-15 | 3.06234e-15 | 4.75932e-15 |
| 1.00000e+06 | 7.77764e-16 | 1.30842e-15 | 2.11934e-15 | 3.33570e-15 | 5.14020e-15 |
| 100000.     | 7.86796e-16 | 1.32270e-15 | 2.14046e-15 | 3.36569e-15 | 5.18165e-15 |
| 10000.0     | 7.87707e-16 | 1.32414e-15 | 2.14260e-15 | 3.36872e-15 | 5.18583e-15 |
| 1000.00     | 7.87799e-16 | 1.32429e-15 | 2.14281e-15 | 3.36902e-15 | 5.18625e-15 |
| 100.000     | 7.87808e-16 | 1.32430e-15 | 2.14283e-15 | 3.36905e-15 | 5.18629e-15 |
| 10.0000     | 7.87809e-16 | 1.32430e-15 | 2.14284e-15 | 3.36905e-15 | 5.18630e-15 |
| 1.00000     | 7.87809e-16 | 1.32430e-15 | 2.14284e-15 | 3.36905e-15 | 5.18630e-15 |
| 0.100000    | 7.87809e-16 | 1.32430e-15 | 2.14284e-15 | 3.36905e-15 | 5.18630e-15 |
| 0.0100000   | 7.87809e-16 | 1.32430e-15 | 2.14284e-15 | 3.36905e-15 | 5.18630e-15 |
| 0.00100000  | 7.87809e-16 | 1.32430e-15 | 2.14284e-15 | 3.36905e-15 | 5.18630e-15 |
| 0.000100000 | 7.87809e-16 | 1.32430e-15 | 2.14284e-15 | 3.36905e-15 | 5.18630e-15 |
| 1.00000e-05 | 7.87809e-16 | 1.32430e-15 | 2.14284e-15 | 3.36905e-15 | 5.18630e-15 |
| 1.00000e-06 | 7.87809e-16 | 1.32430e-15 | 2.14284e-15 | 3.36905e-15 | 5.18630e-15 |
| 1.00000e-07 | 7.87809e-16 | 1.32430e-15 | 2.14284e-15 | 3.36905e-15 | 5.18630e-15 |
| 1.00000e-08 | 7.87809e-16 | 1.32430e-15 | 2.14284e-15 | 3.36905e-15 | 5.18630e-15 |
| 1.00000e-09 | 7.87809e-16 | 1.32430e-15 | 2.14284e-15 | 3.36905e-15 | 5.18630e-15 |

| Pa\K        | 120.000     | 130.000     | 140.000     | 150.000     | 160.000     |
|-------------|-------------|-------------|-------------|-------------|-------------|
| 1.00000e+08 | 4.36579e-15 | 6.88161e-15 | 1.07387e-14 | 1.66354e-14 | 2.56308e-14 |
| 1.00000e+07 | 7.28066e-15 | 1.10147e-14 | 1.65390e-14 | 2.47117e-14 | 3.68056e-14 |
| 1.00000e+06 | 7.80208e-15 | 1.17201e-14 | 1.74858e-14 | 2.59757e-14 | 3.84866e-14 |
| 100000.     | 7.85837e-15 | 1.17957e-14 | 1.75865e-14 | 2.61093e-14 | 3.86632e-14 |
| 10000.0     | 7.86405e-15 | 1.18033e-14 | 1.75966e-14 | 2.61227e-14 | 3.86810e-14 |
| 1000.00     | 7.86462e-15 | 1.18041e-14 | 1.75977e-14 | 2.61241e-14 | 3.86827e-14 |
| 100.000     | 7.86467e-15 | 1.18041e-14 | 1.75978e-14 | 2.61242e-14 | 3.86829e-14 |
| 10.0000     | 7.86468e-15 | 1.18041e-14 | 1.75978e-14 | 2.61242e-14 | 3.86829e-14 |
| 1.00000     | 7.86468e-15 | 1.18041e-14 | 1.75978e-14 | 2.61242e-14 | 3.86829e-14 |
| 0.100000    | 7.86468e-15 | 1.18041e-14 | 1.75978e-14 | 2.61242e-14 | 3.86829e-14 |

|             |             |             |             |             |             |
|-------------|-------------|-------------|-------------|-------------|-------------|
| 0.0100000   | 7.86468e-15 | 1.18041e-14 | 1.75978e-14 | 2.61242e-14 | 3.86829e-14 |
| 0.00100000  | 7.86468e-15 | 1.18041e-14 | 1.75978e-14 | 2.61242e-14 | 3.86829e-14 |
| 0.000100000 | 7.86468e-15 | 1.18041e-14 | 1.75978e-14 | 2.61242e-14 | 3.86829e-14 |
| 1.00000e-05 | 7.86468e-15 | 1.18041e-14 | 1.75978e-14 | 2.61242e-14 | 3.86829e-14 |
| 1.00000e-06 | 7.86468e-15 | 1.18041e-14 | 1.75978e-14 | 2.61242e-14 | 3.86829e-14 |
| 1.00000e-07 | 7.86468e-15 | 1.18041e-14 | 1.75978e-14 | 2.61242e-14 | 3.86829e-14 |
| 1.00000e-08 | 7.86468e-15 | 1.18041e-14 | 1.75978e-14 | 2.61242e-14 | 3.86829e-14 |
| 1.00000e-09 | 7.86468e-15 | 1.18041e-14 | 1.75978e-14 | 2.61242e-14 | 3.86829e-14 |

| Pa\K        | 170.000     | 180.000     | 190.000     | 200.000     | 210.000     |
|-------------|-------------|-------------|-------------|-------------|-------------|
| 1.00000e+08 | 3.93271e-14 | 6.01368e-14 | 9.16795e-14 | 1.39360e-13 | 2.11215e-13 |
| 1.00000e+07 | 5.47020e-14 | 8.11728e-14 | 1.20286e-13 | 1.77983e-13 | 2.62903e-13 |
| 1.00000e+06 | 5.69302e-14 | 8.41162e-14 | 1.24157e-13 | 1.83045e-13 | 2.69476e-13 |
| 100000.     | 5.71631e-14 | 8.44223e-14 | 1.24558e-13 | 1.83567e-13 | 2.70151e-13 |
| 10000.0     | 5.71865e-14 | 8.44531e-14 | 1.24598e-13 | 1.83620e-13 | 2.70219e-13 |
| 1000.00     | 5.71889e-14 | 8.44562e-14 | 1.24602e-13 | 1.83625e-13 | 2.70226e-13 |
| 100.000     | 5.71891e-14 | 8.44565e-14 | 1.24603e-13 | 1.83626e-13 | 2.70226e-13 |
| 10.0000     | 5.71891e-14 | 8.44565e-14 | 1.24603e-13 | 1.83626e-13 | 2.70226e-13 |
| 1.00000     | 5.71891e-14 | 8.44565e-14 | 1.24603e-13 | 1.83626e-13 | 2.70226e-13 |
| 0.100000    | 5.71891e-14 | 8.44565e-14 | 1.24603e-13 | 1.83626e-13 | 2.70226e-13 |
| 0.0100000   | 5.71891e-14 | 8.44565e-14 | 1.24603e-13 | 1.83626e-13 | 2.70226e-13 |
| 0.00100000  | 5.71891e-14 | 8.44565e-14 | 1.24603e-13 | 1.83626e-13 | 2.70226e-13 |
| 0.000100000 | 5.71891e-14 | 8.44565e-14 | 1.24603e-13 | 1.83626e-13 | 2.70226e-13 |
| 1.00000e-05 | 5.71891e-14 | 8.44565e-14 | 1.24603e-13 | 1.83626e-13 | 2.70226e-13 |
| 1.00000e-06 | 5.71891e-14 | 8.44565e-14 | 1.24603e-13 | 1.83626e-13 | 2.70226e-13 |
| 1.00000e-07 | 5.71891e-14 | 8.44565e-14 | 1.24603e-13 | 1.83626e-13 | 2.70226e-13 |
| 1.00000e-08 | 5.71891e-14 | 8.44565e-14 | 1.24603e-13 | 1.83626e-13 | 2.70226e-13 |
| 1.00000e-09 | 5.71891e-14 | 8.44565e-14 | 1.24603e-13 | 1.83626e-13 | 2.70226e-13 |

| Pa\K        | 220.000     | 230.000     | 240.000     | 250.000     | 260.000     |
|-------------|-------------|-------------|-------------|-------------|-------------|
| 1.00000e+08 | 3.19127e-13 | 4.80590e-13 | 7.21209e-13 | 1.07825e-12 | 1.60555e-12 |
| 1.00000e+07 | 3.87552e-13 | 5.69916e-13 | 8.35731e-13 | 1.22157e-12 | 1.77900e-12 |
| 1.00000e+06 | 3.95996e-13 | 5.80617e-13 | 8.49043e-13 | 1.23771e-12 | 1.79786e-12 |
| 100000.     | 3.96860e-13 | 5.81708e-13 | 8.50395e-13 | 1.23934e-12 | 1.79976e-12 |
| 10000.0     | 3.96946e-13 | 5.81817e-13 | 8.50530e-13 | 1.23950e-12 | 1.79995e-12 |
| 1000.00     | 3.96955e-13 | 5.81828e-13 | 8.50544e-13 | 1.23952e-12 | 1.79997e-12 |
| 100.000     | 3.96956e-13 | 5.81829e-13 | 8.50545e-13 | 1.23952e-12 | 1.79997e-12 |
| 10.0000     | 3.96956e-13 | 5.81829e-13 | 8.50545e-13 | 1.23952e-12 | 1.79997e-12 |
| 1.00000     | 3.96956e-13 | 5.81829e-13 | 8.50545e-13 | 1.23952e-12 | 1.79997e-12 |
| 0.100000    | 3.96956e-13 | 5.81829e-13 | 8.50545e-13 | 1.23952e-12 | 1.79997e-12 |
| 0.0100000   | 3.96956e-13 | 5.81829e-13 | 8.50545e-13 | 1.23952e-12 | 1.79997e-12 |
| 0.00100000  | 3.96956e-13 | 5.81829e-13 | 8.50545e-13 | 1.23952e-12 | 1.79997e-12 |
| 0.000100000 | 3.96956e-13 | 5.81829e-13 | 8.50545e-13 | 1.23952e-12 | 1.79997e-12 |
| 1.00000e-05 | 3.96956e-13 | 5.81829e-13 | 8.50545e-13 | 1.23952e-12 | 1.79997e-12 |
| 1.00000e-06 | 3.96956e-13 | 5.81829e-13 | 8.50545e-13 | 1.23952e-12 | 1.79997e-12 |
| 1.00000e-07 | 3.96956e-13 | 5.81829e-13 | 8.50545e-13 | 1.23952e-12 | 1.79997e-12 |
| 1.00000e-08 | 3.96956e-13 | 5.81829e-13 | 8.50545e-13 | 1.23952e-12 | 1.79997e-12 |
| 1.00000e-09 | 3.96956e-13 | 5.81829e-13 | 8.50545e-13 | 1.23952e-12 | 1.79997e-12 |

| Pa\K        | 270.000     | 280.000     | 290.000     | 300.000     | 310.000     |
|-------------|-------------|-------------|-------------|-------------|-------------|
| 1.00000e+08 | 2.38025e-12 | 3.51165e-12 | 5.15238e-12 | 1.28353e-11 | 1.08688e-11 |
| 1.00000e+07 | 2.58008e-12 | 3.72431e-12 | 5.34711e-12 | 8.62884e-12 | 1.08073e-11 |
| 1.00000e+06 | 2.60088e-12 | 3.74512e-12 | 5.36400e-12 | 8.25122e-12 | 1.07903e-11 |
| 100000.     | 2.60297e-12 | 3.74720e-12 | 5.36566e-12 | 8.21398e-12 | 1.07884e-11 |
| 10000.0     | 2.60318e-12 | 3.74739e-12 | 5.36582e-12 | 8.21025e-12 | 1.07882e-11 |
| 1000.00     | 2.60320e-12 | 3.74741e-12 | 5.36584e-12 | 8.20988e-12 | 1.07882e-11 |
| 100.000     | 2.60320e-12 | 3.74742e-12 | 5.36584e-12 | 8.20984e-12 | 1.07882e-11 |
| 10.0000     | 2.60320e-12 | 3.74742e-12 | 5.36584e-12 | 8.20984e-12 | 1.07882e-11 |
| 1.00000     | 2.60320e-12 | 3.74742e-12 | 5.36584e-12 | 8.20984e-12 | 1.07882e-11 |
| 0.100000    | 2.60320e-12 | 3.74742e-12 | 5.36584e-12 | 8.20984e-12 | 1.07882e-11 |
| 0.0100000   | 2.60320e-12 | 3.74742e-12 | 5.36584e-12 | 8.20984e-12 | 1.07882e-11 |
| 0.00100000  | 2.60320e-12 | 3.74742e-12 | 5.36584e-12 | 8.20984e-12 | 1.07882e-11 |
| 0.000100000 | 2.60320e-12 | 3.74742e-12 | 5.36584e-12 | 8.20984e-12 | 1.07882e-11 |
| 1.00000e-05 | 2.60320e-12 | 3.74742e-12 | 5.36584e-12 | 8.20984e-12 | 1.07882e-11 |
| 1.00000e-06 | 2.60320e-12 | 3.74742e-12 | 5.36584e-12 | 8.20984e-12 | 1.07882e-11 |
| 1.00000e-07 | 2.60320e-12 | 3.74742e-12 | 5.36584e-12 | 8.20984e-12 | 1.07882e-11 |
| 1.00000e-08 | 2.60320e-12 | 3.74742e-12 | 5.36584e-12 | 8.20984e-12 | 1.07882e-11 |
| 1.00000e-09 | 2.60320e-12 | 3.74742e-12 | 5.36584e-12 | 8.20984e-12 | 1.07882e-11 |

| Pa\K        | 400.000     | 500.000     | 600.000     | 700.000     | 800.000     |
|-------------|-------------|-------------|-------------|-------------|-------------|
| 1.00000e+08 | 6.90116e-10 | 7.80279e-08 | 1.21067e-05 | 0.000237530 | 0.000658211 |
| 1.00000e+07 | 2.55189e-10 | 7.60657e-09 | 7.80222e-07 | 2.33597e-05 | 7.95124e-05 |
| 1.00000e+06 | 2.25486e-10 | 3.92877e-09 | 1.06456e-07 | 2.56395e-06 | 9.30756e-06 |
| 100000.     | 2.22643e-10 | 3.59351e-09 | 4.28057e-08 | 4.78675e-07 | 2.07710e-06 |
| 10000.0     | 2.22360e-10 | 3.56029e-09 | 3.65009e-08 | 2.70349e-07 | 1.34512e-06 |
| 1000.00     | 2.22331e-10 | 3.55696e-09 | 3.58721e-08 | 2.49579e-07 | 1.27220e-06 |

|             |             |             |             |             |             |
|-------------|-------------|-------------|-------------|-------------|-------------|
| 100.000     | 2.22329e-10 | 3.55663e-09 | 3.58093e-08 | 2.47504e-07 | 1.26494e-06 |
| 10.0000     | 2.22328e-10 | 3.55660e-09 | 3.58031e-08 | 2.47297e-07 | 1.26421e-06 |
| 1.00000     | 2.22328e-10 | 3.55660e-09 | 3.58024e-08 | 2.47276e-07 | 1.26414e-06 |
| 0.100000    | 2.22328e-10 | 3.55660e-09 | 3.58023e-08 | 2.47273e-07 | 1.26413e-06 |
| 0.0100000   | 2.22328e-10 | 3.55660e-09 | 3.58023e-08 | 2.47273e-07 | 1.26413e-06 |
| 0.00100000  | 2.22328e-10 | 3.55660e-09 | 3.58023e-08 | 2.47273e-07 | 1.26413e-06 |
| 0.000100000 | 2.22328e-10 | 3.55660e-09 | 3.58023e-08 | 2.47273e-07 | 1.26413e-06 |
| 1.00000e-05 | 2.22328e-10 | 3.55660e-09 | 3.58023e-08 | 2.47273e-07 | 1.26413e-06 |
| 1.00000e-06 | 2.22328e-10 | 3.55660e-09 | 3.58023e-08 | 2.47273e-07 | 1.26413e-06 |
| 1.00000e-07 | 2.22328e-10 | 3.55660e-09 | 3.58023e-08 | 2.47273e-07 | 1.26413e-06 |
| 1.00000e-08 | 2.22328e-10 | 3.55660e-09 | 3.58023e-08 | 2.47273e-07 | 1.26413e-06 |
| 1.00000e-09 | 2.22328e-10 | 3.55660e-09 | 3.58023e-08 | 2.47273e-07 | 1.26413e-06 |

| Pa\K        | 900.000     | 1000.00     | 1100.00     | 1200.00     | 1300.00     |
|-------------|-------------|-------------|-------------|-------------|-------------|
| 1.00000e+08 | 0.000834548 | 0.000843143 | 0.000804582 | 0.000783855 | 0.000824568 |
| 1.00000e+07 | 0.000108115 | 0.000118811 | 0.000139292 | 0.000196793 | 0.000326276 |
| 1.00000e+06 | 1.57389e-05 | 2.73676e-05 | 5.69591e-05 | 0.000125720 | 0.000267318 |
| 100000.     | 6.19965e-06 | 1.79691e-05 | 4.85315e-05 | 0.000118462 | 0.000261305 |
| 10000.0     | 5.19964e-06 | 1.69547e-05 | 4.76032e-05 | 0.000117647 | 0.000260616 |
| 1000.00     | 5.09265e-06 | 1.68264e-05 | 4.74734e-05 | 0.000117531 | 0.000260520 |
| 100.000     | 5.08123e-06 | 1.68097e-05 | 4.74555e-05 | 0.000117515 | 0.000260508 |
| 10.0000     | 5.08007e-06 | 1.68080e-05 | 4.74537e-05 | 0.000117514 | 0.000260507 |
| 1.00000     | 5.07996e-06 | 1.68078e-05 | 4.74535e-05 | 0.000117514 | 0.000260506 |
| 0.100000    | 5.07995e-06 | 1.68078e-05 | 4.74535e-05 | 0.000117514 | 0.000260506 |
| 0.0100000   | 5.07995e-06 | 1.68078e-05 | 4.74535e-05 | 0.000117514 | 0.000260506 |
| 0.00100000  | 5.07995e-06 | 1.68078e-05 | 4.74535e-05 | 0.000117514 | 0.000260506 |
| 0.000100000 | 5.07995e-06 | 1.68078e-05 | 4.74535e-05 | 0.000117514 | 0.000260506 |
| 1.00000e-05 | 5.07995e-06 | 1.68078e-05 | 4.74535e-05 | 0.000117514 | 0.000260506 |
| 1.00000e-06 | 5.07995e-06 | 1.68078e-05 | 4.74535e-05 | 0.000117514 | 0.000260506 |
| 1.00000e-07 | 5.07995e-06 | 1.68078e-05 | 4.74535e-05 | 0.000117514 | 0.000260506 |
| 1.00000e-08 | 5.07995e-06 | 1.68078e-05 | 4.74535e-05 | 0.000117514 | 0.000260506 |
| 1.00000e-09 | 5.07995e-06 | 1.68078e-05 | 4.74535e-05 | 0.000117514 | 0.000260506 |

| Pa\K        | 1400.00     | 1500.00     | 1750.00    | 2000.00    | 2250.00   |
|-------------|-------------|-------------|------------|------------|-----------|
| 1.00000e+08 | 0.000970565 | 0.00126607  | 0.0330971  | 0.0320280  | 0.0368301 |
| 1.00000e+07 | 0.000574256 | 0.000990108 | 0.00679104 | 0.0118747  | 0.0218504 |
| 1.00000e+06 | 0.000528626 | 0.000959682 | 0.00385962 | 0.00965895 | 0.0202236 |
| 100000.     | 0.000523975 | 0.000956588 | 0.00354480 | 0.00941861 | 0.0200474 |
| 10000.0     | 0.000523428 | 0.000956200 | 0.00350277 | 0.00938895 | 0.0200273 |
| 1000.00     | 0.000523354 | 0.000956153 | 0.00349716 | 0.00938557 | 0.0200252 |
| 100.000     | 0.000523345 | 0.000956146 | 0.00349656 | 0.00938519 | 0.0200250 |
| 10.0000     | 0.000523345 | 0.000956146 | 0.00349650 | 0.00938519 | 0.0200250 |
| 1.00000     | 0.000523345 | 0.000956146 | 0.00349649 | 0.00938519 | 0.0200250 |
| 0.100000    | 0.000523345 | 0.000956146 | 0.00349649 | 0.00938519 | 0.0200250 |
| 0.0100000   | 0.000523345 | 0.000956146 | 0.00349649 | 0.00938519 | 0.0200250 |
| 0.00100000  | 0.000523345 | 0.000956146 | 0.00349649 | 0.00938519 | 0.0200250 |
| 0.000100000 | 0.000523345 | 0.000956146 | 0.00349649 | 0.00938519 | 0.0200250 |
| 1.00000e-05 | 0.000523345 | 0.000956146 | 0.00349649 | 0.00938519 | 0.0200250 |
| 1.00000e-06 | 0.000523345 | 0.000956146 | 0.00349649 | 0.00938519 | 0.0200250 |
| 1.00000e-07 | 0.000523345 | 0.000956146 | 0.00349649 | 0.00938519 | 0.0200250 |
| 1.00000e-08 | 0.000523345 | 0.000956146 | 0.00349649 | 0.00938519 | 0.0200250 |
| 1.00000e-09 | 0.000523345 | 0.000956146 | 0.00349649 | 0.00938519 | 0.0200250 |
