# Supplementary material for: Reactions of chemically activated C9H9 species II: The reaction of phenyl radicals with allene and cyclopropene, and of benzyl radicals with acetyleneElectronic supplementary information (ESI) available: Full [C9H9] reaction scheme. Additional quantum chemical calculations not reported yet in earlier publications. Full product distribution and over-all rate coefficient listings, both uncorrected and effective data, for all reaction conditions examined. For the most important products, tables are included listing the yield as function of temperature and pressure. Modified Arrhenius fits for the over-all TST rate coefficient and the TST rate coefficient of the different entrance channels are listed for different temperature intervals. See http://www.rsc.org/suppdata/cp/b3/b303908k/ or contact the authors directly, or download from the website http://arrhenius.chem.kuleuven.ac.be.
Source: Royal Society of Chemistry journal article supplement (doi:10.1039/b303908k), 2003-01-01
Supplement: quantum.pdf [file quantum.pdf]

# Reactions of chemically activated C<sub>9</sub>H<sub>9</sub> species II: The reaction of phenyl radicals with allene and cyclopropopene, and of benzyl with acetylene

- Supporting information -

Luc Vereecken, Jozef Peeters

Submitted to Phys. Chem. Chem. Phys

---

## Content

Page 1 : Additional B3LYP-DFT calculations

Page 2 : Additional CCSD(T) calculations on entrance channels

Page 3 : [C<sub>9</sub>H<sub>9</sub>] Reaction scheme (see L. Vereecken, H. F. Bettinger, R. I. KAiser, P. v. R. Schleyer, H. F. Schaefer, III, *J. Am. Chem. Soc.* 2002, **124**, 2781.)

## Additional B3LYP-DFT calculations

At elevated temperatures, it was found that a significant fraction of the chemically activated C<sub>9</sub>H<sub>9</sub> intermediates formed in the benzyl + C<sub>2</sub>H<sub>2</sub> reaction isomerized to the RAD47 intermediate at some point during their lifetime. To avoid biasing the predicted product distribution, this radical was unfrozen, and the most important of its subsequent reactions were included in the RRKM-Master Equation analyses. As can be seen from the table below, the most favorable reaction path by far for RAD47 is re-isomerization to RAD36 or RAD45. All other pathways conceivable were either estimated to have even higher barriers based on general chemical principle and analogous reactions, or the reaction products were proven to be unstable at the levels of theory used here.

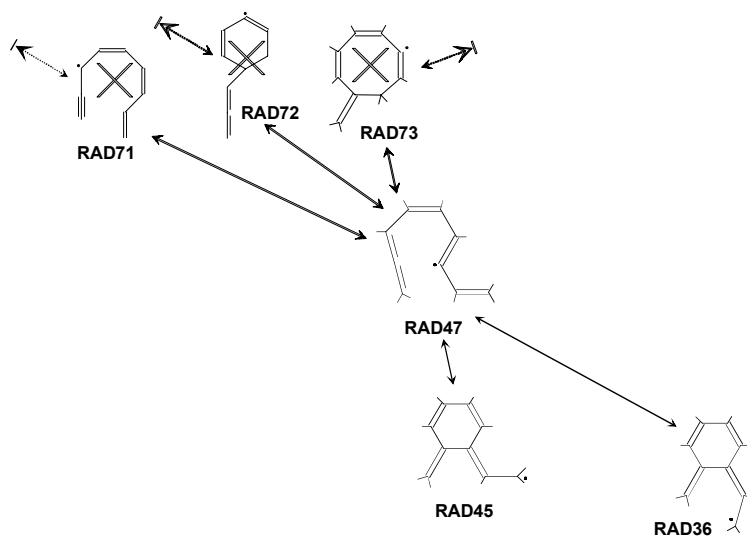

The figure above fits into the main PES near RAD47 (upper left corner of the RHS half as shown lower in this supporting information).

B3LYP-DFT energies in Hartree, ZPE in Hartree,  $E_{\text{rel}}$  is relative energy in kJ/mol relative to RAD23.

| Compound      | B3LYP-DFT<br>6-31G* | ZPE      | $E_{\text{rel}}$<br>kJ/mol | B3LYP-DFT<br>6-311+G(d,p) | $E_{\text{rel}}$<br>kJ/mol |
|---------------|---------------------|----------|----------------------------|---------------------------|----------------------------|
| RAD47         | -348.186705666      | 0.142489 | 385.95                     | -348.284764622            | 359.33                     |
| RAD71         | -348.222705219      | 0.143964 | 295.31                     | -348.322545337            | 264.01                     |
| RAD72         | -348.193562410      | 0.146983 | 379.75                     | -348.288696497            | 360.81                     |
| RAD73         | -348.237588739      | 0.148043 | 266.94                     | -348.330930377            | 252.71                     |
| tsrad36_rad47 | -348.182101842      | 0.142351 | 397.68                     | -348.279198142            | 373.59                     |
| tsrad45_rad47 | -348.182318901      | 0.142265 | 396.88                     | -348.279817189            | 371.73                     |
| tsrad47_rad71 | -348.152043865      | 0.139057 | 467.94                     | -348.250398657            | 440.55                     |
| tsrad47_rad72 | -348.138035494      | 0.143478 | 516.33                     | -348.235192314            | 492.08                     |
| tsrad47_rad73 | -348.164401736      | 0.144134 | 448.83                     | -348.260817793            | 426.52                     |

## Additional CCSD(T) calculations on entrance channels

Single point CCSD(T)/6-31G(d,p) calculations on reactants and entrance transition states, using the B3LYP-DFT/6-311+G(d,p) geometries. The relative energy  $E_{\text{rel}}$  is calculated using the ZPE-corrections at the same B3LYP level of theory.

| Compound                                       | CCSD(T)/6-311G(d,p) //<br>B3LYP-DFT/6-311+G(d,p) | $E_{\text{rel}}$<br>kJ/mol |
|------------------------------------------------|--------------------------------------------------|----------------------------|
| <b>phenyl+propyne</b>                          | -347.325773                                      | 285.0                      |
| TSrad1_Phenyl+propyne                          | -347.320725                                      | 299.1                      |
| TSrad4_Phenyl+propyne                          | -347.318793                                      | 304.2                      |
| TSPH+propyne_Benzene+2-propynyl                | -347.313746                                      | 306.0                      |
| <b>phenyl+allene</b>                           | -347.322746                                      | 292.5                      |
| TSrad6_Phenyl+Allene                           | -347.315752                                      | 310.4                      |
| TSrad11_Phenyl+Allene                          | -347.317872                                      | 307.0                      |
| TSPhenyl+Allene_Benzene+2-propynyl             | -347.308840                                      | 317.0                      |
| <b>C2H2+PhCH2</b>                              | -347.355316                                      | 202.8                      |
| TSrad20_C2H2+PhCH2                             | -347.335891                                      | 258.4                      |
| <b>phenyl+cyclopropene</b>                     | -347.288678                                      | 383.9                      |
| TSrad19_Phenyl+cyclopropene                    | -347.287705                                      | 387.6                      |
| TSPhenyl+cyclopropene_benzene+cycloprop-2-enyl | -347.275948                                      | 405.7                      |
| TSPhenyl+cyclopropene_benzene+cycloprop-1-enyl | -347.270399                                      | 420.1                      |

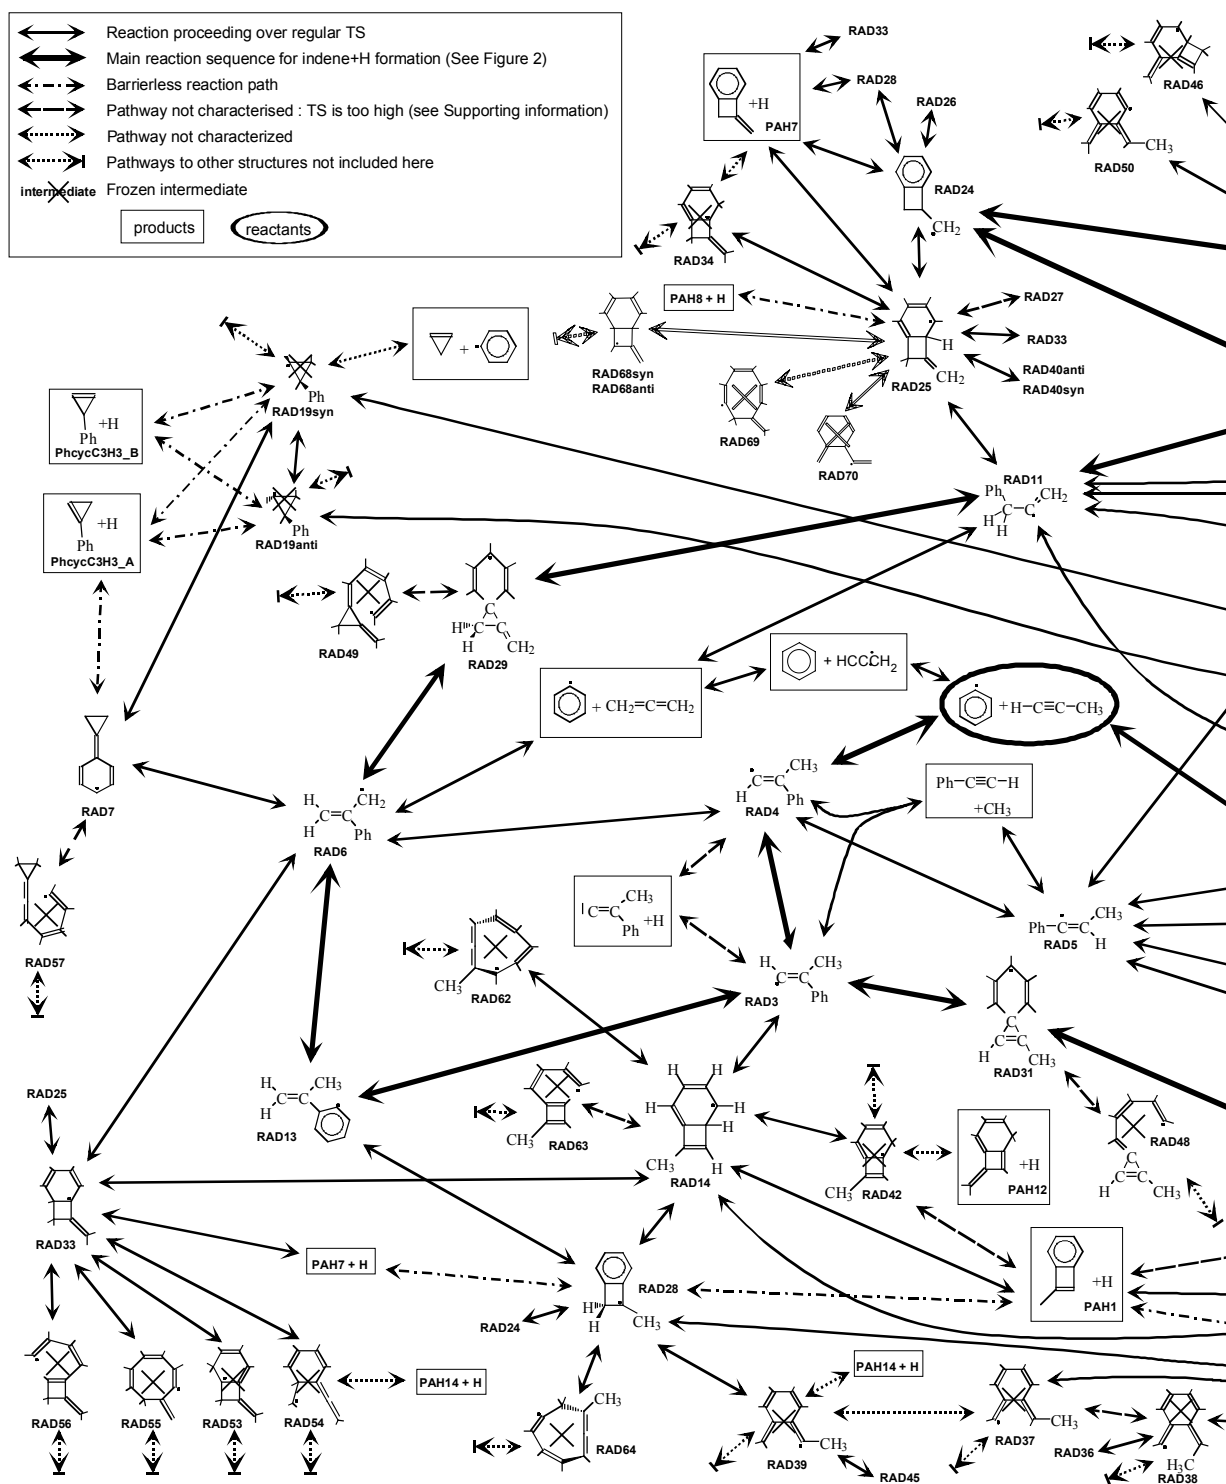

**Figure SI - 1 : Reaction scheme for phenyl + propyne**  
 (Left Hand Side)

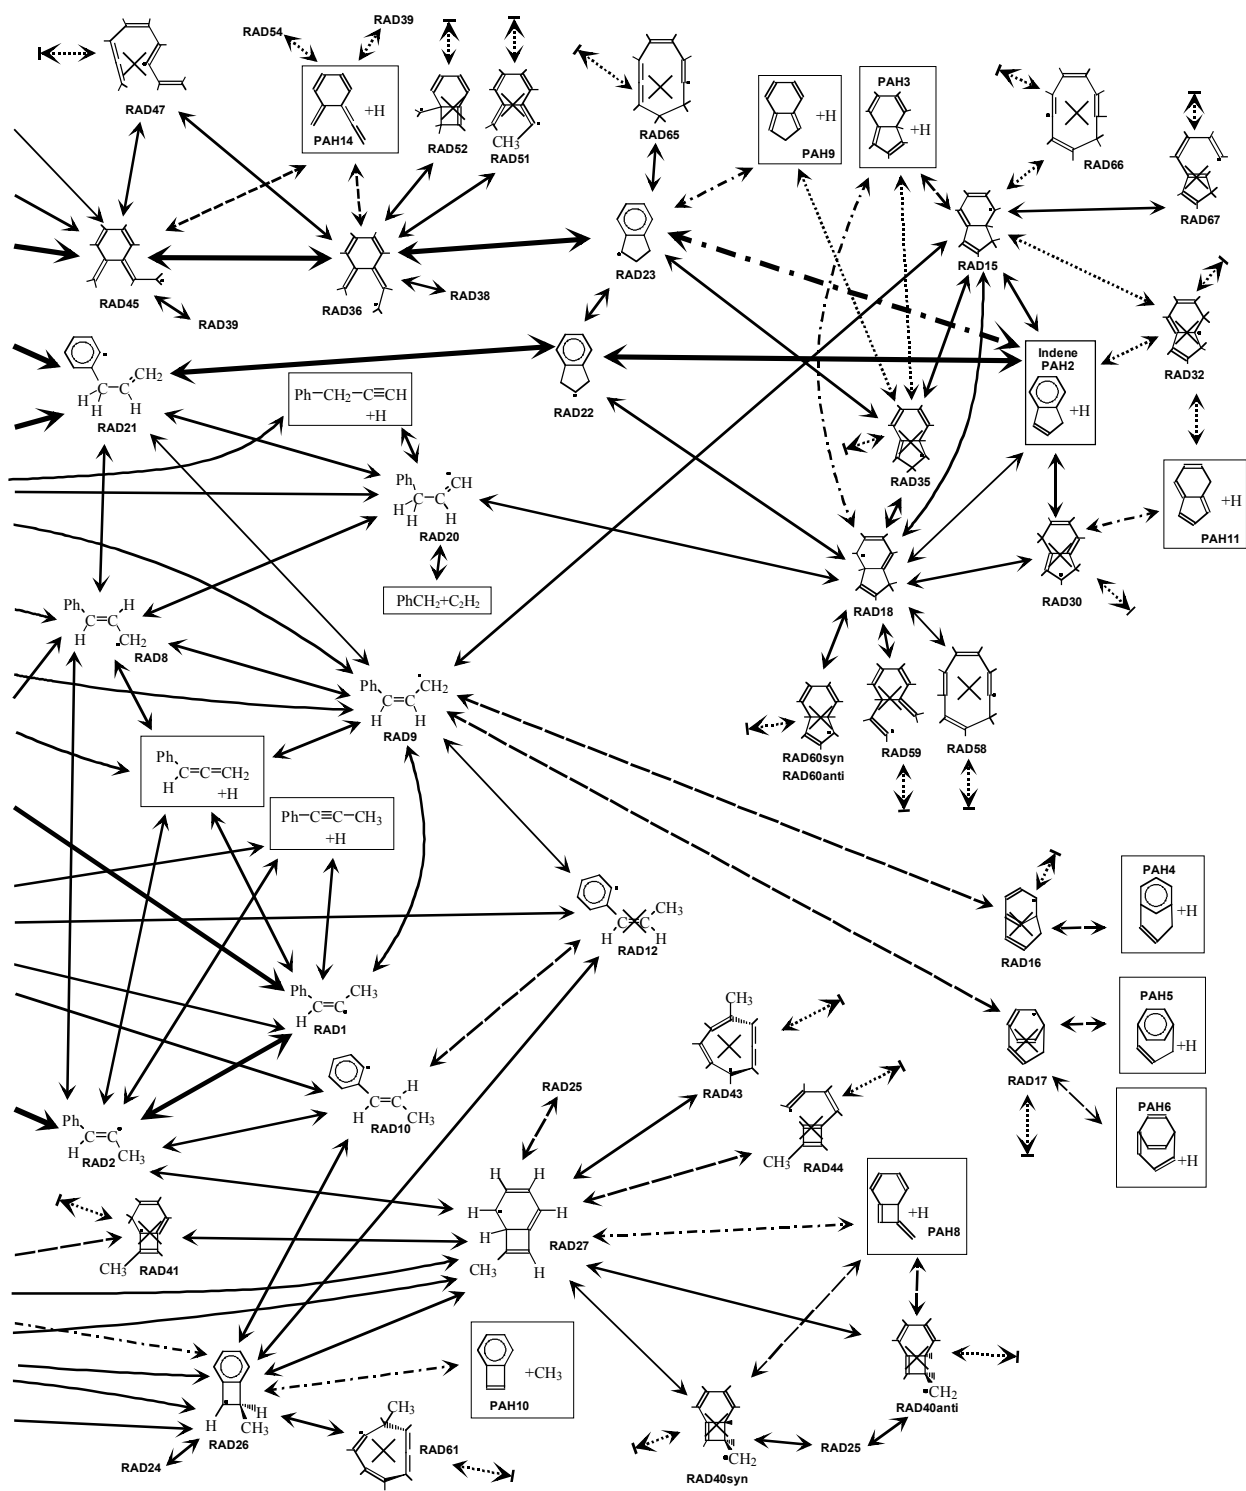

(Right Hand Side)
